# Supplementary material for: Investigating the Human Intestinal DNA Virome and Predicting Disease-Associated Virus–Host Interactions in Severe Myalgic Encephalomyelitis/Chronic Fatigue Syndrome (ME/CFS)
Source: MDPI journal article supplement (doi:10.3390/ijms242417267), 2023-12-08
Supplement: s1 [file s1]

Table S3-1. WMS\_vOTUs\_checkv

| contig_id                                       | contig_length | provirus | proviral_length | viral_genes | host_genes | checks_quality   | missing_quality | completeness | contamination |
|-------------------------------------------------|---------------|----------|-----------------|-------------|------------|------------------|-----------------|--------------|---------------|
| S9-final-viral-combined_k141_181[1][full]       | 2748          | No       | NA              | 0           | 0          | 2 Not-determined | Genome-fragment | NA           | 0             |
| S9-final-viral-combined_k141_27311[1][full]     | 10561         | No       | NA              | 0           | 2          | 2 Medium-quality | Genome-fragment | 80.96        | 0             |
| S9-final-viral-combined_k141_61921[1][full]     | 3541          | No       | NA              | 0           | 1          | 1 Not-determined | Genome-fragment | NA           | 0             |
| S9-final-viral-combined_k141_70652[1][H2gene]   | 1000          | No       | NA              | 1           | 0          | 0 Low-quality    | Genome-fragment | 1.86         | 0             |
| S9-final-viral-combined_k141_128240[1][full]    | 2114          | No       | NA              | 0           | 0          | 0 Not-determined | Genome-fragment | NA           | 0             |
| S9-final-viral-combined_k141_80221[1][full]     | 1203          | No       | NA              | 0           | 0          | 0 Not-determined | Genome-fragment | NA           | 0             |
| S11-final-viral-combined_k141_22140[1][full]    | 1000          | No       | NA              | 0           | 1          | 1 Low-quality    | Genome-fragment | 2.34         | 0             |
| S1-final-viral-combined_k141_132027[1][H2gene]  | 1000          | No       | NA              | 1           | 0          | 0 Low-quality    | Genome-fragment | 2.77         | 0             |
| S9-final-viral-combined_k141_101618[1][full]    | 2377          | No       | NA              | 0           | 2          | 2 Not-determined | Genome-fragment | NA           | 0             |
| S1_k141_254098                                  | 1000          | No       | NA              | 0           | 1          | 1 Low-quality    | Genome-fragment | 0.55         | 0             |
| S9-final-viral-combined_k141_21414[1][full]     | 1549          | No       | NA              | 0           | 0          | 0 Not-determined | Genome-fragment | NA           | 0             |
| S3-final-viral-combined_k141_78230[1][full]     | 1000          | No       | NA              | 0           | 0          | 0 Low-quality    | Genome-fragment | 4.52         | 0             |
| S5_k141_49235                                   | 1000          | No       | NA              | 0           | 1          | 1 Low-quality    | Genome-fragment | 1.35         | 0             |
| S9-final-viral-combined_k141_101645[1][full]    | 1618          | No       | NA              | 0           | 1          | 1 Not-determined | Genome-fragment | NA           | 0             |
| S7-final-viral-combined_k141_173981[1][full]    | 1000          | No       | NA              | 0           | 0          | 0 Low-quality    | Genome-fragment | 3.17         | 0             |
| S9-final-viral-combined_k141_16080[1][full]     | 3423          | No       | NA              | 0           | 2          | 2 Not-determined | Genome-fragment | NA           | 0             |
| S9-final-viral-combined_k141_59637[1][full]     | 2087          | No       | NA              | 0           | 0          | 0 Not-determined | Genome-fragment | NA           | 0             |
| S7-final-viral-combined_k141_163338[1][full]    | 1000          | No       | NA              | 0           | 1          | 1 Low-quality    | Genome-fragment | 1.44         | 0             |
| S9-final-viral-combined_k141_32130[1][full]     | 2477          | No       | NA              | 0           | 3          | 3 Not-determined | Genome-fragment | NA           | 0             |
| S7-final-viral-combined_k141_147972[1][H2gene]  | 1000          | No       | NA              | 0           | 0          | 0 Low-quality    | Genome-fragment | 2.69         | 0             |
| S9-final-viral-combined_k141_12858[1][full]     | 3399          | No       | NA              | 0           | 2          | 2 Not-determined | Genome-fragment | NA           | 0             |
| S9-final-viral-combined_k141_16107[1][full]     | 4057          | No       | NA              | 0           | 0          | 0 Not-determined | Genome-fragment | NA           | 0             |
| S9-final-viral-combined_k141_26779[1][full]     | 2234          | No       | NA              | 0           | 0          | 0 Not-determined | Genome-fragment | NA           | 0             |
| S9-final-viral-combined_k141_74938[1][full]     | 2012          | No       | NA              | 0           | 2          | 2 Not-determined | Genome-fragment | NA           | 0             |
| S12-final-viral-combined_k141_312026[1][full]   | 1000          | No       | NA              | 0           | 0          | 0 Low-quality    | Genome-fragment | 2.58         | 0             |
| S2-final-viral-combined_k141_5078[1][full]      | 1000          | No       | NA              | 1           | 0          | 0 Low-quality    | Genome-fragment | 2.25         | 0             |
| S4-final-viral-combined_k141_24368[1][full]     | 1000          | No       | NA              | 0           | 0          | 0 Low-quality    | Genome-fragment | 2.12         | 0             |
| S9-final-viral-combined_k141_861[1][full]       | 3102          | No       | NA              | 0           | 2          | 2 Not-determined | Genome-fragment | NA           | 0             |
| S9-final-viral-combined_k141_101673[1][full]    | 6045          | No       | NA              | 0           | 2          | 2 Not-determined | Genome-fragment | NA           | 0             |
| S4-final-viral-combined_k141_71788[1][H2gene]   | 1000          | No       | NA              | 2           | 0          | 0 Low-quality    | Genome-fragment | 2.1          | 0             |
| S4_k141_145029                                  | 1000          | No       | NA              | 0           | 0          | 0 Low-quality    | Genome-fragment | 1.87         | 0             |
| S8-final-viral-combined_k141_82360[1][H2gene]   | 1000          | No       | NA              | 1           | 0          | 0 Low-quality    | Genome-fragment | 2.12         | 0             |
| S9-final-viral-combined_k141_16134[1][full]     | 1525          | No       | NA              | 0           | 2          | 2 Not-determined | Genome-fragment | NA           | 0             |
| S9-final-viral-combined_k141_34351[1][full]     | 1001          | No       | NA              | 0           | 0          | 0 Low-quality    | Genome-fragment | 1.02         | 0             |
| S9-final-viral-combined_k141_26789[1][full]     | 1108          | No       | NA              | 0           | 1          | 1 Not-determined | Genome-fragment | NA           | 0             |
| S9-final-viral-combined_k141_117781[1][full]    | 1622          | No       | NA              | 0           | 0          | 0 Not-determined | Genome-fragment | NA           | 0             |
| S9-final-viral-combined_k141_26770[1][full]     | 1946          | No       | NA              | 1           | 1          | 1 Not-determined | Genome-fragment | NA           | 0             |
| S9-final-viral-combined_k141_108039[1][H2gene]  | 1001          | No       | NA              | 1           | 0          | 0 Low-quality    | Genome-fragment | 2.34         | 0             |
| S9-final-viral-combined_k141_168[1][full]       | 4262          | No       | NA              | 0           | 3          | 3 Not-determined | Genome-fragment | NA           | 0             |
| S11-final-viral-combined_k141_60295[1][full]    | 1001          | No       | NA              | 0           | 0          | 0 Low-quality    | Genome-fragment | 2.78         | 0             |
| S11-final-viral-combined_k141_60310[1][full]    | 1001          | No       | NA              | 0           | 0          | 0 Low-quality    | Genome-fragment | 2.8          | 0             |
| S11-final-viral-combined_k141_179428[1][full]   | 1001          | No       | NA              | 0           | 0          | 0 Low-quality    | Genome-fragment | 1.64         | 0             |
| S9-final-viral-combined_k141_112457[1][full]    | 2848          | No       | NA              | 0           | 2          | 2 Not-determined | Genome-fragment | NA           | 0             |
| S9-final-viral-combined_k141_74897[1][full]     | 2344          | No       | NA              | 0           | 3          | 3 Not-determined | Genome-fragment | NA           | 0             |
| S9-final-viral-combined_k141_37568[1][full]     | 1514          | No       | NA              | 0           | 0          | 0 Not-determined | Genome-fragment | NA           | 0             |
| S5-final-viral-combined_k141_100625[1][full]    | 1001          | No       | NA              | 0           | 0          | 0 Low-quality    | Genome-fragment | 1.51         | 0             |
| S7-final-viral-combined_k141_19417[1][full]     | 1001          | No       | NA              | 0           | 1          | 1 Low-quality    | Genome-fragment | 2.42         | 0             |
| S9-final-viral-combined_k141_75027[1][full]     | 3303          | No       | NA              | 0           | 3          | 3 Not-determined | Genome-fragment | NA           | 0             |
| S9-final-viral-combined_k141_75033[1][full]     | 1004          | No       | NA              | 0           | 0          | 0 Not-determined | Genome-fragment | NA           | 0             |
| S7-final-viral-combined_k141_14684[1][full]     | 1001          | No       | NA              | 0           | 1          | 1 Low-quality    | Genome-fragment | 0.75         | 0             |
| S7_k141_210522                                  | 1001          | No       | NA              | 0           | 0          | 0 Low-quality    | Genome-fragment | 1.2          | 0             |
| S9-final-viral-combined_k141_96403[1][full]     | 6462          | No       | NA              | 0           | 4          | 4 Not-determined | Genome-fragment | NA           | 0             |
| S9-final-viral-combined_k141_101800[1][full]    | 1511          | No       | NA              | 0           | 0          | 0 Not-determined | Genome-fragment | NA           | 0             |
| S17-final-viral-combined_k141_256713[1][full]   | 1001          | No       | NA              | 0           | 0          | 0 Low-quality    | Genome-fragment | 2.28         | 0             |
| S17-final-viral-combined_k141_209668[1][full]   | 1001          | No       | NA              | 0           | 0          | 0 Low-quality    | Genome-fragment | 2.54         | 0             |
| S17_k141_145617                                 | 1001          | No       | NA              | 0           | 0          | 0 Low-quality    | Genome-fragment | 1.45         | 0             |
| S17_k141_191417                                 | 1001          | No       | NA              | 0           | 0          | 0 Low-quality    | Genome-fragment | 2.49         | 0             |
| S12-final-viral-combined_k141_67449[1][H2gene]  | 1001          | No       | NA              | 1           | 0          | 0 Low-quality    | Genome-fragment | 2.36         | 0             |
| S9-final-viral-combined_k141_89628[1][full]     | 2855          | No       | NA              | 0           | 2          | 2 Not-determined | Genome-fragment | NA           | 0             |
| S12-final-viral-combined_k141_337949[1][H2gene] | 1001          | No       | NA              | 1           | 0          | 0 Low-quality    | Genome-fragment | 2.67         | 0             |
| S12_k141_357790                                 | 1001          | No       | NA              | 0           | 1          | 1 Low-quality    | Genome-fragment | 0.17         | 0             |
| S9-final-viral-combined_k141_85755[1][full]     | 4207          | No       | NA              | 0           | 1          | 1 Not-determined | Genome-fragment | NA           | 0             |
| S9-final-viral-combined_k141_89645[1][full]     | 3178          | No       | NA              | 0           | 0          | 0 Not-determined | Genome-fragment | NA           | 0             |
| S2_k141_87457                                   | 1001          | No       | NA              | 0           | 0          | 0 Low-quality    | Genome-fragment | 1.65         | 0             |
| S4-final-viral-combined_k141_24500[1][full]     | 1001          | No       | NA              | 1           | 0          | 0 Low-quality    | Genome-fragment | 2.27         | 0             |
| S9-final-viral-combined_k141_43024[1][full]     | 1925          | No       | NA              | 0           | 1          | 1 Not-determined | Genome-fragment | NA           | 0             |
| S9-final-viral-combined_k141_2871[1][full]      | 5659          | No       | NA              | 0           | 2          | 2 Not-determined | Genome-fragment | NA           | 0             |
| S6-final-viral-combined_k141_10749[1][full]     | 1001          | No       | NA              | 0           | 1          | 1 Low-quality    | Genome-fragment | 2.35         | 0             |
| S9-final-viral-combined_k141_5476[1][full]      | 2190          | No       | NA              | 0           | 0          | 0 Not-determined | Genome-fragment | NA           | 0             |
| S9-final-viral-combined_k141_299[1][full]       | 1375          | No       | NA              | 0           | 1          | 1 Not-determined | Genome-fragment | NA           | 0             |
| S9-final-viral-combined_k141_305[1][full]       | 3295          | No       | NA              | 0           | 2          | 2 Not-determined | Genome-fragment | NA           | 0             |
| S8-final-viral-combined_k141_37709[1][full]     | 1001          | No       | NA              | 0           | 0          | 0 Low-quality    | Genome-fragment | 0.66         | 0             |
| S9-final-viral-combined_k141_26934[1][full]     | 2820          | No       | NA              | 0           | 1          | 1 Not-determined | Genome-fragment | NA           | 0             |
| S9-final-viral-combined_k141_123282[1][full]    | 1009          | No       | NA              | 0           | 1          | 1 Not-determined | Genome-fragment | NA           | 0             |
| S8_k141_166590                                  | 1001          | No       | NA              | 0           | 1          | 1 Low-quality    | Genome-fragment | 0.71         | 0             |
| S9-final-viral-combined_k141_32287[1][full]     | 2131          | No       | NA              | 0           | 1          | 1 Not-determined | Genome-fragment | NA           | 0             |
| S9-final-viral-combined_k141_32289[1][full]     | 1042          | No       | NA              | 0           | 1          | 1 Not-determined | Genome-fragment | NA           | 0             |
| S9-final-viral-combined_k141_123194[1][full]    | 1827          | No       | NA              | 0           | 1          | 1 Not-determined | Genome-fragment | NA           | 0             |
| S9-final-viral-combined_k141_48351[1][full]     | 2893          | No       | NA              | 0           | 1          | 1 Not-determined | Genome-fragment | NA           | 0             |
| S11-final-viral-combined_k141_10241[1][full]    | 1002          | No       | NA              | 0           | 0          | 0 Low-quality    | Genome-fragment | 1.63         | 0             |
| S9-final-viral-combined_k141_16253[1][full]     | 2326          | No       | NA              | 0           | 2          | 2 Not-determined | Genome-fragment | NA           | 0             |
| S9-final-viral-combined_k141_117850[1][full]    | 4441          | No       | NA              | 0           | 3          | 3 Not-determined | Genome-fragment | NA           | 0             |
| S9-final-viral-combined_k141_64277[1][full]     | 95138         | Yes      | NA              | 90419       | 34         | 12 High-quality  | High-quality    | 100          | 4.96          |
| S11_k141_218887                                 | 1002          | No       | NA              | 0           | 0          | 0 Low-quality    | Genome-fragment | 2.05         | 0             |
| S9-final-viral-combined_k141_80423[1][full]     | 1883          | No       | NA              | 0           | 2          | 2 Not-determined | Genome-fragment | NA           | 0             |
| S1-final-viral-combined_k141_238768[1][full]    | 1002          | No       | NA              | 1           | 0          | 0 Low-quality    | Genome-fragment | 1.15         | 0             |
| S5-final-viral-combined_k141_187921[1][full]    | 1002          | No       | NA              | 0           | 0          | 0 Low-quality    | Genome-fragment | 2.16         | 0             |
| S9-final-viral-combined_k141_27000[1][full]     | 3168          | No       | NA              | 0           | 1          | 1 Not-determined | Genome-fragment | NA           | 0             |
| S9-final-viral-combined_k141_101848[1][full]    | 3941          | No       | NA              | 0           | 3          | 3 Not-determined | Genome-fragment | NA           | 0             |
| S9-final-viral-combined_k141_27009[1][full]     | 5257          | No       | NA              | 0           | 4          | 4 Not-determined | Genome-fragment | NA           | 0             |
| S9-final-viral-combined_k141_96528[1][full]     | 1011          | No       | NA              | 0           | 0          | 0 Not-determined | Genome-fragment | NA           | 0             |
| S5-final-viral-combined_k141_26622[1][full]     | 1002          | No       | NA              | 1           | 0          | 0 Low-quality    | Genome-fragment | 0.61         | 0             |
| S5_k141_74139                                   | 1002          | No       | NA              | 0           | 1          | 1 Low-quality    | Genome-fragment | 0.42         | 0             |
| S9-final-viral-combined_k141_21587[1][full]     | 1630          | No       | NA              | 0           | 0          | 0 Not-determined | Genome-fragment | NA           | 0             |
| S7_k141_184241                                  | 1002          | No       | NA              | 0           | 0          | 0 Low-quality    | Genome-fragment | 1.39         | 0             |
| S7_k141_156568                                  | 1002          | No       | NA              | 0           | 1          | 1 Low-quality    | Genome-fragment | 0.66         | 0             |
| S9-final-viral-combined_k141_80509[1][full]     | 2958          | No       | NA              | 0           | 1          | 1 Not-determined | Genome-fragment | NA           | 0             |
| S17-final-viral-combined_k141_2883[1][full]     | 1002          | Yes      | NA              | 504         | 1          | 1 Low-quality    | Genome-fragment | 0.69         | 49.7          |
| S9-final-viral-combined_k141_23373[1][full]     | 1910          | No       | NA              | 0           | 0          | 0 Not-determined | Genome-fragment | NA           | 0             |
| S9-final-viral-combined_k141_117949[1][full]    | 1389          | No       | NA              | 0           | 1          | 1 Not-determined | Genome-fragment | NA           | 0             |
| S9-final-viral-combined_k141_16354[1][full]     | 1703          | No       | NA              | 0           | 1          | 1 Not-determined | Genome-fragment | NA           | 0             |
| S9-final-viral-combined_k141_48425[1][full]     | 5789          | No       | NA              | 0           | 4          | 4 Not-determined | Genome-fragment | NA           | 0             |
| S12_k141_390149                                 | 1002          | No       | NA              | 0           | 2          | 2 Low-quality    | Genome-fragment | 2.2          | 0             |
| S8-final-viral-combined_k141_195215[1][full]    | 1002          | No       | NA              | 0           | 0          | 0 Low-quality    | Genome-fragment | 1            | 0             |
| S9-final-viral-combined_k141_37598[1][full]     | 2183          | No       | NA              | 0           | 0          | 0 Not-determined | Genome-fragment | NA           | 0             |
| S8_k141_95325                                   | 1002          | No       | NA              | 0           | 0          | 0 Low-quality    | Genome-fragment | 1.73         | 0             |
| S8_k141_187889                                  | 1002          | No       | NA              | 0           | 0          | 0 Low-quality    | Genome-fragment | 3.26         | 0             |
| S1-final-viral-combined_k141_151461[1][full]    | 1003          | No       | NA              | 0           | 1          | 1 Low-quality    | Genome-fragment | 0.69         | 0             |
| S9-final-viral-combined_k141_48451[1][full]     | 2296          | No       | NA              | 0           | 2          | 2 Not-determined | Genome-fragment | NA           | 0             |
| S9-final-viral-combined_k141_16400[1][full]     | 3263          | No       | NA              | 0           | 2          | 2 Not-determined | Genome-fragment | NA           | 0             |
| S9-final-viral-combined_k141_85928[1][full]     | 2736          | No       | NA              | 0           | 1          | 1 Not-determined | Genome-fragment | NA           | 0             |
| S9-final-viral-combined_k141_112628[1][full]    | 1497          | No       | NA              | 0           | 1          | 1 Not-determined | Genome-fragment | NA           | 0             |
| S1-final-viral-combined_k141_162169[1][H2gene]  | 1003          | No       | NA              | 0           | 0          | 0 Low-quality    | Genome-fragment | 2.63         | 0             |
| S3-final-viral-combined_k141_136120[1][full]    | 1003          | No       | NA              | 0           | 0          | 0 Low-quality    | Genome-fragment | 3.04         | 0             |
| S9-final-viral-combined_k141_479[1][full]       | 2809          | No       | NA              | 0           | 2          | 2 Not-determined | Genome-fragment | NA           | 0             |
| S9-final-viral-combined_k141_117972[1][full]    | 1924          | No       | NA              | 0           | 2          | 2 Not-determined | Genome-fragment | NA           | 0             |
| S9-final-viral-combined_k141_27145[1][full]     | 6599          | No       | NA              | 0           | 2          | 2 Not-determined | Genome-fragment | NA           | 0             |
| S9-final-viral-combined_k141_59132[1][full]     | 1486          | No       | NA              | 0           | 1          | 1 Not-determined | Genome-fragment | NA           | 0             |
| S5_k141_199576                                  | 1003          | No       | NA              | 0           | 1          | 1 Low-quality    | Genome-fragment | 1.88         | 0             |
| S7-final-viral-combined_k141_66882[1][H2gene]   | 1003          | No       | NA              | 1           | 0          | 0 Low-quality    | Genome-fragment | 2.19         | 0             |
| S17-final-viral-combined_k141_80973[1][full]    | 1003          | No       | NA              | 1           | 0          | 0 Low-quality    | Genome-fragment | 6.66         | 0             |
| S9-final-viral-combined_k141_112695[1][full]    | 2514          | No       | NA              | 0           | 1          | 1 Not-determined | Genome-fragment | NA           | 0             |
| S9-final-viral-combined_k141_30603[1][full]     | 1005          | No       | NA              | 0           | 0          | 0 Not-determined | Genome-fragment | NA           | 0             |
| S9-final-viral-combined_k141_59179[1][full]     | 2886          | No       | NA              | 0           | 4          | 4 Not-determined | Genome-fragment | NA           | 0             |
| S9-final-viral-combined_k141_53731[1][full]     | 1687          | No       | NA              | 0           | 3          | 3 Not-determined | Genome-fragment | NA           | 0             |
| S9-final-viral-combined_k141_36645[1][full]     | 1076          | No       | NA              | 0           | 2          | 2 Not-determined | Genome-fragment | NA           | 0             |
| S9-final-viral-combined_k141_48495[1][full]     | 1411          | No       | NA              | 0           | 0          | 0 Not-determined | Genome-fragment | NA           | 0             |
| S12-final-viral-combined_k141_135765[1][full]   | 1003          | No       | NA              | 2           | 0          | 0 Low-quality    | Genome-fragment | 1.77         | 0             |
| S12_k141_47120                                  | 1003          | No       | NA              | 0           | 0          | 0 Low-quality    | Genome-fragment | 0.94         | 0             |
| S9-final-viral-combined_k141_17676[1][full]     | 3769          | No       | NA              | 0           | 2          | 2 Not-determined | Genome-fragment | NA           | 0             |
| S9-final-viral-combined_k141_16439[1][full]     | 1359          | No       | NA              | 0           | 3          | 3 Not-determined | Genome-fragment | NA           | 0             |
| S9-final-viral-combined_k141_21601[1][full]     | 1568          | No       | NA              | 0           | 0          | 0 Not-determined | Genome-fragment | NA           | 0             |
| S2-final-viral-combined_k141_191035[1][full]    | 1003          | No       | NA              | 0           | 0          | 0 Low-quality    | Genome-fragment |              |               |



|                                       |          |       |     |    |       |    |                |                 |              |       |       |
|---------------------------------------|----------|-------|-----|----|-------|----|----------------|-----------------|--------------|-------|-------|
| 59-final-viral-combined_k141_861031   | [full]   | 2608  | No  | NA | 0     | 2  | Not-determined | Genome-fragment | NA           | 0     | 0     |
| 59-final-viral-combined_k141_7021     | [full]   | 3727  | No  | NA | 0     | 2  | Not-determined | Genome-fragment | NA           | 0     | 0     |
| 59-final-viral-combined_k141_861181   | [full]   | 2382  | No  | NA | 0     | 0  | Not-determined | Genome-fragment | NA           | 0     | 0     |
| 59-final-viral-combined_k141_378031   | [full]   | 1048  | No  | NA | 0     | 1  | Not-determined | Genome-fragment | NA           | 0     | 0     |
| 52-final-viral-combined_k141_426871   | [full]   | 1004  | No  | NA | 3     | 0  | Low-quality    | Genome-fragment | NA           | 1.65  | 0     |
| 52-final-viral-combined_k141_704511   | [full]   | 1004  | No  | NA | 0     | 0  | Low-quality    | Genome-fragment | NA           | 2.24  | 0     |
| 59-final-viral-combined_k141_1022191  | [full]   | 1520  | No  | NA | 0     | 1  | Not-determined | Genome-fragment | NA           | 2.64  | 0     |
| 54-final-viral-combined_k141_878921   | [H2gene] | 1004  | No  | NA | 1     | 0  | Low-quality    | Genome-fragment | NA           | 2.64  | 0     |
| 59-final-viral-combined_k141_487681   | [full]   | 4645  | No  | NA | 0     | 1  | Not-determined | Genome-fragment | NA           | 0.8   | 0     |
| 58-final-viral-combined_k141_1476651  | [full]   | 1004  | No  | NA | 0     | 0  | Low-quality    | Genome-fragment | NA           | 1.84  | 0     |
| 59-final-viral-combined_k141_1082411  | [full]   | 1005  | No  | NA | 0     | 2  | Low-quality    | Genome-fragment | NA           | 0.89  | 0     |
| 511-final-viral-combined_k141_241211  | [full]   | 1005  | No  | NA | 0     | 0  | Low-quality    | Genome-fragment | NA           | 0     | 0     |
| 59-final-viral-combined_k141_539131   | [full]   | 2392  | No  | NA | 0     | 2  | Not-determined | Genome-fragment | NA           | 0     | 0     |
| 59-final-viral-combined_k141_1182371  | [full]   | 2111  | No  | NA | 0     | 1  | Not-determined | Genome-fragment | NA           | 2.26  | 0     |
| 511_k141_257486                       |          | 1005  | No  | NA | 0     | 0  | Low-quality    | Genome-fragment | NA           | 0     | 0     |
| 59-final-viral-combined_k141_217721   | [full]   | 7156  | No  | NA | 1     | 0  | Not-determined | Genome-fragment | NA           | 0     | 0     |
| 59-final-viral-combined_k141_165131   | [full]   | 1923  | No  | NA | 0     | 2  | Not-determined | Genome-fragment | NA           | 0     | 0     |
| 59-final-viral-combined_k141_27671    | [full]   | 4900  | No  | NA | 0     | 0  | Not-determined | Genome-fragment | NA           | 80.16 | 0     |
| 59-final-viral-combined_k141_109901   | [full]   | 52578 | No  | NA | 1     | 18 | Medium-quality | Genome-fragment | NA           | 2.63  | 0     |
| 55_k141_167266                        |          | 1005  | No  | NA | 0     | 0  | Low-quality    | Genome-fragment | NA           | 0.45  | 0     |
| 59-final-viral-combined_k141_272691   | [full]   | 2687  | No  | NA | 0     | 1  | Not-determined | Genome-fragment | NA           | 0     | 0     |
| 517-final-viral-combined_k141_2302741 | [full]   | 1005  | No  | NA | 0     | 1  | Low-quality    | Genome-fragment | NA           | 0     | 0     |
| 59-final-viral-combined_k141_378801   | [full]   | 2114  | No  | NA | 0     | 2  | Not-determined | Genome-fragment | NA           | 0     | 0     |
| 59-final-viral-combined_k141_272781   | [full]   | 2464  | No  | NA | 0     | 1  | Not-determined | Genome-fragment | NA           | 2.39  | 0     |
| 512-final-viral-combined_k141_1508341 | [full]   | 1005  | No  | NA | 0     | 0  | Low-quality    | Genome-fragment | NA           | 0.62  | 0     |
| 512-final-viral-combined_k141_3563551 | [H2gene] | 1005  | No  | NA | 0     | 0  | Low-quality    | Genome-fragment | NA           | 0     | 0     |
| 59-final-viral-combined_k141_1073181  | [full]   | 2853  | No  | NA | 0     | 0  | Not-determined | Genome-fragment | NA           | 1.04  | 0     |
| 59-final-viral-combined_k141_165801   | [full]   | 2707  | No  | NA | 0     | 0  | Not-determined | Genome-fragment | NA           | 0     | 0     |
| 512_k141_160583                       |          | 1005  | No  | NA | 1     | 1  | Low-quality    | Genome-fragment | NA           | 0     | 0     |
| 59-final-viral-combined_k141_808971   | [full]   | 4099  | No  | NA | 0     | 0  | Not-determined | Genome-fragment | NA           | 0     | 0     |
| 59-final-viral-combined_k141_1022971  | [full]   | 2760  | No  | NA | 0     | 2  | Not-determined | Genome-fragment | NA           | 2.35  | 0     |
| 59-final-viral-combined_k141_1182371  | [full]   | 4656  | No  | NA | 3     | 1  | Not-determined | Genome-fragment | NA           | 0     | 0     |
| 59-final-viral-combined_k141_594921   | [full]   | 1146  | No  | NA | 0     | 1  | Not-determined | Genome-fragment | NA           | 0     | 0     |
| 59-final-viral-combined_k141_1129031  | [full]   | 2427  | No  | NA | 0     | 2  | Not-determined | Genome-fragment | NA           | 0     | 0     |
| 54_k141_132142                        |          | 1005  | No  | NA | 0     | 0  | Low-quality    | Genome-fragment | NA           | 0     | 0     |
| 59-final-viral-combined_k141_8241     | [full]   | 2295  | No  | NA | 0     | 1  | Not-determined | Genome-fragment | NA           | 0     | 0     |
| 59-final-viral-combined_k141_1129161  | [full]   | 2348  | No  | NA | 0     | 3  | Not-determined | Genome-fragment | NA           | 0     | 0     |
| 59-final-viral-combined_k141_539511   | [full]   | 6198  | Yes | NA | 38377 | 26 | 13             | High-quality    | High-quality | 90.69 | 38.04 |
| 56-final-viral-combined_k141_1301831  | [H2gene] | 1005  | No  | NA | 1     | 0  | Low-quality    | Genome-fragment | NA           | 1.32  | 0     |
| 59-final-viral-combined_k141_1023441  | [full]   | 3777  | No  | NA | 0     | 0  | Not-determined | Genome-fragment | NA           | 0     | 0     |
| 59-final-viral-combined_k141_862471   | [full]   | 1010  | No  | NA | 0     | 0  | Not-determined | Genome-fragment | NA           | 0     | 0     |
| 58-final-viral-combined_k141_1206561  | [full]   | 1005  | No  | NA | 1     | 0  | Low-quality    | Genome-fragment | NA           | 0.68  | 0     |
| 58_k141_234378                        |          | 1005  | No  | NA | 0     | 0  | Low-quality    | Genome-fragment | NA           | 0     | 0     |
| 59-final-viral-combined_k141_809751   | [full]   | 1121  | No  | NA | 0     | 0  | Not-determined | Genome-fragment | NA           | 0     | 0     |
| 59-final-viral-combined_k141_8981     | [full]   | 2197  | No  | NA | 0     | 1  | Not-determined | Genome-fragment | NA           | 0     | 0     |
| 59-final-viral-combined_k141_595511   | [full]   | 4888  | No  | NA | 0     | 2  | Not-determined | Genome-fragment | NA           | 0.64  | 0     |
| 58_k141_22586                         |          | 1005  | No  | NA | 0     | 0  | Low-quality    | Genome-fragment | NA           | 2.55  | 0     |
| 59-final-viral-combined_k141_1023611  | [full]   | 5078  | No  | NA | 0     | 6  | Not-determined | Genome-fragment | NA           | 0.56  | 0     |
| 59-final-viral-combined_k141_928461   | [full]   | 1006  | No  | NA | 0     | 0  | Low-quality    | Genome-fragment | NA           | 0     | 0     |
| 59_k141_5414                          |          | 1006  | No  | NA | 0     | 0  | Low-quality    | Genome-fragment | NA           | 0     | 0     |
| 59-final-viral-combined_k141_1023681  | [full]   | 2183  | No  | NA | 0     | 1  | Not-determined | Genome-fragment | NA           | 1.51  | 0     |
| 59-final-viral-combined_k141_232601   | [full]   | 6808  | No  | NA | 0     | 1  | Not-determined | Genome-fragment | NA           | 2.06  | 0     |
| 59-final-viral-combined_k141_9161     | [full]   | 5764  | No  | NA | 0     | 1  | Not-determined | Genome-fragment | NA           | 1.59  | 0     |
| 59-final-viral-combined_k141_488561   | [full]   | 2275  | No  | NA | 0     | 0  | Not-determined | Genome-fragment | NA           | 2.07  | 0     |
| 511_k141_96511                        |          | 1006  | No  | NA | 0     | 0  | Low-quality    | Genome-fragment | NA           | 0     | 0     |
| 59-final-viral-combined_k141_59321    | [full]   | 3430  | No  | NA | 0     | 0  | Not-determined | Genome-fragment | NA           | 1.69  | 0     |
| 59-final-viral-combined_k141_646591   | [full]   | 1171  | No  | NA | 0     | 1  | Not-determined | Genome-fragment | NA           | 0     | 0     |
| 59-final-viral-combined_k141_5931     | [full]   | 1378  | No  | NA | 0     | 0  | Not-determined | Genome-fragment | NA           | 0     | 0     |
| 59-final-viral-combined_k141_180081   | [full]   | 2032  | No  | NA | 0     | 2  | Not-determined | Genome-fragment | NA           | 0     | 0     |
| 59-final-viral-combined_k141_646761   | [full]   | 1246  | No  | NA | 0     | 1  | Not-determined | Genome-fragment | NA           | 0     | 0     |
| 59-final-viral-combined_k141_971421   | [full]   | 7110  | No  | NA | 0     | 5  | Not-determined | Genome-fragment | NA           | 0     | 0     |
| 59-final-viral-combined_k141_126691   | [full]   | 3323  | No  | NA | 0     | 1  | Not-determined | Genome-fragment | NA           | 0     | 0     |
| 51-final-viral-combined_k141_709201   | [full]   | 1006  | No  | NA | 0     | 0  | Low-quality    | Genome-fragment | NA           | 1.51  | 0     |
| 55_k141_67176                         |          | 1006  | No  | NA | 0     | 0  | Low-quality    | Genome-fragment | NA           | 2.06  | 0     |
| 59-final-viral-combined_k141_488911   | [full]   | 2210  | No  | NA | 0     | 2  | Not-determined | Genome-fragment | NA           | 1.67  | 0     |
| 57-final-viral-combined_k141_540601   | [full]   | 1006  | No  | NA | 0     | 0  | Low-quality    | Genome-fragment | NA           | 0     | 0     |
| 512-final-viral-combined_k141_96661   | [full]   | 1006  | No  | NA | 0     | 0  | Low-quality    | Genome-fragment | NA           | 0     | 0     |
| 59-final-viral-combined_k141_226001   | [full]   | 2110  | No  | NA | 0     | 1  | Not-determined | Genome-fragment | NA           | 1.78  | 0     |
| 59-final-viral-combined_k141_647211   | [full]   | 2017  | No  | NA | 0     | 1  | Not-determined | Genome-fragment | NA           | 0     | 0     |
| 512-final-viral-combined_k141_1993601 | [full]   | 1006  | No  | NA | 2     | 0  | Low-quality    | Genome-fragment | NA           | 0     | 0     |
| 59-final-viral-combined_k141_111011   | [full]   | 16618 | No  | NA | 0     | 6  | Not-determined | Genome-fragment | NA           | 0     | 0     |
| 59-final-viral-combined_k141_489111   | [full]   | 4270  | No  | NA | 0     | 1  | Not-determined | Genome-fragment | NA           | 0     | 0     |
| 59-final-viral-combined_k141_810631   | [full]   | 1841  | No  | NA | 0     | 2  | Not-determined | Genome-fragment | NA           | 0     | 0     |
| 59-final-viral-combined_k141_699551   | [full]   | 4458  | No  | NA | 0     | 0  | Not-determined | Genome-fragment | NA           | 0     | 0     |
| 59-final-viral-combined_k141_111121   | [full]   | 1755  | No  | NA | 0     | 1  | Not-determined | Genome-fragment | NA           | 0     | 0     |
| 59-final-viral-combined_k141_913741   | [full]   | 1755  | No  | NA | 0     | 1  | Not-determined | Genome-fragment | NA           | 0     | 0     |
| 52-final-viral-combined_k141_136011   | [H2gene] | 1006  | No  | NA | 0     | 0  | Low-quality    | Genome-fragment | NA           | 1.54  | 0     |
| 54_k141_62838                         |          | 1006  | No  | NA | 0     | 0  | Low-quality    | Genome-fragment | NA           | 2.52  | 0     |
| 54_k141_114413                        |          | 1006  | No  | NA | 0     | 0  | Low-quality    | Genome-fragment | NA           | 1.26  | 0     |
| 54_k141_13643                         |          | 1006  | No  | NA | 0     | 0  | Low-quality    | Genome-fragment | NA           | 2.26  | 0     |
| 56_k141_76011                         |          | 1006  | No  | NA | 1     | 0  | Low-quality    | Genome-fragment | NA           | 2.51  | 0     |
| 59-final-viral-combined_k141_824331   | [full]   | 1007  | No  | NA | 2     | 0  | Low-quality    | Genome-fragment | NA           | 2.23  | 0     |
| 59-final-viral-combined_k141_1074161  | [full]   | 2090  | No  | NA | 0     | 1  | Not-determined | Genome-fragment | NA           | 0     | 0     |
| 59-final-viral-combined_k141_700071   | [full]   | 2867  | No  | NA | 0     | 2  | Not-determined | Genome-fragment | NA           | 0     | 0     |
| 59-final-viral-combined_k141_280481   | [full]   | 1195  | No  | NA | 0     | 2  | Not-determined | Genome-fragment | NA           | 0     | 0     |
| 59-final-viral-combined_k141_111671   | [full]   | 1509  | No  | NA | 0     | 2  | Not-determined | Genome-fragment | NA           | 0     | 0     |
| 59-final-viral-combined_k141_863971   | [full]   | 4826  | No  | NA | 0     | 2  | Not-determined | Genome-fragment | NA           | 0     | 0     |
| 59-final-viral-combined_k141_28061    | [full]   | 2053  | No  | NA | 0     | 2  | Not-determined | Genome-fragment | NA           | 0     | 0     |
| 59-final-viral-combined_k141_489801   | [full]   | 4670  | No  | NA | 0     | 2  | Not-determined | Genome-fragment | NA           | 2.25  | 0     |
| 59_k141_25337                         |          | 1007  | No  | NA | 0     | 1  | Low-quality    | Genome-fragment | NA           | 0     | 0     |
| 59-final-viral-combined_k141_489991   | [full]   | 2400  | No  | NA | 0     | 3  | Not-determined | Genome-fragment | NA           | 0.84  | 0     |
| 59-final-viral-combined_k141_274311   | [full]   | 1719  | No  | NA | 0     | 0  | Not-determined | Genome-fragment | NA           | 0     | 0     |
| 511-final-viral-combined_k141_1322811 | [full]   | 1007  | No  | NA | 0     | 1  | Low-quality    | Genome-fragment | NA           | 0     | 0     |
| 59-final-viral-combined_k141_11151    | [full]   | 3274  | No  | NA | 0     | 0  | Not-determined | Genome-fragment | NA           | 0     | 0     |
| 59-final-viral-combined_k141_547521   | [full]   | 4374  | No  | NA | 0     | 0  | Not-determined | Genome-fragment | NA           | 0     | 0     |
| 59-final-viral-combined_k141_60121    | [full]   | 3639  | No  | NA | 0     | 2  | Not-determined | Genome-fragment | NA           | 0     | 0     |
| 51-final-viral-combined_k141_1683871  | [full]   | 1007  | No  | NA | 0     | 0  | Low-quality    | Genome-fragment | NA           | 0.76  | 0     |
| 59-final-viral-combined_k141_274481   | [full]   | 3836  | No  | NA | 0     | 3  | Not-determined | Genome-fragment | NA           | 1.79  | 0     |
| 51-final-viral-combined_k141_2368431  | [H2gene] | 1007  | No  | NA | 0     | 0  | Low-quality    | Genome-fragment | NA           | 0     | 0     |
| 59-final-viral-combined_k141_274711   | [full]   | 2939  | No  | NA | 0     | 1  | Not-determined | Genome-fragment | NA           | 0     | 0     |
| 59-final-viral-combined_k141_647841   | [full]   | 1769  | No  | NA | 0     | 0  | Not-determined | Genome-fragment | NA           | 0     | 0     |
| 59-final-viral-combined_k141_647851   | [full]   | 1564  | No  | NA | 0     | 0  | Not-determined | Genome-fragment | NA           | 0.72  | 0     |
| 517-final-viral-combined_k141_353071  | [full]   | 1007  | No  | NA | 0     | 0  | Low-quality    | Genome-fragment | NA           | 0     | 0     |
| 59-final-viral-combined_k141_811921   | [full]   | 2057  | No  | NA | 0     | 1  | Not-determined | Genome-fragment | NA           | 0     | 0     |
| 59-final-viral-combined_k141_5400871  | [full]   | 3583  | No  | NA | 0     | 3  | Not-determined | Genome-fragment | NA           | 1.96  | 0     |
| 59-final-viral-combined_k141_972191   | [full]   | 3835  | No  | NA | 0     | 2  | Not-determined | Genome-fragment | NA           | 0     | 0     |
| 59-final-viral-combined_k141_541021   | [full]   | 1748  | No  | NA | 0     | 3  | Not-determined | Genome-fragment | NA           | 0     | 0     |
| 59-final-viral-combined_k141_381761   | [full]   | 1562  | No  | NA | 0     | 1  | Not-determined | Genome-fragment | NA           | 0     | 0     |
| 59-final-viral-combined_k141_381831   | [full]   | 1465  | No  | NA | 0     | 0  | Not-determined | Genome-fragment | NA           | 0     | 0     |
| 59-final-viral-combined_k141_812631   | [full]   | 1016  | No  | NA | 0     | 0  | Not-determined | Genome-fragment | NA           | 0     | 0     |
| 517-final-viral-combined_k141_52211   | [full]   | 1007  | No  | NA | 0     | 0  | Low-quality    | Genome-fragment | NA           | 0     | 0     |
| 59-final-viral-combined_k141_5413161  | [full]   | 2200  | No  | NA | 0     | 0  | Not-determined | Genome-fragment | NA           | 0     | 0     |
| 59-final-viral-combined_k141_1074491  | [full]   | 2976  | No  | NA | 0     | 0  | Not-determined | Genome-fragment | NA           | 2.52  | 0     |
| 512-final-viral-combined_k141_3901121 | [full]   | 1007  | No  | NA | 1     | 0  | Low-quality    | Genome-fragment | NA           | 0     | 0     |
| 59-final-viral-combined_k141_915591   | [full]   | 2029  | No  | NA | 0     | 1  | Not-determined | Genome-fragment | NA           | 0     | 0     |
| 59-final-viral-combined_k141_275061   | [full]   | 7113  | No  | NA | 0     | 0  | Not-determined | Genome-fragment | NA           | 0     | 0     |
| 59-final-viral-combined_k141_12551    | [full]   | 1565  | No  | NA | 0     | 1  | Not-determined | Genome-fragment | NA           | 0     | 0     |
| 59-final-viral-combined_k141_123641   | [full]   | 1022  | No  | NA | 0     | 1  | Not-determined | Genome-fragment | NA           | 0     | 0     |
| 59-final-viral-combined_k141_1185531  | [full]   | 2676  | No  | NA | 0     | 0  | Not-determined | Genome-fragment | NA           | 0.54  | 0     |
| 512_k141_293816                       |          | 1007  | No  | NA | 1     | 0  | Low-quality    | Genome-fragment | NA           | 0     | 0     |
| 59-final-viral-combined_k141_915001   | [full]   | 5050  | No  | NA | 0     | 1  | Not-determined | Genome-fragment | NA           | 1.05  | 62.66 |



|                                      |          |       |    |    |   |   |                |                 |      |   |
|--------------------------------------|----------|-------|----|----|---|---|----------------|-----------------|------|---|
| S1-final-viral-combined_k141_268120  | [full]   | 1009  | No | NA | 1 | 0 | Low-quality    | Genome-fragment | 2.73 | 0 |
| S5_k141_71145                        |          | 1009  | No | NA | 0 | 0 | Low-quality    | Genome-fragment | 0.4  | 0 |
| S12-final-viral-combined_k141_136420 | [full]   | 1009  | No | NA | 0 | 0 | Low-quality    | Genome-fragment | 2.57 | 0 |
| S12-final-viral-combined_k141_89972  | [full]   | 1009  | No | NA | 2 | 0 | Low-quality    | Genome-fragment | 1.43 | 0 |
| S9-final-viral-combined_k141_27794   | [full]   | 4228  | No | NA | 0 | 4 | Not-determined | Genome-fragment | NA   | 0 |
| S9-final-viral-combined_k141_43624   | [full]   | 2884  | No | NA | 0 | 2 | Not-determined | Genome-fragment | NA   | 0 |
| S9-final-viral-combined_k141_27824   | [full]   | 3150  | No | NA | 0 | 3 | Not-determined | Genome-fragment | NA   | 0 |
| S9-final-viral-combined_k141_24375   | [full]   | 1936  | No | NA | 0 | 1 | Not-determined | Genome-fragment | NA   | 0 |
| S12-final-viral-combined_k141_297935 | [H2gene] | 1009  | No | NA | 2 | 0 | Low-quality    | Genome-fragment | 2.72 | 0 |
| S12_k141_199802                      |          | 1009  | No | NA | 1 | 0 | Low-quality    | Genome-fragment | 0.47 | 0 |
| S9-final-viral-combined_k141_75548   | [full]   | 6295  | No | NA | 0 | 3 | Not-determined | Genome-fragment | NA   | 0 |
| S12_k141_317852                      |          | 1009  | No | NA | 0 | 0 | Low-quality    | Genome-fragment | 0.54 | 0 |
| S2-final-viral-combined_k141_125920  | [full]   | 1009  | No | NA | 1 | 0 | Low-quality    | Genome-fragment | 1.41 | 0 |
| S6-final-viral-combined_k141_38689   | [full]   | 1009  | No | NA | 0 | 0 | Low-quality    | Genome-fragment | 1.38 | 0 |
| S9-final-viral-combined_k141_26775   | [full]   | 2111  | No | NA | 0 | 1 | Not-determined | Genome-fragment | NA   | 0 |
| S9-final-viral-combined_k141_36752   | [full]   | 2899  | No | NA | 0 | 0 | Not-determined | Genome-fragment | NA   | 0 |
| S9-final-viral-combined_k141_91837   | [full]   | 2703  | No | NA | 0 | 3 | Not-determined | Genome-fragment | NA   | 0 |
| S8_k141_19242                        |          | 1009  | No | NA | 0 | 1 | Low-quality    | Genome-fragment | 0.59 | 0 |
| S1_k141_202753                       |          | 1010  | No | NA | 0 | 0 | Low-quality    | Genome-fragment | 2.41 | 0 |
| S1_k141_73154                        |          | 1010  | No | NA | 0 | 1 | Low-quality    | Genome-fragment | 0.67 | 0 |
| S1_k141_390043                       |          | 1010  | No | NA | 0 | 1 | Low-quality    | Genome-fragment | 0.44 | 0 |
| S9-final-viral-combined_k141_102040  | [full]   | 1404  | No | NA | 0 | 0 | Not-determined | Genome-fragment | NA   | 0 |
| S5-final-viral-combined_k141_45398   | [full]   | 1010  | No | NA | 3 | 0 | Low-quality    | Genome-fragment | 2.64 | 0 |
| S5_k141_208360                       |          | 1010  | No | NA | 0 | 0 | Low-quality    | Genome-fragment | 0.66 | 0 |
| S9-final-viral-combined_k141_97506   | [full]   | 4155  | No | NA | 0 | 3 | Not-determined | Genome-fragment | NA   | 0 |
| S12_k141_133365                      |          | 1010  | No | NA | 0 | 2 | Low-quality    | Genome-fragment | 0.8  | 0 |
| S4-final-viral-combined_k141_22390   | [full]   | 1010  | No | NA | 0 | 1 | Low-quality    | Genome-fragment | 0.44 | 0 |
| S9-final-viral-combined_k141_43653   | [full]   | 2225  | No | NA | 0 | 1 | Not-determined | Genome-fragment | NA   | 0 |
| S9-final-viral-combined_k141_22387   | [full]   | 2989  | No | NA | 0 | 3 | Not-determined | Genome-fragment | NA   | 0 |
| S4_k141_102294                       |          | 1010  | No | NA | 0 | 0 | Low-quality    | Genome-fragment | 1.06 | 0 |
| S8_k141_43513                        |          | 1010  | No | NA | 0 | 0 | Low-quality    | Genome-fragment | 1.08 | 0 |
| S9-final-viral-combined_k141_70220   | [full]   | 1928  | No | NA | 2 | 0 | Not-determined | Genome-fragment | NA   | 0 |
| S9-final-viral-combined_k141_127926  | [full]   | 1011  | No | NA | 1 | 0 | Low-quality    | Genome-fragment | 2.16 | 0 |
| S11-final-viral-combined_k141_266226 | [full]   | 1011  | No | NA | 2 | 0 | Low-quality    | Genome-fragment | 2.38 | 0 |
| S9-final-viral-combined_k141_22477   | [full]   | 1219  | No | NA | 0 | 0 | Not-determined | Genome-fragment | NA   | 0 |
| S9-final-viral-combined_k141_11542   | [full]   | 2125  | No | NA | 0 | 0 | Not-determined | Genome-fragment | NA   | 0 |
| S11-final-viral-combined_k141_260242 | [full]   | 1011  | No | NA | 0 | 0 | Low-quality    | Genome-fragment | 1.8  | 0 |
| S9-final-viral-combined_k141_22437   | [full]   | 1655  | No | NA | 0 | 0 | Not-determined | Genome-fragment | NA   | 0 |
| S9-final-viral-combined_k141_6387    | [full]   | 2354  | No | NA | 0 | 1 | Not-determined | Genome-fragment | NA   | 0 |
| S9-final-viral-combined_k141_75612   | [full]   | 1665  | No | NA | 0 | 1 | Not-determined | Genome-fragment | NA   | 0 |
| S11-final-viral-combined_k141_312627 | [H2gene] | 1011  | No | NA | 1 | 0 | Low-quality    | Genome-fragment | 2.28 | 0 |
| S9-final-viral-combined_k141_123995  | [full]   | 1106  | No | NA | 0 | 1 | Not-determined | Genome-fragment | NA   | 0 |
| S11-final-viral-combined_k141_54431  | [H2gene] | 1011  | No | NA | 1 | 0 | Low-quality    | Genome-fragment | 0.65 | 0 |
| S9-final-viral-combined_k141_65132   | [full]   | 1728  | No | NA | 0 | 2 | Not-determined | Genome-fragment | NA   | 0 |
| S9-final-viral-combined_k141_124013  | [full]   | 3148  | No | NA | 0 | 1 | Not-determined | Genome-fragment | NA   | 0 |
| S9-final-viral-combined_k141_118836  | [full]   | 6761  | No | NA | 0 | 0 | Not-determined | Genome-fragment | NA   | 0 |
| S11_k141_19356                       |          | 1011  | No | NA | 0 | 0 | Low-quality    | Genome-fragment | 0.7  | 0 |
| S1-final-viral-combined_k141_19176   | [full]   | 1011  | No | NA | 0 | 1 | Low-quality    | Genome-fragment | 2.38 | 0 |
| S9-final-viral-combined_k141_16859   | [full]   | 2757  | No | NA | 0 | 2 | Not-determined | Genome-fragment | NA   | 0 |
| S9-final-viral-combined_k141_102893  | [full]   | 2884  | No | NA | 0 | 1 | Not-determined | Genome-fragment | NA   | 0 |
| S1-final-viral-combined_k141_39556   | [full]   | 1011  | No | NA | 0 | 0 | Low-quality    | Genome-fragment | 1.93 | 0 |
| S9-final-viral-combined_k141_70344   | [full]   | 1724  | No | NA | 0 | 0 | Not-determined | Genome-fragment | NA   | 0 |
| S9-final-viral-combined_k141_124050  | [full]   | 3234  | No | NA | 0 | 3 | Not-determined | Genome-fragment | NA   | 0 |
| S9-final-viral-combined_k141_22475   | [full]   | 2857  | No | NA | 0 | 1 | Not-determined | Genome-fragment | NA   | 0 |
| S9-final-viral-combined_k141_22476   | [full]   | 1912  | No | NA | 0 | 1 | Not-determined | Genome-fragment | NA   | 0 |
| S9-final-viral-combined_k141_6416    | [full]   | 6509  | No | NA | 0 | 0 | Not-determined | Genome-fragment | NA   | 0 |
| S9-final-viral-combined_k141_6434    | [full]   | 5896  | No | NA | 0 | 4 | Not-determined | Genome-fragment | NA   | 0 |
| S1-final-viral-combined_k141_73347   | [full]   | 1011  | No | NA | 1 | 0 | Low-quality    | Genome-fragment | 2.19 | 0 |
| S9-final-viral-combined_k141_118941  | [full]   | 2100  | No | NA | 0 | 2 | Not-determined | Genome-fragment | NA   | 0 |
| S9-final-viral-combined_k141_6448    | [full]   | 1203  | No | NA | 0 | 1 | Not-determined | Genome-fragment | NA   | 0 |
| S1-final-viral-combined_k141_78801   | [full]   | 1011  | No | NA | 0 | 0 | Low-quality    | Genome-fragment | 2.59 | 0 |
| S9-final-viral-combined_k141_316159  | [full]   | 1677  | No | NA | 0 | 0 | Not-determined | Genome-fragment | NA   | 0 |
| S9-final-viral-combined_k141_22494   | [full]   | 2907  | No | NA | 0 | 3 | Not-determined | Genome-fragment | NA   | 0 |
| S9-final-viral-combined_k141_124081  | [full]   | 1809  | No | NA | 0 | 1 | Not-determined | Genome-fragment | NA   | 0 |
| S1_k141_21907                        |          | 1011  | No | NA | 0 | 0 | Low-quality    | Genome-fragment | 1.57 | 0 |
| S7-final-viral-combined_k141_93462   | [full]   | 1011  | No | NA | 3 | 0 | Low-quality    | Genome-fragment | 2.21 | 0 |
| S7_k141_60893                        |          | 1011  | No | NA | 2 | 0 | Low-quality    | Genome-fragment | 1.94 | 0 |
| S12_k141_179759                      |          | 1011  | No | NA | 2 | 0 | Low-quality    | Genome-fragment | 1.54 | 0 |
| S9-final-viral-combined_k141_113286  | [full]   | 1519  | No | NA | 0 | 0 | Not-determined | Genome-fragment | NA   | 0 |
| S2-final-viral-combined_k141_121831  | [full]   | 1011  | No | NA | 0 | 1 | Low-quality    | Genome-fragment | 0.74 | 0 |
| S9-final-viral-combined_k141_97550   | [full]   | 6576  | No | NA | 0 | 4 | Not-determined | Genome-fragment | NA   | 0 |
| S9-final-viral-combined_k141_49339   | [full]   | 1607  | No | NA | 0 | 0 | Not-determined | Genome-fragment | NA   | 0 |
| S9-final-viral-combined_k141_124191  | [full]   | 2659  | No | NA | 0 | 0 | Not-determined | Genome-fragment | NA   | 0 |
| S9-final-viral-combined_k141_1700    | [full]   | 1288  | No | NA | 0 | 1 | Not-determined | Genome-fragment | NA   | 0 |
| S9-final-viral-combined_k141_91982   | [full]   | 2373  | No | NA | 0 | 0 | Not-determined | Genome-fragment | NA   | 0 |
| S9-final-viral-combined_k141_113325  | [full]   | 1661  | No | NA | 0 | 0 | Not-determined | Genome-fragment | NA   | 0 |
| S9-final-viral-combined_k141_49367   | [full]   | 2232  | No | NA | 0 | 0 | Not-determined | Genome-fragment | NA   | 0 |
| S2-final-viral-combined_k141_48877   | [H2gene] | 1011  | No | NA | 1 | 0 | Low-quality    | Genome-fragment | 3.46 | 0 |
| S9-final-viral-combined_k141_113134  | [full]   | 2106  | No | NA | 0 | 2 | Not-determined | Genome-fragment | NA   | 0 |
| S9-final-viral-combined_k141_61683   | [full]   | 1872  | No | NA | 0 | 2 | Not-determined | Genome-fragment | NA   | 0 |
| S9-final-viral-combined_k141_54741   | [full]   | 3801  | No | NA | 0 | 0 | Not-determined | Genome-fragment | NA   | 0 |
| S9-final-viral-combined_k141_501512  | [full]   | 1748  | No | NA | 0 | 2 | Not-determined | Genome-fragment | NA   | 0 |
| S9-final-viral-combined_k141_81767   | [full]   | 1890  | No | NA | 0 | 2 | Not-determined | Genome-fragment | NA   | 0 |
| S9-final-viral-combined_k141_48812   | [full]   | 2690  | No | NA | 0 | 3 | Not-determined | Genome-fragment | NA   | 0 |
| S2_k141_209746                       |          | 1011  | No | NA | 0 | 0 | Low-quality    | Genome-fragment | 0.21 | 0 |
| S4_k141_30108                        |          | 1011  | No | NA | 0 | 0 | Low-quality    | Genome-fragment | 1.01 | 0 |
| S4_k141_59007                        |          | 1011  | No | NA | 0 | 0 | Low-quality    | Genome-fragment | 1.08 | 0 |
| S6_k141_36305                        |          | 1011  | No | NA | 0 | 0 | Low-quality    | Genome-fragment | 0.63 | 0 |
| S9-final-viral-combined_k141_107986  | [full]   | 1313  | No | NA | 0 | 0 | Not-determined | Genome-fragment | NA   | 0 |
| S9-final-viral-combined_k141_41230   | [H2gene] | 1012  | No | NA | 2 | 0 | Low-quality    | Genome-fragment | 2.2  | 0 |
| S9-final-viral-combined_k141_119028  | [full]   | 2167  | No | NA | 0 | 2 | Not-determined | Genome-fragment | NA   | 0 |
| S11-final-viral-combined_k141_260594 | [full]   | 1012  | No | NA | 0 | 0 | Low-quality    | Genome-fragment | 2.4  | 0 |
| S1-final-viral-combined_k141_363364  | [full]   | 1012  | No | NA | 0 | 1 | Low-quality    | Genome-fragment | 0.83 | 0 |
| S9-final-viral-combined_k141_97633   | [full]   | 2086  | No | NA | 0 | 2 | Not-determined | Genome-fragment | NA   | 0 |
| S9-final-viral-combined_k141_22701   | [full]   | 4420  | No | NA | 0 | 3 | Not-determined | Genome-fragment | NA   | 0 |
| S9-final-viral-combined_k141_75888   | [full]   | 3102  | No | NA | 0 | 2 | Not-determined | Genome-fragment | NA   | 0 |
| S9-final-viral-combined_k141_65378   | [full]   | 4624  | No | NA | 0 | 1 | Not-determined | Genome-fragment | NA   | 0 |
| S1_k141_346007                       |          | 1012  | No | NA | 0 | 1 | Low-quality    | Genome-fragment | 0.38 | 0 |
| S9-final-viral-combined_k141_119043  | [full]   | 1902  | No | NA | 0 | 2 | Not-determined | Genome-fragment | NA   | 0 |
| S1_k141_342765                       |          | 1012  | No | NA | 0 | 1 | Low-quality    | Genome-fragment | 0.64 | 0 |
| S9-final-viral-combined_k141_60228   | [full]   | 1964  | No | NA | 0 | 2 | Not-determined | Genome-fragment | NA   | 0 |
| S3-final-viral-combined_k141_38471   | [full]   | 1012  | No | NA | 0 | 0 | Low-quality    | Genome-fragment | 1.64 | 0 |
| S5-final-viral-combined_k141_163033  | [full]   | 1012  | No | NA | 1 | 0 | Low-quality    | Genome-fragment | 1.59 | 0 |
| S9-final-viral-combined_k141_124178  | [full]   | 1477  | No | NA | 0 | 0 | Not-determined | Genome-fragment | NA   | 0 |
| S9-final-viral-combined_k141_17102   | [full]   | 1214  | No | NA | 0 | 0 | Not-determined | Genome-fragment | NA   | 0 |
| S5-final-viral-combined_k141_7633    | [full]   | 1012  | No | NA | 0 | 0 | Low-quality    | Genome-fragment | 0.57 | 0 |
| S9-final-viral-combined_k141_17104   | [full]   | 2536  | No | NA | 0 | 3 | Not-determined | Genome-fragment | NA   | 0 |
| S9-final-viral-combined_k141_49486   | [full]   | 4755  | No | NA | 0 | 0 | Not-determined | Genome-fragment | NA   | 0 |
| S9-final-viral-combined_k141_65428   | [full]   | 1312  | No | NA | 0 | 0 | Not-determined | Genome-fragment | NA   | 0 |
| S5-final-viral-combined_k141_193241  | [full]   | 1012  | No | NA | 1 | 0 | Low-quality    | Genome-fragment | 3    | 0 |
| S9-final-viral-combined_k141_97696   | [full]   | 1615  | No | NA | 0 | 1 | Not-determined | Genome-fragment | NA   | 0 |
| S9-final-viral-combined_k141_227358  | [full]   | 3388  | No | NA | 0 | 0 | Not-determined | Genome-fragment | NA   | 0 |
| S9-final-viral-combined_k141_43917   | [full]   | 1622  | No | NA | 0 | 0 | Not-determined | Genome-fragment | NA   | 0 |
| S9-final-viral-combined_k141_70577   | [full]   | 1813  | No | NA | 0 | 3 | Not-determined | Genome-fragment | NA   | 0 |
| S9-final-viral-combined_k141_54870   | [full]   | 6477  | No | NA | 0 | 0 | Not-determined | Genome-fragment | NA   | 0 |
| S5_k141_24917                        |          | 1012  | No | NA | 0 | 0 | Low-quality    | Genome-fragment | 0.57 | 0 |
| S7_k141_4465                         |          | 1012  | No | NA | 0 | 0 | Low-quality    | Genome-fragment | 3.05 | 0 |
| S9-final-viral-combined_k141_22768   | [full]   | 4193  | No | NA | 0 | 3 | Not-determined | Genome-fragment | NA   | 0 |
| S9-final-viral-combined_k141_54874   | [full]   | 4928  | No | NA | 0 | 0 | Not-determined | Genome-fragment | NA   | 0 |
| S2-final-viral-combined_k141_200740  | [H2gene] | 1012  | No | NA | 1 | 0 | Low-quality    | Genome-fragment | 1.74 | 0 |
| S4-final-viral-combined_k141_81877   | [full]   | 1012  | No | NA | 0 | 1 | Low-quality    | Genome-fragment | 2.73 | 0 |
| S9-final-viral-combined_k141_124241  | [full]   | 2361  | No | NA | 0 | 2 | Not-determined | Genome-fragment | NA   | 0 |
| S9-final-viral-combined_k141_108098  | [full]   | 11780 | No | NA | 0 | 2 | Not-determined | Genome-fragment | NA   | 0 |
| S4-final-viral-combined_k141_155384  | [full]   | 1012  | No | NA | 1 | 0 | Low-quality    | Genome-fragment | 2.08 | 0 |
| S9-final-viral-combined_k141_60336   | [full]   | 1919  | No | NA | 0 | 2 | Not-determined | Genome-fragment | NA   | 0 |
| S9-final-viral-combined_k141_28127   | [full]   | 1435  | No | NA | 0 | 0 | Not-determined | Genome-fragment | NA   | 0 |
| S9-final-viral-combined_k141_38556   | [full]   | 1176  | No | NA | 0 | 0 | Not-determined | Genome-fragment | NA   | 0 |
| S4_k141_120030                       |          | 1012  | No | NA | 0 | 0 | Low-quality    | Genome-fragment | 2.26 | 0 |
| S4_k141_102546                       |          | 1012  | No | NA | 0 | 0 | Low-quality    | Genome-fragment | 1.62 | 0 |
| S9-final-viral-combined_k141_28154   | [full]   | 3358  | No | NA | 0 | 2 | Not-determined | Genome-fragment | NA   | 0 |
| S9-final-viral-combined_k141_60361   | [full]   | 1758  | No | NA | 0 | 0 | Not-determined | Genome-fragment | NA   | 0 |
| S9-final-viral-combined_k141_113537  | [full]   | 1410  | No | NA | 0 | 0 | Not-determined |                 |      |   |



|                                      |           |       |   |                |                 |                 |       |       |
|--------------------------------------|-----------|-------|---|----------------|-----------------|-----------------|-------|-------|
| 52_k141_243481                       | 1013 No   | NA    | 0 | 1              | Low-quality     | Genome-fragment | 1.28  | 0     |
| 59-final-viral-combined_k141_103203  | 2290 No   | NA    | 0 | 1              | Not-determined  | Genome-fragment | NA    | 0     |
| 59-final-viral-combined_k141_87023   | 1960 No   | NA    | 0 | 2              | Not-determined  | Genome-fragment | NA    | 0     |
| 511-final-viral-combined_k141_40047  | 1014 No   | NA    | 0 | 1              | Low-quality     | Genome-fragment | 0.46  | 0     |
| 59-final-viral-combined_k141_55689   | 1506 No   | NA    | 0 | 1              | Not-determined  | Genome-fragment | NA    | 0     |
| 59-final-viral-combined_k141_55042   | 4244 No   | NA    | 0 | 1              | Not-determined  | Genome-fragment | NA    | 0     |
| 59-final-viral-combined_k141_11866   | 1988 No   | NA    | 0 | 1              | Not-determined  | Genome-fragment | NA    | 0     |
| 59-final-viral-combined_k141_87106   | 1042 No   | NA    | 0 | 0              | Not-determined  | Genome-fragment | NA    | 0     |
| 59-final-viral-combined_k141_103171  | 2102 No   | NA    | 0 | 0              | Not-determined  | Genome-fragment | NA    | 0     |
| 59-final-viral-combined_k141_49726   | 4409 No   | NA    | 0 | 0              | Not-determined  | Genome-fragment | NA    | 0     |
| 59-final-viral-combined_k141_17376   | 2169 No   | NA    | 0 | 2              | Not-determined  | Genome-fragment | NA    | 0     |
| 511-final-viral-combined_k141_24231  | 1014 No   | NA    | 0 | 0              | Low-quality     | Genome-fragment | 2.77  | 0     |
| 59-final-viral-combined_k141_28314   | 2234 No   | NA    | 0 | 1              | Not-determined  | Genome-fragment | NA    | 0     |
| 511_k141_289981                      | 1014 No   | NA    | 0 | 0              | Low-quality     | Genome-fragment | 2.18  | 0     |
| 59-final-viral-combined_k141_28321   | 2474 No   | NA    | 0 | 2              | Not-determined  | Genome-fragment | NA    | 0     |
| 51_k141_271796                       | 1014 No   | NA    | 0 | 0              | Low-quality     | Genome-fragment | 0.59  | 0     |
| 55-final-viral-combined_k141_170026  | 1014 No   | NA    | 0 | 0              | Low-quality     | Genome-fragment | 2     | 0     |
| 55-final-viral-combined_k141_518     | 1014 No   | NA    | 0 | 0              | Low-quality     | Genome-fragment | 2.59  | 0     |
| 57-final-viral-combined_k141_57860   | 1014 No   | NA    | 0 | 2              | Low-quality     | Genome-fragment | 0.32  | 0     |
| 59-final-viral-combined_k141_108227  | 1768 No   | NA    | 0 | 2              | Not-determined  | Genome-fragment | NA    | 0     |
| 59-final-viral-combined_k141_75960   | 1547 No   | NA    | 0 | 3              | Not-determined  | Genome-fragment | NA    | 0     |
| 517-k141_157531                      | 1014 No   | NA    | 0 | 0              | Low-quality     | Genome-fragment | 2.07  | 0     |
| 517-k141_86259                       | 1014 No   | NA    | 0 | 0              | Low-quality     | Genome-fragment | 1.74  | 0     |
| 512-final-viral-combined_k141_34117  | 1014 No   | NA    | 1 | 0              | Low-quality     | Genome-fragment | 2.06  | 0     |
| 512-final-viral-combined_k141_321842 | 1014 No   | NA    | 0 | 0              | Low-quality     | Genome-fragment | 1.71  | 0     |
| 59-final-viral-combined_k141_31567   | 2416 No   | NA    | 0 | 1              | Not-determined  | Genome-fragment | NA    | 0     |
| 512-final-viral-combined_k141_367240 | 1014 No   | NA    | 0 | 0              | Low-quality     | Genome-fragment | 2.79  | 0     |
| 52-final-viral-combined_k141_76965   | 1014 No   | NA    | 1 | 0              | Low-quality     | Genome-fragment | 2.6   | 0     |
| 59-final-viral-combined_k141_37840   | 2284 No   | NA    | 2 | Not-determined | Genome-fragment | NA              | 0     | 0     |
| 59-final-viral-combined_k141_119138  | 19823 No  | NA    | 0 | 11             | Not-determined  | Genome-fragment | NA    | 0     |
| 59-final-viral-combined_k141_76013   | 1603 No   | NA    | 0 | 1              | Not-determined  | Genome-fragment | NA    | 0     |
| 59-final-viral-combined_k141_38824   | 2630 No   | NA    | 0 | 1              | Not-determined  | Genome-fragment | NA    | 0     |
| 52-final-viral-combined_k141_80291   | 1014 No   | NA    | 1 | 0              | Low-quality     | Genome-fragment | 2.74  | 0     |
| 59-final-viral-combined_k141_108280  | 1597 No   | NA    | 0 | 0              | Not-determined  | Genome-fragment | NA    | 0     |
| 59-final-viral-combined_k141_49846   | 4402 No   | NA    | 0 | 0              | Not-determined  | Genome-fragment | NA    | 0     |
| 59-final-viral-combined_k141_55859   | 2822 No   | NA    | 0 | 1              | Not-determined  | Genome-fragment | NA    | 0     |
| 54-final-viral-combined_k141_103131  | 1014 No   | NA    | 0 | 1              | Low-quality     | Genome-fragment | 1.48  | 0     |
| 54-final-viral-combined_k141_58989   | 1014 No   | NA    | 1 | 0              | Low-quality     | Genome-fragment | 2.28  | 0     |
| 59-final-viral-combined_k141_23081   | 3304 No   | NA    | 0 | 3              | Not-determined  | Genome-fragment | NA    | 0     |
| 56-final-viral-combined_k141_1339    | 1014 No   | NA    | 0 | 1              | Low-quality     | Genome-fragment | 0.48  | 0     |
| 59-final-viral-combined_k141_65877   | 1974 No   | NA    | 0 | 2              | Not-determined  | Genome-fragment | NA    | 0     |
| 58-final-viral-combined_k141_83451   | 1014 No   | NA    | 0 | 0              | Low-quality     | Genome-fragment | 1.78  | 0     |
| 59-final-viral-combined_k141_17525   | 2422 No   | NA    | 0 | 2              | Not-determined  | Genome-fragment | NA    | 0     |
| 58_k141_173134                       | 1014 No   | NA    | 0 | 0              | Low-quality     | Genome-fragment | 0.75  | 0     |
| 59-final-viral-combined_k141_60600   | 2187 No   | NA    | 0 | 1              | Not-determined  | Genome-fragment | NA    | 0     |
| 59-final-viral-combined_k141_2042    | 38861 Yes | 31053 | 5 | 0              | Medium-quality  | Genome-fragment | 68.98 | 20.09 |
| 59-final-viral-combined_k141_23130   | 2086 No   | NA    | 0 | 0              | Not-determined  | Genome-fragment | NA    | 0     |
| 59-final-viral-combined_k141_76068   | 2866 No   | NA    | 0 | 0              | Not-determined  | Genome-fragment | NA    | 0     |
| 59-final-viral-combined_k141_85743   | 1015 No   | NA    | 0 | 0              | Low-quality     | Genome-fragment | 3.19  | 0     |
| 59-final-viral-combined_k141_115400  | 1015 No   | NA    | 0 | 0              | Low-quality     | Genome-fragment | 0.4   | 0     |
| 59-final-viral-combined_k141_23142   | 13473 No  | NA    | 0 | 1              | Not-determined  | Genome-fragment | NA    | 0     |
| 59-final-viral-combined_k141_49880   | 1553 No   | NA    | 0 | 0              | Not-determined  | Genome-fragment | NA    | 0     |
| 511-final-viral-combined_k141_59514  | 1015 No   | NA    | 0 | 0              | Low-quality     | Genome-fragment | 1.65  | 0     |
| 59-final-viral-combined_k141_33405   | 1884 No   | NA    | 0 | 2              | Not-determined  | Genome-fragment | NA    | 0     |
| 511_k141_23956                       | 1015 No   | NA    | 0 | 0              | Low-quality     | Genome-fragment | 1.67  | 0     |
| 51-final-viral-combined_k141_76605   | 1015 No   | NA    | 0 | 0              | Low-quality     | Genome-fragment | 0.76  | 0     |
| 51-final-viral-combined_k141_375441  | 1015 No   | NA    | 0 | 1              | Low-quality     | Genome-fragment | 2.17  | 0     |
| 59-final-viral-combined_k141_33421   | 1723 No   | NA    | 0 | 3              | Not-determined  | Genome-fragment | NA    | 0     |
| 53-final-viral-combined_k141_78746   | 1015 No   | NA    | 0 | 1              | Low-quality     | Genome-fragment | 2.52  | 0     |
| 59-final-viral-combined_k141_2130    | 2653 No   | NA    | 0 | 4              | Not-determined  | Genome-fragment | NA    | 0     |
| 59-final-viral-combined_k141_124574  | 1686 No   | NA    | 0 | 3              | Not-determined  | Genome-fragment | NA    | 0     |
| 59-final-viral-combined_k141_17589   | 2183 No   | NA    | 0 | 2              | Not-determined  | Genome-fragment | NA    | 0     |
| 59-final-viral-combined_k141_55305   | 1332 No   | NA    | 0 | 1              | Not-determined  | Genome-fragment | NA    | 0     |
| 59-final-viral-combined_k141_17591   | 4162 No   | NA    | 0 | 0              | Not-determined  | Genome-fragment | NA    | 0     |
| 53_k141_12277                        | 1015 No   | NA    | 0 | 1              | Low-quality     | Genome-fragment | 2.44  | 0     |
| 59-final-viral-combined_k141_103358  | 8408 No   | NA    | 0 | 3              | Not-determined  | Genome-fragment | NA    | 0     |
| 55-final-viral-combined_k141_135348  | 1015 No   | NA    | 3 | 0              | Low-quality     | Genome-fragment | 2.57  | 0     |
| 59-final-viral-combined_k141_71022   | 1018 No   | NA    | 0 | 2              | Not-determined  | Genome-fragment | NA    | 0     |
| 59-final-viral-combined_k141_55339   | 4769 No   | NA    | 0 | 2              | Not-determined  | Genome-fragment | NA    | 0     |
| 55-final-viral-combined_k141_79883   | 1015 No   | NA    | 1 | 0              | Low-quality     | Genome-fragment | 1.52  | 0     |
| 59-final-viral-combined_k141_55349   | 2669 No   | NA    | 0 | 1              | Not-determined  | Genome-fragment | NA    | 0     |
| 59-final-viral-combined_k141_82135   | 2714 No   | NA    | 0 | 2              | Not-determined  | Genome-fragment | NA    | 0     |
| 59-final-viral-combined_k141_97913   | 1433 No   | NA    | 0 | 2              | Not-determined  | Genome-fragment | NA    | 0     |
| 57-final-viral-combined_k141_220984  | 1015 Yes  | 503   | 1 | 1              | Low-quality     | Genome-fragment | 1.4   | 50.44 |
| 517-final-viral-combined_k141_24471  | 1015 No   | NA    | 0 | 2              | Low-quality     | Genome-fragment | 0.36  | 0     |
| 512-final-viral-combined_k141_25826  | 1015 No   | NA    | 0 | 0              | Low-quality     | Genome-fragment | 1.66  | 0     |
| 59-final-viral-combined_k141_108379  | 2556 No   | NA    | 0 | 1              | Not-determined  | Genome-fragment | NA    | 0     |
| 59-final-viral-combined_k141_55404   | 2179 No   | NA    | 0 | 1              | Not-determined  | Genome-fragment | NA    | 0     |
| 59-final-viral-combined_k141_7221    | 1553 No   | NA    | 0 | 1              | Not-determined  | Genome-fragment | NA    | 0     |
| 512-final-viral-combined_k141_211435 | 1015 No   | NA    | 1 | 0              | Low-quality     | Genome-fragment | 2.56  | 0     |
| 59-final-viral-combined_k141_55416   | 3682 No   | NA    | 0 | 4              | Not-determined  | Genome-fragment | NA    | 0     |
| 59-final-viral-combined_k141_57945   | 1998 No   | NA    | 0 | 2              | Not-determined  | Genome-fragment | NA    | 0     |
| 512_k141_351943                      | 1015 No   | NA    | 0 | 0              | Low-quality     | Genome-fragment | 3.86  | 0     |
| 59-final-viral-combined_k141_97948   | 3083 No   | NA    | 0 | 0              | Not-determined  | Genome-fragment | NA    | 0     |
| 59-final-viral-combined_k141_60754   | 2282 No   | NA    | 0 | 0              | Not-determined  | Genome-fragment | NA    | 0     |
| 512_k141_81639                       | 1015 No   | NA    | 0 | 0              | Low-quality     | Genome-fragment | 0.55  | 0     |
| 52-final-viral-combined_k141_49613   | 1015 No   | NA    | 2 | 0              | Low-quality     | Genome-fragment | 1.85  | 0     |
| 59-final-viral-combined_k141_7232    | 2610 No   | NA    | 0 | 3              | Not-determined  | Genome-fragment | NA    | 0     |
| 59-final-viral-combined_k141_82228   | 1662 No   | NA    | 0 | 0              | Not-determined  | Genome-fragment | NA    | 0     |
| 59-final-viral-combined_k141_21208   | 3730 No   | NA    | 0 | 2              | Not-determined  | Genome-fragment | NA    | 0     |
| 58-final-viral-combined_k141_107501  | 1015 No   | NA    | 1 | 0              | Low-quality     | Genome-fragment | 1.85  | 0     |
| 58-final-viral-combined_k141_271361  | 1015 No   | NA    | 0 | 0              | Low-quality     | Genome-fragment | 2.2   | 0     |
| 58-final-viral-combined_k141_10271   | 1015 No   | NA    | 0 | 0              | Low-quality     | Genome-fragment | 0.66  | 0     |
| 511-final-viral-combined_k141_33192  | 1016 No   | NA    | 1 | 0              | Low-quality     | Genome-fragment | 2.5   | 0     |
| 59-final-viral-combined_k141_17744   | 2576 No   | NA    | 0 | 2              | Not-determined  | Genome-fragment | NA    | 0     |
| 59-final-viral-combined_k141_23303   | 2894 No   | NA    | 0 | 3              | Not-determined  | Genome-fragment | NA    | 0     |
| 511-final-viral-combined_k141_207281 | 1016 No   | NA    | 1 | 0              | Low-quality     | Genome-fragment | 1.18  | 0     |
| 59-final-viral-combined_k141_17759   | 4027 No   | NA    | 0 | 1              | Not-determined  | Genome-fragment | NA    | 0     |
| 59-final-viral-combined_k141_12150   | 4577 No   | NA    | 0 | 1              | Not-determined  | Genome-fragment | NA    | 0     |
| 51-final-viral-combined_k141_194280  | 1016 No   | NA    | 0 | 1              | Low-quality     | Genome-fragment | 15.76 | 0     |
| 59-final-viral-combined_k141_17788   | 11015 No  | NA    | 0 | 6              | Not-determined  | Genome-fragment | NA    | 0     |
| 59-final-viral-combined_k141_17789   | 2498 No   | NA    | 0 | 1              | Not-determined  | Genome-fragment | NA    | 0     |
| 59-final-viral-combined_k141_28427   | 1199 No   | NA    | 0 | 1              | Not-determined  | Genome-fragment | NA    | 0     |
| 59-final-viral-combined_k141_55492   | 1274 No   | NA    | 0 | 2              | Not-determined  | Genome-fragment | NA    | 0     |
| 51_k141_218985                       | 1016 No   | NA    | 0 | 1              | Low-quality     | Genome-fragment | 0.71  | 0     |
| 55_k141_144978                       | 1016 No   | NA    | 0 | 0              | Low-quality     | Genome-fragment | 7.01  | 0     |
| 59-final-viral-combined_k141_33473   | 1202 No   | NA    | 0 | 1              | Not-determined  | Genome-fragment | NA    | 0     |
| 59-final-viral-combined_k141_55507   | 1429 No   | NA    | 0 | 0              | Not-determined  | Genome-fragment | NA    | 0     |
| 59-final-viral-combined_k141_12205   | 1542 No   | NA    | 0 | 2              | Not-determined  | Genome-fragment | NA    | 0     |
| 59-final-viral-combined_k141_82293   | 19360 No  | NA    | 0 | 10             | Not-determined  | Genome-fragment | NA    | 0     |
| 57-final-viral-combined_k141_143168  | 1016 No   | NA    | 1 | 0              | Low-quality     | Genome-fragment | 2.6   | 0     |
| 517-final-viral-combined_k141_110883 | 1016 No   | NA    | 0 | 0              | Low-quality     | Genome-fragment | 1.38  | 0     |
| 59-final-viral-combined_k141_119377  | 3419 No   | NA    | 0 | 3              | Not-determined  | Genome-fragment | NA    | 0     |
| 59-final-viral-combined_k141_87381   | 3519 No   | NA    | 0 | 2              | Not-determined  | Genome-fragment | NA    | 0     |
| 59-final-viral-combined_k141_2340    | 1215 No   | NA    | 0 | 1              | Not-determined  | Genome-fragment | NA    | 0     |
| 59-final-viral-combined_k141_71118   | 2771 No   | NA    | 0 | 1              | Not-determined  | Genome-fragment | NA    | 0     |
| 512-final-viral-combined_k141_240948 | 1016 No   | NA    | 0 | 1              | Low-quality     | Genome-fragment | 0.75  | 0     |
| 512-final-viral-combined_k141_309841 | 1016 No   | NA    | 0 | 0              | Low-quality     | Genome-fragment | 2.64  | 0     |
| 59-final-viral-combined_k141_71214   | 7164 No   | NA    | 0 | 3              | Not-determined  | Genome-fragment | NA    | 0     |
| 59-final-viral-combined_k141_55551   | 2895 No   | NA    | 0 | 2              | Not-determined  | Genome-fragment | NA    | 0     |
| 59-final-viral-combined_k141_52671   | 1647 No   | NA    | 0 | 0              | Not-determined  | Genome-fragment | NA    | 0     |
| 512-final-viral-combined_k141_160541 | 1016 No   | NA    | 0 | 0              | Low-quality     | Genome-fragment | 1.73  | 0     |
| 54_k141_114384                       | 1016 No   | NA    | 0 | 0              | Low-quality     | Genome-fragment | 1.26  | 0     |
| 59-final-viral-combined_k141_88074   | 1374 No   | NA    | 0 | 0              | Not-determined  | Genome-fragment | NA    | 0     |
| 59-final-viral-combined_k141_87411   | 1479 No   | NA    | 0 | 0              | Not-determined  | Genome-fragment | NA    | 0     |
| 59-final-viral-combined_k141_13693   | 1017 No   | NA    | 1 | 0              | Low-quality     | Genome-fragment | 2.19  | 0     |
| 59-final-viral-combined_k141_28569   | 2666 No   | NA    | 0 | 0              | Not-determined  | Genome-fragment | NA    | 0     |
| 59-final-viral-combined_k141_119420  | 1633 No   | NA    | 0 | 1              | Not-determined  | Genome-fragment | NA    | 0     |
| 59-final-viral-combined_k141_79301   | 1017 No   | NA    | 1 | 0              | Low-quality     | Genome-fragment | 2.53  | 0     |
| 511-final-viral-combined_k141_89094  | 1017 No   | NA    | 2 | 0              | Low-quality     | Genome-fragment | 2.5   | 0     |
| 51-final-viral-combined_k141_129520  | 1017 No   | NA    | 0 | 0              | Low-quality     | Genome-fragment | 1.55  | 0     |
| 59-final-viral-combined_k141_58127   | 1018 No   | NA    | 0 | 0              | Not-determined  | Genome-fragment | NA    | 0     |
| 59-final-viral-combined_k141_60894   | 3525 No   | NA    | 0 | 1              | Not-determined  | Genome-fragment | NA    | 0     |
| 59-final-viral-combined_k141_92731   | 2954 No   | NA    | 0 | 0              | Not-determined  | Genome-fragment | NA    | 0     |
| 51-final-viral-combined_k141_317633  | 1017 No   | NA    | 2 | 0              | Low-quality     | Genome-fragment | 1.69  | 0     |
| 59-final-viral-combined_k141_98152   | 3335 No   | NA    | 0 | 0              | Not-determined  | Genome-fragment | NA    | 0     |
| 59-final-viral-combined_k141_71209   | 3637 No   | NA    | 0 | 2              | Not-determined  | Genome-fragment | NA    | 0     |
| 59-final-viral-combined_k141_103556  | 1043 No   | NA    | 0 | 0              | Not-determined  | Genome-fragment | NA    | 0     |
| 59-final-viral-combined_k141_33510   | 2110 No   | NA    | 0 | 0              | Not-determined  | Genome-fragment | NA    | 0     |
| 59-final-viral-combined_k141_103559  | 8547 No   | NA    | 0 | 6              | Not-determined  | Genome-fragment | NA    | 0     |
| 59-final-viral-combined_k141_39169   | 4786 No   | NA    | 0 | 1              | Not-determined  | Genome-fragment | NA    | 0     |
| 55-final-viral-combined_k141_17468   | 1017 No   | NA    | 1 | 0              | Low-quality     | Genome-fragment | 1.97  | 0     |
| 57-final-viral-combined_k141_151117  | 1017 No   | NA    | 1 | 0              | Low-quality     | Genome-fragment | 2.58  | 0     |
| 59-final-viral-combined_k141_39183   | 2033 No   | NA    | 0 | 2              | Not-determined  | Genome-fragment | NA    | 1.04  |
|                                      |           |       |   |                |                 |                 |       |       |



|                                      |          |        |     |    |       |    |                |                 |                 |       |       |
|--------------------------------------|----------|--------|-----|----|-------|----|----------------|-----------------|-----------------|-------|-------|
| S7-final-viral-combined_k141_244194  | [full]   | 1018   | No  | NA | 0     | 0  | Low-quality    | Genome-fragment | 0.99            | 0     |       |
| S12-final-viral-combined_k141_1110   | [full]   | 1018   | No  | NA | 0     | 0  | Low-quality    | Genome-fragment | 1.24            | 0     |       |
| S12-final-viral-combined_k141_337148 | [H2gene] | 1018   | No  | NA | 0     | 0  | Low-quality    | Genome-fragment | 6.57            | 0     |       |
| S12-final-viral-combined_k141_321381 | [H2gene] | 1018   | No  | NA | 1     | 0  | Low-quality    | Genome-fragment | 2.2             | 0     |       |
| S12_k141_125931                      |          | 1018   | No  | NA | 1     | 0  | Low-quality    | Genome-fragment | 2.42            | 0     |       |
| S9-final-viral-combined_k141_108599  | [full]   | 2865   | No  | NA | 0     | 0  | Not-determined | Genome-fragment | NA              | 0     |       |
| S4-final-viral-combined_k141_80850   | [full]   | 1018   | No  | NA | 0     | 0  | Low-quality    | Genome-fragment | 2.65            | 0     |       |
| S9-final-viral-combined_k141_82481   | [full]   | 2666   | No  | NA | 0     | 2  | Not-determined | Genome-fragment | NA              | 0     |       |
| S4-final-viral-combined_k141_165078  | [full]   | 1018   | No  | NA | 0     | 0  | Low-quality    | Genome-fragment | 2.25            | 0     |       |
| S9-final-viral-combined_k141_113920  | [full]   | 1257   | No  | NA | 0     | 1  | Not-determined | Genome-fragment | NA              | 0     |       |
| S9-final-viral-combined_k141_18095   | [full]   | 4771   | No  | NA | 0     | 1  | Not-determined | Genome-fragment | NA              | 0     |       |
| S4-final-viral-combined_k141_31960   | [H2gene] | 1018   | No  | NA | 1     | 0  | Low-quality    | Genome-fragment | 3.04            | 0     |       |
| S4_k141_144510                       |          | 1018   | No  | NA | 0     | 0  | Low-quality    | Genome-fragment | 2.38            | 0     |       |
| S6-final-viral-combined_k141_124804  | [full]   | 1018   | No  | NA | 0     | 0  | Low-quality    | Genome-fragment | 0.73            | 0     |       |
| S8_k141_19757                        |          | 1018   | No  | NA | 0     | 0  | Low-quality    | Genome-fragment | 8.15            | 0     |       |
| S9-final-viral-combined_k141_108695  | [full]   | 2308   | No  | NA | 0     | 0  | Not-determined | Genome-fragment | NA              | 0     |       |
| S11-final-viral-combined_k141_22853  | [H2gene] | 1019   | No  | NA | 1     | 0  | Low-quality    | Genome-fragment | 1.33            | 0     |       |
| S1-final-viral-combined_k141_285168  | [full]   | 1019   | No  | NA | 0     | 0  | Low-quality    | Genome-fragment | 2.48            | 0     |       |
| S9-final-viral-combined_k141_23411   | [full]   | 2327   | No  | NA | 0     | 3  | Not-determined | Genome-fragment | NA              | 0     |       |
| S1_k141_17327                        |          | 1019   | No  | NA | 0     | 0  | Low-quality    | Genome-fragment | 1.4             | 0     |       |
| S3-final-viral-combined_k141_51850   | [full]   | 1019   | No  | NA | 1     | 0  | Low-quality    | Genome-fragment | 2.67            | 0     |       |
| S3_k141_47395                        |          | 1019   | No  | NA | 1     | 0  | Low-quality    | Genome-fragment | 2.42            | 0     |       |
| S9-final-viral-combined_k141_18274   | [full]   | 7313   | No  | NA | 0     | 0  | Not-determined | Genome-fragment | NA              | 0     |       |
| S9-final-viral-combined_k141_23447   | [full]   | 1362   | No  | NA | 0     | 0  | Not-determined | Genome-fragment | NA              | 0     |       |
| S9-final-viral-combined_k141_18287   | [full]   | 1543   | No  | NA | 0     | 1  | Not-determined | Genome-fragment | NA              | 0     |       |
| S7-final-viral-combined_k141_36944   | [full]   | 1019   | No  | NA | 0     | 0  | Low-quality    | Genome-fragment | 0.72            | 0     |       |
| S9-final-viral-combined_k141_71406   | [full]   | 2590   | No  | NA | 0     | 1  | Not-determined | Genome-fragment | NA              | 0     |       |
| S9-final-viral-combined_k141_119617  | [full]   | 1249   | No  | NA | 0     | 0  | Not-determined | Genome-fragment | NA              | 0     |       |
| S17-final-viral-combined_k141_121605 | [full]   | 1019   | No  | NA | 0     | 0  | Low-quality    | Genome-fragment | 1.63            | 0     |       |
| S9-final-viral-combined_k141_23467   | [full]   | 3279   | No  | NA | 0     | 3  | Not-determined | Genome-fragment | NA              | 0     |       |
| S12-final-viral-combined_k141_242030 | [full]   | 1019   | No  | NA | 0     | 1  | Low-quality    | Genome-fragment | 0.86            | 0     |       |
| S9-final-viral-combined_k141_113982  | [full]   | 1078   | No  | NA | 0     | 0  | Not-determined | Genome-fragment | NA              | 0     |       |
| S9-final-viral-combined_k141_113997  | [full]   | 1579   | No  | NA | 0     | 0  | Not-determined | Genome-fragment | NA              | 0     |       |
| S9-final-viral-combined_k141_50533   | [full]   | 2206   | No  | NA | 0     | 1  | Not-determined | Genome-fragment | NA              | 0     |       |
| S12-final-viral-combined_k141_362636 | [full]   | 1019   | No  | NA | 0     | 0  | Low-quality    | Genome-fragment | 2.34            | 0     |       |
| S9-final-viral-combined_k141_127717  | [full]   | 1279   | No  | NA | 0     | 0  | Not-determined | Genome-fragment | NA              | 0     |       |
| S12-final-viral-combined_k141_202455 | [H2gene] | 1019   | No  | NA | 1     | 0  | Low-quality    | Genome-fragment | 2.93            | 0     |       |
| S9-final-viral-combined_k141_50568   | [full]   | 2223   | No  | NA | 0     | 2  | Not-determined | Genome-fragment | NA              | 0     |       |
| S9-final-viral-combined_k141_12746   | [full]   | 5276   | No  | NA | 0     | 0  | Not-determined | Genome-fragment | NA              | 0     |       |
| S12_k141_70088                       |          | 1019   | No  | NA | 1     | 0  | Low-quality    | Genome-fragment | 0.55            | 0     |       |
| S9-final-viral-combined_k141_44505   | [full]   | 6443   | No  | NA | 0     | 1  | Not-determined | Genome-fragment | NA              | 0     |       |
| S9-final-viral-combined_k141_23526   | [full]   | 1166   | No  | NA | 0     | 1  | Not-determined | Genome-fragment | NA              | 0     |       |
| S12_k141_63393                       |          | 1019   | No  | NA | 0     | 0  | Low-quality    | Genome-fragment | 1.87            | 0     |       |
| S9-final-viral-combined_k141_124857  | [full]   | 199218 | Yes | NA | 56670 | 20 | 102            | Medium-quality  | Genome-fragment | 65.17 | 71.55 |
| S12_k141_283835                      |          | 1019   | No  | NA | 0     | 2  | Low-quality    | Genome-fragment | 1.23            | 0     |       |
| S9-final-viral-combined_k141_124865  | [full]   | 7139   | No  | NA | 0     | 0  | Not-determined | Genome-fragment | NA              | 0     |       |
| S9-final-viral-combined_k141_55759   | [full]   | 1214   | No  | NA | 0     | 1  | Not-determined | Genome-fragment | NA              | 0     |       |
| S9-final-viral-combined_k141_12802   | [full]   | 1448   | No  | NA | 0     | 2  | Not-determined | Genome-fragment | NA              | 0     |       |
| S2-final-viral-combined_k141_182157  | [full]   | 1019   | No  | NA | 0     | 0  | Low-quality    | Genome-fragment | 1.7             | 0     |       |
| S9-final-viral-combined_k141_124878  | [full]   | 2691   | No  | NA | 0     | 3  | Not-determined | Genome-fragment | NA              | 0     |       |
| S4-final-viral-combined_k141_162829  | [full]   | 1019   | No  | NA | 0     | 0  | Low-quality    | Genome-fragment | 1.72            | 0     |       |
| S9-final-viral-combined_k141_10876   | [full]   | 5138   | No  | NA | 0     | 0  | Not-determined | Genome-fragment | NA              | 0     |       |
| S8-final-viral-combined_k141_243842  | [H2gene] | 1019   | No  | NA | 0     | 0  | Low-quality    | Genome-fragment | 2.54            | 0     |       |
| S9-final-viral-combined_k141_23618   | [full]   | 2897   | No  | NA | 0     | 3  | Not-determined | Genome-fragment | NA              | 0     |       |
| S9-final-viral-combined_k141_82741   | [full]   | 1896   | No  | NA | 0     | 0  | Not-determined | Genome-fragment | NA              | 0     |       |
| S9-final-viral-combined_k141_14547   | [full]   | 1782   | No  | NA | 0     | 0  | Not-determined | Genome-fragment | NA              | 0     |       |
| S8-final-viral-combined_k141_17005   | [H2gene] | 1019   | No  | NA | 1     | 0  | Low-quality    | Genome-fragment | 2.37            | 0     |       |
| S9-final-viral-combined_k141_87838   | [full]   | 1146   | No  | NA | 0     | 0  | Not-determined | Genome-fragment | NA              | 0     |       |
| S8_k141_135478                       |          | 1019   | No  | NA | 2     | 0  | Low-quality    | Genome-fragment | 1.94            | 0     |       |
| S9-final-viral-combined_k141_23622   | [full]   | 2001   | No  | NA | 0     | 1  | Not-determined | Genome-fragment | NA              | 0     |       |
| S11-final-viral-combined_k141_126019 | [full]   | 1020   | No  | NA | 0     | 1  | Low-quality    | Genome-fragment | 1.6             | 0     |       |
| S9-final-viral-combined_k141_87857   | [full]   | 5892   | No  | NA | 0     | 1  | Not-determined | Genome-fragment | NA              | 0     |       |
| S9-final-viral-combined_k141_28805   | [full]   | 59739  | Yes | NA | 35476 | 10 | 11             | Medium-quality  | Genome-fragment | 67.17 | 40.62 |
| S9-final-viral-combined_k141_7880    | [full]   | 4975   | No  | NA | 0     | 5  | Not-determined | Genome-fragment | NA              | 0     |       |
| S11-final-viral-combined_k141_104158 | [H2gene] | 1020   | No  | NA | 0     | 0  | Low-quality    | Genome-fragment | 1.49            | 0     |       |
| S9-final-viral-combined_k141_33812   | [full]   | 1866   | No  | NA | 0     | 1  | Not-determined | Genome-fragment | NA              | 0     |       |
| S9-final-viral-combined_k141_98281   | [full]   | 2342   | No  | NA | 0     | 1  | Not-determined | Genome-fragment | NA              | 0     |       |
| S1-final-viral-combined_k141_109457  | [full]   | 1020   | No  | NA | 0     | 1  | Low-quality    | Genome-fragment | 3.09            | 0     |       |
| S9-final-viral-combined_k141_66432   | [full]   | 1012   | No  | NA | 0     | 0  | Not-determined | Genome-fragment | NA              | 0     |       |
| S5-final-viral-combined_k141_152915  | [H2gene] | 1020   | No  | NA | 1     | 0  | Low-quality    | Genome-fragment | 2.71            | 0     |       |
| S7_k141_95862                        |          | 1020   | No  | NA | 0     | 1  | Low-quality    | Genome-fragment | 1.4             | 0     |       |
| S9-final-viral-combined_k141_82840   | [full]   | 1405   | No  | NA | 0     | 0  | Not-determined | Genome-fragment | NA              | 0     |       |
| S12_k141_6205                        |          | 1020   | No  | NA | 0     | 0  | Low-quality    | Genome-fragment | 2.17            | 0     |       |
| S9-final-viral-combined_k141_66447   | [full]   | 1112   | No  | NA | 0     | 0  | Not-determined | Genome-fragment | NA              | 0     |       |
| S12_k141_211237                      |          | 1020   | No  | NA | 0     | 0  | Low-quality    | Genome-fragment | 2.66            | 0     |       |
| S9-final-viral-combined_k141_93068   | [full]   | 1734   | No  | NA | 0     | 0  | Not-determined | Genome-fragment | NA              | 0     |       |
| S9-final-viral-combined_k141_2765    | [full]   | 11811  | No  | NA | 0     | 6  | Not-determined | Genome-fragment | NA              | 0     |       |
| S2-final-viral-combined_k141_27705   | [full]   | 1020   | No  | NA | 1     | 0  | Low-quality    | Genome-fragment | 0.75            | 0     |       |
| S2_k141_202342                       |          | 1020   | No  | NA | 0     | 0  | Low-quality    | Genome-fragment | 2.43            | 0     |       |
| S4_k141_70502                        |          | 1020   | No  | NA | 0     | 0  | Low-quality    | Genome-fragment | 0.51            | 0     |       |
| S9-final-viral-combined_k141_28888   | [full]   | 2973   | No  | NA | 0     | 1  | Not-determined | Genome-fragment | NA              | 0     |       |
| S8-final-viral-combined_k141_119409  | [H2gene] | 1020   | No  | NA | 0     | 0  | Low-quality    | Genome-fragment | 2.2             | 0     |       |
| S9-final-viral-combined_k141_33875   | [full]   | 1529   | No  | NA | 0     | 1  | Not-determined | Genome-fragment | NA              | 0     |       |
| S9-final-viral-combined_k141_28855   | [full]   | 1949   | No  | NA | 0     | 1  | Not-determined | Genome-fragment | NA              | 0     |       |
| S9-final-viral-combined_k141_119680  | [full]   | 1425   | No  | NA | 0     | 0  | Not-determined | Genome-fragment | NA              | 0     |       |
| S9-final-viral-combined_k141_82431   | [full]   | 1021   | No  | NA | 0     | 1  | Low-quality    | Genome-fragment | 1.03            | 0     |       |
| S9-final-viral-combined_k141_50775   | [full]   | 1502   | No  | NA | 0     | 0  | Not-determined | Genome-fragment | NA              | 0     |       |
| S9-final-viral-combined_k141_125311  | [full]   | 3267   | No  | NA | 0     | 2  | Not-determined | Genome-fragment | NA              | 0     |       |
| S9-final-viral-combined_k141_56764   | [full]   | 1021   | No  | NA | 0     | 0  | Low-quality    | Genome-fragment | 1.98            | 0     |       |
| S11-final-viral-combined_k141_192434 | [H2gene] | 1021   | No  | NA | 1     | 0  | Low-quality    | Genome-fragment | 1.77            | 0     |       |
| S1-final-viral-combined_k141_23530   | [H2gene] | 1021   | No  | NA | 1     | 0  | Low-quality    | Genome-fragment | 1.72            | 0     |       |
| S9-final-viral-combined_k141_24647   | [full]   | 2059   | No  | NA | 0     | 0  | Not-determined | Genome-fragment | NA              | 0     |       |
| S1_k141_112474                       |          | 1021   | No  | NA | 0     | 1  | Low-quality    | Genome-fragment | 0.32            | 0     |       |
| S9-final-viral-combined_k141_88033   | [full]   | 3145   | No  | NA | 0     | 2  | Not-determined | Genome-fragment | NA              | 0     |       |
| S9-final-viral-combined_k141_50813   | [full]   | 1040   | No  | NA | 0     | 0  | Not-determined | Genome-fragment | NA              | 0     |       |
| S3-final-viral-combined_k141_87050   | [full]   | 1021   | No  | NA | 0     | 0  | Low-quality    | Genome-fragment | 1.28            | 0     |       |
| S9-final-viral-combined_k141_119698  | [full]   | 4567   | No  | NA | 0     | 2  | Not-determined | Genome-fragment | NA              | 0     |       |
| S9-final-viral-combined_k141_39731   | [full]   | 1126   | No  | NA | 0     | 0  | Not-determined | Genome-fragment | NA              | 0     |       |
| S9-final-viral-combined_k141_114104  | [full]   | 2800   | No  | NA | 0     | 2  | Not-determined | Genome-fragment | NA              | 0     |       |
| S9-final-viral-combined_k141_119729  | [full]   | 3328   | No  | NA | 0     | 2  | Not-determined | Genome-fragment | NA              | 0     |       |
| S9-final-viral-combined_k141_83057   | [full]   | 5541   | No  | NA | 0     | 5  | Not-determined | Genome-fragment | NA              | 0     |       |
| S9-final-viral-combined_k141_71647   | [full]   | 2390   | No  | NA | 1     | 1  | Medium-quality | Genome-fragment | 55.46           | 0     |       |
| S9-final-viral-combined_k141_18470   | [full]   | 1224   | No  | NA | 0     | 1  | Not-determined | Genome-fragment | NA              | 0     |       |
| S9-final-viral-combined_k141_8026    | [full]   | 2474   | No  | NA | 0     | 0  | Not-determined | Genome-fragment | NA              | 0     |       |
| S9-final-viral-combined_k141_50838   | [full]   | 6286   | No  | NA | 0     | 0  | Not-determined | Genome-fragment | NA              | 0     |       |
| S9-final-viral-combined_k141_8034    | [full]   | 1995   | No  | NA | 0     | 1  | Not-determined | Genome-fragment | NA              | 0     |       |
| S9-final-viral-combined_k141_88107   | [full]   | 2337   | No  | NA | 0     | 2  | Not-determined | Genome-fragment | NA              | 0     |       |
| S17-final-viral-combined_k141_163289 | [full]   | 1021   | No  | NA | 0     | 0  | Low-quality    | Genome-fragment | 2.01            | 0     |       |
| S9-final-viral-combined_k141_66624   | [full]   | 1173   | No  | NA | 0     | 0  | Not-determined | Genome-fragment | NA              | 0     |       |
| S9-final-viral-combined_k141_18502   | [full]   | 1123   | No  | NA | 0     | 1  | Not-determined | Genome-fragment | NA              | 0     |       |
| S9-final-viral-combined_k141_88130   | [full]   | 1685   | No  | NA | 0     | 1  | Not-determined | Genome-fragment | NA              | 0     |       |
| S9-final-viral-combined_k141_18503   | [full]   | 1386   | No  | NA | 0     | 0  | Not-determined | Genome-fragment | NA              | 0     |       |
| S12-final-viral-combined_k141_10219  | [full]   | 1021   | No  | NA | 0     | 0  | Low-quality    | Genome-fragment | 2.41            | 0     |       |
| S9-final-viral-combined_k141_66639   | [full]   | 4830   | No  | NA | 0     | 1  | Not-determined | Genome-fragment | NA              | 0     |       |
| S12_k141_10074                       |          | 1021   | No  | NA | 0     | 0  | Low-quality    | Genome-fragment | 2.6             | 0     |       |
| S2_k141_116060                       |          | 1021   | No  | NA | 2     | 0  | Low-quality    | Genome-fragment | 2.6             | 0     |       |
| S9-final-viral-combined_k141_18555   | [full]   | 3614   | No  | NA | 0     | 3  | Not-determined | Genome-fragment | NA              | 0     |       |
| S9-final-viral-combined_k141_29025   | [full]   | 1227   | No  | NA | 0     | 1  | Not-determined | Genome-fragment | NA              | 0     |       |
| S9-final-viral-combined_k141_56159   | [full]   | 2288   | No  | NA | 0     | 0  | Not-determined | Genome-fragment | NA              | 0     |       |
| S4-final-viral-combined_k141_45340   | [full]   | 1021   | No  | NA | 0     | 0  | Low-quality    | Genome-fragment | 0.7             | 0     |       |
| S8-final-viral-combined_k141_13333   | [full]   | 1021   | No  | NA | 1     | 0  | Low-quality    | Genome-fragment | 0.66            | 0     |       |
| S9-final-viral-combined_k141_83158   | [full]   | 2228   | No  | NA | 0     | 0  | Not-determined | Genome-fragment | NA              | 0     |       |
| S9-final-viral-combined_k141_18579   | [full]   | 1519   | No  | NA | 0     | 1  | Not-determined | Genome-fragment | NA              | 0     |       |
| S8_k141_213008                       |          | 1021   | No  | NA | 0     | 0  | Low-quality    | Genome-fragment | 4.89            | 0     |       |
| S9-final-viral-combined_k141_18601   | [full]   | 1654   | No  | NA | 0     | 1  | Not-determined | Genome-fragment | NA              | 0     |       |
| S9-final-viral-combined_k141_33862   | [H2gene] | 1022   | No  | NA | 1     | 0  | Low-quality    | Genome-fragment | 2.24            | 0     |       |
| S9-final-viral-combined_k141_76914   | [full]   | 2127   | No  | NA | 0     | 0  | Not-determined | Genome-fragment | NA              | 0     |       |
| S9-final-viral-combined_k141_23827   | [full]   | 2849   | No  | NA | 0     | 0  | Not-determined | Genome-fragment | NA              | 0     |       |
| S9-final-viral-combined_k141_2960    | [full]   | 1872   | No  | NA | 0     | 1  | Not-determined | Genome-fragment | NA              | 0     |       |
| S9-final-viral-combined_k141_8095    | [full]   | 5415   | No  | NA | 0     | 1  | Not-determined | Genome-fragment | NA              | 0     |       |
| S9-final-viral-combined_k141_119905  | [full]   | 2428   | No  | NA |       |    |                |                 |                 |       |       |



|                                      |          |       |    |    |   |                |                 |                 |      |   |
|--------------------------------------|----------|-------|----|----|---|----------------|-----------------|-----------------|------|---|
| S9-final-viral-combined_k141_120040  | [full]   | 1487  | No | NA | 0 | 1              | Not-determined  | Genome-fragment | NA   | 0 |
| S1_k141_129549                       |          | 1023  | No | NA | 0 | 0              | Low-quality     | Genome-fragment | 0.66 | 0 |
| S1_k141_195477                       |          | 1023  | No | NA | 0 | 1              | Low-quality     | Genome-fragment | 0.31 | 0 |
| S5-final-viral-combined_k141_39408   | [full]   | 1023  | No | NA | 0 | 0              | Low-quality     | Genome-fragment | 2.14 | 0 |
| S9-final-viral-combined_k141_98520   | [full]   | 1402  | No | NA | 0 | 0              | Not-determined  | Genome-fragment | NA   | 0 |
| S5_k141_238                          |          | 1023  | No | NA | 0 | 1              | Low-quality     | Genome-fragment | 0.53 | 0 |
| S7-final-viral-combined_k141_88405   | [full]   | 1023  | No | NA | 1 | 0              | Low-quality     | Genome-fragment | 2.21 | 0 |
| S17-final-viral-combined_k141_188638 | [full]   | 1023  | No | NA | 0 | 0              | Low-quality     | Genome-fragment | 2.41 | 0 |
| S9-final-viral-combined_k141_24056   | [full]   | 3017  | No | NA | 0 | 1              | Not-determined  | Genome-fragment | NA   | 0 |
| S9-final-viral-combined_k141_13151   | [full]   | 1249  | No | NA | 0 | 1              | Not-determined  | Genome-fragment | NA   | 0 |
| S9-final-viral-combined_k141_21908   | [full]   | 3486  | No | NA | 0 | 5              | Not-determined  | Genome-fragment | NA   | 0 |
| S9-final-viral-combined_k141_23471   | [full]   | 1115  | No | NA | 0 | 1              | Not-determined  | Genome-fragment | NA   | 0 |
| S17-final-viral-combined_k141_32009  | [full]   | 1023  | No | NA | 1 | 0              | Low-quality     | Genome-fragment | 2.75 | 0 |
| S17-final-viral-combined_k141_99708  | [full]   | 1023  | No | NA | 0 | 0              | Low-quality     | Genome-fragment | 1.06 | 0 |
| S9-final-viral-combined_k141_45052   | [full]   | 5219  | No | NA | 0 | 5              | Not-determined  | Genome-fragment | NA   | 0 |
| S2_k141_43142                        |          | 1023  | No | NA | 0 | 0              | Low-quality     | Genome-fragment | 1.59 | 0 |
| S4-final-viral-combined_k141_134748  | [full]   | 1023  | No | NA | 1 | 0              | Low-quality     | Genome-fragment | 1.66 | 0 |
| S9-final-viral-combined_k141_13250   | [full]   | 2950  | No | NA | 0 | 1              | Not-determined  | Genome-fragment | NA   | 0 |
| S9-final-viral-combined_k141_18893   | [full]   | 2592  | No | NA | 0 | 1              | Not-determined  | Genome-fragment | NA   | 0 |
| S9-final-viral-combined_k141_39921   | [full]   | 1353  | No | NA | 0 | 1              | Not-determined  | Genome-fragment | NA   | 0 |
| S9-final-viral-combined_k141_61670   | [full]   | 1314  | No | NA | 0 | 2              | Not-determined  | Genome-fragment | NA   | 0 |
| S9-final-viral-combined_k141_13280   | [full]   | 1198  | No | NA | 2 | 0              | Not-determined  | Genome-fragment | NA   | 0 |
| S9-final-viral-combined_k141_77206   | [full]   | 2522  | No | NA | 0 | 0              | Not-determined  | Genome-fragment | NA   | 0 |
| S9-final-viral-combined_k141_45088   | [full]   | 1498  | No | NA | 0 | 1              | Not-determined  | Genome-fragment | NA   | 0 |
| S9-final-viral-combined_k141_98595   | [full]   | 2015  | No | NA | 0 | 2              | Not-determined  | Genome-fragment | NA   | 0 |
| S4-final-viral-combined_k141_44350   | [full]   | 1023  | No | NA | 0 | 0              | Low-quality     | Genome-fragment | 2.03 | 0 |
| S9-final-viral-combined_k141_18947   | [full]   | 1757  | No | NA | 0 | 0              | Not-determined  | Genome-fragment | NA   | 0 |
| S9-final-viral-combined_k141_109090  | [full]   | 3918  | No | NA | 0 | 4              | Not-determined  | Genome-fragment | NA   | 0 |
| S9-final-viral-combined_k141_13308   | [full]   | 1729  | No | NA | 0 | 0              | Not-determined  | Genome-fragment | NA   | 0 |
| S9-final-viral-combined_k141_45113   | [full]   | 1362  | No | NA | 0 | 0              | Not-determined  | Genome-fragment | NA   | 0 |
| S9-final-viral-combined_k141_8440    | [full]   | 7592  | No | NA | 0 | 1              | Not-determined  | Genome-fragment | NA   | 0 |
| S9-final-viral-combined_k141_13235   | [full]   | 3314  | No | NA | 3 | Not-determined | Genome-fragment | NA              | 0    |   |
| S4-final-viral-combined_k141_156839  | [full]   | 1023  | No | NA | 0 | 2              | Low-quality     | Genome-fragment | 0.56 | 0 |
| S4_k141_114656                       |          | 1023  | No | NA | 2 | 0              | Low-quality     | Genome-fragment | 1.46 | 0 |
| S6-final-viral-combined_k141_82446   | [full]   | 1023  | No | NA | 0 | 0              | Low-quality     | Genome-fragment | 0.95 | 0 |
| S8-final-viral-combined_k141_20976   | [full]   | 1023  | No | NA | 0 | 0              | Low-quality     | Genome-fragment | 2.3  | 0 |
| S8_k141_173869                       |          | 1023  | No | NA | 0 | 0              | Low-quality     | Genome-fragment | 2.01 | 0 |
| S9-final-viral-combined_k141_88795   | [full]   | 1024  | No | NA | 1 | 0              | Low-quality     | Genome-fragment | 1.27 | 0 |
| S9_k141_53384                        |          | 1024  | No | NA | 2 | 0              | Low-quality     | Genome-fragment | 2.66 | 0 |
| S11-final-viral-combined_k141_294408 | [full]   | 1024  | No | NA | 1 | 0              | Low-quality     | Genome-fragment | 1.04 | 0 |
| S11_k141_225185                      |          | 1024  | No | NA | 0 | 1              | Low-quality     | Genome-fragment | 0.44 | 0 |
| S1-final-viral-combined_k141_247126  | [full]   | 1024  | No | NA | 0 | 0              | Low-quality     | Genome-fragment | 1.73 | 0 |
| S9-final-viral-combined_k141_51131   | [full]   | 1876  | No | NA | 0 | 1              | Not-determined  | Genome-fragment | NA   | 0 |
| S3-final-viral-combined_k141_112598  | [H2gene] | 1024  | No | NA | 1 | 0              | Low-quality     | Genome-fragment | 2.45 | 0 |
| S9-final-viral-combined_k141_125354  | [full]   | 1849  | No | NA | 1 | 1              | Not-determined  | Genome-fragment | NA   | 0 |
| S3-final-viral-combined_k141_136988  | [H2gene] | 1024  | No | NA | 0 | 0              | Low-quality     | Genome-fragment | 2.6  | 0 |
| S5-final-viral-combined_k141_4356    | [full]   | 1024  | No | NA | 0 | 0              | Low-quality     | Genome-fragment | 1.76 | 0 |
| S9-final-viral-combined_k141_77343   | [full]   | 1293  | No | NA | 0 | 2              | Not-determined  | Genome-fragment | NA   | 0 |
| S9-final-viral-combined_k141_719713  | [full]   | 294   | No | NA | 0 | 2              | Not-determined  | Genome-fragment | NA   | 0 |
| S5-final-viral-combined_k141_92790   | [full]   | 1024  | No | NA | 1 | 0              | Low-quality     | Genome-fragment | 2.2  | 0 |
| S9-final-viral-combined_k141_45238   | [full]   | 2265  | No | NA | 0 | 2              | Not-determined  | Genome-fragment | NA   | 0 |
| S5-final-viral-combined_k141_407159  | [full]   | 1024  | No | NA | 1 | 0              | Low-quality     | Genome-fragment | 0.99 | 0 |
| S9-final-viral-combined_k141_77355   | [full]   | 5721  | No | NA | 0 | 0              | Not-determined  | Genome-fragment | NA   | 0 |
| S9-final-viral-combined_k141_8506    | [full]   | 2385  | No | NA | 0 | 1              | Not-determined  | Genome-fragment | NA   | 0 |
| S9-final-viral-combined_k141_66722   | [full]   | 1491  | No | NA | 0 | 1              | Not-determined  | Genome-fragment | NA   | 0 |
| S5-final-viral-combined_k141_69336   | [H2gene] | 1024  | No | NA | 1 | 0              | Low-quality     | Genome-fragment | 0.63 | 0 |
| S17-final-viral-combined_k141_207471 | [full]   | 1024  | No | NA | 2 | 0              | Low-quality     | Genome-fragment | 1.81 | 0 |
| S9-final-viral-combined_k141_8514    | [full]   | 2468  | No | NA | 0 | 3              | Not-determined  | Genome-fragment | NA   | 0 |
| S17-final-viral-combined_k141_125690 | [H2gene] | 1024  | No | NA | 0 | 0              | Low-quality     | Genome-fragment | 2.33 | 0 |
| S9-final-viral-combined_k141_56467   | [full]   | 2131  | No | NA | 0 | 0              | Not-determined  | Genome-fragment | NA   | 0 |
| S17-k141_111422                      |          | 1024  | No | NA | 0 | 0              | Low-quality     | Genome-fragment | 3.52 | 0 |
| S12-final-viral-combined_k141_149637 | [H2gene] | 1024  | No | NA | 0 | 2              | Low-quality     | Genome-fragment | 1.1  | 0 |
| S9-final-viral-combined_k141_45266   | [full]   | 2688  | No | NA | 0 | 2              | Not-determined  | Genome-fragment | NA   | 0 |
| S9-final-viral-combined_k141_13390   | [full]   | 5225  | No | NA | 0 | 4              | Not-determined  | Genome-fragment | NA   | 0 |
| S9-final-viral-combined_k141_66758   | [full]   | 2204  | No | NA | 0 | 2              | Not-determined  | Genome-fragment | NA   | 0 |
| S12_k141_374763                      |          | 1024  | No | NA | 1 | 0              | Low-quality     | Genome-fragment | 3.03 | 0 |
| S9-final-viral-combined_k141_61819   | [full]   | 2252  | No | NA | 0 | 0              | Not-determined  | Genome-fragment | NA   | 0 |
| S4-final-viral-combined_k141_152675  | [full]   | 1024  | No | NA | 0 | 1              | Low-quality     | Genome-fragment | 2.06 | 0 |
| S4_k141_50719                        |          | 1024  | No | NA | 0 | 0              | Low-quality     | Genome-fragment | 2.18 | 0 |
| S8-final-viral-combined_k141_53162   | [full]   | 1024  | No | NA | 0 | 1              | Low-quality     | Genome-fragment | 0.77 | 0 |
| S8_k141_82387                        |          | 1024  | No | NA | 0 | 0              | Not-determined  | Genome-fragment | NA   | 0 |
| S9-final-viral-combined_k141_13432   | [full]   | 3168  | No | NA | 0 | 1              | Not-determined  | Genome-fragment | NA   | 0 |
| S9-final-viral-combined_k141_93538   | [full]   | 1091  | No | NA | 0 | 1              | Not-determined  | Genome-fragment | NA   | 0 |
| S9-final-viral-combined_k141_77412   | [full]   | 1525  | No | NA | 0 | 0              | Not-determined  | Genome-fragment | NA   | 0 |
| S9-final-viral-combined_k141_99856   | [full]   | 1025  | No | NA | 0 | 0              | Low-quality     | Genome-fragment | 2.22 | 0 |
| S9-final-viral-combined_k141_47584   | [full]   | 1025  | No | NA | 0 | 1              | Low-quality     | Genome-fragment | 0.79 | 0 |
| S9-final-viral-combined_k141_19081   | [full]   | 2596  | No | NA | 0 | 1              | Not-determined  | Genome-fragment | NA   | 0 |
| S9-final-viral-combined_k141_68822   | [full]   | 2123  | No | NA | 0 | 1              | Not-determined  | Genome-fragment | NA   | 0 |
| S11-final-viral-combined_k141_235062 | [full]   | 1025  | No | NA | 0 | 0              | Low-quality     | Genome-fragment | 1.79 | 0 |
| S9-final-viral-combined_k141_29350   | [full]   | 1174  | No | NA | 0 | 2              | Not-determined  | Genome-fragment | NA   | 0 |
| S9-final-viral-combined_k141_39553   | [full]   | 3376  | No | NA | 0 | 3              | Not-determined  | Genome-fragment | NA   | 0 |
| S11-final-viral-combined_k141_180500 | [full]   | 1025  | No | NA | 0 | 0              | Low-quality     | Genome-fragment | 2.41 | 0 |
| S9-final-viral-combined_k141_39556   | [full]   | 1847  | No | NA | 0 | 2              | Not-determined  | Genome-fragment | NA   | 0 |
| S9-final-viral-combined_k141_24316   | [full]   | 1096  | No | NA | 0 | 0              | Not-determined  | Genome-fragment | NA   | 0 |
| S9-final-viral-combined_k141_2310    | [full]   | 2124  | No | NA | 0 | 2              | Not-determined  | Genome-fragment | NA   | 0 |
| S1-final-viral-combined_k141_162810  | [full]   | 1025  | No | NA | 1 | 0              | Low-quality     | Genome-fragment | 1.9  | 0 |
| S3-final-viral-combined_k141_15604   | [full]   | 1025  | No | NA | 0 | 0              | Low-quality     | Genome-fragment | 1.64 | 0 |
| S9-final-viral-combined_k141_29383   | [full]   | 1617  | No | NA | 0 | 1              | Not-determined  | Genome-fragment | NA   | 0 |
| S9-final-viral-combined_k141_156507  | [full]   | 2455  | No | NA | 0 | 2              | Not-determined  | Genome-fragment | NA   | 0 |
| S9-final-viral-combined_k141_2323    | [full]   | 1003  | No | NA | 0 | 0              | Not-determined  | Genome-fragment | NA   | 0 |
| S9-final-viral-combined_k141_77472   | [full]   | 2144  | No | NA | 0 | 3              | Not-determined  | Genome-fragment | NA   | 0 |
| S5-final-viral-combined_k141_78822   | [H2gene] | 1025  | No | NA | 0 | 0              | Low-quality     | Genome-fragment | 2.16 | 0 |
| S9-final-viral-combined_k141_3241    | [full]   | 1726  | No | NA | 0 | 0              | Not-determined  | Genome-fragment | NA   | 0 |
| S9-final-viral-combined_k141_109158  | [full]   | 1410  | No | NA | 0 | 2              | Not-determined  | Genome-fragment | NA   | 0 |
| S9-final-viral-combined_k141_38836   | [full]   | 8992  | No | NA | 0 | 0              | Not-determined  | Genome-fragment | NA   | 0 |
| S7-final-viral-combined_k141_196100  | [full]   | 1025  | No | NA | 1 | 0              | Low-quality     | Genome-fragment | 1.98 | 0 |
| S9-final-viral-combined_k141_83693   | [full]   | 1497  | No | NA | 0 | 0              | Not-determined  | Genome-fragment | NA   | 0 |
| S9-final-viral-combined_k141_68986   | [full]   | 1651  | No | NA | 0 | 0              | Not-determined  | Genome-fragment | NA   | 0 |
| S9-final-viral-combined_k141_77512   | [full]   | 2054  | No | NA | 0 | 2              | Not-determined  | Genome-fragment | NA   | 0 |
| S17-final-viral-combined_k141_228466 | [full]   | 1025  | No | NA | 0 | 0              | Low-quality     | Genome-fragment | 1.41 | 0 |
| S9-final-viral-combined_k141_24618   | [full]   | 1260  | No | NA | 0 | 1              | Not-determined  | Genome-fragment | NA   | 0 |
| S9-final-viral-combined_k141_402277  | [full]   | 14586 | No | NA | 0 | 2              | Not-determined  | Genome-fragment | NA   | 0 |
| S9-final-viral-combined_k141_114849  | [full]   | 1294  | No | NA | 0 | 0              | Not-determined  | Genome-fragment | NA   | 0 |
| S9-final-viral-combined_k141_45423   | [full]   | 2317  | No | NA | 0 | 2              | Not-determined  | Genome-fragment | NA   | 0 |
| S12-final-viral-combined_k141_93966  | [full]   | 1025  | No | NA | 0 | 1              | Low-quality     | Genome-fragment | 0.66 | 0 |
| S12-final-viral-combined_k141_65288  | [full]   | 1025  | No | NA | 1 | 0              | Low-quality     | Genome-fragment | 2.79 | 0 |
| S12_k141_344875                      |          | 1025  | No | NA | 0 | 0              | Low-quality     | Genome-fragment | 0.2  | 0 |
| S2-final-viral-combined_k141_127476  | [full]   | 1025  | No | NA | 0 | 2              | Low-quality     | Genome-fragment | 0.48 | 0 |
| S9-final-viral-combined_k141_40235   | [full]   | 2612  | No | NA | 0 | 2              | Not-determined  | Genome-fragment | NA   | 0 |
| S9-final-viral-combined_k141_40244   | [full]   | 1779  | No | NA | 0 | 0              | Not-determined  | Genome-fragment | NA   | 0 |
| S4_k141_24006                        |          | 1025  | No | NA | 1 | 0              | Low-quality     | Genome-fragment | 0.51 | 0 |
| S9-final-viral-combined_k141_114890  | [full]   | 1523  | No | NA | 0 | 1              | Not-determined  | Genome-fragment | NA   | 0 |
| S9-final-viral-combined_k141_56665   | [full]   | 1414  | No | NA | 0 | 2              | Not-determined  | Genome-fragment | NA   | 0 |
| S4_k141_143268                       |          | 1025  | No | NA | 0 | 0              | Low-quality     | Genome-fragment | 1.85 | 0 |
| S9-final-viral-combined_k141_72175   | [full]   | 2340  | No | NA | 0 | 0              | Not-determined  | Genome-fragment | NA   | 0 |
| S4_k141_53134                        |          | 1025  | No | NA | 0 | 1              | Low-quality     | Genome-fragment | 2.34 | 0 |
| S8-final-viral-combined_k141_26172   | [full]   | 1025  | No | NA | 2 | 0              | Low-quality     | Genome-fragment | 2.73 | 0 |
| S8-final-viral-combined_k141_189837  | [full]   | 1025  | No | NA | 0 | 0              | Low-quality     | Genome-fragment | 0.67 | 0 |
| S9-final-viral-combined_k141_66940   | [full]   | 4728  | No | NA | 0 | 4              | Not-determined  | Genome-fragment | NA   | 0 |
| S9-final-viral-combined_k141_56741   | [full]   | 1329  | No | NA | 0 | 1              | Not-determined  | Genome-fragment | NA   | 0 |
| S8_k141_204889                       |          | 1025  | No | NA | 1 | 0              | Low-quality     | Genome-fragment | 1.82 | 0 |
| S9-final-viral-combined_k141_8611    | [full]   | 5725  | No | NA | 0 | 2              | Not-determined  | Genome-fragment | NA   | 0 |
| S9-final-viral-combined_k141_56720   | [full]   | 2613  | No | NA | 0 | 3              | Not-determined  | Genome-fragment | NA   | 0 |
| S11_k141_112816                      |          | 1026  | No | NA | 0 | 0              | Low-quality     | Genome-fragment | 2.54 | 0 |
| S9-final-viral-combined_k141_51266   | [full]   | 2680  | No | NA | 0 | 1              | Not-determined  | Genome-fragment | NA   | 0 |
| S1-final-viral-combined_k141_22904   | [full]   | 1026  | No | NA | 2 | 0              | Low-quality     | Genome-fragment | 1.75 | 0 |
| S1-final-viral-combined_k141_72382   | [full]   | 1026  | No | NA | 0 | 0              | Low-quality     | Genome-fragment | 0.8  | 0 |
| S9-final-viral-combined_k141_86531   | [full]   | 1076  | No | NA | 0 | 1              | Not-determined  | Genome-fragment | NA   | 0 |
| S1-final-viral-combined_k141_393408  | [full]   | 1026  | No | NA | 1 | 0              | Low-quality     | Genome-fragment | 2.31 | 0 |
| S9-final-viral-combined_k141_98965   | [full]   | 3473  | No | NA | 0 | 1              | Not-determined  | Genome-fragment | NA   | 0 |
| S7_k141_178289                       |          | 1026  | No | NA | 0 | 0              | Low-quality     | Genome-fragment | 2.25 | 0 |
| S17-final-viral-combined_k141_203145 | [        |       |    |    |   |                |                 |                 |      |   |



|                                       |          |        |     |    |       |    |                  |                 |              |       |       |
|---------------------------------------|----------|--------|-----|----|-------|----|------------------|-----------------|--------------|-------|-------|
| 59-final-viral-combined_k141_1207271  | [full]   | 2149   | No  | NA | 0     | 3  | Not-determined   | Genome-fragment | NA           |       | 0     |
| 57-final-viral-combined_k141_1745331  | [H2gene] | 1027   | No  | NA | 1     | 0  | Low-quality      | Genome-fragment | NA           | 19.49 | 0     |
| 59-final-viral-combined_k141_403591   | [full]   | 1336   | No  | NA | 0     | 0  | Not-determined   | Genome-fragment | NA           |       | 0     |
| 59-final-viral-combined_k141_349451   | [full]   | 1067   | No  | NA | 0     | 1  | Not-determined   | Genome-fragment | NA           |       | 0     |
| 59-final-viral-combined_k141_568221   | [full]   | 1481   | No  | NA | 0     | 3  | Not-determined   | Genome-fragment | NA           |       | 0     |
| 517-final-viral-combined_k141_937191  | [full]   | 1027   | No  | NA | 0     | 0  | Low-quality      | Genome-fragment | NA           | 0.18  | 0     |
| 517-k141_184406                       |          | 1027   | No  | NA | 0     | 1  | Low-quality      | Genome-fragment | NA           |       | 0     |
| 59-final-viral-combined_k141_885831   | [full]   | 2498   | No  | NA | 0     | 0  | Not-determined   | Genome-fragment | NA           |       | 0     |
| 59-final-viral-combined_k141_514841   | [full]   | 1418   | No  | NA | 0     | 0  | Not-determined   | Genome-fragment | NA           |       | 0     |
| 59-final-viral-combined_k141_885981   | [full]   | 2114   | No  | NA | 0     | 0  | Not-determined   | Genome-fragment | NA           |       | 0     |
| 59-final-viral-combined_k141_568551   | [full]   | 2339   | No  | NA | 0     | 0  | 1 Not-determined | Genome-fragment | NA           |       | 0     |
| 59-final-viral-combined_k141_777961   | [full]   | 1479   | No  | NA | 0     | 1  | Not-determined   | Genome-fragment | NA           |       | 0     |
| 517-k141_208747                       |          | 1027   | No  | NA | 0     | 1  | Low-quality      | Genome-fragment | NA           | 1.27  | 0     |
| 59-final-viral-combined_k141_886321   | [full]   | 1130   | No  | NA | 0     | 1  | Not-determined   | Genome-fragment | NA           |       | 0     |
| 59-final-viral-combined_k141_1093221  | [full]   | 103451 | Yes | NA | 43439 | 27 | 51               | High-quality    | High-quality | 100   | 58.01 |
| 59-final-viral-combined_k141_534581   | [full]   | 2552   | No  | NA | 0     | 0  | Not-determined   | Genome-fragment | NA           | 0     |       |
| 59-final-viral-combined_k141_1257121  | [full]   | 5977   | No  | NA | 0     | 1  | Not-determined   | Genome-fragment | NA           |       | 0     |
| 512-final-viral-combined_k141_714891  | [full]   | 1027   | No  | NA | 2     | 0  | Low-quality      | Genome-fragment | NA           | 3.06  | 0     |
| 512-final-viral-combined_k141_2101561 | [full]   | 1027   | No  | NA | 0     | 0  | Low-quality      | Genome-fragment | NA           | 2.88  | 0     |
| 512-final-viral-combined_k141_3630561 | [full]   | 1027   | No  | NA | 0     | 2  | Low-quality      | Genome-fragment | NA           | 1.15  | 0     |
| 59-final-viral-combined_k141_403921   | [full]   | 2220   | No  | NA | 0     | 1  | Not-determined   | Genome-fragment | NA           |       | 0     |
| 59-final-viral-combined_k141_1207911  | [full]   | 1723   | No  | NA | 0     | 0  | Not-determined   | Genome-fragment | NA           |       | 0     |
| 512_k141_339725                       |          | 1027   | No  | NA | 0     | 0  | Low-quality      | Genome-fragment | NA           | 2.42  | 0     |
| 52-final-viral-combined_k141_294161   | [full]   | 1027   | No  | NA | 0     | 2  | Low-quality      | Genome-fragment | NA           | 2.11  | 0     |
| 52_k141_10566                         |          | 1027   | No  | NA | 0     | 0  | Low-quality      | Genome-fragment | NA           | 0.75  | 0     |
| 52_k141_27931                         |          | 1027   | No  | NA | 0     | 0  | Low-quality      | Genome-fragment | NA           | 2.36  | 0     |
| 52_k141_78766                         |          | 1027   | No  | NA | 1     | 0  | Low-quality      | Genome-fragment | NA           | 1.33  | 0     |
| 59-final-viral-combined_k141_1208031  | [full]   | 1225   | No  | NA | 0     | 1  | Not-determined   | Genome-fragment | NA           |       | 0     |
| 59-final-viral-combined_k141_137471   | [H2gene] | 1027   | No  | NA | 0     | 0  | Low-quality      | Genome-fragment | NA           | 2.43  | 0     |
| 59-final-viral-combined_k141_278531   | [full]   | 1028   | No  | NA | 0     | 0  | Low-quality      | Genome-fragment | NA           | 1.64  | 0     |
| 59-final-viral-combined_k141_1137201  | [full]   | 1028   | No  | NA | 0     | 0  | Low-quality      | Genome-fragment | NA           | 2.02  | 0     |
| 59-final-viral-combined_k141_1155081  | [full]   | 2297   | No  | NA | 2     | 2  | Not-determined   | Genome-fragment | NA           |       | 0     |
| 59-final-viral-combined_k141_1155491  | [full]   | 1028   | No  | NA | 1     | 0  | Low-quality      | Genome-fragment | NA           | 0.51  | 0     |
| 59-final-viral-combined_k141_1044751  | [full]   | 3636   | No  | NA | 0     | 2  | Not-determined   | Genome-fragment | NA           |       | 0     |
| 59-final-viral-combined_k141_350451   | [full]   | 2116   | No  | NA | 0     | 2  | Not-determined   | Genome-fragment | NA           |       | 0     |
| 51-final-viral-combined_k141_1247311  | [full]   | 1028   | No  | NA | 0     | 0  | Low-quality      | Genome-fragment | NA           | 1.44  | 0     |
| 53-final-viral-combined_k141_1025621  | [full]   | 1028   | No  | NA | 1     | 0  | Low-quality      | Genome-fragment | NA           | 2.25  | 0     |
| 55-final-viral-combined_k141_1612341  | [full]   | 1028   | No  | NA | 1     | 0  | Low-quality      | Genome-fragment | NA           | 0.8   | 0     |
| 55-final-viral-combined_k141_1096461  | [full]   | 1028   | No  | NA | 0     | 0  | Low-quality      | Genome-fragment | NA           | 3.01  | 0     |
| 59-final-viral-combined_k141_1208241  | [full]   | 1374   | No  | NA | 0     | 2  | Not-determined   | Genome-fragment | NA           |       | 0     |
| 55-final-viral-combined_k141_829891   | [H2gene] | 1028   | No  | NA | 1     | 0  | Low-quality      | Genome-fragment | NA           | 25.27 | 0     |
| 59-final-viral-combined_k141_516041   | [full]   | 2810   | No  | NA | 0     | 1  | Not-determined   | Genome-fragment | NA           |       | 0     |
| 59-final-viral-combined_k141_778441   | [full]   | 2883   | No  | NA | 0     | 1  | Not-determined   | Genome-fragment | NA           |       | 0     |
| 59-final-viral-combined_k141_570101   | [full]   | 2456   | No  | NA | 0     | 1  | Not-determined   | Genome-fragment | NA           |       | 0     |
| 59-final-viral-combined_k141_19441    | [full]   | 3623   | No  | NA | 0     | 2  | Not-determined   | Genome-fragment | NA           |       | 0     |
| 57-final-viral-combined_k141_2425281  | [full]   | 1028   | No  | NA | 0     | 0  | Low-quality      | Genome-fragment | NA           | 2.03  | 0     |
| 59-final-viral-combined_k141_246511   | [full]   | 2147   | No  | NA | 0     | 2  | Not-determined   | Genome-fragment | NA           |       | 0     |
| 59-final-viral-combined_k141_592551   | [full]   | 1762   | No  | NA | 0     | 2  | Not-determined   | Genome-fragment | NA           |       | 0     |
| 59-final-viral-combined_k141_246571   | [full]   | 1612   | No  | NA | 0     | 2  | Not-determined   | Genome-fragment | NA           |       | 0     |
| 59-final-viral-combined_k141_570261   | [full]   | 3537   | No  | NA | 0     | 0  | Not-determined   | Genome-fragment | NA           |       | 0     |
| 59-final-viral-combined_k141_778681   | [full]   | 4251   | No  | NA | 0     | 1  | Not-determined   | Genome-fragment | NA           |       | 0     |
| 59-final-viral-combined_k141_246651   | [full]   | 2066   | No  | NA | 0     | 0  | Not-determined   | Genome-fragment | NA           |       | 0     |
| 57-final-viral-combined_k141_311181   | [H2gene] | 1028   | No  | NA | 1     | 0  | Low-quality      | Genome-fragment | NA           | 2.31  | 0     |
| 517-k141_139020                       |          | 1028   | No  | NA | 0     | 0  | Low-quality      | Genome-fragment | NA           | 0.67  | 0     |
| 59-final-viral-combined_k141_35161    | [full]   | 1990   | No  | NA | 0     | 2  | Not-determined   | Genome-fragment | NA           |       | 0     |
| 512-final-viral-combined_k141_3727881 | [full]   | 1028   | No  | NA | 0     | 0  | Low-quality      | Genome-fragment | NA           | 1.22  | 0     |
| 59-final-viral-combined_k141_457641   | [full]   | 2367   | No  | NA | 0     | 2  | Not-determined   | Genome-fragment | NA           |       | 0     |
| 59-final-viral-combined_k141_622601   | [full]   | 1635   | No  | NA | 0     | 0  | Not-determined   | Genome-fragment | NA           |       | 0     |
| 59-final-viral-combined_k141_34631    | [full]   | 4172   | No  | NA | 10    | 0  | High-quality     | High-quality    | NA           | 100   | 0     |
| 59-final-viral-combined_k141_88911    | [full]   | 1815   | No  | NA | 0     | 2  | Not-determined   | Genome-fragment | NA           |       | 0     |
| 512-final-viral-combined_k141_2117941 | [full]   | 1028   | No  | NA | 0     | 0  | Low-quality      | Genome-fragment | NA           | 2.03  | 0     |
| 512_k141_258913                       |          | 1028   | No  | NA | 0     | 0  | Low-quality      | Genome-fragment | NA           | 2.26  | 0     |
| 52-final-viral-combined_k141_1968691  | [full]   | 1028   | No  | NA | 0     | 2  | Low-quality      | Genome-fragment | NA           | 0.34  | 0     |
| 59-final-viral-combined_k141_457851   | [full]   | 1210   | No  | NA | 0     | 1  | Not-determined   | Genome-fragment | NA           |       | 0     |
| 59-final-viral-combined_k141_405171   | [full]   | 1605   | No  | NA | 0     | 2  | Not-determined   | Genome-fragment | NA           |       | 0     |
| 52-final-viral-combined_k141_869091   | [full]   | 1028   | No  | NA | 2     | 0  | Low-quality      | Genome-fragment | NA           | 2.38  | 0     |
| 52-final-viral-combined_k141_2218081  | [H2gene] | 1028   | No  | NA | 1     | 0  | Low-quality      | Genome-fragment | NA           | 0.71  | 0     |
| 54-final-viral-combined_k141_820601   | [full]   | 1028   | No  | NA | 0     | 0  | Low-quality      | Genome-fragment | NA           | 0.84  | 0     |
| 59-final-viral-combined_k141_31391    | [full]   | 1441   | No  | NA | 0     | 0  | Not-determined   | Genome-fragment | NA           |       | 0     |
| 58-final-viral-combined_k141_2322201  | [full]   | 1028   | No  | NA | 1     | 0  | Low-quality      | Genome-fragment | NA           | 1.12  | 0     |
| 59-final-viral-combined_k141_1209761  | [full]   | 2890   | No  | NA | 0     | 2  | Not-determined   | Genome-fragment | NA           |       | 0     |
| 58_k141_253371                        |          | 1028   | No  | NA | 0     | 1  | Low-quality      | Genome-fragment | NA           | 1.06  | 0     |
| 59-final-viral-combined_k141_572081   | [full]   | 2046   | No  | NA | 0     | 0  | Not-determined   | Genome-fragment | NA           |       | 0     |
| 511-final-viral-combined_k141_102371  | [full]   | 1029   | No  | NA | 0     | 0  | Low-quality      | Genome-fragment | NA           | 2.94  | 0     |
| 59-final-viral-combined_k141_352481   | [full]   | 11465  | No  | NA | 0     | 4  | Not-determined   | Genome-fragment | NA           |       | 0     |
| 511-final-viral-combined_k141_2989461 | [full]   | 1029   | No  | NA | 1     | 0  | Low-quality      | Genome-fragment | NA           | 1.67  | 0     |
| 59-final-viral-combined_k141_1152231  | [full]   | 1858   | No  | NA | 0     | 1  | Not-determined   | Genome-fragment | NA           |       | 0     |
| 59-final-viral-combined_k141_78061    | [full]   | 7183   | No  | NA | 0     | 1  | Not-determined   | Genome-fragment | NA           |       | 0     |
| 511_k141_154141                       |          | 1029   | No  | NA | 0     | 1  | Low-quality      | Genome-fragment | NA           | 0.26  | 0     |
| 59-final-viral-combined_k141_780211   | [full]   | 7287   | No  | NA | 0     | 7  | Not-determined   | Genome-fragment | NA           |       | 0     |
| 59-final-viral-combined_k141_210491   | [full]   | 1004   | No  | NA | 0     | 1  | Not-determined   | Genome-fragment | NA           |       | 0     |
| 59-final-viral-combined_k141_672761   | [full]   | 6819   | No  | NA | 0     | 4  | Not-determined   | Genome-fragment | NA           |       | 0     |
| 511_k141_216465                       |          | 1029   | No  | NA | 0     | 1  | Low-quality      | Genome-fragment | NA           | 0.36  | 0     |
| 51-final-viral-combined_k141_1162161  | [full]   | 1029   | No  | NA | 0     | 0  | Low-quality      | Genome-fragment | NA           | 2.6   | 0     |
| 59-final-viral-combined_k141_2159891  | [full]   | 3298   | No  | NA | 0     | 2  | Not-determined   | Genome-fragment | NA           |       | 0     |
| 51-final-viral-combined_k141_3028961  | [full]   | 1029   | No  | NA | 0     | 0  | Low-quality      | Genome-fragment | NA           | 2.24  | 0     |
| 59-final-viral-combined_k141_405441   | [full]   | 5484   | No  | NA | 0     | 6  | Not-determined   | Genome-fragment | NA           |       | 0     |
| 51-final-viral-combined_k141_1883841  | [full]   | 1029   | No  | NA | 1     | 0  | Low-quality      | Genome-fragment | NA           | 2.8   | 0     |
| 55-final-viral-combined_k141_108191   | [full]   | 1029   | No  | NA | 0     | 0  | Low-quality      | Genome-fragment | NA           | 2.05  | 0     |
| 59-final-viral-combined_k141_296111   | [full]   | 413955 | Yes | NA | 96620 | 35 | 266              | Complete        | High-quality | 100   | 76.66 |
| 59-final-viral-combined_k141_624011   | [full]   | 2470   | No  | NA | 0     | 2  | Not-determined   | Genome-fragment | NA           |       | 0     |
| 59-final-viral-combined_k141_346091   | [full]   | 1186   | No  | NA | 0     | 0  | Not-determined   | Genome-fragment | NA           |       | 0     |
| 59-final-viral-combined_k141_624101   | [full]   | 2661   | No  | NA | 0     | 0  | Not-determined   | Genome-fragment | NA           |       | 0     |
| 59-final-viral-combined_k141_296451   | [full]   | 3055   | No  | NA | 0     | 3  | Not-determined   | Genome-fragment | NA           | 2.65  | 0     |
| 55-final-viral-combined_k141_1249951  | [H2gene] | 1029   | No  | NA | 0     | 0  | Low-quality      | Genome-fragment | NA           | 2.25  | 0     |
| 55-final-viral-combined_k141_1985221  | [H2gene] | 1029   | No  | NA | 2     | 0  | Low-quality      | Genome-fragment | NA           |       | 0     |
| 59-final-viral-combined_k141_296641   | [full]   | 1679   | No  | NA | 0     | 0  | Not-determined   | Genome-fragment | NA           |       | 0     |
| 57-final-viral-combined_k141_1308631  | [full]   | 1029   | No  | NA | 1     | 0  | Low-quality      | Genome-fragment | NA           | 2.34  | 0     |
| 59-final-viral-combined_k141_518491   | [full]   | 2462   | No  | NA | 0     | 1  | Not-determined   | Genome-fragment | NA           |       | 0     |
| 59-final-viral-combined_k141_994831   | [full]   | 1502   | No  | NA | 0     | 2  | Not-determined   | Genome-fragment | NA           |       | 0     |
| 517-k141_254135                       |          | 1029   | No  | NA | 0     | 0  | Low-quality      | Genome-fragment | NA           | 1.72  | 0     |
| 59-final-viral-combined_k141_519561   | [full]   | 2782   | No  | NA | 0     | 2  | Not-determined   | Genome-fragment | NA           |       | 0     |
| 512-final-viral-combined_k141_23491   | [full]   | 1029   | No  | NA | 0     | 1  | Low-quality      | Genome-fragment | NA           | 1.62  | 0     |
| 59-final-viral-combined_k141_388031   | [H2gene] | 3089   | No  | NA | 0     | 4  | Not-determined   | Genome-fragment | NA           |       | 0     |
| 512-final-viral-combined_k141_388031  | [H2gene] | 1029   | No  | NA | 0     | 0  | Low-quality      | Genome-fragment | NA           | 0.92  | 0     |
| 59-final-viral-combined_k141_405871   | [full]   | 1997   | No  | NA | 1     | 0  | Not-determined   | Genome-fragment | NA           |       | 0     |
| 512-final-viral-combined_k141_926091  | [H2gene] | 1029   | No  | NA | 1     | 0  | Low-quality      | Genome-fragment | NA           | 2.58  | 0     |
| 59-final-viral-combined_k141_573771   | [full]   | 2098   | No  | NA | 0     | 2  | Not-determined   | Genome-fragment | NA           |       | 0     |
| 59-final-viral-combined_k141_1095881  | [full]   | 1246   | No  | NA | 0     | 1  | Not-determined   | Genome-fragment | NA           |       | 0     |
| 59-final-viral-combined_k141_197281   | [full]   | 4612   | No  | NA | 0     | 2  | Not-determined   | Genome-fragment | NA           |       | 0     |
| 512_k141_208204                       |          | 1029   | No  | NA | 0     | 1  | Low-quality      | Genome-fragment | NA           | 1.44  | 0     |
| 52-final-viral-combined_k141_1451641  | [full]   | 1029   | No  | NA | 0     | 0  | Low-quality      | Genome-fragment | NA           | 0.79  | 0     |
| 59-final-viral-combined_k141_624771   | [full]   | 2264   | No  | NA | 0     | 1  | Not-determined   | Genome-fragment | NA           |       | 0     |
| 52-final-viral-combined_k141_1883931  | [full]   | 1029   | No  | NA | 0     | 0  | Low-quality      | Genome-fragment | NA           | 1.88  | 0     |
| 59-final-viral-combined_k141_781671   | [full]   | 1213   | No  | NA | 0     | 1  | Not-determined   | Genome-fragment | NA           |       | 0     |
| 52_k141_70349                         |          | 1029   | No  | NA | 0     | 0  | Low-quality      | Genome-fragment | NA           | 0.59  | 0     |
| 59-final-viral-combined_k141_573951   | [full]   | 1114   | No  | NA | 0     | 0  | Not-determined   | Genome-fragment | NA           |       | 0     |
| 52_k141_9348                          |          | 1029   | No  | NA | 0     | 0  | Low-quality      | Genome-fragment | NA           | 0.25  | 0     |
| 59-final-viral-combined_k141_17451    | [full]   | 1584   | No  | NA | 0     | 0  | Not-determined   | Genome-fragment | NA           |       | 0     |
| 54-final-viral-combined_k141_316001   | [full]   | 1029   | No  | NA | 0     | 1  | Low-quality      | Genome-fragment | NA           | 0.98  | 0     |
| 59-final-viral-combined_k141_774481   | [full]   | 1029   | No  | NA | 0     | 3  | Low-quality      | Genome-fragment | NA           | 0.45  | 0     |
| 59-final-viral-combined_k141_1154191  | [full]   | 2231   | No  | NA | 0     | 2  |                  |                 |              |       |       |



|                                      |          |      |     |    |     |   |                |                 |                 |      |
|--------------------------------------|----------|------|-----|----|-----|---|----------------|-----------------|-----------------|------|
| S9-final-viral-combined_k141_355221  | [full]   | 1924 | No  | NA | 0   | 0 | Not-determined | Genome-fragment | NA              | 0    |
| S9-final-viral-combined_k141_23230   | [full]   | 2260 | No  | NA | 0   | 0 | Not-determined | Genome-fragment | NA              | 0    |
| S9-final-viral-combined_k141_105058  | [full]   | 1640 | No  | NA | 0   | 3 | Not-determined | Genome-fragment | NA              | 0    |
| S11_k141_66707                       |          | 1031 | No  | NA | 0   | 0 | Low-quality    | Genome-fragment | NA              | 1.98 |
| S9-final-viral-combined_k141_105067  | [full]   | 2911 | No  | NA | 0   | 0 | Not-determined | Genome-fragment | NA              | 0    |
| S1_k141_223392                       |          | 1031 | No  | NA | 0   | 1 | Low-quality    | Genome-fragment | NA              | 0.36 |
| S9-final-viral-combined_k141_121464  | [full]   | 1912 | No  | NA | 0   | 2 | Not-determined | Genome-fragment | NA              | 0    |
| S9-final-viral-combined_k141_27619   | [full]   | 2278 | No  | NA | 0   | 3 | Not-determined | Genome-fragment | NA              | 0    |
| S5_k141_205857                       |          | 1031 | No  | NA | 0   | 1 | Low-quality    | Genome-fragment | NA              | 2.21 |
| S9-final-viral-combined_k141_89354   | [full]   | 1979 | No  | NA | 0   | 2 | Not-determined | Genome-fragment | NA              | 0    |
| S9-final-viral-combined_k141_14185   | [full]   | 2561 | No  | NA | 0   | 2 | Not-determined | Genome-fragment | NA              | 0    |
| S17-final-viral-combined_k141_39295  | [full]   | 1031 | No  | NA | 0   | 2 | Low-quality    | Genome-fragment | NA              | 0.42 |
| S9-final-viral-combined_k141_78481   | [full]   | 1574 | No  | NA | 0   | 1 | Not-determined | Genome-fragment | NA              | 0    |
| S9-final-viral-combined_k141_3982    | [full]   | 1683 | No  | NA | 0   | 0 | Not-determined | Genome-fragment | NA              | 0    |
| S9-final-viral-combined_k141_115654  | [full]   | 1728 | No  | NA | 0   | 2 | Not-determined | Genome-fragment | NA              | 0    |
| S9-final-viral-combined_k141_14225   | [full]   | 1159 | No  | NA | 0   | 2 | Not-determined | Genome-fragment | NA              | 0    |
| S9-final-viral-combined_k141_25157   | [full]   | 1432 | No  | NA | 0   | 1 | Not-determined | Genome-fragment | NA              | 0    |
| S9-final-viral-combined_k141_25165   | [full]   | 1363 | No  | NA | 0   | 2 | Not-determined | Genome-fragment | NA              | 0    |
| S9-final-viral-combined_k141_12626   | [full]   | 1559 | No  | NA | 0   | 0 | Not-determined | Genome-fragment | NA              | 0    |
| S9-final-viral-combined_k141_89420   | [full]   | 1437 | No  | NA | 0   | 2 | Not-determined | Genome-fragment | NA              | 0    |
| S9-final-viral-combined_k141_72636   | [full]   | 2204 | No  | NA | 0   | 1 | Not-determined | Genome-fragment | NA              | 0    |
| S9-final-viral-combined_k141_52208   | [full]   | 1745 | No  | NA | 0   | 1 | Not-determined | Genome-fragment | NA              | 0    |
| S17-k141_207077                      |          | 1031 | No  | NA | 1   | 0 | Low-quality    | Genome-fragment | NA              | 1.08 |
| S12-final-viral-combined_k141_373554 | [full]   | 1031 | No  | NA | 0   | 1 | Low-quality    | Genome-fragment | NA              | 0.29 |
| S9-final-viral-combined_k141_115753  | [full]   | 1316 | No  | NA | 0   | 1 | Not-determined | Genome-fragment | NA              | 0    |
| S9-final-viral-combined_k141_17655   | [full]   | 2816 | No  | NA | 0   | 1 | Not-determined | Genome-fragment | NA              | 0    |
| S9-final-viral-combined_k141_89444   | [full]   | 1618 | No  | NA | 0   | 0 | Not-determined | Genome-fragment | NA              | 0    |
| S9-final-viral-combined_k141_89445   | [full]   | 2342 | No  | NA | 0   | 3 | Not-determined | Genome-fragment | NA              | 0    |
| S12-final-viral-combined_k141_5016   | [full]   | 1031 | No  | NA | 0   | 1 | Low-quality    | Genome-fragment | NA              | 1.86 |
| S9-final-viral-combined_k141_19994   | [full]   | 1814 | No  | NA | 0   | 1 | Not-determined | Genome-fragment | NA              | 0    |
| S9-final-viral-combined_k141_17504   | [full]   | 1713 | No  | NA | 0   | 0 | Not-determined | Genome-fragment | NA              | 0    |
| S9-final-viral-combined_k141_15250   | [full]   | 1310 | No  | NA | 1   | 1 | Not-determined | Genome-fragment | NA              | 0    |
| S9-final-viral-combined_k141_115776  | [full]   | 2027 | No  | NA | 0   | 0 | Not-determined | Genome-fragment | NA              | 0    |
| S9-final-viral-combined_k141_67719   | [full]   | 3214 | No  | NA | 0   | 5 | Not-determined | Genome-fragment | NA              | 0    |
| S9-final-viral-combined_k141_72607   | [full]   | 2520 | No  | NA | 0   | 1 | Not-determined | Genome-fragment | NA              | 0    |
| S12-final-viral-combined_k141_241330 | [H2gene] | 1031 | No  | NA | 0   | 1 | Low-quality    | Genome-fragment | NA              | 1.79 |
| S9-final-viral-combined_k141_29914   | [full]   | 3512 | No  | NA | 0   | 1 | Not-determined | Genome-fragment | NA              | 0    |
| S2-final-viral-combined_k141_23430   | [H2gene] | 1031 | No  | NA | 1   | 0 | Low-quality    | Genome-fragment | NA              | 2.73 |
| S4-final-viral-combined_k141_114850  | [full]   | 1031 | No  | NA | 0   | 0 | Low-quality    | Genome-fragment | NA              | 2.38 |
| S9-final-viral-combined_k141_29936   | [full]   | 1542 | No  | NA | 0   | 1 | Not-determined | Genome-fragment | NA              | 0    |
| S4_k141_69250                        |          | 1031 | No  | NA | 2   | 0 | Low-quality    | Genome-fragment | NA              | 0.58 |
| S9-final-viral-combined_k141_9402    | [full]   | 2727 | No  | NA | 0   | 2 | Not-determined | Genome-fragment | NA              | 0    |
| S8_k141_216795                       |          | 1031 | No  | NA | 0   | 1 | Low-quality    | Genome-fragment | NA              | 1.76 |
| S11_k141_56944                       |          | 1032 | No  | NA | 1   | 0 | Low-quality    | Genome-fragment | NA              | 1.19 |
| S9-final-viral-combined_k141_126221  | [full]   | 1888 | No  | NA | 0   | 1 | Not-determined | Genome-fragment | NA              | 0    |
| S9-final-viral-combined_k141_35663   | [full]   | 1629 | No  | NA | 0   | 1 | Not-determined | Genome-fragment | NA              | 0    |
| S1-final-viral-combined_k141_138328  | [full]   | 1032 | No  | NA | 0   | 0 | Low-quality    | Genome-fragment | NA              | 2.63 |
| S9-final-viral-combined_k141_25284   | [full]   | 9080 | No  | NA | 0   | 6 | Not-determined | Genome-fragment | NA              | 0    |
| S9-final-viral-combined_k141_121625  | [full]   | 2849 | No  | NA | 0   | 2 | Not-determined | Genome-fragment | NA              | 0    |
| S9-final-viral-combined_k141_9423    | [full]   | 4377 | No  | NA | 0   | 5 | Not-determined | Genome-fragment | NA              | 0    |
| S3-final-viral-combined_k141_7655    | [H2gene] | 1032 | No  | NA | 2   | 0 | Low-quality    | Genome-fragment | NA              | 2.29 |
| S9-final-viral-combined_k141_67797   | [full]   | 2177 | No  | NA | 0   | 2 | Not-determined | Genome-fragment | NA              | 0    |
| S9-final-viral-combined_k141_67799   | [full]   | 1023 | No  | NA | 0   | 0 | Not-determined | Genome-fragment | NA              | 0    |
| S9-final-viral-combined_k141_14418   | [full]   | 3132 | No  | NA | 0   | 0 | Not-determined | Genome-fragment | NA              | 0    |
| S9-final-viral-combined_k141_109869  | [full]   | 1319 | No  | NA | 0   | 0 | Not-determined | Genome-fragment | NA              | 0    |
| S5_k141_167550                       |          | 1032 | No  | NA | 0   | 0 | Low-quality    | Genome-fragment | NA              | 0.59 |
| S9-final-viral-combined_k141_99745   | [full]   | 2363 | No  | NA | 0   | 1 | Not-determined | Genome-fragment | NA              | 0    |
| S12-final-viral-combined_k141_215088 | [full]   | 1032 | No  | NA | 0   | 0 | Low-quality    | Genome-fragment | NA              | 2.93 |
| S9-final-viral-combined_k141_72726   | [full]   | 2861 | No  | NA | 0   | 0 | Not-determined | Genome-fragment | NA              | 0    |
| S9-final-viral-combined_k141_29880   | [full]   | 1968 | No  | NA | 0   | 0 | Not-determined | Genome-fragment | NA              | 0    |
| S12_k141_81584                       |          | 1032 | No  | NA | 0   | 0 | Low-quality    | Genome-fragment | NA              | 0.57 |
| S9-final-viral-combined_k141_78706   | [full]   | 1963 | No  | NA | 0   | 1 | Not-determined | Genome-fragment | NA              | 0    |
| S2-final-viral-combined_k141_20938   | [full]   | 1032 | No  | NA | 0   | 1 | Low-quality    | Genome-fragment | NA              | 2.66 |
| S2_k141_223394                       |          | 1032 | No  | NA | 0   | 0 | Low-quality    | Genome-fragment | NA              | 0.42 |
| S4-final-viral-combined_k141_78140   | [full]   | 1032 | No  | NA | 0   | 1 | Low-quality    | Genome-fragment | NA              | 1.79 |
| S4_k141_153945                       |          | 1032 | No  | NA | 0   | 0 | Low-quality    | Genome-fragment | NA              | 1.72 |
| S8-final-viral-combined_k141_62520   | [H2gene] | 1032 | No  | NA | 1   | 0 | Low-quality    | Genome-fragment | NA              | 0.66 |
| S9-final-viral-combined_k141_111231  | [full]   | 1033 | No  | NA | 0   | 0 | Low-quality    | Genome-fragment | NA              | 1.86 |
| S9-final-viral-combined_k141_72770   | [full]   | 2017 | No  | NA | 0   | 0 | Not-determined | Genome-fragment | NA              | 0    |
| S9-final-viral-combined_k141_78736   | [full]   | 1795 | No  | NA | 0   | 0 | Not-determined | Genome-fragment | NA              | 0    |
| S9-final-viral-combined_k141_109925  | [full]   | 3081 | No  | NA | 0   | 2 | Not-determined | Genome-fragment | NA              | 0    |
| S9-final-viral-combined_k141_84378   | [full]   | 3000 | No  | NA | 0   | 3 | Not-determined | Genome-fragment | NA              | 0    |
| S11-final-viral-combined_k141_248292 | [full]   | 1033 | No  | NA | 0   | 0 | Low-quality    | Genome-fragment | NA              | 1.46 |
| S9-final-viral-combined_k141_89517   | [full]   | 3137 | No  | NA | 0   | 1 | Not-determined | Genome-fragment | NA              | 0    |
| S9-final-viral-combined_k141_121710  | [full]   | 2094 | No  | NA | 0   | 2 | Not-determined | Genome-fragment | NA              | 0    |
| S9-final-viral-combined_k141_105128  | [full]   | 3298 | No  | NA | 0   | 1 | Not-determined | Genome-fragment | NA              | 0    |
| S11-final-viral-combined_k141_187345 | [full]   | 1033 | No  | NA | 0   | 0 | Low-quality    | Genome-fragment | NA              | 1.04 |
| S9-final-viral-combined_k141_4194    | [full]   | 1180 | No  | NA | 0   | 1 | Not-determined | Genome-fragment | NA              | 0    |
| S9-final-viral-combined_k141_29845   | [full]   | 1843 | No  | NA | 0   | 1 | Not-determined | Genome-fragment | NA              | 0    |
| S9-final-viral-combined_k141_40869   | [full]   | 2998 | No  | NA | 0   | 2 | Not-determined | Genome-fragment | NA              | 0    |
| S11-final-viral-combined_k141_22596  | [H2gene] | 1033 | No  | NA | 1   | 0 | Low-quality    | Genome-fragment | NA              | 0.97 |
| S9-final-viral-combined_k141_72801   | [full]   | 5048 | No  | NA | 0   | 1 | Not-determined | Genome-fragment | NA              | 0    |
| S9-final-viral-combined_k141_121754  | [full]   | 1325 | No  | NA | 0   | 1 | Not-determined | Genome-fragment | NA              | 0    |
| S9-final-viral-combined_k141_30029   | [full]   | 6016 | No  | NA | 0   | 1 | Not-determined | Genome-fragment | NA              | 0    |
| S1-final-viral-combined_k141_25140   | [full]   | 1033 | No  | NA | 0   | 0 | Low-quality    | Genome-fragment | NA              | 2.41 |
| S9-final-viral-combined_k141_9500    | [full]   | 2304 | No  | NA | 0   | 0 | Not-determined | Genome-fragment | NA              | 0    |
| S9-final-viral-combined_k141_67912   | [full]   | 1805 | No  | NA | 0   | 3 | Not-determined | Genome-fragment | NA              | 0    |
| S9-final-viral-combined_k141_126341  | [full]   | 9842 | No  | NA | 0   | 1 | Not-determined | Genome-fragment | NA              | 0    |
| S5_k141_74002                        |          | 1033 | No  | NA | 0   | 0 | Low-quality    | Genome-fragment | NA              | 2.55 |
| S5_k141_30005                        |          | 1033 | No  | NA | 0   | 0 | Low-quality    | Genome-fragment | NA              | 1.4  |
| S9-final-viral-combined_k141_30032   | [full]   | 6936 | No  | NA | 0   | 5 | Not-determined | Genome-fragment | NA              | 2.04 |
| S7-final-viral-combined_k141_113528  | [full]   | 1033 | No  | NA | 0   | 1 | Low-quality    | Genome-fragment | NA              | 2.79 |
| S7-final-viral-combined_k141_159253  | [H2gene] | 1033 | No  | NA | 2   | 0 | Low-quality    | Genome-fragment | NA              | 2.09 |
| S7-final-viral-combined_k141_38611   | [H2gene] | 1033 | No  | NA | 1   | 0 | Low-quality    | Genome-fragment | NA              | 2.15 |
| S17-final-viral-combined_k141_16060  | [full]   | 1033 | No  | NA | 0   | 0 | Low-quality    | Genome-fragment | NA              | 2.98 |
| S9-final-viral-combined_k141_30041   | [full]   | 2292 | No  | NA | 0   | 0 | Not-determined | Genome-fragment | NA              | 0    |
| S9-final-viral-combined_k141_126365  | [full]   | 2768 | No  | NA | 0   | 3 | Not-determined | Genome-fragment | NA              | 0    |
| S17-final-viral-combined_k141_94213  | [full]   | 1033 | No  | NA | 3   | 0 | Low-quality    | Genome-fragment | NA              | 2.85 |
| S9-final-viral-combined_k141_35716   | [full]   | 2578 | No  | NA | 0   | 1 | Not-determined | Genome-fragment | NA              | 0    |
| S9-final-viral-combined_k141_109995  | [full]   | 1552 | No  | NA | 0   | 0 | Not-determined | Genome-fragment | NA              | 0    |
| S9-final-viral-combined_k141_72832   | [full]   | 1078 | No  | NA | 0   | 1 | Not-determined | Genome-fragment | NA              | 0    |
| S9-final-viral-combined_k141_34493   | [full]   | 1037 | No  | NA | 0   | 0 | Not-determined | Genome-fragment | NA              | 0    |
| S17-final-viral-combined_k141_155344 | [H2gene] | 1033 | No  | NA | 1   | 0 | Low-quality    | Genome-fragment | NA              | 2.54 |
| S12-final-viral-combined_k141_308608 | [full]   | 1033 | Yes | NA | 423 | 1 | 1              | Low-quality     | Genome-fragment | 0.55 |
| S9-final-viral-combined_k141_39797   | [full]   | 1160 | No  | NA | 0   | 0 | Not-determined | Genome-fragment | NA              | 0    |
| S9-final-viral-combined_k141_126389  | [full]   | 3647 | No  | NA | 0   | 3 | Not-determined | Genome-fragment | NA              | 0    |
| S12-final-viral-combined_k141_396656 | [full]   | 1033 | No  | NA | 2   | 0 | Low-quality    | Genome-fragment | NA              | 2.26 |
| S9-final-viral-combined_k141_46188   | [full]   | 1074 | No  | NA | 0   | 0 | Not-determined | Genome-fragment | NA              | 0    |
| S9-final-viral-combined_k141_46203   | [full]   | 1787 | No  | NA | 0   | 0 | Not-determined | Genome-fragment | NA              | 0    |
| S9-final-viral-combined_k141_25440   | [full]   | 1477 | No  | NA | 0   | 1 | Not-determined | Genome-fragment | NA              | 2.63 |
| S12-final-viral-combined_k141_314639 | [full]   | 1033 | No  | NA | 2   | 0 | Low-quality    | Genome-fragment | NA              | 0    |
| S9-final-viral-combined_k141_46214   | [full]   | 3186 | No  | NA | 0   | 0 | Not-determined | Genome-fragment | NA              | 0    |
| S9-final-viral-combined_k141_30124   | [full]   | 2057 | No  | NA | 0   | 2 | Not-determined | Genome-fragment | NA              | 0    |
| S9-final-viral-combined_k141_105178  | [full]   | 1494 | No  | NA | 0   | 1 | Not-determined | Genome-fragment | NA              | 1.76 |
| S12-final-viral-combined_k141_81214  | [full]   | 1033 | No  | NA | 0   | 0 | Low-quality    | Genome-fragment | NA              | 0    |
| S9-final-viral-combined_k141_126467  | [full]   | 1942 | No  | NA | 0   | 1 | Not-determined | Genome-fragment | NA              | 0    |
| S9-final-viral-combined_k141_72891   | [full]   | 1643 | No  | NA | 0   | 2 | Not-determined | Genome-fragment | NA              | 0    |
| S9-final-viral-combined_k141_40988   | [full]   | 3104 | No  | NA | 0   | 4 | Not-determined | Genome-fragment | NA              | 0    |
| S9-final-viral-combined_k141_46260   | [full]   | 3289 | No  | NA | 0   | 2 | Not-determined | Genome-fragment | NA              | 0    |
| S9-final-viral-combined_k141_126480  | [full]   | 3020 | No  | NA | 0   | 1 | Not-determined | Genome-fragment | NA              | 0    |
| S9-final-viral-combined_k141_72902   | [full]   | 1451 | No  | NA | 0   | 1 | Not-determined | Genome-fragment | NA              | 0    |
| S9-final-viral-combined_k141_29843   | [full]   | 3100 | No  | NA | 0   | 1 | Not-determined | Genome-fragment | NA              | 0    |
| S12-final-viral-combined_k141_220662 | [H2gene] | 1033 | No  | NA | 2   | 0 | Low-quality    | Genome-fragment | NA              | 2.37 |
| S12_k141_229923                      |          | 1033 | No  | NA | 0   | 0 | Low-quality    | Genome-fragment | NA              | 3.5  |
| S9-final-viral-combined_k141_30321   | [full]   | 2148 | No  | NA | 0   | 1 | Not-determined | Genome-fragment | NA              | 0    |
| S9-final-viral-combined_k141_78905   | [full]   | 1111 | No  | NA | 0   | 0 | Not-determined | Genome-fragment | NA              | 0    |
| S2-final-viral-combined_k141_117916  | [full]   | 1033 | No  | NA | 0   | 1 | Low-quality    | Genome-fragment | NA              | 0.62 |
| S9-final-viral-combined_k141_41058   | [full]   | 1598 | No  | NA | 0   | 2 | Not-determined | Genome-fragment | NA              | 0    |
| S9-final-viral-combined_k141_99990   | [full]   | 2222 | No  | NA | 0   | 0 | Not-determined | Genome-fragment | NA              | 0    |
| S4-final-viral-combined_k141_12414   | [full]   | 1033 | No  | NA | 3   | 0 | Low-quality    | Genome-fragment | NA              | 1.69 |
| S11-final-viral-combined_k141_92607  | [full]   | 1034 | No  | NA | 0   | 0 | Low-quality    | Genome-fragment |                 |      |



|                                      |          |       |     |       |    |    |                |                 |    |       |      |
|--------------------------------------|----------|-------|-----|-------|----|----|----------------|-----------------|----|-------|------|
| S9-final-viral-combined_k141_116120  | [full]   | 2234  | No  | NA    | 0  | 3  | Not-determined | Genome-fragment | NA | 0     | 0    |
| S17-final-viral-combined_k141_199782 | [full]   | 1034  | No  | NA    | 0  | 0  | Low-quality    | Genome-fragment | NA | 0.74  | 0    |
| S9-final-viral-combined_k141_46394   | [full]   | 1393  | No  | NA    | 0  | 0  | Not-determined | Genome-fragment | NA | 0     | 0    |
| S12-final-viral-combined_k141_235769 | [full]   | 1034  | No  | NA    | 1  | 0  | Low-quality    | Genome-fragment | NA | 2.99  | 0    |
| S9-final-viral-combined_k141_41180   | [full]   | 1607  | No  | NA    | 0  | 2  | Not-determined | Genome-fragment | NA | 0     | 0    |
| S9-final-viral-combined_k141_14809   | [full]   | 2058  | No  | NA    | 0  | 1  | Not-determined | Genome-fragment | NA | 0.31  | 0    |
| S9-final-viral-combined_k141_57820   | [full]   | 3230  | No  | NA    | 0  | 0  | Not-determined | Genome-fragment | NA | 0     | 0    |
| S9-final-viral-combined_k141_122067  | [full]   | 10762 | No  | NA    | 0  | 7  | Not-determined | Genome-fragment | NA | 0     | 0    |
| S12-final-viral-combined_k141_212701 | [full]   | 1034  | No  | NA    | 0  | 1  | Low-quality    | Genome-fragment | NA | 1.27  | 0    |
| S9-final-viral-combined_k141_52671   | [full]   | 5771  | No  | NA    | 0  | 3  | Not-determined | Genome-fragment | NA | 0     | 0    |
| S9-final-viral-combined_k141_46439   | [full]   | 1298  | No  | NA    | 0  | 0  | Not-determined | Genome-fragment | NA | 0     | 0    |
| S9-final-viral-combined_k141_35590   | [full]   | 2108  | No  | NA    | 0  | 1  | Not-determined | Genome-fragment | NA | 0     | 0    |
| S9-final-viral-combined_k141_105462  | [full]   | 30714 | No  | NA    | 19 | 3  | Medium-quality | Genome-fragment | NA | 68.9  | 0    |
| S12-final-viral-combined_k141_122318 | [full]   | 1034  | No  | NA    | 0  | 0  | Low-quality    | Genome-fragment | NA | 0.3   | 0    |
| S2-final-viral-combined_k141_121987  | [full]   | 1034  | No  | NA    | 0  | 0  | Low-quality    | Genome-fragment | NA | 2.07  | 0    |
| S2-final-viral-combined_k141_107581  | [full]   | 1034  | No  | NA    | 0  | 1  | Low-quality    | Genome-fragment | NA | 0.31  | 0    |
| S9-final-viral-combined_k141_122084  | [full]   | 2786  | No  | NA    | 0  | 1  | Not-determined | Genome-fragment | NA | 0     | 0    |
| S9-final-viral-combined_k141_84735   | [full]   | 3232  | No  | NA    | 0  | 1  | Not-determined | Genome-fragment | NA | 0     | 0    |
| S2-final-viral-combined_k141_202378  | [full]   | 1034  | No  | NA    | 0  | 0  | Low-quality    | Genome-fragment | NA | 0.74  | 0    |
| S9-final-viral-combined_k141_57844   | [full]   | 2487  | No  | NA    | 0  | 1  | Not-determined | Genome-fragment | NA | 0     | 0    |
| S8-final-viral-combined_k141_164368  | [H2gene] | 1034  | No  | NA    | 1  | 0  | Low-quality    | Genome-fragment | NA | 0.96  | 0    |
| S9-final-viral-combined_k141_36010   | [full]   | 2108  | No  | NA    | 0  | 0  | Not-determined | Genome-fragment | NA | 0     | 0    |
| S9-final-viral-combined_k141_57855   | [full]   | 2717  | No  | NA    | 0  | 1  | Not-determined | Genome-fragment | NA | 0     | 0    |
| S8_k141_114240                       |          | 1034  | No  | NA    | 0  | 0  | Low-quality    | Genome-fragment | NA | 1.6   | 0    |
| S11-final-viral-combined_k141_136302 | [full]   | 1035  | No  | NA    | 1  | 0  | Low-quality    | Genome-fragment | NA | 0.67  | 0    |
| S11_k141_159534                      |          | 1035  | No  | NA    | 0  | 1  | Low-quality    | Genome-fragment | NA | 2.12  | 0    |
| S1-final-viral-combined_k141_334103  | [full]   | 1035  | No  | NA    | 1  | 0  | Low-quality    | Genome-fragment | NA | 1.85  | 0    |
| S9-final-viral-combined_k141_36053   | [full]   | 1242  | No  | NA    | 0  | 1  | Not-determined | Genome-fragment | NA | 0     | 0    |
| S9-final-viral-combined_k141_110263  | [full]   | 2717  | No  | NA    | 0  | 0  | Not-determined | Genome-fragment | NA | 0     | 0    |
| S1_k141_268356                       |          | 1035  | No  | NA    | 0  | 2  | Low-quality    | Genome-fragment | NA | 0.5   | 0    |
| S9-final-viral-combined_k141_100210  | [full]   | 4272  | No  | NA    | 0  | 3  | Not-determined | Genome-fragment | NA | 0     | 0    |
| S9-final-viral-combined_k141_345777  | [full]   | 2178  | No  | NA    | 0  | 2  | Not-determined | Genome-fragment | NA | 0     | 0    |
| S3_k141_31389                        |          | 1035  | No  | NA    | 0  | 1  | Low-quality    | Genome-fragment | NA | 0.44  | 0    |
| S9-final-viral-combined_k141_90016   | [full]   | 3753  | No  | NA    | 0  | 3  | Not-determined | Genome-fragment | NA | 0     | 0    |
| S9-final-viral-combined_k141_46507   | [full]   | 2612  | No  | NA    | 0  | 2  | Not-determined | Genome-fragment | NA | 0     | 0    |
| S7-final-viral-combined_k141_22648   | [full]   | 1035  | No  | NA    | 0  | 1  | Low-quality    | Genome-fragment | NA | 1.67  | 0    |
| S9-final-viral-combined_k141_84849   | [full]   | 1468  | No  | NA    | 0  | 1  | Not-determined | Genome-fragment | NA | 0     | 0    |
| S9-final-viral-combined_k141_41220   | [full]   | 1201  | No  | NA    | 0  | 1  | Not-determined | Genome-fragment | NA | 0     | 0    |
| S9-final-viral-combined_k141_63437   | [full]   | 1018  | No  | NA    | 0  | 2  | Not-determined | Genome-fragment | NA | 0     | 0    |
| S12-final-viral-combined_k141_386017 | [full]   | 1035  | No  | NA    | 0  | 0  | Low-quality    | Genome-fragment | NA | 1.72  | 0    |
| S12-final-viral-combined_k141_95332  | [full]   | 1035  | No  | NA    | 0  | 0  | Low-quality    | Genome-fragment | NA | 2.21  | 0    |
| S12-final-viral-combined_k141_26545  | [full]   | 1035  | No  | NA    | 0  | 0  | Low-quality    | Genome-fragment | NA | 2.44  | 0    |
| S9-final-viral-combined_k141_25704   | [full]   | 1967  | No  | NA    | 0  | 1  | Not-determined | Genome-fragment | NA | 0     | 0    |
| S9-final-viral-combined_k141_25706   | [full]   | 1685  | No  | NA    | 0  | 1  | Not-determined | Genome-fragment | NA | 0     | 0    |
| S12-final-viral-combined_k141_34563  | [H2gene] | 1035  | No  | NA    | 1  | 0  | Low-quality    | Genome-fragment | NA | 1.88  | 0    |
| S9-final-viral-combined_k141_12620   | [full]   | 3278  | No  | NA    | 0  | 3  | Not-determined | Genome-fragment | NA | 0     | 0    |
| S2_k141_158887                       |          | 1035  | No  | NA    | 1  | 0  | Low-quality    | Genome-fragment | NA | 2.41  | 0    |
| S4_k141_75982                        |          | 1035  | No  | NA    | 0  | 0  | Low-quality    | Genome-fragment | NA | 1.01  | 0    |
| S9-final-viral-combined_k141_84913   | [full]   | 4159  | No  | NA    | 0  | 2  | Not-determined | Genome-fragment | NA | 0     | 0    |
| S4_k141_118283                       |          | 1035  | No  | NA    | 0  | 0  | Low-quality    | Genome-fragment | NA | 1.5   | 0    |
| S9-final-viral-combined_k141_57937   | [full]   | 2896  | No  | NA    | 0  | 2  | Not-determined | Genome-fragment | NA | 0     | 0    |
| S9-final-viral-combined_k141_22965   | [full]   | 1036  | No  | NA    | 0  | 1  | Low-quality    | Genome-fragment | NA | 0.85  | 0    |
| S9-final-viral-combined_k141_63464   | [full]   | 1581  | No  | NA    | 0  | 1  | Not-determined | Genome-fragment | NA | 0     | 0    |
| S9-final-viral-combined_k141_9844    | [full]   | 1862  | No  | NA    | 0  | 2  | Not-determined | Genome-fragment | NA | 0     | 0    |
| S9-final-viral-combined_k141_30435   | [full]   | 2065  | No  | NA    | 0  | 2  | Not-determined | Genome-fragment | NA | 0     | 0    |
| S9-final-viral-combined_k141_13738   | [H2gene] | 1036  | No  | NA    | 1  | 0  | Low-quality    | Genome-fragment | NA | 0.77  | 0    |
| S11-final-viral-combined_k141_127675 | [full]   | 1036  | No  | NA    | 0  | 0  | Low-quality    | Genome-fragment | NA | 2.15  | 0    |
| S9-final-viral-combined_k141_79151   | [full]   | 2440  | No  | NA    | 0  | 0  | Not-determined | Genome-fragment | NA | 0     | 0    |
| S9-final-viral-combined_k141_110341  | [full]   | 2388  | No  | NA    | 0  | 0  | Not-determined | Genome-fragment | NA | 0     | 0    |
| S9-final-viral-combined_k141_36196   | [full]   | 1886  | No  | NA    | 0  | 0  | Not-determined | Genome-fragment | NA | 0     | 0    |
| S11-final-viral-combined_k141_247174 | [full]   | 1036  | No  | NA    | 0  | 0  | Low-quality    | Genome-fragment | NA | 3.14  | 0    |
| S7-final-viral-combined_k141_95159   | [full]   | 1036  | No  | NA    | 0  | 0  | Low-quality    | Genome-fragment | NA | 1.78  | 0    |
| S7-final-viral-combined_k141_35944   | [H2gene] | 1036  | No  | NA    | 0  | 0  | Low-quality    | Genome-fragment | NA | 1.92  | 0    |
| S9-final-viral-combined_k141_79133   | [full]   | 1024  | No  | NA    | 0  | 1  | Not-determined | Genome-fragment | NA | 0     | 0    |
| S9-final-viral-combined_k141_30472   | [full]   | 4844  | No  | NA    | 0  | 0  | Not-determined | Genome-fragment | NA | 0     | 0    |
| S17-final-viral-combined_k141_129024 | [full]   | 1036  | No  | NA    | 1  | 0  | Low-quality    | Genome-fragment | NA | 2.37  | 0    |
| S12-final-viral-combined_k141_272478 | [full]   | 1036  | No  | NA    | 0  | 0  | Low-quality    | Genome-fragment | NA | 1.2   | 0    |
| S9-final-viral-combined_k141_41287   | [full]   | 2633  | No  | NA    | 0  | 3  | Not-determined | Genome-fragment | NA | 0     | 0    |
| S9-final-viral-combined_k141_30483   | [full]   | 2109  | No  | NA    | 0  | 0  | Not-determined | Genome-fragment | NA | 0.56  | 0    |
| S9-final-viral-combined_k141_41289   | [full]   | 1291  | No  | NA    | 0  | 0  | Not-determined | Genome-fragment | NA | 0     | 0    |
| S9-final-viral-combined_k141_9918    | [full]   | 1438  | No  | NA    | 0  | 2  | Not-determined | Genome-fragment | NA | 0     | 0    |
| S9-final-viral-combined_k141_9929    | [full]   | 1874  | No  | NA    | 0  | 3  | Not-determined | Genome-fragment | NA | 0     | 0    |
| S9-final-viral-combined_k141_126656  | [full]   | 7921  | No  | NA    | 0  | 2  | Not-determined | Genome-fragment | NA | 0     | 0    |
| S12-final-viral-combined_k141_215420 | [full]   | 1036  | No  | NA    | 0  | 0  | Low-quality    | Genome-fragment | NA | 2.56  | 0    |
| S2-final-viral-combined_k141_40943   | [full]   | 1036  | No  | NA    | 0  | 0  | Low-quality    | Genome-fragment | NA | 0.69  | 0    |
| S2-final-viral-combined_k141_195006  | [H2gene] | 1036  | No  | NA    | 1  | 0  | Low-quality    | Genome-fragment | NA | 2.62  | 0    |
| S9_k141_39619                        |          | 1037  | No  | NA    | 0  | 0  | Low-quality    | Genome-fragment | NA | 1.73  | 0    |
| S11-final-viral-combined_k141_77953  | [full]   | 1037  | No  | NA    | 0  | 1  | Low-quality    | Genome-fragment | NA | 0.45  | 0    |
| S9-final-viral-combined_k141_38051   | [full]   | 2115  | No  | NA    | 0  | 1  | Not-determined | Genome-fragment | NA | 0.56  | 0    |
| S11-final-viral-combined_k141_305212 | [H2gene] | 1037  | No  | NA    | 1  | 0  | Low-quality    | Genome-fragment | NA | 2.27  | 0    |
| S11-final-viral-combined_k141_90167  | [full]   | 1756  | No  | NA    | 0  | 2  | Not-determined | Genome-fragment | NA | 0     | 0    |
| S9-final-viral-combined_k141_94600   | [full]   | 7777  | No  | NA    | 0  | 4  | Not-determined | Genome-fragment | NA | 0     | 0    |
| S9-final-viral-combined_k141_68596   | [full]   | 2570  | No  | NA    | 0  | 2  | Not-determined | Genome-fragment | NA | 0     | 0    |
| S9-final-viral-combined_k141_63519   | [full]   | 1020  | No  | NA    | 0  | 1  | Not-determined | Genome-fragment | NA | 0     | 0    |
| S1-final-viral-combined_k141_247751  | [full]   | 1037  | No  | NA    | 0  | 0  | Low-quality    | Genome-fragment | NA | 2.14  | 0    |
| S5-final-viral-combined_k141_57499   | [full]   | 1037  | No  | NA    | 0  | 0  | Low-quality    | Genome-fragment | NA | 1.66  | 0    |
| S7-final-viral-combined_k141_134520  | [full]   | 1037  | No  | NA    | 0  | 1  | Low-quality    | Genome-fragment | NA | 0.5   | 0    |
| S9-final-viral-combined_k141_126713  | [full]   | 1343  | No  | NA    | 0  | 1  | Not-determined | Genome-fragment | NA | 0     | 0    |
| S9-final-viral-combined_k141_20185   | [full]   | 4470  | No  | NA    | 0  | 0  | Not-determined | Genome-fragment | NA | 0     | 0    |
| S7-final-viral-combined_k141_128899  | [full]   | 1037  | No  | NA    | 1  | 0  | Low-quality    | Genome-fragment | NA | 1.85  | 0    |
| S7_k141_131325                       |          | 1037  | No  | NA    | 1  | 0  | Low-quality    | Genome-fragment | NA | 2.36  | 0    |
| S9-final-viral-combined_k141_20445   | [full]   | 80205 | Yes | 38188 | 36 | 45 | Complete       | Genome-fragment | NA | 100   | 57.1 |
| S9-final-viral-combined_k141_122305  | [full]   | 1101  | No  | NA    | 0  | 1  | Not-determined | Genome-fragment | NA | 0     | 0    |
| S9-final-viral-combined_k141_9931    | [full]   | 90630 | Yes | 43033 | 25 | 16 | Medium-quality | Genome-fragment | NA | 63.56 | 52.2 |
| S17-final-viral-combined_k141_260489 | [full]   | 1037  | No  | NA    | 1  | 0  | Low-quality    | Genome-fragment | NA | 0.56  | 0    |
| S17-final-viral-combined_k141_250368 | [full]   | 1037  | No  | NA    | 1  | 0  | Low-quality    | Genome-fragment | NA | 1.83  | 0    |
| S17-k141_129807                      |          | 1037  | No  | NA    | 0  | 0  | Low-quality    | Genome-fragment | NA | 8.1   | 0    |
| S9-final-viral-combined_k141_52901   | [full]   | 2274  | No  | NA    | 0  | 3  | Not-determined | Genome-fragment | NA | 0     | 0    |
| S17-k141_143946                      |          | 1037  | No  | NA    | 0  | 1  | Low-quality    | Genome-fragment | NA | 1.49  | 0    |
| S9-final-viral-combined_k141_4592    | [full]   | 5015  | No  | NA    | 0  | 5  | Not-determined | Genome-fragment | NA | 0     | 0    |
| S12-final-viral-combined_k141_39636  | [full]   | 1037  | No  | NA    | 1  | 0  | Low-quality    | Genome-fragment | NA | 2.36  | 0    |
| S2-final-viral-combined_k141_187101  | [full]   | 1037  | No  | NA    | 0  | 1  | Low-quality    | Genome-fragment | NA | 1.52  | 0    |
| S9-final-viral-combined_k141_52911   | [full]   | 1469  | No  | NA    | 0  | 0  | Not-determined | Genome-fragment | NA | 0     | 0    |
| S9-final-viral-combined_k141_68636   | [full]   | 1051  | No  | NA    | 0  | 1  | Not-determined | Genome-fragment | NA | 0     | 0    |
| S9-final-viral-combined_k141_24795   | [full]   | 2286  | No  | NA    | 0  | 1  | Not-determined | Genome-fragment | NA | 0     | 0    |
| S2-final-viral-combined_k141_222648  | [full]   | 1037  | No  | NA    | 2  | 0  | Low-quality    | Genome-fragment | NA | 2.57  | 0    |
| S9-final-viral-combined_k141_94800   | [full]   | 5033  | No  | NA    | 0  | 5  | Not-determined | Genome-fragment | NA | 0     | 0    |
| S9-final-viral-combined_k141_105561  | [full]   | 3635  | No  | NA    | 0  | 1  | Not-determined | Genome-fragment | NA | 0     | 0    |
| S9-final-viral-combined_k141_41506   | [full]   | 2312  | No  | NA    | 0  | 0  | Not-determined | Genome-fragment | NA | 0     | 0    |
| S9-final-viral-combined_k141_41507   | [full]   | 1394  | No  | NA    | 0  | 2  | Not-determined | Genome-fragment | NA | 0     | 0    |
| S9-final-viral-combined_k141_30636   | [full]   | 2752  | No  | NA    | 0  | 0  | Not-determined | Genome-fragment | NA | 0     | 0    |
| S9-final-viral-combined_k141_116198  | [full]   | 5525  | No  | NA    | 0  | 2  | Not-determined | Genome-fragment | NA | 0     | 0    |
| S9-final-viral-combined_k141_16299   | [full]   | 2607  | No  | NA    | 0  | 2  | Not-determined | Genome-fragment | NA | 0     | 0    |
| S9-final-viral-combined_k141_63666   | [full]   | 1547  | No  | NA    | 0  | 1  | Not-determined | Genome-fragment | NA | 0     | 0    |
| S9-final-viral-combined_k141_58080   | [full]   | 1961  | No  | NA    | 0  | 2  | Not-determined | Genome-fragment | NA | 0     | 0    |
| S2-final-viral-combined_k141_43047   | [H2gene] | 1037  | No  | NA    | 1  | 0  | Low-quality    | Genome-fragment | NA | 2.63  | 0    |
| S9-final-viral-combined_k141_30672   | [full]   | 1974  | No  | NA    | 0  | 1  | Not-determined | Genome-fragment | NA | 0     | 0    |
| S8_k141_22263                        |          | 1037  | No  | NA    | 0  | 0  | Low-quality    | Genome-fragment | NA | 2.46  | 0    |
| S9-final-viral-combined_k141_20602   | [full]   | 1974  | No  | NA    | 0  | 0  | Not-determined | Genome-fragment | NA | 0     | 0    |
| S9-final-viral-combined_k141_49194   | [full]   | 1038  | No  | NA    | 0  | 2  | Low-quality    | Genome-fragment | NA | 0.34  | 0    |
| S9_k141_7196                         |          | 1038  | No  | NA    | 0  | 0  | Low-quality    | Genome-fragment | NA | 0.7   | 0    |
| S11-final-viral-combined_k141_21024  | [full]   | 1038  | No  | NA    | 0  | 0  | Low-quality    | Genome-fragment | NA | 0     | 0    |
| S11-final-viral-combined_k141_47582  | [H2gene] | 1547  | No  |       |    |    |                |                 |    |       |      |



|                                      |          |       |    |    |                |                 |                |                 |       |   |
|--------------------------------------|----------|-------|----|----|----------------|-----------------|----------------|-----------------|-------|---|
| 59-final-viral-combined_k141_365261  | [full]   | 1124  | No | NA | 0              | 1               | Not-determined | Genome-fragment | NA    | 0 |
| 52_k141_214759                       |          | 1038  | No | NA | 1              | 0               | Low-quality    | Genome-fragment | 1.14  | 0 |
| 54-final-viral-combined_k141_106357  | [full]   | 1038  | No | NA | 0              | 1               | Low-quality    | Genome-fragment | 0.37  | 0 |
| 59-final-viral-combined_k141_100710  | [full]   | 1092  | No | NA | 0              | 1               | Not-determined | Genome-fragment | NA    | 0 |
| 54_k141_49856                        |          | 1038  | No | NA | 1              | 0               | Low-quality    | Genome-fragment | 1.56  | 0 |
| 59-final-viral-combined_k141_416151  | [full]   | 2346  | No | NA | 0              | 2               | Not-determined | Genome-fragment | NA    | 0 |
| 59-final-viral-combined_k141_116492  | [full]   | 1714  | No | NA | 0              | 2               | Not-determined | Genome-fragment | NA    | 0 |
| 56-final-viral-combined_k141_817231  | [full]   | 1038  | No | NA | 1              | 0               | Low-quality    | Genome-fragment | 1.54  | 0 |
| 59-final-viral-combined_k141_416404  | [full]   | 1790  | No | NA | 0              | 0               | Not-determined | Genome-fragment | NA    | 0 |
| 59-final-viral-combined_k141_110571  | [full]   | 3823  | No | NA | 0              | 2               | Not-determined | Genome-fragment | NA    | 0 |
| 58-final-viral-combined_k141_121582  | [full]   | 1038  | No | NA | 0              | 0               | Low-quality    | Genome-fragment | 1.39  | 0 |
| 59-final-viral-combined_k141_261731  | [full]   | 1965  | No | NA | 0              | 1               | Not-determined | Genome-fragment | NA    | 0 |
| 59-final-viral-combined_k141_102131  | [full]   | 1186  | No | NA | 0              | 1               | Not-determined | Genome-fragment | NA    | 0 |
| 58_k141_24031                        |          | 1038  | No | NA | 0              | 1               | Low-quality    | Genome-fragment | 2.17  | 0 |
| 59-final-viral-combined_k141_531781  | [full]   | 1387  | No | NA | 0              | 1               | Not-determined | Genome-fragment | NA    | 0 |
| 59-final-viral-combined_k141_59072   | [full]   | 2479  | No | NA | 0              | 2               | Not-determined | Genome-fragment | NA    | 0 |
| 59-final-viral-combined_k141_97083   | [full]   | 1039  | No | NA | 2              | 0               | Low-quality    | Genome-fragment | 2.88  | 0 |
| 59-final-viral-combined_k141_60207   | [full]   | 1039  | No | NA | 0              | 0               | Low-quality    | Genome-fragment | 2.28  | 0 |
| 59-final-viral-combined_k141_88708   | [full]   | 1039  | No | NA | 0              | 0               | Low-quality    | Genome-fragment | 2.23  | 0 |
| 59_k141_30942                        |          | 1039  | No | NA | 0              | 0               | Low-quality    | Genome-fragment | 0.66  | 0 |
| 59-final-viral-combined_k141_100783  | [full]   | 1594  | No | NA | 0              | 1               | Not-determined | Genome-fragment | NA    | 0 |
| 59-final-viral-combined_k141_59102   | [full]   | 1342  | No | NA | 0              | 2               | Not-determined | Genome-fragment | NA    | 0 |
| 511-final-viral-combined_k141_60999  | [full]   | 1039  | No | NA | 0              | 0               | Low-quality    | Genome-fragment | 0.79  | 0 |
| 5438                                 | No       | NA    | 0  | 3  | Not-determined | Genome-fragment | NA             | 2.42            | 0     |   |
| 52-final-viral-combined_k141_150039  | [full]   | 1039  | No | NA | 0              | 0               | Low-quality    | Genome-fragment | NA    | 0 |
| 59-final-viral-combined_k141_366941  | [full]   | 1421  | No | NA | 0              | 1               | Not-determined | Genome-fragment | NA    | 0 |
| 51_k141_109164                       |          | 1039  | No | NA | 0              | 0               | Low-quality    | Genome-fragment | 1.92  | 0 |
| 59-final-viral-combined_k141_126981  | [full]   | 4142  | No | NA | 0              | 2               | Not-determined | Genome-fragment | NA    | 0 |
| 52_k141_81461                        |          | 1039  | No | NA | 1              | 0               | Low-quality    | Genome-fragment | 1.1   | 0 |
| 57-final-viral-combined_k141_226730  | [full]   | 1039  | No | NA | 0              | 0               | Low-quality    | Genome-fragment | 1.55  | 0 |
| 517-final-viral-combined_k141_210775 | [full]   | 1039  | No | NA | 0              | 0               | Low-quality    | Genome-fragment | 2.38  | 0 |
| 52-final-viral-combined_k141_172383  | [H2gene] | 1039  | No | NA | 1              | 0               | Low-quality    | Genome-fragment | 2.25  | 0 |
| 52_k141_241185                       |          | 1039  | No | NA | 0              | 2               | Low-quality    | Genome-fragment | 0.94  | 0 |
| 58_k141_204886                       |          | 1039  | No | NA | 0              | 2               | Low-quality    | Genome-fragment | 0.8   | 0 |
| 59-final-viral-combined_k141_19003   | [H2gene] | 1040  | No | NA | 1              | 0               | Low-quality    | Genome-fragment | 2.24  | 0 |
| 59-final-viral-combined_k141_49301   | [full]   | 2115  | No | NA | 0              | 0               | Not-determined | Genome-fragment | NA    | 0 |
| 59-final-viral-combined_k141_36747   | [full]   | 5815  | No | NA | 0              | 1               | Not-determined | Genome-fragment | NA    | 0 |
| 51-final-viral-combined_k141_217186  | [full]   | 1040  | No | NA | 0              | 0               | Low-quality    | Genome-fragment | 2.47  | 0 |
| 59-final-viral-combined_k141_532951  | [full]   | 1578  | No | NA | 0              | 1               | Not-determined | Genome-fragment | NA    | 0 |
| 59-final-viral-combined_k141_85328   | [full]   | 4066  | No | NA | 0              | 3               | Not-determined | Genome-fragment | NA    | 0 |
| 59-final-viral-combined_k141_116694  | [full]   | 2187  | No | NA | 0              | 2               | Not-determined | Genome-fragment | NA    | 0 |
| 51_k141_279021                       |          | 1040  | No | NA | 0              | 1               | Low-quality    | Genome-fragment | 0.5   | 0 |
| 59-final-viral-combined_k141_41802   | [full]   | 4608  | No | NA | 0              | 1               | Not-determined | Genome-fragment | NA    | 0 |
| 59-final-viral-combined_k141_26287   | [full]   | 1879  | No | NA | 0              | 2               | Not-determined | Genome-fragment | NA    | 0 |
| 57_k141_99963                        |          | 1040  | No | NA | 0              | 1               | Low-quality    | Genome-fragment | 0.16  | 0 |
| 59-final-viral-combined_k141_41818   | [full]   | 2621  | No | NA | 0              | 2               | Not-determined | Genome-fragment | NA    | 0 |
| 517-final-viral-combined_k141_11390  | [full]   | 1040  | No | NA | 2              | 0               | Low-quality    | Genome-fragment | 2.23  | 0 |
| 59-final-viral-combined_k141_90808   | [full]   | 1222  | No | NA | 0              | 1               | Not-determined | Genome-fragment | NA    | 0 |
| 59-final-viral-combined_k141_30979   | [full]   | 3417  | No | NA | 0              | 2               | Not-determined | Genome-fragment | NA    | 0 |
| 59-final-viral-combined_k141_73784   | [full]   | 1465  | No | NA | 0              | 1               | Not-determined | Genome-fragment | NA    | 0 |
| 59-final-viral-combined_k141_90818   | [full]   | 1486  | No | NA | 0              | 0               | Not-determined | Genome-fragment | NA    | 0 |
| 59-final-viral-combined_k141_59175   | [full]   | 4213  | No | NA | 0              | 1               | Not-determined | Genome-fragment | NA    | 0 |
| 59-final-viral-combined_k141_73804   | [full]   | 17806 | No | NA | 0              | 9               | Not-determined | Genome-fragment | NA    | 0 |
| 517-final-viral-combined_k141_105895 | [full]   | 1040  | No | NA | 0              | 0               | Low-quality    | Genome-fragment | 2.04  | 0 |
| 59-final-viral-combined_k141_58366   | [full]   | 1277  | No | NA | 0              | 0               | Not-determined | Genome-fragment | NA    | 0 |
| 59-final-viral-combined_k141_36873   | [full]   | 1689  | No | NA | 0              | 0               | Not-determined | Genome-fragment | NA    | 0 |
| 517-final-viral-combined_k141_150482 | [H2gene] | 1040  | No | NA | 0              | 0               | Low-quality    | Genome-fragment | 1.92  | 0 |
| 59-final-viral-combined_k141_85431   | [full]   | 3215  | No | NA | 0              | 1               | Not-determined | Genome-fragment | NA    | 0 |
| 59-final-viral-combined_k141_110571  | [full]   | 3212  | No | NA | 0              | 2               | Not-determined | Genome-fragment | NA    | 0 |
| 59-final-viral-combined_k141_116758  | [full]   | 2439  | No | NA | 0              | 2               | Not-determined | Genome-fragment | NA    | 0 |
| 59-final-viral-combined_k141_85438   | [full]   | 2835  | No | NA | 0              | 2               | Not-determined | Genome-fragment | NA    | 0 |
| 59-final-viral-combined_k141_116765  | [full]   | 5288  | No | NA | 0              | 4               | Not-determined | Genome-fragment | NA    | 0 |
| 59-final-viral-combined_k141_41907   | [full]   | 1695  | No | NA | 0              | 0               | Not-determined | Genome-fragment | NA    | 0 |
| 517-k141_196905                      |          | 1040  | No | NA | 0              | 0               | Low-quality    | Genome-fragment | 2.29  | 0 |
| 59-final-viral-combined_k141_105822  | [full]   | 43006 | No | NA | 32             | 0               | High-quality   | High-quality    | 97.82 | 0 |
| 517-k141_266339                      |          | 1040  | No | NA | 0              | 1               | Low-quality    | Genome-fragment | 0.33  | 0 |
| 59-final-viral-combined_k141_116787  | [full]   | 1193  | No | NA | 0              | 1               | Not-determined | Genome-fragment | NA    | 0 |
| 59-final-viral-combined_k141_90897   | [full]   | 1834  | No | NA | 0              | 0               | Not-determined | Genome-fragment | NA    | 0 |
| 512-final-viral-combined_k141_220784 | [full]   | 1040  | No | NA | 0              | 0               | Low-quality    | Genome-fragment | 0.66  | 0 |
| 59-final-viral-combined_k141_15463   | [full]   | 1189  | No | NA | 0              | 1               | Not-determined | Genome-fragment | NA    | 0 |
| 512-final-viral-combined_k141_75489  | [full]   | 1040  | No | NA | 3              | 0               | Low-quality    | Genome-fragment | 1.82  | 0 |
| 59-final-viral-combined_k141_59230   | [full]   | 2614  | No | NA | 0              | 2               | Not-determined | Genome-fragment | NA    | 0 |
| 59-final-viral-combined_k141_105854  | [full]   | 1308  | No | NA | 0              | 1               | Not-determined | Genome-fragment | NA    | 0 |
| 512-final-viral-combined_k141_29418  | [full]   | 1040  | No | NA | 0              | 1               | Low-quality    | Genome-fragment | 0.27  | 0 |
| 59-final-viral-combined_k141_53426   | [full]   | 1787  | No | NA | 0              | 2               | Not-determined | Genome-fragment | NA    | 0 |
| 512-final-viral-combined_k141_367961 | [H2gene] | 1040  | No | NA | 1              | 0               | Low-quality    | Genome-fragment | 2.52  | 0 |
| 52-final-viral-combined_k141_56058   | [H2gene] | 1040  | No | NA | 1              | 0               | Low-quality    | Genome-fragment | 2.21  | 0 |
| 59-final-viral-combined_k141_79889   | [full]   | 2416  | No | NA | 0              | 1               | Not-determined | Genome-fragment | NA    | 0 |
| 59-final-viral-combined_k141_31066   | [full]   | 3886  | No | NA | 0              | 1               | Not-determined | Genome-fragment | NA    | 0 |
| 59-final-viral-combined_k141_93448   | [full]   | 1041  | No | NA | 0              | 0               | Low-quality    | Genome-fragment | 2.63  | 0 |
| 59-final-viral-combined_k141_58458   | [full]   | 1893  | No | NA | 0              | 1               | Not-determined | Genome-fragment | NA    | 0 |
| 59-final-viral-combined_k141_26410   | [full]   | 6355  | No | NA | 31             | 0               | High-quality   | High-quality    | 100   | 0 |
| 51-final-viral-combined_k141_3234    | [H2gene] | 1041  | No | NA | 1              | 0               | Low-quality    | Genome-fragment | 1.9   | 0 |
| 55-final-viral-combined_k141_155346  | [full]   | 1041  | No | NA | 2              | 0               | Low-quality    | Genome-fragment | 3.07  | 0 |
| 55-final-viral-combined_k141_16432   | [H2gene] | 1041  | No | NA | 0              | 0               | Low-quality    | Genome-fragment | 1.5   | 0 |
| 59-final-viral-combined_k141_122746  | [full]   | 1987  | No | NA | 0              | 1               | Not-determined | Genome-fragment | NA    | 0 |
| 59-final-viral-combined_k141_122747  | [full]   | 2196  | No | NA | 0              | 1               | Not-determined | Genome-fragment | NA    | 0 |
| 59-final-viral-combined_k141_101131  | [full]   | 1634  | No | NA | 0              | 1               | Not-determined | Genome-fragment | NA    | 0 |
| 59-final-viral-combined_k141_10362   | [full]   | 1328  | No | NA | 0              | 0               | Not-determined | Genome-fragment | NA    | 0 |
| 59-final-viral-combined_k141_26458   | [full]   | 1282  | No | NA | 0              | 0               | Not-determined | Genome-fragment | NA    | 0 |
| 59-final-viral-combined_k141_15629   | [full]   | 2450  | No | NA | 0              | 2               | Not-determined | Genome-fragment | NA    | 0 |
| 57-final-viral-combined_k141_124172  | [H2gene] | 1041  | No | NA | 0              | 0               | Low-quality    | Genome-fragment | 2.19  | 0 |
| 59-final-viral-combined_k141_58515   | [full]   | 1459  | No | NA | 1              | 0               | Not-determined | Genome-fragment | NA    | 0 |
| 512-final-viral-combined_k141_352541 | [full]   | 1041  | No | NA | 0              | 0               | Low-quality    | Genome-fragment | 1.52  | 0 |
| 59-final-viral-combined_k141_37121   | [full]   | 1587  | No | NA | 0              | 0               | Not-determined | Genome-fragment | NA    | 0 |
| 59-final-viral-combined_k141_37126   | [full]   | 1601  | No | NA | 0              | 0               | Not-determined | Genome-fragment | NA    | 0 |
| 59-final-viral-combined_k141_26533   | [full]   | 1823  | No | NA | 0              | 1               | Not-determined | Genome-fragment | NA    | 0 |
| 59-final-viral-combined_k141_101207  | [full]   | 1217  | No | NA | 0              | 1               | Not-determined | Genome-fragment | NA    | 0 |
| 59-final-viral-combined_k141_26559   | [full]   | 1648  | No | NA | 0              | 2               | Not-determined | Genome-fragment | NA    | 0 |
| 59-final-viral-combined_k141_47018   | [full]   | 1183  | No | NA | 0              | 0               | Not-determined | Genome-fragment | NA    | 0 |
| 512_k141_256968                      |          | 1041  | No | NA | 0              | 2               | Low-quality    | Genome-fragment | 2.12  | 0 |
| 52-final-viral-combined_k141_52837   | [full]   | 1041  | No | NA | 0              | 0               | Low-quality    | Genome-fragment | 1.28  | 0 |
| 52-final-viral-combined_k141_240189  | [full]   | 1041  | No | NA | 0              | 0               | Low-quality    | Genome-fragment | 1.83  | 0 |
| 59-final-viral-combined_k141_127086  | [full]   | 1014  | No | NA | 0              | 1               | Not-determined | Genome-fragment | NA    | 0 |
| 59-final-viral-combined_k141_5130    | [full]   | 1316  | No | NA | 0              | 1               | Not-determined | Genome-fragment | NA    | 0 |
| 59-final-viral-combined_k141_26615   | [full]   | 3058  | No | NA | 0              | 0               | Not-determined | Genome-fragment | NA    | 0 |
| 54_k141_76287                        |          | 1041  | No | NA | 0              | 1               | Low-quality    | Genome-fragment | 0.14  | 0 |
| 59-final-viral-combined_k141_15729   | [full]   | 3159  | No | NA | 0              | 2               | Not-determined | Genome-fragment | NA    | 0 |
| 511-final-viral-combined_k141_245289 | [full]   | 1042  | No | NA | 0              | 0               | Low-quality    | Genome-fragment | 2.06  | 0 |
| 59-final-viral-combined_k141_74040   | [full]   | 5315  | No | NA | 0              | 2               | Not-determined | Genome-fragment | NA    | 0 |
| 51-final-viral-combined_k141_34241   | [full]   | 1042  | No | NA | 0              | 0               | Low-quality    | Genome-fragment | 2.15  | 0 |
| 59-final-viral-combined_k141_10460   | [full]   | 3549  | No | NA | 0              | 0               | Not-determined | Genome-fragment | NA    | 0 |
| 51-final-viral-combined_k141_146027  | [full]   | 1042  | No | NA | 1              | 0               | Low-quality    | Genome-fragment | 2.36  | 0 |
| 59-final-viral-combined_k141_74063   | [full]   | 4092  | No | NA | 0              | 1               | Not-determined | Genome-fragment | NA    | 0 |
| 59-final-viral-combined_k141_21198   | [full]   | 1041  | No | NA | 0              | 1               | Not-determined | Genome-fragment | NA    | 0 |
| 59-final-viral-combined_k141_15776   | [full]   | 2609  | No | NA | 0              | 3               | Not-determined | Genome-fragment | NA    | 0 |
| 59-final-viral-combined_k141_26652   | [full]   | 13994 | No | NA | 0              | 4               | Not-determined | Genome-fragment | NA    | 0 |
| 59-final-viral-combined_k141_26654   | [full]   | 3200  | No | NA | 0              | 0               | Not-determined | Genome-fragment | NA    | 0 |
| 59-final-viral-combined_k141_26656   | [full]   | 1343  | No | NA | 0              | 0               | Not-determined | Genome-fragment | NA    | 0 |
| 59-final-viral-combined_k141_101270  | [full]   | 1105  | No | NA | 0              | 2               | Not-determined | Genome-fragment | NA    | 0 |
| 59-final-viral-combined_k141_26666   | [full]   | 2981  | No | NA | 0              | 3               | Not-determined | Genome-fragment | NA    | 0 |
| 59-final-viral-combined_k141_38608   | [full]   | 4746  | No | NA | 0              | 1               | Not-determined | Genome-fragment | NA    | 0 |
| 59-final-viral-combined_k141_47096   | [full]   | 1379  | No | NA | 0              | 1               | Not-determined | Genome-fragment | NA    | 0 |
| 59-final-viral-combined_k141_80036   | [full]   | 2664  | No | NA | 0              | 0               | Not-determined | Genome-fragment | NA    | 0 |
| 59-final-viral-combined_k141_35399   | [full]   | 1218  | No | NA | 0              | 0               | Not-determined | Genome-fragment | NA    | 0 |
| 51_k141_38                           |          | 1042  | No | NA | 0              | 1               | Low-quality    | Genome-fragment | 0.76  | 0 |
| 59-final-viral-combined_k141_74121   | [full]   | 2460  | No | NA | 0              | 1               | Not-determined | Genome-fragment | NA    | 0 |
| 55-final-viral-combined_k141_67484   | [full]   | 1042  | No | NA | 0              | 0               | Low-quality    | Genome-fragment | 0.63  | 0 |
| 59-final-viral-combined_k141_10518   | [full]   | 1133  | No | NA | 0              | 0               | Not-determined | Genome-fragment | NA    | 0 |
| 55-final-viral-combined_k141_64131   | [H2gene] | 1042  | No | NA | 1              | 0               | Low-quality</  |                 |       |   |



|                                      |           |       |     |    |       |    |                |                 |                 |       |       |
|--------------------------------------|-----------|-------|-----|----|-------|----|----------------|-----------------|-----------------|-------|-------|
| 59-final-viral-combined_k141_127273  | [full]    | 1035  | No  | NA | 0     | 2  | Not-determined | Genome-fragment | NA              | 0     | 0     |
| 59-final-viral-combined_k141_106166  | [full]    | 1679  | No  | NA | 0     | 0  | Not-determined | Genome-fragment | NA              | 0     | 0     |
| 59-final-viral-combined_k141_117152  | [full]    | 1720  | No  | NA | 0     | 0  | Not-determined | Genome-fragment | NA              | 0     | 0     |
| 59-final-viral-combined_k141_127281  | [full]    | 2522  | No  | NA | 0     | 3  | Not-determined | Genome-fragment | NA              | 0     | 0     |
| 59-final-viral-combined_k141_101551  | [full]    | 4535  | No  | NA | 0     | 0  | Not-determined | Genome-fragment | NA              | 0     | 0     |
| 511-final-viral-combined_k141_42362  | [full]    | 1043  | No  | NA | 0     | 0  | Low-quality    | Genome-fragment | NA              | 2.29  | 0     |
| 511-final-viral-combined_k141_329087 | [full]    | 1043  | No  | NA | 0     | 0  | Low-quality    | Genome-fragment | NA              | 2.11  | 0     |
| 511-final-viral-combined_k141_135144 | [H2gene]  | 1043  | No  | NA | 2     | 0  | Low-quality    | Genome-fragment | NA              | 1.68  | 0     |
| 51-final-viral-combined_k141_245604  | [H2gene]  | 1043  | No  | NA | 0     | 0  | Low-quality    | Genome-fragment | NA              | 20.33 | 0     |
| 55-final-viral-combined_k141_209279  | [full]    | 1043  | No  | NA | 0     | 0  | Low-quality    | Genome-fragment | NA              | 1.91  | 0     |
| 59-final-viral-combined_k141_95624   | [full]    | 3522  | No  | NA | 0     | 1  | Not-determined | Genome-fragment | NA              | 0     | 0     |
| 517-final-viral-combined_k141_200701 | [full]    | 1043  | No  | NA | 0     | 0  | Low-quality    | Genome-fragment | NA              | 2.64  | 0     |
| 517-final-viral-combined_k141_98610  | [H2gene]  | 1043  | No  | NA | 1     | 0  | Low-quality    | Genome-fragment | NA              | 0.63  | 0     |
| 59-final-viral-combined_k141_106258  | [full]    | 1149  | No  | NA | 0     | 0  | Not-determined | Genome-fragment | NA              | 0     | 0     |
| 59-final-viral-combined_k141_101002  | [full]    | 2492  | No  | NA | 0     | 1  | Not-determined | Genome-fragment | NA              | 0     | 0     |
| 512-final-viral-combined_k141_54795  | [full]    | 1043  | No  | NA | 0     | 0  | Low-quality    | Genome-fragment | NA              | 2.44  | 0     |
| 59-final-viral-combined_k141_127319  | [full]    | 7358  | No  | NA | 0     | 6  | Not-determined | Genome-fragment | NA              | 0     | 0     |
| 512-final-viral-combined_k141_229714 | [full]    | 1043  | No  | NA | 0     | 1  | Low-quality    | Genome-fragment | NA              | 0.65  | 0     |
| 52-final-viral-combined_k141_126549  | [full]    | 1042  | No  | NA | 0     | 0  | Low-quality    | Genome-fragment | NA              | 0.59  | 0     |
| 59-final-viral-combined_k141_31614   | [full]    | 2041  | No  | NA | 0     | 1  | Not-determined | Genome-fragment | NA              | 0     | 0     |
| 59-final-viral-combined_k141_42439   | [full]    | 1387  | No  | NA | 0     | 1  | Not-determined | Genome-fragment | NA              | 0     | 0     |
| 59-final-viral-combined_k141_106508  | [full]    | 3255  | No  | NA | 0     | 1  | Not-determined | Genome-fragment | NA              | 0     | 0     |
| 59-final-viral-combined_k141_31682   | [full]    | 2326  | No  | NA | 0     | 2  | Not-determined | Genome-fragment | NA              | 0     | 0     |
| 59-final-viral-combined_k141_110827  | [full]    | 3816  | No  | NA | 0     | 2  | Not-determined | Genome-fragment | NA              | 0     | 0     |
| 54-final-viral-combined_k141_30678   | [full]    | 1043  | No  | NA | 0     | 1  | Low-quality    | Genome-fragment | NA              | 0.38  | 0     |
| 59-final-viral-combined_k141_74484   | [full]    | 2643  | No  | NA | 0     | 2  | Not-determined | Genome-fragment | NA              | 0     | 0     |
| 56-final-viral-combined_k141_125401  | [full]    | 1043  | No  | NA | 3     | 0  | Low-quality    | Genome-fragment | NA              | 1.67  | 0     |
| 59-final-viral-combined_k141_110846  | [full]    | 5478  | No  | NA | 0     | 4  | Not-determined | Genome-fragment | NA              | 0     | 0     |
| 59-final-viral-combined_k141_106370  | [full]    | 2048  | No  | NA | 0     | 0  | Not-determined | Genome-fragment | NA              | 0     | 0     |
| 58-final-viral-combined_k141_237713  | [H2gene]  | 1043  | No  | NA | 1     | 0  | Low-quality    | Genome-fragment | NA              | 2.48  | 0     |
| 58_k141_267644                       | [full]    | 1043  | No  | NA | 1     | 0  | Low-quality    | Genome-fragment | NA              | 0.75  | 0     |
| 59-final-viral-combined_k141_48028   | [H2gene]  | 1044  | No  | NA | 1     | 0  | Low-quality    | Genome-fragment | NA              | 2.27  | 0     |
| 59-final-viral-combined_k141_110875  | [full]    | 1505  | No  | NA | 0     | 1  | Not-determined | Genome-fragment | NA              | 0     | 0     |
| 59-final-viral-combined_k141_47311   | [full]    | 1851  | No  | NA | 0     | 1  | Not-determined | Genome-fragment | NA              | 0     | 0     |
| 59-final-viral-combined_k141_74507   | [full]    | 3556  | No  | NA | 0     | 1  | Not-determined | Genome-fragment | NA              | 0     | 0     |
| 511-final-viral-combined_k141_95748  | [H2gene]  | 1044  | No  | NA | 0     | 0  | Low-quality    | Genome-fragment | NA              | 2.67  | 0     |
| 511_k141_310817                      | [full]    | 1044  | No  | NA | 0     | 0  | Low-quality    | Genome-fragment | NA              | 1.69  | 0     |
| 59-final-viral-combined_k141_110908  | [full]    | 5545  | No  | NA | 0     | 3  | Not-determined | Genome-fragment | NA              | 0     | 0     |
| 59-final-viral-combined_k141_47363   | [full]    | 1151  | No  | NA | 0     | 1  | Not-determined | Genome-fragment | NA              | 0     | 0     |
| 51-final-viral-combined_k141_159859  | [full]    | 1044  | No  | NA | 1     | 0  | Low-quality    | Genome-fragment | NA              | 2.11  | 0     |
| 55-final-viral-combined_k141_2706    | [full]    | 1044  | No  | NA | 1     | 0  | Low-quality    | Genome-fragment | NA              | 2.16  | 0     |
| 59-final-viral-combined_k141_117317  | [full]    | 1167  | No  | NA | 0     | 0  | Not-determined | Genome-fragment | NA              | 0     | 0     |
| 59-final-viral-combined_k141_95825   | [full]    | 1052  | No  | NA | 0     | 1  | Not-determined | Genome-fragment | NA              | 0     | 0     |
| 55-final-viral-combined_k141_203745  | [full]    | 1044  | No  | NA | 0     | 1  | Low-quality    | Genome-fragment | NA              | 0.66  | 0     |
| 517_k141_125977                      | [full]    | 1044  | No  | NA | 1     | 0  | Low-quality    | Genome-fragment | NA              | 2.1   | 0     |
| 59-final-viral-combined_k141_106504  | [full]    | 4219  | No  | NA | 0     | 1  | Not-determined | Genome-fragment | NA              | 0     | 0     |
| 512-final-viral-combined_k141_359752 | [H2gene]  | 1044  | No  | NA | 0     | 0  | Low-quality    | Genome-fragment | NA              | 2.13  | 0     |
| 52_k141_24686                        | [full]    | 1044  | No  | NA | 0     | 1  | Low-quality    | Genome-fragment | NA              | 0.69  | 0     |
| 59-final-viral-combined_k141_117424  | [full]    | 2978  | No  | NA | 0     | 1  | Not-determined | Genome-fragment | NA              | 0     | 0     |
| 54-final-viral-combined_k141_105304  | [full]    | 1044  | No  | NA | 1     | 0  | Low-quality    | Genome-fragment | NA              | 0.62  | 0     |
| 59-final-viral-combined_k141_110937  | [full]    | 1160  | No  | NA | 0     | 2  | Not-determined | Genome-fragment | NA              | 0     | 0     |
| 59-final-viral-combined_k141_95959   | [full]    | 2967  | No  | NA | 0     | 1  | Not-determined | Genome-fragment | NA              | 0     | 0     |
| 59-final-viral-combined_k141_106570  | [full]    | 1029  | No  | NA | 0     | 1  | Not-determined | Genome-fragment | NA              | 0     | 0     |
| 59-final-viral-combined_k141_96018   | [full]    | 4555  | No  | NA | 0     | 3  | Not-determined | Genome-fragment | NA              | 0     | 0     |
| 59-final-viral-combined_k141_106607  | [full]    | 3665  | No  | NA | 0     | 3  | Not-determined | Genome-fragment | NA              | 0     | 0     |
| 59-final-viral-combined_k141_106637  | [full]    | 3274  | No  | NA | 0     | 2  | Not-determined | Genome-fragment | NA              | 0     | 0     |
| 59-final-viral-combined_k141_111003  | [full]    | 1225  | No  | NA | 0     | 1  | Not-determined | Genome-fragment | NA              | 0     | 0     |
| 59-final-viral-combined_k141_127537  | [full]    | 3128  | No  | NA | 0     | 2  | Not-determined | Genome-fragment | NA              | 0     | 0     |
| 59-final-viral-combined_k141_127540  | [full]    | 1113  | No  | NA | 0     | 1  | Not-determined | Genome-fragment | NA              | 0     | 0     |
| 59-final-viral-combined_k141_127545  | [full]    | 2989  | No  | NA | 0     | 3  | Not-determined | Genome-fragment | NA              | 0     | 0     |
| 59-final-viral-combined_k141_106662  | [full]    | 2471  | No  | NA | 0     | 2  | Not-determined | Genome-fragment | NA              | 0     | 0     |
| 54_k141_73093                        | [full]    | 1044  | No  | NA | 0     | 0  | Low-quality    | Genome-fragment | NA              | 1.2   | 0     |
| 59-final-viral-combined_k141_42719   | [full]    | 4225  | No  | NA | 0     | 0  | Not-determined | Genome-fragment | NA              | 0     | 0     |
| 56-final-viral-combined_k141_104815  | [full]    | 1044  | No  | NA | 0     | 1  | Low-quality    | Genome-fragment | NA              | 1.7   | 0     |
| 59-final-viral-combined_k141_31834   | [full]    | 3549  | No  | NA | 0     | 0  | Not-determined | Genome-fragment | NA              | 0     | 0     |
| 59_k141_62479                        | [full]    | 1045  | No  | NA | 0     | 0  | Low-quality    | Genome-fragment | NA              | 2.8   | 0     |
| 511-final-viral-combined_k141_62145  | [H2gene]  | 1045  | No  | NA | 1     | 0  | Low-quality    | Genome-fragment | NA              | 2.45  | 0     |
| 511-final-viral-combined_k141_303018 | [H2gene]  | 1045  | No  | NA | 1     | 0  | Low-quality    | Genome-fragment | NA              | 19.47 | 0     |
| 59-final-viral-combined_k141_31854   | [full]    | 1155  | No  | NA | 0     | 1  | Not-determined | Genome-fragment | NA              | 0     | 0     |
| 511_k141_255351                      | [full]    | 1045  | No  | NA | 0     | 0  | Low-quality    | Genome-fragment | NA              | 0.68  | 0     |
| 51-final-viral-combined_k141_297508  | [full]    | 1045  | No  | NA | 1     | 0  | Low-quality    | Genome-fragment | NA              | 1.96  | 0     |
| 51-final-viral-combined_k141_335887  | [full]    | 1045  | No  | NA | 0     | 0  | Low-quality    | Genome-fragment | NA              | 1.8   | 0     |
| 51-final-viral-combined_k141_243642  | [full]    | 1045  | No  | NA | 0     | 0  | Low-quality    | Genome-fragment | NA              | 2.57  | 0     |
| 59-final-viral-combined_k141_106733  | [full]    | 1880  | No  | NA | 0     | 2  | Not-determined | Genome-fragment | NA              | 0     | 0     |
| 51-final-viral-combined_k141_111120  | [full]    | 1045  | No  | NA | 0     | 1  | Low-quality    | Genome-fragment | NA              | 1.76  | 0     |
| 59-final-viral-combined_k141_106751  | [full]    | 4826  | No  | NA | 0     | 2  | Not-determined | Genome-fragment | NA              | 0     | 0     |
| 55_k141_21553                        | [full]    | 1045  | No  | NA | 0     | 2  | Low-quality    | Genome-fragment | NA              | 3.44  | 0     |
| 517-final-viral-combined_k141_214599 | [full]    | 1045  | No  | NA | 0     | 0  | Low-quality    | Genome-fragment | NA              | 2.93  | 0     |
| 59-final-viral-combined_k141_127771  | [full]    | 2179  | No  | NA | 0     | 1  | Not-determined | Genome-fragment | NA              | 0     | 0     |
| 59-final-viral-combined_k141_111151  | [full]    | 1410  | No  | NA | 0     | 0  | Not-determined | Genome-fragment | NA              | 0     | 0     |
| 517-final-viral-combined_k141_195949 | [full]    | 1045  | No  | NA | 0     | 0  | Low-quality    | Genome-fragment | NA              | 0.78  | 0     |
| 512-final-viral-combined_k141_510001 | [full]    | 1045  | No  | NA | 0     | 0  | Low-quality    | Genome-fragment | NA              | 1.9   | 0     |
| 512-final-viral-combined_k141_133897 | [full]    | 1045  | No  | NA | 1     | 0  | Low-quality    | Genome-fragment | NA              | 1.67  | 0     |
| 59-final-viral-combined_k141_111171  | [full]    | 1739  | No  | NA | 0     | 2  | Not-determined | Genome-fragment | NA              | 0     | 0     |
| 59-final-viral-combined_k141_127801  | [full]    | 1005  | No  | NA | 0     | 1  | Not-determined | Genome-fragment | NA              | 0     | 0     |
| 512-final-viral-combined_k141_93914  | [H2gene]  | 1045  | No  | NA | 1     | 0  | Low-quality    | Genome-fragment | NA              | 2.91  | 0     |
| 59-final-viral-combined_k141_30227   | [full]    | 1929  | No  | NA | 0     | 0  | Not-determined | Genome-fragment | NA              | 0     | 0     |
| 512_k141_127957                      | [full]    | 1045  | No  | NA | 0     | 0  | Low-quality    | Genome-fragment | NA              | 0.57  | 0     |
| 59-final-viral-combined_k141_47774   | [full]    | 3253  | No  | NA | 0     | 1  | Not-determined | Genome-fragment | NA              | 0     | 0     |
| 59-final-viral-combined_k141_111201  | [full]    | 1334  | No  | NA | 0     | 0  | Not-determined | Genome-fragment | NA              | 0     | 0     |
| 59-final-viral-combined_k141_2086    | [full]    | 1575  | No  | NA | 0     | 1  | Not-determined | Genome-fragment | NA              | 0     | 0     |
| 512_k141_96585                       | [full]    | 1045  | No  | NA | 0     | 0  | Low-quality    | Genome-fragment | NA              | 2.04  | 0     |
| 52-final-viral-combined_k141_66574   | [H2gene]  | 1045  | No  | NA | 2     | 0  | Low-quality    | Genome-fragment | NA              | 2     | 0     |
| 59-final-viral-combined_k141_111243  | [full]    | 1673  | No  | NA | 0     | 2  | Not-determined | Genome-fragment | NA              | 0     | 0     |
| 52_k141_135819                       | [full]    | 1045  | No  | NA | 0     | 0  | Low-quality    | Genome-fragment | NA              | 1.33  | 0     |
| 52_k141_32438                        | [full]    | 1045  | No  | NA | 0     | 0  | Low-quality    | Genome-fragment | NA              | 1.75  | 0     |
| 59-final-viral-combined_k141_111336  | [full]    | 1995  | No  | NA | 0     | 1  | Not-determined | Genome-fragment | NA              | 0     | 0     |
| 54-final-viral-combined_k141_123810  | [H2gene]  | 1045  | No  | NA | 0     | 0  | Low-quality    | Genome-fragment | NA              | 2.53  | 0     |
| 59-final-viral-combined_k141_48020   | [full]    | 3739  | No  | NA | 0     | 2  | Not-determined | Genome-fragment | NA              | 0     | 0     |
| 59-final-viral-combined_k141_111515  | [full]    | 2295  | No  | NA | 0     | 0  | Not-determined | Genome-fragment | NA              | 0     | 0     |
| 58_k141_214262                       | [full]    | 1045  | No  | NA | 0     | 1  | Low-quality    | Genome-fragment | NA              | 2.13  | 0     |
| 59-final-viral-combined_k141_94387   | [full]    | 1046  | No  | NA | 0     | 0  | Low-quality    | Genome-fragment | NA              | 1.63  | 0     |
| 59_k141_78394                        | [full]    | 1046  | No  | NA | 0     | 0  | Low-quality    | Genome-fragment | NA              | 1.75  | 0     |
| 59-final-viral-combined_k141_111791  | [full]    | 2896  | No  | NA | 0     | 2  | Not-determined | Genome-fragment | NA              | 0     | 0     |
| 59-final-viral-combined_k141_111884  | [full]    | 1984  | No  | NA | 0     | 1  | Not-determined | Genome-fragment | NA              | 0     | 0     |
| 59-final-viral-combined_k141_111935  | [full]    | 3079  | No  | NA | 0     | 2  | Not-determined | Genome-fragment | NA              | 0     | 0     |
| 511-final-viral-combined_k141_127570 | [full]    | 1046  | No  | NA | 0     | 1  | Low-quality    | Genome-fragment | NA              | 0.44  | 0     |
| 59-final-viral-combined_k141_112067  | [full]    | 1840  | No  | NA | 0     | 1  | Not-determined | Genome-fragment | NA              | 0     | 0     |
| 511-final-viral-combined_k141_25848  | [full]    | 1046  | No  | NA | 0     | 0  | Low-quality    | Genome-fragment | NA              | 0.76  | 0     |
| 511-final-viral-combined_k141_82373  | [partial] | 1046  | No  | NA | 0     | 0  | Low-quality    | Genome-fragment | NA              | 2.78  | 0     |
| 59-final-viral-combined_k141_17587   | [partial] | 82228 | Yes | NA | 46493 | 10 | 17             | Medium-quality  | Genome-fragment | NA    | 85.36 |
| 59-final-viral-combined_k141_43101   | [partial] | 15458 | No  | NA | 0     | 0  | Not-determined | Genome-fragment | NA              | 43.46 | 0     |
| 59-final-viral-combined_k141_5526    | [partial] | 51870 | Yes | NA | 36902 | 7  | 16             | Medium-quality  | Genome-fragment | NA    | 66.25 |
| 51-final-viral-combined_k141_94277   | [full]    | 1046  | No  | NA | 0     | 0  | Low-quality    | Genome-fragment | NA              | 2.06  | 0     |
| 59-final-viral-combined_k141_1698    | [partial] | 14816 | No  | NA | 0     | 0  | Not-determined | Genome-fragment | NA              | 0     | 0     |
| 51-final-viral-combined_k141_164467  | [full]    | 1046  | No  | NA | 1     | 0  | Low-quality    | Genome-fragment | NA              | 2.57  | 0     |
| 51_k141_159538                       | [full]    | 1046  | No  | NA | 0     | 0  | Low-quality    | Genome-fragment | NA              | 2.54  | 0     |
| 55-final-viral-combined_k141_25072   | [H2gene]  | 1046  | No  | NA | 1     | 0  | Low-quality    | Genome-fragment | NA              | 0.56  | 0     |
| 59-final-viral-combined_k141_33229   | [partial] | 23899 | No  | NA | 10    | 0  | Medium-quality | Genome-fragment | NA              | 62.78 | 0     |
| 59-final-viral-combined_k141_4941    | [partial] | 19411 | No  | NA | 0     | 6  | Not-determined | Genome-fragment | NA              | 0     | 0     |
| 59-final-viral-combined_k141_44252   | [partial] | 19773 | No  | NA | 0     | 10 | Not            |                 |                 |       |       |



|                                      |      |    |    |   |   |                |                 |      |   |
|--------------------------------------|------|----|----|---|---|----------------|-----------------|------|---|
| S17_k141_80826                       | 1049 | No | NA | 0 | 0 | Low-quality    | Genome-fragment | 3.23 | 0 |
| S17_k141_59189                       | 1049 | No | NA | 0 | 0 | Low-quality    | Genome-fragment | 1.86 | 0 |
| S17_k141_17225                       | 1049 | No | NA | 1 | 0 | Low-quality    | Genome-fragment | 2.01 | 0 |
| S12_k141_192265                      | 1049 | No | NA | 0 | 0 | Low-quality    | Genome-fragment | 1.43 | 0 |
| S2-final-viral-combined_k141_210509  | 1049 | No | NA | 0 | 0 | Low-quality    | Genome-fragment | 2.7  | 0 |
| S2-final-viral-combined_k141_108558  | 1049 | No | NA | 0 | 0 | Low-quality    | Genome-fragment | 2.07 | 0 |
| S2-final-viral-combined_k141_108573  | 1049 | No | NA | 0 | 0 | Low-quality    | Genome-fragment | 2.08 | 0 |
| S2_k141_163296                       | 1049 | No | NA | 1 | 0 | Low-quality    | Genome-fragment | 15.7 | 0 |
| S4-final-viral-combined_k141_76065   | 1049 | No | NA | 0 | 0 | Low-quality    | Genome-fragment | 1.44 | 0 |
| S11-final-viral-combined_k141_213662 | 1050 | No | NA | 0 | 0 | Low-quality    | Genome-fragment | 1.95 | 0 |
| S11_k141_241660                      | 1050 | No | NA | 0 | 0 | Low-quality    | Genome-fragment | 2.62 | 0 |
| S11_k141_160266                      | 1050 | No | NA | 1 | 0 | Low-quality    | Genome-fragment | 2.07 | 0 |
| S1-final-viral-combined_k141_178240  | 1050 | No | NA | 1 | 0 | Low-quality    | Genome-fragment | 2.48 | 0 |
| S1-final-viral-combined_k141_243219  | 1050 | No | NA | 1 | 0 | Low-quality    | Genome-fragment | 1.74 | 0 |
| S3-final-viral-combined_k141_58118   | 1050 | No | NA | 1 | 0 | Low-quality    | Genome-fragment | 0.96 | 0 |
| S7_k141_185264                       | 1050 | No | NA | 1 | 0 | Low-quality    | Genome-fragment | 2.03 | 0 |
| S9-final-viral-combined_k141_23006   | 1314 | No | NA | 0 | 0 | Not-determined | Genome-fragment | NA   | 0 |
| S17_k141_28237                       | 1050 | No | NA | 0 | 1 | Low-quality    | Genome-fragment | 2.75 | 0 |
| S12-final-viral-combined_k141_46232  | 1050 | No | NA | 1 | 0 | Low-quality    | Genome-fragment | 2.37 | 0 |
| S12-final-viral-combined_k141_200616 | 1050 | No | NA | 2 | 0 | Low-quality    | Genome-fragment | 2.32 | 0 |
| S2-final-viral-combined_k141_207420  | 1050 | No | NA | 0 | 0 | Low-quality    | Genome-fragment | 1.89 | 0 |
| S6-final-viral-combined_k141_44630   | 1050 | No | NA | 0 | 0 | Low-quality    | Genome-fragment | 4.12 | 0 |
| S8_k141_69815                        | 1050 | No | NA | 1 | 0 | Low-quality    | Genome-fragment | 2.41 | 0 |
| S1-final-viral-combined_k141_174246  | 1051 | No | NA | 1 | 0 | Low-quality    | Genome-fragment | 2.68 | 0 |
| S5-final-viral-combined_k141_37104   | 1051 | No | NA | 1 | 0 | Low-quality    | Genome-fragment | 2.07 | 0 |
| S5-final-viral-combined_k141_150157  | 1051 | No | NA | 0 | 0 | Low-quality    | Genome-fragment | 1.76 | 0 |
| S5-final-viral-combined_k141_35794   | 1051 | No | NA | 0 | 1 | Low-quality    | Genome-fragment | 1.43 | 0 |
| S17_k141_262360                      | 1051 | No | NA | 0 | 0 | Low-quality    | Genome-fragment | 1.97 | 0 |
| S12-final-viral-combined_k141_21768  | 1051 | No | NA | 0 | 0 | Low-quality    | Genome-fragment | 1.75 | 0 |
| S4-final-viral-combined_k141_25324   | 1051 | No | NA | 0 | 0 | Low-quality    | Genome-fragment | 1.62 | 0 |
| S8-final-viral-combined_k141_244643  | 1051 | No | NA | 0 | 0 | Low-quality    | Genome-fragment | 0.77 | 0 |
| S9-final-viral-combined_k141_103736  | 1158 | No | NA | 1 | 0 | Not-determined | Genome-fragment | NA   | 0 |
| S8-final-viral-combined_k141_54304   | 1051 | No | NA | 0 | 0 | Low-quality    | Genome-fragment | 1.44 | 0 |
| S8_k141_126400                       | 1051 | No | NA | 0 | 0 | Low-quality    | Genome-fragment | 1.74 | 0 |
| S9-final-viral-combined_k141_66679   | 1052 | No | NA | 0 | 0 | Low-quality    | Genome-fragment | 2.53 | 0 |
| S9_k141_31178                        | 1052 | No | NA | 1 | 0 | Low-quality    | Genome-fragment | 1.42 | 0 |
| S11_k141_196535                      | 1052 | No | NA | 0 | 0 | Low-quality    | Genome-fragment | 1.98 | 0 |
| S3-final-viral-combined_k141_3448    | 1052 | No | NA | 0 | 0 | Low-quality    | Genome-fragment | 1.68 | 0 |
| S3-final-viral-combined_k141_4994    | 1052 | No | NA | 0 | 0 | Low-quality    | Genome-fragment | 2.17 | 0 |
| S5-final-viral-combined_k141_200618  | 1052 | No | NA | 1 | 0 | Low-quality    | Genome-fragment | 2.55 | 0 |
| S7-final-viral-combined_k141_93489   | 1052 | No | NA | 0 | 0 | Low-quality    | Genome-fragment | 1.33 | 0 |
| S9-final-viral-combined_k141_93188   | 2167 | No | NA | 0 | 0 | Not-determined | Genome-fragment | NA   | 0 |
| S7-final-viral-combined_k141_8725    | 1052 | No | NA | 0 | 0 | Low-quality    | Genome-fragment | 2.05 | 0 |
| S17-final-viral-combined_k141_22787  | 1052 | No | NA | 1 | 0 | Low-quality    | Genome-fragment | 3.04 | 0 |
| S17-final-viral-combined_k141_58063  | 1052 | No | NA | 2 | 0 | Low-quality    | Genome-fragment | 1.9  | 0 |
| S17-final-viral-combined_k141_137374 | 1052 | No | NA | 0 | 0 | Low-quality    | Genome-fragment | 2.43 | 0 |
| S17-final-viral-combined_k141_49364  | 1052 | No | NA | 0 | 0 | Low-quality    | Genome-fragment | 2.06 | 0 |
| S17_k141_169645                      | 1052 | No | NA | 0 | 0 | Low-quality    | Genome-fragment | 1.25 | 0 |
| S12_k141_27011                       | 1052 | No | NA | 0 | 0 | Low-quality    | Genome-fragment | 2.17 | 0 |
| S2_k141_144452                       | 1052 | No | NA | 0 | 0 | Low-quality    | Genome-fragment | 0.48 | 0 |
| S2_k141_133307                       | 1052 | No | NA | 0 | 0 | Low-quality    | Genome-fragment | 2.92 | 0 |
| S6-final-viral-combined_k141_30548   | 1052 | No | NA | 0 | 0 | Low-quality    | Genome-fragment | 2.94 | 0 |
| S8-final-viral-combined_k141_104886  | 1052 | No | NA | 1 | 0 | Low-quality    | Genome-fragment | 2.69 | 0 |
| S11-final-viral-combined_k141_308804 | 1053 | No | NA | 0 | 0 | Low-quality    | Genome-fragment | 1.99 | 0 |
| S11-final-viral-combined_k141_325920 | 1053 | No | NA | 0 | 0 | Low-quality    | Genome-fragment | 2.49 | 0 |
| S11-final-viral-combined_k141_301515 | 1053 | No | NA | 0 | 0 | Low-quality    | Genome-fragment | 2.48 | 0 |
| S11_k141_278563                      | 1053 | No | NA | 0 | 0 | Low-quality    | Genome-fragment | 1.96 | 0 |
| S11_k141_226113                      | 1053 | No | NA | 0 | 0 | Low-quality    | Genome-fragment | 2.9  | 0 |
| S1-final-viral-combined_k141_151614  | 1053 | No | NA | 0 | 2 | Low-quality    | Genome-fragment | 0.78 | 0 |
| S1-final-viral-combined_k141_188168  | 1053 | No | NA | 0 | 0 | Low-quality    | Genome-fragment | 2.92 | 0 |
| S9-final-viral-combined_k141_9291    | 1485 | No | NA | 0 | 0 | Not-determined | Genome-fragment | NA   | 0 |
| S9-final-viral-combined_k141_46147   | 1402 | No | NA | 0 | 1 | Not-determined | Genome-fragment | NA   | 0 |
| S1_k141_188431                       | 1053 | No | NA | 0 | 1 | Low-quality    | Genome-fragment | 0.49 | 0 |
| S5_k141_148552                       | 1053 | No | NA | 1 | 0 | Low-quality    | Genome-fragment | 2.26 | 0 |
| S7-final-viral-combined_k141_137255  | 1053 | No | NA | 1 | 0 | Low-quality    | Genome-fragment | 1.95 | 0 |
| S7-final-viral-combined_k141_130441  | 1053 | No | NA | 2 | 0 | Low-quality    | Genome-fragment | 0.79 | 0 |
| S9-final-viral-combined_k141_72790   | 1816 | No | NA | 0 | 0 | Not-determined | Genome-fragment | NA   | 0 |
| S17-final-viral-combined_k141_245381 | 1053 | No | NA | 0 | 0 | Low-quality    | Genome-fragment | 1.82 | 0 |
| S12-final-viral-combined_k141_181631 | 1053 | No | NA | 0 | 0 | Low-quality    | Genome-fragment | 0.6  | 0 |
| S12-final-viral-combined_k141_234346 | 1053 | No | NA | 1 | 0 | Low-quality    | Genome-fragment | 2.15 | 0 |
| S2-final-viral-combined_k141_171111  | 1053 | No | NA | 1 | 0 | Low-quality    | Genome-fragment | 2.61 | 0 |
| S2-final-viral-combined_k141_214765  | 1053 | No | NA | 1 | 0 | Low-quality    | Genome-fragment | 0.48 | 0 |
| S2-final-viral-combined_k141_170854  | 1053 | No | NA | 1 | 0 | Low-quality    | Genome-fragment | 2.98 | 0 |
| S4_k141_115323                       | 1053 | No | NA | 0 | 0 | Low-quality    | Genome-fragment | 0.93 | 0 |
| S8-final-viral-combined_k141_23697   | 1053 | No | NA | 0 | 0 | Low-quality    | Genome-fragment | 0.93 | 0 |
| S9-final-viral-combined_k141_52810   | 2091 | No | NA | 0 | 0 | Not-determined | Genome-fragment | NA   | 0 |
| S8-final-viral-combined_k141_191056  | 1053 | No | NA | 0 | 0 | Low-quality    | Genome-fragment | 2.48 | 0 |
| S8-final-viral-combined_k141_215251  | 1053 | No | NA | 0 | 0 | Low-quality    | Genome-fragment | 2.08 | 0 |
| S1-final-viral-combined_k141_387261  | 1054 | No | NA | 0 | 0 | Low-quality    | Genome-fragment | 2.48 | 0 |
| S1-final-viral-combined_k141_377851  | 1054 | No | NA | 0 | 0 | Low-quality    | Genome-fragment | 2.05 | 0 |
| S5-final-viral-combined_k141_130839  | 1054 | No | NA | 1 | 0 | Low-quality    | Genome-fragment | 2.44 | 0 |
| S17-final-viral-combined_k141_63866  | 1054 | No | NA | 1 | 0 | Low-quality    | Genome-fragment | 1.92 | 0 |
| S17-final-viral-combined_k141_241837 | 1054 | No | NA | 1 | 0 | Low-quality    | Genome-fragment | 2.82 | 0 |
| S12-final-viral-combined_k141_13200  | 1054 | No | NA | 1 | 0 | Low-quality    | Genome-fragment | 2.54 | 0 |
| S12_k141_385619                      | 1054 | No | NA | 1 | 0 | Low-quality    | Genome-fragment | 2.23 | 0 |
| S9-final-viral-combined_k141_58343   | 1520 | No | NA | 0 | 0 | Not-determined | Genome-fragment | NA   | 0 |
| S4-final-viral-combined_k141_121588  | 1054 | No | NA | 2 | 0 | Low-quality    | Genome-fragment | 0.39 | 0 |
| S4_k141_76767                        | 1054 | No | NA | 1 | 0 | Low-quality    | Genome-fragment | 1.06 | 0 |
| S6-final-viral-combined_k141_99443   | 1054 | No | NA | 0 | 0 | Low-quality    | Genome-fragment | 0.47 | 0 |
| S6-final-viral-combined_k141_74481   | 1054 | No | NA | 1 | 0 | Low-quality    | Genome-fragment | 3.88 | 0 |
| S8-final-viral-combined_k141_202649  | 1054 | No | NA | 0 | 0 | Low-quality    | Genome-fragment | 2.29 | 0 |
| S8-final-viral-combined_k141_135778  | 1054 | No | NA | 0 | 0 | Low-quality    | Genome-fragment | 1.43 | 0 |
| S8_k141_152419                       | 1054 | No | NA | 1 | 0 | Low-quality    | Genome-fragment | 0.93 | 0 |
| S9_k141_112305                       | 3113 | No | NA | 0 | 0 | Not-determined | Genome-fragment | NA   | 0 |
| S9_k141_122993                       | 8129 | No | NA | 0 | 1 | Not-determined | Genome-fragment | NA   | 0 |
| S9_k141_53485                        | 1440 | No | NA | 0 | 0 | Not-determined | Genome-fragment | NA   | 0 |
| S9_k141_106986                       | 1614 | No | NA | 0 | 0 | Not-determined | Genome-fragment | NA   | 0 |
| S9_k141_101639                       | 1372 | No | NA | 0 | 1 | Not-determined | Genome-fragment | NA   | 0 |
| S9_k141_112338                       | 1072 | No | NA | 0 | 1 | Not-determined | Genome-fragment | NA   | 0 |
| S9_k141_10739                        | 1112 | No | NA | 0 | 0 | Not-determined | Genome-fragment | NA   | 0 |
| S11-final-viral-combined_k141_58489  | 1055 | No | NA | 0 | 0 | Low-quality    | Genome-fragment | 0.68 | 0 |
| S9_k141_64239                        | 1117 | No | NA | 0 | 0 | Not-determined | Genome-fragment | NA   | 0 |
| S9_k141_10765                        | 2555 | No | NA | 0 | 1 | Not-determined | Genome-fragment | NA   | 0 |
| S11-final-viral-combined_k141_91999  | 1055 | No | NA | 0 | 0 | Low-quality    | Genome-fragment | 1.5  | 0 |
| S9_k141_97                           | 1094 | No | NA | 0 | 1 | Not-determined | Genome-fragment | NA   | 0 |
| S11-final-viral-combined_k141_301696 | 1055 | No | NA | 1 | 0 | Low-quality    | Genome-fragment | 3.01 | 0 |
| S1_k141_285035                       | 1055 | No | NA | 0 | 1 | Low-quality    | Genome-fragment | 0.1  | 0 |
| S9_k141_48218                        | 3813 | No | NA | 0 | 3 | Not-determined | Genome-fragment | NA   | 0 |
| S3-final-viral-combined_k141_62294   | 1055 | No | NA | 0 | 0 | Low-quality    | Genome-fragment | 2.39 | 0 |
| S5-final-viral-combined_k141_145529  | 1055 | No | NA | 1 | 0 | Low-quality    | Genome-fragment | 3.06 | 0 |
| S9_k141_21476                        | 9252 | No | NA | 0 | 1 | Not-determined | Genome-fragment | NA   | 0 |
| S9_k141_37559                        | 1304 | No | NA | 0 | 0 | Not-determined | Genome-fragment | NA   | 0 |
| S9_k141_183                          | 4319 | No | NA | 0 | 1 | Not-determined | Genome-fragment | NA   | 0 |
| S9_k141_74993                        | 2033 | No | NA | 0 | 1 | Not-determined | Genome-fragment | NA   | 0 |
| S9_k141_197                          | 2199 | No | NA | 0 | 1 | Not-determined | Genome-fragment | NA   | 0 |
| S9_k141_112490                       | 2523 | No | NA | 0 | 1 | Not-determined | Genome-fragment | NA   | 0 |
| S9_k141_117800                       | 1795 | No | NA | 0 | 2 | Not-determined | Genome-fragment | NA   | 0 |
| S9_k141_69615                        | 2008 | No | NA | 0 | 0 | Not-determined | Genome-fragment | NA   | 0 |
| S9_k141_32038                        | 1323 | No | NA | 0 | 0 | Not-determined | Genome-fragment | NA   | 0 |
| S5_k141_152706                       | 1055 | No | NA | 0 | 0 | Low-quality    | Genome-fragment | 1.38 | 0 |
| S9-final-viral-combined_k141_169125  | 1055 | No | NA | 0 | 1 | Low-quality    | Genome-fragment | 1.64 | 0 |
| S9_k141_267                          | 3385 | No | NA | 0 | 1 | Not-determined | Genome-fragment | NA   | 0 |
| S9_k141_112569                       | 2011 | No | NA | 0 | 2 | Not-determined | Genome-fragment | NA   | 0 |
| S7-final-viral-combined_k141_190750  | 1055 | No | NA | 0 | 0 | Low-quality    | Genome-fragment | 2.5  | 0 |
| S9_k141_48216                        | 2348 | No | NA | 0 | 1 | Not-determined | Genome-fragment | NA   | 0 |
| S7_k141_5065                         | 1055 | No | NA | 0 | 1 | Low-quality    | Genome-fragment | 0.67 | 0 |
| S9_k141_117823                       | 1373 | No | NA | 0 | 1 | Not-determined | Genome-fragment | NA   | 0 |
| S17_k141_45507                       | 1055 | No | NA | 0 | 0 | Low-quality    | Genome-fragment | 1.64 | 0 |
| S9_k141_59026                        | 1149 | No | NA | 0 | 0 | Not-determined | Genome-fragment | NA   | 0 |
| S9_k141_101841                       | 3731 | No | NA | 0 | 0 | Not-determined | Genome-fragment | NA   | 0 |
| S12_k141_215280                      | 1055 | No | NA | 1 | 0 | Low-quality    | Genome-fragment | 0.57 | 0 |
| S2-final-viral-combined_k141_1668    | 1055 | No | NA | 0 | 1 | Low-quality    | Genome-fragment | 1.96 | 0 |
| S9_k141_75180                        | 1973 | No | NA | 0 | 1 | Not-determined | Genome-fragment | NA   | 0 |
| S9_k141_101845                       | 3595 | No | NA | 0 | 2 | Not-determined | Genome-fragment | NA   | 0 |
| S9_k141_36501                        | 1266 | No | NA | 0 | 1 | Not-determined | Genome-fragment | NA   | 0 |
| S4-final-viral-combined_k141_75388   | 1055 | No | NA | 0 | 0 | Low-quality    | Genome-fragment | 2.52 | 0 |
| S8-final-viral-combined_k141_60335   | 1055 | No | NA | 1 | 0 | Low-quality    | Genome-fragment | 2.27 | 0 |
| S9_k141_27022                        | 1219 | No | NA | 0 | 0 | Not-determined | Genome-fragment | NA   | 0 |
| S9_k141_117902                       | 2257 | No | NA | 0 | 2 | Not-determined | Genome-fragment | NA   | 0 |
| S8-final-viral-combined_k141_182756  | 1055 | No | NA | 1 | 0 | Low-quality    | Genome-fragment | 2.09 | 0 |
| S9_k141_101876                       | 6057 | No | NA |   |   |                |                 |      |   |



|                                              |          |     |   |                   |                 |       |       |
|----------------------------------------------|----------|-----|---|-------------------|-----------------|-------|-------|
| 59_k141_59317                                | 1501 No  | NA  | 0 | 1 Not-determined  | Genome-fragment | NA    | 0     |
| 59_k141_48692                                | 2306 No  | NA  | 0 | 1 Not-determined  | Genome-fragment | NA    | 0     |
| 59_k141_107209                               | 4298 No  | NA  | 0 | 1 Not-determined  | Genome-fragment | NA    | 0     |
| 54_k141_2243                                 | 1056 No  | NA  | 0 | 1 Low-quality     | Genome-fragment | 2.37  | 0     |
| 59_k141_48699                                | 5833 No  | NA  | 0 | 3 Not-determined  | Genome-fragment | NA    | 0     |
| 59_k141_21434                                | 1057 No  | NA  | 0 | 0 Low-quality     | Genome-fragment | 0.97  | 0     |
| 511-final-viral-combined_k141_138489  full   | 1057 No  | NA  | 1 | 0 Low-quality     | Genome-fragment | 1.3   | 0     |
| 59_k141_86102                                | 1486 No  | NA  | 0 | 2 Not-determined  | Genome-fragment | NA    | 0     |
| 59_k141_43271                                | 2154 No  | NA  | 0 | 1 Not-determined  | Genome-fragment | NA    | 0     |
| 59_k141_37805                                | 1106 No  | NA  | 0 | 1 Not-determined  | Genome-fragment | NA    | 0     |
| 59_k141_123378                               | 1295 No  | NA  | 0 | 1 Not-determined  | Genome-fragment | NA    | 0     |
| 59_k141_43281                                | 1445 No  | NA  | 0 | 0 Not-determined  | Genome-fragment | NA    | 0     |
| 59_k141_32452                                | 2186 No  | NA  | 0 | 0 Not-determined  | Genome-fragment | NA    | 0     |
| 511-final-viral-combined_k141_183264  full   | 1057 No  | NA  | 0 | 2 Low-quality     | Genome-fragment | 0.51  | 0     |
| 512-final-viral-combined_k141_134958  full   | 1057 No  | NA  | 0 | 0 Low-quality     | Genome-fragment | 3.17  | 0     |
| 59_k141_37826                                | 4171 No  | NA  | 1 | 0 Not-determined  | Genome-fragment | NA    | 0     |
| 59_k141_80781                                | 1126 No  | NA  | 0 | 1 Not-determined  | Genome-fragment | NA    | 0     |
| 51_k141_318752                               | 1057 No  | NA  | 0 | 1 Low-quality     | Genome-fragment | 2.77  | 0     |
| 59_k141_86196                                | 1488 No  | NA  | 0 | 1 Not-determined  | Genome-fragment | NA    | 0     |
| 59_k141_118238                               | 4356 No  | NA  | 0 | 2 Not-determined  | Genome-fragment | NA    | 0     |
| 59_k141_80803                                | 2123 No  | NA  | 0 | 0 Not-determined  | Genome-fragment | NA    | 0     |
| 59_k141_107272                               | 1775 No  | NA  | 0 | 2 Not-determined  | Genome-fragment | NA    | 0     |
| 59_k141_37869                                | 3947 No  | NA  | 0 | 1 Not-determined  | Genome-fragment | NA    | 0     |
| 59_k141_5775                                 | 1879 No  | NA  | 0 | 1 Not-determined  | Genome-fragment | NA    | 0     |
| 59_k141_80830                                | 7294 No  | NA  | 0 | 3 Not-determined  | Genome-fragment | NA    | 0     |
| 59_k141_123395                               | 5834 No  | NA  | 0 | 1 Not-determined  | Genome-fragment | NA    | 0     |
| 59_k141_80854                                | 4924 No  | NA  | 0 | 2 Not-determined  | Genome-fragment | NA    | 0     |
| 59_k141_789                                  | 1830 No  | NA  | 0 | 0 Not-determined  | Genome-fragment | NA    | 0     |
| 51_k141_108947                               | 1057 No  | NA  | 0 | 0 Low-quality     | Genome-fragment | 2.45  | 0     |
| 57_k141_209108                               | 1057 No  | NA  | 0 | 0 Low-quality     | Genome-fragment | 5.04  | 0     |
| 57_k141_15667                                | 1057 No  | NA  | 0 | 0 Low-quality     | Genome-fragment | 2.33  | 0     |
| 59_k141_59493                                | 1454 No  | NA  | 0 | 0 Not-determined  | Genome-fragment | NA    | 0     |
| 57_k141_224227                               | 1057 No  | NA  | 0 | 0 Low-quality     | Genome-fragment | 0.76  | 0     |
| 59_k141_97062                                | 2878 No  | NA  | 0 | 2 Not-determined  | Genome-fragment | NA    | 0     |
| 512-final-viral-combined_k141_35943  H2gene  | 1057 No  | NA  | 1 | 0 Low-quality     | Genome-fragment | 0.94  | 0     |
| 59_k141_43428                                | 1381 No  | NA  | 0 | 0 Not-determined  | Genome-fragment | NA    | 0     |
| 59_k141_37964                                | 1108 No  | NA  | 0 | 0 Not-determined  | Genome-fragment | NA    | 0     |
| 59_k141_59591                                | 1319 No  | NA  | 0 | 2 Not-determined  | Genome-fragment | NA    | 0     |
| 59_k141_54007                                | 2761 No  | NA  | 0 | 1 Not-determined  | Genome-fragment | NA    | 0     |
| 59_k141_86296                                | 1078 No  | NA  | 0 | 1 Not-determined  | Genome-fragment | NA    | 0     |
| 512-final-viral-combined_k141_311249  H2gene | 1057 No  | NA  | 1 | 0 Low-quality     | Genome-fragment | 2.39  | 0     |
| 512-final-viral-combined_k141_20708  H2gene  | 1057 No  | NA  | 1 | 0 Low-quality     | Genome-fragment | 1.54  | 0     |
| 59_k141_11080                                | 1000 No  | NA  | 0 | 0 Not-determined  | Genome-fragment | NA    | 0     |
| 59_k141_11081                                | 1029 No  | NA  | 0 | 1 Not-determined  | Genome-fragment | NA    | 0     |
| 54-final-viral-combined_k141_68479  full     | 1057 No  | NA  | 0 | 0 Low-quality     | Genome-fragment | 2.77  | 0     |
| 59_k141_80996                                | 4337 No  | NA  | 0 | 0 Not-determined  | Genome-fragment | NA    | 0     |
| 56_k141_58266                                | 1057 No  | NA  | 0 | 2 Low-quality     | Genome-fragment | 0.37  | 0     |
| 59_k141_123446                               | 2023 No  | NA  | 0 | 1 Not-determined  | Genome-fragment | NA    | 0     |
| 59_k141_118421                               | 2030 No  | NA  | 0 | 0 Not-determined  | Genome-fragment | NA    | 0     |
| 59_k141_5951                                 | 5033 No  | NA  | 0 | 0 Not-determined  | Genome-fragment | NA    | 0     |
| 59_k141_59618                                | 3377 No  | NA  | 0 | 1 Not-determined  | Genome-fragment | NA    | 0     |
| 59_k141_5959                                 | 1090 No  | NA  | 0 | 1 Not-determined  | Genome-fragment | NA    | 0     |
| 59_k141_951                                  | 1641 No  | NA  | 0 | 1 Not-determined  | Genome-fragment | NA    | 0     |
| 59_k141_953                                  | 2140 No  | NA  | 0 | 0 Not-determined  | Genome-fragment | NA    | 0     |
| 59_k141_598                                  | 1229 No  | NA  | 0 | 1 Not-determined  | Genome-fragment | NA    | 0     |
| 59_k141_971                                  | 9933 No  | NA  | 0 | 1 Not-determined  | Genome-fragment | NA    | 0     |
| 59_k141_123492                               | 11321 No | NA  | 0 | 14 Not-determined | Genome-fragment | NA    | 0     |
| 59_k141_04706                                | 4164 No  | NA  | 0 | 0 Not-determined  | Genome-fragment | NA    | 0     |
| 59_k141_11095                                | 6723 No  | NA  | 0 | 1 Not-determined  | Genome-fragment | NA    | 0     |
| 58_k141_181469                               | 1057 No  | NA  | 0 | 0 Low-quality     | Genome-fragment | 0.69  | 0     |
| 58_k141_8344                                 | 1057 No  | NA  | 0 | 0 Low-quality     | Genome-fragment | 1.06  | 0     |
| 59-final-viral-combined_k141_6290  full      | 1058 No  | NA  | 1 | 0 Low-quality     | Genome-fragment | 3.03  | 0     |
| 59_k141_102486                               | 1073 No  | NA  | 0 | 0 Not-determined  | Genome-fragment | NA    | 0     |
| 511-final-viral-combined_k141_65965  full    | 1058 No  | NA  | 0 | 1 Low-quality     | Genome-fragment | 0.55  | 0     |
| 59_k141_91279                                | 4998 No  | NA  | 0 | 0 Not-determined  | Genome-fragment | NA    | 0     |
| 59_k141_69979                                | 1195 No  | NA  | 0 | 0 Not-determined  | Genome-fragment | NA    | 0     |
| 51-final-viral-combined_k141_142819  full    | 1058 No  | NA  | 0 | 2 Low-quality     | Genome-fragment | 0.38  | 0     |
| 59_k141_118481                               | 1311 No  | NA  | 0 | 0 Not-determined  | Genome-fragment | NA    | 0     |
| 51-final-viral-combined_k141_96163  full     | 1058 No  | NA  | 2 | 0 Low-quality     | Genome-fragment | 2.92  | 0     |
| 59_k141_102542                               | 3076 No  | NA  | 0 | 2 Not-determined  | Genome-fragment | NA    | 0     |
| 59_k141_123545                               | 1038 No  | NA  | 0 | 1 Not-determined  | Genome-fragment | NA    | 0     |
| 51_k141_68868                                | 1058 No  | NA  | 0 | 0 Low-quality     | Genome-fragment | 0.86  | 0     |
| 59_k141_48989                                | 1571 No  | NA  | 0 | 1 Not-determined  | Genome-fragment | NA    | 0     |
| 53-final-viral-combined_k141_89943  full     | 1058 No  | NA  | 0 | 0 Low-quality     | Genome-fragment | 2.09  | 0     |
| 53-final-viral-combined_k141_33719  full     | 1058 No  | NA  | 0 | 0 Low-quality     | Genome-fragment | 0.73  | 0     |
| 55-final-viral-combined_k141_201112  full    | 1058 No  | NA  | 0 | 1 Low-quality     | Genome-fragment | 0.58  | 0     |
| 59_k141_27452                                | 3548 No  | NA  | 0 | 1 Not-determined  | Genome-fragment | NA    | 0     |
| 59_k141_91499                                | 1578 No  | NA  | 0 | 0 Not-determined  | Genome-fragment | NA    | 0     |
| 59_k141_31850                                | 1404 No  | NA  | 0 | 0 Not-determined  | Genome-fragment | NA    | 0     |
| 59_k141_38162                                | 1172 No  | NA  | 0 | 1 Not-determined  | Genome-fragment | NA    | 0     |
| 59_k141_97227                                | 1359 No  | NA  | 0 | 1 Not-determined  | Genome-fragment | NA    | 0     |
| 59_k141_1205                                 | 1415 No  | NA  | 0 | 1 Not-determined  | Genome-fragment | NA    | 0     |
| 59_k141_38166                                | 1652 No  | NA  | 0 | 1 Not-determined  | Genome-fragment | NA    | 0     |
| 59_k141_38172                                | 1033 No  | NA  | 0 | 0 Not-determined  | Genome-fragment | NA    | 0     |
| 55-final-viral-combined_k141_76987  full     | 1058 No  | NA  | 1 | 0 Low-quality     | Genome-fragment | 7.84  | 0     |
| 59_k141_22024                                | 1575 No  | NA  | 0 | 1 Not-determined  | Genome-fragment | NA    | 0     |
| 59_k141_97251                                | 1475 No  | NA  | 0 | 0 Not-determined  | Genome-fragment | NA    | 0     |
| 59_k141_22027                                | 4155 No  | NA  | 0 | 1 Not-determined  | Genome-fragment | NA    | 0     |
| 59_k141_22030                                | 5466 No  | NA  | 0 | 1 Not-determined  | Genome-fragment | NA    | 0     |
| 59_k141_86492                                | 1424 No  | NA  | 0 | 0 Not-determined  | Genome-fragment | NA    | 0     |
| 55-final-viral-combined_k141_68012  full     | 1058 No  | NA  | 2 | 0 Low-quality     | Genome-fragment | 1.79  | 0     |
| 59_k141_81301                                | 4909 No  | NA  | 0 | 0 Not-determined  | Genome-fragment | NA    | 0     |
| 59_k141_59749                                | 2284 No  | NA  | 0 | 2 Not-determined  | Genome-fragment | NA    | 0     |
| 59_k141_118569                               | 5511 No  | NA  | 0 | 3 Not-determined  | Genome-fragment | NA    | 0     |
| 57-final-viral-combined_k141_205129  full    | 1058 No  | NA  | 0 | 0 Low-quality     | Genome-fragment | 2.63  | 0     |
| 59_k141_123637                               | 1066 No  | NA  | 0 | 1 Not-determined  | Genome-fragment | NA    | 0     |
| 59_k141_59772                                | 1037 No  | NA  | 0 | 0 Not-determined  | Genome-fragment | NA    | 0     |
| 59_k141_123663                               | 1024 No  | NA  | 0 | 1 Not-determined  | Genome-fragment | NA    | 0     |
| 59_k141_34171                                | 1175 No  | NA  | 0 | 2 Not-determined  | Genome-fragment | NA    | 0     |
| 57-final-viral-combined_k141_288295  full    | 1058 No  | NA  | 0 | 0 Low-quality     | Genome-fragment | 0.58  | 0     |
| 59_k141_123693                               | 1430 No  | NA  | 0 | 1 Not-determined  | Genome-fragment | NA    | 0     |
| 59_k141_86539                                | 1319 No  | NA  | 0 | 1 Not-determined  | Genome-fragment | NA    | 0     |
| 57-final-viral-combined_k141_118290  full    | 1058 Yes | 794 | 1 | 1 Low-quality     | Genome-fragment | 1.11  | 24.95 |
| 57_k141_14923                                | 1058 No  | NA  | 0 | 1 Low-quality     | Genome-fragment | 1.65  | 0     |
| 59_k141_6049                                 | 1095 No  | NA  | 0 | 1 Not-determined  | Genome-fragment | NA    | 0     |
| 59_k141_1336                                 | 1152 No  | NA  | 0 | 1 Not-determined  | Genome-fragment | NA    | 0     |
| 59_k141_1339                                 | 1223 No  | NA  | 0 | 1 Not-determined  | Genome-fragment | NA    | 0     |
| 59_k141_64874                                | 1571 No  | NA  | 0 | 0 Not-determined  | Genome-fragment | NA    | 0     |
| 512-final-viral-combined_k141_234699  full   | 1058 No  | NA  | 0 | 0 Low-quality     | Genome-fragment | 2.37  | 0     |
| 512-final-viral-combined_k141_335766  full   | 1058 No  | NA  | 0 | 1 Low-quality     | Genome-fragment | 1.23  | 0     |
| 59_k141_86600                                | 1035 No  | NA  | 0 | 4 Not-determined  | Genome-fragment | NA    | 0     |
| 59_k141_54302                                | 1355 No  | NA  | 0 | 1 Not-determined  | Genome-fragment | NA    | 0     |
| 512-final-viral-combined_k141_52191  full    | 1058 No  | NA  | 0 | 0 Low-quality     | Genome-fragment | 1.65  | 0     |
| 59_k141_102650                               | 3487 No  | NA  | 0 | 1 Not-determined  | Genome-fragment | NA    | 0     |
| 59_k141_33050                                | 4061 No  | NA  | 0 | 1 Not-determined  | Genome-fragment | NA    | 0     |
| 59_k141_113139                               | 5222 No  | NA  | 0 | 4 Not-determined  | Genome-fragment | NA    | 0     |
| 59_k141_27633                                | 1469 No  | NA  | 0 | 1 Not-determined  | Genome-fragment | NA    | 0     |
| 512-final-viral-combined_k141_337974  full   | 1058 No  | NA  | 0 | 0 Low-quality     | Genome-fragment | 2.72  | 0     |
| 59_k141_123793                               | 1026 No  | NA  | 0 | 1 Not-determined  | Genome-fragment | NA    | 0     |
| 59_k141_59838                                | 1160 No  | NA  | 0 | 1 Not-determined  | Genome-fragment | NA    | 0     |
| 59_k141_118887                               | 1578 No  | NA  | 0 | 1 Not-determined  | Genome-fragment | NA    | 0     |
| 59_k141_33128                                | 1205 No  | NA  | 0 | 1 Not-determined  | Genome-fragment | NA    | 0     |
| 59_k141_43041                                | 1018 No  | NA  | 0 | 1 Not-determined  | Genome-fragment | NA    | 0     |
| 59_k141_59921                                | 3731 No  | NA  | 0 | 3 Not-determined  | Genome-fragment | NA    | 0     |
| 59_k141_102682                               | 1105 No  | NA  | 0 | 1 Not-determined  | Genome-fragment | NA    | 0     |
| 59_k141_33164                                | 1509 No  | NA  | 0 | 1 Not-determined  | Genome-fragment | NA    | 0     |
| 512-final-viral-combined_k141_240745  full   | 1058 No  | NA  | 0 | 0 Low-quality     | Genome-fragment | 2.52  | 0     |
| 56-final-viral-combined_k141_117069  full    | 1058 No  | NA  | 0 | 0 Low-quality     | Genome-fragment | 1.98  | 0     |
| 59_k141_6194                                 | 5172 No  | NA  | 0 | 2 Not-determined  | Genome-fragment | NA    | 0     |
| 59_k141_11430                                | 1026 No  | NA  | 0 | 1 Not-determined  | Genome-fragment | NA    | 0     |
| 58-final-viral-combined_k141_237272  H2gene  | 1058 No  | NA  | 0 | 0 Low-quality     | Genome-fragment | 39.56 | 0     |
| 59_k141_107701                               | 3063 No  | NA  | 0 | 1 Not-determined  | Genome-fragment | NA    | 0     |
| 59-final-viral-combined_k141_127677  full    | 1059 No  | NA  | 0 | 0 Low-quality     | Genome-fragment | 2.36  | 0     |
| 59_k141_16756                                | 1246 No  | NA  | 0 | 0 Not-determined  | Genome-fragment | NA    | 0     |
| 59_k141_38310                                | 2758 No  | NA  | 0 | 0 Not-determined  | Genome-fragment | NA    | 0     |
| 59_k141_38323                                | 1320 No  | NA  | 0 | 1 Not-determined  | Genome-fragment | NA    | 0     |
| 59_k141_43638                                | 1385 No  | NA  | 0 | 0 Not-determined  | Genome-fragment | NA    | 0     |
| 59-final-viral-combined_k141_67851  H2gene   | 1845 No  | NA  | 0 | 1 Not-determined  | Genome-fragment | 1.34  | 0     |
| 59_k141_97479                                | 1063 No  | NA  | 0 | 1 Not-determined  | Genome-fragment | NA    | 0     |
| 59_k141_34511                                | 1728 No  | NA  | 0 | 1 Not-determined  | Genome-fragment | NA    | 0     |
| 511-final-viral-combined_k141_240025  full   | 1059 No  | NA  | 0 | 0 Low-quality     | Genome-fragment | 3.31  | 0     |
| 59_k141_1524                                 | 1193 No  | NA  | 0 | 2 Not-determined  | Genome-fragment | NA    | 0     |
| 59_k141_123938                               | 1264 No  | NA  | 0 | 1 Not-determined  | Genome-fragment | NA    | 0     |
| 59_k141_70231                                | 5111 No  | NA  | 0 | 0 Not-determined  | Genome-fragment | NA    | 0     |
| 59_k141_16829                                | 2054 No  | NA  | 0 | 2 Not-determined  | Genome-fragment | NA    | 0     |
| 59_k141_123953                               | 1610 No  | NA  | 0 | 1 Not-determined  | Genome-fragment | NA    | 0     |
| 59_k141_11551                                | 1311 No  | NA  | 0 | 0 Not-determined  | Genome-fragment | NA    | 0     |
| 59_k141_27947                                | 1331 No  | NA  | 0 | 0 Not-determined  | Genome-fragment | NA    | 0     |
| 59_k141_65129                                | 1092 No  | NA  | 0 | 1 Not-determined  | Genome-fragment | NA    | 0     |
| 59_k141_16843                                | 1274 No  | NA  | 0 | 1 Not-determined  | Genome-fragment | NA    | 0     |
| 59_k141_81552                                | 1227 No  | NA  | 0 | 1 Not-determined  | Genome-fragment | NA    | 0     |
| 511-final-viral-combined_k141_321788  full   | 1059 No  | NA  | 0 | 0 Low-quality     | Genome-fragment | 2.05  | 0     |
| 59_k141_86814                                | 3669 No  | NA  | 0 | 5 Not-determined  | Genome-fragment | NA    | 0     |
| 59_k141_118854                               | 1047 No  | NA  | 0 | 1 Not-determined  | Genome-fragment | NA    | 0     |
| 59_k141_113242                               | 3263 No  | NA  | 0 | 2 Not-determined  | Genome-fragment | NA    | 0     |
| 511_k141_181159                              | 1059 No  | NA  | 0 | 0 Low-quality     | Genome-fragment | 0.68  | 0     |
| 511_k141_321180                              | 1059 No  | NA  | 0 | 0 Low-quality     | Genome-fragment | 2.75  | 0     |
| 51-final-viral-combined_k141_150710  full    | 1059 No  | NA  | 0 | 0 Low-quality     | Genome-fragment | 0.86  | 0     |
| 59_k141_113259                               | 3241 No  | NA  | 0 | 2 Not-determined  | Genome-fragment | NA    | 0     |
| 59_k141_81627                                | 2208 No  | NA  | 0 | 1 Not-determined  | Genome-fragment | NA    | 0     |
| 59_k141_54668                                | 1029 No  | NA  | 0 | 1 Not-determined  | Genome-fragment | NA    | 0     |
| 59_k141_43722                                | 1060 No  | NA  |   |                   |                 |       |       |



|                                              |       |    |    |   |    |                |                 |    |      |
|----------------------------------------------|-------|----|----|---|----|----------------|-----------------|----|------|
| 59_k141_1736                                 | 1085  | No | NA | 0 | 1  | Not-determined | Genome-fragment | NA | 0    |
| 59_k141_1739                                 | 1336  | No | NA | 0 | 0  | Not-determined | Genome-fragment | NA | 0    |
| 59_k141_70472                                | 3335  | No | NA | 0 | 0  | Not-determined | Genome-fragment | NA | 0    |
| 59_k141_22640                                | 1045  | No | NA | 0 | 0  | Not-determined | Genome-fragment | NA | 0    |
| 55-final-viral-combined_k141_31776  full     | 1059  | No | NA | 1 | 0  | Low-quality    | Genome-fragment | NA | 2.2  |
| 59_k141_92124                                | 1041  | No | NA | 0 | 1  | Not-determined | Genome-fragment | NA | 0    |
| 59_k141_86857                                | 1307  | No | NA | 0 | 0  | Not-determined | Genome-fragment | NA | 0    |
| 57_k141_218025                               | 1059  | No | NA | 0 | 0  | Low-quality    | Genome-fragment | NA | 1    |
| 517-final-viral-combined_k141_196696  full   | 1059  | No | NA | 1 | 0  | Low-quality    | Genome-fragment | NA | 2.8  |
| 59_k141_28051                                | 1605  | No | NA | 0 | 1  | Not-determined | Genome-fragment | NA | 0    |
| 512-final-viral-combined_k141_43924  full    | 1059  | No | NA | 1 | 0  | Low-quality    | Genome-fragment | NA | 0.64 |
| 512_k141_125950                              | 1059  | No | NA | 0 | 0  | Low-quality    | Genome-fragment | NA | 0.47 |
| 54_k141_150536                               | 1059  | No | NA | 0 | 2  | Low-quality    | Genome-fragment | NA | 0.55 |
| 59_k141_65420                                | 1384  | No | NA | 0 | 0  | Not-determined | Genome-fragment | NA | 0    |
| 59_k141_86878                                | 28068 | No | NA | 0 | 0  | Not-determined | Genome-fragment | NA | 0    |
| 59_k141_131498                               | 1854  | No | NA | 0 | 1  | Not-determined | Genome-fragment | NA | 0    |
| 511-final-viral-combined_k141_99537  full    | 1060  | No | NA | 1 | 0  | Low-quality    | Genome-fragment | NA | 1.4  |
| 59_k141_70589                                | 1121  | No | NA | 0 | 1  | Not-determined | Genome-fragment | NA | 0    |
| 52_k141_16513                                | 1060  | No | NA | 0 | 1  | Low-quality    | Genome-fragment | NA | 0.26 |
| 59_k141_70594                                | 1177  | No | NA | 0 | 1  | Not-determined | Genome-fragment | NA | 0    |
| 59_k141_81797                                | 1003  | No | NA | 0 | 1  | Not-determined | Genome-fragment | NA | 0    |
| 59_k141_54891                                | 2082  | No | NA | 0 | 0  | Not-determined | Genome-fragment | NA | 0    |
| 59_k141_103009                               | 1031  | No | NA | 0 | 0  | Not-determined | Genome-fragment | NA | 0    |
| 59_k141_38535                                | 3310  | No | NA | 0 | 1  | Not-determined | Genome-fragment | NA | 0    |
| 55-final-viral-combined_k141_171858  full    | 1060  | No | NA | 0 | 0  | Low-quality    | Genome-fragment | NA | 2.09 |
| 59_k141_54925                                | 1365  | No | NA | 0 | 1  | Not-determined | Genome-fragment | NA | 0    |
| 55-final-viral-combined_k141_162102  H2gene  | 1060  | No | NA | 1 | 0  | Low-quality    | Genome-fragment | NA | 2.28 |
| 59_k141_113532                               | 3423  | No | NA | 0 | 2  | Not-determined | Genome-fragment | NA | 0    |
| 59_k141_6819                                 | 1252  | No | NA | 0 | 1  | Not-determined | Genome-fragment | NA | 0    |
| 59_k141_22868                                | 3916  | No | NA | 0 | 1  | Not-determined | Genome-fragment | NA | 0    |
| 59_k141_70683                                | 5586  | No | NA | 0 | 0  | Not-determined | Genome-fragment | NA | 0    |
| 59_k141_81841                                | 4518  | No | NA | 0 | 1  | Not-determined | Genome-fragment | NA | 0    |
| 59_k141_70750                                | 2664  | No | NA | 0 | 2  | Not-determined | Genome-fragment | NA | 0    |
| 59_k141_28235                                | 2403  | No | NA | 0 | 0  | Not-determined | Genome-fragment | NA | 0    |
| 59_k141_28236                                | 1096  | No | NA | 0 | 1  | Not-determined | Genome-fragment | NA | 0    |
| 59_k141_38578                                | 2213  | No | NA | 0 | 0  | Not-determined | Genome-fragment | NA | 0    |
| 59_k141_55012                                | 1316  | No | NA | 0 | 0  | Not-determined | Genome-fragment | NA | 0    |
| 57-final-viral-combined_k141_146205  full    | 1060  | No | NA | 1 | 0  | Low-quality    | Genome-fragment | NA | 2.29 |
| 517-final-viral-combined_k141_21063  full    | 1060  | No | NA | 0 | 1  | Low-quality    | Genome-fragment | NA | 0.54 |
| 59_k141_6983                                 | 1004  | No | NA | 0 | 0  | Not-determined | Genome-fragment | NA | 0    |
| 59_k141_28275                                | 1368  | No | NA | 0 | 0  | Not-determined | Genome-fragment | NA | 0    |
| 59_k141_38657                                | 1212  | No | NA | 0 | 1  | Not-determined | Genome-fragment | NA | 0    |
| 59_k141_81948                                | 1184  | No | NA | 0 | 1  | Not-determined | Genome-fragment | NA | 0    |
| 59_k141_124410                               | 3270  | No | NA | 0 | 3  | Not-determined | Genome-fragment | NA | 0    |
| 59_k141_70808                                | 6028  | No | NA | 0 | 5  | Not-determined | Genome-fragment | NA | 0    |
| 59_k141_17342                                | 1023  | No | NA | 0 | 1  | Not-determined | Genome-fragment | NA | 0    |
| 59_k141_49731                                | 3475  | No | NA | 0 | 2  | Not-determined | Genome-fragment | NA | 0    |
| 59_k141_108215                               | 1262  | No | NA | 0 | 1  | Not-determined | Genome-fragment | NA | 0    |
| 59_k141_103303                               | 1014  | No | NA | 0 | 1  | Not-determined | Genome-fragment | NA | 0    |
| 59_k141_44188                                | 2099  | No | NA | 0 | 1  | Not-determined | Genome-fragment | NA | 0    |
| 59_k141_44189                                | 1012  | No | NA | 0 | 1  | Not-determined | Genome-fragment | NA | 0    |
| 59_k141_97816                                | 23242 | No | NA | 0 | 5  | Not-determined | Genome-fragment | NA | 0    |
| 59_k141_33372                                | 1507  | No | NA | 0 | 1  | Not-determined | Genome-fragment | NA | 0    |
| 59_k141_119113                               | 1244  | No | NA | 0 | 1  | Not-determined | Genome-fragment | NA | 0    |
| 59_k141_75989                                | 1117  | No | NA | 0 | 0  | Not-determined | Genome-fragment | NA | 0    |
| 59_k141_65768                                | 1550  | No | NA | 0 | 0  | Not-determined | Genome-fragment | NA | 0    |
| 59_k141_75990                                | 6391  | No | NA | 0 | 3  | Not-determined | Genome-fragment | NA | 0    |
| 59_k141_87187                                | 25238 | No | NA | 0 | 31 | Not-determined | Genome-fragment | NA | 0    |
| 512_k141_36777                               | 1060  | No | NA | 0 | 1  | Low-quality    | Genome-fragment | NA | 2.99 |
| 59_k141_33392                                | 8414  | No | NA | 0 | 8  | Not-determined | Genome-fragment | NA | 0    |
| 59_k141_70929                                | 1877  | No | NA | 0 | 2  | Not-determined | Genome-fragment | NA | 0    |
| 59_k141_17501                                | 1763  | No | NA | 0 | 0  | Not-determined | Genome-fragment | NA | 0    |
| 59_k141_60586                                | 1308  | No | NA | 0 | 1  | Not-determined | Genome-fragment | NA | 0    |
| 59_k141_55198                                | 6796  | No | NA | 0 | 1  | Not-determined | Genome-fragment | NA | 0    |
| 59_k141_124517                               | 2220  | No | NA | 0 | 0  | Not-determined | Genome-fragment | NA | 0    |
| 59_k141_33397                                | 1458  | No | NA | 0 | 0  | Not-determined | Genome-fragment | NA | 0    |
| 512_k141_93685                               | 1060  | No | NA | 0 | 0  | Low-quality    | Genome-fragment | NA | 0.57 |
| 52-final-viral-combined_k141_85104  full     | 1060  | No | NA | 0 | 0  | Low-quality    | Genome-fragment | NA | 1.52 |
| 59_k141_2097                                 | 1565  | No | NA | 0 | 0  | Not-determined | Genome-fragment | NA | 0    |
| 52_k141_11508                                | 1060  | No | NA | 0 | 0  | Low-quality    | Genome-fragment | NA | 2.73 |
| 59_k141_49893                                | 9651  | No | NA | 0 | 0  | Not-determined | Genome-fragment | NA | 0    |
| 59_k141_2112                                 | 2358  | No | NA | 0 | 2  | Not-determined | Genome-fragment | NA | 0    |
| 52_k141_16178                                | 1060  | No | NA | 0 | 0  | Low-quality    | Genome-fragment | NA | 2.2  |
| 59_k141_33426                                | 9829  | No | NA | 0 | 2  | Not-determined | Genome-fragment | NA | 0    |
| 59_k141_44200                                | 3468  | No | NA | 0 | 1  | Not-determined | Genome-fragment | NA | 0    |
| 59_k141_33437                                | 5306  | No | NA | 0 | 2  | Not-determined | Genome-fragment | NA | 0    |
| 59_k141_92533                                | 1627  | No | NA | 0 | 1  | Not-determined | Genome-fragment | NA | 0    |
| 52_k141_6263                                 | 1060  | No | NA | 0 | 1  | Low-quality    | Genome-fragment | NA | 0.37 |
| 54-final-viral-combined_k141_22818  full     | 1060  | No | NA | 0 | 1  | Low-quality    | Genome-fragment | NA | 1.55 |
| 59_k141_23223                                | 3014  | No | NA | 0 | 1  | Not-determined | Genome-fragment | NA | 0    |
| 59_k141_55340                                | 1519  | No | NA | 0 | 0  | Not-determined | Genome-fragment | NA | 0    |
| 59_k141_92567                                | 1123  | No | NA | 0 | 0  | Not-determined | Genome-fragment | NA | 0    |
| 59_k141_66026                                | 4639  | No | NA | 0 | 3  | Not-determined | Genome-fragment | NA | 0    |
| 59_k141_108358                               | 1454  | No | NA | 0 | 0  | Not-determined | Genome-fragment | NA | 0    |
| 59_k141_76180                                | 1109  | No | NA | 0 | 0  | Not-determined | Genome-fragment | NA | 0    |
| 54-final-viral-combined_k141_90288  H2gene   | 1060  | No | NA | 1 | 0  | Low-quality    | Genome-fragment | NA | 1.72 |
| 54_k141_156157                               | 1060  | No | NA | 0 | 0  | Low-quality    | Genome-fragment | NA | 1.05 |
| 59_k141_12052                                | 1238  | No | NA | 0 | 1  | Not-determined | Genome-fragment | NA | 0    |
| 59_k141_60730                                | 2210  | No | NA | 0 | 0  | Not-determined | Genome-fragment | NA | 0    |
| 59-final-viral-combined_k141_67536  H2gene   | 1061  | No | NA | 1 | 0  | Low-quality    | Genome-fragment | NA | 1.57 |
| 59_k141_87287                                | 1097  | No | NA | 0 | 1  | Not-determined | Genome-fragment | NA | 0    |
| 59_k141_55446                                | 2161  | No | NA | 0 | 1  | Not-determined | Genome-fragment | NA | 0    |
| 511-final-viral-combined_k141_170906  full   | 1061  | No | NA | 0 | 0  | Low-quality    | Genome-fragment | NA | 2.05 |
| 59_k141_23306                                | 2070  | No | NA | 0 | 1  | Not-determined | Genome-fragment | NA | 0    |
| 59_k141_119339                               | 6441  | No | NA | 0 | 1  | Not-determined | Genome-fragment | NA | 0    |
| 511_k141_138123                              | 1061  | No | NA | 0 | 0  | Low-quality    | Genome-fragment | NA | 0.8  |
| 59_k141_50122                                | 1281  | No | NA | 0 | 1  | Not-determined | Genome-fragment | NA | 0    |
| 511_k141_304463                              | 1061  | No | NA | 0 | 1  | Low-quality    | Genome-fragment | NA | 0.37 |
| 51-final-viral-combined_k141_229995  full    | 1061  | No | NA | 0 | 0  | Low-quality    | Genome-fragment | NA | 1.6  |
| 55_k141_42642                                | 1061  | No | NA | 0 | 1  | Low-quality    | Genome-fragment | NA | 0.57 |
| 59_k141_28449                                | 1722  | No | NA | 0 | 1  | Not-determined | Genome-fragment | NA | 0    |
| 59_k141_23156                                | 1218  | No | NA | 0 | 1  | Not-determined | Genome-fragment | NA | 0    |
| 59_k141_28454                                | 1642  | No | NA | 0 | 2  | Not-determined | Genome-fragment | NA | 0    |
| 517-final-viral-combined_k141_182615  full   | 1061  | No | NA | 1 | 0  | Low-quality    | Genome-fragment | NA | 2.69 |
| 59_k141_12211                                | 1252  | No | NA | 0 | 2  | Not-determined | Genome-fragment | NA | 0    |
| 517-final-viral-combined_k141_141281  full   | 1061  | No | NA | 0 | 0  | Low-quality    | Genome-fragment | NA | 0.58 |
| 512-final-viral-combined_k141_173536  H2gene | 1061  | No | NA | 2 | 0  | Low-quality    | Genome-fragment | NA | 2.63 |
| 52-final-viral-combined_k141_152804  full    | 1061  | No | NA | 0 | 0  | Low-quality    | Genome-fragment | NA | 2.54 |
| 52-final-viral-combined_k141_71570  full     | 1061  | No | NA | 0 | 0  | Low-quality    | Genome-fragment | NA | 2.28 |
| 59_k141_28581                                | 1403  | No | NA | 0 | 0  | Not-determined | Genome-fragment | NA | 0    |
| 59_k141_33527                                | 1190  | No | NA | 0 | 1  | Not-determined | Genome-fragment | NA | 0    |
| 52_k141_151235                               | 1061  | No | NA | 0 | 0  | Low-quality    | Genome-fragment | NA | 1.96 |
| 59_k141_71225                                | 5795  | No | NA | 0 | 1  | Not-determined | Genome-fragment | NA | 0    |
| 54-final-viral-combined_k141_165568  full    | 1061  | No | NA | 0 | 0  | Low-quality    | Genome-fragment | NA | 1.73 |
| 59_k141_7489                                 | 1342  | No | NA | 0 | 0  | Not-determined | Genome-fragment | NA | 0    |
| 54-final-viral-combined_k141_153421  H2gene  | 1061  | No | NA | 1 | 0  | Low-quality    | Genome-fragment | NA | 2.54 |
| 59_k141_60965                                | 1507  | No | NA | 0 | 0  | Not-determined | Genome-fragment | NA | 0    |
| 59_k141_60281                                | 1274  | No | NA | 0 | 0  | Not-determined | Genome-fragment | NA | 0    |
| 59_k141_12372                                | 1234  | No | NA | 0 | 0  | Not-determined | Genome-fragment | NA | 0    |
| 59_k141_2448                                 | 1359  | No | NA | 0 | 0  | Not-determined | Genome-fragment | NA | 0    |
| 59_k141_17925                                | 1426  | No | NA | 0 | 1  | Not-determined | Genome-fragment | NA | 0    |
| 56-final-viral-combined_k141_49802  full     | 1061  | No | NA | 0 | 1  | Low-quality    | Genome-fragment | NA | 2.29 |
| 59_k141_39264                                | 1526  | No | NA | 0 | 2  | Not-determined | Genome-fragment | NA | 0    |
| 59_k141_110912                               | 6014  | No | NA | 0 | 1  | Not-determined | Genome-fragment | NA | 0    |
| 59_k141_92813                                | 4464  | No | NA | 0 | 1  | Not-determined | Genome-fragment | NA | 3.21 |
| 59_k141_12445                                | 1652  | No | NA | 0 | 0  | Not-determined | Genome-fragment | NA | 0    |
| 59_k141_66317                                | 1309  | No | NA | 0 | 1  | Not-determined | Genome-fragment | NA | 0    |
| 59_k141_61053                                | 1475  | No | NA | 0 | 1  | Not-determined | Genome-fragment | NA | 0    |
| 59-final-viral-combined_k141_90970  full     | 1062  | No | NA | 0 | 0  | Low-quality    | Genome-fragment | NA | 2.64 |
| 59_k141_12462                                | 4158  | No | NA | 0 | 3  | Not-determined | Genome-fragment | NA | 0    |
| 59_k141_119581                               | 1793  | No | NA | 0 | 0  | Not-determined | Genome-fragment | NA | 0    |
| 51-final-viral-combined_k141_120326  full    | 1062  | No | NA | 0 | 0  | Low-quality    | Genome-fragment | NA | 0.81 |
| 59_k141_98240                                | 3086  | No | NA | 0 | 0  | Not-determined | Genome-fragment | NA | 0    |
| 51-final-viral-combined_k141_96959  full     | 1062  | No | NA | 0 | 0  | Low-quality    | Genome-fragment | NA | 1.82 |
| 59_k141_76397                                | 1702  | No | NA | 0 | 2  | Not-determined | Genome-fragment | NA | 0    |
| 51-final-viral-combined_k141_179759  full    | 1062  | No | NA | 0 | 0  | Low-quality    | Genome-fragment | NA | 3.44 |
| 59_k141_76419                                | 6893  | No | NA | 0 | 2  | Not-determined | Genome-fragment | NA | 0    |
| 59_k141_50434                                | 1127  | No | NA | 0 | 1  | Not-determined | Genome-fragment | NA | 0    |
| 53-final-viral-combined_k141_127141  full    | 1062  | No | NA | 0 | 0  | Low-quality    | Genome-fragment | NA | 0.63 |
| 59_k141_18090                                | 4913  | No | NA | 0 | 1  | Not-determined | Genome-fragment | NA | 0    |
| 59_k141_82487                                | 1602  | No | NA | 0 | 0  | Not-determined | Genome-fragment | NA | 0    |
| 53-final-viral-combined_k141_4667  full      | 1062  | No | NA | 0 | 0  | Low-quality    | Genome-fragment | NA | 1.92 |
| 57-final-viral-combined_k141_211396  H2gene  | 1062  | No | NA | 2 | 0  | Low-quality    | Genome-fragment | NA | 1.51 |
| 59_k141_61124                                | 1359  | No | NA | 0 | 2  | Not-determined | Genome-fragment | NA | 0    |
| 57-final-viral-combined_k141_7465  H2gene    | 1062  |    |    |   |    |                |                 |    |      |



|                                              |       |    |    |   |    |                |                 |    |       |
|----------------------------------------------|-------|----|----|---|----|----------------|-----------------|----|-------|
| 59_k141_108773                               | 1038  | No | NA | 0 | 1  | Not-determined | Genome-fragment | NA | 0     |
| 59_k141_45441                                | 1094  | No | NA | 0 | 0  | Not-determined | Genome-fragment | NA | 0     |
| 59_k141_108787                               | 1114  | No | NA | 0 | 0  | Not-determined | Genome-fragment | NA | 0     |
| 59_k141_61303                                | 1064  | No | NA | 0 | 1  | Not-determined | Genome-fragment | NA | 0     |
| 59_k141_12839                                | 1446  | No | NA | 0 | 1  | Not-determined | Genome-fragment | NA | 0     |
| 59_k141_108798                               | 5124  | No | NA | 0 | 0  | Not-determined | Genome-fragment | NA | 0     |
| 59_k141_124914                               | 1182  | No | NA | 0 | 1  | Not-determined | Genome-fragment | NA | 0     |
| 59_k141_98264                                | 9643  | No | NA | 0 | 1  | Not-determined | Genome-fragment | NA | 0     |
| 59_k141_82766                                | 3429  | No | NA | 0 | 3  | Not-determined | Genome-fragment | NA | 0     |
| 512_k141_33022                               | 1062  | No | NA | 1 | 0  | Low-quality    | Genome-fragment | NA | 2.93  |
| 59_k141_98279                                | 1997  | No | NA | 0 | 1  | Not-determined | Genome-fragment | NA | 0     |
| 54-final-viral-combined_k141_128781  H2gene  | 1062  | No | NA | 1 | 0  | Low-quality    | Genome-fragment | NA | 0.69  |
| 59_k141_2748                                 | 3030  | No | NA | 0 | 1  | Not-determined | Genome-fragment | NA | 0     |
| 59_k141_82844                                | 1005  | No | NA | 0 | 0  | Not-determined | Genome-fragment | NA | 0     |
| 59_k141_2754                                 | 2974  | No | NA | 0 | 2  | Not-determined | Genome-fragment | NA | 0     |
| 58-final-viral-combined_k141_32038  full     | 1062  | No | NA | 0 | 0  | Low-quality    | Genome-fragment | NA | 1.76  |
| 59_k141_93069                                | 3343  | No | NA | 0 | 2  | Not-determined | Genome-fragment | NA | 0     |
| 59_k141_7913                                 | 1643  | No | NA | 0 | 1  | Not-determined | Genome-fragment | NA | 0     |
| 59_k141_102982                               | 1214  | No | NA | 0 | 0  | Not-determined | Genome-fragment | NA | 0     |
| 59_k141_2790                                 | 1210  | No | NA | 0 | 1  | Not-determined | Genome-fragment | NA | 0     |
| 59-final-viral-combined_k141_48284  full     | 1063  | No | NA | 1 | 0  | Low-quality    | Genome-fragment | NA | 1.91  |
| 511-final-viral-combined_k141_162437  full   | 1063  | No | NA | 1 | 0  | Low-quality    | Genome-fragment | NA | 2.18  |
| 59_k141_82893                                | 3598  | No | NA | 0 | 4  | Not-determined | Genome-fragment | NA | 0     |
| 511-final-viral-combined_k141_314483  full   | 1063  | No | NA | 0 | 1  | Low-quality    | Genome-fragment | NA | 0.73  |
| 517-final-viral-combined_k141_256032  full   | 1063  | No | NA | 2 | 0  | Low-quality    | Genome-fragment | NA | 2.33  |
| 59_k141_93095                                | 1130  | No | NA | 0 | 3  | Not-determined | Genome-fragment | NA | 0     |
| 59_k141_87967                                | 1378  | No | NA | 0 | 1  | Not-determined | Genome-fragment | NA | 0     |
| 59_k141_114036                               | 2305  | No | NA | 0 | 0  | Not-determined | Genome-fragment | NA | 0     |
| 517-final-viral-combined_k141_181839  full   | 1063  | No | NA | 2 | 1  | Low-quality    | Genome-fragment | NA | 2.46  |
| 59_k141_23694                                | 1062  | No | NA | 0 | 2  | Not-determined | Genome-fragment | NA | 0     |
| 59_k141_83003                                | 1130  | No | NA | 0 | 0  | Not-determined | Genome-fragment | NA | 0     |
| 59_k141_50811                                | 1471  | No | NA | 0 | 1  | Not-determined | Genome-fragment | NA | 0     |
| 59_k141_55972                                | 1862  | No | NA | 0 | 1  | Not-determined | Genome-fragment | NA | 0     |
| 59_k141_66557                                | 4224  | No | NA | 0 | 0  | Not-determined | Genome-fragment | NA | 0     |
| 59_k141_50826                                | 4480  | No | NA | 0 | 3  | Not-determined | Genome-fragment | NA | 0     |
| 517-k141_186583                              | 1063  | No | NA | 0 | 1  | Low-quality    | Genome-fragment | NA | 2.12  |
| 59_k141_33954                                | 2554  | No | NA | 0 | 1  | Not-determined | Genome-fragment | NA | 0     |
| 59_k141_83062                                | 2004  | No | NA | 0 | 1  | Not-determined | Genome-fragment | NA | 0     |
| 59_k141_61332                                | 3472  | No | NA | 0 | 2  | Not-determined | Genome-fragment | NA | 0     |
| 59_k141_50839                                | 1036  | No | NA | 0 | 0  | Not-determined | Genome-fragment | NA | 0     |
| 59_k141_104090                               | 1106  | No | NA | 0 | 1  | Not-determined | Genome-fragment | NA | 0     |
| 59_k141_2862                                 | 2386  | No | NA | 0 | 3  | Not-determined | Genome-fragment | NA | 0     |
| 59_k141_88115                                | 1049  | No | NA | 0 | 0  | Not-determined | Genome-fragment | NA | 0     |
| 59_k141_76822                                | 1405  | No | NA | 0 | 0  | Not-determined | Genome-fragment | NA | 0     |
| 59_k141_98391                                | 3054  | No | NA | 0 | 3  | Not-determined | Genome-fragment | NA | 0     |
| 512-final-viral-combined_k141_24813  full    | 1063  | No | NA | 0 | 1  | Low-quality    | Genome-fragment | NA | 1.82  |
| 59_k141_93181                                | 1145  | No | NA | 0 | 0  | Not-determined | Genome-fragment | NA | 0     |
| 59_k141_104169                               | 4074  | No | NA | 0 | 0  | Medium-quality | Genome-fragment | NA | 69.89 |
| 59_k141_104188                               | 3112  | No | NA | 0 | 0  | Not-determined | Genome-fragment | NA | 0     |
| 512_k141_211540                              | 1063  | No | NA | 0 | 0  | Low-quality    | Genome-fragment | NA | 0.71  |
| 59_k141_39771                                | 1355  | No | NA | 0 | 1  | Not-determined | Genome-fragment | NA | 0     |
| 59_k141_29045                                | 9750  | No | NA | 0 | 17 | Not-determined | Genome-fragment | NA | 0     |
| 59_k141_12895                                | 18327 | No | NA | 0 | 4  | Not-determined | Genome-fragment | NA | 0     |
| 512_k141_348550                              | 1063  | No | NA | 0 | 0  | Low-quality    | Genome-fragment | NA | 1.88  |
| 59_k141_29185                                | 1218  | No | NA | 0 | 0  | Not-determined | Genome-fragment | NA | 0     |
| 59_k141_56161                                | 4176  | No | NA | 0 | 2  | Not-determined | Genome-fragment | NA | 0     |
| 59_k141_39790                                | 1207  | No | NA | 0 | 1  | Not-determined | Genome-fragment | NA | 0     |
| 59_k141_56162                                | 2275  | No | NA | 0 | 1  | Not-determined | Genome-fragment | NA | 0     |
| 59_k141_12027                                | 1263  | No | NA | 0 | 0  | Not-determined | Genome-fragment | NA | 0     |
| 52-final-viral-combined_k141_180558  full    | 1063  | No | NA | 0 | 1  | Low-quality    | Genome-fragment | NA | 1.56  |
| 59_k141_113951                               | 1000  | No | NA | 0 | 0  | Not-determined | Genome-fragment | NA | 2.54  |
| 52-final-viral-combined_k141_313353  full    | 1063  | No | NA | 0 | 1  | Low-quality    | Genome-fragment | NA | 1.11  |
| 52_k141_126931                               | 1063  | No | NA | 0 | 0  | Low-quality    | Genome-fragment | NA | 0     |
| 59_k141_98412                                | 1396  | No | NA | 0 | 1  | Not-determined | Genome-fragment | NA | 2.71  |
| 54-final-viral-combined_k141_40094  full     | 1063  | No | NA | 0 | 0  | Not-determined | Genome-fragment | NA | 0     |
| 59_k141_8159                                 | 3319  | No | NA | 0 | 0  | Not-determined | Genome-fragment | NA | 0     |
| 58_k141_6037                                 | 1063  | No | NA | 1 | 0  | Low-quality    | Genome-fragment | NA | 2.42  |
| 59_k141_71790                                | 3250  | No | NA | 0 | 1  | Not-determined | Genome-fragment | NA | 0     |
| 511-final-viral-combined_k141_264272  H2gene | 1064  | No | NA | 1 | 0  | Low-quality    | Genome-fragment | NA | 2.62  |
| 59_k141_3045                                 | 2063  | No | NA | 0 | 2  | Not-determined | Genome-fragment | NA | 0     |
| 59_k141_13047                                | 6352  | No | NA | 0 | 1  | Not-determined | Genome-fragment | NA | 0     |
| 59_k141_76995                                | 2378  | No | NA | 0 | 0  | Not-determined | Genome-fragment | NA | 0     |
| 51-final-viral-combined_k141_313304  full    | 1064  | No | NA | 1 | 0  | Low-quality    | Genome-fragment | NA | 1.9   |
| 59_k141_66684                                | 1375  | No | NA | 0 | 0  | Not-determined | Genome-fragment | NA | 0     |
| 59_k141_61598                                | 1141  | No | NA | 0 | 0  | Not-determined | Genome-fragment | NA | 0     |
| 59_k141_8258                                 | 1117  | No | NA | 0 | 1  | Not-determined | Genome-fragment | NA | 0     |
| 59_k141_50936                                | 1089  | No | NA | 0 | 1  | Not-determined | Genome-fragment | NA | 0     |
| 59_k141_114339                               | 1574  | No | NA | 0 | 1  | Not-determined | Genome-fragment | NA | 0     |
| 59_k141_50939                                | 1108  | No | NA | 0 | 1  | Not-determined | Genome-fragment | NA | 0     |
| 59_k141_39845                                | 1048  | No | NA | 0 | 0  | Not-determined | Genome-fragment | NA | 0     |
| 51-final-viral-combined_k141_210059  full    | 1064  | No | NA | 1 | 0  | Low-quality    | Genome-fragment | NA | 2.32  |
| 59_k141_23972                                | 1432  | No | NA | 0 | 1  | Not-determined | Genome-fragment | NA | 0     |
| 59_k141_93348                                | 1409  | No | NA | 0 | 0  | Not-determined | Genome-fragment | NA | 0     |
| 59_k141_3089                                 | 1134  | No | NA | 0 | 1  | Not-determined | Genome-fragment | NA | 0     |
| 59_k141_24191                                | 1154  | No | NA | 0 | 0  | Not-determined | Genome-fragment | NA | 0     |
| 59_k141_56250                                | 3112  | No | NA | 0 | 2  | Not-determined | Genome-fragment | NA | 0     |
| 59_k141_18785                                | 1057  | No | NA | 0 | 1  | Not-determined | Genome-fragment | NA | 0     |
| 51-final-viral-combined_k141_300325  H2gene  | 1064  | No | NA | 1 | 0  | Low-quality    | Genome-fragment | NA | 2.05  |
| 59_k141_83401                                | 1205  | No | NA | 0 | 1  | Not-determined | Genome-fragment | NA | 0     |
| 59_k141_8287                                 | 1213  | No | NA | 0 | 0  | Not-determined | Genome-fragment | NA | 0     |
| 59_k141_120036                               | 1345  | No | NA | 0 | 2  | Not-determined | Genome-fragment | NA | 0     |
| 59_k141_98502                                | 1687  | No | NA | 0 | 0  | Not-determined | Genome-fragment | NA | 0     |
| 59_k141_77109                                | 1283  | No | NA | 0 | 0  | Not-determined | Genome-fragment | NA | 0     |
| 59_k141_114421                               | 1045  | No | NA | 0 | 1  | Not-determined | Genome-fragment | NA | 0     |
| 59_k141_8313                                 | 1179  | No | NA | 0 | 0  | Not-determined | Genome-fragment | NA | 0     |
| 59_k141_18802                                | 1867  | No | NA | 0 | 0  | Not-determined | Genome-fragment | NA | 0     |
| 59_k141_125240                               | 1094  | No | NA | 0 | 0  | Not-determined | Genome-fragment | NA | 0     |
| 59_k141_120085                               | 1118  | No | NA | 0 | 1  | Not-determined | Genome-fragment | NA | 0     |
| 59_k141_29161                                | 4733  | No | NA | 0 | 2  | Not-determined | Genome-fragment | NA | 0     |
| 59_k141_8337                                 | 2978  | No | NA | 0 | 3  | Not-determined | Genome-fragment | NA | 0     |
| 59_k141_120117                               | 1382  | No | NA | 0 | 0  | Not-determined | Genome-fragment | NA | 0     |
| 59_k141_120142                               | 1312  | No | NA | 0 | 1  | Not-determined | Genome-fragment | NA | 0     |
| 59_k141_18844                                | 5638  | No | NA | 0 | 2  | Not-determined | Genome-fragment | NA | 0     |
| 59_k141_24126                                | 6203  | No | NA | 0 | 1  | Not-determined | Genome-fragment | NA | 0     |
| 59_k141_13215                                | 5801  | No | NA | 0 | 2  | Not-determined | Genome-fragment | NA | 0     |
| 51_k141_376641                               | 1064  | No | NA | 0 | 0  | Low-quality    | Genome-fragment | NA | 2.23  |
| 59_k141_77185                                | 1007  | No | NA | 0 | 1  | Not-determined | Genome-fragment | NA | 0     |
| 59_k141_13266                                | 2229  | No | NA | 0 | 1  | Not-determined | Genome-fragment | NA | 0     |
| 59_k141_18916                                | 1636  | No | NA | 0 | 0  | Not-determined | Genome-fragment | NA | 0     |
| 59_k141_45093                                | 1068  | No | NA | 0 | 0  | Not-determined | Genome-fragment | NA | 0     |
| 59_k141_29245                                | 2208  | No | NA | 0 | 1  | Not-determined | Genome-fragment | NA | 0     |
| 59_k141_13397                                | 1244  | No | NA | 0 | 0  | Not-determined | Genome-fragment | NA | 0     |
| 59_k141_39962                                | 1976  | No | NA | 0 | 1  | Not-determined | Genome-fragment | NA | 0     |
| 55-final-viral-combined_k141_116021  full    | 1064  | No | NA | 1 | 0  | Low-quality    | Genome-fragment | NA | 1.97  |
| 59_k141_51090                                | 2970  | No | NA | 0 | 1  | Not-determined | Genome-fragment | NA | 0     |
| 59_k141_61735                                | 1532  | No | NA | 0 | 0  | Not-determined | Genome-fragment | NA | 0     |
| 55_k141_1696                                 | 1064  | No | NA | 0 | 1  | Low-quality    | Genome-fragment | NA | 0.4   |
| 59_k141_120262                               | 1217  | No | NA | 0 | 0  | Not-determined | Genome-fragment | NA | 0     |
| 59_k141_125363                               | 2091  | No | NA | 0 | 4  | Not-determined | Genome-fragment | NA | 0     |
| 59_k141_24232                                | 3251  | No | NA | 0 | 7  | Not-determined | Genome-fragment | NA | 0     |
| 59_k141_120272                               | 11828 | No | NA | 0 | 9  | Not-determined | Genome-fragment | NA | 0     |
| 59_k141_120278                               | 1802  | No | NA | 0 | 3  | Not-determined | Genome-fragment | NA | 0     |
| 59_k141_40039                                | 2964  | No | NA | 0 | 0  | Not-determined | Genome-fragment | NA | 0     |
| 59_k141_45253                                | 1487  | No | NA | 0 | 0  | Not-determined | Genome-fragment | NA | 0     |
| 59_k141_13279                                | 12264 | No | NA | 0 | 1  | Not-determined | Genome-fragment | NA | 0     |
| 59_k141_19025                                | 55093 | No | NA | 9 | 0  | High-quality   | High-quality    | NA | 90.22 |
| 59_k141_24282                                | 6325  | No | NA | 0 | 0  | Not-determined | Genome-fragment | NA | 0     |
| 57-final-viral-combined_k141_53652  full     | 1064  | No | NA | 1 | 0  | Low-quality    | Genome-fragment | NA | 2.09  |
| 59_k141_120313                               | 1056  | No | NA | 0 | 0  | Not-determined | Genome-fragment | NA | 0     |
| 512-final-viral-combined_k141_17272  full    | 1064  | No | NA | 1 | 0  | Low-quality    | Genome-fragment | NA | 1.41  |
| 59_k141_120333                               | 1124  | No | NA | 0 | 2  | Not-determined | Genome-fragment | NA | 0.31  |
| 512-final-viral-combined_k141_17691  full    | 1064  | No | NA | 0 | 2  | Low-quality    | Genome-fragment | NA | 0     |
| 59_k141_125422                               | 31732 | No | NA | 0 | 18 | Not-determined | Genome-fragment | NA | 0     |
| 59_k141_72086                                | 1219  | No | NA | 0 | 1  | Not-determined | Genome-fragment | NA | 0     |
| 512_k141_144277                              | 1064  | No | NA | 0 | 0  | Low-quality    | Genome-fragment | NA | 0.56  |
| 59_k141_45348                                | 3273  | No | NA | 0 | 1  | Not-determined | Genome-fragment | NA | 0     |
| 52-final-viral-combined_k141_129330  full    | 1064  | No | NA | 0 | 0  | Low-quality    | Genome-fragment | NA | 2.43  |
| 59_k141_120427                               | 1373  | No | NA | 0 | 1  | Not-determined | Genome-fragment | NA | 0     |
| 59_k141_93563                                | 3155  | No | NA | 0 | 1  | Not-determined | Genome-fragment | NA | 0     |
| 54-final-viral-combined_k141_117952  full    | 1064  | No | NA | 1 | 0  | Low-quality    | Genome-fragment | NA | 1.61  |
| 59_k141_24348                                | 6316  | No | NA | 0 | 2  | Not-determined | Genome-fragment | NA | 0     |
| 56_k141_24663                                | 1064  | No | NA | 0 | 0  | Low-quality    | Genome-fragment | NA | 1.26  |
| 59-final-viral-combined_k141_122966  full    | 1065  | No | NA | 0 | 0  | Low-quality    | Genome-fragment | NA | 2.9   |
| 59_k141_83667                                | 1007  | No | NA | 0 | 1  | Not-determined | Genome-fragment | NA | 0     |
| 59_k141_40215                                | 4880  | No | NA | 0 | 2  | Not-determined | Genome-fragment | NA | 0     |
| 59_k141_34586                                |       |    |    |   |    |                |                 |    |       |



|                                       |          |       |    |    |   |   |    |                |                 |      |   |
|---------------------------------------|----------|-------|----|----|---|---|----|----------------|-----------------|------|---|
| S17-final-viral-combined_k141_1567541 | [full]   | 1065  | No | NA | 0 | 1 | 0  | Low-quality    | Genome-fragment | 2.01 | 0 |
| S9_k141_93758                         |          | 9212  | No | NA | 0 | 0 | 1  | Not-determined | Genome-fragment | NA   | 0 |
| S9_k141_34892                         |          | 1872  | No | NA | 0 | 0 | 2  | Not-determined | Genome-fragment | NA   | 0 |
| S9_k141_104620                        |          | 2587  | No | NA | 0 | 0 | 0  | Not-determined | Genome-fragment | NA   | 0 |
| S9_k141_88517                         |          | 1389  | No | NA | 0 | 0 | 1  | Not-determined | Genome-fragment | NA   | 0 |
| S9_k141_77112                         |          | 1172  | No | NA | 0 | 0 | 0  | Not-determined | Genome-fragment | NA   | 0 |
| S9_k141_120695                        |          | 3989  | No | NA | 0 | 0 | 4  | Not-determined | Genome-fragment | NA   | 0 |
| S9_k141_34898                         |          | 1384  | No | NA | 0 | 0 | 0  | Not-determined | Genome-fragment | NA   | 0 |
| S9_k141_88526                         |          | 9856  | No | NA | 0 | 0 | 9  | Not-determined | Genome-fragment | NA   | 0 |
| S9_k141_72217                         |          | 4695  | No | NA | 0 | 0 | 0  | Not-determined | Genome-fragment | NA   | 0 |
| S9_k141_8789                          |          | 2848  | No | NA | 0 | 0 | 1  | Not-determined | Genome-fragment | NA   | 0 |
| S17-k141_74023                        |          | 1065  | No | NA | 1 | 0 | 0  | Low-quality    | Genome-fragment | 0.67 | 0 |
| S12-final-viral-combined_k141_332320  | [full]   | 1065  | No | NA | 0 | 0 | 0  | Low-quality    | Genome-fragment | 2.84 | 0 |
| S9_k141_83927                         |          | 1626  | No | NA | 0 | 0 | 0  | Not-determined | Genome-fragment | NA   | 0 |
| S9_k141_72260                         |          | 1319  | No | NA | 0 | 0 | 1  | Not-determined | Genome-fragment | NA   | 0 |
| S9_k141_88605                         |          | 1093  | No | NA | 0 | 0 | 1  | Not-determined | Genome-fragment | NA   | 0 |
| S12_k141_314102                       |          | 1065  | No | NA | 0 | 0 | 0  | Low-quality    | Genome-fragment | 0.64 | 0 |
| S2_k141_14561                         |          | 1065  | No | NA | 0 | 0 | 1  | Low-quality    | Genome-fragment | 0.35 | 0 |
| S4_k141_29454                         |          | 1065  | No | NA | 0 | 0 | 0  | Low-quality    | Genome-fragment | 2.11 | 0 |
| S9_k141_115050                        |          | 1488  | No | NA | 0 | 0 | 1  | Not-determined | Genome-fragment | NA   | 0 |
| S9_k141_51500                         |          | 1355  | No | NA | 0 | 0 | 0  | Not-determined | Genome-fragment | NA   | 0 |
| S9_k141_45635                         |          | 1293  | No | NA | 0 | 0 | 0  | Not-determined | Genome-fragment | NA   | 0 |
| S9_k141_77823                         |          | 1385  | No | NA | 0 | 0 | 0  | Not-determined | Genome-fragment | NA   | 0 |
| S9_k141_125773                        |          | 1268  | No | NA | 0 | 0 | 1  | Not-determined | Genome-fragment | NA   | 0 |
| S9_k141_24647                         |          | 1005  | No | NA | 0 | 0 | 2  | Not-determined | Genome-fragment | NA   | 0 |
| S9_k141_40477                         |          | 1093  | No | NA | 0 | 0 | 1  | Not-determined | Genome-fragment | NA   | 0 |
| S9_k141_77857                         |          | 3712  | No | NA | 0 | 0 | 0  | Not-determined | Genome-fragment | NA   | 0 |
| S8_k141_1732                          |          | 1065  | No | NA | 1 | 0 | 0  | Low-quality    | Genome-fragment | 0.69 | 0 |
| S9-final-viral-combined_k141_41787    | [full]   | 1066  | No | NA | 0 | 0 | 0  | Low-quality    | Genome-fragment | 2.83 | 0 |
| S9-final-viral-combined_k141_95869    | [full]   | 1066  | No | NA | 0 | 0 | 0  | Low-quality    | Genome-fragment | 2.03 | 0 |
| S9_k141_104703                        |          | 1473  | No | NA | 0 | 0 | 1  | Not-determined | Genome-fragment | NA   | 0 |
| S9_k141_88715                         |          | 1538  | No | NA | 0 | 0 | 1  | Not-determined | Genome-fragment | NA   | 0 |
| S9_k141_13878                         |          | 1293  | No | NA | 0 | 0 | 1  | Not-determined | Genome-fragment | NA   | 0 |
| S9_k141_83978                         |          | 1564  | No | NA | 0 | 0 | 2  | Not-determined | Genome-fragment | NA   | 0 |
| S9_k141_120958                        |          | 1668  | No | NA | 0 | 0 | 1  | Not-determined | Genome-fragment | NA   | 0 |
| S11-final-viral-combined_k141_322719  | [full]   | 1066  | No | NA | 0 | 0 | 0  | Low-quality    | Genome-fragment | 0.75 | 0 |
| S9_k141_62279                         |          | 15206 | No | NA | 0 | 0 | 7  | Not-determined | Genome-fragment | NA   | 0 |
| S9_k141_35211                         |          | 1114  | No | NA | 0 | 0 | 0  | Not-determined | Genome-fragment | NA   | 0 |
| S9_k141_24745                         |          | 3919  | No | NA | 0 | 0 | 1  | Not-determined | Genome-fragment | NA   | 0 |
| S9_k141_8971                          |          | 3000  | No | NA | 0 | 0 | 0  | Not-determined | Genome-fragment | NA   | 0 |
| S9_k141_9031                          |          | 2229  | No | NA | 0 | 0 | 1  | Not-determined | Genome-fragment | NA   | 0 |
| S1-final-viral-combined_k141_346882   | [full]   | 1066  | No | NA | 1 | 0 | 0  | Low-quality    | Genome-fragment | 1.91 | 0 |
| S9_k141_35280                         |          | 11818 | No | NA | 0 | 0 | 9  | Not-determined | Genome-fragment | NA   | 0 |
| S9_k141_57251                         |          | 15440 | No | NA | 0 | 0 | 30 | Not-determined | Genome-fragment | NA   | 0 |
| S9_k141_57274                         |          | 1952  | No | NA | 0 | 0 | 2  | Not-determined | Genome-fragment | NA   | 0 |
| S9_k141_78031                         |          | 2178  | No | NA | 0 | 0 | 1  | Not-determined | Genome-fragment | NA   | 0 |
| S9_k141_121078                        |          | 1353  | No | NA | 0 | 0 | 0  | Not-determined | Genome-fragment | NA   | 0 |
| S9_k141_3581                          |          | 1680  | No | NA | 0 | 0 | 0  | Not-determined | Genome-fragment | NA   | 0 |
| S9_k141_67314                         |          | 1559  | No | NA | 0 | 0 | 1  | Not-determined | Genome-fragment | NA   | 0 |
| S1-final-viral-combined_k141_19422    | [full]   | 1066  | No | NA | 0 | 0 | 1  | Low-quality    | Genome-fragment | 1.67 | 0 |
| S9_k141_88971                         |          | 6836  | No | NA | 0 | 0 | 1  | Not-determined | Genome-fragment | NA   | 0 |
| S9_k141_26219                         |          | 1051  | No | NA | 0 | 0 | 1  | Not-determined | Genome-fragment | NA   | 0 |
| S9_k141_45866                         |          | 4630  | No | NA | 0 | 0 | 3  | Not-determined | Genome-fragment | NA   | 0 |
| S1-final-viral-combined_k141_173169   | [full]   | 1066  | No | NA | 0 | 0 | 0  | Low-quality    | Genome-fragment | 2.66 | 0 |
| S9_k141_72404                         |          | 4609  | No | NA | 0 | 0 | 4  | Not-determined | Genome-fragment | NA   | 0 |
| S3-final-viral-combined_k141_69815    | [full]   | 1066  | No | NA | 0 | 0 | 0  | Low-quality    | Genome-fragment | 1.6  | 0 |
| S9_k141_45892                         |          | 1492  | No | NA | 0 | 0 | 1  | Not-determined | Genome-fragment | NA   | 0 |
| S9_k141_105980                        |          | 1349  | No | NA | 0 | 0 | 0  | Not-determined | Genome-fragment | NA   | 0 |
| S3_k141_80874                         |          | 1066  | No | NA | 0 | 0 | 0  | Low-quality    | Genome-fragment | 1.35 | 0 |
| S5_k141_64072                         |          | 1066  | No | NA | 0 | 0 | 1  | Low-quality    | Genome-fragment | 3.54 | 0 |
| S9_k141_3725                          |          | 3217  | No | NA | 0 | 0 | 2  | Not-determined | Genome-fragment | NA   | 0 |
| S7_k141_78129                         |          | 1066  | No | NA | 0 | 0 | 0  | Low-quality    | Genome-fragment | 2.4  | 0 |
| S9_k141_84138                         |          | 7744  | No | NA | 0 | 0 | 1  | Not-determined | Genome-fragment | NA   | 0 |
| S17-final-viral-combined_k141_38771   | [full]   | 1066  | No | NA | 1 | 0 | 0  | Low-quality    | Genome-fragment | 3.72 | 0 |
| S9_k141_89053                         |          | 1365  | No | NA | 0 | 0 | 0  | Not-determined | Genome-fragment | NA   | 0 |
| S12-final-viral-combined_k141_339232  | [full]   | 1066  | No | NA | 0 | 0 | 0  | Low-quality    | Genome-fragment | 2.94 | 0 |
| S12-final-viral-combined_k141_23361   | [full]   | 1066  | No | NA | 0 | 0 | 1  | Low-quality    | Genome-fragment | 1.37 | 0 |
| S9_k141_45915                         |          | 2674  | No | NA | 0 | 0 | 0  | Not-determined | Genome-fragment | NA   | 0 |
| S9_k141_93843                         |          | 2424  | No | NA | 0 | 0 | 2  | Not-determined | Genome-fragment | NA   | 0 |
| S9_k141_121222                        |          | 1697  | No | NA | 0 | 0 | 1  | Not-determined | Genome-fragment | NA   | 0 |
| S9_k141_52017                         |          | 2018  | No | NA | 0 | 0 | 1  | Not-determined | Genome-fragment | NA   | 0 |
| S9_k141_62516                         |          | 2163  | No | NA | 0 | 0 | 1  | Not-determined | Genome-fragment | NA   | 0 |
| S12-final-viral-combined_k141_248808  | [full]   | 1066  | No | NA | 0 | 0 | 0  | Low-quality    | Genome-fragment | 1.29 | 0 |
| S9_k141_78223                         |          | 1093  | No | NA | 0 | 0 | 1  | Not-determined | Genome-fragment | NA   | 0 |
| S9_k141_67426                         |          | 1683  | No | NA | 0 | 0 | 0  | Not-determined | Genome-fragment | NA   | 0 |
| S9_k141_72487                         |          | 1203  | No | NA | 0 | 0 | 0  | Not-determined | Genome-fragment | NA   | 0 |
| S9_k141_45935                         |          | 2214  | No | NA | 0 | 0 | 0  | Not-determined | Genome-fragment | NA   | 0 |
| S9_k141_3814                          |          | 3043  | No | NA | 0 | 0 | 2  | Not-determined | Genome-fragment | NA   | 0 |
| S9_k141_45936                         |          | 1197  | No | NA | 0 | 0 | 0  | Not-determined | Genome-fragment | NA   | 0 |
| S9_k141_104932                        |          | 2823  | No | NA | 0 | 0 | 2  | Not-determined | Genome-fragment | NA   | 0 |
| S12-final-viral-combined_k141_400887  | [full]   | 1066  | No | NA | 0 | 0 | 0  | Low-quality    | Genome-fragment | 1.2  | 0 |
| S9_k141_40601                         |          | 1429  | No | NA | 0 | 0 | 2  | Not-determined | Genome-fragment | NA   | 0 |
| S9_k141_14004                         |          | 6947  | No | NA | 0 | 0 | 3  | Not-determined | Genome-fragment | NA   | 0 |
| S12-final-viral-combined_k141_3458    | [H2gene] | 1066  | No | NA | 0 | 0 | 1  | Low-quality    | Genome-fragment | 1.43 | 0 |
| S9_k141_3842                          |          | 22440 | No | NA | 0 | 0 | 8  | Not-determined | Genome-fragment | NA   | 0 |
| S9_k141_105676                        |          | 2208  | No | NA | 0 | 0 | 2  | Not-determined | Genome-fragment | NA   | 0 |
| S12_k141_122436                       |          | 1066  | No | NA | 0 | 0 | 0  | Low-quality    | Genome-fragment | 2.28 | 0 |
| S9_k141_93943                         |          | 4238  | No | NA | 0 | 0 | 2  | Not-determined | Genome-fragment | NA   | 0 |
| S9_k141_29785                         |          | 4514  | No | NA | 0 | 0 | 2  | Not-determined | Genome-fragment | NA   | 0 |
| S9_k141_115550                        |          | 1162  | No | NA | 0 | 0 | 1  | Not-determined | Genome-fragment | NA   | 0 |
| S2-final-viral-combined_k141_48890    | [full]   | 1066  | No | NA | 0 | 0 | 1  | Low-quality    | Genome-fragment | 0.87 | 0 |
| S9_k141_126104                        |          | 1147  | No | NA | 0 | 0 | 0  | Not-determined | Genome-fragment | NA   | 0 |
| S2_k141_83974                         |          | 1066  | No | NA | 1 | 0 | 0  | Low-quality    | Genome-fragment | 3.8  | 0 |
| S9_k141_84236                         |          | 22854 | No | NA | 0 | 0 | 1  | Not-determined | Genome-fragment | NA   | 0 |
| S9_k141_45964                         |          | 2472  | No | NA | 0 | 0 | 1  | Not-determined | Genome-fragment | NA   | 0 |
| S9_k141_3864                          |          | 1129  | No | NA | 0 | 0 | 0  | Not-determined | Genome-fragment | NA   | 0 |
| S9_k141_72611                         |          | 6580  | No | NA | 0 | 0 | 2  | Not-determined | Genome-fragment | NA   | 0 |
| S9_k141_9222                          |          | 1358  | No | NA | 0 | 0 | 2  | Not-determined | Genome-fragment | NA   | 0 |
| S6-final-viral-combined_k141_51172    | [full]   | 1066  | No | NA | 0 | 0 | 0  | Low-quality    | Genome-fragment | 0.91 | 0 |
| S9_k141_67536                         |          | 6390  | No | NA | 0 | 0 | 1  | Not-determined | Genome-fragment | NA   | 0 |
| S9_k141_67537                         |          | 1365  | No | NA | 0 | 0 | 1  | Not-determined | Genome-fragment | NA   | 0 |
| S8-final-viral-combined_k141_5301     | [full]   | 1066  | No | NA | 2 | 0 | 0  | Low-quality    | Genome-fragment | 1.3  | 0 |
| S9-final-viral-combined_k141_7001     | [full]   | 1067  | No | NA | 0 | 0 | 0  | Low-quality    | Genome-fragment | 2.4  | 0 |
| S9_k141_78416                         |          | 6381  | No | NA | 0 | 0 | 9  | Not-determined | Genome-fragment | NA   | 0 |
| S9_k141_67584                         |          | 2197  | No | NA | 0 | 0 | 1  | Not-determined | Genome-fragment | NA   | 0 |
| S9_k141_9237                          |          | 1101  | No | NA | 0 | 0 | 1  | Not-determined | Genome-fragment | NA   | 0 |
| S9_k141_14170                         |          | 1316  | No | NA | 0 | 0 | 1  | Not-determined | Genome-fragment | NA   | 0 |
| S9_k141_115567                        |          | 3425  | No | NA | 0 | 0 | 1  | Not-determined | Genome-fragment | NA   | 0 |
| S9_k141_78516                         |          | 1373  | No | NA | 0 | 0 | 1  | Not-determined | Genome-fragment | NA   | 0 |
| S9_k141_14246                         |          | 1753  | No | NA | 0 | 0 | 1  | Not-determined | Genome-fragment | NA   | 0 |
| S1-final-viral-combined_k141_219231   | [H2gene] | 1067  | No | NA | 1 | 0 | 0  | Low-quality    | Genome-fragment | 2.88 | 0 |
| S9_k141_84314                         |          | 1246  | No | NA | 0 | 0 | 0  | Not-determined | Genome-fragment | NA   | 0 |
| S17-final-viral-combined_k141_53502   | [H2gene] | 1067  | No | NA | 1 | 0 | 0  | Low-quality    | Genome-fragment | 2.47 | 0 |
| S9_k141_52237                         |          | 1678  | No | NA | 0 | 0 | 1  | Not-determined | Genome-fragment | NA   | 0 |
| S9_k141_57500                         |          | 1967  | No | NA | 0 | 0 | 5  | Not-determined | Genome-fragment | NA   | 0 |
| S12-final-viral-combined_k141_362570  | [full]   | 1067  | No | NA | 0 | 0 | 0  | Low-quality    | Genome-fragment | 1.6  | 0 |
| S9_k141_40736                         |          | 1367  | No | NA | 0 | 0 | 1  | Not-determined | Genome-fragment | NA   | 0 |
| S2-final-viral-combined_k141_186346   | [full]   | 1067  | No | NA | 0 | 0 | 2  | Low-quality    | Genome-fragment | 0.29 | 0 |
| S9_k141_121605                        |          | 1132  | No | NA | 0 | 0 | 1  | Not-determined | Genome-fragment | NA   | 0 |
| S9_k141_78631                         |          | 1003  | No | NA | 0 | 0 | 0  | Not-determined | Genome-fragment | NA   | 0 |
| S9_k141_9398                          |          | 1248  | No | NA | 0 | 0 | 0  | Not-determined | Genome-fragment | NA   | 0 |
| S9_k141_20045                         |          | 1015  | No | NA | 0 | 0 | 0  | Not-determined | Genome-fragment | NA   | 0 |
| S9_k141_4059                          |          | 1387  | No | NA | 0 | 0 | 0  | Not-determined | Genome-fragment | NA   | 0 |
| S9_k141_14434                         |          | 1523  | No | NA | 0 | 0 | 1  | Not-determined | Genome-fragment | NA   | 0 |
| S4-final-viral-combined_k141_139665   | [full]   | 1067  | No | NA | 2 | 0 | 0  | Low-quality    | Genome-fragment | 2.52 | 0 |
| S9_k141_72715                         |          | 3091  | No | NA | 0 | 0 | 0  | Not-determined | Genome-fragment | NA   | 0 |
| S9_k141_14445                         |          | 2176  | No | NA | 0 | 0 | 0  | Not-determined | Genome-fragment | NA   | 0 |
| S9_k141_40764                         |          | 1327  | No | NA | 0 | 0 | 1  | Not-determined | Genome-fragment | NA   | 0 |
| S9_k141_105984                        |          | 1153  | No | NA | 0 | 0 | 1  | Not-determined | Genome-fragment | NA   | 0 |
| S9_k141_14447                         |          | 3643  | No | NA | 0 | 0 | 2  | Not-determined | Genome-fragment | NA   | 0 |
| S9_k141_72722                         |          | 1027  | No | NA | 0 | 0 | 1  | Not-determined | Genome-fragment | NA   | 0 |
| S4-final-viral-com                    |          |       |    |    |   |   |    |                |                 |      |   |



|                                              |          |    |   |    |                |                 |    |      |
|----------------------------------------------|----------|----|---|----|----------------|-----------------|----|------|
| 59_k141_100042                               | 4220 No  | NA | 0 | 9  | Not-determined | Genome-fragment | NA | 0    |
| 59_k141_41073                                | 8200 No  | NA | 0 | 5  | Not-determined | Genome-fragment | NA | 0    |
| 59_k141_35553                                | 1792 No  | NA | 0 | 1  | Not-determined | Genome-fragment | NA | 0    |
| 59_k141_73005                                | 1012 No  | NA | 0 | 1  | Not-determined | Genome-fragment | NA | 0    |
| 59_k141_57764                                | 1055 No  | NA | 0 | 1  | Not-determined | Genome-fragment | NA | 0    |
| 59_k141_110142                               | 1294 No  | NA | 0 | 1  | Not-determined | Genome-fragment | NA | 0    |
| 59_k141_126533                               | 1083 No  | NA | 0 | 1  | Not-determined | Genome-fragment | NA | 0    |
| 511_k141_19439                               | 1068 No  | NA | 0 | 0  | Low-quality    | Genome-fragment | NA | 0    |
| 51-final-viral-combined_k141_118705  full    | 1068 No  | NA | 0 | 0  | Low-quality    | Genome-fragment | NA | 2.47 |
| 59_k141_94378                                | 4509 No  | NA | 0 | 5  | Not-determined | Genome-fragment | NA | 0    |
| 59_k141_73103                                | 1329 No  | NA | 0 | 1  | Not-determined | Genome-fragment | NA | 0    |
| 57-final-viral-combined_k141_116441  full    | 1068 No  | NA | 0 | 1  | Low-quality    | Genome-fragment | NA | 1.9  |
| 57-final-viral-combined_k141_16034  full     | 1068 No  | NA | 0 | 0  | Low-quality    | Genome-fragment | NA | 4.06 |
| 59_k141_116116                               | 1007 No  | NA | 0 | 1  | Not-determined | Genome-fragment | NA | 0    |
| 57_k141_154351                               | 1068 No  | NA | 0 | 0  | Low-quality    | Genome-fragment | NA | 2.29 |
| 59_k141_73144                                | 1018 No  | NA | 0 | 0  | Not-determined | Genome-fragment | NA | 0    |
| 59_k141_35952                                | 11525 No | NA | 0 | 24 | Not-determined | Genome-fragment | NA | 0    |
| 59_k141_94481                                | 1797 No  | NA | 0 | 1  | Not-determined | Genome-fragment | NA | 0    |
| 59_k141_9685                                 | 1081 No  | NA | 0 | 0  | Not-determined | Genome-fragment | NA | 0    |
| 59_k141_126566                               | 2636 No  | NA | 0 | 1  | Not-determined | Genome-fragment | NA | 0    |
| 59_k141_84727                                | 1071 No  | NA | 0 | 2  | Not-determined | Genome-fragment | NA | 0    |
| 59_k141_5717                                 | 2121 No  | NA | 0 | 1  | Not-determined | Genome-fragment | NA | 0    |
| 59_k141_30378                                | 1142 No  | NA | 0 | 0  | Not-determined | Genome-fragment | NA | 0    |
| 517-final-viral-combined_k141_81874  full    | 1068 No  | NA | 1 | 0  | Low-quality    | Genome-fragment | NA | 2.52 |
| 59_k141_57848                                | 1073 No  | NA | 0 | 1  | Not-determined | Genome-fragment | NA | 0    |
| 59_k141_4442                                 | 2853 No  | NA | 0 | 0  | Not-determined | Genome-fragment | NA | 0    |
| 59_k141_122107                               | 1244 No  | NA | 0 | 0  | Not-determined | Genome-fragment | NA | 0    |
| 59_k141_94521                                | 3163 No  | NA | 0 | 3  | Not-determined | Genome-fragment | NA | 0    |
| 59_k141_73186                                | 1367 No  | NA | 0 | 1  | Not-determined | Genome-fragment | NA | 0    |
| 59_k141_122119                               | 1472 No  | NA | 0 | 2  | Not-determined | Genome-fragment | NA | 0    |
| 59_k141_63353                                | 1017 No  | NA | 0 | 0  | Not-determined | Genome-fragment | NA | 0    |
| 59_k141_90013                                | 1302 No  | NA | 1 | 1  | Not-determined | Genome-fragment | NA | 0    |
| 59_k141_20372                                | 1123 No  | NA | 0 | 0  | Not-determined | Genome-fragment | NA | 0    |
| 517-final-viral-combined_k141_74577  full    | 1068 No  | NA | 0 | 1  | Low-quality    | Genome-fragment | NA | 0.75 |
| 59_k141_116247                               | 3713 No  | NA | 0 | 3  | Not-determined | Genome-fragment | NA | 0    |
| 59_k141_20377                                | 3184 No  | NA | 0 | 0  | Not-determined | Genome-fragment | NA | 0    |
| 512_k141_228689                              | 1068 No  | NA | 0 | 2  | Low-quality    | Genome-fragment | NA | 0.32 |
| 59_k141_52748                                | 1213 No  | NA | 0 | 3  | Not-determined | Genome-fragment | NA | 0    |
| 59_k141_52759                                | 1161 No  | NA | 0 | 1  | Not-determined | Genome-fragment | NA | 0    |
| 58-final-viral-combined_k141_264432  full    | 1068 No  | NA | 0 | 1  | Low-quality    | Genome-fragment | NA | 0.91 |
| 59_k141_14831                                | 1010 No  | NA | 0 | 0  | Not-determined | Genome-fragment | NA | 0    |
| 59_k141_25687                                | 1094 No  | NA | 0 | 0  | Not-determined | Genome-fragment | NA | 0    |
| 59_k141_90075                                | 4065 No  | NA | 0 | 2  | Not-determined | Genome-fragment | NA | 0    |
| 59-final-viral-combined_k141_16387  full     | 1069 No  | NA | 0 | 1  | Low-quality    | Genome-fragment | NA | 8.32 |
| 59_k141_122207                               | 1515 No  | NA | 0 | 2  | Not-determined | Genome-fragment | NA | 0    |
| 511-final-viral-combined_k141_33341  full    | 1069 No  | NA | 0 | 0  | Low-quality    | Genome-fragment | NA | 1.78 |
| 511-final-viral-combined_k141_219851  full   | 1069 No  | NA | 0 | 1  | Low-quality    | Genome-fragment | NA | 0.44 |
| 59_k141_68476                                | 1399 No  | NA | 0 | 0  | Not-determined | Genome-fragment | NA | 0    |
| 59_k141_84937                                | 1140 No  | NA | 0 | 1  | Not-determined | Genome-fragment | NA | 0    |
| 59_k141_52780                                | 2869 No  | NA | 0 | 1  | Not-determined | Genome-fragment | NA | 0    |
| 51_k141_337552                               | 1069 No  | NA | 0 | 1  | Low-quality    | Genome-fragment | NA | 0.18 |
| 59_k141_110128                               | 2002 No  | NA | 0 | 0  | Not-determined | Genome-fragment | NA | 0    |
| 59_k141_41272                                | 1066 No  | NA | 0 | 1  | Not-determined | Genome-fragment | NA | 0    |
| 59_k141_57964                                | 1182 No  | NA | 0 | 0  | Not-determined | Genome-fragment | NA | 0    |
| 59_k141_79122                                | 1195 No  | NA | 0 | 0  | Not-determined | Genome-fragment | NA | 0    |
| 55-final-viral-combined_k141_211317  full    | 1069 No  | NA | 0 | 0  | Low-quality    | Genome-fragment | NA | 1.99 |
| 55-final-viral-combined_k141_33780  full     | 1069 No  | NA | 0 | 1  | Low-quality    | Genome-fragment | NA | 0.91 |
| 59_k141_25724                                | 1058 No  | NA | 0 | 0  | Not-determined | Genome-fragment | NA | 0    |
| 59_k141_68526                                | 3507 No  | NA | 0 | 2  | Not-determined | Genome-fragment | NA | 0    |
| 55-final-viral-combined_k141_25411  full     | 1069 No  | NA | 0 | 0  | Low-quality    | Genome-fragment | NA | 1.87 |
| 59_k141_68542                                | 1072 No  | NA | 0 | 2  | Not-determined | Genome-fragment | NA | 0    |
| 59_k141_68549                                | 1275 No  | NA | 0 | 1  | Not-determined | Genome-fragment | NA | 0    |
| 59_k141_46627                                | 1174 No  | NA | 0 | 1  | Not-determined | Genome-fragment | NA | 0    |
| 59_k141_73409                                | 6462 No  | NA | 0 | 3  | Not-determined | Genome-fragment | NA | 0    |
| 59_k141_126662                               | 1273 No  | NA | 0 | 0  | Not-determined | Genome-fragment | NA | 0    |
| 55_k141_207017                               | 1069 No  | NA | 0 | 0  | Low-quality    | Genome-fragment | NA | 1.79 |
| 59_k141_122290                               | 1118 No  | NA | 0 | 0  | Not-determined | Genome-fragment | NA | 0    |
| 59_k141_36230                                | 1176 No  | NA | 0 | 1  | Not-determined | Genome-fragment | NA | 0    |
| 59_k141_36238                                | 1256 No  | NA | 0 | 0  | Not-determined | Genome-fragment | NA | 0    |
| 59_k141_116337                               | 1603 No  | NA | 0 | 0  | Not-determined | Genome-fragment | NA | 0    |
| 59_k141_90190                                | 5336 No  | NA | 0 | 0  | Not-determined | Genome-fragment | NA | 0    |
| 55_k141_202930                               | 1069 No  | NA | 0 | 1  | Low-quality    | Genome-fragment | NA | 0.5  |
| 517-final-viral-combined_k141_61342  H2gene  | 1069 No  | NA | 1 | 0  | Low-quality    | Genome-fragment | NA | 2.34 |
| 512-final-viral-combined_k141_110038  full   | 1069 No  | NA | 0 | 0  | Low-quality    | Genome-fragment | NA | 1.69 |
| 59_k141_4577                                 | 1421 No  | NA | 0 | 0  | Not-determined | Genome-fragment | NA | 0    |
| 56-final-viral-combined_k141_21155  full     | 1069 No  | NA | 1 | 0  | Low-quality    | Genome-fragment | NA | 1.76 |
| 59_k141_100349                               | 3838 No  | NA | 0 | 3  | Not-determined | Genome-fragment | NA | 0    |
| 59_k141_52872                                | 1218 No  | NA | 0 | 1  | Not-determined | Genome-fragment | NA | 0    |
| 58_k141_248856                               | 1069 No  | NA | 0 | 1  | Low-quality    | Genome-fragment | NA | 0.73 |
| 59_k141_94761                                | 5607 No  | NA | 0 | 5  | Not-determined | Genome-fragment | NA | 0    |
| 59_k141_4584                                 | 1161 No  | NA | 0 | 0  | Not-determined | Genome-fragment | NA | 0    |
| 59_k141_90214                                | 3450 No  | NA | 0 | 0  | Not-determined | Genome-fragment | NA | 0    |
| 59_k141_110408                               | 1152 No  | NA | 0 | 0  | Not-determined | Genome-fragment | NA | 0    |
| 59_k141_122314                               | 1169 No  | NA | 0 | 1  | Not-determined | Genome-fragment | NA | 0    |
| 59_k141_46708                                | 4237 No  | NA | 0 | 0  | Not-determined | Genome-fragment | NA | 0    |
| 59_k141_79332                                | 1449 No  | NA | 0 | 0  | Not-determined | Genome-fragment | NA | 0    |
| 59_k141_36269                                | 1069 No  | NA | 0 | 0  | Not-determined | Genome-fragment | NA | 0    |
| 59_k141_49616                                | 1070 No  | NA | 0 | 1  | Low-quality    | Genome-fragment | NA | 2.55 |
| 511_k141_271466                              | 1070 No  | NA | 1 | 0  | Low-quality    | Genome-fragment | NA | 0.62 |
| 59_k141_79373                                | 7864 No  | NA | 0 | 5  | Not-determined | Genome-fragment | NA | 0    |
| 59_k141_73468                                | 2553 No  | NA | 0 | 2  | Not-determined | Genome-fragment | NA | 0    |
| 59_k141_15040                                | 1072 No  | NA | 0 | 0  | Not-determined | Genome-fragment | NA | 0    |
| 59_k141_20599                                | 1502 No  | NA | 0 | 1  | Not-determined | Genome-fragment | NA | 0    |
| 59_k141_25887                                | 6057 No  | NA | 0 | 6  | Not-determined | Genome-fragment | NA | 0    |
| 59_k141_30689                                | 1077 No  | NA | 0 | 1  | Not-determined | Genome-fragment | NA | 0    |
| 59_k141_20618                                | 4564 No  | NA | 0 | 0  | Not-determined | Genome-fragment | NA | 0    |
| 59_k141_25911                                | 1039 No  | NA | 0 | 1  | Not-determined | Genome-fragment | NA | 0    |
| 59_k141_63720                                | 6385 No  | NA | 0 | 4  | Not-determined | Genome-fragment | NA | 0    |
| 59_k141_130748                               | 1460 No  | NA | 0 | 1  | Not-determined | Genome-fragment | NA | 0    |
| 51-final-viral-combined_k141_104636  full    | 1070 No  | NA | 1 | 0  | Low-quality    | Genome-fragment | NA | 1.68 |
| 59_k141_20655                                | 4108 No  | NA | 0 | 0  | Not-determined | Genome-fragment | NA | 0    |
| 59_k141_130750                               | 3047 No  | NA | 0 | 4  | Not-determined | Genome-fragment | NA | 0    |
| 51-final-viral-combined_k141_125132  full    | 1070 No  | NA | 0 | 0  | Low-quality    | Genome-fragment | NA | 0.81 |
| 59_k141_79460                                | 1496 No  | NA | 0 | 0  | Not-determined | Genome-fragment | NA | 0    |
| 59_k141_84912                                | 1733 No  | NA | 0 | 1  | Not-determined | Genome-fragment | NA | 0    |
| 59_k141_36371                                | 1947 No  | NA | 0 | 0  | Not-determined | Genome-fragment | NA | 0    |
| 59_k141_36377                                | 1253 No  | NA | 0 | 0  | Not-determined | Genome-fragment | NA | 0    |
| 59_k141_58187                                | 1576 No  | NA | 0 | 1  | Not-determined | Genome-fragment | NA | 0    |
| 59_k141_122479                               | 5221 No  | NA | 0 | 0  | Not-determined | Genome-fragment | NA | 0    |
| 51-final-viral-combined_k141_266863  H2gene  | 1070 No  | NA | 1 | 0  | Low-quality    | Genome-fragment | NA | 3.17 |
| 59_k141_68832                                | 6574 No  | NA | 0 | 1  | Not-determined | Genome-fragment | NA | 0    |
| 59_k141_73523                                | 4115 No  | NA | 0 | 0  | Not-determined | Genome-fragment | NA | 0    |
| 59_k141_94935                                | 1209 No  | NA | 0 | 1  | Not-determined | Genome-fragment | NA | 0    |
| 59_k141_36423                                | 3183 No  | NA | 0 | 4  | Not-determined | Genome-fragment | NA | 0    |
| 59_k141_25999                                | 1171 No  | NA | 0 | 0  | Not-determined | Genome-fragment | NA | 0    |
| 59_k141_53058                                | 3310 No  | NA | 0 | 2  | Not-determined | Genome-fragment | NA | 0    |
| 59_k141_20698                                | 1106 No  | NA | 0 | 0  | Not-determined | Genome-fragment | NA | 0    |
| 59_k141_30756                                | 3188 No  | NA | 0 | 2  | Not-determined | Genome-fragment | NA | 0    |
| 59_k141_4718                                 | 1392 No  | NA | 0 | 0  | Not-determined | Genome-fragment | NA | 0    |
| 59_k141_85049                                | 1654 No  | NA | 0 | 2  | Not-determined | Genome-fragment | NA | 0    |
| 59_k141_94970                                | 1834 No  | NA | 0 | 2  | Not-determined | Genome-fragment | NA | 0    |
| 59_k141_94986                                | 3938 No  | NA | 0 | 0  | Not-determined | Genome-fragment | NA | 0    |
| 59_k141_68908                                | 1212 No  | NA | 0 | 0  | Not-determined | Genome-fragment | NA | 0    |
| 51-final-viral-combined_k141_160650  H2gene  | 1070 No  | NA | 1 | 0  | Low-quality    | Genome-fragment | NA | 2.18 |
| 59_k141_10126                                | 2121 No  | NA | 0 | 1  | Not-determined | Genome-fragment | NA | 0    |
| 59_k141_53114                                | 2871 No  | NA | 0 | 1  | Not-determined | Genome-fragment | NA | 0    |
| 59_k141_94997                                | 6999 No  | NA | 0 | 2  | Not-determined | Genome-fragment | NA | 0    |
| 57-final-viral-combined_k141_136498  full    | 1070 No  | NA | 0 | 1  | Low-quality    | Genome-fragment | NA | 2.26 |
| 59_k141_20764                                | 1879 No  | NA | 0 | 1  | Not-determined | Genome-fragment | NA | 0    |
| 57-final-viral-combined_k141_45468  full     | 1070 No  | NA | 0 | 0  | Low-quality    | Genome-fragment | NA | 1.96 |
| 59_k141_90492                                | 3505 No  | NA | 0 | 1  | Not-determined | Genome-fragment | NA | 0    |
| 59_k141_20777                                | 4115 No  | NA | 0 | 2  | Not-determined | Genome-fragment | NA | 0    |
| 517-final-viral-combined_k141_59998  H2gene  | 1070 No  | NA | 1 | 0  | Low-quality    | Genome-fragment | NA | 0.74 |
| 517_k141_158541                              | 1070 No  | NA | 0 | 1  | Low-quality    | Genome-fragment | NA | 0.75 |
| 59_k141_41592                                | 1001 No  | NA | 0 | 0  | Not-determined | Genome-fragment | NA | 0    |
| 512-final-viral-combined_k141_153084  H2gene | 1070 No  | NA | 1 | 0  | Low-quality    | Genome-fragment | NA | 0.74 |
| 59_k141_15199                                | 1036 No  | NA | 0 | 1  | Not-determined | Genome-fragment | NA | 0    |
| 59_k141_15230                                | 9630 No  | NA | 0 | 3  | Not-determined | Genome-fragment | NA | 0    |
| 59_k141_85198                                | 1310 No  | NA | 0 | 1  | Not-determined | Genome-fragment | NA | 0    |
| 59_k141_110589                               | 3615 No  | NA | 0 | 1  | Not-determined | Genome-fragment | NA | 0    |
| 59_k141_95068                                | 1427 No  | NA | 0 | 0  | Not-determined | Genome-fragment | NA | 0    |
| 59_k141_15250                                | 1512 No  | NA | 0 | 1  | Not-determined | Genome-fragment | NA | 0    |
| 59_k141_73608                                | 15847 No | NA | 0 | 10 | Not-determined | Genome-fragment | NA | 0    |
| 512-final-viral-combined_k141_375264  H2gene | 1070 No  | NA | 1 | 0  | Low-quality    | Genome-fragment | NA | 1.79 |
| 59_k141_20862                                | 3613 No  | NA | 0 | 3  | Not-determined | Genome-fragment | NA | 0    |
| 512_k141_311026                              | 1070 No  | NA | 1 | 0  | Low-quality    | Genome-fragment | NA | 1.91 |
| 59_k141_116571                               | 5288 No  | NA | 0 | 3  | Not-determined | Genome-fragment | NA | 0    |
| 59_k141_95089                                | 1355 No  | NA | 0 | 0  | Not-determined | Genome-fragment | NA | 0    |
| 59_k141_90693                                | 1088 No  | NA | 0 | 1  | Not-determined | Genome-fragment | NA | 0    |
| 59_k141_20883                                | 7317 No  | NA | 0 | 5  | Not-determined | Genome-fragment | NA | 0    |
| 59_k141_126967                               | 1338 No  | NA | 0 | 0  | Not-determined | Genome-fragment | NA | 0    |
| 54-final-viral-combined_k141_160099  full    | 1070 No  | NA | 1 | 0  | Low-quality    | Genome-fragment | NA | 1.71 |
| 54_k141_                                     |          |    |   |    |                |                 |    |      |



|                                               |       |    |    |   |   |                |                 |       |   |
|-----------------------------------------------|-------|----|----|---|---|----------------|-----------------|-------|---|
| 59_k141_58405                                 | 1866  | No | NA | 0 | 0 | Not-determined | Genome-fragment | NA    | 0 |
| 59_k141_53398                                 | 4849  | No | NA | 0 | 2 | Not-determined | Genome-fragment | NA    | 0 |
| 59_k141_5083                                  | 1712  | No | NA | 0 | 1 | Not-determined | Genome-fragment | NA    | 0 |
| 59_k141_105843                                | 1204  | No | NA | 0 | 2 | Not-determined | Genome-fragment | NA    | 0 |
| 59_k141_10313                                 | 3213  | No | NA | 0 | 0 | Not-determined | Genome-fragment | NA    | 0 |
| 59_k141_15499                                 | 5249  | No | NA | 0 | 1 | Not-determined | Genome-fragment | NA    | 0 |
| 59_k141_41969                                 | 2462  | No | NA | 0 | 0 | Not-determined | Genome-fragment | NA    | 0 |
| 59_k141_10326                                 | 1100  | No | NA | 0 | 0 | Not-determined | Genome-fragment | NA    | 0 |
| 59_k141_15514                                 | 1009  | No | NA | 0 | 0 | Not-determined | Genome-fragment | NA    | 0 |
| 59_k141_122739                                | 1684  | No | NA | 0 | 1 | Not-determined | Genome-fragment | NA    | 0 |
| 59_k141_31062                                 | 1170  | No | NA | 0 | 0 | Not-determined | Genome-fragment | NA    | 0 |
| 59_k141_101055                                | 2957  | No | NA | 0 | 3 | Not-determined | Genome-fragment | NA    | 0 |
| 59_k141_79893                                 | 1903  | No | NA | 0 | 2 | Not-determined | Genome-fragment | NA    | 0 |
| 59_k141_95175                                 | 1471  | No | NA | 0 | 1 | Not-determined | Genome-fragment | NA    | 0 |
| 59_k141_101079                                | 3259  | No | NA | 0 | 4 | Not-determined | Genome-fragment | NA    | 0 |
| 59_k141_53450                                 | 4512  | No | NA | 0 | 2 | Not-determined | Genome-fragment | NA    | 0 |
| 59_k141_21049                                 | 7788  | No | NA | 0 | 1 | Not-determined | Genome-fragment | NA    | 0 |
| S12-final-viral-combined_k141_392331 [full]   | 1071  | No | NA | 1 | 0 | Low-quality    | Genome-fragment | 1.71  | 0 |
| S2-final-viral-combined_k141_88484 [full]     | 1071  | No | NA | 0 | 1 | Low-quality    | Genome-fragment | 0.9   | 0 |
| 59_k141_69296                                 | 1166  | No | NA | 0 | 2 | Not-determined | Genome-fragment | NA    | 0 |
| 59_k141_53470                                 | 1592  | No | NA | 0 | 1 | Not-determined | Genome-fragment | NA    | 0 |
| 59_k141_37086                                 | 1104  | No | NA | 0 | 0 | Not-determined | Genome-fragment | NA    | 0 |
| 59_k141_79953                                 | 1583  | No | NA | 0 | 1 | Not-determined | Genome-fragment | NA    | 0 |
| 59_k141_10407                                 | 2275  | No | NA | 0 | 2 | Not-determined | Genome-fragment | NA    | 0 |
| 59_k141_95241                                 | 1572  | No | NA | 0 | 1 | Not-determined | Genome-fragment | NA    | 0 |
| 59_k141_79980                                 | 1253  | No | NA | 0 | 1 | Not-determined | Genome-fragment | NA    | 0 |
| 59_k141_42021                                 | 3782  | No | NA | 0 | 2 | Not-determined | Genome-fragment | NA    | 0 |
| 59_k141_122809                                | 3496  | No | NA | 0 | 4 | Not-determined | Genome-fragment | NA    | 0 |
| 59_k141_37153                                 | 1175  | No | NA | 0 | 1 | Not-determined | Genome-fragment | NA    | 0 |
| 59_k141_106039                                | 4247  | No | NA | 0 | 3 | Not-determined | Genome-fragment | NA    | 0 |
| S3-final-viral-combined_k141_107381 [full]    | 1071  | No | NA | 0 | 1 | Low-quality    | Genome-fragment | 0.87  | 0 |
| 59_k141_26614                                 | 1174  | No | NA | 0 | 0 | Not-determined | Genome-fragment | NA    | 0 |
| 57_k141_239658                                | 1071  | No | NA | 0 | 0 | Low-quality    | Genome-fragment | 1.94  | 0 |
| 59_k141_21161                                 | 2323  | No | NA | 0 | 1 | Not-determined | Genome-fragment | NA    | 0 |
| 57_k141_182147                                | 1071  | No | NA | 1 | 0 | Low-quality    | Genome-fragment | 2.74  | 0 |
| 59_k141_106067                                | 3084  | No | NA | 0 | 2 | Not-determined | Genome-fragment | NA    | 0 |
| S12-final-viral-combined_k141_207024 [full]   | 1071  | No | NA | 0 | 0 | Low-quality    | Genome-fragment | 2.45  | 0 |
| S12-final-viral-combined_k141_347575 [full]   | 1071  | No | NA | 1 | 0 | Low-quality    | Genome-fragment | 2.65  | 0 |
| 59_k141_10480                                 | 3918  | No | NA | 1 | 0 | High-quality   | Genome-fragment | 94.63 | 0 |
| 59_k141_58594                                 | 1420  | No | NA | 0 | 3 | Not-determined | Genome-fragment | NA    | 0 |
| 59_k141_80008                                 | 2006  | No | NA | 0 | 2 | Not-determined | Genome-fragment | NA    | 0 |
| 59_k141_69458                                 | 1210  | No | NA | 0 | 0 | Not-determined | Genome-fragment | NA    | 0 |
| S12-final-viral-combined_k141_203417 [H2gene] | 1071  | No | NA | 2 | 0 | Low-quality    | Genome-fragment | 1.77  | 0 |
| 59_k141_69465                                 | 1512  | No | NA | 0 | 1 | Not-determined | Genome-fragment | NA    | 0 |
| 59_k141_74088                                 | 1335  | No | NA | 0 | 0 | Not-determined | Genome-fragment | NA    | 0 |
| S12-final-viral-combined_k141_277230 [H2gene] | 1071  | No | NA | 1 | 0 | Low-quality    | Genome-fragment | 0.88  | 0 |
| 59_k141_31251                                 | 1104  | No | NA | 0 | 0 | Not-determined | Genome-fragment | NA    | 0 |
| S2-final-viral-combined_k141_194534 [full]    | 1071  | No | NA | 0 | 0 | Low-quality    | Genome-fragment | 2.87  | 0 |
| 59_k141_15849                                 | 5805  | No | NA | 0 | 1 | Not-determined | Genome-fragment | NA    | 0 |
| 59_k141_101377                                | 6564  | No | NA | 0 | 3 | Not-determined | Genome-fragment | NA    | 0 |
| 59_k141_42187                                 | 1127  | No | NA | 0 | 1 | Not-determined | Genome-fragment | NA    | 0 |
| 59_k141_80116                                 | 3701  | No | NA | 0 | 2 | Not-determined | Genome-fragment | NA    | 0 |
| 58_k141_11460                                 | 1071  | No | NA | 0 | 0 | Low-quality    | Genome-fragment | 0.75  | 0 |
| 59_k141_37339                                 | 1076  | No | NA | 0 | 0 | Not-determined | Genome-fragment | NA    | 0 |
| S11-final-viral-combined_k141_10708 [full]    | 1072  | No | NA | 0 | 0 | Low-quality    | Genome-fragment | 1.1   | 0 |
| 59_k141_127153                                | 1426  | No | NA | 0 | 1 | Not-determined | Genome-fragment | NA    | 0 |
| 59_k141_31404                                 | 1197  | No | NA | 0 | 3 | Not-determined | Genome-fragment | NA    | 0 |
| 59_k141_10635                                 | 1015  | No | NA | 0 | 0 | Not-determined | Genome-fragment | NA    | 0 |
| S1-final-viral-combined_k141_7169 [full]      | 1072  | No | NA | 0 | 0 | Low-quality    | Genome-fragment | 2.05  | 0 |
| 59_k141_31434                                 | 4399  | No | NA | 0 | 2 | Not-determined | Genome-fragment | NA    | 0 |
| 59_k141_95543                                 | 3372  | No | NA | 0 | 4 | Not-determined | Genome-fragment | NA    | 0 |
| 59_k141_101466                                | 1176  | No | NA | 0 | 1 | Not-determined | Genome-fragment | NA    | 0 |
| S3-final-viral-combined_k141_73907 [full]     | 1072  | No | NA | 0 | 0 | Low-quality    | Genome-fragment | 1.01  | 0 |
| 59_k141_127258                                | 2589  | No | NA | 0 | 1 | Not-determined | Genome-fragment | NA    | 0 |
| 59_k141_16032                                 | 2373  | No | NA | 0 | 0 | Not-determined | Genome-fragment | NA    | 0 |
| 59_k141_47196                                 | 1044  | No | NA | 0 | 0 | Not-determined | Genome-fragment | NA    | 0 |
| 59_k141_101559                                | 1337  | No | NA | 0 | 1 | Not-determined | Genome-fragment | NA    | 0 |
| 59_k141_31504                                 | 1697  | No | NA | 0 | 2 | Not-determined | Genome-fragment | NA    | 0 |
| 59_k141_106243                                | 7672  | No | NA | 0 | 0 | Not-determined | Genome-fragment | NA    | 0 |
| S7-final-viral-combined_k141_180497 [H2gene]  | 1072  | No | NA | 1 | 0 | Low-quality    | Genome-fragment | 2.03  | 0 |
| 59_k141_42452                                 | 4460  | No | NA | 0 | 1 | Not-determined | Genome-fragment | NA    | 0 |
| 59_k141_31703                                 | 3511  | No | NA | 0 | 0 | Not-determined | Genome-fragment | NA    | 0 |
| S17-final-viral-combined_k141_187613 [full]   | 1072  | No | NA | 0 | 1 | Low-quality    | Genome-fragment | 0.56  | 0 |
| S17-k141_187897                               | 1072  | No | NA | 0 | 1 | Low-quality    | Genome-fragment | 0.6   | 0 |
| 59_k141_106461                                | 1175  | No | NA | 0 | 1 | Not-determined | Genome-fragment | NA    | 0 |
| 59_k141_31739                                 | 3184  | No | NA | 0 | 4 | Not-determined | Genome-fragment | NA    | 0 |
| 59_k141_117390                                | 1045  | No | NA | 0 | 1 | Not-determined | Genome-fragment | NA    | 0 |
| S12-final-viral-combined_k141_360696 [H2gene] | 1072  | No | NA | 1 | 0 | Low-quality    | Genome-fragment | 0.59  | 0 |
| 59_k141_106520                                | 1083  | No | NA | 0 | 0 | Not-determined | Genome-fragment | NA    | 0 |
| 59_k141_106559                                | 7978  | No | NA | 0 | 5 | Not-determined | Genome-fragment | NA    | 0 |
| 59_k141_117520                                | 1082  | No | NA | 0 | 0 | Not-determined | Genome-fragment | NA    | 0 |
| 59_k141_42648                                 | 2201  | No | NA | 0 | 1 | Not-determined | Genome-fragment | NA    | 0 |
| 59_k141_110997                                | 3617  | No | NA | 0 | 0 | Not-determined | Genome-fragment | NA    | 0 |
| 59_k141_74703                                 | 4620  | No | NA | 0 | 2 | Not-determined | Genome-fragment | NA    | 0 |
| 59_k141_127136                                | 1313  | No | NA | 0 | 1 | Not-determined | Genome-fragment | NA    | 0 |
| S12_k141_155025                               | 1072  | No | NA | 0 | 0 | Low-quality    | Genome-fragment | 0.78  | 0 |
| 59_k141_42663                                 | 2212  | No | NA | 0 | 2 | Not-determined | Genome-fragment | NA    | 0 |
| 59_k141_47550                                 | 1760  | No | NA | 0 | 0 | Not-determined | Genome-fragment | NA    | 0 |
| 59_k141_127559                                | 1244  | No | NA | 0 | 2 | Not-determined | Genome-fragment | NA    | 0 |
| 59_k141_127565                                | 1200  | No | NA | 0 | 0 | Not-determined | Genome-fragment | NA    | 0 |
| S2-final-viral-combined_k141_105778 [H2gene]  | 1072  | No | NA | 1 | 0 | Low-quality    | Genome-fragment | 1.79  | 0 |
| S2_k141_135760                                | 1072  | No | NA | 0 | 0 | Low-quality    | Genome-fragment | 1.05  | 0 |
| 59_k141_42707                                 | 6015  | No | NA | 0 | 1 | Not-determined | Genome-fragment | NA    | 0 |
| 59_k141_47603                                 | 1343  | No | NA | 0 | 0 | Not-determined | Genome-fragment | NA    | 0 |
| 59_k141_127425                                | 1425  | No | NA | 0 | 0 | Not-determined | Genome-fragment | NA    | 0 |
| S4-final-viral-combined_k141_83897 [full]     | 1072  | No | NA | 2 | 0 | Low-quality    | Genome-fragment | 2.97  | 0 |
| 59_k141_31844                                 | 1111  | No | NA | 0 | 1 | Not-determined | Genome-fragment | NA    | 0 |
| 59_k141_96224                                 | 1264  | No | NA | 0 | 1 | Not-determined | Genome-fragment | NA    | 0 |
| 54_k141_137455                                | 1072  | No | NA | 0 | 1 | Low-quality    | Genome-fragment | 0.65  | 0 |
| 59_k141_32004                                 | 2893  | No | NA | 0 | 2 | Not-determined | Genome-fragment | NA    | 0 |
| 59_k141_32026                                 | 5039  | No | NA | 0 | 9 | Not-determined | Genome-fragment | NA    | 0 |
| 59_k141_111192                                | 1061  | No | NA | 0 | 1 | Not-determined | Genome-fragment | NA    | 0 |
| 56_k141_28189                                 | 1072  | No | NA | 0 | 0 | Low-quality    | Genome-fragment | 2.13  | 0 |
| 59_k141_127892                                | 1043  | No | NA | 0 | 1 | Not-determined | Genome-fragment | NA    | 0 |
| 59_k141_111207                                | 1211  | No | NA | 0 | 0 | Not-determined | Genome-fragment | NA    | 0 |
| S8-final-viral-combined_k141_54946 [full]     | 1072  | No | NA | 1 | 0 | Low-quality    | Genome-fragment | 2.68  | 0 |
| 59_k141_111237                                | 3424  | No | NA | 0 | 1 | Not-determined | Genome-fragment | NA    | 0 |
| 59_k141_47867                                 | 11339 | No | NA | 0 | 0 | Not-determined | Genome-fragment | NA    | 0 |
| 59_k141_47937                                 | 1795  | No | NA | 0 | 0 | Not-determined | Genome-fragment | NA    | 0 |
| 59_k141_111454                                | 1096  | No | NA | 0 | 1 | Not-determined | Genome-fragment | NA    | 0 |
| 59_k141_111488                                | 2167  | No | NA | 0 | 1 | Not-determined | Genome-fragment | NA    | 0 |
| 59_k141_111537                                | 1522  | No | NA | 0 | 0 | Not-determined | Genome-fragment | NA    | 0 |
| 59_k141_111575                                | 1254  | No | NA | 0 | 1 | Not-determined | Genome-fragment | NA    | 0 |
| S11-final-viral-combined_k141_318520 [full]   | 1073  | No | NA | 0 | 1 | Low-quality    | Genome-fragment | 0.33  | 0 |
| 59_k141_48112                                 | 2968  | No | NA | 0 | 0 | Not-determined | Genome-fragment | NA    | 0 |
| 59_k141_128151                                | 1116  | No | NA | 0 | 1 | Not-determined | Genome-fragment | NA    | 0 |
| 59_k141_128198                                | 1195  | No | NA | 0 | 0 | Not-determined | Genome-fragment | NA    | 0 |
| 59_k141_128211                                | 1203  | No | NA | 0 | 2 | Not-determined | Genome-fragment | NA    | 0 |
| 59_k141_128232                                | 5983  | No | NA | 3 | 0 | Complete       | Genome-fragment | 100   | 0 |
| 59_k141_128248                                | 3515  | No | NA | 0 | 2 | Not-determined | Genome-fragment | NA    | 0 |
| S11-final-viral-combined_k141_130664 [full]   | 1073  | No | NA | 0 | 0 | Low-quality    | Genome-fragment | 1.09  | 0 |
| S11-final-viral-combined_k141_204620 [H2gene] | 1073  | No | NA | 0 | 0 | Low-quality    | Genome-fragment | 2.35  | 0 |
| S1-final-viral-combined_k141_233149 [full]    | 1073  | No | NA | 0 | 2 | Low-quality    | Genome-fragment | 0.95  | 0 |
| 59_k141_111769                                | 1014  | No | NA | 0 | 1 | Not-determined | Genome-fragment | NA    | 0 |
| 59_k141_111947                                | 1718  | No | NA | 0 | 2 | Not-determined | Genome-fragment | NA    | 0 |
| S1-final-viral-combined_k141_13762 [H2gene]   | 1073  | No | NA | 1 | 0 | Low-quality    | Genome-fragment | 1.51  | 0 |
| 59_k141_112192                                | 1043  | No | NA | 0 | 0 | Not-determined | Genome-fragment | NA    | 0 |
| 59_k141_112196                                | 1611  | No | NA | 0 | 1 | Not-determined | Genome-fragment | NA    | 0 |
| 59_k141_112201                                | 4184  | No | NA | 0 | 4 | Not-determined | Genome-fragment | NA    | 0 |
| S1_k141_133010                                | 1073  | No | NA | 2 | 0 | Low-quality    | Genome-fragment | 9.98  | 0 |
| S11-final-viral-combined_k141_190241 [full]   | 1349  | No | NA | 0 | 0 | Not-determined | Genome-fragment | NA    | 0 |
| S1_k141_122264                                | 1073  | No | NA | 0 | 0 | Low-quality    | Genome-fragment | 0.61  | 0 |
| S17-final-viral-combined_k141_193187 [full]   | 1073  | No | NA | 0 | 1 | Low-quality    | Genome-fragment | 0.64  | 0 |
| S11-final-viral-combined_k141_179156 [full]   | 1688  | No | NA | 0 | 2 | Not-determined | Genome-fragment | NA    | 0 |
| S11-final-viral-combined_k141_155135 [full]   | 1888  | No | NA | 0 | 0 | Not-determined | Genome-fragment | NA    | 0 |
| S11-final-viral-combined_k141_196474 [full]   | 2250  | No | NA | 0 | 0 | Not-determined | Genome-fragment | NA    | 0 |
| S11-final-viral-combined_k141_137838 [full]   | 1703  | No | NA | 0 | 0 | Not-determined | Genome-fragment | NA    | 0 |
| S17-final-viral-combined_k141_71414 [full]    | 1073  | No | NA | 0 | 1 | Low-quality    | Genome-fragment | 1.46  | 0 |
| S11-final-viral-combined_k141_110257 [full]   | 1844  | No | NA | 0 | 2 | Not-determined | Genome-fragment | NA    | 0 |
| S11-final-viral-combined_k141_27578 [full]    | 1291  | No | NA | 0 | 0 | Not-determined | Genome-fragment | NA    | 0 |
| S17-k141_98347                                | 1073  | No | NA | 0 | 0 | Low-quality    | Genome-fragment | 1.27  | 0 |
| S11-final-viral-combined_k141_206749 [full]   | 1071  | No | NA | 0 | 0 | Not-determined | Genome-fragment | NA    | 0 |
| S11-final-viral-combined_k141_117215 [full]   | 1073  | No | NA | 0 | 0 | Low-quality    | Genome-fragment | 2.47  | 0 |
| S6-final-viral-combined_k141_19288 [full]     | 1139  | No | NA | 0 | 0 | Not-determined | Genome-fragment | NA    |   |



|                                      |          |       |     |       |    |    |                |                 |    |       |       |
|--------------------------------------|----------|-------|-----|-------|----|----|----------------|-----------------|----|-------|-------|
| S11-final-viral-combined_k141_289537 | [full]   | 1272  | No  | NA    | 0  | 1  | Not-determined | Genome-fragment | NA |       | 0     |
| S11-final-viral-combined_k141_29276  | [full]   | 1075  | No  | NA    | 0  | 0  | Low-quality    | Genome-fragment | NA | 1.31  | 0     |
| S11-final-viral-combined_k141_206880 | [full]   | 3453  | No  | NA    | 0  | 0  | Not-determined | Genome-fragment | NA |       | 0     |
| S11-final-viral-combined_k141_357319 | [full]   | 1075  | No  | NA    | 0  | 0  | Low-quality    | Genome-fragment | NA | 2.22  | 0     |
| S11-final-viral-combined_k141_63334  | [H2gene] | 1075  | No  | NA    | 1  | 0  | Low-quality    | Genome-fragment | NA | 2.27  | 0     |
| S1_k141_290381                       |          | 1075  | No  | NA    | 0  | 0  | Low-quality    | Genome-fragment | NA | 0.42  | 0     |
| S11-final-viral-combined_k141_69075  | [full]   | 1749  | No  | NA    | 0  | 0  | Not-determined | Genome-fragment | NA |       | 0     |
| S2_k141_100007                       |          | 1075  | No  | NA    | 1  | 0  | Low-quality    | Genome-fragment | NA | 0.49  | 0     |
| S5-final-viral-combined_k141_46073   | [full]   | 1075  | No  | NA    | 1  | 0  | Low-quality    | Genome-fragment | NA | 2.49  | 0     |
| S17-final-viral-combined_k141_55739  | [full]   | 1075  | No  | NA    | 0  | 0  | Low-quality    | Genome-fragment | NA | 0.64  | 0     |
| S17-k141_13701                       |          | 1075  | No  | NA    | 0  | 0  | Low-quality    | Genome-fragment | NA | 0.81  | 0     |
| S17-k141_58378                       |          | 1075  | No  | NA    | 0  | 2  | Low-quality    | Genome-fragment | NA | 0.74  | 0     |
| S11-final-viral-combined_k141_234385 | [full]   | 3633  | No  | NA    | 0  | 0  | Not-determined | Genome-fragment | NA |       | 0     |
| S11-final-viral-combined_k141_165609 | [full]   | 2474  | No  | NA    | 0  | 0  | Not-determined | Genome-fragment | NA |       | 0     |
| S12-final-viral-combined_k141_126693 | [H2gene] | 1075  | No  | NA    | 2  | 0  | Low-quality    | Genome-fragment | NA | 3.11  | 0     |
| S12_k141_381496                      |          | 1075  | No  | NA    | 0  | 0  | Low-quality    | Genome-fragment | NA | 2.08  | 0     |
| S2-final-viral-combined_k141_84787   | [full]   | 1075  | No  | NA    | 0  | 0  | Low-quality    | Genome-fragment | NA | 1.83  | 0     |
| S2-final-viral-combined_k141_107030  | [full]   | 1075  | No  | NA    | 0  | 0  | Low-quality    | Genome-fragment | NA | 1.58  | 0     |
| S11-final-viral-combined_k141_155854 | [full]   | 2466  | No  | NA    | 0  | 3  | Not-determined | Genome-fragment | NA |       | 0     |
| S11-final-viral-combined_k141_165646 | [full]   | 1294  | No  | NA    | 0  | 1  | Not-determined | Genome-fragment | NA |       | 0     |
| S2-final-viral-combined_k141_89832   | [H2gene] | 1075  | No  | NA    | 1  | 0  | Low-quality    | Genome-fragment | NA | 2.55  | 0     |
| S11-final-viral-combined_k141_193148 | [full]   | 39231 | Yes | 30175 | 5  | 4  | Medium-quality | Genome-fragment | NA | 67.75 | 23.08 |
| S2_k141_42050                        |          | 1075  | No  | NA    | 1  | 0  | Low-quality    | Genome-fragment | NA | 1.61  | 0     |
| S11-final-viral-combined_k141_124324 | [full]   | 3304  | No  | NA    | 0  | 4  | Not-determined | Genome-fragment | NA |       | 0     |
| S8-final-viral-combined_k141_96731   | [full]   | 1075  | No  | NA    | 0  | 0  | Low-quality    | Genome-fragment | NA | 1.59  | 0     |
| S9_k141_907                          |          | 1076  | No  | NA    | 1  | 0  | Low-quality    | Genome-fragment | NA | 11.43 | 0     |
| S11-final-viral-combined_k141_324496 | [full]   | 1076  | No  | NA    | 0  | 0  | Low-quality    | Genome-fragment | NA | 2.69  | 0     |
| S11-final-viral-combined_k141_234426 | [full]   | 13340 | No  | NA    | 0  | 9  | Not-determined | Genome-fragment | NA |       | 0     |
| S1-final-viral-combined_k141_365098  | [full]   | 1076  | No  | NA    | 0  | 0  | Low-quality    | Genome-fragment | NA | 0.69  | 0     |
| S11-final-viral-combined_k141_69182  | [full]   | 1057  | No  | NA    | 0  | 1  | Not-determined | Genome-fragment | NA |       | 0     |
| S11-final-viral-combined_k141_124393 | [full]   | 2429  | No  | NA    | 0  | 0  | Not-determined | Genome-fragment | NA |       | 0     |
| S1-final-viral-combined_k141_285406  | [full]   | 1076  | No  | NA    | 0  | 0  | Low-quality    | Genome-fragment | NA | 0.85  | 0     |
| S11-final-viral-combined_k141_220808 | [full]   | 7884  | No  | NA    | 0  | 0  | Not-determined | Genome-fragment | NA |       | 0     |
| S3-final-viral-combined_k141_116328  | [full]   | 1076  | No  | NA    | 1  | 0  | Low-quality    | Genome-fragment | NA | 1.78  | 0     |
| S11-final-viral-combined_k141_138099 | [full]   | 1288  | No  | NA    | 0  | 1  | Not-determined | Genome-fragment | NA |       | 0     |
| S5-final-viral-combined_k141_172604  | [full]   | 1076  | No  | NA    | 0  | 0  | Low-quality    | Genome-fragment | NA | 2.36  | 0     |
| S11-final-viral-combined_k141_14092  | [full]   | 2575  | No  | NA    | 0  | 0  | Not-determined | Genome-fragment | NA |       | 0     |
| S11-final-viral-combined_k141_165709 | [full]   | 2871  | No  | NA    | 0  | 0  | Not-determined | Genome-fragment | NA |       | 0     |
| S7-final-viral-combined_k141_400718  | [full]   | 1076  | No  | NA    | 0  | 0  | Low-quality    | Genome-fragment | NA | 0.88  | 0     |
| S11-final-viral-combined_k141_207007 | [full]   | 52392 | No  | NA    | 1  | 23 | Not-determined | Genome-fragment | NA |       | 0     |
| S7_k141_143163                       |          | 1076  | No  | NA    | 2  | 0  | Low-quality    | Genome-fragment | NA | 2.23  | 0     |
| S11-final-viral-combined_k141_96692  | [full]   | 2102  | No  | NA    | 0  | 2  | Not-determined | Genome-fragment | NA |       | 0     |
| S11-final-viral-combined_k141_262077 | [full]   | 1984  | No  | NA    | 0  | 0  | Not-determined | Genome-fragment | NA |       | 0     |
| S11-final-viral-combined_k141_110485 | [full]   | 2196  | No  | NA    | 0  | 2  | Not-determined | Genome-fragment | NA |       | 0     |
| S11-final-viral-combined_k141_55409  | [full]   | 1926  | No  | NA    | 0  | 2  | Not-determined | Genome-fragment | NA |       | 0     |
| S17-final-viral-combined_k141_104028 | [full]   | 1076  | No  | NA    | 0  | 0  | Low-quality    | Genome-fragment | NA | 1.42  | 0     |
| S17-final-viral-combined_k141_104099 | [full]   | 1076  | No  | NA    | 1  | 0  | Low-quality    | Genome-fragment | NA | 1.94  | 0     |
| S11-final-viral-combined_k141_289605 | [full]   | 1941  | No  | NA    | 0  | 3  | Not-determined | Genome-fragment | NA |       | 0     |
| S11-final-viral-combined_k141_415101 | [full]   | 6143  | No  | NA    | 0  | 6  | Not-determined | Genome-fragment | NA |       | 0     |
| S12-final-viral-combined_k141_66048  | [full]   | 1076  | No  | NA    | 2  | 0  | Low-quality    | Genome-fragment | NA | 1.72  | 0     |
| S12-final-viral-combined_k141_248145 | [H2gene] | 1076  | No  | NA    | 1  | 0  | Low-quality    | Genome-fragment | NA | 1.84  | 0     |
| S11-final-viral-combined_k141_230845 | [full]   | 1989  | No  | NA    | 0  | 1  | Not-determined | Genome-fragment | NA |       | 0     |
| S11-final-viral-combined_k141_69207  | [full]   | 8496  | No  | NA    | 0  | 6  | Not-determined | Genome-fragment | NA |       | 0     |
| S2-final-viral-combined_k141_211951  | [H2gene] | 1076  | No  | NA    | 1  | 0  | Low-quality    | Genome-fragment | NA | 0.58  | 0     |
| S2_k141_64120                        |          | 1076  | No  | NA    | 0  | 0  | Low-quality    | Genome-fragment | NA | 1.48  | 0     |
| S11-final-viral-combined_k141_165785 | [full]   | 1869  | No  | NA    | 0  | 0  | Not-determined | Genome-fragment | NA |       | 0     |
| S4-final-viral-combined_k141_111719  | [full]   | 1076  | No  | NA    | 0  | 0  | Low-quality    | Genome-fragment | NA | 2.05  | 0     |
| S11-final-viral-combined_k141_96737  | [full]   | 2752  | No  | NA    | 0  | 1  | Not-determined | Genome-fragment | NA |       | 0     |
| S11-final-viral-combined_k141_124446 | [full]   | 4203  | No  | NA    | 0  | 3  | Not-determined | Genome-fragment | NA |       | 0     |
| S8-final-viral-combined_k141_258279  | [full]   | 1076  | No  | NA    | 1  | 0  | Low-quality    | Genome-fragment | NA | 1.65  | 0     |
| S11-final-viral-combined_k141_193271 | [full]   | 2104  | No  | NA    | 0  | 2  | Not-determined | Genome-fragment | NA | 2.37  | 0     |
| S11_k141_319123                      |          | 1077  | No  | NA    | 0  | 0  | Low-quality    | Genome-fragment | NA |       | 0     |
| S11_k141_119984                      |          | 1077  | No  | NA    | 0  | 1  | Low-quality    | Genome-fragment | NA | 2.13  | 0     |
| S1_k141_64782                        |          | 1077  | No  | NA    | 1  | 0  | Low-quality    | Genome-fragment | NA | 0.28  | 0     |
| S17-final-viral-combined_k141_201062 | [full]   | 1077  | No  | NA    | 0  | 0  | Low-quality    | Genome-fragment | NA | 3.05  | 0     |
| S11-final-viral-combined_k141_303534 | [full]   | 2821  | No  | NA    | 0  | 9  | Not-determined | Genome-fragment | NA |       | 0     |
| S17-k141_200767                      |          | 1077  | No  | NA    | 0  | 0  | Low-quality    | Genome-fragment | NA | 1.67  | 0     |
| S11-final-viral-combined_k141_151974 | [full]   | 6276  | No  | NA    | 0  | 1  | Not-determined | Genome-fragment | NA |       | 0     |
| S12_k141_361606                      |          | 1077  | No  | NA    | 0  | 1  | Low-quality    | Genome-fragment | NA | 2.47  | 0     |
| S11-final-viral-combined_k141_248401 | [full]   | 1839  | No  | NA    | 0  | 1  | Not-determined | Genome-fragment | NA |       | 0     |
| S2-final-viral-combined_k141_127089  | [full]   | 1077  | No  | NA    | 0  | 0  | Low-quality    | Genome-fragment | NA | 0.66  | 0     |
| S2-final-viral-combined_k141_993211  | [full]   | 1077  | No  | NA    | 0  | 2  | Low-quality    | Genome-fragment | NA | 1.44  | 0     |
| S2-final-viral-combined_k141_193804  | [full]   | 1077  | No  | NA    | 0  | 1  | Low-quality    | Genome-fragment | NA | 2.47  | 0     |
| S11-final-viral-combined_k141_110566 | [full]   | 1929  | No  | NA    | 0  | 1  | Not-determined | Genome-fragment | NA |       | 0     |
| S11-final-viral-combined_k141_138101 | [full]   | 2105  | No  | NA    | 0  | 2  | Not-determined | Genome-fragment | NA |       | 0     |
| S2-final-viral-combined_k141_112723  | [full]   | 1077  | No  | NA    | 3  | 0  | Low-quality    | Genome-fragment | NA | 1.97  | 0     |
| S11-final-viral-combined_k141_152012 | [full]   | 1485  | No  | NA    | 0  | 1  | Not-determined | Genome-fragment | NA |       | 0     |
| S11-final-viral-combined_k141_83070  | [full]   | 3223  | No  | NA    | 0  | 1  | Not-determined | Genome-fragment | NA |       | 0     |
| S6-final-viral-combined_k141_119045  | [full]   | 1077  | No  | NA    | 0  | 1  | Low-quality    | Genome-fragment | NA | 0.51  | 0     |
| S6-final-viral-combined_k141_3121    | [full]   | 1077  | No  | NA    | 0  | 0  | Low-quality    | Genome-fragment | NA | 2.14  | 0     |
| S11-final-viral-combined_k141_124507 | [full]   | 5044  | No  | NA    | 0  | 1  | Not-determined | Genome-fragment | NA |       | 0     |
| S11-final-viral-combined_k141_150306 | [full]   | 3174  | No  | NA    | 0  | 0  | Not-determined | Genome-fragment | NA |       | 0     |
| S11-final-viral-combined_k141_289712 | [full]   | 18580 | No  | NA    | 0  | 11 | Not-determined | Genome-fragment | NA |       | 0     |
| S8-final-viral-combined_k141_187774  | [full]   | 1077  | No  | NA    | 0  | 0  | Low-quality    | Genome-fragment | NA | 0.66  | 0     |
| S11-final-viral-combined_k141_167066 | [full]   | 1150  | No  | NA    | 0  | 0  | Not-determined | Genome-fragment | NA |       | 0     |
| S8-final-viral-combined_k141_155984  | [full]   | 1077  | No  | NA    | 0  | 0  | Low-quality    | Genome-fragment | NA | 0.7   | 0     |
| S8_k141_79854                        |          | 1077  | No  | NA    | 0  | 0  | Low-quality    | Genome-fragment | NA | 0.86  | 0     |
| S11_k141_319543                      |          | 1078  | No  | NA    | 2  | 0  | Low-quality    | Genome-fragment | NA | 2.94  | 0     |
| S11_k141_6006                        |          | 1078  | No  | NA    | 1  | 0  | Low-quality    | Genome-fragment | NA | 0.57  | 0     |
| S11-final-viral-combined_k141_142958 | [full]   | 1078  | No  | NA    | 0  | 0  | Low-quality    | Genome-fragment | NA |       | 0     |
| S11-final-viral-combined_k141_28013  | [full]   | 1332  | No  | NA    | 0  | 0  | Not-determined | Genome-fragment | NA |       | 0     |
| S11-final-viral-combined_k141_142161 | [full]   | 1946  | No  | NA    | 0  | 1  | Not-determined | Genome-fragment | NA |       | 0     |
| S11-final-viral-combined_k141_289730 | [full]   | 1482  | No  | NA    | 0  | 0  | Not-determined | Genome-fragment | NA |       | 0     |
| S11-final-viral-combined_k141_138299 | [full]   | 2429  | No  | NA    | 0  | 3  | Not-determined | Genome-fragment | NA |       | 0     |
| S11-final-viral-combined_k141_416169 | [full]   | 1428  | No  | NA    | 0  | 1  | Not-determined | Genome-fragment | NA |       | 0     |
| S11-final-viral-combined_k141_289732 | [full]   | 1308  | No  | NA    | 0  | 1  | Not-determined | Genome-fragment | NA |       | 0     |
| S5-final-viral-combined_k141_89346   | [full]   | 1078  | No  | NA    | 2  | 0  | Low-quality    | Genome-fragment | NA | 2.31  | 0     |
| S5_k141_183108                       |          | 1078  | No  | NA    | 0  | 0  | Low-quality    | Genome-fragment | NA | 2.66  | 0     |
| S7-final-viral-combined_k141_157900  | [full]   | 1078  | No  | NA    | 0  | 0  | Low-quality    | Genome-fragment | NA | 1.83  | 0     |
| S11-final-viral-combined_k141_110636 | [full]   | 2419  | No  | NA    | 0  | 1  | Not-determined | Genome-fragment | NA |       | 0     |
| S11-final-viral-combined_k141_69335  | [full]   | 2329  | No  | NA    | 0  | 1  | Not-determined | Genome-fragment | NA |       | 0     |
| S11-final-viral-combined_k141_83107  | [full]   | 1314  | No  | NA    | 0  | 0  | Not-determined | Genome-fragment | NA |       | 0     |
| S11-final-viral-combined_k141_69337  | [full]   | 1968  | No  | NA    | 0  | 2  | Not-determined | Genome-fragment | NA |       | 0     |
| S7-final-viral-combined_k141_279561  | [full]   | 1078  | No  | NA    | 0  | 0  | Low-quality    | Genome-fragment | NA | 0.72  | 0     |
| S11-final-viral-combined_k141_141181 | [full]   | 1999  | No  | NA    | 0  | 1  | Not-determined | Genome-fragment | NA |       | 0     |
| S11-final-viral-combined_k141_303682 | [full]   | 5729  | No  | NA    | 0  | 3  | Not-determined | Genome-fragment | NA |       | 0     |
| S11-final-viral-combined_k141_69357  | [full]   | 5297  | No  | NA    | 0  | 1  | Not-determined | Genome-fragment | NA |       | 0     |
| S11-final-viral-combined_k141_220937 | [full]   | 2503  | No  | NA    | 0  | 1  | Not-determined | Genome-fragment | NA |       | 0     |
| S11-final-viral-combined_k141_83135  | [full]   | 2540  | No  | NA    | 0  | 1  | Not-determined | Genome-fragment | NA |       | 0     |
| S11-final-viral-combined_k141_69376  | [full]   | 1833  | No  | NA    | 0  | 1  | Not-determined | Genome-fragment | NA |       | 0     |
| S11-final-viral-combined_k141_248565 | [full]   | 5089  | No  | NA    | 0  | 3  | Not-determined | Genome-fragment | NA |       | 0     |
| S11-final-viral-combined_k141_276066 | [full]   | 2238  | No  | NA    | 0  | 1  | Not-determined | Genome-fragment | NA |       | 0     |
| S11-final-viral-combined_k141_96991  | [full]   | 1429  | No  | NA    | 0  | 2  | Not-determined | Genome-fragment | NA |       | 0     |
| S11-final-viral-combined_k141_179605 | [full]   | 43615 | Yes | 22617 | 12 | 17 | Medium-quality | Genome-fragment | NA | 54    | 48.14 |
| S7_k141_20563                        |          | 1078  | No  | NA    | 0  | 0  | Low-quality    | Genome-fragment | NA | 1.8   | 0     |
| S11-final-viral-combined_k141_14365  | [full]   | 2206  | No  | NA    | 0  | 2  | Not-determined | Genome-fragment | NA |       | 0     |
| S11-final-viral-combined_k141_234757 | [full]   | 3517  | No  | NA    | 0  | 1  | Not-determined | Genome-fragment | NA |       | 0     |
| S17-final-viral-combined_k141_138873 | [full]   | 1078  | No  | NA    | 2  | 0  | Low-quality    | Genome-fragment | NA | 3.16  | 0     |
| S17-final-viral-combined_k141_234790 | [full]   | 1037  | No  | NA    | 0  | 1  | Not-determined | Genome-fragment | NA |       | 0     |
| S17-final-viral-combined_k141_141231 | [full]   | 1078  | No  | NA    | 0  | 0  | Low-quality    | Genome-fragment | NA | 2.88  | 0     |
| S11-final-viral-combined_k141_152167 | [full]   | 1048  | No  | NA    | 0  | 2  | Not-determined | Genome-fragment | NA |       | 0     |
| S11-final-viral-combined_k141_281041 | [full]   | 1684  | No  | NA    | 0  | 2  | Not-determined | Genome-fragment | NA |       | 0     |
| S11-final-viral-combined_k141_193408 | [full]   | 27118 | No  | NA    | 0  | 21 | Not-determined | Genome-fragment | NA |       | 0     |
| S11-final-viral-combined_k           |          |       |     |       |    |    |                |                 |    |       |       |



|                                       |          |       |     |       |    |    |                |                 |       |       |
|---------------------------------------|----------|-------|-----|-------|----|----|----------------|-----------------|-------|-------|
| S5-final-viral-combined_k141_3580     | [full]   | 1080  | No  | NA    | 0  | 0  | Low-quality    | Genome-fragment | 2.12  | 0     |
| S5-final-viral-combined_k141_35080    | [full]   | 1080  | No  | NA    | 2  | 0  | Not-determined | Genome-fragment | 2.38  | 0     |
| S11-final-viral-combined_k141_35239   | [full]   | 7421  | No  | NA    | 0  | 0  | Not-determined | Genome-fragment | NA    | 0     |
| S5-final-viral-combined_k141_21801    | [full]   | 1080  | No  | NA    | 0  | 0  | Low-quality    | Genome-fragment | 1.86  | 0     |
| S17-final-viral-combined_k141_47928   | [full]   | 1080  | No  | NA    | 0  | 0  | Low-quality    | Genome-fragment | 2.8   | 0     |
| S11-final-viral-combined_k141_32493   | [full]   | 2484  | No  | NA    | 0  | 0  | Not-determined | Genome-fragment | NA    | 0     |
| S11-final-viral-combined_k141_28116   | [full]   | 2324  | No  | NA    | 0  | 0  | Not-determined | Genome-fragment | NA    | 0     |
| S17-final-viral-combined_k141_26564   | [H2gene] | 1080  | No  | NA    | 1  | 0  | Low-quality    | Genome-fragment | 1.66  | 0     |
| S11-final-viral-combined_k141_35256   | [full]   | 3180  | No  | NA    | 0  | 0  | Not-determined | Genome-fragment | NA    | 0     |
| S2-final-viral-combined_k141_40394    | [full]   | 1080  | No  | NA    | 0  | 0  | Low-quality    | Genome-fragment | 2.05  | 0     |
| S11-final-viral-combined_k141_276341  | [full]   | 2914  | No  | NA    | 0  | 0  | Not-determined | Genome-fragment | NA    | 0     |
| S11-final-viral-combined_k141_28513   | [full]   | 6207  | No  | NA    | 0  | 0  | Not-determined | Genome-fragment | NA    | 0     |
| S11-final-viral-combined_k141_2251231 | [full]   | 2137  | No  | NA    | 0  | 0  | Not-determined | Genome-fragment | NA    | 0     |
| S11-final-viral-combined_k141_276342  | [full]   | 1349  | No  | NA    | 0  | 1  | Not-determined | Genome-fragment | NA    | 0     |
| S11-final-viral-combined_k141_6781    | [full]   | 7158  | No  | NA    | 0  | 2  | Not-determined | Genome-fragment | NA    | 0     |
| S11-final-viral-combined_k141_353702  | [full]   | 3304  | No  | NA    | 0  | 0  | Not-determined | Genome-fragment | NA    | 0     |
| S4-final-viral-combined_k141_10744    | [full]   | 1080  | No  | NA    | 1  | 0  | Low-quality    | Genome-fragment | 1.31  | 0     |
| S11-final-viral-combined_k141_303944  | [full]   | 1673  | No  | NA    | 0  | 1  | Not-determined | Genome-fragment | NA    | 0     |
| S8-final-viral-combined_k141_266458   | [full]   | 1080  | No  | NA    | 1  | 0  | Low-quality    | Genome-fragment | 0.82  | 0     |
| S11-final-viral-combined_k141_97292   | [full]   | 2922  | No  | NA    | 0  | 1  | Not-determined | Genome-fragment | NA    | 0     |
| S8-final-viral-combined_k141_245828   | [full]   | 1080  | No  | NA    | 1  | 0  | Low-quality    | Genome-fragment | 1.95  | 0     |
| S8_k141_35867                         |          | 1080  | No  | NA    | 0  | 0  | Low-quality    | Genome-fragment | 2.45  | 0     |
| S9-final-viral-combined_k141_8864     | [H2gene] | 1081  | No  | NA    | 1  | 0  | Low-quality    | Genome-fragment | 2.81  | 0     |
| S11-final-viral-combined_k141_235142  | [full]   | 2992  | No  | NA    | 0  | 2  | Not-determined | Genome-fragment | NA    | 0     |
| S11-final-viral-combined_k141_297628  | [H2gene] | 1081  | No  | NA    | 1  | 0  | Low-quality    | Genome-fragment | 2.47  | 0     |
| S11-final-viral-combined_k141_355821  | [full]   | 1856  | No  | NA    | 0  | 0  | Not-determined | Genome-fragment | NA    | 0     |
| S1_k141_169781                        |          | 1081  | No  | NA    | 0  | 1  | Low-quality    | Genome-fragment | 2.77  | 0     |
| S5-final-viral-combined_k141_122425   | [H2gene] | 1081  | No  | NA    | 2  | 0  | Low-quality    | Genome-fragment | 2.41  | 0     |
| S11-final-viral-combined_k141_235143  | [full]   | 1539  | No  | NA    | 0  | 1  | Not-determined | Genome-fragment | NA    | 0     |
| S11-final-viral-combined_k141_166423  | [full]   | 1429  | No  | NA    | 0  | 1  | Not-determined | Genome-fragment | NA    | 0     |
| S11-final-viral-combined_k141_221310  | [full]   | 1763  | No  | NA    | 0  | 1  | Not-determined | Genome-fragment | NA    | 0     |
| S17-final-viral-combined_k141_110981  | [full]   | 1081  | No  | NA    | 0  | 0  | Low-quality    | Genome-fragment | 2.71  | 0     |
| S17-final-viral-combined_k141_206409  | [full]   | 1081  | No  | NA    | 0  | 0  | Low-quality    | Genome-fragment | 0.93  | 0     |
| S17_k141_121614                       |          | 1081  | No  | NA    | 2  | 0  | Low-quality    | Genome-fragment | 2.91  | 0     |
| S11-final-viral-combined_k141_207506  | [full]   | 1835  | No  | NA    | 0  | 2  | Not-determined | Genome-fragment | NA    | 0     |
| S12-final-viral-combined_k141_152557  | [full]   | 1081  | No  | NA    | 0  | 0  | Low-quality    | Genome-fragment | 0.86  | 0     |
| S11-final-viral-combined_k141_281971  | [full]   | 1114  | No  | NA    | 0  | 0  | Not-determined | Genome-fragment | NA    | 0     |
| S11-final-viral-combined_k141_221310  | [full]   | 23507 | No  | NA    | 11 | 1  | High-quality   | High-quality    | 91.28 | 0     |
| S11-final-viral-combined_k141_317802  | [full]   | 1124  | No  | NA    | 0  | 1  | Not-determined | Genome-fragment | NA    | 0     |
| S12-final-viral-combined_k141_147122  | [full]   | 1081  | No  | NA    | 0  | 0  | Low-quality    | Genome-fragment | 2.27  | 0     |
| S11-final-viral-combined_k141_235212  | [full]   | 2812  | No  | NA    | 0  | 2  | Not-determined | Genome-fragment | NA    | 0     |
| S11-final-viral-combined_k141_317806  | [full]   | 3456  | No  | NA    | 0  | 2  | Not-determined | Genome-fragment | NA    | 0     |
| S11-final-viral-combined_k141_276481  | [full]   | 1948  | No  | NA    | 0  | 2  | Not-determined | Genome-fragment | NA    | 0     |
| S2-final-viral-combined_k141_85560    | [full]   | 1081  | No  | NA    | 0  | 0  | Low-quality    | Genome-fragment | 2.6   | 0     |
| S11-final-viral-combined_k141_304041  | [full]   | 2567  | No  | NA    | 0  | 0  | Not-determined | Genome-fragment | NA    | 0     |
| S11-final-viral-combined_k141_69727   | [full]   | 1233  | No  | NA    | 0  | 0  | Not-determined | Genome-fragment | NA    | 0     |
| S11-final-viral-combined_k141_351830  | [full]   | 2039  | No  | NA    | 0  | 1  | Not-determined | Genome-fragment | NA    | 0     |
| S11-final-viral-combined_k141_83551   | [full]   | 1533  | No  | NA    | 0  | 0  | Not-determined | Genome-fragment | NA    | 0     |
| S11-final-viral-combined_k141_221357  | [full]   | 1644  | No  | NA    | 0  | 1  | Not-determined | Genome-fragment | NA    | 0     |
| S11-final-viral-combined_k141_16647   | [full]   | 5569  | No  | NA    | 0  | 1  | Not-determined | Genome-fragment | NA    | 0     |
| S11-final-viral-combined_k141_14636   | [full]   | 35938 | No  | NA    | 20 | 0  | High-quality   | High-quality    | 92.99 | 0     |
| S11-final-viral-combined_k141_304023  | [full]   | 2158  | No  | NA    | 0  | 1  | Not-determined | Genome-fragment | NA    | 0     |
| S2-final-viral-combined_k141_214961   | [full]   | 1081  | No  | NA    | 1  | 0  | Low-quality    | Genome-fragment | 2.54  | 0     |
| S4-final-viral-combined_k141_96024    | [full]   | 1081  | No  | NA    | 0  | 0  | Low-quality    | Genome-fragment | 0.79  | 0     |
| S6-final-viral-combined_k141_447351   | [full]   | 1081  | No  | NA    | 1  | 0  | Low-quality    | Genome-fragment | 2.25  | 0     |
| S11-final-viral-combined_k141_290135  | [full]   | 2427  | No  | NA    | 1  | 0  | Not-determined | Genome-fragment | NA    | 0     |
| S6-final-viral-combined_k141_68940    | [full]   | 1081  | No  | NA    | 1  | 0  | Low-quality    | Genome-fragment | 0.59  | 0     |
| S6-final-viral-combined_k141_137290   | [H2gene] | 1081  | No  | NA    | 1  | 0  | Low-quality    | Genome-fragment | 2.62  | 0     |
| S6-final-viral-combined_k141_121678   | [full]   | 1082  | No  | NA    | 0  | 0  | Low-quality    | Genome-fragment | 2.82  | 0     |
| S11-final-viral-combined_k141_83571   | [full]   | 40621 | Yes | 32207 | 12 | 6  | Medium-quality | Genome-fragment | 82.38 | 20.71 |
| S11-final-viral-combined_k141_14663   | [full]   | 1393  | No  | NA    | 0  | 0  | Not-determined | Genome-fragment | NA    | 0     |
| S11-final-viral-combined_k141_166490  | [full]   | 1913  | No  | NA    | 0  | 3  | Not-determined | Genome-fragment | NA    | 0     |
| S9-final-viral-combined_k141_80878    | [full]   | 1082  | No  | NA    | 0  | 0  | Low-quality    | Genome-fragment | 1.03  | 0     |
| S11-final-viral-combined_k141_125034  | [full]   | 2448  | No  | NA    | 0  | 1  | Not-determined | Genome-fragment | NA    | 0     |
| S9-final-viral-combined_k141_40161    | [full]   | 1082  | No  | NA    | 0  | 0  | Low-quality    | Genome-fragment | 2.05  | 0     |
| S9_k141_28071                         |          | 1082  | No  | NA    | 0  | 0  | Low-quality    | Genome-fragment | 0.31  | 0     |
| S11-final-viral-combined_k141_83624   | [full]   | 4525  | No  | NA    | 0  | 4  | Not-determined | Genome-fragment | NA    | 0     |
| S11-final-viral-combined_k141_189933  | [H2gene] | 1082  | No  | NA    | 1  | 0  | Low-quality    | Genome-fragment | 0.7   | 0     |
| S11-final-viral-combined_k141_304139  | [full]   | 1834  | No  | NA    | 0  | 2  | Not-determined | Genome-fragment | NA    | 0     |
| S1-final-viral-combined_k141_137761   | [full]   | 1082  | No  | NA    | 0  | 0  | Low-quality    | Genome-fragment | 2.35  | 0     |
| S1-final-viral-combined_k141_221507   | [full]   | 1082  | No  | NA    | 0  | 0  | Low-quality    | Genome-fragment | 0.81  | 0     |
| S11-final-viral-combined_k141_225133  | [full]   | 7617  | No  | NA    | 0  | 5  | Not-determined | Genome-fragment | NA    | 0     |
| S11-final-viral-combined_k141_248996  | [full]   | 4568  | No  | NA    | 0  | 3  | Not-determined | Genome-fragment | NA    | 0     |
| S11-final-viral-combined_k141_152628  | [full]   | 2165  | No  | NA    | 0  | 0  | Not-determined | Genome-fragment | NA    | 0     |
| S11-final-viral-combined_k141_977     | [full]   | 3504  | No  | NA    | 0  | 1  | Not-determined | Genome-fragment | NA    | 0     |
| S11-final-viral-combined_k141_27651   | [full]   | 1741  | No  | NA    | 0  | 0  | Not-determined | Genome-fragment | NA    | 0     |
| S1-final-viral-combined_k141_106745   | [full]   | 1082  | No  | NA    | 0  | 1  | Low-quality    | Genome-fragment | 1.09  | 0     |
| S1_k141_112514                        |          | 1082  | No  | NA    | 0  | 0  | Low-quality    | Genome-fragment | 2.11  | 0     |
| S11-final-viral-combined_k141_83703   | [full]   | 1215  | No  | NA    | 0  | 0  | Not-determined | Genome-fragment | NA    | 0     |
| S11-final-viral-combined_k141_28483   | [full]   | 6609  | No  | NA    | 0  | 0  | Not-determined | Genome-fragment | NA    | 0     |
| S7_k141_236602                        |          | 1082  | No  | NA    | 1  | 0  | Low-quality    | Genome-fragment | 1.86  | 0     |
| S11-final-viral-combined_k141_166608  | [full]   | 1533  | No  | NA    | 0  | 2  | Not-determined | Genome-fragment | NA    | 0     |
| S11-final-viral-combined_k141_207691  | [full]   | 2158  | No  | NA    | 0  | 2  | Not-determined | Genome-fragment | NA    | 0     |
| S11-final-viral-combined_k141_180040  | [full]   | 1278  | No  | NA    | 0  | 0  | Not-determined | Genome-fragment | NA    | 0     |
| S11-final-viral-combined_k141_304194  | [full]   | 3101  | No  | NA    | 0  | 0  | Not-determined | Genome-fragment | NA    | 0     |
| S11-final-viral-combined_k141_152661  | [full]   | 2272  | No  | NA    | 0  | 1  | Not-determined | Genome-fragment | NA    | 0     |
| S11-final-viral-combined_k141_152666  | [full]   | 4114  | No  | NA    | 0  | 3  | Not-determined | Genome-fragment | NA    | 0     |
| S11-final-viral-combined_k141_14777   | [full]   | 3326  | No  | NA    | 0  | 4  | Not-determined | Genome-fragment | NA    | 0     |
| S11-final-viral-combined_k141_83742   | [full]   | 1727  | No  | NA    | 0  | 2  | Not-determined | Genome-fragment | NA    | 0     |
| S11-final-viral-combined_k141_97691   | [full]   | 2449  | No  | NA    | 0  | 2  | Not-determined | Genome-fragment | NA    | 0     |
| S11-final-viral-combined_k141_180077  | [full]   | 2558  | No  | NA    | 0  | 1  | Not-determined | Genome-fragment | NA    | 0     |
| S17-final-viral-combined_k141_178340  | [full]   | 1082  | No  | NA    | 2  | 0  | Low-quality    | Genome-fragment | 2.84  | 0     |
| S17-final-viral-combined_k141_178667  | [full]   | 1082  | No  | NA    | 2  | 0  | Low-quality    | Genome-fragment | 2.54  | 0     |
| S12-final-viral-combined_k141_116436  | [full]   | 1082  | No  | NA    | 0  | 0  | Low-quality    | Genome-fragment | 2.07  | 0     |
| S11-final-viral-combined_k141_221462  | [full]   | 3657  | No  | NA    | 0  | 0  | Not-determined | Genome-fragment | NA    | 0     |
| S11-final-viral-combined_k141_290203  | [full]   | 3874  | No  | NA    | 0  | 3  | Not-determined | Genome-fragment | NA    | 0     |
| S12-final-viral-combined_k141_285014  | [H2gene] | 1082  | No  | NA    | 1  | 0  | Low-quality    | Genome-fragment | 3.04  | 0     |
| S2-final-viral-combined_k141_186749   | [full]   | 1082  | No  | NA    | 0  | 0  | Low-quality    | Genome-fragment | 2.39  | 0     |
| S8-final-viral-combined_k141_485      | [full]   | 1082  | No  | NA    | 0  | 0  | Low-quality    | Genome-fragment | 1.75  | 0     |
| S8-final-viral-combined_k141_128090   | [full]   | 1082  | No  | NA    | 0  | 0  | Low-quality    | Genome-fragment | 2.73  | 0     |
| S11-final-viral-combined_k141_180807  | [full]   | 1083  | No  | NA    | 0  | 2  | Low-quality    | Genome-fragment | 0.54  | 0     |
| S11-final-viral-combined_k141_42125   | [full]   | 2113  | No  | NA    | 0  | 3  | Not-determined | Genome-fragment | NA    | 0     |
| S11-final-viral-combined_k141_274638  | [full]   | 1891  | No  | NA    | 0  | 2  | Not-determined | Genome-fragment | NA    | 0     |
| S11-final-viral-combined_k141_167741  | [full]   | 1083  | No  | NA    | 0  | 2  | Low-quality    | Genome-fragment | 0.4   | 0     |
| S3-final-viral-combined_k141_63671    | [full]   | 1083  | No  | NA    | 1  | 0  | Low-quality    | Genome-fragment | 1.34  | 0     |
| S11-final-viral-combined_k141_125174  | [full]   | 67341 | Yes | 22887 | 3  | 12 | Medium-quality | Genome-fragment | 56.45 | 66.01 |
| S11-final-viral-combined_k141_304239  | [full]   | 44706 | No  | NA    | 17 | 0  | High-quality   | High-quality    | 99.61 | 0     |
| S11-final-viral-combined_k141_33805   | [full]   | 1108  | No  | NA    | 0  | 2  | Not-determined | Genome-fragment | NA    | 0     |
| S11-final-viral-combined_k141_36123   | [full]   | 1493  | No  | NA    | 0  | 1  | Not-determined | Genome-fragment | NA    | 0     |
| S11-final-viral-combined_k141_152773  | [full]   | 4344  | No  | NA    | 0  | 0  | Not-determined | Genome-fragment | NA    | 0     |
| S11-final-viral-combined_k141_290278  | [full]   | 1406  | No  | NA    | 0  | 1  | Not-determined | Genome-fragment | NA    | 0     |
| S1_k141_24196                         |          | 1083  | No  | NA    | 0  | 2  | Low-quality    | Genome-fragment | 0.67  | 0     |
| S5-final-viral-combined_k141_153436   | [full]   | 1083  | No  | NA    | 1  | 0  | Low-quality    | Genome-fragment | 2.46  | 0     |
| S11-final-viral-combined_k141_304274  | [full]   | 4945  | No  | NA    | 0  | 1  | Not-determined | Genome-fragment | NA    | 0     |
| S5_k141_198233                        |          | 1083  | No  | NA    | 0  | 0  | Low-quality    | Genome-fragment | 3.02  | 0     |
| S11-final-viral-combined_k141_207821  | [full]   | 2553  | No  | NA    | 0  | 1  | Not-determined | Genome-fragment | NA    | 0     |
| S11-final-viral-combined_k141_249131  | [full]   | 1946  | No  | NA    | 0  | 1  | Not-determined | Genome-fragment | NA    | 0     |
| S11-final-viral-combined_k141_193956  | [full]   | 3898  | No  | NA    | 0  | 1  | Not-determined | Genome-fragment | NA    | 0     |
| S11-final-viral-combined_k141_235594  | [full]   | 4229  | No  | NA    | 0  | 2  | Not-determined | Genome-fragment | NA    | 0     |
| S11-final-viral-combined_k141_152802  | [full]   | 1326  | No  | NA    | 0  | 0  | Not-determined | Genome-fragment | NA    | 0     |
| S11-final-viral-combined_k141_14892   | [full]   | 1933  | No  | NA    | 0  | 2  | Not-determined | Genome-fragment | NA    | 0     |
| S11-final-viral-combined_k141_221578  | [full]   | 1748  | No  | NA    | 0  | 1  | Not-determined | Genome-fragment | NA    | 0     |
| S7-final-viral-combined_k141_14868    | [full]   | 1083  | No  | NA    | 0  | 0  | Low-quality    | Genome-fragment | 2.31  | 0     |
| S11-final-viral-combined_k141_28535   | [full]   | 1398  | No  | NA    | 0  | 0  | Not-determined | Genome-fragment | NA    | 0     |
| S11-final-viral-combined_k141_193859  | [full]   | 10709 | No  | NA    | 0  | 7  | Not-determined | Genome-fragment | NA    | 0     |
| S11-final-viral-combined_k141_14951   | [full]   | 1615  | No  | NA    | 0  | 0  | Not-determined | Genome-fragment | NA    | 0     |
| S7_k141_44748                         |          | 1083  | No  | NA    | 0  | 0  | Low-quality    | Genome-fragment | 1.34  | 0     |
| S7_k141_147372                        |          | 1083  | No  | NA    | 0  | 0  | Low-quality    | Genome-fragment | 2.53  | 0     |
| S7_k141_40399                         |          | 1083  | No  | NA    | 1  | 0  | Low-quality    | Genome-fragment | 2.14  | 0     |



|                                      |          |       |     |       |    |    |                |                 |       |       |
|--------------------------------------|----------|-------|-----|-------|----|----|----------------|-----------------|-------|-------|
| S3-final-viral-combined_k141_3009    | [Full]   | 1085  | No  | NA    | 0  | 0  | Low-quality    | Genome-fragment | 0.49  | 0     |
| S11-final-viral-combined_k141_30452  | [Full]   | 1473  | No  | NA    | 1  | 1  | Not-determined | Genome-fragment | NA    | 0     |
| S17-final-viral-combined_k141_248136 | [Full]   | 1085  | No  | NA    | 1  | 0  | Low-quality    | Genome-fragment | 2.78  | 0     |
| S12-final-viral-combined_k141_311471 | [Full]   | 1085  | No  | NA    | 2  | 0  | Low-quality    | Genome-fragment | 2.95  | 0     |
| S12-final-viral-combined_k141_35213  | [Full]   | 1085  | No  | NA    | 2  | 0  | Low-quality    | Genome-fragment | 2.3   | 0     |
| S11-final-viral-combined_k141_98028  | [Full]   | 1612  | No  | NA    | 0  | 0  | Not-determined | Genome-fragment | NA    | 0     |
| S11-final-viral-combined_k141_98034  | [Full]   | 2475  | No  | NA    | 0  | 2  | Not-determined | Genome-fragment | NA    | 0     |
| S11-final-viral-combined_k141_208056 | [Full]   | 3203  | No  | NA    | 0  | 0  | Not-determined | Genome-fragment | NA    | 0     |
| S11-final-viral-combined_k141_98019  | [Full]   | 2192  | No  | NA    | 0  | 0  | Not-determined | Genome-fragment | NA    | 0     |
| S12-final-viral-combined_k141_113943 | [Full]   | 1085  | No  | NA    | 0  | 0  | Low-quality    | Genome-fragment | 1.89  | 0     |
| S2-final-viral-combined_k141_233930  | [Full]   | 1085  | No  | NA    | 0  | 0  | Low-quality    | Genome-fragment | 2.27  | 0     |
| S11-final-viral-combined_k141_15105  | [Full]   | 1995  | No  | NA    | 0  | 0  | Not-determined | Genome-fragment | NA    | 0     |
| S11-final-viral-combined_k141_180367 | [Full]   | 2786  | No  | NA    | 0  | 0  | Not-determined | Genome-fragment | NA    | 0     |
| S11-final-viral-combined_k141_263208 | [Full]   | 3620  | No  | NA    | 0  | 2  | Not-determined | Genome-fragment | NA    | 0     |
| S2-final-viral-combined_k141_202799  | [Full]   | 1085  | No  | NA    | 1  | 0  | Low-quality    | Genome-fragment | 3.04  | 0     |
| S2_k141_31574                        | [Full]   | 1085  | No  | NA    | 0  | 0  | Low-quality    | Genome-fragment | 0.1   | 0     |
| S11-final-viral-combined_k141_318116 | [Full]   | 2577  | No  | NA    | 0  | 0  | Not-determined | Genome-fragment | NA    | 0     |
| S8-final-viral-combined_k141_147097  | [Full]   | 1085  | No  | NA    | 0  | 1  | Low-quality    | Genome-fragment | 1.61  | 0     |
| S9-final-viral-combined_k141_114557  | [Full]   | 1086  | No  | NA    | 0  | 0  | Low-quality    | Genome-fragment | 0.86  | 0     |
| S1-final-viral-combined_k141_283497  | [Full]   | 1086  | No  | NA    | 2  | 0  | Low-quality    | Genome-fragment | 3.28  | 0     |
| S1_k141_68546                        | [Full]   | 1086  | No  | NA    | 0  | 1  | Low-quality    | Genome-fragment | 2.16  | 0     |
| S1_k141_244699                       | [Full]   | 1086  | No  | NA    | 0  | 0  | Low-quality    | Genome-fragment | 0.73  | 0     |
| S7-final-viral-combined_k141_216341  | [Full]   | 1086  | No  | NA    | 0  | 1  | Low-quality    | Genome-fragment | 1.82  | 0     |
| S2-final-viral-combined_k141_175796  | [Full]   | 1086  | No  | NA    | 2  | 0  | Low-quality    | Genome-fragment | 1.55  | 0     |
| S11-final-viral-combined_k141_194178 | [Full]   | 2474  | No  | NA    | 0  | 1  | Not-determined | Genome-fragment | NA    | 0     |
| S11-final-viral-combined_k141_194178 | [Full]   | 1721  | No  | NA    | 0  | 0  | Not-determined | Genome-fragment | NA    | 0     |
| S2_k141_189078                       | [Full]   | 1086  | No  | NA    | 0  | 0  | Low-quality    | Genome-fragment | 0.7   | 0     |
| S11-final-viral-combined_k141_70147  | [Full]   | 1798  | No  | NA    | 0  | 0  | Not-determined | Genome-fragment | NA    | 0     |
| S4-final-viral-combined_k141_149035  | [H2gene] | 1086  | No  | NA    | 1  | 0  | Low-quality    | Genome-fragment | 2.19  | 0     |
| S8_k141_221822                       | [Full]   | 1086  | No  | NA    | 0  | 1  | Low-quality    | Genome-fragment | 0.18  | 0     |
| S11-final-viral-combined_k141_1327   | [Full]   | 11792 | No  | NA    | 0  | 6  | Not-determined | Genome-fragment | NA    | 0     |
| S11-final-viral-combined_k141_180409 | [Full]   | 3918  | No  | NA    | 0  | 3  | Not-determined | Genome-fragment | NA    | 0     |
| S8_k141_264579                       | [Full]   | 1086  | No  | NA    | 0  | 0  | Low-quality    | Genome-fragment | 2.4   | 0     |
| S9-final-viral-combined_k141_32882   | [Full]   | 1087  | No  | NA    | 0  | 1  | Low-quality    | Genome-fragment | 2.3   | 0     |
| S11-final-viral-combined_k141_84094  | [Full]   | 1791  | No  | NA    | 0  | 1  | Not-determined | Genome-fragment | NA    | 0     |
| S9-final-viral-combined_k141_102751  | [Full]   | 1087  | No  | NA    | 0  | 0  | Low-quality    | Genome-fragment | 1.42  | 0     |
| S11-final-viral-combined_k141_135080 | [Full]   | 1087  | No  | NA    | 0  | 1  | Low-quality    | Genome-fragment | 0.85  | 0     |
| S11-final-viral-combined_k141_98124  | [Full]   | 1543  | No  | NA    | 0  | 2  | Not-determined | Genome-fragment | NA    | 0     |
| S11-final-viral-combined_k141_239970 | [Full]   | 1610  | No  | NA    | 0  | 0  | Not-determined | Genome-fragment | NA    | 0     |
| S11-final-viral-combined_k141_138983 | [Full]   | 9845  | No  | NA    | 0  | 5  | Not-determined | Genome-fragment | NA    | 0     |
| S11-final-viral-combined_k141_193990 | [Full]   | 1087  | Yes | 883   | 1  | 1  | Low-quality    | Genome-fragment | 1.34  | 18.77 |
| S11-final-viral-combined_k141_138991 | [Full]   | 7709  | No  | NA    | 0  | 9  | Not-determined | Genome-fragment | NA    | 0     |
| S1-final-viral-combined_k141_105608  | [Full]   | 1087  | No  | NA    | 0  | 0  | Low-quality    | Genome-fragment | 1.85  | 0     |
| S11-final-viral-combined_k141_194205 | [Full]   | 35517 | No  | NA    | 20 | 1  | Medium-quality | Genome-fragment | 57.83 | 0     |
| S11-final-viral-combined_k141_318179 | [Full]   | 1099  | No  | NA    | 0  | 0  | Not-determined | Genome-fragment | NA    | 0     |
| S3-final-viral-combined_k141_11927   | [Full]   | 1087  | No  | NA    | 2  | 0  | Low-quality    | Genome-fragment | 2.18  | 0     |
| S11-final-viral-combined_k141_180451 | [Full]   | 2010  | No  | NA    | 0  | 2  | Not-determined | Genome-fragment | NA    | 0     |
| S11-final-viral-combined_k141_318209 | [Full]   | 3508  | No  | NA    | 0  | 2  | Not-determined | Genome-fragment | NA    | 0     |
| S11-final-viral-combined_k141_180462 | [Full]   | 1096  | No  | NA    | 0  | 0  | Not-determined | Genome-fragment | NA    | 0     |
| S11-final-viral-combined_k141_304728 | [Full]   | 1610  | No  | NA    | 0  | 1  | Not-determined | Genome-fragment | NA    | 0     |
| S11-final-viral-combined_k141_290674 | [Full]   | 4647  | No  | NA    | 0  | 3  | Not-determined | Genome-fragment | NA    | 0     |
| S7-final-viral-combined_k141_47377   | [H2gene] | 1087  | No  | NA    | 0  | 1  | Low-quality    | Genome-fragment | 1.02  | 0     |
| S11-final-viral-combined_k141_277120 | [Full]   | 1646  | No  | NA    | 0  | 1  | Not-determined | Genome-fragment | NA    | 0     |
| S17-final-viral-combined_k141_126659 | [Full]   | 1087  | No  | NA    | 1  | 0  | Low-quality    | Genome-fragment | 2.53  | 0     |
| S11-final-viral-combined_k141_114441 | [Full]   | 2336  | No  | NA    | 0  | 2  | Not-determined | Genome-fragment | NA    | 0     |
| S12-final-viral-combined_k141_235744 | [Full]   | 1087  | No  | NA    | 0  | 0  | Low-quality    | Genome-fragment | 2.32  | 0     |
| S11-final-viral-combined_k141_304737 | [Full]   | 13474 | No  | NA    | 0  | 6  | Not-determined | Genome-fragment | NA    | 0     |
| S12_k141_188795                      | [Full]   | 1087  | No  | NA    | 0  | 0  | Low-quality    | Genome-fragment | 0.69  | 0     |
| S11-final-viral-combined_k141_318242 | [Full]   | 5155  | No  | NA    | 0  | 3  | Not-determined | Genome-fragment | NA    | 0     |
| S11-final-viral-combined_k141_167054 | [Full]   | 2831  | No  | NA    | 0  | 1  | Not-determined | Genome-fragment | NA    | 0     |
| S11-final-viral-combined_k141_277171 | [Full]   | 3487  | No  | NA    | 0  | 3  | Not-determined | Genome-fragment | NA    | 0     |
| S2-final-viral-combined_k141_114731  | [Full]   | 1087  | No  | NA    | 0  | 0  | Low-quality    | Genome-fragment | 2.55  | 0     |
| S11-final-viral-combined_k141_318255 | [Full]   | 6149  | No  | NA    | 0  | 2  | Not-determined | Genome-fragment | NA    | 0     |
| S2_k141_176191                       | [Full]   | 1087  | No  | NA    | 0  | 0  | Low-quality    | Genome-fragment | 1.68  | 0     |
| S6-final-viral-combined_k141_11606   | [Full]   | 1087  | No  | NA    | 0  | 0  | Low-quality    | Genome-fragment | 0.77  | 0     |
| S8-final-viral-combined_k141_108470  | [Full]   | 1087  | No  | NA    | 0  | 0  | Low-quality    | Genome-fragment | 3.26  | 0     |
| S8_k141_217131                       | [Full]   | 1087  | No  | NA    | 0  | 0  | Low-quality    | Genome-fragment | 2.28  | 0     |
| S11-final-viral-combined_k141_11189  | [Full]   | 1088  | No  | NA    | 0  | 0  | Low-quality    | Genome-fragment | 2.5   | 0     |
| S11-final-viral-combined_k141_290741 | [Full]   | 3672  | No  | NA    | 0  | 4  | Not-determined | Genome-fragment | NA    | 0     |
| S11-final-viral-combined_k141_249558 | [Full]   | 2159  | No  | NA    | 0  | 2  | Not-determined | Genome-fragment | NA    | 0     |
| S11-final-viral-combined_k141_159708 | [H2gene] | 1088  | No  | NA    | 1  | 0  | Low-quality    | Genome-fragment | 2.87  | 0     |
| S11_k141_148037                      | [Full]   | 1088  | No  | NA    | 0  | 1  | Low-quality    | Genome-fragment | 1.93  | 0     |
| S11-final-viral-combined_k141_221958 | [Full]   | 5904  | No  | NA    | 0  | 4  | Not-determined | Genome-fragment | NA    | 0     |
| S11-final-viral-combined_k141_478551 | [Full]   | 1088  | No  | NA    | 1  | 0  | Low-quality    | Genome-fragment | 2.01  | 0     |
| S11-final-viral-combined_k141_208281 | [Full]   | 2473  | No  | NA    | 0  | 0  | Not-determined | Genome-fragment | NA    | 0     |
| S1-final-viral-combined_k141_182328  | [H2gene] | 1088  | No  | NA    | 1  | 0  | Low-quality    | Genome-fragment | 1.76  | 0     |
| S1_k141_332685                       | [Full]   | 1088  | No  | NA    | 0  | 0  | Low-quality    | Genome-fragment | 1.79  | 0     |
| S11-final-viral-combined_k141_249597 | [Full]   | 1223  | No  | NA    | 0  | 0  | Not-determined | Genome-fragment | NA    | 0     |
| S11-final-viral-combined_k141_304991 | [Full]   | 1029  | No  | NA    | 0  | 1  | Not-determined | Genome-fragment | NA    | 0     |
| S3_k141_58021                        | [Full]   | 1088  | No  | NA    | 0  | 0  | Low-quality    | Genome-fragment | 3.14  | 0     |
| S11-final-viral-combined_k141_42825  | [Full]   | 1129  | No  | NA    | 0  | 0  | Not-determined | Genome-fragment | NA    | 0     |
| S11-final-viral-combined_k141_249624 | [Full]   | 1192  | No  | NA    | 0  | 0  | Not-determined | Genome-fragment | NA    | 0     |
| S11-final-viral-combined_k141_1461   | [Full]   | 2336  | No  | NA    | 0  | 0  | Not-determined | Genome-fragment | NA    | 0     |
| S11-final-viral-combined_k141_167194 | [Full]   | 1582  | No  | NA    | 0  | 0  | Not-determined | Genome-fragment | NA    | 0     |
| S11-final-viral-combined_k141_115103 | [Full]   | 5123  | No  | NA    | 0  | 0  | Not-determined | Genome-fragment | NA    | 0     |
| S11-final-viral-combined_k141_290825 | [Full]   | 2823  | No  | NA    | 0  | 2  | Not-determined | Genome-fragment | NA    | 0     |
| S11-final-viral-combined_k141_318352 | [Full]   | 1465  | No  | NA    | 0  | 1  | Not-determined | Genome-fragment | NA    | 0     |
| S11-final-viral-combined_k141_236146 | [Full]   | 2472  | No  | NA    | 0  | 0  | Not-determined | Genome-fragment | NA    | 0     |
| S11-final-viral-combined_k141_236165 | [Full]   | 2736  | No  | NA    | 0  | 2  | Not-determined | Genome-fragment | NA    | 0     |
| S11-final-viral-combined_k141_125755 | [Full]   | 5174  | No  | NA    | 0  | 4  | Not-determined | Genome-fragment | NA    | 0     |
| S11-final-viral-combined_k141_180631 | [Full]   | 1580  | No  | NA    | 0  | 0  | Not-determined | Genome-fragment | NA    | 0     |
| S11-final-viral-combined_k141_318374 | [Full]   | 1204  | No  | NA    | 0  | 0  | Not-determined | Genome-fragment | NA    | 0     |
| S11-final-viral-combined_k141_208315 | [Full]   | 8699  | No  | NA    | 0  | 3  | Not-determined | Genome-fragment | NA    | 0     |
| S11-final-viral-combined_k141_290886 | [Full]   | 1082  | No  | NA    | 0  | 1  | Not-determined | Genome-fragment | NA    | 0     |
| S11-final-viral-combined_k141_29048  | [Full]   | 1418  | No  | NA    | 0  | 0  | Not-determined | Genome-fragment | NA    | 0     |
| S11-final-viral-combined_k141_180646 | [Full]   | 4824  | No  | NA    | 0  | 2  | Not-determined | Genome-fragment | NA    | 0     |
| S3_k141_54716                        | [Full]   | 1088  | No  | NA    | 0  | 0  | Low-quality    | Genome-fragment | 2.65  | 0     |
| S11-final-viral-combined_k141_222067 | [Full]   | 7653  | No  | NA    | 0  | 4  | Not-determined | Genome-fragment | NA    | 0     |
| S11-final-viral-combined_k141_98321  | [Full]   | 1071  | No  | NA    | 0  | 1  | Not-determined | Genome-fragment | NA    | 0     |
| S7-final-viral-combined_k141_113827  | [Full]   | 1088  | No  | NA    | 0  | 0  | Low-quality    | Genome-fragment | 1.48  | 0     |
| S11-final-viral-combined_k141_194482 | [Full]   | 2147  | No  | NA    | 0  | 1  | Not-determined | Genome-fragment | NA    | 0     |
| S11-final-viral-combined_k141_277321 | [Full]   | 7007  | No  | NA    | 0  | 0  | Not-determined | Genome-fragment | NA    | 0     |
| S11-final-viral-combined_k141_277325 | [Full]   | 2426  | No  | NA    | 0  | 1  | Not-determined | Genome-fragment | NA    | 0     |
| S11-final-viral-combined_k141_1594   | [Full]   | 7166  | No  | NA    | 0  | 3  | Not-determined | Genome-fragment | NA    | 0     |
| S11-final-viral-combined_k141_8416   | [Full]   | 2351  | No  | NA    | 16 | 0  | Medium-quality | Genome-fragment | 53.16 | 64.81 |
| S11-final-viral-combined_k141_263485 | [Full]   | 3947  | No  | NA    | 0  | 1  | Not-determined | Genome-fragment | NA    | 0     |
| S11-final-viral-combined_k141_139196 | [Full]   | 2052  | No  | NA    | 0  | 2  | Not-determined | Genome-fragment | NA    | 0     |
| S7-final-viral-combined_k141_218741  | [Full]   | 1088  | No  | NA    | 0  | 0  | Low-quality    | Genome-fragment | 2.55  | 0     |
| S11-final-viral-combined_k141_28039  | [Full]   | 1379  | No  | NA    | 0  | 0  | Not-determined | Genome-fragment | NA    | 0     |
| S11-final-viral-combined_k141_304863 | [Full]   | 1960  | No  | NA    | 0  | 0  | Not-determined | Genome-fragment | NA    | 0     |
| S11-final-viral-combined_k141_180685 | [Full]   | 9701  | No  | NA    | 0  | 6  | Not-determined | Genome-fragment | NA    | 0     |
| S11-final-viral-combined_k141_154801 | [Full]   | 174   | No  | NA    | 0  | 1  | Not-determined | Genome-fragment | NA    | 0     |
| S11-final-viral-combined_k141_194525 | [Full]   | 2249  | No  | NA    | 0  | 0  | Not-determined | Genome-fragment | NA    | 0     |
| S11-final-viral-combined_k141_84363  | [Full]   | 1336  | No  | NA    | 0  | 2  | Not-determined | Genome-fragment | NA    | 0     |
| S11-final-viral-combined_k141_20894  | [Full]   | 2382  | No  | NA    | 0  | 0  | Not-determined | Genome-fragment | NA    | 0     |
| S11-final-viral-combined_k141_263516 | [Full]   | 1363  | No  | NA    | 0  | 0  | Not-determined | Genome-fragment | NA    | 0     |
| S11-final-viral-combined_k141_84378  | [Full]   | 5350  | No  | NA    | 0  | 3  | Not-determined | Genome-fragment | NA    | 0     |
| S11-final-viral-combined_k141_290880 | [Full]   | 3448  | No  | NA    | 0  | 0  | Not-determined | Genome-fragment | NA    | 0     |
| S7-final-viral-combined_k141_119292  | [Full]   | 1088  | No  | NA    | 1  | 0  | Low-quality    | Genome-fragment | 2.46  | 0     |
| S11-final-viral-combined_k141_222198 | [Full]   | 4449  | No  | NA    | 0  | 0  | Not-determined | Genome-fragment | NA    | 0     |
| S7-final-viral-combined_k141_149322  | [H2gene] | 1088  | No  | NA    | 1  | 0  | Low-quality    | Genome-fragment | 0.97  | 0     |
| S7-final-viral-combined_k141_27348   | [Full]   | 1088  | No  | NA    | 0  | 0  | Low-quality    | Genome-fragment | 2.68  | 0     |
| S12-final-viral-combined_k141_252526 | [Full]   | 1088  | No  | NA    | 0  | 0  | Low-quality    | Genome-fragment | 1.63  | 0     |
| S12-final-viral-combined_k141_262623 | [Full]   | 1088  | No  | NA    | 0  | 0  | Low-quality    | Genome-fragment | 1.99  | 0     |
| S11-final-viral-combined_k141_236214 | [Full]   | 92358 | Yes | 32851 | 22 | 50 | Medium-quality | Genome-fragment | 54.08 | 64.81 |
| S11-final-viral-combined_k141_291042 | [Full]   | 4908  | No  | NA    | 0  | 2  | Not-determined | Genome-fragment | NA    | 0     |
| S12-final-viral-combined_k141_33862  | [Full]   | 1088  | No  | NA    | 1  | 0  | Low-quality    | Genome-fragment | 1.77  | 0     |
| S12-final-viral-combined_k141_204824 | [H2gene] | 1088  | No  | NA    | 1  | 0  | Low-quality    | Genome-fragment | 1.89  | 0     |
| S2-final-viral-combined_k141_16642   | [Full]   | 1088  | No  | NA    | 0  | 1  | Low-quality    | Gen             |       |       |



|                                       |          |       |     |       |    |    |                |                 |      |       |
|---------------------------------------|----------|-------|-----|-------|----|----|----------------|-----------------|------|-------|
| S7-final-viral-combined_k141_583011   | [full]   | 1090  | No  | NA    | 0  | 0  | Low-quality    | Genome-fragment | 0.42 | 0     |
| S11-final-viral-combined_k141_845401  | [full]   | 3623  | No  | NA    | 0  | 1  | Not-determined | Genome-fragment | NA   | 0     |
| S7-final-viral-combined_k141_220265   | [H2gene] | 1090  | No  | NA    | 1  | 0  | Low-quality    | Genome-fragment | 3.05 | 0     |
| S11-final-viral-combined_k141_985401  | [full]   | 3233  | No  | NA    | 0  | 0  | Not-determined | Genome-fragment | NA   | 0     |
| S11-final-viral-combined_k141_3050181 | [full]   | 3869  | No  | NA    | 0  | 4  | Not-determined | Genome-fragment | NA   | 0     |
| S7-final-viral-combined_k141_603961   | [H2gene] | 1090  | No  | NA    | 1  | 0  | Low-quality    | Genome-fragment | 1.43 | 0     |
| S17-final-viral-combined_k141_2148001 | [H2gene] | 1090  | No  | NA    | 1  | 0  | Low-quality    | Genome-fragment | 2.44 | 0     |
| S11-final-viral-combined_k141_2223721 | [full]   | 1061  | No  | NA    | 0  | 0  | Not-determined | Genome-fragment | NA   | 0     |
| S11-final-viral-combined_k141_2223721 | [full]   | 1909  | No  | NA    | 0  | 2  | Not-determined | Genome-fragment | NA   | 0     |
| S11-final-viral-combined_k141_292361  | [full]   | 3373  | No  | NA    | 0  | 2  | Not-determined | Genome-fragment | NA   | 0     |
| S11-final-viral-combined_k141_2363901 | [full]   | 1932  | No  | NA    | 0  | 3  | Not-determined | Genome-fragment | NA   | 0     |
| S12-final-viral-combined_k141_365121  | [full]   | 1090  | No  | NA    | 0  | 0  | Low-quality    | Genome-fragment | 1.99 | 0     |
| S11-final-viral-combined_k141_1534281 | [full]   | 2225  | No  | NA    | 0  | 1  | Not-determined | Genome-fragment | NA   | 0     |
| S11-final-viral-combined_k141_2775981 | [full]   | 1242  | No  | NA    | 0  | 1  | Not-determined | Genome-fragment | NA   | 0     |
| S11-final-viral-combined_k141_2086901 | [full]   | 3963  | No  | NA    | 0  | 3  | Not-determined | Genome-fragment | NA   | 0     |
| S11-final-viral-combined_k141_2912001 | [full]   | 6314  | No  | NA    | 0  | 0  | Not-determined | Genome-fragment | NA   | 0     |
| S11-final-viral-combined_k141_1534511 | [full]   | 4906  | No  | NA    | 0  | 1  | Not-determined | Genome-fragment | NA   | 0     |
| S11-final-viral-combined_k141_1395301 | [full]   | 3908  | No  | NA    | 0  | 2  | Not-determined | Genome-fragment | NA   | 0     |
| S12_k141_269377                       |          | 1090  | No  | NA    | 0  | 1  | Low-quality    | Genome-fragment | 2.08 | 0     |
| S11-final-viral-combined_k141_1947361 | [full]   | 2452  | No  | NA    | 0  | 2  | Not-determined | Genome-fragment | NA   | 0     |
| S11-final-viral-combined_k141_986001  | [full]   | 1525  | No  | NA    | 0  | 0  | Not-determined | Genome-fragment | NA   | 0     |
| S2-final-viral-combined_k141_213701   | [full]   | 1090  | No  | NA    | 0  | 1  | Low-quality    | Genome-fragment | 2.82 | 0     |
| S11-final-viral-combined_k141_157541  | [full]   | 1853  | No  | NA    | 0  | 3  | Not-determined | Genome-fragment | NA   | 0     |
| S6-final-viral-combined_k141_170191   | [full]   | 1090  | No  | NA    | 0  | 1  | Low-quality    | Genome-fragment | 1.52 | 0     |
| S9-final-viral-combined_k141_843881   | [full]   | 1091  | No  | NA    | 1  | 0  | Low-quality    | Genome-fragment | 2.64 | 0     |
| S11-final-viral-combined_k141_2458601 | [full]   | 1702  | No  | NA    | 0  | 1  | Not-determined | Genome-fragment | NA   | 0     |
| S11-final-viral-combined_k141_1118441 | [full]   | 5929  | No  | NA    | 0  | 4  | Not-determined | Genome-fragment | NA   | 0     |
| S11-final-viral-combined_k141_627171  | [full]   | 1091  | No  | NA    | 0  | 0  | Low-quality    | Genome-fragment | 2.46 | 0     |
| S11-final-viral-combined_k141_431491  | [full]   | 1365  | No  | NA    | 0  | 1  | Not-determined | Genome-fragment | NA   | 0     |
| S11-final-viral-combined_k141_2912721 | [full]   | 2536  | No  | NA    | 0  | 2  | Not-determined | Genome-fragment | NA   | 0     |
| S11-final-viral-combined_k141_570821  | [full]   | 1033  | No  | NA    | 0  | 2  | Not-determined | Genome-fragment | NA   | 0     |
| S1-final-viral-combined_k141_313961   | [full]   | 1091  | No  | NA    | 1  | 0  | Low-quality    | Genome-fragment | 0.67 | 0     |
| S11-final-viral-combined_k141_1676081 | [full]   | 2858  | No  | NA    | 0  | 5  | Not-determined | Genome-fragment | NA   | 0     |
| S1-final-viral-combined_k141_536861   | [full]   | 1091  | No  | NA    | 2  | 0  | Low-quality    | Genome-fragment | 2.25 | 0     |
| S11-final-viral-combined_k141_157751  | [full]   | 17898 | No  | NA    | 0  | 6  | Not-determined | Genome-fragment | NA   | 0     |
| S11-final-viral-combined_k141_2776581 | [full]   | 2099  | No  | NA    | 0  | 2  | Not-determined | Genome-fragment | NA   | 0     |
| S5-final-viral-combined_k141_1877361  | [H2gene] | 1091  | No  | NA    | 1  | 0  | Low-quality    | Genome-fragment | 2.67 | 0     |
| S17-final-viral-combined_k141_2134431 | [full]   | 1091  | No  | NA    | 1  | 0  | Low-quality    | Genome-fragment | 2.67 | 0     |
| S11-final-viral-combined_k141_1138681 | [full]   | 2379  | No  | NA    | 0  | 0  | Not-determined | Genome-fragment | NA   | 0     |
| S17-final-viral-combined_k141_1181951 | [full]   | 1091  | No  | NA    | 0  | 0  | Low-quality    | Genome-fragment | 1.33 | 0     |
| S11-final-viral-combined_k141_1810291 | [full]   | 2467  | No  | NA    | 0  | 1  | Not-determined | Genome-fragment | NA   | 0     |
| S11-final-viral-combined_k141_249691  | [full]   | 3963  | No  | NA    | 0  | 1  | Not-determined | Genome-fragment | NA   | 0     |
| S12-final-viral-combined_k141_1173271 | [H2gene] | 1091  | No  | NA    | 1  | 0  | Low-quality    | Genome-fragment | 1.79 | 0     |
| S11-final-viral-combined_k141_3052091 | [full]   | 1496  | No  | NA    | 0  | 3  | Not-determined | Genome-fragment | NA   | 0     |
| S11-final-viral-combined_k141_2913331 | [full]   | 10306 | No  | NA    | 0  | 1  | Not-determined | Genome-fragment | NA   | 0     |
| S11-final-viral-combined_k141_984791  | [full]   | 2957  | No  | NA    | 0  | 3  | Not-determined | Genome-fragment | NA   | 0     |
| S12-final-viral-combined_k141_166171  | [H2gene] | 1091  | No  | NA    | 2  | 0  | Low-quality    | Genome-fragment | 1.96 | 0     |
| S11-final-viral-combined_k141_129061  | [full]   | 1647  | No  | NA    | 0  | 0  | Not-determined | Genome-fragment | NA   | 0     |
| S2-final-viral-combined_k141_2441261  | [full]   | 1091  | No  | NA    | 0  | 0  | Low-quality    | Genome-fragment | 0.74 | 0     |
| S2_k141_129732                        |          | 1091  | No  | NA    | 0  | 0  | Low-quality    | Genome-fragment | 1.82 | 0     |
| S11-final-viral-combined_k141_318741  | [full]   | 1536  | No  | NA    | 0  | 0  | Not-determined | Genome-fragment | NA   | 0     |
| S4-final-viral-combined_k141_1522721  | [full]   | 1091  | No  | NA    | 0  | 0  | Low-quality    | Genome-fragment | 2.51 | 0     |
| S11-final-viral-combined_k141_2365381 | [full]   | 1224  | No  | NA    | 0  | 0  | Not-determined | Genome-fragment | NA   | 0     |
| S11-final-viral-combined_k141_3187481 | [full]   | 2564  | No  | NA    | 0  | 1  | Not-determined | Genome-fragment | NA   | 0     |
| S11-final-viral-combined_k141_2498981 | [full]   | 1055  | No  | NA    | 0  | 0  | Not-determined | Genome-fragment | NA   | 0     |
| S11-final-viral-combined_k141_3187611 | [full]   | 2304  | No  | NA    | 0  | 1  | Not-determined | Genome-fragment | NA   | 0     |
| S11-final-viral-combined_k141_1677121 | [full]   | 2996  | No  | NA    | 0  | 1  | Not-determined | Genome-fragment | NA   | 0     |
| S4_k141_49353                         |          | 1091  | No  | NA    | 0  | 0  | Low-quality    | Genome-fragment | 0.44 | 0     |
| S6_k141_100262                        |          | 1091  | No  | NA    | 1  | 0  | Low-quality    | Genome-fragment | 2.25 | 0     |
| S11-final-viral-combined_k141_987301  | [full]   | 5675  | No  | NA    | 0  | 3  | Not-determined | Genome-fragment | NA   | 0     |
| S8-final-viral-combined_k141_1740571  | [full]   | 1091  | No  | NA    | 0  | 0  | Low-quality    | Genome-fragment | 2.06 | 0     |
| S11-final-viral-combined_k141_848381  | [full]   | 1111  | No  | NA    | 0  | 2  | Not-determined | Genome-fragment | NA   | 0     |
| S9-final-viral-combined_k141_646931   | [H2gene] | 1092  | No  | NA    | 1  | 0  | Low-quality    | Genome-fragment | 2.96 | 0     |
| S11-final-viral-combined_k141_2638651 | [full]   | 1537  | No  | NA    | 0  | 2  | Not-determined | Genome-fragment | NA   | 0     |
| S9_k141_59339                         |          | 1092  | No  | NA    | 0  | 1  | Low-quality    | Genome-fragment | 1.82 | 0     |
| S11-final-viral-combined_k141_2089561 | [full]   | 2340  | No  | NA    | 0  | 0  | Not-determined | Genome-fragment | NA   | 0     |
| S11-final-viral-combined_k141_2914101 | [full]   | 1489  | No  | NA    | 0  | 1  | Not-determined | Genome-fragment | NA   | 0     |
| S9_k141_12663                         |          | 1092  | No  | NA    | 2  | 0  | Low-quality    | Genome-fragment | 2.66 | 0     |
| S11-final-viral-combined_k141_433371  | [full]   | 4912  | No  | NA    | 0  | 2  | Not-determined | Genome-fragment | NA   | 0     |
| S11-final-viral-combined_k141_2618891 | [full]   | 4397  | No  | NA    | 0  | 2  | Not-determined | Genome-fragment | NA   | 0     |
| S11-final-viral-combined_k141_1600371 | [H2gene] | 1092  | No  | NA    | 1  | 0  | Low-quality    | Genome-fragment | 2.74 | 0     |
| S11-final-viral-combined_k141_987951  | [full]   | 2152  | No  | NA    | 0  | 0  | Not-determined | Genome-fragment | NA   | 0     |
| S11_k141_55103                        |          | 1092  | No  | NA    | 0  | 0  | Low-quality    | Genome-fragment | 1.64 | 0     |
| S11-final-viral-combined_k141_2366171 | [full]   | 1236  | No  | NA    | 0  | 0  | Not-determined | Genome-fragment | NA   | 0     |
| S1-final-viral-combined_k141_1540271  | [H2gene] | 1092  | No  | NA    | 0  | 0  | Low-quality    | Genome-fragment | 2.06 | 0     |
| S11-final-viral-combined_k141_3052981 | [full]   | 1117  | No  | NA    | 0  | 0  | Not-determined | Genome-fragment | NA   | 0     |
| S11-final-viral-combined_k141_3053211 | [full]   | 1003  | No  | NA    | 0  | 1  | Not-determined | Genome-fragment | NA   | 0     |
| S11-final-viral-combined_k141_434001  | [full]   | 3299  | No  | NA    | 0  | 2  | Not-determined | Genome-fragment | NA   | 0     |
| S11-final-viral-combined_k141_704531  | [full]   | 1039  | No  | NA    | 0  | 0  | Not-determined | Genome-fragment | NA   | 0     |
| S11-final-viral-combined_k141_2779051 | [full]   | 2919  | No  | NA    | 0  | 2  | Not-determined | Genome-fragment | NA   | 0     |
| S11-final-viral-combined_k141_1677631 | [full]   | 1135  | No  | NA    | 0  | 0  | Not-determined | Genome-fragment | NA   | 0     |
| S11-final-viral-combined_k141_2914651 | [full]   | 1188  | No  | NA    | 0  | 1  | Not-determined | Genome-fragment | NA   | 0     |
| S1_k141_159061                        |          | 1092  | No  | NA    | 0  | 0  | Low-quality    | Genome-fragment | 0.26 | 0     |
| S11-final-viral-combined_k141_2090251 | [full]   | 1289  | No  | NA    | 0  | 2  | Not-determined | Genome-fragment | NA   | 0     |
| S11-final-viral-combined_k141_4340421 | [full]   | 22229 | No  | NA    | 0  | 4  | Not-determined | Genome-fragment | NA   | 0     |
| S11-final-viral-combined_k141_2367121 | [full]   | 1082  | No  | NA    | 0  | 1  | Not-determined | Genome-fragment | NA   | 0     |
| S9_k141_45297                         |          | 1092  | No  | NA    | 0  | 0  | Low-quality    | Genome-fragment | 0.5  | 0     |
| S11-final-viral-combined_k141_2367231 | [full]   | 2957  | No  | NA    | 0  | 1  | Not-determined | Genome-fragment | NA   | 0     |
| S11-final-viral-combined_k141_2053671 | [full]   | 9795  | No  | NA    | 0  | 6  | Not-determined | Genome-fragment | NA   | 0     |
| S5-final-viral-combined_k141_178751   | [H2gene] | 1092  | No  | NA    | 1  | 0  | Low-quality    | Genome-fragment | 1.81 | 0     |
| S11-final-viral-combined_k141_1950111 | [full]   | 1524  | No  | NA    | 0  | 1  | Not-determined | Genome-fragment | NA   | 0     |
| S5-final-viral-combined_k141_189541   | [H2gene] | 1092  | No  | NA    | 0  | 0  | Low-quality    | Genome-fragment | 0.65 | 0     |
| S17-k141_129812                       |          | 1092  | No  | NA    | 3  | 0  | Low-quality    | Genome-fragment | 2.55 | 0     |
| S11-final-viral-combined_k141_704681  | [full]   | 2208  | No  | NA    | 0  | 1  | Not-determined | Genome-fragment | NA   | 0     |
| S11-final-viral-combined_k141_2914931 | [full]   | 11061 | No  | NA    | 0  | 3  | Not-determined | Genome-fragment | NA   | 0     |
| S11-final-viral-combined_k141_1398791 | [full]   | 6832  | No  | NA    | 0  | 3  | Not-determined | Genome-fragment | NA   | 0     |
| S11-final-viral-combined_k141_573551  | [full]   | 4273  | No  | NA    | 0  | 1  | Not-determined | Genome-fragment | NA   | 0     |
| S11-final-viral-combined_k141_1950331 | [full]   | 1242  | No  | NA    | 0  | 0  | Not-determined | Genome-fragment | NA   | 0     |
| S11-final-viral-combined_k141_849511  | [full]   | 2743  | No  | NA    | 0  | 0  | Not-determined | Genome-fragment | NA   | 0     |
| S11-final-viral-combined_k141_1812171 | [full]   | 2259  | No  | NA    | 0  | 3  | Not-determined | Genome-fragment | NA   | 0     |
| S11-final-viral-combined_k141_1536781 | [full]   | 4348  | No  | NA    | 0  | 2  | Not-determined | Genome-fragment | NA   | 0     |
| S11-final-viral-combined_k141_1610311 | [full]   | 2891  | No  | NA    | 0  | 1  | Not-determined | Genome-fragment | NA   | 0     |
| S2-final-viral-combined_k141_1019701  | [full]   | 1092  | No  | NA    | 0  | 0  | Low-quality    | Genome-fragment | 0.94 | 0     |
| S11-final-viral-combined_k141_849561  | [full]   | 1375  | No  | NA    | 0  | 2  | Not-determined | Genome-fragment | NA   | 0     |
| S2-final-viral-combined_k141_1948391  | [full]   | 1092  | No  | NA    | 0  | 1  | Low-quality    | Genome-fragment | 1.36 | 0     |
| S11-final-viral-combined_k141_1121001 | [full]   | 1866  | No  | NA    | 0  | 2  | Not-determined | Genome-fragment | NA   | 0     |
| S11-final-viral-combined_k141_2227291 | [full]   | 1271  | No  | NA    | 0  | 1  | Not-determined | Genome-fragment | NA   | 0     |
| S11-final-viral-combined_k141_1676281 | [full]   | 1709  | No  | NA    | 0  | 2  | Not-determined | Genome-fragment | NA   | 0     |
| S2-final-viral-combined_k141_1114001  | [full]   | 1092  | No  | NA    | 0  | 0  | Low-quality    | Genome-fragment | 2.67 | 0     |
| S11-final-viral-combined_k141_2780921 | [full]   | 1577  | No  | NA    | 0  | 0  | Not-determined | Genome-fragment | NA   | 0     |
| S2_k141_238357                        |          | 1092  | No  | NA    | 1  | 0  | Low-quality    | Genome-fragment | 2.81 | 0     |
| S11-final-viral-combined_k141_574071  | [full]   | 7317  | No  | NA    | 0  | 0  | Not-determined | Genome-fragment | NA   | 0     |
| S11-final-viral-combined_k141_1399121 | [full]   | 1417  | No  | NA    | 0  | 0  | Not-determined | Genome-fragment | NA   | 0     |
| S11-final-viral-combined_k141_3190181 | [full]   | 3487  | No  | NA    | 0  | 0  | Not-determined | Genome-fragment | NA   | 0     |
| S11-final-viral-combined_k141_574121  | [full]   | 1996  | No  | NA    | 0  | 2  | Not-determined | Genome-fragment | NA   | 0     |
| S11-final-viral-combined_k141_705701  | [full]   | 1184  | No  | NA    | 0  | 0  | Not-determined | Genome-fragment | NA   | 0     |
| S11-final-viral-combined_k141_2368841 | [full]   | 1821  | No  | NA    | 0  | 2  | Not-determined | Genome-fragment | NA   | 0     |
| S11-final-viral-combined_k141_2368941 | [full]   | 2215  | No  | NA    | 0  | 0  | Not-determined | Genome-fragment | NA   | 0     |
| S11-final-viral-combined_k141_2646501 | [full]   | 97251 | Yes | 49308 | 22 | 31 | Complete       | High-quality    | 100  | 49.3  |
| S4-final-viral-combined_k141_1201791  | [full]   | 1092  | No  | NA    | 0  | 2  | Low-quality    | Genome-fragment | 1.48 | 0     |
| S11-final-viral-combined_k141_1399391 | [full]   | 10462 | No  | NA    | 0  | 3  | Not-determined | Genome-fragment | NA   | 0     |
| S11-final-viral-combined_k141_989511  | [full]   | 1074  | No  | NA    | 0  | 1  | Not-determined | Genome-fragment | NA   | 0     |
| S8_k141_255645                        |          | 1092  | No  | NA    | 0  | 1  | Low-quality    | Genome-fragment | 0.39 | 0     |
| S9-final-viral-combined_k141_984971   | [full]   | 1093  | No  | NA    | 1  | 0  | Low-quality    | Genome-fragment | 2.9  | 0     |
| S11-final-viral-combined_k141_1564751 | [full]   | 1092  | No  | NA    | 0  | 1  | Low-quality    | Genome-fragment | 3.04 | 0     |
| S11-final-viral-combined_k141_1398921 | [full]   | 1093  | No  | NA    | 0  | 0  | Low-quality    | Genome-fragment | 2.94 | 0     |
| S11-final-viral-combined_k141_219771  | [full]   | 1493  | No  | NA    | 0  | 0  | Not-determined | Genome-fragment | NA   | 0     |
| S1-final-viral-combined_k141_2577851  | [full]   | 1093  | Yes | 880   | 0  | 11 | Not-determined | Genome-fragment | 2.66 | 19.49 |



|                                      |          |       |     |    |       |    |                |                 |                 |       |       |
|--------------------------------------|----------|-------|-----|----|-------|----|----------------|-----------------|-----------------|-------|-------|
| S11-final-viral-combined_k141_20845  | [full]   | 2785  | No  | NA | 0     | 0  | Not-determined | Genome-fragment | NA              | 0     | 0     |
| S8-final-viral-combined_k141_49344   | [H2gene] | 1094  | No  | NA | 1     | 0  | Low-quality    | Genome-fragment | NA              | 1.74  | 0     |
| S11-final-viral-combined_k141_305809 | [full]   | 2121  | No  | NA | 0     | 0  | Not-determined | Genome-fragment | NA              | 0     | 0     |
| S11-final-viral-combined_k141_505099 | [full]   | 1802  | No  | NA | 0     | 0  | Not-determined | Genome-fragment | NA              | 0     | 0     |
| S11-final-viral-combined_k141_278316 | [full]   | 1475  | No  | NA | 0     | 1  | Not-determined | Genome-fragment | NA              | 0     | 0     |
| S11-final-viral-combined_k141_250516 | [full]   | 1573  | No  | NA | 0     | 1  | Not-determined | Genome-fragment | NA              | 0     | 0     |
| S11-final-viral-combined_k141_209521 | [full]   | 1256  | No  | NA | 0     | 1  | Not-determined | Genome-fragment | NA              | 0     | 0     |
| S9-final-viral-combined_k141_22349   | [full]   | 1095  | No  | NA | 1     | 0  | Low-quality    | Genome-fragment | NA              | 2.37  | 0     |
| S11-final-viral-combined_k141_209821 | [full]   | 4955  | No  | NA | 0     | 2  | Not-determined | Genome-fragment | NA              | 0     | 0     |
| S11-final-viral-combined_k141_126580 | [full]   | 1776  | No  | NA | 0     | 2  | Not-determined | Genome-fragment | NA              | 0     | 0     |
| S11-final-viral-combined_k141_168048 | [full]   | 52585 | Yes | NA | 29594 | 20 | 10             | Complete        | High-quality    | 100   | 43.72 |
| S11-final-viral-combined_k141_278373 | [full]   | 3373  | No  | NA | 0     | 0  | Low-quality    | Genome-fragment | NA              | 0     | 0     |
| S11-final-viral-combined_k141_321266 | [full]   | 1095  | No  | NA | 0     | 0  | Low-quality    | Genome-fragment | NA              | 1.32  | 0     |
| S11-final-viral-combined_k141_234097 | [full]   | 1095  | No  | NA | 0     | 3  | Low-quality    | Genome-fragment | NA              | 0.32  | 0     |
| S11-final-viral-combined_k141_123886 | [full]   | 1095  | No  | NA | 0     | 0  | Low-quality    | Genome-fragment | NA              | 2.59  | 0     |
| S11-final-viral-combined_k141_222597 | [full]   | 4457  | No  | NA | 0     | 6  | Not-determined | Genome-fragment | NA              | 0     | 0     |
| S5-final-viral-combined_k141_167942  | [full]   | 1095  | No  | NA | 0     | 0  | Low-quality    | Genome-fragment | NA              | 2.25  | 0     |
| S11-final-viral-combined_k141_168091 | [full]   | 2626  | No  | NA | 0     | 2  | Not-determined | Genome-fragment | NA              | 0     | 0     |
| S11-final-viral-combined_k141_140237 | [full]   | 1642  | No  | NA | 0     | 2  | Not-determined | Genome-fragment | NA              | 0     | 0     |
| S7-final-viral-combined_k141_239555  | [full]   | 1095  | No  | NA | 1     | 0  | Low-quality    | Genome-fragment | NA              | 0.77  | 0     |
| S11-final-viral-combined_k141_57802  | [full]   | 1624  | No  | NA | 0     | 1  | Not-determined | Genome-fragment | NA              | 0     | 0     |
| S11-final-viral-combined_k141_140250 | [full]   | 6783  | No  | NA | 0     | 3  | Not-determined | Genome-fragment | NA              | 0     | 0     |
| S7_k141_28532                        |          | 1095  | No  | NA | 0     | 0  | Low-quality    | Genome-fragment | NA              | 2.63  | 0     |
| S12-final-viral-combined_k141_188308 | [H2gene] | 1095  | No  | NA | 1     | 0  | Low-quality    | Genome-fragment | NA              | 1.2   | 0     |
| S11-final-viral-combined_k141_25871  | [full]   | 1570  | No  | NA | 0     | 0  | Not-determined | Genome-fragment | NA              | 0     | 0     |
| S11-final-viral-combined_k141_181414 | [full]   | 18242 | No  | NA | 0     | 14 | Not-determined | Genome-fragment | NA              | 0     | 0     |
| S11-final-viral-combined_k141_140272 | [full]   | 1717  | No  | NA | 0     | 2  | Not-determined | Genome-fragment | NA              | 0     | 0     |
| S11-final-viral-combined_k141_20597  | [full]   | 1279  | No  | NA | 0     | 1  | Not-determined | Genome-fragment | NA              | 0     | 0     |
| S12-final-viral-combined_k141_71081  | [H2gene] | 1095  | No  | NA | 0     | 0  | Low-quality    | Genome-fragment | NA              | 1.97  | 0     |
| S11-final-viral-combined_k141_43818  | [full]   | 3280  | No  | NA | 1     | 0  | 2              | Not-determined  | Genome-fragment | NA    | 0     |
| S11-final-viral-combined_k141_154076 | [full]   | 1004  | No  | NA | 0     | 0  | Not-determined | Genome-fragment | NA              | 0     | 0     |
| S11-final-viral-combined_k141_30934  | [full]   | 1935  | No  | NA | 0     | 2  | Not-determined | Genome-fragment | NA              | 0     | 0     |
| S11-final-viral-combined_k141_99216  | [full]   | 1503  | No  | NA | 0     | 1  | Not-determined | Genome-fragment | NA              | 0     | 0     |
| S11-final-viral-combined_k141_237088 | [full]   | 1058  | No  | NA | 0     | 0  | Not-determined | Genome-fragment | NA              | 0     | 0     |
| S11-final-viral-combined_k141_57868  | [full]   | 6395  | No  | NA | 0     | 4  | Not-determined | Genome-fragment | NA              | 0     | 0     |
| S11-final-viral-combined_k141_26193  | [full]   | 1812  | No  | NA | 0     | 0  | Not-determined | Genome-fragment | NA              | 2.03  | 0     |
| S12-final-viral-combined_k141_356955 | [H2gene] | 1095  | No  | NA | 1     | 0  | Low-quality    | Genome-fragment | NA              | 1.48  | 0     |
| S11-final-viral-combined_k141_168179 | [full]   | 1797  | No  | NA | 0     | 1  | Not-determined | Genome-fragment | NA              | 0     | 0     |
| S11-final-viral-combined_k141_71008  | [full]   | 4359  | No  | NA | 0     | 4  | Not-determined | Genome-fragment | NA              | 0     | 0     |
| S12_k141_137048                      |          | 1095  | No  | NA | 1     | 0  | Low-quality    | Genome-fragment | NA              | 2.13  | 0     |
| S12_k141_304895                      |          | 1095  | No  | NA | 0     | 0  | Low-quality    | Genome-fragment | NA              | 2.3   | 0     |
| S2-final-viral-combined_k141_130159  | [full]   | 1095  | No  | NA | 0     | 0  | Low-quality    | Genome-fragment | NA              | 1.47  | 0     |
| S11-final-viral-combined_k141_195395 | [full]   | 1126  | No  | NA | 0     | 1  | Not-determined | Genome-fragment | NA              | 0     | 0     |
| S11-final-viral-combined_k141_112367 | [full]   | 1498  | No  | NA | 0     | 0  | Not-determined | Genome-fragment | NA              | 0     | 0     |
| S11-final-viral-combined_k141_16242  | [full]   | 4543  | No  | NA | 0     | 3  | Not-determined | Genome-fragment | NA              | 0     | 0     |
| S2-final-viral-combined_k141_11680   | [full]   | 1095  | No  | NA | 0     | 0  | Low-quality    | Genome-fragment | NA              | 2.11  | 0     |
| S2-final-viral-combined_k141_174231  | [H2gene] | 1095  | No  | NA | 1     | 0  | Low-quality    | Genome-fragment | NA              | 1.23  | 0     |
| S11-final-viral-combined_k141_305945 | [full]   | 16105 | No  | NA | 0     | 4  | Not-determined | Genome-fragment | NA              | 0     | 0     |
| S11-final-viral-combined_k141_264325 | [full]   | 1355  | No  | NA | 0     | 2  | Not-determined | Genome-fragment | NA              | 0     | 0     |
| S11-final-viral-combined_k141_278498 | [full]   | 1730  | No  | NA | 0     | 0  | Not-determined | Genome-fragment | NA              | 0     | 0     |
| S11-final-viral-combined_k141_278504 | [full]   | 1838  | No  | NA | 0     | 0  | Not-determined | Genome-fragment | NA              | 0     | 0     |
| S11-final-viral-combined_k141_428041 | [full]   | 1967  | No  | NA | 0     | 1  | Not-determined | Genome-fragment | NA              | 0     | 0     |
| S11-final-viral-combined_k141_126619 | [full]   | 2005  | No  | NA | 0     | 0  | Not-determined | Genome-fragment | NA              | 0     | 0     |
| S11-final-viral-combined_k141_126622 | [full]   | 1951  | No  | NA | 0     | 2  | Not-determined | Genome-fragment | NA              | 0     | 0     |
| S2_k141_232206                       |          | 1095  | No  | NA | 0     | 0  | Low-quality    | Genome-fragment | NA              | 0.29  | 0     |
| S4-final-viral-combined_k141_85774   | [full]   | 1095  | No  | NA | 0     | 0  | Low-quality    | Genome-fragment | NA              | 2.15  | 0     |
| S4-final-viral-combined_k141_60163   | [full]   | 1095  | No  | NA | 0     | 0  | Low-quality    | Genome-fragment | NA              | 2.35  | 0     |
| S11-final-viral-combined_k141_305980 | [full]   | 2416  | No  | NA | 0     | 3  | Not-determined | Genome-fragment | NA              | 0     | 0     |
| S4_k141_126461                       |          | 1095  | No  | NA | 0     | 0  | Low-quality    | Genome-fragment | NA              | 1.15  | 0     |
| S11-final-viral-combined_k141_264382 | [full]   | 1876  | No  | NA | 0     | 1  | Not-determined | Genome-fragment | NA              | 0     | 0     |
| S9-final-viral-combined_k141_88662   | [full]   | 1096  | No  | NA | 0     | 0  | Low-quality    | Genome-fragment | NA              | 2.7   | 0     |
| S11-final-viral-combined_k141_81231  | [full]   | 1096  | No  | NA | 0     | 0  | Low-quality    | Genome-fragment | NA              | 2.03  | 0     |
| S1-final-viral-combined_k141_280478  | [full]   | 1096  | No  | NA | 1     | 0  | Low-quality    | Genome-fragment | NA              | 3.13  | 0     |
| S1_k141_393818                       |          | 1096  | No  | NA | 3     | 0  | Low-quality    | Genome-fragment | NA              | 0.69  | 0     |
| S11-final-viral-combined_k141_140338 | [full]   | 2324  | No  | NA | 0     | 3  | Not-determined | Genome-fragment | NA              | 0     | 0     |
| S11-final-viral-combined_k141_112434 | [full]   | 2033  | No  | NA | 0     | 0  | Not-determined | Genome-fragment | NA              | 0     | 0     |
| S3-final-viral-combined_k141_6930    | [full]   | 1096  | No  | NA | 0     | 0  | Low-quality    | Genome-fragment | NA              | 1.76  | 0     |
| S11-final-viral-combined_k141_181581 | [full]   | 4750  | No  | NA | 0     | 2  | Not-determined | Genome-fragment | NA              | 0     | 0     |
| S11-final-viral-combined_k141_27431  | [full]   | 4672  | No  | NA | 0     | 0  | Not-determined | Genome-fragment | NA              | 0     | 0     |
| S5-final-viral-combined_k141_135712  | [full]   | 1096  | No  | NA | 0     | 0  | Low-quality    | Genome-fragment | NA              | 1.33  | 0     |
| S11-final-viral-combined_k141_305996 | [full]   | 1018  | No  | NA | 0     | 1  | Not-determined | Genome-fragment | NA              | 0     | 0     |
| S11-final-viral-combined_k141_112476 | [full]   | 1090  | No  | NA | 0     | 1  | Not-determined | Genome-fragment | NA              | 0     | 0     |
| S5-final-viral-combined_k141_64376   | [full]   | 1096  | No  | NA | 1     | 0  | Low-quality    | Genome-fragment | NA              | 2.38  | 0     |
| S11-final-viral-combined_k141_195425 | [full]   | 29097 | No  | NA | 6     | 2  | Medium-quality | Genome-fragment | NA              | 67.93 | 0     |
| S5-final-viral-combined_k141_209623  | [full]   | 1096  | No  | NA | 1     | 0  | Low-quality    | Genome-fragment | NA              | 1.88  | 0     |
| S11-final-viral-combined_k141_209769 | [full]   | 2583  | No  | NA | 0     | 0  | Not-determined | Genome-fragment | NA              | 0     | 0     |
| S5-final-viral-combined_k141_58369   | [full]   | 1096  | No  | NA | 0     | 0  | Low-quality    | Genome-fragment | NA              | 2.58  | 0     |
| S11-final-viral-combined_k141_223216 | [full]   | 1246  | No  | NA | 0     | 0  | Not-determined | Genome-fragment | NA              | 0     | 0     |
| S5-final-viral-combined_k141_184491  | [H2gene] | 1096  | No  | NA | 0     | 0  | Low-quality    | Genome-fragment | NA              | 1.35  | 0     |
| S7-final-viral-combined_k141_170368  | [full]   | 1096  | No  | NA | 0     | 0  | Low-quality    | Genome-fragment | NA              | 0.57  | 0     |
| S7-final-viral-combined_k141_215321  | [H2gene] | 1096  | No  | NA | 1     | 0  | Low-quality    | Genome-fragment | NA              | 0.76  | 0     |
| S11-final-viral-combined_k141_30178  | [full]   | 1697  | No  | NA | 0     | 0  | Not-determined | Genome-fragment | NA              | 0     | 0     |
| S17-final-viral-combined_k141_85241  | [full]   | 1096  | No  | NA | 2     | 0  | Low-quality    | Genome-fragment | NA              | 2.92  | 0     |
| S11-final-viral-combined_k141_319432 | [full]   | 1999  | No  | NA | 0     | 1  | Not-determined | Genome-fragment | NA              | 0     | 0     |
| S17-final-viral-combined_k141_263280 | [H2gene] | 1096  | No  | NA | 0     | 0  | Low-quality    | Genome-fragment | NA              | 2.33  | 0     |
| S12-final-viral-combined_k141_35770  | [full]   | 1096  | No  | NA | 2     | 0  | Low-quality    | Genome-fragment | NA              | 2.17  | 0     |
| S11-final-viral-combined_k141_112535 | [full]   | 12484 | No  | NA | 0     | 9  | Not-determined | Genome-fragment | NA              | 0     | 0     |
| S11-final-viral-combined_k141_58063  | [full]   | 5458  | No  | NA | 0     | 6  | Not-determined | Genome-fragment | NA              | 0     | 0     |
| S11-final-viral-combined_k141_205821 | [full]   | 2018  | No  | NA | 0     | 2  | Not-determined | Genome-fragment | NA              | 0     | 0     |
| S12-final-viral-combined_k141_216548 | [full]   | 1096  | No  | NA | 0     | 1  | Low-quality    | Genome-fragment | NA              | 0.82  | 0     |
| S11-final-viral-combined_k141_278616 | [full]   | 6260  | No  | NA | 0     | 3  | Not-determined | Genome-fragment | NA              | 0     | 0     |
| S11-final-viral-combined_k141_278622 | [full]   | 2558  | No  | NA | 0     | 3  | Not-determined | Genome-fragment | NA              | 0     | 0     |
| S12-final-viral-combined_k141_310809 | [H2gene] | 1096  | No  | NA | 2     | 0  | Low-quality    | Genome-fragment | NA              | 1.35  | 0     |
| S11-final-viral-combined_k141_85317  | [full]   | 4878  | No  | NA | 0     | 3  | Not-determined | Genome-fragment | NA              | 0     | 0     |
| S11-final-viral-combined_k141_168339 | [full]   | 5621  | No  | NA | 0     | 2  | Not-determined | Genome-fragment | NA              | 0     | 0     |
| S12_k141_59388                       |          | 1096  | No  | NA | 0     | 1  | Low-quality    | Genome-fragment | NA              | 1.21  | 0     |
| S11-final-viral-combined_k141_112546 | [full]   | 3378  | No  | NA | 0     | 3  | Not-determined | Genome-fragment | NA              | 0     | 0     |
| S11-final-viral-combined_k141_154833 | [full]   | 3327  | No  | NA | 0     | 2  | Not-determined | Genome-fragment | NA              | 0     | 0     |
| S4-final-viral-combined_k141_17991   | [full]   | 1096  | No  | NA | 0     | 0  | Low-quality    | Genome-fragment | NA              | 3.17  | 0     |
| S11-final-viral-combined_k141_250800 | [full]   | 4425  | No  | NA | 0     | 3  | Not-determined | Genome-fragment | NA              | 0     | 0     |
| S4-final-viral-combined_k141_144693  | [full]   | 1096  | No  | NA | 2     | 0  | Low-quality    | Genome-fragment | NA              | 2.77  | 0     |
| S6_k141_66036                        |          | 1096  | No  | NA | 0     | 0  | Low-quality    | Genome-fragment | NA              | 1.39  | 0     |
| S8-final-viral-combined_k141_232863  | [full]   | 1096  | No  | NA | 0     | 1  | Low-quality    | Genome-fragment | NA              | 1.43  | 0     |
| S8-final-viral-combined_k141_168306  | [full]   | 1096  | No  | NA | 0     | 3  | Low-quality    | Genome-fragment | NA              | 1.34  | 0     |
| S1-final-viral-combined_k141_80311   | [full]   | 1097  | No  | NA | 0     | 1  | Low-quality    | Genome-fragment | NA              | 0.8   | 0     |
| S11-final-viral-combined_k141_126689 | [full]   | 1068  | No  | NA | 0     | 0  | Not-determined | Genome-fragment | NA              | 0     | 0     |
| S11-final-viral-combined_k141_44034  | [full]   | 1979  | No  | NA | 0     | 0  | Not-determined | Genome-fragment | NA              | 0     | 0     |
| S2_k141_43350                        |          | 1097  | No  | NA | 0     | 1  | Low-quality    | Genome-fragment | NA              | 0.98  | 0     |
| S11-final-viral-combined_k141_168389 | [full]   | 1864  | No  | NA | 0     | 0  | Not-determined | Genome-fragment | NA              | 0     | 0     |
| S11-final-viral-combined_k141_99466  | [full]   | 1287  | No  | NA | 0     | 1  | Not-determined | Genome-fragment | NA              | 0     | 0     |
| S11-final-viral-combined_k141_264551 | [full]   | 2864  | No  | NA | 0     | 0  | Not-determined | Genome-fragment | NA              | 0     | 0     |
| S6_k141_48634                        |          | 1097  | No  | NA | 2     | 0  | Low-quality    | Genome-fragment | NA              | 2.04  | 0     |
| S11-final-viral-combined_k141_44071  | [full]   | 1884  | No  | NA | 0     | 2  | Not-determined | Genome-fragment | NA              | 0     | 0     |
| S7-final-viral-combined_k141_163862  | [H2gene] | 1097  | No  | NA | 0     | 0  | Low-quality    | Genome-fragment | NA              | 2.65  | 0     |
| S17-final-viral-combined_k141_58415  | [H2gene] | 1097  | No  | NA | 0     | 0  | Low-quality    | Genome-fragment | NA              | 2.82  | 0     |
| S12_k141_236282                      |          | 1097  | No  | NA | 0     | 1  | Low-quality    | Genome-fragment | NA              | 1.89  | 0     |
| S11-final-viral-combined_k141_44125  | [full]   | 3365  | No  | NA | 0     | 2  | Not-determined | Genome-fragment | NA              | 0     | 0     |
| S11-final-viral-combined_k141_126781 | [full]   | 2606  | No  | NA | 0     | 0  | Not-determined | Genome-fragment | NA              | 0     | 0     |
| S2-final-viral-combined_k141_46522   | [H2gene] | 1097  | No  | NA | 1     | 0  | Low-quality    | Genome-fragment | NA              | 2.23  | 0     |
| S2-final-viral-combined_k141_216099  | [H2gene] | 1097  | No  | NA | 1     | 0  | Low-quality    | Genome-fragment | NA              | 2.73  | 0     |
| S11-final-viral-combined_k141_154394 | [full]   | 1445  | No  | NA | 0     | 2  | Not-determined | Genome-fragment | NA              | 0     | 0     |
| S8-final-viral-combined_k141_200201  | [H2gene] |       |     |    |       |    |                |                 |                 |       |       |



|                                      |         |       |     |     |    |    |                |                 |       |       |
|--------------------------------------|---------|-------|-----|-----|----|----|----------------|-----------------|-------|-------|
| S12-final-viral-combined_k141_323559 | [H2gene | 1099  | No  | NA  | 1  | 0  | Low-quality    | Genome-fragment | 2.41  | 0     |
| S2-final-viral-combined_k141_35171   | [H2gene | 1099  | No  | NA  | 0  | 0  | Low-quality    | Genome-fragment | 2.74  | 0     |
| S11-final-viral-combined_k141_306508 | [Full   | 3742  | No  | NA  | 0  | 0  | Not-determined | Genome-fragment | NA    | 0     |
| S11-final-viral-combined_k141_30534  | [Full   | 1796  | No  | NA  | 0  | 0  | Not-determined | Genome-fragment | NA    | 0     |
| S11-final-viral-combined_k141_30538  | [Full   | 1441  | No  | NA  | 0  | 0  | Not-determined | Genome-fragment | NA    | 0     |
| S2_k141_230241                       | [Full   | 1099  | No  | NA  | 0  | 0  | Low-quality    | Genome-fragment | 1.57  | 0     |
| S2_k141_79670                        | [Full   | 1099  | No  | NA  | 0  | 0  | Low-quality    | Genome-fragment | 0.52  | 0     |
| S11-final-viral-combined_k141_237709 | [Full   | 1256  | No  | NA  | 0  | 0  | Not-determined | Genome-fragment | NA    | 0     |
| S4-final-viral-combined_k141_21354   | [H2gene | 1099  | No  | NA  | 0  | 0  | Low-quality    | Genome-fragment | 1.48  | 0     |
| S11-final-viral-combined_k141_99757  | [Full   | 15586 | No  | NA  | 1  | 13 | Not-determined | Genome-fragment | NA    | 0     |
| S11-final-viral-combined_k141_99758  | [Full   | 1109  | No  | NA  | 0  | 1  | Not-determined | Genome-fragment | NA    | 0     |
| S6-final-viral-combined_k141_56731   | [Full   | 1099  | No  | NA  | 0  | 0  | Low-quality    | Genome-fragment | 1.98  | 0     |
| S8-final-viral-combined_k141_25523   | [H2gene | 1099  | No  | NA  | 0  | 0  | Low-quality    | Genome-fragment | 1.55  | 0     |
| S11-final-viral-combined_k141_30567  | [Full   | 1946  | No  | NA  | 0  | 2  | Not-determined | Genome-fragment | NA    | 0     |
| S8-final-viral-combined_k141_132763  | [H2gene | 1099  | No  | NA  | 1  | 0  | Low-quality    | Genome-fragment | 1.23  | 0     |
| S11-final-viral-combined_k141_34683  | [Full   | 4207  | No  | NA  | 0  | 4  | Not-determined | Genome-fragment | NA    | 0     |
| S11-final-viral-combined_k141_99763  | [Full   | 3416  | No  | NA  | 0  | 0  | Not-determined | Genome-fragment | NA    | 0     |
| S3_k141_55342                        | [Full   | 1100  | No  | NA  | 0  | 0  | Low-quality    | Genome-fragment | 2.37  | 0     |
| S11-final-viral-combined_k141_210173 | [Full   | 2708  | No  | NA  | 0  | 2  | Not-determined | Genome-fragment | NA    | 0     |
| S11-final-viral-combined_k141_210183 | [Full   | 1568  | No  | NA  | 0  | 1  | Not-determined | Genome-fragment | NA    | 0     |
| S5-final-viral-combined_k141_206150  | [Full   | 1100  | No  | NA  | 0  | 1  | Low-quality    | Genome-fragment | 1.57  | 0     |
| S5-final-viral-combined_k141_38691   | [Full   | 1100  | No  | NA  | 0  | 0  | Low-quality    | Genome-fragment | 2.44  | 0     |
| S5_k141_106412                       | [Full   | 1100  | No  | NA  | 1  | 0  | Low-quality    | Genome-fragment | 0.74  | 0     |
| S11-final-viral-combined_k141_237759 | [Full   | 3709  | No  | NA  | 0  | 3  | Not-determined | Genome-fragment | NA    | 0     |
| S7-final-viral-combined_k141_120762  | [Full   | 1100  | No  | NA  | 0  | 0  | Low-quality    | Genome-fragment | 2.35  | 0     |
| S17-final-viral-combined_k141_81698  | [Full   | 1100  | No  | NA  | 0  | 0  | Low-quality    | Genome-fragment | 1.83  | 0     |
| S11-final-viral-combined_k141_292215 | [Full   | 1036  | No  | NA  | 0  | 1  | Not-determined | Genome-fragment | NA    | 0     |
| S11-final-viral-combined_k141_168794 | [Full   | 2853  | No  | NA  | 0  | 2  | Not-determined | Genome-fragment | NA    | 0     |
| S11-final-viral-combined_k141_154801 | [Full   | 2012  | No  | NA  | 0  | 0  | Not-determined | Genome-fragment | NA    | 0     |
| S11-final-viral-combined_k141_58538  | [Full   | 35663 | No  | NA  | 19 | 1  | Medium-quality | Genome-fragment | 68.08 | 0     |
| S17-final-viral-combined_k141_140852 | [Full   | 1100  | No  | NA  | 0  | 2  | Low-quality    | Genome-fragment | 1.4   | 0     |
| S17-final-viral-combined_k141_213051 | [H2gene | 1100  | No  | NA  | 0  | 0  | Low-quality    | Genome-fragment | 1.77  | 0     |
| S11-final-viral-combined_k141_251133 | [Full   | 1404  | No  | NA  | 0  | 2  | Not-determined | Genome-fragment | NA    | 0     |
| S11-final-viral-combined_k141_279015 | [Full   | 1557  | No  | NA  | 0  | 2  | Not-determined | Genome-fragment | NA    | 0     |
| S17_k141_141849                      | [Full   | 1100  | No  | NA  | 0  | 0  | Low-quality    | Genome-fragment | 2.17  | 0     |
| S11-final-viral-combined_k141_264960 | [Full   | 1323  | No  | NA  | 0  | 2  | Not-determined | Genome-fragment | NA    | 0     |
| S12-final-viral-combined_k141_188251 | [Full   | 1100  | No  | NA  | 1  | 0  | Low-quality    | Genome-fragment | 2.58  | 0     |
| S11-final-viral-combined_k141_31711  | [Full   | 1639  | No  | NA  | 0  | 2  | Not-determined | Genome-fragment | NA    | 0     |
| S12-final-viral-combined_k141_270434 | [Full   | 1100  | No  | NA  | 0  | 1  | Low-quality    | Genome-fragment | 1.31  | 0     |
| S12-final-viral-combined_k141_213960 | [Full   | 1100  | No  | NA  | 0  | 0  | Low-quality    | Genome-fragment | 0.64  | 0     |
| S11-final-viral-combined_k141_71617  | [Full   | 1489  | No  | NA  | 0  | 1  | Not-determined | Genome-fragment | NA    | 0     |
| S11-final-viral-combined_k141_16821  | [Full   | 2856  | No  | NA  | 0  | 0  | Not-determined | Genome-fragment | NA    | 0     |
| S11-final-viral-combined_k141_195895 | [Full   | 3898  | No  | NA  | 0  | 0  | Not-determined | Genome-fragment | NA    | 0     |
| S11-final-viral-combined_k141_127152 | [Full   | 1173  | No  | NA  | 0  | 0  | Not-determined | Genome-fragment | NA    | 0     |
| S4-final-viral-combined_k141_118932  | [Full   | 1100  | No  | NA  | 0  | 1  | Low-quality    | Genome-fragment | 0.66  | 0     |
| S4-final-viral-combined_k141_59341   | [H2gene | 1100  | No  | NA  | 2  | 0  | Low-quality    | Genome-fragment | 3.68  | 0     |
| S11-final-viral-combined_k141_319717 | [Full   | 1902  | No  | NA  | 0  | 1  | Not-determined | Genome-fragment | NA    | 0     |
| S11-final-viral-combined_k141_168886 | [Full   | 3414  | No  | NA  | 0  | 2  | Not-determined | Genome-fragment | NA    | 0     |
| S4_k141_137683                       | [Full   | 1100  | No  | NA  | 1  | 0  | Low-quality    | Genome-fragment | 0.42  | 0     |
| S6-final-viral-combined_k141_123476  | [Full   | 1100  | No  | NA  | 0  | 0  | Low-quality    | Genome-fragment | 1.28  | 0     |
| S8_k141_273751                       | [Full   | 1100  | No  | NA  | 0  | 0  | Low-quality    | Genome-fragment | 1.17  | 0     |
| S11-final-viral-combined_k141_168894 | [Full   | 1469  | No  | NA  | 0  | 0  | Not-determined | Genome-fragment | NA    | 0     |
| S1-final-viral-combined_k141_191475  | [Full   | 1101  | No  | NA  | 1  | 0  | Low-quality    | Genome-fragment | 2.24  | 0     |
| S11-final-viral-combined_k141_195935 | [Full   | 2459  | No  | NA  | 0  | 0  | Not-determined | Genome-fragment | NA    | 0     |
| S5-final-viral-combined_k141_158022  | [H2gene | 1101  | No  | NA  | 1  | 0  | Low-quality    | Genome-fragment | 2.52  | 0     |
| S1_k141_275097                       | [Full   | 1101  | No  | NA  | 0  | 0  | Low-quality    | Genome-fragment | 2.8   | 0     |
| S7-final-viral-combined_k141_185762  | [H2gene | 1101  | No  | NA  | 1  | 0  | Low-quality    | Genome-fragment | 2.72  | 0     |
| S11-final-viral-combined_k141_319774 | [Full   | 1705  | No  | NA  | 0  | 2  | Not-determined | Genome-fragment | NA    | 0     |
| S17-final-viral-combined_k141_155021 | [Full   | 1101  | No  | NA  | 0  | 2  | Low-quality    | Genome-fragment | 2.51  | 0     |
| S11-final-viral-combined_k141_99916  | [Full   | 3504  | No  | NA  | 0  | 0  | Not-determined | Genome-fragment | NA    | 0     |
| S12-final-viral-combined_k141_116057 | [Full   | 1101  | No  | NA  | 0  | 2  | Low-quality    | Genome-fragment | 2.31  | 0     |
| S2-final-viral-combined_k141_101010  | [Full   | 1101  | No  | NA  | 0  | 0  | Low-quality    | Genome-fragment | 2.24  | 0     |
| S6-final-viral-combined_k141_84259   | [Full   | 1101  | No  | NA  | 0  | 1  | Low-quality    | Genome-fragment | 1.59  | 0     |
| S6-final-viral-combined_k141_92039   | [Full   | 1101  | No  | NA  | 0  | 1  | Low-quality    | Genome-fragment | 1.27  | 0     |
| S11-final-viral-combined_k141_58607  | [Full   | 1644  | No  | NA  | 0  | 2  | Not-determined | Genome-fragment | NA    | 0     |
| S11-final-viral-combined_k141_279160 | [Full   | 3143  | No  | NA  | 0  | 1  | Not-determined | Genome-fragment | NA    | 0     |
| S6-final-viral-combined_k141_121166  | [Full   | 1101  | No  | NA  | 0  | 0  | Low-quality    | Genome-fragment | 2.68  | 0     |
| S11-final-viral-combined_k141_127241 | [Full   | 3269  | No  | NA  | 0  | 1  | Not-determined | Genome-fragment | NA    | 0     |
| S8-final-viral-combined_k141_224221  | [H2gene | 1101  | No  | NA  | 0  | 0  | Low-quality    | Genome-fragment | 1.03  | 0     |
| S11-final-viral-combined_k141_155656 | [H2gene | 1102  | No  | NA  | 0  | 1  | Low-quality    | Genome-fragment | 1.2   | 0     |
| S11-final-viral-combined_k141_210192 | [Full   | 1368  | No  | NA  | 0  | 1  | Not-determined | Genome-fragment | NA    | 0     |
| S11-final-viral-combined_k141_237896 | [Full   | 7215  | No  | NA  | 0  | 1  | Not-determined | Genome-fragment | NA    | 0     |
| S11-final-viral-combined_k141_306746 | [Full   | 1397  | No  | NA  | 0  | 1  | Not-determined | Genome-fragment | NA    | 0     |
| S11-final-viral-combined_k141_196003 | [Full   | 25024 | No  | NA  | 0  | 16 | Not-determined | Genome-fragment | NA    | 0     |
| S11-final-viral-combined_k141_237902 | [Full   | 2721  | No  | NA  | 0  | 2  | Not-determined | Genome-fragment | NA    | 0     |
| S11-final-viral-combined_k141_30808  | [Full   | 2259  | No  | NA  | 0  | 0  | Not-determined | Genome-fragment | NA    | 0     |
| S11-final-viral-combined_k141_265060 | [Full   | 1768  | No  | NA  | 0  | 2  | Not-determined | Genome-fragment | NA    | 0     |
| S11-final-viral-combined_k141_58622  | [Full   | 2061  | No  | NA  | 0  | 1  | Not-determined | Genome-fragment | NA    | 0     |
| S1-final-viral-combined_k141_168176  | [Full   | 1102  | No  | NA  | 0  | 2  | Low-quality    | Genome-fragment | 0.53  | 0     |
| S11-final-viral-combined_k141_154845 | [Full   | 25037 | No  | NA  | 22 | 0  | Medium-quality | Genome-fragment | 84.36 | 0     |
| S3_k141_89452                        | [Full   | 1102  | No  | NA  | 0  | 0  | Low-quality    | Genome-fragment | 0.93  | 0     |
| S7-final-viral-combined_k141_138383  | [Full   | 1102  | No  | NA  | 1  | 0  | Low-quality    | Genome-fragment | 2.9   | 0     |
| S11-final-viral-combined_k141_279215 | [Full   | 7111  | No  | NA  | 0  | 5  | Not-determined | Genome-fragment | NA    | 0     |
| S11-final-viral-combined_k141_237940 | [Full   | 3000  | No  | NA  | 0  | 0  | Not-determined | Genome-fragment | NA    | 0     |
| S11-final-viral-combined_k141_154673 | [Full   | 2638  | No  | NA  | 0  | 0  | Not-determined | Genome-fragment | NA    | 0     |
| S7-final-viral-combined_k141_109828  | [Full   | 1102  | No  | NA  | 0  | 0  | Low-quality    | Genome-fragment | 2.46  | 0     |
| S11-final-viral-combined_k141_306804 | [Full   | 3154  | No  | NA  | 0  | 0  | Not-determined | Genome-fragment | NA    | 0     |
| S11-final-viral-combined_k141_100032 | [Full   | 1272  | No  | NA  | 0  | 0  | Not-determined | Genome-fragment | NA    | 0     |
| S11-final-viral-combined_k141_85531  | [Full   | 2144  | No  | NA  | 0  | 2  | Not-determined | Genome-fragment | NA    | 0     |
| S11-final-viral-combined_k141_100035 | [Full   | 1369  | No  | NA  | 0  | 1  | Not-determined | Genome-fragment | NA    | 0     |
| S7_k141_213637                       | [Full   | 1102  | No  | NA  | 0  | 1  | Low-quality    | Genome-fragment | 2.21  | 0     |
| S17-final-viral-combined_k141_51777  | [Full   | 1102  | No  | NA  | 0  | 2  | Low-quality    | Genome-fragment | 2.18  | 0     |
| S17-final-viral-combined_k141_252406 | [Full   | 1102  | No  | NA  | 0  | 1  | Low-quality    | Genome-fragment | 1.55  | 0     |
| S11-final-viral-combined_k141_279251 | [Full   | 2228  | No  | NA  | 0  | 2  | Not-determined | Genome-fragment | NA    | 0     |
| S11-final-viral-combined_k141_154907 | [Full   | 1422  | No  | NA  | 0  | 0  | Not-determined | Genome-fragment | NA    | 0     |
| S12_k141_189259                      | [Full   | 1102  | No  | NA  | 0  | 0  | Low-quality    | Genome-fragment | 2.11  | 0     |
| S11-final-viral-combined_k141_279272 | [Full   | 8112  | No  | NA  | 0  | 4  | Not-determined | Genome-fragment | NA    | 0     |
| S11-final-viral-combined_k141_319895 | [Full   | 2995  | No  | NA  | 0  | 1  | Not-determined | Genome-fragment | NA    | 0     |
| S12_k141_284395                      | [Full   | 1102  | No  | NA  | 0  | 0  | Low-quality    | Genome-fragment | 16    | 0     |
| S11-final-viral-combined_k141_100079 | [Full   | 7099  | No  | NA  | 0  | 5  | Not-determined | Genome-fragment | NA    | 0     |
| S2_k141_215476                       | [Full   | 1102  | No  | NA  | 0  | 0  | Low-quality    | Genome-fragment | 3.34  | 0     |
| S11-final-viral-combined_k141_265141 | [Full   | 2616  | No  | NA  | 0  | 1  | Not-determined | Genome-fragment | NA    | 0     |
| S6-final-viral-combined_k141_91275   | [Full   | 1102  | No  | NA  | 0  | 0  | Low-quality    | Genome-fragment | 1.74  | 0     |
| S11-final-viral-combined_k141_100091 | [Full   | 5189  | No  | NA  | 0  | 4  | Not-determined | Genome-fragment | NA    | 0     |
| S8-final-viral-combined_k141_219217  | [Full   | 1102  | No  | NA  | 0  | 1  | Low-quality    | Genome-fragment | 1.96  | 0     |
| S8-final-viral-combined_k141_225844  | [H2gene | 1102  | No  | NA  | 1  | 0  | Low-quality    | Genome-fragment | 2.53  | 0     |
| S9-final-viral-combined_k141_51973   | [Full   | 1103  | No  | NA  | 1  | 0  | Low-quality    | Genome-fragment | 1.36  | 0     |
| S11-final-viral-combined_k141_198523 | [Full   | 1103  | No  | NA  | 0  | 0  | Low-quality    | Genome-fragment | 0.73  | 0     |
| S11-final-viral-combined_k141_141082 | [Full   | 1695  | No  | NA  | 0  | 1  | Not-determined | Genome-fragment | NA    | 0     |
| S11-final-viral-combined_k141_30888  | [Full   | 2978  | No  | NA  | 0  | 3  | Not-determined | Genome-fragment | NA    | 0     |
| S11-final-viral-combined_k141_154976 | [Full   | 1699  | No  | NA  | 0  | 2  | Not-determined | Genome-fragment | NA    | 0     |
| S11-final-viral-combined_k141_100124 | [Full   | 2476  | No  | NA  | 0  | 0  | Not-determined | Genome-fragment | NA    | 0     |
| S11-final-viral-combined_k141_7191   | [Full   | 1103  | No  | NA  | 0  | 3  | Low-quality    | Genome-fragment | 0.84  | 0     |
| S11-final-viral-combined_k141_3381   | [Full   | 6826  | No  | NA  | 0  | 3  | Not-determined | Genome-fragment | NA    | 0     |
| S11-final-viral-combined_k141_17029  | [Full   | 30219 | No  | NA  | 5  | 1  | Medium-quality | Genome-fragment | 54.28 | 0     |
| S1_k141_234796                       | [Full   | 1103  | No  | NA  | 0  | 0  | Low-quality    | Genome-fragment | 2.58  | 0     |
| S5-final-viral-combined_k141_169196  | [Full   | 1103  | No  | NA  | 1  | 0  | Low-quality    | Genome-fragment | 0.52  | 0     |
| S5-final-viral-combined_k141_20205   | [H2gene | 1103  | No  | NA  | 2  | 0  | Low-quality    | Genome-fragment | 2.17  | 0     |
| S11-final-viral-combined_k141_127377 | [Full   | 2000  | No  | NA  | 0  | 2  | Not-determined | Genome-fragment | NA    | 0     |
| S7-final-viral-combined_k141_80103   | [H2gene | 1103  | No  | NA  | 1  | 0  | Low-quality    | Genome-fragment | 1.86  | 0     |
| S11-final-viral-combined_k141_292437 | [Full   | 1860  | No  | NA  | 0  | 1  | Not-determined | Genome-fragment | NA    | 0     |
| S11-final-viral-combined_k141_320010 | [Full   | 8510  | No  | NA  | 0  | 0  | Not-determined | Genome-fragment | NA    | 0     |
| S11-final-viral-combined_k141_44721  | [Full   | 2058  | No  | NA  | 0  | 2  | Not-determined | Genome-fragment | NA    | 0     |
| S11-final-viral-combined_k141_210369 | [Full   | 6782  | No  | NA  | 0  | 3  | Not-determined | Genome-fragment | NA    | 0     |
| S11-final-viral-combined_k141_100171 | [Full   | 5209  | No  | NA  | 0  | 5  | Not-determined | Genome-fragment | NA    | 0     |
| S7_k141_20925                        | [Full   | 1103  | Yes | 617 | 1  | 1  | Low-quality    | Genome-fragment | 1.52  | 44.06 |
| S11-final-viral-combined_k141_306971 | [Full   | 2249  | No  | NA  | 0  | 1  | Not-determined | Genome-fragment | NA    | 0     |
| S12_k141_167148                      | [Full   | 1103  | No  | NA  | 1  | 1  | Low-quality    | Genome-fragment | 0.19  | 0     |
| S3-final-viral-combined_k141_23875   | [Full   | 1104  | No  | NA  | 1  | 0  | Low-quality    | Genome-fragment |       |       |



|                                              |       |     |    |   |    |                |                 |      |      |
|----------------------------------------------|-------|-----|----|---|----|----------------|-----------------|------|------|
| S1-final-viral-combined_k141_1470091  H2gene | 1105  | No  | NA | 1 | 0  | Low-quality    | Genome-fragment | 3.02 | 0    |
| S11-final-viral-combined_k141_224261  H2gene | 1252  | No  | NA | 0 | 0  | Not-determined | Genome-fragment | NA   | 0    |
| S11-final-viral-combined_k141_196187  H2gene | 2285  | No  | NA | 0 | 0  | Not-determined | Genome-fragment | NA   | 0    |
| S1_k141_314062                               | 1105  | No  | NA | 0 | 2  | Low-quality    | Genome-fragment | 0.35 | 0    |
| S1_k141_134101                               | 1105  | No  | NA | 0 | 1  | Low-quality    | Genome-fragment | 2.47 | 0    |
| S11-final-viral-combined_k141_449771  H2gene | 14515 | No  | NA | 0 | 6  | Not-determined | Genome-fragment | NA   | 0    |
| S11-final-viral-combined_k141_86440  H2gene  | 1117  | No  | NA | 0 | 1  | Not-determined | Genome-fragment | NA   | 0    |
| S11-final-viral-combined_k141_279539  H2gene | 4149  | No  | NA | 0 | 3  | Not-determined | Genome-fragment | NA   | 0    |
| S11-final-viral-combined_k141_210551  H2gene | 1658  | No  | NA | 0 | 2  | Not-determined | Genome-fragment | NA   | 0    |
| S11-final-viral-combined_k141_141351  H2gene | 4306  | No  | NA | 0 | 6  | Not-determined | Genome-fragment | NA   | 0    |
| S3-final-viral-combined_k141_158832  H2gene  | 1105  | No  | NA | 0 | 0  | Low-quality    | Genome-fragment | 2.03 | 0    |
| S11-final-viral-combined_k141_230261  H2gene | 1154  | No  | NA | 0 | 0  | Not-determined | Genome-fragment | NA   | 0    |
| S5-final-viral-combined_k141_205106  H2gene  | 1105  | No  | NA | 2 | 0  | Low-quality    | Genome-fragment | 2.38 | 0    |
| S5-final-viral-combined_k141_173360  H2gene  | 1105  | No  | NA | 2 | 0  | Low-quality    | Genome-fragment | 1.34 | 0    |
| S12-final-viral-combined_k141_80405  H2gene  | 1105  | No  | NA | 1 | 0  | Low-quality    | Genome-fragment | 1.68 | 0    |
| S11-final-viral-combined_k141_210668  H2gene | 7311  | No  | NA | 0 | 3  | Not-determined | Genome-fragment | NA   | 0    |
| S12-final-viral-combined_k141_50052  H2gene  | 1105  | No  | NA | 0 | 0  | Low-quality    | Genome-fragment | 1.49 | 0    |
| S12-final-viral-combined_k141_158420  H2gene | 1105  | No  | NA | 1 | 0  | Low-quality    | Genome-fragment | 1.97 | 0    |
| S11-final-viral-combined_k141_100491  H2gene | 1572  | No  | NA | 0 | 0  | Not-determined | Genome-fragment | NA   | 0    |
| S2-final-viral-combined_k141_23562  H2gene   | 1105  | No  | NA | 1 | 0  | Low-quality    | Genome-fragment | 1.71 | 0    |
| S6-final-viral-combined_k141_111708  H2gene  | 1105  | No  | NA | 0 | 0  | Low-quality    | Genome-fragment | 0.64 | 0    |
| S11-final-viral-combined_k141_196221  H2gene | 3954  | No  | NA | 0 | 1  | Not-determined | Genome-fragment | NA   | 0    |
| S8-final-viral-combined_k141_118713  H2gene  | 1105  | No  | NA | 0 | 0  | Low-quality    | Genome-fragment | 0.99 | 0    |
| S11-final-viral-combined_k141_182785  H2gene | 4590  | No  | NA | 0 | 1  | Not-determined | Genome-fragment | NA   | 0    |
| S8-final-viral-combined_k141_814071  H2gene  | 1105  | No  | NA | 1 | 0  | Low-quality    | Genome-fragment | 1.27 | 0    |
| S11-final-viral-combined_k141_101819  H2gene | 1105  | No  | NA | 1 | 0  | Low-quality    | Genome-fragment | 1.02 | 0    |
| S11-final-viral-combined_k141_279617  H2gene | 2506  | No  | NA | 0 | 2  | Not-determined | Genome-fragment | NA   | 0    |
| S11-final-viral-combined_k141_141366  H2gene | 1487  | No  | NA | 0 | 0  | Not-determined | Genome-fragment | NA   | 0    |
| S11-final-viral-combined_k141_141367  H2gene | 1212  | No  | NA | 0 | 0  | Not-determined | Genome-fragment | NA   | 0    |
| S11-final-viral-combined_k141_127635  H2gene | 2045  | No  | NA | 0 | 2  | Not-determined | Genome-fragment | NA   | 0    |
| S11-final-viral-combined_k141_35891  H2gene  | 25278 | No  | NA | 0 | 15 | Not-determined | Genome-fragment | NA   | 0    |
| S11-final-viral-combined_k141_123814  H2gene | 1105  | No  | NA | 0 | 0  | Low-quality    | Genome-fragment | 3.11 | 0    |
| S11-final-viral-combined_k141_210725  H2gene | 4802  | No  | NA | 1 | 2  | Not-determined | Genome-fragment | NA   | 0    |
| S1_k141_37854                                | 1106  | No  | NA | 0 | 0  | Low-quality    | Genome-fragment | 0.63 | 0    |
| S11-final-viral-combined_k141_141402  H2gene | 2618  | No  | NA | 0 | 1  | Not-determined | Genome-fragment | NA   | 0    |
| S11-final-viral-combined_k141_292874  H2gene | 15093 | No  | NA | 0 | 0  | Not-determined | Genome-fragment | NA   | 0    |
| S11-final-viral-combined_k141_141417  H2gene | 1948  | No  | NA | 0 | 2  | Not-determined | Genome-fragment | NA   | 0    |
| S11-final-viral-combined_k141_279651  H2gene | 2028  | No  | NA | 0 | 1  | Not-determined | Genome-fragment | NA   | 0    |
| S1_k141_338709                               | 1106  | No  | NA | 0 | 1  | Low-quality    | Genome-fragment | 2.42 | 0    |
| S3-final-viral-combined_k141_134633  H2gene  | 1106  | No  | NA | 1 | 0  | Low-quality    | Genome-fragment | 1.78 | 0    |
| S7_k141_189616                               | 1106  | No  | NA | 0 | 0  | Low-quality    | Genome-fragment | 1.05 | 0    |
| S11-final-viral-combined_k141_113444  H2gene | 4616  | No  | NA | 0 | 3  | Not-determined | Genome-fragment | NA   | 0    |
| S12-final-viral-combined_k141_65313  H2gene  | 1106  | No  | NA | 2 | 0  | Low-quality    | Genome-fragment | 2.73 | 0    |
| S11-final-viral-combined_k141_113448  H2gene | 6419  | No  | NA | 0 | 1  | Not-determined | Genome-fragment | NA   | 0    |
| S11-final-viral-combined_k141_865871  H2gene | 5982  | No  | NA | 0 | 3  | Not-determined | Genome-fragment | NA   | 0    |
| S12-final-viral-combined_k141_378751  H2gene | 1106  | No  | NA | 0 | 0  | Low-quality    | Genome-fragment | 2.45 | 0    |
| S11-final-viral-combined_k141_155350  H2gene | 1383  | No  | NA | 0 | 0  | Not-determined | Genome-fragment | NA   | 0    |
| S12_k141_271250                              | 1106  | No  | NA | 0 | 0  | Low-quality    | Genome-fragment | 1.05 | 0    |
| S11-final-viral-combined_k141_127706  H2gene | 1152  | No  | NA | 0 | 1  | Not-determined | Genome-fragment | NA   | 0    |
| S11-final-viral-combined_k141_265453  H2gene | 4483  | No  | NA | 1 | 0  | High-quality   | Genome-fragment | 100  | 0    |
| S11-final-viral-combined_k141_320409  H2gene | 2418  | No  | NA | 0 | 1  | Not-determined | Genome-fragment | NA   | 0    |
| S11-final-viral-combined_k141_143474  H2gene | 2328  | No  | NA | 0 | 0  | Not-determined | Genome-fragment | NA   | 0    |
| S12_k141_125715                              | 1106  | No  | NA | 0 | 0  | Low-quality    | Genome-fragment | 1.8  | 0    |
| S11-final-viral-combined_k141_155379  H2gene | 1244  | No  | NA | 0 | 1  | Not-determined | Genome-fragment | NA   | 0    |
| S2-final-viral-combined_k141_171994  H2gene  | 1106  | No  | NA | 0 | 1  | Low-quality    | Genome-fragment | 1.47 | 0    |
| S6_k141_124383                               | 1106  | No  | NA | 0 | 1  | Low-quality    | Genome-fragment | 0.41 | 0    |
| S8-final-viral-combined_k141_235206  H2gene  | 1106  | No  | NA | 1 | 0  | Low-quality    | Genome-fragment | 2.8  | 0    |
| S8-final-viral-combined_k141_205201  H2gene  | 1106  | No  | NA | 0 | 1  | Low-quality    | Genome-fragment | 0.69 | 0    |
| S11-final-viral-combined_k141_265511  H2gene | 1870  | No  | NA | 0 | 0  | Not-determined | Genome-fragment | NA   | 0    |
| S11-final-viral-combined_k141_155429  H2gene | 2755  | No  | NA | 0 | 4  | Not-determined | Genome-fragment | NA   | 0    |
| S11-final-viral-combined_k141_36921  H2gene  | 7314  | No  | NA | 0 | 4  | Not-determined | Genome-fragment | NA   | 0    |
| S9-final-viral-combined_k141_103096  H2gene  | 1107  | No  | NA | 0 | 0  | Low-quality    | Genome-fragment | 3.02 | 0    |
| S11-final-viral-combined_k141_31984  H2gene  | 1107  | No  | NA | 2 | 0  | Low-quality    | Genome-fragment | 1.97 | 0    |
| S1_k141_269605                               | 1107  | No  | NA | 0 | 1  | Low-quality    | Genome-fragment | 0.31 | 0    |
| S11-final-viral-combined_k141_86699  H2gene  | 1544  | No  | NA | 0 | 1  | Not-determined | Genome-fragment | NA   | 0    |
| S11-final-viral-combined_k141_341550  H2gene | 1770  | No  | NA | 0 | 1  | Not-determined | Genome-fragment | NA   | 0    |
| S3_k141_100439                               | 1107  | Yes | NA | 1 | 1  | Low-quality    | Genome-fragment | 0.24 | 53.3 |
| S7-final-viral-combined_k141_127462  H2gene  | 1107  | No  | NA | 2 | 0  | Low-quality    | Genome-fragment | 2.33 | 0    |
| S7_k141_102034                               | 1107  | No  | NA | 0 | 0  | Low-quality    | Genome-fragment | 1.04 | 0    |
| S11-final-viral-combined_k141_141573  H2gene | 1900  | No  | NA | 0 | 3  | Not-determined | Genome-fragment | NA   | 0    |
| S17-final-viral-combined_k141_160582  H2gene | 1107  | No  | NA | 0 | 0  | Low-quality    | Genome-fragment | 2.04 | 0    |
| S12-final-viral-combined_k141_122871  H2gene | 1107  | No  | NA | 0 | 0  | Low-quality    | Genome-fragment | 3.91 | 0    |
| S12-final-viral-combined_k141_224893  H2gene | 1107  | No  | NA | 0 | 0  | Low-quality    | Genome-fragment | 0.49 | 0    |
| S12-final-viral-combined_k141_208239  H2gene | 1107  | No  | NA | 1 | 0  | Low-quality    | Genome-fragment | 3.23 | 0    |
| S12_k141_371686                              | 1107  | No  | NA | 1 | 0  | Low-quality    | Genome-fragment | 0.61 | 0    |
| S2-final-viral-combined_k141_244626  H2gene  | 1107  | No  | NA | 1 | 0  | Low-quality    | Genome-fragment | 2.38 | 0    |
| S11-final-viral-combined_k141_86725  H2gene  | 3391  | No  | NA | 0 | 1  | Not-determined | Genome-fragment | NA   | 0    |
| S4-final-viral-combined_k141_121387  H2gene  | 1107  | No  | NA | 0 | 1  | Low-quality    | Genome-fragment | 0.6  | 0    |
| S9-final-viral-combined_k141_71606  H2gene   | 1108  | No  | NA | 0 | 0  | Low-quality    | Genome-fragment | 1.36 | 0    |
| S11-final-viral-combined_k141_293050  H2gene | 1160  | No  | NA | 0 | 3  | Not-determined | Genome-fragment | NA   | 0    |
| S11-final-viral-combined_k141_278848  H2gene | 1012  | No  | NA | 0 | 1  | Not-determined | Genome-fragment | NA   | 0    |
| S11-final-viral-combined_k141_155521  H2gene | 3228  | No  | NA | 0 | 0  | Not-determined | Genome-fragment | NA   | 0    |
| S11-final-viral-combined_k141_128336  H2gene | 1108  | No  | NA | 0 | 0  | Low-quality    | Genome-fragment | 2.22 | 0    |
| S11-final-viral-combined_k141_313771  H2gene | 2221  | No  | NA | 0 | 3  | Not-determined | Genome-fragment | NA   | 0    |
| S11-final-viral-combined_k141_279870  H2gene | 1116  | No  | NA | 0 | 1  | Not-determined | Genome-fragment | NA   | 0    |
| S11-final-viral-combined_k141_155555  H2gene | 1946  | No  | NA | 0 | 1  | Not-determined | Genome-fragment | NA   | 0    |
| S11-final-viral-combined_k141_224464  H2gene | 2882  | No  | NA | 0 | 3  | Not-determined | Genome-fragment | NA   | 0    |
| S11-final-viral-combined_k141_59289  H2gene  | 2632  | No  | NA | 0 | 1  | Not-determined | Genome-fragment | NA   | 0    |
| S11-final-viral-combined_k141_261821  H2gene | 1108  | No  | NA | 0 | 1  | Low-quality    | Genome-fragment | 1.65 | 0    |
| S11-final-viral-combined_k141_174281  H2gene | 1254  | No  | NA | 0 | 0  | Not-determined | Genome-fragment | NA   | 0    |
| S11-final-viral-combined_k141_196476  H2gene | 1552  | No  | NA | 0 | 2  | Not-determined | Genome-fragment | NA   | 0    |
| S11-final-viral-combined_k141_291131  H2gene | 3673  | No  | NA | 0 | 2  | Not-determined | Genome-fragment | NA   | 0    |
| S11-final-viral-combined_k141_59151  H2gene  | 1446  | No  | NA | 0 | 1  | Not-determined | Genome-fragment | NA   | 0    |
| S11-final-viral-combined_k141_159363  H2gene | 1108  | No  | NA | 2 | 0  | Low-quality    | Genome-fragment | 2.44 | 0    |
| S11-final-viral-combined_k141_109741  H2gene | 2012  | No  | NA | 0 | 1  | Not-determined | Genome-fragment | NA   | 0    |
| S11-final-viral-combined_k141_238424  H2gene | 1120  | No  | NA | 0 | 2  | Not-determined | Genome-fragment | NA   | 0    |
| S11-final-viral-combined_k141_320569  H2gene | 4590  | No  | NA | 0 | 1  | Not-determined | Genome-fragment | NA   | 0    |
| S11-final-viral-combined_k141_72318  H2gene  | 1930  | No  | NA | 0 | 2  | Not-determined | Genome-fragment | NA   | 0    |
| S11-final-viral-combined_k141_174481  H2gene | 319   | No  | NA | 0 | 0  | Not-determined | Genome-fragment | NA   | 0    |
| S5-final-viral-combined_k141_942351  H2gene  | 1108  | No  | NA | 1 | 0  | Low-quality    | Genome-fragment | 2.83 | 0    |
| S5-final-viral-combined_k141_397001  H2gene  | 1108  | No  | NA | 1 | 0  | Low-quality    | Genome-fragment | 2.55 | 0    |
| S11-final-viral-combined_k141_113160  H2gene | 1309  | No  | NA | 1 | 0  | Not-determined | Genome-fragment | NA   | 0    |
| S11-final-viral-combined_k141_313991  H2gene | 1307  | No  | NA | 0 | 2  | Not-determined | Genome-fragment | NA   | 0    |
| S11-final-viral-combined_k141_86834  H2gene  | 3422  | No  | NA | 0 | 2  | Not-determined | Genome-fragment | NA   | 0    |
| S11-final-viral-combined_k141_293157  H2gene | 8579  | No  | NA | 0 | 1  | Not-determined | Genome-fragment | NA   | 0    |
| S5_k141_113537                               | 1108  | No  | NA | 0 | 0  | Low-quality    | Genome-fragment | 2.11 | 0    |
| S11-final-viral-combined_k141_127870  H2gene | 3563  | No  | NA | 0 | 5  | Not-determined | Genome-fragment | NA   | 0    |
| S11-final-viral-combined_k141_100789  H2gene | 2523  | No  | NA | 0 | 2  | Not-determined | Genome-fragment | NA   | 0    |
| S11-final-viral-combined_k141_451091  H2gene | 1551  | No  | NA | 0 | 0  | Not-determined | Genome-fragment | NA   | 0    |
| S11-final-viral-combined_k141_251870  H2gene | 5498  | No  | NA | 0 | 0  | Not-determined | Genome-fragment | NA   | 0    |
| S11-final-viral-combined_k141_320601  H2gene | 5306  | No  | NA | 0 | 1  | Not-determined | Genome-fragment | NA   | 0    |
| S7-final-viral-combined_k141_83941  H2gene   | 1108  | No  | NA | 0 | 1  | Low-quality    | Genome-fragment | 2.82 | 0    |
| S11-final-viral-combined_k141_251886  H2gene | 4078  | No  | NA | 0 | 3  | Not-determined | Genome-fragment | NA   | 0    |
| S7-final-viral-combined_k141_53633  H2gene   | 1108  | No  | NA | 1 | 0  | Low-quality    | Genome-fragment | 0.69 | 0    |
| S11-final-viral-combined_k141_224496  H2gene | 2155  | No  | NA | 0 | 0  | Not-determined | Genome-fragment | NA   | 0    |
| S17-final-viral-combined_k141_247066  H2gene | 1108  | No  | NA | 0 | 0  | Low-quality    | Genome-fragment | 5.23 | 0    |
| S17-final-viral-combined_k141_237991  H2gene | 1108  | No  | NA | 0 | 1  | Low-quality    | Genome-fragment | 0.85 | 0    |
| S11-final-viral-combined_k141_38891  H2gene  | 1371  | No  | NA | 0 | 0  | Not-determined | Genome-fragment | NA   | 0    |
| S11-final-viral-combined_k141_113605  H2gene | 1651  | No  | NA | 0 | 0  | Not-determined | Genome-fragment | NA   | 0    |
| S12_k141_302691                              | 1108  | No  | NA | 0 | 1  | Low-quality    | Genome-fragment | 0.63 | 0    |
| S11-final-viral-combined_k141_279880  H2gene | 7454  | No  | NA | 0 | 6  | Not-determined | Genome-fragment | NA   | 0    |
| S11-final-viral-combined_k141_723561  H2gene | 8745  | No  | NA | 0 | 0  | Not-determined | Genome-fragment | NA   | 0    |
| S4-final-viral-combined_k141_880551  H2gene  | 1108  | No  | NA | 0 | 0  | Low-quality    | Genome-fragment | 2.56 | 0    |
| S11-final-viral-combined_k141_115627  H2gene | 5037  | No  | NA | 0 | 2  | Not-determined | Genome-fragment | NA   | 0    |
| S11-final-viral-combined_k141_224580  H2gene | 5670  | No  | NA | 0 | 1  | Not-determined | Genome-fragment | NA   | 0    |
| S6-final-viral-combined_k141_104197  H2gene  | 1108  | No  | NA | 0 | 0  | Low-quality    | Genome-fragment | 0.71 | 0    |
| S11-final-viral-combined_k141_100782  H2gene | 3276  | No  | NA | 0 | 2  | Not-determined | Genome-fragment | NA   | 0    |
| S11-final-viral-combined_k141_280054  H2gene | 4466  | No  | NA | 0 | 3  | Not-determined | Genome-fragment | NA   | 0    |
| S11-final-viral-combined_k141_300273  H2gene | 1109  | No  | NA | 1 | 0  | Low-quality    | Genome-fragment | 2.94 | 0    |
| S11-final-viral-combined_k141_265795  H2gene | 1457  | No  | NA | 0 | 0  | Not-determined | Genome-fragment | NA   | 0    |
| S11-final-viral-combined_k141_72418  H2gene  | 6660  | No  | NA | 0 | 7  | Not-determined | Genome-fragment | NA   | 0    |
| S11-final-viral-combined_k141_841321  H2gene | 1109  | No  | NA | 2 | 0  | Low-quality    | Genome-fragment | 3.27 | 0    |
| S11-final-viral-combined_k141_16982          |       |     |    |   |    |                |                 |      |      |



|                                      |          |       |     |    |       |    |                |                 |                 |       |       |
|--------------------------------------|----------|-------|-----|----|-------|----|----------------|-----------------|-----------------|-------|-------|
| S11-final-viral-combined_k141_128090 | [full]   | 5380  | No  | NA | 0     | 1  | Not-determined | Genome-fragment | NA              | 0     |       |
| S11-final-viral-combined_k141_120710 | [full]   | 44314 | No  | NA | 0     | 7  | High-quality   | Genome-fragment | 99.26           | 0     |       |
| S7-final-viral-combined_k141_142477  | [full]   | 1110  | No  | NA | 0     | 0  | Low-quality    | Genome-fragment | 2.4             | 0     |       |
| S17-final-viral-combined_k141_240018 | [full]   | 1110  | No  | NA | 0     | 0  | Low-quality    | Genome-fragment | 2.06            | 0     |       |
| S11-final-viral-combined_k141_19445  | [full]   | 1441  | No  | NA | 0     | 0  | Not-determined | Genome-fragment | NA              | 0     |       |
| S11-final-viral-combined_k141_87174  | [full]   | 1997  | No  | NA | 0     | 0  | Not-determined | Genome-fragment | NA              | 0     |       |
| S17-final-viral-combined_k141_41741  | [H2gene] | 1110  | No  | NA | 0     | 0  | Low-quality    | Genome-fragment | 2.05            | 0     |       |
| S11-final-viral-combined_k141_19445  | [full]   | 4626  | No  | NA | 0     | 4  | Not-determined | Genome-fragment | NA              | 0     |       |
| S11-final-viral-combined_k141_29146  | [full]   | 3246  | No  | NA | 0     | 0  | Not-determined | Genome-fragment | NA              | 0     |       |
| S11-final-viral-combined_k141_224781 | [full]   | 1613  | No  | NA | 0     | 1  | Not-determined | Genome-fragment | NA              | 0     |       |
| S11-final-viral-combined_k141_196765 | [full]   | 2632  | No  | NA | 0     | 0  | Not-determined | Genome-fragment | NA              | 0     |       |
| S11-final-viral-combined_k141_4073   | [full]   | 26329 | No  | NA | 0     | 18 | Not-determined | Genome-fragment | NA              | 0     |       |
| S8-final-viral-combined_k141_166079  | [full]   | 1110  | No  | NA | 1     | 0  | Low-quality    | Genome-fragment | 2.98            | 0     |       |
| S8-final-viral-combined_k141_75485   | [full]   | 1110  | No  | NA | 0     | 0  | Low-quality    | Genome-fragment | 0.58            | 0     |       |
| S11-final-viral-combined_k141_87209  | [full]   | 1872  | No  | NA | 0     | 0  | Not-determined | Genome-fragment | NA              | 0     |       |
| S11-final-viral-combined_k141_185386 | [full]   | 2873  | No  | NA | 0     | 2  | Not-determined | Genome-fragment | NA              | 0     |       |
| S8-final-viral-combined_k141_200966  | [full]   | 1110  | No  | NA | 0     | 0  | Low-quality    | Genome-fragment | 1.78            | 0     |       |
| S9-final-viral-combined_k141_70257   | [full]   | 1111  | No  | NA | 0     | 2  | Low-quality    | Genome-fragment | 0.34            | 0     |       |
| S9-final-viral-combined_k141_21066   | [H2gene] | 1111  | No  | NA | 0     | 0  | Low-quality    | Genome-fragment | 1.85            | 0     |       |
| S11-final-viral-combined_k141_59520  | [full]   | 1269  | No  | NA | 0     | 3  | Not-determined | Genome-fragment | NA              | 0     |       |
| S9_k141_7934                         |          | 1111  | No  | NA | 0     | 0  | Low-quality    | Genome-fragment | 2.73            | 0     |       |
| S17-final-viral-combined_k141_196092 | [H2gene] | 1112  | No  | NA | 0     | 0  | Low-quality    | Genome-fragment | 2.64            | 0     |       |
| S11-final-viral-combined_k141_224831 | [full]   | 1431  | No  | NA | 0     | 1  | Not-determined | Genome-fragment | NA              | 0     |       |
| S12-final-viral-combined_k141_84515  | [full]   | 1111  | No  | NA | 2     | 0  | Low-quality    | Genome-fragment | 1.18            | 0     |       |
| S11-final-viral-combined_k141_211569 | [full]   | 2831  | No  | NA | 0     | 0  | Not-determined | Genome-fragment | NA              | 0     |       |
| S11-final-viral-combined_k141_211570 | [full]   | 1226  | No  | NA | 0     | 1  | Not-determined | Genome-fragment | NA              | 0     |       |
| S11-final-viral-combined_k141_238964 | [full]   | 3568  | No  | NA | 0     | 0  | Not-determined | Genome-fragment | NA              | 0     |       |
| S12-final-viral-combined_k141_213761 | [full]   | 1111  | No  | NA | 2     | 0  | Low-quality    | Genome-fragment | 1.38            | 0     |       |
| S11-final-viral-combined_k141_87242  | [full]   | 1783  | No  | NA | 0     | 0  | Not-determined | Genome-fragment | NA              | 0     |       |
| S4_k141_118996                       |          | 1111  | No  | NA | 0     | 1  | Low-quality    | Genome-fragment | 2.5             | 0     |       |
| S11-final-viral-combined_k141_45766  | [full]   | 1375  | No  | NA | 0     | 1  | Not-determined | Genome-fragment | NA              | 0     |       |
| S11-final-viral-combined_k141_31735  | [full]   | 1804  | No  | NA | 0     | 1  | Not-determined | Genome-fragment | NA              | 0     |       |
| S8_k141_220634                       |          | 1111  | No  | NA | 1     | 0  | Low-quality    | Genome-fragment | 1.12            | 0     |       |
| S11-final-viral-combined_k141_19002  | [full]   | 1112  | No  | NA | 0     | 1  | Low-quality    | Genome-fragment | 1.71            | 0     |       |
| S11-final-viral-combined_k141_196849 | [full]   | 1255  | No  | NA | 0     | 1  | Not-determined | Genome-fragment | NA              | 0     |       |
| S11_k141_9081                        |          | 1112  | No  | NA | 0     | 1  | Low-quality    | Genome-fragment | 1.73            | 0     |       |
| S1-final-viral-combined_k141_1801    | [full]   | 1112  | No  | NA | 0     | 0  | Low-quality    | Genome-fragment | 1.56            | 0     |       |
| S5-final-viral-combined_k141_157644  | [full]   | 1112  | No  | NA | 2     | 0  | Low-quality    | Genome-fragment | 2.3             | 0     |       |
| S5_k141_24110                        |          | 1112  | No  | NA | 2     | 0  | Low-quality    | Genome-fragment | 3.41            | 0     |       |
| S17-final-viral-combined_k141_138583 | [full]   | 1112  | No  | NA | 0     | 0  | Low-quality    | Genome-fragment | 1.62            | 0     |       |
| S17-k141_71206                       |          | 1112  | No  | NA | 0     | 0  | Low-quality    | Genome-fragment | 0.94            | 0     |       |
| S11-final-viral-combined_k141_128238 | [full]   | 1578  | No  | NA | 0     | 0  | Not-determined | Genome-fragment | NA              | 0     |       |
| S11-final-viral-combined_k141_224892 | [full]   | 3009  | No  | NA | 0     | 2  | Not-determined | Genome-fragment | NA              | 0     |       |
| S11-final-viral-combined_k141_101124 | [full]   | 2664  | No  | NA | 0     | 2  | Not-determined | Genome-fragment | NA              | 0     |       |
| S11-final-viral-combined_k141_280409 | [full]   | 5485  | No  | NA | 0     | 5  | Not-determined | Genome-fragment | NA              | 0     |       |
| S11-final-viral-combined_k141_25237  | [full]   | 1729  | No  | NA | 0     | 1  | Not-determined | Genome-fragment | NA              | 0     |       |
| S11-final-viral-combined_k141_4199   | [full]   | 2023  | No  | NA | 0     | 0  | Not-determined | Genome-fragment | NA              | 0     |       |
| S12-final-viral-combined_k141_357122 | [full]   | 1112  | No  | NA | 0     | 0  | Low-quality    | Genome-fragment | 2.23            | 0     |       |
| S11-final-viral-combined_k141_29146  | [full]   | 1292  | No  | NA | 0     | 0  | Not-determined | Genome-fragment | NA              | 0     |       |
| S11-final-viral-combined_k141_183471 | [full]   | 3734  | No  | NA | 0     | 2  | Not-determined | Genome-fragment | NA              | 0     |       |
| S12-final-viral-combined_k141_66758  | [full]   | 1112  | No  | NA | 0     | 0  | Low-quality    | Genome-fragment | 0.85            | 0     |       |
| S11-final-viral-combined_k141_23896  | [full]   | 1660  | No  | NA | 0     | 2  | Not-determined | Genome-fragment | NA              | 0     |       |
| S11-final-viral-combined_k141_59649  | [full]   | 3961  | No  | NA | 0     | 2  | Not-determined | Genome-fragment | NA              | 0     |       |
| S12_k141_320047                      |          | 1112  | No  | NA | 0     | 0  | Low-quality    | Genome-fragment | 0.98            | 0     |       |
| S4-final-viral-combined_k141_108662  | [full]   | 1112  | No  | NA | 0     | 0  | Low-quality    | Genome-fragment | 0.83            | 0     |       |
| S4-final-viral-combined_k141_18445   | [full]   | 1112  | No  | NA | 0     | 0  | Low-quality    | Genome-fragment | 1.09            | 0     |       |
| S6-final-viral-combined_k141_74577   | [full]   | 1112  | No  | NA | 1     | 0  | Low-quality    | Genome-fragment | 1.03            | 0     |       |
| S11-final-viral-combined_k141_224845 | [full]   | 3849  | No  | NA | 0     | 4  | Not-determined | Genome-fragment | NA              | 0     |       |
| S11-final-viral-combined_k141_266280 | [full]   | 1551  | No  | NA | 0     | 0  | Not-determined | Genome-fragment | NA              | 0     |       |
| S11-final-viral-combined_k141_41875  | [full]   | 1112  | No  | NA | 0     | 0  | Low-quality    | Genome-fragment | 1.36            | 0     |       |
| S11-final-viral-combined_k141_23517  | [full]   | 3082  | No  | NA | 0     | 3  | Not-determined | Genome-fragment | NA              | 0     |       |
| S8-final-viral-combined_k141_275718  | [H2gene] | 1112  | No  | NA | 0     | 0  | Low-quality    | Genome-fragment | 0.47            | 0     |       |
| S11-final-viral-combined_k141_266244 | [full]   | 1275  | No  | NA | 0     | 1  | Not-determined | Genome-fragment | NA              | 0     |       |
| S11-final-viral-combined_k141_185334 | [full]   | 2312  | No  | NA | 0     | 0  | Not-determined | Genome-fragment | NA              | 0     |       |
| S11-final-viral-combined_k141_195958 | [full]   | 2869  | No  | NA | 0     | 2  | Not-determined | Genome-fragment | NA              | 0     |       |
| S11-final-viral-combined_k141_4269   | [full]   | 1274  | No  | NA | 0     | 1  | Not-determined | Genome-fragment | NA              | 0     |       |
| S9_k141_30345                        |          | 1113  | No  | NA | 1     | 0  | Low-quality    | Genome-fragment | 3.54            | 0     |       |
| S11-final-viral-combined_k141_72737  | [full]   | 5612  | No  | NA | 0     | 5  | Not-determined | Genome-fragment | NA              | 0     |       |
| S11-final-viral-combined_k141_4274   | [full]   | 3639  | No  | NA | 0     | 1  | Not-determined | Genome-fragment | NA              | 0     |       |
| S11-final-viral-combined_k141_17703  | [full]   | 1967  | No  | NA | 0     | 2  | Not-determined | Genome-fragment | NA              | 0     |       |
| S11-final-viral-combined_k141_307896 | [full]   | 1123  | No  | NA | 0     | 0  | Not-determined | Genome-fragment | NA              | 0     |       |
| S11_k141_31639                       |          | 1113  | No  | NA | 1     | 0  | Low-quality    | Genome-fragment | 2.48            | 0     |       |
| S1-final-viral-combined_k141_320066  | [full]   | 1113  | No  | NA | 1     | 0  | Low-quality    | Genome-fragment | 2.36            | 0     |       |
| S5_k141_169765                       |          | 1113  | No  | NA | 2     | 0  | Low-quality    | Genome-fragment | 2.72            | 0     |       |
| S7-final-viral-combined_k141_222001  | [full]   | 1113  | No  | NA | 2     | 0  | Low-quality    | Genome-fragment | 2.65            | 0     |       |
| S11-final-viral-combined_k141_196991 | [full]   | 11885 | No  | NA | 0     | 6  | Not-determined | Genome-fragment | NA              | 0     |       |
| S11-final-viral-combined_k141_128342 | [full]   | 8797  | No  | NA | 0     | 5  | Not-determined | Genome-fragment | NA              | 0     |       |
| S17-final-viral-combined_k141_95250  | [full]   | 1113  | No  | NA | 0     | 0  | Low-quality    | Genome-fragment | 1.36            | 0     |       |
| S17-final-viral-combined_k141_30386  | [full]   | 1113  | No  | NA | 0     | 1  | Low-quality    | Genome-fragment | 2.18            | 0     |       |
| S11-final-viral-combined_k141_101322 | [full]   | 1262  | No  | NA | 0     | 1  | Not-determined | Genome-fragment | NA              | 0     |       |
| S11-final-viral-combined_k141_320937 | [full]   | 3301  | No  | NA | 0     | 0  | Not-determined | Genome-fragment | NA              | 0     |       |
| S17-final-viral-combined_k141_210921 | [full]   | 1113  | No  | NA | 0     | 0  | Low-quality    | Genome-fragment | 3.27            | 0     |       |
| S17-k141_171356                      |          | 1113  | No  | NA | 2     | 0  | Low-quality    | Genome-fragment | 2.75            | 0     |       |
| S11-final-viral-combined_k141_128374 | [full]   | 1526  | No  | NA | 0     | 1  | Not-determined | Genome-fragment | NA              | 0     |       |
| S11-final-viral-combined_k141_239194 | [full]   | 1094  | No  | NA | 0     | 1  | Not-determined | Genome-fragment | NA              | 0     |       |
| S11-final-viral-combined_k141_239194 | [full]   | 3607  | No  | NA | 0     | 0  | Not-determined | Genome-fragment | NA              | 0     |       |
| S11-final-viral-combined_k141_45984  | [full]   | 1285  | No  | NA | 0     | 1  | Not-determined | Genome-fragment | NA              | 0     |       |
| S11-final-viral-combined_k141_156020 | [full]   | 6290  | No  | NA | 0     | 3  | Not-determined | Genome-fragment | NA              | 0     |       |
| S11-final-viral-combined_k141_31571  | [full]   | 1173  | No  | NA | 0     | 1  | Not-determined | Genome-fragment | NA              | 0     |       |
| S17-k141_243312                      |          | 1113  | No  | NA | 0     | 0  | Low-quality    | Genome-fragment | 1.71            | 0     |       |
| S11-final-viral-combined_k141_128396 | [full]   | 2171  | No  | NA | 0     | 0  | Not-determined | Genome-fragment | NA              | 0     |       |
| S11-final-viral-combined_k141_72833  | [full]   | 2651  | No  | NA | 0     | 1  | Not-determined | Genome-fragment | NA              | 0     |       |
| S11-final-viral-combined_k141_72837  | [full]   | 5810  | No  | NA | 0     | 3  | Not-determined | Genome-fragment | NA              | 0     |       |
| S12-final-viral-combined_k141_23492  | [full]   | 1113  | No  | NA | 0     | 0  | Low-quality    | Genome-fragment | 1.54            | 0     |       |
| S12-final-viral-combined_k141_11517  | [H2gene] | 1113  | No  | NA | 0     | 0  | Low-quality    | Genome-fragment | 2.44            | 0     |       |
| S12_k141_365228                      |          | 1113  | No  | NA | 0     | 2  | Low-quality    | Genome-fragment | 0.41            | 0     |       |
| S11-final-viral-combined_k141_280643 | [full]   | 4488  | No  | NA | 0     | 7  | Not-determined | Genome-fragment | NA              | 0     |       |
| S2-final-viral-combined_k141_214258  | [H2gene] | 1113  | No  | NA | 1     | 0  | Low-quality    | Genome-fragment | 5.18            | 0     |       |
| S4-final-viral-combined_k141_38497   | [full]   | 1113  | No  | NA | 0     | 0  | Low-quality    | Genome-fragment | 3.13            | 0     |       |
| S6_k141_100515                       |          | 1113  | No  | NA | 0     | 0  | Low-quality    | Genome-fragment | 3.29            | 0     |       |
| S11-final-viral-combined_k141_17823  | [full]   | 1120  | No  | NA | 0     | 1  | Not-determined | Genome-fragment | NA              | 0     |       |
| S11-final-viral-combined_k141_72881  | [full]   | 3767  | No  | NA | 0     | 1  | Not-determined | Genome-fragment | NA              | 0     |       |
| S9_k141_34500                        |          | 1114  | No  | NA | 0     | 1  | Low-quality    | Genome-fragment | 0.79            | 0     |       |
| S11-final-viral-combined_k141_101337 | [full]   | 78390 | Yes | NA | 25287 | 13 | 28             | Medium-quality  | Genome-fragment | 66.28 | 67.74 |
| S5-final-viral-combined_k141_197499  | [full]   | 1114  | No  | NA | 0     | 0  | Low-quality    | Genome-fragment | 2.3             | 0     |       |
| S5-final-viral-combined_k141_140133  | [full]   | 1114  | No  | NA | 0     | 1  | Low-quality    | Genome-fragment | 3.56            | 0     |       |
| S11-final-viral-combined_k141_19771  | [full]   | 2047  | No  | NA | 0     | 0  | Not-determined | Genome-fragment | NA              | 0     |       |
| S17-k141_61519                       |          | 1114  | No  | NA | 0     | 0  | Low-quality    | Genome-fragment | 2.23            | 0     |       |
| S11-final-viral-combined_k141_211748 | [full]   | 1271  | No  | NA | 0     | 0  | Not-determined | Genome-fragment | NA              | 0     |       |
| S12-final-viral-combined_k141_120861 | [full]   | 1114  | No  | NA | 0     | 0  | Low-quality    | Genome-fragment | 2.7             | 0     |       |
| S11-final-viral-combined_k141_239251 | [full]   | 2923  | No  | NA | 0     | 2  | Not-determined | Genome-fragment | NA              | 0     |       |
| S11-final-viral-combined_k141_22160  | [full]   | 2865  | No  | NA | 0     | 0  | Not-determined | Genome-fragment | NA              | 0     |       |
| S11-final-viral-combined_k141_142382 | [full]   | 2907  | No  | NA | 0     | 3  | Not-determined | Genome-fragment | NA              | 0     |       |
| S11-final-viral-combined_k141_17859  | [full]   | 1461  | No  | NA | 0     | 1  | Not-determined | Genome-fragment | NA              | 0     |       |
| S11-final-viral-combined_k141_21104  | [full]   | 3471  | No  | NA | 0     | 2  | Not-determined | Genome-fragment | NA              | 0     |       |
| S11-final-viral-combined_k141_72904  | [full]   | 3507  | No  | NA | 0     | 0  | Not-determined | Genome-fragment | NA              | 0     |       |
| S12-final-viral-combined_k141_374248 | [H2gene] | 1114  | No  | NA | 1     | 0  | Low-quality    | Genome-fragment | 26.77           | 0     |       |
| S11-final-viral-combined_k141_170361 | [full]   | 20669 | No  | NA | 0     | 13 | Not-determined | Genome-fragment | NA              | 0     |       |
| S12-final-viral-combined_k141_5533   | [H2gene] | 1114  | No  | NA | 0     | 0  | Low-quality    | Genome-fragment | 2.62            | 0     |       |
| S11-final-viral-combined_k141_114169 | [full]   | 3584  | No  | NA | 0     | 0  | Not-determined | Genome-fragment | NA              | 0     |       |
| S11-final-viral-combined_k141_252598 | [full]   | 1660  | No  | NA | 0     | 0  | Not-determined | Genome-fragment | NA              | 0     |       |
| S11-final-viral-combined_k141_101386 | [full]   | 2977  | No  | NA | 0     | 4  | Not-determined | Genome-fragment | NA              | 0     |       |
| S12_k141_332850                      |          | 1114  | No  | NA | 0     | 0  | Low-quality    | Genome-fragment | 2.71            | 0     |       |
| S11-final-viral-combined_k141_114181 | [full]   | 2508  | No  | NA | 0     | 3  | Not-determined | Genome-fragment | NA              | 0     |       |
| S11-final-viral-combined_k141_142436 | [full]   | 1212  | No  | NA | 0     | 0  | Not-determined | Genome-fragment | NA              | 0     |       |
| S11-final-viral-combined_k141_87425  | [full]   | 1359  | No  | NA | 0     | 1  | Not-determined | Genome-fragment | NA              | 0     |       |
| S11-final-viral-combined_k141_128480 | [full]   | 1608  | No  | NA | 0     | 0  | Not-determined | Genome-fragment | NA              | 0     |       |
| S2-final-viral-combined_k141_204760  | [H2gene] | 1114  | No  | NA | 0     | 0  | Low-quality    | Genome-fragment | 2.35            | 0     |       |
| S11-final-viral-combined_k141_183782 | [full]   | 5951  | No  | NA | 0     | 3  | Not-determined | Genome-fragment | NA              | 0     |       |
| S11-final-viral-combined_k141_197126 | [full]   | 1541  | No  |    |       |    |                |                 |                 |       |       |



|                                       |          |       |     |     |   |    |                |                 |    |       |       |
|---------------------------------------|----------|-------|-----|-----|---|----|----------------|-----------------|----|-------|-------|
| S11-final-viral-combined_k141_3212031 | [full]   | 11275 | No  | NA  | 0 | 7  | Not-determined | Genome-fragment | NA | 0     | 0     |
| S8-final-viral-combined_k141_7640371  | [H2gene] | 11115 | No  | NA  | 0 | 0  | Low-quality    | Genome-fragment | NA | 2.26  | 0     |
| S11-final-viral-combined_k141_293937  | [full]   | 1658  | No  | NA  | 0 | 1  | Not-determined | Genome-fragment | NA | 0     | 0     |
| S11-final-viral-combined_k141_322111  | [full]   | 1310  | No  | NA  | 0 | 0  | Not-determined | Genome-fragment | NA | 0     | 0     |
| S11-final-viral-combined_k141_2808381 | [full]   | 3539  | No  | NA  | 0 | 2  | Not-determined | Genome-fragment | NA | 0     | 0     |
| S9-final-viral-combined_k141_865071   | [H2gene] | 11116 | No  | NA  | 1 | 0  | Low-quality    | Genome-fragment | NA | 2.44  | 0     |
| S11-final-viral-combined_k141_1171611 | [full]   | 11116 | No  | NA  | 0 | 0  | Low-quality    | Genome-fragment | NA | 3.03  | 0     |
| S11-final-viral-combined_k141_2939551 | [full]   | 1458  | No  | NA  | 0 | 1  | Not-determined | Genome-fragment | NA | 0     | 0     |
| S11-final-viral-combined_k141_280851  | [full]   | 2943  | No  | NA  | 0 | 2  | Not-determined | Genome-fragment | NA | 0     | 0     |
| S1-final-viral-combined_k141_388509   | [full]   | 11116 | No  | NA  | 0 | 0  | Low-quality    | Genome-fragment | NA | 2.87  | 0     |
| S11-final-viral-combined_k141_59983   | [full]   | 8832  | No  | NA  | 0 | 2  | Not-determined | Genome-fragment | NA | 0     | 0     |
| S1_k141_221468                        |          | 11116 | No  | NA  | 0 | 1  | Low-quality    | Genome-fragment | NA | 2.18  | 0     |
| S5_k141_165069                        |          | 11116 | No  | NA  | 0 | 3  | Low-quality    | Genome-fragment | NA | 3.27  | 0     |
| S11-final-viral-combined_k141_180111  | [full]   | 2225  | No  | NA  | 0 | 1  | Not-determined | Genome-fragment | NA | 0     | 0     |
| S7-final-viral-combined_k141_728551   | [full]   | 11116 | No  | NA  | 1 | 0  | Low-quality    | Genome-fragment | NA | 2.87  | 0     |
| S17-final-viral-combined_k141_2543721 | [full]   | 11116 | No  | NA  | 1 | 0  | Low-quality    | Genome-fragment | NA | 3.43  | 0     |
| S11-final-viral-combined_k141_463171  | [full]   | 1098  | No  | NA  | 0 | 1  | Not-determined | Genome-fragment | NA | 0     | 0     |
| S11-final-viral-combined_k141_731131  | [full]   | 2972  | No  | NA  | 0 | 2  | Not-determined | Genome-fragment | NA | 0     | 0     |
| S11-final-viral-combined_k141_2528021 | [full]   | 1158  | No  | NA  | 0 | 1  | Not-determined | Genome-fragment | NA | 0     | 0     |
| S11-final-viral-combined_k141_180421  | [full]   | 3092  | No  | NA  | 0 | 1  | Not-determined | Genome-fragment | NA | 0     | 0     |
| S11-final-viral-combined_k141_463211  | [full]   | 1617  | No  | NA  | 0 | 1  | Not-determined | Genome-fragment | NA | 0     | 0     |
| S12-final-viral-combined_k141_186851  | [full]   | 11116 | No  | NA  | 0 | 2  | Low-quality    | Genome-fragment | NA | 0.35  | 0     |
| S12_k141_260654                       |          | 11116 | No  | NA  | 0 | 1  | Low-quality    | Genome-fragment | NA | 0.54  | 0     |
| S11-final-viral-combined_k141_1973651 | [full]   | 1134  | No  | NA  | 0 | 1  | Not-determined | Genome-fragment | NA | 0     | 0     |
| S11-final-viral-combined_k141_1563841 | [full]   | 2394  | No  | NA  | 0 | 0  | Not-determined | Genome-fragment | NA | 0     | 0     |
| S11-final-viral-combined_k141_3213201 | [full]   | 8460  | No  | NA  | 0 | 2  | Not-determined | Genome-fragment | NA | 0     | 0     |
| S11-final-viral-combined_k141_180571  | [full]   | 3008  | No  | NA  | 0 | 2  | Not-determined | Genome-fragment | NA | 0     | 0     |
| S2-final-viral-combined_k141_1131031  | [full]   | 11116 | No  | NA  | 0 | 0  | Low-quality    | Genome-fragment | NA | 2.63  | 0     |
| S11-final-viral-combined_k141_114371  | [full]   | 1697  | No  | NA  | 0 | 0  | Not-determined | Genome-fragment | NA | 0     | 0     |
| S2-final-viral-combined_k141_1367131  | [H2gene] | 11116 | No  | NA  | 1 | 0  | Low-quality    | Genome-fragment | NA | 3.6   | 0     |
| S2-final-viral-combined_k141_914521   | [H2gene] | 11116 | No  | NA  | 1 | 0  | Low-quality    | Genome-fragment | NA | 2.41  | 0     |
| S2_k141_105983                        |          | 11116 | No  | NA  | 0 | 1  | Not-determined | Genome-fragment | NA | 0.73  | 0     |
| S11-final-viral-combined_k141_731701  | [full]   | 2674  | No  | NA  | 0 | 1  | Not-determined | Genome-fragment | NA | 0     | 0     |
| S11-final-viral-combined_k141_322941  | [full]   | 1992  | No  | NA  | 0 | 0  | Not-determined | Genome-fragment | NA | 0     | 0     |
| S11-final-viral-combined_k141_1706791 | [full]   | 1548  | No  | NA  | 0 | 1  | Not-determined | Genome-fragment | NA | 0     | 0     |
| S9-final-viral-combined_k141_1216071  | [full]   | 11117 | No  | NA  | 0 | 0  | Low-quality    | Genome-fragment | NA | 2.4   | 0     |
| S9-final-viral-combined_k141_120491   | [H2gene] | 11117 | No  | NA  | 1 | 0  | Low-quality    | Genome-fragment | NA | 3.18  | 0     |
| S11-final-viral-combined_k141_2251631 | [full]   | 2008  | No  | NA  | 0 | 2  | Not-determined | Genome-fragment | NA | 0     | 0     |
| S11-final-viral-combined_k141_1077381 | [full]   | 2146  | No  | NA  | 2 | 2  | Not-determined | Genome-fragment | NA | 0     | 0     |
| S9-final-viral-combined_k141_149191   | [H2gene] | 11117 | No  | NA  | 2 | 0  | Low-quality    | Genome-fragment | NA | 1.62  | 0     |
| S11-final-viral-combined_k141_2192671 | [full]   | 11117 | No  | NA  | 0 | 0  | Low-quality    | Genome-fragment | NA | 0.8   | 0     |
| S11-final-viral-combined_k141_478071  | [full]   | 7037  | No  | NA  | 6 | 6  | Not-determined | Genome-fragment | NA | 0     | 0     |
| S11-final-viral-combined_k141_290097  | [H2gene] | 11117 | No  | NA  | 1 | 0  | Low-quality    | Genome-fragment | NA | 3.18  | 0     |
| S11-final-viral-combined_k141_1845901 | [H2gene] | 11117 | No  | NA  | 2 | 0  | Low-quality    | Genome-fragment | NA | 1.36  | 0     |
| S11-final-viral-combined_k141_1165491 | [H2gene] | 11117 | No  | NA  | 1 | 0  | Low-quality    | Genome-fragment | NA | 0.41  | 0     |
| S11-final-viral-combined_k141_731041  | [full]   | 68219 | No  | NA  | 3 | 11 | Medium-quality | Genome-fragment | NA | 61.42 | 0     |
| S11-final-viral-combined_k141_1292171 | [full]   | 11117 | No  | NA  | 0 | 1  | Low-quality    | Genome-fragment | NA | 0.66  | 0     |
| S2-final-viral-combined_k141_1099061  | [H2gene] | 11117 | No  | NA  | 2 | 0  | Low-quality    | Genome-fragment | NA | 3.41  | 0     |
| S11-final-viral-combined_k141_1288501 | [full]   | 1278  | No  | NA  | 0 | 1  | Not-determined | Genome-fragment | NA | 0     | 0     |
| S11-final-viral-combined_k141_877341  | [full]   | 1461  | No  | NA  | 0 | 0  | Not-determined | Genome-fragment | NA | 0     | 0     |
| S1_k141_277163                        |          | 11117 | No  | NA  | 0 | 1  | Low-quality    | Genome-fragment | NA | 0.83  | 0     |
| S2-final-viral-combined_k141_120981   | [full]   | 11117 | No  | NA  | 0 | 0  | Low-quality    | Genome-fragment | NA | 0.84  | 0     |
| S9_k141_92974                         |          | 11117 | No  | NA  | 1 | 0  | Low-quality    | Genome-fragment | NA | 1.86  | 0     |
| S11-final-viral-combined_k141_2811561 | [full]   | 2820  | No  | NA  | 0 | 2  | Not-determined | Genome-fragment | NA | 0     | 0     |
| S11-final-viral-combined_k141_601011  | [full]   | 1853  | No  | NA  | 0 | 1  | Not-determined | Genome-fragment | NA | 0     | 0     |
| S6-final-viral-combined_k141_716761   | [full]   | 11117 | No  | NA  | 0 | 0  | Not-determined | Genome-fragment | NA | 0.58  | 0     |
| S11-final-viral-combined_k141_308351  | [full]   | 7416  | No  | NA  | 0 | 0  | Not-determined | Genome-fragment | NA | 0     | 0     |
| S7-final-viral-combined_k141_1971131  | [full]   | 11117 | No  | NA  | 0 | 0  | Low-quality    | Genome-fragment | NA | 1.37  | 0     |
| S7_k141_220450                        |          | 11117 | No  | NA  | 0 | 0  | Low-quality    | Genome-fragment | NA | 2.43  | 0     |
| S17-final-viral-combined_k141_1894891 | [full]   | 11117 | No  | NA  | 0 | 0  | Low-quality    | Genome-fragment | NA | 2.58  | 0     |
| S11-final-viral-combined_k141_1428491 | [full]   | 1321  | No  | NA  | 0 | 1  | Not-determined | Genome-fragment | NA | 0     | 0     |
| S11-final-viral-combined_k141_1146051 | [full]   | 2373  | No  | NA  | 0 | 2  | Not-determined | Genome-fragment | NA | 0     | 0     |
| S11-final-viral-combined_k141_601661  | [full]   | 1586  | No  | NA  | 0 | 1  | Not-determined | Genome-fragment | NA | 0     | 0     |
| S11-final-viral-combined_k141_2396891 | [full]   | 1577  | No  | NA  | 0 | 1  | Not-determined | Genome-fragment | NA | 0     | 0     |
| S17-final-viral-combined_k141_241371  | [full]   | 11117 | No  | NA  | 2 | 0  | Low-quality    | Genome-fragment | NA | 1.48  | 0     |
| S12-final-viral-combined_k141_2061451 | [H2gene] | 11117 | No  | NA  | 1 | 0  | Low-quality    | Genome-fragment | NA | 2.04  | 0     |
| S11-final-viral-combined_k141_1841061 | [full]   | 2715  | No  | NA  | 0 | 0  | Not-determined | Genome-fragment | NA | 0     | 0     |
| S2-final-viral-combined_k141_990341   | [full]   | 11117 | No  | NA  | 1 | 0  | Low-quality    | Genome-fragment | NA | 3.2   | 0     |
| S11-final-viral-combined_k141_602071  | [full]   | 1289  | No  | NA  | 0 | 1  | Not-determined | Genome-fragment | NA | 0     | 0     |
| S11-final-viral-combined_k141_3084121 | [full]   | 1855  | No  | NA  | 0 | 1  | Not-determined | Genome-fragment | NA | 0     | 0     |
| S11-final-viral-combined_k141_712991  | [full]   | 3029  | No  | NA  | 0 | 2  | Not-determined | Genome-fragment | NA | 0     | 0     |
| S11-final-viral-combined_k141_239791  | [full]   | 1506  | No  | NA  | 0 | 0  | Not-determined | Genome-fragment | NA | 0     | 0     |
| S11-final-viral-combined_k141_1019351 | [full]   | 1397  | No  | NA  | 0 | 0  | Not-determined | Genome-fragment | NA | 0     | 0     |
| S11-final-viral-combined_k141_128971  | [full]   | 6508  | No  | NA  | 0 | 2  | Not-determined | Genome-fragment | NA | 0     | 0     |
| S4-final-viral-combined_k141_1498701  | [full]   | 11117 | No  | NA  | 0 | 0  | Low-quality    | Genome-fragment | NA | 0     | 2.88  |
| S11-final-viral-combined_k141_2123021 | [full]   | 4453  | No  | NA  | 0 | 3  | Not-determined | Genome-fragment | NA | 0     | 0     |
| S11-final-viral-combined_k141_182641  | [full]   | 1985  | No  | NA  | 0 | 2  | Not-determined | Genome-fragment | NA | 0     | 0     |
| S11-final-viral-combined_k141_2942091 | [full]   | 1300  | No  | NA  | 0 | 1  | Not-determined | Genome-fragment | NA | 0     | 0     |
| S11-final-viral-combined_k141_1289821 | [full]   | 1716  | No  | NA  | 0 | 1  | Not-determined | Genome-fragment | NA | 0     | 0     |
| S11-final-viral-combined_k141_1019451 | [full]   | 1171  | No  | NA  | 0 | 1  | Not-determined | Genome-fragment | NA | 0     | 0     |
| S4-final-viral-combined_k141_795181   | [full]   | 11117 | No  | NA  | 0 | 1  | Low-quality    | Genome-fragment | NA | 1.63  | 0     |
| S4_k141_75828                         |          | 11117 | No  | NA  | 0 | 1  | Low-quality    | Genome-fragment | NA | 2.32  | 0     |
| S11-final-viral-combined_k141_2701241 | [H2gene] | 11118 | No  | NA  | 1 | 0  | Low-quality    | Genome-fragment | NA | 2.44  | 0     |
| S11-final-viral-combined_k141_1708631 | [full]   | 2819  | No  | NA  | 0 | 3  | Not-determined | Genome-fragment | NA | 1.49  | 0     |
| S5_k141_152380                        |          | 11118 | No  | NA  | 0 | 0  | Low-quality    | Genome-fragment | NA | 0     | 0     |
| S11-final-viral-combined_k141_465191  | [full]   | 4119  | No  | NA  | 0 | 1  | Not-determined | Genome-fragment | NA | 0     | 0     |
| S11-final-viral-combined_k141_3084861 | [full]   | 2291  | No  | NA  | 0 | 0  | Not-determined | Genome-fragment | NA | 0     | 0     |
| S11-final-viral-combined_k141_1039851 | [full]   | 1526  | No  | NA  | 0 | 1  | Not-determined | Genome-fragment | NA | 0     | 0     |
| S5_k141_140802                        |          | 11118 | No  | NA  | 0 | 0  | Low-quality    | Genome-fragment | NA | 1.88  | 0     |
| S11-final-viral-combined_k141_3215071 | [full]   | 5593  | No  | NA  | 0 | 4  | Not-determined | Genome-fragment | NA | 0     | 0     |
| S7-final-viral-combined_k141_2352231  | [full]   | 11118 | No  | NA  | 0 | 1  | Low-quality    | Genome-fragment | NA | 3.57  | 0     |
| S7-final-viral-combined_k141_108081   | [full]   | 11118 | No  | NA  | 0 | 0  | Low-quality    | Genome-fragment | NA | 2.75  | 0     |
| S11-final-viral-combined_k141_326201  | [full]   | 1682  | No  | NA  | 0 | 0  | Not-determined | Genome-fragment | NA | 0     | 0     |
| S7-final-viral-combined_k141_994581   | [full]   | 11118 | No  | NA  | 1 | 0  | Low-quality    | Genome-fragment | NA | 2.51  | 0     |
| S7_k141_162243                        |          | 11118 | No  | NA  | 0 | 0  | Low-quality    | Genome-fragment | NA | 0.33  | 0     |
| S17-final-viral-combined_k141_1522781 | [full]   | 11118 | No  | NA  | 1 | 0  | Low-quality    | Genome-fragment | NA | 1.96  | 0     |
| S11-final-viral-combined_k141_3215331 | [full]   | 1280  | No  | NA  | 0 | 2  | Not-determined | Genome-fragment | NA | 0     | 0     |
| S12-final-viral-combined_k141_2350991 | [full]   | 11118 | No  | NA  | 0 | 0  | Low-quality    | Genome-fragment | NA | 2.15  | 0     |
| S6-final-viral-combined_k141_144601   | [full]   | 11118 | No  | NA  | 0 | 0  | Low-quality    | Genome-fragment | NA | 1.33  | 0     |
| S6-final-viral-combined_k141_1021601  | [H2gene] | 11118 | No  | NA  | 1 | 0  | Low-quality    | Genome-fragment | NA | 3.47  | 0     |
| S8-final-viral-combined_k141_2603141  | [full]   | 11118 | No  | NA  | 2 | 0  | Low-quality    | Genome-fragment | NA | 2.72  | 0     |
| S11-final-viral-combined_k141_1430061 | [full]   | 1860  | No  | NA  | 0 | 1  | Not-determined | Genome-fragment | NA | 0     | 0     |
| S8_k141_90445                         |          | 11118 | No  | NA  | 0 | 0  | Low-quality    | Genome-fragment | NA | 2.58  | 0     |
| S11_k141_18771                        |          | 11119 | No  | NA  | 0 | 1  | Low-quality    | Genome-fragment | NA | 0.52  | 0     |
| S11-final-viral-combined_k141_2257891 | [full]   | 3044  | No  | NA  | 0 | 0  | Not-determined | Genome-fragment | NA | 0     | 0     |
| S11_k141_40108                        |          | 11119 | No  | NA  | 0 | 1  | Low-quality    | Genome-fragment | NA | 1.34  | 0     |
| S11-final-viral-combined_k141_281391  | [full]   | 2907  | No  | NA  | 0 | 2  | Not-determined | Genome-fragment | NA | 0     | 0     |
| S2_k141_91325                         |          | 11119 | No  | NA  | 0 | 0  | Low-quality    | Genome-fragment | NA | 1.07  | 0     |
| S5-final-viral-combined_k141_1847851  | [H2gene] | 11119 | No  | NA  | 2 | 0  | Low-quality    | Genome-fragment | NA | 2.54  | 0     |
| S11-final-viral-combined_k141_2399051 | [full]   | 3719  | No  | NA  | 0 | 1  | Not-determined | Genome-fragment | NA | 0     | 0     |
| S11-final-viral-combined_k141_2813961 | [full]   | 2329  | No  | NA  | 0 | 0  | Not-determined | Genome-fragment | NA | 0     | 0     |
| S11-final-viral-combined_k141_2813971 | [full]   | 2075  | No  | NA  | 0 | 2  | Not-determined | Genome-fragment | NA | 0     | 0     |
| S11-final-viral-combined_k141_2669361 | [full]   | 3232  | No  | NA  | 0 | 0  | Not-determined | Genome-fragment | NA | 0     | 0     |
| S5_k141_113752                        |          | 11119 | Yes | 503 | 1 | 1  | Low-quality    | Genome-fragment | NA | 1.12  | 55.05 |
| S11-final-viral-combined_k141_253181  | [full]   | 1885  | No  | NA  | 0 | 0  | Not-determined | Genome-fragment | NA | 0     | 0     |
| S11-final-viral-combined_k141_879601  | [full]   | 2559  | No  | NA  | 0 | 2  | Not-determined | Genome-fragment | NA | 0     | 0     |
| S11-final-viral-combined_k141_49891   | [full]   | 1456  | No  | NA  | 0 | 1  | Not-determined | Genome-fragment | NA | 0     | 0     |
| S7-final-viral-combined_k141_270331   | [full]   | 11119 | No  | NA  | 0 | 0  | Low-quality    | Genome-fragment | NA | 0.77  | 0     |
| S11-final-viral-combined_k141_1709481 | [full]   | 3612  | No  | NA  | 0 | 1  | Not-determined | Genome-fragment | NA | 0     | 0     |
| S12-final-viral-combined_k141_1297671 | [H2gene] | 11119 | No  | NA  | 1 | 0  | Low-quality    | Genome-fragment | NA | 1     | 0     |
| S2_k141_97706                         |          | 11    |     |     |   |    |                |                 |    |       |       |



|                                       |          |       |     |    |       |    |                |                 |              |       |     |
|---------------------------------------|----------|-------|-----|----|-------|----|----------------|-----------------|--------------|-------|-----|
| S11-final-viral-combined_k141_185621  | [full]   | 2755  | No  | NA | 0     | 2  | Not-determined | Genome-fragment | NA           | 0     | 0   |
| S11-final-viral-combined_k141_52461   | [full]   | 1235  | No  | NA | 0     | 0  | Not-determined | Genome-fragment | NA           | 0     | 0   |
| S5_k141_83478                         |          | 1121  | No  | NA | 0     | 1  | Low-quality    | Genome-fragment | NA           | 3.58  | 0   |
| S7-final-viral-combined_k141_123711   | [full]   | 1121  | No  | NA | 1     | 0  | Low-quality    | Genome-fragment | NA           | 1.61  | 0   |
| S11-final-viral-combined_k141_1843821 | [full]   | 1577  | No  | NA | 0     | 1  | Not-determined | Genome-fragment | NA           | 0     | 0   |
| S11-final-viral-combined_k141_2401391 | [full]   | 7259  | No  | NA | 0     | 2  | Not-determined | Genome-fragment | NA           | 0     | 0   |
| S7-final-viral-combined_k141_1982651  | [full]   | 1121  | No  | NA | 1     | 0  | Low-quality    | Genome-fragment | NA           | 2.75  | 0   |
| S7_k141_126320                        |          | 1121  | No  | NA | 0     | 1  | Low-quality    | Genome-fragment | NA           | 0.37  | 0   |
| S11-final-viral-combined_k141_328101  | [full]   | 5526  | No  | NA | 0     | 5  | Not-determined | Genome-fragment | NA           | 0     | 0   |
| S11-final-viral-combined_k141_1568431 | [full]   | 2314  | No  | NA | 0     | 1  | Not-determined | Genome-fragment | NA           | 0     | 0   |
| S11-final-viral-combined_k141_3217061 | [full]   | 2631  | No  | NA | 0     | 2  | Not-determined | Genome-fragment | NA           | 0     | 0   |
| S17-final-viral-combined_k141_1712311 | [full]   | 1121  | No  | NA | 0     | 0  | Low-quality    | Genome-fragment | NA           | 3.04  | 0   |
| S12-final-viral-combined_k141_432831  | [full]   | 1121  | No  | NA | 1     | 0  | Low-quality    | Genome-fragment | NA           | 2.23  | 0   |
| S11-final-viral-combined_k141_2126831 | [full]   | 2859  | No  | NA | 0     | 0  | Not-determined | Genome-fragment | NA           | 0     | 0   |
| S11-final-viral-combined_k141_1253371 | [full]   | 1715  | No  | NA | 0     | 1  | Not-determined | Genome-fragment | NA           | 0     | 0   |
| S11-final-viral-combined_k141_2671541 | [full]   | 1019  | No  | NA | 0     | 2  | Not-determined | Genome-fragment | NA           | 0     | 0   |
| S11-final-viral-combined_k141_1844201 | [full]   | 2304  | No  | NA | 0     | 1  | Not-determined | Genome-fragment | NA           | 0     | 0   |
| S12-final-viral-combined_k141_196851  | [full]   | 1121  | No  | NA | 0     | 0  | Low-quality    | Genome-fragment | NA           | 2.14  | 0   |
| S12-final-viral-combined_k141_499731  | [full]   | 1121  | No  | NA | 0     | 1  | Low-quality    | Genome-fragment | NA           | 0.58  | 0   |
| S11-final-viral-combined_k141_736111  | [full]   | 2491  | No  | NA | 0     | 0  | Not-determined | Genome-fragment | NA           | 0     | 0   |
| S12-final-viral-combined_k141_2902421 | [H2gene] | 1121  | No  | NA | 1     | 0  | Low-quality    | Genome-fragment | NA           | 1.47  | 0   |
| S12_k141_284464                       |          | 1121  | No  | NA | 0     | 0  | Low-quality    | Genome-fragment | NA           | 0.52  | 0   |
| S11-final-viral-combined_k141_2945681 | [full]   | 1201  | No  | NA | 0     | 1  | Not-determined | Genome-fragment | NA           | 0     | 0   |
| S2-final-viral-combined_k141_1047711  | [full]   | 1121  | No  | NA | 2     | 0  | Low-quality    | Genome-fragment | NA           | 2.69  | 0   |
| S2-final-viral-combined_k141_1713731  | [full]   | 1121  | No  | NA | 0     | 0  | Low-quality    | Genome-fragment | NA           | 0.62  | 0   |
| S11-final-viral-combined_k141_466161  | [full]   | 2964  | No  | NA | 8     | 0  | Medium-quality | Genome-fragment | NA           | 62.59 | 0   |
| S11-final-viral-combined_k141_1710661 | [full]   | 3031  | No  | NA | 0     | 1  | Not-determined | Genome-fragment | NA           | 0     | 0   |
| S11-final-viral-combined_k141_329021  | [full]   | 5899  | No  | NA | 0     | 3  | Not-determined | Genome-fragment | NA           | 0     | 0   |
| S2-final-viral-combined_k141_908451   | [full]   | 1121  | No  | NA | 0     | 0  | Low-quality    | Genome-fragment | NA           | 3.6   | 0   |
| S4_k141_163236                        |          | 1121  | No  | NA | 0     | 0  | Low-quality    | Genome-fragment | NA           | 0.93  | 0   |
| S11-final-viral-combined_k141_736631  | [full]   | 1350  | No  | NA | 0     | 0  | Not-determined | Genome-fragment | NA           | 0     | 0   |
| S11-final-viral-combined_k141_468161  | [full]   | 3992  | No  | NA | 2     | 0  | Not-determined | Genome-fragment | NA           | 0     | 0   |
| S11-final-viral-combined_k141_1151521 | [full]   | 1453  | No  | NA | 0     | 0  | Not-determined | Genome-fragment | NA           | 0     | 0   |
| S11-final-viral-combined_k141_1710841 | [full]   | 3657  | No  | NA | 0     | 3  | Not-determined | Genome-fragment | NA           | 0     | 0   |
| S11-final-viral-combined_k141_1569741 | [full]   | 5358  | No  | NA | 0     | 2  | Not-determined | Genome-fragment | NA           | 0     | 0   |
| S11-final-viral-combined_k141_2946121 | [full]   | 1318  | No  | NA | 0     | 0  | Not-determined | Genome-fragment | NA           | 0     | 0   |
| S6_k141_139142                        |          | 1121  | No  | NA | 0     | 0  | Low-quality    | Genome-fragment | NA           | 2.23  | 0   |
| S8-final-viral-combined_k141_1760081  | [full]   | 1121  | No  | NA | 0     | 1  | Low-quality    | Genome-fragment | NA           | 2.92  | 0   |
| S11-final-viral-combined_k141_468441  | [full]   | 7709  | No  | NA | 0     | 7  | Not-determined | Genome-fragment | NA           | 0     | 0   |
| S11-final-viral-combined_k141_1432851 | [full]   | 1249  | No  | NA | 0     | 1  | Not-determined | Genome-fragment | NA           | 0     | 0   |
| S11-final-viral-combined_k141_1569741 | [full]   | 1185  | No  | NA | 0     | 0  | Not-determined | Genome-fragment | NA           | 0     | 0   |
| S11-final-viral-combined_k141_1151711 | [full]   | 3313  | No  | NA | 0     | 2  | Not-determined | Genome-fragment | NA           | 0     | 0   |
| S11-final-viral-combined_k141_2946271 | [full]   | 3425  | No  | NA | 0     | 3  | Not-determined | Genome-fragment | NA           | 0     | 0   |
| S11-final-viral-combined_k141_54021   | [full]   | 1572  | No  | NA | 0     | 1  | Not-determined | Genome-fragment | NA           | 0     | 0   |
| S8-final-viral-combined_k141_45561    | [H2gene] | 1121  | No  | NA | 1     | 0  | Low-quality    | Genome-fragment | NA           | 2.31  | 0   |
| S8_k141_35475                         |          | 1121  | No  | NA | 0     | 0  | Low-quality    | Genome-fragment | NA           | 0.4   | 0   |
| S11-final-viral-combined_k141_1980801 | [full]   | 21682 | No  | NA | 0     | 13 | Not-determined | Genome-fragment | NA           | 0     | 0   |
| S11-final-viral-combined_k141_2946661 | [full]   | 1076  | No  | NA | 0     | 0  | Not-determined | Genome-fragment | NA           | 0     | 0   |
| S11-final-viral-combined_k141_1569861 | [full]   | 2721  | No  | NA | 0     | 3  | Not-determined | Genome-fragment | NA           | 0     | 0   |
| S11-final-viral-combined_k141_2946731 | [full]   | 1440  | No  | NA | 0     | 1  | Not-determined | Genome-fragment | NA           | 0     | 0   |
| S11-final-viral-combined_k141_2457331 | [full]   | 1122  | No  | NA | 2     | 0  | Low-quality    | Genome-fragment | NA           | 3.02  | 0   |
| S11_k141_223054                       |          | 1122  | No  | NA | 0     | 0  | Low-quality    | Genome-fragment | NA           | 0.4   | 0   |
| S11_k141_50654                        |          | 1122  | No  | NA | 1     | 0  | Low-quality    | Genome-fragment | NA           | 1.88  | 0   |
| S5-final-viral-combined_k141_105411   | [full]   | 1122  | No  | NA | 1     | 0  | Low-quality    | Genome-fragment | NA           | 2.49  | 0   |
| S7-final-viral-combined_k141_493831   | [full]   | 1122  | No  | NA | 1     | 0  | Low-quality    | Genome-fragment | NA           | 1.68  | 0   |
| S11-final-viral-combined_k141_2946921 | [full]   | 1634  | No  | NA | 0     | 0  | Not-determined | Genome-fragment | NA           | 0     | 0   |
| S7-final-viral-combined_k141_1468581  | [H2gene] | 1122  | No  | NA | 0     | 0  | Low-quality    | Genome-fragment | NA           | 2.67  | 0   |
| S11-final-viral-combined_k141_2947041 | [full]   | 2735  | No  | NA | 0     | 2  | Not-determined | Genome-fragment | NA           | 0     | 0   |
| S11-final-viral-combined_k141_882951  | [full]   | 1400  | No  | NA | 0     | 2  | Not-determined | Genome-fragment | NA           | 0     | 0   |
| S17-final-viral-combined_k141_1887941 | [H2gene] | 1122  | No  | NA | 1     | 0  | Low-quality    | Genome-fragment | NA           | 3.62  | 0   |
| S17-k141_192648                       |          | 1122  | No  | NA | 0     | 1  | Low-quality    | Genome-fragment | NA           | 0.49  | 0   |
| S17-k141_260762                       |          | 1122  | No  | NA | 0     | 0  | Low-quality    | Genome-fragment | NA           | 2.11  | 0   |
| S17-k141_52707                        |          | 1122  | No  | NA | 0     | 1  | Low-quality    | Genome-fragment | NA           | 0.79  | 0   |
| S11-final-viral-combined_k141_2404051 | [full]   | 4886  | No  | NA | 0     | 1  | Not-determined | Genome-fragment | NA           | 0     | 0   |
| S11-final-viral-combined_k141_1711751 | [full]   | 2002  | No  | NA | 0     | 0  | Not-determined | Genome-fragment | NA           | 0     | 0   |
| S11-final-viral-combined_k141_3218341 | [full]   | 2398  | No  | NA | 0     | 2  | Not-determined | Genome-fragment | NA           | 0     | 0   |
| S12_k141_132836                       |          | 1122  | No  | NA | 0     | 1  | Low-quality    | Genome-fragment | NA           | 0.38  | 0   |
| S11-final-viral-combined_k141_883221  | [full]   | 6184  | No  | NA | 0     | 1  | Not-determined | Genome-fragment | NA           | 0     | 0   |
| S4-final-viral-combined_k141_158481   | [H2gene] | 1122  | No  | NA | 1     | 0  | Low-quality    | Genome-fragment | NA           | 3.7   | 0   |
| S6_k141_79827                         |          | 1122  | No  | NA | 0     | 1  | Low-quality    | Genome-fragment | NA           | 0.73  | 0   |
| S11-final-viral-combined_k141_717741  | [H2gene] | 1123  | No  | NA | 1     | 0  | Low-quality    | Genome-fragment | NA           | 2.85  | 0   |
| S11_k141_61829                        |          | 1123  | No  | NA | 0     | 1  | Low-quality    | Genome-fragment | NA           | 1.42  | 0   |
| S1-final-viral-combined_k141_406061   | [full]   | 1123  | No  | NA | 1     | 0  | Low-quality    | Genome-fragment | NA           | 2.78  | 0   |
| S11-final-viral-combined_k141_2535821 | [full]   | 1998  | No  | NA | 0     | 1  | Not-determined | Genome-fragment | NA           | 0     | 0   |
| S1-final-viral-combined_k141_107191   | [H2gene] | 1123  | No  | NA | 0     | 0  | Low-quality    | Genome-fragment | NA           | 2.62  | 0   |
| S1-final-viral-combined_k141_2628881  | [H2gene] | 1123  | No  | NA | 1     | 0  | Low-quality    | Genome-fragment | NA           | 1.83  | 0   |
| S11-final-viral-combined_k141_2261351 | [full]   | 3347  | No  | NA | 0     | 2  | Not-determined | Genome-fragment | NA           | 0     | 0   |
| S11-final-viral-combined_k141_1846681 | [full]   | 4157  | No  | NA | 0     | 1  | Not-determined | Genome-fragment | NA           | 0     | 0   |
| S11-final-viral-combined_k141_2947841 | [full]   | 1267  | No  | NA | 0     | 1  | Not-determined | Genome-fragment | NA           | 0     | 0   |
| S11-final-viral-combined_k141_2673181 | [full]   | 1848  | No  | NA | 0     | 2  | Not-determined | Genome-fragment | NA           | 0     | 0   |
| S11-final-viral-combined_k141_3218601 | [full]   | 2792  | No  | NA | 0     | 1  | Not-determined | Genome-fragment | NA           | 0     | 0   |
| S5-final-viral-combined_k141_73511    | [full]   | 1123  | No  | NA | 0     | 0  | Low-quality    | Genome-fragment | NA           | 2.49  | 0   |
| S11-final-viral-combined_k141_1153091 | [full]   | 1433  | No  | NA | 0     | 1  | Not-determined | Genome-fragment | NA           | 0     | 0   |
| S11-final-viral-combined_k141_1295061 | [full]   | 1692  | No  | NA | 0     | 1  | Not-determined | Genome-fragment | NA           | 0     | 0   |
| S5-final-viral-combined_k141_160261   | [full]   | 1123  | No  | NA | 0     | 0  | Low-quality    | Genome-fragment | NA           | 0.77  | 0   |
| S5-final-viral-combined_k141_1702431  | [H2gene] | 1123  | No  | NA | 1     | 0  | Low-quality    | Genome-fragment | NA           | 0.61  | 0   |
| S11-final-viral-combined_k141_1295431 | [full]   | 2241  | No  | NA | 0     | 2  | Not-determined | Genome-fragment | NA           | 0     | 0   |
| S5-final-viral-combined_k141_917221   | [H2gene] | 1123  | No  | NA | 1     | 0  | Low-quality    | Genome-fragment | NA           | 2.84  | 0   |
| S11-final-viral-combined_k141_331101  | [full]   | 4127  | No  | NA | 1     | 0  | Not-determined | Genome-fragment | NA           | 0     | 0   |
| S7-final-viral-combined_k141_1855651  | [full]   | 1123  | No  | NA | 1     | 0  | Low-quality    | Genome-fragment | NA           | 2.06  | 0   |
| S11-final-viral-combined_k141_470991  | [full]   | 2004  | No  | NA | 0     | 3  | Not-determined | Genome-fragment | NA           | 0     | 0   |
| S11-final-viral-combined_k141_2261651 | [full]   | 3307  | No  | NA | 8     | 1  | Medium-quality | Genome-fragment | NA           | 78.45 | 0   |
| S11-final-viral-combined_k141_3313131 | [full]   | 6884  | No  | NA | 0     | 7  | Not-determined | Genome-fragment | NA           | 0     | 0   |
| S12-final-viral-combined_k141_679461  | [full]   | 1123  | No  | NA | 1     | 0  | Low-quality    | Genome-fragment | NA           | 0.71  | 0   |
| S11-final-viral-combined_k141_55631   | [full]   | 4271  | No  | NA | 0     | 3  | Not-determined | Genome-fragment | NA           | 0     | 0   |
| S12-final-viral-combined_k141_3718441 | [full]   | 1123  | No  | NA | 0     | 0  | Low-quality    | Genome-fragment | NA           | 1.93  | 0   |
| S11-final-viral-combined_k141_471411  | [full]   | 2093  | No  | NA | 0     | 1  | Not-determined | Genome-fragment | NA           | 0     | 0   |
| S12-final-viral-combined_k141_3792521 | [full]   | 1123  | No  | NA | 0     | 1  | Low-quality    | Genome-fragment | NA           | 1.84  | 0   |
| S12-final-viral-combined_k141_3005081 | [full]   | 1123  | No  | NA | 0     | 0  | Low-quality    | Genome-fragment | NA           | 0.76  | 0   |
| S11-final-viral-combined_k141_2673631 | [full]   | 2317  | No  | NA | 0     | 0  | Not-determined | Genome-fragment | NA           | 0     | 0   |
| S12-final-viral-combined_k141_3875491 | [H2gene] | 1123  | No  | NA | 1     | 0  | Low-quality    | Genome-fragment | NA           | 2.75  | 0   |
| S11-final-viral-combined_k141_1291931 | [full]   | 1972  | No  | NA | 0     | 1  | Not-determined | Genome-fragment | NA           | 0     | 0   |
| S11-final-viral-combined_k141_1713401 | [full]   | 1388  | No  | NA | 0     | 0  | Not-determined | Genome-fragment | NA           | 0     | 0   |
| S12_k141_180810                       |          | 1123  | No  | NA | 0     | 0  | Low-quality    | Genome-fragment | NA           | 0.6   | 0   |
| S11-final-viral-combined_k141_1847701 | [full]   | 3195  | No  | NA | 0     | 1  | Not-determined | Genome-fragment | NA           | 0     | 0   |
| S2-final-viral-combined_k141_1526601  | [full]   | 1123  | No  | NA | 0     | 0  | Low-quality    | Genome-fragment | NA           | 2.23  | 0   |
| S2_k141_4420                          |          | 1123  | No  | NA | 0     | 0  | Low-quality    | Genome-fragment | NA           | 2.71  | 0   |
| S11-final-viral-combined_k141_2406161 | [full]   | 1668  | No  | NA | 0     | 1  | Not-determined | Genome-fragment | NA           | 0     | 0   |
| S11-final-viral-combined_k141_1847911 | [full]   | 8204  | No  | NA | 0     | 0  | Not-determined | Genome-fragment | NA           | 0     | 0   |
| S8_k141_97849                         |          | 1123  | No  | NA | 0     | 0  | Low-quality    | Genome-fragment | NA           | 1.12  | 0   |
| S8-final-viral-combined_k141_1236871  | [H2gene] | 1124  | No  | NA | 1     | 0  | Low-quality    | Genome-fragment | NA           | 2.83  | 0   |
| S11-final-viral-combined_k141_1384101 | [full]   | 1124  | No  | NA | 0     | 0  | Low-quality    | Genome-fragment | NA           | 2.32  | 0   |
| S11-final-viral-combined_k141_3092701 | [full]   | 4510  | No  | NA | 0     | 3  | Not-determined | Genome-fragment | NA           | 0     | 0   |
| S11-final-viral-combined_k141_3219381 | [full]   | 42506 | Yes | NA | 39787 | 7  | 7              | High-quality    | High-quality | 92.89 | 6.4 |
| S11-final-viral-combined_k141_245451  | [full]   | 1124  | No  | NA | 0     | 0  | Low-quality    | Genome-fragment | NA           | 2.73  | 0   |
| S11-final-viral-combined_k141_2262361 | [full]   | 3272  | No  | NA | 0     | 4  | Not-determined | Genome-fragment | NA           | 0     | 0   |
| S11-final-viral-combined_k141_2838951 | [full]   | 1124  | No  | NA | 0     | 0  | Low-quality    | Genome-fragment | NA           | 1.46  | 0   |
| S11_k141_119680                       |          | 1124  | No  | NA | 0     | 0  | Low-quality    | Genome-fragment | NA           | 2.98  | 0   |
| S11-final-viral-combined_k141_332121  | [full]   | 1762  | No  | NA | 0     | 1  | Not-determined | Genome-fragment | NA           | 0     | 0   |
| S11-final-viral-combined_k141_1529161 | [full]   | 1124  | No  | NA | 0     | 0  | Low-quality    | Genome-fragment | NA           | 1.31  | 0   |
| S11-final-viral-combined_k141_1295421 | [full]   | 3035  | No  | NA | 0     | 2  | Not-determined | Genome-fragment | NA</         |       |     |



|                                      |          |       |     |    |       |    |    |                |                 |    |       |       |
|--------------------------------------|----------|-------|-----|----|-------|----|----|----------------|-----------------|----|-------|-------|
| S11-final-viral-combined_k141_143768 | [full]   | 2984  | No  | NA |       | 0  | 2  | Not-determined | Genome-fragment | NA |       | 0     |
| S11-final-viral-combined_k141_190521 | [full]   | 41546 | Yes |    | 36129 | 0  | 1  | Medium-quality | Genome-fragment | NA | 66.2  | 11.04 |
| S11-final-viral-combined_k141_173514 | [full]   | 3260  | No  | NA |       | 0  | 2  | Not-determined | Genome-fragment | NA |       | 0     |
| S1_k141_45831                        |          | 1125  | No  |    |       | 0  | 1  | Low-quality    | Genome-fragment |    | 3.72  | 0     |
| S5-final-viral-combined_k141_108199  | [H2gene] | 1125  | No  | NA |       | 1  | 0  | Low-quality    | Genome-fragment |    | 3.33  | 0     |
| S11-final-viral-combined_k141_115141 | [full]   | 1087  | No  | NA |       | 0  | 0  | Not-determined | Genome-fragment | NA |       | 0     |
| S7-final-viral-combined_k141_26649   | [full]   | 1125  | No  | NA |       | 0  | 2  | Low-quality    | Genome-fragment |    | 2.59  | 0     |
| S11-final-viral-combined_k141_226492 | [full]   | 1329  | No  | NA |       | 0  | 0  | Not-determined | Genome-fragment | NA |       | 0     |
| S11-final-viral-combined_k141_281551 | [full]   | 2555  | No  | NA |       | 0  | 1  | Not-determined | Genome-fragment | NA |       | 0     |
| S11-final-viral-combined_k141_171529 | [full]   | 2066  | No  | NA |       | 0  | 3  | Not-determined | Genome-fragment | NA |       | 0     |
| S11-final-viral-combined_k141_184917 | [full]   | 1710  | No  | NA |       | 0  | 1  | Not-determined | Genome-fragment | NA |       | 0     |
| S11-final-viral-combined_k141_322131 | [full]   | 1337  | No  | NA |       | 0  | 0  | Not-determined | Genome-fragment | NA |       | 0     |
| S11-final-viral-combined_k141_322149 | [full]   | 2473  | No  | NA |       | 0  | 2  | Not-determined | Genome-fragment | NA |       | 0     |
| S11-final-viral-combined_k141_157537 | [full]   | 1219  | No  | NA |       | 0  | 1  | Not-determined | Genome-fragment | NA |       | 0     |
| S17-final-viral-combined_k141_232319 | [H2gene] | 1125  | No  | NA |       | 1  | 0  | Low-quality    | Genome-fragment |    | 2.54  | 0     |
| S11-final-viral-combined_k141_198559 | [full]   | 8454  | No  | NA |       | 0  | 7  | Not-determined | Genome-fragment | NA |       | 0     |
| S11-final-viral-combined_k141_226519 | [full]   | 1349  | No  | NA |       | 0  | 0  | Not-determined | Genome-fragment | NA |       | 0     |
| S12-final-viral-combined_k141_184339 | [full]   | 1125  | No  | NA |       | 0  | 0  | Low-quality    | Genome-fragment |    | 0.82  | 0     |
| S11-final-viral-combined_k141_207814 | [full]   | 2507  | No  | NA |       | 0  | 2  | Not-determined | Genome-fragment | NA |       | 0     |
| S12-final-viral-combined_k141_259427 | [full]   | 1125  | No  | NA |       | 0  | 0  | Low-quality    | Genome-fragment |    | 0.87  | 0     |
| S11-final-viral-combined_k141_157590 | [full]   | 4156  | No  | NA |       | 0  | 1  | Not-determined | Genome-fragment | NA |       | 0     |
| S12-final-viral-combined_k141_210363 | [full]   | 1125  | No  | NA |       | 1  | 0  | Low-quality    | Genome-fragment |    | 1.81  | 0     |
| S11-final-viral-combined_k141_322218 | [full]   | 1688  | No  | NA |       | 0  | 1  | Not-determined | Genome-fragment | NA |       | 0     |
| S11-final-viral-combined_k141_190571 | [full]   | 1050  | No  | NA |       | 0  | 1  | Not-determined | Genome-fragment | NA |       | 0     |
| S4-final-viral-combined_k141_123221  | [H2gene] | 1125  | No  | NA |       | 1  | 0  | Low-quality    | Genome-fragment |    | 2.89  | 0     |
| S11-final-viral-combined_k141_184984 | [full]   | 2428  | No  | NA |       | 0  | 2  | Not-determined | Genome-fragment | NA |       | 0     |
| S11-final-viral-combined_k141_240890 | [full]   | 24596 | No  | NA |       | 0  | 18 | Not-determined | Genome-fragment | NA |       | 0     |
| S11-final-viral-combined_k141_282227 | [full]   | 27969 | No  | NA |       | 16 | 3  | Medium-quality | Genome-fragment |    | 59.35 | 0     |
| S11-final-viral-combined_k141_103072 | [full]   | 2015  | No  | NA |       | 0  | 2  | Not-determined | Genome-fragment | NA |       | 0     |
| S9-final-viral-combined_k141_67816   | [full]   | 1126  | No  | NA |       | 0  | 0  | Low-quality    | Genome-fragment |    | 0.63  | 0     |
| S11-final-viral-combined_k141_213368 | [full]   | 4328  | No  | NA |       | 0  | 3  | Not-determined | Genome-fragment | NA |       | 0     |
| S11-final-viral-combined_k141_322338 | [full]   | 6907  | No  | NA |       | 0  | 3  | Not-determined | Genome-fragment | NA |       | 0     |
| S11-final-viral-combined_k141_306546 | [full]   | 1126  | No  | NA |       | 0  | 0  | Low-quality    | Genome-fragment |    | 2.63  | 0     |
| S11-final-viral-combined_k141_157704 | [full]   | 1671  | No  | NA |       | 0  | 1  | Not-determined | Genome-fragment | NA |       | 0     |
| S4-final-viral-combined_k141_369485  | [H2gene] | 1126  | No  | NA |       | 1  | 0  | Low-quality    | Genome-fragment |    | 18.95 | 0     |
| S3-final-viral-combined_k141_206338  | [H2gene] | 1126  | No  | NA |       | 1  | 0  | Low-quality    | Genome-fragment |    | 2.44  | 0     |
| S1_k141_27069                        |          | 1126  | No  | NA |       | 0  | 0  | Low-quality    | Genome-fragment |    | 0.91  | 0     |
| S11-final-viral-combined_k141_61241  | [full]   | 6106  | No  | NA |       | 0  | 4  | Not-determined | Genome-fragment | NA |       | 0     |
| S11-final-viral-combined_k141_295326 | [full]   | 1739  | No  | NA |       | 0  | 2  | Not-determined | Genome-fragment | NA |       | 0     |
| S11-final-viral-combined_k141_191561 | [full]   | 1372  | No  | NA |       | 0  | 0  | Not-determined | Genome-fragment | NA |       | 0     |
| S11-final-viral-combined_k141_282320 | [full]   | 1145  | No  | NA |       | 0  | 0  | Not-determined | Genome-fragment | NA |       | 0     |
| S11-final-viral-combined_k141_236679 | [full]   | 1965  | No  | NA |       | 0  | 2  | Not-determined | Genome-fragment | NA |       | 0     |
| S11-final-viral-combined_k141_198700 | [full]   | 1241  | No  | NA |       | 0  | 1  | Not-determined | Genome-fragment | NA |       | 0     |
| S3-final-viral-combined_k141_431221  | [full]   | 1126  | No  | NA |       | 0  | 0  | Low-quality    | Genome-fragment |    | 2.25  | 0     |
| S11-final-viral-combined_k141_322338 | [full]   | 3842  | No  | NA |       | 0  | 2  | Not-determined | Genome-fragment | NA |       | 0     |
| S11-final-viral-combined_k141_254282 | [full]   | 4445  | No  | NA |       | 0  | 2  | Not-determined | Genome-fragment | NA |       | 0     |
| S11-final-viral-combined_k141_322354 | [full]   | 1799  | No  | NA |       | 0  | 0  | Not-determined | Genome-fragment | NA |       | 0     |
| S5-final-viral-combined_k141_681     | [full]   | 1126  | Yes |    | 723   | 1  | 1  | Low-quality    | Genome-fragment |    | 1.8   | 35.79 |
| S5-final-viral-combined_k141_58271   | [full]   | 1126  | No  | NA |       | 0  | 1  | Low-quality    | Genome-fragment |    | 0.47  | 0     |
| S11-final-viral-combined_k141_33645  | [full]   | 1113  | No  | NA |       | 0  | 1  | Not-determined | Genome-fragment | NA |       | 0     |
| S7-final-viral-combined_k141_122794  | [full]   | 1126  | No  | NA |       | 1  | 0  | Low-quality    | Genome-fragment |    | 3.06  | 0     |
| S7-final-viral-combined_k141_538571  | [full]   | 1126  | No  | NA |       | 0  | 1  | Low-quality    | Genome-fragment |    | 5.51  | 0     |
| S11-final-viral-combined_k141_254333 | [full]   | 1996  | No  | NA |       | 0  | 1  | Not-determined | Genome-fragment | NA |       | 0     |
| S11-final-viral-combined_k141_61339  | [full]   | 2617  | No  | NA |       | 0  | 1  | Not-determined | Genome-fragment | NA |       | 0     |
| S7-final-viral-combined_k141_5110    | [full]   | 1126  | No  | NA |       | 1  | 0  | Low-quality    | Genome-fragment |    | 0.69  | 0     |
| S11-final-viral-combined_k141_47668  | [full]   | 1338  | No  | NA |       | 0  | 1  | Not-determined | Genome-fragment | NA |       | 0     |
| S7_k141_44491                        |          | 1126  | No  | NA |       | 1  | 0  | Low-quality    | Genome-fragment |    | 1.4   | 0     |
| S17-final-viral-combined_k141_109193 | [full]   | 1126  | No  | NA |       | 1  | 0  | Low-quality    | Genome-fragment |    | 2.06  | 0     |
| S11-final-viral-combined_k141_295357 | [full]   | 3206  | No  | NA |       | 0  | 2  | Not-determined | Genome-fragment | NA |       | 0     |
| S17_k141_127114                      |          | 1126  | No  | NA |       | 5  | 0  | Low-quality    | Genome-fragment |    | 3.71  | 0     |
| S11-final-viral-combined_k141_322466 | [full]   | 1661  | No  | NA |       | 0  | 0  | Not-determined | Genome-fragment | NA |       | 0     |
| S11-final-viral-combined_k141_144014 | [full]   | 4971  | No  | NA |       | 0  | 2  | Not-determined | Genome-fragment | NA |       | 0     |
| S17_k141_128814                      |          | 1126  | No  | NA |       | 0  | 1  | Low-quality    | Genome-fragment |    | 0.69  | 0     |
| S11-final-viral-combined_k141_213459 | [full]   | 2362  | No  | NA |       | 0  | 2  | Not-determined | Genome-fragment | NA |       | 0     |
| S11-final-viral-combined_k141_214744 | [full]   | 2424  | No  | NA |       | 0  | 2  | Not-determined | Genome-fragment | NA |       | 0     |
| S11-final-viral-combined_k141_185140 | [full]   | 3038  | No  | NA |       | 0  | 2  | Not-determined | Genome-fragment | NA |       | 0     |
| S11-final-viral-combined_k141_33758  | [full]   | 1141  | No  | NA |       | 0  | 0  | Not-determined | Genome-fragment | NA |       | 0     |
| S12-final-viral-combined_k141_312699 | [full]   | 1126  | No  | NA |       | 1  | 0  | Low-quality    | Genome-fragment |    | 2.21  | 0     |
| S2-final-viral-combined_k141_168373  | [full]   | 1126  | No  | NA |       | 0  | 0  | Low-quality    | Genome-fragment |    | 2.73  | 0     |
| S2-final-viral-combined_k141_244329  | [full]   | 1126  | No  | NA |       | 0  | 1  | Low-quality    | Genome-fragment |    | 1.57  | 0     |
| S11-final-viral-combined_k141_144079 | [full]   | 1180  | No  | NA |       | 0  | 0  | Not-determined | Genome-fragment | NA |       | 0     |
| S4-final-viral-combined_k141_579951  | [H2gene] | 1126  | No  | NA |       | 0  | 0  | Low-quality    | Genome-fragment |    | 2.93  | 0     |
| S6-final-viral-combined_k141_53903   | [full]   | 1126  | No  | NA |       | 0  | 0  | Low-quality    | Genome-fragment |    | 1.34  | 0     |
| S8-final-viral-combined_k141_250707  | [H2gene] | 1126  | No  | NA |       | 0  | 0  | Low-quality    | Genome-fragment |    | 2.44  | 0     |
| S11-final-viral-combined_k141_267993 | [full]   | 74748 | Yes |    | 64139 | 26 | 1  | High-quality   | Genome-fragment |    | 14.19 | 0     |
| S9-final-viral-combined_k141_336793  | [full]   | 1127  | No  | NA |       | 2  | 0  | Low-quality    | Genome-fragment |    | 2.5   | 0     |
| S11_k141_297500                      |          | 1127  | No  | NA |       | 1  | 0  | Low-quality    | Genome-fragment |    | 1.78  | 0     |
| S11-final-viral-combined_k141_190863 | [full]   | 2613  | No  | NA |       | 0  | 2  | Not-determined | Genome-fragment | NA |       | 0     |
| S11-final-viral-combined_k141_254282 | [full]   | 1646  | No  | NA |       | 0  | 1  | Not-determined | Genome-fragment | NA |       | 0     |
| S11-final-viral-combined_k141_157977 | [full]   | 5705  | No  | NA |       | 0  | 4  | Not-determined | Genome-fragment | NA |       | 0     |
| S11-final-viral-combined_k141_88966  | [full]   | 1506  | No  | NA |       | 0  | 1  | Not-determined | Genome-fragment | NA |       | 0     |
| S1-final-viral-combined_k141_362171  | [full]   | 1127  | No  | NA |       | 0  | 0  | Low-quality    | Genome-fragment |    | 2.2   | 0     |
| S11-final-viral-combined_k141_295490 | [full]   | 1685  | No  | NA |       | 0  | 0  | Not-determined | Genome-fragment | NA |       | 0     |
| S11-final-viral-combined_k141_350441 | [full]   | 1127  | No  | NA |       | 0  | 0  | Low-quality    | Genome-fragment |    | 0.9   | 0     |
| S5-final-viral-combined_k141_112842  | [full]   | 1127  | No  | NA |       | 0  | 2  | Low-quality    | Genome-fragment |    | 0.78  | 0     |
| S11-final-viral-combined_k141_144137 | [full]   | 3229  | No  | NA |       | 0  | 1  | Not-determined | Genome-fragment | NA |       | 0     |
| S7-final-viral-combined_k141_187752  | [full]   | 1127  | No  | NA |       | 0  | 0  | Low-quality    | Genome-fragment |    | 1.91  | 0     |
| S7-final-viral-combined_k141_178338  | [full]   | 1127  | No  | NA |       | 0  | 0  | Low-quality    | Genome-fragment |    | 2.75  | 0     |
| S11-final-viral-combined_k141_103309 | [full]   | 5622  | No  | NA |       | 0  | 0  | Not-determined | Genome-fragment | NA |       | 0     |
| S11-final-viral-combined_k141_254464 | [full]   | 5746  | No  | NA |       | 0  | 1  | Not-determined | Genome-fragment | NA |       | 0     |
| S12_k141_191382                      |          | 1127  | No  | NA |       | 0  | 1  | Low-quality    | Genome-fragment |    | 2.46  | 0     |
| S11-final-viral-combined_k141_173863 | [full]   | 6406  | No  | NA |       | 0  | 2  | Not-determined | Genome-fragment | NA |       | 0     |
| S11-final-viral-combined_k141_158015 | [full]   | 1731  | No  | NA |       | 0  | 2  | Not-determined | Genome-fragment | NA |       | 0     |
| S11-final-viral-combined_k141_309920 | [full]   | 2888  | No  | NA |       | 0  | 0  | Not-determined | Genome-fragment | NA |       | 0     |
| S11-final-viral-combined_k141_173863 | [full]   | 2401  | No  | NA |       | 0  | 3  | Not-determined | Genome-fragment | NA |       | 0     |
| S2-final-viral-combined_k141_173907  | [full]   | 1127  | No  | NA |       | 0  | 1  | Low-quality    | Genome-fragment |    | 0.52  | 0     |
| S11-final-viral-combined_k141_268061 | [full]   | 2823  | No  | NA |       | 0  | 2  | Not-determined | Genome-fragment | NA |       | 0     |
| S11-final-viral-combined_k141_282631 | [full]   | 1661  | No  | NA |       | 0  | 0  | Not-determined | Genome-fragment | NA |       | 0     |
| S2-final-viral-combined_k141_186381  | [full]   | 1127  | No  | NA |       | 0  | 0  | Low-quality    | Genome-fragment |    | 1.95  | 0     |
| S2-final-viral-combined_k141_82409   | [full]   | 1127  | No  | NA |       | 0  | 0  | Low-quality    | Genome-fragment |    | 1.76  | 0     |
| S11-final-viral-combined_k141_116018 | [full]   | 1531  | No  | NA |       | 0  | 1  | Not-determined | Genome-fragment | NA |       | 0     |
| S11-final-viral-combined_k141_268061 | [full]   | 1783  | No  | NA |       | 0  | 0  | Not-determined | Genome-fragment | NA |       | 0     |
| S11-final-viral-combined_k141_282630 | [full]   | 6359  | No  | NA |       | 0  | 3  | Not-determined | Genome-fragment | NA |       | 0     |
| S11-final-viral-combined_k141_19371  | [full]   | 4078  | No  | NA |       | 0  | 2  | Not-determined | Genome-fragment | NA |       | 0     |
| S2-final-viral-combined_k141_180386  | [H2gene] | 1127  | No  | NA |       | 0  | 0  | Low-quality    | Genome-fragment |    | 2.58  | 0     |
| S6-final-viral-combined_k141_64605   | [full]   | 1127  | No  | NA |       | 1  | 0  | Low-quality    | Genome-fragment |    | 2.23  | 0     |
| S8-final-viral-combined_k141_146599  | [full]   | 1127  | No  | NA |       | 0  | 0  | Low-quality    | Genome-fragment |    | 3.54  | 0     |
| S8_k141_17927                        |          | 1127  | No  | NA |       | 0  | 0  | Low-quality    | Genome-fragment |    | 1.97  | 0     |
| S11-final-viral-combined_k141_47739  | [full]   | 1820  | No  | NA |       | 0  | 1  | Not-determined | Genome-fragment | NA |       | 0     |
| S11-final-viral-combined_k141_6271   | [full]   | 1154  | No  | NA |       | 0  | 1  | Not-determined | Genome-fragment | NA |       | 0     |
| S11-final-viral-combined_k141_74670  | [full]   | 1141  | No  | NA |       | 0  | 2  | Not-determined | Genome-fragment | NA |       | 0     |
| S9-final-viral-combined_k141_78073   | [H2gene] | 1128  | No  | NA |       | 0  | 0  | Low-quality    | Genome-fragment |    | 1.04  | 0     |
| S11-final-viral-combined_k141_214642 | [H2gene] | 1128  | No  | NA |       | 1  | 0  | Low-quality    | Genome-fragment |    | 2.32  | 0     |
| S11-final-viral-combined_k141_309974 | [full]   | 7093  | No  | NA |       | 0  | 9  | Not-determined | Genome-fragment | NA |       | 0     |
| S1-final-viral-combined_k141_1623    | [H2gene] | 1128  | No  | NA |       | 0  | 0  | Low-quality    | Genome-fragment |    | 0.4   | 0     |
| S11-final-viral-combined_k141_171951 | [full]   | 1896  | No  | NA |       | 0  | 3  | Not-determined | Genome-fragment | NA |       | 0     |
| S11-final-viral-combined_k141_74678  | [full]   | 2952  | No  | NA |       | 0  | 2  | Not-determined | Genome-fragment | NA |       | 0     |
| S11-final-viral-combined_k141_16192  | [full]   | 2279  | No  | NA |       | 0  | 1  | Not-determined | Genome-fragment | NA |       | 0     |
| S1_k141_227745                       |          | 1128  | No  | NA |       | 1  | 0  | Low-quality    |                 |    |       |       |



|                                      |          |       |    |    |    |    |                |                   |       |      |
|--------------------------------------|----------|-------|----|----|----|----|----------------|-------------------|-------|------|
| S1-final-viral-combined_k141_108400  | [full]   | 1130  | No | NA | 2  | 0  | Low-quality    | Genome-fragment   | 2.5   | 0    |
| S7-final-viral-combined_k141_175500  | [full]   | 1130  | No | NA | 0  | 0  | Low-quality    | Genome-fragment   | 3.25  | 0    |
| S17-final-viral-combined_k141_11208  | [full]   | 1130  | No | NA | 0  | 0  | Low-quality    | Genome-fragment   | 2.61  | 0    |
| S11-final-viral-combined_k141_268379 | [full]   | 1564  | No | NA | 0  | 1  | Not-determined | Genome-fragment   | NA    | 0    |
| S2-final-viral-combined_k141_110588  | [full]   | 1130  | No | NA | 0  | 0  | Low-quality    | Genome-fragment   | 2.14  | 0    |
| S6-final-viral-combined_k141_158651  | [full]   | 1130  | No | NA | 0  | 0  | Low-quality    | Genome-fragment   | 2.74  | 0    |
| S8-final-viral-combined_k141_140201  | [full]   | 1130  | No | NA | 0  | 1  | Low-quality    | Genome-fragment   | 2.19  | 0    |
| S11-final-viral-combined_k141_310371 | [full]   | 1729  | No | NA | 0  | 2  | Not-determined | Genome-fragment   | NA    | 2.4  |
| S8-final-viral-combined_k141_138461  | [H2gene] | 1130  | No | NA | 0  | 0  | Low-quality    | Genome-fragment   | NA    | 2.4  |
| S9-final-viral-combined_k141_67159   | [full]   | 1131  | No | NA | 1  | 0  | Low-quality    | Genome-fragment   | 2.25  | 0    |
| S11-final-viral-combined_k141_74947  | [full]   | 1510  | No | NA | 0  | 0  | Not-determined | Genome-fragment   | NA    | 0    |
| S11-final-viral-combined_k141_310321 | [full]   | 3595  | No | NA | 0  | 4  | Not-determined | Genome-fragment   | NA    | 0    |
| S11-final-viral-combined_k141_32838  | [full]   | 1131  | No | NA | 0  | 1  | Low-quality    | Genome-fragment   | 1.16  | 0    |
| S11-final-viral-combined_k141_20009  | [full]   | 1131  | No | NA | 0  | 1  | Low-quality    | Genome-fragment   | 0.76  | 0    |
| S11-final-viral-combined_k141_89287  | [full]   | 1039  | No | NA | 0  | 1  | Not-determined | Genome-fragment   | NA    | 2.07 |
| S1-final-viral-combined_k141_188668  | [full]   | 1131  | No | NA | 0  | 0  | Low-quality    | Genome-fragment   | NA    | 0    |
| S11-final-viral-combined_k141_241674 | [full]   | 1996  | No | NA | 0  | 1  | Not-determined | Genome-fragment   | NA    | 0    |
| S11-final-viral-combined_k141_19660  | [full]   | 2202  | No | NA | 0  | 2  | Not-determined | Genome-fragment   | NA    | 0    |
| S11-final-viral-combined_k141_61080  | [full]   | 2122  | No | NA | 0  | 2  | Not-determined | Genome-fragment   | NA    | 0    |
| S11-final-viral-combined_k141_116251 | [full]   | 13998 | No | NA | 0  | 12 | Not-determined | Genome-fragment   | NA    | 0    |
| S1-final-viral-combined_k141_28615   | [full]   | 1131  | No | NA | 0  | 0  | Low-quality    | Genome-fragment   | 2.74  | 0    |
| S1-final-viral-combined_k141_24909   | [H2gene] | 1131  | No | NA | 0  | 0  | Low-quality    | Genome-fragment   | 1.79  | 0    |
| S11-final-viral-combined_k141_172346 | [full]   | 1674  | No | NA | 0  | 0  | Not-determined | Genome-fragment   | NA    | 0    |
| S5_k141_21009                        |          | 1131  | No | NA | 0  | 0  | Low-quality    | Genome-fragment   | 2.01  | 0    |
| S5_k141_104942                       |          | 1131  | No | NA | 0  | 1  | Low-quality    | Genome-fragment   | 2.37  | 0    |
| S11-final-viral-combined_k141_282865 | [full]   | 2412  | No | NA | 0  | 2  | Not-determined | Genome-fragment   | NA    | 0    |
| S11-final-viral-combined_k141_47974  | [full]   | 2931  | No | NA | 0  | 3  | Not-determined | Genome-fragment   | NA    | 0    |
| S11-final-viral-combined_k141_6644   | [full]   | 8228  | No | NA | 0  | 2  | Not-determined | Genome-fragment   | NA    | 0    |
| S7-final-viral-combined_k141_127077  | [full]   | 1131  | No | NA | 0  | 0  | Low-quality    | Genome-fragment   | NA    | 0.9  |
| S11-final-viral-combined_k141_47980  | [full]   | 2776  | No | NA | 0  | 2  | Not-determined | Genome-fragment   | NA    | 0    |
| S11-final-viral-combined_k141_254913 | [full]   | 1401  | No | NA | 0  | 1  | Not-determined | Genome-fragment   | NA    | 0    |
| S11-final-viral-combined_k141_62036  | [full]   | 1794  | No | NA | 0  | 0  | Not-determined | Genome-fragment   | NA    | 0    |
| S11-final-viral-combined_k141_74983  | [full]   | 49793 | No | NA | 20 | 0  | High-quality   | Genome-fragment   | 99.25 | 0    |
| S11-final-viral-combined_k141_34202  | [full]   | 11240 | No | NA | 0  | 0  | Not-determined | Genome-fragment   | NA    | 0    |
| S12-final-viral-combined_k141_382454 | [full]   | 1131  | No | NA | 0  | 1  | Low-quality    | Genome-fragment   | 1.6   | 0    |
| S11-final-viral-combined_k141_101695 | [full]   | 6627  | No | NA | 0  | 0  | Not-determined | Genome-fragment   | NA    | 0    |
| S11-final-viral-combined_k141_254940 | [full]   | 4418  | No | NA | 0  | 5  | Not-determined | Genome-fragment   | NA    | 0    |
| S11-final-viral-combined_k141_144563 | [full]   | 3065  | No | NA | 0  | 3  | Not-determined | Genome-fragment   | NA    | 0    |
| S12-final-viral-combined_k141_267920 | [full]   | 1131  | No | NA | 0  | 0  | Low-quality    | Genome-fragment   | 2.69  | 0    |
| S11-final-viral-combined_k141_282903 | [full]   | 9631  | No | NA | 0  | 3  | Not-determined | Genome-fragment   | NA    | 0    |
| S11-final-viral-combined_k141_116333 | [full]   | 2336  | No | NA | 0  | 2  | Not-determined | Genome-fragment   | NA    | 0    |
| S11-final-viral-combined_k141_31095  | [full]   | 9043  | No | NA | 0  | 2  | Not-determined | Genome-fragment   | NA    | 0    |
| S11-final-viral-combined_k141_241759 | [full]   | 2958  | No | NA | 0  | 2  | Not-determined | Genome-fragment   | NA    | 0    |
| S12_k141_260067                      |          | 1131  | No | NA | 0  | 0  | Low-quality    | Genome-fragment   | 2.22  | 0    |
| S2-final-viral-combined_k141_101145  | [H2gene] | 1131  | No | NA | 1  | 0  | Low-quality    | Genome-fragment   | 1.64  | 0    |
| S4-final-viral-combined_k141_150867  | [full]   | 1131  | No | NA | 0  | 0  | Low-quality    | Genome-fragment   | 0.99  | 0    |
| S8-final-viral-combined_k141_63689   | [full]   | 1131  | No | NA | 1  | 0  | Low-quality    | Genome-fragment   | 3.43  | 0    |
| S11-final-viral-combined_k141_227368 | [full]   | 1659  | No | NA | 0  | 1  | Not-determined | Genome-fragment   | NA    | 1.69 |
| S8_k141_116247                       |          | 1131  | No | NA | 0  | 0  | Low-quality    | Genome-fragment   | NA    | 0    |
| S11-final-viral-combined_k141_89382  | [full]   | 1922  | No | NA | 0  | 3  | Not-determined | Genome-fragment   | NA    | 1.99 |
| S11-final-viral-combined_k141_212064 | [full]   | 1132  | No | NA | 0  | 0  | Low-quality    | Genome-fragment   | NA    | 0    |
| S11-final-viral-combined_k141_6725   | [full]   | 2162  | No | NA | 0  | 0  | Not-determined | Genome-fragment   | NA    | 0    |
| S11-final-viral-combined_k141_213977 | [full]   | 5453  | No | NA | 0  | 0  | Not-determined | Genome-fragment   | NA    | 0    |
| S1-final-viral-combined_k141_134118  | [full]   | 1132  | No | NA | 1  | 0  | Low-quality    | Genome-fragment   | 2.86  | 0    |
| S1-final-viral-combined_k141_151802  | [full]   | 1132  | No | NA | 0  | 0  | Low-quality    | Genome-fragment   | 2.64  | 0    |
| S11-final-viral-combined_k141_19929  | [full]   | 4112  | No | NA | 0  | 0  | Not-determined | Genome-fragment   | NA    | 0    |
| S5-final-viral-combined_k141_99862   | [full]   | 1132  | No | NA | 0  | 0  | Low-quality    | Genome-fragment   | 3.25  | 0    |
| S5-final-viral-combined_k141_194384  | [full]   | 1132  | No | NA | 0  | 0  | Low-quality    | Genome-fragment   | 1.72  | 0    |
| S11-final-viral-combined_k141_342361 | [full]   | 1809  | No | NA | 0  | 0  | Not-determined | Genome-fragment   | NA    | 2.14 |
| S11-final-viral-combined_k141_135524 | [full]   | 1132  | No | NA | 0  | 1  | Low-quality    | Genome-fragment   | NA    | 0    |
| S11-final-viral-combined_k141_144590 | [full]   | 2080  | No | NA | 0  | 1  | Not-determined | Genome-fragment   | NA    | 2.38 |
| S11-final-viral-combined_k141_227391 | [full]   | 4881  | No | NA | 0  | 2  | Not-determined | Genome-fragment   | NA    | 0.74 |
| S7-final-viral-combined_k141_145732  | [full]   | 1132  | No | NA | 0  | 0  | Low-quality    | Genome-fragment   | 2.23  | 0    |
| S7_k141_158372                       |          | 1132  | No | NA | 0  | 0  | Low-quality    | Genome-fragment   | 0.74  | 0    |
| S12_k141_138958                      |          | 1132  | No | NA | 2  | 0  | Low-quality    | Genome-fragment   | 2.51  | 0    |
| S4-final-viral-combined_k141_123827  | [H2gene] | 1132  | No | NA | 0  | 0  | Low-quality    | Genome-fragment   | 2.23  | 0    |
| S11-final-viral-combined_k141_322973 | [full]   | 2010  | No | NA | 0  | 1  | Not-determined | Genome-fragment   | NA    | 0    |
| S11-final-viral-combined_k141_62134  | [full]   | 2457  | No | NA | 0  | 1  | Not-determined | Genome-fragment   | NA    | 3.43 |
| S6-final-viral-combined_k141_18998   | [full]   | 1132  | No | NA | 0  | 0  | Low-quality    | Genome-fragment   | NA    | 2.51 |
| S8-final-viral-combined_k141_142329  | [full]   | 1132  | No | NA | 0  | 0  | Low-quality    | Genome-fragment   | NA    | 1.62 |
| S11-final-viral-combined_k141_62139  | [full]   | 1475  | No | NA | 0  | 0  | Not-determined | Genome-fragment   | NA    | 0.82 |
| S11-final-viral-combined_k141_322981 | [full]   | 3603  | No | NA | 0  | 1  | Not-determined | Genome-fragment   | NA    | 0.69 |
| S11-final-viral-combined_k141_99648  | [full]   | 1133  | No | NA | 1  | 0  | Low-quality    | Genome-fragment   | 2.02  | 0    |
| S11-final-viral-combined_k141_307551 | [full]   | 1133  | No | NA | 0  | 2  | Low-quality    | Genome-fragment   | NA    | 0    |
| S11-final-viral-combined_k141_295861 | [full]   | 1924  | No | NA | 0  | 0  | Not-determined | Genome-fragment   | NA    | 0    |
| S11-final-viral-combined_k141_33655  | [H2gene] | 1133  | No | NA | 1  | 0  | Low-quality    | Genome-fragment   | 0.69  | 0    |
| S11-final-viral-combined_k141_34302  | [full]   | 1129  | No | NA | 0  | 2  | Not-determined | Genome-fragment   | NA    | 0    |
| S1-final-viral-combined_k141_314547  | [full]   | 1133  | No | NA | 1  | 0  | Low-quality    | Genome-fragment   | NA    | 2.02 |
| S11-final-viral-combined_k141_343061 | [full]   | 2000  | No | NA | 0  | 1  | Not-determined | Genome-fragment   | NA    | 0    |
| S11-final-viral-combined_k141_255061 | [full]   | 3198  | No | NA | 0  | 0  | Not-determined | Genome-fragment   | NA    | 0    |
| S11-final-viral-combined_k141_268581 | [full]   | 1291  | No | NA | 0  | 1  | Not-determined | Genome-fragment   | NA    | 1    |
| S1-final-viral-combined_k141_173640  | [full]   | 1133  | No | NA | 0  | 0  | Low-quality    | Genome-fragment   | NA    | 0    |
| S11-final-viral-combined_k141_6801   | [full]   | 2415  | No | NA | 0  | 1  | Not-determined | Genome-fragment   | NA    | 2.35 |
| S12-final-viral-combined_k141_277046 | [full]   | 1133  | No | NA | 0  | 0  | Low-quality    | Genome-fragment   | NA    | 0    |
| S11-final-viral-combined_k141_89478  | [full]   | 2183  | No | NA | 0  | 0  | Not-determined | Genome-fragment   | NA    | 0    |
| S11-final-viral-combined_k141_89482  | [full]   | 3493  | No | NA | 0  | 2  | Not-determined | Genome-fragment   | NA    | 0    |
| S1_k141_199478                       |          | 1133  | No | NA | 0  | 0  | Low-quality    | Genome-fragment   | 2.07  | 0    |
| S7-final-viral-combined_k141_70042   | [full]   | 1133  | No | NA | 0  | 2  | Low-quality    | Genome-fragment   | 2.53  | 0    |
| S11-final-viral-combined_k141_232003 | [full]   | 6416  | No | NA | 0  | 1  | Not-determined | Genome-fragment   | NA    | 0    |
| S11-final-viral-combined_k141_310491 | [full]   | 2198  | No | NA | 0  | 1  | Not-determined | Genome-fragment   | NA    | 0    |
| S7-final-viral-combined_k141_174657  | [full]   | 1133  | No | NA | 0  | 0  | Low-quality    | Genome-fragment   | 2.11  | 0    |
| S11-final-viral-combined_k141_310510 | [full]   | 1018  | No | NA | 0  | 0  | Not-determined | Genome-fragment   | NA    | 0.66 |
| S17-final-viral-combined_k141_205645 | [full]   | 1133  | No | NA | 0  | 0  | Low-quality    | Genome-fragment   | NA    | 0.72 |
| S11-final-viral-combined_k141_310515 | [full]   | 1088  | No | NA | 0  | 0  | Not-determined | Genome-fragment   | NA    | 0    |
| S17_k141_53661                       |          | 1133  | No | NA | 0  | 2  | Not-determined | Genome-fragment   | NA    | 0    |
| S11-final-viral-combined_k141_158709 | [full]   | 2265  | No | NA | 0  | 2  | Not-determined | Genome-fragment   | NA    | 0    |
| S11-final-viral-combined_k141_172444 | [full]   | 1961  | No | NA | 0  | 2  | Not-determined | Genome-fragment   | NA    | 0    |
| S11-final-viral-combined_k141_158713 | [full]   | 1627  | No | NA | 0  | 2  | Not-determined | Genome-fragment   | NA    | 0    |
| S11-final-viral-combined_k141_114484 | [full]   | 1917  | No | NA | 0  | 1  | Not-determined | Genome-fragment   | NA    | 0    |
| S11-final-viral-combined_k141_75185  | [full]   | 1217  | No | NA | 0  | 1  | Not-determined | Genome-fragment   | NA    | 1.59 |
| S12-final-viral-combined_k141_174841 | [H2gene] | 1133  | No | NA | 1  | 0  | Low-quality    | Genome-fragment   | NA    | 0    |
| S11-final-viral-combined_k141_114480 | [full]   | 1715  | No | NA | 0  | 1  | Not-determined | Genome-fragment   | NA    | 2.43 |
| S12-final-viral-combined_k141_116452 | [H2gene] | 1133  | No | NA | 1  | 0  | Low-quality    | Genome-fragment   | NA    | 0    |
| S11-final-viral-combined_k141_268653 | [full]   | 1356  | No | NA | 0  | 0  | Not-determined | Genome-fragment   | NA    | 0    |
| S11-final-viral-combined_k141_48135  | [full]   | 2578  | No | NA | 0  | 2  | Not-determined | Genome-fragment   | NA    | 0    |
| S11-final-viral-combined_k141_323046 | [full]   | 2840  | No | NA | 0  | 2  | Not-determined | Genome-fragment   | NA    | 0    |
| S11-final-viral-combined_k141_144734 | [full]   | 2510  | No | NA | 0  | 2  | Not-determined | Genome-fragment   | NA    | 2.6  |
| S12_k141_160604                      |          | 1133  | No | NA | 2  | 0  | Low-quality    | Genome-fragment   | NA    | 0    |
| S11-final-viral-combined_k141_323051 | [full]   | 4670  | No | NA | 0  | 3  | Not-determined | Genome-fragment   | NA    | 2.3  |
| S11-final-viral-combined_k141_310594 | [full]   | 2109  | No | NA | 0  | 1  | Low-quality    | Genome-fragment   | NA    | 0.68 |
| S2-final-viral-combined_k141_142701  | [full]   | 1133  | No | NA | 0  | 0  | Low-quality    | Genome-fragment   | NA    | 0    |
| S11-final-viral-combined_k141_214134 | [full]   | 6240  | No | NA | 0  | 1  | Not-determined | Genome-fragment   | NA    | 0    |
| S9-final-viral-combined_k141_15894   | [full]   | 1134  | No | NA | 0  | 1  | Low-quality    | Genome-fragment   | NA    | 0    |
| S11-final-viral-combined_k141_19943  | [full]   | 8416  | No | NA | 0  | 2  | Not-determined | Genome-fragment   | NA    | 0.67 |
| S11-final-viral-combined_k141_13062  | [full]   | 5418  | No | NA | 0  | 0  | Low-quality    | Genome-fragment   | NA    | 0    |
| S9-final-viral-combined_k141_76899   | [H2gene] | 1134  | No | NA | 2  | 0  | Low-quality    | Genome-fragment   | NA    | 0    |
| S11-final-viral-combined_k141_199387 | [full]   | 1709  | No | NA | 0  | 2  | Not-determined | Genome-fragment   | NA    | 0    |
| S11-final-viral-combined_k141_6989   | [full]   | 4025  | No | NA | 0  | 3  | Not-determined | Genome-fragment   | NA    | 0    |
| S11-final-viral-combined_k141_197331 | [full]   | 2307  | No | NA | 0  | 1  | Not-determined | Genome-fragment   | NA    | 0    |
| S11-final-viral-combined_k141_130546 | [full]   | 1132  | No | NA | 0  | 0  | Not-determined | Genome-fragment   | NA    | 2.63 |
| S11-final-viral-combined_k141_135167 | [H2gene] | 1134  | No | NA | 1  | 0  | Low-quality    | Genome-fragment   | NA    | 0    |
| S11-final-viral-combined_k141_130651 | [full]   | 1658  | No | NA | 0  | 1  | Not-determined | Genome-fragment   | NA    | 2.84 |
| S11-final-viral-combined_k141_330154 | [H2gene] | 1134  | No | NA | 1  | 0  | Low-quality    | Genome-fragment   | NA    | 1.35 |
| S11-final-viral-combined_k141_323081 | [full]   | 1340  | No | NA | 0  | 0  | Not-determined | Genome-fragment   | NA    | 0    |
| S12-final-viral-combined_k141_39326  | [full]   | 1134  | No | NA | 0  | 0  | Low-quality    | Genome-fragment   | NA    | 0    |
| S11-final-viral-combined_k141_89595  | [full]   | 1540  | No | NA | 0  | 0  | Not-determined | Genome-fragment   | NA    | 0    |
| S11-final-viral-combined_k141_62489  | [full]   | 2023  | No | NA | 0  | 2  | Not-determined | Genome-fragment   | NA    | 0    |
| S11-final-viral-combined_k141_24182  | [full]   | 6489  | No | NA | 0  | 3  | Not-determined | Genome-fragment   | NA    | 0.56 |
| S4-final-viral-combined_k141_154972  | [full]   | 1134  | No | NA | 0  | 1  | Low-quality    | Genome-fragment</ |       |      |



|                                      |          |    |    |    |                |                 |       |   |
|--------------------------------------|----------|----|----|----|----------------|-----------------|-------|---|
| S3_k141_126467                       | 1136 No  | NA | 1  | 0  | Low-quality    | Genome-fragment | 0.88  | 0 |
| S5-final-viral-combined_k141_207664  | 1136 No  | NA | 0  | 0  | Low-quality    | Genome-fragment | 2.61  | 0 |
| S11-final-viral-combined_k141_283206 | 4754 No  | NA | 0  | 0  | Not-determined | Genome-fragment | NA    | 0 |
| S11-final-viral-combined_k141_296138 | 2463 No  | NA | 0  | 0  | Not-determined | Genome-fragment | NA    | 0 |
| S11-final-viral-combined_k141_255314 | 2981 No  | NA | 0  | 2  | Not-determined | Genome-fragment | NA    | 0 |
| S11-final-viral-combined_k141_753841 | 1157 No  | NA | 0  | 1  | Not-determined | Genome-fragment | NA    | 0 |
| S11-final-viral-combined_k141_48303  | 1118 No  | NA | 0  | 1  | Not-determined | Genome-fragment | NA    | 0 |
| S11-final-viral-combined_k141_19584  | 2017 No  | NA | 0  | 1  | Not-determined | Genome-fragment | NA    | 0 |
| S11-final-viral-combined_k141_89146  | 2645 No  | NA | 0  | 2  | Not-determined | Genome-fragment | NA    | 0 |
| S5-final-viral-combined_k141_146271  | 1136 No  | NA | 2  | 0  | Low-quality    | Genome-fragment | 2.96  | 0 |
| S17-final-viral-combined_k141_193410 | 1136 No  | NA | 1  | 0  | Low-quality    | Genome-fragment | 2.03  | 0 |
| S17-final-viral-combined_k141_94076  | 1136 No  | NA | 0  | 0  | Low-quality    | Genome-fragment | 2.24  | 0 |
| S17-final-viral-combined_k141_117455 | 1136 No  | NA | 1  | 0  | Low-quality    | Genome-fragment | 1.68  | 0 |
| S11-final-viral-combined_k141_283220 | 34186 No | NA | 16 | 1  | High-quality   | Genome-fragment | 95.51 | 0 |
| S17_k141_194942                      | 1136 No  | NA | 0  | 1  | Low-quality    | Genome-fragment | 0.89  | 0 |
| S11-final-viral-combined_k141_7143   | 2117 No  | NA | 0  | 0  | Not-determined | Genome-fragment | NA    | 0 |
| S12-final-viral-combined_k141_353053 | 1136 No  | NA | 0  | 0  | Low-quality    | Genome-fragment | 1.67  | 0 |
| S4-final-viral-combined_k141_159776  | 1136 No  | NA | 0  | 0  | Low-quality    | Genome-fragment | 2.94  | 0 |
| S11-final-viral-combined_k141_214061 | 1426 No  | NA | 0  | 0  | Not-determined | Genome-fragment | NA    | 0 |
| S11-final-viral-combined_k141_62588  | 1396 No  | NA | 0  | 1  | Not-determined | Genome-fragment | NA    | 0 |
| S6-final-viral-combined_k141_82804   | 1136 No  | NA | 1  | 0  | Low-quality    | Genome-fragment | 1.31  | 0 |
| S11-final-viral-combined_k141_24753  | 1418 No  | NA | 0  | 0  | Not-determined | Genome-fragment | NA    | 0 |
| S11-final-viral-combined_k141_214378 | 1514 No  | NA | 0  | 2  | Not-determined | Genome-fragment | NA    | 0 |
| S11-final-viral-combined_k141_104191 | 11212 No | NA | 0  | 5  | Not-determined | Genome-fragment | NA    | 0 |
| S11-final-viral-combined_k141_75425  | 2411 No  | NA | 0  | 0  | Not-determined | Genome-fragment | NA    | 0 |
| S11-final-viral-combined_k141_242159 | 1382 No  | NA | 0  | 1  | Not-determined | Genome-fragment | NA    | 0 |
| S11-final-viral-combined_k141_212074 | 1137 No  | NA | 0  | 0  | Low-quality    | Genome-fragment | 2.47  | 0 |
| S4-final-viral-combined_k141_88030   | 1137 No  | NA | 0  | 0  | Low-quality    | Genome-fragment | 2.76  | 0 |
| S11-final-viral-combined_k141_72011  | 1488 No  | NA | 0  | 1  | Not-determined | Genome-fragment | NA    | 0 |
| S1-final-viral-combined_k141_192250  | 1137 No  | NA | 0  | 1  | Low-quality    | Genome-fragment | 0.95  | 0 |
| S11-final-viral-combined_k141_296193 | 1027 No  | NA | 0  | 0  | Not-determined | Genome-fragment | NA    | 0 |
| S1_k141_158589                       | 1137 No  | NA | 2  | 0  | Low-quality    | Genome-fragment | 2.09  | 0 |
| S11-final-viral-combined_k141_62642  | 1283 No  | NA | 0  | 0  | Not-determined | Genome-fragment | NA    | 0 |
| S5_k141_150561                       | 1137 No  | NA | 0  | 1  | Low-quality    | Genome-fragment | 0.76  | 0 |
| S11-final-viral-combined_k141_242200 | 7074 No  | NA | 0  | 7  | Not-determined | Genome-fragment | NA    | 0 |
| S11-final-viral-combined_k141_116729 | 1169 No  | NA | 0  | 2  | Not-determined | Genome-fragment | NA    | 0 |
| S11-final-viral-combined_k141_34814  | 1159 No  | NA | 0  | 1  | Not-determined | Genome-fragment | NA    | 0 |
| S11-final-viral-combined_k141_145311 | 2950 No  | NA | 0  | 3  | Not-determined | Genome-fragment | NA    | 0 |
| S11-final-viral-combined_k141_281286 | 1313 No  | NA | 0  | 2  | Not-determined | Genome-fragment | NA    | 0 |
| S7-final-viral-combined_k141_100936  | 1137 No  | NA | 2  | 0  | Low-quality    | Genome-fragment | 2.56  | 0 |
| S11-final-viral-combined_k141_172889 | 29228 No | NA | 9  | 0  | Medium-quality | Genome-fragment | 55.57 | 0 |
| S17-final-viral-combined_k141_24386  | 1137 No  | NA | 0  | 0  | Low-quality    | Genome-fragment | 0.63  | 0 |
| S11-final-viral-combined_k141_214450 | 1334 No  | NA | 0  | 1  | Not-determined | Genome-fragment | NA    | 0 |
| S17-final-viral-combined_k141_99992  | 1137 No  | NA | 0  | 3  | Low-quality    | Genome-fragment | 0.33  | 0 |
| S17-final-viral-combined_k141_197082 | 1137 No  | NA | 1  | 0  | Low-quality    | Genome-fragment | 3.12  | 0 |
| S11-final-viral-combined_k141_130828 | 3411 No  | NA | 0  | 0  | Not-determined | Genome-fragment | NA    | 0 |
| S12-final-viral-combined_k141_18143  | 1137 No  | NA | 0  | 1  | Low-quality    | Genome-fragment | 2.04  | 0 |
| S11-final-viral-combined_k141_62713  | 2241 No  | NA | 0  | 3  | Not-determined | Genome-fragment | NA    | 0 |
| S2-final-viral-combined_k141_137135  | 1137 No  | NA | 0  | 0  | Low-quality    | Genome-fragment | 2.81  | 0 |
| S6-final-viral-combined_k141_109618  | 1137 No  | NA | 1  | 0  | Low-quality    | Genome-fragment | 4     | 0 |
| S11-final-viral-combined_k141_20306  | 2660 No  | NA | 0  | 1  | Not-determined | Genome-fragment | NA    | 0 |
| S11-final-viral-combined_k141_255547 | 1815 No  | NA | 0  | 2  | Not-determined | Genome-fragment | NA    | 0 |
| S11-final-viral-combined_k141_130848 | 6171 No  | NA | 0  | 5  | Not-determined | Genome-fragment | NA    | 0 |
| S11-final-viral-combined_k141_158946 | 3921 No  | NA | 0  | 2  | Not-determined | Genome-fragment | NA    | 0 |
| S11-final-viral-combined_k141_89888  | 1621 No  | NA | 0  | 2  | Not-determined | Genome-fragment | NA    | 0 |
| S11-final-viral-combined_k141_298287 | 1707 No  | NA | 0  | 1  | Not-determined | Genome-fragment | NA    | 0 |
| S11-final-viral-combined_k141_145188 | 1882 No  | NA | 0  | 2  | Not-determined | Genome-fragment | NA    | 0 |
| S11-final-viral-combined_k141_145195 | 1171 No  | NA | 0  | 2  | Not-determined | Genome-fragment | NA    | 0 |
| S11-final-viral-combined_k141_627401 | 3443 No  | NA | 0  | 2  | Not-determined | Genome-fragment | NA    | 0 |
| S11-final-viral-combined_k141_172953 | 3342 No  | NA | 0  | 2  | Not-determined | Genome-fragment | NA    | 0 |
| S11-final-viral-combined_k141_168967 | 17804 No | NA | 11 | 0  | Medium-quality | Genome-fragment | 50.48 | 0 |
| S11-final-viral-combined_k141_114309 | 1138 No  | NA | 0  | 1  | Low-quality    | Genome-fragment | 2.37  | 0 |
| S1-final-viral-combined_k141_95384   | 1138 No  | NA | 1  | 0  | Low-quality    | Genome-fragment | 2.62  | 0 |
| S11-final-viral-combined_k141_199715 | 1469 No  | NA | 0  | 1  | Not-determined | Genome-fragment | NA    | 0 |
| S11-final-viral-combined_k141_130858 | 4004 No  | NA | 0  | 1  | Not-determined | Genome-fragment | NA    | 0 |
| S11-final-viral-combined_k141_34911  | 2471 No  | NA | 0  | 1  | Not-determined | Genome-fragment | NA    | 0 |
| S11-final-viral-combined_k141_172968 | 4215 No  | NA | 0  | 2  | Not-determined | Genome-fragment | NA    | 0 |
| S11-final-viral-combined_k141_75613  | 7842 No  | NA | 0  | 5  | Not-determined | Genome-fragment | NA    | 0 |
| S11-final-viral-combined_k141_627952 | 1426 No  | NA | 0  | 0  | Not-determined | Genome-fragment | NA    | 0 |
| S7_k141_129436                       | 1138 No  | NA | 0  | 0  | Low-quality    | Genome-fragment | 8.43  | 0 |
| S11-final-viral-combined_k141_116860 | 4752 No  | NA | 0  | 2  | Not-determined | Genome-fragment | NA    | 0 |
| S11-final-viral-combined_k141_255630 | 1254 No  | NA | 0  | 0  | Not-determined | Genome-fragment | NA    | 0 |
| S17-final-viral-combined_k141_143518 | 1138 No  | NA | 1  | 0  | Low-quality    | Genome-fragment | 3.18  | 0 |
| S12-final-viral-combined_k141_224099 | 1138 No  | NA | 0  | 0  | Low-quality    | Genome-fragment | 2.08  | 0 |
| S12-final-viral-combined_k141_192011 | 1138 No  | NA | 0  | 0  | Low-quality    | Genome-fragment | 2.39  | 0 |
| S11-final-viral-combined_k141_173006 | 1185 No  | NA | 0  | 1  | Not-determined | Genome-fragment | NA    | 0 |
| S11-final-viral-combined_k141_255672 | 1737 No  | NA | 0  | 1  | Not-determined | Genome-fragment | NA    | 0 |
| S11-final-viral-combined_k141_199781 | 3534 No  | NA | 0  | 2  | Not-determined | Genome-fragment | NA    | 0 |
| S11-final-viral-combined_k141_296376 | 2750 No  | NA | 0  | 2  | Not-determined | Genome-fragment | NA    | 0 |
| S11-final-viral-combined_k141_48581  | 2864 No  | NA | 0  | 0  | Not-determined | Genome-fragment | NA    | 0 |
| S8_k141_243122                       | 1138 No  | NA | 0  | 0  | Low-quality    | Genome-fragment | 2.38  | 0 |
| S11-final-viral-combined_k141_130913 | 1689 No  | NA | 0  | 0  | Not-determined | Genome-fragment | NA    | 0 |
| S11-final-viral-combined_k141_186079 | 1778 No  | NA | 0  | 2  | Not-determined | Genome-fragment | NA    | 0 |
| S11-final-viral-combined_k141_104323 | 10685 No | NA | 0  | 6  | Not-determined | Genome-fragment | NA    | 0 |
| S9-final-viral-combined_k141_125289  | 1139 No  | NA | 1  | 0  | Low-quality    | Genome-fragment | 0.78  | 0 |
| S11-final-viral-combined_k141_35001  | 5316 No  | NA | 0  | 0  | Not-determined | Genome-fragment | NA    | 0 |
| S11-final-viral-combined_k141_255685 | 22563 No | NA | 0  | 18 | Not-determined | Genome-fragment | NA    | 0 |
| S11-final-viral-combined_k141_104339 | 3068 No  | NA | 0  | 2  | Not-determined | Genome-fragment | NA    | 0 |
| S11-final-viral-combined_k141_281452 | 1630 No  | NA | 0  | 0  | Not-determined | Genome-fragment | NA    | 0 |
| S11-final-viral-combined_k141_201510 | 1139 No  | NA | 0  | 0  | Low-quality    | Genome-fragment | 1.31  | 0 |
| S11-final-viral-combined_k141_242389 | 3488 No  | NA | 0  | 2  | Not-determined | Genome-fragment | NA    | 0 |
| S11-final-viral-combined_k141_246599 | 1139 No  | NA | 0  | 0  | Low-quality    | Genome-fragment | 2.47  | 0 |
| S11-final-viral-combined_k141_75697  | 1284 No  | NA | 0  | 1  | Not-determined | Genome-fragment | NA    | 0 |
| S11-final-viral-combined_k141_116954 | 1970 No  | NA | 0  | 0  | Not-determined | Genome-fragment | NA    | 0 |
| S11-final-viral-combined_k141_199834 | 1121 No  | NA | 0  | 0  | Not-determined | Genome-fragment | NA    | 0 |
| S11-final-viral-combined_k141_186127 | 1205 No  | NA | 0  | 1  | Not-determined | Genome-fragment | NA    | 0 |
| S11-final-viral-combined_k141_255749 | 2763 No  | NA | 0  | 1  | Not-determined | Genome-fragment | NA    | 0 |
| S11-final-viral-combined_k141_104371 | 2909 No  | NA | 0  | 0  | Not-determined | Genome-fragment | NA    | 0 |
| S11_k141_244342                      | 1139 No  | NA | 0  | 0  | Low-quality    | Genome-fragment | 3.8   | 0 |
| S11-final-viral-combined_k141_131016 | 2256 No  | NA | 0  | 1  | Not-determined | Genome-fragment | NA    | 0 |
| S5_k141_186479                       | 1139 No  | NA | 2  | 0  | Low-quality    | Genome-fragment | 1.89  | 0 |
| S11-final-viral-combined_k141_296361 | 5205 No  | NA | 0  | 1  | Not-determined | Genome-fragment | NA    | 0 |
| S17-final-viral-combined_k141_201413 | 1139 No  | NA | 2  | 0  | Low-quality    | Genome-fragment | 2.6   | 0 |
| S17_k141_158073                      | 1139 No  | NA | 2  | 0  | Low-quality    | Genome-fragment | 2.23  | 0 |
| S11-final-viral-combined_k141_7443   | 1660 No  | NA | 0  | 2  | Not-determined | Genome-fragment | NA    | 0 |
| S11-final-viral-combined_k141_311182 | 2012 No  | NA | 0  | 0  | Not-determined | Genome-fragment | NA    | 0 |
| S12-final-viral-combined_k141_21169  | 1139 No  | NA | 1  | 0  | Low-quality    | Genome-fragment | 1.98  | 0 |
| S11-final-viral-combined_k141_35124  | 3379 No  | NA | 0  | 1  | Not-determined | Genome-fragment | NA    | 0 |
| S12_k141_352897                      | 1139 No  | NA | 0  | 0  | Low-quality    | Genome-fragment | 4.1   | 0 |
| S12_k141_363578                      | 1139 No  | NA | 1  | 0  | Low-quality    | Genome-fragment | 15.26 | 0 |
| S11-final-viral-combined_k141_35138  | 1528 No  | NA | 0  | 1  | Not-determined | Genome-fragment | NA    | 0 |
| S11-final-viral-combined_k141_296361 | 2612 No  | NA | 0  | 1  | Not-determined | Genome-fragment | NA    | 0 |
| S11-final-viral-combined_k141_75797  | 2701 No  | NA | 0  | 2  | Not-determined | Genome-fragment | NA    | 0 |
| S2-final-viral-combined_k141_189136  | 1139 No  | NA | 1  | 0  | Low-quality    | Genome-fragment | 1.66  | 0 |
| S2_k141_218123                       | 1139 No  | NA | 0  | 0  | Low-quality    | Genome-fragment | 2.22  | 0 |
| S11-final-viral-combined_k141_214759 | 1140 No  | NA | 0  | 0  | Low-quality    | Genome-fragment | 2.52  | 0 |
| S11_k141_313893                      | 1140 No  | NA | 0  | 1  | Low-quality    | Genome-fragment | 1.1   | 0 |
| S1_k141_143386                       | 1140 No  | NA | 0  | 0  | Low-quality    | Genome-fragment | 3.01  | 0 |
| S11-final-viral-combined_k141_35175  | 1863 No  | NA | 0  | 0  | Not-determined | Genome-fragment | NA    | 0 |
| S5-final-viral-combined_k141_138505  | 1140 No  | NA | 0  | 0  | Low-quality    | Genome-fragment | 0.72  | 0 |
| S7-final-viral-combined_k141_194127  | 1140 No  | NA | 1  | 0  | Low-quality    | Genome-fragment | 1.72  | 0 |
| S11-final-viral-combined_k141_173218 | 2864 No  | NA | 0  | 2  | Not-determined | Genome-fragment | NA    | 0 |
| S11-final-viral-combined_k141_323612 | 5764 No  | NA | 0  | 3  | Not-determined | Genome-fragment | NA    | 0 |
| S11-final-viral-combined_k141_173230 | 1664 No  | NA | 0  | 2  | Not-determined | Genome-fragment | NA    | 0 |
| S7-final-viral-combined_k141_176010  | 1140 No  | NA | 0  | 0  | Low-quality    | Genome-fragment | 1.75  | 0 |
| S7-final-viral-combined_k141_234223  | 1140 No  | NA | 1  | 0  | Low-quality    | Genome-fragment | 3.34  | 0 |
| S11-final-viral-combined_k141_117121 | 4319 No  | NA | 0  | 2  | Not-determined | Genome-fragment | NA    | 0 |
| S17-final-viral-combined_k141_152468 | 1140 No  | NA | 0  | 0  | Low-quality    | Genome-fragment | 1.43  | 0 |
| S11-final-viral-combined_k141_159198 | 11160 No | NA | 0  | 9  | Not-determined | Genome-fragment | NA    | 0 |
| S11-final-viral-combined_k141_214692 | 5415 No  | NA | 0  | 2  | Not-determined | Genome-fragment | NA    | 0 |
| S17-final-viral-combined_k141_188853 | 1140 No  | NA | 0  | 1  | Low-quality    | Genome-fragment | 1.46  | 0 |
| S17_k141_313285                      | 1140 No  | NA | 0  | 1  | Low-quality    | Genome-fragment | 0.37  | 0 |
| S11-final-viral-combined_k141_35275  | 1198 No  | NA | 0  | 2  | Not-determined | Genome-fragment | NA    | 0 |
| S11-final-viral-combined_k141_242624 | 6531 No  | NA | 0  | 4  | Not-determined | Genome-fragment | NA    | 0 |
| S12-final-viral-combined_k141_234669 | 1140 No  | NA | 0  | 0  | Low-quality    | Genome-fragment | 1.94  | 0 |
| S12-final-viral-combined_k141_199995 | 1140 No  | NA | 0  | 1  | Low-quality    | Genome-fragment | 0.34  | 0 |
| S11-final-viral-combined_k141_228262 | 1537 No  | NA | 0  | 1  | Not-determined | Genome-fragment | NA    | 0 |
| S11-final-viral-combined_k141_311294 | 1112 No  | NA | 0  | 0  | Not-determined | Genome-fragment | NA    | 0 |
| S2-final-viral-combined_k141_234088  | 1140 No  | NA | 0  | 2  | Low-quality    | Genome-fragment | 0.64  | 0 |
| S4-final-viral-combined_k141_62016   | 1140 No  | NA | 0  | 0  | Low-quality    | Genome-fragment | 3.04  | 0 |
| S11-final-viral-combined_k141_173141 | 5297 No  | NA | 0  | 3  | Not-determined | Genome-fragment | NA    | 0 |
| S4_k141_155938                       | 1140 No  | NA | 1  | 0  | Low-quality    | Genome-fragment | 1.38  | 0 |
| S8-final-viral-combined_k141_184476  | 1140 No  | NA | 0  | 1  | Low-quality    | Genome-fragment | 1.67  | 0 |
| S8_k141_20114                        | 1140 No  | NA | 0  | 1  | Low-quality    | Genome-fragment | 0.7   | 0 |
| S11-final-viral-com                  |          |    |    |    |                |                 |       |   |



|                                       |          |       |      |     |    |   |                |                 |       |       |
|---------------------------------------|----------|-------|------|-----|----|---|----------------|-----------------|-------|-------|
| S11-final-viral-combined_k141_1375111 | [full]   | 1852  | No   | NA  | 0  | 2 | Not-determined | Genome-fragment | NA    | 0     |
| S11-final-viral-combined_k141_1686    | [full]   | 1358  | No   | NA  | 0  | 1 | Not-determined | Genome-fragment | NA    | 0     |
| S11-final-viral-combined_k141_214891  | [full]   | 1593  | No   | NA  | 0  | 1 | Not-determined | Genome-fragment | NA    | 0     |
| S9-final-viral-combined_k141_91439    | [full]   | 1142  | Yes  | 553 | 2  | 1 | Low-quality    | Genome-fragment | 1.46  | 51.58 |
| S11-final-viral-combined_k141_93199   | [full]   | 1240  | No   | NA  | 0  | 0 | Not-determined | Genome-fragment | NA    | 0     |
| S11-final-viral-combined_k141_231969  | [full]   | 1462  | No   | NA  | 0  | 1 | Low-quality    | Genome-fragment | 1.95  | 0     |
| S11-final-viral-combined_k141_104672  | [full]   | 1662  | No   | NA  | 0  | 1 | Not-determined | Genome-fragment | NA    | 0     |
| S11-final-viral-combined_k141_228417  | [full]   | 3415  | No   | NA  | 0  | 0 | Not-determined | Genome-fragment | NA    | 0     |
| S11-final-viral-combined_k141_283660  | [full]   | 1668  | No   | NA  | 0  | 1 | Not-determined | Genome-fragment | NA    | 0     |
| S1_k141_335417                        |          | 1142  | No   | NA  | 0  | 1 | Low-quality    | Genome-fragment | 0.45  | 0     |
| S11-final-viral-combined_k141_35521   | [full]   | 1395  | No   | NA  | 0  | 1 | Not-determined | Genome-fragment | NA    | 0     |
| S11-final-viral-combined_k141_104703  | [full]   | 2241  | No   | NA  | 0  | 3 | Not-determined | Genome-fragment | NA    | 0     |
| S11-final-viral-combined_k141_296844  | [full]   | 2650  | No   | NA  | 0  | 1 | Not-determined | Genome-fragment | NA    | 0     |
| S11-final-viral-combined_k141_35532   | [full]   | 2050  | No   | NA  | 0  | 1 | Not-determined | Genome-fragment | NA    | 0     |
| S11-final-viral-combined_k141_117370  | [full]   | 2550  | No   | NA  | 0  | 1 | Not-determined | Genome-fragment | NA    | 0     |
| S11-final-viral-combined_k141_155502  | [full]   | 1705  | No   | NA  | 0  | 2 | Not-determined | Genome-fragment | NA    | 0     |
| S5-final-viral-combined_k141_142196   | [full]   | 1142  | No   | NA  | 0  | 1 | Low-quality    | Genome-fragment | 0.75  | 0     |
| S11-final-viral-combined_k141_173590  | [full]   | 17118 | No   | NA  | 0  | 5 | Not-determined | Genome-fragment | NA    | 0     |
| S11-final-viral-combined_k141_117394  | [full]   | 2322  | No   | NA  | 0  | 2 | Not-determined | Genome-fragment | NA    | 0     |
| S11-final-viral-combined_k141_228485  | [full]   | 2400  | No   | NA  | 0  | 2 | Not-determined | Genome-fragment | NA    | 0     |
| S11-final-viral-combined_k141_145644  | [full]   | 3018  | No   | NA  | 0  | 2 | Not-determined | Genome-fragment | NA    | 0     |
| S7-final-viral-combined_k141_47799    | [full]   | 1142  | No   | NA  | 0  | 0 | Low-quality    | Genome-fragment | 2.24  | 0     |
| S11-final-viral-combined_k141_296893  | [full]   | 9369  | No   | NA  | 0  | 0 | Not-determined | Genome-fragment | NA    | 0     |
| S11-final-viral-combined_k141_173605  | [full]   | 1313  | No   | NA  | 0  | 0 | Not-determined | Genome-fragment | NA    | 0     |
| S11-final-viral-combined_k141_63289   | [full]   | 2413  | No   | NA  | 0  | 2 | Not-determined | Genome-fragment | NA    | 0     |
| S7_k141_215898                        |          | 1142  | No   | NA  | 0  | 0 | Low-quality    | Genome-fragment | 2.69  | 0     |
| S12-final-viral-combined_k141_260760  | [full]   | 1142  | No   | NA  | 0  | 0 | Low-quality    | Genome-fragment | 2.28  | 0     |
| S2-final-viral-combined_k141_146034   | [full]   | 1142  | No   | NA  | 1  | 0 | Low-quality    | Genome-fragment | 1.92  | 0     |
| S11-final-viral-combined_k141_79131   | [full]   | 1362  | No   | NA  | 0  | 2 | Not-determined | Genome-fragment | NA    | 0     |
| S2-final-viral-combined_k141_260670   | [full]   | 1142  | No   | NA  | 0  | 2 | Low-quality    | Genome-fragment | 0.35  | 0     |
| S11-final-viral-combined_k141_323901  | [full]   | 1548  | No   | NA  | 0  | 3 | Not-determined | Genome-fragment | NA    | 0     |
| S11-final-viral-combined_k141_31546   | [full]   | 4490  | No   | NA  | 0  | 5 | Not-determined | Genome-fragment | NA    | 0     |
| S2_k141_199357                        |          | 1142  | No   | NA  | 0  | 1 | Low-quality    | Genome-fragment | 1.95  | 0     |
| S6-final-viral-combined_k141_133134   | [full]   | 1142  | No   | NA  | 0  | 0 | Low-quality    | Genome-fragment | 0.62  | 0     |
| S11-final-viral-combined_k141_30574   | [full]   | 3545  | No   | NA  | 0  | 3 | Not-determined | Genome-fragment | NA    | 0     |
| S6-final-viral-combined_k141_108236   | [H2gene] | 1142  | No   | NA  | 0  | 1 | Not-determined | Genome-fragment | 2.51  | 0     |
| S11-final-viral-combined_k141_7955    | [full]   | 7709  | No   | NA  | 0  | 4 | Not-determined | Genome-fragment | NA    | 0     |
| S11-final-viral-combined_k141_159604  | [full]   | 3133  | No   | NA  | 0  | 0 | Not-determined | Genome-fragment | NA    | 0     |
| S6_k141_2392                          |          | 1142  | No   | NA  | 0  | 0 | Low-quality    | Genome-fragment | 0.21  | 0     |
| S11-final-viral-combined_k141_296954  | [full]   | 1157  | No   | NA  | 0  | 1 | Not-determined | Genome-fragment | NA    | 0     |
| S11-final-viral-combined_k141_269656  | [full]   | 3411  | No   | NA  | 0  | 2 | Not-determined | Genome-fragment | NA    | 0     |
| S1-final-viral-combined_k141_146034   | [full]   | 1143  | No   | NA  | 0  | 0 | Not-determined | Genome-fragment | 1.05  | 0     |
| S11-final-viral-combined_k141_242964  | [full]   | 5761  | No   | NA  | 0  | 0 | Not-determined | Genome-fragment | NA    | 0     |
| S1-final-viral-combined_k141_371734   | [full]   | 1143  | No   | NA  | 0  | 0 | Low-quality    | Genome-fragment | 2.53  | 0     |
| S1-final-viral-combined_k141_158852   | [full]   | 1143  | No   | NA  | 1  | 0 | Low-quality    | Genome-fragment | 2.51  | 0     |
| S11-final-viral-combined_k141_269678  | [full]   | 2686  | No   | NA  | 0  | 1 | Not-determined | Genome-fragment | NA    | 0     |
| S11-final-viral-combined_k141_269680  | [full]   | 1653  | No   | NA  | 0  | 0 | Not-determined | Genome-fragment | NA    | 0     |
| S11-final-viral-combined_k141_30610   | [full]   | 1682  | No   | NA  | 0  | 2 | Not-determined | Genome-fragment | NA    | 0     |
| S11-final-viral-combined_k141_131398  | [full]   | 1828  | No   | NA  | 0  | 1 | Not-determined | Genome-fragment | NA    | 0     |
| S5_k141_122453                        |          | 1143  | No   | NA  | 1  | 0 | Low-quality    | Genome-fragment | 2.65  | 0     |
| S11-final-viral-combined_k141_63359   | [full]   | 1301  | No   | NA  | 0  | 0 | Not-determined | Genome-fragment | NA    | 0     |
| S11-final-viral-combined_k141_117325  | [full]   | 1414  | No   | NA  | 0  | 2 | Not-determined | Genome-fragment | NA    | 0     |
| S11-final-viral-combined_k141_242986  | [full]   | 2632  | No   | NA  | 0  | 3 | Not-determined | Genome-fragment | NA    | 0     |
| S12-final-viral-combined_k141_143857  | [full]   | 1143  | No   | NA  | 0  | 0 | Low-quality    | Genome-fragment | 2.86  | 0     |
| S11-final-viral-combined_k141_49206   | [full]   | 1023  | No   | NA  | 0  | 0 | Not-determined | Genome-fragment | NA    | 0     |
| S11-final-viral-combined_k141_134414  | [full]   | 2757  | No   | NA  | 0  | 1 | Not-determined | Genome-fragment | NA    | 0     |
| S11-final-viral-combined_k141_20818   | [full]   | 2660  | No   | NA  | 0  | 2 | Not-determined | Genome-fragment | NA    | 0     |
| S12_k141_357386                       |          | 1143  | No   | NA  | 0  | 0 | Low-quality    | Genome-fragment | 0.61  | 0     |
| S8_k141_155572                        |          | 1143  | No   | NA  | 1  | 0 | Low-quality    | Genome-fragment | 1.79  | 0     |
| S9-final-viral-combined_k141_123414   | [full]   | 1144  | No   | NA  | 1  | 0 | Low-quality    | Genome-fragment | 1.73  | 0     |
| S11-final-viral-combined_k141_269992  | [full]   | 1065  | No   | NA  | 0  | 1 | Not-determined | Genome-fragment | NA    | 0     |
| S5-final-viral-combined_k141_71809    | [full]   | 1144  | No   | NA  | 0  | 2 | Low-quality    | Genome-fragment | 0.45  | 0     |
| S5-final-viral-combined_k141_24756    | [full]   | 1144  | No   | NA  | 0  | 0 | Low-quality    | Genome-fragment | 0.98  | 0     |
| S5_k141_30386                         |          | 1144  | No   | NA  | 2  | 0 | Low-quality    | Genome-fragment | 3.46  | 0     |
| S11-final-viral-combined_k141_215046  | [full]   | 1458  | No   | NA  | 0  | 1 | Not-determined | Genome-fragment | NA    | 0     |
| S11-final-viral-combined_k141_145757  | [full]   | 2332  | No   | NA  | 0  | 2 | Not-determined | Genome-fragment | NA    | 0     |
| S12-final-viral-combined_k141_343544  | [full]   | 1144  | No   | NA  | 0  | 0 | Low-quality    | Genome-fragment | 2.52  | 0     |
| S11-final-viral-combined_k141_131470  | [full]   | 3303  | No   | NA  | 0  | 1 | Not-determined | Genome-fragment | NA    | 0     |
| S11-final-viral-combined_k141_200511  | [full]   | 1472  | No   | NA  | 0  | 0 | Not-determined | Genome-fragment | NA    | 0     |
| S2-final-viral-combined_k141_21377    | [full]   | 1144  | No   | NA  | 0  | 0 | Low-quality    | Genome-fragment | 2.19  | 0     |
| S11-final-viral-combined_k141_8117    | [full]   | 2044  | No   | NA  | 0  | 0 | Not-determined | Genome-fragment | NA    | 0     |
| S11-final-viral-combined_k141_117373  | [full]   | 2773  | No   | NA  | 0  | 1 | Not-determined | Genome-fragment | NA    | 0     |
| S11-final-viral-combined_k141_104971  | [full]   | 1890  | No   | NA  | 0  | 1 | Not-determined | Genome-fragment | NA    | 0     |
| S11-final-viral-combined_k141_200553  | [full]   | 3028  | No   | NA  | 0  | 2 | Not-determined | Genome-fragment | NA    | 0     |
| S11-final-viral-combined_k141_30741   | [full]   | 1156  | No   | NA  | 0  | 0 | Not-determined | Genome-fragment | NA    | 0     |
| S11-final-viral-combined_k141_215112  | [full]   | 1617  | No   | NA  | 0  | 0 | Not-determined | Genome-fragment | NA    | 0     |
| S11-final-viral-combined_k141_20887   | [full]   | 12109 | No   | NA  | 0  | 6 | Not-determined | Genome-fragment | NA    | 0     |
| S4-final-viral-combined_k141_127595   | [full]   | 1144  | No   | NA  | 0  | 0 | Low-quality    | Genome-fragment | 2.62  | 0     |
| S11-final-viral-combined_k141_8815    | [full]   | 1445  | No   | NA  | 0  | 0 | Low-quality    | Genome-fragment | 1.9   | 0     |
| S11-final-viral-combined_k141_30765   | [full]   | 3339  | No   | NA  | 0  | 1 | Not-determined | Genome-fragment | NA    | 0     |
| S11-final-viral-combined_k141_206580  | [full]   | 5103  | No   | NA  | 0  | 0 | Not-determined | Genome-fragment | NA    | 0     |
| S11-final-viral-combined_k141_220740  | [full]   | 2133  | No   | NA  | 0  | 2 | Not-determined | Genome-fragment | NA    | 0     |
| S11-final-viral-combined_k141_32024   | [H2gene] | 1145  | No   | NA  | 2  | 0 | Low-quality    | Genome-fragment | 3.28  | 0     |
| S11-final-viral-combined_k141_131561  | [full]   | 1244  | No   | NA  | 0  | 1 | Not-determined | Genome-fragment | NA    | 0     |
| S1_k141_29737                         |          | 1145  | No   | NA  | 0  | 0 | Low-quality    | Genome-fragment | 1.44  | 0     |
| S11-final-viral-combined_k141_145831  | [full]   | 2401  | No   | NA  | 0  | 1 | Not-determined | Genome-fragment | NA    | 0     |
| S3-final-viral-combined_k141_64919    | [full]   | 1145  | No   | NA  | 0  | 0 | Low-quality    | Genome-fragment | 2.73  | 0     |
| S3-final-viral-combined_k141_59557    | [full]   | 1145  | No   | NA  | 0  | 1 | Low-quality    | Genome-fragment | 0.6   | 0     |
| S5_k141_190390                        |          | 1145  | No   | NA  | 0  | 1 | Low-quality    | Genome-fragment | 0.76  | 0     |
| S11-final-viral-combined_k141_76369   | [full]   | 2922  | No   | NA  | 0  | 3 | Not-determined | Genome-fragment | NA    | 0     |
| S11-final-viral-combined_k141_215154  | [full]   | 1025  | No   | NA  | 0  | 1 | Not-determined | Genome-fragment | NA    | 0     |
| S11-final-viral-combined_k141_145880  | [full]   | 3310  | No   | NA  | 0  | 2 | Not-determined | Genome-fragment | NA    | 0     |
| S11-final-viral-combined_k141_186860  | [full]   | 2860  | No   | NA  | 0  | 1 | Not-determined | Genome-fragment | NA    | 0     |
| S7_k141_113281                        |          | 1145  | No   | NA  | 0  | 0 | Low-quality    | Genome-fragment | 0.81  | 0     |
| S11-final-viral-combined_k141_150741  | [full]   | 6106  | No   | NA  | 0  | 4 | Not-determined | Genome-fragment | NA    | 0     |
| S11-final-viral-combined_k141_35854   | [full]   | 2952  | No   | NA  | 0  | 0 | Not-determined | Genome-fragment | NA    | 0     |
| S11-final-viral-combined_k141_76407   | [full]   | 5055  | No   | NA  | 0  | 2 | Not-determined | Genome-fragment | NA    | 0     |
| S17-final-viral-combined_k141_128478  | [full]   | 1145  | No   | NA  | 1  | 0 | Low-quality    | Genome-fragment | 2.69  | 0     |
| S17-final-viral-combined_k141_166560  | [full]   | 1145  | No   | NA  | 0  | 1 | Low-quality    | Genome-fragment | 2.37  | 0     |
| S11-final-viral-combined_k141_76408   | [full]   | 10091 | No   | NA  | 0  | 6 | Not-determined | Genome-fragment | NA    | 0     |
| S11-final-viral-combined_k141_269903  | [full]   | 19350 | No   | NA  | 0  | 7 | Not-determined | Genome-fragment | NA    | 0     |
| S12-final-viral-combined_k141_307092  | [full]   | 1145  | No   | NA  | 0  | 1 | Low-quality    | Genome-fragment | 3.12  | 0     |
| S12-final-viral-combined_k141_78936   | [full]   | 1145  | No   | NA  | 0  | 0 | Low-quality    | Genome-fragment | 2.5   | 0     |
| S11-final-viral-combined_k141_76437   | [full]   | 1252  | No   | NA  | 0  | 0 | Not-determined | Genome-fragment | NA    | 0     |
| S12-final-viral-combined_k141_104045  | [H2gene] | 1145  | No   | NA  | 0  | 0 | Low-quality    | Genome-fragment | 2.45  | 0     |
| S11-final-viral-combined_k141_186907  | [full]   | 1125  | No   | NA  | 1  | 1 | Not-determined | Genome-fragment | NA    | 0     |
| S11-final-viral-combined_k141_145957  | [full]   | 1857  | No   | NA  | 0  | 0 | Not-determined | Genome-fragment | NA    | 0     |
| S11-final-viral-combined_k141_31188   | [full]   | 1080  | No   | NA  | 0  | 0 | Not-determined | Genome-fragment | NA    | 0     |
| S2-final-viral-combined_k141_64739    | [full]   | 1145  | No   | NA  | 0  | 0 | Not-determined | Genome-fragment | 1.62  | 0     |
| S2_k141_55892                         |          | 1145  | No   | NA  | 0  | 0 | Low-quality    | Genome-fragment | 3.1   | 0     |
| S11-final-viral-combined_k141_269955  | [full]   | 1333  | No   | NA  | 0  | 2 | Not-determined | Genome-fragment | NA    | 0     |
| S11-final-viral-combined_k141_35947   | [full]   | 1070  | No   | NA  | 0  | 1 | Not-determined | Genome-fragment | NA    | 0     |
| S4_k141_164042                        |          | 1145  | No   | NA  | 0  | 1 | Low-quality    | Genome-fragment | 0.3   | 0     |
| S8-final-viral-combined_k141_109159   | [full]   | 1145  | No   | NA  | 0  | 0 | Low-quality    | Genome-fragment | 2.43  | 0     |
| S8_k141_118792                        |          | 1145  | No   | NA  | 0  | 1 | Low-quality    | Genome-fragment | 0.43  | 0     |
| S9-final-viral-combined_k141_118774   | [full]   | 1146  | No   | NA  | 1  | 0 | Low-quality    | Genome-fragment | 2.49  | 0     |
| S11-final-viral-combined_k141_117756  | [full]   | 25717 | No   | NA  | 10 | 0 | Medium-quality | Genome-fragment | 61.58 | 0     |
| S11-final-viral-combined_k141_265112  | [full]   | 1146  | No   | NA  | 0  | 0 | Low-quality    | Genome-fragment | 0.84  | 0     |
| S11-final-viral-combined_k141_25613   | [full]   | 2282  | No   | NA  | 0  | 0 | Not-determined | Genome-fragment | NA    | 0     |
| S11-final-viral-combined_k141_234153  | [full]   | 1146  | No   | NA  | 1  | 0 | Low-quality    | Genome-fragment | 2.39  | 0     |
| S11-final-viral-combined_k141_30905   | [full]   | 1663  | No   | NA  | 0  | 3 | Not-determined | Genome-fragment | NA    | 0     |
| S11-final-viral-combined_k141_156826  | [full]   | 2760  | No   | NA  | 0  | 0 | Not-determined | Genome-fragment | NA    | 0     |
| S11-final-viral-combined_k141_146039  | [full]   | 2227  | No   | NA  | 0  | 1 | Not-determined | Genome-fragment | NA    | 0     |
| S11-final-viral-combined_k141_284123  | [full]   | 2574  | No   | NA  | 0  | 1 | Not-determined | Genome-fragment | NA    | 0     |
| S11-final-viral-combined_k141_146044  | [full]   | 2736  | No   | NA  | 0  | 0 | Not-determined | Genome-fragment | NA    | 0     |
| S11-final-viral-combined_k141_324180  | [full]   | 4953  | No   | NA  | 0  | 2 | Not-determined | Genome-fragment | NA    | 0     |
| S11-final-viral-combined_k141_387585  | [full]   | 1146  | No   | NA  | 0  | 1 | Low-quality    | Genome-fragment | 1.16  | 0     |
| S11-final-viral-combined_k141_284142  | [full]   | 4145  | No   | NA  | 0  | 4 | Not-determined | Genome-fragment | NA    | 0     |
| S11-final-viral-combined_k141_13078   | [full]   | 1146  | No   | NA  | 0  | 0 | Low-quality    | Genome-fragment | 0.88  | 0     |
| S11-final-viral-combined_k141_146066  | [full]   | 2075  | No</ |     |    |   |                |                 |       |       |



|                                              |       |     |       |    |    |                |                 |       |       |
|----------------------------------------------|-------|-----|-------|----|----|----------------|-----------------|-------|-------|
| S17-final-viral-combined_k141_2265041 H2gene | 1147  | No  | NA    | 1  | 0  | Low-quality    | Genome-fragment | 2.37  | 0     |
| S12-final-viral-combined_k141_741941         | 1147  | No  | NA    | 0  | 1  | Low-quality    | Genome-fragment | 1.56  | 0     |
| S2-final-viral-combined_k141_189141          | 1147  | No  | NA    | 0  | 1  | Low-quality    | Genome-fragment | 0.98  | 0     |
| S2-final-viral-combined_k141_202360          | 1147  | No  | NA    | 0  | 1  | Low-quality    | Genome-fragment | 0.6   | 0     |
| S2-final-viral-combined_k141_122371          | 1147  | No  | NA    | 0  | 0  | Low-quality    | Genome-fragment | 2.34  | 0     |
| S11-final-viral-combined_k141_86391          | 2051  | No  | NA    | 0  | 3  | Not-determined | Genome-fragment | NA    | 0     |
| S4-final-viral-combined_k141_106803 H2gene   | 1147  | No  | NA    | 1  | 0  | Low-quality    | Genome-fragment | 2.96  | 0     |
| S8-final-viral-combined_k141_172201          | 1147  | No  | NA    | 1  | 0  | Low-quality    | Genome-fragment | 2.31  | 0     |
| S11-final-viral-combined_k141_131845         | 1743  | No  | NA    | 0  | 1  | Not-determined | Genome-fragment | NA    | 0     |
| S11-final-viral-combined_k141_49632          | 21007 | No  | NA    | 12 | 0  | Medium-quality | Genome-fragment | 56.04 | 0     |
| S11_k141_172266                              | 1148  | No  | NA    | 0  | 0  | Low-quality    | Genome-fragment | 1.52  | 0     |
| S11-final-viral-combined_k141_131846         | 5253  | No  | NA    | 0  | 4  | Not-determined | Genome-fragment | NA    | 0     |
| S11-final-viral-combined_k141_324336         | 1148  | No  | NA    | 0  | 2  | Not-determined | Genome-fragment | NA    | 0     |
| S11-final-viral-combined_k141_229055         | 4955  | No  | NA    | 0  | 5  | Not-determined | Genome-fragment | NA    | 0     |
| S11-final-viral-combined_k141_174092         | 2213  | No  | NA    | 0  | 1  | Not-determined | Genome-fragment | NA    | 0     |
| S11-final-viral-combined_k141_211871         | 6609  | No  | NA    | 0  | 6  | Not-determined | Genome-fragment | NA    | 0     |
| S11-final-viral-combined_k141_126742 H2gene  | 1148  | No  | NA    | 1  | 0  | Low-quality    | Genome-fragment | 1.39  | 0     |
| S11-final-viral-combined_k141_243426         | 2585  | No  | NA    | 0  | 2  | Not-determined | Genome-fragment | NA    | 0     |
| S11-final-viral-combined_k141_637701         | 1180  | No  | NA    | 0  | 0  | Not-determined | Genome-fragment | NA    | 0     |
| S5-final-viral-combined_k141_134834          | 1148  | No  | NA    | 1  | 0  | Low-quality    | Genome-fragment | 2.39  | 0     |
| S5-final-viral-combined_k141_130724 H2gene   | 1148  | No  | NA    | 1  | 0  | Low-quality    | Genome-fragment | 1.61  | 0     |
| S11-final-viral-combined_k141_200950         | 4449  | No  | NA    | 0  | 1  | Not-determined | Genome-fragment | NA    | 0     |
| S11-final-viral-combined_k141_21302          | 3908  | No  | NA    | 0  | 1  | Not-determined | Genome-fragment | NA    | 0     |
| S5_k141_125685                               | 1148  | No  | NA    | 1  | 0  | Low-quality    | Genome-fragment | 0.44  | 0     |
| S11-final-viral-combined_k141_76759          | 1582  | No  | NA    | 0  | 1  | Not-determined | Genome-fragment | NA    | 0     |
| S5_k141_41786                                | 1148  | No  | NA    | 0  | 1  | Low-quality    | Genome-fragment | 1.41  | 0     |
| S11-final-viral-combined_k141_324364         | 2334  | No  | NA    | 0  | 1  | Not-determined | Genome-fragment | NA    | 0     |
| S11-final-viral-combined_k141_284436         | 3035  | No  | NA    | 0  | 1  | Not-determined | Genome-fragment | NA    | 0     |
| S11-final-viral-combined_k141_76789          | 2375  | No  | NA    | 0  | 1  | Not-determined | Genome-fragment | NA    | 0     |
| S7_k141_219311                               | 1148  | Yes | 927   | 1  | 1  | Low-quality    | Genome-fragment | 0.64  | 19.25 |
| S7_k141_192318                               | 1148  | No  | NA    | 0  | 0  | Low-quality    | Genome-fragment | 2.2   | 0     |
| S17-final-viral-combined_k141_188410         | 1148  | No  | NA    | 0  | 1  | Low-quality    | Genome-fragment | 2.24  | 0     |
| S17_k141_192595                              | 1148  | No  | NA    | 0  | 0  | Low-quality    | Genome-fragment | 2.74  | 0     |
| S11-final-viral-combined_k141_201025         | 6857  | No  | NA    | 0  | 2  | Not-determined | Genome-fragment | NA    | 0     |
| S11-final-viral-combined_k141_91146          | 1652  | No  | NA    | 0  | 1  | Not-determined | Genome-fragment | NA    | 0     |
| S11-final-viral-combined_k141_91150          | 1421  | No  | NA    | 0  | 0  | Not-determined | Genome-fragment | NA    | 0     |
| S11-final-viral-combined_k141_118119         | 2202  | No  | NA    | 0  | 1  | Not-determined | Genome-fragment | NA    | 0     |
| S11-final-viral-combined_k141_284491         | 1500  | No  | NA    | 0  | 1  | Not-determined | Genome-fragment | NA    | 0     |
| S17_k141_131336                              | 1148  | No  | NA    | 0  | 0  | Low-quality    | Genome-fragment | 1.79  | 0     |
| S11-final-viral-combined_k141_187263         | 1381  | No  | NA    | 0  | 0  | Not-determined | Genome-fragment | NA    | 0     |
| S12-final-viral-combined_k141_12158 H2gene   | 1148  | No  | NA    | 1  | 0  | Low-quality    | Genome-fragment | 2.72  | 0     |
| S11-final-viral-combined_k141_174321         | 3102  | No  | NA    | 1  | 1  | Not-determined | Genome-fragment | NA    | 0     |
| S2-final-viral-combined_k141_28991 H2gene    | 1148  | No  | NA    | 1  | 0  | Low-quality    | Genome-fragment | 2.63  | 0     |
| S11-final-viral-combined_k141_118142         | 3527  | No  | NA    | 0  | 1  | Not-determined | Genome-fragment | NA    | 0     |
| S11-final-viral-combined_k141_21382          | 5263  | No  | NA    | 0  | 3  | Not-determined | Genome-fragment | NA    | 0     |
| S8-final-viral-combined_k141_156645          | 1148  | No  | NA    | 0  | 0  | Low-quality    | Genome-fragment | 2.39  | 0     |
| S8-final-viral-combined_k141_22912 H2gene    | 1148  | No  | NA    | 1  | 0  | Low-quality    | Genome-fragment | 2.78  | 0     |
| S8-final-viral-combined_k141_141761          | 1149  | No  | NA    | 1  | 0  | Low-quality    | Genome-fragment | 1.29  | 0     |
| S11-final-viral-combined_k141_105531         | 3916  | No  | NA    | 0  | 1  | Not-determined | Genome-fragment | NA    | 0     |
| S9_k141_123911                               | 1149  | No  | NA    | 0  | 0  | Low-quality    | Genome-fragment | 1.47  | 0     |
| S11-final-viral-combined_k141_51467 H2gene   | 1149  | No  | NA    | 2  | 0  | Low-quality    | Genome-fragment | 3.42  | 0     |
| S1-final-viral-combined_k141_54246           | 1149  | No  | NA    | 2  | 0  | Low-quality    | Genome-fragment | 2.68  | 0     |
| S11-final-viral-combined_k141_76887          | 12398 | No  | NA    | 0  | 3  | Not-determined | Genome-fragment | NA    | 0     |
| S1-final-viral-combined_k141_59781           | 1149  | No  | NA    | 1  | 0  | Low-quality    | Genome-fragment | 2.42  | 0     |
| S1-final-viral-combined_k141_137342 H2gene   | 1149  | No  | NA    | 1  | 0  | Low-quality    | Genome-fragment | 2.67  | 0     |
| S5-final-viral-combined_k141_133149          | 1149  | No  | NA    | 1  | 1  | Low-quality    | Genome-fragment | 2.76  | 0     |
| S11-final-viral-combined_k141_76897          | 10453 | No  | NA    | 0  | 6  | Not-determined | Genome-fragment | NA    | 0     |
| S7-final-viral-combined_k141_235968          | 1149  | No  | NA    | 1  | 1  | Low-quality    | Genome-fragment | 3     | 0     |
| S11-final-viral-combined_k141_638181         | 10046 | Yes | 52817 | 11 | 31 | Complete       | High-quality    | 107   | 47.43 |
| S17-final-viral-combined_k141_88624          | 1149  | No  | NA    | 0  | 0  | Low-quality    | Genome-fragment | 2.08  | 0     |
| S11-final-viral-combined_k141_141180 H2gene  | 1149  | No  | NA    | 1  | 1  | Not-determined | Genome-fragment | NA    | 0     |
| S11-final-viral-combined_k141_201090         | 1149  | No  | NA    | 1  | 0  | Low-quality    | Genome-fragment | 2.38  | 0     |
| S7_k141_56990                                | 1149  | No  | NA    | 0  | 0  | Low-quality    | Genome-fragment | 2.67  | 0     |
| S7_k141_172470                               | 1149  | No  | NA    | 0  | 0  | Low-quality    | Genome-fragment | 0.62  | 0     |
| S17-final-viral-combined_k141_124731         | 1149  | No  | NA    | 0  | 2  | Low-quality    | Genome-fragment | 0.38  | 0     |
| S12_k141_191658                              | 1149  | No  | NA    | 1  | 0  | Low-quality    | Genome-fragment | 3.05  | 0     |
| S2_k141_24136                                | 1149  | No  | NA    | 0  | 1  | Low-quality    | Genome-fragment | 1.87  | 0     |
| S11-final-viral-combined_k141_138185         | 1149  | No  | NA    | 0  | 2  | Not-determined | Genome-fragment | NA    | 0     |
| S11-final-viral-combined_k141_160311         | 1628  | No  | NA    | 0  | 0  | Not-determined | Genome-fragment | NA    | 0     |
| S6-final-viral-combined_k141_45959           | 1149  | No  | NA    | 1  | 0  | Low-quality    | Genome-fragment | 1.4   | 0     |
| S11-final-viral-combined_k141_638541         | 5196  | No  | NA    | 0  | 1  | Not-determined | Genome-fragment | NA    | 0     |
| S11-final-viral-combined_k141_270194         | 11651 | No  | NA    | 0  | 5  | Not-determined | Genome-fragment | NA    | 0     |
| S9_k141_61777                                | 1150  | No  | NA    | 1  | 0  | Low-quality    | Genome-fragment | 2.66  | 0     |
| S11-final-viral-combined_k141_243594         | 2264  | No  | NA    | 0  | 0  | Not-determined | Genome-fragment | NA    | 0     |
| S11-final-viral-combined_k141_146463         | 1519  | No  | NA    | 0  | 2  | Not-determined | Genome-fragment | NA    | 0     |
| S11-final-viral-combined_k141_136511         | 1150  | Yes | 730   | 1  | 1  | Low-quality    | Genome-fragment | 1.64  | 36.52 |
| S1-final-viral-combined_k141_138501          | 1150  | No  | NA    | 1  | 1  | Low-quality    | Genome-fragment | 1.93  | 0     |
| S11-final-viral-combined_k141_257023         | 1408  | No  | NA    | 0  | 1  | Not-determined | Genome-fragment | NA    | 0     |
| S11-final-viral-combined_k141_146470         | 1736  | No  | NA    | 0  | 2  | Not-determined | Genome-fragment | NA    | 0     |
| S5-final-viral-combined_k141_76541 H2gene    | 1150  | No  | NA    | 1  | 0  | Low-quality    | Genome-fragment | 1.68  | 0     |
| S5-final-viral-combined_k141_203141 H2gene   | 1150  | No  | NA    | 1  | 0  | Low-quality    | Genome-fragment | 2.91  | 0     |
| S11-final-viral-combined_k141_8931           | 4325  | No  | NA    | 0  | 6  | Not-determined | Genome-fragment | NA    | 0     |
| S7-final-viral-combined_k141_61811 H2gene    | 1150  | No  | NA    | 0  | 2  | Low-quality    | Genome-fragment | 1.05  | 0     |
| S17-final-viral-combined_k141_7761 H2gene    | 1150  | No  | NA    | 1  | 0  | Low-quality    | Genome-fragment | 2.15  | 0     |
| S17_k141_77302                               | 1150  | No  | NA    | 1  | 0  | Low-quality    | Genome-fragment | 1.68  | 0     |
| S12_k141_83915                               | 1150  | No  | NA    | 0  | 0  | Low-quality    | Genome-fragment | 0.12  | 0     |
| S11-final-viral-combined_k141_3122151        | 2213  | No  | NA    | 0  | 3  | Not-determined | Genome-fragment | NA    | 0     |
| S2_k141_243167                               | 1150  | No  | NA    | 1  | 0  | Low-quality    | Genome-fragment | 1.78  | 0     |
| S4_k141_145082                               | 1150  | No  | NA    | 0  | 1  | Low-quality    | Genome-fragment | 2.12  | 0     |
| S6-final-viral-combined_k141_58884           | 1150  | No  | NA    | 1  | 0  | Low-quality    | Genome-fragment | 1.83  | 0     |
| S8-final-viral-combined_k141_38999 H2gene    | 1151  | No  | NA    | 1  | 0  | Low-quality    | Genome-fragment | 2.29  | 0     |
| S9_k141_80562                                | 1151  | No  | NA    | 0  | 1  | Low-quality    | Genome-fragment | 0.93  | 0     |
| S1-final-viral-combined_k141_168387          | 1151  | No  | NA    | 0  | 0  | Low-quality    | Genome-fragment | 2.71  | 0     |
| S11-final-viral-combined_k141_197372         | 4317  | No  | NA    | 0  | 3  | Not-determined | Genome-fragment | NA    | 0     |
| S11-final-viral-combined_k141_284552         | 2861  | No  | NA    | 0  | 3  | Not-determined | Genome-fragment | NA    | 0     |
| S1-final-viral-combined_k141_937061          | 1151  | No  | NA    | 0  | 1  | Low-quality    | Genome-fragment | 0.52  | 0     |
| S1-final-viral-combined_k141_261365 H2gene   | 1151  | No  | NA    | 1  | 0  | Low-quality    | Genome-fragment | 3.27  | 0     |
| S11-final-viral-combined_k141_9043           | 3187  | No  | NA    | 0  | 2  | Not-determined | Genome-fragment | NA    | 0     |
| S11-final-viral-combined_k141_105710         | 1432  | No  | NA    | 0  | 0  | Not-determined | Genome-fragment | NA    | 0     |
| S11-final-viral-combined_k141_9046           | 6583  | No  | NA    | 0  | 8  | Not-determined | Genome-fragment | NA    | 0     |
| S5-final-viral-combined_k141_189961          | 1151  | No  | NA    | 1  | 1  | Low-quality    | Genome-fragment | 0.59  | 0     |
| S11-final-viral-combined_k141_364341         | 1250  | No  | NA    | 0  | 0  | Not-determined | Genome-fragment | NA    | 0     |
| S11-final-viral-combined_k141_215723         | 4981  | Yes | 42332 | 6  | 16 | High-quality   | High-quality    | 96.66 | 34.85 |
| S11-final-viral-combined_k141_2974601        | 4939  | No  | NA    | 5  | 5  | Not-determined | Genome-fragment | NA    | 0     |
| S5-final-viral-combined_k141_96375           | 1151  | No  | NA    | 0  | 1  | Low-quality    | Genome-fragment | 3.59  | 0     |
| S11-final-viral-combined_k141_284599         | 2223  | No  | NA    | 0  | 0  | Not-determined | Genome-fragment | NA    | 0     |
| S7-final-viral-combined_k141_20971           | 1151  | No  | NA    | 3  | 0  | Low-quality    | Genome-fragment | 1.9   | 0     |
| S11-final-viral-combined_k141_270331         | 4076  | No  | NA    | 1  | 0  | Not-determined | Genome-fragment | NA    | 0     |
| S7-final-viral-combined_k141_167675          | 1151  | No  | NA    | 0  | 0  | Low-quality    | Genome-fragment | 2.66  | 0     |
| S11-final-viral-combined_k141_160426         | 4055  | No  | NA    | 0  | 1  | Not-determined | Genome-fragment | NA    | 0     |
| S11-final-viral-combined_k141_640401         | 1089  | No  | NA    | 0  | 1  | Not-determined | Genome-fragment | NA    | 0     |
| S12-final-viral-combined_k141_68083          | 1151  | No  | NA    | 1  | 0  | Low-quality    | Genome-fragment | 1.56  | 0     |
| S12-final-viral-combined_k141_38424 H2gene   | 1151  | No  | NA    | 1  | 0  | Low-quality    | Genome-fragment | 1.68  | 0     |
| S11-final-viral-combined_k141_36438          | 1845  | No  | NA    | 0  | 1  | Not-determined | Genome-fragment | NA    | 0     |
| S11-final-viral-combined_k141_270355         | 5619  | No  | NA    | 0  | 4  | Not-determined | Genome-fragment | NA    | 0     |
| S11-final-viral-combined_k141_105769         | 11230 | No  | NA    | 0  | 10 | Not-determined | Genome-fragment | NA    | 0     |
| S11-final-viral-combined_k141_297696         | 2428  | No  | NA    | 0  | 1  | Not-determined | Genome-fragment | NA    | 0     |
| S11-final-viral-combined_k141_50117          | 2327  | No  | NA    | 0  | 2  | Not-determined | Genome-fragment | NA    | 0     |
| S11-final-viral-combined_k141_160470         | 8912  | No  | NA    | 0  | 4  | Not-determined | Genome-fragment | NA    | 0     |
| S12-final-viral-combined_k141_242853 H2gene  | 1151  | No  | NA    | 1  | 0  | Low-quality    | Genome-fragment | 1     | 0     |
| S11-final-viral-combined_k141_215781         | 1165  | No  | NA    | 1  | 1  | Not-determined | Genome-fragment | NA    | 0     |
| S11-final-viral-combined_k141_201355         | 1234  | No  | NA    | 0  | 0  | Not-determined | Genome-fragment | NA    | 0     |
| S11-final-viral-combined_k141_284666         | 1224  | No  | NA    | 0  | 0  | Not-determined | Genome-fragment | NA    | 0     |
| S2_k141_155384                               | 1151  | No  | NA    | 0  | 1  | Low-quality    | Genome-fragment | 0.42  | 0     |
| S2_k141_239314                               | 1151  | No  | NA    | 2  | 0  | Low-quality    | Genome-fragment | 3.19  | 0     |
| S11-final-viral-combined_k141_50186          | 1644  | No  | NA    | 0  | 2  | Not-determined | Genome-fragment | NA    | 0     |
| S11-final-viral-combined_k141_146564         | 2062  | No  | NA    | 0  | 0  | Not-determined | Genome-fragment | NA    | 0     |
| S2_k141_12252                                | 1151  | No  | NA    | 0  | 1  | Low-quality    | Genome-fragment | 0.59  | 0     |
| S2_k141_7501                                 | 1151  | No  | NA    | 0  | 1  | Low-quality    | Genome-fragment | 0.42  | 0     |
| S4-final-viral-combined_k141_154643          | 1151  | No  | NA    | 0  | 1  | Low-quality    | Genome-fragment | 2.24  | 0     |
| S4-final-viral-combined_k141_132402 H2gene   | 1151  | No  | NA    | 0  | 1  | Low-quality    | Genome-fragment | 2.63  | 0     |
| S6_k141_78117                                | 1151  | No  | NA    | 0  | 0  | Low-quality    | Genome-fragment | 1.17  | 0     |
| S11-final-viral-combined_k141_50209          | 6574  | No  | NA    | 0  | 1  | Not-determined | Genome-fragment | NA    | 0     |
| S11-final-viral-combined_k141_2571801        | 1715  | No  | NA    | 0  | 0  | Not-determined | Genome-fragment | NA    | 0     |
| S8-final-viral-combined_k141_206813          | 1151  | No  | NA    | 0  | 0  | Low-quality    | Genome-fragment | 2.69  | 0     |
| S11-final-viral-combined_k141_1184031        | 1514  | No  | NA    | 0  | 0  | Not-determined | Genome-fragment | NA    | 0     |
|                                              |       |     |       |    |    |                |                 |       |       |



|                                       |          |       |    |    |   |    |                |                 |    |       |   |
|---------------------------------------|----------|-------|----|----|---|----|----------------|-----------------|----|-------|---|
| S11-final-viral-combined_k141_2849191 | [full]   | 1464  | No | NA | 0 | 1  | Not-determined | Genome-fragment | NA | 0     | 0 |
| S11-final-viral-combined_k141_131051  | [full]   | 15504 | No | NA | 0 | 14 | Not-determined | Genome-fragment | NA | 0     | 0 |
| S2-final-viral-combined_k141_67473    | [full]   | 1153  | No | NA | 0 | 0  | Low-quality    | Genome-fragment | NA | 3.63  | 0 |
| S8-final-viral-combined_k141_134290   | [full]   | 1153  | No | NA | 0 | 0  | Low-quality    | Genome-fragment | NA | 2.14  | 0 |
| S11-final-viral-combined_k141_284937  | [full]   | 2437  | No | NA | 0 | 1  | Not-determined | Genome-fragment | NA | 0     | 0 |
| S9_k141_131081                        | [full]   | 1154  | No | NA | 1 | 0  | Low-quality    | Genome-fragment | NA | 3.14  | 0 |
| S11-final-viral-combined_k141_243951  | [full]   | 2171  | No | NA | 0 | 1  | Not-determined | Genome-fragment | NA | 0     | 0 |
| S11-final-viral-combined_k141_9436    | [H2gene] | 1154  | No | NA | 1 | 0  | Low-quality    | Genome-fragment | NA | 2.43  | 0 |
| S1-final-viral-combined_k141_144834   | [full]   | 1154  | No | NA | 1 | 0  | Low-quality    | Genome-fragment | NA | 1.91  | 0 |
| S1_k141_103405                        |          | 1154  | No | NA | 2 | 0  | Low-quality    | Genome-fragment | NA | 3.01  | 0 |
| S1_k141_356689                        |          | 1154  | No | NA | 0 | 1  | Low-quality    | Genome-fragment | NA | 0.56  | 0 |
| S3-final-viral-combined_k141_35406    | [full]   | 1154  | No | NA | 0 | 1  | Low-quality    | Genome-fragment | NA | 1.94  | 0 |
| S7-final-viral-combined_k141_193156   | [full]   | 1154  | No | NA | 0 | 0  | Low-quality    | Genome-fragment | NA | 2.84  | 0 |
| S7_k141_122108                        |          | 1154  | No | NA | 0 | 0  | Low-quality    | Genome-fragment | NA | 1.86  | 0 |
| S11-final-viral-combined_k141_146837  | [full]   | 1220  | No | NA | 0 | 0  | Not-determined | Genome-fragment | NA | 0     | 0 |
| S11-final-viral-combined_k141_187827  | [full]   | 2027  | No | NA | 0 | 1  | Not-determined | Genome-fragment | NA | 0     | 0 |
| S11-final-viral-combined_k141_324950  | [full]   | 1366  | No | NA | 0 | 0  | Not-determined | Genome-fragment | NA | 0     | 0 |
| S11-final-viral-combined_k141_132150  | [full]   | 1455  | No | NA | 0 | 1  | Not-determined | Genome-fragment | NA | 0     | 0 |
| S17-final-viral-combined_k141_136391  | [full]   | 1154  | No | NA | 1 | 0  | Low-quality    | Genome-fragment | NA | 2.38  | 0 |
| S17-k141_107905                       |          | 1154  | No | NA | 0 | 0  | Low-quality    | Genome-fragment | NA | 2.32  | 0 |
| S11-final-viral-combined_k141_146851  | [full]   | 1422  | No | NA | 0 | 1  | Not-determined | Genome-fragment | NA | 0     | 0 |
| S11-final-viral-combined_k141_197951  | [full]   | 1524  | No | NA | 0 | 1  | Not-determined | Genome-fragment | NA | 0     | 0 |
| S2-final-viral-combined_k141_105177   | [full]   | 1154  | No | NA | 0 | 0  | Low-quality    | Genome-fragment | NA | 2.12  | 0 |
| S11-final-viral-combined_k141_118722  | [full]   | 1937  | No | NA | 0 | 2  | Not-determined | Genome-fragment | NA | 0     | 0 |
| S8_k141_218954                        |          | 1154  | No | NA | 0 | 1  | Low-quality    | Genome-fragment | NA | 3.38  | 0 |
| S11-final-viral-combined_k141_270681  | [full]   | 10387 | No | NA | 0 | 1  | Not-determined | Genome-fragment | NA | 0     | 0 |
| S11-final-viral-combined_k141_187891  | [full]   | 2214  | No | NA | 0 | 0  | Not-determined | Genome-fragment | NA | 0     | 0 |
| S11-final-viral-combined_k141_106222  | [full]   | 2302  | No | NA | 0 | 2  | Not-determined | Genome-fragment | NA | 0     | 0 |
| S11-final-viral-combined_k141_105597  | [full]   | 1155  | No | NA | 0 | 0  | Low-quality    | Genome-fragment | NA | 2.13  | 0 |
| S11-final-viral-combined_k141_160832  | [full]   | 1431  | No | NA | 0 | 1  | Not-determined | Genome-fragment | NA | 0     | 0 |
| S11-final-viral-combined_k141_91798   | [full]   | 1474  | No | NA | 0 | 2  | Not-determined | Genome-fragment | NA | 0     | 0 |
| S11-final-viral-combined_k141_238031  | [full]   | 1903  | No | NA | 0 | 0  | Not-determined | Genome-fragment | NA | 0     | 0 |
| S11-final-viral-combined_k141_146928  | [full]   | 4729  | No | NA | 0 | 1  | Not-determined | Genome-fragment | NA | 0     | 0 |
| S11-final-viral-combined_k141_187926  | [full]   | 2421  | No | NA | 0 | 0  | Not-determined | Genome-fragment | NA | 0     | 0 |
| S11-final-viral-combined_k141_215987  | [full]   | 5326  | No | NA | 0 | 4  | Not-determined | Genome-fragment | NA | 0     | 0 |
| S11-final-viral-combined_k141_311698  | [full]   | 1253  | No | NA | 0 | 2  | Not-determined | Genome-fragment | NA | 0     | 0 |
| S11-final-viral-combined_k141_257559  | [full]   | 3372  | No | NA | 0 | 2  | Not-determined | Genome-fragment | NA | 0     | 0 |
| S11-final-viral-combined_k141_298037  | [full]   | 1335  | No | NA | 0 | 0  | Not-determined | Genome-fragment | NA | 0     | 0 |
| S1-final-viral-combined_k141_102533   | [full]   | 1155  | No | NA | 1 | 0  | Low-quality    | Genome-fragment | NA | 7.15  | 0 |
| S5_k141_213459                        |          | 1155  | No | NA | 0 | 0  | Low-quality    | Genome-fragment | NA | 3.38  | 0 |
| S11-final-viral-combined_k141_187966  | [full]   | 1162  | No | NA | 0 | 1  | Not-determined | Genome-fragment | NA | 0     | 0 |
| S11-final-viral-combined_k141_216061  | [full]   | 2309  | No | NA | 0 | 2  | Not-determined | Genome-fragment | NA | 0     | 0 |
| S11-final-viral-combined_k141_132236  | [full]   | 4274  | No | NA | 0 | 4  | Not-determined | Genome-fragment | NA | 0     | 0 |
| S12-final-viral-combined_k141_324172  | [full]   | 1155  | No | NA | 2 | 0  | Low-quality    | Genome-fragment | NA | 1.97  | 0 |
| S11-final-viral-combined_k141_285099  | [full]   | 5957  | No | NA | 1 | 1  | Not-determined | Genome-fragment | NA | 0.73  | 0 |
| S12_k141_220389                       |          | 1155  | No | NA | 1 | 0  | Low-quality    | Genome-fragment | NA | 0.81  | 0 |
| S12_k141_45481                        |          | 1155  | No | NA | 0 | 0  | Low-quality    | Genome-fragment | NA | 0     | 0 |
| S11-final-viral-combined_k141_325095  | [full]   | 3168  | No | NA | 0 | 1  | Not-determined | Genome-fragment | NA | 0     | 0 |
| S2-final-viral-combined_k141_12618    | [H2gene] | 1155  | No | NA | 0 | 0  | Low-quality    | Genome-fragment | NA | 2.39  | 0 |
| S11-final-viral-combined_k141_187998  | [full]   | 1639  | No | NA | 0 | 0  | Not-determined | Genome-fragment | NA | 0     | 0 |
| S11-final-viral-combined_k141_325131  | [full]   | 1030  | No | NA | 0 | 0  | Not-determined | Genome-fragment | NA | 0     | 0 |
| S11-final-viral-combined_k141_174806  | [full]   | 1418  | No | NA | 0 | 1  | Not-determined | Genome-fragment | NA | 0     | 0 |
| S11-final-viral-combined_k141_216094  | [full]   | 4020  | No | NA | 0 | 5  | Not-determined | Genome-fragment | NA | 0     | 0 |
| S11-final-viral-combined_k141_312775  | [full]   | 2477  | No | NA | 0 | 1  | Not-determined | Genome-fragment | NA | 0     | 0 |
| S6-final-viral-combined_k141_106465   | [H2gene] | 1155  | No | NA | 1 | 0  | Low-quality    | Genome-fragment | NA | 1.89  | 0 |
| S11-final-viral-combined_k141_321685  | [full]   | 1156  | No | NA | 0 | 0  | Low-quality    | Genome-fragment | NA | 1.96  | 0 |
| S11-final-viral-combined_k141_257621  | [full]   | 1611  | No | NA | 0 | 1  | Not-determined | Genome-fragment | NA | 0     | 0 |
| S6-final-viral-combined_k141_156005   | [full]   | 1156  | No | NA | 3 | 0  | Low-quality    | Genome-fragment | NA | 3.54  | 0 |
| S11-final-viral-combined_k141_188033  | [full]   | 1340  | No | NA | 0 | 1  | Not-determined | Genome-fragment | NA | 0     | 0 |
| S11-final-viral-combined_k141_147034  | [full]   | 1570  | No | NA | 0 | 2  | Not-determined | Genome-fragment | NA | 0     | 0 |
| S7-final-viral-combined_k141_142471   | [full]   | 1156  | No | NA | 0 | 0  | Low-quality    | Genome-fragment | NA | 2.49  | 0 |
| S7-final-viral-combined_k141_163145   | [full]   | 1156  | No | NA | 0 | 0  | Low-quality    | Genome-fragment | NA | 2.81  | 0 |
| S11-final-viral-combined_k141_285215  | [full]   | 4845  | No | NA | 0 | 2  | Not-determined | Genome-fragment | NA | 0     | 0 |
| S11-final-viral-combined_k141_64392   | [full]   | 42456 | No | NA | 9 | 3  | High-quality   | High-quality    | NA | 99.12 | 0 |
| S11-final-viral-combined_k141_161051  | [full]   | 4739  | No | NA | 0 | 1  | Not-determined | Genome-fragment | NA | 0     | 0 |
| S7-final-viral-combined_k141_129787   | [H2gene] | 1156  | No | NA | 1 | 0  | Low-quality    | Genome-fragment | NA | 2.73  | 0 |
| S17-final-viral-combined_k141_23886   | [full]   | 1156  | No | NA | 0 | 1  | Low-quality    | Genome-fragment | NA | 1.75  | 0 |
| S11-final-viral-combined_k141_77553   | [full]   | 2160  | No | NA | 0 | 1  | Not-determined | Genome-fragment | NA | 0     | 0 |
| S8-final-viral-combined_k141_86537    | [full]   | 1156  | No | NA | 1 | 0  | Low-quality    | Genome-fragment | NA | 2.62  | 0 |
| S8_k141_23147                         |          | 1156  | No | NA | 0 | 0  | Low-quality    | Genome-fragment | NA | 1.41  | 0 |
| S11-final-viral-combined_k141_312811  | [full]   | 1626  | No | NA | 0 | 0  | Not-determined | Genome-fragment | NA | 0.64  | 0 |
| S9_k141_138315                        |          | 1157  | No | NA | 0 | 2  | Low-quality    | Genome-fragment | NA | 0     | 0 |
| S11-final-viral-combined_k141_244239  | [full]   | 1662  | No | NA | 0 | 1  | Not-determined | Genome-fragment | NA | 0     | 0 |
| S11-final-viral-combined_k141_125399  | [H2gene] | 1157  | No | NA | 0 | 0  | Low-quality    | Genome-fragment | NA | 2.15  | 0 |
| S11-final-viral-combined_k141_9732    | [full]   | 1217  | No | NA | 0 | 2  | Not-determined | Genome-fragment | NA | 0     | 0 |
| S1-final-viral-combined_k141_348384   | [full]   | 1157  | No | NA | 0 | 0  | Low-quality    | Genome-fragment | NA | 2.42  | 0 |
| S11-final-viral-combined_k141_50768   | [full]   | 1810  | No | NA | 0 | 0  | Not-determined | Genome-fragment | NA | 0     | 0 |
| S11-final-viral-combined_k141_64448   | [full]   | 4342  | No | NA | 0 | 3  | Not-determined | Genome-fragment | NA | 0     | 0 |
| S11-final-viral-combined_k141_270847  | [full]   | 1979  | No | NA | 0 | 0  | Not-determined | Genome-fragment | NA | 0     | 0 |
| S11-final-viral-combined_k141_132290  | [full]   | 1537  | No | NA | 0 | 0  | Not-determined | Genome-fragment | NA | 0     | 0 |
| S1-final-viral-combined_k141_184627   | [full]   | 1157  | No | NA | 0 | 1  | Low-quality    | Genome-fragment | NA | 0.68  | 0 |
| S11-final-viral-combined_k141_91595   | [full]   | 1493  | No | NA | 0 | 2  | Not-determined | Genome-fragment | NA | 0     | 0 |
| S11-final-viral-combined_k141_244273  | [full]   | 2926  | No | NA | 0 | 2  | Not-determined | Genome-fragment | NA | 0     | 0 |
| S11-final-viral-combined_k141_216193  | [full]   | 1197  | No | NA | 0 | 2  | Not-determined | Genome-fragment | NA | 0     | 0 |
| S11-final-viral-combined_k141_50800   | [full]   | 9429  | No | NA | 0 | 5  | Not-determined | Genome-fragment | NA | 0     | 0 |
| S1-final-viral-combined_k141_113446   | [full]   | 1157  | No | NA | 1 | 0  | Low-quality    | Genome-fragment | NA | 0.73  | 0 |
| S5-final-viral-combined_k141_6831     | [full]   | 1157  | No | NA | 1 | 0  | Low-quality    | Genome-fragment | NA | 2.47  | 0 |
| S5-final-viral-combined_k141_109528   | [H2gene] | 1157  | No | NA | 2 | 0  | Low-quality    | Genome-fragment | NA | 3.11  | 0 |
| S5_k141_109051                        |          | 1157  | No | NA | 0 | 0  | Low-quality    | Genome-fragment | NA | 0.48  | 0 |
| S11-final-viral-combined_k141_106428  | [full]   | 8622  | No | NA | 0 | 5  | Not-determined | Genome-fragment | NA | 0     | 0 |
| S11-final-viral-combined_k141_9778    | [full]   | 1495  | No | NA | 0 | 3  | Not-determined | Genome-fragment | NA | 0     | 0 |
| S11-final-viral-combined_k141_229891  | [full]   | 1457  | No | NA | 0 | 0  | Not-determined | Genome-fragment | NA | 0     | 0 |
| S12-final-viral-combined_k141_77285   | [full]   | 1157  | No | NA | 0 | 0  | Low-quality    | Genome-fragment | NA | 0.75  | 0 |
| S11-final-viral-combined_k141_298241  | [full]   | 1233  | No | NA | 0 | 1  | Not-determined | Genome-fragment | NA | 0     | 0 |
| S11-final-viral-combined_k141_32527   | [full]   | 1584  | No | NA | 0 | 3  | Not-determined | Genome-fragment | NA | 0     | 0 |
| S11-final-viral-combined_k141_92019   | [full]   | 4681  | No | NA | 0 | 3  | Not-determined | Genome-fragment | NA | 0     | 0 |
| S11-final-viral-combined_k141_174976  | [full]   | 1004  | No | NA | 0 | 1  | Not-determined | Genome-fragment | NA | 0     | 0 |
| S11-final-viral-combined_k141_50841   | [full]   | 3452  | No | NA | 0 | 3  | Not-determined | Genome-fragment | NA | 0     | 0 |
| S11-final-viral-combined_k141_16111   | [full]   | 4925  | No | NA | 0 | 2  | Not-determined | Genome-fragment | NA | 0     | 0 |
| S11-final-viral-combined_k141_77639   | [full]   | 1039  | No | NA | 0 | 1  | Not-determined | Genome-fragment | NA | 0     | 0 |
| S11-final-viral-combined_k141_106448  | [full]   | 1676  | No | NA | 0 | 2  | Not-determined | Genome-fragment | NA | 0     | 0 |
| S11-final-viral-combined_k141_132383  | [full]   | 2414  | No | NA | 0 | 2  | Not-determined | Genome-fragment | NA | 0     | 0 |
| S11-final-viral-combined_k141_77680   | [full]   | 1123  | No | NA | 0 | 2  | Not-determined | Genome-fragment | NA | 0     | 0 |
| S11-final-viral-combined_k141_64569   | [full]   | 3171  | No | NA | 0 | 0  | Not-determined | Genome-fragment | NA | 0     | 0 |
| S2_k141_180733                        |          | 1157  | No | NA | 2 | 0  | Low-quality    | Genome-fragment | NA | 3.03  | 0 |
| S8-final-viral-combined_k141_185608   | [full]   | 1157  | No | NA | 0 | 0  | Low-quality    | Genome-fragment | NA | 3.49  | 0 |
| S11-final-viral-combined_k141_17717   | [full]   | 3687  | No | NA | 0 | 2  | Not-determined | Genome-fragment | NA | 0     | 0 |
| S11-final-viral-combined_k141_77720   | [full]   | 1963  | No | NA | 0 | 2  | Not-determined | Genome-fragment | NA | 0     | 0 |
| S11-final-viral-combined_k141_257839  | [full]   | 1393  | No | NA | 0 | 1  | Not-determined | Genome-fragment | NA | 0     | 0 |
| S11-final-viral-combined_k141_244352  | [full]   | 2472  | No | NA | 0 | 1  | Not-determined | Genome-fragment | NA | 0.75  | 0 |
| S5_k141_74                            |          | 1158  | No | NA | 0 | 1  | Low-quality    | Genome-fragment | NA | 0     | 0 |
| S11-final-viral-combined_k141_92058   | [full]   | 1062  | No | NA | 0 | 1  | Not-determined | Genome-fragment | NA | 0     | 0 |
| S7-final-viral-combined_k141_202583   | [H2gene] | 1158  | No | NA | 1 | 0  | Low-quality    | Genome-fragment | NA | 2.64  | 0 |
| S11-final-viral-combined_k141_37075   | [full]   | 1347  | No | NA | 0 | 1  | Not-determined | Genome-fragment | NA | 0     | 0 |
| S11-final-viral-combined_k141_21950   | [full]   | 4422  | No | NA | 0 | 6  | Not-determined | Genome-fragment | NA | 0     | 0 |
| S7-final-viral-combined_k141_22030    | [full]   | 1158  | No | NA | 0 | 0  | Low-quality    | Genome-fragment | NA | 2.58  | 0 |
| S11-final-viral-combined_k141_325295  | [full]   | 2238  | No | NA | 0 | 2  | Not-determined | Genome-fragment | NA | 0     | 0 |
| S11-final-viral-combined_k141_298381  | [full]   | 1573  | No | NA | 0 | 0  | Not-determined | Genome-fragment | NA | 0     | 0 |
| S11-final-viral-combined_k141_298635  | [full]   | 1158  | No | NA | 4 | 0  | Low-quality    | Genome-fragment | NA | 3.35  | 0 |
| S11-final-viral-combined_k141_147287  | [full]   | 1219  | No | NA | 0 | 0  | Not-determined | Genome-fragment | NA | 0     | 0 |
| S11-final-viral-combined_k141_202201  | [full]   | 1257  | No | NA | 0 | 2  | Not-determined | Genome-fragment | NA | 0     | 0 |
| S12_k141_154407                       |          | 1158  | No | NA | 0 | 0  | Low-quality    | Genome-fragment | NA | 1.89  |   |



|                                      |         |       |    |    |   |    |                |                 |       |   |
|--------------------------------------|---------|-------|----|----|---|----|----------------|-----------------|-------|---|
| S12-final-viral-combined_k141_239852 | [H2gene | 1159  | No | NA | 1 | 0  | Low-quality    | Genome-fragment | 2.39  | 0 |
| S11-final-viral-combined_k141_271081 | [full]  | 2928  | No | NA | 0 | 1  | Not-determined | Genome-fragment | NA    | 0 |
| S11-final-viral-combined_k141_512341 | [full]  | 1728  | No | NA | 0 | 2  | Not-determined | Genome-fragment | NA    | 0 |
| S11-final-viral-combined_k141_271088 | [full]  | 1958  | No | NA | 0 | 0  | Not-determined | Genome-fragment | NA    | 0 |
| S11-final-viral-combined_k141_92382  | [full]  | 2399  | No | NA | 0 | 1  | Not-determined | Genome-fragment | NA    | 0 |
| S11-final-viral-combined_k141_202396 | [full]  | 1371  | No | NA | 0 | 1  | Not-determined | Genome-fragment | NA    | 0 |
| S2_k141_47323                        |         | 1159  | No | NA | 0 | 1  | Low-quality    | Genome-fragment | 0.55  | 0 |
| S8-final-viral-combined_k141_15694   | [full]  | 1159  | No | NA | 0 | 0  | Low-quality    | Genome-fragment | 0.194 | 0 |
| S11-final-viral-combined_k141_202401 | [full]  | 2760  | No | NA | 0 | 2  | Not-determined | Genome-fragment | NA    | 0 |
| S9_k141_63565                        |         | 1160  | No | NA | 0 | 0  | Low-quality    | Genome-fragment | 2.87  | 0 |
| S11-final-viral-combined_k141_271097 | [full]  | 1154  | No | NA | 0 | 1  | Not-determined | Genome-fragment | NA    | 0 |
| S11-final-viral-combined_k141_92380  | [full]  | 1669  | No | NA | 0 | 2  | Not-determined | Genome-fragment | NA    | 0 |
| S11-final-viral-combined_k141_204555 | [full]  | 1160  | No | NA | 0 | 0  | Low-quality    | Genome-fragment | 2.78  | 0 |
| S11-final-viral-combined_k141_64820  | [full]  | 1679  | No | NA | 0 | 3  | Not-determined | Genome-fragment | NA    | 0 |
| S11-final-viral-combined_k141_313267 | [full]  | 1000  | No | NA | 0 | 0  | Not-determined | Genome-fragment | NA    | 0 |
| S11-final-viral-combined_k141_291021 | [H2gene | 1160  | No | NA | 1 | 0  | Low-quality    | Genome-fragment | 1.52  | 0 |
| S11-final-viral-combined_k141_51270  | [full]  | 3471  | No | NA | 0 | 1  | Not-determined | Genome-fragment | NA    | 0 |
| S11-final-viral-combined_k141_64832  | [full]  | 1886  | No | NA | 0 | 2  | Not-determined | Genome-fragment | NA    | 0 |
| S11-final-viral-combined_k141_285051 | [full]  | 2006  | No | NA | 0 | 1  | Not-determined | Genome-fragment | NA    | 0 |
| S11-final-viral-combined_k141_77906  | [full]  | 2251  | No | NA | 0 | 2  | Not-determined | Genome-fragment | NA    | 0 |
| S11-final-viral-combined_k141_64878  | [full]  | 4049  | No | NA | 0 | 5  | Not-determined | Genome-fragment | NA    | 0 |
| S1-final-viral-combined_k141_32380   | [H2gene | 1160  | No | NA | 1 | 0  | Low-quality    | Genome-fragment | 3.07  | 0 |
| S1_k141_21359                        |         | 1160  | No | NA | 0 | 2  | Low-quality    | Genome-fragment | 0.88  | 0 |
| S3-final-viral-combined_k141_30952   | [H2gene | 1160  | No | NA | 1 | 0  | Low-quality    | Genome-fragment | 3     | 0 |
| S11-final-viral-combined_k141_161396 | [full]  | 2317  | No | NA | 0 | 1  | Not-determined | Genome-fragment | NA    | 0 |
| S11-final-viral-combined_k141_258190 | [full]  | 7507  | No | NA | 0 | 6  | Not-determined | Genome-fragment | NA    | 0 |
| S5_k141_190372                       |         | 1160  | No | NA | 0 | 1  | Low-quality    | Genome-fragment | 1.03  | 0 |
| S11-final-viral-combined_k141_147637 | [full]  | 4936  | No | NA | 0 | 2  | Not-determined | Genome-fragment | NA    | 0 |
| S11-final-viral-combined_k141_321746 | [full]  | 3398  | No | NA | 0 | 2  | Not-determined | Genome-fragment | NA    | 0 |
| S17-final-viral-combined_k141_233749 | [H2gene | 1160  | No | NA | 1 | 0  | Low-quality    | Genome-fragment | 2.86  | 0 |
| S11-final-viral-combined_k141_147642 | [full]  | 1426  | No | NA | 0 | 0  | Not-determined | Genome-fragment | NA    | 0 |
| S12-final-viral-combined_k141_38042  | [full]  | 1160  | No | NA | 0 | 0  | Low-quality    | Genome-fragment | 1.75  | 0 |
| S8-final-viral-combined_k141_52757   | [full]  | 1160  | No | NA | 0 | 0  | Low-quality    | Genome-fragment | 5.46  | 0 |
| S11-final-viral-combined_k141_161427 | [full]  | 8073  | No | NA | 0 | 3  | Not-determined | Genome-fragment | NA    | 0 |
| S8-final-viral-combined_k141_78346   | [full]  | 1160  | No | NA | 1 | 0  | Low-quality    | Genome-fragment | 2.14  | 0 |
| S9_k141_9380                         |         | 1161  | No | NA | 0 | 2  | Low-quality    | Genome-fragment | 2.43  | 0 |
| S11_k141_311053                      |         | 1161  | No | NA | 2 | 0  | Low-quality    | Genome-fragment | 2.47  | 0 |
| S11_k141_113361                      |         | 1161  | No | NA | 0 | 0  | Low-quality    | Genome-fragment | 2.95  | 0 |
| S11-final-viral-combined_k141_132765 | [full]  | 1155  | No | NA | 1 | 1  | Not-determined | Genome-fragment | NA    | 0 |
| S11-final-viral-combined_k141_64962  | [full]  | 2617  | No | NA | 0 | 3  | Not-determined | Genome-fragment | NA    | 0 |
| S1-final-viral-combined_k141_24380   | [full]  | 1161  | No | NA | 0 | 1  | Low-quality    | Genome-fragment | 2.73  | 0 |
| S11-final-viral-combined_k141_298761 | [full]  | 7041  | No | NA | 4 | 4  | Not-determined | Genome-fragment | NA    | 0 |
| S11-final-viral-combined_k141_175474 | [full]  | 2364  | No | NA | 0 | 2  | Not-determined | Genome-fragment | NA    | 0 |
| S11-final-viral-combined_k141_258291 | [full]  | 1361  | No | NA | 0 | 0  | Not-determined | Genome-fragment | NA    | 0 |
| S11-final-viral-combined_k141_106846 | [full]  | 2976  | No | NA | 0 | 2  | Not-determined | Genome-fragment | NA    | 0 |
| S1_k141_291706                       |         | 1161  | No | NA | 0 | 1  | Low-quality    | Genome-fragment | 1.39  | 0 |
| S5-final-viral-combined_k141_2297    | [full]  | 1161  | No | NA | 0 | 0  | Low-quality    | Genome-fragment | 0.65  | 0 |
| S7-final-viral-combined_k141_50240   | [full]  | 1161  | No | NA | 0 | 0  | Low-quality    | Genome-fragment | 1.79  | 0 |
| S11-final-viral-combined_k141_78056  | [full]  | 4060  | No | NA | 0 | 1  | Not-determined | Genome-fragment | NA    | 0 |
| S11-final-viral-combined_k141_64994  | [full]  | 2752  | No | NA | 0 | 2  | Not-determined | Genome-fragment | NA    | 0 |
| S11-final-viral-combined_k141_161520 | [full]  | 4379  | No | NA | 0 | 3  | Not-determined | Genome-fragment | NA    | 0 |
| S11-final-viral-combined_k141_202544 | [full]  | 2510  | No | NA | 0 | 2  | Not-determined | Genome-fragment | NA    | 0 |
| S11-final-viral-combined_k141_65004  | [full]  | 6394  | No | NA | 0 | 4  | Not-determined | Genome-fragment | NA    | 0 |
| S7-final-viral-combined_k141_160921  | [H2gene | 1161  | No | NA | 1 | 0  | Low-quality    | Genome-fragment | 1.7   | 0 |
| S11-final-viral-combined_k141_132826 | [full]  | 1711  | No | NA | 0 | 2  | Not-determined | Genome-fragment | NA    | 0 |
| S17-final-viral-combined_k141_70231  | [full]  | 1161  | No | NA | 0 | 1  | Low-quality    | Genome-fragment | 2.52  | 0 |
| S11-final-viral-combined_k141_178101 | [full]  | 1491  | No | NA | 0 | 2  | Not-determined | Genome-fragment | NA    | 0 |
| S11-final-viral-combined_k141_22350  | [full]  | 1184  | No | NA | 0 | 0  | Not-determined | Genome-fragment | NA    | 0 |
| S11-final-viral-combined_k141_158495 | [full]  | 1748  | No | NA | 0 | 1  | Not-determined | Genome-fragment | NA    | 0 |
| S11-final-viral-combined_k141_298795 | [full]  | 1504  | No | NA | 0 | 2  | Not-determined | Genome-fragment | NA    | 0 |
| S17-final-viral-combined_k141_73393  | [full]  | 1161  | No | NA | 1 | 0  | Low-quality    | Genome-fragment | 2.42  | 0 |
| S11-final-viral-combined_k141_123854 | [full]  | 1045  | No | NA | 0 | 1  | Not-determined | Genome-fragment | NA    | 0 |
| S11-final-viral-combined_k141_216811 | [full]  | 2117  | No | NA | 0 | 3  | Not-determined | Genome-fragment | NA    | 0 |
| S11-final-viral-combined_k141_37534  | [full]  | 5111  | No | NA | 0 | 1  | Not-determined | Genome-fragment | NA    | 0 |
| S12-final-viral-combined_k141_265191 | [full]  | 1161  | No | NA | 0 | 0  | Low-quality    | Genome-fragment | 2.49  | 0 |
| S11-final-viral-combined_k141_37546  | [full]  | 1492  | No | NA | 0 | 1  | Not-determined | Genome-fragment | NA    | 0 |
| S11-final-viral-combined_k141_313437 | [full]  | 1116  | No | NA | 0 | 2  | Not-determined | Genome-fragment | NA    | 0 |
| S12-final-viral-combined_k141_13631  | [H2gene | 1161  | No | NA | 1 | 0  | Low-quality    | Genome-fragment | 2.61  | 0 |
| S2-final-viral-combined_k141_229816  | [full]  | 1161  | No | NA | 0 | 0  | Low-quality    | Genome-fragment | 0.64  | 0 |
| S2-final-viral-combined_k141_189099  | [full]  | 1161  | No | NA | 0 | 1  | Low-quality    | Genome-fragment | 0.71  | 0 |
| S11-final-viral-combined_k141_132895 | [full]  | 10610 | No | NA | 0 | 7  | Not-determined | Genome-fragment | NA    | 0 |
| S8-final-viral-combined_k141_109685  | [full]  | 1161  | No | NA | 0 | 0  | Low-quality    | Genome-fragment | 2.8   | 0 |
| S8_k141_258310                       |         | 1161  | No | NA | 0 | 0  | Low-quality    | Genome-fragment | 2.63  | 0 |
| S9-final-viral-combined_k141_56932   | [full]  | 1162  | No | NA | 0 | 0  | Low-quality    | Genome-fragment | 0.81  | 0 |
| S3-final-viral-combined_k141_172787  | [full]  | 1162  | No | NA | 0 | 1  | Low-quality    | Genome-fragment | 0.42  | 0 |
| S5-final-viral-combined_k141_65518   | [full]  | 1162  | No | NA | 0 | 0  | Low-quality    | Genome-fragment | 1.93  | 0 |
| S11-final-viral-combined_k141_78177  | [full]  | 10409 | No | NA | 0 | 5  | Not-determined | Genome-fragment | NA    | 0 |
| S11-final-viral-combined_k141_92581  | [full]  | 1269  | No | NA | 0 | 1  | Not-determined | Genome-fragment | NA    | 0 |
| S11-final-viral-combined_k141_22448  | [full]  | 1406  | No | NA | 0 | 2  | Not-determined | Genome-fragment | NA    | 0 |
| S11-final-viral-combined_k141_244878 | [full]  | 1148  | No | NA | 0 | 1  | Not-determined | Genome-fragment | NA    | 0 |
| S11-final-viral-combined_k141_325689 | [full]  | 1791  | No | NA | 0 | 1  | Not-determined | Genome-fragment | NA    | 0 |
| S17-final-viral-combined_k141_64571  | [full]  | 1162  | No | NA | 0 | 1  | Low-quality    | Genome-fragment | 0.93  | 0 |
| S11-final-viral-combined_k141_244885 | [full]  | 2818  | No | NA | 0 | 2  | Not-determined | Genome-fragment | NA    | 0 |
| S11-final-viral-combined_k141_78203  | [full]  | 12085 | No | NA | 0 | 10 | Not-determined | Genome-fragment | NA    | 0 |
| S12-final-viral-combined_k141_82658  | [full]  | 1162  | No | NA | 0 | 1  | Low-quality    | Genome-fragment | 0.54  | 0 |
| S11-final-viral-combined_k141_92612  | [full]  | 2229  | No | NA | 0 | 0  | Not-determined | Genome-fragment | NA    | 0 |
| S11-final-viral-combined_k141_106993 | [full]  | 3344  | No | NA | 0 | 0  | Not-determined | Genome-fragment | NA    | 0 |
| S2_k141_192361                       |         | 1162  | No | NA | 0 | 0  | Low-quality    | Genome-fragment | 2.12  | 0 |
| S11-final-viral-combined_k141_271415 | [full]  | 1428  | No | NA | 0 | 2  | Not-determined | Genome-fragment | NA    | 0 |
| S4_k141_107021                       |         | 1162  | No | NA | 0 | 1  | Low-quality    | Genome-fragment | 1.71  | 0 |
| S11-final-viral-combined_k141_298862 | [full]  | 2146  | No | NA | 0 | 1  | Not-determined | Genome-fragment | NA    | 0 |
| S11-final-viral-combined_k141_313520 | [full]  | 1463  | No | NA | 0 | 2  | Not-determined | Genome-fragment | NA    | 0 |
| S11-final-viral-combined_k141_188652 | [full]  | 1744  | No | NA | 0 | 1  | Not-determined | Genome-fragment | NA    | 0 |
| S11-final-viral-combined_k141_10225  | [full]  | 2503  | No | NA | 0 | 0  | Not-determined | Genome-fragment | NA    | 0 |
| S8-final-viral-combined_k141_55024   | [full]  | 1162  | No | NA | 0 | 0  | Low-quality    | Genome-fragment | 0.74  | 0 |
| S8_k141_85761                        |         | 1162  | No | NA | 0 | 0  | Low-quality    | Genome-fragment | 1.56  | 0 |
| S1-final-viral-combined_k141_104591  | [H2gene | 1163  | No | NA | 0 | 1  | Low-quality    | Genome-fragment | 6.93  | 0 |
| S5-final-viral-combined_k141_17517   | [full]  | 1163  | No | NA | 2 | 0  | Low-quality    | Genome-fragment | 2.39  | 0 |
| S5_k141_33909                        |         | 1163  | No | NA | 0 | 0  | Low-quality    | Genome-fragment | 0.47  | 0 |
| S7-final-viral-combined_k141_72393   | [full]  | 1163  | No | NA | 1 | 0  | Low-quality    | Genome-fragment | 3.09  | 0 |
| S11-final-viral-combined_k141_202748 | [full]  | 2379  | No | NA | 0 | 1  | Not-determined | Genome-fragment | NA    | 0 |
| S12-final-viral-combined_k141_309396 | [full]  | 1163  | No | NA | 0 | 0  | Low-quality    | Genome-fragment | 2.48  | 0 |
| S6-final-viral-combined_k141_132470  | [full]  | 1163  | No | NA | 0 | 1  | Low-quality    | Genome-fragment | 0.54  | 0 |
| S11-final-viral-combined_k141_313553 | [full]  | 4095  | No | NA | 0 | 3  | Not-determined | Genome-fragment | NA    | 0 |
| S11-final-viral-combined_k141_216898 | [full]  | 1209  | No | NA | 0 | 0  | Not-determined | Genome-fragment | NA    | 0 |
| S6_k141_19090                        |         | 1163  | No | NA | 1 | 0  | Low-quality    | Genome-fragment | 3.56  | 0 |
| S11-final-viral-combined_k141_161719 | [full]  | 2818  | No | NA | 0 | 2  | Not-determined | Genome-fragment | NA    | 0 |
| S6_k141_21461                        |         | 1163  | No | NA | 0 | 0  | Low-quality    | Genome-fragment | 3.86  | 0 |
| S9-final-viral-combined_k141_57841   | [full]  | 1164  | No | NA | 0 | 0  | Low-quality    | Genome-fragment | 2.08  | 0 |
| S11-final-viral-combined_k141_170146 | [full]  | 1164  | No | NA | 0 | 0  | Low-quality    | Genome-fragment | 1.78  | 0 |
| S1-final-viral-combined_k141_102501  | [full]  | 1164  | No | NA | 0 | 1  | Low-quality    | Genome-fragment | 1.42  | 0 |
| S11-final-viral-combined_k141_202796 | [full]  | 2395  | No | NA | 0 | 1  | Not-determined | Genome-fragment | NA    | 0 |
| S11-final-viral-combined_k141_27965  | [full]  | 1164  | No | NA | 0 | 0  | Low-quality    | Genome-fragment | 0.8   | 0 |
| S11-final-viral-combined_k141_107078 | [full]  | 3355  | No | NA | 0 | 1  | Not-determined | Genome-fragment | NA    | 0 |
| S11-final-viral-combined_k141_147914 | [full]  | 4238  | No | NA | 0 | 2  | Not-determined | Genome-fragment | NA    | 0 |
| S11-final-viral-combined_k141_65264  | [full]  | 2830  | No | NA | 0 | 1  | Not-determined | Genome-fragment | NA    | 0 |
| S1_k141_292778                       |         | 1164  | No | NA | 0 | 0  | Low-quality    | Genome-fragment | 2.43  | 0 |
| S11-final-viral-combined_k141_236669 | [full]  | 2712  | No | NA | 0 | 2  | Not-determined | Genome-fragment | NA    | 0 |
| S5-final-viral-combined_k141_58641   | [H2gene | 1164  | No | NA | 1 | 0  | Low-quality    | Genome-fragment | 2.61  | 0 |
| S5_k141_110042                       |         | 1164  | No | NA | 0 | 1  | Low-quality    | Genome-fragment | 0.74  | 0 |
| S6-final-viral-combined_k141_60055   | [full]  | 1164  | No | NA | 2 | 0  | Low-quality    | Genome-fragment | 1.95  | 0 |
| S11-final-viral-combined_k141_32830  | [full]  | 1165  | No | NA | 0 | 0  | Low-quality    | Genome-fragment | 3.39  | 0 |
| S11-final-viral-combined_k141_78354  | [full]  | 2297  | No | NA | 0 | 2  | Not-determined | Genome-fragment | NA    | 0 |
| S11-final-viral-combined_k141_258156 | [H2gene | 1165  | No | NA | 1 | 0  | Low-quality    | Genome-fragment | 2.53  | 0 |
| S11-final-viral-combined_k141_313687 | [full]  | 2866  | No | NA | 0 | 0  | Not-determined | Genome-fragment | NA    | 0 |
| S11-final-viral-combined_k141_162643 | [full]  | 1165  | No | NA | 0 | 0  | Low-quality    | Genome-fragment | 2.49  | 0 |
| S11-final-viral-combined_k141_51768  | [full]  | 7033  | No | NA | 0 | 3  | Not-determined | Genome-fragment | NA    | 0 |
| S11-final-viral-combined_k141_325824 | [full]  | 3108  | No | NA | 0 | 2  | Not-determined | Genome-fragment | NA    | 0 |
| S11-final-viral-combined_k141_78380  | [full]  | 1014  | No | NA | 0 | 0  | Not-determined | Genome-fragment | NA    | 0 |
| S11-final-viral-combined_k141_202859 | [full]  | 2400  | No | NA | 0 | 0  | Not-determined |                 |       |   |



|                                      |          |       |     |     |    |   |                |                 |    |      |       |
|--------------------------------------|----------|-------|-----|-----|----|---|----------------|-----------------|----|------|-------|
| S11-final-viral-combined_k141_188983 | [full]   | 1518  | No  | NA  | 0  | 0 | Not-determined | Genome-fragment | NA | 0    | 0     |
| S12-final-viral-combined_k141_20246  | [full]   | 1167  | No  | NA  | 0  | 2 | Low-quality    | Genome-fragment | NA | 0.68 | 0     |
| S11-final-viral-combined_k141_313814 | [full]   | 1343  | No  | NA  | 0  | 0 | Not-determined | Genome-fragment | NA | 0    | 0     |
| S12-final-viral-combined_k141_343602 | [full]   | 1167  | No  | NA  | 1  | 0 | Low-quality    | Genome-fragment | NA | 1.53 | 0     |
| S11-final-viral-combined_k141_92934  | [full]   | 1815  | No  | NA  | 0  | 0 | Not-determined | Genome-fragment | NA | 0    | 0     |
| S11-final-viral-combined_k141_299251 | [full]   | 1297  | No  | NA  | 0  | 2 | Not-determined | Genome-fragment | NA | 0    | 0     |
| S12-final-viral-combined_k141_345117 | [full]   | 1167  | No  | NA  | 0  | 2 | Low-quality    | Genome-fragment | NA | 0.06 | 0     |
| S8-final-viral-combined_k141_2101    | [full]   | 1167  | No  | NA  | 0  | 0 | Low-quality    | Genome-fragment | NA | 2.45 | 0     |
| S9-final-viral-combined_k141_335546  | [H2gene] | 1168  | No  | NA  | 1  | 0 | Low-quality    | Genome-fragment | NA | 0.75 | 0     |
| S11-final-viral-combined_k141_319394 | [full]   | 1168  | No  | NA  | 1  | 0 | Low-quality    | Genome-fragment | NA | 2.57 | 0     |
| S11-final-viral-combined_k141_299292 | [full]   | 1978  | No  | NA  | 0  | 1 | Not-determined | Genome-fragment | NA | 0    | 0     |
| S11-final-viral-combined_k141_119041 | [full]   | 3653  | No  | NA  | 0  | 2 | Not-determined | Genome-fragment | NA | 0    | 0     |
| S11-final-viral-combined_k141_258785 | [full]   | 2268  | No  | NA  | 0  | 1 | Not-determined | Genome-fragment | NA | 0    | 0     |
| S11-final-viral-combined_k141_90103  | [full]   | 1168  | No  | NA  | 0  | 0 | Low-quality    | Genome-fragment | NA | 2.01 | 0     |
| S11-final-viral-combined_k141_280138 | [full]   | 2337  | No  | NA  | 0  | 1 | Not-determined | Genome-fragment | NA | 0    | 0     |
| S11-final-viral-combined_k141_295041 | [full]   | 2123  | No  | NA  | 0  | 0 | Not-determined | Genome-fragment | NA | 0    | 0     |
| S1-final-viral-combined_k141_111992  | [full]   | 1168  | No  | NA  | 0  | 1 | Low-quality    | Genome-fragment | NA | 0.71 | 0     |
| S1_k141_376664                       |          | 1168  | No  | NA  | 1  | 0 | Low-quality    | Genome-fragment | NA | 0.59 | 0     |
| S5-final-viral-combined_k141_206022  | [full]   | 1168  | No  | NA  | 1  | 0 | Low-quality    | Genome-fragment | NA | 2.45 | 0     |
| S5-final-viral-combined_k141_7867    | [full]   | 1168  | No  | NA  | 1  | 0 | Low-quality    | Genome-fragment | NA | 2.45 | 0     |
| S11-final-viral-combined_k141_22874  | [full]   | 4029  | No  | NA  | 0  | 2 | Not-determined | Genome-fragment | NA | 1.59 | 0     |
| S5-final-viral-combined_k141_248601  | [full]   | 1168  | No  | NA  | 0  | 1 | Low-quality    | Genome-fragment | NA | 2.77 | 0     |
| S5-final-viral-combined_k141_137060  | [H2gene] | 1168  | No  | NA  | 2  | 0 | Low-quality    | Genome-fragment | NA | 1.59 | 34.16 |
| S17-final-viral-combined_k141_78491  | [full]   | 1168  | Yes | 769 | 2  | 1 | Low-quality    | Genome-fragment | NA | 2.83 | 0     |
| S17-final-viral-combined_k141_51250  | [full]   | 1168  | No  | NA  | 1  | 0 | Low-quality    | Genome-fragment | NA | 0    | 0     |
| S11-final-viral-combined_k141_27172  | [full]   | 4643  | No  | NA  | 0  | 4 | Not-determined | Genome-fragment | NA | 0    | 0     |
| S11-final-viral-combined_k141_22908  | [full]   | 1571  | No  | NA  | 0  | 2 | Not-determined | Genome-fragment | NA | 0    | 0     |
| S11-final-viral-combined_k141_78633  | [full]   | 2775  | No  | NA  | 0  | 3 | Not-determined | Genome-fragment | NA | 0    | 0     |
| S11-final-viral-combined_k141_258844 | [full]   | 5543  | No  | NA  | 0  | 0 | Not-determined | Genome-fragment | NA | 0    | 0     |
| S11-final-viral-combined_k141_107400 | [full]   | 3653  | No  | NA  | 0  | 2 | Not-determined | Genome-fragment | NA | 0    | 0     |
| S11-final-viral-combined_k141_245309 | [full]   | 2514  | No  | NA  | 0  | 2 | Not-determined | Genome-fragment | NA | 0    | 0     |
| S11-final-viral-combined_k141_148501 | [full]   | 6996  | No  | NA  | 0  | 3 | Not-determined | Genome-fragment | NA | 0    | 0     |
| S11-final-viral-combined_k141_120030 | [full]   | 2932  | No  | NA  | 0  | 0 | Not-determined | Genome-fragment | NA | 0    | 0     |
| S11-final-viral-combined_k141_38161  | [full]   | 3140  | No  | NA  | 0  | 2 | Not-determined | Genome-fragment | NA | 0    | 0     |
| S11-final-viral-combined_k141_286234 | [full]   | 5886  | No  | NA  | 0  | 4 | Not-determined | Genome-fragment | NA | 0    | 0     |
| S11-final-viral-combined_k141_107461 | [full]   | 2848  | No  | NA  | 0  | 4 | Not-determined | Genome-fragment | NA | 0    | 0     |
| S11-final-viral-combined_k141_52134  | [full]   | 2643  | No  | NA  | 0  | 0 | Not-determined | Genome-fragment | NA | 0    | 0     |
| S11-final-viral-combined_k141_10605  | [full]   | 1344  | No  | NA  | 0  | 1 | Not-determined | Genome-fragment | NA | 0    | 0     |
| S17-k141_222528                      |          | 1168  | No  | NA  | 0  | 0 | Low-quality    | Genome-fragment | NA | 0.72 | 0     |
| S12-final-viral-combined_k141_331766 | [full]   | 1168  | No  | NA  | 0  | 1 | Low-quality    | Genome-fragment | NA | 0.37 | 0     |
| S11-final-viral-combined_k141_22952  | [full]   | 1505  | No  | NA  | 0  | 1 | Not-determined | Genome-fragment | NA | 2.54 | 0     |
| S12-final-viral-combined_k141_402080 | [full]   | 1168  | No  | NA  | 0  | 0 | Low-quality    | Genome-fragment | NA | 0    | 0     |
| S11-final-viral-combined_k141_133385 | [full]   | 1385  | No  | NA  | 0  | 1 | Not-determined | Genome-fragment | NA | 0    | 0     |
| S11-final-viral-combined_k141_231071 | [full]   | 1529  | No  | NA  | 0  | 0 | Not-determined | Genome-fragment | NA | 0    | 0     |
| S11-final-viral-combined_k141_52162  | [full]   | 1155  | No  | NA  | 0  | 1 | Not-determined | Genome-fragment | NA | 0    | 0     |
| S11-final-viral-combined_k141_133410 | [full]   | 3031  | No  | NA  | 0  | 1 | Not-determined | Genome-fragment | NA | 0    | 0     |
| S11-final-viral-combined_k141_382124 | [full]   | 2374  | No  | NA  | 0  | 3 | Not-determined | Genome-fragment | NA | 0    | 0     |
| S2_k141_148285                       |          | 1168  | No  | NA  | 0  | 0 | Low-quality    | Genome-fragment | NA | 2.73 | 0     |
| S11-final-viral-combined_k141_217300 | [full]   | 2111  | No  | NA  | 0  | 2 | Not-determined | Genome-fragment | NA | 0    | 0     |
| S11-final-viral-combined_k141_52209  | [full]   | 2261  | No  | NA  | 0  | 2 | Not-determined | Genome-fragment | NA | 0    | 0     |
| S4_k141_166750                       |          | 1168  | No  | NA  | 2  | 0 | Low-quality    | Genome-fragment | NA | 0.67 | 0     |
| S11-final-viral-combined_k141_258961 | [full]   | 1665  | No  | NA  | 0  | 0 | Not-determined | Genome-fragment | NA | 0    | 0     |
| S11-final-viral-combined_k141_23003  | [full]   | 2179  | No  | NA  | 0  | 1 | Not-determined | Genome-fragment | NA | 0    | 0     |
| S8-final-viral-combined_k141_184719  | [H2gene] | 1168  | No  | NA  | 1  | 0 | Low-quality    | Genome-fragment | NA | 2.14 | 0     |
| S11-final-viral-combined_k141_299519 | [full]   | 2423  | No  | NA  | 0  | 2 | Not-determined | Genome-fragment | NA | 0    | 0     |
| S11-final-viral-combined_k141_258988 | [full]   | 2696  | No  | NA  | 0  | 2 | Not-determined | Genome-fragment | NA | 0    | 0     |
| S11-final-viral-combined_k141_52256  | [full]   | 1178  | No  | NA  | 0  | 0 | Not-determined | Genome-fragment | NA | 0    | 0     |
| S11-final-viral-combined_k141_52257  | [full]   | 4068  | No  | NA  | 0  | 2 | Not-determined | Genome-fragment | NA | 0    | 0     |
| S11-final-viral-combined_k141_65801  | [full]   | 1210  | No  | NA  | 0  | 0 | Not-determined | Genome-fragment | NA | 0    | 0     |
| S8-final-viral-combined_k141_241257  | [H2gene] | 1168  | No  | NA  | 1  | 0 | Low-quality    | Genome-fragment | NA | 1.1  | 0     |
| S11-final-viral-combined_k141_23019  | [full]   | 1345  | No  | NA  | 0  | 0 | Not-determined | Genome-fragment | NA | 0    | 0     |
| S11-final-viral-combined_k141_93196  | [full]   | 1640  | No  | NA  | 0  | 1 | Not-determined | Genome-fragment | NA | 2.79 | 0     |
| S9-final-viral-combined_k141_104791  | [full]   | 1169  | No  | NA  | 1  | 0 | Low-quality    | Genome-fragment | NA | 0    | 0     |
| S11-final-viral-combined_k141_65829  | [full]   | 10638 | No  | NA  | 0  | 8 | Not-determined | Genome-fragment | NA | 0    | 0     |
| S11-final-viral-combined_k141_246154 | [full]   | 2250  | No  | NA  | 0  | 2 | Not-determined | Genome-fragment | NA | 2.54 | 0     |
| S9-final-viral-combined_k141_21289   | [full]   | 1169  | No  | NA  | 1  | 0 | Low-quality    | Genome-fragment | NA | 0    | 0     |
| S11-final-viral-combined_k141_38308  | [full]   | 1488  | No  | NA  | 0  | 0 | Not-determined | Genome-fragment | NA | 0    | 0     |
| S11-final-viral-combined_k141_133539 | [full]   | 1058  | No  | NA  | 0  | 1 | Not-determined | Genome-fragment | NA | 2.06 | 0     |
| S11_k141_24483                       |          | 1169  | No  | NA  | 2  | 0 | Low-quality    | Genome-fragment | NA | 2.49 | 0     |
| S1-final-viral-combined_k141_205908  | [full]   | 1169  | No  | NA  | 3  | 0 | Low-quality    | Genome-fragment | NA | 1.58 | 0     |
| S1-final-viral-combined_k141_771924  | [full]   | 1169  | No  | NA  | 0  | 0 | Low-quality    | Genome-fragment | NA | 0    | 0     |
| S11-final-viral-combined_k141_286378 | [full]   | 2079  | No  | NA  | 0  | 2 | Not-determined | Genome-fragment | NA | 0    | 0     |
| S11-final-viral-combined_k141_148345 | [full]   | 3428  | No  | NA  | 0  | 2 | Not-determined | Genome-fragment | NA | 0    | 0     |
| S11-final-viral-combined_k141_326184 | [full]   | 1763  | No  | NA  | 0  | 1 | Not-determined | Genome-fragment | NA | 0    | 0     |
| S11-final-viral-combined_k141_79790  | [full]   | 1002  | No  | NA  | 0  | 2 | Not-determined | Genome-fragment | NA | 0.8  | 0     |
| S11-final-viral-combined_k141_93262  | [full]   | 2691  | No  | NA  | 0  | 2 | Not-determined | Genome-fragment | NA | 0    | 0     |
| S11-final-viral-combined_k141_148351 | [full]   | 1415  | No  | NA  | 0  | 1 | Not-determined | Genome-fragment | NA | 0    | 0     |
| S1-final-viral-combined_k141_78730   | [H2gene] | 1169  | No  | NA  | 1  | 0 | Low-quality    | Genome-fragment | NA | 2.05 | 0     |
| S11-final-viral-combined_k141_176210 | [full]   | 12254 | No  | NA  | 10 | 0 | Not-determined | Genome-fragment | NA | 0    | 0     |
| S11-final-viral-combined_k141_162328 | [full]   | 2803  | No  | NA  | 0  | 2 | Not-determined | Genome-fragment | NA | 0    | 0     |
| S5-final-viral-combined_k141_189616  | [full]   | 1169  | No  | NA  | 0  | 2 | Low-quality    | Genome-fragment | NA | 0.53 | 0     |
| S7-final-viral-combined_k141_226011  | [full]   | 1169  | No  | NA  | 0  | 0 | Low-quality    | Genome-fragment | NA | 2.57 | 0     |
| S11-final-viral-combined_k141_93325  | [full]   | 3002  | No  | NA  | 0  | 4 | Not-determined | Genome-fragment | NA | 0    | 0     |
| S11-final-viral-combined_k141_148412 | [full]   | 3186  | No  | NA  | 0  | 2 | Not-determined | Genome-fragment | NA | 0    | 0     |
| S11-final-viral-combined_k141_245608 | [full]   | 3748  | No  | NA  | 0  | 2 | Not-determined | Genome-fragment | NA | 0    | 0     |
| S11-final-viral-combined_k141_326255 | [full]   | 2117  | No  | NA  | 0  | 0 | Not-determined | Genome-fragment | NA | 0    | 0     |
| S17-final-viral-combined_k141_185368 | [full]   | 1169  | No  | NA  | 0  | 1 | Low-quality    | Genome-fragment | NA | 2.55 | 0     |
| S11-final-viral-combined_k141_299603 | [full]   | 1820  | No  | NA  | 0  | 0 | Not-determined | Genome-fragment | NA | 0.6  | 0     |
| S2-final-viral-combined_k141_180131  | [full]   | 1169  | No  | NA  | 0  | 1 | Low-quality    | Genome-fragment | NA | 2.58 | 0     |
| S2-final-viral-combined_k141_119629  | [H2gene] | 1169  | No  | NA  | 1  | 0 | Low-quality    | Genome-fragment | NA | 3.05 | 0     |
| S2_k141_125372                       |          | 1169  | No  | NA  | 0  | 3 | Low-quality    | Genome-fragment | NA | 0    | 0     |
| S2_k141_234373                       |          | 1169  | No  | NA  | 0  | 1 | Low-quality    | Genome-fragment | NA | 1    | 0     |
| S11-final-viral-combined_k141_314054 | [full]   | 1078  | No  | NA  | 0  | 1 | Not-determined | Genome-fragment | NA | 0    | 0     |
| S4_k141_70074                        |          | 1169  | No  | NA  | 0  | 0 | Low-quality    | Genome-fragment | NA | 1.64 | 0     |
| S11-final-viral-combined_k141_65983  | [full]   | 1258  | No  | NA  | 0  | 1 | Not-determined | Genome-fragment | NA | 0    | 0     |
| S11-final-viral-combined_k141_299635 | [full]   | 9977  | No  | NA  | 0  | 2 | Not-determined | Genome-fragment | NA | 0    | 0     |
| S11-final-viral-combined_k141_314066 | [full]   | 3355  | No  | NA  | 0  | 1 | Not-determined | Genome-fragment | NA | 0    | 0     |
| S8_k141_147792                       |          | 1169  | No  | NA  | 0  | 0 | Low-quality    | Genome-fragment | NA | 1.88 | 0     |
| S11-final-viral-combined_k141_93388  | [full]   | 4997  | No  | NA  | 0  | 1 | Not-determined | Genome-fragment | NA | 0    | 0     |
| S8_k141_57259                        |          | 1169  | No  | NA  | 0  | 0 | Low-quality    | Genome-fragment | NA | 2.25 | 0     |
| S9-final-viral-combined_k141_25771   | [full]   | 1170  | No  | NA  | 0  | 2 | Low-quality    | Genome-fragment | NA | 1.96 | 0     |
| S9-final-viral-combined_k141_46702   | [full]   | 1170  | No  | NA  | 0  | 1 | Low-quality    | Genome-fragment | NA | 2.56 | 0     |
| S9_k141_12982                        |          | 1170  | No  | NA  | 1  | 0 | Low-quality    | Genome-fragment | NA | 0    | 0     |
| S11-final-viral-combined_k141_217499 | [full]   | 3368  | No  | NA  | 0  | 2 | Not-determined | Genome-fragment | NA | 0    | 0     |
| S11-final-viral-combined_k141_176231 | [full]   | 5845  | No  | NA  | 0  | 2 | Not-determined | Genome-fragment | NA | 2.54 | 0     |
| S11-final-viral-combined_k141_184028 | [H2gene] | 1170  | No  | NA  | 1  | 0 | Low-quality    | Genome-fragment | NA | 0    | 0     |
| S11-final-viral-combined_k141_10780  | [full]   | 2101  | No  | NA  | 0  | 2 | Not-determined | Genome-fragment | NA | 3.07 | 0     |
| S11-final-viral-combined_k141_23501  | [full]   | 1170  | No  | NA  | 0  | 0 | Low-quality    | Genome-fragment | NA | 1.75 | 0     |
| S11_k141_245645                      |          | 1170  | No  | NA  | 0  | 2 | Not-determined | Genome-fragment | NA | 0    | 0     |
| S11-final-viral-combined_k141_286527 | [full]   | 3901  | No  | NA  | 0  | 2 | Not-determined | Genome-fragment | NA | 2.75 | 0     |
| S1-final-viral-combined_k141_159835  | [full]   | 1170  | No  | NA  | 0  | 0 | Low-quality    | Genome-fragment | NA | 0    | 0     |
| S11-final-viral-combined_k141_161474 | [full]   | 2666  | No  | NA  | 0  | 0 | Not-determined | Genome-fragment | NA | 0    | 0     |
| S11-final-viral-combined_k141_166052 | [full]   | 7901  | No  | NA  | 0  | 6 | Not-determined | Genome-fragment | NA | 2.09 | 0     |
| S1_k141_152318                       |          | 1170  | No  | NA  | 0  | 0 | Low-quality    | Genome-fragment | NA | 2.23 | 0     |
| S1_k141_236292                       |          | 1170  | No  | NA  | 0  | 0 | Low-quality    | Genome-fragment | NA | 2.09 | 0     |
| S11-final-viral-combined_k141_217555 | [full]   | 1013  | No  | NA  | 0  | 0 | Not-determined | Genome-fragment | NA | 0    | 0     |
| S11-final-viral-combined_k141_217557 | [full]   | 2425  | No  | NA  | 0  | 0 | Not-determined | Genome-fragment | NA | 0    | 0     |
| S5-final-viral-combined_k141_166393  | [full]   | 1170  | No  | NA  | 2  | 0 | Low-quality    | Genome-fragment | NA | 2.69 | 0     |
| S11-final-viral-combined_k141_217560 | [full]   | 1066  | No  | NA  | 0  | 0 | Not-determined | Genome-fragment | NA | 0    | 0     |
| S11-final-viral-combined_k141_259209 | [full]   | 1274  | No  | NA  | 0  | 0 | Not-determined | Genome-fragment | NA | 0    | 0     |
| S11-final-viral-combined_k141_286549 | [full]   | 3433  | No  | NA  | 0  | 3 | Not-determined | Genome-fragment | NA | 0    | 0     |
| S11-final-viral-combined_k141_176392 | [full]   | 3156  | No  | NA  | 0  | 2 | Not-determined | Genome-fragment |    |      |       |



|                                      |          |       |     |       |   |     |                |                 |       |       |
|--------------------------------------|----------|-------|-----|-------|---|-----|----------------|-----------------|-------|-------|
| S2-final-viral-combined_k141_1757691 | [full]   | 1172  | No  | NA    | 0 | 1   | Low-quality    | Genome-fragment | 0.89  | 0     |
| S11-final-viral-combined_k141_52722  | [full]   | 1438  | No  | NA    | 0 | 1   | Not-determined | Genome-fragment | NA    | 0     |
| S4-final-viral-combined_k141_32145   | [H2gene] | 1172  | No  | NA    | 0 | 0   | Low-quality    | Genome-fragment | 1.27  | 0     |
| S8-final-viral-combined_k141_234012  | [full]   | 1172  | No  | NA    | 0 | 0   | Low-quality    | Genome-fragment | 2.52  | 0     |
| S11-final-viral-combined_k141_11116  | [full]   | 2205  | No  | NA    | 0 | 2   | Not-determined | Genome-fragment | NA    | 0     |
| S11-final-viral-combined_k141_289964 | [full]   | 2632  | No  | NA    | 7 | 0   | Medium-quality | Genome-fragment | 70.68 | 0     |
| S11-final-viral-combined_k141_314271 | [full]   | 1493  | No  | NA    | 0 | 0   | Not-determined | Genome-fragment | NA    | 0     |
| S11-final-viral-combined_k141_286765 | [full]   | 2758  | No  | NA    | 0 | 2   | Not-determined | Genome-fragment | NA    | 0     |
| S11-final-viral-combined_k141_176732 | [full]   | 4084  | No  | NA    | 0 | 2   | Not-determined | Genome-fragment | NA    | 0     |
| S11-final-viral-combined_k141_176586 | [full]   | 2459  | No  | NA    | 0 | 0   | Not-determined | Genome-fragment | NA    | 0     |
| S11-final-viral-combined_k141_162800 | [full]   | 1576  | No  | NA    | 0 | 0   | Not-determined | Genome-fragment | NA    | 0     |
| S11-final-viral-combined_k141_314292 | [full]   | 2791  | No  | NA    | 0 | 1   | Not-determined | Genome-fragment | NA    | 0     |
| S8-final-viral-combined_k141_216775  | [H2gene] | 1172  | No  | NA    | 1 | 0   | Low-quality    | Genome-fragment | 2.54  | 0     |
| S11-final-viral-combined_k141_271676 | [full]   | 1173  | No  | NA    | 3 | 0   | Low-quality    | Genome-fragment | 2.53  | 0     |
| S1_k141_268405                       |          | 1173  | No  | NA    | 0 | 0   | Low-quality    | Genome-fragment | 0.47  | 0     |
| S1_k141_141330                       |          | 1173  | No  | NA    | 0 | 1   | Low-quality    | Genome-fragment | 3.31  | 0     |
| S11-final-viral-combined_k141_162850 | [full]   | 2655  | No  | NA    | 0 | 4   | Not-determined | Genome-fragment | NA    | 0     |
| S3_k141_58161                        |          | 1173  | No  | NA    | 0 | 0   | Low-quality    | Genome-fragment | 1.9   | 0     |
| S11-final-viral-combined_k141_176636 | [full]   | 4554  | No  | NA    | 0 | 1   | Not-determined | Genome-fragment | NA    | 0     |
| S5-final-viral-combined_k141_6127    | [full]   | 1173  | No  | NA    | 0 | 0   | Low-quality    | Genome-fragment | 2.99  | 0     |
| S5_k141_141932                       |          | 1173  | No  | NA    | 0 | 1   | Low-quality    | Genome-fragment | 0.32  | 0     |
| S11-final-viral-combined_k141_23496  | [full]   | 1005  | No  | NA    | 0 | 2   | Not-determined | Genome-fragment | NA    | 0     |
| S12-final-viral-combined_k141_251464 | [full]   | 1173  | No  | NA    | 1 | 0   | Low-quality    | Genome-fragment | 2.54  | 0     |
| S11-final-viral-combined_k141_120395 | [full]   | 3673  | No  | NA    | 0 | 3   | Not-determined | Genome-fragment | NA    | 0     |
| S11-final-viral-combined_k141_108088 | [full]   | 3610  | No  | NA    | 0 | 3   | Not-determined | Genome-fragment | NA    | 0     |
| S12-final-viral-combined_k141_3454   | [full]   | 1173  | No  | NA    | 0 | 0   | Low-quality    | Genome-fragment | 2.59  | 0     |
| S11-final-viral-combined_k141_52861  | [full]   | 2944  | No  | NA    | 0 | 1   | Not-determined | Genome-fragment | NA    | 0     |
| S12-final-viral-combined_k141_206205 | [full]   | 1173  | No  | NA    | 0 | 0   | Low-quality    | Genome-fragment | 1.14  | 0     |
| S12_k141_145657                      |          | 1173  | No  | NA    | 0 | 1   | Low-quality    | Genome-fragment | 0.77  | 0     |
| S11-final-viral-combined_k141_203779 | [full]   | 1368  | No  | NA    | 0 | 0   | Not-determined | Genome-fragment | NA    | 0     |
| S2_k141_151046                       |          | 1173  | No  | NA    | 0 | 0   | Low-quality    | Genome-fragment | 3.55  | 0     |
| S11-final-viral-combined_k141_259326 | [full]   | 1555  | No  | NA    | 0 | 2   | Not-determined | Genome-fragment | NA    | 0     |
| S9-final-viral-combined_k141_11877   | [full]   | 1174  | No  | NA    | 0 | 1   | Low-quality    | Genome-fragment | 0.92  | 0     |
| S9_k141_15183                        |          | 1174  | No  | NA    | 0 | 2   | Low-quality    | Genome-fragment | 0.63  | 0     |
| S5-final-viral-combined_k141_189526  | [full]   | 1174  | No  | NA    | 0 | 1   | Low-quality    | Genome-fragment | 3.1   | 0     |
| S11-final-viral-combined_k141_326468 | [full]   | 1569  | No  | NA    | 0 | 2   | Not-determined | Genome-fragment | NA    | 0     |
| S5_k141_53117                        |          | 1174  | No  | NA    | 0 | 1   | Low-quality    | Genome-fragment | 3     | 0     |
| S7-final-viral-combined_k141_39488   | [H2gene] | 1174  | No  | NA    | 1 | 0   | Low-quality    | Genome-fragment | 0.37  | 0     |
| S12-final-viral-combined_k141_2844   | [full]   | 1174  | No  | NA    | 0 | 2   | Low-quality    | Genome-fragment | 1.81  | 0     |
| S11-final-viral-combined_k141_108155 | [full]   | 2332  | No  | NA    | 0 | 1   | Not-determined | Genome-fragment | NA    | 0     |
| S12-final-viral-combined_k141_36541  | [H2gene] | 1174  | No  | NA    | 1 | 0   | Low-quality    | Genome-fragment | 1.51  | 0     |
| S2-final-viral-combined_k141_147801  | [full]   | 1174  | No  | NA    | 0 | 0   | Low-quality    | Genome-fragment | 2.56  | 0     |
| S11-final-viral-combined_k141_79302  | [full]   | 2189  | No  | NA    | 0 | 1   | Not-determined | Genome-fragment | NA    | 0     |
| S11-final-viral-combined_k141_108180 | [full]   | 1168  | No  | NA    | 0 | 0   | Not-determined | Genome-fragment | NA    | 0     |
| S11-final-viral-combined_k141_217790 | [full]   | 54204 | Yes | 40062 | 5 | 6   | Medium-quality | Genome-fragment | 66.2  | 26.69 |
| S2-final-viral-combined_k141_128817  | [full]   | 1174  | No  | NA    | 2 | 0   | Low-quality    | Genome-fragment | 0.94  | 0     |
| S2-final-viral-combined_k141_25271   | [full]   | 1174  | No  | NA    | 0 | 0   | Low-quality    | Genome-fragment | 2.75  | 0     |
| S4-final-viral-combined_k141_122412  | [full]   | 1174  | No  | NA    | 1 | 0   | Low-quality    | Genome-fragment | 2.31  | 0     |
| S4_k141_107795                       |          | 1174  | No  | NA    | 0 | 1   | Low-quality    | Genome-fragment | 0.9   | 0     |
| S4_k141_117836                       |          | 1174  | No  | NA    | 0 | 1   | Low-quality    | Genome-fragment | 0.71  | 0     |
| S11-final-viral-combined_k141_148887 | [full]   | 13818 | No  | NA    | 0 | 6   | Not-determined | Genome-fragment | NA    | 0     |
| S11-final-viral-combined_k141_300273 | [full]   | 3838  | No  | NA    | 0 | 2   | Not-determined | Genome-fragment | NA    | 0     |
| S6-final-viral-combined_k141_3811    | [full]   | 1174  | No  | NA    | 1 | 0   | Low-quality    | Genome-fragment | 1.68  | 0     |
| S8-final-viral-combined_k141_163927  | [full]   | 1174  | No  | NA    | 0 | 0   | Low-quality    | Genome-fragment | 2.44  | 0     |
| S11-final-viral-combined_k141_28526  | [full]   | 2361  | No  | NA    | 0 | 0   | Not-determined | Genome-fragment | NA    | 0     |
| S8-final-viral-combined_k141_192386  | [full]   | 1174  | No  | NA    | 0 | 0   | Low-quality    | Genome-fragment | 2.05  | 0     |
| S11-final-viral-combined_k141_66410  | [full]   | 2340  | No  | NA    | 0 | 2   | Not-determined | Genome-fragment | NA    | 0     |
| S11-final-viral-combined_k141_300220 | [full]   | 5841  | No  | NA    | 0 | 1   | Not-determined | Genome-fragment | NA    | 0     |
| S11-final-viral-combined_k141_93044  | [full]   | 2080  | No  | NA    | 0 | 1   | Not-determined | Genome-fragment | NA    | 0     |
| S8_k141_84575                        |          | 1174  | No  | NA    | 1 | 0   | Low-quality    | Genome-fragment | 2.17  | 0     |
| S11-final-viral-combined_k141_231847 | [full]   | 3277  | No  | NA    | 0 | 3   | Not-determined | Genome-fragment | NA    | 0     |
| S11-final-viral-combined_k141_52991  | [full]   | 2665  | No  | NA    | 0 | 2   | Not-determined | Genome-fragment | NA    | 0     |
| S9-final-viral-combined_k141_43179   | [full]   | 1175  | No  | NA    | 0 | 0   | Low-quality    | Genome-fragment | 2.02  | 0     |
| S11-final-viral-combined_k141_246160 | [full]   | 3172  | No  | NA    | 0 | 3   | Not-determined | Genome-fragment | NA    | 0     |
| S11-final-viral-combined_k141_23416  | [full]   | 1175  | No  | NA    | 0 | 0   | Low-quality    | Genome-fragment | NA    | 0     |
| S11-final-viral-combined_k141_66488  | [full]   | 1922  | No  | NA    | 0 | 0   | Not-determined | Genome-fragment | NA    | 0     |
| S11-final-viral-combined_k141_163036 | [full]   | 1810  | No  | NA    | 0 | 1   | Not-determined | Genome-fragment | NA    | 0     |
| S11-final-viral-combined_k141_33898  | [full]   | 2959  | No  | NA    | 0 | 2   | Not-determined | Genome-fragment | NA    | 0     |
| S11-final-viral-combined_k141_18973  | [full]   | 7594  | No  | NA    | 0 | 2   | Not-determined | Genome-fragment | NA    | 0     |
| S11-final-viral-combined_k141_66558  | [full]   | 2522  | No  | NA    | 0 | 3   | Not-determined | Genome-fragment | NA    | 0     |
| S11-final-viral-combined_k141_23676  | [full]   | 2425  | No  | NA    | 0 | 3   | Not-determined | Genome-fragment | NA    | 0     |
| S11-final-viral-combined_k141_30027  | [full]   | 1877  | No  | NA    | 0 | 2   | Not-determined | Genome-fragment | NA    | 0     |
| S11-final-viral-combined_k141_120632 | [full]   | 1499  | No  | NA    | 0 | 0   | Not-determined | Genome-fragment | NA    | 0     |
| S11-final-viral-combined_k141_302505 | [full]   | 1175  | No  | NA    | 0 | 0   | Low-quality    | Genome-fragment | 0.92  | 0     |
| S1-final-viral-combined_k141_38241   | [full]   | 1175  | No  | NA    | 1 | 0   | Low-quality    | Genome-fragment | 0.47  | 0     |
| S1_k141_366987                       |          | 1175  | No  | NA    | 0 | 0   | Low-quality    | Genome-fragment | 1.76  | 0     |
| S11-final-viral-combined_k141_259765 | [full]   | 1340  | No  | NA    | 0 | 1   | Not-determined | Genome-fragment | NA    | 0     |
| S11-final-viral-combined_k141_38992  | [full]   | 1122  | No  | NA    | 0 | 1   | Not-determined | Genome-fragment | NA    | 0     |
| S1_k141_246642                       |          | 1175  | No  | NA    | 0 | 1   | Low-quality    | Genome-fragment | 2.68  | 0     |
| S11-final-viral-combined_k141_39009  | [full]   | 2521  | No  | NA    | 0 | 2   | Not-determined | Genome-fragment | NA    | 0     |
| S11-final-viral-combined_k141_39528  | [full]   | 5732  | No  | NA    | 0 | 6   | Not-determined | Genome-fragment | NA    | 0     |
| S3-final-viral-combined_k141_514519  | [H2gene] | 1175  | No  | NA    | 0 | 0   | Low-quality    | Genome-fragment | 0.27  | 0     |
| S3-final-viral-combined_k141_17879   | [H2gene] | 1175  | No  | NA    | 0 | 0   | Low-quality    | Genome-fragment | 3.22  | 0     |
| S11-final-viral-combined_k141_189779 | [full]   | 20977 | No  | NA    | 0 | 13  | Not-determined | Genome-fragment | NA    | 0     |
| S5-final-viral-combined_k141_504212  | [H2gene] | 1175  | No  | NA    | 0 | 0   | Low-quality    | Genome-fragment | NA    | 0     |
| S11-final-viral-combined_k141_272702 | [full]   | 1010  | No  | NA    | 0 | 1   | Not-determined | Genome-fragment | NA    | 0     |
| S11-final-viral-combined_k141_53200  | [full]   | 7248  | No  | NA    | 0 | 1   | Not-determined | Genome-fragment | NA    | 0     |
| S11-final-viral-combined_k141_120734 | [full]   | 1859  | No  | NA    | 0 | 1   | Not-determined | Genome-fragment | NA    | 0     |
| S11-final-viral-combined_k141_145038 | [full]   | 4432  | No  | NA    | 0 | 1   | Not-determined | Genome-fragment | NA    | 0     |
| S7-final-viral-combined_k141_128569  | [full]   | 1175  | No  | NA    | 0 | 0   | Low-quality    | Genome-fragment | 1.31  | 0     |
| S11-final-viral-combined_k141_39068  | [full]   | 5045  | No  | NA    | 0 | 2   | Not-determined | Genome-fragment | NA    | 0     |
| S7-final-viral-combined_k141_222100  | [full]   | 1175  | No  | NA    | 0 | 0   | Low-quality    | Genome-fragment | 2.76  | 0     |
| S7_k141_219413                       |          | 1175  | No  | NA    | 1 | 0   | Low-quality    | Genome-fragment | 0.74  | 0     |
| S11-final-viral-combined_k141_11421  | [full]   | 1180  | No  | NA    | 0 | 0   | Not-determined | Genome-fragment | NA    | 0     |
| S11-final-viral-combined_k141_11421  | [full]   | 5971  | No  | NA    | 0 | 5   | Not-determined | Genome-fragment | NA    | 0     |
| S11-final-viral-combined_k141_189844 | [full]   | 10912 | No  | NA    | 0 | 6   | Not-determined | Genome-fragment | NA    | 0     |
| S11-final-viral-combined_k141_326909 | [full]   | 5257  | No  | NA    | 0 | 3   | Not-determined | Genome-fragment | NA    | 0     |
| S17-final-viral-combined_k141_24759  | [H2gene] | 1175  | No  | NA    | 2 | 0   | Low-quality    | Genome-fragment | 3.13  | 0     |
| S7_k141_115246                       |          | 1175  | No  | NA    | 0 | 0   | Low-quality    | Genome-fragment | 0.19  | 0     |
| S11-final-viral-combined_k141_287200 | [full]   | 1270  | No  | NA    | 0 | 0   | Not-determined | Genome-fragment | NA    | 0     |
| S11-final-viral-combined_k141_134462 | [full]   | 1721  | No  | NA    | 0 | 2   | Not-determined | Genome-fragment | NA    | 0     |
| S11-final-viral-combined_k141_300466 | [full]   | 3280  | No  | NA    | 0 | 3   | Not-determined | Genome-fragment | NA    | 0     |
| S12-final-viral-combined_k141_376910 | [full]   | 1175  | No  | NA    | 0 | 0   | Low-quality    | Genome-fragment | 2.15  | 0     |
| S11-final-viral-combined_k141_276995 | [full]   | 2799  | No  | NA    | 0 | 1   | Not-determined | Genome-fragment | NA    | 0     |
| S11-final-viral-combined_k141_56735  | [full]   | 2356  | No  | NA    | 0 | 3   | Not-determined | Genome-fragment | NA    | 0     |
| S11-final-viral-combined_k141_189869 | [full]   | 1058  | No  | NA    | 0 | 1   | Not-determined | Genome-fragment | NA    | 0     |
| S11-final-viral-combined_k141_232051 | [full]   | 3535  | No  | NA    | 0 | 2   | Not-determined | Genome-fragment | NA    | 0     |
| S11-final-viral-combined_k141_108531 | [full]   | 2955  | No  | NA    | 0 | 2   | Not-determined | Genome-fragment | NA    | 0     |
| S11-final-viral-combined_k141_120785 | [full]   | 1363  | No  | NA    | 0 | 0   | Not-determined | Genome-fragment | NA    | 0     |
| S11-final-viral-combined_k141_108514 | [full]   | 4966  | No  | NA    | 0 | 2   | Not-determined | Genome-fragment | NA    | 0     |
| S11-final-viral-combined_k141_177022 | [full]   | 1248  | No  | NA    | 0 | 1   | Not-determined | Genome-fragment | NA    | 0     |
| S12-final-viral-combined_k141_395617 | [full]   | 1175  | No  | NA    | 0 | 0   | Low-quality    | Genome-fragment | 2.68  | 0     |
| S2_k141_104226                       |          | 1175  | No  | NA    | 0 | 0   | Low-quality    | Genome-fragment | 3.26  | 0     |
| S4_k141_79556                        |          | 1175  | No  | NA    | 1 | 0   | Low-quality    | Genome-fragment | 1.19  | 0     |
| S8-final-viral-combined_k141_186354  | [full]   | 1175  | No  | NA    | 2 | 0   | Low-quality    | Genome-fragment | 0.86  | 0     |
| S11-final-viral-combined_k141_149186 | [full]   | 1141  | No  | NA    | 0 | 1   | Not-determined | Genome-fragment | NA    | 0     |
| S9-final-viral-combined_k141_38560   | [full]   | 1176  | No  | NA    | 0 | 0   | Low-quality    | Genome-fragment | 0.44  | 0     |
| S8-final-viral-combined_k141_40981   | [full]   | 1176  | No  | NA    | 2 | 0   | Low-quality    | Genome-fragment | 2.85  | 0     |
| S9-final-viral-combined_k141_113251  | [H2gene] | 1176  | No  | NA    | 1 | 0   | Low-quality    | Genome-fragment | 2.49  | 0     |
| S11-final-viral-combined_k141_301502 | [full]   | 1176  | No  | NA    | 3 | 0   | Low-quality    | Genome-fragment | 1.87  | 0     |
| S3-final-viral-combined_k141_11153   | [full]   | 1176  | No  | NA    | 0 | 0   | Low-quality    | Genome-fragment | 1.54  | 0     |
| S3-final-viral-combined_k141_126241  | [H2gene] | 1176  | No  | NA    | 0 | 0   | Low-quality    | Genome-fragment | 1.65  | 0     |
| S7-final-viral-combined_k141_237370  | [full]   | 1176  | No  | NA    | 0 | 0   | Low-quality    | Genome-fragment | 1     | 0     |
| S7-final-viral-combined_k141_187254  | [full]   | 1176  | No  | NA    | 0 | 0   | Low-quality    | Genome-fragment | 1.14  | 0     |
| S12-final-viral-combined_k141_18121  | [H2gene] | 1176  | No  | NA    | 0 | 0   | Low-quality    | Genome-fragment | 3.14  | 0     |
| S11-final-viral-combined_k141_11572  | [full]   | 2683  | No  | NA    | 0 | 3   | Not-determined | Genome-fragment | NA    | 0     |
| S11-final-viral-combined_k141_149267 | [full]   | 2734  | No  | NA    | 0 | 3   | Not-determined | Genome-fragment | NA    | 0     |
| S12_k141_78446                       |          | 1176  | No  | NA    | 0 | 1   | Low-quality    | Genome-fragment | 0.77  | 0     |
| S11-final-viral-combined_k141_163336 | [full]   | 1607  | No  | NA    | 0 | 1   | Not-determined | Genome-fragment | NA    | 0     |
| S12-final-viral-combined_k141_177677 | [H2gene] | 1176  | No  | NA    | 1 | 0</ |                |                 |       |       |



|                                       |          |       |    |    |    |                |                 |                 |                 |      |   |
|---------------------------------------|----------|-------|----|----|----|----------------|-----------------|-----------------|-----------------|------|---|
| S11-final-viral-combined_k141_941335  | [full]   | 1889  | No | NA | 0  | 1              | Not-determined  | Genome-fragment | NA              | 2.85 | 0 |
| S9-final-viral-combined_k141_33131    | [full]   | 1178  | No | NA | 0  | 0              | Low-quality     | Genome-fragment | NA              | 0    | 0 |
| S11-final-viral-combined_k141_287511  | [full]   | 1662  | No | NA | 0  | 0              | 1               | Not-determined  | Genome-fragment | NA   | 0 |
| S11-final-viral-combined_k141_2074751 | [full]   | 1178  | No | NA | 0  | 0              | 1               | Low-quality     | Genome-fragment | 0.73 | 0 |
| S11-final-viral-combined_k141_10419   | [full]   | 1178  | No | NA | 0  | 0              | 0               | Low-quality     | Genome-fragment | 2.12 | 0 |
| S1-final-viral-combined_k141_327451   | [full]   | 1178  | No | NA | 0  | 0              | 2               | Low-quality     | Genome-fragment | 2.16 | 0 |
| S11-final-viral-combined_k141_149549  | [full]   | 1604  | No | NA | 0  | 0              | 1               | Not-determined  | Genome-fragment | NA   | 0 |
| S5-final-viral-combined_k141_59881    | [full]   | 1178  | No | NA | 1  | 0              | 0               | Low-quality     | Genome-fragment | 2.15 | 0 |
| S11-final-viral-combined_k141_327251  | [full]   | 1306  | No | NA | 0  | 0              | 1               | Not-determined  | Genome-fragment | NA   | 0 |
| S11-final-viral-combined_k141_67020   | [full]   | 1961  | No | NA | 0  | 0              | 1               | Not-determined  | Genome-fragment | NA   | 0 |
| S11-final-viral-combined_k141_2182471 | [full]   | 1220  | No | NA | 0  | 0              | 0               | Not-determined  | Genome-fragment | NA   | 0 |
| S11-final-viral-combined_k141_287261  | [full]   | 4921  | No | NA | 0  | 0              | 0               | Not-determined  | Genome-fragment | NA   | 0 |
| S5-final-viral-combined_k141_110414   | [full]   | 1178  | No | NA | 1  | 0              | 0               | Low-quality     | Genome-fragment | 1.85 | 0 |
| S11-final-viral-combined_k141_149563  | [full]   | 9238  | No | NA | 0  | 5              | Not-determined  | Genome-fragment | NA              | 0    |   |
| S5-final-viral-combined_k141_117603   | [H2gene] | 1178  | No | NA | 1  | 0              | 0               | Low-quality     | Genome-fragment | 2.23 | 0 |
| S11-final-viral-combined_k141_118591  | [full]   | 1058  | No | NA | 0  | 0              | 2               | Not-determined  | Genome-fragment | NA   | 0 |
| S11-final-viral-combined_k141_218283  | [full]   | 1329  | No | NA | 0  | 0              | 0               | Not-determined  | Genome-fragment | NA   | 0 |
| S11-final-viral-combined_k141_149569  | [full]   | 5724  | No | NA | 0  | 3              | Not-determined  | Genome-fragment | NA              | 0    |   |
| S11-final-viral-combined_k141_200761  | [full]   | 2302  | No | NA | 0  | 3              | Not-determined  | Genome-fragment | NA              | 0    |   |
| S11-final-viral-combined_k141_232358  | [full]   | 1286  | No | NA | 0  | 1              | Not-determined  | Genome-fragment | NA              | 0    |   |
| S11-final-viral-combined_k141_300762  | [full]   | 4623  | No | NA | 0  | 5              | Not-determined  | Genome-fragment | NA              | 0    |   |
| S5-final-viral-combined_k141_120991   | [H2gene] | 1178  | No | NA | 2  | 0              | 0               | Low-quality     | Genome-fragment | 2.01 | 0 |
| S11-final-viral-combined_k141_149573  | [full]   | 1785  | No | NA | 0  | 1              | Not-determined  | Genome-fragment | NA              | 0    |   |
| S11-final-viral-combined_k141_94206   | [full]   | 1225  | No | NA | 0  | 0              | 0               | Not-determined  | Genome-fragment | NA   | 0 |
| S11-final-viral-combined_k141_218294  | [full]   | 1241  | No | NA | 0  | 0              | 0               | Not-determined  | Genome-fragment | NA   | 0 |
| S11-final-viral-combined_k141_300777  | [full]   | 2855  | No | NA | 0  | 3              | Not-determined  | Genome-fragment | NA              | 0    |   |
| S7-final-viral-combined_k141_221855   | [full]   | 1178  | No | NA | 0  | 0              | 0               | Low-quality     | Genome-fragment | 1.24 | 0 |
| S7-final-viral-combined_k141_243737   | [full]   | 1178  | No | NA | 0  | 1              | Low-quality     | Genome-fragment | 2.52            | 0    |   |
| S7_k141_5955                          |          | 1178  | No | NA | 0  | 0              | 0               | Low-quality     | Genome-fragment | 2.87 | 0 |
| S11-final-viral-combined_k141_232381  | [full]   | 2659  | No | NA | 0  | 1              | Not-determined  | Genome-fragment | NA              | 0    |   |
| S17-final-viral-combined_k141_225934  | [H2gene] | 1178  | No | NA | 1  | 0              | 0               | Low-quality     | Genome-fragment | 3.88 | 0 |
| S11-final-viral-combined_k141_39816   | [full]   | 3186  | No | NA | 2  | 2              | Not-determined  | Genome-fragment | NA              | 0    |   |
| S11-final-viral-combined_k141_300795  | [full]   | 1967  | No | NA | 0  | 0              | 0               | Not-determined  | Genome-fragment | NA   | 0 |
| S11-final-viral-combined_k141_218314  | [full]   | 3111  | No | NA | 0  | 2              | Not-determined  | Genome-fragment | NA              | 0    |   |
| S11-final-viral-combined_k141_57111   | [full]   | 3318  | No | NA | 0  | 3              | Not-determined  | Genome-fragment | NA              | 0    |   |
| S11-final-viral-combined_k141_248860  | [full]   | 2451  | No | NA | 0  | 1              | Not-determined  | Genome-fragment | NA              | 0    |   |
| S11-final-viral-combined_k141_11918   | [full]   | 2298  | No | NA | 0  | 3              | Not-determined  | Genome-fragment | NA              | 0    |   |
| S2_k141_48539                         |          | 1178  | No | NA | 0  | 0              | 0               | Low-quality     | Genome-fragment | 3.22 | 0 |
| S2_k141_89081                         |          | 1178  | No | NA | 0  | 1              | Low-quality     | Genome-fragment | 3.96            | 0    |   |
| S4_k141_36994                         |          | 1178  | No | NA | 0  | 0              | 0               | Low-quality     | Genome-fragment | 3.2  | 0 |
| S6-final-viral-combined_k141_113300   | [H2gene] | 1178  | No | NA | 1  | 0              | 0               | Low-quality     | Genome-fragment | 2.69 | 0 |
| S11-final-viral-combined_k141_149626  | [full]   | 1818  | No | NA | 0  | 2              | Not-determined  | Genome-fragment | NA              | 0    |   |
| S11-final-viral-combined_k141_273141  | [full]   | 1454  | No | NA | 0  | 2              | Not-determined  | Genome-fragment | NA              | 0    |   |
| S11-final-viral-combined_k141_314841  | [full]   | 3042  | No | NA | 0  | 3              | Not-determined  | Genome-fragment | NA              | 0    |   |
| S8-final-viral-combined_k141_57209    | [full]   | 1178  | No | NA | 0  | 0              | 0               | Low-quality     | Genome-fragment | 2.89 | 0 |
| S9-final-viral-combined_k141_14380    | [full]   | 1179  | No | NA | 0  | 0              | 0               | Low-quality     | Genome-fragment | 2.52 | 0 |
| S9_k141_102230                        |          | 1179  | No | NA | 0  | 0              | 0               | Low-quality     | Genome-fragment | 1.97 | 0 |
| S11-final-viral-combined_k141_53659   | [full]   | 2212  | No | NA | 0  | 2              | Not-determined  | Genome-fragment | NA              | 0    |   |
| S1-final-viral-combined_k141_181771   | [full]   | 1179  | No | NA | 0  | 1              | Low-quality     | Genome-fragment | 0.59            | 0    |   |
| S3-final-viral-combined_k141_32553    | [full]   | 1179  | No | NA | 0  | 0              | 0               | Low-quality     | Genome-fragment | 2.49 | 0 |
| S11-final-viral-combined_k141_16388   | [full]   | 1239  | No | NA | 0  | 1              | Not-determined  | Genome-fragment | NA              | 0    |   |
| S11-final-viral-combined_k141_53678   | [full]   | 1079  | No | NA | 0  | 1              | Not-determined  | Genome-fragment | NA              | 0    |   |
| S11-final-viral-combined_k141_327401  | [full]   | 2976  | No | NA | 0  | 3              | Not-determined  | Genome-fragment | NA              | 0    |   |
| S11-final-viral-combined_k141_377536  | [full]   | 1356  | No | NA | 0  | 0              | 0               | Not-determined  | Genome-fragment | NA   | 0 |
| S3-final-viral-combined_k141_4568     | [full]   | 1179  | No | NA | 0  | 0              | 0               | Low-quality     | Genome-fragment | 0.84 | 0 |
| S7-final-viral-combined_k141_3097     | [full]   | 1179  | No | NA | 1  | 0              | 0               | Low-quality     | Genome-fragment | 2.92 | 0 |
| S7-final-viral-combined_k141_209842   | [full]   | 1179  | No | NA | 0  | 0              | 0               | Low-quality     | Genome-fragment | 2.22 | 0 |
| S2-final-viral-combined_k141_142120   | [full]   | 1179  | No | NA | 0  | 0              | 0               | Low-quality     | Genome-fragment | 2.08 | 0 |
| S11-final-viral-combined_k141_67193   | [full]   | 1489  | No | NA | 0  | 2              | Not-determined  | Genome-fragment | NA              | 0    |   |
| S11-final-viral-combined_k141_67204   | [full]   | 1531  | No | NA | 0  | 3              | Not-determined  | Genome-fragment | NA              | 0    |   |
| S4_k141_116818                        |          | 1179  | No | NA | 0  | 0              | 0               | Low-quality     | Genome-fragment | 2.43 | 0 |
| S8-final-viral-combined_k141_62412    | [full]   | 1179  | No | NA | 0  | 0              | 0               | Low-quality     | Genome-fragment | 1.38 | 0 |
| S1-final-viral-combined_k141_239630   | [full]   | 1180  | No | NA | 0  | 1              | Low-quality     | Genome-fragment | 0.54            | 0    |   |
| S11-final-viral-combined_k141_135052  | [full]   | 1804  | No | NA | 0  | 2              | Not-determined  | Genome-fragment | NA              | 0    |   |
| S1-final-viral-combined_k141_59282    | [full]   | 1180  | No | NA | 0  | 0              | 0               | Low-quality     | Genome-fragment | 0.79 | 0 |
| S3-final-viral-combined_k141_86000    | [H2gene] | 1180  | No | NA | 2  | 0              | 0               | Low-quality     | Genome-fragment | 2.54 | 0 |
| S11-final-viral-combined_k141_135076  | [full]   | 2620  | No | NA | 0  | 1              | Not-determined  | Genome-fragment | NA              | 0    |   |
| S17-final-viral-combined_k141_71068   | [H2gene] | 1180  | No | NA | 2  | 0              | 0               | Low-quality     | Genome-fragment | 3.05 | 0 |
| S7_k141_204970                        |          | 1180  | No | NA | 1  | 0              | 0               | Low-quality     | Genome-fragment | 1.11 | 0 |
| S11-final-viral-combined_k141_287787  | [full]   | 3604  | No | NA | 0  | 0              | 0               | Not-determined  | Genome-fragment | NA   | 0 |
| S12-final-viral-combined_k141_189237  | [full]   | 1180  | No | NA | 0  | 0              | 0               | Low-quality     | Genome-fragment | 2.03 | 0 |
| S11-final-viral-combined_k141_327906  | [full]   | 1813  | No | NA | 0  | 0              | 0               | Low-quality     | Genome-fragment | NA   | 0 |
| S12-final-viral-combined_k141_378109  | [full]   | 1180  | No | NA | 1  | 0              | 0               | Low-quality     | Genome-fragment | 2.67 | 0 |
| S11-final-viral-combined_k141_327515  | [full]   | 5378  | No | NA | 0  | 2              | Not-determined  | Genome-fragment | NA              | 0    |   |
| S11-final-viral-combined_k141_135151  | [full]   | 1836  | No | NA | 0  | 1              | Not-determined  | Genome-fragment | NA              | 0    |   |
| S11-final-viral-combined_k141_300884  | [full]   | 1226  | No | NA | 0  | 1              | Not-determined  | Genome-fragment | NA              | 0    |   |
| S2-final-viral-combined_k141_55686    | [full]   | 1180  | No | NA | 0  | 0              | 0               | Low-quality     | Genome-fragment | 2.31 | 0 |
| S11-final-viral-combined_k141_177619  | [full]   | 5825  | No | NA | 0  | 1              | Not-determined  | Genome-fragment | NA              | 0    |   |
| S11-final-viral-combined_k141_247052  | [full]   | 1889  | No | NA | 0  | 1              | Not-determined  | Genome-fragment | NA              | 0    |   |
| S4-final-viral-combined_k141_71645    | [full]   | 1180  | No | NA | 0  | 0              | 0               | Low-quality     | Genome-fragment | 2.76 | 0 |
| S11_k141_145671                       |          | 1181  | No | NA | 0  | 0              | 0               | Low-quality     | Genome-fragment | 2.5  | 0 |
| S11-final-viral-combined_k141_109071  | [full]   | 3147  | No | NA | 0  | 1              | Not-determined  | Genome-fragment | NA              | 0    |   |
| S1-final-viral-combined_k141_360582   | [full]   | 1181  | No | NA | 0  | 2              | Low-quality     | Genome-fragment | 0.75            | 0    |   |
| S11-final-viral-combined_k141_53770   | [full]   | 1760  | No | NA | 0  | 1              | Not-determined  | Genome-fragment | NA              | 0    |   |
| S11-final-viral-combined_k141_190491  | [full]   | 1243  | No | NA | 0  | 1              | Not-determined  | Genome-fragment | NA              | 0    |   |
| S11-final-viral-combined_k141_327565  | [full]   | 1983  | No | NA | 0  | 0              | 0               | Not-determined  | Genome-fragment | NA   | 0 |
| S1_k141_51933                         |          | 1181  | No | NA | 0  | 0              | 0               | Low-quality     | Genome-fragment | 1.75 | 0 |
| S11-final-viral-combined_k141_190424  | [full]   | 5442  | No | NA | 0  | 1              | Not-determined  | Genome-fragment | NA              | 0    |   |
| S11-final-viral-combined_k141_165916  | [full]   | 4063  | No | NA | 3  | Not-determined | Genome-fragment | NA              | 0               | 0    |   |
| S1_k141_193370                        |          | 1181  | No | NA | 1  | 0              | 0               | Low-quality     | Genome-fragment | 1.43 | 0 |
| S3-final-viral-combined_k141_105525   | [full]   | 1181  | No | NA | 0  | 0              | 0               | Low-quality     | Genome-fragment | 3.21 | 0 |
| S5-final-viral-combined_k141_176141   | [full]   | 1181  | No | NA | 0  | 1              | Low-quality     | Genome-fragment | 3.21            | 0    |   |
| S11-final-viral-combined_k141_39912   | [full]   | 1553  | No | NA | 0  | 0              | 0               | Not-determined  | Genome-fragment | NA   | 0 |
| S5-final-viral-combined_k141_160659   | [H2gene] | 1181  | No | NA | 1  | 0              | 0               | Low-quality     | Genome-fragment | 1.77 | 0 |
| S11-final-viral-combined_k141_39918   | [full]   | 2254  | No | NA | 0  | 1              | Not-determined  | Genome-fragment | NA              | 0    |   |
| S7-final-viral-combined_k141_234938   | [full]   | 1181  | No | NA | 0  | 0              | 0               | Low-quality     | Genome-fragment | 2.46 | 0 |
| S11-final-viral-combined_k141_315046  | [full]   | 1471  | No | NA | 0  | 0              | 0               | Not-determined  | Genome-fragment | NA   | 0 |
| S17-final-viral-combined_k141_33740   | [full]   | 1181  | No | NA | 0  | 0              | 0               | Low-quality     | Genome-fragment | 1.89 | 0 |
| S11-final-viral-combined_k141_39930   | [full]   | 1404  | No | NA | 0  | 0              | 0               | Not-determined  | Genome-fragment | NA   | 0 |
| S11-final-viral-combined_k141_94498   | [full]   | 3503  | No | NA | 0  | 4              | Not-determined  | Genome-fragment | NA              | 0    |   |
| S11-final-viral-combined_k141_204522  | [full]   | 30685 | No | NA | 12 | 0              | Medium-quality  | Genome-fragment | 66.54           | 0    |   |
| S11-final-viral-combined_k141_672791  | [full]   | 3404  | No | NA | 0  | 0              | Not-determined  | Genome-fragment | NA              | 0    |   |
| S12-final-viral-combined_k141_121545  | [full]   | 1181  | No | NA | 1  | 0              | 0               | Low-quality     | Genome-fragment | 1.91 | 0 |
| S12-final-viral-combined_k141_361985  | [full]   | 1181  | No | NA | 0  | 0              | 0               | Low-quality     | Genome-fragment | 1.88 | 0 |
| S12-final-viral-combined_k141_249522  | [full]   | 1181  | No | NA | 0  | 1              | Low-quality     | Genome-fragment | 0.36            | 0    |   |
| S12_k141_232515                       |          | 1181  | No | NA | 0  | 0              | 0               | Low-quality     | Genome-fragment | 3.02 | 0 |
| S12_k141_114490                       |          | 1181  | No | NA | 0  | 2              | Low-quality     | Genome-fragment | 0.49            | 0    |   |
| S11-final-viral-combined_k141_164006  | [full]   | 1523  | No | NA | 0  | 0              | 0               | Not-determined  | Genome-fragment | NA   | 0 |
| S4-final-viral-combined_k141_134635   | [full]   | 1181  | No | NA | 0  | 1              | Low-quality     | Genome-fragment | 1.63            | 0    |   |
| S11-final-viral-combined_k141_232649  | [full]   | 1890  | No | NA | 0  | 0              | 0               | Not-determined  | Genome-fragment | NA   | 0 |
| S11-final-viral-combined_k141_190522  | [full]   | 1894  | No | NA | 0  | 1              | Not-determined  | Genome-fragment | NA              | 0    |   |
| S11-final-viral-combined_k141_247182  | [full]   | 2407  | No | NA | 0  | 0              | 0               | Not-determined  | Genome-fragment | NA   | 0 |
| S11-final-viral-combined_k141_190526  | [full]   | 1183  | No | NA | 0  | 1              | Not-determined  | Genome-fragment | NA              | 0    |   |
| S11-final-viral-combined_k141_288028  | [full]   | 1221  | No | NA | 0  | 0              | 0               | Not-determined  | Genome-fragment | NA   | 0 |
| S4-final-viral-combined_k141_137851   | [full]   | 1181  | No | NA | 1  | 1              | Low-quality     | Genome-fragment | 1.28            | 0    |   |
| S11-final-viral-combined_k141_80324   | [full]   | 1372  | No | NA | 0  | 0              | 0               | Not-determined  | Genome-fragment | NA   | 0 |
| S6-final-viral-combined_k141_76479    | [full]   | 1181  | No | NA | 0  | 0              | 0               | Low-quality     | Genome-fragment | 0.78 | 0 |
| S11-final-viral-combined_k141_288046  | [full]   | 1549  | No | NA | 0  | 2              | Not-determined  | Genome-fragment | NA              | 0    |   |
| S11-final-viral-combined_k141_135223  | [full]   | 1464  | No | NA | 0  | 0              | 0               | Not-determined  | Genome-fragment | NA   | 0 |
| S11-final-viral-combined_k141_53880   | [full]   | 1701  | No | NA | 0  | 2              | Not-determined  | Genome-fragment | NA              | 0    |   |
| S11-final-viral-combined_k141_94598   | [full]   | 2479  | No | NA | 0  | 3              | Not-determined  | Genome-fragment | NA              | 0    |   |
| S11-final-viral-combined_k141_164043  | [full]   | 2059  | No | NA | 0  | 0              | 0               | Not-determined  | Genome-fragment | NA   | 0 |
| S11-final-viral-combined_k141_247220  | [full]   | 1640  | No | NA | 0  | 1              | Not-determined  | Genome-fragment | NA              | 0    |   |
| S11-final-viral-combined_k141_149592  | [full]   | 1639  | No | NA | 0  | 0              | 0               | Not-determined  | Genome-fragment | NA   | 0 |
| S11-final-viral-combined_k141_121616  | [full]   | 1471  | No | NA | 0  | 1              | Not-determined  | Genome-fragment | NA</            |      |   |



|                                      |          |      |    |    |   |   |                |                 |    |      |   |
|--------------------------------------|----------|------|----|----|---|---|----------------|-----------------|----|------|---|
| S11-final-viral-combined_k141_40306  | [full]   | 1937 | No | NA | 0 | 2 | Not-determined | Genome-fragment | NA | 0    | 0 |
| S1_k141_193675                       |          | 1183 | No | NA | 0 | 0 | Low-quality    | Genome-fragment | NA | 0.77 | 0 |
| S11-final-viral-combined_k141_247376 | [full]   | 1327 | No | NA | 0 | 0 | Not-determined | Genome-fragment | NA | 0    | 0 |
| S11-final-viral-combined_k141_150192 | [full]   | 4416 | No | NA | 0 | 0 | Not-determined | Genome-fragment | NA | 0    | 0 |
| S11-final-viral-combined_k141_273646 | [full]   | 3588 | No | NA | 0 | 1 | Not-determined | Genome-fragment | NA | 0    | 0 |
| S17-final-viral-combined_k141_254258 | [full]   | 1183 | No | NA | 1 | 0 | Low-quality    | Genome-fragment | NA | 2.87 | 0 |
| S11-final-viral-combined_k141_150210 | [full]   | 1758 | No | NA | 0 | 2 | Not-determined | Genome-fragment | NA | 0    | 0 |
| S11-final-viral-combined_k141_67643  | [full]   | 7699 | No | NA | 0 | 2 | Not-determined | Genome-fragment | NA | 0.82 | 0 |
| S17-k141_115366                      |          | 1183 | No | NA | 0 | 0 | Low-quality    | Genome-fragment | NA | 0.67 | 0 |
| S12_k141_70007                       |          | 1183 | No | NA | 0 | 0 | Low-quality    | Genome-fragment | NA | 0.67 | 0 |
| S11-final-viral-combined_k141_260837 | [full]   | 9683 | No | NA | 0 | 4 | Not-determined | Genome-fragment | NA | 0    | 0 |
| S2-final-viral-combined_k141_214549  | [full]   | 1183 | No | NA | 0 | 0 | Low-quality    | Genome-fragment | NA | 2.19 | 0 |
| S2-final-viral-combined_k141_185872  | [H2gene] | 1183 | No | NA | 0 | 0 | Low-quality    | Genome-fragment | NA | 2.76 | 0 |
| S2_k141_63579                        |          | 1183 | No | NA | 0 | 1 | Low-quality    | Genome-fragment | NA | 0.31 | 0 |
| S11-final-viral-combined_k141_301161 | [full]   | 3371 | No | NA | 0 | 2 | Not-determined | Genome-fragment | NA | 0    | 0 |
| S11-final-viral-combined_k141_121824 | [full]   | 1965 | No | NA | 0 | 0 | Not-determined | Genome-fragment | NA | 0    | 0 |
| S2_k141_131801                       |          | 1183 | No | NA | 0 | 0 | Low-quality    | Genome-fragment | NA | 1.23 | 0 |
| S6-final-viral-combined_k141_103191  | [full]   | 1183 | No | NA | 0 | 0 | Low-quality    | Genome-fragment | NA | 0.91 | 0 |
| S9_k141_102680                       |          | 1183 | No | NA | 0 | 0 | Low-quality    | Genome-fragment | NA | 7.61 | 0 |
| S11-final-viral-combined_k141_178107 | [full]   | 1125 | No | NA | 0 | 1 | Not-determined | Genome-fragment | NA | 0    | 0 |
| S11-final-viral-combined_k141_40383  | [full]   | 1214 | No | NA | 0 | 0 | Not-determined | Genome-fragment | NA | 0    | 0 |
| S11-final-viral-combined_k141_200301 | [full]   | 1184 | No | NA | 0 | 0 | Low-quality    | Genome-fragment | NA | 2.07 | 0 |
| S11-final-viral-combined_k141_125641 | [full]   | 2530 | No | NA | 0 | 2 | Not-determined | Genome-fragment | NA | 0    | 0 |
| S11-final-viral-combined_k141_135631 | [full]   | 2304 | No | NA | 0 | 2 | Not-determined | Genome-fragment | NA | 0    | 0 |
| S11-final-viral-combined_k141_327900 | [full]   | 3173 | No | NA | 0 | 2 | Not-determined | Genome-fragment | NA | 0    | 0 |
| S11-final-viral-combined_k141_327903 | [full]   | 1782 | No | NA | 0 | 2 | Not-determined | Genome-fragment | NA | 0    | 0 |
| S1-final-viral-combined_k141_250855  | [full]   | 1184 | No | NA | 3 | 0 | Low-quality    | Genome-fragment | NA | 2.95 | 0 |
| S11-final-viral-combined_k141_288277 | [full]   | 5935 | No | NA | 0 | 4 | Not-determined | Genome-fragment | NA | 0    | 0 |
| S1-final-viral-combined_k141_303021  | [full]   | 1184 | No | NA | 0 | 0 | Low-quality    | Genome-fragment | NA | 2.89 | 0 |
| S11-final-viral-combined_k141_301257 | [full]   | 2657 | No | NA | 0 | 2 | Not-determined | Genome-fragment | NA | 0    | 0 |
| S1-final-viral-combined_k141_109605  | [full]   | 1184 | No | NA | 0 | 0 | Low-quality    | Genome-fragment | NA | 1.81 | 0 |
| S11-final-viral-combined_k141_135641 | [full]   | 1881 | No | NA | 0 | 1 | Not-determined | Genome-fragment | NA | 0    | 0 |
| S11-final-viral-combined_k141_190922 | [full]   | 1391 | No | NA | 0 | 2 | Not-determined | Genome-fragment | NA | 0    | 0 |
| S11-final-viral-combined_k141_327931 | [full]   | 1145 | No | NA | 0 | 2 | Not-determined | Genome-fragment | NA | 0    | 0 |
| S11-final-viral-combined_k141_130975 | [full]   | 1973 | No | NA | 0 | 1 | Not-determined | Genome-fragment | NA | 0    | 0 |
| S1-final-viral-combined_k141_31380   | [H2gene] | 1184 | No | NA | 0 | 1 | Low-quality    | Genome-fragment | NA | 2.46 | 0 |
| S1-final-viral-combined_k141_390483  | [H2gene] | 1184 | No | NA | 1 | 0 | Low-quality    | Genome-fragment | NA | 2.79 | 0 |
| S1_k141_170410                       |          | 1184 | No | NA | 0 | 1 | Low-quality    | Genome-fragment | NA | 0.44 | 0 |
| S11-final-viral-combined_k141_109637 | [full]   | 1292 | No | NA | 0 | 2 | Not-determined | Genome-fragment | NA | 0    | 0 |
| S11-final-viral-combined_k141_150384 | [full]   | 1727 | No | NA | 0 | 0 | Not-determined | Genome-fragment | NA | 0    | 0 |
| S11-final-viral-combined_k141_150388 | [full]   | 1844 | No | NA | 0 | 1 | Not-determined | Genome-fragment | NA | 0    | 0 |
| S7_k141_75336                        |          | 1184 | No | NA | 0 | 2 | Low-quality    | Genome-fragment | NA | 0.77 | 0 |
| S17-k141_193920                      |          | 1184 | No | NA | 0 | 0 | Low-quality    | Genome-fragment | NA | 1.61 | 0 |
| S11-final-viral-combined_k141_164284 | [full]   | 1228 | No | NA | 0 | 3 | Not-determined | Genome-fragment | NA | 0    | 0 |
| S12-final-viral-combined_k141_8188   | [full]   | 1184 | No | NA | 0 | 0 | Low-quality    | Genome-fragment | NA | 3.17 | 0 |
| S11-final-viral-combined_k141_124371 | [full]   | 1567 | No | NA | 0 | 1 | Not-determined | Genome-fragment | NA | 0    | 0 |
| S11-final-viral-combined_k141_67845  | [full]   | 1609 | No | NA | 0 | 1 | Not-determined | Genome-fragment | NA | 0    | 0 |
| S12-final-viral-combined_k141_350420 | [full]   | 1184 | No | NA | 1 | 0 | Low-quality    | Genome-fragment | NA | 2.52 | 0 |
| S11-final-viral-combined_k141_806001 | [full]   | 1465 | No | NA | 0 | 1 | Not-determined | Genome-fragment | NA | 0    | 0 |
| S11-final-viral-combined_k141_191505 | [full]   | 1791 | No | NA | 0 | 1 | Not-determined | Genome-fragment | NA | 0    | 0 |
| S11-final-viral-combined_k141_273868 | [full]   | 1985 | No | NA | 0 | 2 | Not-determined | Genome-fragment | NA | 0    | 0 |
| S12_k141_242322                      |          | 1184 | No | NA | 0 | 1 | Not-determined | Genome-fragment | NA | 1.96 | 0 |
| S11-final-viral-combined_k141_204970 | [full]   | 2173 | No | NA | 0 | 1 | Not-determined | Genome-fragment | NA | 0    | 0 |
| S2-final-viral-combined_k141_219177  | [full]   | 1184 | No | NA | 1 | 0 | Low-quality    | Genome-fragment | NA | 1.73 | 0 |
| S11-final-viral-combined_k141_247594 | [full]   | 6155 | No | NA | 0 | 3 | Not-determined | Genome-fragment | NA | 0    | 0 |
| S8-final-viral-combined_k141_108233  | [full]   | 1184 | No | NA | 0 | 0 | Low-quality    | Genome-fragment | NA | 0.68 | 0 |
| S11-final-viral-combined_k141_109719 | [full]   | 1728 | No | NA | 0 | 1 | Not-determined | Genome-fragment | NA | 0    | 0 |
| S11-final-viral-combined_k141_40545  | [full]   | 1185 | No | NA | 0 | 1 | Low-quality    | Genome-fragment | NA | 1.97 | 0 |
| S11-final-viral-combined_k141_122010 | [full]   | 791  | No | NA | 0 | 1 | Not-determined | Genome-fragment | NA | 0    | 0 |
| S11-final-viral-combined_k141_54280  | [full]   | 3638 | No | NA | 0 | 0 | Not-determined | Genome-fragment | NA | 0    | 0 |
| S11-final-viral-combined_k141_328025 | [full]   | 5836 | No | NA | 0 | 4 | Not-determined | Genome-fragment | NA | 0    | 0 |
| S11-final-viral-combined_k141_350212 | [full]   | 2410 | No | NA | 0 | 0 | Not-determined | Genome-fragment | NA | 0    | 0 |
| S11_k141_30556                       |          | 1185 | No | NA | 1 | 0 | Low-quality    | Genome-fragment | NA | 2.04 | 0 |
| S11-final-viral-combined_k141_288422 | [full]   | 2361 | No | NA | 0 | 1 | Not-determined | Genome-fragment | NA | 0    | 0 |
| S11-final-viral-combined_k141_679151 | [full]   | 1158 | No | NA | 0 | 0 | Not-determined | Genome-fragment | NA | 0    | 0 |
| S11-final-viral-combined_k141_80708  | [full]   | 1024 | No | NA | 0 | 2 | Not-determined | Genome-fragment | NA | 0    | 0 |
| S11-final-viral-combined_k141_315601 | [full]   | 2014 | No | NA | 0 | 1 | Not-determined | Genome-fragment | NA | 0    | 0 |
| S1-final-viral-combined_k141_348217  | [full]   | 1185 | No | NA | 0 | 0 | Low-quality    | Genome-fragment | NA | 1.02 | 0 |
| S11-final-viral-combined_k141_219078 | [full]   | 2310 | No | NA | 0 | 2 | Not-determined | Genome-fragment | NA | 0    | 0 |
| S11-final-viral-combined_k141_135832 | [full]   | 1541 | No | NA | 0 | 1 | Not-determined | Genome-fragment | NA | 0    | 0 |
| S11-final-viral-combined_k141_301389 | [full]   | 3150 | No | NA | 0 | 2 | Not-determined | Genome-fragment | NA | 0    | 0 |
| S11-final-viral-combined_k141_274080 | [full]   | 3273 | No | NA | 0 | 3 | Not-determined | Genome-fragment | NA | 0    | 0 |
| S1-final-viral-combined_k141_372440  | [full]   | 1185 | No | NA | 0 | 1 | Low-quality    | Genome-fragment | NA | 9.49 | 0 |
| S11-final-viral-combined_k141_122075 | [full]   | 1078 | No | NA | 0 | 0 | Not-determined | Genome-fragment | NA | 0    | 0 |
| S11-final-viral-combined_k141_131651 | [full]   | 2619 | No | NA | 0 | 3 | Not-determined | Genome-fragment | NA | 0    | 0 |
| S6-final-viral-combined_k141_82132   | [full]   | 1185 | No | NA | 1 | 0 | Low-quality    | Genome-fragment | NA | 0.78 | 0 |
| S11-final-viral-combined_k141_128041 | [full]   | 3022 | No | NA | 0 | 1 | Not-determined | Genome-fragment | NA | 0    | 0 |
| S11-final-viral-combined_k141_233322 | [full]   | 3682 | No | NA | 0 | 6 | Not-determined | Genome-fragment | NA | 0    | 0 |
| S6-final-viral-combined_k141_158247  | [full]   | 1185 | No | NA | 0 | 0 | Low-quality    | Genome-fragment | NA | 0.68 | 0 |
| S11-final-viral-combined_k141_315674 | [full]   | 1778 | No | NA | 0 | 1 | Not-determined | Genome-fragment | NA | 0    | 0 |
| S11-final-viral-combined_k141_301444 | [full]   | 2584 | No | NA | 0 | 3 | Not-determined | Genome-fragment | NA | 0    | 0 |
| S11-final-viral-combined_k141_544541 | [full]   | 1702 | No | NA | 0 | 2 | Not-determined | Genome-fragment | NA | 0    | 0 |
| S5_k141_126809                       |          | 1185 | No | NA | 0 | 0 | Low-quality    | Genome-fragment | NA | 2.86 | 0 |
| S11-final-viral-combined_k141_135934 | [full]   | 5264 | No | NA | 0 | 4 | Not-determined | Genome-fragment | NA | 0    | 0 |
| S11-final-viral-combined_k141_288610 | [full]   | 2083 | No | NA | 0 | 1 | Not-determined | Genome-fragment | NA | 0    | 0 |
| S7_k141_150040                       |          | 1185 | No | NA | 0 | 0 | Low-quality    | Genome-fragment | NA | 2.17 | 0 |
| S11-final-viral-combined_k141_233370 | [full]   | 2004 | No | NA | 0 | 2 | Not-determined | Genome-fragment | NA | 0    | 0 |
| S11-final-viral-combined_k141_247835 | [full]   | 2222 | No | NA | 0 | 2 | Not-determined | Genome-fragment | NA | 0    | 0 |
| S11-final-viral-combined_k141_135946 | [full]   | 2674 | No | NA | 0 | 2 | Not-determined | Genome-fragment | NA | 0    | 0 |
| S11-final-viral-combined_k141_301482 | [full]   | 3005 | No | NA | 0 | 1 | Not-determined | Genome-fragment | NA | 0    | 0 |
| S11-final-viral-combined_k141_219172 | [full]   | 3655 | No | NA | 0 | 3 | Not-determined | Genome-fragment | NA | 0    | 0 |
| S11-final-viral-combined_k141_315788 | [full]   | 3274 | No | NA | 0 | 3 | Not-determined | Genome-fragment | NA | 0    | 0 |
| S11-final-viral-combined_k141_261182 | [full]   | 7049 | No | NA | 0 | 4 | Not-determined | Genome-fragment | NA | 0    | 0 |
| S11-final-viral-combined_k141_219179 | [full]   | 2822 | No | NA | 0 | 1 | Not-determined | Genome-fragment | NA | 0    | 0 |
| S12-final-viral-combined_k141_698761 | [full]   | 1185 | No | NA | 0 | 0 | Low-quality    | Genome-fragment | NA | 2.17 | 0 |
| S11-final-viral-combined_k141_205155 | [full]   | 1801 | No | NA | 0 | 0 | Not-determined | Genome-fragment | NA | 0    | 0 |
| S12-final-viral-combined_k141_311441 | [full]   | 1185 | No | NA | 0 | 0 | Low-quality    | Genome-fragment | NA | 1.1  | 0 |
| S8-final-viral-combined_k141_197774  | [full]   | 1185 | No | NA | 0 | 0 | Low-quality    | Genome-fragment | NA | 0.95 | 0 |
| S11-final-viral-combined_k141_407991 | [full]   | 1318 | No | NA | 0 | 1 | Not-determined | Genome-fragment | NA | 0    | 0 |
| S11-final-viral-combined_k141_25222  | [full]   | 1720 | No | NA | 0 | 2 | Not-determined | Genome-fragment | NA | 0    | 0 |
| S11-final-viral-combined_k141_219200 | [full]   | 1149 | No | NA | 0 | 1 | Not-determined | Genome-fragment | NA | 0    | 0 |
| S11-final-viral-combined_k141_274121 | [full]   | 1218 | No | NA | 0 | 1 | Not-determined | Genome-fragment | NA | 0    | 0 |
| S8-final-viral-combined_k141_186398  | [H2gene] | 1185 | No | NA | 2 | 0 | Low-quality    | Genome-fragment | NA | 2.19 | 0 |
| S11-final-viral-combined_k141_186126 | [full]   | 1152 | No | NA | 0 | 1 | Not-determined | Genome-fragment | NA | 0    | 0 |
| S11-final-viral-combined_k141_219206 | [full]   | 1612 | No | NA | 0 | 2 | Not-determined | Genome-fragment | NA | 0    | 0 |
| S9-final-viral-combined_k141_94703   | [full]   | 1186 | No | NA | 0 | 0 | Low-quality    | Genome-fragment | NA | 2.99 | 0 |
| S7-final-viral-combined_k141_125265  | [H2gene] | 1186 | No | NA | 1 | 0 | Low-quality    | Genome-fragment | NA | 0.68 | 0 |
| S17-k141_171229                      |          | 1186 | No | NA | 2 | 0 | Low-quality    | Genome-fragment | NA | 3.16 | 0 |
| S11-final-viral-combined_k141_95220  | [full]   | 1475 | No | NA | 0 | 0 | Not-determined | Genome-fragment | NA | 0    | 0 |
| S12-final-viral-combined_k141_163170 | [full]   | 1186 | No | NA | 2 | 0 | Low-quality    | Genome-fragment | NA | 2.92 | 0 |
| S4-final-viral-combined_k141_136233  | [full]   | 1186 | No | NA | 0 | 1 | Low-quality    | Genome-fragment | NA | 0.69 | 0 |
| S8-final-viral-combined_k141_175811  | [full]   | 1186 | No | NA | 0 | 0 | Low-quality    | Genome-fragment | NA | 7.56 | 0 |
| S11-final-viral-combined_k141_95225  | [full]   | 8766 | No | NA | 0 | 2 | Not-determined | Genome-fragment | NA | 0    | 0 |
| S11-final-viral-combined_k141_25252  | [full]   | 2644 | No | NA | 0 | 2 | Not-determined | Genome-fragment | NA | 0    | 0 |
| S11-final-viral-combined_k141_68174  | [full]   | 2916 | No | NA | 0 | 2 | Not-determined | Genome-fragment | NA | 0    | 0 |
| S11-final-viral-combined_k141_191337 | [full]   | 3240 | No | NA | 0 | 0 | Not-determined | Genome-fragment | NA | 0    | 0 |
| S11-final-viral-combined_k141_150758 | [full]   | 1550 | No | NA | 0 | 2 | Not-determined | Genome-fragment | NA | 0    | 0 |
| S8-final-viral-combined_k141_204066  | [full]   | 1186 | No | NA | 0 | 0 | Low-quality    | Genome-fragment | NA | 2.34 | 0 |
| S11-final-viral-combined_k141_294583 | [full]   | 1187 | No | NA | 1 | 0 | Low-quality    | Genome-fragment | NA | 2.99 | 0 |
| S11-final-viral-combined_k141_219258 | [full]   | 1344 | No | NA | 0 | 1 | Not-determined | Genome-fragment | NA | 0    | 0 |
| S11-final-viral-combined_k141_215820 | [full]   | 1640 | No | NA | 0 | 2 | Not-determined | Genome-fragment | NA | 0    | 0 |
| S11-final-viral-combined_k141_191435 | [H2gene] | 1187 | No | NA | 0 | 0 | Low-quality    |                 |    |      |   |



|                                              |       |     |     |   |   |                |                 |      |       |
|----------------------------------------------|-------|-----|-----|---|---|----------------|-----------------|------|-------|
| S4-final-viral-combined_k141_95728  H2gene   | 1189  | No  | NA  | 1 | 0 | Low-quality    | Genome-fragment | 1.64 | 0     |
| S4-final-viral-combined_k141_92009  H2gene   | 1189  | No  | NA  | 0 | 0 | Low-quality    | Genome-fragment | 2.5  | 0     |
| S11-final-viral-combined_k141_233842  Full   | 2020  | No  | NA  | 0 | 2 | Not-determined | Genome-fragment | NA   | 0     |
| S6_k141_110392                               | 1189  | No  | NA  | 0 | 0 | Low-quality    | Genome-fragment | 1.36 | 0     |
| S11-final-viral-combined_k141_303929  Full   | 1271  | No  | NA  | 0 | 0 | Not-determined | Genome-fragment | NA   | 0     |
| S11-final-viral-combined_k141_324531  Full   | 1190  | No  | NA  | 0 | 0 | Low-quality    | Genome-fragment | 2.33 | 0     |
| S11-final-viral-combined_k141_301938  Full   | 1386  | No  | NA  | 0 | 0 | Not-determined | Genome-fragment | NA   | 0     |
| S11-final-viral-combined_k141_316033  Full   | 2732  | No  | NA  | 0 | 0 | Not-determined | Genome-fragment | NA   | 0     |
| S11_k141_142811                              | 1190  | No  | NA  | 0 | 1 | Low-quality    | Genome-fragment | 1.14 | 0     |
| S11-final-viral-combined_k141_191723  Full   | 3240  | No  | NA  | 0 | 3 | Not-determined | Genome-fragment | NA   | 0     |
| S1-final-viral-combined_k141_287671  Full    | 1190  | No  | NA  | 0 | 2 | Low-quality    | Genome-fragment | 0.64 | 0     |
| S1-final-viral-combined_k141_276655  Full    | 1190  | No  | NA  | 0 | 1 | Low-quality    | Genome-fragment | 0.67 | 0     |
| S11-final-viral-combined_k141_328443  Full   | 1925  | No  | NA  | 0 | 1 | Not-determined | Genome-fragment | NA   | 0     |
| S11-final-viral-combined_k141_233923  Full   | 1017  | No  | NA  | 0 | 1 | Not-determined | Genome-fragment | NA   | 0     |
| S5-final-viral-combined_k141_219866  H2gene  | 1190  | No  | NA  | 1 | 0 | Low-quality    | Genome-fragment | 2.85 | 0     |
| S7-final-viral-combined_k141_200631  Full    | 1190  | No  | NA  | 0 | 1 | Low-quality    | Genome-fragment | 0.7  | 0     |
| S11-final-viral-combined_k141_233930  Full   | 1526  | No  | NA  | 0 | 0 | Not-determined | Genome-fragment | NA   | 0     |
| S12-final-viral-combined_k141_374465  H2gene | 1190  | No  | NA  | 1 | 0 | Low-quality    | Genome-fragment | 0.46 | 0     |
| S2-final-viral-combined_k141_128742  Full    | 1190  | No  | NA  | 1 | 0 | Low-quality    | Genome-fragment | 2.96 | 0     |
| S11-final-viral-combined_k141_68502  Full    | 2346  | No  | NA  | 0 | 0 | Not-determined | Genome-fragment | NA   | 0     |
| S11-final-viral-combined_k141_219866  Full   | 3860  | No  | NA  | 0 | 3 | Not-determined | Genome-fragment | NA   | 0     |
| S11-final-viral-combined_k141_289090  Full   | 1129  | No  | NA  | 0 | 0 | Not-determined | Genome-fragment | NA   | 0     |
| S11-final-viral-combined_k141_191787  Full   | 4495  | No  | NA  | 0 | 1 | Not-determined | Genome-fragment | NA   | 0     |
| S11-final-viral-combined_k141_812711  Full   | 2545  | No  | NA  | 0 | 2 | Not-determined | Genome-fragment | NA   | 0     |
| S11-final-viral-combined_k141_289023  Full   | 1281  | No  | NA  | 0 | 1 | Not-determined | Genome-fragment | NA   | 0     |
| S11-final-viral-combined_k141_121693  Full   | 2054  | No  | NA  | 0 | 2 | Not-determined | Genome-fragment | NA   | 0     |
| S11-final-viral-combined_k141_136444  Full   | 16632 | No  | NA  | 0 | 3 | Not-determined | Genome-fragment | NA   | 0     |
| S2-final-viral-combined_k141_182956  Full    | 1190  | No  | NA  | 0 | 0 | Low-quality    | Genome-fragment | 2.22 | 0     |
| S11-final-viral-combined_k141_234948  Full   | 2217  | No  | NA  | 0 | 1 | Not-determined | Genome-fragment | NA   | 0     |
| S11-final-viral-combined_k141_302027  Full   | 2079  | No  | NA  | 0 | 3 | Not-determined | Genome-fragment | NA   | 0     |
| S11-final-viral-combined_k141_219733  Full   | 1323  | No  | NA  | 0 | 2 | Not-determined | Genome-fragment | NA   | 0     |
| S11-final-viral-combined_k141_350091  Full   | 1996  | No  | NA  | 0 | 3 | Not-determined | Genome-fragment | NA   | 0     |
| S2-final-viral-combined_k141_123516  Full    | 1190  | No  | NA  | 1 | 0 | Low-quality    | Genome-fragment | 2.09 | 0     |
| S2-final-viral-combined_k141_162342  H2gene  | 1190  | No  | NA  | 2 | 0 | Low-quality    | Genome-fragment | 2.47 | 0     |
| S2_k141_200606                               | 1190  | No  | NA  | 0 | 2 | Low-quality    | Genome-fragment | 2.36 | 0     |
| S11-final-viral-combined_k141_68527  Full    | 2390  | No  | NA  | 0 | 3 | Not-determined | Genome-fragment | NA   | 0     |
| S8_k141_186645                               | 1190  | No  | NA  | 0 | 0 | Low-quality    | Genome-fragment | 0.95 | 0     |
| S8_k141_211098                               | 1190  | No  | NA  | 0 | 0 | Low-quality    | Genome-fragment | 1.72 | 0     |
| S9_k141_100062                               | 1191  | No  | NA  | 0 | 1 | Low-quality    | Genome-fragment | 1.45 | 0     |
| S11-final-viral-combined_k141_194006  Full   | 1191  | No  | NA  | 1 | 0 | Low-quality    | Genome-fragment | 1.33 | 0     |
| S11-final-viral-combined_k141_201811  Full   | 1191  | No  | NA  | 0 | 1 | Low-quality    | Genome-fragment | 0.71 | 0     |
| S11-final-viral-combined_k141_261761  Full   | 1472  | No  | NA  | 0 | 2 | Not-determined | Genome-fragment | NA   | 0     |
| S11-final-viral-combined_k141_151165  Full   | 9167  | No  | NA  | 0 | 6 | Not-determined | Genome-fragment | NA   | 0     |
| S11-final-viral-combined_k141_274574  Full   | 1220  | No  | NA  | 0 | 0 | Not-determined | Genome-fragment | NA   | 0     |
| S1-final-viral-combined_k141_200911  H2gene  | 1191  | No  | NA  | 0 | 0 | Low-quality    | Genome-fragment | 2.54 | 0     |
| S11-final-viral-combined_k141_328561  Full   | 4168  | No  | NA  | 0 | 1 | Not-determined | Genome-fragment | NA   | 0     |
| S11-final-viral-combined_k141_350077  Full   | 1706  | No  | NA  | 0 | 0 | Not-determined | Genome-fragment | NA   | 0     |
| S11-final-viral-combined_k141_274602  Full   | 1562  | No  | NA  | 0 | 1 | Not-determined | Genome-fragment | NA   | 0     |
| S11-final-viral-combined_k141_274604  Full   | 1978  | No  | NA  | 0 | 0 | Not-determined | Genome-fragment | NA   | 0     |
| S1_k141_301193                               | 1191  | No  | NA  | 0 | 1 | Low-quality    | Genome-fragment | 0.29 | 0     |
| S11-final-viral-combined_k141_178953  Full   | 6371  | No  | NA  | 0 | 2 | Not-determined | Genome-fragment | NA   | 0     |
| S11-final-viral-combined_k141_219811  Full   | 2467  | No  | NA  | 0 | 0 | Not-determined | Genome-fragment | NA   | 0     |
| S11-final-viral-combined_k141_136561  Full   | 3583  | No  | NA  | 0 | 2 | Not-determined | Genome-fragment | NA   | 0     |
| S11-final-viral-combined_k141_205702  Full   | 1178  | No  | NA  | 0 | 0 | Not-determined | Genome-fragment | NA   | 0     |
| S2_k141_124910                               | 1191  | No  | NA  | 0 | 0 | Low-quality    | Genome-fragment | 2.22 | 0     |
| S5-final-viral-combined_k141_146839  Full    | 1191  | No  | NA  | 0 | 0 | Low-quality    | Genome-fragment | 3.47 | 0     |
| S5_k141_88083                                | 1191  | No  | NA  | 0 | 0 | Low-quality    | Genome-fragment | 2.48 | 0     |
| S11-final-viral-combined_k141_208801  Full   | 2033  | No  | NA  | 0 | 0 | Not-determined | Genome-fragment | NA   | 0     |
| S11-final-viral-combined_k141_155242  Full   | 3679  | No  | NA  | 0 | 4 | Not-determined | Genome-fragment | NA   | 0     |
| S11-final-viral-combined_k141_95855  Full    | 2712  | No  | NA  | 0 | 0 | Not-determined | Genome-fragment | NA   | 0     |
| S12_k141_4486                                | 1191  | No  | NA  | 1 | 0 | Low-quality    | Genome-fragment | 3.29 | 0     |
| S4-final-viral-combined_k141_78182  Full     | 1191  | No  | NA  | 0 | 0 | Low-quality    | Genome-fragment | 1.45 | 0     |
| S4_k141_36250                                | 1191  | No  | NA  | 0 | 0 | Low-quality    | Genome-fragment | 1.19 | 0     |
| S6-final-viral-combined_k141_139116  H2gene  | 1191  | No  | NA  | 1 | 0 | Low-quality    | Genome-fragment | 2.16 | 0     |
| S11-final-viral-combined_k141_136596  Full   | 5533  | No  | NA  | 0 | 1 | Not-determined | Genome-fragment | NA   | 0     |
| S8-final-viral-combined_k141_131304  Full    | 1191  | No  | NA  | 0 | 1 | Low-quality    | Genome-fragment | 0.64 | 0     |
| S11-final-viral-combined_k141_289191  Full   | 5275  | No  | NA  | 0 | 3 | Not-determined | Genome-fragment | NA   | 0     |
| S8-final-viral-combined_k141_145126  Full    | 1191  | No  | NA  | 0 | 0 | Low-quality    | Genome-fragment | 1.6  | 0     |
| S9-final-viral-combined_k141_74074  H2gene   | 1192  | No  | NA  | 0 | 1 | Low-quality    | Genome-fragment | 3.3  | 0     |
| S11-final-viral-combined_k141_165226  Full   | 2058  | No  | NA  | 0 | 2 | Not-determined | Genome-fragment | NA   | 0     |
| S9_k141_58903                                | 1192  | No  | NA  | 0 | 0 | Low-quality    | Genome-fragment | 1.22 | 0     |
| S11-final-viral-combined_k141_25941  Full    | 3404  | No  | NA  | 0 | 1 | Not-determined | Genome-fragment | NA   | 0     |
| S11-final-viral-combined_k141_98316  H2gene  | 1192  | No  | NA  | 1 | 0 | Low-quality    | Genome-fragment | 3.1  | 0     |
| S11-final-viral-combined_k141_136615  Full   | 5494  | No  | NA  | 0 | 4 | Not-determined | Genome-fragment | NA   | 0     |
| S11-final-viral-combined_k141_136615  Full   | 1900  | No  | NA  | 0 | 3 | Not-determined | Genome-fragment | NA   | 0     |
| S11-final-viral-combined_k141_328682  Full   | 6458  | No  | NA  | 0 | 5 | Not-determined | Genome-fragment | NA   | 0     |
| S11-final-viral-combined_k141_141716  Full   | 1192  | Yes | 384 | 1 | 1 | Low-quality    | Genome-fragment | 0.71 | 67.79 |
| S11-final-viral-combined_k141_328693  Full   | 1128  | No  | NA  | 0 | 1 | Not-determined | Genome-fragment | NA   | 0     |
| S5-final-viral-combined_k141_125161  Full    | 1192  | No  | NA  | 0 | 0 | Low-quality    | Genome-fragment | 2.56 | 0     |
| S11-final-viral-combined_k141_179090  Full   | 2107  | No  | NA  | 0 | 2 | Not-determined | Genome-fragment | NA   | 0     |
| S12-final-viral-combined_k141_103187  H2gene | 1192  | No  | NA  | 1 | 0 | Low-quality    | Genome-fragment | 0.77 | 0     |
| S6-final-viral-combined_k141_172071  H2gene  | 1192  | No  | NA  | 0 | 0 | Low-quality    | Genome-fragment | 2.47 | 0     |
| S9-final-viral-combined_k141_102627  Full    | 1193  | No  | NA  | 2 | 0 | Low-quality    | Genome-fragment | 1.93 | 0     |
| S11-final-viral-combined_k141_294678  H2gene | 1193  | No  | NA  | 1 | 0 | Low-quality    | Genome-fragment | 3.34 | 0     |
| S1-final-viral-combined_k141_65482  Full     | 1193  | No  | NA  | 0 | 0 | Low-quality    | Genome-fragment | 1.8  | 0     |
| S7-final-viral-combined_k141_175465  Full    | 1193  | No  | NA  | 0 | 0 | Low-quality    | Genome-fragment | 2.35 | 0     |
| S11-final-viral-combined_k141_260141  Full   | 1423  | No  | NA  | 0 | 0 | Not-determined | Genome-fragment | NA   | 0     |
| S11-final-viral-combined_k141_193955  Full   | 2430  | No  | NA  | 0 | 2 | Not-determined | Genome-fragment | NA   | 0     |
| S11-final-viral-combined_k141_81581  Full    | 1993  | No  | NA  | 0 | 0 | Not-determined | Genome-fragment | NA   | 0     |
| S7-final-viral-combined_k141_198945  Full    | 1193  | No  | NA  | 0 | 0 | Low-quality    | Genome-fragment | 2.06 | 0     |
| S7_k141_51282                                | 1193  | No  | NA  | 0 | 1 | Low-quality    | Genome-fragment | 0.52 | 0     |
| S12-final-viral-combined_k141_258059  Full   | 1193  | No  | NA  | 1 | 0 | Low-quality    | Genome-fragment | 2.81 | 0     |
| S12-final-viral-combined_k141_275929  Full   | 1193  | No  | NA  | 0 | 0 | Low-quality    | Genome-fragment | 0.86 | 0     |
| S12-final-viral-combined_k141_136782  H2gene | 1193  | No  | NA  | 1 | 0 | Low-quality    | Genome-fragment | 1.19 | 0     |
| S11-final-viral-combined_k141_136782  Full   | 3205  | No  | NA  | 0 | 0 | Not-determined | Genome-fragment | NA   | 0     |
| S8-final-viral-combined_k141_217599  Full    | 1193  | No  | NA  | 0 | 1 | Low-quality    | Genome-fragment | 2.02 | 0     |
| S9-final-viral-combined_k141_101861  Full    | 1194  | No  | NA  | 0 | 0 | Low-quality    | Genome-fragment | 2.86 | 0     |
| S11-final-viral-combined_k141_26097  Full    | 1608  | No  | NA  | 0 | 2 | Not-determined | Genome-fragment | NA   | 0     |
| S11-final-viral-combined_k141_137611  Full   | 2478  | No  | NA  | 0 | 1 | Not-determined | Genome-fragment | NA   | 0     |
| S9_k141_82087                                | 1194  | No  | NA  | 0 | 0 | Low-quality    | Genome-fragment | 2.88 | 0     |
| S11-final-viral-combined_k141_124687  Full   | 1194  | No  | NA  | 0 | 0 | Low-quality    | Genome-fragment | 0.32 | 0     |
| S11-final-viral-combined_k141_81466  Full    | 2558  | No  | NA  | 0 | 2 | Not-determined | Genome-fragment | NA   | 0     |
| S11-final-viral-combined_k141_136345  Full   | 1194  | No  | NA  | 0 | 1 | Low-quality    | Genome-fragment | 0.85 | 0     |
| S11-final-viral-combined_k141_136796  Full   | 2167  | No  | NA  | 0 | 0 | Not-determined | Genome-fragment | NA   | 0     |
| S1-final-viral-combined_k141_176909  Full    | 1194  | No  | NA  | 0 | 0 | Low-quality    | Genome-fragment | 0.77 | 0     |
| S1-final-viral-combined_k141_201161  H2gene  | 1194  | No  | NA  | 2 | 0 | Low-quality    | Genome-fragment | 2.57 | 0     |
| S11-final-viral-combined_k141_302484  Full   | 1306  | No  | NA  | 0 | 0 | Not-determined | Genome-fragment | NA   | 0     |
| S1_k141_58778                                | 1194  | No  | NA  | 0 | 1 | Low-quality    | Genome-fragment | 2.44 | 0     |
| S5-final-viral-combined_k141_106260  Full    | 1194  | No  | NA  | 0 | 0 | Low-quality    | Genome-fragment | 1.89 | 0     |
| S11-final-viral-combined_k141_328798  Full   | 2610  | No  | NA  | 0 | 0 | Not-determined | Genome-fragment | NA   | 0     |
| S17-final-viral-combined_k141_78993  H2gene  | 1194  | No  | NA  | 1 | 0 | Low-quality    | Genome-fragment | 0.74 | 0     |
| S12_k141_300859                              | 1194  | No  | NA  | 0 | 0 | Low-quality    | Genome-fragment | 2.81 | 0     |
| S2-final-viral-combined_k141_244388  Full    | 1194  | No  | NA  | 0 | 1 | Low-quality    | Genome-fragment | 2.85 | 0     |
| S2-final-viral-combined_k141_7392  Full      | 1194  | No  | NA  | 1 | 0 | Low-quality    | Genome-fragment | 2.57 | 0     |
| S11-final-viral-combined_k141_328840  Full   | 4511  | No  | NA  | 0 | 2 | Not-determined | Genome-fragment | NA   | 0     |
| S4_k141_13000                                | 1194  | No  | NA  | 2 | 0 | Low-quality    | Genome-fragment | 1.91 | 0     |
| S11-final-viral-combined_k141_151446  Full   | 2083  | No  | NA  | 0 | 3 | Not-determined | Genome-fragment | NA   | 0     |
| S11-final-viral-combined_k141_302584  Full   | 1106  | No  | NA  | 0 | 0 | Not-determined | Genome-fragment | NA   | 0     |
| S8_k141_50788                                | 1194  | No  | NA  | 0 | 0 | Low-quality    | Genome-fragment | 1.55 | 0     |
| S11-final-viral-combined_k141_151488  Full   | 1018  | No  | NA  | 0 | 1 | Not-determined | Genome-fragment | NA   | 0     |
| S11-final-viral-combined_k141_136951  Full   | 1692  | No  | NA  | 0 | 2 | Not-determined | Genome-fragment | NA   | 0     |
| S9_k141_123755                               | 1195  | No  | NA  | 0 | 0 | Low-quality    | Genome-fragment | 0.37 | 0     |
| S11-final-viral-combined_k141_275068  Full   | 2749  | No  | NA  | 0 | 3 | Not-determined | Genome-fragment | NA   | 0     |
| S9_k141_119413                               | 1195  | No  | NA  | 0 | 0 | Low-quality    | Genome-fragment | 2.4  | 0     |
| S11-final-viral-combined_k141_207825  Full   | 1195  | No  | NA  | 1 | 0 | Low-quality    | Genome-fragment | 2.26 | 0     |
| S11_k141_253537                              | 1195  | No  | NA  | 0 | 0 | Low-quality    | Genome-fragment | 1.81 | 0     |
| S11-final-viral-combined_k141_81877  Full    | 4097  | No  | NA  | 0 | 3 | Not-determined | Genome-fragment | NA   | 0     |
| S11-final-viral-combined_k141_688761  Full   | 2190  | No  | NA  | 0 | 3 | Not-determined | Genome-fragment | NA   | 0     |
| S11-final-viral-combined_k141_123287  Full   | 2795  | No  | NA  | 0 | 0 | Not-determined | Genome-fragment | NA   | 0     |
| S11-final-viral-combined_k141_137033  Full   | 6213  | No  | NA  | 0 | 7 | Not-determined | Genome-fragment | NA   | 0     |
| S1_k141_364305                               | 1195  | No  | NA  | 0 | 1 | Low-quality    | Genome-fragment | 0.95 | 0     |
| S11-final-viral-combined_k141_137044  Full   | 1053  | No  | NA  | 0 | 0 | Not-determined | Genome-fragment | NA   | 0     |
| S11-final-viral-combined_k141_819161  Full   | 2634  | No  | NA  | 0 | 2 | Not-determined | Genome-fragment | NA   | 0     |
| S5-final-viral-combined_k141_53851  H2gene   | 1195  | No  | NA  | 0 | 0 | Low-quality    | Genome-fragment | 2.47 | 0     |
| S7-final-viral-combined_k141_138421  Full    | 1195  | No  | NA  | 0 | 1 | Low-quality    | Genome-fragment | 1.27 | 0     |
| S11-final-viral-combined_k141_1              |       |     |     |   |   |                |                 |      |       |



|                                      |             |       |    |    |   |    |                |                 |    |      |   |
|--------------------------------------|-------------|-------|----|----|---|----|----------------|-----------------|----|------|---|
| S11-final-viral-combined_k141_303066 | [full]      | 2255  | No | NA | 0 | 3  | Not-determined | Genome-fragment | NA | 2.97 | 0 |
| S12_k141_302016                      |             | 1196  | No | NA | 1 | 0  | Low-quality    | Genome-fragment | NA | 2.45 | 0 |
| S2-final-viral-combined_k141_57049   | [full]      | 1196  | No | NA | 0 | 1  | Low-quality    | Genome-fragment | NA | 2.45 | 0 |
| S11-final-viral-combined_k141_137498 | [full]      | 4177  | No | NA | 0 | 1  | Not-determined | Genome-fragment | NA | 1.46 | 0 |
| S2-final-viral-combined_k141_196488  | [full]      | 1196  | No | NA | 0 | 0  | Low-quality    | Genome-fragment | NA | 1.46 | 0 |
| S11-final-viral-combined_k141_137500 | [full]      | 2402  | No | NA | 0 | 1  | Not-determined | Genome-fragment | NA | 0    | 0 |
| S11-final-viral-combined_k141_192708 | [full]      | 1096  | No | NA | 0 | 1  | Not-determined | Genome-fragment | NA | 0    | 0 |
| S11-final-viral-combined_k141_137547 | [full]      | 1126  | No | NA | 0 | 1  | Not-determined | Genome-fragment | NA | 2.83 | 0 |
| S2-final-viral-combined_k141_127321  | [H2gene]    | 1196  | No | NA | 1 | 0  | Low-quality    | Genome-fragment | NA | 2.83 | 0 |
| S11-final-viral-combined_k141_329193 | [full]      | 2169  | No | NA | 1 | 0  | Not-determined | Genome-fragment | NA | 0    | 0 |
| S11-final-viral-combined_k141_82361  | [full]      | 14273 | No | NA | 0 | 12 | Not-determined | Genome-fragment | NA | 0    | 0 |
| S11-final-viral-combined_k141_21680  | [full]      | 2304  | No | NA | 0 | 2  | Not-determined | Genome-fragment | NA | 0    | 0 |
| S11-final-viral-combined_k141_192773 | [full]      | 5206  | No | NA | 0 | 2  | Not-determined | Genome-fragment | NA | 0    | 0 |
| S8-final-viral-combined_k141_115793  | [full]      | 1196  | No | NA | 0 | 0  | Low-quality    | Genome-fragment | NA | 1    | 0 |
| S11-final-viral-combined_k141_206350 | [full]      | 12767 | No | NA | 0 | 8  | Not-determined | Genome-fragment | NA | 0    | 0 |
| S11-final-viral-combined_k141_275251 | [full]      | 11803 | No | NA | 0 | 2  | Not-determined | Genome-fragment | NA | 0    | 0 |
| S11-final-viral-combined_k141_329260 | [full]      | 9328  | No | NA | 0 | 3  | Not-determined | Genome-fragment | NA | 0    | 0 |
| S8-final-viral-combined_k141_87995   | [full]      | 1196  | No | NA | 0 | 1  | Low-quality    | Genome-fragment | NA | 2.27 | 0 |
| S11-final-viral-combined_k141_26931  | [full]      | 1042  | No | NA | 1 | 0  | Not-determined | Genome-fragment | NA | 0    | 0 |
| S11-final-viral-combined_k141_26956  | [full]      | 1366  | No | NA | 0 | 0  | Not-determined | Genome-fragment | NA | 0    | 0 |
| S8-final-viral-combined_k141_67175   | [full]      | 1196  | No | NA | 0 | 2  | Low-quality    | Genome-fragment | NA | 2.75 | 0 |
| S11-final-viral-combined_k141_206462 | [full]      | 2926  | No | NA | 0 | 2  | Not-determined | Genome-fragment | NA | 0    | 0 |
| S11-final-viral-combined_k141_329343 | [full]      | 1303  | No | NA | 0 | 1  | Not-determined | Genome-fragment | NA | 0    | 0 |
| S9-final-viral-combined_k141_100194  | [full]      | 1197  | No | NA | 1 | 0  | Low-quality    | Genome-fragment | NA | 2.69 | 0 |
| S11-final-viral-combined_k141_239421 | [full]      | 2051  | No | NA | 0 | 3  | Not-determined | Genome-fragment | NA | 1.79 | 0 |
| S9-final-viral-combined_k141_18565   | [H2gene]    | 1197  | No | NA | 1 | 0  | Low-quality    | Genome-fragment | NA | 0.71 | 0 |
| S11_k141_295013                      |             | 1197  | No | NA | 0 | 2  | Low-quality    | Genome-fragment | NA | 0.71 | 0 |
| S11-final-viral-combined_k141_27115  | [full]      | 1681  | No | NA | 0 | 1  | Not-determined | Genome-fragment | NA | 0    | 0 |
| S11-final-viral-combined_k141_206821 | [full]      | 2551  | No | NA | 0 | 0  | Not-determined | Genome-fragment | NA | 0    | 0 |
| S11-final-viral-combined_k141_27141  | [full]      | 3494  | No | NA | 0 | 4  | Not-determined | Genome-fragment | NA | 0    | 0 |
| S11-final-viral-combined_k141_329493 | [full]      | 15811 | No | NA | 1 | 29 | High-quality   | High-quality    | NA | 100  | 0 |
| S1_k141_107624                       |             | 1197  | No | NA | 0 | 0  | Low-quality    | Genome-fragment | NA | 3.07 | 0 |
| S11-final-viral-combined_k141_329522 | [full]      | 7380  | No | NA | 0 | 6  | Not-determined | Genome-fragment | NA | 0    | 0 |
| S11-final-viral-combined_k141_27202  | [full]      | 1973  | No | NA | 0 | 2  | Not-determined | Genome-fragment | NA | 0    | 0 |
| S11-final-viral-combined_k141_27219  | [full]      | 3045  | No | NA | 0 | 1  | Not-determined | Genome-fragment | NA | 0    | 0 |
| S11-final-viral-combined_k141_27281  | [full]      | 2612  | No | NA | 0 | 0  | Not-determined | Genome-fragment | NA | 0.78 | 0 |
| S1_k141_193419                       |             | 1197  | No | NA | 0 | 1  | Low-quality    | Genome-fragment | NA | 0.67 | 0 |
| S11-final-viral-combined_k141_329809 | [full]      | 1281  | No | NA | 0 | 0  | Not-determined | Genome-fragment | NA | 0    | 0 |
| S11-final-viral-combined_k141_329864 | [full]      | 3918  | No | NA | 0 | 2  | Not-determined | Genome-fragment | NA | 2.11 | 0 |
| S3-final-viral-combined_k141_22812   | [H2gene]    | 1197  | No | NA | 0 | 0  | Low-quality    | Genome-fragment | NA | 2.11 | 0 |
| S11-final-viral-combined_k141_330012 | [full]      | 1157  | No | NA | 0 | 1  | Not-determined | Genome-fragment | NA | 0    | 0 |
| S11-final-viral-combined_k141_330101 | [full]      | 1613  | No | NA | 0 | 1  | Not-determined | Genome-fragment | NA | 0    | 0 |
| S11-final-viral-combined_k141_330252 | [full]      | 6534  | No | NA | 0 | 0  | Not-determined | Genome-fragment | NA | 0    | 0 |
| S11-final-viral-combined_k141_330345 | [full]      | 1780  | No | NA | 0 | 2  | Not-determined | Genome-fragment | NA | 0    | 0 |
| S11-final-viral-combined_k141_330368 | [full]      | 4243  | No | NA | 0 | 1  | Not-determined | Genome-fragment | NA | 0    | 0 |
| S3_k141_330395                       |             | 1197  | No | NA | 0 | 0  | Low-quality    | Genome-fragment | NA | 1.57 | 0 |
| S11-final-viral-combined_k141_124528 | [O_partial] | 12304 | No | NA | 0 | 4  | Not-determined | Genome-fragment | NA | 0    | 0 |
| S11-final-viral-combined_k141_36978  | [O_partial] | 10688 | No | NA | 0 | 12 | Not-determined | Genome-fragment | NA | 0.55 | 0 |
| S5_k141_124419                       |             | 1197  | No | NA | 0 | 0  | Low-quality    | Genome-fragment | NA | 0.55 | 0 |
| S11-final-viral-combined_k141_248668 | [O_partial] | 10925 | No | NA | 0 | 6  | Not-determined | Genome-fragment | NA | 2.11 | 0 |
| S5-final-viral-combined_k141_21394   | [full]      | 1197  | No | NA | 0 | 1  | Low-quality    | Genome-fragment | NA | 2.11 | 0 |
| S11-final-viral-combined_k141_236040 | [O_partial] | 22654 | No | NA | 0 | 16 | Not-determined | Genome-fragment | NA | 0.46 | 0 |
| S17-final-viral-combined_k141_167568 | [full]      | 1197  | No | NA | 0 | 2  | Low-quality    | Genome-fragment | NA | 0.46 | 0 |
| S11-final-viral-combined_k141_153467 | [O_partial] | 25484 | No | NA | 0 | 15 | Not-determined | Genome-fragment | NA | 0.78 | 0 |
| S17-final-viral-combined_k141_108127 | [full]      | 1197  | No | NA | 0 | 0  | Low-quality    | Genome-fragment | NA | 2.72 | 0 |
| S12-final-viral-combined_k141_271871 | [full]      | 1197  | No | NA | 0 | 0  | Low-quality    | Genome-fragment | NA | 0.65 | 0 |
| S12_k141_87408                       |             | 1197  | No | NA | 0 | 0  | Low-quality    | Genome-fragment | NA | 2.05 | 0 |
| S12_k141_144612                      |             | 1197  | No | NA | 0 | 0  | Low-quality    | Genome-fragment | NA | 1.57 | 0 |
| S2-final-viral-combined_k141_104938  | [H2gene]    | 1197  | No | NA | 0 | 0  | Low-quality    | Genome-fragment | NA | 2.77 | 0 |
| S6-final-viral-combined_k141_78058   | [full]      | 1197  | No | NA | 0 | 0  | Low-quality    | Genome-fragment | NA | 0.78 | 0 |
| S8-final-viral-combined_k141_231507  | [full]      | 1197  | No | NA | 0 | 1  | Low-quality    | Genome-fragment | NA | 2.77 | 0 |
| S8-final-viral-combined_k141_212425  | [full]      | 1197  | No | NA | 0 | 0  | Low-quality    | Genome-fragment | NA | 1.91 | 0 |
| S8_k141_87954                        |             | 1197  | No | NA | 1 | 0  | Low-quality    | Genome-fragment | NA | 2.8  | 0 |
| S9-final-viral-combined_k141_76842   | [full]      | 1198  | No | NA | 0 | 0  | Low-quality    | Genome-fragment | NA | 0.35 | 0 |
| S11-final-viral-combined_k141_18138  | [O_partial] | 16364 | No | NA | 0 | 0  | Not-determined | Genome-fragment | NA | 1.8  | 0 |
| S9-final-viral-combined_k141_89724   | [full]      | 1198  | No | NA | 0 | 0  | Low-quality    | Genome-fragment | NA | 2.12 | 0 |
| S11-final-viral-combined_k141_36901  | [full]      | 1198  | No | NA | 0 | 0  | Low-quality    | Genome-fragment | NA | 1.64 | 0 |
| S11_k141_191183                      |             | 1198  | No | NA | 0 | 0  | Low-quality    | Genome-fragment | NA | 2.05 | 0 |
| S11-final-viral-combined_k141_129668 | [O_partial] | 15245 | No | NA | 0 | 11 | Not-determined | Genome-fragment | NA | 0    | 0 |
| S1-final-viral-combined_k141_197635  | [full]      | 1198  | No | NA | 0 | 1  | Low-quality    | Genome-fragment | NA | 0.7  | 0 |
| S14-final-viral-combined_k141_169279 | [full]      | 1198  | No | NA | 0 | 0  | Low-quality    | Genome-fragment | NA | 0.47 | 0 |
| S11-final-viral-combined_k141_47471  | [O_partial] | 30910 | No | NA | 0 | 17 | Not-determined | Genome-fragment | NA | 0    | 0 |
| S11-final-viral-combined_k141_199102 | [O_partial] | 21178 | No | NA | 0 | 1  | Low-quality    | Genome-fragment | NA | 0.7  | 0 |
| S14-final-viral-combined_k141_289473 | [full]      | 1198  | No | NA | 0 | 7  | Not-determined | Genome-fragment | NA | 0.47 | 0 |
| S11-final-viral-combined_k141_28123  | [O_partial] | 1196  | No | NA | 0 | 1  | Low-quality    | Genome-fragment | NA | 0.47 | 0 |
| S12-final-viral-combined_k141_325590 | [full]      | 1198  | No | NA | 0 | 8  | Not-determined | Genome-fragment | NA | 2.76 | 0 |
| S11-final-viral-combined_k141_200131 | [O_partial] | 13297 | No | NA | 0 | 9  | Not-determined | Genome-fragment | NA | 2.76 | 0 |
| S11-final-viral-combined_k141_242954 | [O_partial] | 15557 | No | NA | 0 | 0  | Low-quality    | Genome-fragment | NA | 1.63 | 0 |
| S12_k141_137877                      |             | 1198  | No | NA | 0 | 3  | Not-determined | Genome-fragment | NA | 1.63 | 0 |
| S11-final-viral-combined_k141_146499 | [O_partial] | 10736 | No | NA | 0 | 1  | Low-quality    | Genome-fragment | NA | 2.71 | 0 |
| S2-final-viral-combined_k141_155138  | [full]      | 1198  | No | NA | 0 | 0  | Low-quality    | Genome-fragment | NA | 2.36 | 0 |
| S6_k141_118051                       |             | 1198  | No | NA | 0 | 0  | Low-quality    | Genome-fragment | NA | 2.12 | 0 |
| S8-final-viral-combined_k141_179335  | [full]      | 1198  | No | NA | 1 | 0  | Low-quality    | Genome-fragment | NA | 0.9  | 0 |
| S11-final-viral-combined_k141_4559   | [full]      | 1199  | No | NA | 0 | 0  | Low-quality    | Genome-fragment | NA | 2.66 | 0 |
| S11-final-viral-combined_k141_315109 | [full]      | 1199  | No | NA | 0 | 0  | Low-quality    | Genome-fragment | NA | 3.2  | 0 |
| S11-final-viral-combined_k141_161582 | [full]      | 1199  | No | NA | 0 | 0  | Low-quality    | Genome-fragment | NA | 1.44 | 0 |
| S11_k141_22994                       |             | 1199  | No | NA | 0 | 0  | Low-quality    | Genome-fragment | NA | 0    | 0 |
| S2-final-viral-combined_k141_134480  | [full]      | 1199  | No | NA | 0 | 0  | Low-quality    | Genome-fragment | NA | 2.79 | 0 |
| S11-final-viral-combined_k141_275441 | [O_partial] | 1197  | No | NA | 0 | 0  | Not-determined | Genome-fragment | NA | 0.6  | 0 |
| S1-final-viral-combined_k141_173800  | [full]      | 1199  | No | NA | 3 | 0  | Low-quality    | Genome-fragment | NA | 2.6  | 0 |
| S1_k141_15332                        |             | 1199  | No | NA | 2 | 0  | Low-quality    | Genome-fragment | NA | 0.75 | 0 |
| S11-final-viral-combined_k141_234401 | [H2gene]    | 1243  | No | NA | 0 | 0  | Not-determined | Genome-fragment | NA | 2.2  | 0 |
| S11-final-viral-combined_k141_55559  | [H2gene]    | 1106  | No | NA | 0 | 0  | Not-determined | Genome-fragment | NA | 31.1 | 0 |
| S17-final-viral-combined_k141_206889 | [H2gene]    | 1199  | No | NA | 1 | 0  | Low-quality    | Genome-fragment | NA | 0.45 | 0 |
| S17_k141_11545                       |             | 1199  | No | NA | 0 | 0  | Low-quality    | Genome-fragment | NA | 2.59 | 0 |
| S2-final-viral-combined_k141_91251   | [full]      | 1199  | No | NA | 0 | 0  | Low-quality    | Genome-fragment | NA | 0    | 0 |
| S11-final-viral-combined_k141_317354 | [H2gene]    | 1102  | No | NA | 0 | 0  | Not-determined | Genome-fragment | NA | 2.79 | 0 |
| S11-final-viral-combined_k141_152129 | [H2gene]    | 1111  | No | NA | 0 | 0  | Low-quality    | Genome-fragment | NA | 0.6  | 0 |
| S4-final-viral-combined_k141_17548   | [full]      | 1199  | No | NA | 0 | 2  | Low-quality    | Genome-fragment | NA | 2.6  | 0 |
| S8_k141_210104                       |             | 1199  | No | NA | 0 | 0  | Low-quality    | Genome-fragment | NA | 0.75 | 0 |
| S9-final-viral-combined_k141_32219   | [full]      | 1200  | No | NA | 3 | 0  | Low-quality    | Genome-fragment | NA | 2.2  | 0 |
| S11-final-viral-combined_k141_780241 | [full]      | 1200  | No | NA | 0 | 0  | Low-quality    | Genome-fragment | NA | 2.23 | 0 |
| S11-final-viral-combined_k141_162482 | [full]      | 1200  | No | NA | 1 | 0  | Low-quality    | Genome-fragment | NA | 2.34 | 0 |
| S11-final-viral-combined_k141_110829 | [H2gene]    | 1730  | No | NA | 0 | 0  | Not-determined | Genome-fragment | NA | 0.8  | 0 |
| S11-final-viral-combined_k141_166760 | [H2gene]    | 1091  | No | NA | 0 | 0  | Not-determined | Genome-fragment | NA | 0.75 | 0 |
| S5-final-viral-combined_k141_49840   | [full]      | 1200  | No | NA | 1 | 0  | Low-quality    | Genome-fragment | NA | 2.44 | 0 |
| S11-final-viral-combined_k141_166357 | [H2gene]    | 1285  | No | NA | 0 | 0  | Not-determined | Genome-fragment | NA | 0.97 | 0 |
| S11-final-viral-combined_k141_179840 | [H2gene]    | 1264  | No | NA | 0 | 0  | Not-determined | Genome-fragment | NA | 0.8  | 0 |
| S7_k141_231767                       |             | 1200  | No | NA | 0 | 0  | Low-quality    | Genome-fragment | NA | 0.75 | 0 |
| S11-final-viral-combined_k141_262751 | [H2gene]    | 1425  | No | NA | 0 | 0  | Not-determined | Genome-fragment | NA | 2.78 | 0 |
| S11-final-viral-combined_k141_42167  | [H2gene]    | 1013  | No | NA | 0 | 1  | Not-determined | Genome-fragment | NA | 2.23 | 0 |
| S11-final-viral-combined_k141_262805 | [H2gene]    | 442   | No | NA | 0 | 0  | Not-determined | Genome-fragment | NA | 2.23 | 0 |
| S17-final-viral-combined_k141_121124 | [full]      | 1200  | No | NA | 1 | 0  | Low-quality    | Genome-fragment | NA | 2.23 | 0 |
| S17_k141_253435                      |             | 1200  | No | NA | 1 | 0  | Low-quality    | Genome-fragment | NA | 2.23 | 0 |
| S8-final-viral-combined_k141_252521  | [full]      | 1200  | No | NA | 0 | 0  | Low-quality    | Genome-fragment | NA | 2.34 | 0 |
| S9-final-viral-combined_k141_104994  | [full]      | 1201  | No | NA | 0 | 0  | Low-quality    | Genome-fragment | NA | 3.02 | 0 |
| S11-final-viral-combined_k141_30592  | [full]      | 1201  | No | NA | 0 | 1  | Low-quality    | Genome-fragment | NA | 2.24 | 0 |
| S11-final-viral-combined_k141_20340  | [H2gene]    | 1201  | No | NA | 1 | 0  | Low-quality    | Genome-fragment | NA | 0.69 | 0 |
| S11-final-viral-combined_k141_70145  | [H2gene]    | 1122  | No | NA | 0 | 0  | Not-determined | Genome-fragment | NA | 2.14 | 0 |
| S11-final-viral-combined_k141_323914 | [H2gene]    | 1201  | No | NA | 2 | 0  | Low-quality    | Genome-fragment | NA | 3.74 | 0 |
| S3-final-viral-combined_k141_30235   | [H2gene]    | 1201  | No | NA | 1 | 0  | Low-quality    | Genome          |    |      |   |



|                                             |      |    |    |   |   |                  |                 |      |   |
|---------------------------------------------|------|----|----|---|---|------------------|-----------------|------|---|
| S1-final-viral-combined_k141_343573 full    | 1204 | No | NA | 0 | 1 | Low-quality      | Genome-fragment | 1.64 | 0 |
| S1_k141_153504                              | 1204 | No | NA | 0 | 2 | Low-quality      | Genome-fragment | 3.01 | 0 |
| S5-final-viral-combined_k141_60746 H2gene   | 1204 | No | NA | 1 | 0 | Low-quality      | Genome-fragment | 1.96 | 0 |
| S11-final-viral-combined_k141_267134 H2gene | 2447 | No | NA | 0 | 1 | Not-determined   | Genome-fragment | NA   | 0 |
| S11-final-viral-combined_k141_253375 H2gene | 2268 | No | NA | 0 | 0 | Not-determined   | Genome-fragment | NA   | 0 |
| S5_k141_134041                              | 1204 | No | NA | 0 | 0 | Low-quality      | Genome-fragment | 2.8  | 0 |
| S5_k141_32244                               | 1204 | No | NA | 0 | 1 | Low-quality      | Genome-fragment | 2.02 | 0 |
| S5_k141_42187                               | 1204 | No | NA | 0 | 2 | Low-quality      | Genome-fragment | 2.16 | 0 |
| S7-final-viral-combined_k141_170268 full    | 1204 | No | NA | 1 | 0 | Low-quality      | Genome-fragment | 3.6  | 0 |
| S7_k141_211687                              | 1204 | No | NA | 0 | 1 | Low-quality      | Genome-fragment | 0.32 | 0 |
| S11-final-viral-combined_k141_102591 H2gene | 1241 | No | NA | 0 | 0 | Not-determined   | Genome-fragment | NA   | 0 |
| S17-final-viral-combined_k141_245967 H2gene | 1204 | No | NA | 1 | 0 | Low-quality      | Genome-fragment | 2.21 | 0 |
| S17_k141_10510                              | 1204 | No | NA | 0 | 0 | Low-quality      | Genome-fragment | 1.16 | 0 |
| S11-final-viral-combined_k141_74132 H2gene  | 1171 | No | NA | 0 | 1 | Not-determined   | Genome-fragment | NA   | 0 |
| S11-final-viral-combined_k141_157344 H2gene | 1022 | No | NA | 0 | 0 | Not-determined   | Genome-fragment | NA   | 0 |
| S12-final-viral-combined_k141_50442 full    | 1204 | No | NA | 0 | 0 | Low-quality      | Genome-fragment | 2.06 | 0 |
| S12-final-viral-combined_k141_314578 full   | 1204 | No | NA | 0 | 0 | Low-quality      | Genome-fragment | 2.76 | 0 |
| S12_k141_238449                             | 1204 | No | NA | 0 | 0 | Low-quality      | Genome-fragment | 1.69 | 0 |
| S11-final-viral-combined_k141_309559 H2gene | 2216 | No | NA | 0 | 0 | Not-determined   | Genome-fragment | NA   | 0 |
| S2_k141_40416                               | 1204 | No | NA | 0 | 1 | Low-quality      | Genome-fragment | 0.65 | 0 |
| S11-final-viral-combined_k141_74444 H2gene  | 1628 | No | NA | 0 | 0 | Not-determined   | Genome-fragment | NA   | 0 |
| S8-final-viral-combined_k141_70233 full     | 1204 | No | NA | 0 | 0 | Low-quality      | Genome-fragment | 0.9  | 0 |
| S11-final-viral-combined_k141_295345 H2gene | 1385 | No | NA | 0 | 1 | Not-determined   | Genome-fragment | NA   | 0 |
| S11-final-viral-combined_k141_309868 H2gene | 1267 | No | NA | 0 | 1 | Not-determined   | Genome-fragment | NA   | 0 |
| S11-final-viral-combined_k141_236973 full   | 1205 | No | NA | 1 | 0 | Low-quality      | Genome-fragment | 3.2  | 0 |
| S11-final-viral-combined_k141_100255 full   | 1205 | No | NA | 1 | 0 | Low-quality      | Genome-fragment | 1.86 | 0 |
| S11-final-viral-combined_k141_198511 full   | 1205 | No | NA | 0 | 2 | Low-quality      | Genome-fragment | 0.36 | 0 |
| S11-final-viral-combined_k141_326167 full   | 1205 | No | NA | 1 | 0 | Low-quality      | Genome-fragment | 2.55 | 0 |
| S11_k141_321186                             | 1205 | No | NA | 0 | 1 | Low-quality      | Genome-fragment | 1.46 | 0 |
| S1-final-viral-combined_k141_120667 full    | 1205 | No | NA | 1 | 0 | Low-quality      | Genome-fragment | 0.48 | 0 |
| S11-final-viral-combined_k141_172134 H2gene | 1981 | No | NA | 0 | 0 | Not-determined   | Genome-fragment | NA   | 0 |
| S11-final-viral-combined_k141_172323 H2gene | 1141 | No | NA | 1 | 1 | Not-determined   | Genome-fragment | NA   | 0 |
| S11-final-viral-combined_k141_48007 H2gene  | 1708 | No | NA | 0 | 0 | Not-determined   | Genome-fragment | NA   | 0 |
| S1-final-viral-combined_k141_230061 full    | 1205 | No | NA | 0 | 2 | Low-quality      | Genome-fragment | 2.1  | 0 |
| S1-final-viral-combined_k141_216041 full    | 1205 | No | NA | 0 | 0 | Low-quality      | Genome-fragment | 2.78 | 0 |
| S5-final-viral-combined_k141_142451 full    | 1205 | No | NA | 0 | 0 | Low-quality      | Genome-fragment | 2.93 | 0 |
| S11-final-viral-combined_k141_199423 H2gene | 2659 | No | NA | 0 | 1 | Not-determined   | Genome-fragment | NA   | 0 |
| S7-final-viral-combined_k141_48740 full     | 1205 | No | NA | 2 | 0 | Low-quality      | Genome-fragment | 3.35 | 0 |
| S7-final-viral-combined_k141_185308 H2gene  | 1205 | No | NA | 0 | 0 | Low-quality      | Genome-fragment | 3.49 | 0 |
| S7-final-viral-combined_k141_49041 H2gene   | 1205 | No | NA | 2 | 0 | Low-quality      | Genome-fragment | 2.43 | 0 |
| S17-final-viral-combined_k141_219670 full   | 1205 | No | NA | 0 | 0 | Low-quality      | Genome-fragment | 1.87 | 0 |
| S12_k141_151420                             | 1205 | No | NA | 0 | 0 | Low-quality      | Genome-fragment | 3.14 | 0 |
| S11-final-viral-combined_k141_283307 H2gene | 1079 | No | NA | 0 | 1 | Not-determined   | Genome-fragment | NA   | 0 |
| S12_k141_97556                              | 1205 | No | NA | 0 | 0 | Low-quality      | Genome-fragment | 1.22 | 0 |
| S11-final-viral-combined_k141_214660 H2gene | 1179 | No | NA | 0 | 1 | Not-determined   | Genome-fragment | NA   | 0 |
| S8-final-viral-combined_k141_195815 full    | 1205 | No | NA | 0 | 0 | Low-quality      | Genome-fragment | 2.9  | 0 |
| S9-final-viral-combined_k141_171561 full    | 1206 | No | NA | 0 | 0 | Low-quality      | Genome-fragment | 2.78 | 0 |
| S9-final-viral-combined_k141_89485 H2gene   | 1206 | No | NA | 0 | 1 | Low-quality      | Genome-fragment | 2.16 | 0 |
| S9-final-viral-combined_k141_9730 H2gene    | 1206 | No | NA | 1 | 0 | Low-quality      | Genome-fragment | 2.93 | 0 |
| S9_k141_99754                               | 1206 | No | NA | 0 | 0 | Low-quality      | Genome-fragment | 0.13 | 0 |
| S11_k141_221243                             | 1206 | No | NA | 2 | 0 | Low-quality      | Genome-fragment | 2.47 | 0 |
| S5-final-viral-combined_k141_46648 full     | 1206 | No | NA | 0 | 0 | Low-quality      | Genome-fragment | 0.61 | 0 |
| S5-final-viral-combined_k141_56475 full     | 1206 | No | NA | 0 | 4 | Low-quality      | Genome-fragment | 0.35 | 0 |
| S5_k141_154735                              | 1206 | No | NA | 0 | 0 | Low-quality      | Genome-fragment | 2.01 | 0 |
| S5_k141_164351                              | 1206 | No | NA | 0 | 0 | Low-quality      | Genome-fragment | 1.83 | 0 |
| S17-final-viral-combined_k141_119274 full   | 1206 | No | NA | 1 | 0 | Low-quality      | Genome-fragment | 2.39 | 0 |
| S2-final-viral-combined_k141_236495 full    | 1206 | No | NA | 0 | 1 | Low-quality      | Genome-fragment | 1.97 | 0 |
| S2-final-viral-combined_k141_61183 full     | 1206 | No | NA | 0 | 2 | Low-quality      | Genome-fragment | 3.07 | 0 |
| S2-final-viral-combined_k141_528515 H2gene  | 1206 | No | NA | 1 | 0 | Low-quality      | Genome-fragment | 2.23 | 0 |
| S2_k141_67303                               | 1206 | No | NA | 0 | 2 | Low-quality      | Genome-fragment | 1.15 | 0 |
| S9-final-viral-combined_k141_104303 full    | 1207 | No | NA | 0 | 1 | Low-quality      | Genome-fragment | 1    | 0 |
| S11-final-viral-combined_k141_49830 H2gene  | 2119 | No | NA | 0 | 0 | Not-determined   | Genome-fragment | NA   | 0 |
| S11-final-viral-combined_k141_246168 full   | 1207 | No | NA | 1 | 0 | Low-quality      | Genome-fragment | 0.63 | 0 |
| S11-final-viral-combined_k141_33841 H2gene  | 1207 | No | NA | 0 | 1 | Low-quality      | Genome-fragment | 3.27 | 0 |
| S11-final-viral-combined_k141_215125 H2gene | 1695 | No | NA | 0 | 0 | Not-determined   | Genome-fragment | NA   | 0 |
| S11-final-viral-combined_k141_297882 H2gene | 1474 | No | NA | 0 | 0 | Not-determined   | Genome-fragment | NA   | 0 |
| S11-final-viral-combined_k141_379162 H2gene | 1207 | No | NA | 1 | 0 | Low-quality      | Genome-fragment | 3.11 | 0 |
| S1-final-viral-combined_k141_286591 H2gene  | 1207 | No | NA | 2 | 0 | Low-quality      | Genome-fragment | 2.7  | 0 |
| S5-final-viral-combined_k141_60396 full     | 1207 | No | NA | 0 | 0 | Low-quality      | Genome-fragment | 0.86 | 0 |
| S11-final-viral-combined_k141_187742 H2gene | 1650 | No | NA | 0 | 1 | Not-determined   | Genome-fragment | NA   | 0 |
| S17-final-viral-combined_k141_558641 full   | 1207 | No | NA | 0 | 0 | Low-quality      | Genome-fragment | 2.84 | 0 |
| S17-final-viral-combined_k141_171005 H2gene | 1207 | No | NA | 0 | 0 | Low-quality      | Genome-fragment | 2.99 | 0 |
| S12-final-viral-combined_k141_137414 full   | 1207 | No | NA | 2 | 0 | Low-quality      | Genome-fragment | 1.21 | 0 |
| S2_k141_34522                               | 1207 | No | NA | 0 | 1 | Low-quality      | Genome-fragment | 0.53 | 0 |
| S11-final-viral-combined_k141_92255 H2gene  | 1012 | No | NA | 0 | 0 | Not-determined   | Genome-fragment | NA   | 0 |
| S6_k141_81841                               | 1207 | No | NA | 1 | 0 | Low-quality      | Genome-fragment | 2.24 | 0 |
| S8-final-viral-combined_k141_238854 full    | 1207 | No | NA | 0 | 0 | Low-quality      | Genome-fragment | 1.77 | 0 |
| S11-final-viral-combined_k141_92505 H2gene  | 1884 | No | NA | 0 | 1 | Not-determined   | Genome-fragment | NA   | 0 |
| S8-final-viral-combined_k141_88664 full     | 1207 | No | NA | 0 | 0 | Low-quality      | Genome-fragment | 2.64 | 0 |
| S9-final-viral-combined_k141_106750 full    | 1208 | No | NA | 0 | 1 | Low-quality      | Genome-fragment | 0.59 | 0 |
| S11_k141_95751                              | 1208 | No | NA | 0 | 0 | Low-quality      | Genome-fragment | 2.41 | 0 |
| S1-final-viral-combined_k141_319764 full    | 1208 | No | NA | 0 | 0 | Low-quality      | Genome-fragment | 3.12 | 0 |
| S1_k141_221333                              | 1208 | No | NA | 0 | 0 | Low-quality      | Genome-fragment | 6.92 | 0 |
| S5-final-viral-combined_k141_58107 full     | 1208 | No | NA | 1 | 0 | Low-quality      | Genome-fragment | 0.83 | 0 |
| S5_k141_36810                               | 1208 | No | NA | 0 | 0 | Low-quality      | Genome-fragment | 1.85 | 0 |
| S5_k141_5150                                | 1208 | No | NA | 0 | 1 | Low-quality      | Genome-fragment | 2.59 | 0 |
| S17_k141_223433                             | 1208 | No | NA | 1 | 0 | Low-quality      | Genome-fragment | 1.19 | 0 |
| S12-final-viral-combined_k141_52293 H2gene  | 1208 | No | NA | 1 | 0 | Low-quality      | Genome-fragment | 2.43 | 0 |
| S11-final-viral-combined_k141_133362 H2gene | 1466 | No | NA | 0 | 1 | Not-determined   | Genome-fragment | NA   | 0 |
| S11-final-viral-combined_k141_133368 H2gene | 1322 | No | NA | 0 | 0 | Not-determined   | Genome-fragment | NA   | 0 |
| S11-final-viral-combined_k141_299486 H2gene | 1534 | No | NA | 0 | 0 | Not-determined   | Genome-fragment | NA   | 0 |
| S2-final-viral-combined_k141_238441 full    | 1208 | No | NA | 0 | 1 | Low-quality      | Genome-fragment | 8.93 | 0 |
| S11-final-viral-combined_k141_245491 H2gene | 1159 | No | NA | 0 | 0 | Not-determined   | Genome-fragment | NA   | 0 |
| S2_k141_3467                                | 1208 | No | NA | 0 | 0 | Low-quality      | Genome-fragment | 1.57 | 0 |
| S4-final-viral-combined_k141_92344 H2gene   | 1208 | No | NA | 0 | 0 | Low-quality      | Genome-fragment | 1.95 | 0 |
| S6-final-viral-combined_k141_87499 full     | 1208 | No | NA | 1 | 0 | Low-quality      | Genome-fragment | 0.77 | 0 |
| S11-final-viral-combined_k141_52520 H2gene  | 1289 | No | NA | 0 | 0 | Not-determined   | Genome-fragment | NA   | 0 |
| S9-final-viral-combined_k141_105401 H2gene  | 1209 | No | NA | 1 | 0 | Low-quality      | Genome-fragment | 1.41 | 0 |
| S11-final-viral-combined_k141_321955 full   | 1209 | No | NA | 0 | 0 | Low-quality      | Genome-fragment | 2.73 | 0 |
| S11-final-viral-combined_k141_151522 full   | 1209 | No | NA | 0 | 1 | Low-quality      | Genome-fragment | 0.7  | 0 |
| S5-final-viral-combined_k141_31755 full     | 1209 | No | NA | 0 | 0 | Low-quality      | Genome-fragment | 2.53 | 0 |
| S11-final-viral-combined_k141_201764 H2gene | 381  | No | NA | 0 | 1 | Not-determined   | Genome-fragment | NA   | 0 |
| S5-final-viral-combined_k141_127001 H2gene  | 1209 | No | NA | 1 | 0 | Low-quality      | Genome-fragment | 2.74 | 0 |
| S7-final-viral-combined_k141_105038 full    | 1209 | No | NA | 0 | 0 | Low-quality      | Genome-fragment | 2.54 | 0 |
| S7_k141_188626                              | 1209 | No | NA | 0 | 0 | Low-quality      | Genome-fragment | 2.75 | 0 |
| S12-final-viral-combined_k141_61143 full    | 1209 | No | NA | 0 | 0 | Low-quality      | Genome-fragment | 1.57 | 0 |
| S12-final-viral-combined_k141_94434 full    | 1209 | No | NA | 0 | 0 | Low-quality      | Genome-fragment | 3.56 | 0 |
| S12-final-viral-combined_k141_356060 H2gene | 1209 | No | NA | 1 | 0 | Low-quality      | Genome-fragment | 1.32 | 0 |
| S11-final-viral-combined_k141_255887 H2gene | 1084 | No | NA | 0 | 0 | Not-determined   | Genome-fragment | NA   | 0 |
| S11-final-viral-combined_k141_326970 H2gene | 2305 | No | NA | 0 | 1 | Not-determined   | Genome-fragment | NA   | 0 |
| S12-final-viral-combined_k141_14071 full    | 1209 | No | NA | 1 | 0 | Low-quality      | Genome-fragment | 3.71 | 0 |
| S8-final-viral-combined_k141_174862 full    | 1209 | No | NA | 0 | 0 | Low-quality      | Genome-fragment | 8.37 | 0 |
| S11-final-viral-combined_k141_314649 H2gene | 1275 | No | NA | 0 | 1 | Not-determined   | Genome-fragment | NA   | 0 |
| S11-final-viral-combined_k141_94169 H2gene  | 1261 | No | NA | 0 | 0 | Not-determined   | Genome-fragment | NA   | 0 |
| S8-final-viral-combined_k141_245753 full    | 1209 | No | NA | 0 | 0 | Low-quality      | Genome-fragment | 2.48 | 0 |
| S11-final-viral-combined_k141_287719 H2gene | 1740 | No | NA | 0 | 0 | Not-determined   | Genome-fragment | NA   | 0 |
| S8-final-viral-combined_k141_120292 H2gene  | 1209 | No | NA | 1 | 0 | Low-quality      | Genome-fragment | 1.29 | 0 |
| S11-final-viral-combined_k141_224033 full   | 1210 | No | NA | 1 | 0 | Low-quality      | Genome-fragment | 2.75 | 0 |
| S11-final-viral-combined_k141_174266 full   | 1210 | No | NA | 0 | 0 | Low-quality      | Genome-fragment | 2.64 | 0 |
| S5-final-viral-combined_k141_109141 full    | 1210 | No | NA | 0 | 0 | Low-quality      | Genome-fragment | 1.9  | 0 |
| S7-final-viral-combined_k141_147086 full    | 1210 | No | NA | 0 | 0 | Low-quality      | Genome-fragment | 2.17 | 0 |
| S12-final-viral-combined_k141_345425 H2gene | 1210 | No | NA | 0 | 0 | Low-quality      | Genome-fragment | 2.04 | 0 |
| S12_k141_372566                             | 1210 | No | NA | 1 | 0 | Low-quality      | Genome-fragment | 0.65 | 0 |
| S2-final-viral-combined_k141_209302 H2gene  | 1210 | No | NA | 1 | 0 | Low-quality      | Genome-fragment | 0.78 | 0 |
| S2_k141_115807                              | 1210 | No | NA | 0 | 0 | Low-quality      | Genome-fragment | 1.72 | 0 |
| S4_k141_40472                               | 1210 | No | NA | 0 | 0 | Low-quality      | Genome-fragment | 1.96 | 0 |
| S11-final-viral-combined_k141_315939 H2gene | 1276 | No | NA | 0 | 0 | Not-determined   | Genome-fragment | NA   | 0 |
| S11-final-viral-combined_k141_109164 H2gene | 1329 | No | NA | 0 | 0 | Not-determined   | Genome-fragment | NA   | 0 |
| S11-final-viral-combined_k141_247683 H2gene | 1036 | No | NA | 0 | 0 | Not-determined   | Genome-fragment | NA   | 0 |
| S11-final-viral-combined_k141_54378 H2gene  | 1003 | No | NA | 0 | 0 | Not-determined   | Genome-fragment | NA   | 0 |
| S11-final-viral-combined_k141_247740 H2gene | 1382 | No | NA | 0 | 0 | Not-determined   | Genome-fragment | NA   | 0 |
| S11-final-viral-combined_k141_301420 H2gene | 2040 | No | NA | 0 | 1 | Not-determined   | Genome-fragment | NA   | 0 |
| S11-final-viral-combined_k141_71632 full    | 1211 | No | NA | 1 | 0 | Low-quality      | Genome-fragment | 3.04 | 0 |
| S3-final-viral-combined_k141_15845 full     | 1211 | No | NA | 0 | 1 | Low-quality      | Genome-fragment | 1.65 | 0 |
| S11-final-viral-combined_k141_219235 H2gene | 1365 | No | NA | 0 | 0 | Not-determined</ |                 |      |   |



|                                               |       |    |    |    |   |                |                 |       |   |
|-----------------------------------------------|-------|----|----|----|---|----------------|-----------------|-------|---|
| S12-final-viral-combined_k141_745961[full]    | 1212  | No | NA | 1  | 0 | Low-quality    | Genome-fragment | 2.45  | 0 |
| S11_k141_09070                                | 1340  | No | NA | 0  | 2 | Not-determined | Genome-fragment | NA    | 0 |
| S11_k141_317161                               | 1391  | No | NA | 0  | 1 | Not-determined | Genome-fragment | NA    | 0 |
| S2-final-viral-combined_k141_238876[full]     | 1212  | No | NA | 1  | 0 | Low-quality    | Genome-fragment | 2.73  | 0 |
| S11_k141_234402                               | 1150  | No | NA | 0  | 1 | Not-determined | Genome-fragment | NA    | 0 |
| S11_k141_124294                               | 1285  | No | NA | 0  | 0 | Not-determined | Genome-fragment | NA    | 0 |
| S11_k141_69147                                | 2861  | No | NA | 0  | 1 | Not-determined | Genome-fragment | NA    | 0 |
| S11_k141_55340                                | 1176  | No | NA | 0  | 1 | Not-determined | Genome-fragment | NA    | 0 |
| S11_k141_303398                               | 25741 | No | NA | 4  | 0 | Medium-quality | Genome-fragment | 59.61 | 0 |
| S11_k141_317187                               | 6935  | No | NA | 0  | 5 | Not-determined | Genome-fragment | NA    | 0 |
| S11_k141_317193                               | 1152  | No | NA | 0  | 0 | Not-determined | Genome-fragment | NA    | 0 |
| S11_k141_193176                               | 5286  | No | NA | 0  | 4 | Not-determined | Genome-fragment | NA    | 0 |
| S11_k141_289586                               | 1460  | No | NA | 0  | 1 | Not-determined | Genome-fragment | NA    | 0 |
| S11_k141_69159                                | 2835  | No | NA | 0  | 0 | Not-determined | Genome-fragment | NA    | 0 |
| S2_k141_41821                                 | 1212  | No | NA | 0  | 1 | Low-quality    | Genome-fragment | 0.53  | 0 |
| S4_k141_68819                                 | 1212  | No | NA | 0  | 0 | Low-quality    | Genome-fragment | 0.39  | 0 |
| S8-final-viral-combined_k141_95571[full]      | 1212  | No | NA | 0  | 2 | Low-quality    | Genome-fragment | 1.22  | 0 |
| S11_k141_151897                               | 1009  | No | NA | 0  | 1 | Not-determined | Genome-fragment | NA    | 0 |
| S11_k141_214460                               | 1275  | No | NA | 0  | 0 | Not-determined | Genome-fragment | NA    | 0 |
| S9-final-viral-combined_k141_79144[full]      | 1213  | No | NA | 0  | 0 | Low-quality    | Genome-fragment | 3.12  | 0 |
| S11_k141_179422                               | 1007  | No | NA | 0  | 0 | Not-determined | Genome-fragment | NA    | 0 |
| S11_k141_110470                               | 1558  | No | NA | 0  | 0 | Not-determined | Genome-fragment | NA    | 0 |
| S1_k141_18532                                 | 1213  | No | NA | 1  | 0 | Low-quality    | Genome-fragment | 3.6   | 0 |
| S11_k141_165734                               | 1329  | No | NA | 0  | 1 | Not-determined | Genome-fragment | NA    | 0 |
| S17-final-viral-combined_k141_22629[102gene]  | 1213  | No | NA | 1  | 0 | Low-quality    | Genome-fragment | 2.95  | 0 |
| S11_k141_153248                               | 1488  | No | NA | 0  | 2 | Not-determined | Genome-fragment | NA    | 0 |
| S11_k141_165752                               | 1250  | No | NA | 0  | 3 | Not-determined | Genome-fragment | NA    | 0 |
| S11_k141_220873                               | 1120  | No | NA | 0  | 1 | Not-determined | Genome-fragment | NA    | 0 |
| S11_k141_271835                               | 1258  | No | NA | 0  | 1 | Not-determined | Genome-fragment | NA    | 0 |
| S11_k141_124458                               | 4269  | No | NA | 0  | 3 | Not-determined | Genome-fragment | NA    | 0 |
| S17-k141_34166                                | 1213  | No | NA | 0  | 0 | Low-quality    | Genome-fragment | 2.84  | 0 |
| S11_k141_165812                               | 5881  | No | NA | 0  | 5 | Not-determined | Genome-fragment | NA    | 0 |
| S17-k141_239172                               | 1213  | No | NA | 0  | 1 | Low-quality    | Genome-fragment | 0.83  | 0 |
| S11_k141_207078                               | 1178  | No | NA | 0  | 1 | Not-determined | Genome-fragment | NA    | 0 |
| S11_k141_163831                               | 1826  | No | NA | 0  | 1 | Not-determined | Genome-fragment | NA    | 0 |
| S11_k141_193295                               | 1144  | No | NA | 0  | 1 | Not-determined | Genome-fragment | NA    | 0 |
| S11_k141_248378                               | 1318  | No | NA | 0  | 0 | Not-determined | Genome-fragment | NA    | 0 |
| S17-k141_175284                               | 1213  | No | NA | 0  | 0 | Low-quality    | Genome-fragment | 2.79  | 0 |
| S11_k141_110548                               | 1585  | No | NA | 0  | 0 | Not-determined | Genome-fragment | NA    | 0 |
| S12-final-viral-combined_k141_228179[full]    | 1213  | No | NA | 1  | 0 | Low-quality    | Genome-fragment | 3.04  | 0 |
| S11_k141_96843                                | 1112  | No | NA | 0  | 1 | Not-determined | Genome-fragment | NA    | 0 |
| S11_k141_152004                               | 1191  | No | NA | 0  | 0 | Not-determined | Genome-fragment | NA    | 0 |
| S11_k141_165906                               | 9212  | No | NA | 0  | 3 | Not-determined | Genome-fragment | NA    | 0 |
| S11_k141_193357                               | 4053  | No | NA | 0  | 1 | Not-determined | Genome-fragment | NA    | 0 |
| S11_k141_41607                                | 9671  | No | NA | 0  | 6 | Not-determined | Genome-fragment | NA    | 0 |
| S2-final-viral-combined_k141_210184[full]     | 1213  | No | NA | 2  | 0 | Low-quality    | Genome-fragment | 2.59  | 0 |
| S11_k141_152031                               | 1170  | No | NA | 0  | 0 | Not-determined | Genome-fragment | NA    | 0 |
| S11_k141_124508                               | 1684  | No | NA | 0  | 0 | Not-determined | Genome-fragment | NA    | 0 |
| S11_k141_28007                                | 1114  | No | NA | 0  | 0 | Not-determined | Genome-fragment | NA    | 0 |
| S11_k141_110599                               | 2991  | No | NA | 0  | 2 | Not-determined | Genome-fragment | NA    | 0 |
| S2-final-viral-combined_k141_78542[full]      | 1213  | No | NA | 1  | 0 | Low-quality    | Genome-fragment | 2.68  | 0 |
| S11_k141_124518                               | 6072  | No | NA | 0  | 2 | Not-determined | Genome-fragment | NA    | 0 |
| S11_k141_275977                               | 1071  | No | NA | 0  | 0 | Not-determined | Genome-fragment | NA    | 0 |
| S9-final-viral-combined_k141_35052[full]      | 1214  | No | NA | 1  | 0 | Low-quality    | Genome-fragment | 2.7   | 0 |
| S11_k141_165970                               | 1327  | No | NA | 0  | 0 | Not-determined | Genome-fragment | NA    | 0 |
| S11_k141_152076                               | 8724  | No | NA | 0  | 5 | Not-determined | Genome-fragment | NA    | 0 |
| S11_k141_276013                               | 1247  | No | NA | 0  | 0 | Not-determined | Genome-fragment | NA    | 0 |
| S11_k141_220939                               | 1624  | No | NA | 0  | 1 | Not-determined | Genome-fragment | NA    | 0 |
| S11_k141_276045                               | 2511  | No | NA | 0  | 1 | Not-determined | Genome-fragment | NA    | 0 |
| S11_k141_41710                                | 5452  | No | NA | 0  | 0 | Not-determined | Genome-fragment | NA    | 0 |
| S11_k141_124601                               | 6510  | No | NA | 0  | 2 | Not-determined | Genome-fragment | NA    | 0 |
| S9_k141_4083                                  | 1214  | No | NA | 0  | 0 | Low-quality    | Genome-fragment | 2.41  | 0 |
| S11_k141_193395                               | 1600  | No | NA | 0  | 0 | Not-determined | Genome-fragment | NA    | 0 |
| S11_k141_474                                  | 6135  | No | NA | 0  | 0 | Not-determined | Genome-fragment | NA    | 0 |
| S11_k141_152143                               | 1816  | No | NA | 0  | 1 | Not-determined | Genome-fragment | NA    | 0 |
| S11_k141_317508                               | 2225  | No | NA | 0  | 1 | Not-determined | Genome-fragment | NA    | 0 |
| S11-final-viral-combined_k141_323594[full]    | 1214  | No | NA | 0  | 0 | Low-quality    | Genome-fragment | 2.06  | 0 |
| S11_k141_152145                               | 5554  | No | NA | 0  | 2 | Not-determined | Genome-fragment | NA    | 0 |
| S11_k141_155410                               | 58459 | No | NA | 27 | 2 | Medium-quality | Genome-fragment | 78.18 | 0 |
| S11_k141_28096                                | 5032  | No | NA | 0  | 4 | Not-determined | Genome-fragment | NA    | 0 |
| S11-final-viral-combined_k141_132632[full]    | 1214  | No | NA | 3  | 0 | Low-quality    | Genome-fragment | 2.68  | 0 |
| S11-final-viral-combined_k141_303499[102gene] | 1214  | No | NA | 0  | 0 | Low-quality    | Genome-fragment | 1.73  | 0 |
| S11_k141_289837                               | 2224  | No | NA | 0  | 0 | Not-determined | Genome-fragment | NA    | 0 |
| S11_k141_234833                               | 7240  | No | NA | 0  | 4 | Not-determined | Genome-fragment | NA    | 0 |
| S11_k141_141290                               | 52675 | No | NA | 16 | 2 | Complete       | Genome-fragment | 100   | 0 |
| S11_k141_289849                               | 4677  | No | NA | 0  | 1 | Not-determined | Genome-fragment | NA    | 0 |
| S11_k141_193489                               | 5847  | No | NA | 0  | 3 | Not-determined | Genome-fragment | NA    | 0 |
| S1-final-viral-combined_k141_377767[full]     | 1214  | No | NA | 1  | 0 | Low-quality    | Genome-fragment | 2.86  | 0 |
| S11_k141_234871                               | 1358  | No | NA | 0  | 0 | Not-determined | Genome-fragment | NA    | 0 |
| S1-final-viral-combined_k141_161820[102gene]  | 1214  | No | NA | 2  | 0 | Low-quality    | Genome-fragment | 2.99  | 0 |
| S9_k141_78616                                 | 1214  | No | NA | 1  | 0 | Low-quality    | Genome-fragment | 3.15  | 0 |
| S7-final-viral-combined_k141_93029[full]      | 1214  | No | NA | 0  | 0 | Low-quality    | Genome-fragment | 1.87  | 0 |
| S11_k141_193551                               | 1387  | No | NA | 0  | 0 | Not-determined | Genome-fragment | NA    | 0 |
| S11_k141_276200                               | 1533  | No | NA | 0  | 1 | Not-determined | Genome-fragment | NA    | 0 |
| S11_k141_193566                               | 3760  | No | NA | 0  | 1 | Not-determined | Genome-fragment | NA    | 0 |
| S7-final-viral-combined_k141_141821[full]     | 1214  | No | NA | 0  | 2 | Low-quality    | Genome-fragment | 0.39  | 0 |
| S11_k141_152284                               | 1756  | No | NA | 0  | 0 | Not-determined | Genome-fragment | NA    | 0 |
| S11_k141_124809                               | 1603  | No | NA | 0  | 2 | Not-determined | Genome-fragment | NA    | 0 |
| S11_k141_515                                  | 1073  | No | NA | 0  | 1 | Not-determined | Genome-fragment | NA    | 0 |
| S17-final-viral-combined_k141_191529[full]    | 1214  | No | NA | 1  | 0 | Low-quality    | Genome-fragment | 1.7   | 0 |
| S11_k141_289996                               | 1033  | No | NA | 0  | 1 | Not-determined | Genome-fragment | NA    | 0 |
| S11_k141_97176                                | 1176  | No | NA | 0  | 1 | Not-determined | Genome-fragment | NA    | 0 |
| S17-final-viral-combined_k141_98303[full]     | 1214  | No | NA | 1  | 0 | Low-quality    | Genome-fragment | 2.47  | 0 |
| S11_k141_83308                                | 4753  | No | NA | 0  | 1 | Not-determined | Genome-fragment | NA    | 0 |
| S11_k141_69569                                | 2665  | No | NA | 0  | 2 | Not-determined | Genome-fragment | NA    | 0 |
| S11_k141_193635                               | 1856  | No | NA | 0  | 2 | Not-determined | Genome-fragment | NA    | 0 |
| S11_k141_193655                               | 1045  | No | NA | 0  | 1 | Not-determined | Genome-fragment | NA    | 0 |
| S11_k141_97223                                | 1191  | No | NA | 0  | 1 | Not-determined | Genome-fragment | NA    | 0 |
| S11_k141_176339                               | 2177  | No | NA | 0  | 1 | Not-determined | Genome-fragment | NA    | 0 |
| S11_k141_110886                               | 1342  | No | NA | 0  | 1 | Not-determined | Genome-fragment | NA    | 0 |
| S12_k141_98019                                | 1214  | No | NA | 0  | 0 | Low-quality    | Genome-fragment | 2.61  | 0 |
| S11_k141_207380                               | 1311  | No | NA | 0  | 0 | Not-determined | Genome-fragment | NA    | 0 |
| S2-final-viral-combined_k141_85209[full]      | 1214  | No | NA | 0  | 0 | Low-quality    | Genome-fragment | 2.93  | 0 |
| S11_k141_290078                               | 1232  | No | NA | 0  | 1 | Not-determined | Genome-fragment | NA    | 0 |
| S11_k141_69651                                | 7232  | No | NA | 0  | 6 | Not-determined | Genome-fragment | NA    | 0 |
| S11_k141_193716                               | 1942  | No | NA | 0  | 2 | Not-determined | Genome-fragment | NA    | 0 |
| S11_k141_138544                               | 1039  | No | NA | 0  | 2 | Not-determined | Genome-fragment | NA    | 0 |
| S2-final-viral-combined_k141_8661[full]       | 1214  | No | NA | 0  | 0 | Low-quality    | Genome-fragment | 2.15  | 0 |
| S11_k141_152423                               | 1036  | No | NA | 0  | 1 | Not-determined | Genome-fragment | NA    | 0 |
| S11_k141_303977                               | 4802  | No | NA | 0  | 2 | Not-determined | Genome-fragment | NA    | 0 |
| S11_k141_28333                                | 4189  | No | NA | 0  | 4 | Not-determined | Genome-fragment | NA    | 0 |
| S11_k141_758                                  | 4660  | No | NA | 0  | 1 | Not-determined | Genome-fragment | NA    | 0 |
| S11_k141_97342                                | 1323  | No | NA | 0  | 1 | Not-determined | Genome-fragment | NA    | 0 |
| S11_k141_790                                  | 1099  | No | NA | 0  | 0 | Not-determined | Genome-fragment | NA    | 0 |
| S11_k141_262644                               | 1305  | No | NA | 0  | 1 | Not-determined | Genome-fragment | NA    | 0 |
| S11_k141_820                                  | 3390  | No | NA | 0  | 2 | Not-determined | Genome-fragment | NA    | 0 |
| S11_k141_276471                               | 4483  | No | NA | 0  | 0 | Not-determined | Genome-fragment | NA    | 0 |
| S11_k141_138641                               | 1229  | No | NA | 0  | 0 | Not-determined | Genome-fragment | NA    | 0 |
| S4-final-viral-combined_k141_23531[full]      | 1214  | No | NA | 0  | 0 | Low-quality    | Genome-fragment | 1.57  | 0 |
| S11_k141_28409                                | 4185  | No | NA | 0  | 3 | Not-determined | Genome-fragment | NA    | 0 |
| S4_k141_128382                                | 1214  | No | NA | 0  | 1 | Low-quality    | Genome-fragment | 0.43  | 0 |
| S11_k141_179873                               | 2811  | No | NA | 0  | 2 | Not-determined | Genome-fragment | NA    | 0 |
| S11_k141_28421                                | 1068  | No | NA | 0  | 1 | Not-determined | Genome-fragment | NA    | 0 |
| S6-final-viral-combined_k141_44845[full]      | 1214  | No | NA | 0  | 0 | Low-quality    | Genome-fragment | 3.05  | 0 |
| S11_k141_235285                               | 1394  | No | NA | 0  | 1 | Not-determined | Genome-fragment | NA    | 0 |
| S6-final-viral-combined_k141_134369[full]     | 1214  | No | NA | 0  | 1 | Low-quality    | Genome-fragment | 0.44  | 0 |
| S11_k141_235313                               | 2204  | No | NA | 0  | 2 | Not-determined | Genome-fragment | NA    | 0 |
| S11_k141_207625                               | 4441  | No | NA | 0  | 3 | Not-determined | Genome-fragment | NA    | 0 |
| S11_k141_111136                               | 2575  | No | NA | 0  | 0 | Not-determined | Genome-fragment | NA    | 0 |
| S11_k141_179994                               | 2102  | No | NA | 0  | 1 | Not-determined | Genome-fragment | NA    | 0 |
| S11_k141_249009                               | 1842  | No | NA | 0  | 1 | Not-determined | Genome-fragment | NA    | 0 |
| S11_k141_97374                                | 1111  | No | NA | 0  | 0 | Not-determined | Genome-fragment | NA    | 0 |
| S11_k141_166613                               | 2755  | No | NA | 0  | 3 | Not-determined | Genome-fragment | NA    | 0 |
| S11_k141_304203                               | 3181  | No | NA | 0  | 2 | Not-determined | Genome-fragment | NA    | 0 |
| S11_k141_42194                                | 4668  | No | NA | 0  | 2 | Not-determined | Genome-fragment | NA    | 0 |
| S11_k141_249062                               | 1408  | No | NA | 0  | 1 | Not-determined | Genome-fragment | NA    | 0 |
| S11_k141_166679                               | 1160  | No | NA | 0  | 1 | Not-determined | Genome-fragment | NA    | 0 |
| S11_k141_1030                                 | 2785  | No | NA | 0  | 0 | Not-determined | Genome-fragment | NA    | 0 |
| S11_k141_152723                               | 1070  | No | NA | 0  | 0 | Not-determined | Genome-fragment | NA    | 0 |
| S11_k141_152748                               | 3936  | No | NA | 0  | 2 | Not-determined | Genome-fragment | NA    | 0 |
| S11_k141_14851                                | 1738  | No | NA | 0  | 1 | Not-determined | Genome-fragment | NA    | 0 |
| S11_k141_262907                               | 1019  | No | NA | 0  | 0 | Not-determined | Genome-fragment | NA    | 0 |
| S11_k141_221549                               | 1436  | No | NA | 0  | 1 | Not-determined | Genome-fragment | NA    | 0 |
| S11_k141_249127                               | 1611  | No | NA | 0  | 1 | Not-determined | Genome-fragment | NA    | 0 |
| S6-final-viral-combined_k141_134838[full]     | 1214  | No | NA | 0  | 0 | Low-quality    | Genome-         |       |   |



|                                             |       |     |     |   |   |                |                 |      |       |
|---------------------------------------------|-------|-----|-----|---|---|----------------|-----------------|------|-------|
| S11_k141_70078                              | 2142  | No  | NA  | 0 | 1 | Not-determined | Genome-fragment | NA   | 0     |
| S11_k141_20735                              | 1724  | No  | NA  | 0 | 1 | Not-determined | Genome-fragment | NA   | 0     |
| S7-final-viral-combined_k141_4571  H2gene   | 1215  | No  | NA  | 1 | 0 | Low-quality    | Genome-fragment | NA   | 2.59  |
| S11_k141_318103                             | 2153  | No  | NA  | 0 | 2 | Not-determined | Genome-fragment | NA   | 0     |
| S11_k141_208089                             | 1048  | No  | NA  | 0 | 1 | Not-determined | Genome-fragment | NA   | 0     |
| S11_k141_263223                             | 2307  | No  | NA  | 0 | 1 | Not-determined | Genome-fragment | NA   | 0     |
| S11_k141_152933                             | 2432  | No  | NA  | 0 | 2 | Not-determined | Genome-fragment | NA   | 0     |
| S11_k141_290586                             | 1327  | No  | NA  | 0 | 2 | Not-determined | Genome-fragment | NA   | 0     |
| S17-final-viral-combined_k141_15164  full   | 1215  | No  | NA  | 0 | 0 | Low-quality    | Genome-fragment | NA   | 0.43  |
| S11_k141_180387                             | 1046  | No  | NA  | 0 | 0 | Not-determined | Genome-fragment | NA   | 0     |
| S11_k141_70149                              | 1258  | No  | NA  | 0 | 0 | Not-determined | Genome-fragment | NA   | 0     |
| S11_k141_290598                             | 1650  | No  | NA  | 0 | 0 | Not-determined | Genome-fragment | NA   | 0     |
| S11_k141_180423                             | 4813  | No  | NA  | 0 | 4 | Not-determined | Genome-fragment | NA   | 0     |
| S11_k141_15162                              | 3300  | No  | NA  | 0 | 2 | Not-determined | Genome-fragment | NA   | 0     |
| S11_k141_166981                             | 1136  | No  | NA  | 0 | 1 | Not-determined | Genome-fragment | NA   | 0     |
| S11_k141_249504                             | 4957  | No  | NA  | 0 | 2 | Not-determined | Genome-fragment | NA   | 0     |
| S11_k141_15196                              | 1887  | No  | NA  | 0 | 2 | Not-determined | Genome-fragment | NA   | 0     |
| S11_k141_249511                             | 1029  | No  | NA  | 0 | 2 | Not-determined | Genome-fragment | NA   | 0     |
| S11_k141_218192                             | 1129  | No  | NA  | 0 | 1 | Not-determined | Genome-fragment | NA   | 0     |
| S17-final-viral-combined_k141_163542  full  | 1215  | Yes | 471 | 1 | 1 | Low-quality    | Genome-fragment | 0.98 | 61.23 |
| S12-final-viral-combined_k141_124016  full  | 1215  | No  | NA  | 1 | 0 | Low-quality    | Genome-fragment | 2.23 | 0     |
| S12-final-viral-combined_k141_95069  H2gene | 1215  | No  | NA  | 0 | 0 | Low-quality    | Genome-fragment | 3.45 | 0     |
| S11_k141_15269                              | 1035  | No  | NA  | 0 | 1 | Not-determined | Genome-fragment | NA   | 0     |
| S11_k141_139058                             | 1122  | No  | NA  | 0 | 2 | Not-determined | Genome-fragment | NA   | 0     |
| S11_k141_194326                             | 15603 | No  | NA  | 0 | 7 | Not-determined | Genome-fragment | NA   | 0     |
| S11_k141_42731                              | 5776  | No  | NA  | 0 | 3 | Not-determined | Genome-fragment | NA   | 0     |
| S11_k141_249555                             | 1852  | No  | NA  | 0 | 0 | Not-determined | Genome-fragment | NA   | 0     |
| S11_k141_1421                               | 1335  | No  | NA  | 0 | 0 | Not-determined | Genome-fragment | NA   | 0     |
| S11_k141_180532                             | 1018  | No  | NA  | 0 | 1 | Not-determined | Genome-fragment | NA   | 0     |
| S2-final-viral-combined_k141_75390  full    | 1215  | No  | NA  | 1 | 0 | Low-quality    | Genome-fragment | 2.48 | 0     |
| S11_k141_1432                               | 12745 | No  | NA  | 0 | 5 | Not-determined | Genome-fragment | NA   | 0     |
| S11_k141_221881                             | 1096  | No  | NA  | 0 | 0 | Not-determined | Genome-fragment | NA   | 0     |
| S11_k141_263351                             | 1698  | No  | NA  | 0 | 3 | Not-determined | Genome-fragment | NA   | 0     |
| S11_k141_139113                             | 3497  | No  | NA  | 0 | 3 | Not-determined | Genome-fragment | NA   | 0     |
| S11_k141_167160                             | 2555  | No  | NA  | 0 | 0 | Not-determined | Genome-fragment | NA   | 0     |
| S11_k141_153073                             | 3250  | No  | NA  | 0 | 0 | Not-determined | Genome-fragment | NA   | 0     |
| S11_k141_111498                             | 1369  | No  | NA  | 0 | 0 | Not-determined | Genome-fragment | NA   | 0     |
| S11_k141_208306                             | 4111  | No  | NA  | 0 | 1 | Not-determined | Genome-fragment | NA   | 0     |
| S11_k141_153097                             | 2029  | No  | NA  | 0 | 2 | Not-determined | Genome-fragment | NA   | 0     |
| S2_k141_23464                               | 1215  | No  | NA  | 1 | 0 | Low-quality    | Genome-fragment | 1.37 | 0     |
| S11_k141_84301                              | 3462  | No  | NA  | 0 | 1 | Not-determined | Genome-fragment | NA   | 0     |
| S8-final-viral-combined_k141_274295  full   | 1215  | No  | NA  | 0 | 0 | Low-quality    | Genome-fragment | 2.83 | 0     |
| S11_k141_111551                             | 3702  | No  | NA  | 0 | 1 | Not-determined | Genome-fragment | NA   | 0     |
| S11_k141_56661                              | 3355  | No  | NA  | 0 | 2 | Not-determined | Genome-fragment | NA   | 0     |
| S8-final-viral-combined_k141_218076  full   | 1215  | No  | NA  | 0 | 0 | Low-quality    | Genome-fragment | 1.93 | 0     |
| S9-final-viral-combined_k141_85819  full    | 1216  | No  | NA  | 0 | 0 | Low-quality    | Genome-fragment | 2.48 | 0     |
| S11_k141_139322                             | 1195  | No  | NA  | 0 | 1 | Not-determined | Genome-fragment | NA   | 0     |
| S11-final-viral-combined_k141_43924  full   | 1216  | No  | NA  | 0 | 2 | Low-quality    | Genome-fragment | 4.01 | 0     |
| S11_k141_518440                             | 1621  | No  | NA  | 0 | 0 | Not-determined | Genome-fragment | NA   | 0     |
| S11-final-viral-combined_k141_256929  full  | 1216  | No  | NA  | 1 | 0 | Low-quality    | Genome-fragment | 0.79 | 0     |
| S11_k141_153247                             | 3195  | No  | NA  | 0 | 1 | Not-determined | Genome-fragment | NA   | 0     |
| S11_k141_84404                              | 1152  | No  | NA  | 0 | 1 | Not-determined | Genome-fragment | NA   | 0     |
| S11-final-viral-combined_k141_145692  full  | 1216  | No  | NA  | 0 | 0 | Low-quality    | Genome-fragment | 0.79 | 0     |
| S11_k141_208431                             | 1138  | No  | NA  | 0 | 1 | Not-determined | Genome-fragment | NA   | 0     |
| S11_k141_11626                              | 1262  | No  | NA  | 0 | 1 | Not-determined | Genome-fragment | NA   | 0     |
| S11_k141_236242                             | 2678  | No  | NA  | 0 | 2 | Not-determined | Genome-fragment | NA   | 0     |
| S11_k141_180781                             | 1460  | No  | NA  | 0 | 0 | Not-determined | Genome-fragment | NA   | 0     |
| S11_k141_56762                              | 7865  | No  | NA  | 0 | 3 | Not-determined | Genome-fragment | NA   | 0     |
| S11_k141_222262                             | 1124  | No  | NA  | 0 | 0 | Not-determined | Genome-fragment | NA   | 0     |
| S11_k141_194597                             | 1175  | No  | NA  | 0 | 0 | Not-determined | Genome-fragment | NA   | 0     |
| S11_k141_56786                              | 1630  | No  | NA  | 0 | 0 | Not-determined | Genome-fragment | NA   | 0     |
| S11_k141_277464                             | 1181  | No  | NA  | 0 | 0 | Not-determined | Genome-fragment | NA   | 0     |
| S11_k141_208515                             | 5999  | No  | NA  | 0 | 2 | Not-determined | Genome-fragment | NA   | 0     |
| S1-final-viral-combined_k141_202036  full   | 1216  | No  | NA  | 0 | 0 | Low-quality    | Genome-fragment | 2.61 | 0     |
| S11_k141_249784                             | 3833  | No  | NA  | 0 | 2 | Not-determined | Genome-fragment | NA   | 0     |
| S1-final-viral-combined_k141_344835  full   | 1216  | No  | NA  | 0 | 1 | Low-quality    | Genome-fragment | 2.87 | 0     |
| S1-final-viral-combined_k141_122176  H2gene | 1216  | No  | NA  | 1 | 0 | Low-quality    | Genome-fragment | 2.26 | 0     |
| S11_k141_98487                              | 1102  | No  | NA  | 0 | 1 | Not-determined | Genome-fragment | NA   | 0     |
| S11_k141_111752                             | 2358  | No  | NA  | 0 | 0 | Not-determined | Genome-fragment | NA   | 0     |
| S11_k141_125896                             | 1377  | No  | NA  | 0 | 0 | Not-determined | Genome-fragment | NA   | 0     |
| S11_k141_153395                             | 1021  | No  | NA  | 0 | 1 | Not-determined | Genome-fragment | NA   | 0     |
| S1_k141_174599                              | 1216  | No  | NA  | 0 | 0 | Low-quality    | Genome-fragment | 2.03 | 0     |
| S11_k141_222396                             | 1108  | No  | NA  | 0 | 0 | Not-determined | Genome-fragment | NA   | 0     |
| S3_k141_41591                               | 1216  | No  | NA  | 0 | 0 | Low-quality    | Genome-fragment | 7.33 | 0     |
| S11_k141_94637                              | 1546  | No  | NA  | 0 | 1 | Not-determined | Genome-fragment | NA   | 0     |
| S7-final-viral-combined_k141_71384  full    | 1216  | No  | NA  | 1 | 0 | Low-quality    | Genome-fragment | 3.22 | 0     |
| S11_k141_194754                             | 1109  | No  | NA  | 0 | 0 | Not-determined | Genome-fragment | NA   | 0     |
| S11_k141_249838                             | 1064  | No  | NA  | 0 | 0 | Not-determined | Genome-fragment | NA   | 0     |
| S17-final-viral-combined_k141_342573  full  | 1216  | No  | NA  | 0 | 0 | Low-quality    | Genome-fragment | 2.08 | 0     |
| S11_k141_167569                             | 5025  | No  | NA  | 0 | 3 | Not-determined | Genome-fragment | NA   | 0     |
| S11_k141_125994                             | 1989  | No  | NA  | 0 | 0 | Not-determined | Genome-fragment | NA   | 0     |
| S11_k141_249883                             | 1147  | No  | NA  | 0 | 0 | Not-determined | Genome-fragment | NA   | 0     |
| S11_k141_236471                             | 2019  | No  | NA  | 0 | 0 | Not-determined | Genome-fragment | NA   | 0     |
| S11_k141_98648                              | 1078  | No  | NA  | 0 | 2 | Not-determined | Genome-fragment | NA   | 0     |
| S11_k141_202878                             | 1058  | No  | NA  | 0 | 1 | Not-determined | Genome-fragment | NA   | 0     |
| S11_k141_98658                              | 1159  | No  | NA  | 0 | 1 | Not-determined | Genome-fragment | NA   | 0     |
| S6-final-viral-combined_k141_110879  full   | 1216  | No  | NA  | 0 | 2 | Low-quality    | Genome-fragment | 0.54 | 0     |
| S11_k141_84775                              | 1568  | No  | NA  | 0 | 0 | Not-determined | Genome-fragment | NA   | 0     |
| S11_k141_277740                             | 1610  | No  | NA  | 0 | 0 | Not-determined | Genome-fragment | NA   | 0     |
| S11_k141_1921                               | 1631  | No  | NA  | 0 | 1 | Not-determined | Genome-fragment | NA   | 0     |
| S8-final-viral-combined_k141_215  full      | 1216  | No  | NA  | 2 | 0 | Low-quality    | Genome-fragment | 2.2  | 0     |
| S11_k141_15963                              | 1657  | No  | NA  | 0 | 1 | Not-determined | Genome-fragment | NA   | 0     |
| S11_k141_318755                             | 1234  | No  | NA  | 0 | 1 | Not-determined | Genome-fragment | NA   | 0     |
| S11-final-viral-combined_k141_46076  full   | 1217  | No  | NA  | 0 | 0 | Low-quality    | Genome-fragment | 2.96 | 0     |
| S11_k141_181062                             | 1027  | No  | NA  | 0 | 0 | Not-determined | Genome-fragment | NA   | 0     |
| S11_k141_98728                              | 1152  | No  | NA  | 0 | 1 | Not-determined | Genome-fragment | NA   | 0     |
| S11_k141_263848                             | 2028  | No  | NA  | 0 | 1 | Not-determined | Genome-fragment | NA   | 0     |
| S11_k141_263867                             | 1551  | No  | NA  | 0 | 1 | Not-determined | Genome-fragment | NA   | 0     |
| S11_k141_117873                             | 1217  | No  | NA  | 0 | 0 | Low-quality    | Genome-fragment | 3.05 | 0     |
| S11_k141_277834                             | 2450  | No  | NA  | 0 | 0 | Not-determined | Genome-fragment | NA   | 0     |
| S11_k141_318838                             | 1024  | No  | NA  | 0 | 1 | Not-determined | Genome-fragment | NA   | 0     |
| S11_k141_181129                             | 2511  | No  | NA  | 0 | 2 | Not-determined | Genome-fragment | NA   | 0     |
| S1-final-viral-combined_k141_27278  full    | 1217  | No  | NA  | 2 | 0 | Low-quality    | Genome-fragment | 2.21 | 0     |
| S11_k141_208972                             | 1128  | No  | NA  | 0 | 2 | Not-determined | Genome-fragment | NA   | 0     |
| S11_k141_139747                             | 1202  | No  | NA  | 0 | 2 | Not-determined | Genome-fragment | NA   | 0     |
| S11_k141_277865                             | 1136  | No  | NA  | 0 | 1 | Not-determined | Genome-fragment | NA   | 0     |
| S11_k141_126172                             | 1030  | No  | NA  | 0 | 2 | Not-determined | Genome-fragment | NA   | 0     |
| S11_k141_2055                               | 1538  | No  | NA  | 0 | 1 | Not-determined | Genome-fragment | NA   | 0     |
| S11_k141_153579                             | 6515  | No  | NA  | 0 | 0 | Not-determined | Genome-fragment | NA   | 0     |
| S11_k141_318865                             | 1134  | No  | NA  | 0 | 1 | Not-determined | Genome-fragment | NA   | 0     |
| S11_k141_209016                             | 3466  | No  | NA  | 0 | 2 | Not-determined | Genome-fragment | NA   | 0     |
| S11_k141_305338                             | 1316  | No  | NA  | 0 | 1 | Not-determined | Genome-fragment | NA   | 0     |
| S1-final-viral-combined_k141_301569  H2gene | 1217  | No  | NA  | 1 | 0 | Low-quality    | Genome-fragment | 2.03 | 0     |
| S11_k141_236685                             | 1542  | No  | NA  | 0 | 2 | Not-determined | Genome-fragment | NA   | 0     |
| S11_k141_139811                             | 1232  | No  | NA  | 0 | 0 | Not-determined | Genome-fragment | NA   | 0     |
| S11_k141_250126                             | 1331  | No  | NA  | 0 | 1 | Not-determined | Genome-fragment | NA   | 0     |
| S3-final-viral-combined_k141_54798  full    | 1217  | No  | NA  | 0 | 0 | Low-quality    | Genome-fragment | 0.79 | 0     |
| S11_k141_277988                             | 2095  | No  | NA  | 0 | 2 | Not-determined | Genome-fragment | NA   | 0     |
| S11_k141_57339                              | 1130  | No  | NA  | 0 | 1 | Not-determined | Genome-fragment | NA   | 0     |
| S11_k141_318965                             | 3063  | No  | NA  | 0 | 0 | Not-determined | Genome-fragment | NA   | 0     |
| S11_k141_16088                              | 1157  | No  | NA  | 0 | 2 | Not-determined | Genome-fragment | NA   | 0     |
| S11_k141_98941                              | 1075  | No  | NA  | 0 | 1 | Not-determined | Genome-fragment | NA   | 0     |
| S11_k141_222692                             | 3870  | No  | NA  | 0 | 3 | Not-determined | Genome-fragment | NA   | 0     |
| S11_k141_70520                              | 1679  | No  | NA  | 0 | 1 | Not-determined | Genome-fragment | NA   | 0     |
| S11_k141_209154                             | 1679  | No  | NA  | 0 | 1 | Not-determined | Genome-fragment | NA   | 0     |
| S11_k141_70565                              | 1331  | No  | NA  | 0 | 1 | Not-determined | Genome-fragment | NA   | 0     |
| S3_k141_61697                               | 1217  | No  | NA  | 0 | 0 | Low-quality    | Genome-fragment | 0.94 | 0     |
| S11_k141_209181                             | 4757  | No  | NA  | 0 | 1 | Not-determined | Genome-fragment | NA   | 0     |
| S11_k141_43504                              | 1737  | No  | NA  | 0 | 0 | Not-determined | Genome-fragment | NA   | 0     |
| S5-final-viral-combined_k141_154951  H2gene | 1217  | No  | NA  | 2 | 0 | Low-quality    | Genome-fragment | 2.97 | 0     |
| S11_k141_43509                              | 1699  | No  | NA  | 0 | 1 | Not-determined | Genome-fragment | NA   | 0     |
| S11_k141_57493                              | 1800  | No  | NA  | 0 | 0 | Not-determined | Genome-fragment | NA   | 0     |
| S11_k141_305507                             | 3402  | No  | NA  | 0 | 2 | Not-determined | Genome-fragment | NA   | 0     |
| S11_k141_85034                              | 1039  | No  | NA  | 0 | 2 | Not-determined | Genome-fragment | NA   | 0     |
| S11_k141_209362                             | 3321  | No  | NA  | 0 | 1 | Not-determined | Genome-fragment | NA   | 0     |
| S7-final-viral-combined_k141_228197  full   | 1217  | No  | NA  | 0 | 1 | Low-quality    | Genome-fragment | 0.72 | 0     |
| S11_k141_2778183                            | 3744  | No  | NA  | 0 | 4 | Not-determined | Genome-fragment | NA   | 0     |
| S11_k141_126326                             | 1028  | No  | NA  | 0 | 1 | Not-determined | Genome-fragment | NA   | 0     |
| S11_k141_195214                             | 1499  | No  | NA  | 0 | 1 | Not-determined | Genome-fragment | NA   | 0     |
| S11_k141_278198                             | 1449  | No  | NA  | 0 | 0 | Not-determined | Genome-fragment | NA   | 0     |
| S11_k141_264171                             | 1365  | No  | NA  | 0 | 0 | Not-determined | Genome-fragment | NA   | 0     |
| S11_k141_57568                              | 1008  | No  | NA  | 0 | 1 | Not-determined | Genome-fragment | NA   | 0     |
| S7-final-viral-combined_k141_50814  full    | 1217  | No  | NA  | 1 | 0 | Low-quality    | Genome-fragment | 3.19 | 0     |
| S11_k141_153822                             | 3123  | No  | NA  | 0 | 0 | Not-determined | Genome-fragment | NA   | 0     |
| S11_k141_29815                              | 4158  | No  | NA  | 0 |   |                |                 |      |       |



|                                               |       |     |    |       |    |                  |                 |    |       |
|-----------------------------------------------|-------|-----|----|-------|----|------------------|-----------------|----|-------|
| S11_k141_319308                               | 3376  | No  | NA | 0     | 1  | Not-determined   | Genome-fragment | NA | 0     |
| S11_k141_154099                               | 1173  | No  | NA | 0     | 1  | Not-determined   | Genome-fragment | NA | 0     |
| S8-final-viral-combined_k141_19941[full]      | 1217  | No  | NA | 2     | 0  | Low-quality      | Genome-fragment | NA | 3.53  |
| S8_k141_195681                                | 1217  | No  | NA | 0     | 0  | Low-quality      | Genome-fragment | NA | 2.1   |
| S11_k141_30058                                | 1017  | No  | NA | 0     | 0  | Not-determined   | Genome-fragment | NA | 0     |
| S11_k141_16241                                | 1120  | No  | NA | 0     | 0  | Not-determined   | Genome-fragment | NA | 0     |
| S11-final-viral-combined_k141_300241[full]    | 1218  | No  | NA | 0     | 0  | Low-quality      | Genome-fragment | NA | 3.92  |
| S11_k141_209642                               | 1295  | No  | NA | 0     | 0  | 1 Not-determined | Genome-fragment | NA | 0     |
| S11_k141_221324                               | 4336  | No  | NA | 0     | 1  | Not-determined   | Genome-fragment | NA | 0     |
| S11_k141_237173                               | 1059  | No  | NA | 0     | 0  | Not-determined   | Genome-fragment | NA | 0     |
| S11_k141_43929                                | 1632  | No  | NA | 0     | 0  | 1 Not-determined | Genome-fragment | NA | 0     |
| S11_k141_221143                               | 1132  | No  | NA | 0     | 1  | Not-determined   | Genome-fragment | NA | 0     |
| S11_k141_57964                                | 1503  | No  | NA | 0     | 0  | 1 Not-determined | Genome-fragment | NA | 0     |
| S11_k141_264378                               | 1757  | No  | NA | 0     | 0  | Not-determined   | Genome-fragment | NA | 0     |
| S11_k141_278558                               | 3324  | No  | NA | 0     | 0  | Not-determined   | Genome-fragment | NA | 0     |
| S11-final-viral-combined_k141_41053[full]     | 1218  | No  | NA | 0     | 1  | Low-quality      | Genome-fragment | NA | 1.6   |
| S11_k141_319376                               | 1456  | No  | NA | 0     | 2  | Not-determined   | Genome-fragment | NA | 0     |
| S16-final-viral-combined_k141_193472[full]    | 1218  | No  | NA | 1     | 0  | Low-quality      | Genome-fragment | NA | 3.7   |
| S11_k141_16237                                | 1769  | No  | NA | 0     | 0  | Not-determined   | Genome-fragment | NA | 0     |
| S11_k141_99393                                | 5795  | No  | NA | 0     | 4  | Not-determined   | Genome-fragment | NA | 0     |
| S11_k141_2797                                 | 1274  | No  | NA | 0     | 0  | 1 Not-determined | Genome-fragment | NA | 0     |
| S11_k141_181594                               | 2659  | No  | NA | 0     | 2  | Not-determined   | Genome-fragment | NA | 0     |
| S11_k141_154329                               | 1922  | No  | NA | 0     | 2  | Not-determined   | Genome-fragment | NA | 0     |
| S11_k141_154330                               | 1094  | No  | NA | 0     | 0  | 1 Not-determined | Genome-fragment | NA | 0     |
| S11_k141_85351                                | 1962  | No  | NA | 0     | 0  | 1 Not-determined | Genome-fragment | NA | 0     |
| S11_k141_140485                               | 1457  | No  | NA | 0     | 0  | Not-determined   | Genome-fragment | NA | 0     |
| S11_k141_223290                               | 1377  | No  | NA | 0     | 0  | 1 Not-determined | Genome-fragment | NA | 0     |
| S1_k141_346203                                | 1218  | No  | NA | 0     | 0  | Low-quality      | Genome-fragment | NA | 2.9   |
| S11_k141_264539                               | 2371  | No  | NA | 0     | 1  | Not-determined   | Genome-fragment | NA | 0     |
| S11_k141_58172                                | 1304  | No  | NA | 0     | 0  | 1 Not-determined | Genome-fragment | NA | 0     |
| S11_k141_44081                                | 1038  | No  | NA | 0     | 0  | 1 Not-determined | Genome-fragment | NA | 0     |
| S11_k141_44095                                | 2471  | No  | NA | 0     | 1  | Not-determined   | Genome-fragment | NA | 0     |
| S11_k141_264583                               | 1023  | No  | NA | 0     | 2  | Not-determined   | Genome-fragment | NA | 0     |
| S7-final-viral-combined_k141_2982[112]gene    | 1218  | No  | NA | 0     | 1  | Low-quality      | Genome-fragment | NA | 0.29  |
| S17-final-viral-combined_k141_179024[full]    | 1218  | No  | NA | 0     | 0  | Low-quality      | Genome-fragment | NA | 2.23  |
| S11_k141_58212                                | 3061  | No  | NA | 0     | 1  | Not-determined   | Genome-fragment | NA | 0     |
| S11_k141_44116                                | 1354  | No  | NA | 0     | 0  | 1 Not-determined | Genome-fragment | NA | 0     |
| S11_k141_168454                               | 2691  | No  | NA | 0     | 0  | Not-determined   | Genome-fragment | NA | 0     |
| S11_k141_291961                               | 6857  | No  | NA | 0     | 6  | Not-determined   | Genome-fragment | NA | 0     |
| S11_k141_223347                               | 5407  | No  | NA | 0     | 3  | Not-determined   | Genome-fragment | NA | 0     |
| S17-final-viral-combined_k141_227022[full]    | 1218  | No  | NA | 3     | 0  | Low-quality      | Genome-fragment | NA | 1.71  |
| S17-final-viral-combined_k141_231452[full]    | 1218  | No  | NA | 0     | 0  | Low-quality      | Genome-fragment | NA | 15.2  |
| S11_k141_71311                                | 1317  | No  | NA | 0     | 0  | Not-determined   | Genome-fragment | NA | 0     |
| S11_k141_154373                               | 2068  | No  | NA | 0     | 1  | Not-determined   | Genome-fragment | NA | 0     |
| S11_k141_2947                                 | 1071  | No  | NA | 0     | 0  | Not-determined   | Genome-fragment | NA | 0     |
| S11_k141_306219                               | 2009  | No  | NA | 0     | 2  | Not-determined   | Genome-fragment | NA | 0     |
| S11_k141_292003                               | 2158  | No  | NA | 0     | 0  | 1 Not-determined | Genome-fragment | NA | 0     |
| S17-final-viral-combined_k141_254342[full]    | 1218  | No  | NA | 0     | 0  | 1 Low-quality    | Genome-fragment | NA | 2.66  |
| S11_k141_237505                               | 1582  | No  | NA | 0     | 1  | Not-determined   | Genome-fragment | NA | 0     |
| S11_k141_16505                                | 1233  | No  | NA | 0     | 0  | Not-determined   | Genome-fragment | NA | 0     |
| S2-final-viral-combined_k141_62558[112]gene   | 1218  | No  | NA | 1     | 0  | Low-quality      | Genome-fragment | NA | 3.93  |
| S11_k141_181710                               | 1646  | No  | NA | 0     | 0  | Not-determined   | Genome-fragment | NA | 0     |
| S11_k141_112724                               | 3824  | No  | NA | 0     | 2  | Not-determined   | Genome-fragment | NA | 0     |
| S11_k141_44247                                | 1681  | No  | NA | 0     | 0  | 1 Not-determined | Genome-fragment | NA | 0     |
| S11_k141_85518                                | 1329  | No  | NA | 0     | 0  | 1 Not-determined | Genome-fragment | NA | 0     |
| S11_k141_30386                                | 1567  | No  | NA | 0     | 0  | 1 Not-determined | Genome-fragment | NA | 0     |
| S11_k141_223450                               | 2771  | No  | NA | 0     | 0  | 1 Not-determined | Genome-fragment | NA | 0     |
| S11_k141_168612                               | 1111  | No  | NA | 0     | 0  | 1 Not-determined | Genome-fragment | NA | 0     |
| S11_k141_140666                               | 1089  | No  | NA | 0     | 0  | 1 Not-determined | Genome-fragment | NA | 0     |
| S11_k141_3034                                 | 3115  | No  | NA | 0     | 0  | Not-determined   | Genome-fragment | NA | 0     |
| S11_k141_319535                               | 3696  | No  | NA | 0     | 0  | 1 Not-determined | Genome-fragment | NA | 0     |
| S4-final-viral-combined_k141_160754[full]     | 1218  | No  | NA | 0     | 1  | Low-quality      | Genome-fragment | NA | 1     |
| S11_k141_168651                               | 1122  | No  | NA | 0     | 2  | Not-determined   | Genome-fragment | NA | 0     |
| S11_k141_210060                               | 3461  | No  | NA | 0     | 1  | Not-determined   | Genome-fragment | NA | 0     |
| S8-final-viral-combined_k141_198167[full]     | 1218  | No  | NA | 0     | 1  | Low-quality      | Genome-fragment | NA | 1.19  |
| S11_k141_159720                               | 1373  | No  | NA | 0     | 0  | Not-determined   | Genome-fragment | NA | 0     |
| S11_k141_154513                               | 1003  | No  | NA | 0     | 0  | Not-determined   | Genome-fragment | NA | 0     |
| S8-final-viral-combined_k141_238020[full]     | 1218  | No  | NA | 0     | 0  | Low-quality      | Genome-fragment | NA | 2.77  |
| S8-final-viral-combined_k141_201046[full]     | 1218  | No  | NA | 0     | 2  | Low-quality      | Genome-fragment | NA | 1.06  |
| S11_k141_112808                               | 15664 | No  | NA | 0     | 10 | Not-determined   | Genome-fragment | NA | 0     |
| S8-final-viral-combined_k141_223139[112]gene  | 1218  | Yes | NA | 617   | 1  | 1 Low-quality    | Genome-fragment | NA | 0.97  |
| S11_k141_306479                               | 1338  | No  | NA | 0     | 0  | Not-determined   | Genome-fragment | NA | 49.34 |
| S11_k141_168694                               | 1533  | No  | NA | 0     | 0  | Not-determined   | Genome-fragment | NA | 0     |
| S11_k141_278950                               | 5061  | No  | NA | 0     | 0  | 1 Not-determined | Genome-fragment | NA | 0     |
| S11_k141_154482                               | 1290  | No  | NA | 0     | 0  | 2 Not-determined | Genome-fragment | NA | 0     |
| S9-final-viral-combined_k141_11266[full]      | 1219  | No  | NA | 1     | 0  | Low-quality      | Genome-fragment | NA | 3.09  |
| S11_k141_112976                               | 1013  | No  | NA | 0     | 2  | Not-determined   | Genome-fragment | NA | 0     |
| S11_k141_154748                               | 6306  | No  | NA | 0     | 12 | Not-determined   | Genome-fragment | NA | 0     |
| S11_k141_155808                               | 4951  | No  | NA | 0     | 2  | Not-determined   | Genome-fragment | NA | 0     |
| S11_k141_210187                               | 3650  | No  | NA | 0     | 0  | 1 Not-determined | Genome-fragment | NA | 0     |
| S11_k141_3116                                 | 38537 | Yes | NA | 31746 | 12 | 4 Medium-quality | Genome-fragment | NA | 88.7  |
| S11_k141_30609                                | 1078  | No  | NA | 0     | 0  | Not-determined   | Genome-fragment | NA | 17.62 |
| S9_k141_91796                                 | 1219  | No  | NA | 0     | 0  | Low-quality      | Genome-fragment | NA | 1.63  |
| S11_k141_251106                               | 1058  | No  | NA | 0     | 0  | 1 Not-determined | Genome-fragment | NA | 0     |
| S11_k141_182093                               | 8205  | No  | NA | 0     | 0  | Not-determined   | Genome-fragment | NA | 0     |
| S11_k141_44351                                | 2276  | No  | NA | 0     | 2  | Not-determined   | Genome-fragment | NA | 0     |
| S11_k141_251140                               | 1083  | No  | NA | 0     | 0  | 1 Not-determined | Genome-fragment | NA | 0     |
| S11_k141_30653                                | 3047  | No  | NA | 0     | 2  | Not-determined   | Genome-fragment | NA | 0     |
| S11_k141_155898                               | 1057  | No  | NA | 0     | 0  | Not-determined   | Genome-fragment | NA | 0     |
| S11_k141_71644                                | 1257  | No  | NA | 0     | 0  | Not-determined   | Genome-fragment | NA | 0     |
| S11_k141_127188                               | 1269  | No  | NA | 0     | 0  | 1 Not-determined | Genome-fragment | NA | 0     |
| S11_k141_279117                               | 5563  | No  | NA | 0     | 0  | 1 Not-determined | Genome-fragment | NA | 0     |
| S11_k141_3241                                 | 1081  | No  | NA | 0     | 0  | Not-determined   | Genome-fragment | NA | 0     |
| S11_k141_58605                                | 1034  | No  | NA | 0     | 0  | Not-determined   | Genome-fragment | NA | 0     |
| S11_k141_279202                               | 1741  | No  | NA | 0     | 0  | Not-determined   | Genome-fragment | NA | 0     |
| S11-final-viral-combined_k141_80519[full]     | 1219  | No  | NA | 0     | 0  | Low-quality      | Genome-fragment | NA | 0.92  |
| S11_k141_210218                               | 3456  | No  | NA | 0     | 0  | 1 Not-determined | Genome-fragment | NA | 0     |
| S11_k141_251212                               | 1117  | No  | NA | 0     | 0  | 1 Not-determined | Genome-fragment | NA | 0     |
| S11_k141_58638                                | 1731  | No  | NA | 0     | 0  | Not-determined   | Genome-fragment | NA | 0     |
| S11_k141_85898                                | 4738  | No  | NA | 0     | 0  | Not-determined   | Genome-fragment | NA | 0     |
| S11_k141_265092                               | 1390  | No  | NA | 0     | 0  | 2 Not-determined | Genome-fragment | NA | 0     |
| S11_k141_210222                               | 3775  | No  | NA | 0     | 0  | 2 Not-determined | Genome-fragment | NA | 0     |
| S11_k141_265104                               | 6150  | No  | NA | 0     | 0  | Not-determined   | Genome-fragment | NA | 0     |
| S11_k141_182252                               | 1829  | No  | NA | 0     | 0  | 2 Not-determined | Genome-fragment | NA | 0     |
| S11_k141_30639                                | 1347  | No  | NA | 0     | 0  | 1 Not-determined | Genome-fragment | NA | 0     |
| S11_k141_154887                               | 1187  | No  | NA | 0     | 0  | Not-determined   | Genome-fragment | NA | 0     |
| S11_k141_223884                               | 3636  | No  | NA | 0     | 0  | 3 Not-determined | Genome-fragment | NA | 0     |
| S11_k141_16953                                | 2819  | No  | NA | 0     | 0  | Not-determined   | Genome-fragment | NA | 0     |
| S11-final-viral-combined_k141_173797[112]gene | 1219  | No  | NA | 0     | 0  | Low-quality      | Genome-fragment | NA | 3.3   |
| S11_k141_154938                               | 2514  | No  | NA | 0     | 0  | Not-determined   | Genome-fragment | NA | 0     |
| S11_k141_265167                               | 3571  | No  | NA | 0     | 2  | Not-determined   | Genome-fragment | NA | 0     |
| S11_k141_319945                               | 1791  | No  | NA | 0     | 0  | Not-determined   | Genome-fragment | NA | 0     |
| S11_k141_141104                               | 1304  | No  | NA | 0     | 0  | 1 Not-determined | Genome-fragment | NA | 0     |
| S11_k141_231620                               | 1219  | No  | NA | 0     | 0  | Low-quality      | Genome-fragment | NA | 2.04  |
| S11_k141_279354                               | 1093  | No  | NA | 0     | 0  | 1 Not-determined | Genome-fragment | NA | 0     |
| S11_k141_113146                               | 5316  | No  | NA | 0     | 0  | Not-determined   | Genome-fragment | NA | 0     |
| S1_k141_186486                                | 1219  | No  | NA | 0     | 2  | Low-quality      | Genome-fragment | NA | 0.36  |
| S11_k141_319980                               | 1267  | No  | NA | 0     | 0  | 1 Not-determined | Genome-fragment | NA | 0     |
| S11_k141_319990                               | 2451  | No  | NA | 0     | 0  | Not-determined   | Genome-fragment | NA | 0     |
| S11_k141_292421                               | 6384  | No  | NA | 0     | 0  | 1 Not-determined | Genome-fragment | NA | 0     |
| S5-final-viral-combined_k141_202004[full]     | 1219  | No  | NA | 0     | 2  | Low-quality      | Genome-fragment | NA | 0.81  |
| S11_k141_210374                               | 1060  | No  | NA | 0     | 0  | Not-determined   | Genome-fragment | NA | 0     |
| S5-final-viral-combined_k141_102114[112]gene  | 1219  | No  | NA | 1     | 0  | Low-quality      | Genome-fragment | NA | 3.06  |
| S11_k141_58743                                | 1063  | No  | NA | 0     | 0  | Not-determined   | Genome-fragment | NA | 0     |
| S11_k141_36123                                | 1750  | No  | NA | 0     | 0  | 1 Not-determined | Genome-fragment | NA | 0     |
| S5-final-viral-combined_k141_129123[112]gene  | 1219  | No  | NA | 1     | 0  | Low-quality      | Genome-fragment | NA | 2.78  |
| S12-final-viral-combined_k141_352593[full]    | 1219  | No  | NA | 0     | 0  | 1 Low-quality    | Genome-fragment | NA | 1.42  |
| S11_k141_292520                               | 3131  | No  | NA | 0     | 0  | Not-determined   | Genome-fragment | NA | 0     |
| S11_k141_30972                                | 1261  | No  | NA | 0     | 0  | 1 Not-determined | Genome-fragment | NA | 0     |
| S12-final-viral-combined_k141_173829[112]gene | 1219  | No  | NA | 1     | 0  | Low-quality      | Genome-fragment | NA | 2.9   |
| S11_k141_86198                                | 1026  | No  | NA | 0     | 0  | Not-determined   | Genome-fragment | NA | 0     |
| S2_k141_247288                                | 1219  | No  | NA | 0     | 0  | Low-quality      | Genome-fragment | NA | 2.94  |
| S11_k141_155154                               | 1071  | No  | NA | 0     | 0  | Not-determined   | Genome-fragment | NA | 0     |
| S11_k141_279460                               | 1069  | No  | NA | 0     | 3  | Not-determined   | Genome-fragment | NA | 0     |
| S11_k141_361310                               | 2719  | No  | NA | 0     | 2  | Not-determined   | Genome-fragment | NA | 0     |
| S6_k141_23701                                 | 1219  | No  | NA | 0     | 0  | Low-quality      | Genome-fragment | NA | 3.6   |
| S11_k141_113322                               | 4061  | No  | NA | 0     | 0  | Not-determined   | Genome-fragment | NA | 0     |
| S11_k141_196153                               | 1310  | No  | NA | 0     | 0  | Not-determined   | Genome-fragment | NA | 0     |
| S11_k141_141303                               | 1307  | No  | NA | 0     | 0  | 1 Not-determined | Genome-fragment | NA | 0     |
| S11_k141_251462                               | 7019  | No  | NA | 0     | 7  | Not-determined   | Genome-fragment | NA | 0     |
| S8-final-viral-combined_k141_201964[full]     | 1219  | No  | NA | 0     | 1  | Low-quality      | Genome-fragment | NA | 0.83  |
| S11_k141_31076                                | 1162  | No  | NA | 0     | 0  | 1 Not-determined | Genome-fragment | NA | 0     |
| S11_k141_58900                                | 3738  | No  | NA | 0     | 0  | 1 Not-determined | Genome-fragment | NA | 0     |
| S11_k141_320258                               | 3012  | No  | NA | 0     | 0  | 1 Not-determined | Genome-fragment | NA |       |



|                                      |          |       |     |    |     |   |                |                 |                 |    |   |
|--------------------------------------|----------|-------|-----|----|-----|---|----------------|-----------------|-----------------|----|---|
| S11_k41_320555                       |          | 31066 | No  | NA | 11  | 1 | Medium-quality | Genome-fragment | 60.9            | 0  |   |
| S11_k41_211099                       |          | 4665  | No  | NA | 0   | 1 | Not-determined | Genome-fragment | NA              | 0  |   |
| S11_k41_205652                       |          | 3153  | No  | NA | 0   | 2 | Not-determined | Genome-fragment | NA              | 0  |   |
| S11_k41_31428                        |          | 1027  | No  | NA | 0   | 0 | Not-determined | Genome-fragment | NA              | 0  |   |
| S8-final-viral-combined_k141_93421   | [full]   | 1220  | No  | NA | 0   | 0 | Low-quality    | Genome-fragment | NA              | 0  |   |
| S11_k41_155622                       |          | 1815  | No  | NA | 0   | 4 | Not-determined | Genome-fragment | NA              | 0  |   |
| S9-final-viral-combined_k141_83714   | [full]   | 1221  | No  | NA | 0   | 0 | Low-quality    | Genome-fragment | NA              | 0  |   |
| S11_k41_127920                       |          | 3011  | No  | NA | 0   | 1 | Not-determined | Genome-fragment | NA              | 0  |   |
| S11-final-viral-combined_k141_21893  | [full]   | 1221  | No  | NA | 0   | 0 | Low-quality    | Genome-fragment | NA              | 0  |   |
| S11_k41_3906                         |          | 1309  | No  | NA | 0   | 1 | Not-determined | Genome-fragment | NA              | 0  |   |
| S11_k41_141799                       |          | 2136  | No  | NA | 0   | 1 | Not-determined | Genome-fragment | NA              | 0  |   |
| S11_k41_155670                       |          | 1614  | No  | NA | 0   | 1 | Not-determined | Genome-fragment | NA              | 0  |   |
| S11_k41_72396                        |          | 3201  | No  | NA | 0   | 2 | Not-determined | Genome-fragment | NA              | 0  |   |
| S11-final-viral-combined_k141_313619 | [H2gene] | 1221  | No  | NA | 1   | 0 | Low-quality    | Genome-fragment | NA              | 0  |   |
| S11_k41_265796                       |          | 4641  | No  | NA | 0   | 6 | Not-determined | Genome-fragment | NA              | 0  |   |
| S11_k41_19787                        |          | 1221  | No  | NA | 0   | 1 | Low-quality    | Genome-fragment | NA              | 0  |   |
| S1-final-viral-combined_k141_39209   | [full]   | 1221  | No  | NA | 1   | 0 | Low-quality    | Genome-fragment | NA              | 0  |   |
| S1-final-viral-combined_k141_174326  | [full]   | 1221  | No  | NA | 0   | 0 | Low-quality    | Genome-fragment | NA              | 0  |   |
| S1-final-viral-combined_k141_201352  | [H2gene] | 1221  | No  | NA | 0   | 1 | Low-quality    | Genome-fragment | NA              | 0  |   |
| S11_k41_87006                        |          | 2723  | No  | NA | 0   | 2 | Not-determined | Genome-fragment | NA              | 0  |   |
| S1_k41_300402                        |          | 1221  | No  | NA | 2   | 0 | Low-quality    | Genome-fragment | NA              | 0  |   |
| S11_k41_141895                       |          | 1029  | No  | NA | 0   | 1 | Not-determined | Genome-fragment | NA              | 0  |   |
| S11_k41_252028                       |          | 1718  | No  | NA | 0   | 1 | Not-determined | Genome-fragment | NA              | 0  |   |
| S11_k41_265877                       |          | 1001  | No  | NA | 0   | 1 | Not-determined | Genome-fragment | NA              | 0  |   |
| S11_k41_211356                       |          | 2508  | No  | NA | 0   | 0 | Not-determined | Genome-fragment | NA              | 0  |   |
| S11_k41_214654                       |          | 1951  | No  | NA | 0   | 1 | Not-determined | Genome-fragment | NA              | 0  |   |
| S11_k41_211370                       |          | 1906  | No  | NA | 0   | 1 | Not-determined | Genome-fragment | NA              | 0  |   |
| S11_k41_169920                       |          | 2932  | No  | NA | 0   | 2 | Not-determined | Genome-fragment | NA              | 0  |   |
| S11_k41_224785                       |          | 1590  | No  | NA | 0   | 1 | Not-determined | Genome-fragment | NA              | 0  |   |
| S11_k41_183224                       |          | 1460  | No  | NA | 0   | 1 | Not-determined | Genome-fragment | NA              | 0  |   |
| S7-final-viral-combined_k141_2625    | [full]   | 1221  | No  | NA | 1   | 0 | Low-quality    | Genome-fragment | NA              | 0  |   |
| S11_k41_4026                         |          | 1113  | No  | NA | 0   | 0 | Not-determined | Genome-fragment | NA              | 0  |   |
| S7-final-viral-combined_k141_157950  | [full]   | 1221  | No  | NA | 0   | 0 | Low-quality    | Genome-fragment | NA              | 0  |   |
| S11_k41_100981                       |          | 1049  | No  | NA | 0   | 1 | Not-determined | Genome-fragment | NA              | 0  |   |
| S7_k41_188805                        |          | 1221  | No  | NA | 0   | 0 | Low-quality    | Genome-fragment | NA              | 0  |   |
| S11_k41_151745                       |          | 1688  | No  | NA | 0   | 2 | Not-determined | Genome-fragment | NA              | 0  |   |
| S12-final-viral-combined_k141_200672 | [H2gene] | 1221  | No  | NA | 1   | 0 | Low-quality    | Genome-fragment | NA              | 0  |   |
| S11_k41_307602                       |          | 3067  | No  | NA | 0   | 2 | Not-determined | Genome-fragment | NA              | 0  |   |
| S11_k41_169996                       |          | 2388  | No  | NA | 0   | 1 | Not-determined | Genome-fragment | NA              | 0  |   |
| S11_k41_252146                       |          | 3010  | No  | NA | 0   | 0 | Not-determined | Genome-fragment | NA              | 0  |   |
| S11_k41_252148                       |          | 5297  | No  | NA | 0   | 0 | Not-determined | Genome-fragment | NA              | 0  |   |
| S12_k41_252223                       |          | 1221  | No  | NA | 0   | 0 | Low-quality    | Genome-fragment | NA              | 0  |   |
| S11_k41_31644                        |          | 1019  | No  | NA | 0   | 0 | Not-determined | Genome-fragment | NA              | 0  |   |
| S11_k41_320738                       |          | 1430  | No  | NA | 0   | 1 | Not-determined | Genome-fragment | NA              | 0  |   |
| S11_k41_155790                       |          | 1856  | No  | NA | 0   | 2 | Not-determined | Genome-fragment | NA              | 0  |   |
| S4_k41_13533                         |          | 1221  | No  | NA | 0   | 0 | Low-quality    | Genome-fragment | NA              | 0  |   |
| S11_k41_238874                       |          | 1573  | No  | NA | 0   | 2 | Not-determined | Genome-fragment | NA              | 0  |   |
| S9-final-viral-combined_k141_32868   | [H2gene] | 1222  | No  | NA | 1   | 0 | Low-quality    | Genome-fragment | NA              | 0  |   |
| S11_k41_252222                       |          | 4512  | No  | NA | 0   | 2 | Not-determined | Genome-fragment | NA              | 0  |   |
| S11_k41_142080                       |          | 1832  | No  | NA | 0   | 0 | Not-determined | Genome-fragment | NA              | 0  |   |
| S11-final-viral-combined_k141_302966 | [full]   | 1222  | Yes | NA | 727 | 1 | 1              | Low-quality     | Genome-fragment | NA | 0 |
| S12-final-viral-combined_k141_46804  | [H2gene] | 1222  | No  | NA | 0   | 0 | Low-quality    | Genome-fragment | NA              | 0  |   |
| S11_k41_252272                       |          | 4954  | No  | NA | 0   | 5 | Not-determined | Genome-fragment | NA              | 0  |   |
| S11_k41_101057                       |          | 1713  | No  | NA | 0   | 1 | Not-determined | Genome-fragment | NA              | 0  |   |
| S11_k41_97265                        |          | 1442  | No  | NA | 0   | 1 | Not-determined | Genome-fragment | NA              | 0  |   |
| S11_k41_206138                       |          | 1289  | No  | NA | 0   | 0 | Not-determined | Genome-fragment | NA              | 0  |   |
| S11-final-viral-combined_k141_200031 | [H2gene] | 1222  | No  | NA | 1   | 0 | Low-quality    | Genome-fragment | NA              | 0  |   |
| S1-final-viral-combined_k141_246721  | [full]   | 1222  | No  | NA | 0   | 1 | Low-quality    | Genome-fragment | NA              | 0  |   |
| S11_k41_101116                       |          | 2240  | No  | NA | 0   | 0 | Not-determined | Genome-fragment | NA              | 0  |   |
| S11_k41_72605                        |          | 1190  | No  | NA | 0   | 0 | Not-determined | Genome-fragment | NA              | 0  |   |
| S11_k41_87293                        |          | 37508 | No  | NA | 10  | 0 | Complete       | High-quality    | Genome-fragment | NA | 0 |
| S11_k41_150660                       |          | 3319  | No  | NA | 0   | 2 | Not-determined | Genome-fragment | NA              | 0  |   |
| S11_k41_280452                       |          | 1134  | No  | NA | 0   | 1 | Not-determined | Genome-fragment | NA              | 0  |   |
| S11_k41_87300                        |          | 1186  | No  | NA | 0   | 0 | Not-determined | Genome-fragment | NA              | 0  |   |
| S11_k41_264247                       |          | 1079  | No  | NA | 0   | 2 | Not-determined | Genome-fragment | NA              | 0  |   |
| S8_k41_9753                          |          | 1222  | No  | NA | 0   | 0 | Low-quality    | Genome-fragment | NA              | 0  |   |
| S11_k41_266315                       |          | 2193  | No  | NA | 0   | 1 | Not-determined | Genome-fragment | NA              | 0  |   |
| S11_k41_211662                       |          | 1182  | No  | NA | 0   | 0 | Not-determined | Genome-fragment | NA              | 0  |   |
| S11_k41_31865                        |          | 3709  | No  | NA | 0   | 0 | Not-determined | Genome-fragment | NA              | 0  |   |
| S11_k41_266343                       |          | 1497  | No  | NA | 0   | 2 | Not-determined | Genome-fragment | NA              | 0  |   |
| S12-final-viral-combined_k141_326325 | [full]   | 1222  | No  | NA | 0   | 0 | Low-quality    | Genome-fragment | NA              | 0  |   |
| S11_k41_266396                       |          | 3009  | No  | NA | 0   | 1 | Not-determined | Genome-fragment | NA              | 0  |   |
| S11_k41_45976                        |          | 1036  | No  | NA | 0   | 1 | Not-determined | Genome-fragment | NA              | 0  |   |
| S11_k41_320969                       |          | 1452  | No  | NA | 0   | 1 | Not-determined | Genome-fragment | NA              | 0  |   |
| S11_k41_174221                       |          | 1086  | No  | NA | 0   | 1 | Not-determined | Genome-fragment | NA              | 0  |   |
| S12-final-viral-combined_k141_82962  | [full]   | 1222  | No  | NA | 0   | 0 | Low-quality    | Genome-fragment | NA              | 0  |   |
| S11_k41_183640                       |          | 1671  | No  | NA | 0   | 2 | Not-determined | Genome-fragment | NA              | 0  |   |
| S12_k41_36236                        |          | 1222  | No  | NA | 0   | 0 | Low-quality    | Genome-fragment | NA              | 0  |   |
| S11_k41_183899                       |          | 2495  | No  | NA | 0   | 0 | Not-determined | Genome-fragment | NA              | 0  |   |
| S11_k41_87374                        |          | 1206  | No  | NA | 0   | 1 | Not-determined | Genome-fragment | NA              | 0  |   |
| S11_k41_183717                       |          | 1219  | No  | NA | 0   | 2 | Not-determined | Genome-fragment | NA              | 0  |   |
| S4-final-viral-combined_k141_133668  | [H2gene] | 1222  | No  | NA | 1   | 0 | Low-quality    | Genome-fragment | NA              | 0  |   |
| S11_k41_46106                        |          | 2136  | No  | NA | 0   | 4 | Not-determined | Genome-fragment | NA              | 0  |   |
| S11_k41_4475                         |          | 1968  | No  | NA | 0   | 2 | Not-determined | Genome-fragment | NA              | 0  |   |
| S11_k41_128477                       |          | 3377  | No  | NA | 0   | 2 | Not-determined | Genome-fragment | NA              | 0  |   |
| S11_k41_225246                       |          | 1037  | No  | NA | 0   | 0 | Not-determined | Genome-fragment | NA              | 0  |   |
| S11_k41_4510                         |          | 1051  | No  | NA | 0   | 1 | Not-determined | Genome-fragment | NA              | 0  |   |
| S11_k41_4545                         |          | 1280  | No  | NA | 0   | 1 | Not-determined | Genome-fragment | NA              | 0  |   |
| S4_k41_37182                         |          | 1222  | No  | NA | 1   | 0 | Low-quality    | Genome-fragment | NA              | 0  |   |
| S11_k41_156190                       |          | 1146  | No  | NA | 0   | 0 | Not-determined | Genome-fragment | NA              | 0  |   |
| S11_k41_183803                       |          | 3487  | No  | NA | 0   | 3 | Not-determined | Genome-fragment | NA              | 0  |   |
| S11_k41_31131                        |          | 1085  | No  | NA | 0   | 0 | Not-determined | Genome-fragment | NA              | 0  |   |
| S11_k41_170443                       |          | 4149  | No  | NA | 0   | 2 | Not-determined | Genome-fragment | NA              | 0  |   |
| S8-final-viral-combined_k141_54260   | [full]   | 1222  | No  | NA | 0   | 0 | Low-quality    | Genome-fragment | NA              | 0  |   |
| S11_k41_321171                       |          | 1051  | No  | NA | 0   | 2 | Not-determined | Genome-fragment | NA              | 0  |   |
| S11_k41_46222                        |          | 1051  | No  | NA | 0   | 0 | Not-determined | Genome-fragment | NA              | 0  |   |
| S11_k41_225393                       |          | 1104  | No  | NA | 0   | 1 | Not-determined | Genome-fragment | NA              | 0  |   |
| S11_k41_183845                       |          | 4229  | No  | NA | 0   | 0 | Not-determined | Genome-fragment | NA              | 0  |   |
| S8_k41_166767                        |          | 1222  | No  | NA | 0   | 1 | Low-quality    | Genome-fragment | NA              | 0  |   |
| S11_k41_239363                       |          | 3153  | No  | NA | 0   | 3 | Not-determined | Genome-fragment | NA              | 0  |   |
| S11-final-viral-combined_k141_305022 | [full]   | 1223  | No  | NA | 0   | 0 | Low-quality    | Genome-fragment | NA              | 0  |   |
| S11-final-viral-combined_k141_23152  | [H2gene] | 1223  | No  | NA | 0   | 0 | Low-quality    | Genome-fragment | NA              | 0  |   |
| S11_k41_170502                       |          | 1590  | No  | NA | 0   | 1 | Not-determined | Genome-fragment | NA              | 0  |   |
| S11_k41_128609                       |          | 1260  | No  | NA | 0   | 1 | Not-determined | Genome-fragment | NA              | 0  |   |
| S11_k41_164841                       |          | 1213  | No  | NA | 0   | 0 | Low-quality    | Genome-fragment | NA              | 0  |   |
| S11_k41_114260                       |          | 3455  | No  | NA | 0   | 2 | Not-determined | Genome-fragment | NA              | 0  |   |
| S11_k41_308167                       |          | 3771  | No  | NA | 0   | 3 | Not-determined | Genome-fragment | NA              | 0  |   |
| S11_k41_321198                       |          | 1508  | No  | NA | 0   | 1 | Not-determined | Genome-fragment | NA              | 0  |   |
| S11_k41_114275                       |          | 6262  | No  | NA | 0   | 1 | Not-determined | Genome-fragment | NA              | 0  |   |
| S5-final-viral-combined_k141_207620  | [full]   | 1223  | No  | NA | 0   | 0 | Low-quality    | Genome-fragment | NA              | 0  |   |
| S11_k41_225481                       |          | 3302  | No  | NA | 0   | 3 | Not-determined | Genome-fragment | NA              | 0  |   |
| S11_k41_183913                       |          | 1565  | No  | NA | 0   | 1 | Not-determined | Genome-fragment | NA              | 0  |   |
| S11_k41_142460                       |          | 3076  | No  | NA | 0   | 2 | Not-determined | Genome-fragment | NA              | 0  |   |
| S11_k41_4688                         |          | 1683  | No  | NA | 0   | 0 | Not-determined | Genome-fragment | NA              | 0  |   |
| S11_k41_252777                       |          | 1200  | No  | NA | 0   | 2 | Not-determined | Genome-fragment | NA              | 0  |   |
| S11_k41_142680                       |          | 1844  | No  | NA | 0   | 0 | Not-determined | Genome-fragment | NA              | 0  |   |
| S12-final-viral-combined_k141_184160 | [full]   | 1223  | No  | NA | 0   | 0 | Low-quality    | Genome-fragment | NA              | 0  |   |
| S11_k41_142681                       |          | 3539  | No  | NA | 0   | 0 | Not-determined | Genome-fragment | NA              | 0  |   |
| S12-final-viral-combined_k141_294318 | [full]   | 1223  | No  | NA | 1   | 0 | Low-quality    | Genome-fragment | NA              | 0  |   |
| S11_k41_239475                       |          | 1145  | No  | NA | 0   | 0 | Not-determined | Genome-fragment | NA              | 0  |   |
| S11_k41_18045                        |          | 1513  | No  | NA | 0   | 0 | Not-determined | Genome-fragment | NA              | 0  |   |
| S11_k41_141705                       |          | 1219  | No  | NA | 0   | 2 | Not-determined | Genome-fragment | NA              | 0  |   |
| S11_k41_321349                       |          | 1090  | No  | NA | 0   | 1 | Not-determined | Genome-fragment | NA              | 0  |   |
| S11_k41_294099                       |          | 1453  | No  | NA | 0   | 1 | Not-determined | Genome-fragment | NA              | 0  |   |
| S12-final-viral-combined_k141_77365  | [full]   | 1223  | No  | NA | 0   | 0 | Low-quality    | Genome-fragment | NA              | 0  |   |
| S2-final-viral-combined_k141_211108  | [full]   | 1223  | No  | NA | 0   | 0 | Low-quality    | Genome-fragment | NA              | 0  |   |
| S11_k41_197417                       |          | 1107  | No  | NA | 0   | 0 | Not-determined | Genome-fragment | NA              | 0  |   |
| S11_k41_252896                       |          | 1101  | No  | NA | 0   | 0 | Not-determined | Genome-fragment | NA              | 0  |   |
| S11_k41_215596                       |          | 1673  | No  | NA | 0   | 0 | Not-determined | Genome-fragment | NA              | 0  |   |
| S11_k41_321378                       |          | 1395  | No  | NA | 0   | 1 | Not-determined | Genome-fragment | NA              | 0  |   |
| S11_k41_294125                       |          | 1420  | No  | NA | 0   | 1 | Not-determined | Genome-fragment | NA              | 0  |   |
| S2-final-viral-combined_k141_179439  | [H2gene] | 1223  | No  | NA | 0   | 0 | Low-quality    | Genome-fragment | NA              | 0  |   |
| S11_k41_156492                       |          | 1498  | No  | NA | 0   | 1 | Not-determined | Genome-fragment | NA              | 0  |   |
| S11_k41_183997                       |          | 1568  | No  | NA | 0   | 1 | Not-determined | Genome-fragment | NA              | 0  |   |
| S4_k41_153718                        |          | 1213  | No  | NA | 1   | 0 | Low-quality    | Genome-fragment | NA              | 0  |   |
| S11_k41_114533                       |          | 2678  | No  | NA | 0   | 0 | Not-determined | Genome-fragment | NA              | 0  |   |
| S11_k41_18130                        |          | 1055  | No  | NA | 0   | 1 | Not-determined | Genome-fragment | NA              | 0  |   |
| S11_k41_324148                       |          | 2610  | No  | NA | 0   | 0 | Not-determined | Genome-fragment | NA              | 0  |   |
| S11_k41_197501                       |          | 1104  | No  | NA | 0   | 1 | Not-determined | Genome-fragment | NA              | 0  |   |
| S11_k41_142842                       |          | 4890  | No  | NA | 0   | 2 | Not-determined | Genome-fragment | NA              | 0  |   |



|                                             |       |    |    |   |   |                |                 |    |       |
|---------------------------------------------|-------|----|----|---|---|----------------|-----------------|----|-------|
| S11_k141_294430                             | 1953  | No | NA | 0 | 1 | Not-determined | Genome-fragment | NA | 0     |
| S11_k141_308059                             | 3793  | No | NA | 0 | 1 | Not-determined | Genome-fragment | NA | 0     |
| S11_k141_156721                             | 1036  | No | NA | 0 | 1 | Not-determined | Genome-fragment | NA | 0     |
| S11_k141_197822                             | 1035  | No | NA | 0 | 0 | Not-determined | Genome-fragment | NA | 0     |
| S11_k141_308703                             | 2105  | No | NA | 0 | 0 | Not-determined | Genome-fragment | NA | 0     |
| S11_k141_31091                              | 15581 | No | NA | 1 | 1 | Medium-quality | Genome-fragment | NA | 70.25 |
| S11_k141_308724                             | 1366  | No | NA | 0 | 1 | Not-determined | Genome-fragment | NA | 0     |
| S2-final-viral-combined_k141_140603  full   | 1224  | No | NA | 4 | 0 | Low-quality    | Genome-fragment | NA | 2.28  |
| S11_k141_31727                              | 1411  | No | NA | 0 | 1 | Not-determined | Genome-fragment | NA | 0     |
| S11_k141_281617                             | 1419  | No | NA | 0 | 1 | Not-determined | Genome-fragment | NA | 0     |
| S11_k141_129201                             | 1070  | No | NA | 0 | 1 | Not-determined | Genome-fragment | NA | 0     |
| S6_k141_57252                               | 1224  | No | NA | 0 | 0 | Low-quality    | Genome-fragment | NA | 1.45  |
| S11_k141_212577                             | 3105  | No | NA | 0 | 2 | Not-determined | Genome-fragment | NA | 0     |
| S11_k141_18554                              | 1010  | No | NA | 0 | 2 | Not-determined | Genome-fragment | NA | 0     |
| S11_k141_88119                              | 1496  | No | NA | 0 | 1 | Not-determined | Genome-fragment | NA | 0     |
| S11_k141_5122                               | 5412  | No | NA | 0 | 4 | Not-determined | Genome-fragment | NA | 0     |
| S11_k141_32788                              | 1488  | No | NA | 0 | 2 | Not-determined | Genome-fragment | NA | 0     |
| S11_k141_184366                             | 1541  | No | NA | 0 | 1 | Not-determined | Genome-fragment | NA | 0     |
| S11_k141_240138                             | 8458  | No | NA | 0 | 2 | Not-determined | Genome-fragment | NA | 0     |
| S11_k141_60538                              | 1124  | No | NA | 0 | 0 | Not-determined | Genome-fragment | NA | 0     |
| S8_k141_83765                               | 1224  | No | NA | 0 | 0 | Low-quality    | Genome-fragment | NA | 0.87  |
| S11_k141_154845                             | 1662  | No | NA | 0 | 0 | Not-determined | Genome-fragment | NA | 0     |
| S11_k141_143274                             | 1338  | No | NA | 0 | 1 | Not-determined | Genome-fragment | NA | 0     |
| S11-final-viral-combined_k141_176248  full  | 1225  | No | NA | 0 | 0 | Low-quality    | Genome-fragment | NA | 0.95  |
| S11_k141_102357                             | 7962  | No | NA | 0 | 1 | Not-determined | Genome-fragment | NA | 0     |
| S3_k141_97369                               | 1225  | No | NA | 0 | 0 | Low-quality    | Genome-fragment | NA | 2.13  |
| S11_k141_226077                             | 2750  | No | NA | 0 | 0 | Not-determined | Genome-fragment | NA | 0     |
| S11_k141_198020                             | 1369  | No | NA | 0 | 1 | Not-determined | Genome-fragment | NA | 0     |
| S12_k141_246324                             | 1225  | No | NA | 0 | 0 | Low-quality    | Genome-fragment | NA | 3.04  |
| S4_k141_29360                               | 1225  | No | NA | 0 | 1 | Low-quality    | Genome-fragment | NA | 0.66  |
| S11_k141_102416                             | 2974  | No | NA | 0 | 0 | Not-determined | Genome-fragment | NA | 0     |
| S11_k141_321756                             | 1083  | No | NA | 0 | 1 | Not-determined | Genome-fragment | NA | 0     |
| S6-final-viral-combined_k141_32751  full    | 1225  | No | NA | 4 | 0 | Low-quality    | Genome-fragment | NA | 2.67  |
| S11_k141_102437                             | 3217  | No | NA | 0 | 3 | Not-determined | Genome-fragment | NA | 0     |
| S11_k141_253455                             | 1372  | No | NA | 0 | 2 | Not-determined | Genome-fragment | NA | 0     |
| S6-final-viral-combined_k141_128555  full   | 1225  | No | NA | 0 | 0 | Low-quality    | Genome-fragment | NA | 2.59  |
| S11_k141_32975                              | 1165  | No | NA | 0 | 1 | Not-determined | Genome-fragment | NA | 0     |
| S11_k141_171112                             | 4208  | No | NA | 0 | 2 | Not-determined | Genome-fragment | NA | 0     |
| S11_k141_320994                             | 1305  | No | NA | 0 | 0 | Not-determined | Genome-fragment | NA | 0     |
| S11_k141_171119                             | 1642  | No | NA | 0 | 1 | Not-determined | Genome-fragment | NA | 0     |
| S11_k141_171121                             | 2648  | No | NA | 0 | 1 | Not-determined | Genome-fragment | NA | 0     |
| S11_k141_308958                             | 2355  | No | NA | 0 | 2 | Not-determined | Genome-fragment | NA | 0     |
| S11_k141_294719                             | 1092  | No | NA | 0 | 0 | Not-determined | Genome-fragment | NA | 0     |
| S1-final-viral-combined_k141_149079  full   | 1226  | No | NA | 2 | 0 | Low-quality    | Genome-fragment | NA | 2.75  |
| S11_k141_157024                             | 1568  | No | NA | 0 | 1 | Not-determined | Genome-fragment | NA | 0     |
| S11_k141_309009                             | 1066  | No | NA | 0 | 1 | Not-determined | Genome-fragment | NA | 0     |
| S1-final-viral-combined_k141_142473  full   | 1226  | No | NA | 0 | 0 | Low-quality    | Genome-fragment | NA | 1.69  |
| S11_k141_129476                             | 2116  | No | NA | 0 | 0 | Not-determined | Genome-fragment | NA | 0     |
| S5-final-viral-combined_k141_213093  full   | 1226  | No | NA | 0 | 0 | Low-quality    | Genome-fragment | NA | 2.54  |
| S11_k141_157076                             | 5853  | No | NA | 0 | 1 | Not-determined | Genome-fragment | NA | 0     |
| S5_k141_65740                               | 1226  | No | NA | 0 | 0 | Low-quality    | Genome-fragment | NA | 19.96 |
| S7-final-viral-combined_k141_244769  H2gene | 1226  | No | NA | 0 | 0 | Low-quality    | Genome-fragment | NA | 1.79  |
| S11_k141_226153                             | 1271  | No | NA | 1 | 1 | Not-determined | Genome-fragment | NA | 0     |
| S11_k141_143496                             | 4427  | No | NA | 0 | 3 | Not-determined | Genome-fragment | NA | 0     |
| S17-final-viral-combined_k141_13609  full   | 1226  | No | NA | 1 | 0 | Low-quality    | Genome-fragment | NA | 0.74  |
| S17-final-viral-combined_k141_105096  full  | 1226  | No | NA | 0 | 1 | Low-quality    | Genome-fragment | NA | 2.15  |
| S11_k141_171300                             | 9777  | No | NA | 0 | 4 | Not-determined | Genome-fragment | NA | 0     |
| S11_k141_226170                             | 3873  | No | NA | 0 | 3 | Not-determined | Genome-fragment | NA | 0     |
| S11_k141_33141                              | 1292  | No | NA | 0 | 2 | Not-determined | Genome-fragment | NA | 0     |
| S11_k141_171317                             | 3793  | No | NA | 0 | 2 | Not-determined | Genome-fragment | NA | 0     |
| S11_k141_294800                             | 3329  | No | NA | 0 | 1 | Not-determined | Genome-fragment | NA | 0     |
| S11_k141_38493                              | 1353  | No | NA | 0 | 1 | Not-determined | Genome-fragment | NA | 0     |
| S17-final-viral-combined_k141_186042  full  | 1226  | No | NA | 1 | 0 | Low-quality    | Genome-fragment | NA | 2.51  |
| S17-final-viral-combined_k141_232422  full  | 1226  | No | NA | 1 | 0 | Low-quality    | Genome-fragment | NA | 3.35  |
| S11_k141_74031                              | 3426  | No | NA | 0 | 3 | Not-determined | Genome-fragment | NA | 0     |
| S11_k141_253793                             | 1077  | No | NA | 0 | 1 | Not-determined | Genome-fragment | NA | 0     |
| S11_k141_88512                              | 1633  | No | NA | 0 | 1 | Not-determined | Genome-fragment | NA | 0     |
| S11_k141_28193                              | 1815  | No | NA | 0 | 1 | Not-determined | Genome-fragment | NA | 0     |
| S11_k141_31254                              | 1392  | No | NA | 0 | 0 | Not-determined | Genome-fragment | NA | 0     |
| S12-final-viral-combined_k141_248892  full  | 1226  | No | NA | 0 | 0 | Low-quality    | Genome-fragment | NA | 2.39  |
| S11_k141_213055                             | 2472  | No | NA | 0 | 2 | Not-determined | Genome-fragment | NA | 0     |
| S6-final-viral-combined_k141_76992  full    | 1226  | No | NA | 0 | 1 | Low-quality    | Genome-fragment | NA | 2.09  |
| S11_k141_157290                             | 1284  | No | NA | 0 | 1 | Not-determined | Genome-fragment | NA | 0     |
| S11_k141_240687                             | 1091  | No | NA | 0 | 0 | Not-determined | Genome-fragment | NA | 0     |
| S11_k141_213082                             | 1201  | No | NA | 0 | 1 | Not-determined | Genome-fragment | NA | 0     |
| S11_k141_198458                             | 1077  | No | NA | 0 | 1 | Not-determined | Genome-fragment | NA | 0     |
| S11_k141_47298                              | 17525 | No | NA | 0 | 7 | Not-determined | Genome-fragment | NA | 0     |
| S11_k141_157328                             | 3563  | No | NA | 0 | 3 | Not-determined | Genome-fragment | NA | 0     |
| S11_k141_102849                             | 3427  | No | NA | 0 | 1 | Not-determined | Genome-fragment | NA | 0     |
| S11_k141_129680                             | 1620  | No | NA | 0 | 1 | Not-determined | Genome-fragment | NA | 0     |
| S11_k141_47307                              | 1283  | No | NA | 0 | 1 | Not-determined | Genome-fragment | NA | 0     |
| S5-final-viral-combined_k141_194785  H2gene | 1227  | No | NA | 1 | 0 | Low-quality    | Genome-fragment | NA | 0.94  |
| S7-final-viral-combined_k141_193534  full   | 1227  | No | NA | 0 | 1 | Low-quality    | Genome-fragment | NA | 1.63  |
| S11_k141_5726                               | 2291  | No | NA | 0 | 1 | Not-determined | Genome-fragment | NA | 0     |
| S11_k141_184834                             | 1088  | No | NA | 0 | 0 | Not-determined | Genome-fragment | NA | 0     |
| S17-k141_243019                             | 1227  | No | NA | 0 | 0 | Low-quality    | Genome-fragment | NA | 2.33  |
| S11_k141_171487                             | 6578  | No | NA | 0 | 5 | Not-determined | Genome-fragment | NA | 0     |
| S11_k141_129813                             | 1093  | No | NA | 0 | 0 | Not-determined | Genome-fragment | NA | 0     |
| S11_k141_119827                             | 1684  | No | NA | 0 | 0 | Not-determined | Genome-fragment | NA | 0     |
| S11_k141_171503                             | 2184  | No | NA | 0 | 0 | Not-determined | Genome-fragment | NA | 0     |
| S11_k141_33446                              | 1072  | No | NA | 0 | 1 | Not-determined | Genome-fragment | NA | 0     |
| S11_k141_47198                              | 3222  | No | NA | 0 | 2 | Not-determined | Genome-fragment | NA | 0     |
| S11_k141_254067                             | 1672  | No | NA | 0 | 1 | Not-determined | Genome-fragment | NA | 0     |
| S11_k141_184893                             | 1886  | No | NA | 0 | 1 | Not-determined | Genome-fragment | NA | 0     |
| S12-final-viral-combined_k141_126541  full  | 1227  | No | NA | 0 | 0 | Low-quality    | Genome-fragment | NA | 2.92  |
| S11_k141_184924                             | 2102  | No | NA | 0 | 0 | Not-determined | Genome-fragment | NA | 0     |
| S11_k141_74301                              | 3031  | No | NA | 0 | 1 | Not-determined | Genome-fragment | NA | 0     |
| S11_k141_115492                             | 2418  | No | NA | 0 | 2 | Not-determined | Genome-fragment | NA | 0     |
| S11_k141_254133                             | 3517  | No | NA | 0 | 2 | Not-determined | Genome-fragment | NA | 0     |
| S11_k141_5827                               | 1001  | No | NA | 0 | 1 | Not-determined | Genome-fragment | NA | 0     |
| S11_k141_322217                             | 2517  | No | NA | 0 | 2 | Not-determined | Genome-fragment | NA | 0     |
| S11_k141_322234                             | 1000  | No | NA | 0 | 0 | Not-determined | Genome-fragment | NA | 0     |
| S11_k141_142870                             | 1004  | No | NA | 0 | 1 | Not-determined | Genome-fragment | NA | 0     |
| S12-final-viral-combined_k141_250065  full  | 1227  | No | NA | 0 | 0 | Low-quality    | Genome-fragment | NA | 2.3   |
| S12-final-viral-combined_k141_73995  H2gene | 1227  | No | NA | 0 | 0 | Low-quality    | Genome-fragment | NA | 0.79  |
| S11_k141_226583                             | 1276  | No | NA | 0 | 1 | Not-determined | Genome-fragment | NA | 0     |
| S2-final-viral-combined_k141_107872  full   | 1227  | No | NA | 0 | 1 | Low-quality    | Genome-fragment | NA | 2.68  |
| S11_k141_267863                             | 1329  | No | NA | 0 | 1 | Not-determined | Genome-fragment | NA | 0     |
| S11_k141_309645                             | 3952  | No | NA | 0 | 2 | Not-determined | Genome-fragment | NA | 0     |
| S11_k141_47569                              | 5513  | No | NA | 0 | 4 | Not-determined | Genome-fragment | NA | 0     |
| S11_k141_198693                             | 1056  | No | NA | 0 | 0 | Not-determined | Genome-fragment | NA | 0     |
| S11_k141_5945                               | 1774  | No | NA | 0 | 1 | Not-determined | Genome-fragment | NA | 0     |
| S11_k141_171685                             | 3820  | No | NA | 0 | 3 | Not-determined | Genome-fragment | NA | 0     |
| S11_k141_185049                             | 3118  | No | NA | 0 | 3 | Not-determined | Genome-fragment | NA | 0     |
| S11_k141_295205                             | 2242  | No | NA | 0 | 7 | Not-determined | Genome-fragment | NA | 0     |
| S11_k141_33647                              | 1992  | No | NA | 0 | 2 | Not-determined | Genome-fragment | NA | 0     |
| S11_k141_88781                              | 3666  | No | NA | 0 | 2 | Not-determined | Genome-fragment | NA | 0     |
| S4_k141_16729                               | 1227  | No | NA | 0 | 0 | Low-quality    | Genome-fragment | NA | 2.15  |
| S8-final-viral-combined_k141_135273  full   | 1227  | No | NA | 0 | 0 | Low-quality    | Genome-fragment | NA | 2.28  |
| S11_k141_226672                             | 2197  | No | NA | 0 | 2 | Not-determined | Genome-fragment | NA | 0     |
| S11_k141_6021                               | 1027  | No | NA | 0 | 1 | Not-determined | Genome-fragment | NA | 0     |
| S11_k141_33470                              | 1527  | No | NA | 0 | 2 | Not-determined | Genome-fragment | NA | 0     |
| S8-final-viral-combined_k141_148082  full   | 1227  | No | NA | 0 | 0 | Low-quality    | Genome-fragment | NA | 1.62  |
| S11_k141_19215                              | 8203  | No | NA | 0 | 3 | Not-determined | Genome-fragment | NA | 0     |
| S11_k141_267972                             | 3581  | No | NA | 0 | 3 | Not-determined | Genome-fragment | NA | 0     |
| S11_k141_309756                             | 1094  | No | NA | 0 | 0 | Not-determined | Genome-fragment | NA | 0     |
| S11_k141_267973                             | 1517  | No | NA | 0 | 1 | Not-determined | Genome-fragment | NA | 0     |
| S11_k141_115749                             | 1228  | No | NA | 0 | 1 | Not-determined | Genome-fragment | NA | 0     |
| S11_k141_31688                              | 6066  | No | NA | 0 | 2 | Not-determined | Genome-fragment | NA | 0     |
| S11_k141_267987                             | 2295  | No | NA | 0 | 0 | Not-determined | Genome-fragment | NA | 0     |
| S11_k141_295349                             | 6316  | No | NA | 0 | 2 | Not-determined | Genome-fragment | NA | 0     |
| S8-final-viral-combined_k141_183418  H2gene | 1227  | No | NA | 0 | 0 | Low-quality    | Genome-fragment | NA | 2.47  |
| S11_k141_115796                             | 1477  | No | NA | 0 | 1 | Not-determined | Genome-fragment | NA | 0     |
| S11_k141_144040                             | 1234  | No | NA | 0 | 1 | Not-determined | Genome-fragment | NA | 0     |
| S11_k141_144059                             | 1158  | No | NA | 0 | 2 | Not-determined | Genome-fragment | NA | 0     |
| S11_k141_198852                             | 5054  | No | NA | 0 | 2 | Not-determined | Genome-fragment | NA | 0     |
| S11_k141_115886                             | 9283  | No | NA | 0 | 4 | Not-determined | Genome-fragment | NA | 0     |
| S11_k141_225586                             | 1154  | No | NA | 0 | 1 | Not-determined | Genome-fragment | NA | 0     |
| S11_k141_171838                             | 1158  | No | NA | 0 | 0 | Not-determined | Genome-fragment | NA | 0     |
| S11_k141_241187                             | 1379  | No | NA | 0 | 1 | Not-determined | Genome-fragment | NA | 0     |
| S11_k141_144145                             | 1250  | No | NA | 0 | 1 | Not-determined | Genome-fragment | NA | 0     |
| S11_k141_144163                             | 1216  | No | NA | 0 | 0 | Not-determined | Genome-fragment | NA | 0     |
| S11_k141_61574                              | 1296  | No | NA | 0 | 1 | Not-determined | Genome-fragment | NA | 0     |
| S11_k141_6203                               | 45102 | No | NA | 1 | 9 | Medium-quality | Genome-fragment | NA | 50.63 |
| S11_k141_158032                             | 2810  | No | NA | 0 | 1 | Not-determined | Gen             |    |       |



|                                              |      |    |    |   |   |                |                 |    |       |   |
|----------------------------------------------|------|----|----|---|---|----------------|-----------------|----|-------|---|
| S11_k141_61811                               | 4298 | No | NA | 0 | 3 | Not-determined | Genome-fragment | NA |       | 0 |
| S1-final-viral-combined_k141_194928  Full    | 1228 | No | NA | 0 | 0 | Low-quality    | Genome-fragment | NA | 3.28  | 0 |
| S11_k141_295614                              | 4760 | No | NA | 0 | 0 | Not-determined | Genome-fragment | NA |       | 0 |
| S11_k141_295622                              | 1096 | No | NA | 0 | 1 | Not-determined | Genome-fragment | NA |       | 0 |
| S11_k141_227122                              | 1106 | No | NA | 0 | 1 | Not-determined | Genome-fragment | NA |       | 0 |
| S11_k141_74823                               | 1186 | No | NA | 0 | 3 | Not-determined | Genome-fragment | NA |       | 0 |
| S11_k141_213817                              | 1116 | No | NA | 0 | 0 | Not-determined | Genome-fragment | NA |       | 0 |
| S11_k141_295627                              | 3074 | No | NA | 0 | 2 | Not-determined | Genome-fragment | NA |       | 0 |
| S1_k141_246514                               | 1228 | No | NA | 0 | 0 | Low-quality    | Genome-fragment | NA | 22.21 | 0 |
| S11_k141_116154                              | 2118 | No | NA | 0 | 1 | Not-determined | Genome-fragment | NA |       | 0 |
| S11_k141_241558                              | 1612 | No | NA | 0 | 2 | Not-determined | Genome-fragment | NA |       | 0 |
| S7-final-viral-combined_k141_49830  Full     | 1228 | No | NA | 0 | 0 | Low-quality    | Genome-fragment | NA | 5.83  | 0 |
| S17-final-viral-combined_k141_8181  Full     | 1228 | No | NA | 0 | 0 | Low-quality    | Genome-fragment | NA | 2.76  | 0 |
| S11_k141_310268                              | 1331 | No | NA | 0 | 1 | Not-determined | Genome-fragment | NA |       | 0 |
| S11_k141_268382                              | 1524 | No | NA | 0 | 1 | Not-determined | Genome-fragment | NA |       | 0 |
| S11_k141_213877                              | 1050 | No | NA | 0 | 2 | Not-determined | Genome-fragment | NA |       | 0 |
| S11_k141_34127                               | 1028 | No | NA | 0 | 2 | Not-determined | Genome-fragment | NA |       | 0 |
| S11_k141_158427                              | 3104 | No | NA | 0 | 0 | Not-determined | Genome-fragment | NA |       | 0 |
| S2-final-viral-combined_k141_28342  Full     | 1228 | No | NA | 0 | 0 | Low-quality    | Genome-fragment | NA | 2.13  | 0 |
| S4-final-viral-combined_k141_40149  Full     | 1228 | No | NA | 0 | 1 | Low-quality    | Genome-fragment | NA | 0.71  | 0 |
| S4_k141_146941                               | 1228 | No | NA | 0 | 0 | Low-quality    | Genome-fragment | NA | 0.58  | 0 |
| S11_k141_171281                              | 1007 | No | NA | 0 | 1 | Not-determined | Genome-fragment | NA |       | 0 |
| S11_k141_89268                               | 1684 | No | NA | 0 | 0 | Not-determined | Genome-fragment | NA |       | 0 |
| S11_k141_268393                              | 1846 | No | NA | 0 | 0 | Not-determined | Genome-fragment | NA |       | 0 |
| S11_k141_74957                               | 1393 | No | NA | 0 | 0 | Not-determined | Genome-fragment | NA |       | 0 |
| S4_k141_18733                                | 1228 | No | NA | 0 | 1 | Low-quality    | Genome-fragment | NA | 0.86  | 0 |
| S11_k141_322932                              | 1304 | No | NA | 0 | 1 | Not-determined | Genome-fragment | NA |       | 0 |
| S11_k141_144480                              | 2122 | No | NA | 0 | 3 | Not-determined | Genome-fragment | NA |       | 0 |
| S11_k141_103668                              | 1533 | No | NA | 0 | 1 | Not-determined | Genome-fragment | NA |       | 0 |
| S6_k141_66074                                | 1228 | No | NA | 0 | 1 | Low-quality    | Genome-fragment | NA | 2.38  | 0 |
| S11_k141_213922                              | 1078 | No | NA | 0 | 1 | Not-determined | Genome-fragment | NA |       | 0 |
| S8-final-viral-combined_k141_31823  Full     | 1228 | No | NA | 0 | 0 | Low-quality    | Genome-fragment | NA | 1.86  | 0 |
| S11_k141_241744                              | 1013 | No | NA | 0 | 0 | Not-determined | Genome-fragment | NA |       | 0 |
| S9-final-viral-combined_k141_35731  Full     | 1229 | No | NA | 0 | 0 | Low-quality    | Genome-fragment | NA | 1.1   | 0 |
| S11_k141_75002                               | 2947 | No | NA | 0 | 1 | Not-determined | Genome-fragment | NA |       | 0 |
| S9-final-viral-combined_k141_97417  H2gene   | 1229 | No | NA | 1 | 0 | Low-quality    | Genome-fragment | NA | 1.61  | 0 |
| S11_k141_116361                              | 1005 | No | NA | 0 | 1 | Not-determined | Genome-fragment | NA |       | 0 |
| S11_k141_116381                              | 3407 | No | NA | 0 | 0 | Not-determined | Genome-fragment | NA |       | 0 |
| S11_k141_199373                              | 1006 | No | NA | 0 | 1 | Not-determined | Genome-fragment | NA |       | 0 |
| S11_k141_19801                               | 1479 | No | NA | 0 | 2 | Not-determined | Genome-fragment | NA |       | 0 |
| S11_k141_268564                              | 3320 | No | NA | 0 | 0 | Not-determined | Genome-fragment | NA |       | 0 |
| S11_k141_268578                              | 9152 | No | NA | 0 | 2 | Not-determined | Genome-fragment | NA |       | 0 |
| S11_k141_185659                              | 1157 | No | NA | 0 | 1 | Not-determined | Genome-fragment | NA |       | 0 |
| S11_k141_75075                               | 1615 | No | NA | 0 | 0 | Not-determined | Genome-fragment | NA |       | 0 |
| S1-final-viral-combined_k141_200958  Full    | 1229 | No | NA | 1 | 0 | Low-quality    | Genome-fragment | NA | 4.28  | 0 |
| S11_k141_227508                              | 3797 | No | NA | 0 | 1 | Not-determined | Genome-fragment | NA |       | 0 |
| S11_k141_214083                              | 6181 | No | NA | 0 | 4 | Not-determined | Genome-fragment | NA |       | 0 |
| S11_k141_344110                              | 1059 | No | NA | 0 | 0 | Not-determined | Genome-fragment | NA |       | 0 |
| S1-final-viral-combined_k141_270021  H2gene  | 1229 | No | NA | 1 | 0 | Low-quality    | Genome-fragment | NA | 3.52  | 0 |
| S11_k141_48130                               | 1605 | No | NA | 0 | 2 | Not-determined | Genome-fragment | NA |       | 0 |
| S5_k141_64176                                | 1229 | No | NA | 1 | 0 | Low-quality    | Genome-fragment | NA | 2.45  | 0 |
| S11_k141_19927                               | 1620 | No | NA | 0 | 1 | Not-determined | Genome-fragment | NA |       | 0 |
| S11_k141_116530                              | 1983 | No | NA | 0 | 1 | Not-determined | Genome-fragment | NA |       | 0 |
| S11_k141_130559                              | 1620 | No | NA | 0 | 2 | Not-determined | Genome-fragment | NA |       | 0 |
| S11_k141_172510                              | 1387 | No | NA | 0 | 1 | Not-determined | Genome-fragment | NA |       | 0 |
| S11_k141_310651                              | 2998 | No | NA | 0 | 1 | Not-determined | Genome-fragment | NA |       | 0 |
| S11_k141_214185                              | 2246 | No | NA | 0 | 0 | Not-determined | Genome-fragment | NA |       | 0 |
| S11_k141_259963                              | 1103 | No | NA | 0 | 0 | Not-determined | Genome-fragment | NA |       | 0 |
| S11_k141_144801                              | 1123 | No | NA | 0 | 0 | Not-determined | Genome-fragment | NA |       | 0 |
| S11_k141_62383                               | 1062 | No | NA | 0 | 1 | Not-determined | Genome-fragment | NA |       | 0 |
| S11_k141_323109                              | 1261 | No | NA | 0 | 1 | Not-determined | Genome-fragment | NA |       | 0 |
| S17-k141_106003                              | 1229 | No | NA | 0 | 1 | Low-quality    | Genome-fragment | NA | 0.33  | 0 |
| S4_k141_31795                                | 1229 | No | NA | 0 | 0 | Low-quality    | Genome-fragment | NA | 1.3   | 0 |
| S11_k141_283072                              | 1101 | No | NA | 0 | 1 | Not-determined | Genome-fragment | NA |       | 0 |
| S8-final-viral-combined_k141_268542  Full    | 1229 | No | NA | 0 | 1 | Low-quality    | Genome-fragment | NA | 0.86  | 0 |
| S11_k141_323163                              | 1514 | No | NA | 0 | 1 | Not-determined | Genome-fragment | NA |       | 0 |
| S8-final-viral-combined_k141_273811  Full    | 1229 | No | NA | 0 | 0 | Low-quality    | Genome-fragment | NA | 0.8   | 0 |
| S11_k141_283116                              | 1342 | No | NA | 0 | 0 | Not-determined | Genome-fragment | NA |       | 0 |
| S11_k141_89678                               | 1087 | No | NA | 0 | 0 | Not-determined | Genome-fragment | NA |       | 0 |
| S11_k141_34576                               | 1117 | No | NA | 0 | 0 | Not-determined | Genome-fragment | NA |       | 0 |
| S8-final-viral-combined_k141_265227  H2gene  | 1229 | No | NA | 1 | 0 | Low-quality    | Genome-fragment | NA | 0.69  | 0 |
| S9-final-viral-combined_k141_40092  Full     | 1230 | No | NA | 0 | 1 | Low-quality    | Genome-fragment | NA | 1.52  | 0 |
| S11_k141_20129                               | 3620 | No | NA | 0 | 3 | Not-determined | Genome-fragment | NA |       | 0 |
| S11_k141_62504                               | 1660 | No | NA | 0 | 0 | Not-determined | Genome-fragment | NA |       | 0 |
| S11-final-viral-combined_k141_983  Full      | 1230 | No | NA | 0 | 0 | Low-quality    | Genome-fragment | NA | 2.42  | 0 |
| S11_k141_255327                              | 1003 | No | NA | 1 | 0 | Not-determined | Genome-fragment | NA |       | 0 |
| S11_k141_214335                              | 4386 | No | NA | 0 | 4 | Not-determined | Genome-fragment | NA |       | 0 |
| S11_k141_227747                              | 3210 | No | NA | 0 | 1 | Not-determined | Genome-fragment | NA |       | 0 |
| S11-final-viral-combined_k141_211973  H2gene | 1230 | No | NA | 0 | 0 | Low-quality    | Genome-fragment | NA | 0.48  | 0 |
| S11_k141_145003                              | 1991 | No | NA | 0 | 0 | Not-determined | Genome-fragment | NA |       | 0 |
| S11_k141_268890                              | 1413 | No | NA | 0 | 1 | Not-determined | Genome-fragment | NA |       | 0 |
| S11_k141_62176                               | 4067 | No | NA | 0 | 0 | Not-determined | Genome-fragment | NA |       | 0 |
| S11_k141_48366                               | 3355 | No | NA | 0 | 2 | Not-determined | Genome-fragment | NA |       | 0 |
| S11_k141_20234                               | 2744 | No | NA | 0 | 2 | Not-determined | Genome-fragment | NA |       | 0 |
| S11_k141_242148                              | 3701 | No | NA | 0 | 1 | Not-determined | Genome-fragment | NA |       | 0 |
| S11_k141_62593                               | 1264 | No | NA | 0 | 3 | Not-determined | Genome-fragment | NA |       | 0 |
| S11_k141_80131                               | 1230 | No | NA | 1 | 0 | Low-quality    | Genome-fragment | NA | 2.66  | 0 |
| S5-final-viral-combined_k141_37717  Full     | 1230 | No | NA | 1 | 0 | Low-quality    | Genome-fragment | NA | 2.76  | 0 |
| S11_k141_20253                               | 247  | No | NA | 0 | 1 | Not-determined | Genome-fragment | NA |       | 0 |
| S11_k141_268920                              | 1702 | No | NA | 0 | 1 | Not-determined | Genome-fragment | NA |       | 0 |
| S11_k141_75440                               | 3710 | No | NA | 0 | 3 | Not-determined | Genome-fragment | NA |       | 0 |
| S11_k141_130764                              | 1683 | No | NA | 0 | 2 | Not-determined | Genome-fragment | NA |       | 0 |
| S11_k141_75470                               | 1179 | No | NA | 0 | 1 | Not-determined | Genome-fragment | NA |       | 0 |
| S5-final-viral-combined_k141_22282  Full     | 1230 | No | NA | 0 | 0 | Low-quality    | Genome-fragment | NA | 1.67  | 0 |
| S11_k141_323330                              | 3156 | No | NA | 0 | 2 | Not-determined | Genome-fragment | NA |       | 0 |
| S11_k141_130808                              | 1808 | No | NA | 0 | 0 | Not-determined | Genome-fragment | NA |       | 0 |
| S11_k141_323355                              | 1833 | No | NA | 0 | 2 | Not-determined | Genome-fragment | NA |       | 0 |
| S11_k141_255519                              | 1452 | No | NA | 0 | 1 | Not-determined | Genome-fragment | NA |       | 0 |
| S11_k141_242359                              | 1192 | No | NA | 0 | 1 | Not-determined | Genome-fragment | NA |       | 0 |
| S11_k141_172904                              | 1178 | No | NA | 0 | 0 | Not-determined | Genome-fragment | NA |       | 0 |
| S5_k141_17740                                | 1230 | No | NA | 1 | 0 | Low-quality    | Genome-fragment | NA | 3.6   | 0 |
| S11_k141_130846                              | 3405 | No | NA | 0 | 0 | Not-determined | Genome-fragment | NA |       | 0 |
| S7-final-viral-combined_k141_127117  Full    | 1230 | No | NA | 0 | 0 | Low-quality    | Genome-fragment | NA | 20.86 | 0 |
| S11_k141_89875                               | 6523 | No | NA | 0 | 2 | Not-determined | Genome-fragment | NA |       | 0 |
| S11_k141_104253                              | 1145 | No | NA | 0 | 0 | Not-determined | Genome-fragment | NA |       | 0 |
| S12_k141_318936                              | 1230 | No | NA | 0 | 1 | Low-quality    | Genome-fragment | NA | 0.8   | 0 |
| S11_k141_34921                               | 3306 | No | NA | 0 | 1 | Not-determined | Genome-fragment | NA |       | 0 |
| S11_k141_62773                               | 1091 | No | NA | 0 | 0 | Not-determined | Genome-fragment | NA |       | 0 |
| S11_k141_228018                              | 1115 | No | NA | 0 | 0 | Not-determined | Genome-fragment | NA |       | 0 |
| S11_k141_228021                              | 1191 | No | NA | 0 | 0 | Not-determined | Genome-fragment | NA |       | 0 |
| S11_k141_62802                               | 1105 | No | NA | 0 | 1 | Not-determined | Genome-fragment | NA |       | 0 |
| S8_k141_218140                               | 1210 | No | NA | 0 | 0 | Low-quality    | Genome-fragment | NA | 0.75  | 0 |
| S11_k141_116893                              | 1458 | No | NA | 0 | 0 | Not-determined | Genome-fragment | NA |       | 0 |
| S11_k141_228072                              | 1606 | No | NA | 0 | 1 | Not-determined | Genome-fragment | NA |       | 0 |
| S9-final-viral-combined_k141_86625  Full     | 1231 | No | NA | 0 | 0 | Low-quality    | Genome-fragment | NA | 3.15  | 0 |
| S11_k141_130959                              | 4611 | No | NA | 0 | 2 | Not-determined | Genome-fragment | NA |       | 0 |
| S11_k141_323507                              | 3255 | No | NA | 0 | 1 | Not-determined | Genome-fragment | NA |       | 0 |
| S11_k141_255720                              | 4258 | No | NA | 0 | 3 | Not-determined | Genome-fragment | NA |       | 0 |
| S11_k141_311103                              | 1207 | No | NA | 0 | 1 | Not-determined | Genome-fragment | NA |       | 0 |
| S11_k141_323522                              | 1631 | No | NA | 0 | 1 | Not-determined | Genome-fragment | NA |       | 0 |
| S11-final-viral-combined_k141_208251  Full   | 1231 | No | NA | 0 | 1 | Low-quality    | Genome-fragment | NA | 2.19  | 0 |
| S11-final-viral-combined_k141_226464  H2gene | 1231 | No | NA | 0 | 0 | Low-quality    | Genome-fragment | NA | 0.77  | 0 |
| S11_k141_48693                               | 1304 | No | NA | 0 | 1 | Not-determined | Genome-fragment | NA |       | 0 |
| S3-final-viral-combined_k141_61607  Full     | 1231 | No | NA | 0 | 0 | Low-quality    | Genome-fragment | NA | 1.28  | 0 |
| S11_k141_90106                               | 1449 | No | NA | 0 | 1 | Not-determined | Genome-fragment | NA |       | 0 |
| S11_k141_104393                              | 2290 | No | NA | 0 | 1 | Not-determined | Genome-fragment | NA |       | 0 |
| S5-final-viral-combined_k141_90994  Full     | 1231 | No | NA | 1 | 0 | Low-quality    | Genome-fragment | NA | 2.94  | 0 |
| S11_k141_48732                               | 1525 | No | NA | 0 | 2 | Not-determined | Genome-fragment | NA |       | 0 |
| S5-final-viral-combined_k141_42096  Full     | 1231 | No | NA | 0 | 0 | Low-quality    | Genome-fragment | NA | 1.19  | 0 |
| S11_k141_62950                               | 3859 | No | NA | 0 | 2 | Not-determined | Genome-fragment | NA |       | 0 |
| S5-final-viral-combined_k141_87428  Full     | 1231 | No | NA | 0 | 0 | Low-quality    | Genome-fragment | NA | 2.68  | 0 |
| S11_k141_242547                              | 1964 | No | NA | 0 | 1 | Not-determined | Genome-fragment | NA |       | 0 |
| S11_k141_35219                               | 1206 | No | NA | 0 | 0 | Not-determined | Genome-fragment | NA |       | 0 |
| S11_k141_186225                              | 3100 | No | NA | 0 | 2 | Not-determined | Genome-fragment | NA |       | 0 |
| S7-final-viral-combined_k141_227967  Full    | 1231 | No | NA | 0 | 0 | Low-quality    | Genome-fragment | NA | 2.33  | 0 |
| S11_k141_228205                              | 1058 | No | NA | 0 | 1 | Not-determined | Genome-fragment | NA |       | 0 |
| S11_k141_200073                              | 1173 | No | NA | 0 | 1 | Not-determined | Genome-fragment | NA |       | 0 |
| S11_k141_                                    |      |    |    |   |   |                |                 |    |       |   |



|                                      |      |    |    |   |   |                |                 |    |      |
|--------------------------------------|------|----|----|---|---|----------------|-----------------|----|------|
| S11_k141_200413                      | 1606 | No | NA | 0 | 0 | Not-determined | Genome-fragment | NA | 0    |
| S11_k141_49125                       | 1210 | No | NA | 0 | 0 | Not-determined | Genome-fragment | NA | 0    |
| S11_k141_228642                      | 1021 | No | NA | 0 | 0 | Not-determined | Genome-fragment | NA | 0    |
| S11_k141_323959                      | 1157 | No | NA | 0 | 1 | Not-determined | Genome-fragment | NA | 0    |
| S7_k141_184430                       | 1232 | No | NA | 0 | 0 | Low-quality    | Genome-fragment | NA | 0    |
| S11_k141_49202                       | 1449 | No | NA | 0 | 0 | Not-determined | Genome-fragment | NA | 0    |
| S17-final-viral-combined_k141_109987 | 1232 | No | NA | 0 | 1 | Low-quality    | Genome-fragment | NA | 1.2  |
| S12-final-viral-combined_k141_305606 | 1232 | No | NA | 0 | 0 | Low-quality    | Genome-fragment | NA | 1.97 |
| S11_k141_117607                      | 1261 | No | NA | 0 | 0 | Not-determined | Genome-fragment | NA | 0    |
| S11_k141_63390                       | 2892 | No | NA | 0 | 0 | Not-determined | Genome-fragment | NA | 0    |
| S12_k141_101223                      | 1232 | No | NA | 2 | 0 | Low-quality    | Genome-fragment | NA | 2.93 |
| S11_k141_209752                      | 1811 | No | NA | 0 | 0 | Not-determined | Genome-fragment | NA | 0    |
| S4-final-viral-combined_k141_166272  | 1232 | No | NA | 0 | 0 | Low-quality    | Genome-fragment | NA | 3.31 |
| S11_k141_131501                      | 1074 | No | NA | 0 | 0 | Not-determined | Genome-fragment | NA | 0    |
| S11_k141_131662                      | 2152 | No | NA | 0 | 2 | Not-determined | Genome-fragment | NA | 0    |
| S4-final-viral-combined_k141_12297   | 1232 | No | NA | 0 | 0 | Low-quality    | Genome-fragment | NA | 1.62 |
| S11_k141_104981                      | 2075 | No | NA | 1 | 0 | Not-determined | Genome-fragment | NA | 0    |
| S4_k141_158992                       | 1232 | No | NA | 1 | 0 | Low-quality    | Genome-fragment | NA | 0.71 |
| S4_k141_27610                        | 1232 | No | NA | 1 | 0 | Low-quality    | Genome-fragment | NA | 0.4  |
| S11_k141_173730                      | 1104 | No | NA | 0 | 1 | Not-determined | Genome-fragment | NA | 0    |
| S11_k141_311717                      | 5215 | No | NA | 0 | 1 | Not-determined | Genome-fragment | NA | 0    |
| S11_k141_311737                      | 3553 | No | NA | 0 | 2 | Not-determined | Genome-fragment | NA | 0    |
| S11-final-viral-combined_k141_279270 | 1233 | No | NA | 0 | 0 | Low-quality    | Genome-fragment | NA | 3.85 |
| S11_k141_131558                      | 1191 | No | NA | 0 | 1 | Not-determined | Genome-fragment | NA | 0    |
| S11_k141_269860                      | 1127 | No | NA | 0 | 0 | Not-determined | Genome-fragment | NA | 0    |
| S11_k141_8187                        | 1026 | No | NA | 0 | 0 | Not-determined | Genome-fragment | NA | 0    |
| S11_k141_49279                       | 3264 | No | NA | 0 | 1 | Not-determined | Genome-fragment | NA | 0    |
| S11_k141_311789                      | 1247 | No | NA | 0 | 1 | Not-determined | Genome-fragment | NA | 0    |
| S11_k141_269885                      | 1289 | No | NA | 0 | 0 | Not-determined | Genome-fragment | NA | 0    |
| S11_k141_49322                       | 4555 | No | NA | 0 | 1 | Not-determined | Genome-fragment | NA | 0    |
| S11_k141_311801                      | 1723 | No | NA | 0 | 2 | Not-determined | Genome-fragment | NA | 0    |
| S11-final-viral-combined_k141_197395 | 1233 | No | NA | 0 | 0 | Low-quality    | Genome-fragment | NA | 1.13 |
| S11_k141_284004                      | 1349 | No | NA | 0 | 1 | Not-determined | Genome-fragment | NA | 0    |
| S11_k141_76406                       | 1123 | No | NA | 0 | 1 | Not-determined | Genome-fragment | NA | 0    |
| S4-final-viral-combined_k141_192956  | 1233 | No | NA | 0 | 0 | Low-quality    | Genome-fragment | NA | 0.76 |
| S11_k141_269922                      | 1066 | No | NA | 0 | 0 | Not-determined | Genome-fragment | NA | 0    |
| S11_k141_215201                      | 2009 | No | NA | 0 | 2 | Not-determined | Genome-fragment | NA | 0    |
| S11_k141_105099                      | 5115 | No | NA | 0 | 2 | Not-determined | Genome-fragment | NA | 0    |
| S11_k141_243219                      | 4802 | No | NA | 0 | 2 | Not-determined | Genome-fragment | NA | 0    |
| S5-final-viral-combined_k141_198660  | 1233 | No | NA | 1 | 0 | Low-quality    | Genome-fragment | NA | 0.76 |
| S11_k141_173885                      | 4421 | No | NA | 0 | 3 | Not-determined | Genome-fragment | NA | 0    |
| S11_k141_204126                      | 1600 | No | NA | 0 | 0 | Not-determined | Genome-fragment | NA | 0    |
| S7-final-viral-combined_k141_11020   | 1233 | No | NA | 0 | 2 | Low-quality    | Genome-fragment | NA | 2.72 |
| S11_k141_243270                      | 2788 | No | NA | 0 | 0 | Not-determined | Genome-fragment | NA | 0    |
| S11_k141_30940                       | 4050 | No | NA | 0 | 2 | Not-determined | Genome-fragment | NA | 0    |
| S11_k141_49483                       | 2669 | No | NA | 0 | 4 | Not-determined | Genome-fragment | NA | 0    |
| S11_k141_187007                      | 1190 | No | NA | 0 | 0 | Not-determined | Genome-fragment | NA | 0    |
| S11_k141_105237                      | 3589 | No | NA | 0 | 1 | Not-determined | Genome-fragment | NA | 0    |
| S17-final-viral-combined_k141_167710 | 1233 | No | NA | 0 | 0 | Low-quality    | Genome-fragment | NA | 1.93 |
| S17-final-viral-combined_k141_177361 | 1233 | No | NA | 0 | 0 | Low-quality    | Genome-fragment | NA | 3.08 |
| S11_k141_215367                      | 4872 | No | NA | 0 | 3 | Not-determined | Genome-fragment | NA | 0    |
| S11_k141_187075                      | 1151 | No | NA | 0 | 0 | Not-determined | Genome-fragment | NA | 0    |
| S11_k141_297373                      | 1431 | No | NA | 0 | 0 | Not-determined | Genome-fragment | NA | 0    |
| S11_k141_36067                       | 5147 | No | NA | 0 | 4 | Not-determined | Genome-fragment | NA | 0    |
| S17-final-viral-combined_k141_182284 | 1233 | No | NA | 1 | 0 | Low-quality    | Genome-fragment | NA | 3.08 |
| S11_k141_117946                      | 1182 | No | NA | 0 | 1 | Not-determined | Genome-fragment | NA | 0    |
| S11_k141_284305                      | 4821 | No | NA | 0 | 3 | Not-determined | Genome-fragment | NA | 0    |
| S11_k141_228983                      | 1778 | No | NA | 0 | 1 | Not-determined | Genome-fragment | NA | 0    |
| S17-k141_152454                      | 1233 | No | NA | 0 | 0 | Low-quality    | Genome-fragment | NA | 2.06 |
| S11_k141_63750                       | 1094 | No | NA | 0 | 1 | Not-determined | Genome-fragment | NA | 0    |
| S11_k141_131817                      | 2154 | No | NA | 0 | 0 | Not-determined | Genome-fragment | NA | 0    |
| S11_k141_187160                      | 1357 | No | NA | 0 | 1 | Not-determined | Genome-fragment | NA | 0    |
| S11_k141_297407                      | 8265 | No | NA | 0 | 4 | Not-determined | Genome-fragment | NA | 0    |
| S11_k141_256724                      | 1692 | No | NA | 0 | 1 | Not-determined | Genome-fragment | NA | 0    |
| S11_k141_131829                      | 2112 | No | NA | 0 | 2 | Not-determined | Genome-fragment | NA | 0    |
| S11_k141_284360                      | 1068 | No | NA | 0 | 0 | Not-determined | Genome-fragment | NA | 0    |
| S11_k141_146200                      | 1380 | No | NA | 0 | 1 | Not-determined | Genome-fragment | NA | 0    |
| S12-final-viral-combined_k141_218539 | 1233 | No | NA | 0 | 0 | Low-quality    | Genome-fragment | NA | 1.7  |
| S11_k141_311999                      | 1237 | No | NA | 0 | 0 | Not-determined | Genome-fragment | NA | 0    |
| S11_k141_297437                      | 1958 | No | NA | 0 | 1 | Not-determined | Genome-fragment | NA | 0    |
| S11_k141_200935                      | 6390 | No | NA | 0 | 2 | Not-determined | Genome-fragment | NA | 0    |
| S11_k141_314354                      | 1024 | No | NA | 0 | 4 | Not-determined | Genome-fragment | NA | 0    |
| S11_k141_63767                       | 4145 | No | NA | 0 | 2 | Not-determined | Genome-fragment | NA | 0    |
| S11_k141_118037                      | 1133 | No | NA | 0 | 2 | Not-determined | Genome-fragment | NA | 0    |
| S11_k141_200951                      | 1149 | No | NA | 0 | 1 | Not-determined | Genome-fragment | NA | 0    |
| S11_k141_200999                      | 4704 | No | NA | 0 | 2 | Not-determined | Genome-fragment | NA | 0    |
| S11_k141_201004                      | 1767 | No | NA | 0 | 2 | Not-determined | Genome-fragment | NA | 0    |
| S11_k141_76788                       | 1046 | No | NA | 0 | 1 | Not-determined | Genome-fragment | NA | 0    |
| S11_k141_229105                      | 1193 | No | NA | 0 | 0 | Not-determined | Genome-fragment | NA | 0    |
| S11_k141_256886                      | 1529 | No | NA | 0 | 1 | Not-determined | Genome-fragment | NA | 0    |
| S11_k141_229129                      | 1190 | No | NA | 0 | 1 | Not-determined | Genome-fragment | NA | 0    |
| S12-final-viral-combined_k141_231558 | 1233 | No | NA | 0 | 0 | Low-quality    | Genome-fragment | NA | 1.02 |
| S11_k141_324401                      | 4511 | No | NA | 0 | 1 | Not-determined | Genome-fragment | NA | 0    |
| S11_k141_76846                       | 1173 | No | NA | 0 | 0 | Not-determined | Genome-fragment | NA | 0    |
| S11_k141_21408                       | 1377 | No | NA | 0 | 1 | Not-determined | Genome-fragment | NA | 0    |
| S11_k141_146378                      | 1090 | No | NA | 0 | 0 | Not-determined | Genome-fragment | NA | 0    |
| S11_k141_91215                       | 1489 | No | NA | 0 | 1 | Not-determined | Genome-fragment | NA | 0    |
| S12-final-viral-combined_k141_231530 | 1233 | No | NA | 1 | 0 | Low-quality    | Genome-fragment | NA | 0.47 |
| S4-final-viral-combined_k141_148690  | 1233 | No | NA | 0 | 0 | Low-quality    | Genome-fragment | NA | 2.13 |
| S4_k141_117760                       | 1233 | No | NA | 0 | 0 | Low-quality    | Genome-fragment | NA | 0.53 |
| S11_k141_324474                      | 3179 | No | NA | 0 | 4 | Not-determined | Genome-fragment | NA | 0    |
| S11_k141_49875                       | 1025 | No | NA | 0 | 0 | Not-determined | Genome-fragment | NA | 0    |
| S11_k141_8849                        | 3857 | No | NA | 0 | 1 | Not-determined | Genome-fragment | NA | 0    |
| S8-final-viral-combined_k141_271227  | 1233 | No | NA | 0 | 0 | Low-quality    | Genome-fragment | NA | 1.79 |
| S9-final-viral-combined_k141_82223   | 1234 | No | NA | 0 | 0 | Low-quality    | Genome-fragment | NA | 1.91 |
| S17-final-viral-combined_k141_116998 | 1234 | No | NA | 1 | 0 | Low-quality    | Genome-fragment | NA | 2    |
| S4-final-viral-combined_k141_160636  | 1234 | No | NA | 0 | 2 | Low-quality    | Genome-fragment | NA | 0.87 |
| S11_k141_83849                       | 1999 | No | NA | 0 | 1 | Not-determined | Genome-fragment | NA | 0    |
| S11_k141_8895                        | 3614 | No | NA | 0 | 1 | Not-determined | Genome-fragment | NA | 0    |
| S11_k141_118189                      | 1502 | No | NA | 0 | 4 | Not-determined | Genome-fragment | NA | 0    |
| S11_k141_160324                      | 1117 | No | NA | 0 | 1 | Not-determined | Genome-fragment | NA | 0    |
| S11_k141_91268                       | 7536 | No | NA | 0 | 2 | Not-determined | Genome-fragment | NA | 0    |
| S8-final-viral-combined_k141_172064  | 1234 | No | NA | 0 | 1 | Low-quality    | Genome-fragment | NA | 2.32 |
| S11_k141_243628                      | 1214 | No | NA | 0 | 2 | Not-determined | Genome-fragment | NA | 0    |
| S11_k141_243649                      | 2218 | No | NA | 0 | 1 | Not-determined | Genome-fragment | NA | 0    |
| S11_k141_105653                      | 1479 | No | NA | 0 | 1 | Not-determined | Genome-fragment | NA | 0    |
| S9-final-viral-combined_k141_79303   | 1235 | No | NA | 0 | 0 | Low-quality    | Genome-fragment | NA | 2.79 |
| S11_k141_257056                      | 1053 | No | NA | 0 | 1 | Not-determined | Genome-fragment | NA | 0    |
| S11-final-viral-combined_k141_399    | 1235 | No | NA | 0 | 0 | Low-quality    | Genome-fragment | NA | 3.39 |
| S11_k141_284533                      | 1000 | No | NA | 0 | 0 | Not-determined | Genome-fragment | NA | 0    |
| S11_k141_270247                      | 1198 | No | NA | 0 | 1 | Not-determined | Genome-fragment | NA | 0    |
| S11_k141_49094                       | 3046 | No | NA | 0 | 1 | Not-determined | Genome-fragment | NA | 0    |
| S11_k141_312264                      | 1312 | No | NA | 0 | 0 | Not-determined | Genome-fragment | NA | 0    |
| S11_k141_324527                      | 1002 | No | NA | 0 | 1 | Not-determined | Genome-fragment | NA | 0    |
| S11_k141_201265                      | 1619 | No | NA | 0 | 0 | Not-determined | Genome-fragment | NA | 0    |
| S1-final-viral-combined_k141_54451   | 1235 | No | NA | 0 | 2 | Low-quality    | Genome-fragment | NA | 0.39 |
| S11_k141_187442                      | 1720 | No | NA | 0 | 2 | Not-determined | Genome-fragment | NA | 0    |
| S1-final-viral-combined_k141_386392  | 1235 | No | NA | 1 | 0 | Low-quality    | Genome-fragment | NA | 1.86 |
| S11_k141_312204                      | 1047 | No | NA | 0 | 0 | Not-determined | Genome-fragment | NA | 0    |
| S11_k141_105758                      | 4371 | No | NA | 0 | 0 | Not-determined | Genome-fragment | NA | 0    |
| S11_k141_105766                      | 1141 | No | NA | 0 | 1 | Not-determined | Genome-fragment | NA | 0    |
| S11_k141_211535                      | 1015 | No | NA | 0 | 0 | Not-determined | Genome-fragment | NA | 0    |
| S1_k141_177159                       | 1235 | No | NA | 2 | 0 | Low-quality    | Genome-fragment | NA | 1.99 |
| S11_k141_201344                      | 6828 | No | NA | 0 | 3 | Not-determined | Genome-fragment | NA | 0    |
| S11_k141_211572                      | 2392 | No | NA | 0 | 4 | Not-determined | Genome-fragment | NA | 0    |
| S5-final-viral-combined_k141_22059   | 1235 | No | NA | 1 | 0 | Low-quality    | Genome-fragment | NA | 3.52 |
| S11_k141_21622                       | 5846 | No | NA | 0 | 1 | Not-determined | Genome-fragment | NA | 0    |
| S11_k141_50129                       | 1176 | No | NA | 0 | 0 | Not-determined | Genome-fragment | NA | 0    |
| S11_k141_297793                      | 1658 | No | NA | 0 | 0 | Not-determined | Genome-fragment | NA | 0    |
| S11_k141_201429                      | 1129 | No | NA | 0 | 1 | Not-determined | Genome-fragment | NA | 0    |
| S4-final-viral-combined_k141_131787  | 1235 | No | NA | 3 | 0 | Low-quality    | Genome-fragment | NA | 2.89 |
| S11_k141_297809                      | 3713 | No | NA | 0 | 1 | Not-determined | Genome-fragment | NA | 0    |
| S11_k141_270427                      | 1605 | No | NA | 0 | 0 | Not-determined | Genome-fragment | NA | 0    |
| S11_k141_297837                      | 2502 | No | NA | 0 | 1 | Not-determined | Genome-fragment | NA | 0    |
| S11_k141_36536                       | 1022 | No | NA | 0 | 1 | Not-determined | Genome-fragment | NA | 0    |
| S11_k141_284762                      | 2754 | No | NA | 0 | 0 | Not-determined | Genome-fragment | NA | 0    |
| S11_k141_270475                      | 1157 | No | NA | 0 | 0 | Not-determined | Genome-fragment | NA | 0    |
| S17-final-viral-combined_k141_112910 | 1235 | No | NA | 0 | 0 | Low-quality    | Genome-fragment | NA | 2.22 |
| S11_k141_229574                      | 1466 | No | NA | 0 | 1 | Not-determined | Genome-fragment | NA | 0    |
| S11_k141_91546                       | 1237 | No | NA | 0 | 1 | Not-determined | Genome-fragment | NA | 0    |
| S17-final-viral-combined_k141_195822 | 1235 | No | NA | 0 | 0 | Low-quality    | Genome-fragment | NA | 3.16 |
| S11_k141_324811                      | 1613 | No | NA | 0 | 1 | Not-determined | Genome-fragment | NA | 0    |
| S2-final-viral-combined_k141_101394  | 1235 | No | NA | 0 | 0 | Low-quality    | Genome-fragment | NA | 2.29 |
| S11_k141_284840                      | 1018 | No | NA | 0 | 0 | Not-determined | Genome-fragment | NA | 0    |
| S11_k141_229649                      | 1359 | No | NA | 0 | 1 | Not-determined | Genome-fragment | NA |      |



|                                              |       |    |    |   |   |   |                |                 |    |      |
|----------------------------------------------|-------|----|----|---|---|---|----------------|-----------------|----|------|
| S11_k141_270774                              | 3079  | No | NA | 0 | 0 | 0 | Not-determined | Genome-fragment | NA | 0    |
| S11_k141_36840                               | 1042  | No | NA | 0 | 0 | 0 | Not-determined | Genome-fragment | NA | 0    |
| S11_k141_118792                              | 6573  | No | NA | 0 | 0 | 0 | Not-determined | Genome-fragment | NA | 0    |
| S8_k141_27172                                | 1236  | No | NA | 0 | 0 | 0 | Low-quality    | Genome-fragment | NA | 2    |
| S11_k141_147008                              | 1005  | No | NA | 0 | 0 | 1 | Not-determined | Genome-fragment | NA | 0    |
| S11-final-viral-combined_k141_231733  full   | 1217  | No | NA | 1 | 0 | 0 | Low-quality    | Genome-fragment | NA | 0.75 |
| S11_k141_312781                              | 1087  | No | NA | 0 | 0 | 1 | Not-determined | Genome-fragment | NA | 0    |
| S1-final-viral-combined_k141_29523  full     | 1237  | No | NA | 0 | 0 | 0 | Low-quality    | Genome-fragment | NA | 2.49 |
| S11_k141_201880                              | 13760 | No | NA | 0 | 0 | 0 | Not-determined | Genome-fragment | NA | 0    |
| S11_k141_201884                              | 1002  | No | NA | 0 | 0 | 1 | Not-determined | Genome-fragment | NA | 0    |
| S5-final-viral-combined_k141_121263  full    | 1237  | No | NA | 1 | 0 | 0 | Low-quality    | Genome-fragment | NA | 2.24 |
| S11_k141_64400                               | 1114  | No | NA | 0 | 0 | 0 | Not-determined | Genome-fragment | NA | 0    |
| S11_k141_64410                               | 1660  | No | NA | 0 | 0 | 1 | Not-determined | Genome-fragment | NA | 0    |
| S11_k141_161025                              | 1355  | No | NA | 0 | 0 | 1 | Not-determined | Genome-fragment | NA | 0    |
| S11_k141_312812                              | 3782  | No | NA | 0 | 0 | 0 | Not-determined | Genome-fragment | NA | 0    |
| S11_k141_201384                              | 3869  | No | NA | 0 | 0 | 2 | Not-determined | Genome-fragment | NA | 0    |
| S11_k141_106378                              | 1378  | No | NA | 0 | 0 | 1 | Not-determined | Genome-fragment | NA | 0    |
| S11_k141_201993                              | 1111  | No | NA | 0 | 0 | 1 | Not-determined | Genome-fragment | NA | 0    |
| S11_k141_121232                              | 1219  | No | NA | 0 | 0 | 0 | Not-determined | Genome-fragment | NA | 0    |
| S11_k141_325187                              | 6715  | No | NA | 0 | 0 | 3 | Not-determined | Genome-fragment | NA | 0    |
| S5-final-viral-combined_k141_68743  H2gene   | 1237  | No | NA | 1 | 0 | 0 | Low-quality    | Genome-fragment | NA | 2.15 |
| S11_k141_270881                              | 1093  | No | NA | 0 | 0 | 1 | Not-determined | Genome-fragment | NA | 0    |
| S11_k141_312906                              | 1055  | No | NA | 0 | 0 | 1 | Not-determined | Genome-fragment | NA | 0    |
| S11_k141_64506                               | 1322  | No | NA | 0 | 0 | 0 | Not-determined | Genome-fragment | NA | 0    |
| S5_k141_59771                                | 1237  | No | NA | 0 | 0 | 0 | Low-quality    | Genome-fragment | NA | 2.53 |
| S11_k141_188172                              | 1017  | No | NA | 0 | 0 | 2 | Not-determined | Genome-fragment | NA | 0    |
| S11_k141_230016                              | 4361  | No | NA | 0 | 0 | 2 | Not-determined | Genome-fragment | NA | 0    |
| S11_k141_106474                              | 8121  | No | NA | 0 | 0 | 5 | Not-determined | Genome-fragment | NA | 0    |
| S11_k141_106491                              | 1286  | No | NA | 0 | 0 | 1 | Not-determined | Genome-fragment | NA | 0    |
| S11_k141_257827                              | 1074  | No | NA | 0 | 0 | 1 | Not-determined | Genome-fragment | NA | 0    |
| S2-final-viral-combined_k141_33422  full     | 1237  | No | NA | 0 | 0 | 1 | Low-quality    | Genome-fragment | NA | 1.69 |
| S11_k141_270907                              | 1173  | No | NA | 0 | 0 | 1 | Not-determined | Genome-fragment | NA | 0    |
| S11_k141_147244                              | 1608  | No | NA | 0 | 0 | 0 | Not-determined | Genome-fragment | NA | 0    |
| S11_k141_202183                              | 1826  | No | NA | 0 | 0 | 1 | Not-determined | Genome-fragment | NA | 0    |
| S11_k141_323517                              | 1668  | No | NA | 0 | 0 | 2 | Not-determined | Genome-fragment | NA | 0    |
| S9_k141_3484                                 | 1218  | No | NA | 0 | 0 | 0 | Low-quality    | Genome-fragment | NA | 3.78 |
| S11_k141_285473                              | 3504  | No | NA | 0 | 0 | 1 | Not-determined | Genome-fragment | NA | 0    |
| S11-final-viral-combined_k141_39438  full    | 1238  | No | NA | 0 | 0 | 2 | Low-quality    | Genome-fragment | NA | 1.95 |
| S11_k141_257935                              | 1556  | No | NA | 0 | 0 | 1 | Not-determined | Genome-fragment | NA | 0    |
| S11_k141_244498                              | 1498  | No | NA | 0 | 0 | 0 | Not-determined | Genome-fragment | NA | 0    |
| S11_k141_175166                              | 1098  | No | NA | 0 | 0 | 1 | Not-determined | Genome-fragment | NA | 0    |
| S11_k141_202054                              | 1218  | No | NA | 0 | 0 | 0 | Low-quality    | Genome-fragment | NA | 2.27 |
| S11_k141_161264                              | 1090  | No | NA | 0 | 0 | 1 | Not-determined | Genome-fragment | NA | 0    |
| S11_k141_325406                              | 1087  | No | NA | 0 | 0 | 1 | Not-determined | Genome-fragment | NA | 0    |
| S11_k141_92143                               | 1224  | No | NA | 0 | 0 | 0 | Not-determined | Genome-fragment | NA | 0    |
| S1-final-viral-combined_k141_329408  full    | 1218  | No | NA | 0 | 0 | 0 | Low-quality    | Genome-fragment | NA | 2.85 |
| S11_k141_132554                              | 3759  | No | NA | 0 | 0 | 3 | Not-determined | Genome-fragment | NA | 0    |
| S11_k141_77822                               | 1217  | No | NA | 0 | 0 | 1 | Not-determined | Genome-fragment | NA | 0    |
| S3_k141_23549                                | 1218  | No | NA | 0 | 0 | 1 | Low-quality    | Genome-fragment | NA | 0.35 |
| S5-final-viral-combined_k141_187618  full    | 1238  | No | NA | 1 | 0 | 0 | Low-quality    | Genome-fragment | NA | 2.83 |
| S7-final-viral-combined_k141_46216  full     | 1238  | No | NA | 0 | 0 | 1 | Low-quality    | Genome-fragment | NA | 1.11 |
| S11_k141_175229                              | 1008  | No | NA | 0 | 0 | 0 | Not-determined | Genome-fragment | NA | 0    |
| S11_k141_64765                               | 2631  | No | NA | 0 | 0 | 0 | Not-determined | Genome-fragment | NA | 0    |
| S11_k141_51214                               | 7051  | No | NA | 0 | 0 | 6 | Not-determined | Genome-fragment | NA | 0    |
| S11_k141_51219                               | 5074  | No | NA | 0 | 0 | 0 | Not-determined | Genome-fragment | NA | 0    |
| S11_k141_244593                              | 1142  | No | NA | 0 | 0 | 0 | Not-determined | Genome-fragment | NA | 0    |
| S11_k141_64777                               | 1798  | No | NA | 0 | 0 | 0 | Not-determined | Genome-fragment | NA | 0    |
| S11_k141_295855                              | 1125  | No | NA | 0 | 0 | 0 | Not-determined | Genome-fragment | NA | 0    |
| S11_k141_175294                              | 1003  | No | NA | 0 | 0 | 1 | Not-determined | Genome-fragment | NA | 0    |
| S11_k141_106732                              | 3295  | No | NA | 0 | 0 | 2 | Not-determined | Genome-fragment | NA | 0    |
| S11_k141_10024                               | 2283  | No | NA | 0 | 0 | 2 | Not-determined | Genome-fragment | NA | 0    |
| S11_k141_91388                               | 1471  | No | NA | 0 | 0 | 1 | Not-determined | Genome-fragment | NA | 0    |
| S11_k141_119381                              | 1046  | No | NA | 0 | 0 | 1 | Not-determined | Genome-fragment | NA | 0    |
| S11_k141_188491                              | 1075  | No | NA | 0 | 0 | 1 | Not-determined | Genome-fragment | NA | 0    |
| S11_k141_325535                              | 2195  | No | NA | 0 | 0 | 1 | Not-determined | Genome-fragment | NA | 0    |
| S11_k141_77928                               | 1448  | No | NA | 0 | 0 | 1 | Not-determined | Genome-fragment | NA | 0    |
| S11_k141_106772                              | 7204  | No | NA | 0 | 0 | 0 | Not-determined | Genome-fragment | NA | 0    |
| S11_k141_37405                               | 1282  | No | NA | 0 | 0 | 0 | Not-determined | Genome-fragment | NA | 0    |
| S11_k141_32205                               | 3640  | No | NA | 0 | 0 | 0 | Not-determined | Genome-fragment | NA | 0    |
| S7_k141_243336                               | 1238  | No | NA | 0 | 0 | 3 | Low-quality    | Genome-fragment | NA | 3.23 |
| S11_k141_106812                              | 2519  | No | NA | 0 | 0 | 1 | Not-determined | Genome-fragment | NA | 0    |
| S11_k141_175439                              | 1012  | No | NA | 0 | 0 | 1 | Not-determined | Genome-fragment | NA | 0    |
| S17-final-viral-combined_k141_125357  full   | 1238  | No | NA | 0 | 0 | 2 | Low-quality    | Genome-fragment | NA | 0.9  |
| S11_k141_106832                              | 3963  | No | NA | 0 | 0 | 1 | Not-determined | Genome-fragment | NA | 0    |
| S17-final-viral-combined_k141_83549  full    | 1238  | No | NA | 0 | 0 | 0 | Low-quality    | Genome-fragment | NA | 1.35 |
| S11_k141_51400                               | 5370  | No | NA | 0 | 0 | 3 | Not-determined | Genome-fragment | NA | 0    |
| S17-final-viral-combined_k141_60519  full    | 1238  | No | NA | 1 | 0 | 0 | Low-quality    | Genome-fragment | NA | 2.55 |
| S11_k141_313382                              | 2284  | No | NA | 0 | 0 | 2 | Not-determined | Genome-fragment | NA | 0    |
| S12-final-viral-combined_k141_331875  H2gene | 1218  | No | NA | 0 | 0 | 0 | Low-quality    | Genome-fragment | NA | 9.62 |
| S11_k141_298787                              | 1911  | No | NA | 0 | 0 | 2 | Not-determined | Genome-fragment | NA | 0    |
| S11_k141_22345                               | 1155  | No | NA | 0 | 0 | 2 | Not-determined | Genome-fragment | NA | 0    |
| S4-final-viral-combined_k141_34844  full     | 1218  | No | NA | 2 | 0 | 0 | Low-quality    | Genome-fragment | NA | 3.47 |
| S11_k141_313402                              | 2209  | No | NA | 0 | 0 | 2 | Not-determined | Genome-fragment | NA | 0    |
| S11_k141_10123                               | 1229  | No | NA | 0 | 0 | 1 | Not-determined | Genome-fragment | NA | 0    |
| S11_k141_220488                              | 1161  | No | NA | 0 | 0 | 0 | Not-determined | Genome-fragment | NA | 0    |
| S11_k141_10144                               | 1180  | No | NA | 0 | 0 | 1 | Not-determined | Genome-fragment | NA | 0    |
| S11_k141_119535                              | 4371  | No | NA | 0 | 0 | 2 | Not-determined | Genome-fragment | NA | 0    |
| S11_k141_313467                              | 1041  | No | NA | 0 | 0 | 0 | Not-determined | Genome-fragment | NA | 0    |
| S11_k141_258391                              | 1027  | No | NA | 0 | 0 | 1 | Not-determined | Genome-fragment | NA | 0    |
| S11_k141_271385                              | 1935  | No | NA | 0 | 0 | 0 | Not-determined | Genome-fragment | NA | 0    |
| S11_k141_22475                               | 1231  | No | NA | 0 | 0 | 2 | Not-determined | Genome-fragment | NA | 0    |
| S11_k141_78266                               | 1817  | No | NA | 0 | 0 | 0 | Not-determined | Genome-fragment | NA | 0    |
| S11_k141_271461                              | 1320  | No | NA | 0 | 0 | 1 | Not-determined | Genome-fragment | NA | 0    |
| S4-final-viral-combined_k141_147053  full    | 1238  | No | NA | 0 | 0 | 2 | Low-quality    | Genome-fragment | NA | 1.16 |
| S8-final-viral-combined_k141_38942  full     | 1238  | No | NA | 0 | 0 | 0 | Low-quality    | Genome-fragment | NA | 2.97 |
| S11_k141_188691                              | 1448  | No | NA | 0 | 0 | 1 | Not-determined | Genome-fragment | NA | 0    |
| S11_k141_188697                              | 1069  | No | NA | 0 | 0 | 1 | Not-determined | Genome-fragment | NA | 0    |
| S11_k141_323756                              | 1462  | No | NA | 0 | 0 | 1 | Not-determined | Genome-fragment | NA | 0    |
| S11_k141_175671                              | 1024  | No | NA | 0 | 0 | 0 | Not-determined | Genome-fragment | NA | 0    |
| S11_k141_258513                              | 1008  | No | NA | 0 | 0 | 0 | Not-determined | Genome-fragment | NA | 0    |
| S8-final-viral-combined_k141_113379  full    | 1238  | No | NA | 0 | 0 | 2 | Low-quality    | Genome-fragment | NA | 0.66 |
| S11_k141_51724                               | 1547  | No | NA | 0 | 0 | 1 | Not-determined | Genome-fragment | NA | 0    |
| S11_k141_78135                               | 6288  | No | NA | 0 | 0 | 3 | Not-determined | Genome-fragment | NA | 0    |
| S11_k141_188763                              | 1305  | No | NA | 0 | 0 | 1 | Not-determined | Genome-fragment | NA | 0    |
| S11_k141_271551                              | 1033  | No | NA | 0 | 0 | 1 | Not-determined | Genome-fragment | NA | 0    |
| S9-final-viral-combined_k141_55092  full     | 1239  | No | NA | 0 | 0 | 0 | Low-quality    | Genome-fragment | NA | 1.91 |
| S11_k141_230715                              | 1042  | No | NA | 0 | 0 | 0 | Not-determined | Genome-fragment | NA | 0    |
| S11_k141_133089                              | 2354  | No | NA | 0 | 0 | 0 | Not-determined | Genome-fragment | NA | 0    |
| S11_k141_299016                              | 2991  | No | NA | 0 | 0 | 1 | Not-determined | Genome-fragment | NA | 0    |
| S11_k141_217004                              | 5728  | No | NA | 0 | 0 | 3 | Not-determined | Genome-fragment | NA | 0    |
| S11-final-viral-combined_k141_95848  full    | 1239  | No | NA | 0 | 0 | 0 | Low-quality    | Genome-fragment | NA | 2.31 |
| S11_k141_107189                              | 3817  | No | NA | 0 | 0 | 1 | Not-determined | Genome-fragment | NA | 0    |
| S11_k141_175792                              | 2178  | No | NA | 0 | 0 | 1 | Not-determined | Genome-fragment | NA | 0    |
| S17-final-viral-combined_k141_257896  full   | 1239  | No | NA | 0 | 0 | 1 | Low-quality    | Genome-fragment | NA | 0.59 |
| S11_k141_37858                               | 1140  | No | NA | 0 | 0 | 1 | Not-determined | Genome-fragment | NA | 0    |
| S11_k141_202984                              | 1905  | No | NA | 0 | 0 | 1 | Not-determined | Genome-fragment | NA | 0    |
| S17-final-viral-combined_k141_163119  full   | 1239  | No | NA | 0 | 0 | 0 | Low-quality    | Genome-fragment | NA | 0.89 |
| S11_k141_286045                              | 1177  | No | NA | 0 | 0 | 0 | Not-determined | Genome-fragment | NA | 0    |
| S11_k141_22797                               | 1122  | No | NA | 0 | 0 | 1 | Not-determined | Genome-fragment | NA | 0    |
| S11_k141_286065                              | 1066  | No | NA | 0 | 0 | 0 | Not-determined | Genome-fragment | NA | 0    |
| S11_k141_188942                              | 2904  | No | NA | 0 | 0 | 0 | Not-determined | Genome-fragment | NA | 0    |
| S11_k141_203053                              | 1141  | No | NA | 0 | 0 | 1 | Not-determined | Genome-fragment | NA | 0    |
| S11_k141_188974                              | 1130  | No | NA | 0 | 0 | 1 | Not-determined | Genome-fragment | NA | 0    |
| S11_k141_325956                              | 2321  | No | NA | 0 | 0 | 0 | Not-determined | Genome-fragment | NA | 0    |
| S12-final-viral-combined_k141_20393  full    | 1239  | No | NA | 0 | 0 | 1 | Low-quality    | Genome-fragment | NA | 0.87 |
| S11_k141_325968                              | 13756 | No | NA | 0 | 0 | 4 | Not-determined | Genome-fragment | NA | 0    |
| S11_k141_217188                              | 1483  | No | NA | 0 | 0 | 1 | Not-determined | Genome-fragment | NA | 0    |
| S11_k141_258765                              | 1086  | No | NA | 0 | 0 | 0 | Not-determined | Genome-fragment | NA | 0    |
| S11_k141_299273                              | 1141  | No | NA | 0 | 0 | 0 | Not-determined | Genome-fragment | NA | 0    |
| S11_k141_245235                              | 1687  | No | NA | 0 | 0 | 3 | Not-determined | Genome-fragment | NA | 0    |
| S11_k141_325998                              | 1041  | No | NA | 0 | 0 | 2 | Not-determined | Genome-fragment | NA | 0    |
| S11_k141_119974                              | 1245  | No | NA | 0 | 0 | 1 | Not-determined | Genome-fragment | NA | 0    |
| S12_k141_287867                              | 1239  | No | NA | 0 | 0 | 0 | Low-quality    | Genome-fragment | NA | 2.2  |
| S2-final-viral-combined_k141_17602  H2gene   | 1239  | No | NA | 2 | 0 | 0 | Low-quality    | Genome-fragment | NA | 4.51 |
| S11_k141_189035                              | 1041  | No | NA | 0 | 0 | 0 | Not-determined | Genome-fragment | NA | 0    |
| S11_k141_22882                               |       |    |    |   |   |   |                |                 |    |      |



|                                      |       |    |    |   |    |                |                 |    |      |
|--------------------------------------|-------|----|----|---|----|----------------|-----------------|----|------|
| S11_k141_176327                      | 1857  | No | NA | 0 | 1  | Not-determined | Genome-fragment | NA | 0    |
| S11_k141_272042                      | 7974  | No | NA | 0 | 1  | Not-determined | Genome-fragment | NA | 0    |
| S4_k141_35287                        | 1240  | No | NA | 0 | 0  | Low-quality    | Genome-fragment | NA | 1.24 |
| S8-final-viral-combined_k141_245197  | 1240  | No | NA | 0 | 0  | Low-quality    | Genome-fragment | NA | 3.41 |
| S11_k141_38455                       | 1202  | No | NA | 0 | 0  | Not-determined | Genome-fragment | NA | 0    |
| S11_k141_217562                      | 1315  | No | NA | 0 | 2  | Not-determined | Genome-fragment | NA | 0    |
| S11_k141_78886                       | 1145  | No | NA | 0 | 1  | Not-determined | Genome-fragment | NA | 0    |
| S1-final-viral-combined_k141_321653  | 1241  | No | NA | 0 | 0  | Low-quality    | Genome-fragment | NA | 3.35 |
| S11_k141_217596                      | 1542  | No | NA | 0 | 0  | Not-determined | Genome-fragment | NA | 0    |
| S1-final-viral-combined_k141_8498    | 1241  | No | NA | 0 | 0  | Low-quality    | Genome-fragment | NA | 2.2  |
| S11_k141_272105                      | 16657 | No | NA | 0 | 12 | Not-determined | Genome-fragment | NA | 0    |
| S11_k141_29539                       | 1030  | No | NA | 0 | 1  | Not-determined | Genome-fragment | NA | 0    |
| S11_k141_10911                       | 1074  | No | NA | 0 | 1  | Not-determined | Genome-fragment | NA | 0    |
| S11_k141_189371                      | 3670  | No | NA | 0 | 1  | Not-determined | Genome-fragment | NA | 0    |
| S11_k141_38531                       | 1353  | No | NA | 0 | 2  | Not-determined | Genome-fragment | NA | 0    |
| S11_k141_298810                      | 1469  | No | NA | 0 | 0  | Not-determined | Genome-fragment | NA | 0    |
| S11_k141_38554                       | 1443  | No | NA | 0 | 4  | Not-determined | Genome-fragment | NA | 0    |
| S11_k141_162643                      | 1000  | No | NA | 0 | 2  | Not-determined | Genome-fragment | NA | 0    |
| S11_k141_29032                       | 1006  | No | NA | 0 | 1  | Not-determined | Genome-fragment | NA | 0    |
| S11_k141_299864                      | 2172  | No | NA | 0 | 1  | Not-determined | Genome-fragment | NA | 0    |
| S11_k141_259360                      | 1401  | No | NA | 0 | 4  | Not-determined | Genome-fragment | NA | 0    |
| S11_k141_176400                      | 1571  | No | NA | 0 | 1  | Not-determined | Genome-fragment | NA | 0    |
| S11_k141_120259                      | 2207  | No | NA | 0 | 0  | Not-determined | Genome-fragment | NA | 0    |
| S11_k141_133991                      | 1098  | No | NA | 0 | 1  | Not-determined | Genome-fragment | NA | 0    |
| S17-final-viral-combined_k141_119071 | 1241  | No | NA | 0 | 0  | Low-quality    | Genome-fragment | NA | 0.82 |
| S11_k141_134004                      | 1710  | No | NA | 0 | 1  | Not-determined | Genome-fragment | NA | 0    |
| S17-final-viral-combined_k141_143004 | 1241  | No | NA | 1 | 0  | Low-quality    | Genome-fragment | NA | 3.49 |
| S11_k141_286748                      | 2022  | No | NA | 0 | 2  | Not-determined | Genome-fragment | NA | 0    |
| S17-final-viral-combined_k141_109414 | 1241  | No | NA | 0 | 0  | Low-quality    | Genome-fragment | NA | 2.63 |
| S11_k141_217700                      | 1149  | No | NA | 0 | 0  | Not-determined | Genome-fragment | NA | 0    |
| S11_k141_52760                       | 1009  | No | NA | 0 | 1  | Not-determined | Genome-fragment | NA | 0    |
| S11_k141_21477                       | 2050  | No | NA | 0 | 1  | Not-determined | Genome-fragment | NA | 0    |
| S12-final-viral-combined_k141_61405  | 1241  | No | NA | 2 | 0  | Low-quality    | Genome-fragment | NA | 2.66 |
| S11_k141_79182                       | 1244  | No | NA | 0 | 0  | Not-determined | Genome-fragment | NA | 0    |
| S11_k141_176640                      | 1149  | No | NA | 0 | 2  | Not-determined | Genome-fragment | NA | 0    |
| S12-final-viral-combined_k141_212896 | 1241  | No | NA | 0 | 0  | Low-quality    | Genome-fragment | NA | 3.07 |
| S11_k141_108102                      | 3027  | No | NA | 0 | 1  | Not-determined | Genome-fragment | NA | 0    |
| S12_k141_323563                      | 1241  | No | NA | 0 | 1  | Low-quality    | Genome-fragment | NA | 0.8  |
| S11_k141_11210                       | 1254  | No | NA | 0 | 0  | Not-determined | Genome-fragment | NA | 0    |
| S11_k141_134180                      | 1829  | No | NA | 0 | 0  | Not-determined | Genome-fragment | NA | 0    |
| S11_k141_203817                      | 1266  | No | NA | 0 | 1  | Not-determined | Genome-fragment | NA | 0    |
| S11_k141_316644                      | 1001  | No | NA | 0 | 0  | Not-determined | Genome-fragment | NA | 0    |
| S11_k141_326661                      | 3827  | No | NA | 0 | 4  | Not-determined | Genome-fragment | NA | 0    |
| S11_k141_120505                      | 4952  | No | NA | 0 | 2  | Not-determined | Genome-fragment | NA | 0    |
| S2_k141_99960                        | 1241  | No | NA | 0 | 0  | Low-quality    | Genome-fragment | NA | 2.99 |
| S11_k141_79316                       | 1050  | No | NA | 0 | 0  | Not-determined | Genome-fragment | NA | 0    |
| S11_k141_300179                      | 1398  | No | NA | 0 | 1  | Not-determined | Genome-fragment | NA | 0    |
| S11_k141_286979                      | 5397  | No | NA | 0 | 2  | Not-determined | Genome-fragment | NA | 0    |
| S11_k141_266984                      | 1043  | No | NA | 0 | 0  | Not-determined | Genome-fragment | NA | 0    |
| S11_k141_203924                      | 1313  | No | NA | 0 | 0  | Not-determined | Genome-fragment | NA | 0    |
| S11_k141_38940                       | 1192  | No | NA | 0 | 0  | Not-determined | Genome-fragment | NA | 0    |
| S11_k141_148902                      | 1262  | No | NA | 0 | 1  | Not-determined | Genome-fragment | NA | 0    |
| S11_k141_108236                      | 2090  | No | NA | 0 | 0  | Not-determined | Genome-fragment | NA | 0    |
| S11_k141_23607                       | 1377  | No | NA | 0 | 1  | Not-determined | Genome-fragment | NA | 0    |
| S11_k141_53001                       | 1700  | No | NA | 0 | 1  | Not-determined | Genome-fragment | NA | 0    |
| S11_k141_246159                      | 1143  | No | NA | 0 | 1  | Not-determined | Genome-fragment | NA | 2.51 |
| S11_k141_66478                       | 1039  | No | NA | 0 | 0  | Not-determined | Genome-fragment | NA | 0    |
| S11_k141_148956                      | 1051  | No | NA | 0 | 0  | Not-determined | Genome-fragment | NA | 0    |
| S2_k141_150633                       | 1241  | No | NA | 0 | 0  | Low-quality    | Genome-fragment | NA | 0.8  |
| S4-final-viral-combined_k141_143599  | 1241  | No | NA | 1 | 0  | Low-quality    | Genome-fragment | NA | 2.94 |
| S11_k141_246210                      | 1212  | No | NA | 0 | 0  | Not-determined | Genome-fragment | NA | 0    |
| S11_k141_316784                      | 4573  | No | NA | 0 | 2  | Not-determined | Genome-fragment | NA | 0    |
| S8-final-viral-combined_k141_78024   | 1241  | No | NA | 2 | 0  | Low-quality    | Genome-fragment | NA | 2.05 |
| S11_k141_319127                      | 1242  | No | NA | 0 | 0  | Low-quality    | Genome-fragment | NA | 2.13 |
| S1-final-viral-combined_k141_100712  | 1242  | No | NA | 0 | 0  | Low-quality    | Genome-fragment | NA | 2.51 |
| S11_k141_51337                       | 3481  | No | NA | 0 | 2  | Not-determined | Genome-fragment | NA | 0    |
| S11-final-viral-combined_k141_102843 | 1242  | No | NA | 0 | 0  | Low-quality    | Genome-fragment | NA | 5    |
| S8-final-viral-combined_k141_85250   | 1242  | No | NA | 0 | 0  | Low-quality    | Genome-fragment | NA | 0.99 |
| S7-final-viral-combined_k141_120748  | 1242  | No | NA | 0 | 1  | Low-quality    | Genome-fragment | NA | 0.98 |
| S11_k141_287146                      | 2322  | No | NA | 0 | 2  | Not-determined | Genome-fragment | NA | 0    |
| S7_k141_99173                        | 1242  | No | NA | 0 | 1  | Low-quality    | Genome-fragment | NA | 0.33 |
| S11_k141_108393                      | 1420  | No | NA | 0 | 1  | Not-determined | Genome-fragment | NA | 0    |
| S11_k141_120710                      | 3682  | No | NA | 0 | 0  | Not-determined | Genome-fragment | NA | 0    |
| S11_k141_23784                       | 4481  | No | NA | 0 | 3  | Not-determined | Genome-fragment | NA | 0    |
| S17-final-viral-combined_k141_202776 | 1242  | No | NA | 0 | 2  | Low-quality    | Genome-fragment | NA | 0.86 |
| S11_k141_300384                      | 2412  | No | NA | 0 | 1  | Not-determined | Genome-fragment | NA | 0    |
| S11_k141_272738                      | 1302  | No | NA | 0 | 1  | Not-determined | Genome-fragment | NA | 0    |
| S11_k141_246377                      | 1124  | No | NA | 0 | 0  | Not-determined | Genome-fragment | NA | 0    |
| S11_k141_176949                      | 5860  | No | NA | 0 | 1  | Not-determined | Genome-fragment | NA | 0    |
| S17-final-viral-combined_k141_5417   | 1242  | No | NA | 0 | 0  | Low-quality    | Genome-fragment | NA | 1.89 |
| S17-final-viral-combined_k141_66351  | 1242  | No | NA | 1 | 0  | Low-quality    | Genome-fragment | NA | 2    |
| S11_k141_300440                      | 1305  | No | NA | 0 | 1  | Not-determined | Genome-fragment | NA | 0    |
| S11_k141_314514                      | 1025  | No | NA | 0 | 0  | Not-determined | Genome-fragment | NA | 0    |
| S11_k141_108469                      | 1040  | No | NA | 0 | 1  | Not-determined | Genome-fragment | NA | 0    |
| S11_k141_30149                       | 2523  | No | NA | 0 | 0  | Not-determined | Genome-fragment | NA | 0    |
| S11_k141_246471                      | 1127  | No | NA | 0 | 1  | Not-determined | Genome-fragment | NA | 0    |
| S11_k141_287287                      | 1266  | No | NA | 0 | 1  | Not-determined | Genome-fragment | NA | 0    |
| S11_k141_79665                       | 1159  | No | NA | 0 | 1  | Not-determined | Genome-fragment | NA | 0    |
| S11_k141_66793                       | 1224  | No | NA | 0 | 1  | Not-determined | Genome-fragment | NA | 0    |
| S11_k141_115514                      | 2155  | No | NA | 0 | 1  | Not-determined | Genome-fragment | NA | 0    |
| S17_k141_247546                      | 1242  | No | NA | 0 | 0  | Low-quality    | Genome-fragment | NA | 2.92 |
| S11_k141_79679                       | 4049  | No | NA | 0 | 0  | Not-determined | Genome-fragment | NA | 0    |
| S11_k141_11529                       | 1012  | No | NA | 0 | 2  | Not-determined | Genome-fragment | NA | 0    |
| S11_k141_177089                      | 3450  | No | NA | 0 | 3  | Not-determined | Genome-fragment | NA | 0    |
| S11_k141_246544                      | 1906  | No | NA | 0 | 2  | Not-determined | Genome-fragment | NA | 0    |
| S11_k141_79732                       | 1279  | No | NA | 0 | 0  | Not-determined | Genome-fragment | NA | 0    |
| S11_k141_108644                      | 1397  | No | NA | 0 | 1  | Not-determined | Genome-fragment | NA | 0    |
| S11_k141_53283                       | 4311  | No | NA | 0 | 3  | Not-determined | Genome-fragment | NA | 0    |
| S11_k141_1109314                     | 1735  | No | NA | 0 | 0  | Not-determined | Genome-fragment | NA | 0    |
| S11_k141_246602                      | 1147  | No | NA | 0 | 1  | Not-determined | Genome-fragment | NA | 0    |
| S2-final-viral-combined_k141_192277  | 1242  | No | NA | 1 | 0  | Low-quality    | Genome-fragment | NA | 2.53 |
| S4-final-viral-combined_k141_164207  | 1242  | No | NA | 0 | 0  | Low-quality    | Genome-fragment | NA | 0.13 |
| S11_k141_218069                      | 1480  | No | NA | 0 | 1  | Not-determined | Genome-fragment | NA | 0    |
| S6-final-viral-combined_k141_129259  | 1242  | No | NA | 0 | 0  | Low-quality    | Genome-fragment | NA | 0.53 |
| S11_k141_177145                      | 1188  | No | NA | 0 | 2  | Not-determined | Genome-fragment | NA | 0    |
| S11_k141_23973                       | 1101  | No | NA | 0 | 1  | Not-determined | Genome-fragment | NA | 0    |
| S11_k141_121000                      | 2073  | No | NA | 0 | 3  | Not-determined | Genome-fragment | NA | 0    |
| S8_k141_54615                        | 1242  | No | NA | 1 | 0  | Low-quality    | Genome-fragment | NA | 2.22 |
| S11_k141_246639                      | 3850  | No | NA | 0 | 0  | Not-determined | Genome-fragment | NA | 0    |
| S11_k141_24017                       | 3174  | No | NA | 0 | 1  | Not-determined | Genome-fragment | NA | 0    |
| S11_k141_177192                      | 1158  | No | NA | 0 | 1  | Not-determined | Genome-fragment | NA | 0    |
| S11_k141_260030                      | 1184  | No | NA | 0 | 1  | Not-determined | Genome-fragment | NA | 0    |
| S11_k141_246666                      | 1248  | No | NA | 0 | 0  | Not-determined | Genome-fragment | NA | 0    |
| S11_k141_121021                      | 1060  | No | NA | 0 | 1  | Not-determined | Genome-fragment | NA | 0    |
| S11_k141_121026                      | 1159  | No | NA | 0 | 0  | Not-determined | Genome-fragment | NA | 0    |
| S11_k141_177243                      | 1947  | No | NA | 0 | 1  | Not-determined | Genome-fragment | NA | 0    |
| S11_k141_108786                      | 3065  | No | NA | 0 | 3  | Not-determined | Genome-fragment | NA | 0    |
| S11_k141_120050                      | 13936 | No | NA | 0 | 4  | Not-determined | Genome-fragment | NA | 0    |
| S11_k141_314693                      | 1348  | No | NA | 0 | 0  | Not-determined | Genome-fragment | NA | 0    |
| S11_k141_11780                       | 1830  | No | NA | 0 | 0  | Not-determined | Genome-fragment | NA | 0    |
| S11_k141_21789                       | 1537  | No | NA | 0 | 0  | Not-determined | Genome-fragment | NA | 0    |
| S8-final-viral-combined_k141_26848   | 1243  | No | NA | 0 | 0  | Low-quality    | Genome-fragment | NA | 1.75 |
| S11_k141_108832                      | 2630  | No | NA | 0 | 3  | Not-determined | Genome-fragment | NA | 0    |
| S9_k141_12534                        | 1243  | No | NA | 0 | 1  | Low-quality    | Genome-fragment | NA | 0.3  |
| S11-final-viral-combined_k141_84223  | 1243  | No | NA | 0 | 0  | Low-quality    | Genome-fragment | NA | 2.59 |
| S11_k141_94148                       | 1394  | No | NA | 0 | 1  | Not-determined | Genome-fragment | NA | 0    |
| S11_k141_134846                      | 1074  | No | NA | 0 | 1  | Not-determined | Genome-fragment | NA | 0    |
| S11_k141_162577                      | 1006  | No | NA | 0 | 1  | Not-determined | Genome-fragment | NA | 0    |
| S11_k141_79996                       | 2385  | No | NA | 0 | 1  | Not-determined | Genome-fragment | NA | 0    |
| S11_k141_24255                       | 4156  | No | NA | 0 | 1  | Not-determined | Genome-fragment | NA | 0    |
| S11_k141_134883                      | 3690  | No | NA | 0 | 1  | Not-determined | Genome-fragment | NA | 2.81 |
| S11-final-viral-combined_k141_274560 | 1243  | No | NA | 2 | 0  | Low-quality    | Genome-fragment | NA | 0.59 |
| S11_k141_306871                      | 1243  | No | NA | 0 | 1  | Low-quality    | Genome-fragment | NA | 0    |
| S11_k141_260222                      | 1331  | No | NA | 0 | 1  | Not-determined | Genome-fragment | NA | 0    |
| S11_k141_90060                       | 1126  | No | NA | 0 | 0  | Not-determined | Genome-fragment | NA | 0    |
| S11_k141_287630                      | 1510  | No | NA | 0 | 2  | Not-determined | Genome-fragment | NA | 0    |
| S11_k141_39648                       | 1580  | No | NA | 0 | 1  | Not-determined | Genome-fragment | NA | 0    |
| S1_k141_313080                       | 1243  | No | NA | 0 | 0  | Low-quality    | Genome-fragment | NA | 1.19 |
| S11_k141_53654                       | 3340  | No | NA | 0 | 0  | Not-determined | Genome-fragment | NA | 0    |
| S5-final-viral-combined_k141_56285   | 1243  | No | NA | 0 | 0  | Low-quality    | Genome-fragment | NA | 1.86 |
| S11_k141_134977                      | 5032  | No | NA | 0 | 1  | Not-determined | Genome-fragment | NA | 0    |
| S11_k141_163884                      | 9784  | No | NA | 0 | 1  | Not-determined | Genome-fragment | NA | 0    |
| S7-final-viral-combined_k141_243892  | 1243  | No | NA | 0 | 0  | Low-quality    | Genome-fragment | NA | 1.69 |
| S11_k141_135007                      | 4722  | No | NA | 0 | 3  | Not-determined | Genome-fragment | NA | 0    |
| S11_k141_135014                      | 1216  | No | NA | 0 | 0  | Not-determined | Genome-fragment | NA | 0    |
| S11_k141_327436                      | 1029  |    |    |   |    |                |                 |    |      |



|                                             |       |    |    |   |    |                |                 |      |   |
|---------------------------------------------|-------|----|----|---|----|----------------|-----------------|------|---|
| S1-final-viral-combined_k141_104828]]full   | 1244  | No | NA | 0 | 0  | Low-quality    | Genome-fragment | 2.15 | 0 |
| S11_k141_317783                             | 1343  | No | NA | 0 | 2  | Not-determined | Genome-fragment | NA   | 0 |
| S1-final-viral-combined_k141_178208]]full   | 1244  | No | NA | 0 | 0  | Low-quality    | Genome-fragment | 2.98 | 0 |
| S11_k141_12231                              | 1540  | No | NA | 0 | 1  | Not-determined | Genome-fragment | NA   | 0 |
| S11_k141_121674                             | 1372  | No | NA | 0 | 1  | Not-determined | Genome-fragment | NA   | 0 |
| S1_k141_361294                              | 1244  | No | NA | 0 | 0  | Low-quality    | Genome-fragment | 1.42 | 0 |
| S1_k141_209013                              | 1244  | No | NA | 0 | 0  | Low-quality    | Genome-fragment | 3.37 | 0 |
| S11_k141_40114                              | 3697  | No | NA | 0 | 2  | Not-determined | Genome-fragment | NA   | 0 |
| S11_k141_317748                             | 1510  | No | NA | 0 | 0  | Not-determined | Genome-fragment | NA   | 0 |
| S11_k141_260610                             | 1142  | No | NA | 0 | 0  | Not-determined | Genome-fragment | NA   | 0 |
| S11_k141_24709                              | 2224  | No | NA | 0 | 1  | Not-determined | Genome-fragment | NA   | 0 |
| S11_k141_24733                              | 1574  | No | NA | 0 | 2  | Not-determined | Genome-fragment | NA   | 0 |
| S11_k141_67487                              | 2666  | No | NA | 0 | 2  | Not-determined | Genome-fragment | NA   | 0 |
| S11_k141_327800                             | 2100  | No | NA | 0 | 1  | Not-determined | Genome-fragment | NA   | 0 |
| S11_k141_218793                             | 4240  | No | NA | 0 | 3  | Not-determined | Genome-fragment | NA   | 0 |
| S11_k141_260706                             | 1154  | No | NA | 0 | 0  | Not-determined | Genome-fragment | NA   | 0 |
| S11_k141_24801                              | 1167  | No | NA | 0 | 2  | Not-determined | Genome-fragment | NA   | 0 |
| S11_k141_260725                             | 1408  | No | NA | 0 | 1  | Not-determined | Genome-fragment | NA   | 0 |
| S11_k141_67558                              | 1462  | No | NA | 0 | 1  | Not-determined | Genome-fragment | NA   | 0 |
| S11_k141_12432                              | 1530  | No | NA | 0 | 0  | Not-determined | Genome-fragment | NA   | 0 |
| S11_k141_53993                              | 1065  | No | NA | 0 | 2  | Not-determined | Genome-fragment | NA   | 0 |
| S11_k141_260756                             | 1044  | No | NA | 0 | 0  | Not-determined | Genome-fragment | NA   | 0 |
| S11_k141_247363                             | 1125  | No | NA | 0 | 1  | Not-determined | Genome-fragment | NA   | 0 |
| S5-final-viral-combined_k141_94576]]full    | 1244  | No | NA | 1 | 0  | Low-quality    | Genome-fragment | 0.85 | 0 |
| S11_k141_54105                              | 1209  | No | NA | 0 | 0  | Not-determined | Genome-fragment | NA   | 0 |
| S7-final-viral-combined_k141_189787]]full   | 1244  | No | NA | 0 | 0  | Low-quality    | Genome-fragment | 2.44 | 0 |
| S11_k141_109518                             | 2607  | No | NA | 0 | 1  | Not-determined | Genome-fragment | NA   | 0 |
| S11_k141_54123                              | 1616  | No | NA | 0 | 0  | Not-determined | Genome-fragment | NA   | 0 |
| S11_k141_327862                             | 1456  | No | NA | 0 | 1  | Not-determined | Genome-fragment | NA   | 0 |
| S11_k141_301185                             | 1244  | No | NA | 0 | 2  | Not-determined | Genome-fragment | NA   | 0 |
| S11_k141_178105                             | 1791  | No | NA | 0 | 2  | Not-determined | Genome-fragment | NA   | 0 |
| S11_k141_1510292                            | 1511  | No | NA | 0 | 0  | Not-determined | Genome-fragment | NA   | 0 |
| S11_k141_273733                             | 1161  | No | NA | 0 | 0  | Not-determined | Genome-fragment | NA   | 0 |
| S7_k141_166795                              | 1244  | No | NA | 0 | 0  | Low-quality    | Genome-fragment | 1.55 | 0 |
| S17-final-viral-combined_k141_253647]]full  | 1244  | No | NA | 1 | 0  | Low-quality    | Genome-fragment | 2.45 | 0 |
| S11_k141_24911                              | 1272  | No | NA | 0 | 0  | Not-determined | Genome-fragment | NA   | 0 |
| S11_k141_12603                              | 1988  | No | NA | 0 | 2  | Not-determined | Genome-fragment | NA   | 0 |
| S11_k141_231379                             | 12033 | No | NA | 0 | 4  | Not-determined | Genome-fragment | NA   | 0 |
| S17-k141_254861                             | 1244  | No | NA | 0 | 0  | Low-quality    | Genome-fragment | 1.74 | 0 |
| S12-final-viral-combined_k141_387081]]full  | 1244  | No | NA | 0 | 0  | Low-quality    | Genome-fragment | 2.34 | 0 |
| S11_k141_288352                             | 1180  | No | NA | 0 | 2  | Not-determined | Genome-fragment | NA   | 0 |
| S11_k141_191030                             | 1810  | No | NA | 0 | 2  | Not-determined | Genome-fragment | NA   | 0 |
| S11_k141_288369                             | 1710  | No | NA | 0 | 1  | Not-determined | Genome-fragment | NA   | 0 |
| S11_k141_121639                             | 1211  | No | NA | 0 | 1  | Not-determined | Genome-fragment | NA   | 0 |
| S12-final-viral-combined_k141_243985]]full  | 1244  | No | NA | 0 | 0  | Low-quality    | Genome-fragment | 0.89 | 0 |
| S11_k141_109691                             | 1486  | No | NA | 0 | 1  | Not-determined | Genome-fragment | NA   | 0 |
| S11_k141_164316                             | 1740  | No | NA | 0 | 0  | Not-determined | Genome-fragment | NA   | 0 |
| S11_k141_261021                             | 2870  | No | NA | 0 | 1  | Not-determined | Genome-fragment | NA   | 0 |
| S11_k141_121683                             | 3017  | No | NA | 0 | 2  | Not-determined | Genome-fragment | NA   | 0 |
| S11_k141_67891                              | 3072  | No | NA | 0 | 3  | Not-determined | Genome-fragment | NA   | 0 |
| S11_k141_219045                             | 4213  | No | NA | 0 | 2  | Not-determined | Genome-fragment | NA   | 0 |
| S11_k141_67909                              | 1158  | No | NA | 0 | 1  | Not-determined | Genome-fragment | NA   | 0 |
| S11_k141_233239                             | 1442  | No | NA | 0 | 0  | Not-determined | Genome-fragment | NA   | 0 |
| S11_k141_328028                             | 3809  | No | NA | 0 | 0  | Not-determined | Genome-fragment | NA   | 0 |
| S12-final-viral-combined_k141_69093]]H2gene | 1244  | No | NA | 1 | 0  | Low-quality    | Genome-fragment | 2.68 | 0 |
| S11_k141_164413                             | 1272  | No | NA | 0 | 3  | Not-determined | Genome-fragment | NA   | 0 |
| S11_k141_40617                              | 1109  | No | NA | 0 | 1  | Not-determined | Genome-fragment | NA   | 0 |
| S11_k141_301394                             | 2043  | No | NA | 0 | 2  | Not-determined | Genome-fragment | NA   | 0 |
| S11_k141_205109                             | 1162  | No | NA | 0 | 2  | Not-determined | Genome-fragment | NA   | 0 |
| S11_k141_191150                             | 1255  | No | NA | 0 | 0  | Not-determined | Genome-fragment | NA   | 0 |
| S12_k141_90111                              | 1244  | No | NA | 1 | 0  | Low-quality    | Genome-fragment | 3.22 | 0 |
| S11_k141_150562                             | 2144  | No | NA | 0 | 1  | Not-determined | Genome-fragment | NA   | 0 |
| S11_k141_178374                             | 1812  | No | NA | 0 | 0  | Not-determined | Genome-fragment | NA   | 0 |
| S11_k141_233331                             | 9311  | No | NA | 0 | 18 | Not-determined | Genome-fragment | NA   | 0 |
| S2-final-viral-combined_k141_7737]]full     | 1244  | No | NA | 0 | 0  | Low-quality    | Genome-fragment | 2.8  | 0 |
| S11_k141_164441                             | 1094  | No | NA | 0 | 1  | Not-determined | Genome-fragment | NA   | 0 |
| S4_k141_29431                               | 1244  | No | NA | 1 | 0  | Low-quality    | Genome-fragment | 3.57 | 0 |
| S11_k141_151922                             | 1593  | No | NA | 0 | 0  | Not-determined | Genome-fragment | NA   | 0 |
| S6-final-viral-combined_k141_85567]]full    | 1244  | No | NA | 0 | 1  | Low-quality    | Genome-fragment | 2.49 | 0 |
| S11_k141_95138                              | 3834  | No | NA | 0 | 2  | Not-determined | Genome-fragment | NA   | 0 |
| S11_k141_178425                             | 1872  | No | NA | 0 | 0  | Not-determined | Genome-fragment | NA   | 0 |
| S8-final-viral-combined_k141_13154]]full    | 1244  | No | NA | 0 | 0  | Low-quality    | Genome-fragment | 1.76 | 0 |
| S11_k141_68095                              | 1512  | No | NA | 0 | 0  | Not-determined | Genome-fragment | NA   | 0 |
| S8-final-viral-combined_k141_108645]]full   | 1244  | No | NA | 0 | 0  | Low-quality    | Genome-fragment | 0.78 | 0 |
| S9_k141_23515                               | 1245  | No | NA | 0 | 0  | Low-quality    | Genome-fragment | 3.66 | 0 |
| S11-final-viral-combined_k141_278457]]full  | 1245  | No | NA | 0 | 1  | Low-quality    | Genome-fragment | 1.54 | 0 |
| S1-final-viral-combined_k141_194042]]full   | 1245  | No | NA | 0 | 1  | Low-quality    | Genome-fragment | 7.48 | 0 |
| S11_k141_288655                             | 1776  | No | NA | 0 | 1  | Not-determined | Genome-fragment | NA   | 0 |
| S11_k141_68181                              | 1268  | No | NA | 0 | 1  | Not-determined | Genome-fragment | NA   | 0 |
| S11_k141_150759                             | 2653  | No | NA | 0 | 1  | Not-determined | Genome-fragment | NA   | 0 |
| S11_k141_219251                             | 1074  | No | NA | 0 | 1  | Not-determined | Genome-fragment | NA   | 0 |
| S11_k141_261243                             | 3031  | No | NA | 0 | 0  | Not-determined | Genome-fragment | NA   | 0 |
| S11_k141_164606                             | 1393  | No | NA | 0 | 1  | Not-determined | Genome-fragment | NA   | 0 |
| S11_k141_40904                              | 1913  | No | NA | 0 | 1  | Not-determined | Genome-fragment | NA   | 0 |
| S1-final-viral-combined_k141_376156]]H2gene | 1245  | No | NA | 0 | 0  | Low-quality    | Genome-fragment | 0.86 | 0 |
| S11_k141_274188                             | 1892  | No | NA | 0 | 1  | Not-determined | Genome-fragment | NA   | 0 |
| S1-final-viral-combined_k141_15883]]H2gene  | 1245  | No | NA | 2 | 0  | Low-quality    | Genome-fragment | 3.16 | 0 |
| S11_k141_215827                             | 1368  | No | NA | 0 | 1  | Not-determined | Genome-fragment | NA   | 0 |
| S1_k141_306582                              | 1245  | No | NA | 0 | 2  | Low-quality    | Genome-fragment | 0.58 | 0 |
| S11_k141_233587                             | 1308  | No | NA | 0 | 0  | Not-determined | Genome-fragment | NA   | 0 |
| S17-final-viral-combined_k141_203812]]full  | 1245  | No | NA | 0 | 0  | Low-quality    | Genome-fragment | 2.08 | 0 |
| S17-final-viral-combined_k141_38866]]H2gene | 1245  | No | NA | 0 | 0  | Low-quality    | Genome-fragment | 3.66 | 0 |
| S17-k141_237720                             | 1245  | No | NA | 1 | 0  | Low-quality    | Genome-fragment | 1.59 | 0 |
| S11_k141_80997                              | 15746 | No | NA | 0 | 6  | Not-determined | Genome-fragment | NA   | 0 |
| S11_k141_54715                              | 1880  | No | NA | 0 | 1  | Not-determined | Genome-fragment | NA   | 0 |
| S17-k141_108394                             | 1245  | No | NA | 0 | 0  | Low-quality    | Genome-fragment | 1.87 | 0 |
| S11_k141_54756                              | 1589  | No | NA | 0 | 1  | Not-determined | Genome-fragment | NA   | 0 |
| S11_k141_288772                             | 1642  | No | NA | 0 | 0  | Not-determined | Genome-fragment | NA   | 0 |
| S11_k141_124002                             | 7036  | No | NA | 0 | 2  | Not-determined | Genome-fragment | NA   | 0 |
| S12-final-viral-combined_k141_335813]]full  | 1245  | No | NA | 0 | 0  | Low-quality    | Genome-fragment | 1.71 | 0 |
| S11_k141_150932                             | 2684  | No | NA | 0 | 1  | Not-determined | Genome-fragment | NA   | 0 |
| S12-final-viral-combined_k141_379982]]full  | 1245  | No | NA | 0 | 0  | Low-quality    | Genome-fragment | 2.48 | 0 |
| S11_k141_191526                             | 1052  | No | NA | 0 | 1  | Not-determined | Genome-fragment | NA   | 0 |
| S11_k141_95486                              | 1338  | No | NA | 0 | 1  | Not-determined | Genome-fragment | NA   | 0 |
| S12_k141_316090                             | 1245  | No | NA | 1 | 0  | Low-quality    | Genome-fragment | 2.96 | 0 |
| S11_k141_13259                              | 1908  | No | NA | 0 | 1  | Not-determined | Genome-fragment | NA   | 0 |
| S11_k141_95499                              | 1502  | No | NA | 0 | 0  | Not-determined | Genome-fragment | NA   | 0 |
| S11_k141_164833                             | 4605  | No | NA | 0 | 4  | Not-determined | Genome-fragment | NA   | 0 |
| S11_k141_191560                             | 3972  | No | NA | 0 | 2  | Not-determined | Genome-fragment | NA   | 0 |
| S11_k141_191569                             | 1207  | No | NA | 0 | 0  | Not-determined | Genome-fragment | NA   | 0 |
| S2_k141_240119                              | 1245  | No | NA | 0 | 0  | Low-quality    | Genome-fragment | 2.44 | 0 |
| S6-final-viral-combined_k141_3558]]full     | 1245  | No | NA | 0 | 2  | Low-quality    | Genome-fragment | 1.52 | 0 |
| S11_k141_136316                             | 1132  | No | NA | 0 | 2  | Not-determined | Genome-fragment | NA   | 0 |
| S11_k141_121517                             | 1872  | No | NA | 0 | 2  | Not-determined | Genome-fragment | NA   | 0 |
| S9-final-viral-combined_k141_70474]]full    | 1246  | No | NA | 0 | 0  | Low-quality    | Genome-fragment | 2.08 | 0 |
| S11_k141_54883                              | 1018  | No | NA | 0 | 0  | Not-determined | Genome-fragment | NA   | 0 |
| S11_k141_205476                             | 1159  | No | NA | 0 | 0  | Not-determined | Genome-fragment | NA   | 0 |
| S11-final-viral-combined_k141_97491]]full   | 1246  | No | NA | 0 | 0  | Low-quality    | Genome-fragment | 2.57 | 0 |
| S11_k141_54900                              | 3683  | No | NA | 0 | 2  | Not-determined | Genome-fragment | NA   | 0 |
| S11_k141_81187                              | 1003  | No | NA | 0 | 0  | Not-determined | Genome-fragment | NA   | 0 |
| S11_k141_191712                             | 1724  | No | NA | 0 | 0  | Not-determined | Genome-fragment | NA   | 0 |
| S11_k141_288977                             | 2884  | No | NA | 0 | 4  | Not-determined | Genome-fragment | NA   | 0 |
| S1-final-viral-combined_k141_193460]]full   | 1246  | No | NA | 2 | 0  | Low-quality    | Genome-fragment | 2.92 | 0 |
| S11_k141_41200                              | 1700  | No | NA | 0 | 0  | Not-determined | Genome-fragment | NA   | 0 |
| S11_k141_191816                             | 1261  | No | NA | 0 | 1  | Not-determined | Genome-fragment | NA   | 0 |
| S1-final-viral-combined_k141_150924]]H2gene | 1246  | No | NA | 1 | 0  | Low-quality    | Genome-fragment | 2.86 | 0 |
| S1_k141_131115                              | 1246  | No | NA | 0 | 0  | Low-quality    | Genome-fragment | 1.01 | 0 |
| S11_k141_178902                             | 3006  | No | NA | 0 | 2  | Not-determined | Genome-fragment | NA   | 0 |
| S3-final-viral-combined_k141_99415]]H2gene  | 1246  | No | NA | 1 | 0  | Low-quality    | Genome-fragment | 2.52 | 0 |
| S11_k141_178908                             | 1006  | No | NA | 0 | 0  | Not-determined | Genome-fragment | NA   | 0 |
| S1_k141_127769                              | 1246  | No | NA | 0 | 1  | Low-quality    | Genome-fragment | 0.62 | 0 |
| S11_k141_234077                             | 2675  | No | NA | 0 | 1  | Not-determined | Genome-fragment | NA   | 0 |
| S11_k141_41317                              | 1232  | No | NA | 0 | 1  | Not-determined | Genome-fragment | NA   | 0 |
| S11_k141_136549                             | 1032  | No | NA | 0 | 1  | Not-determined | Genome-fragment | NA   | 0 |
| S11_k141_318624                             | 3795  | No | NA | 0 | 5  | Not-determined | Genome-fragment | NA   | 0 |
| S11_k141_316247                             | 1046  | No | NA | 0 | 1  | Not-determined | Genome-fragment | NA   | 0 |
| S5-final-viral-combined_k141_4633]]full     | 1246  | No | NA | 3 | 0  | Low-quality    | Genome-fragment | 3.11 | 0 |
| S12-final-viral-combined_k141_351680]]full  | 1246  | No | NA | 0 | 0  | Low-quality    | Genome-fragment | 0.57 | 0 |
| S11_k141_13630                              | 1089  | No | NA | 0 | 0  | Not-determined | Genome-fragment | NA   | 0 |
| S12-final-viral-combined_k141_303671]]full  | 1246  | No | NA | 0 | 0  | Low-quality    | Genome-fragment | 2.72 | 0 |
| S8-final-viral-combined_k141_68815]]full    | 1246  | No | NA | 1 | 0  | Low-quality    | Genome-fragment | 2.18 | 0 |
| S11_k141_165277                             | 1482  | No | NA | 0 | 2  | Not-determined | Genome-fragment | NA   | 0 |
| S9-final-viral-combined_k141_35256]]full    | 1247  | No | NA | 0 | 1  | Low-quality    | Genome-fragment | 1.69 | 0 |
| S11-final-viral-combined_k141_250804]]full  | 1247  | No | NA | 0 | 0  | Low-quality    | Gen             |      |   |



|                                      |       |    |    |    |   |                |                 |       |   |
|--------------------------------------|-------|----|----|----|---|----------------|-----------------|-------|---|
| S11_k141_137136                      | 8446  | No | NA | 0  | 4 | Not-determined | Genome-fragment | NA    | 0 |
| S11_k141_121243                      | 1219  | No | NA | 0  | 0 | Not-determined | Genome-fragment | NA    | 0 |
| S5-final-viral-combined_k141_136927  | 1247  | No | NA | 0  | 1 | Low-quality    | Genome-fragment | 1.5   | 0 |
| S5-final-viral-combined_k141_67965   | 1247  | No | NA | 1  | 0 | Low-quality    | Genome-fragment | 2.33  | 0 |
| S11_k141_316632                      | 3745  | No | NA | 0  | 3 | Not-determined | Genome-fragment | NA    | 0 |
| S11_k141_328990                      | 1019  | No | NA | 0  | 0 | Not-determined | Genome-fragment | NA    | 0 |
| S11_k141_192429                      | 1355  | No | NA | 0  | 2 | Not-determined | Genome-fragment | NA    | 0 |
| S11_k141_68900                       | 1105  | No | NA | 0  | 0 | Not-determined | Genome-fragment | NA    | 0 |
| S11_k141_26494                       | 4478  | No | NA | 0  | 2 | Not-determined | Genome-fragment | NA    | 0 |
| S11_k141_137281                      | 1273  | No | NA | 0  | 0 | Not-determined | Genome-fragment | NA    | 0 |
| S11_k141_302950                      | 1000  | No | NA | 0  | 0 | Not-determined | Genome-fragment | NA    | 0 |
| S11_k141_220436                      | 2012  | No | NA | 0  | 1 | Not-determined | Genome-fragment | NA    | 0 |
| S5-final-viral-combined_k141_185175  | 1247  | No | NA | 0  | 2 | Low-quality    | Genome-fragment | 2.79  | 0 |
| S11_k141_137441                      | 1570  | No | NA | 0  | 0 | Not-determined | Genome-fragment | NA    | 0 |
| S11_k141_275463                      | 1521  | No | NA | 0  | 2 | Not-determined | Genome-fragment | NA    | 0 |
| S11_k141_316875                      | 1189  | No | NA | 0  | 1 | Not-determined | Genome-fragment | NA    | 0 |
| S7-final-viral-combined_k141_236659  | 1247  | No | NA | 2  | 0 | Low-quality    | Genome-fragment | 2.51  | 0 |
| S7-final-viral-combined_k141_53597   | 1247  | No | NA | 0  | 0 | Low-quality    | Genome-fragment | 3.64  | 0 |
| S11_k141_26090                       | 5247  | No | NA | 0  | 2 | Not-determined | Genome-fragment | NA    | 0 |
| S7-final-viral-combined_k141_120003  | 1247  | No | NA | 2  | 0 | Low-quality    | Genome-fragment | 2.01  | 0 |
| S11_k141_275614                      | 2814  | No | NA | 0  | 0 | Not-determined | Genome-fragment | NA    | 0 |
| S17-final-viral-combined_k141_6034   | 1247  | No | NA | 0  | 0 | Low-quality    | Genome-fragment | 0.79  | 0 |
| S11_k141_124028                      | 1592  | No | NA | 0  | 2 | Not-determined | Genome-fragment | NA    | 0 |
| S11_k141_137801                      | 1195  | No | NA | 0  | 0 | Not-determined | Genome-fragment | NA    | 0 |
| S11_k141_27139                       | 1111  | No | NA | 0  | 1 | Not-determined | Genome-fragment | NA    | 0 |
| S11_k141_330074                      | 1008  | No | NA | 0  | 1 | Not-determined | Genome-fragment | NA    | 0 |
| S4-final-viral-combined_k141_121544  | 1247  | No | NA | 2  | 0 | Low-quality    | Genome-fragment | 1.9   | 0 |
| S11_k141_330477                      | 5123  | No | NA | 0  | 0 | Not-determined | Genome-fragment | NA    | 0 |
| S11_k141_330479                      | 36558 | No | NA | 8  | 0 | High-quality   | Genome-fragment | 100   | 0 |
| S11_k141_330484                      | 4823  | No | NA | 0  | 0 | Not-determined | Genome-fragment | NA    | 0 |
| S8-final-viral-combined_k141_79910   | 1247  | No | NA | 0  | 0 | Low-quality    | Genome-fragment | 1.91  | 0 |
| S11_k141_330585                      | 1029  | No | NA | 0  | 0 | Not-determined | Genome-fragment | NA    | 0 |
| S8-final-viral-combined_k141_241728  | 1247  | No | NA | 0  | 0 | Low-quality    | Genome-fragment | 0.81  | 0 |
| S1-final-viral-combined_k141_70298   | 2245  | No | NA | 0  | 0 | Not-determined | Genome-fragment | NA    | 0 |
| S1-final-viral-combined_k141_234053  | 41421 | No | NA | 23 | 0 | High-quality   | High-quality    | 96.35 | 0 |
| S1-final-viral-combined_k141_33978   | 1875  | No | NA | 0  | 0 | Not-determined | Genome-fragment | NA    | 0 |
| S8_k141_113905                       | 1247  | No | NA | 0  | 0 | Low-quality    | Genome-fragment | 2.79  | 0 |
| S1-final-viral-combined_k141_394572  | 4760  | No | NA | 0  | 0 | Not-determined | Genome-fragment | NA    | 0 |
| S1-final-viral-combined_k141_394571  | 46833 | No | NA | 15 | 1 | High-quality   | High-quality    | 100   | 0 |
| S1-final-viral-combined_k141_79427   | 1248  | No | NA | 2  | 0 | Low-quality    | Genome-fragment | 3.15  | 0 |
| S1-final-viral-combined_k141_394628  | 10807 | No | NA | 0  | 1 | Medium-quality | Genome-fragment | 73.96 | 0 |
| S11-final-viral-combined_k141_150599 | 1248  | No | NA | 0  | 0 | Low-quality    | Genome-fragment | 1.07  | 0 |
| S1-final-viral-combined_k141_180985  | 9945  | No | NA | 1  | 6 | Not-determined | Genome-fragment | NA    | 0 |
| S1-final-viral-combined_k141_206076  | 1248  | No | NA | 0  | 0 | Low-quality    | Genome-fragment | 2.57  | 0 |
| S1-final-viral-combined_k141_106935  | 1248  | No | NA | 0  | 0 | Low-quality    | Genome-fragment | 2.69  | 0 |
| S1-final-viral-combined_k141_164566  | 4017  | No | NA | 0  | 1 | Not-determined | Genome-fragment | NA    | 0 |
| S1-final-viral-combined_k141_279715  | 9462  | No | NA | 0  | 7 | Not-determined | Genome-fragment | NA    | 0 |
| S1-final-viral-combined_k141_131658  | 1645  | No | NA | 0  | 0 | Not-determined | Genome-fragment | NA    | 0 |
| S1-final-viral-combined_k141_49387   | 3992  | No | NA | 0  | 1 | Not-determined | Genome-fragment | NA    | 0 |
| S1-final-viral-combined_k141_39306   | 1248  | No | NA | 0  | 0 | Low-quality    | Genome-fragment | 2.6   | 0 |
| S1-final-viral-combined_k141_345549  | 1238  | No | NA | 0  | 1 | Not-determined | Genome-fragment | NA    | 0 |
| S1-final-viral-combined_k141_361099  | 1012  | No | NA | 0  | 1 | Not-determined | Genome-fragment | NA    | 0 |
| S1-final-viral-combined_k141_179474  | 1248  | No | NA | 0  | 0 | Low-quality    | Genome-fragment | 0.92  | 0 |
| S1-final-viral-combined_k141_164566  | 2328  | No | NA | 0  | 1 | Not-determined | Genome-fragment | NA    | 0 |
| S1-final-viral-combined_k141_26274   | 1900  | No | NA | 0  | 0 | Not-determined | Genome-fragment | NA    | 0 |
| S1-final-viral-combined_k141_16472   | 3693  | No | NA | 0  | 2 | Not-determined | Genome-fragment | NA    | 0 |
| S1-final-viral-combined_k141_31527   | 1248  | No | NA | 0  | 0 | Low-quality    | Genome-fragment | 1.31  | 0 |
| S1-final-viral-combined_k141_29429   | 6245  | No | NA | 0  | 0 | Not-determined | Genome-fragment | NA    | 0 |
| S1-final-viral-combined_k141_12969   | 2815  | No | NA | 0  | 0 | Not-determined | Genome-fragment | NA    | 0 |
| S1-final-viral-combined_k141_148133  | 4223  | No | NA | 0  | 5 | Not-determined | Genome-fragment | NA    | 0 |
| S1-final-viral-combined_k141_8235    | 1223  | No | NA | 0  | 2 | Not-determined | Genome-fragment | NA    | 0 |
| S7-final-viral-combined_k141_220021  | 1248  | No | NA | 0  | 0 | Low-quality    | Genome-fragment | 2.08  | 0 |
| S7-final-viral-combined_k141_141731  | 1248  | No | NA | 1  | 0 | Low-quality    | Genome-fragment | 3.16  | 0 |
| S7-final-viral-combined_k141_204679  | 1248  | No | NA | 1  | 0 | Low-quality    | Genome-fragment | 2.08  | 0 |
| S7_k141_50452                        | 1248  | No | NA | 1  | 0 | Low-quality    | Genome-fragment | 3.44  | 0 |
| S2-final-viral-combined_k141_157508  | 1248  | No | NA | 0  | 0 | Low-quality    | Genome-fragment | 3.05  | 0 |
| S1-final-viral-combined_k141_345591  | 6096  | No | NA | 0  | 4 | Not-determined | Genome-fragment | NA    | 0 |
| S1-final-viral-combined_k141_100     | 1612  | No | NA | 0  | 3 | Not-determined | Genome-fragment | NA    | 0 |
| S1-final-viral-combined_k141_129131  | 1097  | No | NA | 0  | 0 | Not-determined | Genome-fragment | NA    | 0 |
| S1-final-viral-combined_k141_263299  | 1643  | No | NA | 0  | 2 | Not-determined | Genome-fragment | NA    | 0 |
| S1-final-viral-combined_k141_131740  | 1336  | No | NA | 0  | 1 | Not-determined | Genome-fragment | NA    | 0 |
| S2-final-viral-combined_k141_36410   | 1248  | No | NA | 0  | 1 | Low-quality    | Genome-fragment | 0.95  | 0 |
| S2_k141_137370                       | 1248  | No | NA | 1  | 0 | Low-quality    | Genome-fragment | 2.46  | 0 |
| S1-final-viral-combined_k141_123     | 4501  | No | NA | 0  | 0 | Not-determined | Genome-fragment | NA    | 0 |
| S4_k141_81545                        | 1248  | No | NA | 0  | 1 | Low-quality    | Genome-fragment | 0.42  | 0 |
| S4_k141_54047                        | 1248  | No | NA | 1  | 0 | Low-quality    | Genome-fragment | 0.7   | 0 |
| S1-final-viral-combined_k141_362058  | 2733  | No | NA | 0  | 1 | Not-determined | Genome-fragment | NA    | 0 |
| S1-final-viral-combined_k141_115273  | 1534  | No | NA | 0  | 1 | Not-determined | Genome-fragment | NA    | 0 |
| S1-final-viral-combined_k141_246845  | 1418  | No | NA | 0  | 2 | Not-determined | Genome-fragment | NA    | 0 |
| S1-final-viral-combined_k141_33039   | 1619  | No | NA | 0  | 1 | Not-determined | Genome-fragment | NA    | 0 |
| S11-final-viral-combined_k141_225856 | 1249  | No | NA | 2  | 0 | Low-quality    | Genome-fragment | 2.48  | 0 |
| S11-final-viral-combined_k141_142090 | 1249  | No | NA | 0  | 0 | Low-quality    | Genome-fragment | 2.49  | 0 |
| S1-final-viral-combined_k141_230440  | 4314  | No | NA | 0  | 2 | Not-determined | Genome-fragment | NA    | 0 |
| S1-final-viral-combined_k141_246847  | 8531  | No | NA | 0  | 0 | Not-determined | Genome-fragment | NA    | 0 |
| S1-final-viral-combined_k141_39539   | 1249  | No | NA | 0  | 0 | Low-quality    | Genome-fragment | 2.29  | 0 |
| S1_k141_178479                       | 1249  | No | NA | 0  | 0 | Low-quality    | Genome-fragment | 0.21  | 0 |
| S1-final-viral-combined_k141_115301  | 1168  | No | NA | 0  | 0 | Not-determined | Genome-fragment | NA    | 0 |
| S1-final-viral-combined_k141_115308  | 1495  | No | NA | 0  | 1 | Not-determined | Genome-fragment | NA    | 0 |
| S1-final-viral-combined_k141_213871  | 1446  | No | NA | 0  | 0 | Not-determined | Genome-fragment | NA    | 0 |
| S1-final-viral-combined_k141_164618  | 2006  | No | NA | 0  | 0 | Not-determined | Genome-fragment | NA    | 0 |
| S7-final-viral-combined_k141_236250  | 1249  | No | NA | 0  | 0 | Low-quality    | Genome-fragment | 1.56  | 0 |
| S12-final-viral-combined_k141_238556 | 1249  | No | NA | 0  | 1 | Low-quality    | Genome-fragment | 2.78  | 0 |
| S1-final-viral-combined_k141_345845  | 7264  | No | NA | 0  | 4 | Not-determined | Genome-fragment | NA    | 0 |
| S1-final-viral-combined_k141_345650  | 4889  | No | NA | 0  | 3 | Not-determined | Genome-fragment | NA    | 0 |
| S12_k141_331028                      | 1249  | No | NA | 0  | 0 | Low-quality    | Genome-fragment | 2.28  | 0 |
| S1-final-viral-combined_k141_164641  | 1522  | No | NA | 0  | 2 | Not-determined | Genome-fragment | NA    | 0 |
| S1-final-viral-combined_k141_49525   | 6238  | No | NA | 0  | 3 | Not-determined | Genome-fragment | NA    | 0 |
| S2-final-viral-combined_k141_115597  | 1249  | No | NA | 2  | 0 | Low-quality    | Genome-fragment | 2.73  | 0 |
| S8-final-viral-combined_k141_232167  | 1249  | No | NA | 0  | 1 | Low-quality    | Genome-fragment | 1.98  | 0 |
| S8-final-viral-combined_k141_186988  | 1249  | No | NA | 2  | 0 | Low-quality    | Genome-fragment | 24.05 | 0 |
| S1-final-viral-combined_k141_279838  | 1865  | No | NA | 0  | 0 | Not-determined | Genome-fragment | NA    | 0 |
| S1-final-viral-combined_k141_276111  | 2788  | No | NA | 0  | 1 | Not-determined | Genome-fragment | NA    | 0 |
| S1-final-viral-combined_k141_312828  | 4702  | No | NA | 0  | 1 | Not-determined | Genome-fragment | NA    | 0 |
| S8_k141_63002                        | 1249  | No | NA | 1  | 0 | Low-quality    | Genome-fragment | 3.65  | 0 |
| S1-final-viral-combined_k141_98846   | 2623  | No | NA | 0  | 2 | Not-determined | Genome-fragment | NA    | 0 |
| S1-final-viral-combined_k141_312847  | 4048  | No | NA | 0  | 2 | Not-determined | Genome-fragment | NA    | 0 |
| S9_k141_127222                       | 1250  | No | NA | 1  | 0 | Low-quality    | Genome-fragment | 3.02  | 0 |
| S1-final-viral-combined_k141_229213  | 1017  | No | NA | 0  | 0 | Not-determined | Genome-fragment | NA    | 0 |
| S1-final-viral-combined_k141_131842  | 1897  | No | NA | 0  | 0 | Not-determined | Genome-fragment | NA    | 0 |
| S1-final-viral-combined_k141_197551  | 1738  | No | NA | 0  | 1 | Not-determined | Genome-fragment | NA    | 0 |
| S1-final-viral-combined_k141_246518  | 1139  | No | NA | 0  | 0 | Not-determined | Genome-fragment | NA    | 0 |
| S1-final-viral-combined_k141_16599   | 6002  | No | NA | 0  | 2 | Not-determined | Genome-fragment | NA    | 0 |
| S1-final-viral-combined_k141_230510  | 1180  | No | NA | 0  | 1 | Not-determined | Genome-fragment | NA    | 0 |
| S1-final-viral-combined_k141_131856  | 1634  | No | NA | 0  | 2 | Not-determined | Genome-fragment | NA    | 0 |
| S11-final-viral-combined_k141_299497 | 1250  | No | NA | 0  | 1 | Low-quality    | Genome-fragment | 1.85  | 0 |
| S11-final-viral-combined_k141_163914 | 1250  | No | NA | 0  | 2 | Low-quality    | Genome-fragment | 2.35  | 0 |
| S1-final-viral-combined_k141_197561  | 2858  | No | NA | 0  | 0 | Not-determined | Genome-fragment | NA    | 0 |
| S1-final-viral-combined_k141_65855   | 5397  | No | NA | 0  | 2 | Not-determined | Genome-fragment | NA    | 0 |
| S11-final-viral-combined_k141_232882 | 1250  | No | NA | 2  | 0 | Low-quality    | Genome-fragment | 2.92  | 0 |
| S1-final-viral-combined_k141_312862  | 1523  | No | NA | 0  | 2 | Not-determined | Genome-fragment | NA    | 0 |
| S1-final-viral-combined_k141_362174  | 4671  | No | NA | 0  | 2 | Not-determined | Genome-fragment | NA    | 0 |
| S1-final-viral-combined_k141_65862   | 2109  | No | NA | 0  | 2 | Not-determined | Genome-fragment | NA    | 0 |
| S1-final-viral-combined_k141_16621   | 2421  | No | NA | 0  | 2 | Not-determined | Genome-fragment | NA    | 0 |
| S1-final-viral-combined_k141_246523  | 30540 | No | NA | 9  | 0 | Medium-quality | Genome-fragment | 58.68 | 0 |
| S1-final-viral-combined_k141_164693  | 31466 | No | NA | 0  | 7 | Not-determined | Genome-fragment | NA    | 0 |
| S1-final-viral-combined_k141_362181  | 1359  | No | NA | 0  | 1 | Not-determined | Genome-fragment | NA    | 0 |
| S1-final-viral-combined_k141_296349  | 1975  | No | NA | 0  | 2 | Not-determined | Genome-fragment | NA    | 0 |
| S1-final-viral-combined_k141_104145  | 1250  | No | NA | 0  | 1 | Low-quality    | Genome-fragment | 3.76  | 0 |
| S1-final-viral-combined_k141_6228    | 1250  | No | NA | 4  | 0 | Low-quality    | Genome-fragment | 2.84  | 0 |
| S1-final-viral-combined_k141_131904  | 1036  | No | NA | 0  | 0 | Not-determined | Genome-fragment | NA    | 0 |
| S1-final-viral-combined_k141_205779  | 1250  | No | NA | 2  | 0 | Low-quality    | Genome-fragment | 0.92  | 0 |
| S1_k141_133070                       | 1250  | No | NA | 0  | 0 | Low-quality    | Genome-fragment | 2.59  | 0 |
| S3-final-viral-combined_k141_58480   | 1250  | No | NA | 0  | 0 | Low-quality    | Genome-fragment | 2.46  | 0 |
| S1-final-viral-combined_k141_197622  | 3109  | No | NA | 0  | 2 | Not-determined | Genome-fragment | NA    | 0 |
| S3-final-viral-combined_k141_36652   | 1250  | No | NA | 2  | 0 | Low-quality    | Genome-fragment | 2.76  | 0 |
| S5-final-viral-combined_k141_157670  | 1250  | No | NA | 1  | 0 | Low-quality    | Genome-fragment | 1.97  | 0 |
| S1-final-viral-combined_k141_296379  | 3834  | No | NA | 0  | 2 | Not-determined | Genome-fragment | NA    | 0 |
| S1-final-viral-combined_k141_263400  | 1731  | No | NA | 0  | 0 | Not-determined | Genome-fragment | NA    | 0 |
| S7-final-viral-combined_k141_185228  | 1250  | No | NA | 0  | 0 | Low-quality    | Genome-fragment | 3     | 0 |
| S1-final-viral-combined_k141_279969  | 1850  | No | NA | 0  | 0 | Not-determined | Genome-fragment | NA    | 0 |



|                                      |          |       |    |    |    |    |                |                 |    |       |   |
|--------------------------------------|----------|-------|----|----|----|----|----------------|-----------------|----|-------|---|
| S1-final-viral-combined_k141_181306  | [full]   | 1755  | No | NA | 0  | 2  | Not-determined | Genome-fragment | NA | 2.58  | 0 |
| S2-final-viral-combined_k141_172081  | [full]   | 1251  | No | NA | 0  | 0  | Low-quality    | Genome-fragment | NA | 3.26  | 0 |
| S4-final-viral-combined_k141_9637    | [full]   | 1392  | No | NA | 0  | 0  | Not-determined | Genome-fragment | NA | 0     | 0 |
| S1-final-viral-combined_k141_296563  | [full]   | 1251  | No | NA | 0  | 0  | Low-quality    | Genome-fragment | NA | 2.38  | 0 |
| S8-final-viral-combined_k141_40783   | [full]   | 1251  | No | NA | 0  | 0  | Low-quality    | Genome-fragment | NA | 0.9   | 0 |
| S8_k141_1932                         |          | 1251  | No | NA | 0  | 0  | Low-quality    | Genome-fragment | NA | 2.11  | 0 |
| S1-final-viral-combined_k141_569     | [full]   | 3426  | No | NA | 0  | 2  | Not-determined | Genome-fragment | NA | 0     | 0 |
| S1-final-viral-combined_k141_362379  | [full]   | 5941  | No | NA | 0  | 4  | Not-determined | Genome-fragment | NA | 0.55  | 0 |
| S9-final-viral-combined_k141_14472   | [full]   | 1252  | No | NA | 0  | 1  | Low-quality    | Genome-fragment | NA | 1.51  | 0 |
| S9_k141_8396                         |          | 1252  | No | NA | 0  | 0  | Low-quality    | Genome-fragment | NA | 0     | 0 |
| S1-final-viral-combined_k141_31304   | [full]   | 2141  | No | NA | 0  | 3  | Not-determined | Genome-fragment | NA | 0     | 0 |
| S1-final-viral-combined_k141_362385  | [full]   | 4873  | No | NA | 0  | 3  | Not-determined | Genome-fragment | NA | 2.41  | 0 |
| S11-final-viral-combined_k141_3767   | [H2gene] | 1252  | No | NA | 0  | 0  | Low-quality    | Genome-fragment | NA | 2.83  | 0 |
| S1_k141_341663                       |          | 1252  | No | NA | 0  | 0  | Low-quality    | Genome-fragment | NA | 2.02  | 0 |
| S1-final-viral-combined_k141_203662  | [full]   | 29679 | No | NA | 4  | 0  | Medium-quality | Genome-fragment | NA | 64.61 | 0 |
| S1-final-viral-combined_k141_115572  | [full]   | 1874  | No | NA | 0  | 1  | Not-determined | Genome-fragment | NA | 0     | 0 |
| S1-final-viral-combined_k141_33145   | [full]   | 4351  | No | NA | 0  | 2  | Not-determined | Genome-fragment | NA | 0     | 0 |
| S1-final-viral-combined_k141_49700   | [full]   | 2506  | No | NA | 0  | 0  | Not-determined | Genome-fragment | NA | 0     | 0 |
| S1-final-viral-combined_k141_362395  | [full]   | 1255  | No | NA | 0  | 3  | Not-determined | Genome-fragment | NA | 0     | 0 |
| S1-final-viral-combined_k141_230822  | [full]   | 3064  | No | NA | 0  | 1  | Not-determined | Genome-fragment | NA | 0     | 0 |
| S1-final-viral-combined_k141_132120  | [full]   | 1370  | No | NA | 0  | 2  | Not-determined | Genome-fragment | NA | 0     | 0 |
| S1-final-viral-combined_k141_197846  | [full]   | 1026  | No | NA | 0  | 2  | Not-determined | Genome-fragment | NA | 0     | 0 |
| S1-final-viral-combined_k141_99095   | [full]   | 1314  | No | NA | 0  | 2  | Not-determined | Genome-fragment | NA | 0     | 0 |
| S1-final-viral-combined_k141_164894  | [full]   | 28496 | No | NA | 21 | 0  | Medium-quality | Genome-fragment | NA | 85.65 | 0 |
| S1-final-viral-combined_k141_280357  | [full]   | 2889  | No | NA | 0  | 1  | Not-determined | Genome-fragment | NA | 0     | 0 |
| S1-final-viral-combined_k141_280172  | [full]   | 3616  | No | NA | 0  | 1  | Not-determined | Genome-fragment | NA | 0     | 0 |
| S7-final-viral-combined_k141_22946   | [full]   | 1252  | No | NA | 1  | 0  | Low-quality    | Genome-fragment | NA | 5.94  | 0 |
| S17-final-viral-combined_k141_55103  | [full]   | 1252  | No | NA | 0  | 1  | Low-quality    | Genome-fragment | NA | 2.17  | 0 |
| S1-final-viral-combined_k141_31184   | [full]   | 1076  | No | NA | 0  | 1  | Not-determined | Genome-fragment | NA | 0     | 0 |
| S12-final-viral-combined_k141_15670  | [full]   | 1252  | No | NA | 1  | 0  | Low-quality    | Genome-fragment | NA | 1.72  | 0 |
| S12-final-viral-combined_k141_332767 | [H2gene] | 1252  | No | NA | 1  | 0  | Low-quality    | Genome-fragment | NA | 2.64  | 0 |
| S12_k141_76718                       |          | 1252  | No | NA | 0  | 0  | Low-quality    | Genome-fragment | NA | 2.41  | 0 |
| S12_k141_365527                      |          | 1252  | No | NA | 0  | 0  | Low-quality    | Genome-fragment | NA | 2.31  | 0 |
| S1-final-viral-combined_k141_263600  | [full]   | 1973  | No | NA | 0  | 1  | Not-determined | Genome-fragment | NA | 0     | 0 |
| S1-final-viral-combined_k141_36039   | [full]   | 1917  | No | NA | 0  | 1  | Not-determined | Genome-fragment | NA | 0     | 0 |
| S2-final-viral-combined_k141_29076   | [full]   | 1252  | No | NA | 0  | 0  | Low-quality    | Genome-fragment | NA | 2     | 0 |
| S1-final-viral-combined_k141_132134  | [full]   | 9922  | No | NA | 0  | 9  | Not-determined | Genome-fragment | NA | 0     | 0 |
| S1-final-viral-combined_k141_31919   | [full]   | 1519  | No | NA | 0  | 1  | Not-determined | Genome-fragment | NA | 0     | 0 |
| S1-final-viral-combined_k141_181436  | [full]   | 1352  | No | NA | 0  | 1  | Not-determined | Genome-fragment | NA | 0     | 0 |
| S1-final-viral-combined_k141_49766   | [full]   | 1294  | No | NA | 0  | 0  | Not-determined | Genome-fragment | NA | 0     | 0 |
| S8-final-viral-combined_k141_241935  | [full]   | 1252  | No | NA | 0  | 0  | Low-quality    | Genome-fragment | NA | 2.75  | 0 |
| S1-final-viral-combined_k141_239457  | [full]   | 1792  | No | NA | 0  | 0  | Not-determined | Genome-fragment | NA | 0.47  | 0 |
| S1-final-viral-combined_k141_280210  | [full]   | 1105  | No | NA | 0  | 1  | Not-determined | Genome-fragment | NA | 0     | 0 |
| S1-final-viral-combined_k141_181457  | [full]   | 1798  | No | NA | 0  | 1  | Not-determined | Genome-fragment | NA | 0     | 0 |
| S1-final-viral-combined_k141_280217  | [full]   | 1290  | No | NA | 0  | 0  | Not-determined | Genome-fragment | NA | 0     | 0 |
| S1-final-viral-combined_k141_230849  | [full]   | 1348  | No | NA | 0  | 0  | Not-determined | Genome-fragment | NA | 0     | 0 |
| S1-final-viral-combined_k141_230856  | [full]   | 1528  | No | NA | 0  | 1  | Not-determined | Genome-fragment | NA | 0     | 0 |
| S1-final-viral-combined_k141_115656  | [full]   | 2196  | No | NA | 0  | 1  | Not-determined | Genome-fragment | NA | 0     | 0 |
| S11_k141_153261                      |          | 1253  | No | NA | 0  | 0  | Low-quality    | Genome-fragment | NA | 2.08  | 0 |
| S1-final-viral-combined_k141_296624  | [full]   | 1938  | No | NA | 0  | 1  | Not-determined | Genome-fragment | NA | 0     | 0 |
| S1_k141_83431                        |          | 1253  | No | NA | 0  | 1  | Low-quality    | Genome-fragment | NA | 0.22  | 0 |
| S1-final-viral-combined_k141_313129  | [full]   | 2009  | No | NA | 0  | 0  | Not-determined | Genome-fragment | NA | 0     | 0 |
| S1-final-viral-combined_k141_378876  | [full]   | 2433  | No | NA | 0  | 2  | Not-determined | Genome-fragment | NA | 0     | 0 |
| S1-final-viral-combined_k141_378882  | [full]   | 1069  | No | NA | 0  | 0  | Not-determined | Genome-fragment | NA | 0     | 0 |
| S1-final-viral-combined_k141_148488  | [full]   | 14727 | No | NA | 0  | 11 | Not-determined | Genome-fragment | NA | 0     | 0 |
| S1-final-viral-combined_k141_230972  | [full]   | 1519  | No | NA | 0  | 2  | Not-determined | Genome-fragment | NA | 0     | 0 |
| S2_k141_185164                       |          | 1253  | No | NA | 0  | 1  | Low-quality    | Genome-fragment | NA | 1.08  | 0 |
| S1-final-viral-combined_k141_39304   | [full]   | 8186  | No | NA | 0  | 5  | Not-determined | Genome-fragment | NA | 0     | 0 |
| S1-final-viral-combined_k141_115697  | [full]   | 4304  | No | NA | 0  | 1  | Not-determined | Genome-fragment | NA | 0     | 0 |
| S1-final-viral-combined_k141_16922   | [full]   | 1604  | No | NA | 0  | 0  | Not-determined | Genome-fragment | NA | 0     | 0 |
| S1-final-viral-combined_k141_132190  | [full]   | 2521  | No | NA | 0  | 0  | Not-determined | Genome-fragment | NA | 0     | 0 |
| S4-final-viral-combined_k141_40084   | [full]   | 1253  | No | NA | 0  | 0  | Low-quality    | Genome-fragment | NA | 0.78  | 0 |
| S1-final-viral-combined_k141_115702  | [full]   | 8565  | No | NA | 0  | 6  | Not-determined | Genome-fragment | NA | 0     | 0 |
| S1-final-viral-combined_k141_329493  | [full]   | 3415  | No | NA | 0  | 1  | Not-determined | Genome-fragment | NA | 0     | 0 |
| S1-final-viral-combined_k141_82836   | [full]   | 3954  | No | NA | 0  | 4  | Not-determined | Genome-fragment | NA | 3.54  | 0 |
| S1-final-viral-combined_k141_99231   | [full]   | 1200  | No | NA | 0  | 1  | Not-determined | Genome-fragment | NA | 0     | 0 |
| S1-final-viral-combined_k141_132226  | [full]   | 1685  | No | NA | 0  | 2  | Not-determined | Genome-fragment | NA | 0     | 0 |
| S1-final-viral-combined_k141_36078   | [full]   | 7206  | No | NA | 0  | 4  | Not-determined | Genome-fragment | NA | 0     | 0 |
| S1-final-viral-combined_k141_296707  | [full]   | 1491  | No | NA | 0  | 0  | Not-determined | Genome-fragment | NA | 0     | 0 |
| S8-final-viral-combined_k141_94913   | [full]   | 1253  | No | NA | 0  | 0  | Low-quality    | Genome-fragment | NA | 3     | 0 |
| S1-final-viral-combined_k141_181565  | [full]   | 1189  | No | NA | 0  | 1  | Not-determined | Genome-fragment | NA | 2.76  | 0 |
| S11-final-viral-combined_k141_367883 | [full]   | 1254  | No | NA | 0  | 0  | Low-quality    | Genome-fragment | NA | 3.8   | 0 |
| S1_k141_213612                       |          | 1254  | No | NA | 0  | 0  | Low-quality    | Genome-fragment | NA | 0.4   | 0 |
| S1_k141_148001                       |          | 1254  | No | NA | 0  | 1  | Low-quality    | Genome-fragment | NA | 0.95  | 0 |
| S17-final-viral-combined_k141_37822  | [H2gene] | 1254  | No | NA | 0  | 2  | Low-quality    | Genome-fragment | NA | 1.72  | 0 |
| S12-final-viral-combined_k141_3232   | [full]   | 1254  | No | NA | 0  | 0  | Not-determined | Genome-fragment | NA | 2.69  | 0 |
| S1-final-viral-combined_k141_66136   | [full]   | 1579  | No | NA | 0  | 0  | Low-quality    | Genome-fragment | NA | 0     | 0 |
| S2-final-viral-combined_k141_99030   | [full]   | 1254  | No | NA | 0  | 0  | Not-determined | Genome-fragment | NA | 0     | 0 |
| S1-final-viral-combined_k141_296744  | [full]   | 1077  | No | NA | 0  | 0  | Not-determined | Genome-fragment | NA | 0     | 0 |
| S1-final-viral-combined_k141_66159   | [full]   | 1712  | No | NA | 0  | 0  | Not-determined | Genome-fragment | NA | 0     | 0 |
| S1-final-viral-combined_k141_181626  | [full]   | 4731  | No | NA | 0  | 3  | Not-determined | Genome-fragment | NA | 2.1   | 0 |
| S1-final-viral-combined_k141_146045  | [full]   | 7612  | No | NA | 0  | 7  | Not-determined | Genome-fragment | NA | 0     | 0 |
| S1-final-viral-combined_k141_115820  | [full]   | 1216  | No | NA | 0  | 0  | Not-determined | Genome-fragment | NA | 0     | 0 |
| S1-final-viral-combined_k141_66176   | [full]   | 8491  | No | NA | 0  | 2  | Not-determined | Genome-fragment | NA | 0     | 0 |
| S1-final-viral-combined_k141_29677   | [full]   | 1489  | No | NA | 0  | 0  | Not-determined | Genome-fragment | NA | 0     | 0 |
| S1-final-viral-combined_k141_132334  | [full]   | 3908  | No | NA | 0  | 1  | Not-determined | Genome-fragment | NA | 0     | 0 |
| S2-final-viral-combined_k141_184686  | [full]   | 1254  | No | NA | 1  | 0  | Low-quality    | Genome-fragment | NA | 0.83  | 0 |
| S1-final-viral-combined_k141_148617  | [full]   | 2261  | No | NA | 0  | 2  | Not-determined | Genome-fragment | NA | 2.45  | 0 |
| S6_k141_65521                        |          | 1254  | No | NA | 0  | 2  | Not-determined | Genome-fragment | NA | 1.96  | 0 |
| S1-final-viral-combined_k141_198030  | [full]   | 1150  | No | NA | 0  | 0  | Low-quality    | Genome-fragment | NA | 3.54  | 0 |
| S8-final-viral-combined_k141_9549    | [H2gene] | 1254  | No | NA | 2  | 0  | Low-quality    | Genome-fragment | NA | 2.63  | 0 |
| S9_k141_125496                       |          | 1255  | No | NA | 0  | 0  | Low-quality    | Genome-fragment | NA | 1.96  | 0 |
| S11-final-viral-combined_k141_111032 | [full]   | 1255  | No | NA | 1  | 0  | Low-quality    | Genome-fragment | NA | 2.63  | 0 |
| S1-final-viral-combined_k141_115877  | [full]   | 1096  | No | NA | 0  | 2  | Not-determined | Genome-fragment | NA | 0     | 0 |
| S1-final-viral-combined_k141_23989   | [full]   | 1845  | No | NA | 0  | 1  | Not-determined | Genome-fragment | NA | 0     | 0 |
| S1-final-viral-combined_k141_17057   | [full]   | 2661  | No | NA | 0  | 0  | Not-determined | Genome-fragment | NA | 0     | 0 |
| S11_k141_208527                      |          | 1255  | No | NA | 0  | 0  | Low-quality    | Genome-fragment | NA | 2.76  | 0 |
| S1-final-viral-combined_k141_198055  | [full]   | 2480  | No | NA | 0  | 3  | Not-determined | Genome-fragment | NA | 0     | 0 |
| S1-final-viral-combined_k141_17065   | [full]   | 1867  | No | NA | 0  | 0  | Not-determined | Genome-fragment | NA | 2.67  | 0 |
| S1_k141_271227                       |          | 1255  | No | NA | 1  | 0  | Low-quality    | Genome-fragment | NA | 2.28  | 0 |
| S3-final-viral-combined_k141_60057   | [full]   | 1255  | No | NA | 1  | 0  | Low-quality    | Genome-fragment | NA | 0.73  | 0 |
| S1-final-viral-combined_k141_263835  | [full]   | 610   | No | NA | 0  | 1  | Not-determined | Genome-fragment | NA | 2.82  | 0 |
| S5-final-viral-combined_k141_194600  | [H2gene] | 1255  | No | NA | 1  | 0  | Low-quality    | Genome-fragment | NA | 2.42  | 0 |
| S1-final-viral-combined_k141_150578  | [full]   | 1045  | No | NA | 0  | 2  | Not-determined | Genome-fragment | NA | 2.95  | 0 |
| S1-final-viral-combined_k141_247416  | [full]   | 1255  | No | NA | 0  | 0  | Low-quality    | Genome-fragment | NA | 2.08  | 0 |
| S2-final-viral-combined_k141_82342   | [H2gene] | 3573  | No | NA | 0  | 1  | Not-determined | Genome-fragment | NA | 2.38  | 0 |
| S4-final-viral-combined_k141_84338   | [full]   | 1255  | No | NA | 1  | 0  | Low-quality    | Genome-fragment | NA | 2.05  | 0 |
| S6-final-viral-combined_k141_132593  | [full]   | 1255  | No | NA | 0  | 0  | Low-quality    | Genome-fragment | NA | 2.08  | 0 |
| S8-final-viral-combined_k141_57595   | [full]   | 1255  | No | NA | 1  | 0  | Low-quality    | Genome-fragment | NA | 1.5   | 0 |
| S1-final-viral-combined_k141_115550  | [full]   | 3853  | No | NA | 0  | 0  | Not-determined | Genome-fragment | NA | 0.47  | 0 |
| S1-final-viral-combined_k141_165159  | [full]   | 4317  | No | NA | 0  | 1  | Not-determined | Genome-fragment | NA | 0     | 0 |
| S1-final-viral-combined_k141_162141  | [full]   | 1734  | No | NA | 0  | 2  | Not-determined | Genome-fragment | NA | 1.38  | 0 |
| S1-final-viral-combined_k141_137654  | [full]   | 1256  | No | NA | 0  | 0  | Low-quality    | Genome-fragment | NA | 3.45  | 0 |
| S1_k141_212297                       |          | 1256  | No | NA | 0  | 1  | Low-quality    | Genome-fragment | NA | 2.03  | 0 |
| S17-k141_24160                       |          | 1256  | No | NA | 0  | 2  | Low-quality    | Genome-fragment | NA | 1.95  | 0 |
| S12-final-viral-combined_k141_393318 | [full]   | 1256  | No | NA | 1  | 0  | Low-quality    | Genome-fragment | NA | 2.11  | 0 |
| S1-final-viral-combined_k141_346236  | [full]   | 7346  | No | NA | 1  | 5  | Not-determined | Genome-fragment | NA | 0     | 0 |
| S1-final-viral-combined_k141_329694  | [full]   | 1051  | No | NA | 0  | 0  | Not-determined | Genome-fragment | NA | 3.94  | 0 |
| S2-final-viral-combined_k141_92149   | [full]   | 1256  | No | NA | 0  | 0  | Low-quality    | Genome-fragment | NA | 1.94  | 0 |
| S1-final-viral-combined_k141_246243  | [full]   | 1951  | No | NA | 0  | 0  | Not-determined | Genome-fragment | NA | 3.45  | 0 |
| S4-final-viral-combined_k141_72759   | [full]   | 1256  | No | NA | 0  | 0  | Low-quality    | Genome-fragment | NA | 2.03  | 0 |
| S6-final-viral-combined_k141_133667  | [full]   | 1256  | No | NA | 1  | 0  | Low-quality    | Genome-fragment | NA | 1.95  | 0 |
| S9_k141_117264                       |          | 1257  | No | NA | 0  |    |                |                 |    |       |   |



|                                      |          |       |     |       |    |    |                |                 |       |      |
|--------------------------------------|----------|-------|-----|-------|----|----|----------------|-----------------|-------|------|
| S5-final-viral-combined_k141_129244  | [full]   | 1258  | No  | NA    | 1  | 0  | Low-quality    | Genome-fragment | 8.68  | 0    |
| S1-fnal-viral-combined_k141_11144    | [full]   | 5544  | No  | NA    | 1  | 0  | Not-determined | Genome-fragment | NA    | 0    |
| S12-final-viral-combined_k141_169520 | [full]   | 1258  | No  | NA    | 0  | 0  | Low-quality    | Genome-fragment | 3.44  | 0    |
| S1-fnal-viral-combined_k141_146507   | [full]   | 1520  | No  | NA    | 0  | 0  | Not-determined | Genome-fragment | NA    | 0    |
| S1-fnal-viral-combined_k141_379264   | [full]   | 1178  | No  | NA    | 0  | 0  | Not-determined | Genome-fragment | NA    | 0    |
| S12-final-viral-combined_k141_182199 | [full]   | 1258  | No  | NA    | 2  | 0  | Low-quality    | Genome-fragment | 2.79  | 0    |
| S2-final-viral-combined_k141_57188   | [full]   | 1258  | No  | NA    | 2  | 0  | Low-quality    | Genome-fragment | 2.92  | 0    |
| S2-final-viral-combined_k141_23812   | [full]   | 1258  | No  | NA    | 0  | 2  | Low-quality    | Genome-fragment | 2.85  | 0    |
| S4-final-viral-combined_k141_217164  | [full]   | 1258  | No  | NA    | 0  | 0  | Low-quality    | Genome-fragment | 0.79  | 0    |
| S1-fnal-viral-combined_k141_132662   | [full]   | 8323  | No  | NA    | 0  | 10 | Not-determined | Genome-fragment | NA    | 0    |
| S6-final-viral-combined_k141_136267  | [full]   | 1258  | No  | NA    | 1  | 0  | Low-quality    | Genome-fragment | 1.46  | 0    |
| S6-final-viral-combined_k141_379289  | [full]   | 1258  | No  | NA    | 0  | 0  | Low-quality    | Genome-fragment | 2.76  | 0    |
| S8-final-viral-combined_k141_218896  | [full]   | 1258  | No  | NA    | 1  | 1  | Low-quality    | Genome-fragment | 1.62  | 0    |
| S1-fnal-viral-combined_k141_231210   | [full]   | 1596  | No  | NA    | 0  | 0  | Not-determined | Genome-fragment | NA    | 0    |
| S1-fnal-viral-combined_k141_379289   | [full]   | 6739  | No  | NA    | 0  | 6  | Not-determined | Genome-fragment | NA    | 0    |
| S8-final-viral-combined_k141_126089  | [full]   | 1258  | No  | NA    | 0  | 1  | Low-quality    | Genome-fragment | 2.97  | 0    |
| S11-fnal-viral-combined_k141_314082  | [full]   | 1259  | No  | NA    | 0  | 0  | Low-quality    | Genome-fragment | 2.03  | 0    |
| S1-fnal-viral-combined_k141_147340   | [full]   | 1259  | No  | NA    | 0  | 0  | Low-quality    | Genome-fragment | 2.93  | 0    |
| S1-fnal-viral-combined_k141_362655   | [full]   | 1249  | No  | NA    | 0  | 0  | Not-determined | Genome-fragment | NA    | 0    |
| S1-fnal-viral-combined_k141_1173     | [full]   | 1774  | No  | NA    | 0  | 2  | Not-determined | Genome-fragment | NA    | 0    |
| S1-fnal-viral-combined_k141_329842   | [full]   | 2244  | No  | NA    | 0  | 1  | Not-determined | Genome-fragment | NA    | 0    |
| S1-fnal-viral-combined_k141_215037   | [full]   | 2623  | No  | NA    | 0  | 2  | Not-determined | Genome-fragment | NA    | 0    |
| S1-fnal-viral-combined_k141_171238   | [H2gene] | 1259  | No  | NA    | 2  | 0  | Low-quality    | Genome-fragment | 2.25  | 0    |
| S1-fnal-viral-combined_k141_66406    | [full]   | 7675  | No  | NA    | 0  | 8  | Not-determined | Genome-fragment | NA    | 0    |
| S1_k141_174759                       |          | 1259  | No  | NA    | 1  | 0  | Low-quality    | Genome-fragment | 3.57  | 0    |
| S1_k141_111915                       |          | 1259  | No  | NA    | 0  | 1  | Low-quality    | Genome-fragment | 0.47  | 0    |
| S5-final-viral-combined_k141_24518   | [full]   | 1259  | No  | NA    | 0  | 0  | Low-quality    | Genome-fragment | 0.78  | 0    |
| S1-fnal-viral-combined_k141_231234   | [full]   | 26780 | No  | NA    | 0  | 0  | Medium-quality | Genome-fragment | 65.27 | 0    |
| S17-k141_238843                      |          | 1259  | No  | NA    | 1  | 0  | Low-quality    | Genome-fragment | 2.67  | 0    |
| S1-fnal-viral-combined_k141_66458    | [full]   | 4385  | No  | NA    | 0  | 4  | Not-determined | Genome-fragment | NA    | 0    |
| S1-fnal-viral-combined_k141_66459    | [full]   | 3002  | No  | NA    | 0  | 1  | Not-determined | Genome-fragment | NA    | 0    |
| S1-fnal-viral-combined_k141_363007   | [full]   | 3711  | No  | NA    | 0  | 2  | Not-determined | Genome-fragment | NA    | 0    |
| S12-final-viral-combined_k141_318265 | [full]   | 1259  | No  | NA    | 1  | 0  | Low-quality    | Genome-fragment | 1.43  | 0    |
| S12_k141_186392                      |          | 1259  | No  | NA    | 0  | 1  | Low-quality    | Genome-fragment | 1.74  | 0    |
| S1-fnal-viral-combined_k141_198425   | [full]   | 1762  | No  | NA    | 0  | 1  | Not-determined | Genome-fragment | NA    | 0    |
| S1-fnal-viral-combined_k141_99599    | [full]   | 1235  | No  | NA    | 0  | 0  | Not-determined | Genome-fragment | NA    | 0    |
| S12_k141_198242                      |          | 1259  | No  | NA    | 0  | 0  | Low-quality    | Genome-fragment | 1.92  | 0    |
| S2-final-viral-combined_k141_55599   | [full]   | 1259  | No  | NA    | 0  | 0  | Low-quality    | Genome-fragment | 2.93  | 0    |
| S11-fnal-viral-combined_k141_20947   | [full]   | 1260  | No  | NA    | 0  | 0  | Low-quality    | Genome-fragment | 2.61  | 0    |
| S1-fnal-viral-combined_k141_66476    | [full]   | 2057  | No  | NA    | 0  | 0  | Not-determined | Genome-fragment | NA    | 0    |
| S1-fnal-viral-combined_k141_66480    | [full]   | 1278  | No  | NA    | 0  | 1  | Not-determined | Genome-fragment | NA    | 0    |
| S11-fnal-viral-combined_k141_25544   | [full]   | 1260  | No  | NA    | 0  | 0  | Low-quality    | Genome-fragment | 1.7   | 0    |
| S1-fnal-viral-combined_k141_33611    | [full]   | 1255  | No  | NA    | 0  | 0  | Not-determined | Genome-fragment | NA    | 0    |
| S1-fnal-viral-combined_k141_17366    | [full]   | 1716  | No  | NA    | 0  | 0  | Not-determined | Genome-fragment | NA    | 0    |
| S1-fnal-viral-combined_k141_246613   | [full]   | 2854  | No  | NA    | 0  | 2  | Not-determined | Genome-fragment | NA    | 0    |
| S1-fnal-viral-combined_k141_17380    | [full]   | 2636  | No  | NA    | 0  | 0  | Not-determined | Genome-fragment | NA    | 0    |
| S3-fnal-viral-combined_k141_8866     | [H2gene] | 1260  | No  | NA    | 2  | 0  | Low-quality    | Genome-fragment | 2.36  | 0    |
| S1-fnal-viral-combined_k141_33639    | [full]   | 1070  | No  | NA    | 0  | 0  | Not-determined | Genome-fragment | NA    | 0    |
| S1-fnal-viral-combined_k141_17397    | [full]   | 1952  | No  | NA    | 0  | 0  | Not-determined | Genome-fragment | NA    | 0    |
| S5-final-viral-combined_k141_34800   | [full]   | 1260  | No  | NA    | 0  | 0  | Low-quality    | Genome-fragment | 1.96  | 0    |
| S1-fnal-viral-combined_k141_1271     | [full]   | 2498  | No  | NA    | 0  | 0  | Not-determined | Genome-fragment | NA    | 0    |
| S5_k141_158512                       |          | 1260  | No  | NA    | 0  | 0  | Low-quality    | Genome-fragment | 2.43  | 0    |
| S7-final-viral-combined_k141_129716  | [full]   | 1260  | No  | NA    | 0  | 0  | Low-quality    | Genome-fragment | 1.68  | 0    |
| S1-fnal-viral-combined_k141_83362    | [full]   | 4290  | No  | NA    | 0  | 2  | Not-determined | Genome-fragment | NA    | 0    |
| S1-fnal-viral-combined_k141_165469   | [full]   | 2502  | No  | NA    | 0  | 0  | Not-determined | Genome-fragment | NA    | 0    |
| S1-fnal-viral-combined_k141_16454    | [full]   | 4517  | No  | NA    | 0  | 0  | Not-determined | Genome-fragment | NA    | 0    |
| S1-fnal-viral-combined_k141_49936    | [full]   | 3706  | No  | NA    | 0  | 3  | Not-determined | Genome-fragment | NA    | 0    |
| S1-fnal-viral-combined_k141_239891   | [full]   | 2841  | No  | NA    | 0  | 1  | Not-determined | Genome-fragment | NA    | 0    |
| S1-fnal-viral-combined_k141_280807   | [full]   | 9154  | No  | NA    | 0  | 0  | Not-determined | Genome-fragment | NA    | 0    |
| S17-fnal-viral-combined_k141_51532   | [full]   | 1260  | No  | NA    | 1  | 0  | Low-quality    | Genome-fragment | 2.59  | 0    |
| S1-fnal-viral-combined_k141_280811   | [full]   | 1108  | No  | NA    | 0  | 0  | Not-determined | Genome-fragment | NA    | 0    |
| S1-fnal-viral-combined_k141_346665   | [full]   | 6147  | No  | NA    | 0  | 1  | Not-determined | Genome-fragment | NA    | 0    |
| S2_k141_229975                       |          | 1260  | No  | NA    | 0  | 1  | Low-quality    | Genome-fragment | 2.1   | 0    |
| S1-fnal-viral-combined_k141_1318     | [full]   | 2439  | No  | NA    | 0  | 1  | Not-determined | Genome-fragment | NA    | 0    |
| S8-final-viral-combined_k141_92308   | [H2gene] | 1260  | No  | NA    | 0  | 0  | Low-quality    | Genome-fragment | 2.89  | 0    |
| S1-fnal-viral-combined_k141_231354   | [full]   | 3544  | No  | NA    | 0  | 0  | Not-determined | Genome-fragment | NA    | 0    |
| S1_k141_69059                        |          | 1261  | No  | NA    | 0  | 0  | Low-quality    | Genome-fragment | 0.12  | 0    |
| S1_k141_47123                        |          | 1261  | No  | NA    | 0  | 0  | Low-quality    | Genome-fragment | 3.34  | 0    |
| S1-fnal-viral-combined_k141_231366   | [full]   | 1847  | No  | NA    | 0  | 0  | Not-determined | Genome-fragment | NA    | 0    |
| S1-fnal-viral-combined_k141_1349     | [full]   | 2070  | No  | NA    | 0  | 1  | Not-determined | Genome-fragment | NA    | 0    |
| S1-fnal-viral-combined_k141_83405    | [full]   | 1705  | No  | NA    | 0  | 1  | Not-determined | Genome-fragment | NA    | 0    |
| S1-fnal-viral-combined_k141_264391   | [full]   | 27782 | No  | NA    | 0  | 3  | Not-determined | Genome-fragment | NA    | 0    |
| S5-final-viral-combined_k141_151518  | [full]   | 1261  | No  | NA    | 2  | 0  | Low-quality    | Genome-fragment | 3.11  | 0    |
| S1-fnal-viral-combined_k141_297288   | [full]   | 1838  | No  | NA    | 0  | 1  | Not-determined | Genome-fragment | NA    | 0    |
| S1-fnal-viral-combined_k141_19854    | [full]   | 6626  | No  | NA    | 0  | 3  | Not-determined | Genome-fragment | NA    | 0    |
| S1-fnal-viral-combined_k141_17449    | [full]   | 4689  | No  | NA    | 0  | 3  | Not-determined | Genome-fragment | NA    | 0    |
| S17-fnal-viral-combined_k141_38687   | [full]   | 1261  | No  | NA    | 0  | 2  | Low-quality    | Genome-fragment | 0.6   | 0    |
| S1-fnal-viral-combined_k141_280825   | [full]   | 4670  | No  | NA    | 0  | 4  | Not-determined | Genome-fragment | NA    | 0    |
| S17-fnal-viral-combined_k141_263398  | [full]   | 1261  | No  | NA    | 0  | 2  | Low-quality    | Genome-fragment | 0.62  | 0    |
| S17-k141_75484                       |          | 1261  | No  | NA    | 0  | 1  | Low-quality    | Genome-fragment | 1.12  | 0    |
| S1-fnal-viral-combined_k141_247921   | [full]   | 2429  | No  | NA    | 0  | 1  | Not-determined | Genome-fragment | NA    | 0    |
| S12-final-viral-combined_k141_99519  | [full]   | 1261  | No  | NA    | 0  | 0  | Low-quality    | Genome-fragment | 0.75  | 0    |
| S12-final-viral-combined_k141_142756 | [full]   | 1261  | No  | NA    | 0  | 0  | Low-quality    | Genome-fragment | 0.63  | 0    |
| S12_k141_75666                       |          | 1261  | No  | NA    | 0  | 1  | Low-quality    | Genome-fragment | 0.65  | 0    |
| S12_k141_11294                       |          | 1261  | No  | NA    | 0  | 0  | Low-quality    | Genome-fragment | 0.7   | 0    |
| S1-fnal-viral-combined_k141_1415     | [full]   | 2973  | No  | NA    | 0  | 1  | Not-determined | Genome-fragment | NA    | 0    |
| S1-fnal-viral-combined_k141_280879   | [full]   | 4978  | No  | NA    | 0  | 2  | Not-determined | Genome-fragment | NA    | 0    |
| S1-fnal-viral-combined_k141_23141    | [full]   | 12380 | No  | NA    | 1  | 0  | Medium-quality | Genome-fragment | 83.34 | 0    |
| S4-final-viral-combined_k141_8479    | [full]   | 1261  | No  | NA    | 0  | 0  | Low-quality    | Genome-fragment | 1.34  | 0    |
| S4-final-viral-combined_k141_9435    | [full]   | 1261  | No  | NA    | 0  | 0  | Low-quality    | Genome-fragment | 2.08  | 0    |
| S1-fnal-viral-combined_k141_198600   | [full]   | 6249  | No  | NA    | 0  | 1  | Not-determined | Genome-fragment | NA    | 0    |
| S1-fnal-viral-combined_k141_280887   | [full]   | 1568  | No  | NA    | 0  | 0  | Not-determined | Genome-fragment | NA    | 0    |
| S1-fnal-viral-combined_k141_99749    | [full]   | 1461  | No  | NA    | 0  | 2  | Not-determined | Genome-fragment | NA    | 0    |
| S1-fnal-viral-combined_k141_329394   | [full]   | 51171 | Yes | 43190 | 16 | 7  | Complete       | High-quality    | 100   | 15.6 |
| S1-fnal-viral-combined_k141_299739   | [full]   | 2867  | No  | NA    | 0  | 0  | Not-determined | Genome-fragment | NA    | 0    |
| S1-fnal-viral-combined_k141_66554    | [full]   | 2727  | No  | NA    | 0  | 2  | Not-determined | Genome-fragment | NA    | 0    |
| S1-fnal-viral-combined_k141_198626   | [full]   | 1157  | No  | NA    | 0  | 1  | Not-determined | Genome-fragment | NA    | 0    |
| S4-final-viral-combined_k141_7476    | [full]   | 1261  | No  | NA    | 0  | 1  | Low-quality    | Genome-fragment | 1.2   | 0    |
| S1-fnal-viral-combined_k141_248097   | [full]   | 1269  | No  | NA    | 0  | 0  | Not-determined | Genome-fragment | NA    | 0    |
| S1-fnal-viral-combined_k141_33813    | [full]   | 16823 | No  | NA    | 0  | 12 | Not-determined | Genome-fragment | NA    | 0    |
| S9-final-viral-combined_k141_105521  | [full]   | 1262  | No  | NA    | 0  | 0  | Low-quality    | Genome-fragment | 2.51  | 0    |
| S9-final-viral-combined_k141_92151   | [H2gene] | 1262  | No  | NA    | 0  | 0  | Low-quality    | Genome-fragment | 2.12  | 0    |
| S1-fnal-viral-combined_k141_329883   | [full]   | 4415  | No  | NA    | 0  | 4  | Not-determined | Genome-fragment | NA    | 0    |
| S7-final-viral-combined_k141_9721    | [full]   | 1262  | No  | NA    | 0  | 0  | Low-quality    | Genome-fragment | 2.13  | 0    |
| S1-fnal-viral-combined_k141_215371   | [full]   | 6484  | No  | NA    | 0  | 0  | Not-determined | Genome-fragment | NA    | 0    |
| S17-fnal-viral-combined_k141_102433  | [full]   | 1262  | No  | NA    | 1  | 0  | Low-quality    | Genome-fragment | 1.2   | 0    |
| S1-fnal-viral-combined_k141_182154   | [full]   | 1442  | No  | NA    | 0  | 1  | Not-determined | Genome-fragment | NA    | 0    |
| S1-fnal-viral-combined_k141_50047    | [full]   | 4504  | No  | NA    | 0  | 4  | Not-determined | Genome-fragment | NA    | 0    |
| S17-fnal-viral-combined_k141_248661  | [full]   | 1262  | No  | NA    | 0  | 0  | Low-quality    | Genome-fragment | 0.81  | 0    |
| S1-fnal-viral-combined_k141_215349   | [full]   | 8512  | No  | NA    | 0  | 5  | Not-determined | Genome-fragment | NA    | 0    |
| S12-final-viral-combined_k141_33809  | [full]   | 1262  | No  | NA    | 0  | 0  | Low-quality    | Genome-fragment | 2.36  | 0    |
| S12-final-viral-combined_k141_86548  | [H2gene] | 1262  | No  | NA    | 0  | 0  | Low-quality    | Genome-fragment | 3.02  | 0    |
| S2-final-viral-combined_k141_87233   | [full]   | 1262  | No  | NA    | 0  | 0  | Low-quality    | Genome-fragment | 2.44  | 0    |
| S2-final-viral-combined_k141_110072  | [full]   | 1262  | No  | NA    | 1  | 0  | Low-quality    | Genome-fragment | 2.85  | 0    |
| S1-fnal-viral-combined_k141_248087   | [full]   | 2419  | No  | NA    | 0  | 1  | Not-determined | Genome-fragment | NA    | 0    |
| S4_k141_142401                       |          | 1262  | No  | NA    | 2  | 0  | Low-quality    | Genome-fragment | 0.73  | 0    |
| S1-fnal-viral-combined_k141_182241   | [full]   | 1177  | No  | NA    | 0  | 1  | Not-determined | Genome-fragment | NA    | 0    |
| S1-fnal-viral-combined_k141_33908    | [full]   | 1454  | No  | NA    | 0  | 0  | Not-determined | Genome-fragment | NA    | 0    |
| S1-fnal-viral-combined_k141_313824   | [full]   | 4085  | No  | NA    | 0  | 4  | Not-determined | Genome-fragment | NA    | 0    |
| S6_k141_111742                       |          | 1262  | No  | NA    | 0  | 0  | Low-quality    | Genome-fragment | 1.32  | 0    |
| S1-fnal-viral-combined_k141_20102    | [full]   | 3269  | No  | NA    | 0  | 1  | Not-determined | Genome-fragment | NA    | 0    |
| S1-fnal-viral-combined_k141_165654   | [full]   | 2062  | No  | NA    | 0  | 0  | Not-determined | Genome-fragment | NA    | 0    |
| S1-fnal-viral-combined_k141_281018   | [full]   | 5269  | No  | NA    | 0  | 4  | Not-determined | Genome-fragment | NA    | 0    |
| S1-fnal-viral-combined_k141_346881   | [full]   | 2845  | No  | NA    | 0  | 0  | Not-determined | Genome-fragment | NA    | 0    |
| S9-final-viral-combined_k141_16039   | [full]   | 1263  | No  | NA    | 0  | 0  | Low-quality    | Genome-fragment | 1.77  | 0    |
| S1-fnal-viral-combined_k141_281033   | [full]   | 1082  | No  | NA    | 0  | 1  | Not-determined | Genome-fragment | NA    | 0    |
| S1-fnal-viral-combined_k141_165607   | [full]   | 2641  | No  | NA    | 0  | 0  | Not-determined | Genome-fragment | NA    | 0    |
| S1-fnal-viral-combined_k141_165608   | [full]   | 1401  | No  | NA    | 0  | 0  | Not-determined | Genome-fragment | NA    | 0    |
| S11-fnal-viral-combined_k141_187844  | [full]   | 1263  | No  | NA    | 1  | 0  | Low-quality    | Genome-fragment | 2.8   | 0    |
| S1-fnal-viral-combined_k141_116554   | [full]   | 17    |     |       |    |    |                |                 |       |      |



|                                      |          |       |    |    |   |    |                |                 |    |       |   |
|--------------------------------------|----------|-------|----|----|---|----|----------------|-----------------|----|-------|---|
| S1-final-viral-combined_k141_379598  | [full]   | 3489  | No | NA | 0 | 3  | Not-determined | Genome-fragment | NA | 0     | 0 |
| S1-final-viral-combined_k141_116691  | [full]   | 2948  | No | NA | 0 | 2  | Not-determined | Genome-fragment | NA | 0     | 0 |
| S5_k141_64805                        |          | 1264  | No | NA | 1 | 0  | Low-quality    | Genome-fragment | NA | 1.85  | 0 |
| S2-final-viral-combined_k141_6993    | [full]   | 1264  | No | NA | 0 | 0  | Low-quality    | Genome-fragment | NA | 2.2   | 0 |
| S1-final-viral-combined_k141_231572  | [full]   | 4555  | No | NA | 0 | 1  | Not-determined | Genome-fragment | NA | 0     | 0 |
| S2_k141_193774                       |          | 1264  | No | NA | 0 | 0  | Low-quality    | Genome-fragment | NA | 0.78  | 0 |
| S1-final-viral-combined_k141_314006  | [full]   | 1934  | No | NA | 0 | 2  | Not-determined | Genome-fragment | NA | 0     | 0 |
| S1-final-viral-combined_k141_17781   | [full]   | 2233  | No | NA | 0 | 1  | Not-determined | Genome-fragment | NA | 0     | 0 |
| S1-final-viral-combined_k141_145404  | [full]   | 5600  | No | NA | 0 | 4  | Not-determined | Genome-fragment | NA | 0     | 0 |
| S8-final-viral-combined_k141_49187   | [full]   | 1264  | No | NA | 0 | 0  | Low-quality    | Genome-fragment | NA | 2.71  | 0 |
| S9_k141_30026                        |          | 1265  | No | NA | 2 | 0  | Low-quality    | Genome-fragment | NA | 3.15  | 0 |
| S11-final-viral-combined_k141_375293 | [full]   | 1265  | No | NA | 2 | 0  | Low-quality    | Genome-fragment | NA | 1.1   | 0 |
| S1-final-viral-combined_k141_34176   | [full]   | 1578  | No | NA | 0 | 2  | Not-determined | Genome-fragment | NA | 0     | 0 |
| S1-final-viral-combined_k141_347139  | [full]   | 5145  | No | NA | 0 | 4  | Not-determined | Genome-fragment | NA | 0     | 0 |
| S1-final-viral-combined_k141_21789   | [full]   | 1265  | No | NA | 1 | 0  | Low-quality    | Genome-fragment | NA | 3.57  | 0 |
| S1-final-viral-combined_k141_50280   | [full]   | 7116  | No | NA | 0 | 3  | Not-determined | Genome-fragment | NA | 0     | 0 |
| S1-final-viral-combined_k141_330329  | [full]   | 33155 | No | NA | 7 | 4  | Medium-quality | Genome-fragment | NA | 77.41 | 0 |
| S1-final-viral-combined_k141_141459  | [full]   | 1265  | No | NA | 0 | 1  | Low-quality    | Genome-fragment | NA | 1.64  | 0 |
| S5-final-viral-combined_k141_178108  | [full]   | 1265  | No | NA | 0 | 0  | Low-quality    | Genome-fragment | NA | 1.42  | 0 |
| S1-final-viral-combined_k141_182446  | [full]   | 1108  | No | NA | 0 | 0  | Not-determined | Genome-fragment | NA | 0     | 0 |
| S1-final-viral-combined_k141_50297   | [full]   | 1910  | No | NA | 0 | 0  | Not-determined | Genome-fragment | NA | 0     | 0 |
| S1-final-viral-combined_k141_50304   | [full]   | 1883  | No | NA | 0 | 2  | Not-determined | Genome-fragment | NA | 0     | 0 |
| S7-final-viral-combined_k141_218510  | [full]   | 1265  | No | NA | 0 | 1  | Low-quality    | Genome-fragment | NA | 0.99  | 0 |
| S1-final-viral-combined_k141_50306   | [full]   | 2559  | No | NA | 0 | 0  | Not-determined | Genome-fragment | NA | 0     | 0 |
| S1-final-viral-combined_k141_215482  | [full]   | 3289  | No | NA | 0 | 2  | Not-determined | Genome-fragment | NA | 0     | 0 |
| S1-final-viral-combined_k141_133285  | [full]   | 1266  | No | NA | 0 | 1  | Not-determined | Genome-fragment | NA | 0     | 0 |
| S1-final-viral-combined_k141_149378  | [full]   | 2141  | No | NA | 0 | 2  | Not-determined | Genome-fragment | NA | 0     | 0 |
| S7-final-viral-combined_k141_180068  | [full]   | 1265  | No | NA | 0 | 1  | Low-quality    | Genome-fragment | NA | 2.75  | 0 |
| S7-final-viral-combined_k141_243108  | [full]   | 1265  | No | NA | 0 | 1  | Low-quality    | Genome-fragment | NA | 1.95  | 0 |
| S1-final-viral-combined_k141_297659  | [full]   | 13147 | No | NA | 0 | 7  | Not-determined | Genome-fragment | NA | 0     | 0 |
| S1-final-viral-combined_k141_215511  | [full]   | 3293  | No | NA | 0 | 2  | Not-determined | Genome-fragment | NA | 0     | 0 |
| S1-final-viral-combined_k141_342788  | [full]   | 1536  | No | NA | 0 | 2  | Not-determined | Genome-fragment | NA | 0     | 0 |
| S17-final-viral-combined_k141_189598 | [H2gene] | 1265  | No | NA | 1 | 0  | Low-quality    | Genome-fragment | NA | 1.19  | 0 |
| S1-final-viral-combined_k141_83726   | [full]   | 3759  | No | NA | 0 | 3  | Not-determined | Genome-fragment | NA | 0     | 0 |
| S12-final-viral-combined_k141_179970 | [full]   | 1265  | No | NA | 0 | 1  | Low-quality    | Genome-fragment | NA | 1.5   | 0 |
| S1-final-viral-combined_k141_149420  | [full]   | 3087  | No | NA | 0 | 2  | Not-determined | Genome-fragment | NA | 0     | 0 |
| S12-final-viral-combined_k141_32847  | [full]   | 1265  | No | NA | 1 | 0  | Low-quality    | Genome-fragment | NA | 2.04  | 0 |
| S12-final-viral-combined_k141_276138 | [H2gene] | 1265  | No | NA | 2 | 0  | Low-quality    | Genome-fragment | NA | 4.44  | 0 |
| S1-final-viral-combined_k141_215575  | [full]   | 2424  | No | NA | 0 | 1  | Not-determined | Genome-fragment | NA | 0     | 0 |
| S6-final-viral-combined_k141_35870   | [full]   | 1265  | No | NA | 0 | 0  | Low-quality    | Genome-fragment | NA | 0.9   | 0 |
| S9-final-viral-combined_k141_63495   | [full]   | 1266  | No | NA | 0 | 1  | Low-quality    | Genome-fragment | NA | 0.91  | 0 |
| S1-final-viral-combined_k141_248212  | [full]   | 3635  | No | NA | 0 | 2  | Not-determined | Genome-fragment | NA | 0     | 0 |
| S1-final-viral-combined_k141_83783   | [full]   | 4480  | No | NA | 0 | 0  | Not-determined | Genome-fragment | NA | 0     | 0 |
| S1-final-viral-combined_k141_165771  | [full]   | 2697  | No | NA | 0 | 0  | Not-determined | Genome-fragment | NA | 0     | 0 |
| S1-final-viral-combined_k141_50386   | [full]   | 1062  | No | NA | 0 | 0  | Not-determined | Genome-fragment | NA | 0     | 0 |
| S1-final-viral-combined_k141_231791  | [full]   | 3453  | No | NA | 0 | 2  | Not-determined | Genome-fragment | NA | 0     | 0 |
| S1-final-viral-combined_k141_297754  | [full]   | 2068  | No | NA | 0 | 0  | Not-determined | Genome-fragment | NA | 0     | 0 |
| S1-final-viral-combined_k141_231798  | [full]   | 6162  | No | NA | 0 | 5  | Not-determined | Genome-fragment | NA | 0     | 0 |
| S11-final-viral-combined_k141_96241  | [full]   | 1266  | No | NA | 0 | 1  | Low-quality    | Genome-fragment | NA | 1.08  | 0 |
| S1-final-viral-combined_k141_50405   | [full]   | 4526  | No | NA | 0 | 4  | Not-determined | Genome-fragment | NA | 0     | 0 |
| S1-final-viral-combined_k141_215650  | [full]   | 3054  | No | NA | 0 | 3  | Not-determined | Genome-fragment | NA | 0     | 0 |
| S7_k141_224000                       |          | 1266  | No | NA | 0 | 0  | Low-quality    | Genome-fragment | NA | 2.17  | 0 |
| S1-final-viral-combined_k141_248293  | [full]   | 1693  | No | NA | 0 | 2  | Not-determined | Genome-fragment | NA | 0     | 0 |
| S1-final-viral-combined_k141_149472  | [full]   | 23957 | No | NA | 0 | 12 | Not-determined | Genome-fragment | NA | 0     | 0 |
| S1-final-viral-combined_k141_281270  | [full]   | 3802  | No | NA | 0 | 3  | Not-determined | Genome-fragment | NA | 0     | 0 |
| S1-final-viral-combined_k141_314247  | [full]   | 1717  | No | NA | 0 | 0  | Not-determined | Genome-fragment | NA | 0     | 0 |
| S1-final-viral-combined_k141_248315  | [full]   | 3898  | No | NA | 0 | 2  | Not-determined | Genome-fragment | NA | 0     | 0 |
| S1-final-viral-combined_k141_330509  | [full]   | 3074  | No | NA | 0 | 1  | Not-determined | Genome-fragment | NA | 0     | 0 |
| S1-final-viral-combined_k141_149498  | [full]   | 1553  | No | NA | 0 | 0  | Not-determined | Genome-fragment | NA | 0     | 0 |
| S1-final-viral-combined_k141_330512  | [full]   | 1601  | No | NA | 0 | 1  | Not-determined | Genome-fragment | NA | 0     | 0 |
| S17-final-viral-combined_k141_258108 | [full]   | 1266  | No | NA | 0 | 0  | Low-quality    | Genome-fragment | NA | 0.79  | 0 |
| S1-final-viral-combined_k141_379591  | [full]   | 5614  | No | NA | 0 | 1  | Not-determined | Genome-fragment | NA | 0     | 0 |
| S17-final-viral-combined_k141_94140  | [full]   | 1266  | No | NA | 0 | 1  | Low-quality    | Genome-fragment | NA | 1.8   | 0 |
| S1-final-viral-combined_k141_149506  | [full]   | 4629  | No | NA | 0 | 3  | Not-determined | Genome-fragment | NA | 0     | 0 |
| S17-final-viral-combined_k141_62398  | [H2gene] | 1266  | No | NA | 0 | 0  | Low-quality    | Genome-fragment | NA | 2.74  | 0 |
| S1-final-viral-combined_k141_149508  | [full]   | 1199  | No | NA | 0 | 1  | Not-determined | Genome-fragment | NA | 0     | 0 |
| S1-final-viral-combined_k141_379595  | [full]   | 2161  | No | NA | 0 | 2  | Not-determined | Genome-fragment | NA | 0     | 0 |
| S1-final-viral-combined_k141_50436   | [full]   | 5139  | No | NA | 0 | 1  | Not-determined | Genome-fragment | NA | 0     | 0 |
| S1-final-viral-combined_k141_344291  | [full]   | 2810  | No | NA | 0 | 0  | Not-determined | Genome-fragment | NA | 0     | 0 |
| S1-final-viral-combined_k141_281425  | [full]   | 1255  | No | NA | 0 | 0  | Not-determined | Genome-fragment | NA | 0     | 0 |
| S1-final-viral-combined_k141_182634  | [full]   | 1867  | No | NA | 0 | 1  | Not-determined | Genome-fragment | NA | 0     | 0 |
| S1-final-viral-combined_k141_248392  | [full]   | 10209 | No | NA | 0 | 3  | Not-determined | Genome-fragment | NA | 0     | 0 |
| S1-final-viral-combined_k141_248394  | [full]   | 2444  | No | NA | 0 | 0  | Not-determined | Genome-fragment | NA | 0     | 0 |
| S12-final-viral-combined_k141_340915 | [full]   | 1266  | No | NA | 1 | 0  | Low-quality    | Genome-fragment | NA | 1.3   | 0 |
| S1-final-viral-combined_k141_20191   | [full]   | 2850  | No | NA | 0 | 0  | Not-determined | Genome-fragment | NA | 0     | 0 |
| S12-final-viral-combined_k141_359373 | [full]   | 1266  | No | NA | 3 | 0  | Low-quality    | Genome-fragment | NA | 2.72  | 0 |
| S1-final-viral-combined_k141_133538  | [full]   | 2158  | No | NA | 0 | 1  | Not-determined | Genome-fragment | NA | 0     | 0 |
| S1-final-viral-combined_k141_2030    | [full]   | 7214  | No | NA | 0 | 3  | Not-determined | Genome-fragment | NA | 0     | 0 |
| S1-final-viral-combined_k141_182476  | [full]   | 2046  | No | NA | 0 | 1  | Not-determined | Genome-fragment | NA | 0     | 0 |
| S1-final-viral-combined_k141_199239  | [full]   | 1356  | No | NA | 0 | 2  | Not-determined | Genome-fragment | NA | 0     | 0 |
| S1-final-viral-combined_k141_18089   | [full]   | 3427  | No | NA | 0 | 2  | Not-determined | Genome-fragment | NA | 0     | 0 |
| S1-final-viral-combined_k141_133561  | [full]   | 1398  | No | NA | 0 | 0  | Not-determined | Genome-fragment | NA | 0     | 0 |
| S1-final-viral-combined_k141_330606  | [full]   | 2498  | No | NA | 0 | 2  | Not-determined | Genome-fragment | NA | 0     | 0 |
| S1-final-viral-combined_k141_50483   | [full]   | 1952  | No | NA | 0 | 1  | Not-determined | Genome-fragment | NA | 0     | 0 |
| S1-final-viral-combined_k141_83958   | [full]   | 2606  | No | NA | 0 | 3  | Not-determined | Genome-fragment | NA | 0     | 0 |
| S1-final-viral-combined_k141_116855  | [full]   | 1907  | No | NA | 0 | 1  | Not-determined | Genome-fragment | NA | 0     | 0 |
| S1-final-viral-combined_k141_231924  | [full]   | 7654  | No | NA | 0 | 4  | Not-determined | Genome-fragment | NA | 0     | 0 |
| S1-final-viral-combined_k141_231927  | [full]   | 1181  | No | NA | 0 | 1  | Not-determined | Genome-fragment | NA | 0     | 0 |
| S2-final-viral-combined_k141_206751  | [full]   | 1266  | No | NA | 0 | 0  | Low-quality    | Genome-fragment | NA | 1.87  | 0 |
| S4-final-viral-combined_k141_119859  | [full]   | 1266  | No | NA | 2 | 0  | Low-quality    | Genome-fragment | NA | 2.86  | 0 |
| S1-final-viral-combined_k141_231935  | [full]   | 1137  | No | NA | 0 | 0  | Not-determined | Genome-fragment | NA | 0     | 0 |
| S1-final-viral-combined_k141_116870  | [full]   | 1422  | No | NA | 0 | 0  | Not-determined | Genome-fragment | NA | 0     | 0 |
| S1-final-viral-combined_k141_18104   | [full]   | 4658  | No | NA | 0 | 0  | Not-determined | Genome-fragment | NA | 0     | 0 |
| S1-final-viral-combined_k141_199388  | [full]   | 1580  | No | NA | 0 | 1  | Not-determined | Genome-fragment | NA | 0     | 0 |
| S1-final-viral-combined_k141_50508   | [full]   | 4230  | No | NA | 0 | 1  | Not-determined | Genome-fragment | NA | 0     | 0 |
| S1-final-viral-combined_k141_100196  | [full]   | 1288  | No | NA | 0 | 1  | Not-determined | Genome-fragment | NA | 0     | 0 |
| S1-final-viral-combined_k141_133606  | [full]   | 2147  | No | NA | 0 | 2  | Not-determined | Genome-fragment | NA | 0     | 0 |
| S1-final-viral-combined_k141_149656  | [full]   | 1023  | No | NA | 0 | 1  | Not-determined | Genome-fragment | NA | 0     | 0 |
| S4-final-viral-combined_k141_50746   | [full]   | 1266  | No | NA | 0 | 1  | Low-quality    | Genome-fragment | NA | 1.97  | 0 |
| S11-final-viral-combined_k141_295353 | [full]   | 1267  | No | NA | 1 | 0  | Low-quality    | Genome-fragment | NA | 2.61  | 0 |
| S1-final-viral-combined_k141_83666   | [full]   | 3581  | No | NA | 0 | 2  | Not-determined | Genome-fragment | NA | 0     | 0 |
| S1-final-viral-combined_k141_69484   | [full]   | 1267  | No | NA | 0 | 0  | Low-quality    | Genome-fragment | NA | 1.91  | 0 |
| S1-final-viral-combined_k141_1861    | [full]   | 1267  | No | NA | 2 | 0  | Low-quality    | Genome-fragment | NA | 3.37  | 0 |
| S1-final-viral-combined_k141_167084  | [full]   | 1267  | No | NA | 2 | 0  | Low-quality    | Genome-fragment | NA | 2.59  | 0 |
| S1-final-viral-combined_k141_373691  | [full]   | 1267  | No | NA | 0 | 0  | Low-quality    | Genome-fragment | NA | 2.68  | 0 |
| S1-final-viral-combined_k141_165809  | [full]   | 1287  | No | NA | 0 | 1  | Not-determined | Genome-fragment | NA | 0     | 0 |
| S1-final-viral-combined_k141_116927  | [full]   | 2484  | No | NA | 0 | 3  | Not-determined | Genome-fragment | NA | 0     | 0 |
| S1-final-viral-combined_k141_215796  | [full]   | 2222  | No | NA | 0 | 2  | Not-determined | Genome-fragment | NA | 0     | 0 |
| S1-final-viral-combined_k141_363893  | [full]   | 1100  | No | NA | 0 | 0  | Not-determined | Genome-fragment | NA | 0     | 0 |
| S1-final-viral-combined_k141_100258  | [full]   | 1129  | No | NA | 0 | 1  | Not-determined | Genome-fragment | NA | 0.92  | 0 |
| S1-final-viral-combined_k141_209650  | [full]   | 1267  | No | NA | 1 | 0  | Low-quality    | Genome-fragment | NA | 0     | 0 |
| S1-final-viral-combined_k141_231951  | [full]   | 1267  | No | NA | 0 | 0  | Not-determined | Genome-fragment | NA | 0     | 0 |
| S17-final-viral-combined_k141_123339 | [full]   | 1267  | No | NA | 2 | 0  | Low-quality    | Genome-fragment | NA | 3.48  | 0 |
| S1-final-viral-combined_k141_215806  | [full]   | 12770 | No | NA | 0 | 10 | Not-determined | Genome-fragment | NA | 0     | 0 |
| S1-final-viral-combined_k141_330694  | [full]   | 4167  | No | NA | 0 | 2  | Not-determined | Genome-fragment | NA | 0     | 0 |
| S12_k141_116012                      |          | 1267  | No | NA | 0 | 0  | Low-quality    | Genome-fragment | NA | 0.76  | 0 |
| S1-final-viral-combined_k141_165834  | [full]   | 3191  | No | NA | 0 | 2  | Not-determined | Genome-fragment | NA | 0     | 0 |
| S1-final-viral-combined_k141_100287  | [full]   | 1261  | No | NA | 0 | 1  | Not-determined | Genome-fragment | NA | 0     | 0 |
| S1-final-viral-combined_k141_215846  | [full]   | 3825  | No | NA | 0 | 0  | Not-determined | Genome-fragment | NA | 0     | 0 |
| S1-final-viral-combined_k141_50868   | [H2gene] | 1267  | No | NA | 2 | 0  | Low-quality    | Genome-fragment | NA | 1.98  | 0 |
| S11-final-viral-combined_k141_295836 | [full]   | 1268  | No | NA | 0 | 0  | Low-quality    | Genome-fragment | NA | 2.12  | 0 |
| S11-final-viral-combined_k141_185106 | [H2gene] | 1268  | No | NA | 0 | 0  | Low-quality    | Genome-fragment | NA | 3.71  | 0 |
|                                      |          |       |    |    |   |    |                |                 |    |       |   |



|                                      |          |       |    |    |   |    |                |                 |    |      |
|--------------------------------------|----------|-------|----|----|---|----|----------------|-----------------|----|------|
| S1-final-viral-combined_k141_298237  | [full]   | 2076  | No | NA | 0 | 2  | Not-determined | Genome-fragment | NA | 0    |
| S1-final-viral-combined_k141_232159  | [full]   | 6812  | No | NA | 0 | 6  | Not-determined | Genome-fragment | NA | 0    |
| S1-final-viral-combined_k141_347641  | [full]   | 2238  | No | NA | 0 | 1  | Not-determined | Genome-fragment | NA | 0    |
| S12-final-viral-combined_k141_361815 | [H2gene] | 1269  | No | NA | 1 | 0  | Low-quality    | Genome-fragment | NA | 3.15 |
| S1-final-viral-combined_k141_149844  | [full]   | 1817  | No | NA | 0 | 1  | Not-determined | Genome-fragment | NA | 0    |
| S1-final-viral-combined_k141_362501  | [full]   | 1770  | No | NA | 0 | 0  | Not-determined | Genome-fragment | NA | 0    |
| S2_k141_23623                        |          | 1269  | No | NA | 0 | 0  | Low-quality    | Genome-fragment | NA | 1.3  |
| S1-final-viral-combined_k141_363895  | [full]   | 1868  | No | NA | 0 | 2  | Not-determined | Genome-fragment | NA | 0    |
| S1-final-viral-combined_k141_508041  | [full]   | 1474  | No | NA | 0 | 1  | Not-determined | Genome-fragment | NA | 0    |
| S1-final-viral-combined_k141_84278   | [full]   | 2303  | No | NA | 0 | 1  | Not-determined | Genome-fragment | NA | 0    |
| S4-final-viral-combined_k141_112866  | [full]   | 1269  | No | NA | 1 | 0  | Low-quality    | Genome-fragment | NA | 9.92 |
| S6-final-viral-combined_k141_2095    | [full]   | 1269  | No | NA | 0 | 0  | Low-quality    | Genome-fragment | NA | 0.81 |
| S6_k141_33501                        |          | 1269  | No | NA | 0 | 1  | Low-quality    | Genome-fragment | NA | 0.61 |
| S1-final-viral-combined_k141_166012  | [full]   | 1602  | No | NA | 0 | 1  | Not-determined | Genome-fragment | NA | 0    |
| S9-final-viral-combined_k141_47314   | [full]   | 1270  | No | NA | 0 | 0  | Low-quality    | Genome-fragment | NA | 3.2  |
| S1-final-viral-combined_k141_230798  | [full]   | 1587  | No | NA | 0 | 1  | Not-determined | Genome-fragment | NA | 0    |
| S11-final-viral-combined_k141_72132  | [full]   | 1270  | No | NA | 1 | 0  | Low-quality    | Genome-fragment | NA | 2.67 |
| S11-final-viral-combined_k141_241991 | [full]   | 1270  | No | NA | 0 | 0  | Low-quality    | Genome-fragment | NA | 2.58 |
| S12_k141_156667                      |          | 1270  | No | NA | 0 | 0  | Low-quality    | Genome-fragment | NA | 2.05 |
| S1-final-viral-combined_k141_84323   | [full]   | 2179  | No | NA | 0 | 1  | Not-determined | Genome-fragment | NA | 0    |
| S1-final-viral-combined_k141_133924  | [full]   | 2043  | No | NA | 0 | 2  | Not-determined | Genome-fragment | NA | 0    |
| S7-final-viral-combined_k141_143953  | [full]   | 1270  | No | NA | 0 | 0  | Low-quality    | Genome-fragment | NA | 2    |
| S1-final-viral-combined_k141_183059  | [full]   | 1145  | No | NA | 0 | 0  | Not-determined | Genome-fragment | NA | 0    |
| S7_k141_237871                       |          | 1270  | No | NA | 0 | 1  | Low-quality    | Genome-fragment | NA | 0.3  |
| S12-final-viral-combined_k141_80224  | [full]   | 1270  | No | NA | 1 | 0  | Low-quality    | Genome-fragment | NA | 2.03 |
| S12-final-viral-combined_k141_1557   | [full]   | 1270  | No | NA | 0 | 2  | Low-quality    | Genome-fragment | NA | 0.57 |
| S1-final-viral-combined_k141_84331   | [full]   | 1456  | No | NA | 0 | 1  | Not-determined | Genome-fragment | NA | 0    |
| S1-final-viral-combined_k141_248802  | [full]   | 2049  | No | NA | 0 | 2  | Not-determined | Genome-fragment | NA | 0    |
| S1-final-viral-combined_k141_247051  | [full]   | 1947  | No | NA | 0 | 2  | Not-determined | Genome-fragment | NA | 0    |
| S1-final-viral-combined_k141_298364  | [full]   | 8315  | No | NA | 0 | 6  | Not-determined | Genome-fragment | NA | 0    |
| S2-final-viral-combined_k141_149185  | [full]   | 1270  | No | NA | 0 | 2  | Low-quality    | Genome-fragment | NA | 3.04 |
| S2-final-viral-combined_k141_7712    | [full]   | 1270  | No | NA | 0 | 0  | Low-quality    | Genome-fragment | NA | 0.66 |
| S2-final-viral-combined_k141_144077  | [full]   | 1270  | No | NA | 0 | 0  | Low-quality    | Genome-fragment | NA | 2.36 |
| S1-final-viral-combined_k141_363959  | [full]   | 1139  | No | NA | 0 | 1  | Not-determined | Genome-fragment | NA | 0    |
| S1-final-viral-combined_k141_298169  | [full]   | 4282  | No | NA | 0 | 4  | Not-determined | Genome-fragment | NA | 0    |
| S2_k141_217002                       |          | 1270  | No | NA | 0 | 1  | Low-quality    | Genome-fragment | NA | 0.45 |
| S1-final-viral-combined_k141_298371  | [full]   | 1669  | No | NA | 0 | 1  | Not-determined | Genome-fragment | NA | 0    |
| S6-final-viral-combined_k141_74550   | [full]   | 1270  | No | NA | 0 | 0  | Low-quality    | Genome-fragment | NA | 0.28 |
| S11-final-viral-combined_k141_146178 | [full]   | 1271  | No | NA | 0 | 0  | Low-quality    | Genome-fragment | NA | 0.84 |
| S1-final-viral-combined_k141_50899   | [full]   | 2221  | No | NA | 0 | 1  | Not-determined | Genome-fragment | NA | 0    |
| S1-final-viral-combined_k141_245932  | [full]   | 1841  | No | NA | 0 | 1  | Not-determined | Genome-fragment | NA | 0    |
| S1-final-viral-combined_k141_145946  | [full]   | 1764  | No | NA | 0 | 1  | Not-determined | Genome-fragment | NA | 0    |
| S1-final-viral-combined_k141_134002  | [full]   | 2384  | No | NA | 0 | 2  | Not-determined | Genome-fragment | NA | 0    |
| S11_k141_54609                       |          | 1271  | No | NA | 0 | 0  | Low-quality    | Genome-fragment | NA | 1.1  |
| S1-final-viral-combined_k141_100575  | [full]   | 2589  | No | NA | 0 | 0  | Not-determined | Genome-fragment | NA | 0    |
| S1-final-viral-combined_k141_216142  | [full]   | 1587  | No | NA | 0 | 1  | Not-determined | Genome-fragment | NA | 0    |
| S1-final-viral-combined_k141_218209  | [H2gene] | 1271  | No | NA | 0 | 0  | Low-quality    | Genome-fragment | NA | 2.74 |
| S1_k141_283660                       |          | 1271  | No | NA | 0 | 0  | Low-quality    | Genome-fragment | NA | 5.56 |
| S1-final-viral-combined_k141_248922  | [full]   | 1475  | No | NA | 0 | 0  | Not-determined | Genome-fragment | NA | 0    |
| S1-final-viral-combined_k141_232342  | [full]   | 1878  | No | NA | 0 | 1  | Not-determined | Genome-fragment | NA | 0    |
| S1-final-viral-combined_k141_380353  | [full]   | 3713  | No | NA | 0 | 5  | Not-determined | Genome-fragment | NA | 0    |
| S1-final-viral-combined_k141_150026  | [full]   | 2384  | No | NA | 0 | 1  | Not-determined | Genome-fragment | NA | 0    |
| S17-final-viral-combined_k141_136747 | [full]   | 1271  | No | NA | 1 | 0  | Low-quality    | Genome-fragment | NA | 0.82 |
| S17-final-viral-combined_k141_84807  | [H2gene] | 1271  | No | NA | 1 | 0  | Low-quality    | Genome-fragment | NA | 2.86 |
| S1-final-viral-combined_k141_232363  | [full]   | 1320  | No | NA | 0 | 0  | Not-determined | Genome-fragment | NA | 0    |
| S17-final-viral-combined_k141_23028  | [H2gene] | 1271  | No | NA | 2 | 0  | Low-quality    | Genome-fragment | NA | 2.29 |
| S12-final-viral-combined_k141_202568 | [full]   | 1271  | No | NA | 1 | 0  | Low-quality    | Genome-fragment | NA | 2.27 |
| S1-final-viral-combined_k141_248961  | [full]   | 1870  | No | NA | 0 | 0  | Not-determined | Genome-fragment | NA | 0    |
| S4_k141_52887                        |          | 1271  | No | NA | 0 | 0  | Low-quality    | Genome-fragment | NA | 2.34 |
| S1-final-viral-combined_k141_248980  | [full]   | 3016  | No | NA | 0 | 0  | Not-determined | Genome-fragment | NA | 0    |
| S8-final-viral-combined_k141_207232  | [full]   | 1271  | No | NA | 0 | 0  | Low-quality    | Genome-fragment | NA | 3.09 |
| S9-final-viral-combined_k141_117150  | [full]   | 1272  | No | NA | 0 | 0  | Low-quality    | Genome-fragment | NA | 2.6  |
| S1-final-viral-combined_k141_364030  | [full]   | 1950  | No | NA | 0 | 1  | Not-determined | Genome-fragment | NA | 0    |
| S1-final-viral-combined_k141_183180  | [full]   | 2674  | No | NA | 0 | 1  | Not-determined | Genome-fragment | NA | 0    |
| S11-final-viral-combined_k141_276370 | [full]   | 1272  | No | NA | 0 | 0  | Low-quality    | Genome-fragment | NA | 3.54 |
| S1-final-viral-combined_k141_314820  | [full]   | 7045  | No | NA | 0 | 1  | Not-determined | Genome-fragment | NA | 0    |
| S1-final-viral-combined_k141_216260  | [full]   | 10510 | No | NA | 0 | 2  | Not-determined | Genome-fragment | NA | 0    |
| S11_k141_310567                      |          | 1272  | No | NA | 0 | 0  | Low-quality    | Genome-fragment | NA | 1.82 |
| S1-final-viral-combined_k141_6053    | [full]   | 1272  | No | NA | 0 | 0  | Low-quality    | Genome-fragment | NA | 3.41 |
| S1-final-viral-combined_k141_134149  | [full]   | 1014  | No | NA | 0 | 1  | Not-determined | Genome-fragment | NA | 0    |
| S1-final-viral-combined_k141_51109   | [full]   | 13768 | No | NA | 0 | 11 | Not-determined | Genome-fragment | NA | 0    |
| S1-final-viral-combined_k141_330931  | [full]   | 1360  | No | NA | 0 | 1  | Not-determined | Genome-fragment | NA | 0    |
| S1-final-viral-combined_k141_78447   | [full]   | 1272  | No | NA | 0 | 1  | Low-quality    | Genome-fragment | NA | 1.08 |
| S1-final-viral-combined_k141_5259    | [full]   | 3354  | No | NA | 0 | 1  | Not-determined | Genome-fragment | NA | 0    |
| S1-final-viral-combined_k141_298421  | [full]   | 1191  | No | NA | 0 | 2  | Not-determined | Genome-fragment | NA | 0    |
| S1-final-viral-combined_k141_282012  | [full]   | 2092  | No | NA | 0 | 1  | Not-determined | Genome-fragment | NA | 0    |
| S1-final-viral-combined_k141_845041  | [full]   | 2605  | No | NA | 0 | 1  | Not-determined | Genome-fragment | NA | 0    |
| S1-final-viral-combined_k141_249068  | [full]   | 2202  | No | NA | 0 | 1  | Not-determined | Genome-fragment | NA | 0    |
| S1-final-viral-combined_k141_216101  | [full]   | 3211  | No | NA | 0 | 1  | Not-determined | Genome-fragment | NA | 0    |
| S1-final-viral-combined_k141_183239  | [full]   | 2621  | No | NA | 0 | 3  | Not-determined | Genome-fragment | NA | 0    |
| S1-final-viral-combined_k141_364086  | [full]   | 2317  | No | NA | 0 | 0  | Not-determined | Genome-fragment | NA | 0    |
| S1-final-viral-combined_k141_193714  | [full]   | 20970 | No | NA | 0 | 0  | Not-determined | Genome-fragment | NA | 0    |
| S1-final-viral-combined_k141_364091  | [full]   | 1930  | No | NA | 0 | 0  | Not-determined | Genome-fragment | NA | 0    |
| S3-final-viral-combined_k141_47567   | [full]   | 1272  | No | NA | 0 | 0  | Low-quality    | Genome-fragment | NA | 1.14 |
| S1-final-viral-combined_k141_265058  | [full]   | 1656  | No | NA | 0 | 2  | Not-determined | Genome-fragment | NA | 0    |
| S3-final-viral-combined_k141_100208  | [full]   | 1272  | No | NA | 0 | 0  | Low-quality    | Genome-fragment | NA | 0.82 |
| S12-final-viral-combined_k141_303071 | [full]   | 1272  | No | NA | 1 | 0  | Low-quality    | Genome-fragment | NA | 2.98 |
| S1-final-viral-combined_k141_216341  | [full]   | 1234  | No | NA | 0 | 2  | Not-determined | Genome-fragment | NA | 0    |
| S1-final-viral-combined_k141_298481  | [full]   | 6273  | No | NA | 0 | 4  | Not-determined | Genome-fragment | NA | 0    |
| S12-final-viral-combined_k141_230220 | [full]   | 1272  | No | NA | 1 | 0  | Low-quality    | Genome-fragment | NA | 0.78 |
| S1-final-viral-combined_k141_298499  | [full]   | 1444  | No | NA | 0 | 0  | Not-determined | Genome-fragment | NA | 0    |
| S1-final-viral-combined_k141_100703  | [full]   | 1017  | No | NA | 0 | 2  | Not-determined | Genome-fragment | NA | 0    |
| S1-final-viral-combined_k141_100709  | [full]   | 1086  | No | NA | 0 | 1  | Not-determined | Genome-fragment | NA | 0    |
| S2-final-viral-combined_k141_101933  | [H2gene] | 1272  | No | NA | 1 | 0  | Low-quality    | Genome-fragment | NA | 0.82 |
| S8-final-viral-combined_k141_197749  | [full]   | 1272  | No | NA | 0 | 0  | Low-quality    | Genome-fragment | NA | 0.97 |
| S9-final-viral-combined_k141_24029   | [full]   | 1273  | No | NA | 0 | 2  | Low-quality    | Genome-fragment | NA | 0.4  |
| S1_k141_331007                       |          | 1273  | No | NA | 0 | 0  | Low-quality    | Genome-fragment | NA | 1.94 |
| S1-final-viral-combined_k141_117359  | [full]   | 1273  | No | NA | 0 | 0  | Low-quality    | Genome-fragment | NA | 1.29 |
| S3_k141_33476                        |          | 1273  | No | NA | 0 | 0  | Low-quality    | Genome-fragment | NA | 2.74 |
| S1-final-viral-combined_k141_180524  | [full]   | 1858  | No | NA | 0 | 2  | Not-determined | Genome-fragment | NA | 0    |
| S7-final-viral-combined_k141_84261   | [H2gene] | 1273  | No | NA | 1 | 0  | Low-quality    | Genome-fragment | NA | 3.06 |
| S12_k141_340996                      |          | 1273  | No | NA | 0 | 0  | Low-quality    | Genome-fragment | NA | 2.72 |
| S1-final-viral-combined_k141_18536   | [full]   | 2350  | No | NA | 0 | 1  | Not-determined | Genome-fragment | NA | 0    |
| S1-final-viral-combined_k141_114909  | [full]   | 2072  | No | NA | 0 | 2  | Not-determined | Genome-fragment | NA | 0    |
| S1-final-viral-combined_k141_232145  | [full]   | 2315  | No | NA | 0 | 3  | Not-determined | Genome-fragment | NA | 0    |
| S1-final-viral-combined_k141_166301  | [full]   | 4165  | No | NA | 0 | 4  | Not-determined | Genome-fragment | NA | 0    |
| S2-final-viral-combined_k141_218351  | [full]   | 1273  | No | NA | 1 | 0  | Low-quality    | Genome-fragment | NA | 2.19 |
| S2-final-viral-combined_k141_75321   | [full]   | 1273  | No | NA | 1 | 0  | Low-quality    | Genome-fragment | NA | 3.05 |
| S1-final-viral-combined_k141_51246   | [full]   | 8429  | No | NA | 0 | 1  | Not-determined | Genome-fragment | NA | 0    |
| S1-final-viral-combined_k141_51259   | [full]   | 2502  | No | NA | 0 | 1  | Not-determined | Genome-fragment | NA | 0    |
| S2-final-viral-combined_k141_159714  | [full]   | 1273  | No | NA | 1 | 0  | Low-quality    | Genome-fragment | NA | 3.64 |
| S1-final-viral-combined_k141_314950  | [full]   | 784   | No | NA | 0 | 7  | Not-determined | Genome-fragment | NA | 0    |
| S1-final-viral-combined_k141_93536   | [full]   | 1274  | No | NA | 0 | 0  | Low-quality    | Genome-fragment | NA | 1.8  |
| S1-final-viral-combined_k141_314958  | [full]   | 1718  | No | NA | 0 | 0  | Not-determined | Genome-fragment | NA | 0    |
| S5_k141_2420                         |          | 1274  | No | NA | 0 | 0  | Low-quality    | Genome-fragment | NA | 2.01 |
| S1-final-viral-combined_k141_380551  | [full]   | 8050  | No | NA | 0 | 5  | Not-determined | Genome-fragment | NA | 0    |
| S7-final-viral-combined_k141_34292   | [full]   | 1274  | No | NA | 0 | 0  | Low-quality    | Genome-fragment | NA | 3.21 |
| S1-final-viral-combined_k141_185886  | [full]   | 7915  | No | NA | 0 | 8  | Not-determined | Genome-fragment | NA | 0    |
| S1-final-viral-combined_k141_216457  | [full]   | 3126  | No | NA | 0 | 3  | Not-determined | Genome-fragment | NA | 0    |
| S7_k141_191709                       |          | 1274  | No | NA | 0 | 1  | Low-quality    | Genome-fragment | NA | 2.88 |
| S17-final-viral-combined_k141_106828 | [H2gene] | 1274  | No | NA | 1 | 0  | Low-quality    | Genome-fragment | NA | 1.86 |
| S1-final-viral-combined_k141_17457   | [full]   | 5007  | No | NA | 0 | 1  | Not-determined | Genome-fragment | NA | 0    |
| S1-final-viral-combined_k141_18591   | [full]   | 3684  | No | NA | 0 | 1  | Not-determined | Genome-fragment | NA | 0    |
| S1-final-viral-combined_k141_380562  | [full]   | 2154  | No | NA | 0 | 3  | Not-determined | Genome-fragment | NA | 0    |
| S1-final-viral-combined_k141_183159  | [full]   | 1487  | No | NA | 0 | 0  | Not-determined | Genome-fragment | NA | 0    |
| S1-final-viral-combined_k141_117464  | [full]   | 3600  | No | NA | 0 | 3  | Not-determined | Genome-fragment | NA | 0    |
| S17-final-viral-combined_k141_227178 | [H2gene] | 1274  | No | NA | 1 | 0  | Low-quality    | Genome-fragment | NA | 3.12 |
| S1-final-viral-combined_k141_351651  | [full]   | 1984  | No | NA | 0 | 0  | Not-determined | Genome-fragment | NA | 0    |
| S1-final-viral-combined_k141_67547   | [full]   | 8953  | No | NA | 0 | 5  | Not-determined | Genome-fragment | NA | 0    |
| S12-final-viral-combined_k141_93953  | [full]   | 1274  | No | NA | 0 | 0  | Low-quality    | Genome-fragment | NA | 3.37 |
| S12-final-viral-combined_k141_143    |          |       |    |    |   |    |                |                 |    |      |



|                                               |       |    |    |    |    |                |                 |       |   |
|-----------------------------------------------|-------|----|----|----|----|----------------|-----------------|-------|---|
| S9-final-viral-combined_k141_131351 [H2gene]  | 1276  | No | NA | 1  | 0  | Low-quality    | Genome-fragment | 4.04  | 0 |
| S1-final-viral-combined_k141_2801 [Full]      | 2086  | No | NA | 0  | 1  | Not-determined | Genome-fragment | NA    | 0 |
| S1-final-viral-combined_k141_380734 [Full]    | 1827  | No | NA | 0  | 0  | Not-determined | Genome-fragment | NA    | 0 |
| S9_k141_97622                                 | 1276  | No | NA | 0  | 1  | Low-quality    | Genome-fragment | 3.14  | 0 |
| S1-final-viral-combined_k141_298784 [Full]    | 1141  | No | NA | 0  | 0  | Not-determined | Genome-fragment | NA    | 0 |
| S1-final-viral-combined_k141_232747 [Full]    | 3481  | No | NA | 0  | 3  | Not-determined | Genome-fragment | NA    | 0 |
| S1-final-viral-combined_k141_265302 [Full]    | 4589  | No | NA | 0  | 2  | Not-determined | Genome-fragment | NA    | 0 |
| S1-final-viral-combined_k141_150348 [Full]    | 2404  | No | NA | 0  | 1  | Not-determined | Genome-fragment | NA    | 0 |
| S11_k141_144273                               | 1276  | No | NA | 0  | 0  | Low-quality    | Genome-fragment | 2.28  | 0 |
| S1-final-viral-combined_k141_298822 [Full]    | 4036  | No | NA | 0  | 3  | Not-determined | Genome-fragment | NA    | 0 |
| S7-final-viral-combined_k141_73133 [Full]     | 1276  | No | NA | 1  | 0  | Low-quality    | Genome-fragment | 2.69  | 0 |
| S12-final-viral-combined_k141_228962 [Full]   | 1276  | No | NA | 0  | 0  | Low-quality    | Genome-fragment | 1.13  | 0 |
| S4_k141_161294                                | 1276  | No | NA | 0  | 1  | Low-quality    | Genome-fragment | 0.21  | 0 |
| S1-final-viral-combined_k141_166494 [Full]    | 2066  | No | NA | 0  | 1  | Not-determined | Genome-fragment | NA    | 0 |
| S1-final-viral-combined_k141_312125 [Full]    | 2170  | No | NA | 0  | 1  | Not-determined | Genome-fragment | NA    | 0 |
| S6-final-viral-combined_k141_132581 [Full]    | 1276  | No | NA | 0  | 0  | Low-quality    | Genome-fragment | 0.81  | 0 |
| S1-final-viral-combined_k141_100856 [Full]    | 3924  | No | NA | 0  | 4  | Not-determined | Genome-fragment | NA    | 0 |
| S8-final-viral-combined_k141_199135 [Full]    | 1276  | No | NA | 3  | 0  | Low-quality    | Genome-fragment | 2.61  | 0 |
| S1-final-viral-combined_k141_159301 [Full]    | 1277  | No | NA | 0  | 0  | Low-quality    | Genome-fragment | 2.43  | 0 |
| S1-final-viral-combined_k141_282300 [Full]    | 2805  | No | NA | 0  | 3  | Not-determined | Genome-fragment | NA    | 0 |
| S5-final-viral-combined_k141_155443 [Full]    | 1277  | No | NA | 0  | 0  | Low-quality    | Genome-fragment | 2     | 0 |
| S7-final-viral-combined_k141_207165 [Full]    | 1277  | No | NA | 1  | 0  | Low-quality    | Genome-fragment | 3.42  | 0 |
| S1-final-viral-combined_k141_298862 [Full]    | 1153  | No | NA | 0  | 1  | Not-determined | Genome-fragment | NA    | 0 |
| S7-final-viral-combined_k141_401777 [Full]    | 1277  | No | NA | 1  | 0  | Low-quality    | Genome-fragment | 3.87  | 0 |
| S1-final-viral-combined_k141_282312 [Full]    | 1880  | No | NA | 0  | 0  | Not-determined | Genome-fragment | NA    | 0 |
| S1-final-viral-combined_k141_166512 [Full]    | 2342  | No | NA | 0  | 1  | Not-determined | Genome-fragment | NA    | 0 |
| S7-final-viral-combined_k141_79832 [Full]     | 1277  | No | NA | 0  | 1  | Low-quality    | Genome-fragment | 1.85  | 0 |
| S1-final-viral-combined_k141_232865 [Full]    | 1514  | No | NA | 0  | 2  | Not-determined | Genome-fragment | NA    | 0 |
| S1-final-viral-combined_k141_134565 [Full]    | 2563  | No | NA | 0  | 2  | Not-determined | Genome-fragment | NA    | 0 |
| S12-final-viral-combined_k141_282931 [Full]   | 1277  | No | NA | 0  | 1  | Low-quality    | Genome-fragment | 0.75  | 0 |
| S8-final-viral-combined_k141_164426 [Full]    | 1277  | No | NA | 0  | 0  | Low-quality    | Genome-fragment | 2.78  | 0 |
| S1-final-viral-combined_k141_282162 [Full]    | 2157  | No | NA | 0  | 0  | Not-determined | Genome-fragment | NA    | 0 |
| S9-final-viral-combined_k141_30932 [Full]     | 1278  | No | NA | 0  | 1  | Low-quality    | Genome-fragment | 2.56  | 0 |
| S9_k141_97946                                 | 1278  | No | NA | 2  | 0  | Low-quality    | Genome-fragment | 3.75  | 0 |
| S9_k141_28440                                 | 1278  | No | NA | 0  | 0  | Low-quality    | Genome-fragment | 1.37  | 0 |
| S1-final-viral-combined_k141_315214 [Full]    | 1804  | No | NA | 0  | 2  | Not-determined | Genome-fragment | NA    | 0 |
| S1-final-viral-combined_k141_134610 [Full]    | 2055  | No | NA | 0  | 1  | Not-determined | Genome-fragment | NA    | 0 |
| S1-final-viral-combined_k141_100929 [Full]    | 8310  | No | NA | 0  | 5  | Not-determined | Genome-fragment | NA    | 0 |
| S1-final-viral-combined_k141_200146 [Full]    | 1553  | No | NA | 0  | 0  | Not-determined | Genome-fragment | NA    | 0 |
| S1-final-viral-combined_k141_100934 [Full]    | 1982  | No | NA | 0  | 0  | Not-determined | Genome-fragment | NA    | 0 |
| S1-final-viral-combined_k141_35429 [Full]     | 10905 | No | NA | 0  | 8  | Not-determined | Genome-fragment | NA    | 0 |
| S1-final-viral-combined_k141_35438 [Full]     | 1072  | No | NA | 0  | 0  | Not-determined | Genome-fragment | NA    | 0 |
| S1-final-viral-combined_k141_315245 [Full]    | 1040  | No | NA | 0  | 1  | Not-determined | Genome-fragment | NA    | 0 |
| S11-final-viral-combined_k141_277392 [Full]   | 1278  | No | NA | 2  | 0  | Low-quality    | Genome-fragment | 2.52  | 0 |
| S1-final-viral-combined_k141_18960 [Full]     | 2155  | No | NA | 0  | 1  | Not-determined | Genome-fragment | NA    | 0 |
| S11-final-viral-combined_k141_215820 [Full]   | 1278  | No | NA | 0  | 0  | Low-quality    | Genome-fragment | 2.47  | 0 |
| S1-final-viral-combined_k141_85004 [Full]     | 9532  | No | NA | 0  | 8  | Not-determined | Genome-fragment | NA    | 0 |
| S11_k141_34522                                | 1278  | No | NA | 2  | 0  | Low-quality    | Genome-fragment | 1.55  | 0 |
| S1-final-viral-combined_k141_117799 [Full]    | 1339  | No | NA | 0  | 0  | Not-determined | Genome-fragment | NA    | 0 |
| S1-final-viral-combined_k141_163768 [Full]    | 1278  | No | NA | 0  | 1  | Low-quality    | Genome-fragment | 1.74  | 0 |
| S1-final-viral-combined_k141_117811 [Full]    | 2672  | No | NA | 0  | 2  | Not-determined | Genome-fragment | NA    | 0 |
| S1-final-viral-combined_k141_189241 [Full]    | 2151  | No | NA | 0  | 1  | Not-determined | Genome-fragment | NA    | 0 |
| S1-final-viral-combined_k141_323733 [H2gene]  | 1278  | No | NA | 1  | 0  | Low-quality    | Genome-fragment | 2.01  | 0 |
| S1-final-viral-combined_k141_265385 [Full]    | 7166  | No | NA | 0  | 2  | Not-determined | Genome-fragment | NA    | 0 |
| S1-final-viral-combined_k141_248182 [Full]    | 1133  | No | NA | 0  | 2  | Not-determined | Genome-fragment | NA    | 0 |
| S9-final-viral-combined_k141_40112 [Full]     | 1278  | No | NA | 0  | 0  | Low-quality    | Genome-fragment | 1.52  | 0 |
| S3-final-viral-combined_k141_130695 [H2gene]  | 1278  | No | NA | 1  | 0  | Low-quality    | Genome-fragment | 2.89  | 0 |
| S1-final-viral-combined_k141_284206 [Full]    | 1849  | No | NA | 0  | 2  | Not-determined | Genome-fragment | NA    | 0 |
| S6-final-viral-combined_k141_154669 [Full]    | 1278  | No | NA | 0  | 0  | Low-quality    | Genome-fragment | 0.73  | 0 |
| S1-final-viral-combined_k141_331403 [Full]    | 1776  | No | NA | 0  | 2  | Not-determined | Genome-fragment | NA    | 0 |
| S5_k141_148029                                | 1278  | No | NA | 0  | 1  | Low-quality    | Genome-fragment | 3.08  | 0 |
| S1-final-viral-combined_k141_67893 [Full]     | 1732  | No | NA | 0  | 0  | Not-determined | Genome-fragment | NA    | 0 |
| S17-k141_126021                               | 1278  | No | NA | 0  | 0  | Low-quality    | Genome-fragment | 2.24  | 0 |
| S12-final-viral-combined_k141_236201 [Full]   | 1278  | No | NA | 0  | 0  | Low-quality    | Genome-fragment | 2.87  | 0 |
| S12_k141_116336                               | 1278  | No | NA | 0  | 0  | Low-quality    | Genome-fragment | 2.36  | 0 |
| S1-final-viral-combined_k141_364641 [Full]    | 12703 | No | NA | 0  | 5  | Not-determined | Genome-fragment | NA    | 0 |
| S1-final-viral-combined_k141_298963 [Full]    | 3330  | No | NA | 0  | 3  | Not-determined | Genome-fragment | NA    | 0 |
| S2-final-viral-combined_k141_94967 [Full]     | 1278  | No | NA | 0  | 0  | Low-quality    | Genome-fragment | 1.1   | 0 |
| S1-final-viral-combined_k141_216951 [Full]    | 2094  | No | NA | 0  | 0  | Not-determined | Genome-fragment | NA    | 0 |
| S2-final-viral-combined_k141_7633 [Full]      | 1278  | No | NA | 0  | 0  | Low-quality    | Genome-fragment | 1.89  | 0 |
| S1-final-viral-combined_k141_249603 [Full]    | 2015  | No | NA | 0  | 0  | Not-determined | Genome-fragment | NA    | 0 |
| S4-final-viral-combined_k141_61823 [Full]     | 1278  | No | NA | 0  | 2  | Low-quality    | Genome-fragment | 0.93  | 0 |
| S4_k141_69556                                 | 1278  | No | NA | 0  | 0  | Low-quality    | Genome-fragment | 2.31  | 0 |
| S9-final-viral-combined_k141_110446 [Full]    | 1279  | No | NA | 0  | 0  | Low-quality    | Genome-fragment | 0.56  | 0 |
| S1-final-viral-combined_k141_7633 [Full]      | 1279  | No | NA | 0  | 0  | Low-quality    | Genome-fragment | 2.83  | 0 |
| S1-final-viral-combined_k141_19017 [Full]     | 9596  | No | NA | 1  | 6  | Not-determined | Genome-fragment | NA    | 0 |
| S1-final-viral-combined_k141_35544 [Full]     | 2790  | No | NA | 0  | 1  | Not-determined | Genome-fragment | NA    | 0 |
| S1-final-viral-combined_k141_282445 [Full]    | 16050 | No | NA | 0  | 13 | Not-determined | Genome-fragment | NA    | 0 |
| S1-final-viral-combined_k141_384710 [Full]    | 5210  | No | NA | 0  | 4  | Not-determined | Genome-fragment | NA    | 0 |
| S1-final-viral-combined_k141_19031 [Full]     | 32923 | No | NA | 24 | 0  | High-quality   | High-quality    | 90.89 | 0 |
| S1-final-viral-combined_k141_35585 [Full]     | 1758  | No | NA | 0  | 0  | Not-determined | Genome-fragment | NA    | 0 |
| S1-final-viral-combined_k141_134769 [Full]    | 2160  | No | NA | 0  | 2  | Not-determined | Genome-fragment | NA    | 0 |
| S1-final-viral-combined_k141_361745 [Full]    | 1279  | No | NA | 0  | 1  | Low-quality    | Genome-fragment | 2.27  | 0 |
| S1-final-viral-combined_k141_101311 [Full]    | 2438  | No | NA | 0  | 0  | Not-determined | Genome-fragment | NA    | 0 |
| S1_k141_197480                                | 1279  | No | NA | 0  | 0  | Low-quality    | Genome-fragment | 4.46  | 0 |
| S1-final-viral-combined_k141_118590 [H2gene]  | 1279  | No | NA | 1  | 0  | Low-quality    | Genome-fragment | 3.87  | 0 |
| S1-final-viral-combined_k141_117936 [Full]    | 3822  | No | NA | 0  | 3  | Not-determined | Genome-fragment | NA    | 0 |
| S2-final-viral-combined_k141_150685 [Full]    | 1465  | No | NA | 0  | 2  | Not-determined | Genome-fragment | NA    | 0 |
| S6-final-viral-combined_k141_193833 [Full]    | 1279  | No | NA | 0  | 0  | Low-quality    | Genome-fragment | 1.13  | 0 |
| S1-final-viral-combined_k141_282346 [Full]    | 1444  | No | NA | 0  | 1  | Not-determined | Genome-fragment | NA    | 0 |
| S5-final-viral-combined_k141_105197 [H2gene]  | 1279  | No | NA | 1  | 0  | Low-quality    | Genome-fragment | 1.8   | 0 |
| S1-final-viral-combined_k141_117951 [Full]    | 1724  | No | NA | 0  | 0  | Not-determined | Genome-fragment | NA    | 0 |
| S1-final-viral-combined_k141_85124 [Full]     | 1783  | No | NA | 0  | 1  | Not-determined | Genome-fragment | NA    | 0 |
| S17-final-viral-combined_k141_249103 [Full]   | 1279  | No | NA | 0  | 1  | Low-quality    | Genome-fragment | 0.78  | 0 |
| S1-final-viral-combined_k141_67972 [Full]     | 1606  | No | NA | 0  | 0  | Not-determined | Genome-fragment | NA    | 0 |
| S1-final-viral-combined_k141_233047 [Full]    | 7150  | No | NA | 0  | 0  | Not-determined | Genome-fragment | NA    | 0 |
| S1-final-viral-combined_k141_348379 [Full]    | 3411  | No | NA | 0  | 1  | Not-determined | Genome-fragment | NA    | 0 |
| S17-final-viral-combined_k141_114672 [H2gene] | 1279  | No | NA | 1  | 0  | Low-quality    | Genome-fragment | 2.13  | 0 |
| S2-final-viral-combined_k141_38518 [H2gene]   | 1279  | No | NA | 0  | 0  | Low-quality    | Genome-fragment | 3.78  | 0 |
| S1-final-viral-combined_k141_200768 [Full]    | 1280  | No | NA | 0  | 1  | Low-quality    | Genome-fragment | 1.04  | 0 |
| S11-final-viral-combined_k141_165338 [H2gene] | 1280  | No | NA | 1  | 0  | Low-quality    | Genome-fragment | 2.33  | 0 |
| S1-final-viral-combined_k141_299171 [Full]    | 1093  | No | NA | 0  | 2  | Not-determined | Genome-fragment | NA    | 0 |
| S1-final-viral-combined_k141_192703 [Full]    | 1280  | No | NA | 0  | 1  | Low-quality    | Genome-fragment | 2.28  | 0 |
| S1-final-viral-combined_k141_166678 [Full]    | 1838  | No | NA | 0  | 0  | Not-determined | Genome-fragment | NA    | 0 |
| S1-final-viral-combined_k141_517377 [Full]    | 1002  | No | NA | 0  | 1  | Not-determined | Genome-fragment | NA    | 0 |
| S1-final-viral-combined_k141_249800 [Full]    | 1242  | No | NA | 0  | 1  | Not-determined | Genome-fragment | NA    | 0 |
| S5-final-viral-combined_k141_117598 [Full]    | 1280  | No | NA | 0  | 0  | Low-quality    | Genome-fragment | 2.24  | 0 |
| S1-final-viral-combined_k141_35647 [Full]     | 2276  | No | NA | 0  | 3  | Not-determined | Genome-fragment | NA    | 0 |
| S1-final-viral-combined_k141_384786 [Full]    | 1786  | No | NA | 0  | 0  | Not-determined | Genome-fragment | NA    | 0 |
| S1-final-viral-combined_k141_384855 [Full]    | 2670  | No | NA | 0  | 1  | Not-determined | Genome-fragment | NA    | 0 |
| S1-final-viral-combined_k141_35652 [Full]     | 1658  | No | NA | 0  | 2  | Not-determined | Genome-fragment | NA    | 0 |
| S1-final-viral-combined_k141_315474 [Full]    | 3917  | No | NA | 0  | 2  | Not-determined | Genome-fragment | NA    | 0 |
| S17-final-viral-combined_k141_5963 [Full]     | 1280  | No | NA | 1  | 0  | Low-quality    | Genome-fragment | 1.83  | 0 |
| S1-final-viral-combined_k141_200283 [Full]    | 2335  | No | NA | 0  | 3  | Not-determined | Genome-fragment | NA    | 0 |
| S1-final-viral-combined_k141_166713 [Full]    | 7384  | No | NA | 0  | 1  | Not-determined | Genome-fragment | NA    | 0 |
| S1-final-viral-combined_k141_183965 [Full]    | 1463  | No | NA | 0  | 1  | Not-determined | Genome-fragment | NA    | 0 |
| S1-final-viral-combined_k141_200289 [Full]    | 5690  | No | NA | 0  | 1  | Not-determined | Genome-fragment | NA    | 0 |
| S12-final-viral-combined_k141_239771 [Full]   | 1280  | No | NA | 0  | 0  | Low-quality    | Genome-fragment | 2.41  | 0 |
| S12-final-viral-combined_k141_22958 [Full]    | 1280  | No | NA | 0  | 0  | Low-quality    | Genome-fragment | 1.82  | 0 |
| S1-final-viral-combined_k141_315507 [Full]    | 1661  | No | NA | 0  | 1  | Not-determined | Genome-fragment | NA    | 0 |
| S1-final-viral-combined_k141_183975 [Full]    | 1105  | No | NA | 0  | 1  | Not-determined | Genome-fragment | NA    | 0 |
| S1-final-viral-combined_k141_384829 [Full]    | 2216  | No | NA | 0  | 2  | Not-determined | Genome-fragment | NA    | 0 |
| S1-final-viral-combined_k141_35686 [Full]     | 4294  | No | NA | 0  | 1  | Not-determined | Genome-fragment | NA    | 0 |
| S1-final-viral-combined_k141_215537 [Full]    | 2443  | No | NA | 0  | 1  | Not-determined | Genome-fragment | NA    | 0 |
| S1-final-viral-combined_k141_282866 [Full]    | 1498  | No | NA | 0  | 3  | Not-determined | Genome-fragment | NA    | 0 |
| S1-final-viral-combined_k141_35710 [Full]     | 1666  | No | NA | 0  | 0  | Not-determined | Genome-fragment | NA    | 0 |
| S1-final-viral-combined_k141_348530 [Full]    | 1998  | No | NA | 0  | 2  | Not-determined | Genome-fragment | NA    | 0 |
| S1-final-viral-combined_k141_134817 [Full]    | 65137 | No | NA | 0  | 1  | Not-determined | Genome-fragment | NA    | 0 |
| S2-final-viral-combined_k141_222099 [H2gene]  | 1280  | No | NA | 2  | 0  | Low-quality    | Genome-fragment | 4.66  | 0 |
| S2_k141_111917                                | 1280  | No | NA | 0  | 0  | Low-quality    | Genome-fragment | 1.75  | 0 |
| S4-final-viral-combined_k141_76405 [Full]     | 1280  | No | NA | 3  | 0  | Low-quality    | Genome-fragment | 2.99  | 0 |
| S1-final-viral-combined_k141_150979 [Full]    | 1424  | No | NA | 0  | 0  | Not-determined | Genome-fragment | NA    | 0 |
| S1-final-viral-combined_k141_118064 [Full]    | 5054  | No | NA | 0  | 1  | Not-determined | Genome-fragment | NA    | 0 |
| S1-final-viral-combined_k141_315593 [Full]    | 1263  | No | NA | 0  | 3  | Not-determined | Genome-fragment | NA    | 0 |
| S6_k141_7765                                  | 1280  | No | NA | 0  | 1  | Low-quality    | Genome-fragment | 0.71  | 0 |
| S8-final-viral-combined_k141_221263 [Full]    | 1280  | No | NA | 0  | 0  | Low-quality    |                 |       |   |



|                                      |          |       |    |    |    |   |                |                 |    |       |
|--------------------------------------|----------|-------|----|----|----|---|----------------|-----------------|----|-------|
| S1-final-viral-combined_k141_118160  | [full]   | 2847  | No | NA | 0  | 4 | Not-determined | Genome-fragment | NA | 0     |
| S9-final-viral-combined_k141_148981  | [full]   | 1283  | No | NA | 0  | 0 | Low-quality    | Genome-fragment | NA | 3.33  |
| S1-final-viral-combined_k141_184217  | [full]   | 2419  | No | NA | 0  | 1 | Not-determined | Genome-fragment | NA | 0     |
| S9-final-viral-combined_k141_419     | [H2gene] | 1283  | No | NA | 1  | 0 | Low-quality    | Genome-fragment | NA | 2.91  |
| S1-final-viral-combined_k141_258647  | [full]   | 1283  | No | NA | 2  | 0 | Low-quality    | Genome-fragment | NA | 2.15  |
| S1-final-viral-combined_k141_282200  | [full]   | 1283  | No | NA | 0  | 0 | Low-quality    | Genome-fragment | NA | 0     |
| S1-final-viral-combined_k141_184239  | [full]   | 1975  | No | NA | 0  | 0 | Not-determined | Genome-fragment | NA | 0     |
| S1-final-viral-combined_k141_447161  | [H2gene] | 1283  | No | NA | 1  | 0 | Low-quality    | Genome-fragment | NA | 2.81  |
| S1-final-viral-combined_k141_315698  | [full]   | 2708  | No | NA | 0  | 1 | Not-determined | Genome-fragment | NA | 0     |
| S1_k141_101906                       |          | 1283  | No | NA | 1  | 0 | Low-quality    | Genome-fragment | NA | 2.97  |
| S1_k141_45051                        |          | 1283  | No | NA | 0  | 0 | Low-quality    | Genome-fragment | NA | 2.88  |
| S1-final-viral-combined_k141_282791  | [full]   | 2242  | No | NA | 0  | 0 | Not-determined | Genome-fragment | NA | 0     |
| S1-final-viral-combined_k141_3151    | [full]   | 1035  | No | NA | 0  | 0 | Not-determined | Genome-fragment | NA | 0     |
| S7_k141_197203                       |          | 1283  | No | NA | 0  | 0 | Low-quality    | Genome-fragment | NA | 3.09  |
| S8-final-viral-combined_k141_68802   | [full]   | 1283  | No | NA | 0  | 0 | Low-quality    | Genome-fragment | NA | 2.09  |
| S1-final-viral-combined_k141_151021  | [full]   | 1517  | No | NA | 0  | 1 | Not-determined | Genome-fragment | NA | 0     |
| S1-final-viral-combined_k141_381237  | [full]   | 5758  | No | NA | 0  | 2 | Not-determined | Genome-fragment | NA | 0     |
| S1-final-viral-combined_k141_118167  | [full]   | 50249 | No | NA | 19 | 1 | Medium-quality | Genome-fragment | NA | 82.74 |
| S1-final-viral-combined_k141_248314  | [full]   | 5467  | No | NA | 0  | 3 | Not-determined | Genome-fragment | NA | 0     |
| S1-final-viral-combined_k141_118179  | [full]   | 1306  | No | NA | 0  | 2 | Not-determined | Genome-fragment | NA | 0     |
| S1-final-viral-combined_k141_365071  | [full]   | 2683  | No | NA | 0  | 1 | Not-determined | Genome-fragment | NA | 0     |
| S1-final-viral-combined_k141_299558  | [full]   | 4412  | No | NA | 0  | 0 | Not-determined | Genome-fragment | NA | 0     |
| S1-final-viral-combined_k141_166838  | [full]   | 2515  | No | NA | 0  | 0 | Not-determined | Genome-fragment | NA | 0     |
| S1-final-viral-combined_k141_331775  | [full]   | 1468  | No | NA | 0  | 0 | Not-determined | Genome-fragment | NA | 0     |
| S1-final-viral-combined_k141_68288   | [full]   | 2902  | No | NA | 0  | 1 | Not-determined | Genome-fragment | NA | 0     |
| S1-final-viral-combined_k141_166846  | [full]   | 4543  | No | NA | 0  | 7 | Not-determined | Genome-fragment | NA | 0     |
| S8-final-viral-combined_k141_188585  | [full]   | 1283  | No | NA | 1  | 0 | Low-quality    | Genome-fragment | NA | 2.19  |
| S1-final-viral-combined_k141_19376   | [full]   | 2693  | No | NA | 0  | 1 | Not-determined | Genome-fragment | NA | 0     |
| S1-final-viral-combined_k141_299574  | [full]   | 7245  | No | NA | 0  | 7 | Not-determined | Genome-fragment | NA | 0     |
| S9-final-viral-combined_k141_16105   | [full]   | 1284  | No | NA | 0  | 0 | Low-quality    | Genome-fragment | NA | 0.91  |
| S11-final-viral-combined_k141_153401 | [full]   | 1284  | No | NA | 2  | 0 | Low-quality    | Genome-fragment | NA | 2.12  |
| S1-final-viral-combined_k141_382148  | [full]   | 1284  | No | NA | 1  | 0 | Low-quality    | Genome-fragment | NA | 2.36  |
| S1-final-viral-combined_k141_101441  | [full]   | 7714  | No | NA | 0  | 7 | Not-determined | Genome-fragment | NA | 0     |
| S1-final-viral-combined_k141_184317  | [full]   | 2425  | No | NA | 0  | 1 | Not-determined | Genome-fragment | NA | 0     |
| S1-final-viral-combined_k141_168692  | [full]   | 1159  | No | NA | 0  | 1 | Not-determined | Genome-fragment | NA | 0     |
| S1-final-viral-combined_k141_12059   | [full]   | 3919  | No | NA | 0  | 1 | Not-determined | Genome-fragment | NA | 0     |
| S1-final-viral-combined_k141_183843  | [H2gene] | 1284  | No | NA | 1  | 0 | Low-quality    | Genome-fragment | NA | 0.69  |
| S5_k141_27573                        |          | 1284  | No | NA | 0  | 0 | Low-quality    | Genome-fragment | NA | 3.25  |
| S1-final-viral-combined_k141_151062  | [full]   | 2658  | No | NA | 0  | 2 | Not-determined | Genome-fragment | NA | 0     |
| S1-final-viral-combined_k141_135108  | [full]   | 3830  | No | NA | 0  | 4 | Not-determined | Genome-fragment | NA | 0     |
| S1-final-viral-combined_k141_135117  | [full]   | 2467  | No | NA | 0  | 2 | Not-determined | Genome-fragment | NA | 0     |
| S7-final-viral-combined_k141_57547   | [full]   | 1284  | No | NA | 0  | 0 | Low-quality    | Genome-fragment | NA | 1.17  |
| S1-final-viral-combined_k141_331801  | [full]   | 1086  | No | NA | 0  | 1 | Not-determined | Genome-fragment | NA | 0     |
| S17-final-viral-combined_k141_117860 | [full]   | 1284  | No | NA | 0  | 0 | Low-quality    | Genome-fragment | NA | 10.2  |
| S17-k141_256849                      |          | 1284  | No | NA | 0  | 0 | Low-quality    | Genome-fragment | NA | 2.71  |
| S1-final-viral-combined_k141_331826  | [full]   | 1787  | No | NA | 0  | 1 | Not-determined | Genome-fragment | NA | 0     |
| S17-k141_1719                        |          | 1284  | No | NA | 3  | 0 | Low-quality    | Genome-fragment | NA | 2.88  |
| S1-final-viral-combined_k141_250104  | [full]   | 3834  | No | NA | 0  | 0 | Not-determined | Genome-fragment | NA | 0     |
| S1-final-viral-combined_k141_166840  | [full]   | 2541  | No | NA | 0  | 2 | Not-determined | Genome-fragment | NA | 0     |
| S1-final-viral-combined_k141_151820  | [full]   | 3107  | No | NA | 0  | 1 | Not-determined | Genome-fragment | NA | 0     |
| S1-final-viral-combined_k141_148843  | [full]   | 1999  | No | NA | 0  | 2 | Not-determined | Genome-fragment | NA | 0     |
| S12-final-viral-combined_k141_20407  | [full]   | 1284  | No | NA | 0  | 1 | Low-quality    | Genome-fragment | NA | 0.78  |
| S1-final-viral-combined_k141_166959  | [full]   | 6692  | No | NA | 0  | 5 | Not-determined | Genome-fragment | NA | 0     |
| S12-final-viral-combined_k141_80969  | [full]   | 1284  | No | NA | 1  | 0 | Low-quality    | Genome-fragment | NA | 0.59  |
| S12_k141_362757                      |          | 1284  | No | NA | 0  | 0 | Low-quality    | Genome-fragment | NA | 0.7   |
| S1-final-viral-combined_k141_118306  | [full]   | 1556  | No | NA | 0  | 1 | Not-determined | Genome-fragment | NA | 0     |
| S1-final-viral-combined_k141_118308  | [full]   | 4195  | No | NA | 0  | 5 | Not-determined | Genome-fragment | NA | 0     |
| S2_k141_80593                        |          | 1284  | No | NA | 1  | 0 | Low-quality    | Genome-fragment | NA | 3.04  |
| S1-final-viral-combined_k141_283014  | [full]   | 2189  | No | NA | 0  | 0 | Not-determined | Genome-fragment | NA | 0     |
| S1-final-viral-combined_k141_381368  | [full]   | 3482  | No | NA | 0  | 2 | Not-determined | Genome-fragment | NA | 0     |
| S1-final-viral-combined_k141_283024  | [full]   | 2296  | No | NA | 0  | 2 | Not-determined | Genome-fragment | NA | 0     |
| S1-final-viral-combined_k141_118117  | [full]   | 2583  | No | NA | 0  | 0 | Not-determined | Genome-fragment | NA | 0     |
| S1-final-viral-combined_k141_331896  | [full]   | 2459  | No | NA | 1  | 0 | Medium-quality | Genome-fragment | NA | 82.78 |
| S1-final-viral-combined_k141_118138  | [full]   | 3406  | No | NA | 0  | 1 | Not-determined | Genome-fragment | NA | 0     |
| S6-final-viral-combined_k141_133638  | [H2gene] | 1284  | No | NA | 0  | 0 | Low-quality    | Genome-fragment | NA | 2.4   |
| S1-final-viral-combined_k141_184468  | [full]   | 1440  | No | NA | 0  | 1 | Not-determined | Genome-fragment | NA | 0     |
| S1-final-viral-combined_k141_52159   | [full]   | 1873  | No | NA | 0  | 1 | Not-determined | Genome-fragment | NA | 0     |
| S1-final-viral-combined_k141_151126  | [full]   | 9387  | No | NA | 0  | 1 | Not-determined | Genome-fragment | NA | 0     |
| S1-final-viral-combined_k141_19500   | [full]   | 8178  | No | NA | 10 | 0 | Not-determined | Genome-fragment | NA | 0     |
| S9-final-viral-combined_k141_10250   | [full]   | 1285  | No | NA | 1  | 0 | Low-quality    | Genome-fragment | NA | 2.72  |
| S9-final-viral-combined_k141_108846  | [H2gene] | 1285  | No | NA | 0  | 0 | Low-quality    | Genome-fragment | NA | 3.13  |
| S9-final-viral-combined_k141_24094   | [H2gene] | 1285  | No | NA | 0  | 0 | Low-quality    | Genome-fragment | NA | 3.46  |
| S7-final-viral-combined_k141_151312  | [full]   | 1285  | No | NA | 0  | 0 | Low-quality    | Genome-fragment | NA | 0.88  |
| S1-final-viral-combined_k141_250168  | [full]   | 3547  | No | NA | 0  | 1 | Not-determined | Genome-fragment | NA | 0     |
| S12-final-viral-combined_k141_95238  | [full]   | 1285  | No | NA | 0  | 1 | Low-quality    | Genome-fragment | NA | 0.42  |
| S1-final-viral-combined_k141_184510  | [full]   | 1893  | No | NA | 0  | 2 | Not-determined | Genome-fragment | NA | 0     |
| S12-final-viral-combined_k141_7818   | [H2gene] | 1285  | No | NA | 1  | 0 | Low-quality    | Genome-fragment | NA | 1.88  |
| S1-final-viral-combined_k141_299723  | [full]   | 2167  | No | NA | 0  | 0 | Not-determined | Genome-fragment | NA | 0     |
| S1-final-viral-combined_k141_167051  | [full]   | 5315  | No | NA | 0  | 3 | Not-determined | Genome-fragment | NA | 0     |
| S1-final-viral-combined_k141_3323    | [full]   | 2239  | No | NA | 0  | 1 | Not-determined | Genome-fragment | NA | 0     |
| S1-final-viral-combined_k141_200684  | [full]   | 3186  | No | NA | 0  | 1 | Not-determined | Genome-fragment | NA | 0     |
| S1-final-viral-combined_k141_118476  | [full]   | 1283  | No | NA | 0  | 1 | Not-determined | Genome-fragment | NA | 0     |
| S1-final-viral-combined_k141_381464  | [full]   | 6346  | No | NA | 0  | 2 | Not-determined | Genome-fragment | NA | 0     |
| S1-final-viral-combined_k141_200690  | [full]   | 5018  | No | NA | 0  | 2 | Not-determined | Genome-fragment | NA | 0     |
| S9_k141_97343                        |          | 1286  | No | NA | 0  | 0 | Low-quality    | Genome-fragment | NA | 2.74  |
| S1-final-viral-combined_k141_19565   | [full]   | 2051  | No | NA | 0  | 0 | Not-determined | Genome-fragment | NA | 0     |
| S1-final-viral-combined_k141_36139   | [full]   | 3978  | No | NA | 0  | 3 | Not-determined | Genome-fragment | NA | 0     |
| S1-final-viral-combined_k141_283072  | [full]   | 1286  | No | NA | 0  | 0 | Not-determined | Genome-fragment | NA | 0     |
| S11-final-viral-combined_k141_201636 | [full]   | 3686  | No | NA | 0  | 0 | Low-quality    | Genome-fragment | NA | 2.47  |
| S1-final-viral-combined_k141_19573   | [full]   | 3658  | No | NA | 0  | 0 | Not-determined | Genome-fragment | NA | 0     |
| S1-final-viral-combined_k141_331972  | [full]   | 3953  | No | NA | 0  | 1 | Not-determined | Genome-fragment | NA | 0     |
| S11-final-viral-combined_k141_135181 | [full]   | 1286  | No | NA | 0  | 1 | Low-quality    | Genome-fragment | NA | 3.01  |
| S1-final-viral-combined_k141_318944  | [full]   | 1286  | No | NA | 0  | 1 | Low-quality    | Genome-fragment | NA | 1.86  |
| S5-final-viral-combined_k141_71287   | [full]   | 1286  | No | NA | 0  | 1 | Low-quality    | Genome-fragment | NA | 0.57  |
| S1-final-viral-combined_k141_217500  | [full]   | 2633  | No | NA | 0  | 2 | Not-determined | Genome-fragment | NA | 0     |
| S1-final-viral-combined_k141_331983  | [full]   | 4009  | No | NA | 0  | 4 | Not-determined | Genome-fragment | NA | 0     |
| S5-final-viral-combined_k141_87759   | [full]   | 1286  | No | NA | 3  | 0 | Low-quality    | Genome-fragment | NA | 2.89  |
| S1-final-viral-combined_k141_184559  | [full]   | 8417  | No | NA | 0  | 5 | Not-determined | Genome-fragment | NA | 0     |
| S5-final-viral-combined_k141_184548  | [full]   | 1286  | No | NA | 0  | 1 | Low-quality    | Genome-fragment | NA | 0.88  |
| S1-final-viral-combined_k141_167127  | [full]   | 1317  | No | NA | 0  | 2 | Not-determined | Genome-fragment | NA | 0     |
| S1-final-viral-combined_k141_200726  | [full]   | 7071  | No | NA | 0  | 5 | Not-determined | Genome-fragment | NA | 0     |
| S7-final-viral-combined_k141_1273    | [full]   | 1286  | No | NA | 0  | 1 | Low-quality    | Genome-fragment | NA | 0.84  |
| S7-final-viral-combined_k141_29172   | [full]   | 1286  | No | NA | 0  | 2 | Low-quality    | Genome-fragment | NA | 1.75  |
| S17-final-viral-combined_k141_217566 | [full]   | 1286  | No | NA | 0  | 2 | Low-quality    | Genome-fragment | NA | 0.41  |
| S1-final-viral-combined_k141_184595  | [full]   | 1751  | No | NA | 0  | 0 | Not-determined | Genome-fragment | NA | 0     |
| S1-final-viral-combined_k141_349004  | [full]   | 9315  | No | NA | 0  | 3 | Not-determined | Genome-fragment | NA | 0     |
| S1-final-viral-combined_k141_3375    | [full]   | 2695  | No | NA | 0  | 1 | Not-determined | Genome-fragment | NA | 0     |
| S1-final-viral-combined_k141_365357  | [full]   | 1089  | No | NA | 0  | 0 | Not-determined | Genome-fragment | NA | 0     |
| S1-final-viral-combined_k141_250283  | [full]   | 7171  | No | NA | 0  | 1 | Not-determined | Genome-fragment | NA | 0     |
| S12-final-viral-combined_k141_274610 | [full]   | 1286  | No | NA | 0  | 1 | Low-quality    | Genome-fragment | NA | 2.13  |
| S1-final-viral-combined_k141_281525  | [full]   | 1029  | No | NA | 0  | 0 | Not-determined | Genome-fragment | NA | 0     |
| S12-final-viral-combined_k141_293840 | [full]   | 1286  | No | NA | 0  | 0 | Low-quality    | Genome-fragment | NA | 3.07  |
| S12-final-viral-combined_k141_110611 | [H2gene] | 1286  | No | NA | 1  | 0 | Low-quality    | Genome-fragment | NA | 2.83  |
| S1-final-viral-combined_k141_101528  | [full]   | 5060  | No | NA | 0  | 0 | Not-determined | Genome-fragment | NA | 0     |
| S1-final-viral-combined_k141_184606  | [full]   | 4984  | No | NA | 0  | 2 | Not-determined | Genome-fragment | NA | 0     |
| S2-final-viral-combined_k141_230575  | [full]   | 1286  | No | NA | 1  | 0 | Low-quality    | Genome-fragment | NA | 2.88  |
| S1-final-viral-combined_k141_332037  | [full]   | 1838  | No | NA | 0  | 0 | Not-determined | Genome-fragment | NA | 0     |
| S1-final-viral-combined_k141_216024  | [full]   | 2394  | No | NA | 0  | 1 | Not-determined | Genome-fragment | NA | 0     |
| S1-final-viral-combined_k141_167167  | [full]   | 4995  | No | NA | 0  | 0 | Not-determined | Genome-fragment | NA | 0     |
| S1-final-viral-combined_k141_233529  | [full]   | 1082  | No | NA | 0  | 0 | Not-determined | Genome-fragment | NA | 0     |
| S2-final-viral-combined_k141_90248   | [full]   | 1286  | No | NA | 1  | 0 | Low-quality    | Genome-fragment | NA | 2.84  |
| S4-final-viral-combined_k141_166574  | [full]   | 1286  | No | NA | 0  | 1 | Low-quality    | Genome-fragment | NA | 2.14  |
| S1-final-viral-combined_k141_184637  | [full]   | 1533  | No | NA | 0  | 0 | Not-determined | Genome-fragment | NA | 0     |
| S1-final-viral-combined_k141_381578  | [full]   | 5871  | No | NA | 0  | 3 | Not-determined | Genome-fragment | NA | 0     |
| S1-final-viral-combined_k141_216076  | [full]   | 2664  | No | NA | 0  | 1 | Not-determined | Genome-fragment | NA | 0     |
| S1-final-viral-combined_k141_101601  | [full]   | 3689  | No | NA | 0  | 3 | Not-determined | Genome-fragment | NA | 0     |
| S1-final-viral-combined_k141_135415  | [full]   | 3368  | No | NA | 0  | 1 | Not-determined | Genome-fragment | NA | 0     |
| S1-final-viral-combined_k141_184685  | [full]   | 1359  | No | NA | 0  | 0 | Not-determined | Genome-fragment | NA | 0     |
| S1-final-viral-combined_k141_68539   | [full]   | 2912  | No | NA | 0  | 1 | Not-determined | Genome-fragment | NA | 0     |
| S1-final-viral-combined_k141_266136  | [full]   | 1057  | No | NA | 0  | 1 | Not-determined | Genome-fragment | NA |       |



|                                      |          |       |    |    |    |    |                |                 |    |       |
|--------------------------------------|----------|-------|----|----|----|----|----------------|-----------------|----|-------|
| S1-final-viral-combined_k141_19846   | [full]   | 1540  | No | NA | 0  | 0  | Not-determined | Genome-fragment | NA | 0     |
| S1-final-viral-combined_k141_19850   | [full]   | 1845  | No | NA | 0  | 1  | Not-determined | Genome-fragment | NA | 0     |
| S1-final-viral-combined_k141_250537  | [full]   | 1509  | No | NA | 0  | 0  | Not-determined | Genome-fragment | NA | 0     |
| S12-final-viral-combined_k141_360730 | [full]   | 1288  | No | NA | 0  | 0  | Low-quality    | Genome-fragment | NA | 2     |
| S12_k141_292167                      |          | 1288  | No | NA | 0  | 0  | Low-quality    | Genome-fragment | NA | 279   |
| S4-final-viral-combined_k141_40748   | [H2gene] | 1288  | No | NA | 0  | 0  | Low-quality    | Genome-fragment | NA | 1.59  |
| S1-final-viral-combined_k141_151589  | [full]   | 2845  | No | NA | 0  | 2  | Not-determined | Genome-fragment | NA | 0     |
| S1-final-viral-combined_k141_118763  | [full]   | 1787  | No | NA | 0  | 1  | Not-determined | Genome-fragment | NA | 0     |
| S4_k141_43729                        |          | 1288  | No | NA | 1  | 0  | Low-quality    | Genome-fragment | NA | 2.33  |
| S8-final-viral-combined_k141_228522  | [full]   | 1288  | No | NA | 0  | 0  | Low-quality    | Genome-fragment | NA | 1.03  |
| S1-final-viral-combined_k141_118766  | [full]   | 1036  | No | NA | 0  | 0  | Not-determined | Genome-fragment | NA | 0     |
| S1-final-viral-combined_k141_232236  | [full]   | 30000 | No | NA | 18 | 0  | Medium-quality | Genome-fragment | NA | 55.15 |
| S9-final-viral-combined_k141_66392   | [full]   | 1289  | No | NA | 0  | 0  | Low-quality    | Genome-fragment | NA | 3.29  |
| S1-final-viral-combined_k141_118771  | [full]   | 1154  | No | NA | 0  | 2  | Not-determined | Genome-fragment | NA | 0     |
| S1-final-viral-combined_k141_151000  | [full]   | 1611  | No | NA | 0  | 0  | Not-determined | Genome-fragment | NA | 0     |
| S1-final-viral-combined_k141_332245  | [full]   | 1558  | No | NA | 0  | 1  | Not-determined | Genome-fragment | NA | 0     |
| S11-final-viral-combined_k141_78557  | [full]   | 1289  | No | NA | 0  | 0  | Low-quality    | Genome-fragment | NA | 1.27  |
| S11_k141_68054                       |          | 1289  | No | NA | 0  | 0  | Low-quality    | Genome-fragment | NA | 1.32  |
| S1-final-viral-combined_k141_151624  | [full]   | 1616  | No | NA | 0  | 4  | Not-determined | Genome-fragment | NA | 0     |
| S1-final-viral-combined_k141_52510   | [full]   | 1697  | No | NA | 0  | 1  | Not-determined | Genome-fragment | NA | 0     |
| S5-final-viral-combined_k141_190993  | [full]   | 1289  | No | NA | 0  | 0  | Low-quality    | Genome-fragment | NA | 3.08  |
| S1-final-viral-combined_k141_283401  | [full]   | 1409  | No | NA | 0  | 0  | Not-determined | Genome-fragment | NA | 0     |
| S5-final-viral-combined_k141_23745   | [full]   | 1289  | No | NA | 1  | 0  | Low-quality    | Genome-fragment | NA | 1.42  |
| S1-final-viral-combined_k141_381793  | [full]   | 1424  | No | NA | 0  | 0  | Not-determined | Genome-fragment | NA | 0     |
| S1-final-viral-combined_k141_52552   | [full]   | 1134  | No | NA | 0  | 0  | Not-determined | Genome-fragment | NA | 0     |
| S5_k141_74301                        |          | 1289  | No | NA | 0  | 0  | Low-quality    | Genome-fragment | NA | 2.58  |
| S1-final-viral-combined_k141_250666  | [full]   | 1888  | No | NA | 0  | 0  | Not-determined | Genome-fragment | NA | 0     |
| S7_k141_124388                       |          | 1289  | No | NA | 0  | 0  | Low-quality    | Genome-fragment | NA | 2.61  |
| S1-final-viral-combined_k141_19954   | [full]   | 2345  | No | NA | 0  | 1  | Not-determined | Genome-fragment | NA | 0     |
| S1-final-viral-combined_k141_365658  | [full]   | 1132  | No | NA | 0  | 2  | Not-determined | Genome-fragment | NA | 0     |
| S1-final-viral-combined_k141_365659  | [full]   | 1509  | No | NA | 0  | 2  | Not-determined | Genome-fragment | NA | 0     |
| S1-final-viral-combined_k141_381811  | [full]   | 2194  | No | NA | 0  | 2  | Not-determined | Genome-fragment | NA | 3.33  |
| S1-final-viral-combined_k141_151691  | [full]   | 1324  | No | NA | 0  | 0  | Not-determined | Genome-fragment | NA | 0     |
| S17-final-viral-combined_k141_64203  | [full]   | 1289  | No | NA | 2  | 0  | Low-quality    | Genome-fragment | NA | 3.3   |
| S12_k141_313414                      |          | 1289  | No | NA | 0  | 0  | Low-quality    | Genome-fragment | NA | 0.77  |
| S1-final-viral-combined_k141_252502  | [full]   | 2614  | No | NA | 0  | 2  | Not-determined | Genome-fragment | NA | 1.42  |
| S2-final-viral-combined_k141_53361   | [H2gene] | 1289  | No | NA | 0  | 0  | Low-quality    | Genome-fragment | NA | 3.26  |
| S4-final-viral-combined_k141_97248   | [full]   | 1289  | No | NA | 0  | 0  | Low-quality    | Genome-fragment | NA | 0.79  |
| S1-final-viral-combined_k141_184924  | [full]   | 2907  | No | NA | 0  | 0  | Not-determined | Genome-fragment | NA | 0     |
| S1-final-viral-combined_k141_3702    | [full]   | 2646  | No | NA | 0  | 1  | Not-determined | Genome-fragment | NA | 0     |
| S1-final-viral-combined_k141_250698  | [full]   | 1687  | No | NA | 0  | 2  | Not-determined | Genome-fragment | NA | 0     |
| S1-final-viral-combined_k141_250700  | [full]   | 1273  | No | NA | 0  | 2  | Not-determined | Genome-fragment | NA | 0     |
| S1-final-viral-combined_k141_68649   | [full]   | 7904  | No | NA | 0  | 3  | Not-determined | Genome-fragment | NA | 0     |
| S8_k141_255566                       |          | 1289  | No | NA | 0  | 1  | Low-quality    | Genome-fragment | NA | 2.03  |
| S1-final-viral-combined_k141_316446  | [full]   | 6007  | No | NA | 0  | 4  | Not-determined | Genome-fragment | NA | 0     |
| S8_k141_101791                       |          | 1289  | No | NA | 1  | 0  | Low-quality    | Genome-fragment | NA | 1.72  |
| S9-final-viral-combined_k141_85456   | [full]   | 1290  | No | NA | 1  | 0  | Low-quality    | Genome-fragment | NA | 2.44  |
| S1-final-viral-combined_k141_283463  | [full]   | 1811  | No | NA | 0  | 1  | Not-determined | Genome-fragment | NA | 0     |
| S11-final-viral-combined_k141_76403  | [full]   | 1290  | No | NA | 0  | 0  | Low-quality    | Genome-fragment | NA | 1.44  |
| S1-final-viral-combined_k141_135673  | [full]   | 4556  | No | NA | 0  | 3  | Not-determined | Genome-fragment | NA | 0     |
| S1-final-viral-combined_k141_300212  | [full]   | 5209  | No | NA | 0  | 0  | Not-determined | Genome-fragment | NA | 0     |
| S1-final-viral-combined_k141_233931  | [full]   | 1148  | No | NA | 0  | 0  | Not-determined | Genome-fragment | NA | 0     |
| S11-final-viral-combined_k141_189068 | [H2gene] | 1290  | No | NA | 1  | 0  | Low-quality    | Genome-fragment | NA | 2.95  |
| S11_k141_174589                      |          | 1290  | No | NA | 0  | 2  | Low-quality    | Genome-fragment | NA | 0.21  |
| S1-final-viral-combined_k141_239594  | [full]   | 2405  | No | NA | 1  | 1  | Not-determined | Genome-fragment | NA | 0     |
| S1-final-viral-combined_k141_184976  | [full]   | 3945  | No | NA | 0  | 2  | Not-determined | Genome-fragment | NA | 0     |
| S1-final-viral-combined_k141_151708  | [full]   | 13557 | No | NA | 2  | 1  | Medium-quality | Genome-fragment | NA | 87.49 |
| S1-final-viral-combined_k141_33837   | [full]   | 1290  | No | NA | 0  | 0  | Low-quality    | Genome-fragment | NA | 0.82  |
| S1-final-viral-combined_k141_168671  | [full]   | 1290  | No | NA | 0  | 1  | Low-quality    | Genome-fragment | NA | 3.33  |
| S7-final-viral-combined_k141_78892   | [full]   | 1290  | No | NA | 0  | 0  | Low-quality    | Genome-fragment | NA | 2.14  |
| S1-final-viral-combined_k141_233991  | [full]   | 5685  | No | NA | 0  | 4  | Not-determined | Genome-fragment | NA | 0     |
| S12-final-viral-combined_k141_117121 | [full]   | 1290  | No | NA | 0  | 0  | Low-quality    | Genome-fragment | NA | 2.59  |
| S1-final-viral-combined_k141_283520  | [full]   | 2752  | No | NA | 0  | 1  | Not-determined | Genome-fragment | NA | 0     |
| S1-final-viral-combined_k141_26243   | [full]   | 23316 | No | NA | 8  | 0  | Medium-quality | Genome-fragment | NA | 56.07 |
| S4_k141_19346                        |          | 1290  | No | NA | 0  | 1  | Low-quality    | Genome-fragment | NA | 1.42  |
| S6-final-viral-combined_k141_48187   | [full]   | 1290  | No | NA | 0  | 0  | Low-quality    | Genome-fragment | NA | 1.8   |
| S1-final-viral-combined_k141_349308  | [full]   | 2168  | No | NA | 0  | 1  | Not-determined | Genome-fragment | NA | 0     |
| S1-final-viral-combined_k141_217640  | [full]   | 2069  | No | NA | 0  | 1  | Not-determined | Genome-fragment | NA | 0     |
| S1-final-viral-combined_k141_101851  | [full]   | 3580  | No | NA | 0  | 2  | Not-determined | Genome-fragment | NA | 0     |
| S8-final-viral-combined_k141_12110   | [H2gene] | 1290  | No | NA | 1  | 0  | Low-quality    | Genome-fragment | NA | 3.42  |
| S9-final-viral-combined_k141_62851   | [H2gene] | 1291  | No | NA | 2  | 0  | Low-quality    | Genome-fragment | NA | 3.14  |
| S1-final-viral-combined_k141_101850  | [full]   | 2110  | No | NA | 0  | 2  | Not-determined | Genome-fragment | NA | 0     |
| S1-final-viral-combined_k141_118921  | [full]   | 1021  | No | NA | 0  | 0  | Not-determined | Genome-fragment | NA | 0     |
| S1-final-viral-combined_k141_118928  | [full]   | 3159  | No | NA | 0  | 0  | Not-determined | Genome-fragment | NA | 0     |
| S1-final-viral-combined_k141_283600  | [full]   | 14499 | No | NA | 12 | 1  | Not-determined | Genome-fragment | NA | 0     |
| S1-final-viral-combined_k141_332485  | [full]   | 2344  | No | NA | 0  | 0  | Not-determined | Genome-fragment | NA | 0     |
| S1-final-viral-combined_k141_266623  | [full]   | 1848  | No | NA | 0  | 2  | Not-determined | Genome-fragment | NA | 0     |
| S1-final-viral-combined_k141_20170   | [full]   | 3655  | No | NA | 0  | 4  | Not-determined | Genome-fragment | NA | 0     |
| S1-final-viral-combined_k141_5270    | [full]   | 3316  | No | NA | 0  | 3  | Not-determined | Genome-fragment | NA | 0     |
| S1-final-viral-combined_k141_363910  | [full]   | 1291  | No | NA | 0  | 0  | Low-quality    | Genome-fragment | NA | 0.51  |
| S1-final-viral-combined_k141_152645  | [full]   | 1291  | No | NA | 0  | 0  | Low-quality    | Genome-fragment | NA | 0.89  |
| S1-final-viral-combined_k141_127778  | [full]   | 1291  | No | NA | 0  | 0  | Low-quality    | Genome-fragment | NA | 2.14  |
| S1-final-viral-combined_k141_266673  | [full]   | 12403 | No | NA | 0  | 3  | Not-determined | Genome-fragment | NA | 0     |
| S1-final-viral-combined_k141_167554  | [full]   | 7832  | No | NA | 0  | 6  | Not-determined | Genome-fragment | NA | 0     |
| S1-final-viral-combined_k141_201201  | [full]   | 4084  | No | NA | 0  | 0  | Not-determined | Genome-fragment | NA | 0     |
| S1-final-viral-combined_k141_118971  | [full]   | 1803  | No | NA | 0  | 2  | Not-determined | Genome-fragment | NA | 0     |
| S1-final-viral-combined_k141_52708   | [full]   | 51903 | No | NA | 3  | 34 | High-quality   | Genome-fragment | NA | 100   |
| S1-final-viral-combined_k141_217721  | [full]   | 3624  | No | NA | 0  | 2  | Not-determined | Genome-fragment | NA | 0     |
| S1-final-viral-combined_k141_185075  | [full]   | 3523  | No | NA | 0  | 0  | Not-determined | Genome-fragment | NA | 0     |
| S1-final-viral-combined_k141_52728   | [full]   | 2957  | No | NA | 0  | 1  | Not-determined | Genome-fragment | NA | 0     |
| S9-final-viral-combined_k141_60788   | [full]   | 1291  | No | NA | 0  | 0  | Low-quality    | Genome-fragment | NA | 0.97  |
| S1-final-viral-combined_k141_250889  | [full]   | 1017  | No | NA | 0  | 0  | Not-determined | Genome-fragment | NA | 0     |
| S1-final-viral-combined_k141_167587  | [full]   | 3081  | No | NA | 0  | 1  | Not-determined | Genome-fragment | NA | 0     |
| S1-final-viral-combined_k141_234102  | [full]   | 1077  | No | NA | 0  | 1  | Not-determined | Genome-fragment | NA | 0     |
| S7-final-viral-combined_k141_18808   | [H2gene] | 1291  | No | NA | 0  | 0  | Low-quality    | Genome-fragment | NA | 3.36  |
| S1-final-viral-combined_k141_201261  | [full]   | 2229  | No | NA | 0  | 3  | Not-determined | Genome-fragment | NA | 0     |
| S1-final-viral-combined_k141_266706  | [full]   | 1698  | No | NA | 0  | 2  | Not-determined | Genome-fragment | NA | 0     |
| S17-final-viral-combined_k141_266700 | [full]   | 1291  | No | NA | 0  | 0  | Low-quality    | Genome-fragment | NA | 2.08  |
| S1-final-viral-combined_k141_266731  | [full]   | 3347  | No | NA | 0  | 1  | Not-determined | Genome-fragment | NA | 0     |
| S17_k141_177889                      |          | 1291  | No | NA | 0  | 0  | Low-quality    | Genome-fragment | NA | 2.5   |
| S1-final-viral-combined_k141_382081  | [full]   | 3345  | No | NA | 0  | 3  | Not-determined | Genome-fragment | NA | 0.13  |
| S17_k141_253373                      |          | 1291  | No | NA | 0  | 1  | Low-quality    | Genome-fragment | NA | 0.25  |
| S4-final-viral-combined_k141_21661   | [full]   | 1291  | No | NA | 0  | 0  | Low-quality    | Genome-fragment | NA | 2.61  |
| S9-final-viral-combined_k141_34456   | [full]   | 1292  | No | NA | 1  | 0  | Low-quality    | Genome-fragment | NA | 3.08  |
| S11-final-viral-combined_k141_130518 | [full]   | 1292  | No | NA | 0  | 0  | Low-quality    | Genome-fragment | NA | 3.55  |
| S1-final-viral-combined_k141_266749  | [full]   | 2576  | No | NA | 0  | 2  | Not-determined | Genome-fragment | NA | 0     |
| S11-final-viral-combined_k141_75755  | [full]   | 1292  | No | NA | 0  | 0  | Low-quality    | Genome-fragment | NA | 2.82  |
| S1-final-viral-combined_k141_300462  | [full]   | 1427  | No | NA | 0  | 1  | Not-determined | Genome-fragment | NA | 0     |
| S1-final-viral-combined_k141_5287    | [full]   | 1182  | No | NA | 0  | 0  | Not-determined | Genome-fragment | NA | 0     |
| S1-final-viral-combined_k141_332633  | [full]   | 2498  | No | NA | 0  | 1  | Not-determined | Genome-fragment | NA | 2.88  |
| S11-final-viral-combined_k141_261318 | [full]   | 1292  | No | NA | 1  | 0  | Low-quality    | Genome-fragment | NA | 0     |
| S1-final-viral-combined_k141_250985  | [full]   | 2010  | No | NA | 0  | 1  | Not-determined | Genome-fragment | NA | 0     |
| S11_k141_199458                      |          | 1292  | No | NA | 0  | 1  | Low-quality    | Genome-fragment | NA | 0.29  |
| S1-final-viral-combined_k141_316835  | [full]   | 2680  | No | NA | 0  | 2  | Not-determined | Genome-fragment | NA | 0     |
| S1-final-viral-combined_k141_216836  | [full]   | 2063  | No | NA | 0  | 1  | Not-determined | Genome-fragment | NA | 0     |
| S1-final-viral-combined_k141_382136  | [full]   | 4480  | No | NA | 0  | 2  | Not-determined | Genome-fragment | NA | 0     |
| S1-final-viral-combined_k141_102063  | [full]   | 2332  | No | NA | 0  | 2  | Not-determined | Genome-fragment | NA | 0     |
| S1-final-viral-combined_k141_297503  | [full]   | 1292  | No | NA | 0  | 0  | Low-quality    | Genome-fragment | NA | 1.88  |
| S1-final-viral-combined_k141_167658  | [full]   | 1077  | No | NA | 0  | 0  | Not-determined | Genome-fragment | NA | 0     |
| S1_k141_115751                       |          | 1292  | No | NA | 0  | 1  | Low-quality    | Genome-fragment | NA | 2.72  |
| S1-final-viral-combined_k141_349500  | [full]   | 11522 | No | NA | 0  | 0  | Not-determined | Genome-fragment | NA | 3.19  |
| S5_k141_81734                        |          | 1292  | No | NA | 0  | 0  | Low-quality    | Genome-fragment | NA | 0     |
| S1-final-viral-combined_k141_283694  | [full]   | 1836  | No | NA | 0  | 1  | Not-determined | Genome-fragment | NA | 0     |
| S7-final-viral-combined_k141_130918  | [full]   | 1292  | No | NA | 0  | 1  | Low-quality    | Genome-fragment | NA | 2.89  |
| S7_k141_115274                       |          | 1292  | No | NA | 0  | 0  | Low-quality    | Genome-fragment | NA | 1.57  |
| S1-final-viral-combined_k141_300514  | [full]   | 1042  | No | NA | 0  | 0  | Not-determined | Genome-fragment | NA | 0     |
| S1-final-viral-combined_k141_85909   | [full]   | 5249  | No | NA | 0  | 3  | Not-determined | Genome-fragment | NA | 0     |
| S1-final-viral-combined_k141_85916   | [full]   | 1918  | No | NA | 0  | 1  | Not-determined | Genome-fragment | NA | 0     |
| S12-final-viral-combined_k141_91899  | [full]   | 1292  | No | NA | 0  | 1  | Low-quality    | Genome-fragment | NA | 1.52  |
| S1-final-viral-combined_k141_20231   | [full]   | 1920  | No | NA | 0  | 0  | Not-determined | Genome-fragment | NA | 0     |
| S1-final-viral-combined_k141_167648  |          |       |    |    |    |    |                |                 |    |       |



|                                      |          |       |     |       |    |    |                |                 |      |       |
|--------------------------------------|----------|-------|-----|-------|----|----|----------------|-----------------|------|-------|
| S11-final-viral-combined_k141_138238 | [full]   | 1294  | No  | NA    | 0  | 1  | Low-quality    | Genome-fragment | 1.94 | 0     |
| S1-final-viral-combined_k141_119122  | [full]   | 13601 | No  | NA    | 0  | 1  | Not-determined | Genome-fragment | NA   | 0     |
| S1-final-viral-combined_k141_36707   | [full]   | 6204  | No  | NA    | 0  | 0  | Not-determined | Genome-fragment | NA   | 0     |
| S1-final-viral-combined_k141_362288  | [full]   | 1294  | No  | NA    | 2  | 0  | Low-quality    | Genome-fragment | 3.55 | 0     |
| S1-final-viral-combined_k141_349701  | [full]   | 1041  | No  | NA    | 0  | 0  | Not-determined | Genome-fragment | NA   | 0     |
| S1-final-viral-combined_k141_171981  | [full]   | 2649  | No  | NA    | 0  | 0  | Not-determined | Genome-fragment | NA   | 0     |
| S1-final-viral-combined_k141_332863  | [full]   | 3847  | No  | NA    | 0  | 0  | Not-determined | Genome-fragment | NA   | 0     |
| S1-final-viral-combined_k141_294232  | [full]   | 1294  | No  | NA    | 0  | 0  | Low-quality    | Genome-fragment | 3.18 | 0     |
| S1-final-viral-combined_k141_185476  | [full]   | 2040  | No  | NA    | 0  | 0  | Not-determined | Genome-fragment | NA   | 0     |
| S1_k141_394414                       |          | 1294  | No  | NA    | 0  | 2  | Low-quality    | Genome-fragment | 1.91 | 0     |
| S1-final-viral-combined_k141_365922  | [full]   | 4433  | No  | NA    | 0  | 3  | Not-determined | Genome-fragment | NA   | 0     |
| S1-final-viral-combined_k141_349731  | [full]   | 4712  | No  | NA    | 0  | 2  | Not-determined | Genome-fragment | NA   | 0     |
| S1-final-viral-combined_k141_234464  | [full]   | 3147  | No  | NA    | 0  | 3  | Not-determined | Genome-fragment | NA   | 0     |
| S1-final-viral-combined_k141_68998   | [full]   | 56973 | Yes | 55700 | 22 | 2  | High-quality   | High-quality    | 100  | 2.23  |
| S7-final-viral-combined_k141_72651   | [H2gene] | 1294  | No  | NA    | 1  | 0  | Low-quality    | Genome-fragment | 3.17 | 0     |
| S1-final-viral-combined_k141_217999  | [full]   | 3033  | No  | NA    | 0  | 2  | Not-determined | Genome-fragment | NA   | 0     |
| S2-final-viral-combined_k141_177997  | [full]   | 1294  | No  | NA    | 0  | 0  | Low-quality    | Genome-fragment | 3.13 | 0     |
| S11-final-viral-combined_k141_96575  | [full]   | 1295  | No  | NA    | 0  | 0  | Low-quality    | Genome-fragment | 1.53 | 0     |
| S11_k141_58805                       |          | 1295  | No  | NA    | 0  | 1  | Low-quality    | Genome-fragment | 0.95 | 0     |
| S1_k141_353480                       |          | 1295  | No  | NA    | 0  | 0  | Low-quality    | Genome-fragment | 0.99 | 0     |
| S1-final-viral-combined_k141_251366  | [full]   | 6845  | No  | NA    | 0  | 4  | Not-determined | Genome-fragment | NA   | 0     |
| S1-final-viral-combined_k141_367621  | [full]   | 1412  | No  | NA    | 0  | 0  | Not-determined | Genome-fragment | NA   | 0     |
| S1-final-viral-combined_k141_317138  | [full]   | 19449 | No  | NA    | 0  | 12 | Not-determined | Genome-fragment | NA   | 0     |
| S1-final-viral-combined_k141_167848  | [full]   | 2286  | No  | NA    | 0  | 2  | Not-determined | Genome-fragment | NA   | 0     |
| S1-final-viral-combined_k141_152133  | [full]   | 1595  | No  | NA    | 0  | 2  | Not-determined | Genome-fragment | NA   | 0     |
| S1-final-viral-combined_k141_148920  | [full]   | 3028  | No  | NA    | 0  | 3  | Not-determined | Genome-fragment | NA   | 0     |
| S1-final-viral-combined_k141_201696  | [full]   | 2966  | No  | NA    | 0  | 0  | Not-determined | Genome-fragment | NA   | 0     |
| S1-final-viral-combined_k141_69079   | [full]   | 1407  | No  | NA    | 0  | 1  | Not-determined | Genome-fragment | NA   | 0     |
| S1-final-viral-combined_k141_251178  | [full]   | 1213  | No  | NA    | 0  | 0  | Not-determined | Genome-fragment | NA   | 0     |
| S1_k141_338639                       |          | 1295  | No  | NA    | 0  | 1  | Low-quality    | Genome-fragment | 0.72 | 0     |
| S3-final-viral-combined_k141_133260  | [full]   | 1295  | No  | NA    | 1  | 0  | Low-quality    | Genome-fragment | 2.21 | 0     |
| S1-final-viral-combined_k141_251281  | [full]   | 3571  | No  | NA    | 0  | 3  | Not-determined | Genome-fragment | NA   | 0     |
| S1-final-viral-combined_k141_283999  | [full]   | 1838  | No  | NA    | 0  | 1  | Not-determined | Genome-fragment | NA   | 0     |
| S1-final-viral-combined_k141_349869  | [full]   | 2049  | No  | NA    | 0  | 1  | Not-determined | Genome-fragment | NA   | 0     |
| S1-final-viral-combined_k141_300776  | [full]   | 2146  | No  | NA    | 0  | 0  | Not-determined | Genome-fragment | NA   | 0     |
| S1-final-viral-combined_k141_110719  | [full]   | 1295  | No  | NA    | 0  | 1  | Low-quality    | Genome-fragment | 1.69 | 0     |
| S1-final-viral-combined_k141_267198  | [full]   | 4386  | No  | NA    | 0  | 2  | Not-determined | Genome-fragment | NA   | 0     |
| S7-final-viral-combined_k141_120959  | [H2gene] | 1295  | No  | NA    | 0  | 2  | Low-quality    | Genome-fragment | 0.82 | 0     |
| S12-final-viral-combined_k141_372250 | [full]   | 1295  | Yes | 504   | 2  | 1  | Low-quality    | Genome-fragment | 0.62 | 61.08 |
| S1-final-viral-combined_k141_4054    | [full]   | 6441  | No  | NA    | 0  | 1  | Not-determined | Genome-fragment | NA   | 0     |
| S1-final-viral-combined_k141_148988  | [full]   | 2505  | No  | NA    | 0  | 2  | Not-determined | Genome-fragment | NA   | 0     |
| S12-final-viral-combined_k141_92224  | [full]   | 1295  | No  | NA    | 0  | 0  | Low-quality    | Genome-fragment | 3.9  | 0     |
| S1-final-viral-combined_k141_167919  | [full]   | 1848  | No  | NA    | 0  | 1  | Not-determined | Genome-fragment | NA   | 0     |
| S1-final-viral-combined_k141_348521  | [full]   | 3191  | No  | NA    | 0  | 2  | Not-determined | Genome-fragment | NA   | 0     |
| S1-final-viral-combined_k141_382180  | [full]   | 1780  | No  | NA    | 0  | 0  | Not-determined | Genome-fragment | NA   | 0     |
| S1-final-viral-combined_k141_201769  | [full]   | 2819  | No  | NA    | 0  | 2  | Not-determined | Genome-fragment | NA   | 0     |
| S12-final-viral-combined_k141_367716 | [full]   | 1295  | No  | NA    | 0  | 2  | Low-quality    | Genome-fragment | 0.64 | 0     |
| S1-final-viral-combined_k141_185613  | [full]   | 1174  | No  | NA    | 0  | 0  | Not-determined | Genome-fragment | NA   | 0     |
| S2-final-viral-combined_k141_16746   | [full]   | 1295  | No  | NA    | 1  | 0  | Low-quality    | Genome-fragment | 2.21 | 0     |
| S1-final-viral-combined_k141_300893  | [full]   | 5554  | No  | NA    | 0  | 0  | Not-determined | Genome-fragment | NA   | 0     |
| S1-final-viral-combined_k141_284081  | [full]   | 6142  | No  | NA    | 0  | 4  | Not-determined | Genome-fragment | NA   | 0     |
| S1-final-viral-combined_k141_152265  | [full]   | 1631  | No  | NA    | 0  | 0  | Not-determined | Genome-fragment | NA   | 0     |
| S1-final-viral-combined_k141_251587  | [full]   | 1388  | No  | NA    | 0  | 1  | Not-determined | Genome-fragment | NA   | 0     |
| S6-final-viral-combined_k141_59075   | [full]   | 1295  | No  | NA    | 1  | 0  | Low-quality    | Genome-fragment | 2.54 | 0     |
| S1-final-viral-combined_k141_366151  | [full]   | 1085  | No  | NA    | 0  | 1  | Not-determined | Genome-fragment | NA   | 0     |
| S6-final-viral-combined_k141_50310   | [full]   | 1295  | No  | NA    | 0  | 2  | Low-quality    | Genome-fragment | 0.65 | 0     |
| S11-final-viral-combined_k141_91228  | [full]   | 1296  | No  | NA    | 1  | 0  | Low-quality    | Genome-fragment | 3.7  | 0     |
| S1-final-viral-combined_k141_251599  | [full]   | 7549  | No  | NA    | 0  | 4  | Not-determined | Genome-fragment | NA   | 0     |
| S11-final-viral-combined_k141_68813  | [H2gene] | 1296  | No  | NA    | 1  | 0  | Low-quality    | Genome-fragment | 2.91 | 0     |
| S1-final-viral-combined_k141_317268  | [full]   | 2956  | No  | NA    | 0  | 2  | Not-determined | Genome-fragment | NA   | 0     |
| S1-final-viral-combined_k141_382442  | [full]   | 2054  | No  | NA    | 0  | 1  | Not-determined | Genome-fragment | NA   | 0     |
| S11_k141_218652                      |          | 1296  | No  | NA    | 0  | 0  | Low-quality    | Genome-fragment | 2.2  | 0     |
| S1-final-viral-combined_k141_331227  | [full]   | 1808  | No  | NA    | 0  | 2  | Not-determined | Genome-fragment | NA   | 0     |
| S3_k141_51247                        |          | 1296  | No  | NA    | 0  | 0  | Low-quality    | Genome-fragment | 2.99 | 0     |
| S1-final-viral-combined_k141_284134  | [full]   | 1722  | No  | NA    | 0  | 0  | Not-determined | Genome-fragment | NA   | 0     |
| S1-final-viral-combined_k141_350110  | [full]   | 1209  | No  | NA    | 0  | 0  | Not-determined | Genome-fragment | NA   | 0     |
| S1-final-viral-combined_k141_333140  | [full]   | 4169  | No  | NA    | 0  | 2  | Not-determined | Genome-fragment | NA   | 0     |
| S1-final-viral-combined_k141_119091  | [full]   | 4446  | No  | NA    | 0  | 0  | Not-determined | Genome-fragment | NA   | 0     |
| S17-final-viral-combined_k141_100062 | [full]   | 1296  | No  | NA    | 0  | 0  | Low-quality    | Genome-fragment | 0.63 | 0     |
| S1-final-viral-combined_k141_350141  | [full]   | 2972  | No  | NA    | 0  | 1  | Not-determined | Genome-fragment | NA   | 0     |
| S17-final-viral-combined_k141_101661 | [full]   | 1296  | No  | NA    | 0  | 0  | Low-quality    | Genome-fragment | 1.85 | 0     |
| S17-final-viral-combined_k141_372669 | [full]   | 1296  | No  | NA    | 0  | 2  | Low-quality    | Genome-fragment | 0.61 | 0     |
| S1-final-viral-combined_k141_102476  | [full]   | 1613  | No  | NA    | 0  | 0  | Not-determined | Genome-fragment | NA   | 0     |
| S1-final-viral-combined_k141_382571  | [full]   | 1815  | No  | NA    | 0  | 3  | Not-determined | Genome-fragment | NA   | 0     |
| S1-final-viral-combined_k141_185766  | [full]   | 1701  | No  | NA    | 0  | 1  | Not-determined | Genome-fragment | NA   | 0     |
| S12-final-viral-combined_k141_366846 | [full]   | 1296  | No  | NA    | 0  | 1  | Low-quality    | Genome-fragment | 0.66 | 0     |
| S2-final-viral-combined_k141_241957  | [full]   | 1296  | No  | NA    | 0  | 0  | Low-quality    | Genome-fragment | 1.63 | 0     |
| S1-final-viral-combined_k141_251641  | [full]   | 2813  | No  | NA    | 0  | 2  | Not-determined | Genome-fragment | NA   | 0     |
| S1-final-viral-combined_k141_152349  | [full]   | 1809  | No  | NA    | 0  | 1  | Not-determined | Genome-fragment | NA   | 0     |
| S1-final-viral-combined_k141_317361  | [full]   | 1597  | No  | NA    | 0  | 1  | Not-determined | Genome-fragment | NA   | 0     |
| S4_k141_23528                        |          | 1296  | No  | NA    | 0  | 0  | Low-quality    | Genome-fragment | 2.59 | 0     |
| S1-final-viral-combined_k141_284189  | [full]   | 4651  | No  | NA    | 0  | 0  | Not-determined | Genome-fragment | NA   | 0     |
| S1-final-viral-combined_k141_37083   | [full]   | 2826  | No  | NA    | 0  | 0  | Not-determined | Genome-fragment | NA   | 0     |
| S1-final-viral-combined_k141_152280  | [full]   | 6320  | No  | NA    | 0  | 1  | Not-determined | Genome-fragment | NA   | 0     |
| S8-final-viral-combined_k141_74832   | [full]   | 1296  | No  | NA    | 0  | 1  | Low-quality    | Genome-fragment | 0.85 | 0     |
| S1-final-viral-combined_k141_20801   | [full]   | 1892  | No  | NA    | 0  | 1  | Not-determined | Genome-fragment | NA   | 0     |
| S1-final-viral-combined_k141_22250   | [full]   | 1297  | No  | NA    | 0  | 0  | Low-quality    | Genome-fragment | 2.92 | 0     |
| S1-final-viral-combined_k141_382627  | [full]   | 1862  | No  | NA    | 0  | 0  | Not-determined | Genome-fragment | NA   | 0     |
| S1-final-viral-combined_k141_317591  | [full]   | 7534  | No  | NA    | 0  | 0  | Not-determined | Genome-fragment | NA   | 0     |
| S1_k141_233373                       |          | 1297  | No  | NA    | 0  | 0  | Low-quality    | Genome-fragment | 3.41 | 0     |
| S1-final-viral-combined_k141_102499  | [full]   | 2667  | No  | NA    | 0  | 3  | Not-determined | Genome-fragment | NA   | 0     |
| S3_k141_109237                       |          | 1297  | No  | NA    | 0  | 0  | Low-quality    | Genome-fragment | 3.09 | 0     |
| S7-final-viral-combined_k141_506     | [full]   | 1297  | No  | NA    | 0  | 0  | Low-quality    | Genome-fragment | 1.64 | 0     |
| S1-final-viral-combined_k141_284219  | [full]   | 3774  | No  | NA    | 0  | 1  | Not-determined | Genome-fragment | NA   | 0     |
| S1-final-viral-combined_k141_382586  | [full]   | 2080  | No  | NA    | 0  | 2  | Not-determined | Genome-fragment | NA   | 0     |
| S7-final-viral-combined_k141_64158   | [full]   | 1297  | No  | NA    | 0  | 0  | Low-quality    | Genome-fragment | 2.2  | 0     |
| S7_k141_204446                       |          | 1297  | No  | NA    | 0  | 0  | Low-quality    | Genome-fragment | 1.22 | 0     |
| S1-final-viral-combined_k141_152405  | [full]   | 1345  | No  | NA    | 0  | 2  | Not-determined | Genome-fragment | NA   | 0     |
| S1-final-viral-combined_k141_37145   | [full]   | 1967  | No  | NA    | 0  | 0  | Not-determined | Genome-fragment | NA   | 0     |
| S1-final-viral-combined_k141_119827  | [full]   | 6484  | No  | NA    | 0  | 4  | Not-determined | Genome-fragment | NA   | 0     |
| S17-final-viral-combined_k141_59498  | [full]   | 1297  | No  | NA    | 0  | 2  | Low-quality    | Genome-fragment | 1    | 0     |
| S17-final-viral-combined_k141_199368 | [full]   | 1297  | No  | NA    | 0  | 0  | Low-quality    | Genome-fragment | 3.24 | 0     |
| S4-final-viral-combined_k141_166683  | [full]   | 1297  | No  | NA    | 0  | 2  | Low-quality    | Genome-fragment | 2.39 | 0     |
| S1-final-viral-combined_k141_382618  | [full]   | 1159  | No  | NA    | 0  | 2  | Not-determined | Genome-fragment | NA   | 0     |
| S1-final-viral-combined_k141_53438   | [full]   | 1362  | No  | NA    | 0  | 3  | Not-determined | Genome-fragment | NA   | 0     |
| S1-final-viral-combined_k141_69226   | [full]   | 4163  | No  | NA    | 0  | 3  | Not-determined | Genome-fragment | NA   | 0     |
| S6-final-viral-combined_k141_100526  | [H2gene] | 1297  | No  | NA    | 2  | 0  | Low-quality    | Genome-fragment | 4.03 | 0     |
| S1-final-viral-combined_k141_69229   | [full]   | 1348  | No  | NA    | 0  | 0  | Not-determined | Genome-fragment | NA   | 0     |
| S1-final-viral-combined_k141_37155   | [full]   | 2040  | No  | NA    | 0  | 1  | Not-determined | Genome-fragment | NA   | 0     |
| S1-final-viral-combined_k141_202031  | [full]   | 2428  | No  | NA    | 0  | 3  | Not-determined | Genome-fragment | NA   | 0     |
| S6_k141_130921                       |          | 1297  | No  | NA    | 0  | 1  | Low-quality    | Genome-fragment | 0.77 | 0     |
| S1-final-viral-combined_k141_267514  | [full]   | 1609  | No  | NA    | 0  | 2  | Not-determined | Genome-fragment | NA   | 0     |
| S1-final-viral-combined_k141_53455   | [full]   | 2567  | No  | NA    | 0  | 0  | Not-determined | Genome-fragment | NA   | 0     |
| S1-final-viral-combined_k141_136479  | [full]   | 2497  | No  | NA    | 0  | 2  | Not-determined | Genome-fragment | NA   | 0     |
| S11-final-viral-combined_k141_108122 | [full]   | 1298  | No  | NA    | 0  | 0  | Low-quality    | Genome-fragment | 2.67 | 0     |
| S11_k141_240901                      |          | 1298  | No  | NA    | 0  | 0  | Low-quality    | Genome-fragment | 1.39 | 0     |
| S1-final-viral-combined_k141_202043  | [full]   | 6612  | No  | NA    | 0  | 2  | Not-determined | Genome-fragment | NA   | 0     |
| S1-final-viral-combined_k141_168253  | [full]   | 1466  | No  | NA    | 0  | 1  | Not-determined | Genome-fragment | NA   | 0     |
| S1-final-viral-combined_k141_138131  | [full]   | 1298  | No  | NA    | 1  | 0  | Low-quality    | Genome-fragment | 0.79 | 0     |
| S1-final-viral-combined_k141_69258   | [full]   | 2359  | No  | NA    | 0  | 2  | Not-determined | Genome-fragment | NA   | 0     |
| S1-final-viral-combined_k141_333281  | [full]   | 3042  | No  | NA    | 0  | 2  | Not-determined | Genome-fragment | NA   | 0     |
| S1-final-viral-combined_k141_69264   | [full]   | 2270  | No  | NA    | 0  | 1  | Not-determined | Genome-fragment | NA   | 0     |
| S1-final-viral-combined_k141_284284  | [full]   | 6439  | No  | NA    | 0  | 2  | Not-determined | Genome-fragment | NA   | 0     |
| S1-final-viral-combined_k141_119599  | [full]   | 1617  | No  | NA    | 0  | 1  | Not-determined | Genome-fragment | NA   | 0     |
| S5_k141_71222                        |          | 1298  | No  | NA    | 0  | 1  | Low-quality    | Genome-fragment | 2.84 | 0     |
| S7-final-viral-combined_k141_118310  | [full]   | 1298  | No  | NA    | 1  | 0  | Low-quality    | Genome-fragment | 3.32 | 0     |
| S1-final-viral-combined_k141_53493   | [full]   | 1764  | No  | NA    | 0  | 5  | Not-determined | Genome-fragment | NA   | 0     |
| S7-final-viral-combined_k141_97331   | [full]   | 1298  | No  | NA    | 1  | 0  | Low-quality    | Genome-fragment | 1.69 | 0     |
| S1-final-viral-combined_k141_86424   | [full]   | 3212  | No  | NA    | 0  | 2  | Not-determined | Genome-fragment | NA   | 0     |
| S1-final-viral-combined_k141_168280  | [full]   | 2887  | No  | NA    | 0  | 2  | Not-determined | Genome-fragment | NA   | 0     |
| S7-final-viral-combined_k141         |          |       |     |       |    |    |                |                 |      |       |



|                                      |         |       |      |    |   |    |                |                 |       |   |
|--------------------------------------|---------|-------|------|----|---|----|----------------|-----------------|-------|---|
| S8-final-viral-combined_k141_138770  | [H2gene | 1299  | No   | NA | 0 | 2  | Low-quality    | Genome-fragment | 1.85  | 0 |
| S9-final-viral-combined_k141_17179   | [full   | 1300  | No   | NA | 0 | 0  | Low-quality    | Genome-fragment | 3.49  | 0 |
| S11-final-viral-combined_k141_153243 | [full   | 1300  | No   | NA | 2 | 0  | Low-quality    | Genome-fragment | 1.03  | 0 |
| S11-final-viral-combined_k141_95483  | [full   | 1300  | No   | NA | 1 | 0  | Low-quality    | Genome-fragment | 1.54  | 0 |
| S11_k141_251661                      | [full   | 1300  | No   | NA | 2 | 0  | Low-quality    | Genome-fragment | 2.67  | 0 |
| S1-final-viral-combined_k141_238583  | [full   | 1300  | No   | NA | 0 | 0  | Low-quality    | Genome-fragment | 4.26  | 0 |
| S1-final-viral-combined_k141_382828  | [full   | 3208  | No   | NA | 0 | 2  | Not-determined | Genome-fragment | NA    | 0 |
| S1-final-viral-combined_k141_33661   | [full   | 1245  | No   | NA | 0 | 0  | Not-determined | Genome-fragment | NA    | 0 |
| S1-final-viral-combined_k141_366471  | [full   | 3089  | No   | NA | 0 | 2  | Not-determined | Genome-fragment | NA    | 0 |
| S1-final-viral-combined_k141_382860  | [full   | 5283  | No   | NA | 0 | 1  | Not-determined | Genome-fragment | NA    | 0 |
| S3-final-viral-combined_k141_10332   | [full   | 1300  | No   | NA | 0 | 1  | Low-quality    | Genome-fragment | 1.23  | 0 |
| S1-final-viral-combined_k141_366492  | [full   | 1114  | No   | NA | 0 | 0  | Not-determined | Genome-fragment | NA    | 0 |
| S7_k141_8047                         | [full   | 1300  | No   | NA | 2 | 0  | Low-quality    | Genome-fragment | 2.94  | 0 |
| S1-final-viral-combined_k141_366494  | [full   | 3124  | No   | NA | 0 | 3  | Not-determined | Genome-fragment | NA    | 0 |
| S12-final-viral-combined_k141_154155 | [H2gene | 1300  | No   | NA | 2 | 0  | Low-quality    | Genome-fragment | 2.82  | 0 |
| S1-final-viral-combined_k141_120097  | [full   | 2752  | No   | NA | 0 | 2  | Not-determined | Genome-fragment | NA    | 0 |
| S2-final-viral-combined_k141_184482  | [full   | 1300  | No   | NA | 1 | 0  | Low-quality    | Genome-fragment | 2.83  | 0 |
| S2-final-viral-combined_k141_13215   | [full   | 1300  | No   | NA | 1 | 0  | Low-quality    | Genome-fragment | 3.48  | 0 |
| S4-final-viral-combined_k141_18294   | [full   | 1300  | No   | NA | 0 | 0  | Low-quality    | Genome-fragment | 0.88  | 0 |
| S6-final-viral-combined_k141_77130   | [full   | 1300  | No   | NA | 0 | 0  | Low-quality    | Genome-fragment | 1.02  | 0 |
| S1-final-viral-combined_k141_382889  | [full   | 1417  | No   | NA | 0 | 0  | Not-determined | Genome-fragment | NA    | 0 |
| S1-final-viral-combined_k141_35034   | [full   | 3818  | No   | NA | 0 | 2  | Not-determined | Genome-fragment | NA    | 0 |
| S1-final-viral-combined_k141_185969  | [full   | 1079  | No   | NA | 0 | 0  | Not-determined | Genome-fragment | NA    | 0 |
| S6-final-viral-combined_k141_75414   | [full   | 1300  | No   | NA | 0 | 0  | Low-quality    | Genome-fragment | 1.89  | 0 |
| S6-final-viral-combined_k141_58560   | [full   | 1300  | No   | NA | 0 | 0  | Low-quality    | Genome-fragment | 0.74  | 0 |
| S1-final-viral-combined_k141_35043   | [full   | 1810  | No   | NA | 0 | 2  | Not-determined | Genome-fragment | NA    | 0 |
| S1-final-viral-combined_k141_317684  | [full   | 3134  | No   | NA | 0 | 3  | Not-determined | Genome-fragment | NA    | 0 |
| S8-final-viral-combined_k141_69362   | [full   | 1300  | No   | NA | 0 | 1  | Low-quality    | Genome-fragment | 0.73  | 0 |
| S8-final-viral-combined_k141_120468  | [full   | 1300  | No   | NA | 1 | 0  | Low-quality    | Genome-fragment | 2.48  | 0 |
| S1-final-viral-combined_k141_37364   | [full   | 15419 | No   | NA | 0 | 9  | Not-determined | Genome-fragment | NA    | 0 |
| S1-final-viral-combined_k141_102779  | [full   | 5413  | No   | NA | 0 | 4  | Not-determined | Genome-fragment | NA    | 0 |
| S1-final-viral-combined_k141_102781  | [full   | 1640  | No   | NA | 2 | 2  | Not-determined | Genome-fragment | NA    | 0 |
| S1-final-viral-combined_k141_102797  | [full   | 2497  | No   | NA | 0 | 5  | Not-determined | Genome-fragment | NA    | 0 |
| S1-final-viral-combined_k141_53711   | [full   | 1716  | No   | NA | 0 | 2  | Not-determined | Genome-fragment | NA    | 0 |
| S8-final-viral-combined_k141_238279  | [full   | 1300  | No   | NA | 0 | 0  | Low-quality    | Genome-fragment | 1.32  | 0 |
| S11-final-viral-combined_k141_98198  | [full   | 1821  | No   | NA | 0 | 1  | Low-quality    | Genome-fragment | 2.99  | 0 |
| S1-final-viral-combined_k141_4403    | [full   | 16152 | No   | NA | 0 | 10 | Not-determined | Genome-fragment | NA    | 0 |
| S11_k141_290508                      | [full   | 1301  | No   | NA | 0 | 2  | Low-quality    | Genome-fragment | 1.74  | 0 |
| S1-final-viral-combined_k141_44703   | [H2gene | 1301  | No   | NA | 0 | 1  | Low-quality    | Genome-fragment | 2.88  | 0 |
| S1-final-viral-combined_k141_218466  | [full   | 1369  | No   | NA | 0 | 1  | Not-determined | Genome-fragment | NA    | 0 |
| S1-final-viral-combined_k141_69467   | [full   | 2541  | No   | NA | 0 | 2  | Not-determined | Genome-fragment | NA    | 0 |
| S3-final-viral-combined_k141_24956   | [full   | 1301  | No   | NA | 0 | 0  | Low-quality    | Genome-fragment | 0.96  | 0 |
| S1-final-viral-combined_k141_102801  | [full   | 28850 | No   | NA | 0 | 3  | Medium-quality | Genome-fragment | 55.22 | 0 |
| S5-final-viral-combined_k141_8900    | [full   | 1301  | No   | NA | 1 | 0  | Low-quality    | Genome-fragment | 2.66  | 0 |
| S1-final-viral-combined_k141_24992   | [full   | 1248  | No   | NA | 0 | 1  | Not-determined | Genome-fragment | NA    | 0 |
| S12-final-viral-combined_k141_217780 | [full   | 1301  | No   | NA | 0 | 1  | Low-quality    | Genome-fragment | 0.49  | 0 |
| S12-final-viral-combined_k141_235250 | [full   | 1301  | No   | NA | 1 | 0  | Low-quality    | Genome-fragment | 0.84  | 0 |
| S1-final-viral-combined_k141_136798  | [full   | 1573  | No   | NA | 0 | 1  | Not-determined | Genome-fragment | NA    | 0 |
| S1-final-viral-combined_k141_120181  | [full   | 1513  | No   | NA | 0 | 1  | Not-determined | Genome-fragment | NA    | 0 |
| S12-final-viral-combined_k141_288074 | [full   | 1301  | No   | NA | 0 | 0  | Low-quality    | Genome-fragment | 2.5   | 0 |
| S1-final-viral-combined_k141_350557  | [full   | 1872  | No   | NA | 0 | 1  | Not-determined | Genome-fragment | NA    | 0 |
| S12-final-viral-combined_k141_26367  | [full   | 1301  | No   | NA | 0 | 0  | Low-quality    | Genome-fragment | 2.94  | 0 |
| S1-final-viral-combined_k141_218529  | [full   | 2312  | No   | NA | 0 | 2  | Not-determined | Genome-fragment | NA    | 0 |
| S1-final-viral-combined_k141_69541   | [full   | 1501  | No   | NA | 0 | 1  | Not-determined | Genome-fragment | NA    | 0 |
| S1-final-viral-combined_k141_21450   | [full   | 2048  | No   | NA | 0 | 1  | Not-determined | Genome-fragment | NA    | 0 |
| S4-final-viral-combined_k141_73128   | [full   | 1301  | No   | NA | 0 | 1  | Low-quality    | Genome-fragment | 3.4   | 0 |
| S1-final-viral-combined_k141_37455   | [full   | 1585  | No   | NA | 0 | 2  | Not-determined | Genome-fragment | NA    | 0 |
| S6-final-viral-combined_k141_42525   | [H2gene | 1301  | No   | NA | 1 | 0  | Low-quality    | Genome-fragment | 4.2   | 0 |
| S1-final-viral-combined_k141_168361  | [full   | 4162  | No   | NA | 0 | 0  | Not-determined | Genome-fragment | NA    | 0 |
| S8-final-viral-combined_k141_198255  | [full   | 1301  | No   | NA | 0 | 1  | Low-quality    | Genome-fragment | 2.97  | 0 |
| S1-final-viral-combined_k141_27463   | [full   | 6272  | No   | NA | 0 | 4  | Not-determined | Genome-fragment | NA    | 0 |
| S1-final-viral-combined_k141_201545  | [full   | 3874  | No   | NA | 0 | 2  | Not-determined | Genome-fragment | NA    | 0 |
| S1-final-viral-combined_k141_235063  | [full   | 1857  | No   | NA | 0 | 1  | Not-determined | Genome-fragment | NA    | 0 |
| S1-final-viral-combined_k141_26757   | [full   | 2010  | No   | NA | 0 | 0  | Not-determined | Genome-fragment | NA    | 0 |
| S1-final-viral-combined_k141_86625   | [full   | 1930  | No   | NA | 0 | 0  | Not-determined | Genome-fragment | NA    | 0 |
| S1-final-viral-combined_k141_69579   | [full   | 3316  | No   | NA | 0 | 0  | Not-determined | Genome-fragment | NA    | 0 |
| S1-final-viral-combined_k141_53859   | [full   | 2583  | No   | NA | 0 | 2  | Not-determined | Genome-fragment | NA    | 0 |
| S1-final-viral-combined_k141_252016  | [full   | 1028  | No   | NA | 0 | 1  | Not-determined | Genome-fragment | NA    | 0 |
| S1-final-viral-combined_k141_168587  | [full   | 3460  | No   | NA | 0 | 0  | Not-determined | Genome-fragment | NA    | 0 |
| S1-final-viral-combined_k141_218581  | [full   | 2391  | No   | NA | 0 | 0  | Not-determined | Genome-fragment | NA    | 0 |
| S9-final-viral-combined_k141_97200   | [H2gene | 1302  | No   | NA | 1 | 0  | Low-quality    | Genome-fragment | 3.3   | 0 |
| S1-final-viral-combined_k141_4564    | [full   | 1165  | No   | NA | 0 | 0  | Not-determined | Genome-fragment | NA    | 0 |
| S1-final-viral-combined_k141_389538  | [full   | 1302  | No   | NA | 0 | 1  | Low-quality    | Genome-fragment | 0.63  | 0 |
| S1-final-viral-combined_k141_64679   | [full   | 1302  | No   | NA | 0 | 1  | Low-quality    | Genome-fragment | 0.89  | 0 |
| S3-final-viral-combined_k141_27123   | [full   | 1302  | No   | NA | 0 | 0  | Low-quality    | Genome-fragment | 3.61  | 0 |
| S1-final-viral-combined_k141_152756  | [full   | 27818 | No   | NA | 0 | 16 | Not-determined | Genome-fragment | NA    | 0 |
| S1-final-viral-combined_k141_102296  | [full   | 3574  | No   | NA | 0 | 0  | Not-determined | Genome-fragment | NA    | 0 |
| S1-final-viral-combined_k141_366632  | [full   | 5534  | No   | NA | 0 | 3  | Not-determined | Genome-fragment | NA    | 0 |
| S1-final-viral-combined_k141_103000  | [full   | 2008  | No   | NA | 0 | 1  | Not-determined | Genome-fragment | NA    | 0 |
| S1-final-viral-combined_k141_102920  | [full   | 1296  | No   | NA | 0 | 0  | Not-determined | Genome-fragment | NA    | 0 |
| S1-final-viral-combined_k141_120311  | [full   | 1672  | No   | NA | 0 | 3  | Not-determined | Genome-fragment | NA    | 0 |
| S1-final-viral-combined_k141_213313  | [full   | 2458  | No   | NA | 0 | 2  | Not-determined | Genome-fragment | NA    | 0 |
| S3-final-viral-combined_k141_106407  | [full   | 1302  | No   | NA | 0 | 2  | Low-quality    | Genome-fragment | 0.96  | 0 |
| S5-final-viral-combined_k141_169014  | [full   | 1302  | No   | NA | 1 | 2  | Low-quality    | Genome-fragment | 1.39  | 0 |
| S7-final-viral-combined_k141_116722  | [H2gene | 1302  | No   | NA | 1 | 0  | Low-quality    | Genome-fragment | 2.62  | 0 |
| S7_k141_226280                       | [full   | 1302  | No   | NA | 0 | 0  | Low-quality    | Genome-fragment | 2.73  | 0 |
| S1-final-viral-combined_k141_53869   | [full   | 1742  | No   | NA | 0 | 2  | Not-determined | Genome-fragment | NA    | 0 |
| S1-final-viral-combined_k141_317890  | [full   | 11345 | No   | NA | 0 | 8  | Not-determined | Genome-fragment | NA    | 0 |
| S17_k141_95390                       | [full   | 1302  | No   | NA | 1 | 0  | Low-quality    | Genome-fragment | 3.39  | 0 |
| S4-final-viral-combined_k141_138100  | [full   | 1302  | No   | NA | 1 | 0  | Low-quality    | Genome-fragment | 3.11  | 0 |
| S1-final-viral-combined_k141_235083  | [full   | 3280  | No   | NA | 0 | 1  | Not-determined | Genome-fragment | NA    | 0 |
| S1-final-viral-combined_k141_120348  | [full   | 2511  | No   | NA | 0 | 0  | Not-determined | Genome-fragment | NA    | 0 |
| S1-final-viral-combined_k141_383133  | [full   | 1121  | No   | NA | 0 | 1  | Not-determined | Genome-fragment | NA    | 0 |
| S1-final-viral-combined_k141_152828  | [full   | 5176  | No   | NA | 0 | 5  | Not-determined | Genome-fragment | NA    | 0 |
| S8-final-viral-combined_k141_26680   | [full   | 1302  | No   | NA | 0 | 0  | Low-quality    | Genome-fragment | 2.85  | 0 |
| S1-final-viral-combined_k141_267840  | [full   | 1685  | No   | NA | 0 | 2  | Not-determined | Genome-fragment | NA    | 0 |
| S1-final-viral-combined_k141_301628  | [full   | 8878  | No   | NA | 0 | 4  | Not-determined | Genome-fragment | NA    | 0 |
| S8_k141_105122                       | [full   | 1302  | No   | NA | 0 | 1  | Low-quality    | Genome-fragment | 0.48  | 0 |
| S1-final-viral-combined_k141_203311  | [full   | 2215  | No   | NA | 0 | 1  | Not-determined | Genome-fragment | NA    | 0 |
| S1-final-viral-combined_k141_284761  | [full   | 1127  | No   | NA | 0 | 1  | Not-determined | Genome-fragment | NA    | 0 |
| S8_k141_151317                       | [full   | 1302  | No   | NA | 0 | 0  | Low-quality    | Genome-fragment | 0.91  | 0 |
| S9-final-viral-combined_k141_93907   | [full   | 1303  | No   | NA | 0 | 0  | Low-quality    | Genome-fragment | 2.12  | 0 |
| S1-final-viral-combined_k141_350691  | [full   | 1753  | No   | NA | 0 | 2  | Not-determined | Genome-fragment | NA    | 0 |
| S1-final-viral-combined_k141_383172  | [full   | 1799  | No   | NA | 0 | 0  | Not-determined | Genome-fragment | NA    | 0 |
| S11-final-viral-combined_k141_123691 | [full   | 1303  | No   | NA | 0 | 0  | Low-quality    | Genome-fragment | 2.61  | 0 |
| S1-final-viral-combined_k141_366710  | [full   | 13558 | No   | NA | 0 | 6  | Not-determined | Genome-fragment | NA    | 0 |
| S1-final-viral-combined_k141_218650  | [full   | 15962 | No   | NA | 0 | 9  | Not-determined | Genome-fragment | NA    | 0 |
| S1-final-viral-combined_k141_202359  | [full   | 2107  | No   | NA | 0 | 1  | Not-determined | Genome-fragment | NA    | 0 |
| S1-final-viral-combined_k141_37418   | [full   | 1303  | No   | NA | 0 | 0  | Low-quality    | Genome-fragment | 1.77  | 0 |
| S1-final-viral-combined_k141_225546  | [full   | 1303  | No   | NA | 0 | 0  | Low-quality    | Genome-fragment | 2.25  | 0 |
| S5-final-viral-combined_k141_34793   | [full   | 1303  | No   | NA | 3 | 0  | Low-quality    | Genome-fragment | 3.34  | 0 |
| S7-final-viral-combined_k141_95385   | [full   | 1303  | No   | NA | 0 | 0  | Low-quality    | Genome-fragment | 2.18  | 0 |
| S1-final-viral-combined_k141_366730  | [full   | 2575  | No   | NA | 0 | 2  | Not-determined | Genome-fragment | NA    | 0 |
| S1-final-viral-combined_k141_86725   | [full   | 2748  | No   | NA | 0 | 0  | Not-determined | Genome-fragment | NA    | 0 |
| S7-final-viral-combined_k141_224150  | [full   | 1303  | No   | NA | 0 | 0  | Low-quality    | Genome-fragment | 3.59  | 0 |
| S1-final-viral-combined_k141_4679    | [full   | 8732  | No   | NA | 0 | 9  | Not-determined | Genome-fragment | NA    | 0 |
| S1-final-viral-combined_k141_120456  | [full   | 5308  | No   | NA | 0 | 4  | Not-determined | Genome-fragment | NA    | 0 |
| S17-final-viral-combined_k141_256960 | [H2gene | 1303  | No   | NA | 1 | 0  | Low-quality    | Genome-fragment | 2.85  | 0 |
| S12-final-viral-combined_k141_358321 | [full   | 1303  | No   | NA | 0 | 0  | Low-quality    | Genome-fragment | 3.15  | 0 |
| S12-final-viral-combined_k141_77027  | [full   | 1303  | No   | NA | 0 | 0  | Low-quality    | Genome-fragment | 2.72  | 0 |
| S1-final-viral-combined_k141_202425  | [full   | 2201  | No   | NA | 0 | 1  | Not-determined | Genome-fragment | NA    | 0 |
| S1-final-viral-combined_k141_235209  | [full   | 2188  | No   | NA | 0 | 1  | Not-determined | Genome-fragment | NA    | 0 |
| S12-final-viral-combined_k141_333371 | [full   | 1303  | No   | NA | 1 | 0  | Low-quality    | Genome-fragment | 0.5   | 0 |
| S1-final-viral-combined_k141_218702  | [full   | 4002  | No   | NA | 0 | 2  | Not-determined | Genome-fragment | NA    | 0 |
| S12-final-viral-combined_k141_103156 | [H2gene | 1303  | No   | NA | 0 | 0  | Low-quality    | Genome-fragment | 2.56  | 0 |
| S12_k141_323514                      | [full   | 1303  | No   | NA | 0 | 0  | Low-quality    | Genome-fragment | 3.07  | 0 |
| S1-final-viral-combined_k141_202439  | [full   | 6438  | No   | NA | 0 | 2  | Not-determined | Genome-fragment | NA    | 0 |
| S1-final-viral-combined_k141_186180  | [full   | 4922  | No   | NA | 0 | 2  | Not-determined | Genome-fragment | NA    | 0 |
| S2-final-viral-combined_k141_180810  | [H2gene | 1303  | No   | NA | 1 | 0  | Low-quality    | Genome-fragment | 0.85  | 0 |
| S8-final-viral-combined_k141_219820  | [full   | 1303  | No</ |    |   |    |                |                 |       |   |



|                                      |          |       |     |       |    |    |                |                 |    |       |       |
|--------------------------------------|----------|-------|-----|-------|----|----|----------------|-----------------|----|-------|-------|
| S1-final-viral-combined_k141_367013  | [full]   | 2421  | No  | NA    | 0  | 1  | Not-determined | Genome-fragment | NA | 0     | 0     |
| S1-final-viral-combined_k141_302061  | [full]   | 1094  | No  | NA    | 0  | 2  | Not-determined | Genome-fragment | NA | 0     | 0     |
| S1-final-viral-combined_k141_54076   | [full]   | 2712  | No  | NA    | 0  | 2  | Not-determined | Genome-fragment | NA | 0     | 0     |
| S1-final-viral-combined_k141_202715  | [full]   | 1266  | No  | NA    | 0  | 0  | Not-determined | Genome-fragment | NA | 0     | 0     |
| S1-final-viral-combined_k141_218985  | [full]   | 1219  | No  | NA    | 0  | 1  | Not-determined | Genome-fragment | NA | 0     | 0     |
| S7_k141_200766                       | [full]   | 1306  | No  | NA    | 0  | 0  | Low-quality    | Genome-fragment | NA | 2     | 0     |
| S1-final-viral-combined_k141_252339  | [full]   | 1007  | No  | NA    | 0  | 1  | Not-determined | Genome-fragment | NA | 0     | 0     |
| S12_k141_143456                      | [full]   | 1306  | No  | NA    | 1  | 0  | Low-quality    | Genome-fragment | NA | 2.49  | 0     |
| S2-final-viral-combined_k141_18711   | [full]   | 1306  | No  | NA    | 0  | 0  | Low-quality    | Genome-fragment | NA | 2.97  | 0     |
| S8-final-viral-combined_k141_256873  | [full]   | 1306  | No  | NA    | 0  | 1  | Low-quality    | Genome-fragment | NA | 0.63  | 0     |
| S1-final-viral-combined_k141_5003    | [full]   | 1285  | No  | NA    | 0  | 1  | Not-determined | Genome-fragment | NA | 0     | 0     |
| S8-final-viral-combined_k141_19551   | [H2gene] | 1306  | No  | NA    | 0  | 0  | Low-quality    | Genome-fragment | NA | 3.78  | 0     |
| S1-final-viral-combined_k141_169086  | [full]   | 5509  | No  | NA    | 0  | 3  | Not-determined | Genome-fragment | NA | 0     | 0     |
| S9_k141_65196                        | [full]   | 1307  | No  | NA    | 0  | 1  | Low-quality    | Genome-fragment | NA | 0.85  | 0     |
| S1-final-viral-combined_k141_284864  | [full]   | 14383 | No  | NA    | 0  | 11 | Not-determined | Genome-fragment | NA | 1.41  | 0     |
| S11-final-viral-combined_k141_79340  | [full]   | 1307  | No  | NA    | 0  | 0  | Not-determined | Genome-fragment | NA | 0     | 0     |
| S11-final-viral-combined_k141_327383 | [full]   | 1307  | No  | NA    | 0  | 0  | Low-quality    | Genome-fragment | NA | 0.85  | 0     |
| S1-final-viral-combined_k141_284875  | [full]   | 1890  | No  | NA    | 0  | 2  | Not-determined | Genome-fragment | NA | 0     | 0     |
| S1-final-viral-combined_k141_36969   | [full]   | 4324  | No  | NA    | 0  | 2  | Not-determined | Genome-fragment | NA | 0     | 0     |
| S1-final-viral-combined_k141_120757  | [full]   | 4324  | No  | NA    | 0  | 1  | Not-determined | Genome-fragment | NA | 0     | 0     |
| S1-final-viral-combined_k141_103281  | [full]   | 1915  | No  | NA    | 0  | 2  | Not-determined | Genome-fragment | NA | 0     | 0     |
| S1-final-viral-combined_k141_201878  | [full]   | 1307  | No  | NA    | 0  | 1  | Low-quality    | Genome-fragment | NA | 0.67  | 0     |
| S1-final-viral-combined_k141_252397  | [full]   | 1303  | No  | NA    | 0  | 0  | Not-determined | Genome-fragment | NA | 0     | 0     |
| S1-final-viral-combined_k141_304753  | [full]   | 1307  | No  | NA    | 0  | 0  | Low-quality    | Genome-fragment | NA | 1.89  | 0     |
| S1-final-viral-combined_k141_383579  | [full]   | 2222  | No  | NA    | 0  | 1  | Not-determined | Genome-fragment | NA | 0     | 0     |
| S1-final-viral-combined_k141_383581  | [full]   | 1218  | No  | NA    | 0  | 1  | Not-determined | Genome-fragment | NA | 0     | 0     |
| S1-final-viral-combined_k141_212742  | [full]   | 1307  | No  | NA    | 0  | 0  | Low-quality    | Genome-fragment | NA | 1.92  | 0     |
| S1-final-viral-combined_k141_235508  | [full]   | 6577  | No  | NA    | 0  | 0  | Not-determined | Genome-fragment | NA | 0     | 0     |
| S1-final-viral-combined_k141_235519  | [full]   | 4101  | No  | NA    | 0  | 0  | Not-determined | Genome-fragment | NA | 0     | 0     |
| S1-final-viral-combined_k141_21475   | [full]   | 2875  | No  | NA    | 0  | 1  | Not-determined | Genome-fragment | NA | 0     | 0     |
| S1-final-viral-combined_k141_333758  | [full]   | 1687  | No  | NA    | 0  | 1  | Not-determined | Genome-fragment | NA | 0     | 0     |
| S7-final-viral-combined_k141_11647   | [full]   | 1307  | No  | NA    | 0  | 0  | Low-quality    | Genome-fragment | NA | 3.08  | 0     |
| S1-final-viral-combined_k141_252439  | [full]   | 17383 | No  | NA    | 11 | 0  | Medium-quality | Genome-fragment | NA | 50.91 | 0     |
| S1-final-viral-combined_k141_268194  | [full]   | 2074  | No  | NA    | 0  | 2  | Not-determined | Genome-fragment | NA | 0     | 0     |
| S1-final-viral-combined_k141_54177   | [full]   | 3216  | No  | NA    | 0  | 1  | Not-determined | Genome-fragment | NA | 0     | 0     |
| S1-final-viral-combined_k141_202751  | [full]   | 2362  | No  | NA    | 0  | 0  | Not-determined | Genome-fragment | NA | 0     | 0     |
| S17-final-viral-combined_k141_249118 | [full]   | 1307  | No  | NA    | 0  | 0  | Low-quality    | Genome-fragment | NA | 2.22  | 0     |
| S1-final-viral-combined_k141_118431  | [full]   | 4111  | No  | NA    | 0  | 2  | Not-determined | Genome-fragment | NA | 0     | 0     |
| S1-final-viral-combined_k141_302145  | [full]   | 16356 | No  | NA    | 0  | 9  | Not-determined | Genome-fragment | NA | 0     | 0     |
| S1-final-viral-combined_k141_351117  | [full]   | 1654  | No  | NA    | 0  | 1  | Not-determined | Genome-fragment | NA | 0     | 0     |
| S1-final-viral-combined_k141_383662  | [full]   | 1154  | No  | NA    | 0  | 1  | Not-determined | Genome-fragment | NA | 0     | 0     |
| S1-final-viral-combined_k141_153215  | [full]   | 1221  | No  | NA    | 0  | 2  | Not-determined | Genome-fragment | NA | 0     | 0     |
| S1-final-viral-combined_k141_219156  | [full]   | 2502  | No  | NA    | 0  | 1  | Not-determined | Genome-fragment | NA | 0     | 0     |
| S1-final-viral-combined_k141_383680  | [full]   | 1750  | No  | NA    | 0  | 0  | Not-determined | Genome-fragment | NA | 0     | 0     |
| S1-final-viral-combined_k141_2149    | [full]   | 2540  | No  | NA    | 0  | 2  | Not-determined | Genome-fragment | NA | 0     | 0     |
| S1-final-viral-combined_k141_118450  | [full]   | 18563 | No  | NA    | 0  | 3  | Not-determined | Genome-fragment | NA | 0     | 0     |
| S1-final-viral-combined_k141_186532  | [full]   | 2487  | No  | NA    | 0  | 1  | Not-determined | Genome-fragment | NA | 1.63  | 0     |
| S17-final-viral-combined_k141_185816 | [full]   | 1307  | No  | NA    | 0  | 0  | Low-quality    | Genome-fragment | NA | 0     | 0     |
| S1-final-viral-combined_k141_186536  | [full]   | 2172  | No  | NA    | 0  | 0  | Not-determined | Genome-fragment | NA | 0     | 0     |
| S17-final-viral-combined_k141_121718 | [full]   | 1307  | No  | NA    | 0  | 0  | Low-quality    | Genome-fragment | NA | 2.39  | 0     |
| S12-final-viral-combined_k141_305823 | [full]   | 1307  | No  | NA    | 0  | 0  | Low-quality    | Genome-fragment | NA | 1.56  | 0     |
| S4-final-viral-combined_k141_506232  | [full]   | 1307  | No  | NA    | 0  | 0  | Low-quality    | Genome-fragment | NA | 2.62  | 0     |
| S4-final-viral-combined_k141_163689  | [full]   | 1307  | No  | NA    | 0  | 0  | Low-quality    | Genome-fragment | NA | 1.38  | 0     |
| S9-final-viral-combined_k141_105421  | [full]   | 1308  | No  | NA    | 0  | 0  | Low-quality    | Genome-fragment | NA | 4.68  | 0     |
| S1-final-viral-combined_k141_515     | [full]   | 14445 | No  | NA    | 0  | 1  | Not-determined | Genome-fragment | NA | 0     | 0     |
| S1-final-viral-combined_k141_298522  | [full]   | 1308  | Yes | 804   | 1  | 0  | Low-quality    | Genome-fragment | NA | 0.51  | 38.53 |
| S1-final-viral-combined_k141_5124    | [full]   | 1270  | No  | NA    | 0  | 0  | Not-determined | Genome-fragment | NA | 0     | 0     |
| S1-final-viral-combined_k141_24278   | [full]   | 1407  | No  | NA    | 0  | 0  | Not-determined | Genome-fragment | NA | 0     | 0     |
| S1-final-viral-combined_k141_302166  | [full]   | 75458 | Yes | 40046 | 9  | 17 | Medium-quality | Genome-fragment | NA | 74.67 | 46.59 |
| S3-final-viral-combined_k141_2876    | [full]   | 1308  | No  | NA    | 0  | 1  | Low-quality    | Genome-fragment | NA | 3.84  | 0     |
| S1-final-viral-combined_k141_333937  | [full]   | 1612  | No  | NA    | 0  | 0  | Not-determined | Genome-fragment | NA | 0     | 0     |
| S1-final-viral-combined_k141_351236  | [full]   | 3168  | No  | NA    | 0  | 2  | Not-determined | Genome-fragment | NA | 0     | 0     |
| S17-k141_160067                      | [full]   | 1308  | No  | NA    | 0  | 1  | Low-quality    | Genome-fragment | NA | 1.85  | 0     |
| S1-final-viral-combined_k141_235621  | [full]   | 1684  | No  | NA    | 0  | 0  | Not-determined | Genome-fragment | NA | 0     | 0     |
| S1-final-viral-combined_k141_70049   | [full]   | 9319  | No  | NA    | 0  | 0  | Not-determined | Genome-fragment | NA | 0     | 0     |
| S8-final-viral-combined_k141_33353   | [full]   | 1308  | No  | NA    | 1  | 0  | Low-quality    | Genome-fragment | NA | 3.21  | 0     |
| S1-final-viral-combined_k141_38101   | [full]   | 1819  | No  | NA    | 0  | 1  | Not-determined | Genome-fragment | NA | 0     | 0     |
| S1-final-viral-combined_k141_87156   | [full]   | 1204  | No  | NA    | 0  | 0  | Not-determined | Genome-fragment | NA | 0     | 0     |
| S1-final-viral-combined_k141_153175  | [full]   | 1192  | No  | NA    | 0  | 0  | Not-determined | Genome-fragment | NA | 0     | 0     |
| S9-final-viral-combined_k141_103754  | [H2gene] | 1309  | No  | NA    | 1  | 0  | Low-quality    | Genome-fragment | NA | 0.75  | 0     |
| S1-final-viral-combined_k141_186601  | [full]   | 1794  | No  | NA    | 0  | 1  | Not-determined | Genome-fragment | NA | 0     | 0     |
| S11-final-viral-combined_k141_27847  | [full]   | 1309  | No  | NA    | 0  | 0  | Low-quality    | Genome-fragment | NA | 1.14  | 0     |
| S1-final-viral-combined_k141_5176    | [full]   | 5916  | No  | NA    | 0  | 3  | Not-determined | Genome-fragment | NA | 0     | 0     |
| S11-final-viral-combined_k141_93509  | [H2gene] | 1309  | No  | NA    | 2  | 0  | Low-quality    | Genome-fragment | NA | 2.99  | 0     |
| S1-final-viral-combined_k141_153189  | [full]   | 1173  | No  | NA    | 0  | 0  | Not-determined | Genome-fragment | NA | 0     | 0     |
| S1-final-viral-combined_k141_21596   | [full]   | 2560  | No  | NA    | 0  | 1  | Not-determined | Genome-fragment | NA | 0     | 0     |
| S1-final-viral-combined_k141_70078   | [full]   | 4001  | No  | NA    | 0  | 3  | Not-determined | Genome-fragment | NA | 0     | 0     |
| S1-final-viral-combined_k141_265012  | [full]   | 77510 | Yes | 45999 | 25 | 28 | High-quality   | High-quality    | NA | 97.02 | 40.65 |
| S1-final-viral-combined_k141_219161  | [full]   | 1566  | No  | NA    | 0  | 2  | Not-determined | Genome-fragment | NA | 0     | 0     |
| S5-final-viral-combined_k141_138283  | [full]   | 1309  | No  | NA    | 0  | 2  | Low-quality    | Genome-fragment | NA | 1.32  | 0     |
| S1-final-viral-combined_k141_21608   | [full]   | 3222  | No  | NA    | 0  | 0  | Not-determined | Genome-fragment | NA | 0     | 0     |
| S1-final-viral-combined_k141_12051   | [full]   | 1584  | No  | NA    | 0  | 0  | Not-determined | Genome-fragment | NA | 0     | 0     |
| S1-final-viral-combined_k141_153411  | [full]   | 2646  | No  | NA    | 0  | 3  | Not-determined | Genome-fragment | NA | 0     | 0     |
| S1-final-viral-combined_k141_367335  | [full]   | 2516  | No  | NA    | 0  | 1  | Not-determined | Genome-fragment | NA | 0     | 0     |
| S7-final-viral-combined_k141_157890  | [full]   | 1309  | No  | NA    | 0  | 0  | Low-quality    | Genome-fragment | NA | 2.77  | 0     |
| S17-final-viral-combined_k141_122744 | [full]   | 1309  | No  | NA    | 2  | 0  | Low-quality    | Genome-fragment | NA | 2.06  | 0     |
| S2_k141_221845                       | [full]   | 1309  | No  | NA    | 0  | 1  | Low-quality    | Genome-fragment | NA | 1.36  | 0     |
| S4-final-viral-combined_k141_100003  | [full]   | 1309  | No  | NA    | 0  | 0  | Low-quality    | Genome-fragment | NA | 3.62  | 0     |
| S1-final-viral-combined_k141_54369   | [full]   | 1485  | No  | NA    | 0  | 2  | Not-determined | Genome-fragment | NA | 0     | 0     |
| S1-final-viral-combined_k141_169259  | [full]   | 1561  | No  | NA    | 0  | 1  | Not-determined | Genome-fragment | NA | 0     | 0     |
| S4_k141_64029                        | [full]   | 1309  | No  | NA    | 1  | 0  | Low-quality    | Genome-fragment | NA | 1.37  | 0     |
| S1-final-viral-combined_k141_186763  | [full]   | 1209  | No  | NA    | 0  | 0  | Not-determined | Genome-fragment | NA | 0     | 0     |
| S1-final-viral-combined_k141_202974  | [full]   | 1235  | No  | NA    | 0  | 0  | Not-determined | Genome-fragment | NA | 0     | 0     |
| S1-final-viral-combined_k141_137574  | [full]   | 1461  | No  | NA    | 0  | 2  | Not-determined | Genome-fragment | NA | 0     | 0     |
| S1-final-viral-combined_k141_25248   | [full]   | 2102  | No  | NA    | 0  | 0  | Not-determined | Genome-fragment | NA | 0     | 0     |
| S8-final-viral-combined_k141_251601  | [H2gene] | 1309  | No  | NA    | 1  | 0  | Low-quality    | Genome-fragment | NA | 1.78  | 0     |
| S1-final-viral-combined_k141_253446  | [full]   | 1310  | No  | NA    | 0  | 0  | Low-quality    | Genome-fragment | NA | 3.35  | 0     |
| S1-final-viral-combined_k141_186802  | [full]   | 2008  | No  | NA    | 0  | 1  | Not-determined | Genome-fragment | NA | 0     | 0     |
| S1-final-viral-combined_k141_372511  | [full]   | 9500  | No  | NA    | 0  | 0  | Not-determined | Genome-fragment | NA | 0     | 0     |
| S1-final-viral-combined_k141_111515  | [H2gene] | 1310  | No  | NA    | 0  | 0  | Low-quality    | Genome-fragment | NA | 3.35  | 0     |
| S1-final-viral-combined_k141_203026  | [full]   | 1352  | No  | NA    | 0  | 1  | Not-determined | Genome-fragment | NA | 0     | 0     |
| S1-final-viral-combined_k141_137626  | [full]   | 2616  | No  | NA    | 0  | 2  | Not-determined | Genome-fragment | NA | 0     | 0     |
| S3_k141_117364                       | [full]   | 1310  | No  | NA    | 0  | 0  | Low-quality    | Genome-fragment | NA | 0.6   | 0     |
| S1-final-viral-combined_k141_153489  | [full]   | 1710  | No  | NA    | 0  | 1  | Not-determined | Genome-fragment | NA | 0     | 0     |
| S1-final-viral-combined_k141_137627  | [full]   | 13812 | No  | NA    | 0  | 1  | Not-determined | Genome-fragment | NA | 0     | 0     |
| S5-final-viral-combined_k141_69313   | [full]   | 1310  | No  | NA    | 0  | 1  | Low-quality    | Genome-fragment | NA | 1.78  | 0     |
| S1-final-viral-combined_k141_302360  | [full]   | 2503  | No  | NA    | 0  | 2  | Not-determined | Genome-fragment | NA | 0     | 0     |
| S1-final-viral-combined_k141_251441  | [full]   | 1776  | No  | NA    | 0  | 1  | Not-determined | Genome-fragment | NA | 0     | 0     |
| S1-final-viral-combined_k141_150153  | [H2gene] | 1580  | No  | NA    | 0  | 0  | Low-quality    | Genome-fragment | NA | 3.25  | 0     |
| S1-final-viral-combined_k141_186878  | [full]   | 27776 | No  | NA    | 9  | 1  | Medium-quality | Genome-fragment | NA | 65.78 | 0     |
| S7-final-viral-combined_k141_104856  | [full]   | 1310  | No  | NA    | 0  | 0  | Low-quality    | Genome-fragment | NA | 3.2   | 0     |
| S17-final-viral-combined_k141_6961   | [full]   | 1310  | No  | NA    | 0  | 0  | Low-quality    | Genome-fragment | NA | 1.2   | 0     |
| S1-final-viral-combined_k141_18666   | [full]   | 3370  | No  | NA    | 0  | 2  | Not-determined | Genome-fragment | NA | 0     | 0     |
| S17-final-viral-combined_k141_22943  | [full]   | 1310  | No  | NA    | 1  | 0  | Low-quality    | Genome-fragment | NA | 2.86  | 0     |
| S1-final-viral-combined_k141_285192  | [full]   | 7621  | No  | NA    | 0  | 2  | Not-determined | Genome-fragment | NA | 0     | 0     |
| S17-final-viral-combined_k141_125732 | [full]   | 1310  | No  | NA    | 1  | 0  | Low-quality    | Genome-fragment | NA | 1.83  | 0     |
| S1-final-viral-combined_k141_121223  | [full]   | 1047  | No  | NA    | 0  | 2  | Not-determined | Genome-fragment | NA | 0     | 0     |
| S17-final-viral-combined_k141_185824 | [full]   | 1310  | No  | NA    | 0  | 0  | Low-quality    | Genome-fragment | NA | 0.73  | 0     |
| S1-final-viral-combined_k141_186831  | [full]   | 1249  | No  | NA    | 0  | 1  | Not-determined | Genome-fragment | NA | 0     | 0     |
| S1-final-viral-combined_k141_134105  | [full]   | 2368  | No  | NA    | 0  | 2  | Not-determined | Genome-fragment | NA | 0     | 0     |
| S1-final-viral-combined_k141_138703  | [full]   | 2659  | No  | NA    | 0  | 0  | Not-determined | Genome-fragment | NA | 0     | 0     |
| S12-final-viral-combined_k141_180214 | [full]   | 1310  | No  | NA    | 0  |    |                |                 |    |       |       |



|                                      |          |        |    |    |    |              |                 |                 |       |   |
|--------------------------------------|----------|--------|----|----|----|--------------|-----------------|-----------------|-------|---|
| S12-final-viral-combined_k141_44760  | [full]   | 1313   | No | NA | 0  | 1            | Low-quality     | Genome-fragment | 2.37  | 0 |
| S1-final-viral-combined_k141_334248  | [full]   | 3402   | No | NA | 0  | 2            | Not-determined  | Genome-fragment | NA    | 0 |
| S12-final-viral-combined_k141_44771  | [full]   | 1313   | No | NA | 0  | 1            | Low-quality     | Genome-fragment | 1.65  | 0 |
| S12-final-viral-combined_k141_348057 | [full]   | 1313   | No | NA | 0  | 0            | Low-quality     | Genome-fragment | 1.59  | 0 |
| S12-final-viral-combined_k141_48439  | [full]   | 1313   | No | NA | 0  | 0            | Low-quality     | Genome-fragment | 2.09  | 0 |
| S1-final-viral-combined_k141_153670  | [full]   | 2781   | No | NA | 1  | 0            | Medium-quality  | Genome-fragment | 50.3  | 0 |
| S1-final-viral-combined_k141_21942   | [full]   | 5759   | No | NA | 0  | 3            | Not-determined  | Genome-fragment | NA    | 0 |
| S1-final-viral-combined_k141_103520  | [full]   | 2663   | No | NA | 0  | 3            | Not-determined  | Genome-fragment | NA    | 0 |
| S2-final-viral-combined_k141_15121   | [full]   | 1313   | No | NA | 0  | 0            | Low-quality     | Genome-fragment | 3.05  | 0 |
| S1-final-viral-combined_k141_268632  | [full]   | 1985   | No | NA | 0  | 0            | Not-determined  | Genome-fragment | NA    | 0 |
| S1-final-viral-combined_k141_219707  | [full]   | 1308   | No | NA | 0  | 1            | Not-determined  | Genome-fragment | NA    | 0 |
| S1-final-viral-combined_k141_70503   | [full]   | 1995   | No | NA | 0  | 0            | Not-determined  | Genome-fragment | NA    | 0 |
| S1-final-viral-combined_k141_203335  | [full]   | 1304   | No | NA | 0  | 0            | Not-determined  | Genome-fragment | NA    | 0 |
| S1-final-viral-combined_k141_268648  | [full]   | 2559   | No | NA | 0  | 2            | Not-determined  | Genome-fragment | NA    | 0 |
| S2-final-viral-combined_k141_39321   | [H2gene] | 1313   | No | NA | 1  | 0            | Low-quality     | Genome-fragment | 1.92  | 0 |
| S1-final-viral-combined_k141_187251  | [full]   | 4769   | No | NA | 0  | 3            | Not-determined  | Genome-fragment | NA    | 0 |
| S1-final-viral-combined_k141_252972  | [full]   | 1240   | No | NA | 0  | 0            | Not-determined  | Genome-fragment | NA    | 0 |
| S1-final-viral-combined_k141_38464   | [full]   | 1178   | No | NA | 0  | 1            | Not-determined  | Genome-fragment | NA    | 0 |
| S1-final-viral-combined_k141_121239  | [full]   | 2527   | No | NA | 0  | 0            | Not-determined  | Genome-fragment | NA    | 0 |
| S1-final-viral-combined_k141_5507    | [full]   | 4026   | No | NA | 0  | 3            | Not-determined  | Genome-fragment | NA    | 0 |
| S1-final-viral-combined_k141_351665  | [full]   | 1057   | No | NA | 0  | 2            | Not-determined  | Genome-fragment | NA    | 0 |
| S4-final-viral-combined_k141_38466   | [full]   | 1213   | No | NA | 0  | 2            | Low-quality     | Genome-fragment | 0.44  | 0 |
| S1-final-viral-combined_k141_169512  | [full]   | 1802   | No | NA | 0  | 2            | Not-determined  | Genome-fragment | NA    | 0 |
| S4-final-viral-combined_k141_25182   | [full]   | 1313   | No | NA | 0  | 1            | Low-quality     | Genome-fragment | 0.38  | 0 |
| S4-final-viral-combined_k141_124174  | [H2gene] | 1313   | No | NA | 1  | 0            | Low-quality     | Genome-fragment | 3.51  | 0 |
| S1-final-viral-combined_k141_384120  | [full]   | 3118   | No | NA | 0  | 3            | Not-determined  | Genome-fragment | NA    | 0 |
| S6_k141_100921                       |          | 1313   | No | NA | 0  | 0            | Low-quality     | Genome-fragment | 0.96  | 0 |
| S1-final-viral-combined_k141_5525    | [full]   | 2842   | No | NA | 0  | 1            | Not-determined  | Genome-fragment | NA    | 0 |
| S9-final-viral-combined_k141_102441  | [H2gene] | 1314   | No | NA | 2  | 0            | Low-quality     | Genome-fragment | 4.1   | 0 |
| S1-final-viral-combined_k141_285537  | [full]   | 2217   | No | NA | 0  | 0            | Not-determined  | Genome-fragment | NA    | 0 |
| S1-final-viral-combined_k141_248895  | [full]   | 1593   | No | NA | 0  | 1            | Not-determined  | Genome-fragment | NA    | 0 |
| S1-final-viral-combined_k141_394078  | [full]   | 1314   | No | NA | 0  | 1            | Low-quality     | Genome-fragment | 0.5   | 0 |
| S1-final-viral-combined_k141_285542  | [full]   | 4714   | No | NA | 0  | 4            | Not-determined  | Genome-fragment | NA    | 0 |
| S1-final-viral-combined_k141_236135  | [full]   | 2471   | No | NA | 0  | 1            | Not-determined  | Genome-fragment | NA    | 0 |
| S7-final-viral-combined_k141_134799  | [H2gene] | 1314   | No | NA | 1  | 0            | Low-quality     | Genome-fragment | 2.46  | 0 |
| S1-final-viral-combined_k141_87549   | [full]   | 1506   | No | NA | 0  | 1            | Not-determined  | Genome-fragment | NA    | 0 |
| S17-k141_194874                      |          | 1314   | No | NA | 0  | 0            | Low-quality     | Genome-fragment | 2.98  | 0 |
| S1-final-viral-combined_k141_367877  | [full]   | 2093   | No | NA | 0  | 1            | Not-determined  | Genome-fragment | NA    | 0 |
| S12-final-viral-combined_k141_270706 | [full]   | 1314   | No | NA | 0  | 0            | Low-quality     | Genome-fragment | 1.92  | 0 |
| S1-final-viral-combined_k141_351734  | [full]   | 1582   | No | NA | 0  | 0            | Not-determined  | Genome-fragment | NA    | 0 |
| S1-final-viral-combined_k141_149566  | [full]   | 1132   | No | NA | 0  | 0            | Not-determined  | Genome-fragment | NA    | 0 |
| S6-final-viral-combined_k141_14212   | [full]   | 1314   | No | NA | 0  | 0            | Low-quality     | Genome-fragment | 3.61  | 0 |
| S1-final-viral-combined_k141_253045  | [full]   | 4336   | No | NA | 0  | 2            | Not-determined  | Genome-fragment | NA    | 0 |
| S1-final-viral-combined_k141_5600    | [full]   | 5930   | No | NA | 0  | 2            | Not-determined  | Genome-fragment | NA    | 0 |
| S1-final-viral-combined_k141_28542   | [full]   | 2213   | No | NA | 0  | 0            | Not-determined  | Genome-fragment | NA    | 0 |
| S6-final-viral-combined_k141_48055   | [full]   | 1314   | No | NA | 0  | 0            | Low-quality     | Genome-fragment | 4.5   | 0 |
| S1-final-viral-combined_k141_236184  | [full]   | 2146   | No | NA | 0  | 2            | Not-determined  | Genome-fragment | NA    | 0 |
| S8-final-viral-combined_k141_49724   | [full]   | 1314   | No | NA | 0  | 0            | Low-quality     | Genome-fragment | 2.33  | 0 |
| S8-final-viral-combined_k141_125600  | [full]   | 1314   | No | NA | 0  | 0            | Low-quality     | Genome-fragment | 1.76  | 0 |
| S1-final-viral-combined_k141_268766  | [full]   | 1486   | No | NA | 0  | 0            | Not-determined  | Genome-fragment | NA    | 0 |
| S1-final-viral-combined_k141_5639    | [full]   | 2542   | No | NA | 0  | 1            | Not-determined  | Genome-fragment | NA    | 0 |
| S1-final-viral-combined_k141_203055  | [full]   | 2110   | No | NA | 0  | 0            | Not-determined  | Genome-fragment | NA    | 0 |
| S1-final-viral-combined_k141_87637   | [full]   | 12267  | No | NA | 0  | 0            | Not-determined  | Genome-fragment | NA    | 0 |
| S1-final-viral-combined_k141_367935  | [full]   | 4324   | No | NA | 0  | 3            | Not-determined  | Genome-fragment | NA    | 0 |
| S8_k141_274072                       |          | 1314   | No | NA | 0  | 0            | Low-quality     | Genome-fragment | 0.36  | 0 |
| S9-final-viral-combined_k141_95017   | [full]   | 1315   | No | NA | 0  | 0            | Low-quality     | Genome-fragment | 3.48  | 0 |
| S1-final-viral-combined_k141_187378  | [full]   | 22827  | No | NA | 0  | 10           | Not-determined  | Genome-fragment | NA    | 0 |
| S1-final-viral-combined_k141_118882  | [full]   | 1315   | No | NA | 0  | 0            | Low-quality     | Genome-fragment | 3.16  | 0 |
| S1-final-viral-combined_k141_81841   | [full]   | 1315   | No | NA | 0  | 0            | Low-quality     | Genome-fragment | 0.37  | 0 |
| S1-final-viral-combined_k141_351784  | [full]   | 2729   | No | NA | 0  | 1            | Not-determined  | Genome-fragment | NA    | 0 |
| S1-final-viral-combined_k141_390523  | [full]   | 1315   | No | NA | 0  | 0            | Low-quality     | Genome-fragment | 3.01  | 0 |
| S1_k141_285192                       |          | 1315   | No | NA | 0  | 0            | Low-quality     | Genome-fragment | 3.3   | 0 |
| S1-final-viral-combined_k141_5704    | [full]   | 2601   | No | NA | 0  | 2            | Not-determined  | Genome-fragment | NA    | 0 |
| S5-final-viral-combined_k141_191946  | [full]   | 1315   | No | NA | 0  | 0            | Low-quality     | Genome-fragment | 0.78  | 0 |
| S1-final-viral-combined_k141_203547  | [full]   | 1402   | No | NA | 0  | 2            | Not-determined  | Genome-fragment | NA    | 0 |
| S1-final-viral-combined_k141_187445  | [full]   | 2614   | No | NA | 0  | 0            | Not-determined  | Genome-fragment | NA    | 0 |
| S1-final-viral-combined_k141_38627   | [full]   | 3864   | No | NA | 0  | 2            | Not-determined  | Genome-fragment | NA    | 0 |
| S7-final-viral-combined_k141_165859  | [full]   | 1315   | No | NA | 0  | 0            | Low-quality     | Genome-fragment | 1.28  | 0 |
| S7-final-viral-combined_k141_78292   | [full]   | 1315   | No | NA | 0  | 0            | Low-quality     | Genome-fragment | 1.18  | 0 |
| S17-final-viral-combined_k141_197067 | [full]   | 1315   | No | NA | 0  | 2            | Low-quality     | Genome-fragment | 0.45  | 0 |
| S17-final-viral-combined_k141_158318 | [H2gene] | 1315   | No | NA | 1  | 0            | Low-quality     | Genome-fragment | 2.51  | 0 |
| S12-final-viral-combined_k141_143363 | [full]   | 1315   | No | NA | 0  | 2            | Low-quality     | Genome-fragment | 1.62  | 0 |
| S12-final-viral-combined_k141_133597 | [full]   | 1315   | No | NA | 3  | 0            | Low-quality     | Genome-fragment | 3.07  | 0 |
| S12_k141_381962                      |          | 1315   | No | NA | 0  | 1            | Low-quality     | Genome-fragment | 0.89  | 0 |
| S1-final-viral-combined_k141_203572  | [full]   | 1600   | No | NA | 0  | 0            | Not-determined  | Genome-fragment | NA    | 0 |
| S2-final-viral-combined_k141_198067  | [H2gene] | 1315   | No | NA | 2  | 0            | Low-quality     | Genome-fragment | 3.35  | 0 |
| S4-final-viral-combined_k141_49645   | [H2gene] | 1315   | No | NA | 1  | 0            | Low-quality     | Genome-fragment | 2.12  | 0 |
| S6-final-viral-combined_k141_135161  | [H2gene] | 1315   | No | NA | 1  | 0            | Low-quality     | Genome-fragment | 2.09  | 0 |
| S9-final-viral-combined_k141_38245   | [full]   | 1316   | No | NA | 0  | 1            | Low-quality     | Genome-fragment | 2.17  | 0 |
| S1-final-viral-combined_k141_365002  | [full]   | 1316   | No | NA | 0  | 0            | Low-quality     | Genome-fragment | 1.27  | 0 |
| S1-final-viral-combined_k141_233159  | [full]   | 4554   | No | NA | 0  | 4            | Not-determined  | Genome-fragment | NA    | 0 |
| S1-final-viral-combined_k141_371321  | [full]   | 1316   | No | NA | 0  | 0            | Low-quality     | Genome-fragment | 2.76  | 0 |
| S1-final-viral-combined_k141_89087   | [H2gene] | 1316   | No | NA | 1  | 0            | Low-quality     | Genome-fragment | 3.43  | 0 |
| S1-final-viral-combined_k141_153727  | [full]   | 2103   | No | NA | 0  | 0            | Not-determined  | Genome-fragment | NA    | 0 |
| S5-final-viral-combined_k141_28759   | [full]   | 1316   | No | NA | 0  | 0            | Low-quality     | Genome-fragment | 3.73  | 0 |
| S1-final-viral-combined_k141_351889  | [full]   | 32026  | No | NA | 12 | 0            | Medium-quality  | Genome-fragment | 77.09 | 0 |
| S1-final-viral-combined_k141_236291  | [full]   | 2950   | No | NA | 0  | 0            | Not-determined  | Genome-fragment | NA    | 0 |
| S5-final-viral-combined_k141_21274   | [H2gene] | 1316   | No | NA | 1  | 0            | Low-quality     | Genome-fragment | 2.02  | 0 |
| S12-final-viral-combined_k141_25221  | [H2gene] | 1316   | No | NA | 1  | 0            | Low-quality     | Genome-fragment | 3.02  | 0 |
| S12-final-viral-combined_k141_60918  | [H2gene] | 1316   | No | NA | 0  | 0            | Low-quality     | Genome-fragment | 2.92  | 0 |
| S2-final-viral-combined_k141_30630   | [full]   | 1316   | No | NA | 0  | 0            | Low-quality     | Genome-fragment | 3.36  | 0 |
| S1-final-viral-combined_k141_153716  | [full]   | 1504   | No | NA | 0  | 0            | Not-determined  | Genome-fragment | NA    | 0 |
| S1-final-viral-combined_k141_87808   | [full]   | 2527   | No | NA | 0  | 0            | Not-determined  | Genome-fragment | NA    | 0 |
| S9-final-viral-combined_k141_71354   | [full]   | 1317   | No | NA | 0  | 1            | Low-quality     | Genome-fragment | 1.08  | 0 |
| S9-final-viral-combined_k141_512860  | [full]   | 1317   | No | NA | 0  | 0            | Low-quality     | Genome-fragment | 3.8   | 0 |
| S1-final-viral-combined_k141_351941  | [full]   | 2048   | No | NA | 0  | 1            | Not-determined  | Genome-fragment | NA    | 0 |
| S11-final-viral-combined_k141_34700  | [full]   | 1317   | No | NA | 0  | 1            | Low-quality     | Genome-fragment | 0.48  | 0 |
| S1-final-viral-combined_k141_169754  | [full]   | 1323   | No | NA | 0  | 0            | Not-determined  | Genome-fragment | NA    | 0 |
| S11-final-viral-combined_k141_66163  | [full]   | 1317   | No | NA | 0  | 0            | Low-quality     | Genome-fragment | 2.33  | 0 |
| S1-final-viral-combined_k141_351948  | [full]   | 1820   | No | NA | 0  | 1            | Not-determined  | Genome-fragment | NA    | 0 |
| S11-final-viral-combined_k141_91892  | [H2gene] | 1317   | No | NA | 1  | 0            | Low-quality     | Genome-fragment | 3.09  | 0 |
| S1-final-viral-combined_k141_5832    | [full]   | 2213   | No | NA | 0  | 2            | Not-determined  | Genome-fragment | NA    | 0 |
| S1-final-viral-combined_k141_169788  | [full]   | 4712   | No | NA | 0  | 0            | Medium-quality  | Genome-fragment | 57.96 | 0 |
| S1-final-viral-combined_k141_351965  | [full]   | 1532   | No | NA | 0  | 1            | Not-determined  | Genome-fragment | NA    | 0 |
| S5-final-viral-combined_k141_56535   | [full]   | 1317   | No | NA | 0  | 1            | Low-quality     | Genome-fragment | 0.53  | 0 |
| S1-final-viral-combined_k141_169801  | [full]   | 3254   | No | NA | 0  | 2            | Not-determined  | Genome-fragment | NA    | 0 |
| S1-final-viral-combined_k141_253248  | [full]   | 2245   | No | NA | 0  | 1            | Not-determined  | Genome-fragment | NA    | 0 |
| S1-final-viral-combined_k141_253254  | [full]   | 4196   | No | NA | 0  | 3            | Not-determined  | Genome-fragment | NA    | 0 |
| S7_k141_24041                        |          | 1317   | No | NA | 0  | 0            | Low-quality     | Genome-fragment | 0.43  | 0 |
| S1-final-viral-combined_k141_153900  | [full]   | 1446   | No | NA | 0  | 1            | Not-determined  | Genome-fragment | NA    | 0 |
| S7_k141_138166                       |          | 1317   | No | NA | 0  | 0            | Low-quality     | Genome-fragment | 1.26  | 0 |
| S17-final-viral-combined_k141_14555  | [full]   | 1317   | No | NA | 0  | 0            | Low-quality     | Genome-fragment | 0.98  | 0 |
| S17-final-viral-combined_k141_92388  | [full]   | 1317   | No | NA | 0  | 1            | Low-quality     | Genome-fragment | 0.43  | 0 |
| S12-final-viral-combined_k141_210535 | [full]   | 1317   | No | NA | 0  | 2            | Low-quality     | Genome-fragment | 1.03  | 0 |
| S1-final-viral-combined_k141_169835  | [full]   | 11792  | No | NA | 0  | 0            | Not-determined  | Genome-fragment | NA    | 0 |
| S12-final-viral-combined_k141_260738 | [full]   | 1317   | No | NA | 0  | 0            | Low-quality     | Genome-fragment | 3.05  | 0 |
| S1-final-viral-combined_k141_236437  | [full]   | 1566   | No | NA | 0  | 1            | Not-determined  | Genome-fragment | NA    | 0 |
| S1-final-viral-combined_k141_87928   | [full]   | 1475   | No | NA | 0  | 0            | Not-determined  | Genome-fragment | NA    | 0 |
| S4-final-viral-combined_k141_36983   | [full]   | 1317   | No | NA | 0  | 0            | Low-quality     | Genome-fragment | 1.38  | 0 |
| S1-final-viral-combined_k141_87929   | [full]   | 2517   | No | NA | 0  | 1            | Not-determined  | Genome-fragment | NA    | 0 |
| S1-final-viral-combined_k141_217034  | [full]   | 1318   | No | NA | 1  | 0            | Low-quality     | Genome-fragment | 1.08  | 0 |
| S1-final-viral-combined_k141_268661  | [full]   | 2728   | No | NA | 0  | 1            | Not-determined  | Genome-fragment | NA    | 0 |
| S1-final-viral-combined_k141_87935   | [full]   | 1821   | No | NA | 0  | 1            | Not-determined  | Genome-fragment | NA    | 0 |
| S1-final-viral-combined_k141_203729  | [full]   | 1510   | No | NA | 0  | 0            | Not-determined  | Genome-fragment | NA    | 0 |
| S1-final-viral-combined_k141_22002   | [full]   | 155946 | No | NA | 20 | High-quality | Genome-fragment | NA              | 100   | 0 |
| S1-final-viral-combined_k141_253316  | [full]   | 3459   | No | NA | 0  | 2            | Not-determined  | Genome-fragment | NA    | 0 |
| S1-final-viral-combined_k141_169852  | [full]   | 3449   | No | NA | 0  | 2            | Not-determined  | Genome-fragment | NA    | 0 |
| S1-final-viral-combined_k141_203746  | [full]   | 2729   | No | NA | 0  | 3            | Not-determined  | Genome-fragment | NA    | 0 |
| S1-final-viral-combined_k141_253319  | [full]   | 2588   | No | NA | 0  | 2            | Not-determined  | Genome-fragment | NA    | 0 |
| S1-final-viral-combined_k141_269073  | [full]   |        |    |    |    |              |                 |                 |       |   |



|                                      |         |      |     |      |   |   |                  |                 |      |       |
|--------------------------------------|---------|------|-----|------|---|---|------------------|-----------------|------|-------|
| S12-final-viral-combined_k141_137041 | [H2gene | 1319 | No  | NA   | 1 | 0 | Low-quality      | Genome-fragment | 2.76 | 0     |
| S12-final-viral-combined_k141_275260 | [H2gene | 1319 | No  | NA   | 0 | 0 | Low-quality      | Genome-fragment | 2.98 | 0     |
| S1-final-viral-combined_k141_88053   | [Full   | 2156 | No  | NA   | 0 | 0 | Not-determined   | Genome-fragment | NA   | 0     |
| S4-final-viral-combined_k141_114974  | [Full   | 1319 | No  | NA   | 2 | 0 | Low-quality      | Genome-fragment | 2.2  | 0     |
| S6_k141_94898                        |         | 1319 | No  | NA   | 0 | 0 | Low-quality      | Genome-fragment | 0.93 | 0     |
| S1-final-viral-combined_k141_71163   | [Full   | 1368 | No  | NA   | 0 | 1 | Not-determined   | Genome-fragment | NA   | 0     |
| S8_k141_107882                       |         | 1319 | No  | NA   | 0 | 0 | Low-quality      | Genome-fragment | 2.17 | 0     |
| S1-final-viral-combined_k141_269281  | [Full   | 1014 | No  | NA   | 0 | 1 | Not-determined   | Genome-fragment | NA   | 0     |
| S9-final-viral-combined_k141_46890   | [Full   | 1310 | No  | NA   | 0 | 0 | Low-quality      | Genome-fragment | 1.56 | 0     |
| S1-final-viral-combined_k141_104184  | [Full   | 3411 | No  | NA   | 0 | 1 | Not-determined   | Genome-fragment | NA   | 0     |
| S1-final-viral-combined_k141_134743  | [Full   | 2502 | No  | NA   | 0 | 0 | Not-determined   | Genome-fragment | NA   | 0     |
| S11-final-viral-combined_k141_137501 | [H2gene | 1310 | No  | NA   | 0 | 0 | Low-quality      | Genome-fragment | 1.96 | 0     |
| S1-final-viral-combined_k141_154040  | [Full   | 4254 | No  | NA   | 0 | 1 | Not-determined   | Genome-fragment | NA   | 0     |
| S1-final-viral-combined_k141_22445   | [Full   | 3909 | No  | NA   | 0 | 1 | Not-determined   | Genome-fragment | NA   | 0     |
| S1-final-viral-combined_k141_253629  | [Full   | 2093 | No  | NA   | 0 | 1 | Not-determined   | Genome-fragment | NA   | 0     |
| S1-final-viral-combined_k141_286670  | [Full   | 1951 | No  | NA   | 0 | 2 | Not-determined   | Genome-fragment | NA   | 0     |
| S1-final-viral-combined_k141_253642  | [Full   | 1489 | No  | NA   | 0 | 2 | Not-determined   | Genome-fragment | NA   | 0     |
| S1_k141_291681                       |         | 1320 | No  | NA   | 1 | 0 | Low-quality      | Genome-fragment | 2.26 | 0     |
| S2-final-viral-combined_k141_59265   | [H2gene | 1320 | No  | NA   | 1 | 0 | Low-quality      | Genome-fragment | 2.6  | 0     |
| S1-final-viral-combined_k141_352329  | [Full   | 1448 | No  | NA   | 0 | 1 | Not-determined   | Genome-fragment | NA   | 0     |
| S7-final-viral-combined_k141_134296  | [Full   | 1320 | No  | NA   | 0 | 0 | Low-quality      | Genome-fragment | 3.15 | 0     |
| S1-final-viral-combined_k141_254151  | [Full   | 2804 | No  | NA   | 0 | 2 | Not-determined   | Genome-fragment | NA   | 0     |
| S7-final-viral-combined_k141_155553  | [H2gene | 1320 | No  | NA   | 1 | 0 | Low-quality      | Genome-fragment | 2.78 | 0     |
| S17-final-viral-combined_k141_222413 | [H2gene | 1320 | No  | NA   | 1 | 0 | Low-quality      | Genome-fragment | 2.92 | 0     |
| S12-final-viral-combined_k141_138323 | [Full   | 1320 | No  | NA   | 0 | 0 | Low-quality      | Genome-fragment | 2.03 | 0     |
| S1-final-viral-combined_k141_1518    | [Full   | 1751 | No  | NA   | 0 | 2 | Not-determined   | Genome-fragment | NA   | 0     |
| S1-final-viral-combined_k141_154109  | [Full   | 2476 | No  | NA   | 0 | 0 | Not-determined   | Genome-fragment | NA   | 0     |
| S1-final-viral-combined_k141_152721  | [Full   | 2414 | No  | NA   | 0 | 2 | Not-determined   | Genome-fragment | NA   | 0     |
| S8-final-viral-combined_k141_105590  | [Full   | 1320 | No  | NA   | 0 | 0 | Low-quality      | Genome-fragment | 0.45 | 0     |
| S1-final-viral-combined_k141_204097  | [Full   | 1027 | No  | NA   | 0 | 0 | Not-determined   | Genome-fragment | NA   | 0     |
| S1-final-viral-combined_k141_154138  | [Full   | 6770 | No  | NA   | 0 | 4 | Not-determined   | Genome-fragment | NA   | 0     |
| S1-final-viral-combined_k141_882289  | [Full   | 2599 | No  | NA   | 0 | 0 | Not-determined   | Genome-fragment | NA   | 0     |
| S11-final-viral-combined_k141_171872 | [Full   | 1321 | No  | NA   | 0 | 1 | Low-quality      | Genome-fragment | 1.55 | 0     |
| S1-final-viral-combined_k141_170125  | [Full   | 2362 | No  | NA   | 0 | 3 | Not-determined   | Genome-fragment | NA   | 0     |
| S11_k141_151219                      |         | 1321 | No  | NA   | 0 | 1 | Low-quality      | Genome-fragment | 0.36 | 0     |
| S1-final-viral-combined_k141_147072  | [Full   | 1321 | No  | NA   | 0 | 0 | Low-quality      | Genome-fragment | 3.06 | 0     |
| S1-final-viral-combined_k141_187867  | [Full   | 1373 | No  | NA   | 0 | 2 | Not-determined   | Genome-fragment | NA   | 0     |
| S1-final-viral-combined_k141_134500  | [Full   | 1360 | No  | NA   | 0 | 1 | Not-determined   | Genome-fragment | NA   | 0     |
| S1-final-viral-combined_k141_71304   | [Full   | 3044 | No  | NA   | 0 | 1 | Not-determined   | Genome-fragment | NA   | 0     |
| S5-final-viral-combined_k141_56100   | [Full   | 1321 | No  | NA   | 1 | 0 | Low-quality      | Genome-fragment | 3.42 | 0     |
| S12-final-viral-combined_k141_293130 | [Full   | 1321 | No  | NA   | 0 | 0 | Low-quality      | Genome-fragment | 2.2  | 0     |
| S12_k141_266528                      |         | 1321 | No  | NA   | 0 | 1 | Low-quality      | Genome-fragment | 0.25 | 0     |
| S1-final-viral-combined_k141_236738  | [Full   | 1035 | No  | NA   | 0 | 0 | Not-determined   | Genome-fragment | NA   | 0     |
| S2_k141_1430                         |         | 1321 | No  | NA   | 1 | 0 | Low-quality      | Genome-fragment | 3.19 | 0     |
| S1-final-viral-combined_k141_71342   | [Full   | 1080 | No  | NA   | 0 | 0 | Not-determined   | Genome-fragment | NA   | 0     |
| S4_k141_62876                        |         | 1321 | No  | NA   | 0 | 0 | Low-quality      | Genome-fragment | 2.58 | 0     |
| S1-final-viral-combined_k141_269442  | [Full   | 2346 | No  | NA   | 0 | 2 | Not-determined   | Genome-fragment | NA   | 0     |
| S1-final-viral-combined_k141_1541    | [Full   | 1168 | No  | NA   | 0 | 1 | Not-determined   | Genome-fragment | NA   | 0     |
| S1-final-viral-combined_k141_71348   | [Full   | 6200 | No  | NA   | 0 | 0 | Not-determined   | Genome-fragment | NA   | 0     |
| S6-final-viral-combined_k141_71271   | [Full   | 1321 | No  | NA   | 1 | 0 | Low-quality      | Genome-fragment | 4.44 | 0     |
| S11-final-viral-combined_k141_71280  | [Full   | 1322 | No  | NA   | 0 | 1 | Low-quality      | Genome-fragment | 1.96 | 0     |
| S1-final-viral-combined_k141_234958  | [Full   | 2347 | No  | NA   | 0 | 2 | Not-determined   | Genome-fragment | NA   | 0     |
| S1-final-viral-combined_k141_6287    | [Full   | 2265 | No  | NA   | 0 | 2 | Not-determined   | Genome-fragment | NA   | 0     |
| S11-final-viral-combined_k141_161250 | [Full   | 1322 | No  | NA   | 0 | 0 | Low-quality      | Genome-fragment | 1.92 | 0     |
| S1-final-viral-combined_k141_268164  | [Full   | 5465 | No  | NA   | 0 | 0 | Not-determined   | Genome-fragment | NA   | 0     |
| S11-final-viral-combined_k141_320871 | [H2gene | 1322 | No  | NA   | 2 | 0 | Low-quality      | Genome-fragment | 1.88 | 0     |
| S1-final-viral-combined_k141_138381  | [Full   | 1960 | No  | NA   | 0 | 2 | Not-determined   | Genome-fragment | NA   | 0     |
| S11_k141_249518                      |         | 1322 | No  | NA   | 0 | 0 | Low-quality      | Genome-fragment | 2.64 | 0     |
| S1-final-viral-combined_k141_241671  | [H2gene | 1322 | No  | NA   | 0 | 0 | Low-quality      | Genome-fragment | 2.16 | 0     |
| S1-final-viral-combined_k141_88337   | [Full   | 2282 | No  | NA   | 0 | 0 | Not-determined   | Genome-fragment | NA   | 0     |
| S1-final-viral-combined_k141_138393  | [Full   | 3534 | No  | NA   | 0 | 0 | Not-determined   | Genome-fragment | NA   | 0     |
| S7-final-viral-combined_k141_205839  | [Full   | 1322 | No  | NA   | 0 | 2 | Low-quality      | Genome-fragment | 0.78 | 0     |
| S1-final-viral-combined_k141_88380   | [Full   | 1579 | No  | NA   | 0 | 1 | Not-determined   | Genome-fragment | NA   | 0     |
| S17-final-viral-combined_k141_239966 | [Full   | 1322 | No  | NA   | 0 | 0 | Low-quality      | Genome-fragment | 2.37 | 0     |
| S1-final-viral-combined_k141_204228  | [Full   | 3133 | No  | NA   | 0 | 0 | Not-determined   | Genome-fragment | NA   | 0     |
| S4-final-viral-combined_k141_80025   | [Full   | 1322 | No  | NA   | 2 | 0 | Low-quality      | Genome-fragment | 2.41 | 0     |
| S1-final-viral-combined_k141_71457   | [Full   | 2191 | No  | NA   | 0 | 2 | Not-determined   | Genome-fragment | NA   | 0     |
| S1-final-viral-combined_k141_71467   | [Full   | 1315 | No  | NA   | 0 | 1 | Not-determined   | Genome-fragment | NA   | 0     |
| S1-final-viral-combined_k141_135031  | [Full   | 3609 | No  | NA   | 0 | 0 | Not-determined   | Genome-fragment | NA   | 0     |
| S6-final-viral-combined_k141_27244   | [Full   | 1322 | No  | NA   | 0 | 0 | Low-quality      | Genome-fragment | 2.81 | 0     |
| S9_k141_77050                        |         | 1323 | No  | NA   | 0 | 0 | Low-quality      | Genome-fragment | 2.21 | 0     |
| S1-final-viral-combined_k141_188004  | [Full   | 2313 | No  | NA   | 0 | 1 | Not-determined   | Genome-fragment | NA   | 0     |
| S1-final-viral-combined_k141_269559  | [Full   | 3015 | No  | NA   | 0 | 1 | Not-determined   | Genome-fragment | NA   | 0     |
| S11-final-viral-combined_k141_195284 | [Full   | 1323 | No  | NA   | 1 | 0 | Low-quality      | Genome-fragment | 2.09 | 0     |
| S5-final-viral-combined_k141_71374   | [Full   | 1323 | No  | NA   | 0 | 0 | Low-quality      | Genome-fragment | 1.18 | 0     |
| S1-final-viral-combined_k141_319772  | [Full   | 2371 | No  | NA   | 0 | 3 | Not-determined   | Genome-fragment | NA   | 0     |
| S1-final-viral-combined_k141_185001  | [Full   | 3902 | No  | NA   | 0 | 0 | Not-determined   | Genome-fragment | NA   | 0     |
| S1-final-viral-combined_k141_253948  | [Full   | 1905 | No  | NA   | 0 | 1 | Not-determined   | Genome-fragment | NA   | 0     |
| S5-final-viral-combined_k141_200211  | [Full   | 1323 | No  | NA   | 0 | 0 | Low-quality      | Genome-fragment | 2.97 | 0     |
| S1-final-viral-combined_k141_236949  | [Full   | 2730 | No  | NA   | 0 | 0 | Not-determined   | Genome-fragment | NA   | 0     |
| S7-final-viral-combined_k141_164830  | [Full   | 1323 | No  | NA   | 0 | 1 | Low-quality      | Genome-fragment | 2.27 | 0     |
| S12-final-viral-combined_k141_314404 | [H2gene | 1323 | No  | NA   | 0 | 0 | Low-quality      | Genome-fragment | 0.72 | 0     |
| S1-final-viral-combined_k141_236957  | [Full   | 3898 | No  | NA   | 1 | 0 | 3 Not-determined | Genome-fragment | NA   | 0     |
| S12-final-viral-combined_k141_335182 | [H2gene | 1323 | No  | NA   | 1 | 0 | Low-quality      | Genome-fragment | 0.91 | 0     |
| S1-final-viral-combined_k141_204266  | [Full   | 1205 | No  | NA   | 0 | 2 | Not-determined   | Genome-fragment | NA   | 0     |
| S1-final-viral-combined_k141_236972  | [Full   | 1777 | No  | NA   | 0 | 0 | Not-determined   | Genome-fragment | NA   | 0     |
| S17-final-viral-combined_k141_30320  | [Full   | 1324 | No  | NA   | 0 | 0 | Low-quality      | Genome-fragment | 2.73 | 0     |
| S1-final-viral-combined_k141_236987  | [Full   | 3461 | No  | NA   | 0 | 1 | Not-determined   | Genome-fragment | NA   | 0     |
| S1-final-viral-combined_k141_269581  | [Full   | 3561 | No  | NA   | 0 | 0 | Not-determined   | Genome-fragment | NA   | 0     |
| S12-final-viral-combined_k141_203407 | [Full   | 1324 | No  | NA   | 0 | 0 | Low-quality      | Genome-fragment | 1.25 | 0     |
| S1-final-viral-combined_k141_193441  | [Full   | 1041 | No  | NA   | 0 | 0 | Not-determined   | Genome-fragment | NA   | 0     |
| S1-final-viral-combined_k141_168329  | [Full   | 1188 | No  | NA   | 0 | 0 | Not-determined   | Genome-fragment | NA   | 0     |
| S1-final-viral-combined_k141_286280  | [Full   | 2694 | No  | NA   | 0 | 0 | Not-determined   | Genome-fragment | NA   | 0     |
| S1-final-viral-combined_k141_22802   | [Full   | 1482 | No  | NA   | 0 | 1 | Not-determined   | Genome-fragment | NA   | 0     |
| S1-final-viral-combined_k141_122415  | [Full   | 3573 | No  | NA   | 0 | 2 | Not-determined   | Genome-fragment | NA   | 0     |
| S12_k141_398855                      |         | 1324 | No  | NA   | 0 | 2 | Low-quality      | Genome-fragment | 0.9  | 0     |
| S1-final-viral-combined_k141_557161  | [Full   | 2494 | No  | NA   | 0 | 0 | Not-determined   | Genome-fragment | NA   | 0     |
| S1-final-viral-combined_k141_269609  | [Full   | 1403 | No  | NA   | 0 | 2 | Not-determined   | Genome-fragment | NA   | 0     |
| S1-final-viral-combined_k141_220461  | [Full   | 1161 | No  | NA   | 0 | 0 | Not-determined   | Genome-fragment | NA   | 0     |
| S12-final-viral-combined_k141_42847  | [Full   | 1324 | No  | NA   | 0 | 0 | Low-quality      | Genome-fragment | 3.7  | 0     |
| S1-final-viral-combined_k141_220467  | [Full   | 1491 | No  | NA   | 0 | 0 | Not-determined   | Genome-fragment | NA   | 0     |
| S1-final-viral-combined_k141_269614  | [Full   | 3884 | No  | NA   | 0 | 0 | Not-determined   | Genome-fragment | NA   | 0     |
| S2_k141_55909                        |         | 1324 | No  | NA   | 0 | 0 | Low-quality      | Genome-fragment | 2.13 | 0     |
| S1-final-viral-combined_k141_204444  | [Full   | 3789 | No  | NA   | 0 | 3 | Not-determined   | Genome-fragment | NA   | 0     |
| S1-final-viral-combined_k141_65161   | [Full   | 3905 | No  | NA   | 0 | 1 | Not-determined   | Genome-fragment | NA   | 0     |
| S1-final-viral-combined_k141_237077  | [Full   | 3517 | No  | NA   | 0 | 2 | Not-determined   | Genome-fragment | NA   | 0     |
| S4-final-viral-combined_k141_193550  | [Full   | 1324 | No  | NA   | 0 | 1 | Low-quality      | Genome-fragment | 2.5  | 0     |
| S11-final-viral-combined_k141_216036 | [Full   | 1325 | No  | NA   | 3 | 0 | Low-quality      | Genome-fragment | 6.25 | 0     |
| S1-final-viral-combined_k141_157677  | [Full   | 1984 | No  | NA   | 0 | 0 | Not-determined   | Genome-fragment | NA   | 0     |
| S1-final-viral-combined_k141_4446    | [Full   | 1325 | No  | NA   | 0 | 0 | Low-quality      | Genome-fragment | 0.62 | 0     |
| S1-final-viral-combined_k141_154436  | [Full   | 1325 | No  | NA   | 1 | 0 | Low-quality      | Genome-fragment | 2.37 | 0     |
| S1_k141_231268                       |         | 1325 | No  | NA   | 0 | 0 | Low-quality      | Genome-fragment | 2.92 | 0     |
| S1-final-viral-combined_k141_6542    | [Full   | 1314 | No  | NA   | 0 | 0 | Not-determined   | Genome-fragment | NA   | 0     |
| S1-final-viral-combined_k141_119959  | [Full   | 1412 | No  | NA   | 0 | 1 | Not-determined   | Genome-fragment | NA   | 0     |
| S2_k141_97273                        |         | 1325 | No  | NA   | 1 | 0 | Low-quality      | Genome-fragment | 0.61 | 0     |
| S1-final-viral-combined_k141_55824   | [Full   | 1234 | No  | NA   | 0 | 1 | Not-determined   | Genome-fragment | NA   | 0     |
| S1-final-viral-combined_k141_71645   | [Full   | 1476 | No  | NA   | 0 | 0 | Not-determined   | Genome-fragment | NA   | 0     |
| S5-final-viral-combined_k141_129521  | [Full   | 1325 | No  | NA   | 0 | 0 | Low-quality      | Genome-fragment | 1.73 | 0     |
| S17_k141_364207                      |         | 1325 | No  | NA   | 1 | 0 | Low-quality      | Genome-fragment | 1.95 | 0     |
| S4-final-viral-combined_k141_69730   | [Full   | 1325 | No  | NA   | 0 | 0 | Low-quality      | Genome-fragment | 0.77 | 0     |
| S1-final-viral-combined_k141_219988  | [Full   | 2929 | No  | NA   | 0 | 2 | Not-determined   | Genome-fragment | NA   | 0     |
| S1-final-viral-combined_k141_294451  | [Full   | 2406 | No  | NA   | 0 | 2 | Not-determined   | Genome-fragment | NA   | 0     |
| S1-final-viral-combined_k141_237175  | [Full   | 3330 | No  | NA   | 0 | 4 | Not-determined   | Genome-fragment | NA   | 0     |
| S4-final-viral-combined_k141_55369   | [Full   | 1325 | Yes | NA   | 1 | 1 | Low-quality      | Genome-fragment | 0.42 | 20.53 |
| S1-final-viral-combined_k141_279300  | [H2gene | 1326 | No  | 1053 | 1 | 0 | Low-quality      | Genome-fragment | 0.29 | 0     |
| S1-final-viral-combined_k141_154423  | [Full   | 3502 | No  | NA   | 0 | 0 | Not-determined   | Genome-fragment | NA   | 0     |
| S12-final-viral-combined_k141_173211 | [Full   | 1326 | No  | NA   | 0 | 0 | Low-quality      | Genome-fragment | 2.81 | 0     |
| S1-final-viral-combined_k141_385327  | [Full   | 1122 | No  | NA   | 0 | 0 | Not-determined   | Genome-fragment | NA   | 0     |
| S12-final-viral-combined_k141_6284   | [Full   | 1326 | No  | NA   | 0 | 0 | Low-quality      | Genome-fragment | 1.61 | 0     |
| S1-final-viral-combined_k141_335205  | [Full   | 1369 | No  | NA   | 0 | 0 | Not-determined   | Genome-fragment | NA   | 0     |



|                                      |       |     |    |       |    |                |                 |                 |      |       |
|--------------------------------------|-------|-----|----|-------|----|----------------|-----------------|-----------------|------|-------|
| S8_k141_271                          | 1327  | No  | NA | 0     | 0  | Low-quality    | Genome-fragment | 2.15            | 0    |       |
| S1-final-viral-combined_k141_170521  | 2425  | NA  | NA | 0     | 1  | Not-determined | Genome-fragment | NA              | 0    |       |
| S9-final-viral-combined_k141_18028   | 1328  | No  | NA | 1     | 0  | Low-quality    | Genome-fragment | 2.89            | 0    |       |
| S1-final-viral-combined_k141_170529  | 6376  | No  | NA | 0     | 4  | Not-determined | Genome-fragment | NA              | 0    |       |
| S1-final-viral-combined_k141_22077   | 1798  | No  | NA | 0     | 1  | Not-determined | Genome-fragment | NA              | 0    |       |
| S1-final-viral-combined_k141_104745  | 2863  | No  | NA | 0     | 2  | Not-determined | Genome-fragment | NA              | 0    |       |
| S11-final-viral-combined_k141_172357 | 1328  | No  | NA | 0     | 0  | Low-quality    | Genome-fragment | 1.77            | 0    |       |
| S1-final-viral-combined_k141_170552  | 7229  | No  | NA | 0     | 0  | Not-determined | Genome-fragment | NA              | 0    |       |
| S11-final-viral-combined_k141_254981 | 1328  | No  | NA | 0     | 0  | Low-quality    | Genome-fragment | 1.17            | 0    |       |
| S1-final-viral-combined_k141_368653  | 1596  | No  | NA | 0     | 0  | Not-determined | Genome-fragment | NA              | 0    |       |
| S11_k141_256167                      | 1328  | No  | NA | 1     | 0  | Low-quality    | Genome-fragment | 1.53            | 0    |       |
| S1-final-viral-combined_k141_56006   | 1840  | No  | NA | 0     | 1  | Not-determined | Genome-fragment | NA              | 0    |       |
| S1-final-viral-combined_k141_56014   | 1565  | No  | NA | 0     | 2  | Not-determined | Genome-fragment | NA              | 0    |       |
| S3-final-viral-combined_k141_134054  | 1328  | No  | NA | 0     | 0  | Low-quality    | Genome-fragment | 3.43            | 0    |       |
| S1-final-viral-combined_k141_122761  | 9263  | No  | NA | 0     | 5  | Not-determined | Genome-fragment | NA              | 0    |       |
| S1-final-viral-combined_k141_254515  | 1057  | No  | NA | 0     | 1  | Not-determined | Genome-fragment | NA              | 0    |       |
| S7-final-viral-combined_k141_77223   | 1328  | No  | NA | 0     | 1  | Low-quality    | Genome-fragment | 0.73            | 0    |       |
| S12-final-viral-combined_k141_40553  | 1328  | No  | NA | 1     | 0  | Low-quality    | Genome-fragment | 3.84            | 0    |       |
| S1-final-viral-combined_k141_56009   | 2100  | No  | NA | 0     | 1  | Not-determined | Genome-fragment | NA              | 0    |       |
| S12-final-viral-combined_k141_394747 | 1328  | No  | NA | 0     | 0  | Low-quality    | Genome-fragment | 2.57            | 0    |       |
| S1-final-viral-combined_k141_88955   | 1795  | No  | NA | 0     | 0  | Not-determined | Genome-fragment | NA              | 0    |       |
| S2-final-viral-combined_k141_132507  | 1328  | No  | NA | 0     | 1  | Low-quality    | Genome-fragment | 1.09            | 0    |       |
| S11-final-viral-combined_k141_269216 | 1329  | No  | NA | 0     | 1  | Low-quality    | Genome-fragment | 2.62            | 0    |       |
| S1-final-viral-combined_k141_220828  | 1551  | No  | NA | 0     | 1  | Not-determined | Genome-fragment | NA              | 0    |       |
| S11_k141_225105                      | 1329  | No  | NA | 0     | 1  | Low-quality    | Genome-fragment | 2.17            | 0    |       |
| S1-final-viral-combined_k141_39616   | 1852  | No  | NA | 0     | 1  | Not-determined | Genome-fragment | NA              | 0    |       |
| S1-final-viral-combined_k141_320324  | 2336  | No  | NA | 0     | 3  | Not-determined | Genome-fragment | NA              | 0    |       |
| S1-final-viral-combined_k141_181133  | 1329  | No  | NA | 0     | 2  | Low-quality    | Genome-fragment | 1               | 0    |       |
| S1-final-viral-combined_k141_353130  | 2736  | No  | NA | 0     | 1  | Not-determined | Genome-fragment | NA              | 0    |       |
| S1-final-viral-combined_k141_320339  | 1584  | No  | NA | 0     | 1  | Not-determined | Genome-fragment | NA              | 0    |       |
| S1-final-viral-combined_k141_39641   | 4304  | No  | NA | 0     | 3  | Not-determined | Genome-fragment | NA              | 0    |       |
| S1-final-viral-combined_k141_353591  | 1329  | No  | NA | 0     | 0  | Low-quality    | Genome-fragment | 3.08            | 0    |       |
| S1-final-viral-combined_k141_220843  | 2294  | No  | NA | 0     | 0  | Not-determined | Genome-fragment | NA              | 0    |       |
| S3_k141_3140                         | 1329  | No  | NA | 0     | 0  | Low-quality    | Genome-fragment | 3.28            | 0    |       |
| S5-final-viral-combined_k141_85001   | 1329  | No  | NA | 0     | 0  | Low-quality    | Genome-fragment | 1.13            | 0    |       |
| S5-final-viral-combined_k141_43874   | 1329  | No  | NA | 0     | 2  | Low-quality    | Genome-fragment | 3.95            | 0    |       |
| S1-final-viral-combined_k141_56158   | 3130  | No  | NA | 0     | 1  | Not-determined | Genome-fragment | NA              | 0    |       |
| S1-final-viral-combined_k141_138938  | 3370  | No  | NA | 0     | 1  | Not-determined | Genome-fragment | NA              | 0    |       |
| S1-final-viral-combined_k141_68804   | 2517  | No  | NA | 0     | 2  | Not-determined | Genome-fragment | NA              | 0    |       |
| S1-final-viral-combined_k141_368751  | 4795  | No  | NA | 0     | 1  | Not-determined | Genome-fragment | NA              | 0    |       |
| S2_k141_134693                       | 1329  | No  | NA | 0     | 1  | Low-quality    | Genome-fragment | 3.52            | 0    |       |
| S1-final-viral-combined_k141_335455  | 4119  | No  | NA | 0     | 2  | Not-determined | Genome-fragment | NA              | 0    |       |
| S8_k141_127274                       | 1329  | No  | NA | 0     | 1  | Low-quality    | Genome-fragment | 2.6             | 0    |       |
| S7-final-viral-combined_k141_140089  | 1330  | No  | NA | 1     | 0  | Low-quality    | Genome-fragment | 2.58            | 0    |       |
| S7_k141_197583                       | 1330  | No  | NA | 0     | 2  | Low-quality    | Genome-fragment | 0.3             | 0    |       |
| S1-final-viral-combined_k141_353148  | 8373  | No  | NA | 0     | 1  | Not-determined | Genome-fragment | NA              | 0    |       |
| S1-final-viral-combined_k141_188439  | 1975  | No  | NA | 0     | 1  | Not-determined | Genome-fragment | NA              | 0    |       |
| S1-final-viral-combined_k141_203880  | 1647  | No  | NA | 0     | 2  | Not-determined | Genome-fragment | NA              | 0    |       |
| S1-final-viral-combined_k141_154710  | 1716  | No  | NA | 0     | 2  | Not-determined | Genome-fragment | NA              | 0    |       |
| S1-final-viral-combined_k141_88984   | 2221  | No  | NA | 0     | 2  | Not-determined | Genome-fragment | NA              | 0    |       |
| S7_k141_122529                       | 1330  | No  | NA | 0     | 1  | Low-quality    | Genome-fragment | 2.64            | 0    |       |
| S1-final-viral-combined_k141_188475  | 2154  | No  | NA | 0     | 0  | Not-determined | Genome-fragment | NA              | 0    |       |
| S1-final-viral-combined_k141_286614  | 3265  | No  | NA | 0     | 0  | Not-determined | Genome-fragment | NA              | 0    |       |
| S17-final-viral-combined_k141_114252 | 1330  | No  | NA | 1     | 0  | Low-quality    | Genome-fragment | 3.88            | 0    |       |
| S12-final-viral-combined_k141_51789  | 1330  | No  | NA | 0     | 0  | Low-quality    | Genome-fragment | 2.56            | 0    |       |
| S2-final-viral-combined_k141_110530  | 1330  | No  | NA | 0     | 0  | Low-quality    | Genome-fragment | 3.63            | 0    |       |
| S6_k141_52926                        | 1330  | No  | NA | 1     | 0  | Low-quality    | Genome-fragment | 1.06            | 0    |       |
| S1-final-viral-combined_k141_23248   | 83257 | Yes | NA | 29089 | 23 | 35             | Complete        | High-quality    | 100  | 65.06 |
| S1-final-viral-combined_k141_139011  | 1462  | No  | NA | 0     | 1  | Not-determined | Genome-fragment | NA              | 0    |       |
| S1-final-viral-combined_k141_204943  | 1817  | No  | NA | 0     | 1  | Not-determined | Genome-fragment | NA              | 0    |       |
| S1-final-viral-combined_k141_188509  | 3297  | No  | NA | 0     | 2  | Not-determined | Genome-fragment | NA              | 0    |       |
| S6_k141_20299                        | 1330  | No  | NA | 0     | 0  | Low-quality    | Genome-fragment | 1.5             | 0    |       |
| S1-final-viral-combined_k141_102768  | 1331  | No  | NA | 0     | 0  | Low-quality    | Genome-fragment | 2.18            | 0    |       |
| S1-final-viral-combined_k141_335515  | 1905  | No  | NA | 0     | 0  | Not-determined | Genome-fragment | NA              | 0    |       |
| S1-final-viral-combined_k141_303920  | 3706  | No  | NA | 0     | 2  | Not-determined | Genome-fragment | NA              | 0    |       |
| S1-final-viral-combined_k141_324904  | 1331  | No  | NA | 0     | 0  | Low-quality    | Genome-fragment | 4.04            | 0    |       |
| S1-final-viral-combined_k141_62540   | 1331  | No  | NA | 1     | 0  | Low-quality    | Genome-fragment | 3.04            | 0    |       |
| S1-final-viral-combined_k141_286676  | 1902  | No  | NA | 0     | 0  | Not-determined | Genome-fragment | NA              | 0    |       |
| S1-final-viral-combined_k141_154779  | 2656  | No  | NA | 0     | 0  | Not-determined | Genome-fragment | NA              | 0    |       |
| S3-final-viral-combined_k141_121393  | 1331  | No  | NA | 0     | 0  | Low-quality    | Genome-fragment | 1.87            | 0    |       |
| S7-final-viral-combined_k141_196516  | 1331  | No  | NA | 0     | 0  | Low-quality    | Genome-fragment | 0.82            | 0    |       |
| S17-final-viral-combined_k141_111541 | 1331  | No  | NA | 0     | 0  | Low-quality    | Genome-fragment | 2.7             | 0    |       |
| S1-final-viral-combined_k141_188545  | 10480 | No  | NA | 0     | 7  | Not-determined | Genome-fragment | NA              | 0    |       |
| S1-final-viral-combined_k141_353246  | 1788  | No  | NA | 0     | 1  | Not-determined | Genome-fragment | NA              | 0    |       |
| S1-final-viral-combined_k141_7081    | 3028  | No  | NA | 0     | 2  | Not-determined | Genome-fragment | NA              | 0    |       |
| S1-final-viral-combined_k141_286747  | 1768  | No  | NA | 0     | 1  | Not-determined | Genome-fragment | NA              | 0    |       |
| S1-final-viral-combined_k141_237642  | 15115 | No  | NA | 0     | 11 | Not-determined | Genome-fragment | NA              | 0    |       |
| S1-final-viral-combined_k141_335579  | 2820  | No  | NA | 0     | 2  | Not-determined | Genome-fragment | NA              | 0    |       |
| S1-final-viral-combined_k141_188615  | 1636  | No  | NA | 0     | 0  | Not-determined | Genome-fragment | NA              | 0    |       |
| S1-final-viral-combined_k141_286810  | 1208  | No  | NA | 0     | 0  | Not-determined | Genome-fragment | NA              | 0    |       |
| S1-final-viral-combined_k141_353292  | 1044  | No  | NA | 0     | 0  | Not-determined | Genome-fragment | NA              | 0    |       |
| S1-final-viral-combined_k141_237660  | 1040  | No  | NA | 0     | 0  | Not-determined | Genome-fragment | NA              | 0    |       |
| S1-final-viral-combined_k141_385639  | 4015  | No  | NA | 0     | 3  | Not-determined | Genome-fragment | NA              | 0    |       |
| S17-final-viral-combined_k141_249778 | 1331  | No  | NA | 0     | 0  | Low-quality    | Genome-fragment | 2.27            | 0    |       |
| S1-final-viral-combined_k141_72128   | 1570  | No  | NA | 0     | 2  | Not-determined | Genome-fragment | NA              | 0    |       |
| S1-final-viral-combined_k141_254645  | 2462  | No  | NA | 0     | 3  | Not-determined | Genome-fragment | NA              | 0    |       |
| S8_k141_249435                       | 1331  | No  | NA | 1     | 0  | Low-quality    | Genome-fragment | 1.59            | 0    |       |
| S1-final-viral-combined_k141_254654  | 3063  | No  | NA | 0     | 0  | Not-determined | Genome-fragment | NA              | 0    |       |
| S1-final-viral-combined_k141_188651  | 3245  | No  | NA | 0     | 0  | Not-determined | Genome-fragment | NA              | 0    |       |
| S1-final-viral-combined_k141_254665  | 8648  | No  | NA | 0     | 7  | Not-determined | Genome-fragment | NA              | 0    |       |
| S1-final-viral-combined_k141_72143   | 2209  | No  | NA | 0     | 2  | Not-determined | Genome-fragment | NA              | 0    |       |
| S1-final-viral-combined_k141_72148   | 1751  | No  | NA | 0     | 1  | Not-determined | Genome-fragment | NA              | 0    |       |
| S1-final-viral-combined_k141_237340  | 1332  | Yes | NA | 675   | 1  | 1              | Low-quality     | Genome-fragment | 1.12 | 49.32 |
| S1-final-viral-combined_k141_353336  | 1297  | No  | NA | 0     | 0  | Not-determined | Genome-fragment | NA              | 0    |       |
| S1-final-viral-combined_k141_205050  | 1739  | No  | NA | 0     | 0  | Not-determined | Genome-fragment | NA              | 0    |       |
| S1-final-viral-combined_k141_312413  | 1332  | No  | NA | 0     | 0  | Low-quality    | Genome-fragment | 2.49            | 0    |       |
| S1-final-viral-combined_k141_188697  | 14428 | No  | NA | 0     | 9  | Not-determined | Genome-fragment | NA              | 0    |       |
| S1-final-viral-combined_k141_721677  | 34592 | No  | NA | 13    | 1  | High-quality   | High-quality    | 100             | 0    |       |
| S1_k141_188975                       | 1332  | No  | NA | 0     | 1  | Low-quality    | Genome-fragment | 0.96            | 0    |       |
| S1_k141_241860                       | 1332  | No  | NA | 0     | 0  | Low-quality    | Genome-fragment | 0.94            | 0    |       |
| S1-final-viral-combined_k141_104942  | 7518  | No  | NA | 0     | 4  | Not-determined | Genome-fragment | NA              | 0    |       |
| S1-final-viral-combined_k141_398051  | 1251  | No  | NA | 0     | 2  | Not-determined | Genome-fragment | NA              | 0    |       |
| S1-final-viral-combined_k141_7160    | 2078  | No  | NA | 0     | 2  | Not-determined | Genome-fragment | NA              | 0    |       |
| S5-final-viral-combined_k141_91744   | 1332  | No  | NA | 0     | 0  | Low-quality    | Genome-fragment | 1.42            | 0    |       |
| S5-final-viral-combined_k141_75981   | 1332  | No  | NA | 0     | 0  | Low-quality    | Genome-fragment | 2.68            | 0    |       |
| S1-final-viral-combined_k141_56490   | 1911  | No  | NA | 0     | 1  | Not-determined | Genome-fragment | NA              | 0    |       |
| S1-final-viral-combined_k141_385740  | 1176  | No  | NA | 0     | 0  | Not-determined | Genome-fragment | NA              | 0    |       |
| S5-final-viral-combined_k141_131244  | 1332  | No  | NA | 1     | 0  | Low-quality    | Genome-fragment | 3.19            | 0    |       |
| S1-final-viral-combined_k141_23477   | 1462  | No  | NA | 0     | 2  | Not-determined | Genome-fragment | NA              | 0    |       |
| S1-final-viral-combined_k141_23489   | 1008  | No  | NA | 0     | 1  | Not-determined | Genome-fragment | NA              | 0    |       |
| S5-final-viral-combined_k141_60096   | 1332  | No  | NA | 1     | 0  | Low-quality    | Genome-fragment | 1.73            | 0    |       |
| S17-final-viral-combined_k141_26443  | 1332  | No  | NA | 0     | 0  | Low-quality    | Genome-fragment | 0.83            | 0    |       |
| S12-final-viral-combined_k141_66062  | 1332  | No  | NA | 0     | 1  | Low-quality    | Genome-fragment | 3.34            | 0    |       |
| S1-final-viral-combined_k141_39814   | 4005  | No  | NA | 0     | 4  | Not-determined | Genome-fragment | NA              | 0    |       |
| S1-final-viral-combined_k141_234977  | 1630  | No  | NA | 0     | 0  | Not-determined | Genome-fragment | NA              | 0    |       |
| S1-final-viral-combined_k141_139377  | 11313 | No  | NA | 0     | 9  | Not-determined | Genome-fragment | NA              | 0    |       |
| S2-final-viral-combined_k141_741519  | 1332  | No  | NA | 0     | 0  | Low-quality    | Genome-fragment | 1.31            | 0    |       |
| S2_k141_129198                       | 1332  | No  | NA | 0     | 0  | Low-quality    | Genome-fragment | 1.4             | 0    |       |
| S4-final-viral-combined_k141_10555   | 1332  | No  | NA | 2     | 0  | Low-quality    | Genome-fragment | 2.91            | 0    |       |
| S4_k141_127944                       | 1332  | No  | NA | 0     | 1  | Low-quality    | Genome-fragment | 0.76            | 0    |       |
| S1-final-viral-combined_k141_39849   | 1612  | No  | NA | 0     | 2  | Not-determined | Genome-fragment | NA              | 0    |       |
| S1-final-viral-combined_k141_205225  | 5252  | No  | NA | 0     | 2  | Not-determined | Genome-fragment | NA              | 0    |       |
| S8-final-viral-combined_k141_269324  | 1332  | No  | NA | 1     | 0  | Low-quality    | Genome-fragment | 2.38            | 0    |       |
| S1-final-viral-combined_k141_72339   | 2731  | No  | NA | 0     | 0  | Not-determined | Genome-fragment | NA              | 0    |       |
| S9-final-viral-combined_k141_17103   | 1332  | No  | NA | 0     | 1  | Low-quality    | Genome-fragment | 2.28            | 0    |       |
| S1-final-viral-combined_k141_155036  | 7408  | No  | NA | 0     | 5  | Not-determined | Genome-fragment | NA              | 0    |       |
| S1-final-viral-combined_k141_23553   | 1214  | No  | NA | 0     | 2  | Not-determined | Genome-fragment | NA              | 0    |       |
| S1-final-viral-combined_k141_171103  | 4032  | No  | NA | 0     | 1  | Not-determined | Genome-fragment | NA              | 0    |       |
| S1-final-viral-combined_k141_64499   | 1333  | No  | NA | 0     | 0  | Low-quality    | Genome-fragment | 3.14            | 0    |       |
| S7-final-viral-combined_k141_83292   | 1333  | No  | NA | 0     | 0  | Low-quality    | Genome-fragment | 1.07            | 0    |       |
| S17-final-viral-combined_k141_47009  | 1333  | Yes | NA | 757   | 1  | 1              | Low-quality     | Genome-fragment | 0.52 | 43.21 |
| S1-final-viral-combined_k141_320968  | 2408  | No  | NA | 0     | 0  | Not-determined | Genome-fragment | NA              | 0    |       |
| S12-final-viral-combined_k141_14311  | 1333  | No  | NA | 0     | 1  | Low-quality    | Genome-fragment | 2.45            | 0    |       |
| S2-final-viral-combined_k141_231917  | 1333  | No  | NA | 1     | 0  | Low-quality    | Genome-fragment | 1.75            | 0    |       |
| S1-final-viral-combined_k141_39945   | 1218  | No  | NA | 0     | 0  | Not-determined | Genome-fragment | NA              | 0    |       |
| S1-final-viral-combined_k141_335855  | 1963  | No  | NA | 0     | 0  | Not-determined | Genome-fragment | NA              | 0    |       |
| S1-final-viral-combined_k141_304191  | 1531  | No  | NA | 0     | 1  | Not-determined | Genome-fragment | NA              | 0    |       |
| S2_k141_101837                       | 1333  | No  | NA | 0     | 0  | Low-quality    | Genome-fragment | 2.13            | 0    |       |
| S8-final-viral-combined_k141_204738  | 1333  | No  | NA | 0     |    |                |                 |                 |      |       |



|                                      |          |       |     |        |    |    |                |                 |       |       |
|--------------------------------------|----------|-------|-----|--------|----|----|----------------|-----------------|-------|-------|
| S1-final-viral-combined_k141_401151  | [full]   | 2384  | No  | NA     | 1  | 0  | Medium-quality | Genome-fragment | 66.38 | 0     |
| S11-final-viral-combined_k141_329501 | [full]   | 1335  | No  | NA     | 0  | 0  | Low-quality    | Genome-fragment | 2.81  | 0     |
| S1-final-viral-combined_k141_315753  | [H2gene] | 1335  | No  | NA     | 2  | 0  | Low-quality    | Genome-fragment | 3.16  | 0     |
| S1-final-viral-combined_k141_221401  | [full]   | 1458  | No  | NA     | 0  | 2  | Not-determined | Genome-fragment | NA    | 0     |
| S1-final-viral-combined_k141_304343  | [full]   | 1178  | No  | NA     | 0  | 0  | Not-determined | Genome-fragment | NA    | 0     |
| S1-final-viral-combined_k141_287147  | [full]   | 2003  | No  | NA     | 0  | 3  | Not-determined | Genome-fragment | NA    | 0     |
| S1-final-viral-combined_k141_321236  | [full]   | 1456  | No  | NA     | 0  | 0  | Not-determined | Genome-fragment | NA    | 0     |
| S1-final-viral-combined_k141_232561  | [H2gene] | 1335  | No  | NA     | 0  | 0  | Low-quality    | Genome-fragment | 3     | 0     |
| S5-final-viral-combined_k141_246211  | [full]   | 1335  | Yes | 873    | 0  | 1  | Low-quality    | Genome-fragment | 0.99  | 34.61 |
| S12-final-viral-combined_k141_37631  | [full]   | 1335  | No  | NA     | 1  | 0  | Low-quality    | Genome-fragment | 3.09  | 0     |
| S12-final-viral-combined_k141_397033 | [full]   | 1335  | No  | NA     | 0  | 0  | Low-quality    | Genome-fragment | 2.1   | 0     |
| S2-final-viral-combined_k141_121658  | [H2gene] | 1335  | No  | NA     | 1  | 0  | Low-quality    | Genome-fragment | 3.27  | 0     |
| S2_k141_170380                       |          | 1335  | No  | NA     | 0  | 1  | Low-quality    | Genome-fragment | 0.46  | 0     |
| S1-final-viral-combined_k141_270684  | [full]   | 1747  | No  | NA     | 0  | 2  | Not-determined | Genome-fragment | NA    | 0     |
| S1-final-viral-combined_k141_25759   | [full]   | 1745  | No  | NA     | 0  | 3  | Not-determined | Genome-fragment | NA    | 0     |
| S1-final-viral-combined_k141_205530  | [full]   | 23603 | No  | NA     | 0  | 2  | Not-determined | Genome-fragment | NA    | 0     |
| S1-final-viral-combined_k141_238241  | [full]   | 2301  | No  | NA     | 0  | 1  | Not-determined | Genome-fragment | NA    | 0     |
| S1-final-viral-combined_k141_139670  | [full]   | 1552  | No  | NA     | 0  | 1  | Not-determined | Genome-fragment | NA    | 0     |
| S1-final-viral-combined_k141_105305  | [full]   | 1454  | No  | NA     | 0  | 1  | Not-determined | Genome-fragment | NA    | 0     |
| S1-final-viral-combined_k141_270711  | [full]   | 1321  | No  | NA     | 0  | 0  | Not-determined | Genome-fragment | NA    | 0     |
| S4-final-viral-combined_k141_50123   | [full]   | 1335  | No  | NA     | 0  | 0  | Low-quality    | Genome-fragment | 0.56  | 0     |
| S8_k141_245075                       |          | 1335  | No  | NA     | 0  | 2  | Low-quality    | Genome-fragment | 0.43  | 0     |
| S1-final-viral-combined_k141_40166   | [full]   | 2131  | No  | NA     | 0  | 2  | Not-determined | Genome-fragment | NA    | 0     |
| S1-final-viral-combined_k141_72605   | [full]   | 2239  | No  | NA     | 0  | 0  | Not-determined | Genome-fragment | NA    | 0     |
| S1-final-viral-combined_k141_227156  | [full]   | 1336  | No  | NA     | 0  | 0  | Low-quality    | Genome-fragment | 2.41  | 0     |
| S1-final-viral-combined_k141_23601   | [full]   | 1720  | No  | NA     | 0  | 2  | Not-determined | Genome-fragment | NA    | 0     |
| S1_k141_307378                       |          | 1336  | No  | NA     | 1  | 2  | Low-quality    | Genome-fragment | 3.31  | 0     |
| S1-final-viral-combined_k141_155280  | [full]   | 1423  | No  | NA     | 0  | 1  | Not-determined | Genome-fragment | NA    | 0     |
| S1_k141_274636                       |          | 1336  | No  | NA     | 0  | 0  | Low-quality    | Genome-fragment | 2.92  | 0     |
| S1-final-viral-combined_k141_369324  | [full]   | 2347  | No  | NA     | 0  | 1  | Not-determined | Genome-fragment | NA    | 0     |
| S1_k141_69671                        |          | 1336  | No  | NA     | 0  | 1  | Low-quality    | Genome-fragment | 2.23  | 0     |
| S5-final-viral-combined_k141_102134  | [full]   | 1336  | No  | NA     | 0  | 0  | Low-quality    | Genome-fragment | 2.79  | 0     |
| S7-final-viral-combined_k141_74921   | [full]   | 1336  | No  | NA     | 0  | 0  | Low-quality    | Genome-fragment | 2.47  | 0     |
| S1-final-viral-combined_k141_7602    | [full]   | 3549  | No  | NA     | 0  | 0  | Not-determined | Genome-fragment | NA    | 0     |
| S1-final-viral-combined_k141_40201   | [full]   | 1757  | No  | NA     | 0  | 2  | Not-determined | Genome-fragment | NA    | 0     |
| S1-final-viral-combined_k141_304177  | [full]   | 9521  | Yes | 585.12 | 31 | 29 | Complete       | Genome-fragment | 100   | 38.56 |
| S1-final-viral-combined_k141_89651   | [full]   | 2227  | No  | NA     | 0  | 1  | Not-determined | Genome-fragment | NA    | 0     |
| S1-final-viral-combined_k141_38646   | [full]   | 2689  | No  | NA     | 0  | 2  | Not-determined | Genome-fragment | NA    | 0     |
| S12-final-viral-combined_k141_329447 | [full]   | 1336  | No  | NA     | 0  | 0  | Low-quality    | Genome-fragment | 3.04  | 0     |
| S1-final-viral-combined_k141_321302  | [full]   | 1017  | No  | NA     | 0  | 0  | Not-determined | Genome-fragment | NA    | 0     |
| S1-final-viral-combined_k141_155374  | [full]   | 1284  | No  | NA     | 0  | 1  | Not-determined | Genome-fragment | NA    | 0     |
| S1-final-viral-combined_k141_35373   | [full]   | 35912 | No  | NA     | 11 | 2  | High-quality   | Genome-fragment | 98.88 | 0     |
| S12-final-viral-combined_k141_47760  | [H2gene] | 1336  | No  | NA     | 1  | 0  | Low-quality    | Genome-fragment | 3.76  | 0     |
| S1-final-viral-combined_k141_171395  | [full]   | 2456  | No  | NA     | 0  | 3  | Not-determined | Genome-fragment | NA    | 0     |
| S1-final-viral-combined_k141_221553  | [full]   | 3298  | No  | NA     | 0  | 1  | Not-determined | Genome-fragment | NA    | 0     |
| S1-final-viral-combined_k141_56913   | [full]   | 342.8 | No  | NA     | 0  | 2  | Not-determined | Genome-fragment | NA    | 0     |
| S2-final-viral-combined_k141_4300    | [H2gene] | 1336  | No  | NA     | 1  | 0  | Low-quality    | Genome-fragment | 2.19  | 0     |
| S1-final-viral-combined_k141_72675   | [full]   | 9589  | No  | NA     | 0  | 2  | Not-determined | Genome-fragment | NA    | 0     |
| S4-final-viral-combined_k141_147856  | [full]   | 1336  | No  | NA     | 0  | 0  | Low-quality    | Genome-fragment | 1.07  | 0     |
| S1-final-viral-combined_k141_7669    | [full]   | 3185  | No  | NA     | 0  | 1  | Not-determined | Genome-fragment | NA    | 0     |
| S1-final-viral-combined_k141_386207  | [full]   | 1965  | No  | NA     | 0  | 0  | Not-determined | Genome-fragment | NA    | 0     |
| S8-final-viral-combined_k141_231540  | [full]   | 1336  | No  | NA     | 0  | 2  | Low-quality    | Genome-fragment | 1     | 0     |
| S1-final-viral-combined_k141_321361  | [full]   | 3361  | No  | NA     | 0  | 2  | Not-determined | Genome-fragment | NA    | 0     |
| S11-final-viral-combined_k141_45197  | [full]   | 1337  | No  | NA     | 1  | 0  | Low-quality    | Genome-fragment | 2.64  | 0     |
| S1-final-viral-combined_k141_188182  | [full]   | 1337  | No  | NA     | 0  | 0  | Low-quality    | Genome-fragment | 3     | 0     |
| S1-final-viral-combined_k141_313801  | [full]   | 2219  | No  | NA     | 0  | 1  | Not-determined | Genome-fragment | NA    | 0     |
| S1-final-viral-combined_k141_189195  | [full]   | 2729  | No  | NA     | 0  | 2  | Not-determined | Genome-fragment | NA    | 0     |
| S1_k141_271463                       |          | 1337  | No  | NA     | 0  | 1  | Low-quality    | Genome-fragment | 1.3   | 0     |
| S1-final-viral-combined_k141_23795   | [full]   | 1091  | No  | NA     | 0  | 2  | Not-determined | Genome-fragment | NA    | 0     |
| S1_k141_57521                        |          | 1337  | No  | NA     | 0  | 0  | Low-quality    | Genome-fragment | 3.83  | 0     |
| S5-final-viral-combined_k141_18360   | [full]   | 1337  | No  | NA     | 2  | 0  | Low-quality    | Genome-fragment | 2.86  | 0     |
| S1-final-viral-combined_k141_369407  | [full]   | 3325  | No  | NA     | 0  | 2  | Not-determined | Genome-fragment | NA    | 0     |
| S1-final-viral-combined_k141_287343  | [full]   | 1721  | No  | NA     | 0  | 0  | Not-determined | Genome-fragment | NA    | 0     |
| S17-final-viral-combined_k141_84512  | [full]   | 1337  | No  | NA     | 0  | 1  | Low-quality    | Genome-fragment | 3.59  | 0     |
| S12-final-viral-combined_k141_13815  | [full]   | 1337  | No  | NA     | 0  | 0  | Low-quality    | Genome-fragment | 3.04  | 0     |
| S12-final-viral-combined_k141_317442 | [full]   | 1337  | No  | NA     | 0  | 1  | Low-quality    | Genome-fragment | 0.69  | 0     |
| S1-final-viral-combined_k141_171472  | [full]   | 4811  | No  | NA     | 0  | 1  | Not-determined | Genome-fragment | NA    | 0     |
| S1-final-viral-combined_k141_23829   | [full]   | 4865  | No  | NA     | 0  | 3  | Not-determined | Genome-fragment | NA    | 0     |
| S1-final-viral-combined_k141_89728   | [full]   | 1564  | No  | NA     | 0  | 2  | Not-determined | Genome-fragment | NA    | 0     |
| S6-final-viral-combined_k141_17839   | [full]   | 1337  | No  | NA     | 0  | 0  | Low-quality    | Genome-fragment | 2.82  | 0     |
| S8_k141_3746                         |          | 1337  | No  | NA     | 2  | 0  | Low-quality    | Genome-fragment | 4.16  | 0     |
| S1-final-viral-combined_k141_136087  | [full]   | 2192  | No  | NA     | 0  | 2  | Not-determined | Genome-fragment | NA    | 0     |
| S1-final-viral-combined_k141_221653  | [full]   | 2819  | No  | NA     | 0  | 1  | Not-determined | Genome-fragment | NA    | 0     |
| S9-final-viral-combined_k141_19151   | [H2gene] | 1338  | No  | NA     | 1  | 0  | Low-quality    | Genome-fragment | 3.28  | 0     |
| S11-final-viral-combined_k141_58070  | [full]   | 1338  | No  | NA     | 0  | 1  | Low-quality    | Genome-fragment | 1.4   | 0     |
| S1-final-viral-combined_k141_123715  | [full]   | 1571  | No  | NA     | 0  | 1  | Not-determined | Genome-fragment | NA    | 0     |
| S1-final-viral-combined_k141_221664  | [full]   | 2598  | No  | NA     | 0  | 0  | Not-determined | Genome-fragment | NA    | 0     |
| S1-final-viral-combined_k141_369483  | [full]   | 1669  | No  | NA     | 0  | 0  | Not-determined | Genome-fragment | NA    | 0     |
| S1-final-viral-combined_k141_114600  | [full]   | 1338  | No  | NA     | 0  | 0  | Low-quality    | Genome-fragment | 1.98  | 0     |
| S1-final-viral-combined_k141_287402  | [full]   | 1489  | No  | NA     | 0  | 1  | Not-determined | Genome-fragment | NA    | 0     |
| S7-final-viral-combined_k141_140410  | [full]   | 1338  | No  | NA     | 0  | 0  | Low-quality    | Genome-fragment | 0.84  | 0     |
| S17-final-viral-combined_k141_184913 | [full]   | 1338  | No  | NA     | 0  | 0  | Low-quality    | Genome-fragment | 0.84  | 0     |
| S17-final-viral-combined_k141_173288 | [full]   | 1338  | No  | NA     | 1  | 0  | Low-quality    | Genome-fragment | 3.07  | 0     |
| S1-final-viral-combined_k141_386329  | [full]   | 1899  | No  | NA     | 0  | 0  | Not-determined | Genome-fragment | NA    | 0     |
| S1-final-viral-combined_k141_105566  | [full]   | 3361  | No  | NA     | 0  | 0  | Not-determined | Genome-fragment | NA    | 0     |
| S12-final-viral-combined_k141_177253 | [full]   | 1338  | No  | NA     | 0  | 0  | Low-quality    | Genome-fragment | 4.2   | 0     |
| S2-final-viral-combined_k141_1715    | [full]   | 1338  | No  | NA     | 1  | 0  | Low-quality    | Genome-fragment | 3.18  | 0     |
| S1-final-viral-combined_k141_139808  | [full]   | 1041  | No  | NA     | 0  | 2  | Not-determined | Genome-fragment | NA    | 0     |
| S1-final-viral-combined_k141_139811  | [full]   | 2300  | No  | NA     | 0  | 0  | Not-determined | Genome-fragment | NA    | 0     |
| S2-final-viral-combined_k141_65541   | [full]   | 1338  | No  | NA     | 0  | 0  | Low-quality    | Genome-fragment | 1.74  | 0     |
| S1-final-viral-combined_k141_23926   | [full]   | 1824  | No  | NA     | 0  | 3  | Not-determined | Genome-fragment | NA    | 0     |
| S1-final-viral-combined_k141_169564  | [full]   | 2759  | No  | NA     | 0  | 1  | Not-determined | Genome-fragment | NA    | 0     |
| S1-final-viral-combined_k141_221729  | [full]   | 2369  | No  | NA     | 0  | 1  | Not-determined | Genome-fragment | NA    | 0     |
| S11-final-viral-combined_k141_13202  | [full]   | 1339  | No  | NA     | 0  | 0  | Low-quality    | Genome-fragment | 1.99  | 0     |
| S11-final-viral-combined_k141_126570 | [H2gene] | 1339  | No  | NA     | 0  | 1  | Low-quality    | Genome-fragment | 2.96  | 0     |
| S1-final-viral-combined_k141_23944   | [full]   | 3188  | No  | NA     | 0  | 1  | Not-determined | Genome-fragment | NA    | 0     |
| S1-final-viral-combined_k141_136180  | [full]   | 2886  | No  | NA     | 0  | 2  | Not-determined | Genome-fragment | NA    | 0     |
| S1-final-viral-combined_k141_153978  | [full]   | 7324  | No  | NA     | 0  | 1  | Not-determined | Genome-fragment | NA    | 0     |
| S1-final-viral-combined_k141_109564  | [H2gene] | 1339  | No  | NA     | 0  | 0  | Low-quality    | Genome-fragment | 3.08  | 0     |
| S5_k141_200554                       |          | 1339  | No  | NA     | 0  | 1  | Low-quality    | Genome-fragment | 4.45  | 0     |
| S17-final-viral-combined_k141_129508 | [full]   | 1339  | No  | NA     | 0  | 1  | Low-quality    | Genome-fragment | 2.32  | 0     |
| S1-final-viral-combined_k141_40359   | [full]   | 2516  | No  | NA     | 0  | 1  | Not-determined | Genome-fragment | NA    | 0     |
| S17_k141_87581                       |          | 1339  | No  | NA     | 0  | 1  | Low-quality    | Genome-fragment | 1.71  | 0     |
| S12-final-viral-combined_k141_34491  | [full]   | 1339  | No  | NA     | 0  | 0  | Low-quality    | Genome-fragment | 2.26  | 0     |
| S12-final-viral-combined_k141_365400 | [full]   | 1339  | No  | NA     | 0  | 0  | Low-quality    | Genome-fragment | 1.41  | 0     |
| S2-final-viral-combined_k141_160671  | [full]   | 1339  | No  | NA     | 0  | 0  | Low-quality    | Genome-fragment | 3.52  | 0     |
| S1-final-viral-combined_k141_270983  | [full]   | 5619  | No  | NA     | 0  | 4  | Not-determined | Genome-fragment | NA    | 0     |
| S1-final-viral-combined_k141_72877   | [full]   | 1386  | No  | NA     | 0  | 1  | Not-determined | Genome-fragment | NA    | 0     |
| S1-final-viral-combined_k141_171541  | [full]   | 1652  | No  | NA     | 0  | 1  | Not-determined | Genome-fragment | NA    | 0     |
| S1-final-viral-combined_k141_238300  | [full]   | 1059  | No  | NA     | 0  | 1  | Not-determined | Genome-fragment | NA    | 0     |
| S8-final-viral-combined_k141_59154   | [full]   | 1339  | No  | NA     | 0  | 0  | Low-quality    | Genome-fragment | 0.73  | 0     |
| S9-final-viral-combined_k141_111551  | [full]   | 1340  | No  | NA     | 0  | 1  | Low-quality    | Genome-fragment | 0.25  | 0     |
| S1-final-viral-combined_k141_155544  | [full]   | 2159  | No  | NA     | 0  | 1  | Not-determined | Genome-fragment | NA    | 0     |
| S1-final-viral-combined_k141_386428  | [full]   | 3816  | No  | NA     | 0  | 4  | Not-determined | Genome-fragment | NA    | 0     |
| S1-final-viral-combined_k141_155567  | [full]   | 2202  | No  | NA     | 0  | 1  | Not-determined | Genome-fragment | NA    | 0     |
| S9_k141_81047                        |          | 1340  | No  | NA     | 1  | 0  | Low-quality    | Genome-fragment | 2.85  | 0     |
| S11-final-viral-combined_k141_70008  | [full]   | 1340  | No  | NA     | 0  | 0  | Low-quality    | Genome-fragment | 1.64  | 0     |
| S1-final-viral-combined_k141_254024  | [full]   | 1921  | No  | NA     | 0  | 0  | Not-determined | Genome-fragment | NA    | 0     |
| S11-final-viral-combined_k141_130239 | [full]   | 1340  | No  | NA     | 0  | 0  | Low-quality    | Genome-fragment | 2.39  | 0     |
| S1-final-viral-combined_k141_155602  | [full]   | 1800  | No  | NA     | 0  | 1  | Not-determined | Genome-fragment | NA    | 0     |
| S1-final-viral-combined_k141_238357  | [full]   | 4145  | No  | NA     | 0  | 2  | Not-determined | Genome-fragment | NA    | 0     |
| S11-final-viral-combined_k141_185530 | [full]   | 1340  | No  | NA     | 0  | 2  | Low-quality    | Genome-fragment | 0.84  | 0     |
| S1-final-viral-combined_k141_354048  | [full]   | 2865  | No  | NA     | 0  | 3  | Not-determined | Genome-fragment | NA    | 0     |
| S1-final-viral-combined_k141_189459  | [full]   | 4613  | No  | NA     | 0  | 1  | Not-determined | Genome-fragment | NA    | 0     |
| S11-final-viral-combined_k141_204859 | [full]   | 1340  | No  | NA     | 0  | 0  | Low-quality    | Genome-fragment | 1.6   | 0     |
| S1-final-viral-combined_k141_57147   | [full]   | 10578 | No  | NA     | 1  | 0  | Not-determined | Genome-fragment | NA    | 0     |
| S1-final-viral-combined_k141_306778  | [full]   | 1340  | No  | NA     | 1  | 0  | Low-quality    | Genome-fragment | 1.22  | 0     |
| S1-final-viral-combined_k141_143289  | [full]   | 1340  | No  | NA     | 0  | 0  | Low-quality    | Genome-fragment | 1.17  | 0     |
| S1-final-viral-combined_k141_155639  | [full]   | 1043  | No  | NA     | 0  | 0  | Not-determined | Genome-fragment | NA    | 0     |
| S1-final-viral-combined_k141_62576   | [full]   | 1340  | No  | NA     | 0  | 0  | Low            |                 |       |       |



|                                                |       |     |       |   |   |                |                 |       |       |
|------------------------------------------------|-------|-----|-------|---|---|----------------|-----------------|-------|-------|
| S5-final-viral-combined_k141_199570]] [H2gene  | 1341  | No  | NA    | 1 | 0 | Low-quality    | Genome-fragment | 2.45  | 0     |
| S1-final-viral-combined_k141_169760]] [H2gene  | 1546  | No  | NA    | 1 | 0 | Not-determined | Genome-fragment | NA    | 0     |
| S1-final-viral-combined_k141_304839]] [full    | 1623  | No  | NA    | 0 | 0 | Not-determined | Genome-fragment | NA    | 0     |
| S1-final-viral-combined_k141_24198]] [full     | 2006  | No  | NA    | 0 | 1 | Not-determined | Genome-fragment | NA    | 0     |
| S1-final-viral-combined_k141_7302]] [full      | 1539  | No  | NA    | 0 | 0 | Not-determined | Genome-fragment | NA    | 0     |
| S7-final-viral-combined_k141_136375]] [H2gene  | 1341  | No  | NA    | 2 | 0 | Low-quality    | Genome-fragment | 1.61  | 0     |
| S1-final-viral-combined_k141_38666]] [full     | 3839  | No  | NA    | 0 | 3 | Not-determined | Genome-fragment | NA    | 0     |
| S1-final-viral-combined_k141_136466]] [full    | 4891  | No  | NA    | 0 | 3 | Not-determined | Genome-fragment | NA    | 0     |
| S7-final-viral-combined_k141_202301]] [H2gene  | 1341  | No  | NA    | 0 | 0 | Low-quality    | Genome-fragment | 1.46  | 0     |
| S7-final-viral-combined_k141_193415]] [full    | 1341  | No  | NA    | 1 | 0 | Low-quality    | Genome-fragment | 3.08  | 0     |
| S1-final-viral-combined_k141_169787]] [full    | 2325  | No  | NA    | 0 | 2 | Not-determined | Genome-fragment | NA    | 0     |
| S12-final-viral-combined_k141_26566]] [full    | 1341  | No  | NA    | 0 | 3 | Not-determined | Genome-fragment | 3.25  | 0     |
| S12-final-viral-combined_k141_44914]] [full    | 1341  | No  | NA    | 0 | 2 | Low-quality    | Genome-fragment | 2.32  | 0     |
| S1-final-viral-combined_k141_189692]] [full    | 12207 | No  | NA    | 0 | 6 | Not-determined | Genome-fragment | NA    | 0     |
| S12-final-viral-combined_k141_100021]] [full   | 1341  | No  | NA    | 0 | 0 | Low-quality    | Genome-fragment | 1.8   | 0     |
| S12-final-viral-combined_k141_266806]] [H2gene | 1341  | No  | NA    | 0 | 0 | Low-quality    | Genome-fragment | 1.16  | 0     |
| S1-final-viral-combined_k141_304895]] [full    | 1663  | No  | NA    | 0 | 2 | Not-determined | Genome-fragment | NA    | 0     |
| S12_k141_291068                                | 1341  | No  | NA    | 0 | 1 | Low-quality    | Genome-fragment | 3.8   | 0     |
| S1-final-viral-combined_k141_121851]] [full    | 5585  | No  | NA    | 0 | 2 | Not-determined | Genome-fragment | NA    | 0     |
| S2-final-viral-combined_k141_99389]] [full     | 1341  | No  | NA    | 0 | 1 | Low-quality    | Genome-fragment | 1.05  | 0     |
| S2-final-viral-combined_k141_20537]] [full     | 1341  | No  | NA    | 0 | 0 | Low-quality    | Genome-fragment | 0.92  | 0     |
| S1-final-viral-combined_k141_336541]] [full    | 2578  | No  | NA    | 0 | 1 | Not-determined | Genome-fragment | NA    | 0     |
| S8-final-viral-combined_k141_70024]] [full     | 1341  | No  | NA    | 0 | 0 | Low-quality    | Genome-fragment | 2.1   | 0     |
| S1-final-viral-combined_k141_336555]] [full    | 1012  | No  | NA    | 0 | 0 | Not-determined | Genome-fragment | NA    | 0     |
| S8-final-viral-combined_k141_6327]] [full      | 1342  | No  | NA    | 2 | 0 | Low-quality    | Genome-fragment | 2.27  | 0     |
| S1-final-viral-combined_k141_26681]] [full     | 1342  | No  | NA    | 0 | 0 | Low-quality    | Genome-fragment | 1.52  | 0     |
| S1-final-viral-combined_k141_73131]] [full     | 4383  | No  | NA    | 0 | 3 | Not-determined | Genome-fragment | NA    | 0     |
| S1-final-viral-combined_k141_8201]] [full      | 1576  | No  | NA    | 0 | 0 | Not-determined | Genome-fragment | NA    | 0     |
| S1-final-viral-combined_k141_133871]] [H2gene  | 1342  | No  | NA    | 0 | 0 | Low-quality    | Genome-fragment | 3.65  | 0     |
| S1-final-viral-combined_k141_238680]] [full    | 1760  | No  | NA    | 0 | 1 | Not-determined | Genome-fragment | NA    | 0     |
| S5-final-viral-combined_k141_78157]] [full     | 1342  | No  | NA    | 1 | 0 | Low-quality    | Genome-fragment | 3.03  | 0     |
| S5_k141_68431                                  | 1342  | No  | NA    | 0 | 1 | Low-quality    | Genome-fragment | 3.78  | 0     |
| S1-final-viral-combined_k141_354135]] [full    | 3752  | No  | NA    | 0 | 1 | Not-determined | Genome-fragment | NA    | 0     |
| S1-final-viral-combined_k141_255501]] [full    | 1802  | No  | NA    | 0 | 0 | Not-determined | Genome-fragment | NA    | 0     |
| S1-final-viral-combined_k141_140027]] [full    | 4093  | No  | NA    | 0 | 3 | Not-determined | Genome-fragment | NA    | 0     |
| S7-final-viral-combined_k141_215465]] [full    | 1342  | No  | NA    | 0 | 0 | Low-quality    | Genome-fragment | 3.61  | 0     |
| S1-final-viral-combined_k141_8264]] [full      | 1300  | No  | NA    | 0 | 0 | Not-determined | Genome-fragment | NA    | 0     |
| S1-final-viral-combined_k141_136640]] [full    | 2548  | No  | NA    | 0 | 3 | Not-determined | Genome-fragment | NA    | 0     |
| S7_k141_47522                                  | 1342  | No  | NA    | 0 | 1 | Low-quality    | Genome-fragment | 0.75  | 0     |
| S12-final-viral-combined_k141_262075]] [full   | 1342  | No  | NA    | 0 | 2 | Low-quality    | Genome-fragment | 0.4   | 0     |
| S1-final-viral-combined_k141_189784]] [full    | 1827  | No  | NA    | 0 | 1 | Not-determined | Genome-fragment | NA    | 0     |
| S1-final-viral-combined_k141_255501]] [full    | 2488  | No  | NA    | 0 | 1 | Not-determined | Genome-fragment | NA    | 0     |
| S1-final-viral-combined_k141_271270]] [full    | 1430  | No  | NA    | 0 | 1 | Not-determined | Genome-fragment | NA    | 0     |
| S1-final-viral-combined_k141_189791]] [full    | 1663  | No  | NA    | 0 | 2 | Not-determined | Genome-fragment | NA    | 0     |
| S1-final-viral-combined_k141_28788]] [full     | 2156  | No  | NA    | 0 | 2 | Not-determined | Genome-fragment | NA    | 0     |
| S1-final-viral-combined_k141_30528]] [full     | 2397  | No  | NA    | 0 | 0 | Not-determined | Genome-fragment | NA    | 0     |
| S1-final-viral-combined_k141_124184]] [full    | 4174  | No  | NA    | 0 | 3 | Not-determined | Genome-fragment | NA    | 0     |
| S1-final-viral-combined_k141_38684]] [full     | 1742  | No  | NA    | 0 | 2 | Not-determined | Genome-fragment | NA    | 0     |
| S1-final-viral-combined_k141_271282]] [full    | 1970  | No  | NA    | 0 | 2 | Not-determined | Genome-fragment | NA    | 0     |
| S12-final-viral-combined_k141_199921]] [full   | 1342  | No  | NA    | 0 | 0 | Low-quality    | Genome-fragment | 1.16  | 0     |
| S1-final-viral-combined_k141_287907]] [full    | 1965  | No  | NA    | 0 | 0 | Not-determined | Genome-fragment | NA    | 0     |
| S1-final-viral-combined_k141_8317]] [full      | 4245  | No  | NA    | 0 | 4 | Not-determined | Genome-fragment | NA    | 0     |
| S1-final-viral-combined_k141_140052]] [full    | 1950  | No  | NA    | 0 | 1 | Not-determined | Genome-fragment | NA    | 0     |
| S12-final-viral-combined_k141_231534]] [H2gene | 1342  | No  | NA    | 1 | 0 | Low-quality    | Genome-fragment | 3.17  | 0     |
| S1-final-viral-combined_k141_369976]] [full    | 1070  | No  | NA    | 0 | 0 | Not-determined | Genome-fragment | NA    | 0     |
| S1-final-viral-combined_k141_171841]] [full    | 2828  | No  | NA    | 0 | 0 | Not-determined | Genome-fragment | NA    | 0     |
| S12_k141_306697                                | 1342  | No  | NA    | 0 | 0 | Low-quality    | Genome-fragment | 2.38  | 0     |
| S1-final-viral-combined_k141_25651]] [full     | 1549  | No  | NA    | 0 | 0 | Not-determined | Genome-fragment | NA    | 0     |
| S1-final-viral-combined_k141_189689]] [full    | 3644  | No  | NA    | 0 | 3 | Not-determined | Genome-fragment | NA    | 0     |
| S12_k141_343857                                | 1342  | No  | NA    | 0 | 0 | Low-quality    | Genome-fragment | 0.74  | 0     |
| S2-final-viral-combined_k141_163580]] [full    | 1342  | No  | NA    | 0 | 0 | Low-quality    | Genome-fragment | 3.2   | 0     |
| S1-final-viral-combined_k141_354276]] [full    | 1516  | No  | NA    | 0 | 1 | Not-determined | Genome-fragment | NA    | 0     |
| S2-final-viral-combined_k141_205721]] [full    | 1342  | No  | NA    | 2 | 0 | Low-quality    | Genome-fragment | 2.36  | 0     |
| S1-final-viral-combined_k141_171862]] [full    | 3750  | No  | NA    | 0 | 3 | Not-determined | Genome-fragment | NA    | 0     |
| S8-final-viral-combined_k141_19706]] [full     | 1343  | No  | NA    | 0 | 2 | Low-quality    | Genome-fragment | 1.83  | 0     |
| S1-final-viral-combined_k141_222105]] [full    | 1213  | No  | NA    | 0 | 2 | Not-determined | Genome-fragment | NA    | 0     |
| S1-final-viral-combined_k141_386903]] [full    | 1297  | No  | NA    | 0 | 1 | Not-determined | Genome-fragment | NA    | 0     |
| S11-final-viral-combined_k141_229280]] [full   | 1343  | No  | NA    | 0 | 1 | Low-quality    | Genome-fragment | 2.73  | 0     |
| S11_k141_264131                                | 1343  | No  | NA    | 0 | 0 | Low-quality    | Genome-fragment | 1.01  | 0     |
| S1-final-viral-combined_k141_57370]] [full     | 24795 | Yes | 20871 | 5 | 5 | Medium-quality | Genome-fragment | 59.24 | 15.83 |
| S1-final-viral-combined_k141_262004]] [full    | 1343  | No  | NA    | 0 | 0 | Low-quality    | Genome-fragment | 3.76  | 0     |
| S1-final-viral-combined_k141_171895]] [full    | 6593  | No  | NA    | 0 | 3 | Not-determined | Genome-fragment | NA    | 0     |
| S5-final-viral-combined_k141_171092]] [full    | 1343  | No  | NA    | 0 | 1 | Low-quality    | Genome-fragment | 1.78  | 0     |
| S7-final-viral-combined_k141_169322]] [full    | 1343  | No  | NA    | 0 | 0 | Low-quality    | Genome-fragment | 1.67  | 0     |
| S7-final-viral-combined_k141_179478]] [full    | 1343  | No  | NA    | 0 | 0 | Low-quality    | Genome-fragment | 1.1   | 0     |
| S1-final-viral-combined_k141_370021]] [full    | 2783  | No  | NA    | 0 | 2 | Not-determined | Genome-fragment | NA    | 0     |
| S1-final-viral-combined_k141_271402]] [full    | 1085  | No  | NA    | 0 | 2 | Not-determined | Genome-fragment | NA    | 0     |
| S1-final-viral-combined_k141_24416]] [full     | 2159  | No  | NA    | 0 | 1 | Not-determined | Genome-fragment | NA    | 0     |
| S7_k141_189001                                 | 1343  | No  | NA    | 0 | 0 | Low-quality    | Genome-fragment | 2.69  | 0     |
| S7-final-viral-combined_k141_186608]] [full    | 1343  | No  | NA    | 2 | 0 | Low-quality    | Genome-fragment | 3.58  | 0     |
| S12-final-viral-combined_k141_228650]] [full   | 1343  | No  | NA    | 0 | 0 | Low-quality    | Genome-fragment | 3.51  | 0     |
| S1-final-viral-combined_k141_154586]] [full    | 2092  | No  | NA    | 0 | 1 | Not-determined | Genome-fragment | NA    | 0     |
| S1-final-viral-combined_k141_255737]] [full    | 6452  | No  | NA    | 0 | 2 | Not-determined | Genome-fragment | NA    | 0     |
| S1-final-viral-combined_k141_386975]] [full    | 3555  | No  | NA    | 0 | 3 | Not-determined | Genome-fragment | NA    | 0     |
| S1-final-viral-combined_k141_206281]] [full    | 2467  | No  | NA    | 0 | 1 | Not-determined | Genome-fragment | NA    | 0     |
| S2-final-viral-combined_k141_104611]] [full    | 1343  | No  | NA    | 0 | 0 | Low-quality    | Genome-fragment | 3.7   | 0     |
| S1-final-viral-combined_k141_90307]] [full     | 1128  | No  | NA    | 0 | 0 | Not-determined | Genome-fragment | NA    | 0     |
| S1-final-viral-combined_k141_90331]] [full     | 1050  | No  | NA    | 0 | 0 | Not-determined | Genome-fragment | NA    | 0     |
| S1-final-viral-combined_k141_387021]] [full    | 1597  | No  | NA    | 0 | 1 | Not-determined | Genome-fragment | NA    | 0     |
| S1-final-viral-combined_k141_387026]] [full    | 1245  | No  | NA    | 0 | 0 | Not-determined | Genome-fragment | NA    | 0     |
| S2-final-viral-combined_k141_90332]] [full     | 2889  | No  | NA    | 0 | 1 | Not-determined | Genome-fragment | NA    | 0     |
| S2-final-viral-combined_k141_170177]] [full    | 1343  | No  | NA    | 0 | 0 | Low-quality    | Genome-fragment | 1.52  | 0     |
| S4-final-viral-combined_k141_25684]] [full     | 1343  | No  | NA    | 0 | 0 | Low-quality    | Genome-fragment | 2.17  | 0     |
| S1-final-viral-combined_k141_244984]] [full    | 4577  | No  | NA    | 0 | 0 | Not-determined | Genome-fragment | NA    | 0     |
| S8-final-viral-combined_k141_23788]] [full     | 1344  | No  | NA    | 0 | 0 | Low-quality    | Genome-fragment | 1.5   | 0     |
| S1-final-viral-combined_k141_255823]] [full    | 1713  | No  | NA    | 0 | 1 | Not-determined | Genome-fragment | NA    | 0     |
| S1-final-viral-combined_k141_238910]] [full    | 1672  | No  | NA    | 0 | 1 | Not-determined | Genome-fragment | NA    | 0     |
| S1-final-viral-combined_k141_222161]] [full    | 2824  | No  | NA    | 0 | 2 | Not-determined | Genome-fragment | NA    | 0     |
| S1-final-viral-combined_k141_124452]] [full    | 1636  | No  | NA    | 0 | 0 | Not-determined | Genome-fragment | NA    | 0     |
| S11-final-viral-combined_k141_242236]] [full   | 1344  | No  | NA    | 0 | 1 | Low-quality    | Genome-fragment | 0.31  | 0     |
| S1-final-viral-combined_k141_270128]] [full    | 1664  | No  | NA    | 0 | 2 | Not-determined | Genome-fragment | NA    | 0     |
| S1-final-viral-combined_k141_301890]] [full    | 1344  | No  | NA    | 0 | 0 | Low-quality    | Genome-fragment | 7.24  | 0     |
| S5_k141_171525                                 | 1344  | No  | NA    | 0 | 0 | Low-quality    | Genome-fragment | 1.02  | 0     |
| S7-final-viral-combined_k141_189130]] [full    | 1344  | No  | NA    | 0 | 3 | Low-quality    | Genome-fragment | 1.19  | 0     |
| S1-final-viral-combined_k141_245151]] [full    | 1255  | No  | NA    | 0 | 1 | Not-determined | Genome-fragment | NA    | 0     |
| S7-final-viral-combined_k141_179549]] [full    | 1344  | No  | NA    | 2 | 0 | Low-quality    | Genome-fragment | 1.91  | 0     |
| S1-final-viral-combined_k141_255854]] [full    | 2165  | No  | NA    | 0 | 1 | Not-determined | Genome-fragment | NA    | 0     |
| S1-final-viral-combined_k141_288059]] [full    | 2307  | No  | NA    | 0 | 2 | Not-determined | Genome-fragment | NA    | 0     |
| S17-final-viral-combined_k141_56186]] [full    | 1344  | No  | NA    | 0 | 0 | Low-quality    | Genome-fragment | 2.51  | 0     |
| S17-final-viral-combined_k141_69471]] [full    | 1344  | No  | NA    | 1 | 0 | Low-quality    | Genome-fragment | 3.79  | 0     |
| S1-final-viral-combined_k141_190357]] [full    | 1215  | No  | NA    | 0 | 1 | Not-determined | Genome-fragment | NA    | 0     |
| S17-final-viral-combined_k141_261542]] [full   | 1344  | No  | NA    | 0 | 0 | Low-quality    | Genome-fragment | 3.58  | 0     |
| S12-final-viral-combined_k141_172359]] [full   | 1344  | No  | NA    | 0 | 0 | Low-quality    | Genome-fragment | 3.28  | 0     |
| S1-final-viral-combined_k141_40822]] [full     | 2397  | No  | NA    | 0 | 1 | Not-determined | Genome-fragment | NA    | 0     |
| S12-final-viral-combined_k141_383802]] [H2gene | 1344  | No  | NA    | 0 | 0 | Low-quality    | Genome-fragment | 2.92  | 0     |
| S1-final-viral-combined_k141_73338]] [full     | 2748  | No  | NA    | 0 | 2 | Not-determined | Genome-fragment | NA    | 0     |
| S2-final-viral-combined_k141_173375]] [full    | 1344  | No  | NA    | 1 | 0 | Low-quality    | Genome-fragment | 3.21  | 0     |
| S6_k141_49111                                  | 1344  | No  | NA    | 0 | 0 | Low-quality    | Genome-fragment | 2.23  | 0     |
| S6-final-viral-combined_k141_34480]] [full     | 1344  | No  | NA    | 0 | 0 | Low-quality    | Genome-fragment | 3.86  | 0     |
| S1-final-viral-combined_k141_40863]] [full     | 1408  | No  | NA    | 0 | 2 | Not-determined | Genome-fragment | NA    | 0     |
| S8-final-viral-combined_k141_265370]] [full    | 1344  | No  | NA    | 0 | 0 | Low-quality    | Genome-fragment | 2.27  | 0     |
| S11-final-viral-combined_k141_239780]] [full   | 1345  | No  | NA    | 0 | 0 | Low-quality    | Genome-fragment | 3.14  | 0     |
| S11-final-viral-combined_k141_62023]] [full    | 1345  | No  | NA    | 1 | 0 | Low-quality    | Genome-fragment | 3.22  | 0     |
| S1-final-viral-combined_k141_24572]] [full     | 3269  | No  | NA    | 0 | 1 | Not-determined | Genome-fragment | NA    | 0     |
| S1-final-viral-combined_k141_85021]] [full     | 1679  | No  | NA    | 0 | 0 | Not-determined | Genome-fragment | NA    | 0     |
| S11-final-viral-combined_k141_227700]] [full   | 1345  | No  | NA    | 0 | 0 | Low-quality    | Genome-fragment | 2.3   | 0     |
| S5-final-viral-combined_k141_127424]] [full    | 1345  | No  | NA    | 0 | 1 | Low-quality    | Genome-fragment | 1.34  | 0     |
| S5_k141_111090                                 | 1345  | No  | NA    | 0 | 0 | Not-determined | Genome-fragment | 2.92  | 0     |
| S1-final-viral-combined_k141_124528]] [full    | 4577  | No  | NA    | 0 | 0 | Not-determined | Genome-fragment | NA    | 0     |
| S7-final-viral-combined_k141_151641]] [full    | 1345  | No  | NA    | 1 | 0 | Low-quality    | Genome-fragment | 0.86  | 0     |
| S12-final-viral-combined_k141_209557]] [full   | 1345  | No  | NA    | 0 | 1 | Low-quality    | Genome-fragment | 0.41  | 0     |
| S2-final-viral-combined_k141_85170]] [full     | 1345  | No  | NA    | 0 | 0 | Low-quality    | Genome-fragment | 3.05  | 0     |
| S1-final-viral-combined_k141_90416]] [full     | 9681  | No  | NA    | 0 | 7 | Not-determined | Genome-fragment | NA    | 0     |
| S12_k141_47518                                 | 1345  | No  | NA    | 0 | 0 | Low-quality    | Genome-fragment | 1.37  | 0     |



|                                      |          |       |    |    |    |    |                |                 |       |   |
|--------------------------------------|----------|-------|----|----|----|----|----------------|-----------------|-------|---|
| S11-final-viral-combined_k141_213524 | [full]   | 1347  | No | NA | 1  | 0  | Low-quality    | Genome-fragment | 2.27  | 0 |
| S1_k141_140091                       |          | 1347  | No | NA | 0  | 1  | Low-quality    | Genome-fragment | 0.41  | 0 |
| S1-final-viral-combined_k141_8748    | [full]   | 2713  | No | NA | 0  | 1  | Not-determined | Genome-fragment | NA    | 0 |
| S3-final-viral-combined_k141_51948   | [full]   | 1347  | No | NA | 0  | 0  | Low-quality    | Genome-fragment | 3.03  | 0 |
| S1-final-viral-combined_k141_222507  | [full]   | 1544  | No | NA | 0  | 0  | Not-determined | Genome-fragment | NA    | 0 |
| S1-final-viral-combined_k141_387101  | [full]   | 3924  | No | NA | 0  | 2  | Not-determined | Genome-fragment | NA    | 0 |
| S1-final-viral-combined_k141_190441  | [full]   | 1510  | No | NA | 0  | 0  | Not-determined | Genome-fragment | NA    | 0 |
| S5-final-viral-combined_k141_312971  | [12gene] | 1347  | No | NA | 1  | 0  | Low-quality    | Genome-fragment | 2.9   | 0 |
| S1-final-viral-combined_k141_387124  | [full]   | 1596  | No | NA | 0  | 2  | Not-determined | Genome-fragment | NA    | 0 |
| S7-final-viral-combined_k141_301971  | [full]   | 1347  | No | NA | 0  | 1  | Low-quality    | Genome-fragment | 2.79  | 0 |
| S1-final-viral-combined_k141_190451  | [full]   | 1131  | No | NA | 0  | 1  | Not-determined | Genome-fragment | NA    | 0 |
| S17-k141_29765                       |          | 1347  | No | NA | 0  | 0  | Low-quality    | Genome-fragment | 2.51  | 0 |
| S1-final-viral-combined_k141_288255  | [full]   | 13560 | No | NA | 0  | 12 | Not-determined | Genome-fragment | NA    | 0 |
| S1-final-viral-combined_k141_73562   | [full]   | 2836  | No | NA | 0  | 1  | Not-determined | Genome-fragment | NA    | 0 |
| S1-final-viral-combined_k141_370410  | [full]   | 1298  | No | NA | 0  | 0  | Not-determined | Genome-fragment | NA    | 0 |
| S12-final-viral-combined_k141_72442  | [full]   | 1347  | No | NA | 0  | 1  | Low-quality    | Genome-fragment | 0.87  | 0 |
| S12-final-viral-combined_k141_91123  | [full]   | 1347  | No | NA | 2  | 0  | Low-quality    | Genome-fragment | 2.79  | 0 |
| S1-final-viral-combined_k141_322413  | [full]   | 2955  | No | NA | 0  | 1  | Not-determined | Genome-fragment | NA    | 0 |
| S2-final-viral-combined_k141_145007  | [full]   | 1347  | No | NA | 1  | 0  | Low-quality    | Genome-fragment | 1.64  | 0 |
| S1-final-viral-combined_k141_206672  | [full]   | 2420  | No | NA | 0  | 0  | Not-determined | Genome-fragment | NA    | 0 |
| S1-final-viral-combined_k141_322416  | [full]   | 2455  | No | NA | 0  | 1  | Not-determined | Genome-fragment | NA    | 0 |
| S1-final-viral-combined_k141_256029  | [full]   | 4216  | No | NA | 0  | 2  | Not-determined | Genome-fragment | NA    | 0 |
| S1-final-viral-combined_k141_370443  | [full]   | 1950  | No | NA | 0  | 1  | Not-determined | Genome-fragment | NA    | 0 |
| S2_k141_116220                       |          | 1347  | No | NA | 0  | 0  | Low-quality    | Genome-fragment | 11.04 | 0 |
| S4-final-viral-combined_k141_121300  | [full]   | 1347  | No | NA | 0  | 1  | Low-quality    | Genome-fragment | 2.26  | 0 |
| S1-final-viral-combined_k141_41079   | [full]   | 1253  | No | NA | 0  | 1  | Not-determined | Genome-fragment | NA    | 0 |
| S1-final-viral-combined_k141_24864   | [full]   | 1915  | No | NA | 0  | 2  | Not-determined | Genome-fragment | NA    | 0 |
| S1-final-viral-combined_k141_8806    | [full]   | 1105  | No | NA | 0  | 1  | Not-determined | Genome-fragment | NA    | 0 |
| S8-final-viral-combined_k141_6668    | [full]   | 1347  | No | NA | 0  | 0  | Low-quality    | Genome-fragment | 3.43  | 0 |
| S1-final-viral-combined_k141_106396  | [full]   | 2043  | No | NA | 0  | 1  | Not-determined | Genome-fragment | NA    | 0 |
| S8_k141_18908                        |          | 1347  | No | NA | 1  | 0  | Low-quality    | Genome-fragment | 0.9   | 0 |
| S1-final-viral-combined_k141_222635  | [full]   | 1372  | No | NA | 0  | 0  | Not-determined | Genome-fragment | NA    | 0 |
| S1-final-viral-combined_k141_190531  | [full]   | 2639  | No | NA | 0  | 1  | Not-determined | Genome-fragment | NA    | 0 |
| S11-final-viral-combined_k141_207502 | [full]   | 1348  | No | NA | 1  | 0  | Low-quality    | Genome-fragment | 3.02  | 0 |
| S11-final-viral-combined_k141_15629  | [full]   | 1348  | No | NA | 0  | 0  | Low-quality    | Genome-fragment | 3.03  | 0 |
| S1-final-viral-combined_k141_288121  | [full]   | 1319  | No | NA | 0  | 0  | Not-determined | Genome-fragment | NA    | 0 |
| S1-final-viral-combined_k141_90688   | [full]   | 1467  | No | NA | 0  | 1  | Not-determined | Genome-fragment | NA    | 0 |
| S11-final-viral-combined_k141_327330 | [full]   | 1348  | No | NA | 1  | 0  | Low-quality    | Genome-fragment | 2.47  | 0 |
| S11_k141_230400                      |          | 1348  | No | NA | 0  | 0  | Low-quality    | Genome-fragment | 1.45  | 0 |
| S1-final-viral-combined_k141_354724  | [full]   | 2308  | No | NA | 0  | 2  | Not-determined | Genome-fragment | NA    | 0 |
| S1-final-viral-combined_k141_288357  | [full]   | 1066  | No | NA | 0  | 2  | Not-determined | Genome-fragment | NA    | 0 |
| S1-final-viral-combined_k141_370504  | [full]   | 2383  | No | NA | 0  | 0  | Not-determined | Genome-fragment | NA    | 0 |
| S1-final-viral-combined_k141_124910  | [full]   | 1348  | No | NA | 0  | 0  | Low-quality    | Genome-fragment | 0.43  | 0 |
| S1-final-viral-combined_k141_370551  | [full]   | 2730  | No | NA | 0  | 1  | Not-determined | Genome-fragment | NA    | 0 |
| S1-final-viral-combined_k141_140372  | [full]   | 2207  | No | NA | 0  | 1  | Not-determined | Genome-fragment | NA    | 0 |
| S1-final-viral-combined_k141_238116  | [full]   | 1348  | No | NA | 0  | 0  | Low-quality    | Genome-fragment | 2.12  | 0 |
| S1-final-viral-combined_k141_7812    | [12gene] | 1348  | No | NA | 2  | 0  | Low-quality    | Genome-fragment | 3.96  | 0 |
| S1-final-viral-combined_k141_222683  | [full]   | 1474  | No | NA | 0  | 0  | Not-determined | Genome-fragment | NA    | 0 |
| S1_k141_110103                       |          | 1348  | No | NA | 0  | 2  | Low-quality    | Genome-fragment | 0.35  | 0 |
| S1-final-viral-combined_k141_354739  | [full]   | 2778  | No | NA | 0  | 3  | Not-determined | Genome-fragment | NA    | 0 |
| S7-final-viral-combined_k141_41486   | [full]   | 1348  | No | NA | 1  | 0  | Low-quality    | Genome-fragment | 1.71  | 0 |
| S7_k141_184709                       |          | 1348  | No | NA | 0  | 0  | Low-quality    | Genome-fragment | 1.42  | 0 |
| S17-k141_6522                        |          | 1348  | No | NA | 0  | 1  | Low-quality    | Genome-fragment | 0.73  | 0 |
| S12-final-viral-combined_k141_23607  | [full]   | 1348  | No | NA | 0  | 1  | Low-quality    | Genome-fragment | 0.92  | 0 |
| S2-final-viral-combined_k141_51921   | [full]   | 1348  | No | NA | 0  | 0  | Low-quality    | Genome-fragment | 2.27  | 0 |
| S1-final-viral-combined_k141_140421  | [full]   | 1274  | No | NA | 0  | 1  | Not-determined | Genome-fragment | NA    | 0 |
| S1-final-viral-combined_k141_288436  | [full]   | 1813  | No | NA | 0  | 1  | Not-determined | Genome-fragment | NA    | 0 |
| S2-final-viral-combined_k141_163550  | [full]   | 1348  | No | NA | 0  | 0  | Low-quality    | Genome-fragment | 2.67  | 0 |
| S1-final-viral-combined_k141_190636  | [full]   | 3578  | No | NA | 0  | 0  | Not-determined | Genome-fragment | NA    | 0 |
| S1-final-viral-combined_k141_190636  | [full]   | 2958  | No | NA | 0  | 1  | Not-determined | Genome-fragment | NA    | 0 |
| S1-final-viral-combined_k141_239362  | [full]   | 2485  | No | NA | 0  | 3  | Not-determined | Genome-fragment | NA    | 0 |
| S1-final-viral-combined_k141_354782  | [full]   | 1387  | No | NA | 0  | 2  | Not-determined | Genome-fragment | NA    | 0 |
| S4_k141_53873                        |          | 1348  | No | NA | 0  | 0  | Low-quality    | Genome-fragment | 1.63  | 0 |
| S9-final-viral-combined_k141_24458   | [full]   | 1349  | No | NA | 0  | 0  | Low-quality    | Genome-fragment | 2.25  | 0 |
| S9-final-viral-combined_k141_76805   | [12gene] | 1349  | No | NA | 0  | 0  | Low-quality    | Genome-fragment | 3.8   | 0 |
| S1-final-viral-combined_k141_172284  | [full]   | 3383  | No | NA | 0  | 1  | Not-determined | Genome-fragment | NA    | 0 |
| S11_k141_242887                      |          | 1349  | No | NA | 1  | 0  | Low-quality    | Genome-fragment | 0.92  | 0 |
| S1-final-viral-combined_k141_41288   | [full]   | 3092  | No | NA | 0  | 2  | Not-determined | Genome-fragment | NA    | 0 |
| S1-final-viral-combined_k141_370684  | [full]   | 1207  | No | NA | 0  | 1  | Not-determined | Genome-fragment | NA    | 0 |
| S1-final-viral-combined_k141_271958  | [full]   | 1890  | No | NA | 0  | 0  | Not-determined | Genome-fragment | NA    | 0 |
| S1-final-viral-combined_k141_352733  | [full]   | 1349  | No | NA | 0  | 0  | Low-quality    | Genome-fragment | 2.74  | 0 |
| S1-final-viral-combined_k141_270381  | [full]   | 1349  | No | NA | 0  | 0  | Low-quality    | Genome-fragment | 3.52  | 0 |
| S3-final-viral-combined_k141_66341   | [full]   | 1349  | No | NA | 0  | 0  | Low-quality    | Genome-fragment | 2.69  | 0 |
| S7-final-viral-combined_k141_8593    | [12gene] | 1349  | No | NA | 1  | 0  | Low-quality    | Genome-fragment | 0.93  | 0 |
| S7_k141_49775                        |          | 1349  | No | NA | 0  | 0  | Low-quality    | Genome-fragment | 2.04  | 0 |
| S17-final-viral-combined_k141_44881  | [full]   | 1349  | No | NA | 0  | 1  | Low-quality    | Genome-fragment | 0.79  | 0 |
| S12-final-viral-combined_k141_62323  | [full]   | 1349  | No | NA | 2  | 0  | Low-quality    | Genome-fragment | 1.36  | 0 |
| S1-final-viral-combined_k141_57839   | [full]   | 2059  | No | NA | 0  | 2  | Not-determined | Genome-fragment | NA    | 0 |
| S12-final-viral-combined_k141_216328 | [full]   | 1349  | No | NA | 1  | 0  | Low-quality    | Genome-fragment | 1.88  | 0 |
| S1-final-viral-combined_k141_140577  | [full]   | 1142  | No | NA | 0  | 0  | Not-determined | Genome-fragment | NA    | 0 |
| S1-final-viral-combined_k141_354899  | [full]   | 18395 | No | NA | 16 | 1  | Medium-quality | Genome-fragment | 72.57 | 0 |
| S1-final-viral-combined_k141_322701  | [full]   | 3451  | No | NA | 0  | 1  | Not-determined | Genome-fragment | NA    | 0 |
| S1-final-viral-combined_k141_190702  | [full]   | 3774  | No | NA | 0  | 4  | Not-determined | Genome-fragment | NA    | 0 |
| S1-final-viral-combined_k141_250921  | [full]   | 2101  | No | NA | 0  | 2  | Not-determined | Genome-fragment | NA    | 0 |
| S1-final-viral-combined_k141_270765  | [full]   | 3345  | No | NA | 0  | 2  | Not-determined | Genome-fragment | NA    | 0 |
| S1-final-viral-combined_k141_156205  | [full]   | 1018  | No | NA | 0  | 0  | Not-determined | Genome-fragment | NA    | 0 |
| S1-final-viral-combined_k141_354936  | [full]   | 2127  | No | NA | 0  | 1  | Not-determined | Genome-fragment | NA    | 0 |
| S1-final-viral-combined_k141_73770   | [full]   | 3573  | No | NA | 0  | 2  | Not-determined | Genome-fragment | NA    | 0 |
| S1-final-viral-combined_k141_106561  | [full]   | 3362  | No | NA | 0  | 0  | Not-determined | Genome-fragment | NA    | 0 |
| S1-final-viral-combined_k141_156234  | [full]   | 6549  | No | NA | 0  | 0  | Not-determined | Genome-fragment | NA    | 0 |
| S1-final-viral-combined_k141_41369   | [full]   | 36028 | No | NA | 17 | 1  | Medium-quality | Genome-fragment | 83.64 | 0 |
| S2-final-viral-combined_k141_15836   | [full]   | 1349  | No | NA | 3  | 0  | Low-quality    | Genome-fragment | 2.04  | 0 |
| S2-final-viral-combined_k141_130272  | [full]   | 1349  | No | NA | 1  | 0  | Low-quality    | Genome-fragment | 3.79  | 0 |
| S9-final-viral-combined_k141_124536  | [full]   | 1350  | No | NA | 1  | 0  | Low-quality    | Genome-fragment | 2.73  | 0 |
| S11-final-viral-combined_k141_18714  | [12gene] | 1350  | No | NA | 0  | 0  | Low-quality    | Genome-fragment | 5.94  | 0 |
| S7-final-viral-combined_k141_133769  | [full]   | 1350  | No | NA | 2  | 1  | Low-quality    | Genome-fragment | 0.46  | 0 |
| S1-final-viral-combined_k141_70831   | [full]   | 1410  | No | NA | 0  | 0  | Not-determined | Genome-fragment | NA    | 0 |
| S17-final-viral-combined_k141_135993 | [full]   | 1350  | No | NA | 0  | 0  | Low-quality    | Genome-fragment | 3.68  | 0 |
| S1-final-viral-combined_k141_25616   | [full]   | 5195  | No | NA | 0  | 2  | Not-determined | Genome-fragment | NA    | 0 |
| S1-final-viral-combined_k141_125057  | [full]   | 1650  | No | NA | 0  | 0  | Not-determined | Genome-fragment | NA    | 0 |
| S2_k141_237059                       |          | 1350  | No | NA | 0  | 0  | Low-quality    | Genome-fragment | 2.66  | 0 |
| S1-final-viral-combined_k141_140700  | [full]   | 3862  | No | NA | 0  | 4  | Not-determined | Genome-fragment | NA    | 0 |
| S1-final-viral-combined_k141_133682  | [full]   | 4058  | No | NA | 0  | 2  | Not-determined | Genome-fragment | NA    | 0 |
| S1-final-viral-combined_k141_125075  | [full]   | 1350  | No | NA | 0  | 0  | Low-quality    | Genome-fragment | 1.44  | 0 |
| S1-final-viral-combined_k141_41379   | [full]   | 5175  | No | NA | 0  | 2  | Not-determined | Genome-fragment | NA    | 0 |
| S1-final-viral-combined_k141_41379   | [full]   | 10985 | No | NA | 0  | 8  | Not-determined | Genome-fragment | NA    | 0 |
| S1-final-viral-combined_k141_288677  | [full]   | 1883  | No | NA | 0  | 2  | Not-determined | Genome-fragment | NA    | 0 |
| S1-final-viral-combined_k141_41387   | [full]   | 3852  | No | NA | 0  | 0  | Not-determined | Genome-fragment | NA    | 0 |
| S1-final-viral-combined_k141_156271  | [full]   | 1191  | No | NA | 0  | 1  | Not-determined | Genome-fragment | NA    | 0 |
| S11-final-viral-combined_k141_67256  | [full]   | 1351  | No | NA | 0  | 1  | Low-quality    | Genome-fragment | 0.45  | 0 |
| S1-final-viral-combined_k141_522615  | [full]   | 2495  | No | NA | 0  | 2  | Not-determined | Genome-fragment | NA    | 0 |
| S1-final-viral-combined_k141_20551   | [full]   | 6453  | No | NA | 0  | 1  | Not-determined | Genome-fragment | NA    | 0 |
| S1-final-viral-combined_k141_120927  | [full]   | 1351  | No | NA | 0  | 0  | Low-quality    | Genome-fragment | 2.35  | 0 |
| S1-final-viral-combined_k141_387706  | [full]   | 2088  | No | NA | 0  | 1  | Not-determined | Genome-fragment | NA    | 0 |
| S1-final-viral-combined_k141_73863   | [full]   | 1208  | No | NA | 0  | 0  | Not-determined | Genome-fragment | NA    | 0 |
| S1-final-viral-combined_k141_207052  | [full]   | 2177  | No | NA | 0  | 3  | Not-determined | Genome-fragment | NA    | 0 |
| S1-final-viral-combined_k141_73865   | [full]   | 1058  | No | NA | 0  | 1  | Not-determined | Genome-fragment | NA    | 0 |
| S5-final-viral-combined_k141_180510  | [full]   | 1351  | No | NA | 0  | 1  | Low-quality    | Genome-fragment | 1.75  | 0 |
| S1-final-viral-combined_k141_238603  | [full]   | 1244  | No | NA | 0  | 1  | Not-determined | Genome-fragment | NA    | 0 |
| S1-final-viral-combined_k141_256430  | [full]   | 2323  | No | NA | 0  | 2  | Not-determined | Genome-fragment | NA    | 0 |
| S1-final-viral-combined_k141_9085    | [full]   | 1355  | No | NA | 0  | 1  | Not-determined | Genome-fragment | NA    | 0 |
| S1-final-viral-combined_k141_125146  | [full]   | 3424  | No | NA | 0  | 2  | Not-determined | Genome-fragment | NA    | 0 |
| S1-final-viral-combined_k141_727193  | [full]   | 7269  | No | NA | 0  | 6  | Not-determined | Genome-fragment | NA    | 0 |
| S5-final-viral-combined_k141_19329   | [12gene] | 1351  | No | NA | 1  | 0  | Low-quality    | Genome-fragment | 3.02  | 0 |
| S1-final-viral-combined_k141_387752  | [full]   | 1907  | No | NA | 0  | 3  | Not-determined | Genome-fragment | NA    | 0 |
| S1-final-viral-combined_k141_305953  | [full]   | 1861  | No | NA | 0  | 0  | Not-determined | Genome-fragment | NA    | 0 |
| S1-final-viral-combined_k141_165356  | [full]   | 2977  | No | NA | 0  | 1  | Not-determined | Genome-fragment | NA    | 0 |
| S7_k141_125183                       |          | 1351  | No | NA | 0  | 1  | Low-quality    | Genome-fragment | 2.26  | 0 |
| S17-final-viral-combined_k141_184683 | [full]   | 1351  | No | NA | 1  | 0  | Low-quality    | Genome-fragment | 26.52 | 0 |
| S17-final-viral-combined_k141_140012 | [full]   | 1351  | No | NA | 0  | 0  | Low-quality    | Genome-fragment | 2.1   | 0 |
| S1-final-viral-com                   |          |       |    |    |    |    |                |                 |       |   |



|                                      |          |       |    |    |    |   |                |                 |    |       |
|--------------------------------------|----------|-------|----|----|----|---|----------------|-----------------|----|-------|
| S1-final-viral-combined_k141_172632  | [full]   | 3069  | No | NA | 0  | 1 | Not-determined | Genome-fragment | NA | 0     |
| S1-final-viral-combined_k141_239790  | [full]   | 4990  | No | NA | 1  | 0 | Not-determined | Genome-fragment | NA | 0     |
| S5_k141_63420                        |          | 1352  | No | NA | 0  | 0 | Low-quality    | Genome-fragment | NA | 2.81  |
| S1-final-viral-combined_k141_172636  | [full]   | 4551  | No | NA | 0  | 3 | Not-determined | Genome-fragment | NA | 0     |
| S7-final-viral-combined_k141_23194   | [full]   | 1352  | No | NA | 1  | 0 | Low-quality    | Genome-fragment | NA | 1.57  |
| S1-final-viral-combined_k141_306142  | [full]   | 1797  | No | NA | 0  | 2 | Not-determined | Genome-fragment | NA | 0     |
| S1-final-viral-combined_k141_106867  | [full]   | 2344  | No | NA | 0  | 1 | Not-determined | Genome-fragment | NA | 0     |
| S1-final-viral-combined_k141_9350    | [full]   | 13160 | No | NA | 0  | 5 | Not-determined | Genome-fragment | NA | 0     |
| S1-final-viral-combined_k141_233081  | [full]   | 1704  | No | NA | 0  | 2 | Not-determined | Genome-fragment | NA | 0     |
| S1-final-viral-combined_k141_207327  | [full]   | 2608  | No | NA | 0  | 1 | Not-determined | Genome-fragment | NA | 0     |
| S1-final-viral-combined_k141_91342   | [full]   | 7354  | No | NA | 0  | 1 | Not-determined | Genome-fragment | NA | 0     |
| S1-final-viral-combined_k141_337549  | [full]   | 1411  | No | NA | 0  | 2 | Not-determined | Genome-fragment | NA | 0     |
| S1-final-viral-combined_k141_337559  | [full]   | 2228  | No | NA | 0  | 2 | Not-determined | Genome-fragment | NA | 0     |
| S17-final-viral-combined_k141_68903  | [full]   | 1352  | No | NA | 2  | 0 | Low-quality    | Genome-fragment | NA | 3.94  |
| S17-k141_90264                       |          | 1352  | No | NA | 0  | 0 | Low-quality    | Genome-fragment | NA | 0.88  |
| S1-final-viral-combined_k141_156571  | [full]   | 2115  | No | NA | 0  | 2 | Not-determined | Genome-fragment | NA | 0     |
| S12_k141_364594                      |          | 1352  | No | NA | 0  | 0 | Low-quality    | Genome-fragment | NA | 2.44  |
| S2-final-viral-combined_k141_69242   | [full]   | 1352  | No | NA | 0  | 0 | Low-quality    | Genome-fragment | NA | 1.93  |
| S1-final-viral-combined_k141_322919  | [full]   | 3817  | No | NA | 0  | 3 | Not-determined | Genome-fragment | NA | 0     |
| S11_k141_206084                      |          | 1353  | No | NA | 0  | 0 | Low-quality    | Genome-fragment | NA | 2.21  |
| S1-final-viral-combined_k141_355243  | [full]   | 4048  | No | NA | 0  | 4 | Not-determined | Genome-fragment | NA | 0     |
| S1-final-viral-combined_k141_371590  | [full]   | 3651  | No | NA | 0  | 2 | Not-determined | Genome-fragment | NA | 0     |
| S1-final-viral-combined_k141_41664   | [full]   | 1064  | No | NA | 0  | 0 | Not-determined | Genome-fragment | NA | 0     |
| S1-final-viral-combined_k141_66473   | [full]   | 1353  | No | NA | 0  | 0 | Low-quality    | Genome-fragment | NA | 2.63  |
| S1-final-viral-combined_k141_384458  | [full]   | 1353  | No | NA | 0  | 1 | Low-quality    | Genome-fragment | NA | 2.24  |
| S1-final-viral-combined_k141_306247  | [full]   | 7697  | No | NA | 0  | 7 | Not-determined | Genome-fragment | NA | 0     |
| S3-final-viral-combined_k141_76608   | [full]   | 1353  | No | NA | 0  | 1 | Low-quality    | Genome-fragment | NA | 1.41  |
| S5-final-viral-combined_k141_163063  | [full]   | 1353  | No | NA | 0  | 1 | Low-quality    | Genome-fragment | NA | 3.1   |
| S1-final-viral-combined_k141_232313  | [full]   | 4751  | No | NA | 0  | 2 | Not-determined | Genome-fragment | NA | 0     |
| S1-final-viral-combined_k141_156637  | [full]   | 11186 | No | NA | 5  | 1 | Medium-quality | Genome-fragment | NA | 87.8  |
| S1-final-viral-combined_k141_9480    | [full]   | 3889  | No | NA | 0  | 2 | Not-determined | Genome-fragment | NA | 0     |
| S1-final-viral-combined_k141_74232   | [full]   | 1521  | No | NA | 0  | 2 | Not-determined | Genome-fragment | NA | 0     |
| S1-final-viral-combined_k141_41739   | [full]   | 3473  | No | NA | 0  | 1 | Not-determined | Genome-fragment | NA | 0     |
| S1-final-viral-combined_k141_141152  | [full]   | 1503  | No | NA | 0  | 2 | Not-determined | Genome-fragment | NA | 0     |
| S5-final-viral-combined_k141_115663  | [full]   | 1353  | No | NA | 0  | 0 | Low-quality    | Genome-fragment | NA | 3.41  |
| S1-final-viral-combined_k141_232313  | [full]   | 1149  | No | NA | 0  | 2 | Not-determined | Genome-fragment | NA | 0     |
| S1-final-viral-combined_k141_387998  | [full]   | 1351  | No | NA | 0  | 1 | Not-determined | Genome-fragment | NA | 0     |
| S1-final-viral-combined_k141_74251   | [full]   | 3061  | No | NA | 0  | 2 | Not-determined | Genome-fragment | NA | 0     |
| S12-final-viral-combined_k141_395641 | [full]   | 1353  | No | NA | 0  | 0 | Low-quality    | Genome-fragment | NA | 2.78  |
| S1-final-viral-combined_k141_322982  | [full]   | 1745  | No | NA | 0  | 2 | Not-determined | Genome-fragment | NA | 0     |
| S12-final-viral-combined_k141_92833  | [H2gene] | 1353  | No | NA | 2  | 0 | Low-quality    | Genome-fragment | NA | 3.14  |
| S1-final-viral-combined_k141_232356  | [full]   | 1717  | No | NA | 0  | 0 | Not-determined | Genome-fragment | NA | 0     |
| S1-final-viral-combined_k141_388049  | [full]   | 1066  | No | NA | 0  | 1 | Not-determined | Genome-fragment | NA | 0     |
| S1-final-viral-combined_k141_125392  | [full]   | 2693  | No | NA | 0  | 1 | Not-determined | Genome-fragment | NA | 0     |
| S1-final-viral-combined_k141_5837    | [full]   | 3266  | No | NA | 0  | 2 | Not-determined | Genome-fragment | NA | 0     |
| S1-final-viral-combined_k141_107940  | [full]   | 2210  | No | NA | 0  | 2 | Not-determined | Genome-fragment | NA | 0     |
| S4-final-viral-combined_k141_147200  | [full]   | 1353  | No | NA | 0  | 0 | Low-quality    | Genome-fragment | NA | 3.69  |
| S4-final-viral-combined_k141_9407    | [full]   | 1353  | No | NA | 0  | 0 | Low-quality    | Genome-fragment | NA | 2.72  |
| S1-final-viral-combined_k141_9511    | [full]   | 4921  | No | NA | 0  | 2 | Not-determined | Genome-fragment | NA | 0     |
| S4-final-viral-combined_k141_71212   | [H2gene] | 1353  | No | NA | 2  | 0 | Low-quality    | Genome-fragment | NA | 2.82  |
| S9_k141_2222                         |          | 1354  | No | NA | 0  | 0 | Low-quality    | Genome-fragment | NA | 4.1   |
| S12-final-viral-combined_k141_210789 | [full]   | 1354  | No | NA | 0  | 0 | Low-quality    | Genome-fragment | NA | 3.84  |
| S1-final-viral-combined_k141_58411   | [full]   | 4030  | No | NA | 0  | 3 | Not-determined | Genome-fragment | NA | 0     |
| S1-final-viral-combined_k141_9534    | [full]   | 4899  | No | NA | 0  | 3 | Not-determined | Genome-fragment | NA | 0     |
| S1-final-viral-combined_k141_249563  | [full]   | 1354  | No | NA | 0  | 0 | Low-quality    | Genome-fragment | NA | 2.44  |
| S5-final-viral-combined_k141_145589  | [H2gene] | 1354  | No | NA | 2  | 0 | Low-quality    | Genome-fragment | NA | 2.66  |
| S1-final-viral-combined_k141_83516   | [full]   | 1354  | No | NA | 0  | 0 | Low-quality    | Genome-fragment | NA | 3.12  |
| S17-k141_127806                      |          | 1354  | No | NA | 0  | 0 | Low-quality    | Genome-fragment | NA | 3.29  |
| S1-final-viral-combined_k141_107073  | [full]   | 21709 | No | NA | 13 | 0 | Medium-quality | Genome-fragment | NA | 56.42 |
| S6-final-viral-combined_k141_89390   | [full]   | 1354  | No | NA | 0  | 0 | Low-quality    | Genome-fragment | NA | 2.88  |
| S1-final-viral-combined_k141_107102  | [full]   | 2689  | No | NA | 0  | 0 | Not-determined | Genome-fragment | NA | 0     |
| S1-final-viral-combined_k141_9568    | [full]   | 1417  | No | NA | 0  | 0 | Not-determined | Genome-fragment | NA | 0     |
| S8-final-viral-combined_k141_155484  | [full]   | 1354  | No | NA | 0  | 1 | Low-quality    | Genome-fragment | NA | 1.32  |
| S1-final-viral-combined_k141_74361   | [full]   | 4014  | No | NA | 0  | 3 | Not-determined | Genome-fragment | NA | 0     |
| S1-final-viral-combined_k141_388132  | [full]   | 5532  | No | NA | 0  | 4 | Not-determined | Genome-fragment | NA | 0     |
| S8_k141_239573                       |          | 1354  | No | NA | 0  | 0 | Low-quality    | Genome-fragment | NA | 0.88  |
| S1-final-viral-combined_k141_191183  | [full]   | 1771  | No | NA | 0  | 1 | Not-determined | Genome-fragment | NA | 0     |
| S1-final-viral-combined_k141_236127  | [full]   | 1355  | No | NA | 0  | 1 | Low-quality    | Genome-fragment | NA | 0.72  |
| S5-final-viral-combined_k141_4241    | [full]   | 1355  | No | NA | 0  | 0 | Low-quality    | Genome-fragment | NA | 0.85  |
| S5-final-viral-combined_k141_143873  | [H2gene] | 1355  | No | NA | 1  | 0 | Low-quality    | Genome-fragment | NA | 1.52  |
| S1-final-viral-combined_k141_74412   | [full]   | 1165  | No | NA | 0  | 1 | Not-determined | Genome-fragment | NA | 0     |
| S7-final-viral-combined_k141_559380  | [full]   | 1355  | No | NA | 0  | 0 | Low-quality    | Genome-fragment | NA | 3.82  |
| S1-final-viral-combined_k141_156796  | [full]   | 4204  | No | NA | 0  | 2 | Not-determined | Genome-fragment | NA | 0     |
| S17-k141_155801                      |          | 1355  | No | NA | 0  | 2 | Low-quality    | Genome-fragment | NA | 2.79  |
| S1-final-viral-combined_k141_141285  | [full]   | 3915  | No | NA | 0  | 2 | Not-determined | Genome-fragment | NA | 0     |
| S1-final-viral-combined_k141_306336  | [full]   | 1582  | No | NA | 0  | 2 | Not-determined | Genome-fragment | NA | 0     |
| S12-final-viral-combined_k141_374418 | [full]   | 1355  | No | NA | 0  | 0 | Low-quality    | Genome-fragment | NA | 2.66  |
| S12-final-viral-combined_k141_160769 | [full]   | 1355  | No | NA | 0  | 1 | Low-quality    | Genome-fragment | NA | 2.13  |
| S1-final-viral-combined_k141_125544  | [full]   | 5186  | No | NA | 0  | 2 | Not-determined | Genome-fragment | NA | 0     |
| S1-final-viral-combined_k141_371448  | [full]   | 5455  | No | NA | 0  | 3 | Not-determined | Genome-fragment | NA | 0     |
| S1-final-viral-combined_k141_191206  | [full]   | 1634  | No | NA | 0  | 2 | Not-determined | Genome-fragment | NA | 0     |
| S1-final-viral-combined_k141_155656  | [full]   | 2602  | No | NA | 0  | 3 | Not-determined | Genome-fragment | NA | 0     |
| S1-final-viral-combined_k141_388241  | [full]   | 2572  | No | NA | 0  | 3 | Not-determined | Genome-fragment | NA | 0     |
| S12-final-viral-combined_k141_237135 | [H2gene] | 1355  | No | NA | 1  | 0 | Low-quality    | Genome-fragment | NA | 0.75  |
| S2-final-viral-combined_k141_55834   | [full]   | 1355  | No | NA | 1  | 1 | Low-quality    | Genome-fragment | NA | 3.17  |
| S1-final-viral-combined_k141_371493  | [full]   | 5659  | No | NA | 0  | 7 | Not-determined | Genome-fragment | NA | 0     |
| S8-final-viral-combined_k141_265009  | [full]   | 1355  | No | NA | 0  | 0 | Low-quality    | Genome-fragment | NA | 5.39  |
| S1-final-viral-combined_k141_41971   | [full]   | 1643  | No | NA | 0  | 3 | Not-determined | Genome-fragment | NA | 0     |
| S1-final-viral-combined_k141_232371  | [full]   | 4581  | No | NA | 0  | 2 | Not-determined | Genome-fragment | NA | 0     |
| S1-final-viral-combined_k141_9760    | [full]   | 1316  | No | NA | 0  | 1 | Not-determined | Genome-fragment | NA | 0     |
| S1-final-viral-combined_k141_91800   | [full]   | 1833  | No | NA | 0  | 0 | Not-determined | Genome-fragment | NA | 0     |
| S1-final-viral-combined_k141_173151  | [full]   | 1511  | No | NA | 0  | 1 | Not-determined | Genome-fragment | NA | 0     |
| S1-final-viral-combined_k141_91809   | [full]   | 4005  | No | NA | 0  | 3 | Not-determined | Genome-fragment | NA | 0     |
| S1-final-viral-combined_k141_289233  | [full]   | 1207  | No | NA | 0  | 2 | Not-determined | Genome-fragment | NA | 0     |
| S1-final-viral-combined_k141_74545   | [full]   | 10676 | No | NA | 0  | 6 | Not-determined | Genome-fragment | NA | 0     |
| S1-final-viral-combined_k141_323240  | [full]   | 1798  | No | NA | 0  | 2 | Not-determined | Genome-fragment | NA | 0     |
| S8-final-viral-combined_k141_60607   | [full]   | 1355  | No | NA | 2  | 0 | Low-quality    | Genome-fragment | NA | 2.4   |
| S11-final-viral-combined_k141_20096  | [full]   | 1356  | No | NA | 0  | 0 | Low-quality    | Genome-fragment | NA | 2.41  |
| S1-final-viral-combined_k141_191296  | [full]   | 2033  | No | NA | 0  | 2 | Not-determined | Genome-fragment | NA | 0     |
| S1-final-viral-combined_k141_156897  | [full]   | 1184  | No | NA | 0  | 2 | Not-determined | Genome-fragment | NA | 0     |
| S1-final-viral-combined_k141_23131   | [full]   | 1313  | No | NA | 0  | 1 | Not-determined | Genome-fragment | NA | 0     |
| S1-final-viral-combined_k141_289251  | [full]   | 1023  | No | NA | 0  | 1 | Not-determined | Genome-fragment | NA | 0     |
| S1-final-viral-combined_k141_173137  | [full]   | 1157  | No | NA | 0  | 0 | Not-determined | Genome-fragment | NA | 0     |
| S1-final-viral-combined_k141_55688   | [full]   | 1356  | No | NA | 0  | 0 | Low-quality    | Genome-fragment | NA | 2.79  |
| S1-final-viral-combined_k141_257156  | [full]   | 1449  | No | NA | 0  | 2 | Not-determined | Genome-fragment | NA | 0     |
| S1-final-viral-combined_k141_323295  | [full]   | 1010  | No | NA | 0  | 2 | Not-determined | Genome-fragment | NA | 0     |
| S1-final-viral-combined_k141_141431  | [full]   | 3026  | No | NA | 0  | 2 | Not-determined | Genome-fragment | NA | 0     |
| S1-final-viral-combined_k141_289291  | [full]   | 1221  | No | NA | 0  | 1 | Not-determined | Genome-fragment | NA | 0     |
| S1-final-viral-combined_k141_146437  | [full]   | 1356  | No | NA | 0  | 1 | Low-quality    | Genome-fragment | NA | 2.27  |
| S1-final-viral-combined_k141_306481  | [full]   | 1438  | No | NA | 0  | 2 | Not-determined | Genome-fragment | NA | 0     |
| S1-final-viral-combined_k141_23859   | [full]   | 5118  | No | NA | 0  | 6 | Not-determined | Genome-fragment | NA | 0     |
| S1-final-viral-combined_k141_289301  | [full]   | 1635  | No | NA | 0  | 1 | Not-determined | Genome-fragment | NA | 0     |
| S1-final-viral-combined_k141_16170   | [H2gene] | 1356  | No | NA | 1  | 0 | Low-quality    | Genome-fragment | NA | 1.24  |
| S7_k141_50886                        |          | 1356  | No | NA | 0  | 0 | Low-quality    | Genome-fragment | NA | 1.72  |
| S17-final-viral-combined_k141_91780  | [full]   | 1356  | No | NA | 0  | 0 | Low-quality    | Genome-fragment | NA | 2.57  |
| S1-final-viral-combined_k141_257165  | [full]   | 1088  | No | NA | 0  | 2 | Not-determined | Genome-fragment | NA | 0     |
| S1-final-viral-combined_k141_141449  | [full]   | 6302  | No | NA | 0  | 0 | Not-determined | Genome-fragment | NA | 0     |
| S1-final-viral-combined_k141_306499  | [full]   | 2406  | No | NA | 0  | 2 | Not-determined | Genome-fragment | NA | 0     |
| S17-k141_33681                       |          | 1356  | No | NA | 0  | 0 | Low-quality    | Genome-fragment | NA | 0.47  |
| S12-final-viral-combined_k141_211436 | [H2gene] | 1356  | No | NA | 1  | 0 | Low-quality    | Genome-fragment | NA | 2.26  |
| S1-final-viral-combined_k141_257376  | [full]   | 1276  | No | NA | 0  | 0 | Not-determined | Genome-fragment | NA | 0     |
| S1-final-viral-combined_k141_232361  | [full]   | 2268  | No | NA | 0  | 2 | Not-determined | Genome-fragment | NA | 0     |
| S12_k141_127844                      |          | 1356  | No | NA | 0  | 0 | Low-quality    | Genome-fragment | NA | 1.14  |
| S1-final-viral-combined_k141_289369  | [full]   | 4427  | No | NA | 0  | 2 | Not-determined | Genome-fragment | NA | 0     |
| S2-final-viral-combined_k141_142957  | [full]   | 1356  | No | NA | 0  | 0 | Low-quality    | Genome-fragment | NA | 2.8   |
| S2_k141_217159                       |          | 1356  | No | NA | 0  | 0 | Low-quality    | Genome-fragment | NA | 1.93  |
| S1-final-viral-combined_k141_306555  | [full]   | 5943  | No | NA | 0  | 4 | Not-determined | Genome-fragment | NA | 0     |
| S1-final-viral-combined_k141_74556   | [full]   | 1282  | No | NA | 0  | 2 | Not-determined | Genome-fragment | NA | 0     |
| S1-final-viral-combined_k141_240282  | [full]   | 2968  | No | NA | 0  | 1 | Not-determined | Genome-fragment | NA | 0     |
| S1-final-viral-combined_k141_337961  | [full]   | 1168  | No | NA | 0  | 2 | Not-determined | Genome-fragment | NA | 0     |
| S1-final-viral-combined_k141_337972  |          |       |    |    |    |   |                |                 |    |       |



|                                      |          |       |     |       |    |    |                |                 |       |       |   |
|--------------------------------------|----------|-------|-----|-------|----|----|----------------|-----------------|-------|-------|---|
| S1-final-viral-combined_k141_125837  | [full]   | 1053  | No  | NA    | 0  | 0  | Not-determined | Genome-fragment | NA    | 0     | 0 |
| S1-final-viral-combined_k141_173150  | [full]   | 1381  | No  | NA    | 0  | 0  | Not-determined | Genome-fragment | NA    | 0     | 0 |
| S1-final-viral-combined_k141_125841  | [full]   | 4904  | No  | NA    | 0  | 0  | Not-determined | Genome-fragment | NA    | 0     | 0 |
| S1-final-viral-combined_k141_150632  | [H2gene] | 1358  | No  | NA    | 1  | 0  | Low-quality    | Genome-fragment | NA    | 3.57  | 0 |
| S1-final-viral-combined_k141_338224  | [full]   | 1411  | No  | NA    | 0  | 1  | Not-determined | Genome-fragment | NA    | 0     | 0 |
| S1-final-viral-combined_k141_371753  | [full]   | 2158  | No  | NA    | 0  | 1  | Not-determined | Genome-fragment | NA    | 0     | 0 |
| S1-final-viral-combined_k141_173376  | [full]   | 6546  | No  | NA    | 0  | 7  | Not-determined | Genome-fragment | NA    | 0     | 0 |
| S1-final-viral-combined_k141_191640  | [full]   | 9295  | No  | NA    | 0  | 4  | Not-determined | Genome-fragment | NA    | 0     | 0 |
| S1-final-viral-combined_k141_899531  | [full]   | 1358  | No  | NA    | 0  | 2  | Low-quality    | Genome-fragment | NA    | 0.94  | 0 |
| S1-final-viral-combined_k141_157270  | [full]   | 3973  | No  | NA    | 0  | 2  | Not-determined | Genome-fragment | NA    | 0     | 0 |
| S1-final-viral-combined_k141_356053  | [full]   | 1357  | No  | NA    | 0  | 1  | Not-determined | Genome-fragment | NA    | 0     | 0 |
| S1-final-viral-combined_k141_289704  | [full]   | 2015  | No  | NA    | 0  | 2  | Not-determined | Genome-fragment | NA    | 0     | 0 |
| S5-final-viral-combined_k141_181804  | [H2gene] | 1358  | No  | NA    | 1  | 0  | Low-quality    | Genome-fragment | NA    | 1.01  | 0 |
| S1-final-viral-combined_k141_174592  | [full]   | 1358  | No  | NA    | 0  | 0  | Low-quality    | Genome-fragment | NA    | 2.62  | 0 |
| S1-final-viral-combined_k141_107666  | [full]   | 1513  | No  | NA    | 0  | 1  | Not-determined | Genome-fragment | NA    | 0     | 0 |
| S17-final-viral-combined_k141_54603  | [full]   | 1358  | No  | NA    | 0  | 1  | Not-determined | Genome-fragment | NA    | 0.83  | 0 |
| S2-final-viral-combined_k141_74650   | [full]   | 1358  | No  | NA    | 1  | 0  | Low-quality    | Genome-fragment | NA    | 3.01  | 0 |
| S9-final-viral-combined_k141_71895   | [full]   | 1359  | No  | NA    | 1  | 0  | Low-quality    | Genome-fragment | NA    | 4.04  | 0 |
| S1-final-viral-combined_k141_257496  | [full]   | 1359  | No  | NA    | 0  | 1  | Not-determined | Genome-fragment | NA    | 1.49  | 0 |
| S1-final-viral-combined_k141_306863  | [full]   | 6578  | No  | NA    | 0  | 3  | Not-determined | Genome-fragment | NA    | 0     | 0 |
| S11-final-viral-combined_k141_232947 | [H2gene] | 1359  | No  | NA    | 1  | 0  | Low-quality    | Genome-fragment | NA    | 2.19  | 0 |
| S1-final-viral-combined_k141_289714  | [full]   | 2527  | No  | NA    | 0  | 2  | Not-determined | Genome-fragment | NA    | 0     | 0 |
| S11-final-viral-combined_k141_11921  | [H2gene] | 1359  | No  | NA    | 1  | 0  | Low-quality    | Genome-fragment | NA    | 3.01  | 0 |
| S1-final-viral-combined_k141_356106  | [full]   | 1123  | No  | NA    | 0  | 0  | Not-determined | Genome-fragment | NA    | 0     | 0 |
| S1-final-viral-combined_k141_240544  | [full]   | 2192  | No  | NA    | 0  | 3  | Not-determined | Genome-fragment | NA    | 1.49  | 0 |
| S1-final-viral-combined_k141_371751  | [full]   | 9824  | No  | NA    | 0  | 1  | Not-determined | Genome-fragment | NA    | 0     | 0 |
| S1-final-viral-combined_k141_257516  | [full]   | 3121  | No  | NA    | 0  | 0  | Not-determined | Genome-fragment | NA    | 2.43  | 0 |
| S1_k141_387052                       |          | 1359  | No  | NA    | 0  | 0  | Low-quality    | Genome-fragment | NA    | 0     | 0 |
| S1-final-viral-combined_k141_208276  | [full]   | 3147  | No  | NA    | 0  | 0  | Not-determined | Genome-fragment | NA    | 0     | 0 |
| S5-final-viral-combined_k141_34106   | [full]   | 1359  | No  | NA    | 0  | 0  | Low-quality    | Genome-fragment | NA    | 3.1   | 0 |
| S5-final-viral-combined_k141_97665   | [full]   | 1359  | No  | NA    | 3  | 0  | Low-quality    | Genome-fragment | NA    | 2.03  | 0 |
| S7-final-viral-combined_k141_89789   | [full]   | 1359  | No  | NA    | 0  | 0  | Low-quality    | Genome-fragment | NA    | 3.2   | 0 |
| S1-final-viral-combined_k141_42397   | [full]   | 2257  | No  | NA    | 0  | 0  | Not-determined | Genome-fragment | NA    | 0     | 0 |
| S1-final-viral-combined_k141_74781   | [full]   | 1052  | No  | NA    | 0  | 2  | Not-determined | Genome-fragment | NA    | 0     | 0 |
| S1-final-viral-combined_k141_74782   | [full]   | 1311  | No  | NA    | 0  | 0  | Not-determined | Genome-fragment | NA    | 0     | 0 |
| S1-final-viral-combined_k141_42403   | [full]   | 1020  | No  | NA    | 0  | 1  | Not-determined | Genome-fragment | NA    | 0     | 0 |
| S7_k141_200361                       |          | 1359  | No  | NA    | 0  | 1  | Low-quality    | Genome-fragment | NA    | 0.65  | 0 |
| S1-final-viral-combined_k141_141627  | [full]   | 2149  | No  | NA    | 0  | 0  | Not-determined | Genome-fragment | NA    | 0     | 0 |
| S1-final-viral-combined_k141_191743  | [full]   | 1109  | No  | NA    | 0  | 0  | Not-determined | Genome-fragment | NA    | 0     | 0 |
| S17-final-viral-combined_k141_113710 | [full]   | 1359  | No  | NA    | 0  | 2  | Low-quality    | Genome-fragment | NA    | 4.12  | 0 |
| S17-final-viral-combined_k141_36062  | [full]   | 1359  | No  | NA    | 0  | 0  | Low-quality    | Genome-fragment | NA    | 1.74  | 0 |
| S1-final-viral-combined_k141_289787  | [full]   | 2484  | No  | NA    | 0  | 1  | Not-determined | Genome-fragment | NA    | 0     | 0 |
| S12-final-viral-combined_k141_72428  | [full]   | 1359  | No  | NA    | 2  | 0  | Low-quality    | Genome-fragment | NA    | 3.18  | 0 |
| S1-final-viral-combined_k141_273054  | [full]   | 1917  | No  | NA    | 0  | 2  | Not-determined | Genome-fragment | NA    | 0     | 0 |
| S12-final-viral-combined_k141_275023 | [full]   | 1359  | No  | NA    | 2  | 0  | Low-quality    | Genome-fragment | NA    | 3.19  | 0 |
| S1-final-viral-combined_k141_74851   | [full]   | 3100  | No  | NA    | 0  | 0  | Not-determined | Genome-fragment | NA    | 0     | 0 |
| S1-final-viral-combined_k141_356210  | [full]   | 4888  | No  | NA    | 0  | 2  | Not-determined | Genome-fragment | NA    | 0     | 0 |
| S1-final-viral-combined_k141_257617  | [full]   | 9271  | No  | NA    | 0  | 1  | Not-determined | Genome-fragment | NA    | 0     | 0 |
| S1-final-viral-combined_k141_173467  | [full]   | 3287  | No  | NA    | 0  | 0  | Not-determined | Genome-fragment | NA    | 0     | 0 |
| S1-final-viral-combined_k141_338393  | [full]   | 3233  | No  | NA    | 0  | 2  | Not-determined | Genome-fragment | NA    | 0     | 0 |
| S12-final-viral-combined_k141_232241 | [H2gene] | 1359  | No  | NA    | 2  | 0  | Low-quality    | Genome-fragment | NA    | 3.64  | 0 |
| S4-final-viral-combined_k141_585623  | [full]   | 1359  | No  | NA    | 0  | 1  | Low-quality    | Genome-fragment | NA    | 1.49  | 0 |
| S1-final-viral-combined_k141_107766  | [full]   | 53116 | Yes | 36184 | 10 | 13 | Medium-quality | Genome-fragment | 86.89 | 31.88 | 0 |
| S1-final-viral-combined_k141_240655  | [full]   | 11704 | No  | NA    | 0  | 4  | Not-determined | Genome-fragment | NA    | 0     | 0 |
| S1-final-viral-combined_k141_356255  | [full]   | 2072  | No  | NA    | 0  | 0  | Not-determined | Genome-fragment | NA    | 0     | 0 |
| S1-final-viral-combined_k141_93229   | [full]   | 8493  | No  | NA    | 0  | 7  | Not-determined | Genome-fragment | NA    | 0     | 0 |
| S4-final-viral-combined_k141_163862  | [full]   | 1359  | No  | NA    | 1  | 0  | Low-quality    | Genome-fragment | NA    | 0.86  | 0 |
| S1-final-viral-combined_k141_240679  | [full]   | 2128  | No  | NA    | 0  | 1  | Not-determined | Genome-fragment | NA    | 2.25  | 0 |
| S4-final-viral-combined_k141_95825   | [full]   | 1359  | No  | NA    | 0  | 0  | Low-quality    | Genome-fragment | NA    | 1.72  | 0 |
| S8_k141_10999                        |          | 1359  | No  | NA    | 0  | 2  | Not-determined | Genome-fragment | NA    | 2.98  | 0 |
| S1-final-viral-combined_k141_257700  | [full]   | 2642  | No  | NA    | 0  | 0  | Low-quality    | Genome-fragment | NA    | 3.25  | 0 |
| S9-final-viral-combined_k141_52308   | [full]   | 1360  | No  | NA    | 1  | 0  | Low-quality    | Genome-fragment | NA    | 2.74  | 0 |
| S1-final-viral-combined_k141_141883  | [full]   | 1360  | No  | NA    | 2  | 0  | Low-quality    | Genome-fragment | NA    | 0     | 0 |
| S1-final-viral-combined_k141_59018   | [full]   | 7793  | No  | NA    | 0  | 5  | Not-determined | Genome-fragment | NA    | 0     | 0 |
| S1-final-viral-combined_k141_376631  | [full]   | 1360  | No  | NA    | 0  | 0  | Low-quality    | Genome-fragment | NA    | 0     | 0 |
| S1-final-viral-combined_k141_59021   | [full]   | 1806  | No  | NA    | 0  | 2  | Not-determined | Genome-fragment | NA    | 0     | 0 |
| S1-final-viral-combined_k141_102641  | [full]   | 8107  | No  | NA    | 0  | 1  | Not-determined | Genome-fragment | NA    | 0     | 0 |
| S1-final-viral-combined_k141_356345  | [full]   | 1377  | No  | NA    | 0  | 1  | Not-determined | Genome-fragment | NA    | 0     | 0 |
| S1-final-viral-combined_k141_191846  | [full]   | 13676 | No  | NA    | 0  | 0  | Not-determined | Genome-fragment | NA    | 0     | 0 |
| S7-final-viral-combined_k141_148260  | [full]   | 1360  | No  | NA    | 0  | 0  | Low-quality    | Genome-fragment | NA    | 2.36  | 0 |
| S7_k141_130141                       |          | 1360  | No  | NA    | 0  | 0  | Low-quality    | Genome-fragment | NA    | 1.08  | 0 |
| S1-final-viral-combined_k141_356352  | [full]   | 4104  | No  | NA    | 0  | 1  | Not-determined | Genome-fragment | NA    | 0     | 0 |
| S1-final-viral-combined_k141_289954  | [full]   | 1967  | No  | NA    | 0  | 2  | Not-determined | Genome-fragment | NA    | 0     | 0 |
| S17-final-viral-combined_k141_250269 | [full]   | 1360  | No  | NA    | 1  | 0  | Low-quality    | Genome-fragment | NA    | 2.42  | 0 |
| S17_k141_256459                      |          | 1360  | No  | NA    | 0  | 0  | Low-quality    | Genome-fragment | NA    | 1.89  | 0 |
| S12-final-viral-combined_k141_186985 | [full]   | 1360  | No  | NA    | 1  | 0  | Low-quality    | Genome-fragment | NA    | 3     | 0 |
| S2-final-viral-combined_k141_231133  | [full]   | 1360  | No  | NA    | 0  | 1  | Low-quality    | Genome-fragment | NA    | 3.35  | 0 |
| S1-final-viral-combined_k141_141832  | [full]   | 2495  | No  | NA    | 0  | 1  | Not-determined | Genome-fragment | NA    | 0     | 0 |
| S1-final-viral-combined_k141_289961  | [full]   | 2219  | No  | NA    | 0  | 1  | Not-determined | Genome-fragment | NA    | 0     | 0 |
| S1-final-viral-combined_k141_173568  | [full]   | 1414  | No  | NA    | 0  | 0  | Not-determined | Genome-fragment | NA    | 0     | 0 |
| S1-final-viral-combined_k141_257617  | [full]   | 14494 | No  | NA    | 0  | 10 | Not-determined | Genome-fragment | NA    | 0     | 0 |
| S1-final-viral-combined_k141_126071  | [full]   | 3004  | No  | NA    | 0  | 0  | Not-determined | Genome-fragment | NA    | 0     | 0 |
| S2-final-viral-combined_k141_60621   | [full]   | 1360  | No  | NA    | 0  | 0  | Low-quality    | Genome-fragment | NA    | 2.92  | 0 |
| S1-final-viral-combined_k141_126049  | [full]   | 2173  | No  | NA    | 0  | 1  | Not-determined | Genome-fragment | NA    | 2.92  | 0 |
| S8-final-viral-combined_k141_124214  | [H2gene] | 1360  | No  | NA    | 0  | 0  | Low-quality    | Genome-fragment | NA    | 0     | 0 |
| S1-final-viral-combined_k141_59084   | [full]   | 4879  | No  | NA    | 0  | 0  | Not-determined | Genome-fragment | NA    | 0     | 0 |
| S1_k141_127924                       |          | 1361  | No  | NA    | 0  | 1  | Low-quality    | Genome-fragment | NA    | 2.26  | 0 |
| S1-final-viral-combined_k141_20005   | [full]   | 4630  | No  | NA    | 0  | 1  | Not-determined | Genome-fragment | NA    | 1.22  | 0 |
| S7-final-viral-combined_k141_267078  | [full]   | 1361  | No  | NA    | 2  | 0  | Low-quality    | Genome-fragment | NA    | 2.62  | 0 |
| S17-final-viral-combined_k141_152452 | [full]   | 36514 | No  | NA    | 0  | 20 | Not-determined | Genome-fragment | NA    | 4.57  | 0 |
| S1-final-viral-combined_k141_10286   | [full]   | 1361  | No  | NA    | 0  | 1  | Low-quality    | Genome-fragment | NA    | 0     | 0 |
| S17_k141_222839                      |          | 1598  | No  | NA    | 0  | 0  | Not-determined | Genome-fragment | NA    | 0     | 0 |
| S1-final-viral-combined_k141_372074  | [full]   | 1361  | No  | NA    | 0  | 0  | Low-quality    | Genome-fragment | NA    | 2.29  | 0 |
| S17_k141_57873                       |          | 1065  | No  | NA    | 0  | 0  | Not-determined | Genome-fragment | NA    | 2.19  | 0 |
| S12-final-viral-combined_k141_372078 | [full]   | 1361  | No  | NA    | 0  | 0  | Low-quality    | Genome-fragment | NA    | 0     | 0 |
| S1-final-viral-combined_k141_58370   | [full]   | 2618  | No  | NA    | 0  | 2  | Not-determined | Genome-fragment | NA    | 0     | 0 |
| S1-final-viral-combined_k141_126183  | [full]   | 5176  | No  | NA    | 0  | 3  | Not-determined | Genome-fragment | NA    | 0     | 0 |
| S1-final-viral-combined_k141_42645   | [full]   | 3411  | No  | NA    | 0  | 0  | Not-determined | Genome-fragment | NA    | 0     | 0 |
| S1-final-viral-combined_k141_24465   | [full]   | 1153  | No  | NA    | 0  | 0  | Not-determined | Genome-fragment | NA    | 0     | 0 |
| S1-final-viral-combined_k141_257617  | [full]   | 2363  | No  | NA    | 0  | 1  | Not-determined | Genome-fragment | NA    | 2.39  | 0 |
| S12-final-viral-combined_k141_281638 | [full]   | 1361  | No  | NA    | 0  | 0  | Low-quality    | Genome-fragment | NA    | 1.28  | 0 |
| S6-final-viral-combined_k141_36703   | [full]   | 1361  | No  | NA    | 0  | 4  | Not-determined | Genome-fragment | NA    | 3.29  | 0 |
| S1-final-viral-combined_k141_257856  | [full]   | 6862  | No  | NA    | 0  | 2  | Not-determined | Genome-fragment | NA    | 0     | 0 |
| S1-final-viral-combined_k141_372134  | [full]   | 2541  | No  | NA    | 0  | 0  | Low-quality    | Genome-fragment | NA    | 0     | 0 |
| S6-final-viral-combined_k141_14070   | [full]   | 1361  | No  | NA    | 0  | 0  | Low-quality    | Genome-fragment | NA    | 0     | 0 |
| S1-final-viral-combined_k141_338549  | [full]   | 5377  | No  | NA    | 0  | 5  | Not-determined | Genome-fragment | NA    | 0     | 0 |
| S1-final-viral-combined_k141_257885  | [full]   | 6549  | No  | NA    | 0  | 4  | Not-determined | Genome-fragment | NA    | 0     | 0 |
| S1-final-viral-combined_k141_307207  | [full]   | 3451  | No  | NA    | 0  | 0  | Not-determined | Genome-fragment | NA    | 0     | 0 |
| S8-final-viral-combined_k141_77169   | [full]   | 1361  | No  | NA    | 0  | 0  | Low-quality    | Genome-fragment | NA    | 0.98  | 0 |
| S1-final-viral-combined_k141_338569  | [full]   | 1554  | No  | NA    | 0  | 0  | Not-determined | Genome-fragment | NA    | 0.48  | 0 |
| S11-final-viral-combined_k141_278870 | [full]   | 1362  | No  | NA    | 3  | 0  | Low-quality    | Genome-fragment | NA    | 4.57  | 0 |
| S11-final-viral-combined_k141_200627 | [full]   | 3373  | No  | NA    | 0  | 2  | Not-determined | Genome-fragment | NA    | 1.97  | 0 |
| S1-final-viral-combined_k141_26544   | [full]   | 1362  | No  | NA    | 0  | 0  | Low-quality    | Genome-fragment | NA    | 0     | 0 |
| S5-final-viral-combined_k141_189045  | [full]   | 3030  | No  | NA    | 0  | 0  | Not-determined | Genome-fragment | NA    | 0     | 0 |
| S1-final-viral-combined_k141_338582  | [full]   | 1185  | No  | NA    | 0  | 2  | Not-determined | Genome-fragment | NA    | 1.65  | 0 |
| S1-final-viral-combined_k141_42694   | [full]   | 1362  | No  | NA    | 0  | 1  | Low-quality    | Genome-fragment | NA    | 0     | 0 |
| S7-final-viral-combined_k141_205419  | [full]   | 2897  | No  | NA    | 0  | 0  | Not-determined | Genome-fragment | NA    | 0     | 0 |
| S1-final-viral-combined_k141_208550  | [full]   | 1324  | No  | NA    | 0  | 0  | Not-determined | Genome-fragment | NA    | 0     | 0 |
| S1-final-viral-combined_k141_411993  | [full]   | 31793 | Yes | 21321 | 10 | 8  | Medium-quality | Genome-fragment | 61.28 | 32.84 | 0 |
| S1-final-viral-combined_k141_252523  | [full]   | 1047  | No  | NA    | 0  | 0  | Not-determined | Genome-fragment | NA    | 0     | 0 |
| S1-final-viral-combined_k141_224136  | [full]   | 1030  | No  | NA    | 0  | 1  | Not-determined | Genome-fragment | NA    | 0     | 0 |
| S1-final-viral-combined_k141_75145   | [full]   | 9387  | No  | NA    | 0  | 7  | Not-d          |                 |       |       |   |



|                                      |       |    |    |    |                |                 |                 |       |   |
|--------------------------------------|-------|----|----|----|----------------|-----------------|-----------------|-------|---|
| S9_k141_84895                        | 1364  | No | NA | 0  | 1              | Low-quality     | Genome-fragment | 0.48  | 0 |
| S1-final-viral-combined_k141_2087751 | 4029  | No | NA | 0  | 0              | Not-determined  | Genome-fragment | NA    | 0 |
| S1-final-viral-combined_k141_241111  | 1438  | No | NA | 0  | 1              | Not-determined  | Genome-fragment | NA    | 0 |
| S11-final-viral-combined_k141_55419  | 1364  | No | NA | 1  | 0              | Low-quality     | Genome-fragment | 0.83  | 0 |
| S1-final-viral-combined_k141_338785  | 1235  | No | NA | 0  | 0              | Not-determined  | Genome-fragment | NA    | 0 |
| S1-final-viral-combined_k141_185200  | 1364  | No | NA | 0  | 0              | Low-quality     | Genome-fragment | 3.74  | 0 |
| S1-final-viral-combined_k141_388731  | 5268  | No | NA | 0  | 5              | Not-determined  | Genome-fragment | NA    | 0 |
| S1-final-viral-combined_k141_258197  | 2226  | No | NA | 0  | 2              | Not-determined  | Genome-fragment | NA    | 0 |
| S7-final-viral-combined_k141_239352  | 1364  | No | NA | 0  | 0              | Low-quality     | Genome-fragment | 3.04  | 0 |
| S17-k141_149286                      | 1364  | No | NA | 2  | 0              | Low-quality     | Genome-fragment | 1.72  | 0 |
| S12-final-viral-combined_k141_376748 | 1364  | No | NA | 0  | 0              | Low-quality     | Genome-fragment | 2.24  | 0 |
| S12-final-viral-combined_k141_265283 | 1364  | No | NA | 1  | 0              | Low-quality     | Genome-fragment | 2.84  | 0 |
| S12_k141_124575                      | 1364  | No | NA | 0  | 0              | Low-quality     | Genome-fragment | 3.46  | 0 |
| S1-final-viral-combined_k141_338837  | 6024  | No | NA | 0  | 6              | Not-determined  | Genome-fragment | NA    | 0 |
| S2-final-viral-combined_k141_55720   | 1364  | No | NA | 0  | 0              | Low-quality     | Genome-fragment | 2.4   | 0 |
| S1-final-viral-combined_k141_108837  | 1137  | No | NA | 0  | 0              | Not-determined  | Genome-fragment | NA    | 0 |
| S1-final-viral-combined_k141_290347  | 2652  | No | NA | 0  | 0              | Not-determined  | Genome-fragment | NA    | 0 |
| S1-final-viral-combined_k141_290350  | 2575  | No | NA | 0  | 0              | Not-determined  | Genome-fragment | NA    | 0 |
| S11-final-viral-combined_k141_310041 | 1365  | No | NA | 0  | 0              | Low-quality     | Genome-fragment | 1.51  | 0 |
| S1-final-viral-combined_k141_165878  | 1365  | No | NA | 0  | 1              | Low-quality     | Genome-fragment | 1.12  | 0 |
| S1-final-viral-combined_k141_324293  | 1480  | No | NA | 0  | 1              | Not-determined  | Genome-fragment | NA    | 0 |
| S1-final-viral-combined_k141_87489   | 1365  | No | NA | 0  | 0              | Low-quality     | Genome-fragment | 0.71  | 0 |
| S17-k141_220745                      | 1365  | No | NA | 0  | 2              | Low-quality     | Genome-fragment | 0.15  | 0 |
| S1-final-viral-combined_k141_307324  | 5594  | No | NA | 0  | 1              | Not-determined  | Genome-fragment | NA    | 0 |
| S1-final-viral-combined_k141_258249  | 1265  | No | NA | 0  | 0              | Not-determined  | Genome-fragment | NA    | 0 |
| S12-final-viral-combined_k141_86776  | 1365  | No | NA | 0  | 0              | Low-quality     | Genome-fragment | 3.59  | 0 |
| S12-final-viral-combined_k141_157135 | 1365  | No | NA | 2  | 0              | Low-quality     | Genome-fragment | 3.44  | 0 |
| S1-final-viral-combined_k141_126617  | 1255  | No | NA | 0  | 1              | Not-determined  | Genome-fragment | NA    | 0 |
| S1-final-viral-combined_k141_126618  | 1177  | No | NA | 0  | 2              | Not-determined  | Genome-fragment | NA    | 0 |
| S1-final-viral-combined_k141_258282  | 3193  | No | NA | 0  | 0              | Not-determined  | Genome-fragment | NA    | 0 |
| S1-final-viral-combined_k141_142368  | 1347  | No | NA | 0  | 1              | Not-determined  | Genome-fragment | NA    | 0 |
| S1-final-viral-combined_k141_142374  | 4294  | No | NA | 3  | Not-determined | Genome-fragment | NA              | 0     |   |
| S12-final-viral-combined_k141_80641  | 1365  | No | NA | 0  | 0              | Low-quality     | Genome-fragment | 3.1   | 0 |
| S1-final-viral-combined_k141_59551   | 1063  | No | NA | 0  | 1              | Not-determined  | Genome-fragment | NA    | 0 |
| S1-final-viral-combined_k141_10502   | 7776  | No | NA | 0  | 4              | Not-determined  | Genome-fragment | NA    | 0 |
| S2-final-viral-combined_k141_40814   | 1365  | No | NA | 0  | 1              | Low-quality     | Genome-fragment | 2.97  | 0 |
| S1-final-viral-combined_k141_192321  | 5826  | No | NA | 0  | 1              | Not-determined  | Genome-fragment | NA    | 0 |
| S1-final-viral-combined_k141_290423  | 3760  | No | NA | 0  | 3              | Not-determined  | Genome-fragment | NA    | 0 |
| S1-final-viral-combined_k141_172296  | 1144  | No | NA | 1  | Not-determined | Genome-fragment | NA              | 0     |   |
| S1-final-viral-combined_k141_307388  | 3367  | No | NA | 0  | 1              | Not-determined  | Genome-fragment | NA    | 0 |
| S6-final-viral-combined_k141_22231   | 1365  | No | NA | 1  | 0              | Low-quality     | Genome-fragment | 1.05  | 0 |
| S1-final-viral-combined_k141_273820  | 1063  | No | NA | 0  | 0              | Not-determined  | Genome-fragment | NA    | 0 |
| S1-final-viral-combined_k141_356823  | 2818  | No | NA | 0  | 1              | Not-determined  | Genome-fragment | NA    | 0 |
| S6_k141_30238                        | 1365  | No | NA | 0  | 0              | Low-quality     | Genome-fragment | 3.26  | 0 |
| S8-final-viral-combined_k141_245992  | 1365  | No | NA | 0  | 0              | Low-quality     | Genome-fragment | 3.52  | 0 |
| S1-final-viral-combined_k141_258317  | 10312 | No | NA | 0  | 7              | Not-determined  | Genome-fragment | NA    | 0 |
| S1-final-viral-combined_k141_75464   | 3366  | No | NA | 0  | 2              | Not-determined  | Genome-fragment | NA    | 0 |
| S8-final-viral-combined_k141_248152  | 1365  | No | NA | 0  | 0              | Low-quality     | Genome-fragment | 3.43  | 0 |
| S9-final-viral-combined_k141_117460  | 1366  | No | NA | 0  | 0              | Low-quality     | Genome-fragment | 4.32  | 0 |
| S1-final-viral-combined_k141_26768   | 4603  | No | NA | 0  | 2              | Not-determined  | Genome-fragment | NA    | 0 |
| S1-final-viral-combined_k141_33038   | 2996  | No | NA | 0  | 0              | Not-determined  | Genome-fragment | NA    | 0 |
| S11-final-viral-combined_k141_1421   | 1366  | No | NA | 0  | 0              | Low-quality     | Genome-fragment | 2.09  | 0 |
| S1-final-viral-combined_k141_43167   | 4573  | No | NA | 0  | 3              | Not-determined  | Genome-fragment | NA    | 0 |
| S1_k141_223601                       | 1366  | No | NA | 2  | 0              | Low-quality     | Genome-fragment | 2.98  | 0 |
| S1-final-viral-combined_k141_33047   | 1103  | No | NA | 0  | 0              | Not-determined  | Genome-fragment | NA    | 0 |
| S1-final-viral-combined_k141_307405  | 6449  | No | NA | 0  | 2              | Not-determined  | Genome-fragment | NA    | 0 |
| S1-final-viral-combined_k141_142454  | 2101  | No | NA | 0  | 2              | Not-determined  | Genome-fragment | NA    | 0 |
| S1-final-viral-combined_k141_43178   | 1469  | No | NA | 0  | 1              | Not-determined  | Genome-fragment | NA    | 0 |
| S7-final-viral-combined_k141_113697  | 1366  | No | NA | 0  | 1              | Low-quality     | Genome-fragment | 2.93  | 0 |
| S1-final-viral-combined_k141_174173  | 1844  | No | NA | 0  | 0              | Not-determined  | Genome-fragment | NA    | 0 |
| S1-final-viral-combined_k141_290494  | 1908  | No | NA | 0  | 1              | Not-determined  | Genome-fragment | NA    | 0 |
| S1-final-viral-combined_k141_324168  | 2917  | No | NA | 0  | 2              | Not-determined  | Genome-fragment | NA    | 0 |
| S1-final-viral-combined_k141_174209  | 1162  | No | NA | 0  | 0              | Not-determined  | Genome-fragment | NA    | 0 |
| S1-final-viral-combined_k141_26840   | 1184  | No | NA | 0  | 0              | Not-determined  | Genome-fragment | NA    | 0 |
| S1-final-viral-combined_k141_142445  | 3111  | No | NA | 0  | 0              | Not-determined  | Genome-fragment | NA    | 0 |
| S7-final-viral-combined_k141_4090    | 1366  | No | NA | 0  | 1              | Low-quality     | Genome-fragment | 2.35  | 0 |
| S1-final-viral-combined_k141_126778  | 2211  | No | NA | 0  | 0              | Not-determined  | Genome-fragment | NA    | 0 |
| S1-final-viral-combined_k141_10609   | 1942  | No | NA | 0  | 0              | Not-determined  | Genome-fragment | NA    | 0 |
| S1-final-viral-combined_k141_388920  | 2601  | No | NA | 0  | 0              | Not-determined  | Genome-fragment | NA    | 0 |
| S7-final-viral-combined_k141_17553   | 1366  | No | NA | 1  | 0              | Low-quality     | Genome-fragment | 3.68  | 0 |
| S1-final-viral-combined_k141_372636  | 2537  | No | NA | 0  | 2              | Not-determined  | Genome-fragment | NA    | 0 |
| S7_k141_223601                       | 1366  | No | NA | 0  | 1              | Low-quality     | Genome-fragment | 0.89  | 0 |
| S1-final-viral-combined_k141_126796  | 7642  | No | NA | 0  | 4              | Not-determined  | Genome-fragment | NA    | 0 |
| S17-final-viral-combined_k141_374723 | 1366  | No | NA | 0  | 2              | Low-quality     | Genome-fragment | 0.94  | 0 |
| S1-final-viral-combined_k141_256080  | 2769  | No | NA | 0  | 2              | Not-determined  | Genome-fragment | NA    | 0 |
| S1-final-viral-combined_k141_273732  | 2507  | No | NA | 0  | 0              | Not-determined  | Genome-fragment | NA    | 0 |
| S1-final-viral-combined_k141_10650   | 2964  | No | NA | 0  | 3              | Not-determined  | Genome-fragment | NA    | 0 |
| S12-final-viral-combined_k141_385633 | 1366  | No | NA | 0  | 1              | Low-quality     | Genome-fragment | 1.49  | 0 |
| S12_k141_173641                      | 1366  | No | NA | 0  | 0              | Low-quality     | Genome-fragment | 0.63  | 0 |
| S1-final-viral-combined_k141_224578  | 25656 | No | NA | 10 | 0              | Medium-quality  | Genome-fragment | 59.81 | 0 |
| S1-final-viral-combined_k141_389551  | 1137  | No | NA | 0  | 0              | Not-determined  | Genome-fragment | NA    | 0 |
| S12_k141_31593                       | 1366  | No | NA | 0  | 0              | Low-quality     | Genome-fragment | 1.36  | 0 |
| S1-final-viral-combined_k141_307508  | 1131  | No | NA | 0  | 0              | Not-determined  | Genome-fragment | NA    | 0 |
| S1-final-viral-combined_k141_192472  | 2734  | No | NA | 0  | 3              | Not-determined  | Genome-fragment | NA    | 0 |
| S2-final-viral-combined_k141_46120   | 1366  | No | NA | 0  | 0              | Low-quality     | Genome-fragment | 2.69  | 0 |
| S2-final-viral-combined_k141_80025   | 1366  | No | NA | 0  | 1              | Low-quality     | Genome-fragment | 0.72  | 0 |
| S1-final-viral-combined_k141_258450  | 14490 | No | NA | 0  | 11             | Not-determined  | Genome-fragment | NA    | 0 |
| S1-final-viral-combined_k141_126855  | 3339  | No | NA | 0  | 1              | Not-determined  | Genome-fragment | NA    | 0 |
| S1-final-viral-combined_k141_200032  | 1367  | No | NA | 0  | 1              | Low-quality     | Genome-fragment | 0.91  | 0 |
| S1-final-viral-combined_k141_107031  | 1774  | No | NA | 0  | 1              | Not-determined  | Genome-fragment | NA    | 0 |
| S1-final-viral-combined_k141_356923  | 2853  | No | NA | 0  | 3              | Not-determined  | Genome-fragment | NA    | 0 |
| S1-final-viral-combined_k141_319785  | 1367  | No | NA | 0  | 0              | Low-quality     | Genome-fragment | 2.47  | 0 |
| S1-final-viral-combined_k141_344624  | 1367  | No | NA | 0  | 1              | Low-quality     | Genome-fragment | 2.55  | 0 |
| S1-final-viral-combined_k141_126927  | 2900  | No | NA | 0  | 1              | Not-determined  | Genome-fragment | NA    | 0 |
| S1-final-viral-combined_k141_307680  | 2871  | No | NA | 0  | 1              | Not-determined  | Genome-fragment | NA    | 0 |
| S1-final-viral-combined_k141_372747  | 1108  | No | NA | 0  | 2              | Not-determined  | Genome-fragment | NA    | 0 |
| S1-final-viral-combined_k141_10770   | 3126  | No | NA | 0  | 2              | Not-determined  | Genome-fragment | NA    | 0 |
| S1-final-viral-combined_k141_75632   | 2241  | No | NA | 0  | 2              | Not-determined  | Genome-fragment | NA    | 0 |
| S3-final-viral-combined_k141_101559  | 1367  | No | NA | 0  | 1              | Low-quality     | Genome-fragment | 0.72  | 0 |
| S5-final-viral-combined_k141_71535   | 1367  | No | NA | 0  | 1              | Low-quality     | Genome-fragment | 1.78  | 0 |
| S5-final-viral-combined_k141_80262   | 1367  | No | NA | 1  | 0              | Low-quality     | Genome-fragment | 3.49  | 0 |
| S7-final-viral-combined_k141_74577   | 1367  | No | NA | 0  | 0              | Low-quality     | Genome-fragment | 0.76  | 0 |
| S1-final-viral-combined_k141_290621  | 2136  | No | NA | 0  | 1              | Not-determined  | Genome-fragment | NA    | 0 |
| S1-final-viral-combined_k141_93226   | 1250  | No | NA | 0  | 2              | Not-determined  | Genome-fragment | NA    | 0 |
| S1-final-viral-combined_k141_108031  | 1596  | No | NA | 0  | 1              | Not-determined  | Genome-fragment | NA    | 0 |
| S1-final-viral-combined_k141_126948  | 2468  | No | NA | 0  | 1              | Not-determined  | Genome-fragment | NA    | 0 |
| S17-k141_228107                      | 1367  | No | NA | 0  | 0              | Low-quality     | Genome-fragment | 0.78  | 0 |
| S1-final-viral-combined_k141_209205  | 8161  | No | NA | 0  | 4              | Not-determined  | Genome-fragment | NA    | 0 |
| S1-final-viral-combined_k141_290643  | 2193  | No | NA | 0  | 0              | Not-determined  | Genome-fragment | NA    | 0 |
| S12-final-viral-combined_k141_300455 | 1367  | No | NA | 0  | 0              | Low-quality     | Genome-fragment | 0.86  | 0 |
| S1-final-viral-combined_k141_224718  | 2108  | No | NA | 0  | 1              | Not-determined  | Genome-fragment | NA    | 0 |
| S1-final-viral-combined_k141_158309  | 4305  | No | NA | 0  | 0              | Not-determined  | Genome-fragment | NA    | 0 |
| S12_k141_274374                      | 1367  | No | NA | 3  | 0              | Low-quality     | Genome-fragment | 2.64  | 0 |
| S1-final-viral-combined_k141_241508  | 3962  | No | NA | 0  | 2              | Not-determined  | Genome-fragment | NA    | 0 |
| S1-final-viral-combined_k141_42378   | 1444  | No | NA | 0  | 0              | Not-determined  | Genome-fragment | NA    | 0 |
| S1-final-viral-combined_k141_126965  | 3275  | No | NA | 0  | 3              | Not-determined  | Genome-fragment | NA    | 0 |
| S12_k141_96259                       | 1367  | No | NA | 0  | 0              | Low-quality     | Genome-fragment | 0.91  | 0 |
| S2-final-viral-combined_k141_44276   | 1367  | No | NA | 0  | 0              | Low-quality     | Genome-fragment | 1.64  | 0 |
| S2-final-viral-combined_k141_168180  | 1367  | No | NA | 0  | 1              | Low-quality     | Genome-fragment | 2.31  | 0 |
| S1-final-viral-combined_k141_372867  | 3087  | No | NA | 0  | 1              | Not-determined  | Genome-fragment | NA    | 0 |
| S1-final-viral-combined_k141_27092   | 1930  | No | NA | 0  | 1              | Not-determined  | Genome-fragment | NA    | 0 |
| S2-final-viral-combined_k141_256241  | 1367  | No | NA | 0  | 1              | Low-quality     | Genome-fragment | 4.63  | 0 |
| S1-final-viral-combined_k141_59847   | 2058  | No | NA | 0  | 1              | Not-determined  | Genome-fragment | NA    | 0 |
| S1-final-viral-combined_k141_10888   | 4172  | No | NA | 0  | 2              | Not-determined  | Genome-fragment | NA    | 0 |
| S2_k141_142111                       | 1367  | No | NA | 0  | 2              | Low-quality     | Genome-fragment | 0.68  | 0 |
| S1-final-viral-combined_k141_324647  | 2415  | No | NA | 0  | 1              | Not-determined  | Genome-fragment | NA    | 0 |
| S1-final-viral-combined_k141_357034  | 1499  | No | NA | 0  | 0              | Not-determined  | Genome-fragment | NA    | 0 |
| S4-final-viral-combined_k141_252311  | 1367  | No | NA | 0  | 0              | Low-quality     | Genome-fragment | 0.86  | 0 |
| S1-final-viral-combined_k141_93331   | 1920  | No | NA | 0  | 0              | Not-determined  | Genome-fragment | NA    | 0 |
| S1-final-viral-combined_k141_59870   | 8442  | No | NA | 0  | 7              | Not-determined  | Genome-fragment | NA    | 0 |
| S1-final-viral-combined_k141_158350  | 2154  | No | NA | 0  | 0              | Not-determined  | Genome-fragment | NA    | 0 |
| S1-final-viral-combined_k141_389161  | 3173  | No | NA | 0  | 0              | Not-determined  | Genome-fragment | NA    | 0 |
| S8-final-viral-combined_k141_214967  | 1367  | No | NA | 0  | 0              | Low-quality     | Genome-fragment | 2.04  | 0 |
| S1_k141_311240                       | 1368  | No | NA | 0  | 0              | Low-quality     | Genome-fragment | 0.79  | 0 |
| S1-final-viral-combined_k141_372880  | 2053  | No | NA | 0  | 2              | Not-determined  | Genome-fragment | NA    | 0 |
| S1-final-viral-combined_k141_241575  | 3262  | No | NA | 0  | 2              | Not-determined  | Genome-fragment | NA    | 0 |
| S1-final-viral-combined_k141_258671  | 2040  | No | NA | 0  | 2              | Not-determined  | Genome-fragment | NA    | 0 |
| S1-final-viral-combined_k141_357066  | 1502  | No | NA | 0  | 0              | Not-determined  | Genome-fragment | NA    | 0 |
| S1-final-viral-combined_k141_339243  | 10674 | No | NA | 0  | 5              | Not-determined  | Genome-fragment | NA    |   |



|                                      |          |       |     |     |   |   |                  |                 |    |       |       |
|--------------------------------------|----------|-------|-----|-----|---|---|------------------|-----------------|----|-------|-------|
| S1-final-viral-combined_k141_1891919 | [full]   | 1129  | No  | NA  | 0 | 0 | Not-determined   | Genome-fragment | NA | 0     | 0     |
| S5_k141_14870                        |          | 1369  | No  | NA  | 0 | 1 | Low-quality      | Genome-fragment | NA | 1.36  | 0     |
| S7-final-viral-combined_k141_228383  | [full]   | 1369  | No  | NA  | 1 | 0 | Low-quality      | Genome-fragment | NA | 3.56  | 0     |
| S1-final-viral-combined_k141_224943  | [full]   | 1659  | No  | NA  | 0 | 0 | Not-determined   | Genome-fragment | NA | 0     | 0     |
| S12-final-viral-combined_k141_339533 | [full]   | 1369  | No  | NA  | 1 | 0 | Low-quality      | Genome-fragment | NA | 3.05  | 0     |
| S12-final-viral-combined_k141_394155 | [full]   | 1369  | No  | NA  | 0 | 0 | Low-quality      | Genome-fragment | NA | 3.56  | 0     |
| S1-final-viral-combined_k141_224958  | [full]   | 1971  | No  | NA  | 0 | 0 | 3 Not-determined | Genome-fragment | NA | 0     | 0     |
| S1-final-viral-combined_k141_272721  | [full]   | 2195  | No  | NA  | 0 | 3 | Not-determined   | Genome-fragment | NA | 0     | 0     |
| S12-final-viral-combined_k141_31171  | [full]   | 1369  | No  | NA  | 0 | 1 | Low-quality      | Genome-fragment | NA | 3.22  | 0     |
| S1-final-viral-combined_k141_290967  | [full]   | 2186  | No  | NA  | 0 | 2 | Not-determined   | Genome-fragment | NA | 0     | 0     |
| S1-final-viral-combined_k141_59989   | [full]   | 4408  | No  | NA  | 0 | 2 | Not-determined   | Genome-fragment | NA | 0     | 0     |
| S12_k141_307545                      |          | 1369  | No  | NA  | 0 | 0 | Low-quality      | Genome-fragment | NA | 1.39  | 0     |
| S2-final-viral-combined_k141_60484   | [full]   | 1369  | No  | NA  | 0 | 0 | Low-quality      | Genome-fragment | NA | 1.28  | 0     |
| S2-final-viral-combined_k141_132864  | [full]   | 1369  | No  | NA  | 1 | 0 | Low-quality      | Genome-fragment | NA | 1.02  | 0     |
| S6-final-viral-combined_k141_109738  | [full]   | 1369  | No  | NA  | 0 | 1 | Low-quality      | Genome-fragment | NA | 2.75  | 0     |
| S11-final-viral-combined_k141_304404 | [full]   | 1370  | No  | NA  | 0 | 0 | Low-quality      | Genome-fragment | NA | 0.98  | 0     |
| S1-final-viral-combined_k141_43587   | [full]   | 1040  | No  | NA  | 0 | 2 | Not-determined   | Genome-fragment | NA | 0     | 0     |
| S1-final-viral-combined_k141_357178  | [full]   | 3218  | No  | NA  | 0 | 1 | Not-determined   | Genome-fragment | NA | 0     | 0     |
| S1-final-viral-combined_k141_339423  | [full]   | 1635  | No  | NA  | 0 | 1 | Not-determined   | Genome-fragment | NA | 0     | 0     |
| S11_k141_310315                      |          | 1370  | No  | NA  | 0 | 0 | Low-quality      | Genome-fragment | NA | 1.12  | 0     |
| S1-final-viral-combined_k141_364587  | [full]   | 1370  | No  | NA  | 0 | 1 | Low-quality      | Genome-fragment | NA | 0.98  | 0     |
| S1-final-viral-combined_k141_335741  | [full]   | 1175  | No  | NA  | 0 | 1 | Not-determined   | Genome-fragment | NA | 0     | 0     |
| S1-final-viral-combined_k141_366313  | [full]   | 1370  | No  | NA  | 1 | 0 | Low-quality      | Genome-fragment | NA | 2.63  | 0     |
| S1-final-viral-combined_k141_43610   | [full]   | 1916  | No  | NA  | 0 | 0 | Not-determined   | Genome-fragment | NA | 0     | 0     |
| S1-final-viral-combined_k141_284338  | [full]   | 1370  | No  | NA  | 0 | 0 | Low-quality      | Genome-fragment | NA | 3.19  | 0     |
| S1-final-viral-combined_k141_30577   | [full]   | 1370  | No  | NA  | 0 | 0 | Low-quality      | Genome-fragment | NA | 0.11  | 0     |
| S1-final-viral-combined_k141_43614   | [full]   | 8848  | No  | NA  | 0 | 7 | Not-determined   | Genome-fragment | NA | 0     | 0     |
| S1_k141_142451                       |          | 1370  | No  | NA  | 2 | 0 | Low-quality      | Genome-fragment | NA | 3.41  | 0     |
| S5-final-viral-combined_k141_152610  | [full]   | 1370  | No  | NA  | 1 | 0 | Low-quality      | Genome-fragment | NA | 3.23  | 0     |
| S1-final-viral-combined_k141_225049  | [full]   | 2716  | No  | NA  | 0 | 2 | Not-determined   | Genome-fragment | NA | 0     | 0     |
| S7-final-viral-combined_k141_10772   | [full]   | 1370  | No  | NA  | 1 | 0 | Low-quality      | Genome-fragment | NA | 3.3   | 0     |
| S7-final-viral-combined_k141_50218   | [full]   | 1370  | No  | NA  | 0 | 0 | Low-quality      | Genome-fragment | NA | 2.11  | 0     |
| S7-final-viral-combined_k141_244328  | [full]   | 1370  | No  | NA  | 0 | 0 | Low-quality      | Genome-fragment | NA | 1.3   | 0     |
| S6-final-viral-combined_k141_33383   | [full]   | 1370  | No  | NA  | 0 | 0 | Low-quality      | Genome-fragment | NA | 3.99  | 0     |
| S8-final-viral-combined_k141_106898  | [full]   | 1370  | No  | NA  | 0 | 0 | Low-quality      | Genome-fragment | NA | 3.17  | 0     |
| S1-final-viral-combined_k141_43634   | [full]   | 4173  | No  | NA  | 0 | 1 | Not-determined   | Genome-fragment | NA | 0     | 0     |
| S8-final-viral-combined_k141_6781    | [full]   | 1370  | No  | NA  | 0 | 1 | Low-quality      | Genome-fragment | NA | 2.62  | 0     |
| S1-final-viral-combined_k141_339468  | [full]   | 9421  | No  | NA  | 0 | 7 | Not-determined   | Genome-fragment | NA | 0     | 0     |
| S1-final-viral-combined_k141_11155   | [full]   | 1816  | No  | NA  | 0 | 1 | Not-determined   | Genome-fragment | NA | 0     | 0     |
| S1-final-viral-combined_k141_259053  | [full]   | 2814  | No  | NA  | 0 | 1 | Not-determined   | Genome-fragment | NA | 0     | 0     |
| S3-final-viral-combined_k141_62370   | [H2gene] | 1371  | No  | NA  | 0 | 0 | Low-quality      | Genome-fragment | NA | 3.19  | 0     |
| S1-final-viral-combined_k141_76028   | [full]   | 2678  | No  | NA  | 0 | 2 | Not-determined   | Genome-fragment | NA | 0     | 0     |
| S1-final-viral-combined_k141_291106  | [full]   | 1048  | No  | NA  | 0 | 2 | Not-determined   | Genome-fragment | NA | 0     | 0     |
| S1-final-viral-combined_k141_339483  | [full]   | 1437  | No  | NA  | 0 | 0 | Not-determined   | Genome-fragment | NA | 0     | 0     |
| S5-final-viral-combined_k141_140824  | [full]   | 1371  | No  | NA  | 0 | 0 | Low-quality      | Genome-fragment | NA | 3.41  | 0     |
| S12-final-viral-combined_k141_106240 | [full]   | 1371  | No  | NA  | 0 | 0 | Low-quality      | Genome-fragment | NA | 0.7   | 0     |
| S1-final-viral-combined_k141_192842  | [full]   | 1530  | No  | NA  | 0 | 1 | Not-determined   | Genome-fragment | NA | 0     | 0     |
| S8-final-viral-combined_k141_246208  | [full]   | 1371  | No  | NA  | 0 | 0 | Low-quality      | Genome-fragment | NA | 0.74  | 0     |
| S1-final-viral-combined_k141_291171  | [full]   | 1345  | No  | NA  | 0 | 2 | Not-determined   | Genome-fragment | NA | 0     | 0     |
| S1-final-viral-combined_k141_241935  | [full]   | 2116  | No  | NA  | 0 | 2 | Not-determined   | Genome-fragment | NA | 0     | 0     |
| S8-final-viral-combined_k141_272042  | [H2gene] | 1371  | No  | NA  | 1 | 0 | Low-quality      | Genome-fragment | NA | 2.86  | 0     |
| S1-final-viral-combined_k141_142860  | [full]   | 2189  | No  | NA  | 0 | 2 | Not-determined   | Genome-fragment | NA | 0     | 0     |
| S1-final-viral-combined_k141_291153  | [full]   | 3375  | No  | NA  | 0 | 2 | Not-determined   | Genome-fragment | NA | 0     | 0     |
| S11-final-viral-combined_k141_197562 | [full]   | 1372  | No  | NA  | 0 | 0 | Low-quality      | Genome-fragment | NA | 1.09  | 0     |
| S11-final-viral-combined_k141_33155  | [full]   | 1372  | No  | NA  | 0 | 0 | Low-quality      | Genome-fragment | NA | 2.44  | 0     |
| S1-final-viral-combined_k141_308135  | [full]   | 7330  | No  | NA  | 0 | 0 | Not-determined   | Genome-fragment | NA | 0     | 0     |
| S11-final-viral-combined_k141_50081  | [full]   | 1372  | No  | NA  | 2 | 0 | Low-quality      | Genome-fragment | NA | 0.86  | 0     |
| S1-final-viral-combined_k141_244961  | [full]   | 1745  | No  | NA  | 0 | 1 | Not-determined   | Genome-fragment | NA | 0     | 0     |
| S11-final-viral-combined_k141_116144 | [H2gene] | 1372  | No  | NA  | 0 | 0 | Low-quality      | Genome-fragment | NA | 2.56  | 0     |
| S5-final-viral-combined_k141_206459  | [full]   | 1372  | No  | NA  | 1 | 0 | Low-quality      | Genome-fragment | NA | 2.55  | 0     |
| S1-final-viral-combined_k141_209536  | [full]   | 1246  | No  | NA  | 0 | 2 | Not-determined   | Genome-fragment | NA | 0     | 0     |
| S1-final-viral-combined_k141_27327   | [full]   | 1287  | No  | NA  | 0 | 0 | Not-determined   | Genome-fragment | NA | 0     | 0     |
| S1-final-viral-combined_k141_225210  | [full]   | 2134  | No  | NA  | 0 | 3 | Not-determined   | Genome-fragment | NA | 0     | 0     |
| S17-final-viral-combined_k141_172215 | [H2gene] | 1372  | No  | NA  | 1 | 0 | Low-quality      | Genome-fragment | NA | 1.22  | 0     |
| S17-final-viral-combined_k141_73341  | [H2gene] | 1372  | No  | NA  | 0 | 0 | Low-quality      | Genome-fragment | NA | 1.56  | 0     |
| S1-final-viral-combined_k141_308160  | [full]   | 7772  | No  | NA  | 0 | 4 | Not-determined   | Genome-fragment | NA | 0     | 0     |
| S17-k141_137054                      |          | 1372  | No  | NA  | 0 | 0 | Low-quality      | Genome-fragment | NA | 3.23  | 0     |
| S1-final-viral-combined_k141_43787   | [full]   | 1058  | No  | NA  | 0 | 2 | Not-determined   | Genome-fragment | NA | 0     | 0     |
| S1-final-viral-combined_k141_209571  | [full]   | 1260  | No  | NA  | 0 | 0 | Not-determined   | Genome-fragment | NA | 0     | 0     |
| S12-final-viral-combined_k141_47685  | [full]   | 1372  | Yes | 406 | 1 | 1 | Low-quality      | Genome-fragment | NA | 1.07  | 70.41 |
| S1-final-viral-combined_k141_158676  | [full]   | 3223  | No  | NA  | 0 | 1 | Not-determined   | Genome-fragment | NA | 0     | 0     |
| S1-final-viral-combined_k141_357373  | [full]   | 2966  | No  | NA  | 0 | 0 | Medium-quality   | Genome-fragment | NA | 53.65 | 0     |
| S6_k141_67651                        |          | 1372  | No  | NA  | 0 | 0 | Low-quality      | Genome-fragment | NA | 1.08  | 0     |
| S1-final-viral-combined_k141_357408  | [full]   | 2120  | No  | NA  | 0 | 1 | Not-determined   | Genome-fragment | NA | 0     | 0     |
| S8-final-viral-combined_k141_245718  | [full]   | 1372  | No  | NA  | 0 | 0 | Low-quality      | Genome-fragment | NA | 3.12  | 0     |
| S1-final-viral-combined_k141_339560  | [full]   | 2117  | No  | NA  | 0 | 0 | Not-determined   | Genome-fragment | NA | 0     | 0     |
| S1-final-viral-combined_k141_225273  | [full]   | 1510  | No  | NA  | 0 | 1 | Not-determined   | Genome-fragment | NA | 0     | 0     |
| S1-final-viral-combined_k141_373226  | [full]   | 1167  | No  | NA  | 0 | 0 | Not-determined   | Genome-fragment | NA | 0     | 0     |
| S8-final-viral-combined_k141_232377  | [full]   | 1372  | No  | NA  | 0 | 0 | Low-quality      | Genome-fragment | NA | 3.08  | 0     |
| S1-final-viral-combined_k141_158702  | [full]   | 3677  | No  | NA  | 0 | 0 | Not-determined   | Genome-fragment | NA | 0     | 0     |
| S1-final-viral-combined_k141_357424  | [full]   | 2052  | No  | NA  | 0 | 0 | Not-determined   | Genome-fragment | NA | 0     | 0     |
| S8_k141_63009                        |          | 1372  | No  | NA  | 0 | 0 | Low-quality      | Genome-fragment | NA | 2.27  | 0     |
| S1-final-viral-combined_k141_49799   | [full]   | 1373  | No  | NA  | 0 | 0 | Low-quality      | Genome-fragment | NA | 4.02  | 0     |
| S1-final-viral-combined_k141_124868  | [full]   | 1373  | No  | NA  | 0 | 2 | Low-quality      | Genome-fragment | NA | 1.87  | 0     |
| S12_k141_119212                      |          | 1373  | No  | NA  | 0 | 0 | Low-quality      | Genome-fragment | NA | 2.96  | 0     |
| S1-final-viral-combined_k141_109055  | [full]   | 2786  | No  | NA  | 0 | 3 | Not-determined   | Genome-fragment | NA | 0     | 0     |
| S1-final-viral-combined_k141_373236  | [full]   | 1699  | No  | NA  | 0 | 1 | Not-determined   | Genome-fragment | NA | 0     | 0     |
| S5-final-viral-combined_k141_137903  | [H2gene] | 1373  | No  | NA  | 1 | 0 | Low-quality      | Genome-fragment | NA | 3.04  | 0     |
| S7-final-viral-combined_k141_219758  | [full]   | 1373  | No  | NA  | 0 | 0 | Low-quality      | Genome-fragment | NA | 2.44  | 0     |
| S17-k141_8488                        |          | 1373  | No  | NA  | 1 | 0 | Low-quality      | Genome-fragment | NA | 0.79  | 0     |
| S1-final-viral-combined_k141_11293   | [full]   | 1122  | No  | NA  | 0 | 0 | Not-determined   | Genome-fragment | NA | 0     | 0     |
| S1-final-viral-combined_k141_142988  | [full]   | 1586  | No  | NA  | 0 | 0 | Not-determined   | Genome-fragment | NA | 0     | 0     |
| S1-final-viral-combined_k141_142995  | [full]   | 1088  | No  | NA  | 0 | 0 | Not-determined   | Genome-fragment | NA | 0     | 0     |
| S12-final-viral-combined_k141_398105 | [H2gene] | 1373  | No  | NA  | 1 | 0 | Low-quality      | Genome-fragment | NA | 2.24  | 0     |
| S2-final-viral-combined_k141_151215  | [full]   | 1373  | No  | NA  | 0 | 0 | Low-quality      | Genome-fragment | NA | 0.89  | 0     |
| S1-final-viral-combined_k141_27433   | [full]   | 1540  | No  | NA  | 0 | 0 | Not-determined   | Genome-fragment | NA | 0     | 0     |
| S8-final-viral-combined_k141_201866  | [full]   | 1373  | No  | NA  | 0 | 0 | Low-quality      | Genome-fragment | NA | 2.14  | 0     |
| S8_k141_40984                        |          | 1373  | No  | NA  | 0 | 1 | Low-quality      | Genome-fragment | NA | 1.3   | 0     |
| S9-final-viral-combined_k141_12024   | [full]   | 1374  | No  | NA  | 1 | 0 | Low-quality      | Genome-fragment | NA | 1.58  | 0     |
| S1-final-viral-combined_k141_127534  | [full]   | 1327  | No  | NA  | 0 | 0 | Not-determined   | Genome-fragment | NA | 0     | 0     |
| S1-final-viral-combined_k141_389654  | [full]   | 1464  | No  | NA  | 0 | 1 | Not-determined   | Genome-fragment | NA | 0     | 0     |
| S11_k141_37713                       |          | 1374  | No  | NA  | 0 | 0 | Low-quality      | Genome-fragment | NA | 1.42  | 0     |
| S1-final-viral-combined_k141_127181  | [full]   | 1374  | No  | NA  | 0 | 1 | Low-quality      | Genome-fragment | NA | 0.35  | 0     |
| S1-final-viral-combined_k141_66885   | [full]   | 1374  | No  | NA  | 1 | 0 | Low-quality      | Genome-fragment | NA | 4.24  | 0     |
| S1-final-viral-combined_k141_174918  | [full]   | 1044  | No  | NA  | 0 | 1 | Not-determined   | Genome-fragment | NA | 0     | 0     |
| S1-final-viral-combined_k141_76289   | [full]   | 1406  | No  | NA  | 0 | 0 | Not-determined   | Genome-fragment | NA | 0     | 0     |
| S1-final-viral-combined_k141_389674  | [full]   | 1513  | No  | NA  | 0 | 0 | Not-determined   | Genome-fragment | NA | 0     | 0     |
| S1-final-viral-combined_k141_291405  | [full]   | 1808  | No  | NA  | 0 | 2 | Not-determined   | Genome-fragment | NA | 0     | 0     |
| S1_k141_251897                       |          | 1374  | No  | NA  | 0 | 0 | Low-quality      | Genome-fragment | NA | 1.3   | 0     |
| S1-final-viral-combined_k141_373308  | [full]   | 14841 | No  | NA  | 1 | 6 | High-quality     | Genome-fragment | NA | 100   | 0     |
| S7-final-viral-combined_k141_37086   | [full]   | 1374  | No  | NA  | 0 | 0 | Low-quality      | Genome-fragment | NA | 3.19  | 0     |
| S1-final-viral-combined_k141_339489  | [full]   | 2152  | No  | NA  | 0 | 0 | Not-determined   | Genome-fragment | NA | 0     | 0     |
| S1-final-viral-combined_k141_33952   | [full]   | 1245  | No  | NA  | 0 | 3 | Not-determined   | Genome-fragment | NA | 0     | 0     |
| S1-final-viral-combined_k141_325093  | [full]   | 3682  | No  | NA  | 0 | 2 | Not-determined   | Genome-fragment | NA | 0     | 0     |
| S17-final-viral-combined_k141_186018 | [full]   | 1374  | No  | NA  | 0 | 0 | Low-quality      | Genome-fragment | NA | 1.63  | 0     |
| S1-final-viral-combined_k141_373316  | [full]   | 1320  | No  | NA  | 0 | 0 | Not-determined   | Genome-fragment | NA | 0     | 0     |
| S12-final-viral-combined_k141_157741 | [full]   | 1374  | No  | NA  | 0 | 0 | Low-quality      | Genome-fragment | NA | 0.4   | 0     |
| S1-final-viral-combined_k141_226467  | [full]   | 1651  | No  | NA  | 0 | 0 | Not-determined   | Genome-fragment | NA | 0     | 0     |
| S12-final-viral-combined_k141_315164 | [H2gene] | 1374  | No  | NA  | 1 | 0 | Low-quality      | Genome-fragment | NA | 3.42  | 0     |
| S1-final-viral-combined_k141_357597  | [full]   | 2816  | No  | NA  | 0 | 0 | Not-determined   | Genome-fragment | NA | 0     | 0     |
| S12_k141_251859                      |          | 1374  | No  | NA  | 0 | 1 | Low-quality      | Genome-fragment | NA | 1.09  | 0     |
| S1-final-viral-combined_k141_109189  | [full]   | 1068  | No  | NA  | 0 | 0 | Not-determined   | Genome-fragment | NA | 0     | 0     |
| S1-final                             |          |       |     |     |   |   |                  |                 |    |       |       |



|                                        |         |       |     |      |   |    |                |                 |    |       |
|----------------------------------------|---------|-------|-----|------|---|----|----------------|-----------------|----|-------|
| S1-final-viral-combined_k141_291710]]  | [full]  | 3103  | No  | NA   | 0 | 1  | Not-determined | Genome-fragment | NA | 0     |
| S1-final-viral-combined_k141_259470]]  | [full]  | 1284  | No  | NA   | 0 | 0  | Not-determined | Genome-fragment | NA | 0     |
| S1-final-viral-combined_k141_175193]]  | [full]  | 1291  | No  | NA   | 0 | 1  | Not-determined | Genome-fragment | NA | 0     |
| S11-final-viral-combined_k141_322564]] | [H2gene | 1376  | No  | NA   | 1 | 0  | Low-quality    | Genome-fragment | NA | 0.95  |
| S1-final-viral-combined_k141_325353]]  | [full]  | 1454  | No  | NA   | 0 | 1  | Not-determined | Genome-fragment | NA | 0     |
| S1_k141_17429                          |         | 1376  | No  | NA   | 0 | 2  | Low-quality    | Genome-fragment | NA | 4.14  |
| S1-final-viral-combined_k141_193427]]  | [full]  | 1260  | No  | NA   | 0 | 0  | Not-determined | Genome-fragment | NA | 0     |
| S1-final-viral-combined_k141_295508]]  | [full]  | 1693  | No  | NA   | 0 | 2  | Not-determined | Genome-fragment | NA | 0     |
| S5-final-viral-combined_k141_44601]]   | [full]  | 1376  | No  | NA   | 0 | 0  | Low-quality    | Genome-fragment | NA | 3.76  |
| S1-final-viral-combined_k141_94257]]   | [full]  | 6577  | No  | NA   | 0 | 5  | Not-determined | Genome-fragment | NA | 0     |
| S7-final-viral-combined_k141_70393]]   | [full]  | 1376  | Yes | 1127 | 1 | 1  | Low-quality    | Genome-fragment | NA | 2.26  |
| S1-final-viral-combined_k141_109420]]  | [full]  | 2798  | No  | NA   | 1 | 0  | Not-determined | Genome-fragment | NA | 0     |
| S2-final-viral-combined_k141_134805]]  | [full]  | 1376  | No  | NA   | 0 | 0  | Low-quality    | Genome-fragment | NA | 3.26  |
| S1-final-viral-combined_k141_143382]]  | [full]  | 5793  | No  | NA   | 0 | 1  | Not-determined | Genome-fragment | NA | 0     |
| S1-final-viral-combined_k141_94270]]   | [full]  | 1817  | No  | NA   | 0 | 3  | Not-determined | Genome-fragment | NA | 0     |
| S1-final-viral-combined_k141_308595]]  | [full]  | 2257  | No  | NA   | 0 | 3  | Not-determined | Genome-fragment | NA | 0     |
| S1-final-viral-combined_k141_291803]]  | [full]  | 1933  | No  | NA   | 0 | 0  | Not-determined | Genome-fragment | NA | 0     |
| S1-final-viral-combined_k141_143404]]  | [full]  | 1635  | No  | NA   | 0 | 1  | Not-determined | Genome-fragment | NA | 0     |
| S2-final-viral-combined_k141_93690]]   | [full]  | 1376  | No  | NA   | 1 | 0  | Low-quality    | Genome-fragment | NA | 2.03  |
| S2_k141_134971                         |         | 1376  | No  | NA   | 0 | 0  | Low-quality    | Genome-fragment | NA | 2.24  |
| S1-final-viral-combined_k141_11616]]   | [full]  | 8251  | No  | NA   | 0 | 2  | Not-determined | Genome-fragment | NA | 2.02  |
| S4-final-viral-combined_k141_70266]]   | [full]  | 1376  | No  | NA   | 0 | 0  | Low-quality    | Genome-fragment | NA | 0     |
| S1-final-viral-combined_k141_259602]]  | [full]  | 3074  | No  | NA   | 0 | 0  | Not-determined | Genome-fragment | NA | 0     |
| S8-final-viral-combined_k141_242716]]  | [full]  | 1376  | No  | NA   | 0 | 1  | Low-quality    | Genome-fragment | NA | 0.44  |
| S11-final-viral-combined_k141_91314]]  | [full]  | 1377  | No  | NA   | 0 | 0  | Low-quality    | Genome-fragment | NA | 3.22  |
| S11-final-viral-combined_k141_260295]] | [H2gene | 1377  | No  | NA   | 1 | 0  | Low-quality    | Genome-fragment | NA | 3.83  |
| S1-final-viral-combined_k141_76546]]   | [full]  | 17519 | No  | NA   | 0 | 10 | Not-determined | Genome-fragment | NA | 0     |
| S1-final-viral-combined_k141_76548]]   | [full]  | 1438  | No  | NA   | 0 | 0  | Not-determined | Genome-fragment | NA | 0     |
| S1-final-viral-combined_k141_133409]]  | [H2gene | 1377  | No  | NA   | 0 | 0  | Low-quality    | Genome-fragment | NA | 3.05  |
| S1-final-viral-combined_k141_255271]]  | [H2gene | 1377  | No  | NA   | 1 | 0  | Low-quality    | Genome-fragment | NA | 3.9   |
| S5-final-viral-combined_k141_90268]]   | [full]  | 1377  | No  | NA   | 0 | 0  | Low-quality    | Genome-fragment | NA | 3.13  |
| S1-final-viral-combined_k141_143459]]  | [full]  | 35960 | No  | NA   | 2 | 1  | Medium-quality | Genome-fragment | NA | 77.24 |
| S5-final-viral-combined_k141_161464]]  | [full]  | 1377  | No  | NA   | 1 | 0  | Low-quality    | Genome-fragment | NA | 1.26  |
| S7_k141_193569                         |         | 1377  | No  | NA   | 0 | 1  | Low-quality    | Genome-fragment | NA | 2.09  |
| S1-final-viral-combined_k141_193234]]  | [full]  | 2395  | No  | NA   | 0 | 2  | Not-determined | Genome-fragment | NA | 0     |
| S1-final-viral-combined_k141_900031]]  | [full]  | 1120  | No  | NA   | 0 | 0  | Not-determined | Genome-fragment | NA | 0     |
| S17-final-viral-combined_k141_148219]] | [full]  | 1377  | No  | NA   | 0 | 0  | Low-quality    | Genome-fragment | NA | 3.54  |
| S17-final-viral-combined_k141_194216]] | [full]  | 1377  | No  | NA   | 0 | 1  | Low-quality    | Genome-fragment | NA | 0.86  |
| S12-final-viral-combined_k141_396379]] | [full]  | 1377  | No  | NA   | 0 | 0  | Low-quality    | Genome-fragment | NA | 2.1   |
| S1-final-viral-combined_k141_175346]]  | [full]  | 1046  | No  | NA   | 0 | 0  | Not-determined | Genome-fragment | NA | 0     |
| S1-final-viral-combined_k141_171704]]  | [full]  | 1795  | No  | NA   | 0 | 0  | Not-determined | Genome-fragment | NA | 0     |
| S1-final-viral-combined_k141_235510]]  | [full]  | 1748  | No  | NA   | 0 | 2  | Not-determined | Genome-fragment | NA | 0     |
| S1-final-viral-combined_k141_109586]]  | [full]  | 5043  | No  | NA   | 0 | 4  | Not-determined | Genome-fragment | NA | 0     |
| S1-final-viral-combined_k141_259664]]  | [full]  | 5143  | No  | NA   | 0 | 0  | Not-determined | Genome-fragment | NA | 0     |
| S1-final-viral-combined_k141_259667]]  | [full]  | 2235  | No  | NA   | 0 | 0  | Not-determined | Genome-fragment | NA | 0     |
| S1-final-viral-combined_k141_274731]]  | [full]  | 3235  | No  | NA   | 0 | 1  | Not-determined | Genome-fragment | NA | 0     |
| S2-final-viral-combined_k141_137449]]  | [full]  | 1377  | No  | NA   | 0 | 0  | Low-quality    | Genome-fragment | NA | 1.24  |
| S1-final-viral-combined_k141_94446]]   | [full]  | 1551  | No  | NA   | 0 | 0  | Not-determined | Genome-fragment | NA | 0     |
| S1-final-viral-combined_k141_339904]]  | [full]  | 2733  | No  | NA   | 0 | 2  | Not-determined | Genome-fragment | NA | 0     |
| S2-final-viral-combined_k141_75075]]   | [full]  | 1377  | No  | NA   | 0 | 1  | Low-quality    | Genome-fragment | NA | 3.35  |
| S11-final-viral-combined_k141_22425]]  | [full]  | 1378  | No  | NA   | 0 | 2  | Low-quality    | Genome-fragment | NA | 0.97  |
| S1-final-viral-combined_k141_370906]]  | [full]  | 1378  | No  | NA   | 0 | 2  | Low-quality    | Genome-fragment | NA | 0.8   |
| S5-final-viral-combined_k141_129310]]  | [full]  | 1378  | No  | NA   | 0 | 1  | Low-quality    | Genome-fragment | NA | 0.71  |
| S1-final-viral-combined_k141_308752]]  | [full]  | 1352  | No  | NA   | 0 | 2  | Not-determined | Genome-fragment | NA | 0     |
| S1-final-viral-combined_k141_11754]]   | [full]  | 1912  | No  | NA   | 1 | 1  | Not-determined | Genome-fragment | NA | 0     |
| S1-final-viral-combined_k141_24448]]   | [full]  | 1246  | No  | NA   | 0 | 1  | Not-determined | Genome-fragment | NA | 0     |
| S1-final-viral-combined_k141_339949]]  | [full]  | 2358  | No  | NA   | 0 | 1  | Not-determined | Genome-fragment | NA | 0     |
| S7_k141_243494                         |         | 1378  | No  | NA   | 0 | 0  | Low-quality    | Genome-fragment | NA | 0.52  |
| S1-final-viral-combined_k141_76632]]   | [full]  | 1064  | No  | NA   | 0 | 1  | Not-determined | Genome-fragment | NA | 0     |
| S1-final-viral-combined_k141_11768]]   | [full]  | 2216  | No  | NA   | 0 | 1  | Not-determined | Genome-fragment | NA | 0     |
| S1-final-viral-combined_k141_259730]]  | [full]  | 1325  | No  | NA   | 0 | 0  | Not-determined | Genome-fragment | NA | 0     |
| S1-final-viral-combined_k141_235510]]  | [full]  | 2718  | No  | NA   | 0 | 0  | Not-determined | Genome-fragment | NA | 0     |
| S12-final-viral-combined_k141_225055]] | [full]  | 1378  | No  | NA   | 0 | 0  | Low-quality    | Genome-fragment | NA | 1.97  |
| S1-final-viral-combined_k141_292019]]  | [full]  | 1599  | No  | NA   | 0 | 1  | Not-determined | Genome-fragment | NA | 0     |
| S1-final-viral-combined_k141_339976]]  | [full]  | 4809  | No  | NA   | 0 | 4  | Not-determined | Genome-fragment | NA | 0     |
| S1-final-viral-combined_k141_159242]]  | [full]  | 1339  | No  | NA   | 0 | 2  | Not-determined | Genome-fragment | NA | 0     |
| S1-final-viral-combined_k141_225915]]  | [full]  | 1333  | No  | NA   | 0 | 1  | Not-determined | Genome-fragment | NA | 0     |
| S1-final-viral-combined_k141_225915]]  | [full]  | 2429  | No  | NA   | 0 | 1  | Not-determined | Genome-fragment | NA | 0     |
| S1-final-viral-combined_k141_242325]]  | [full]  | 1637  | No  | NA   | 0 | 1  | Not-determined | Genome-fragment | NA | 0     |
| S1-final-viral-combined_k141_40006]]   | [full]  | 1004  | No  | NA   | 0 | 1  | Not-determined | Genome-fragment | NA | 0     |
| S1-final-viral-combined_k141_109670]]  | [full]  | 1883  | No  | NA   | 0 | 0  | Not-determined | Genome-fragment | NA | 0     |
| S1-final-viral-combined_k141_175395]]  | [full]  | 4979  | No  | NA   | 0 | 2  | Not-determined | Genome-fragment | NA | 0     |
| S1-final-viral-combined_k141_44463]]   | [full]  | 1910  | No  | NA   | 0 | 3  | Not-determined | Genome-fragment | NA | 0     |
| S2-final-viral-combined_k141_10340]]   | [H2gene | 1378  | No  | NA   | 1 | 0  | Low-quality    | Genome-fragment | NA | 2.77  |
| S1-final-viral-combined_k141_28078]]   | [full]  | 1635  | No  | NA   | 0 | 0  | Not-determined | Genome-fragment | NA | 0     |
| S1-final-viral-combined_k141_193687]]  | [full]  | 5738  | No  | NA   | 0 | 5  | Not-determined | Genome-fragment | NA | 0     |
| S6-final-viral-combined_k141_30098]]   | [full]  | 1378  | No  | NA   | 1 | 0  | Low-quality    | Genome-fragment | NA | 2.03  |
| S8_k141_117153                         |         | 1378  | No  | NA   | 1 | 0  | Low-quality    | Genome-fragment | NA | 1.89  |
| S1-final-viral-combined_k141_94540]]   | [full]  | 3044  | No  | NA   | 0 | 1  | Not-determined | Genome-fragment | NA | 0     |
| S1-final-viral-combined_k141_390159]]  | [full]  | 8356  | No  | NA   | 0 | 7  | Not-determined | Genome-fragment | NA | 0     |
| S8_k141_129494                         |         | 1378  | No  | NA   | 0 | 0  | Low-quality    | Genome-fragment | NA | 0.73  |
| S1-final-viral-combined_k141_159314]]  | [full]  | 9804  | No  | NA   | 0 | 3  | Not-determined | Genome-fragment | NA | 0     |
| S1-final-viral-combined_k141_175425]]  | [full]  | 3175  | No  | NA   | 0 | 3  | Not-determined | Genome-fragment | NA | 0     |
| S9-final-viral-combined_k141_74571]]   | [full]  | 1379  | No  | NA   | 3 | 0  | Low-quality    | Genome-fragment | NA | 4.33  |
| S1-final-viral-combined_k141_208848]]  | [full]  | 21928 | No  | NA   | 0 | 2  | Medium-quality | Genome-fragment | NA | 66.34 |
| S1-final-viral-combined_k141_175439]]  | [full]  | 1526  | No  | NA   | 0 | 0  | Not-determined | Genome-fragment | NA | 0     |
| S11-final-viral-combined_k141_23772]]  | [full]  | 1379  | No  | NA   | 0 | 0  | Low-quality    | Genome-fragment | NA | 2.18  |
| S2-final-viral-combined_k141_188216]]  | [full]  | 1379  | No  | NA   | 0 | 0  | Low-quality    | Genome-fragment | NA | 3.27  |
| S1-final-viral-combined_k141_373837]]  | [full]  | 2562  | No  | NA   | 0 | 2  | Not-determined | Genome-fragment | NA | 0     |
| S7-final-viral-combined_k141_70294]]   | [full]  | 1379  | No  | NA   | 0 | 0  | Low-quality    | Genome-fragment | NA | 2.1   |
| S7_k141_155732                         |         | 1379  | No  | NA   | 0 | 0  | Low-quality    | Genome-fragment | NA | 1.3   |
| S2_k141_58521                          |         | 1379  | No  | NA   | 0 | 1  | Low-quality    | Genome-fragment | NA | 1.37  |
| S6-final-viral-combined_k141_77524]]   | [full]  | 1379  | No  | NA   | 0 | 0  | Low-quality    | Genome-fragment | NA | 1.64  |
| S1-final-viral-combined_k141_308897]]  | [full]  | 1427  | No  | NA   | 0 | 2  | Not-determined | Genome-fragment | NA | 0     |
| S1-final-viral-combined_k141_346060]]  | [full]  | 4172  | No  | NA   | 0 | 0  | Not-determined | Genome-fragment | NA | 0     |
| S9-final-viral-combined_k141_54509]]   | [full]  | 1380  | No  | NA   | 0 | 0  | Low-quality    | Genome-fragment | NA | 2.94  |
| S1-final-viral-combined_k141_292137]]  | [full]  | 2464  | No  | NA   | 0 | 1  | Not-determined | Genome-fragment | NA | 0     |
| S1-final-viral-combined_k141_259876]]  | [full]  | 2698  | No  | NA   | 0 | 2  | Not-determined | Genome-fragment | NA | 0     |
| S1-final-viral-combined_k141_143736]]  | [full]  | 1458  | No  | NA   | 0 | 0  | Not-determined | Genome-fragment | NA | 0     |
| S3-final-viral-combined_k141_39223]]   | [H2gene | 1380  | No  | NA   | 1 | 0  | Low-quality    | Genome-fragment | NA | 1.29  |
| S1-final-viral-combined_k141_76819]]   | [full]  | 3399  | No  | NA   | 0 | 1  | Not-determined | Genome-fragment | NA | 0     |
| S7_k141_134603                         |         | 1380  | No  | NA   | 0 | 1  | Low-quality    | Genome-fragment | NA | 3.07  |
| S1-final-viral-combined_k141_340119]]  | [full]  | 2185  | No  | NA   | 0 | 0  | Not-determined | Genome-fragment | NA | 0     |
| S1-final-viral-combined_k141_358290]]  | [full]  | 7925  | No  | NA   | 0 | 2  | Not-determined | Genome-fragment | NA | 0     |
| S17-final-viral-combined_k141_124786]] | [full]  | 1380  | No  | NA   | 0 | 0  | Low-quality    | Genome-fragment | NA | 1.8   |
| S1-final-viral-combined_k141_325744]]  | [full]  | 2600  | No  | NA   | 1 | 0  | Not-determined | Genome-fragment | NA | 0     |
| S1-final-viral-combined_k141_292172]]  | [full]  | 3553  | No  | NA   | 0 | 0  | Not-determined | Genome-fragment | NA | 0     |
| S1-final-viral-combined_k141_109782]]  | [full]  | 1092  | No  | NA   | 2 | 1  | Not-determined | Genome-fragment | NA | 0     |
| S17-final-viral-combined_k141_117193]] | [full]  | 1380  | No  | NA   | 2 | 0  | Low-quality    | Genome-fragment | NA | 1.47  |
| S1-final-viral-combined_k141_94640]]   | [full]  | 1858  | No  | NA   | 0 | 2  | Not-determined | Genome-fragment | NA | 0     |
| S1-final-viral-combined_k141_32570]]   | [full]  | 1456  | No  | NA   | 0 | 0  | Not-determined | Genome-fragment | NA | 0     |
| S1-final-viral-combined_k141_119714]]  | [full]  | 2796  | No  | NA   | 0 | 2  | Not-determined | Genome-fragment | NA | 0     |
| S17-final-viral-combined_k141_132250]] | [full]  | 1380  | No  | NA   | 0 | 0  | Low-quality    | Genome-fragment | NA | 3.38  |
| S1-final-viral-combined_k141_226060]]  | [full]  | 2384  | No  | NA   | 0 | 0  | Not-determined | Genome-fragment | NA | 0     |
| S1-final-viral-combined_k141_274988]]  | [full]  | 3811  | No  | NA   | 0 | 2  | Not-determined | Genome-fragment | NA | 0     |
| S1-final-viral-combined_k141_76919]]   | [full]  | 1837  | No  | NA   | 0 | 0  | Not-determined | Genome-fragment | NA | 0     |
| S17-k141_144452                        |         | 1380  | No  | NA   | 0 | 0  | Low-quality    | Genome-fragment | NA | 3     |
| S1-final-viral-combined_k141_275003]]  | [full]  | 2284  | No  | NA   | 0 | 2  | Not-determined | Genome-fragment | NA | 0     |
| S1-final-viral-combined_k141_292254]]  | [full]  | 2197  | No  | NA   | 0 | 2  | Not-determined | Genome-fragment | NA | 0     |
| S1-final-viral-combined_k141_109895]]  | [full]  | 2438  | No  | NA   | 0 | 2  | Not-determined | Genome-fragment | NA | 0     |
| S12-final-viral-combined_k141_143272]] | [full]  | 1380  | No  | NA   | 0 | 1  | Low-quality    | Genome-fragment | NA | 1.24  |
| S1-final-viral-combined_k141_128107]]  | [full]  | 1504  | No  | NA   | 0 | 0  | Not-determined | Genome-fragment | NA | 0     |
| S1-final-viral-combined_k141_340220]]  | [full]  | 1364  | No  | NA   | 0 | 1  | Not-determined | Genome-fragment | NA | 0     |
| S2-final-viral-combined_k141_74355]]   | [full]  | 1380  | No  | NA   | 0 | 0  | Low-quality    | Genome-fragment | NA | 1.29  |
| S1-final-viral-combined_k141_235836]]  | [full]  | 1102  | No  | NA   | 0 | 1  | Not-determined | Genome-fragment | NA | 0     |
| S1-final-viral-combined_k141_374057]]  | [full]  | 4007  | No  | NA   | 0 | 2  | Not-determined | Genome-fragment | NA | 0     |
| S1-final-viral-combined_k141_259967]]  | [full]  | 1129  | No  | NA   | 0 | 2  | Not-determined | Genome-fragment | NA | 0     |
| S1-final-viral-combined_k141_76963]]   | [full]  | 6215  | No  | NA   | 0 | 0  | Not-determined | Genome-fragment | NA | 0     |
| S2-final-viral-combined_k141_55168]]   | [full]  | 1380  | No  | NA   | 0 | 2  | Low-quality    |                 |    |       |



|                                      |          |       |     |     |   |    |                |                 |    |       |
|--------------------------------------|----------|-------|-----|-----|---|----|----------------|-----------------|----|-------|
| S1-final-viral-combined_k141_292516  | [full]   | 4391  | No  | NA  | 0 | 3  | Not-determined | Genome-fragment | NA | 0     |
| S1-final-viral-combined_k141_358603  | [full]   | 3643  | No  | NA  | 0 | 0  | Not-determined | Genome-fragment | NA | 0     |
| S1-final-viral-combined_k141_144089  | [full]   | 1089  | No  | NA  | 0 | 0  | Not-determined | Genome-fragment | NA | 0     |
| S1-final-viral-combined_k141_242932  | [full]   | 1500  | No  | NA  | 0 | 0  | Not-determined | Genome-fragment | NA | 0     |
| S1-final-viral-combined_k141_144092  | [full]   | 4427  | No  | NA  | 0 | 4  | Not-determined | Genome-fragment | NA | 0     |
| S1-final-viral-combined_k141_390566  | [full]   | 1063  | No  | NA  | 0 | 0  | Not-determined | Genome-fragment | NA | 0     |
| S11-final-viral-combined_k141_288604 | [full]   | 1382  | No  | NA  | 0 | 1  | Low-quality    | Genome-fragment | NA | 0.99  |
| S1-final-viral-combined_k141_193884  | [full]   | 3087  | No  | NA  | 0 | 1  | Not-determined | Genome-fragment | NA | 0     |
| S1-final-viral-combined_k141_366577  | [full]   | 1382  | No  | NA  | 0 | 0  | Low-quality    | Genome-fragment | NA | 2.36  |
| S1-final-viral-combined_k141_340436  | [full]   | 1295  | No  | NA  | 0 | 0  | Not-determined | Genome-fragment | NA | 0     |
| S1-final-viral-combined_k141_77188   | [full]   | 11572 | No  | NA  | 0 | 0  | Not-determined | Genome-fragment | NA | 0     |
| S1-final-viral-combined_k141_30233   | [full]   | 1382  | No  | NA  | 0 | 0  | Low-quality    | Genome-fragment | NA | 2.47  |
| S9_k141_53944                        |          | 1382  | No  | NA  | 1 | 0  | Low-quality    | Genome-fragment | NA | 0.8   |
| S9_k141_96758                        |          | 1382  | No  | NA  | 0 | 1  | Low-quality    | Genome-fragment | NA | 0.87  |
| S9_k141_12095                        |          | 1382  | No  | NA  | 0 | 0  | Low-quality    | Genome-fragment | NA | 0.64  |
| S1-final-viral-combined_k141_61626   | [full]   | 7167  | No  | NA  | 0 | 7  | Not-determined | Genome-fragment | NA | 0     |
| S7-final-viral-combined_k141_179588  | [full]   | 1382  | No  | NA  | 1 | 0  | Low-quality    | Genome-fragment | NA | 1.73  |
| S1-final-viral-combined_k141_12453   | [full]   | 2574  | No  | NA  | 0 | 1  | Not-determined | Genome-fragment | NA | 0     |
| S1-final-viral-combined_k141_12826   | [full]   | 1956  | No  | NA  | 0 | 0  | Not-determined | Genome-fragment | NA | 0     |
| S1-final-viral-combined_k141_159670  | [full]   | 6533  | No  | NA  | 0 | 3  | Not-determined | Genome-fragment | NA | 0     |
| S7-final-viral-combined_k141_9328    | [full]   | 1382  | No  | NA  | 0 | 2  | Low-quality    | Genome-fragment | NA | 0.44  |
| S17-final-viral-combined_k141_29947  | [full]   | 1382  | No  | NA  | 0 | 2  | Low-quality    | Genome-fragment | NA | 0.49  |
| S1-final-viral-combined_k141_260367  | [full]   | 1150  | No  | NA  | 0 | 0  | Not-determined | Genome-fragment | NA | 0     |
| S1-final-viral-combined_k141_358777  | [full]   | 1773  | No  | NA  | 0 | 1  | Not-determined | Genome-fragment | NA | 0     |
| S2-final-viral-combined_k141_128512  | [H2gene] | 1382  | No  | NA  | 0 | 1  | Low-quality    | Genome-fragment | NA | 1.68  |
| S8-final-viral-combined_k141_201279  | [full]   | 1382  | No  | NA  | 0 | 0  | Low-quality    | Genome-fragment | NA | 2.69  |
| S1-final-viral-combined_k141_61657   | [full]   | 4586  | No  | NA  | 0 | 2  | Not-determined | Genome-fragment | NA | 0     |
| S1-final-viral-combined_k141_390677  | [full]   | 2078  | No  | NA  | 0 | 1  | Not-determined | Genome-fragment | NA | 0     |
| S1-final-viral-combined_k141_144171  | [full]   | 3511  | No  | NA  | 0 | 1  | Not-determined | Genome-fragment | NA | 0     |
| S1-final-viral-combined_k141_94851   | [full]   | 1587  | No  | NA  | 0 | 0  | Not-determined | Genome-fragment | NA | 0     |
| S11-final-viral-combined_k141_201164 | [H2gene] | 1383  | No  | NA  | 2 | 0  | Low-quality    | Genome-fragment | NA | 4.31  |
| S1-final-viral-combined_k141_326166  | [full]   | 9513  | No  | NA  | 0 | 7  | Not-determined | Genome-fragment | NA | 0     |
| S1-final-viral-combined_k141_358813  | [full]   | 1412  | No  | NA  | 0 | 0  | Not-determined | Genome-fragment | NA | 0     |
| S7-final-viral-combined_k141_56638   | [full]   | 1383  | No  | NA  | 0 | 0  | Low-quality    | Genome-fragment | NA | 2.16  |
| S1-final-viral-combined_k141_159711  | [full]   | 1615  | No  | NA  | 0 | 1  | Not-determined | Genome-fragment | NA | 0     |
| S1-final-viral-combined_k141_45039   | [full]   | 1776  | No  | NA  | 0 | 1  | Not-determined | Genome-fragment | NA | 0     |
| S17-final-viral-combined_k141_180519 | [full]   | 1383  | No  | NA  | 0 | 0  | Low-quality    | Genome-fragment | NA | 3.27  |
| S1-final-viral-combined_k141_216517  | [full]   | 1212  | No  | NA  | 0 | 1  | Not-determined | Genome-fragment | NA | 0     |
| S1-final-viral-combined_k141_110041  | [full]   | 2056  | No  | NA  | 0 | 2  | Not-determined | Genome-fragment | NA | 0     |
| S17-final-viral-combined_k141_39093  | [full]   | 1383  | No  | NA  | 2 | 0  | Low-quality    | Genome-fragment | NA | 3.18  |
| S17_k141_30728                       |          | 1383  | No  | NA  | 1 | 0  | Low-quality    | Genome-fragment | NA | 3.89  |
| S1-final-viral-combined_k141_374392  | [full]   | 1200  | No  | NA  | 0 | 1  | Not-determined | Genome-fragment | NA | 0     |
| S1-final-viral-combined_k141_159733  | [full]   | 1456  | No  | NA  | 0 | 1  | Not-determined | Genome-fragment | NA | 0     |
| S2-final-viral-combined_k141_134900  | [full]   | 1383  | No  | NA  | 0 | 1  | Low-quality    | Genome-fragment | NA | 1.04  |
| S2-final-viral-combined_k141_231191  | [full]   | 1383  | No  | NA  | 0 | 0  | Low-quality    | Genome-fragment | NA | 3.54  |
| S1-final-viral-combined_k141_374410  | [full]   | 1754  | No  | NA  | 0 | 2  | Not-determined | Genome-fragment | NA | 0     |
| S1-final-viral-combined_k141_110023  | [full]   | 3147  | No  | NA  | 0 | 1  | Not-determined | Genome-fragment | NA | 0     |
| S2_k141_88626                        |          | 1383  | No  | NA  | 0 | 1  | Low-quality    | Genome-fragment | NA | 0.82  |
| S8_k141_201051                       |          | 1383  | No  | NA  | 1 | 0  | Low-quality    | Genome-fragment | NA | 0.88  |
| S1-final-viral-combined_k141_159746  | [full]   | 1733  | No  | NA  | 0 | 1  | Not-determined | Genome-fragment | NA | 0     |
| S1-final-viral-combined_k141_45089   | [full]   | 2254  | No  | NA  | 0 | 0  | Not-determined | Genome-fragment | NA | 0     |
| S11-final-viral-combined_k141_165066 | [full]   | 1284  | No  | NA  | 0 | 2  | Low-quality    | Genome-fragment | NA | 0.83  |
| S1-final-viral-combined_k141_374442  | [full]   | 1794  | No  | NA  | 0 | 2  | Not-determined | Genome-fragment | NA | 0     |
| S1-final-viral-combined_k141_110042  | [full]   | 3863  | No  | NA  | 0 | 2  | Not-determined | Genome-fragment | NA | 0     |
| S7-final-viral-combined_k141_180805  | [full]   | 1284  | No  | NA  | 0 | 0  | Low-quality    | Genome-fragment | NA | 1.64  |
| S1-final-viral-combined_k141_44880   | [full]   | 4909  | No  | NA  | 0 | 0  | Not-determined | Genome-fragment | NA | 0     |
| S17_k141_76197                       |          | 1384  | No  | NA  | 1 | 0  | Low-quality    | Genome-fragment | NA | 1.26  |
| S1-final-viral-combined_k141_340540  | [full]   | 14314 | No  | NA  | 0 | 11 | Not-determined | Genome-fragment | NA | 0     |
| S1-final-viral-combined_k141_275374  | [full]   | 7885  | No  | NA  | 0 | 7  | Not-determined | Genome-fragment | NA | 0     |
| S1-final-viral-combined_k141_326225  | [full]   | 2199  | No  | NA  | 0 | 2  | Not-determined | Genome-fragment | NA | 0     |
| S1-final-viral-combined_k141_243141  | [full]   | 8426  | No  | NA  | 0 | 3  | Not-determined | Genome-fragment | NA | 0     |
| S1-final-viral-combined_k141_77320   | [full]   | 4371  | No  | NA  | 0 | 1  | Not-determined | Genome-fragment | NA | 0     |
| S1-final-viral-combined_k141_326250  | [full]   | 1072  | No  | NA  | 0 | 1  | Not-determined | Genome-fragment | NA | 0     |
| S1-final-viral-combined_k141_340558  | [full]   | 27649 | No  | NA  | 8 | 0  | Medium-quality | Genome-fragment | NA | 52.94 |
| S1-final-viral-combined_k141_194124  | [full]   | 14062 | No  | NA  | 3 | 1  | Not-determined | Genome-fragment | NA | 0     |
| S1-final-viral-combined_k141_77327   | [full]   | 2946  | No  | NA  | 0 | 1  | Not-determined | Genome-fragment | NA | 0     |
| S1-final-viral-combined_k141_28676   | [full]   | 4247  | No  | NA  | 0 | 3  | Not-determined | Genome-fragment | NA | 0     |
| S1-final-viral-combined_k141_58934   | [full]   | 1964  | No  | NA  | 0 | 0  | Not-determined | Genome-fragment | NA | 0     |
| S1-final-viral-combined_k141_275444  | [full]   | 1161  | No  | NA  | 0 | 0  | Not-determined | Genome-fragment | NA | 0     |
| S1-final-viral-combined_k141_77329   | [full]   | 7173  | No  | NA  | 0 | 0  | Not-determined | Genome-fragment | NA | 0     |
| S1-final-viral-combined_k141_292811  | [full]   | 3284  | No  | NA  | 0 | 3  | Not-determined | Genome-fragment | NA | 0     |
| S8-final-viral-combined_k141_764212  | [full]   | 1384  | No  | NA  | 0 | 0  | Low-quality    | Genome-fragment | NA | 3.28  |
| S1-final-viral-combined_k141_340600  | [full]   | 4058  | No  | NA  | 0 | 5  | Not-determined | Genome-fragment | NA | 0     |
| S9_k141_76135                        |          | 1385  | No  | NA  | 0 | 2  | Low-quality    | Genome-fragment | NA | 2.17  |
| S1-final-viral-combined_k141_332161  | [full]   | 1385  | No  | NA  | 1 | 0  | Low-quality    | Genome-fragment | NA | 1.02  |
| S1-final-viral-combined_k141_222761  | [full]   | 1385  | No  | NA  | 0 | 0  | Low-quality    | Genome-fragment | NA | 2.65  |
| S1-final-viral-combined_k141_77380   | [full]   | 3789  | No  | NA  | 0 | 2  | Not-determined | Genome-fragment | NA | 0     |
| S9_k141_192284                       |          | 1385  | No  | NA  | 0 | 1  | Low-quality    | Genome-fragment | NA | 0.59  |
| S1-final-viral-combined_k141_340616  | [full]   | 1618  | No  | NA  | 0 | 0  | Not-determined | Genome-fragment | NA | 0     |
| S1-final-viral-combined_k141_77389   | [full]   | 1645  | No  | NA  | 0 | 0  | Not-determined | Genome-fragment | NA | 0     |
| S17-final-viral-combined_k141_135615 | [full]   | 1385  | No  | NA  | 1 | 0  | Low-quality    | Genome-fragment | NA | 3.2   |
| S12_k141_385376                      |          | 1385  | No  | NA  | 0 | 0  | Low-quality    | Genome-fragment | NA | 2.75  |
| S1-final-viral-combined_k141_12688   | [full]   | 2585  | No  | NA  | 0 | 3  | Not-determined | Genome-fragment | NA | 0     |
| S1-final-viral-combined_k141_340631  | [full]   | 2990  | No  | NA  | 0 | 1  | Not-determined | Genome-fragment | NA | 0     |
| S12_k141_213592                      |          | 1385  | No  | NA  | 0 | 0  | Low-quality    | Genome-fragment | NA | 2.35  |
| S1-final-viral-combined_k141_194239  | [full]   | 3406  | No  | NA  | 0 | 0  | Not-determined | Genome-fragment | NA | 0     |
| S2-final-viral-combined_k141_211250  | [full]   | 1385  | No  | NA  | 1 | 0  | Low-quality    | Genome-fragment | NA | 2.9   |
| S2-final-viral-combined_k141_246421  | [full]   | 1385  | No  | NA  | 0 | 2  | Low-quality    | Genome-fragment | NA | 0.44  |
| S2_k141_114514                       |          | 1385  | No  | NA  | 0 | 0  | Low-quality    | Genome-fragment | NA | 2.71  |
| S4-final-viral-combined_k141_42788   | [full]   | 1385  | No  | NA  | 0 | 0  | Low-quality    | Genome-fragment | NA | 2.61  |
| S4-final-viral-combined_k141_94099   | [full]   | 1000  | No  | NA  | 1 | 0  | Low-quality    | Genome-fragment | NA | 0     |
| S1-final-viral-combined_k141_374431  | [full]   | 1000  | No  | NA  | 0 | 0  | Not-determined | Genome-fragment | NA | 0     |
| S1-final-viral-combined_k141_340654  | [full]   | 3865  | No  | NA  | 0 | 3  | Not-determined | Genome-fragment | NA | 0     |
| S1-final-viral-combined_k141_374624  | [full]   | 1262  | No  | NA  | 0 | 0  | Not-determined | Genome-fragment | NA | 2.02  |
| S4-final-viral-combined_k141_161801  | [H2gene] | 1385  | No  | NA  | 0 | 0  | Low-quality    | Genome-fragment | NA | 0.56  |
| S8-final-viral-combined_k141_257513  | [full]   | 1385  | No  | NA  | 0 | 0  | Low-quality    | Genome-fragment | NA | 3.61  |
| S8-final-viral-combined_k141_11209   | [full]   | 1385  | No  | NA  | 1 | 0  | Low-quality    | Genome-fragment | NA | 0     |
| S1-final-viral-combined_k141_61974   | [full]   | 4390  | No  | NA  | 0 | 3  | Not-determined | Genome-fragment | NA | 0     |
| S1-final-viral-combined_k141_77544   | [full]   | 1008  | No  | NA  | 0 | 0  | Not-determined | Genome-fragment | NA | 0     |
| S1-final-viral-combined_k141_28797   | [full]   | 2571  | No  | NA  | 0 | 0  | Not-determined | Genome-fragment | NA | 0     |
| S1-final-viral-combined_k141_326027  | [full]   | 1386  | No  | NA  | 1 | 0  | Low-quality    | Genome-fragment | NA | 3.69  |
| S1-final-viral-combined_k141_775010  | [full]   | 2911  | No  | NA  | 0 | 2  | Not-determined | Genome-fragment | NA | 0     |
| S1-final-viral-combined_k141_292934  | [full]   | 2316  | No  | NA  | 0 | 2  | Not-determined | Genome-fragment | NA | 0     |
| S1-final-viral-combined_k141_243143  | [full]   | 2084  | No  | NA  | 0 | 0  | Not-determined | Genome-fragment | NA | 0     |
| S1-final-viral-combined_k141_28829   | [full]   | 2117  | No  | NA  | 0 | 0  | Not-determined | Genome-fragment | NA | 0     |
| S1-final-viral-combined_k141_41148   | [full]   | 1386  | No  | NA  | 0 | 1  | Low-quality    | Genome-fragment | NA | 4.14  |
| S1-final-viral-combined_k141_77591   | [full]   | 1496  | No  | NA  | 0 | 1  | Not-determined | Genome-fragment | NA | 1.31  |
| S1_k141_189145                       |          | 1386  | No  | NA  | 0 | 0  | Low-quality    | Genome-fragment | NA | 2.69  |
| S1-final-viral-combined_k141_77598   | [full]   | 1349  | No  | NA  | 0 | 3  | Low-quality    | Genome-fragment | NA | 1.4   |
| S5_k141_96058                        |          | 1386  | No  | NA  | 0 | 0  | Low-quality    | Genome-fragment | NA | 2.9   |
| S7-final-viral-combined_k141_9513    | [full]   | 4485  | No  | NA  | 0 | 4  | Not-determined | Genome-fragment | NA | 0     |
| S1-final-viral-combined_k141_292971  | [full]   | 1386  | No  | NA  | 0 | 0  | Low-quality    | Genome-fragment | NA | 1.08  |
| S12-final-viral-combined_k141_32216  | [full]   | 1386  | No  | NA  | 0 | 2  | Low-quality    | Genome-fragment | NA | 0.71  |
| S12_k141_214225                      |          | 1386  | No  | NA  | 2 | 0  | Low-quality    | Genome-fragment | NA | 0.66  |
| S8-final-viral-combined_k141_157549  | [full]   | 1386  | Yes | 339 | 1 | 2  | Low-quality    | Genome-fragment | NA | 0.68  |
| S8_k141_68222                        |          | 1386  | No  | NA  | 1 | 0  | Low-quality    | Genome-fragment | NA | 1.58  |
| S8-final-viral-combined_k141_127871  | [full]   | 1387  | No  | NA  | 2 | 0  | Low-quality    | Genome-fragment | NA | 2.15  |
| S1-final-viral-combined_k141_391029  | [full]   | 1199  | No  | NA  | 0 | 2  | Not-determined | Genome-fragment | NA | 0     |
| S1-final-viral-combined_k141_293030  | [full]   | 1006  | No  | NA  | 0 | 1  | Not-determined | Genome-fragment | NA | 0     |
| S11-final-viral-combined_k141_324873 | [full]   | 1387  | No  | NA  | 0 | 1  | Low-quality    | Genome-fragment | NA | 0.15  |
| S5-final-viral-combined_k141_156031  | [H2gene] | 1387  | No  | NA  | 0 | 0  | Low-quality    | Genome-fragment | NA | 3.16  |
| S1-final-viral-combined_k141_293050  | [full]   | 2844  | No  | NA  | 0 | 3  | Not-determined | Genome-fragment | NA | 0     |
| S1-final-viral-combined_k141_95099   | [full]   | 2114  | No  | NA  | 0 | 2  | Not-determined | Genome-fragment | NA | 0     |
| S1-final-viral-combined_k141_194461  | [full]   | 5888  | No  | NA  | 0 | 2  | Not-determined | Genome-fragment | NA | 0     |
| S1-final-viral-combined_k141_243443  | [full]   | 1814  | No  | NA  | 0 | 0  | Not-determined | Genome-fragment | NA | 0     |
| S1-final-viral-combined_k141_159970  | [full]   | 1530  | No  | NA  | 0 | 2  | Not-determined | Genome-fragment | NA | 0     |
| S1-final-viral-combined_k141_128847  | [full]   | 2024  | No  | NA  | 0 | 4  | Not-determined | Genome-fragment | NA | 0     |
| S17-final-viral-combined_k141_199451 | [full]   | 1387  | No  | NA  | 1 | 0  | Low-quality    | Genome-fragment | NA | 3.06  |
| S1-final-viral-combined_k141_62134   | [full]   | 1775  | No  | NA  | 0 | 1  | Not-determined | Genome-fragment | NA | 0     |
| S1-final-viral-combined_k141_95140   | [full]   | 2151  | No  | NA  | 0 | 1  | Not-determined | Genome-fragment | NA | 0     |
| S1-final-viral-combined_k141_211021  | [full]   | 1340  | No  |     |   |    |                |                 |    |       |



|                                      |          |       |    |    |   |   |                |                 |    |       |   |
|--------------------------------------|----------|-------|----|----|---|---|----------------|-----------------|----|-------|---|
| S1-final-viral-combined_k141_211260  | [full]   | 1853  | No | NA | 0 | 2 | Not-determined | Genome-fragment | NA | 0     | 0 |
| S1-final-viral-combined_k141_211270  | [full]   | 1163  | No | NA | 0 | 2 | Not-determined | Genome-fragment | NA | 0     | 0 |
| S1-final-viral-combined_k141_12952   | [full]   | 5661  | No | NA | 0 | 4 | Not-determined | Genome-fragment | NA | 0     | 0 |
| S1-final-viral-combined_k141_326687  | [full]   | 4194  | No | NA | 0 | 0 | Not-determined | Genome-fragment | NA | 0     | 0 |
| S12-final-viral-combined_k141_241872 | [full]   | 1388  | No | NA | 0 | 0 | Low-quality    | Genome-fragment | NA | 1.05  | 0 |
| S1-final-viral-combined_k141_12958   | [full]   | 1640  | No | NA | 0 | 2 | Not-determined | Genome-fragment | NA | 0     | 0 |
| S12-final-viral-combined_k141_165702 | [full]   | 1388  | No | NA | 0 | 1 | Low-quality    | Genome-fragment | NA | 1.33  | 0 |
| S1-final-viral-combined_k141_45410   | [full]   | 3754  | No | NA | 0 | 5 | Not-determined | Genome-fragment | NA | 4.51  | 0 |
| S12-final-viral-combined_k141_21942  | [H2gene] | 1388  | No | NA | 0 | 0 | Low-quality    | Genome-fragment | NA | 4.01  | 0 |
| S6-final-viral-combined_k141_12825   | [full]   | 1388  | No | NA | 1 | 0 | Low-quality    | Genome-fragment | NA | 0.74  | 0 |
| S1-final-viral-combined_k141_176160  | [full]   | 5334  | No | NA | 0 | 3 | Not-determined | Genome-fragment | NA | 0     | 0 |
| S6_k141_13691                        |          | 1388  | No | NA | 0 | 1 | Not-determined | Genome-fragment | NA | 0     | 0 |
| S1-final-viral-combined_k141_309869  | [full]   | 3454  | No | NA | 0 | 1 | Not-determined | Genome-fragment | NA | 0     | 0 |
| S1-final-viral-combined_k141_359429  | [full]   | 2840  | No | NA | 0 | 2 | Not-determined | Genome-fragment | NA | 0     | 0 |
| S1-final-viral-combined_k141_11545   | [full]   | 1389  | No | NA | 0 | 0 | Low-quality    | Genome-fragment | NA | 2.93  | 0 |
| S17-final-viral-combined_k141_6027   | [full]   | 1389  | No | NA | 0 | 1 | Low-quality    | Genome-fragment | NA | 1.13  | 0 |
| S12-final-viral-combined_k141_103812 | [full]   | 1389  | No | NA | 1 | 0 | Low-quality    | Genome-fragment | NA | 3.02  | 0 |
| S2-final-viral-combined_k141_145329  | [full]   | 1389  | No | NA | 0 | 0 | Low-quality    | Genome-fragment | NA | 2.82  | 0 |
| S1-final-viral-combined_k141_17383   | [full]   | 1455  | No | NA | 0 | 0 | Not-determined | Genome-fragment | NA | 3.89  | 0 |
| S1-final-viral-combined_k141_293333  | [full]   | 1512  | No | NA | 0 | 1 | Not-determined | Genome-fragment | NA | 0     | 0 |
| S4-final-viral-combined_k141_154077  | [full]   | 1389  | No | NA | 0 | 1 | Low-quality    | Genome-fragment | NA | 6.61  | 0 |
| S4_k141_102024                       |          | 1389  | No | NA | 1 | 0 | Low-quality    | Genome-fragment | NA | 3.48  | 0 |
| S6_k141_135679                       |          | 1389  | No | NA | 2 | 0 | Low-quality    | Genome-fragment | NA | 2.16  | 0 |
| S1-final-viral-combined_k141_45489   | [full]   | 5207  | No | NA | 0 | 2 | Not-determined | Genome-fragment | NA | 0     | 0 |
| S1-final-viral-combined_k141_26800   | [full]   | 2165  | No | NA | 0 | 2 | Not-determined | Genome-fragment | NA | 0     | 0 |
| S1-final-viral-combined_k141_144713  | [full]   | 1031  | No | NA | 0 | 1 | Not-determined | Genome-fragment | NA | 0     | 0 |
| S1-final-viral-combined_k141_211406  | [full]   | 6409  | No | NA | 0 | 1 | Not-determined | Genome-fragment | NA | 0.98  | 0 |
| S8_k141_142840                       |          | 1389  | No | NA | 0 | 0 | Low-quality    | Genome-fragment | NA | 0     | 0 |
| S1-final-viral-combined_k141_309943  | [full]   | 11578 | No | NA | 0 | 0 | Not-determined | Genome-fragment | NA | 0     | 0 |
| S8_k141_271865                       |          | 1389  | No | NA | 0 | 0 | Low-quality    | Genome-fragment | NA | 1.68  | 0 |
| S11-final-viral-combined_k141_113656 | [full]   | 1390  | No | NA | 0 | 0 | Low-quality    | Genome-fragment | NA | 3.2   | 0 |
| S1-final-viral-combined_k141_360489  | [full]   | 1390  | No | NA | 0 | 0 | Low-quality    | Genome-fragment | NA | 1.91  | 0 |
| S3-final-viral-combined_k141_19147   | [full]   | 1390  | No | NA | 0 | 2 | Low-quality    | Genome-fragment | NA | 0.5   | 0 |
| S17-final-viral-combined_k141_254900 | [full]   | 1390  | No | NA | 0 | 2 | Low-quality    | Genome-fragment | NA | 0.87  | 0 |
| S12-final-viral-combined_k141_318859 | [full]   | 1390  | No | NA | 0 | 0 | Low-quality    | Genome-fragment | NA | 4.22  | 0 |
| S2-final-viral-combined_k141_8038    | [full]   | 1390  | No | NA | 0 | 1 | Low-quality    | Genome-fragment | NA | 3.89  | 0 |
| S9-final-viral-combined_k141_12352   | [full]   | 1391  | No | NA | 1 | 0 | Low-quality    | Genome-fragment | NA | 0.96  | 0 |
| S1-final-viral-combined_k141_227203  | [full]   | 4267  | No | NA | 0 | 1 | Not-determined | Genome-fragment | NA | 0     | 0 |
| S1-final-viral-combined_k141_275961  | [full]   | 2403  | No | NA | 0 | 2 | Not-determined | Genome-fragment | NA | 0     | 0 |
| S11-final-viral-combined_k141_227206 | [full]   | 1566  | No | NA | 0 | 0 | Not-determined | Genome-fragment | NA | 0     | 0 |
| S11-final-viral-combined_k141_29300  | [full]   | 1391  | No | NA | 1 | 0 | Low-quality    | Genome-fragment | NA | 3.05  | 0 |
| S1-final-viral-combined_k141_275978  | [full]   | 1039  | No | NA | 1 | 1 | Not-determined | Genome-fragment | NA | 0     | 0 |
| S1-final-viral-combined_k141_194848  | [full]   | 3888  | No | NA | 0 | 3 | Not-determined | Genome-fragment | NA | 0     | 0 |
| S1-final-viral-combined_k141_173515  | [full]   | 1391  | No | NA | 2 | 0 | Low-quality    | Genome-fragment | NA | 3.33  | 0 |
| S3-final-viral-combined_k141_17845   | [full]   | 1391  | No | NA | 0 | 0 | Low-quality    | Genome-fragment | NA | 9.49  | 0 |
| S1-final-viral-combined_k141_35486   | [full]   | 2102  | No | NA | 0 | 2 | Not-determined | Genome-fragment | NA | 0     | 0 |
| S1-final-viral-combined_k141_176320  | [full]   | 3528  | No | NA | 0 | 2 | Not-determined | Genome-fragment | NA | 0     | 0 |
| S1-final-viral-combined_k141_243939  | [full]   | 7021  | No | NA | 0 | 0 | Not-determined | Genome-fragment | NA | 0     | 0 |
| S1-final-viral-combined_k141_144721  | [full]   | 3714  | No | NA | 0 | 1 | Not-determined | Genome-fragment | NA | 0     | 0 |
| S1-final-viral-combined_k141_124772  | [full]   | 1697  | No | NA | 0 | 1 | Not-determined | Genome-fragment | NA | 0     | 0 |
| S1-final-viral-combined_k141_27993   | [full]   | 1768  | No | NA | 0 | 1 | Not-determined | Genome-fragment | NA | 0     | 0 |
| S1-final-viral-combined_k141_194078  | [full]   | 1682  | No | NA | 0 | 0 | Not-determined | Genome-fragment | NA | 0     | 0 |
| S1-final-viral-combined_k141_194880  | [full]   | 1197  | No | NA | 0 | 2 | Not-determined | Genome-fragment | NA | 0     | 0 |
| S1-final-viral-combined_k141_77995   | [full]   | 1663  | No | NA | 0 | 1 | Not-determined | Genome-fragment | NA | 0     | 0 |
| S1-final-viral-combined_k141_176340  | [full]   | 1658  | No | NA | 0 | 0 | Not-determined | Genome-fragment | NA | 0     | 0 |
| S1-final-viral-combined_k141_178336  | [full]   | 1391  | No | NA | 0 | 0 | Low-quality    | Genome-fragment | NA | 0.69  | 0 |
| S5-final-viral-combined_k141_18560   | [full]   | 1391  | No | NA | 0 | 0 | Low-quality    | Genome-fragment | NA | 0.84  | 0 |
| S1-final-viral-combined_k141_215306  | [full]   | 7339  | No | NA | 0 | 1 | Not-determined | Genome-fragment | NA | 0     | 0 |
| S1-final-viral-combined_k141_310041  | [full]   | 3514  | No | NA | 0 | 0 | Not-determined | Genome-fragment | NA | 0     | 0 |
| S1-final-viral-combined_k141_227265  | [full]   | 2707  | No | NA | 0 | 2 | Not-determined | Genome-fragment | NA | 0     | 0 |
| S2-final-viral-combined_k141_233342  | [full]   | 1391  | No | NA | 1 | 0 | Low-quality    | Genome-fragment | NA | 20.82 | 0 |
| S1-final-viral-combined_k141_129356  | [full]   | 4388  | No | NA | 0 | 0 | Not-determined | Genome-fragment | NA | 0     | 0 |
| S1-final-viral-combined_k141_341227  | [full]   | 1670  | No | NA | 0 | 2 | Not-determined | Genome-fragment | NA | 0     | 0 |
| S1-final-viral-combined_k141_45594   | [full]   | 2018  | No | NA | 0 | 0 | Not-determined | Genome-fragment | NA | 0     | 0 |
| S6-final-viral-combined_k141_1322174 | [full]   | 1391  | No | NA | 0 | 0 | Low-quality    | Genome-fragment | NA | 2.78  | 0 |
| S8-final-viral-combined_k141_236277  | [full]   | 1391  | No | NA | 1 | 0 | Low-quality    | Genome-fragment | NA | 3.18  | 0 |
| S8-final-viral-combined_k141_86842   | [full]   | 1391  | No | NA | 0 | 1 | Low-quality    | Genome-fragment | NA | 2.39  | 0 |
| S1-final-viral-combined_k141_215336  | [full]   | 1260  | No | NA | 0 | 1 | Not-determined | Genome-fragment | NA | 0     | 0 |
| S9-final-viral-combined_k141_46556   | [full]   | 1392  | No | NA | 0 | 0 | Low-quality    | Genome-fragment | NA | 3.35  | 0 |
| S11-final-viral-combined_k141_187869 | [full]   | 1392  | No | NA | 0 | 0 | Low-quality    | Genome-fragment | NA | 3.49  | 0 |
| S1-final-viral-combined_k141_129384  | [full]   | 1395  | No | NA | 0 | 1 | Not-determined | Genome-fragment | NA | 1.91  | 0 |
| S1-final-viral-combined_k141_164145  | [full]   | 1392  | No | NA | 0 | 0 | Low-quality    | Genome-fragment | NA | 0     | 0 |
| S1-final-viral-combined_k141_326953  | [full]   | 4893  | No | NA | 0 | 3 | Not-determined | Genome-fragment | NA | 0     | 0 |
| S1-final-viral-combined_k141_13200   | [full]   | 2387  | No | NA | 0 | 2 | Not-determined | Genome-fragment | NA | 0     | 0 |
| S1-final-viral-combined_k141_261287  | [full]   | 6326  | No | NA | 0 | 3 | Not-determined | Genome-fragment | NA | 0     | 0 |
| S1-final-viral-combined_k141_13210   | [full]   | 2614  | No | NA | 0 | 1 | Not-determined | Genome-fragment | NA | 0     | 0 |
| S1-final-viral-combined_k141_326978  | [full]   | 1762  | No | NA | 0 | 1 | Not-determined | Genome-fragment | NA | 0     | 0 |
| S1-final-viral-combined_k141_375225  | [full]   | 2161  | No | NA | 0 | 3 | Not-determined | Genome-fragment | NA | 0     | 0 |
| S1-final-viral-combined_k141_35553   | [full]   | 2461  | No | NA | 0 | 0 | Not-determined | Genome-fragment | NA | 0     | 0 |
| S1-final-viral-combined_k141_45647   | [full]   | 2024  | No | NA | 0 | 1 | Not-determined | Genome-fragment | NA | 0     | 0 |
| S1-final-viral-combined_k141_375241  | [full]   | 2027  | No | NA | 0 | 2 | Not-determined | Genome-fragment | NA | 0     | 0 |
| S1-final-viral-combined_k141_78024   | [full]   | 1440  | No | NA | 0 | 0 | Not-determined | Genome-fragment | NA | 0     | 0 |
| S3-final-viral-combined_k141_112493  | [full]   | 1392  | No | NA | 0 | 0 | Low-quality    | Genome-fragment | NA | 2.86  | 0 |
| S1-final-viral-combined_k141_13242   | [full]   | 3388  | No | NA | 0 | 1 | Not-determined | Genome-fragment | NA | 0     | 0 |
| S1-final-viral-combined_k141_210152  | [full]   | 1567  | No | NA | 0 | 0 | Not-determined | Genome-fragment | NA | 0     | 0 |
| S1-final-viral-combined_k141_35582   | [full]   | 1138  | No | NA | 0 | 0 | Not-determined | Genome-fragment | NA | 0     | 0 |
| S1-final-viral-combined_k141_144933  | [full]   | 2901  | No | NA | 0 | 4 | Not-determined | Genome-fragment | NA | 0     | 0 |
| S7-final-viral-combined_k141_215324  | [full]   | 1392  | No | NA | 0 | 0 | Low-quality    | Genome-fragment | NA | 2.73  | 0 |
| S1-final-viral-combined_k141_156010  | [full]   | 3349  | No | NA | 0 | 2 | Not-determined | Genome-fragment | NA | 0     | 0 |
| S1-final-viral-combined_k141_176469  | [full]   | 7374  | No | NA | 0 | 5 | Not-determined | Genome-fragment | NA | 0     | 0 |
| S1-final-viral-combined_k141_217126  | [full]   | 1197  | No | NA | 0 | 2 | Not-determined | Genome-fragment | NA | 0     | 0 |
| S1-final-viral-combined_k141_29201   | [H2gene] | 3024  | No | NA | 0 | 0 | Not-determined | Genome-fragment | NA | 0     | 0 |
| S7-final-viral-combined_k141_113437  | [H2gene] | 1392  | No | NA | 1 | 0 | Low-quality    | Genome-fragment | NA | 0.96  | 0 |
| S1-final-viral-combined_k141_217138  | [full]   | 1098  | No | NA | 0 | 1 | Not-determined | Genome-fragment | NA | 0     | 0 |
| S17-final-viral-combined_k141_57688  | [full]   | 1392  | No | NA | 0 | 0 | Low-quality    | Genome-fragment | NA | 2.52  | 0 |
| S17-final-viral-combined_k141_120268 | [full]   | 1392  | No | NA | 0 | 0 | Low-quality    | Genome-fragment | NA | 2.65  | 0 |
| S17-final-viral-combined_k141_152774 | [full]   | 1392  | No | NA | 0 | 1 | Low-quality    | Genome-fragment | NA | 0.94  | 0 |
| S12_k141_35626                       |          | 1392  | No | NA | 0 | 1 | Low-quality    | Genome-fragment | NA | 0.68  | 0 |
| S1-final-viral-combined_k141_176250  | [full]   | 3538  | No | NA | 0 | 0 | Not-determined | Genome-fragment | NA | 0     | 0 |
| S1-final-viral-combined_k141_160638  | [full]   | 4579  | No | NA | 0 | 1 | Not-determined | Genome-fragment | NA | 0     | 0 |
| S1-final-viral-combined_k141_145002  | [full]   | 3910  | No | NA | 0 | 0 | Not-determined | Genome-fragment | NA | 0     | 0 |
| S2_k141_25223                        |          | 1392  | No | NA | 1 | 0 | Low-quality    | Genome-fragment | NA | 3.05  | 0 |
| S1-final-viral-combined_k141_359668  | [full]   | 1125  | No | NA | 0 | 1 | Not-determined | Genome-fragment | NA | 0     | 0 |
| S4-final-viral-combined_k141_124979  | [full]   | 1392  | No | NA | 1 | 0 | Low-quality    | Genome-fragment | NA | 2.75  | 0 |
| S4-final-viral-combined_k141_625557  | [full]   | 1392  | No | NA | 0 | 0 | Low-quality    | Genome-fragment | NA | 3.75  | 0 |
| S1-final-viral-combined_k141_375331  | [full]   | 2857  | No | NA | 0 | 0 | Not-determined | Genome-fragment | NA | 0     | 0 |
| S9-final-viral-combined_k141_10887   | [full]   | 1393  | No | NA | 1 | 0 | Low-quality    | Genome-fragment | NA | 1.72  | 0 |
| S9-final-viral-combined_k141_10895   | [full]   | 1393  | No | NA | 0 | 3 | Low-quality    | Genome-fragment | NA | 0.25  | 0 |
| S11-final-viral-combined_k141_210701 | [full]   | 1393  | No | NA | 0 | 0 | Low-quality    | Genome-fragment | NA | 3.65  | 0 |
| S1-final-viral-combined_k141_244188  | [full]   | 2690  | No | NA | 0 | 2 | Not-determined | Genome-fragment | NA | 0     | 0 |
| S1-final-viral-combined_k141_341429  | [full]   | 1603  | No | NA | 0 | 1 | Not-determined | Genome-fragment | NA | 2.42  | 0 |
| S1-final-viral-combined_k141_391471  | [full]   | 1393  | No | NA | 0 | 1 | Low-quality    | Genome-fragment | NA | 3.31  | 0 |
| S1-final-viral-combined_k141_238969  | [H2gene] | 1393  | No | NA | 1 | 0 | Low-quality    | Genome-fragment | NA | 2.26  | 0 |
| S5-final-viral-combined_k141_64358   | [full]   | 1393  | No | NA | 3 | 0 | Low-quality    | Genome-fragment | NA | 0     | 0 |
| S1-final-viral-combined_k141_176551  | [full]   | 1402  | No | NA | 0 | 0 | Not-determined | Genome-fragment | NA | 0     | 0 |
| S1-final-viral-combined_k141_160702  | [full]   | 1434  | No | NA | 0 | 2 | Not-determined | Genome-fragment | NA | 0     | 0 |
| S1-final-viral-combined_k141_227480  | [full]   | 1630  | No | NA | 0 | 2 | Not-determined | Genome-fragment | NA | 0     | 0 |
| S7-final-viral-combined_k141_180937  | [full]   | 1393  | No | NA | 0 | 0 | Low-quality    | Genome-fragment | NA | 3.06  | 0 |
| S7-final-viral-combined_k141_247519  | [H2gene] | 1393  | No | NA | 1 | 0 | Low-quality    | Genome-fragment | NA | 3.62  | 0 |
| S1-final-viral-combined_k141_244241  | [full]   | 6631  | No | NA | 0 | 5 | Not-determined | Genome-fragment | NA | 1.94  | 0 |
| S12-final-viral-combined_k141_26460  | [full]   | 1393  | No | NA | 1 | 0 | Low-quality    | Genome-fragment | NA | 0     | 0 |
| S1-final-viral-combined_k141_45768   | [full]   | 2400  | No | NA | 0 | 1 | Not-determined | Genome-fragment | NA | 0     | 0 |



|                                      |           |       |     |     |    |    |                |                 |    |       |      |
|--------------------------------------|-----------|-------|-----|-----|----|----|----------------|-----------------|----|-------|------|
| S1-final-viral-combined_k141_783571  | [full]    | 2025  | No  | NA  | 0  | 1  | Not-determined | Genome-fragment | NA | 0     | 0    |
| S1-final-viral-combined_k141_110908  | [full]    | 1558  | No  | NA  | 0  | 0  | Not-determined | Genome-fragment | NA | 0     | 0    |
| S1-final-viral-combined_k141_78362   | [full]    | 3283  | No  | NA  | 0  | 0  | Not-determined | Genome-fragment | NA | 0     | 0    |
| S1-final-viral-combined_k141_96007   | [full]    | 1398  | No  | NA  | 0  | 0  | Not-determined | Genome-fragment | NA | 0     | 0    |
| S1-final-viral-combined_k141_244507  | [full]    | 5859  | No  | NA  | 0  | 4  | Not-determined | Genome-fragment | NA | 0     | 0    |
| S17-final-viral-combined_k141_73151  | [full]    | 1395  | No  | NA  | 0  | 0  | Low-quality    | Genome-fragment | NA | 2.21  | 0    |
| S1-final-viral-combined_k141_310323  | [full]    | 1010  | No  | NA  | 0  | 1  | Not-determined | Genome-fragment | NA | 0     | 0    |
| S1-final-viral-combined_k141_13643   | [full]    | 1999  | No  | NA  | 0  | 2  | Not-determined | Genome-fragment | NA | 0     | 0    |
| S1-final-viral-combined_k141_212110  | [full]    | 3464  | No  | NA  | 0  | 3  | Not-determined | Genome-fragment | NA | 0     | 0    |
| S1-final-viral-combined_k141_160964  | [full]    | 16754 | No  | NA  | 0  | 9  | Not-determined | Genome-fragment | NA | 0     | 0    |
| S12-final-viral-combined_k141_148867 | [full]    | 1395  | Yes | 996 | 1  | 1  | Low-quality    | Genome-fragment | NA | 1.78  | 28.6 |
| S1-final-viral-combined_k141_259991  | [full]    | 2255  | No  | NA  | 0  | 2  | Not-determined | Genome-fragment | NA | 0     | 0    |
| S1-final-viral-combined_k141_78379   | [full]    | 3396  | No  | NA  | 0  | 0  | Not-determined | Genome-fragment | NA | 0     | 0    |
| S1-final-viral-combined_k141_78382   | [full]    | 1435  | No  | NA  | 0  | 2  | Not-determined | Genome-fragment | NA | 0     | 0    |
| S1-final-viral-combined_k141_129871  | [full]    | 1876  | No  | NA  | 0  | 0  | Not-determined | Genome-fragment | NA | 0     | 0    |
| S2-final-viral-combined_k141_113474  | [full]    | 1395  | No  | NA  | 0  | 1  | Low-quality    | Genome-fragment | NA | 0.72  | 0    |
| S1-final-viral-combined_k141_46048   | [full]    | 1880  | No  | NA  | 0  | 2  | Not-determined | Genome-fragment | NA | 0     | 0    |
| S4-final-viral-combined_k141_30438   | [1/2gene] | 1395  | No  | NA  | 2  | 0  | Low-quality    | Genome-fragment | NA | 2.09  | 0    |
| S1-final-viral-combined_k141_46059   | [full]    | 2879  | No  | NA  | 0  | 2  | Not-determined | Genome-fragment | NA | 0     | 0    |
| S1-final-viral-combined_k141_227745  | [full]    | 3662  | No  | NA  | 0  | 2  | Not-determined | Genome-fragment | NA | 0     | 0    |
| S8-final-viral-combined_k141_207258  | [full]    | 1395  | No  | NA  | 0  | 2  | Low-quality    | Genome-fragment | NA | 0.75  | 0    |
| S1-final-viral-combined_k141_261620  | [full]    | 2151  | No  | NA  | 0  | 2  | Not-determined | Genome-fragment | NA | 0     | 0    |
| S11-final-viral-combined_k141_124189 | [full]    | 1396  | No  | NA  | 0  | 1  | Low-quality    | Genome-fragment | NA | 0.79  | 0    |
| S1-final-viral-combined_k141_195464  | [full]    | 7560  | No  | NA  | 0  | 6  | Not-determined | Genome-fragment | NA | 0     | 0    |
| S1-final-viral-combined_k141_110983  | [full]    | 20869 | No  | NA  | 0  | 15 | Not-determined | Genome-fragment | NA | 0     | 0    |
| S1-final-viral-combined_k141_227795  | [full]    | 5097  | No  | NA  | 0  | 2  | Not-determined | Genome-fragment | NA | 0     | 0    |
| S11-final-viral-combined_k141_96640  | [full]    | 1396  | No  | NA  | 0  | 0  | Low-quality    | Genome-fragment | NA | 3.29  | 0    |
| S11-final-viral-combined_k141_38764  | [full]    | 1396  | No  | NA  | 1  | 0  | Low-quality    | Genome-fragment | NA | 2.97  | 0    |
| S1-final-viral-combined_k141_244629  | [full]    | 1202  | No  | NA  | 0  | 0  | Not-determined | Genome-fragment | NA | 0     | 0    |
| S11_k141_227042                      |           | 1396  | No  | NA  | 0  | 0  | Low-quality    | Genome-fragment | NA | 2.41  | 0    |
| S1-final-viral-combined_k141_244654  | [full]    | 2958  | No  | NA  | 0  | 3  | Not-determined | Genome-fragment | NA | 0     | 0    |
| S1-final-viral-combined_k141_293998  | [full]    | 1456  | No  | NA  | 0  | 0  | Not-determined | Genome-fragment | NA | 0     | 0    |
| S9_k141_36125                        |           | 1396  | No  | NA  | 0  | 0  | Low-quality    | Genome-fragment | NA | 2.33  | 0    |
| S1-final-viral-combined_k141_261681  | [full]    | 1244  | No  | NA  | 0  | 2  | Not-determined | Genome-fragment | NA | 0     | 0    |
| S1-final-viral-combined_k141_62943   | [full]    | 1380  | No  | NA  | 0  | 0  | Not-determined | Genome-fragment | NA | 0     | 0    |
| S1-final-viral-combined_k141_111033  | [full]    | 3028  | No  | NA  | 0  | 0  | Not-determined | Genome-fragment | NA | 0     | 0    |
| S5-final-viral-combined_k141_194871  | [full]    | 1396  | No  | NA  | 0  | 2  | Low-quality    | Genome-fragment | NA | 0.85  | 0    |
| S5_k141_11531                        |           | 1396  | No  | NA  | 1  | 0  | Low-quality    | Genome-fragment | NA | 0.9   | 0    |
| S17-final-viral-combined_k141_226139 | [full]    | 1396  | No  | NA  | 0  | 1  | Low-quality    | Genome-fragment | NA | 0.44  | 0    |
| S1-final-viral-combined_k141_62976   | [full]    | 1676  | No  | NA  | 0  | 1  | Not-determined | Genome-fragment | NA | 0     | 0    |
| S1-final-viral-combined_k141_195557  | [full]    | 1598  | No  | NA  | 0  | 1  | Not-determined | Genome-fragment | NA | 0     | 0    |
| S1-final-viral-combined_k141_391811  | [full]    | 2178  | No  | NA  | 0  | 1  | Not-determined | Genome-fragment | NA | 0     | 0    |
| S1-final-viral-combined_k141_391822  | [full]    | 1460  | No  | NA  | 0  | 2  | Not-determined | Genome-fragment | NA | 0     | 0    |
| S1-final-viral-combined_k141_195570  | [full]    | 3113  | No  | NA  | 0  | 2  | Not-determined | Genome-fragment | NA | 0     | 0    |
| S1-final-viral-combined_k141_63077   | [full]    | 1695  | No  | NA  | 0  | 2  | Not-determined | Genome-fragment | NA | 0     | 0    |
| S1-final-viral-combined_k141_130071  | [full]    | 6617  | No  | NA  | 0  | 3  | Not-determined | Genome-fragment | NA | 0     | 0    |
| S1-final-viral-combined_k141_244754  | [full]    | 2296  | No  | NA  | 0  | 0  | Not-determined | Genome-fragment | NA | 0     | 0    |
| S17-final-viral-combined_k141_216990 | [full]    | 1396  | No  | NA  | 1  | 0  | Low-quality    | Genome-fragment | NA | 3.49  | 0    |
| S1-final-viral-combined_k141_195608  | [full]    | 2408  | No  | NA  | 0  | 3  | Not-determined | Genome-fragment | NA | 0     | 0    |
| S1-final-viral-combined_k141_375745  | [full]    | 2017  | No  | NA  | 0  | 2  | Not-determined | Genome-fragment | NA | 0     | 0    |
| S12-final-viral-combined_k141_385080 | [full]    | 1396  | No  | NA  | 0  | 2  | Low-quality    | Genome-fragment | NA | 1.86  | 0    |
| S12_k141_391482                      |           | 1396  | No  | NA  | 0  | 0  | Low-quality    | Genome-fragment | NA | 3.57  | 0    |
| S1-final-viral-combined_k141_375782  | [full]    | 1375  | No  | NA  | 0  | 1  | Not-determined | Genome-fragment | NA | 0     | 0    |
| S1-final-viral-combined_k141_111169  | [full]    | 2231  | No  | NA  | 0  | 0  | Not-determined | Genome-fragment | NA | 0     | 0    |
| S1-final-viral-combined_k141_130175  | [full]    | 1428  | No  | NA  | 0  | 1  | Not-determined | Genome-fragment | NA | 0     | 0    |
| S1-final-viral-combined_k141_341544  | [full]    | 2525  | No  | NA  | 0  | 2  | Not-determined | Genome-fragment | NA | 0     | 0    |
| S2-final-viral-combined_k141_53243   | [full]    | 1396  | No  | NA  | 1  | 0  | Low-quality    | Genome-fragment | NA | 3.32  | 0    |
| S2-final-viral-combined_k141_111214  | [full]    | 1093  | No  | NA  | 0  | 0  | Not-determined | Genome-fragment | NA | 0     | 0    |
| S2-final-viral-combined_k141_146459  | [full]    | 1396  | No  | NA  | 0  | 0  | Low-quality    | Genome-fragment | NA | 3.04  | 0    |
| S1-final-viral-combined_k141_391910  | [full]    | 7107  | No  | NA  | 0  | 5  | Not-determined | Genome-fragment | NA | 0     | 0    |
| S1-final-viral-combined_k141_63151   | [full]    | 2518  | No  | NA  | 0  | 0  | Not-determined | Genome-fragment | NA | 3.04  | 0    |
| S2_k141_63752                        |           | 1396  | No  | NA  | 0  | 0  | Low-quality    | Genome-fragment | NA | 2.33  | 0    |
| S1-final-viral-combined_k141_391913  | [full]    | 1051  | No  | NA  | 0  | 2  | Not-determined | Genome-fragment | NA | 0     | 0    |
| S4-final-viral-combined_k141_114998  | [full]    | 1396  | No  | NA  | 0  | 0  | Low-quality    | Genome-fragment | NA | 2.69  | 0    |
| S1-final-viral-combined_k141_212231  | [full]    | 1772  | No  | NA  | 0  | 1  | Not-determined | Genome-fragment | NA | 0     | 0    |
| S1-final-viral-combined_k141_276816  | [full]    | 1225  | No  | NA  | 0  | 0  | Not-determined | Genome-fragment | NA | 0     | 0    |
| S1-final-viral-combined_k141_276817  | [full]    | 1535  | No  | NA  | 0  | 0  | Not-determined | Genome-fragment | NA | 0     | 0    |
| S1-final-viral-combined_k141_96143   | [full]    | 1130  | No  | NA  | 0  | 0  | Not-determined | Genome-fragment | NA | 0     | 0    |
| S1-final-viral-combined_k141_227971  | [full]    | 18499 | No  | NA  | 0  | 1  | Medium-quality | Genome-fragment | NA | 50.48 | 0    |
| S1-final-viral-combined_k141_227929  | [full]    | 2381  | No  | NA  | 0  | 1  | Not-determined | Genome-fragment | NA | 0     | 0    |
| S1-final-viral-combined_k141_244857  | [full]    | 6672  | No  | NA  | 0  | 5  | Not-determined | Genome-fragment | NA | 0     | 0    |
| S4-final-viral-combined_k141_160190  | [1/2gene] | 1396  | No  | NA  | 0  | 0  | Low-quality    | Genome-fragment | NA | 2.25  | 0    |
| S8-final-viral-combined_k141_184391  | [full]    | 1396  | No  | NA  | 1  | 0  | Low-quality    | Genome-fragment | NA | 3.4   | 0    |
| S1-final-viral-combined_k141_360189  | [full]    | 2983  | No  | NA  | 0  | 3  | Not-determined | Genome-fragment | NA | 0     | 0    |
| S1-final-viral-combined_k141_244849  | [full]    | 1869  | No  | NA  | 0  | 2  | Not-determined | Genome-fragment | NA | 0     | 0    |
| S8-final-viral-combined_k141_257723  | [full]    | 1396  | No  | NA  | 0  | 0  | Low-quality    | Genome-fragment | NA | 1.25  | 0    |
| S1-final-viral-combined_k141_347093  | [full]    | 1397  | No  | NA  | 0  | 0  | Low-quality    | Genome-fragment | NA | 2.96  | 0    |
| S5_k141_24507                        |           | 1397  | No  | NA  | 1  | 0  | Low-quality    | Genome-fragment | NA | 3.25  | 0    |
| S1-final-viral-combined_k141_161386  | [full]    | 3062  | No  | NA  | 0  | 2  | Not-determined | Genome-fragment | NA | 0     | 0    |
| S17-final-viral-combined_k141_52862  | [1/2gene] | 1397  | No  | NA  | 1  | 0  | Low-quality    | Genome-fragment | NA | 3.46  | 0    |
| S1-final-viral-combined_k141_29625   | [full]    | 4934  | No  | NA  | 0  | 0  | Not-determined | Genome-fragment | NA | 0     | 0    |
| S1-final-viral-combined_k141_391970  | [full]    | 1650  | No  | NA  | 0  | 0  | Not-determined | Genome-fragment | NA | 0     | 0    |
| S1-final-viral-combined_k141_342044  | [full]    | 1582  | No  | NA  | 0  | 0  | Not-determined | Genome-fragment | NA | 0     | 0    |
| S1-final-viral-combined_k141_111297  | [full]    | 1918  | No  | NA  | 0  | 2  | Not-determined | Genome-fragment | NA | 0     | 0    |
| S12-final-viral-combined_k141_205099 | [full]    | 1397  | No  | NA  | 0  | 0  | Low-quality    | Genome-fragment | NA | 3.3   | 0    |
| S1-final-viral-combined_k141_391974  | [full]    | 4486  | No  | NA  | 0  | 0  | Not-determined | Genome-fragment | NA | 0     | 0    |
| S1-final-viral-combined_k141_212493  | [full]    | 1886  | No  | NA  | 0  | 0  | Not-determined | Genome-fragment | NA | 0     | 0    |
| S12-final-viral-combined_k141_56856  | [full]    | 1397  | No  | NA  | 1  | 0  | Low-quality    | Genome-fragment | NA | 2.6   | 0    |
| S6-final-viral-combined_k141_36578   | [full]    | 1397  | No  | NA  | 0  | 1  | Low-quality    | Genome-fragment | NA | 1.79  | 0    |
| S1-final-viral-combined_k141_262040  | [full]    | 2262  | No  | NA  | 0  | 1  | Not-determined | Genome-fragment | NA | 0     | 0    |
| S1-final-viral-combined_k141_276911  | [full]    | 7487  | No  | NA  | 0  | 1  | Not-determined | Genome-fragment | NA | 0     | 0    |
| S1-final-viral-combined_k141_212316  | [full]    | 1164  | No  | NA  | 0  | 1  | Not-determined | Genome-fragment | NA | 0     | 0    |
| S8-final-viral-combined_k141_71446   | [full]    | 1397  | No  | NA  | 0  | 0  | Low-quality    | Genome-fragment | NA | 2.88  | 0    |
| S1-final-viral-combined_k141_63216   | [full]    | 5240  | No  | NA  | 0  | 4  | Not-determined | Genome-fragment | NA | 0     | 0    |
| S1-final-viral-combined_k141_14015   | [full]    | 5176  | No  | NA  | 0  | 1  | Not-determined | Genome-fragment | NA | 0     | 0    |
| S1-final-viral-combined_k141_195867  | [full]    | 1579  | No  | NA  | 0  | 0  | Not-determined | Genome-fragment | NA | 0     | 0    |
| S9-final-viral-combined_k141_63506   | [full]    | 1398  | No  | NA  | 0  | 0  | Low-quality    | Genome-fragment | NA | 3.32  | 0    |
| S11-final-viral-combined_k141_11005  | [full]    | 1398  | No  | NA  | 1  | 0  | Low-quality    | Genome-fragment | NA | 3.15  | 0    |
| S1-final-viral-combined_k141_111366  | [full]    | 3711  | No  | NA  | 0  | 0  | Not-determined | Genome-fragment | NA | 0     | 0    |
| S11-final-viral-combined_k141_54592  | [full]    | 1398  | No  | NA  | 0  | 0  | Low-quality    | Genome-fragment | NA | 2.94  | 0    |
| S1-final-viral-combined_k141_161472  | [full]    | 1471  | No  | NA  | 0  | 0  | Not-determined | Genome-fragment | NA | 0     | 0    |
| S1-final-viral-combined_k141_244966  | [full]    | 1754  | No  | NA  | 0  | 0  | Not-determined | Genome-fragment | NA | 0     | 0    |
| S3-final-viral-combined_k141_53328   | [full]    | 1398  | No  | NA  | 0  | 1  | Low-quality    | Genome-fragment | NA | 0.66  | 0    |
| S1-final-viral-combined_k141_195909  | [full]    | 1267  | No  | NA  | 0  | 2  | Not-determined | Genome-fragment | NA | 1.99  | 0    |
| S5-final-viral-combined_k141_47566   | [full]    | 1398  | No  | NA  | 0  | 0  | Low-quality    | Genome-fragment | NA | 0     | 0    |
| S1-final-viral-combined_k141_327240  | [full]    | 3339  | No  | NA  | 0  | 0  | Not-determined | Genome-fragment | NA | 0     | 0    |
| S1-final-viral-combined_k141_360285  | [full]    | 40364 | No  | NA  | 17 | 4  | Medium-quality | Genome-fragment | NA | 81.89 | 0    |
| S1-final-viral-combined_k141_113382  | [full]    | 2261  | No  | NA  | 0  | 2  | Not-determined | Genome-fragment | NA | 0     | 0    |
| S1-final-viral-combined_k141_362091  | [full]    | 13847 | No  | NA  | 0  | 7  | Not-determined | Genome-fragment | NA | 0     | 0    |
| S5-final-viral-combined_k141_32405   | [full]    | 1398  | No  | NA  | 2  | 0  | Low-quality    | Genome-fragment | NA | 2.25  | 0    |
| S1-final-viral-combined_k141_130297  | [full]    | 1936  | No  | NA  | 0  | 0  | Not-determined | Genome-fragment | NA | 0     | 0    |
| S5-final-viral-combined_k141_194497  | [full]    | 1398  | No  | NA  | 0  | 0  | Low-quality    | Genome-fragment | NA | 3.49  | 0    |
| S1-final-viral-combined_k141_29703   | [full]    | 1147  | No  | NA  | 0  | 0  | Not-determined | Genome-fragment | NA | 0     | 0    |
| S1-final-viral-combined_k141_78621   | [full]    | 1694  | No  | NA  | 0  | 2  | Not-determined | Genome-fragment | NA | 0     | 0    |
| S17-final-viral-combined_k141_179235 | [full]    | 1398  | No  | NA  | 0  | 0  | Low-quality    | Genome-fragment | NA | 2.48  | 0    |
| S12-final-viral-combined_k141_262316 | [full]    | 1398  | No  | NA  | 0  | 1  | Low-quality    | Genome-fragment | NA | 2.03  | 0    |
| S12-final-viral-combined_k141_66411  | [1/2gene] | 1398  | No  | NA  | 1  | 0  | Low-quality    | Genome-fragment | NA | 2.56  | 0    |
| S2-final-viral-combined_k141_138138  | [full]    | 1398  | No  | NA  | 0  | 0  | Low-quality    | Genome-fragment | NA | 2.4   | 0    |
| S6-final-viral-combined_k141_70158   | [full]    | 1398  | No  | NA  | 0  | 1  | Low-quality    | Genome-fragment | NA | 1.66  | 0    |
| S11-final-viral-combined_k141_304497 | [full]    | 1399  | No  | NA  | 0  | 0  | Low-quality    | Genome-fragment | NA | 1.64  | 0    |
| S11-final-viral-combined_k141_239327 | [full]    | 1399  | No  | NA  | 1  | 0  | Low-quality    | Genome-fragment | NA | 2.53  | 0    |
| S1-final-viral-combined_k141_145431  | [full]    | 2205  | No  | NA  | 0  | 1  | Not-determined | Genome-fragment | NA |       |      |



|                                      |          |       |     |    |    |    |                |                 |       |       |
|--------------------------------------|----------|-------|-----|----|----|----|----------------|-----------------|-------|-------|
| S9-final-viral-combined_k141_448661  | [full]   | 1401  | No  | NA | 1  | 0  | Low-quality    | Genome-fragment | 3.52  | 0     |
| S1-final-viral-combined_k141_242449  | [full]   | 5185  | No  | NA | 0  | 5  | Not-determined | Genome-fragment | NA    | 0     |
| S11-final-viral-combined_k141_181809 | [full]   | 1401  | No  | NA | 0  | 0  | Low-quality    | Genome-fragment | 2.22  | 0     |
| S1-final-viral-combined_k141_262365  | [full]   | 1712  | No  | NA | 0  | 2  | Not-determined | Genome-fragment | NA    | 0     |
| S1-final-viral-combined_k141_314341  | [full]   | 1401  | No  | NA | 0  | 1  | Low-quality    | Genome-fragment | 1.08  | 0     |
| S1-final-viral-combined_k141_392371  | [full]   | 2003  | No  | NA | 0  | 1  | Not-determined | Genome-fragment | NA    | 0     |
| S1-final-viral-combined_k141_196245  | [full]   | 1752  | No  | NA | 0  | 2  | Not-determined | Genome-fragment | NA    | 0     |
| S3-final-viral-combined_k141_79571   | [H2gene] | 1401  | No  | NA | 1  | 0  | Low-quality    | Genome-fragment | 3.25  | 0     |
| S1-final-viral-combined_k141_1776    | [full]   | 1017  | No  | NA | 0  | 2  | Not-determined | Genome-fragment | NA    | 0     |
| S1-final-viral-combined_k141_130517  | [full]   | 1803  | No  | NA | 0  | 2  | Not-determined | Genome-fragment | NA    | 0     |
| S7-final-viral-combined_k141_228835  | [full]   | 1401  | No  | NA | 2  | 0  | Low-quality    | Genome-fragment | 2.5   | 0     |
| S1-final-viral-combined_k141_161767  | [full]   | 1046  | No  | NA | 0  | 1  | Not-determined | Genome-fragment | NA    | 0     |
| S1-final-viral-combined_k141_294609  | [full]   | 1940  | No  | NA | 0  | 0  | Not-determined | Genome-fragment | NA    | 0     |
| S1-final-viral-combined_k141_342407  | [full]   | 6208  | No  | NA | 0  | 2  | Not-determined | Genome-fragment | NA    | 0     |
| S1-final-viral-combined_k141_161810  | [full]   | 2700  | No  | NA | 0  | 1  | Not-determined | Genome-fragment | NA    | 0     |
| S17-k141_143001                      | [full]   | 1401  | No  | NA | 0  | 1  | Low-quality    | Genome-fragment | 2.77  | 0     |
| S1-final-viral-combined_k141_130541  | [full]   | 2838  | No  | NA | 0  | 1  | Not-determined | Genome-fragment | NA    | 0     |
| S1-final-viral-combined_k141_342429  | [full]   | 5111  | No  | NA | 0  | 3  | Not-determined | Genome-fragment | NA    | 0     |
| S1-final-viral-combined_k141_636211  | [full]   | 9421  | No  | NA | 0  | 4  | Not-determined | Genome-fragment | NA    | 0     |
| S1-final-viral-combined_k141_96569   | [full]   | 2603  | No  | NA | 0  | 0  | Not-determined | Genome-fragment | NA    | 0     |
| S12-final-viral-combined_k141_335881 | [full]   | 1401  | No  | NA | 1  | 0  | Low-quality    | Genome-fragment | 2.37  | 0     |
| S1-final-viral-combined_k141_293204  | [full]   | 3564  | No  | NA | 0  | 3  | Not-determined | Genome-fragment | NA    | 0     |
| S1-final-viral-combined_k141_30095   | [full]   | 1682  | No  | NA | 0  | 0  | Not-determined | Genome-fragment | NA    | 0     |
| S1-final-viral-combined_k141_212892  | [full]   | 22088 | No  | NA | 9  | 0  | Medium-quality | Genome-fragment | 56.33 | 0     |
| S2-final-viral-combined_k141_20227   | [full]   | 1401  | No  | NA | 1  | 0  | Low-quality    | Genome-fragment | 2.24  | 0     |
| S1-final-viral-combined_k141_242497  | [full]   | 1726  | No  | NA | 0  | 2  | Not-determined | Genome-fragment | NA    | 0     |
| S1-final-viral-combined_k141_294694  | [full]   | 2242  | No  | NA | 0  | 1  | Not-determined | Genome-fragment | NA    | 0     |
| S11-final-viral-combined_k141_235220 | [full]   | 1402  | No  | NA | 1  | 0  | Low-quality    | Genome-fragment | 2.17  | 0     |
| S11-final-viral-combined_k141_214665 | [full]   | 1402  | No  | NA | 0  | 1  | Low-quality    | Genome-fragment | 3.81  | 0     |
| S1-final-viral-combined_k141_196382  | [full]   | 19410 | No  | NA | 0  | 5  | Not-determined | Genome-fragment | NA    | 0     |
| S11_k141_253637                      | [full]   | 1402  | No  | NA | 0  | 1  | Low-quality    | Genome-fragment | 3.95  | 0     |
| S1-final-viral-combined_k141_342553  | [full]   | 2033  | No  | NA | 0  | 2  | Not-determined | Genome-fragment | NA    | 0     |
| S1-final-viral-combined_k141_294729  | [full]   | 6787  | No  | NA | 0  | 6  | Not-determined | Genome-fragment | NA    | 0     |
| S1-final-viral-combined_k141_301377  | [full]   | 1901  | No  | NA | 0  | 2  | Not-determined | Genome-fragment | NA    | 0     |
| S1-final-viral-combined_k141_262512  | [full]   | 8540  | No  | NA | 0  | 5  | Not-determined | Genome-fragment | NA    | 0     |
| S1-final-viral-combined_k141_367674  | [full]   | 1770  | No  | NA | 0  | 1  | Not-determined | Genome-fragment | NA    | 0     |
| S5-final-viral-combined_k141_163126  | [full]   | 1402  | No  | NA | 1  | 0  | Low-quality    | Genome-fragment | 1.57  | 0     |
| S1-final-viral-combined_k141_96708   | [full]   | 4235  | No  | NA | 0  | 3  | Not-determined | Genome-fragment | NA    | 0     |
| S5-final-viral-combined_k141_120306  | [full]   | 1402  | No  | NA | 0  | 1  | Low-quality    | Genome-fragment | 2.87  | 0     |
| S7-final-viral-combined_k141_154160  | [full]   | 1402  | No  | NA | 0  | 0  | Low-quality    | Genome-fragment | 2.73  | 0     |
| S17-final-viral-combined_k141_146853 | [full]   | 1402  | No  | NA | 0  | 2  | Low-quality    | Genome-fragment | 3.27  | 0     |
| S12-final-viral-combined_k141_262365 | [full]   | 1402  | No  | NA | 0  | 0  | Low-quality    | Genome-fragment | 4.38  | 0     |
| S1-final-viral-combined_k141_30190   | [full]   | 2281  | No  | NA | 0  | 1  | Not-determined | Genome-fragment | NA    | 0     |
| S4_k141_25661                        | [full]   | 1402  | No  | NA | 0  | 1  | Low-quality    | Genome-fragment | 2.39  | 0     |
| S1-final-viral-combined_k141_36744   | [full]   | 13025 | No  | NA | 0  | 3  | Not-determined | Genome-fragment | NA    | 0     |
| S1-final-viral-combined_k141_14442   | [full]   | 2168  | No  | NA | 0  | 2  | Not-determined | Genome-fragment | NA    | 0     |
| S8-final-viral-combined_k141_33827   | [full]   | 1402  | No  | NA | 0  | 2  | Low-quality    | Genome-fragment | 0.48  | 0     |
| S1-final-viral-combined_k141_177882  | [full]   | 2511  | No  | NA | 0  | 0  | Not-determined | Genome-fragment | NA    | 0     |
| S1-final-viral-combined_k141_130073  | [full]   | 1372  | No  | NA | 0  | 1  | Not-determined | Genome-fragment | NA    | 0     |
| S1-final-viral-combined_k141_327763  | [full]   | 1665  | No  | NA | 0  | 1  | Not-determined | Genome-fragment | NA    | 0     |
| S9_k141_71579                        | [full]   | 1403  | No  | NA | 1  | 0  | Low-quality    | Genome-fragment | 3.9   | 0     |
| S1-final-viral-combined_k141_30368   | [full]   | 1299  | No  | NA | 0  | 1  | Not-determined | Genome-fragment | NA    | 0     |
| S11_k141_256064                      | [full]   | 1403  | No  | NA | 1  | 0  | Low-quality    | Genome-fragment | 1.49  | 0     |
| S1-final-viral-combined_k141_85652   | [full]   | 1403  | No  | NA | 0  | 2  | Low-quality    | Genome-fragment | 0.9   | 0     |
| S5-final-viral-combined_k141_23314   | [full]   | 1403  | No  | NA | 1  | 0  | Low-quality    | Genome-fragment | 0.87  | 0     |
| S1-final-viral-combined_k141_36848   | [full]   | 1534  | No  | NA | 0  | 1  | Not-determined | Genome-fragment | NA    | 0     |
| S1-final-viral-combined_k141_14519   | [full]   | 3505  | No  | NA | 0  | 0  | Not-determined | Genome-fragment | NA    | 0     |
| S1-final-viral-combined_k141_63789   | [full]   | 7809  | No  | NA | 0  | 2  | Not-determined | Genome-fragment | NA    | 0     |
| S5-final-viral-combined_k141_9241    | [H2gene] | 1403  | No  | NA | 0  | 1  | Low-quality    | Genome-fragment | 0.91  | 0     |
| S1-final-viral-combined_k141_277430  | [full]   | 9829  | No  | NA | 0  | 5  | Not-determined | Genome-fragment | NA    | 0     |
| S7_k141_235448                       | [full]   | 1403  | No  | NA | 0  | 1  | Low-quality    | Genome-fragment | 0.37  | 0     |
| S1-final-viral-combined_k141_14545   | [full]   | 1915  | No  | NA | 0  | 1  | Not-determined | Genome-fragment | NA    | 0     |
| S17-final-viral-combined_k141_175998 | [full]   | 1403  | No  | NA | 1  | 0  | Low-quality    | Genome-fragment | 1.03  | 0     |
| S1-final-viral-combined_k141_162071  | [full]   | 7200  | No  | NA | 0  | 4  | Not-determined | Genome-fragment | NA    | 0     |
| S17-k141_187442                      | [full]   | 1403  | No  | NA | 0  | 0  | Low-quality    | Genome-fragment | 3.14  | 0     |
| S1-final-viral-combined_k141_245656  | [full]   | 2212  | No  | NA | 0  | 1  | Not-determined | Genome-fragment | NA    | 0     |
| S1-final-viral-combined_k141_111757  | [full]   | 2907  | No  | NA | 0  | 2  | Not-determined | Genome-fragment | NA    | 0     |
| S1-final-viral-combined_k141_245665  | [full]   | 2715  | No  | NA | 0  | 2  | Not-determined | Genome-fragment | NA    | 0     |
| S1-final-viral-combined_k141_14568   | [full]   | 2961  | No  | NA | 0  | 0  | Not-determined | Genome-fragment | NA    | 0     |
| S12_k141_167245                      | [full]   | 1403  | No  | NA | 0  | 1  | Low-quality    | Genome-fragment | 0.87  | 0     |
| S1-final-viral-combined_k141_160771  | [full]   | 15514 | No  | NA | 0  | 12 | Not-determined | Genome-fragment | NA    | 0     |
| S1-final-viral-combined_k141_262468  | [full]   | 7816  | No  | NA | 0  | 3  | Not-determined | Genome-fragment | NA    | 0     |
| S2-final-viral-combined_k141_159159  | [full]   | 1403  | No  | NA | 0  | 0  | Low-quality    | Genome-fragment | 3.27  | 0     |
| S2-final-viral-combined_k141_68212   | [full]   | 1403  | No  | NA | 0  | 1  | Low-quality    | Genome-fragment | 2.52  | 0     |
| S1-final-viral-combined_k141_260766  | [full]   | 1400  | No  | NA | 0  | 0  | Not-determined | Genome-fragment | NA    | 0     |
| S1-final-viral-combined_k141_277494  | [full]   | 2251  | No  | NA | 0  | 0  | Not-determined | Genome-fragment | NA    | 0     |
| S4-final-viral-combined_k141_109734  | [full]   | 1403  | No  | NA | 0  | 0  | Low-quality    | Genome-fragment | 2.83  | 0     |
| S1-final-viral-combined_k141_162158  | [full]   | 4450  | No  | NA | 0  | 1  | Not-determined | Genome-fragment | NA    | 0     |
| S1-final-viral-combined_k141_314131  | [full]   | 10389 | No  | NA | 11 | 0  | Not-determined | Genome-fragment | NA    | 0     |
| S6-final-viral-combined_k141_92261   | [H2gene] | 1403  | No  | NA | 1  | 0  | Low-quality    | Genome-fragment | 2.82  | 0     |
| S1-final-viral-combined_k141_178042  | [full]   | 2484  | No  | NA | 0  | 1  | Not-determined | Genome-fragment | NA    | 0     |
| S8-final-viral-combined_k141_162500  | [full]   | 1403  | No  | NA | 0  | 0  | Low-quality    | Genome-fragment | 1.9   | 0     |
| S8-final-viral-combined_k141_197065  | [full]   | 1403  | No  | NA | 0  | 0  | Low-quality    | Genome-fragment | 2.8   | 0     |
| S1-final-viral-combined_k141_392563  | [full]   | 1935  | No  | NA | 0  | 2  | Not-determined | Genome-fragment | NA    | 0     |
| S8-final-viral-combined_k141_250362  | [full]   | 1403  | No  | NA | 0  | 1  | Low-quality    | Genome-fragment | 2.56  | 0     |
| S1-final-viral-combined_k141_96933   | [full]   | 2481  | No  | NA | 0  | 2  | Not-determined | Genome-fragment | NA    | 0     |
| S11-final-viral-combined_k141_138104 | [full]   | 1404  | No  | NA | 0  | 0  | Low-quality    | Genome-fragment | 1.08  | 0     |
| S1-final-viral-combined_k141_14620   | [full]   | 2688  | No  | NA | 0  | 3  | Not-determined | Genome-fragment | NA    | 0     |
| S1-final-viral-combined_k141_277574  | [full]   | 3274  | No  | NA | 0  | 3  | Not-determined | Genome-fragment | NA    | 0     |
| S1-final-viral-combined_k141_242839  | [full]   | 6548  | No  | NA | 0  | 3  | Not-determined | Genome-fragment | NA    | 0     |
| S1-final-viral-combined_k141_241449  | [full]   | 1404  | No  | NA | 0  | 1  | Low-quality    | Genome-fragment | 2.57  | 0     |
| S17-final-viral-combined_k141_320251 | [full]   | 1404  | No  | NA | 0  | 0  | Low-quality    | Genome-fragment | 0.68  | 0     |
| S12-final-viral-combined_k141_256488 | [full]   | 1404  | No  | NA | 2  | 0  | Low-quality    | Genome-fragment | 2.78  | 0     |
| S12_k141_286254                      | [full]   | 1404  | No  | NA | 0  | 0  | Low-quality    | Genome-fragment | 1.39  | 0     |
| S4_k141_151089                       | [full]   | 1404  | No  | NA | 0  | 1  | Low-quality    | Genome-fragment | 1.41  | 0     |
| S9_k141_64718                        | [full]   | 1405  | No  | NA | 1  | 0  | Low-quality    | Genome-fragment | 2.79  | 0     |
| S1-final-viral-combined_k141_299371  | [full]   | 1405  | No  | NA | 0  | 0  | Low-quality    | Genome-fragment | 3.65  | 0     |
| S5-final-viral-combined_k141_32073   | [full]   | 1405  | No  | NA | 0  | 0  | Low-quality    | Genome-fragment | 2.45  | 0     |
| S1-final-viral-combined_k141_30471   | [full]   | 3012  | No  | NA | 0  | 2  | Not-determined | Genome-fragment | NA    | 0     |
| S1-final-viral-combined_k141_96973   | [full]   | 2784  | No  | NA | 0  | 2  | Not-determined | Genome-fragment | NA    | 0     |
| S1-final-viral-combined_k141_160908  | [full]   | 2311  | No  | NA | 0  | 1  | Not-determined | Genome-fragment | NA    | 0     |
| S1-final-viral-combined_k141_130899  | [full]   | 1512  | No  | NA | 0  | 0  | Not-determined | Genome-fragment | NA    | 0     |
| S7_k141_32386                        | [full]   | 1405  | No  | NA | 0  | 0  | Low-quality    | Genome-fragment | 1.33  | 0     |
| S1-final-viral-combined_k141_96982   | [full]   | 1183  | No  | NA | 0  | 1  | Not-determined | Genome-fragment | NA    | 0     |
| S1-final-viral-combined_k141_262781  | [full]   | 2045  | No  | NA | 0  | 2  | Not-determined | Genome-fragment | NA    | 0     |
| S17-final-viral-combined_k141_67205  | [H2gene] | 1405  | No  | NA | 1  | 0  | Low-quality    | Genome-fragment | 3.83  | 0     |
| S17-final-viral-combined_k141_204368 | [H2gene] | 1405  | No  | NA | 1  | 0  | Low-quality    | Genome-fragment | 2.19  | 0     |
| S12_k141_198456                      | [full]   | 1405  | No  | NA | 0  | 0  | Low-quality    | Genome-fragment | 0.77  | 0     |
| S2-final-viral-combined_k141_176384  | [full]   | 1405  | No  | NA | 0  | 0  | Low-quality    | Genome-fragment | 2.87  | 0     |
| S1-final-viral-combined_k141_111905  | [full]   | 8392  | No  | NA | 0  | 6  | Not-determined | Genome-fragment | NA    | 0     |
| S2-final-viral-combined_k141_75930   | [full]   | 1405  | Yes | NA | 1  | 1  | Low-quality    | Genome-fragment | 0.14  | 75.37 |
| S2-final-viral-combined_k141_246569  | [full]   | 1405  | No  | NA | 1  | 0  | Low-quality    | Genome-fragment | 0.45  | 0     |
| S1-final-viral-combined_k141_342937  | [full]   | 1493  | No  | NA | 0  | 0  | Not-determined | Genome-fragment | NA    | 0     |
| S4-final-viral-combined_k141_130688  | [full]   | 1405  | No  | NA | 0  | 0  | Low-quality    | Genome-fragment | 3.67  | 0     |
| S1-final-viral-combined_k141_392674  | [full]   | 8872  | No  | NA | 0  | 6  | Not-determined | Genome-fragment | NA    | 0     |
| S4-final-viral-combined_k141_34100   | [full]   | 1405  | No  | NA | 3  | 0  | Low-quality    | Genome-fragment | 2.33  | 0     |
| S8-final-viral-combined_k141_196854  | [full]   | 1405  | No  | NA | 0  | 2  | Low-quality    | Genome-fragment | 1.01  | 0     |
| S8_k141_63621                        | [full]   | 1405  | No  | NA | 0  | 0  | Low-quality    | Genome-fragment | 0.91  | 0     |
| S1-final-viral-combined_k141_111943  | [full]   | 3930  | No  | NA | 0  | 4  | Not-determined | Genome-fragment | NA    | 0     |
| S9-final-viral-combined_k141_73568   | [full]   | 1406  | No  | NA | 0  | 2  | Low-quality    | Genome-fragment | 0.36  | 0     |
| S3-final-viral-combined_k141_70155   | [full]   | 1406  | No  | NA | 0  | 2  | Low-quality    | Genome-fragment | 1.23  | 0     |
| S7-final-viral-combined_k141_233893  | [full]   | 1406  | No  | NA | 0  | 0  | Low-quality    | Genome-fragment | 3.25  | 0     |
| S12-final-viral-combined_k141_152710 | [full]   | 1406  | No  | NA | 2  | 0  | Low-quality    | Genome-fragment | 2.51  | 0     |
| S12-final-viral-combined_k141_106609 | [full]   | 1406  | No  | NA | 0  | 1  | Low-quality    | Genome-fragment | 1.03  | 0     |
| S1-final-viral-combined_k141_196594  | [full]   | 8886  | No  | NA | 10 | 0  | Not-determined | Genome-fragment | NA    | 0     |
| S1-final-viral-combined_k141_14799   | [full]   | 1184  | No  | NA | 0  | 2  | Not-determined | Genome-fragment | NA    | 0     |
| S12-final-viral-combined_k141_126650 | [full]   | 1406  | No  | NA | 2  | 0  | Low-quality    | Genome-fragment | 2.96  | 0     |
| S12_k141_249948                      | [full]   | 1406  | No  | NA | 1  | 1  | Low-quality    | Genome-fragment | 0.42  | 0     |
| S1-final-viral-combined_k141_196600  | [full]   | 2384  | No  | NA | 0  | 1  | Not-determined | Genome-fragment | NA    | 0     |
| S2-final-viral-combined_k141_124498  | [full]   | 1406  | No  | NA | 0  | 0  |                |                 |       |       |



|                                      |          |       |    |    |    |   |                |                 |       |   |
|--------------------------------------|----------|-------|----|----|----|---|----------------|-----------------|-------|---|
| S1-final-viral-combined_k141_198889  | [full]   | 1409  | No | NA | 1  | 0 | Low-quality    | Genome-fragment | 3.73  | 0 |
| S1-final-viral-combined_k141_195686  | [full]   | 1409  | No | NA | 2  | 0 | Low-quality    | Genome-fragment | 0.31  | 0 |
| S3-final-viral-combined_k141_117599  | [full]   | 1409  | No | NA | 0  | 0 | Low-quality    | Genome-fragment | 30.22 | 0 |
| S1-final-viral-combined_k141_15006   | [full]   | 2288  | No | NA | 0  | 1 | Not-determined | Genome-fragment | NA    | 0 |
| S1-final-viral-combined_k141_311524  | [full]   | 1070  | No | NA | 0  | 2 | Not-determined | Genome-fragment | NA    | 0 |
| S1-final-viral-combined_k141_277956  | [full]   | 1314  | No | NA | 0  | 1 | Not-determined | Genome-fragment | NA    | 0 |
| S1-final-viral-combined_k141_30797   | [full]   | 2608  | No | NA | 0  | 2 | Not-determined | Genome-fragment | NA    | 0 |
| S5-final-viral-combined_k141_41033   | [full]   | 1409  | No | NA | 0  | 1 | Low-quality    | Genome-fragment | 3.41  | 0 |
| S1-final-viral-combined_k141_24603   | [full]   | 1277  | No | NA | 0  | 2 | Not-determined | Genome-fragment | NA    | 0 |
| S1-final-viral-combined_k141_377005  | [full]   | 5271  | No | NA | 0  | 5 | Not-determined | Genome-fragment | NA    | 0 |
| S1-final-viral-combined_k141_162599  | [full]   | 1421  | No | NA | 0  | 2 | Not-determined | Genome-fragment | NA    | 0 |
| S7-final-viral-combined_k141_234312  | [full]   | 1409  | No | NA | 0  | 0 | Low-quality    | Genome-fragment | 2.92  | 0 |
| S17-final-viral-combined_k141_48340  | [full]   | 1409  | No | NA | 1  | 0 | Low-quality    | Genome-fragment | 3.07  | 0 |
| S12-final-viral-combined_k141_323151 | [full]   | 1409  | No | NA | 1  | 0 | Low-quality    | Genome-fragment | 1.8   | 0 |
| S12-final-viral-combined_k141_246838 | [full]   | 1409  | No | NA | 0  | 1 | Low-quality    | Genome-fragment | 0.89  | 0 |
| S1-final-viral-combined_k141_156623  | [full]   | 2800  | No | NA | 0  | 3 | Not-determined | Genome-fragment | NA    | 0 |
| S1-final-viral-combined_k141_246087  | [full]   | 1274  | No | NA | 0  | 2 | Not-determined | Genome-fragment | NA    | 0 |
| S1-final-viral-combined_k141_196828  | [full]   | 7360  | No | NA | 0  | 4 | Not-determined | Genome-fragment | NA    | 0 |
| S1-final-viral-combined_k141_243251  | [full]   | 5265  | No | NA | 0  | 2 | Not-determined | Genome-fragment | NA    | 0 |
| S1-final-viral-combined_k141_263032  | [full]   | 4804  | No | NA | 0  | 0 | Not-determined | Genome-fragment | NA    | 0 |
| S12-final-viral-combined_k141_50133  | [full]   | 1409  | No | NA | 0  | 2 | Low-quality    | Genome-fragment | 0.45  | 0 |
| S1-final-viral-combined_k141_46780   | [full]   | 1123  | No | NA | 0  | 1 | Not-determined | Genome-fragment | NA    | 0 |
| S1-final-viral-combined_k141_377044  | [full]   | 2306  | No | NA | 0  | 2 | Not-determined | Genome-fragment | NA    | 0 |
| S4-final-viral-combined_k141_17882   | [H2gene] | 1409  | No | NA | 1  | 0 | Low-quality    | Genome-fragment | 3.28  | 0 |
| S1-final-viral-combined_k141_342385  | [full]   | 1188  | No | NA | 0  | 0 | Not-determined | Genome-fragment | NA    | 0 |
| S1-final-viral-combined_k141_379745  | [full]   | 3058  | No | NA | 0  | 0 | Not-determined | Genome-fragment | NA    | 0 |
| S6-final-viral-combined_k141_21410   | [full]   | 1409  | No | NA | 1  | 0 | Low-quality    | Genome-fragment | 2.37  | 0 |
| S8-final-viral-combined_k141_206688  | [full]   | 1409  | No | NA | 0  | 0 | Low-quality    | Genome-fragment | 2.93  | 0 |
| S8-final-viral-combined_k141_184955  | [H2gene] | 1409  | No | NA | 2  | 0 | Low-quality    | Genome-fragment | 2.36  | 0 |
| S8_k141_169428                       |          | 1409  | No | NA | 0  | 0 | Low-quality    | Genome-fragment | 0.27  | 0 |
| S1-final-viral-combined_k141_295384  | [full]   | 3321  | No | NA | 0  | 3 | Not-determined | Genome-fragment | NA    | 0 |
| S1-final-viral-combined_k141_392866  | [full]   | 2404  | No | NA | 0  | 1 | Not-determined | Genome-fragment | NA    | 0 |
| S9_k141_30140                        |          | 1410  | No | NA | 1  | 0 | Low-quality    | Genome-fragment | 2.87  | 0 |
| S1-final-viral-combined_k141_97358   | [full]   | 4144  | No | NA | 0  | 1 | Not-determined | Genome-fragment | NA    | 0 |
| S5-final-viral-combined_k141_205934  | [full]   | 1410  | No | NA | 3  | 0 | Low-quality    | Genome-fragment | 4.4   | 0 |
| S1-final-viral-combined_k141_343120  | [full]   | 1412  | No | NA | 0  | 1 | Not-determined | Genome-fragment | NA    | 0 |
| S1-final-viral-combined_k141_312170  | [full]   | 38955 | No | NA | 18 | 0 | High-quality   | High-quality    | 92.32 | 0 |
| S1-final-viral-combined_k141_278071  | [full]   | 2025  | No | NA | 0  | 1 | Not-determined | Genome-fragment | NA    | 0 |
| S1-final-viral-combined_k141_151141  | [full]   | 1192  | No | NA | 0  | 9 | Not-determined | Genome-fragment | NA    | 0 |
| S17-final-viral-combined_k141_39129  | [full]   | 1410  | No | NA | 0  | 0 | Low-quality    | Genome-fragment | 4.46  | 0 |
| S17_k141_188948                      |          | 1410  | No | NA | 1  | 0 | Low-quality    | Genome-fragment | 4.34  | 0 |
| S1-final-viral-combined_k141_328479  | [full]   | 6665  | No | NA | 2  | 2 | Not-determined | Genome-fragment | NA    | 0 |
| S1-final-viral-combined_k141_263102  | [full]   | 1171  | No | NA | 0  | 2 | Not-determined | Genome-fragment | NA    | 0 |
| S1-final-viral-combined_k141_30961   | [full]   | 8961  | No | NA | 0  | 5 | Not-determined | Genome-fragment | NA    | 0 |
| S1-final-viral-combined_k141_37406   | [full]   | 6420  | No | NA | 0  | 3 | Not-determined | Genome-fragment | NA    | 0 |
| S17_k141_41652                       |          | 1410  | No | NA | 0  | 0 | Low-quality    | Genome-fragment | 0.79  | 0 |
| S12-final-viral-combined_k141_138893 | [full]   | 1410  | No | NA | 0  | 0 | Low-quality    | Genome-fragment | 3.59  | 0 |
| S1-final-viral-combined_k141_361307  | [full]   | 2051  | No | NA | 0  | 0 | Not-determined | Genome-fragment | NA    | 0 |
| S4-final-viral-combined_k141_119987  | [full]   | 1410  | No | NA | 0  | 0 | Low-quality    | Genome-fragment | 2.04  | 0 |
| S1-final-viral-combined_k141_328503  | [full]   | 7085  | No | NA | 0  | 3 | Not-determined | Genome-fragment | NA    | 0 |
| S4-final-viral-combined_k141_30509   | [full]   | 1410  | No | NA | 0  | 0 | Low-quality    | Genome-fragment | 2.72  | 0 |
| S1-final-viral-combined_k141_37446   | [full]   | 1581  | No | NA | 0  | 2 | Not-determined | Genome-fragment | NA    | 0 |
| S1-final-viral-combined_k141_162832  | [full]   | 3707  | No | NA | 0  | 2 | Not-determined | Genome-fragment | NA    | 0 |
| S4_k141_58524                        |          | 1410  | No | NA | 0  | 0 | Low-quality    | Genome-fragment | 1.37  | 0 |
| S8-final-viral-combined_k141_247623  | [full]   | 1410  | No | NA | 0  | 2 | Low-quality    | Genome-fragment | 2.36  | 0 |
| S1-final-viral-combined_k141_295527  | [full]   | 1996  | No | NA | 0  | 0 | Not-determined | Genome-fragment | NA    | 0 |
| S1-final-viral-combined_k141_79885   | [full]   | 2466  | No | NA | 0  | 1 | Not-determined | Genome-fragment | NA    | 0 |
| S11-final-viral-combined_k141_2552   | [full]   | 1411  | No | NA | 0  | 0 | Low-quality    | Genome-fragment | 1.75  | 0 |
| S1-final-viral-combined_k141_278178  | [full]   | 2983  | No | NA | 0  | 2 | Not-determined | Genome-fragment | NA    | 0 |
| S1-final-viral-combined_k141_213333  | [full]   | 21039 | No | NA | 0  | 7 | Not-determined | Genome-fragment | NA    | 0 |
| S11-final-viral-combined_k141_39632  | [full]   | 1411  | No | NA | 0  | 0 | Low-quality    | Genome-fragment | 1.86  | 0 |
| S1-final-viral-combined_k141_146830  | [full]   | 1665  | No | NA | 0  | 1 | Not-determined | Genome-fragment | NA    | 0 |
| S1-final-viral-combined_k141_219971  | [full]   | 1411  | No | NA | 0  | 1 | Low-quality    | Genome-fragment | 2.55  | 0 |
| S17-final-viral-combined_k141_11887  | [full]   | 1411  | No | NA | 0  | 0 | Low-quality    | Genome-fragment | 2     | 0 |
| S1-final-viral-combined_k141_343426  | [full]   | 2842  | No | NA | 0  | 3 | Not-determined | Genome-fragment | NA    | 0 |
| S1-final-viral-combined_k141_295578  | [full]   | 1682  | No | NA | 0  | 1 | Not-determined | Genome-fragment | NA    | 0 |
| S12-final-viral-combined_k141_151482 | [full]   | 1411  | No | NA | 0  | 0 | Low-quality    | Genome-fragment | 3.9   | 0 |
| S12-final-viral-combined_k141_220976 | [full]   | 1411  | No | NA | 0  | 0 | Low-quality    | Genome-fragment | 2.9   | 0 |
| S12-final-viral-combined_k141_216781 | [full]   | 1411  | No | NA | 0  | 1 | Low-quality    | Genome-fragment | 0.83  | 0 |
| S1-final-viral-combined_k141_131364  | [full]   | 3594  | No | NA | 0  | 2 | Not-determined | Genome-fragment | NA    | 0 |
| S12-final-viral-combined_k141_276744 | [full]   | 1411  | No | NA | 0  | 0 | Low-quality    | Genome-fragment | 2.59  | 0 |
| S1-final-viral-combined_k141_22928   | [full]   | 1688  | No | NA | 0  | 1 | Not-determined | Genome-fragment | NA    | 0 |
| S1-final-viral-combined_k141_328545  | [full]   | 1454  | No | NA | 0  | 1 | Not-determined | Genome-fragment | NA    | 0 |
| S1-final-viral-combined_k141_64440   | [full]   | 2187  | No | NA | 0  | 3 | Not-determined | Genome-fragment | NA    | 0 |
| S1-final-viral-combined_k141_178932  | [full]   | 4991  | No | NA | 0  | 4 | Not-determined | Genome-fragment | NA    | 0 |
| S12-final-viral-combined_k141_46389  | [full]   | 1411  | No | NA | 0  | 0 | Low-quality    | Genome-fragment | 1.71  | 0 |
| S1-final-viral-combined_k141_213445  | [full]   | 1736  | No | NA | 0  | 1 | Not-determined | Genome-fragment | NA    | 0 |
| S1-final-viral-combined_k141_12526   | [full]   | 1758  | No | NA | 0  | 2 | Not-determined | Genome-fragment | NA    | 0 |
| S1-final-viral-combined_k141_377331  | [full]   | 2465  | No | NA | 0  | 2 | Not-determined | Genome-fragment | NA    | 0 |
| S12_k141_396602                      |          | 1411  | No | NA | 0  | 1 | Low-quality    | Genome-fragment | 2.4   | 0 |
| S1-final-viral-combined_k141_112235  | [full]   | 1577  | No | NA | 0  | 1 | Not-determined | Genome-fragment | NA    | 0 |
| S2-final-viral-combined_k141_12176   | [full]   | 1411  | No | NA | 0  | 0 | Low-quality    | Genome-fragment | 1.65  | 0 |
| S1-final-viral-combined_k141_361494  | [full]   | 3565  | No | NA | 0  | 3 | Not-determined | Genome-fragment | NA    | 0 |
| S2-final-viral-combined_k141_9760    | [full]   | 1411  | No | NA | 0  | 1 | Low-quality    | Genome-fragment | 1.84  | 0 |
| S1-final-viral-combined_k141_229266  | [full]   | 2127  | No | NA | 0  | 0 | Not-determined | Genome-fragment | NA    | 0 |
| S1-final-viral-combined_k141_328594  | [full]   | 1584  | No | NA | 0  | 1 | Not-determined | Genome-fragment | NA    | 0 |
| S1-final-viral-combined_k141_246266  | [full]   | 1756  | No | NA | 0  | 2 | Not-determined | Genome-fragment | NA    | 0 |
| S1-final-viral-combined_k141_178979  | [full]   | 3064  | No | NA | 0  | 2 | Not-determined | Genome-fragment | NA    | 0 |
| S1-final-viral-combined_k141_263231  | [full]   | 9244  | No | NA | 0  | 3 | Not-determined | Genome-fragment | NA    | 0 |
| S1-final-viral-combined_k141_37684   | [full]   | 1982  | No | NA | 0  | 1 | Not-determined | Genome-fragment | NA    | 0 |
| S1-final-viral-combined_k141_393095  | [full]   | 2552  | No | NA | 0  | 1 | Not-determined | Genome-fragment | NA    | 0 |
| S1-final-viral-combined_k141_213472  | [full]   | 1728  | No | NA | 0  | 2 | Not-determined | Genome-fragment | NA    | 0 |
| S1-final-viral-combined_k141_31166   | [full]   | 1633  | No | NA | 0  | 0 | Not-determined | Genome-fragment | NA    | 0 |
| S2-final-viral-combined_k141_33223   | [H2gene] | 1411  | No | NA | 1  | 0 | Low-quality    | Genome-fragment | 4.78  | 0 |
| S4_k141_157728                       |          | 1411  | No | NA | 0  | 1 | Not-determined | Genome-fragment | 2.17  | 0 |
| S1-final-viral-combined_k141_31177   | [full]   | 1327  | No | NA | 0  | 1 | Not-determined | Genome-fragment | NA    | 0 |
| S1-final-viral-combined_k141_229344  | [full]   | 5530  | No | NA | 0  | 2 | Not-determined | Genome-fragment | NA    | 0 |
| S8-final-viral-combined_k141_264340  | [full]   | 1412  | No | NA | 0  | 1 | Low-quality    | Genome-fragment | 2.93  | 0 |
| S11-final-viral-combined_k141_261877 | [full]   | 1412  | No | NA | 0  | 1 | Low-quality    | Genome-fragment | 2.37  | 0 |
| S11-final-viral-combined_k141_313222 | [full]   | 1412  | No | NA | 0  | 1 | Low-quality    | Genome-fragment | 1.92  | 0 |
| S11-final-viral-combined_k141_247574 | [full]   | 1412  | No | NA | 0  | 0 | Low-quality    | Genome-fragment | 2.19  | 0 |
| S1-final-viral-combined_k141_163070  | [full]   | 6143  | No | NA | 0  | 0 | Not-determined | Genome-fragment | NA    | 0 |
| S11-final-viral-combined_k141_48295  | [H2gene] | 1412  | No | NA | 1  | 0 | Low-quality    | Genome-fragment | 2.47  | 0 |
| S1-final-viral-combined_k141_112310  | [full]   | 1788  | No | NA | 0  | 2 | Not-determined | Genome-fragment | NA    | 0 |
| S1-final-viral-combined_k141_64588   | [full]   | 4813  | No | NA | 0  | 1 | Not-determined | Genome-fragment | NA    | 0 |
| S5-final-viral-combined_k141_10916   | [full]   | 1412  | No | NA | 2  | 0 | Low-quality    | Genome-fragment | 3.86  | 0 |
| S7-final-viral-combined_k141_5962    | [H2gene] | 1412  | No | NA | 1  | 0 | Low-quality    | Genome-fragment | 0.81  | 0 |
| S17-final-viral-combined_k141_263832 | [H2gene] | 1412  | No | NA | 1  | 0 | Low-quality    | Genome-fragment | 0.91  | 0 |
| S1-final-viral-combined_k141_14632   | [full]   | 1708  | No | NA | 0  | 2 | Low-quality    | Genome-fragment | NA    | 0 |
| S12-final-viral-combined_k141_228435 | [full]   | 1412  | No | NA | 0  | 0 | Low-quality    | Genome-fragment | 2.26  | 0 |
| S12-final-viral-combined_k141_28526  | [full]   | 1412  | No | NA | 4  | 0 | Low-quality    | Genome-fragment | 3.97  | 0 |
| S1-final-viral-combined_k141_14646   | [full]   | 2442  | No | NA | 0  | 2 | Not-determined | Genome-fragment | NA    | 0 |
| S4-final-viral-combined_k141_121890  | [H2gene] | 1412  | No | NA | 1  | 0 | Low-quality    | Genome-fragment | 3.11  | 0 |
| S1-final-viral-combined_k141_312273  | [full]   | 4589  | No | NA | 0  | 3 | Not-determined | Genome-fragment | NA    | 0 |
| S1-final-viral-combined_k141_47220   | [full]   | 2629  | No | NA | 0  | 2 | Not-determined | Genome-fragment | NA    | 0 |
| S1-final-viral-combined_k141_179105  | [full]   | 2751  | No | NA | 0  | 1 | Not-determined | Genome-fragment | NA    | 0 |
| S1-final-viral-combined_k141_377516  | [full]   | 4950  | No | NA | 0  | 4 | Not-determined | Genome-fragment | NA    | 0 |
| S4_k141_116765                       |          | 1412  | No | NA | 0  | 0 | Low-quality    | Genome-fragment | 1.93  | 0 |
| S9-final-viral-combined_k141_607     | [full]   | 1413  | No | NA | 1  | 0 | Low-quality    | Genome-fragment | 0.84  | 0 |
| S11-final-viral-combined_k141_126391 | [full]   | 1413  | No | NA | 1  | 0 | Low-quality    | Genome-fragment | 1.93  | 0 |
| S11-final-viral-combined_k141_45066  | [full]   | 1413  | No | NA | 0  | 0 | Low-quality    | Genome-fragment | 2.99  | 0 |
| S11-final-viral-combined_k141_8718   | [full]   | 1413  | No | NA | 0  | 0 | Low-quality    | Genome-fragment | 1.13  | 0 |
| S1-final-viral-combined_k141_393186  | [full]   | 1084  | No | NA | 0  | 0 | Not-determined | Genome-fragment | NA    | 0 |
| S11-final-viral-combined_k141_10579  | [full]   | 1413  | No | NA | 0  | 0 | Low-quality    | Genome-fragment | 0.99  | 0 |
| S11_k141_217532                      |          | 1413  | No | NA | 0  | 0 | Low-quality    | Genome-fragment | 33.95 | 0 |
| S1-final-viral-combined_k141_47266   | [full]   | 1802  | No | NA | 1  | 0 | Not-determined | Genome-fragment | NA    | 0 |
| S1-final-viral-combined_k141_264703  | [full]   | 1413  | No | NA | 0  | 0 | Low-quality    | Genome-fragment | 3.93  | 0 |
| S1-final-viral-combined_k141_213652  | [full]   | 1640  | No | NA | 0  | 2 | Not-determined | Genome-fragment | NA    | 0 |
| S1-final-viral-combined_k141_156495  | [full]   | 1413  | No | NA | 0  | 0 | Low-quality    | Genome-fragment | 1.04  | 0 |
| S1-final-viral-combined_k141_97901   | [full]   | 3768  | No | NA | 0  | 2 | Not-d          |                 |       |   |



|                                      |          |       |    |    |   |   |                |                 |    |       |
|--------------------------------------|----------|-------|----|----|---|---|----------------|-----------------|----|-------|
| S1-final-viral-combined_k141_134077  | [full]   | 1428  | No | NA | 0 | 1 | Not-determined | Genome-fragment | NA | 0     |
| S1-final-viral-combined_k141_157147  | [full]   | 1385  | No | NA | 0 | 1 | Not-determined | Genome-fragment | NA | 0     |
| S1-final-viral-combined_k141_181844  | [H2gene] | 1415  | No | NA | 0 | 0 | Low-quality    | Genome-fragment | NA | 2.08  |
| S1-final-viral-combined_k141_64969   | [full]   | 6637  | No | NA | 0 | 3 | Not-determined | Genome-fragment | NA | 0     |
| S5_k141_79694                        |          | 1415  | No | NA | 0 | 0 | Low-quality    | Genome-fragment | NA | 5.63  |
| S1-final-viral-combined_k141_348381  | [full]   | 10144 | No | NA | 0 | 6 | Not-determined | Genome-fragment | NA | 0     |
| S7-final-viral-combined_k141_155719  | [full]   | 1415  | No | NA | 1 | 0 | Low-quality    | Genome-fragment | NA | 3.43  |
| S17-final-viral-combined_k141_188874 | [H2gene] | 1415  | No | NA | 0 | 0 | Low-quality    | Genome-fragment | NA | 3.45  |
| S1-final-viral-combined_k141_177814  | [full]   | 1669  | No | NA | 0 | 1 | Not-determined | Genome-fragment | NA | 0     |
| S1-final-viral-combined_k141_163363  | [full]   | 1845  | No | NA | 0 | 0 | Not-determined | Genome-fragment | NA | 0     |
| S12-final-viral-combined_k141_151066 | [full]   | 1415  | No | NA | 1 | 0 | Low-quality    | Genome-fragment | NA | 4.16  |
| S1-final-viral-combined_k141_157401  | [full]   | 15337 | No | NA | 4 | 1 | Medium-quality | Genome-fragment | NA | 76.98 |
| S12-final-viral-combined_k141_347551 | [full]   | 1415  | No | NA | 0 | 2 | Low-quality    | Genome-fragment | NA | 1.33  |
| S2-final-viral-combined_k141_197665  | [full]   | 1415  | No | NA | 0 | 0 | Low-quality    | Genome-fragment | NA | 2.44  |
| S2-final-viral-combined_k141_296047  | [full]   | 2583  | No | NA | 0 | 0 | Not-determined | Genome-fragment | NA | 0     |
| S2-final-viral-combined_k141_127633  | [full]   | 1415  | No | NA | 0 | 1 | Low-quality    | Genome-fragment | NA | 3.23  |
| S1-final-viral-combined_k141_179395  | [full]   | 1544  | No | NA | 0 | 1 | Not-determined | Genome-fragment | NA | 0     |
| S4_k141_130909                       |          | 1415  | No | NA | 0 | 0 | Low-quality    | Genome-fragment | NA | 3.59  |
| S1-final-viral-combined_k141_163388  | [full]   | 2156  | No | NA | 0 | 2 | Not-determined | Genome-fragment | NA | 0     |
| S1-final-viral-combined_k141_361829  | [full]   | 6103  | No | NA | 0 | 0 | Not-determined | Genome-fragment | NA | 0     |
| S9-final-viral-combined_k141_181441  | [full]   | 1416  | No | NA | 0 | 0 | Low-quality    | Genome-fragment | NA | 2.77  |
| S11-final-viral-combined_k141_221651 | [full]   | 1416  | No | NA | 0 | 1 | Low-quality    | Genome-fragment | NA | 1.65  |
| S11-final-viral-combined_k141_227464 | [full]   | 1416  | No | NA | 1 | 0 | Low-quality    | Genome-fragment | NA | 2.38  |
| S1-final-viral-combined_k141_163434  | [full]   | 1415  | No | NA | 0 | 1 | Not-determined | Genome-fragment | NA | 0     |
| S1-final-viral-combined_k141_147332  | [full]   | 1690  | No | NA | 0 | 1 | Not-determined | Genome-fragment | NA | 0     |
| S1_k141_197599                       |          | 1416  | No | NA | 0 | 1 | Low-quality    | Genome-fragment | NA | 2.39  |
| S3-final-viral-combined_k141_59119   | [full]   | 1416  | No | NA | 0 | 0 | Low-quality    | Genome-fragment | NA | 1.13  |
| S1-final-viral-combined_k141_158271  | [full]   | 2315  | No | NA | 0 | 1 | Not-determined | Genome-fragment | NA | 0     |
| S1-final-viral-combined_k141_177941  | [full]   | 1493  | No | NA | 0 | 1 | Not-determined | Genome-fragment | NA | 0     |
| S1-final-viral-combined_k141_47549   | [full]   | 1457  | No | NA | 0 | 0 | Not-determined | Genome-fragment | NA | 0     |
| S12-final-viral-combined_k141_136425 | [full]   | 1416  | No | NA | 0 | 1 | Low-quality    | Genome-fragment | NA | 1.22  |
| S4_k141_99721                        |          | 1416  | No | NA | 0 | 2 | Low-quality    | Genome-fragment | NA | 0.34  |
| S6-final-viral-combined_k141_136388  | [full]   | 1416  | No | NA | 0 | 1 | Low-quality    | Genome-fragment | NA | 3.02  |
| S1-final-viral-combined_k141_278676  | [full]   | 4967  | No | NA | 0 | 0 | Not-determined | Genome-fragment | NA | 0     |
| S8_k141_22894                        |          | 1416  | No | NA | 0 | 0 | Low-quality    | Genome-fragment | NA | 2.69  |
| S1-final-viral-combined_k141_361884  | [full]   | 5842  | No | NA | 0 | 2 | Not-determined | Genome-fragment | NA | 0     |
| S1-final-viral-combined_k141_131461  | [full]   | 6984  | No | NA | 0 | 5 | Not-determined | Genome-fragment | NA | 0     |
| S11-final-viral-combined_k141_240644 | [H2gene] | 1417  | No | NA | 2 | 0 | Low-quality    | Genome-fragment | NA | 2.2   |
| S11_k141_273849                      |          | 1417  | No | NA | 0 | 0 | Low-quality    | Genome-fragment | NA | 0.92  |
| S1-final-viral-combined_k141_19104   | [full]   | 1417  | No | NA | 0 | 0 | Low-quality    | Genome-fragment | NA | 2.98  |
| S1-final-viral-combined_k141_19507   | [full]   | 1417  | No | NA | 0 | 1 | Low-quality    | Genome-fragment | NA | 4.04  |
| S1-final-viral-combined_k141_112640  | [full]   | 2902  | No | NA | 0 | 3 | Not-determined | Genome-fragment | NA | 0     |
| S1-final-viral-combined_k141_163526  | [full]   | 2018  | No | NA | 0 | 0 | Not-determined | Genome-fragment | NA | 0     |
| S5-final-viral-combined_k141_155366  | [full]   | 1417  | No | NA | 0 | 2 | Low-quality    | Genome-fragment | NA | 2.87  |
| S5-final-viral-combined_k141_24199   | [full]   | 1417  | No | NA | 0 | 2 | Low-quality    | Genome-fragment | NA | 1.16  |
| S1-final-viral-combined_k141_131487  | [full]   | 2413  | No | NA | 0 | 2 | Not-determined | Genome-fragment | NA | 0     |
| S17-final-viral-combined_k141_230847 | [full]   | 1417  | No | NA | 1 | 0 | Low-quality    | Genome-fragment | NA | 2.1   |
| S2-final-viral-combined_k141_115757  | [full]   | 1417  | No | NA | 0 | 1 | Low-quality    | Genome-fragment | NA | 3.09  |
| S11-final-viral-combined_k141_138733 | [H2gene] | 1418  | No | NA | 0 | 1 | Low-quality    | Genome-fragment | NA | 0     |
| S1-final-viral-combined_k141_15947   | [full]   | 1432  | No | NA | 0 | 0 | Not-determined | Genome-fragment | NA | 0     |
| S11_k141_257500                      |          | 1418  | No | NA | 0 | 1 | Low-quality    | Genome-fragment | NA | 0.4   |
| S1-final-viral-combined_k141_155951  | [full]   | 1418  | No | NA | 0 | 0 | Low-quality    | Genome-fragment | NA | 2.26  |
| S1-final-viral-combined_k141_278812  | [full]   | 5625  | No | NA | 0 | 2 | Not-determined | Genome-fragment | NA | 0     |
| S1-final-viral-combined_k141_178018  | [full]   | 2935  | No | NA | 0 | 3 | Not-determined | Genome-fragment | NA | 0     |
| S1-final-viral-combined_k141_246680  | [full]   | 3237  | No | NA | 0 | 0 | Not-determined | Genome-fragment | NA | 0     |
| S3-final-viral-combined_k141_100413  | [H2gene] | 1418  | No | NA | 1 | 0 | Low-quality    | Genome-fragment | NA | 3.21  |
| S1-final-viral-combined_k141_278831  | [full]   | 2926  | No | NA | 0 | 1 | Not-determined | Genome-fragment | NA | 0     |
| S17-final-viral-combined_k141_203383 | [full]   | 1418  | No | NA | 0 | 1 | Low-quality    | Genome-fragment | NA | 0.54  |
| S1-final-viral-combined_k141_246694  | [full]   | 1045  | No | NA | 0 | 5 | Not-determined | Genome-fragment | NA | 0     |
| S1-final-viral-combined_k141_163625  | [full]   | 1814  | No | NA | 0 | 1 | Not-determined | Genome-fragment | NA | 0     |
| S1-final-viral-combined_k141_393651  | [full]   | 3295  | No | NA | 0 | 2 | Not-determined | Genome-fragment | NA | 0     |
| S1-final-viral-combined_k141_477451  | [full]   | 1241  | No | NA | 0 | 2 | Not-determined | Genome-fragment | NA | 0     |
| S1-final-viral-combined_k141_112803  | [full]   | 2216  | No | NA | 0 | 0 | Not-determined | Genome-fragment | NA | 0     |
| S1-final-viral-combined_k141_147553  | [full]   | 2070  | No | NA | 0 | 2 | Not-determined | Genome-fragment | NA | 0     |
| S17-final-viral-combined_k141_179834 | [full]   | 1418  | No | NA | 0 | 0 | Low-quality    | Genome-fragment | NA | 1.4   |
| S1-final-viral-combined_k141_147557  | [full]   | 1515  | No | NA | 0 | 1 | Not-determined | Genome-fragment | NA | 0     |
| S1-final-viral-combined_k141_344130  | [full]   | 4503  | No | NA | 0 | 2 | Not-determined | Genome-fragment | NA | 0     |
| S17_k141_21015                       |          | 1418  | No | NA | 0 | 0 | Low-quality    | Genome-fragment | NA | 2.54  |
| S1-final-viral-combined_k141_112833  | [full]   | 3460  | No | NA | 0 | 0 | Not-determined | Genome-fragment | NA | 0     |
| S1-final-viral-combined_k141_278877  | [full]   | 1488  | No | NA | 0 | 0 | Not-determined | Genome-fragment | NA | 0     |
| S1-final-viral-combined_k141_163677  | [full]   | 1944  | No | NA | 0 | 1 | Not-determined | Genome-fragment | NA | 0     |
| S1-final-viral-combined_k141_229765  | [full]   | 1745  | No | NA | 0 | 2 | Not-determined | Genome-fragment | NA | 0     |
| S12-final-viral-combined_k141_355952 | [full]   | 1418  | No | NA | 0 | 1 | Low-quality    | Genome-fragment | NA | 0.72  |
| S1-final-viral-combined_k141_393880  | [full]   | 2520  | No | NA | 0 | 3 | Not-determined | Genome-fragment | NA | 0     |
| S12-final-viral-combined_k141_164781 | [full]   | 1418  | No | NA | 0 | 2 | Low-quality    | Genome-fragment | NA | 0.77  |
| S1-final-viral-combined_k141_393733  | [full]   | 1566  | No | NA | 0 | 1 | Not-determined | Genome-fragment | NA | 0     |
| S12_k141_153770                      |          | 1418  | No | NA | 0 | 1 | Low-quality    | Genome-fragment | NA | 1.01  |
| S2_k141_150337                       |          | 1418  | No | NA | 0 | 2 | Low-quality    | Genome-fragment | NA | 2.8   |
| S1-final-viral-combined_k141_112909  | [full]   | 8288  | No | NA | 0 | 3 | Not-determined | Genome-fragment | NA | 0     |
| S4_k141_134795                       |          | 1418  | No | NA | 0 | 0 | Low-quality    | Genome-fragment | NA | 3.9   |
| S4_k141_3573                         |          | 1418  | No | NA | 0 | 0 | Low-quality    | Genome-fragment | NA | 3.66  |
| S4_k141_56215                        |          | 1418  | No | NA | 0 | 1 | Low-quality    | Genome-fragment | NA | 1.72  |
| S1-final-viral-combined_k141_65340   | [full]   | 2116  | No | NA | 0 | 2 | Not-determined | Genome-fragment | NA | 0     |
| S1-final-viral-combined_k141_112929  | [full]   | 1558  | No | NA | 0 | 1 | Not-determined | Genome-fragment | NA | 0     |
| S1-final-viral-combined_k141_239959  | [full]   | 2572  | No | NA | 0 | 2 | Not-determined | Genome-fragment | NA | 0     |
| S9-final-viral-combined_k141_116329  | [full]   | 1419  | No | NA | 0 | 1 | Low-quality    | Genome-fragment | NA | 2.26  |
| S9_k141_106044                       |          | 1419  | No | NA | 0 | 1 | Low-quality    | Genome-fragment | NA | 3.28  |
| S11-final-viral-combined_k141_65485  | [full]   | 1419  | No | NA | 0 | 1 | Low-quality    | Genome-fragment | NA | 1.08  |
| S1-final-viral-combined_k141_161341  | [full]   | 1417  | No | NA | 0 | 0 | Not-determined | Genome-fragment | NA | 0     |
| S1-final-viral-combined_k141_344339  | [full]   | 1223  | No | NA | 0 | 0 | Not-determined | Genome-fragment | NA | 0     |
| S1-final-viral-combined_k141_112967  | [full]   | 2238  | No | NA | 0 | 4 | Not-determined | Genome-fragment | NA | 0     |
| S5-final-viral-combined_k141_292515  | [full]   | 1419  | No | NA | 0 | 1 | Low-quality    | Genome-fragment | NA | 2.34  |
| S1-final-viral-combined_k141_47967   | [full]   | 1727  | No | NA | 2 | 0 | Not-determined | Genome-fragment | NA | 0     |
| S1-final-viral-combined_k141_161751  | [full]   | 3217  | No | NA | 0 | 2 | Not-determined | Genome-fragment | NA | 0     |
| S17-final-viral-combined_k141_27209  | [full]   | 1419  | No | NA | 0 | 0 | Low-quality    | Genome-fragment | NA | 0.69  |
| S17_k141_258737                      |          | 1419  | No | NA | 1 | 0 | Low-quality    | Genome-fragment | NA | 1.87  |
| S1-final-viral-combined_k141_393855  | [full]   | 5875  | No | NA | 0 | 2 | Not-determined | Genome-fragment | NA | 0     |
| S6-final-viral-combined_k141_163946  | [full]   | 1419  | No | NA | 0 | 0 | Low-quality    | Genome-fragment | NA | 2.79  |
| S6-final-viral-combined_k141_104907  | [full]   | 1419  | No | NA | 0 | 0 | Low-quality    | Genome-fragment | NA | 3.11  |
| S1-final-viral-combined_k141_81266   | [full]   | 3600  | No | NA | 0 | 2 | Not-determined | Genome-fragment | NA | 0     |
| S1-final-viral-combined_k141_393889  | [full]   | 3128  | No | NA | 0 | 2 | Not-determined | Genome-fragment | NA | 0     |
| S9-final-viral-combined_k141_121486  | [full]   | 1420  | No | NA | 0 | 0 | Low-quality    | Genome-fragment | NA | 3.02  |
| S1-final-viral-combined_k141_230006  | [full]   | 2257  | No | NA | 0 | 1 | Not-determined | Genome-fragment | NA | 0     |
| S11-final-viral-combined_k141_83043  | [full]   | 1420  | No | NA | 2 | 0 | Low-quality    | Genome-fragment | NA | 3.06  |
| S1-final-viral-combined_k141_393931  | [full]   | 3184  | No | NA | 0 | 2 | Not-determined | Genome-fragment | NA | 0     |
| S11-final-viral-combined_k141_79313  | [full]   | 1420  | No | NA | 0 | 0 | Low-quality    | Genome-fragment | NA | 1.26  |
| S1-final-viral-combined_k141_300391  | [full]   | 1420  | No | NA | 1 | 0 | Low-quality    | Genome-fragment | NA | 2.93  |
| S1-final-viral-combined_k141_38643   | [full]   | 5851  | No | NA | 0 | 1 | Not-determined | Genome-fragment | NA | 2.4   |
| S1-final-viral-combined_k141_356848  | [full]   | 1420  | No | NA | 0 | 0 | Low-quality    | Genome-fragment | NA | 3.76  |
| S1-final-viral-combined_k141_53379   | [H2gene] | 1420  | No | NA | 2 | 0 | Low-quality    | Genome-fragment | NA | 2.19  |
| S7-final-viral-combined_k141_177496  | [full]   | 1420  | No | NA | 1 | 0 | Low-quality    | Genome-fragment | NA | 0     |
| S1-final-viral-combined_k141_244487  | [full]   | 1421  | No | NA | 0 | 1 | Not-determined | Genome-fragment | NA | 0     |
| S1-final-viral-combined_k141_88669   | [full]   | 1048  | No | NA | 0 | 0 | Not-determined | Genome-fragment | NA | 0     |
| S7_k141_59063                        |          | 1420  | No | NA | 0 | 0 | Low-quality    | Genome-fragment | NA | 3.45  |
| S17-final-viral-combined_k141_28196  | [full]   | 1420  | No | NA | 0 | 0 | Low-quality    | Genome-fragment | NA | 4.01  |
| S1-final-viral-combined_k141_344538  | [full]   | 5812  | No | NA | 0 | 2 | Not-determined | Genome-fragment | NA | 0     |
| S1-final-viral-combined_k141_65577   | [full]   | 2304  | No | NA | 0 | 2 | Not-determined | Genome-fragment | NA | 0     |
| S1-final-viral-combined_k141_230312  | [full]   | 2050  | No | NA | 0 | 0 | Not-determined | Genome-fragment | NA | 0     |
| S1-final-viral-combined_k141_38682   | [full]   | 1334  | No | NA | 0 | 0 | Not-determined | Genome-fragment | NA | 0     |
| S1-final-viral-combined_k141_344559  | [full]   | 10060 | No | NA | 0 | 1 | Not-determined | Genome-fragment | NA | 0     |
| S1-final-viral-combined_k141_394041  | [full]   | 1624  | No | NA | 0 | 1 | Not-determined | Genome-fragment | NA | 0     |
| S2_k141_89373                        |          | 1420  | No | NA | 0 | 0 | Low-quality    | Genome-fragment | NA | 2.83  |
| S1-final-viral-combined_k141_147807  | [full]   | 6130  | No | NA | 0 | 5 | Not-determined | Genome-fragment | NA | 0     |
| S1-final-viral-combined_k141_163838  | [full]   | 5343  | No | NA | 0 | 3 | Not-determined | Genome-fragment | NA | 0     |
| S1-final-viral-combined_k141_163401  | [full]   | 1419  | No | NA | 0 | 0 | Not-determined | Genome-fragment | NA | 0     |
| S1-final-viral-combined_k141_65587   | [full]   | 1537  | No | NA | 0 | 1 | Not-determined | Genome-fragment | NA | 0     |
| S8-final-viral-combined_k141_250821  | [full]   | 1420  | No | NA | 0 | 1 | Low-quality    | Genome-fragment | NA | 3.98  |
| S1-final-viral-combined_k141_21984   | [full]   | 1592  | No | NA | 0 | 0 | Not-determined | Genome-fragment | NA | 0     |
| S1-final-viral-combined_k141_16347   | [full]   | 2347  | No | NA | 0 | 0 | Not-determined | Genome-fragment | NA | 0     |
| S11-final-viral-combined_k141_117611 | [full]   | 1421  | No | NA | 1 | 0 | Low-quality    | Genome-fragment | NA | 3.1   |
| S1-final-viral-combined_k141_23039</ |          |       |    |    |   |   |                |                 |    |       |



|                                      |             |       |     |     |       |    |                   |                 |    |       |       |
|--------------------------------------|-------------|-------|-----|-----|-------|----|-------------------|-----------------|----|-------|-------|
| S1-final-viral-combined_k141_180603  | [full]      | 2608  | No  | NA  | 0     | 0  | Not-determined    | Genome-fragment | NA | 0     | 0     |
| S2-final-viral-combined_k141_191701  | [full]      | 1422  | No  | NA  | 0     | 0  | 1 Low-quality     | Genome-fragment | NA | 1.89  | 0     |
| S1-final-viral-combined_k141_32497   | [full]      | 2082  | No  | NA  | 0     | 0  | 1 Not-determined  | Genome-fragment | NA | 0     | 0     |
| S1-final-viral-combined_k141_48530   | [full]      | 1964  | No  | NA  | 0     | 0  | 0 Not-determined  | Genome-fragment | NA | 0     | 0     |
| S4-final-viral-combined_k141_15020   | [full]      | 1422  | Yes | 750 | 1     | 1  | 1 Low-quality     | Genome-fragment | NA | 1.06  | 47.26 |
| S9_k141_33953                        |             | 1423  | No  | NA  | 0     | 0  | 0 Low-quality     | Genome-fragment | NA | 2.38  | 0     |
| S5-final-viral-combined_k141_129375  | [full]      | 1423  | No  | NA  | 0     | 0  | 2 Low-quality     | Genome-fragment | NA | 0.4   | 0     |
| S5-final-viral-combined_k141_104587  | [full]      | 1423  | No  | NA  | 0     | 0  | 0 Low-quality     | Genome-fragment | NA | 2.05  | 0     |
| S7_k141_145339                       |             | 1423  | No  | NA  | 0     | 0  | 0 Low-quality     | Genome-fragment | NA | 3.1   | 0     |
| S1-final-viral-combined_k141_32547   | [full]      | 1576  | No  | NA  | 0     | 0  | 0 Not-determined  | Genome-fragment | NA | 0     | 0     |
| S1-final-viral-combined_k141_345112  | [full]      | 1311  | No  | NA  | 0     | 0  | 0 Not-determined  | Genome-fragment | NA | 0     | 0     |
| S1-final-viral-combined_k141_164465  | [full]      | 5584  | No  | NA  | 0     | 0  | 3 Not-determined  | Genome-fragment | NA | 0     | 0     |
| S1-final-viral-combined_k141_164439  | [full]      | 2106  | No  | NA  | 0     | 0  | 1 Not-determined  | Genome-fragment | NA | 0     | 0     |
| S17-final-viral-combined_k141_84431  | [full]      | 1423  | No  | NA  | 2     | 0  | 0 Low-quality     | Genome-fragment | NA | 3.52  | 0     |
| S1-final-viral-combined_k141_164485  | [full]      | 13714 | No  | NA  | 1     | 2  | 2 Medium-quality  | Genome-fragment | NA | 89.89 | 0     |
| S1-final-viral-combined_k141_48676   | [full]      | 1155  | No  | NA  | 0     | 0  | 1 Low-quality     | Genome-fragment | NA | 2.38  | 0     |
| S17-final-viral-combined_k141_230826 | [full]      | 1423  | No  | NA  | 1     | 0  | 0 Low-quality     | Genome-fragment | NA | 2.18  | 0     |
| S12-final-viral-combined_k141_140064 | [full]      | 1423  | No  | NA  | 0     | 0  | 0 Low-quality     | Genome-fragment | NA | 2.17  | 0     |
| S5-final-viral-combined_k141_279511  | [full]      | 1716  | No  | NA  | 0     | 0  | 1 Not-determined  | Genome-fragment | NA | 0     | 0     |
| S1-final-viral-combined_k141_180779  | [full]      | 1388  | No  | NA  | 0     | 0  | 0 Not-determined  | Genome-fragment | NA | 0     | 0     |
| S1-final-viral-combined_k141_180781  | [full]      | 1442  | No  | NA  | 0     | 0  | 0 Not-determined  | Genome-fragment | NA | 0     | 0     |
| S2-final-viral-combined_k141_230251  | [full]      | 1423  | No  | NA  | 0     | 0  | 0 Low-quality     | Genome-fragment | NA | 3.71  | 0     |
| S1-final-viral-combined_k141_345168  | [full]      | 1677  | No  | NA  | 0     | 0  | 1 Not-determined  | Genome-fragment | NA | 0     | 0     |
| S1-final-viral-combined_k141_32738   | [full]      | 3179  | No  | NA  | 0     | 0  | 3 Not-determined  | Genome-fragment | NA | 0     | 0     |
| S1-final-viral-combined_k141_180806  | [full]      | 2038  | No  | NA  | 0     | 0  | 1 Not-determined  | Genome-fragment | NA | 0     | 0     |
| S1-final-viral-combined_k141_180807  | [full]      | 2327  | No  | NA  | 0     | 0  | 0 Not-determined  | Genome-fragment | NA | 0     | 0     |
| S1-final-viral-combined_k141_345238  | [full]      | 7040  | No  | NA  | 0     | 0  | 2 Not-determined  | Genome-fragment | NA | 0     | 0     |
| S2-final-viral-combined_k141_122264  | [full]      | 1423  | No  | NA  | 0     | 0  | 0 Low-quality     | Genome-fragment | NA | 0.94  | 0     |
| S1-final-viral-combined_k141_345249  | [full]      | 2666  | No  | NA  | 0     | 0  | 0 Not-determined  | Genome-fragment | NA | 0     | 0     |
| S1-final-viral-combined_k141_82151   | [full]      | 2117  | No  | NA  | 0     | 0  | 2 Not-determined  | Genome-fragment | NA | 0     | 0     |
| S1-final-viral-combined_k141_48809   | [full]      | 2078  | No  | NA  | 0     | 0  | 3 Not-determined  | Genome-fragment | NA | 0     | 0     |
| S2_k141_23862                        |             | 1423  | No  | NA  | 0     | 0  | 0 Low-quality     | Genome-fragment | NA | 3.67  | 0     |
| S1-final-viral-combined_k141_114145  | [full]      | 2105  | No  | NA  | 0     | 0  | 2 Not-determined  | Genome-fragment | NA | 0     | 0     |
| S1-final-viral-combined_k141_82187   | [full]      | 2508  | No  | NA  | 0     | 0  | 0 Not-determined  | Genome-fragment | NA | 0     | 0     |
| S2_k141_143884                       |             | 1423  | No  | NA  | 0     | 0  | 1 Low-quality     | Genome-fragment | NA | 0.86  | 0     |
| S1-final-viral-combined_k141_345325  | [full]      | 2041  | No  | NA  | 0     | 0  | 0 Not-determined  | Genome-fragment | NA | 0     | 0     |
| S1-final-viral-combined_k141_82205   | [full]      | 1118  | No  | NA  | 0     | 0  | 1 Not-determined  | Genome-fragment | NA | 0     | 0     |
| S1-final-viral-combined_k141_48883   | [full]      | 9453  | No  | NA  | 0     | 0  | 7 Not-determined  | Genome-fragment | NA | 0     | 0     |
| S1-final-viral-combined_k141_345351  | [full]      | 3352  | No  | NA  | 0     | 0  | 2 Not-determined  | Genome-fragment | NA | 0     | 0     |
| S1-final-viral-combined_k141_345383  | [full]      | 1542  | No  | NA  | 0     | 0  | 1 Not-determined  | Genome-fragment | NA | 0     | 0     |
| S4-final-viral-combined_k141_10245   | [full]      | 1423  | No  | NA  | 0     | 0  | 0 Low-quality     | Genome-fragment | NA | 1.87  | 0     |
| S1-final-viral-combined_k141_23863   | [full]      | 15902 | No  | NA  | 0     | 0  | 10 Medium-quality | Genome-fragment | NA | 50.78 | 0     |
| S1-final-viral-combined_k141_48966   | [full]      | 3073  | No  | NA  | 0     | 0  | 1 Not-determined  | Genome-fragment | NA | 0     | 0     |
| S1-final-viral-combined_k141_32868   | [full]      | 6744  | No  | NA  | 0     | 0  | 5 Not-determined  | Genome-fragment | NA | 0     | 0     |
| S1-final-viral-combined_k141_114282  | [full]      | 2133  | No  | NA  | 0     | 0  | 2 Not-determined  | Genome-fragment | NA | 0     | 0     |
| S1-final-viral-combined_k141_345404  | [full]      | 1314  | No  | NA  | 0     | 0  | 0 Not-determined  | Genome-fragment | NA | 0     | 0     |
| S1-final-viral-combined_k141_345429  | [full]      | 1091  | No  | NA  | 0     | 0  | 0 Not-determined  | Genome-fragment | NA | 0     | 0     |
| S8-final-viral-combined_k141_246658  | [full]      | 1423  | No  | NA  | 0     | 0  | 1 Low-quality     | Genome-fragment | NA | 2.18  | 0     |
| S1-final-viral-combined_k141_32883   | [full]      | 3720  | No  | NA  | 0     | 0  | 0 Not-determined  | Genome-fragment | NA | 0     | 0     |
| S1-final-viral-combined_k141_114382  | [full]      | 1539  | No  | NA  | 0     | 0  | 1 Not-determined  | Genome-fragment | NA | 0     | 0     |
| S1-final-viral-combined_k141_114474  | [full]      | 2678  | No  | NA  | 0     | 0  | 2 Not-determined  | Genome-fragment | NA | 0     | 0     |
| S9-final-viral-combined_k141_754548  | [full]      | 1424  | No  | NA  | 0     | 0  | 0 Low-quality     | Genome-fragment | NA | 0.54  | 0     |
| S9-final-viral-combined_k141_56527   | [full]      | 1424  | No  | NA  | 1     | 0  | 0 Low-quality     | Genome-fragment | NA | 3.16  | 0     |
| S9_k141_32613                        |             | 1424  | No  | NA  | 0     | 0  | 0 Low-quality     | Genome-fragment | NA | 2.38  | 0     |
| S9_k141_21954                        |             | 1424  | No  | NA  | 0     | 0  | 1 Low-quality     | Genome-fragment | NA | 3.35  | 0     |
| S1-final-viral-combined_k141_49249   | [full]      | 2946  | No  | NA  | 0     | 0  | 3 Not-determined  | Genome-fragment | NA | 0     | 0     |
| S11-final-viral-combined_k141_195610 | [full]      | 1424  | No  | NA  | 1     | 0  | 0 Low-quality     | Genome-fragment | NA | 1.03  | 0     |
| S1-final-viral-combined_k141_49284   | [full]      | 2005  | No  | NA  | 0     | 0  | 1 Not-determined  | Genome-fragment | NA | 0     | 0     |
| S1-final-viral-combined_k141_284667  | [full]      | 1424  | No  | NA  | 0     | 0  | 1 Low-quality     | Genome-fragment | NA | 2.21  | 0     |
| S5_k141_85022                        |             | 1424  | No  | NA  | 1     | 0  | 0 Low-quality     | Genome-fragment | NA | 3.26  | 0     |
| S17-final-viral-combined_k141_47580  | [full]      | 1424  | No  | NA  | 0     | 0  | 1 Low-quality     | Genome-fragment | NA | 0.71  | 0     |
| S12-final-viral-combined_k141_188626 | [full]      | 1424  | No  | NA  | 0     | 0  | 0 Low-quality     | Genome-fragment | NA | 3.19  | 0     |
| S1-final-viral-combined_k141_114978  | [full]      | 2619  | No  | NA  | 0     | 0  | 3 Not-determined  | Genome-fragment | NA | 0     | 0     |
| S1-final-viral-combined_k141_115088  | [full]      | 3609  | No  | NA  | 0     | 0  | 1 Not-determined  | Genome-fragment | NA | 0     | 0     |
| S1-final-viral-combined_k141_115100  | [full]      | 1284  | No  | NA  | 0     | 0  | 2 Not-determined  | Genome-fragment | NA | 0     | 0     |
| S2-final-viral-combined_k141_238421  | [full]      | 1424  | No  | NA  | 0     | 0  | 2 Low-quality     | Genome-fragment | NA | 0.75  | 0     |
| S9-final-viral-combined_k141_89585   | [full]      | 1425  | No  | NA  | 0     | 0  | 0 Low-quality     | Genome-fragment | NA | 0.8   | 0     |
| S1-final-viral-combined_k141_34468   | [full]      | 1425  | No  | NA  | 0     | 0  | 0 Low-quality     | Genome-fragment | NA | 3.78  | 0     |
| S1-final-viral-combined_k141_125241  | [full]      | 1425  | No  | NA  | 0     | 0  | 0 Low-quality     | Genome-fragment | NA | 2.22  | 0     |
| S1-final-viral-combined_k141_2551    | [0_partial] | 17087 | No  | NA  | 0     | 10 | 10 Not-determined | Genome-fragment | NA | 0     | 0     |
| S3-final-viral-combined_k141_85139   | [1 2gene]   | 1425  | No  | NA  | 1     | 0  | 0 Low-quality     | Genome-fragment | NA | 2.08  | 0     |
| S7-final-viral-combined_k141_128011  | [1 2gene]   | 1425  | No  | NA  | 1     | 0  | 0 Low-quality     | Genome-fragment | NA | 1.34  | 0     |
| S7_k141_17556                        |             | 1425  | No  | NA  | 0     | 0  | 0 Low-quality     | Genome-fragment | NA | 1.76  | 0     |
| S1-final-viral-combined_k141_331544  | [0_partial] | 26230 | Yes | NA  | 14540 | 7  | 8 Complete        | High-quality    | NA | 0     | 44.57 |
| S7_k141_50291                        |             | 1425  | No  | NA  | 0     | 0  | 0 Low-quality     | Genome-fragment | NA | 3.23  | 0     |
| S1-final-viral-combined_k141_68332   | [0_partial] | 12047 | No  | NA  | 0     | 0  | 7 Not-determined  | Genome-fragment | NA | 0     | 0     |
| S1-final-viral-combined_k141_265860  | [0_partial] | 23566 | No  | NA  | 0     | 0  | 13 Not-determined | Genome-fragment | NA | 0     | 0     |
| S1-final-viral-combined_k141_85225   | [0_partial] | 67554 | Yes | NA  | 41415 | 21 | 20 High-quality   | High-quality    | NA | 100   | 38.69 |
| S17-final-viral-combined_k141_218604 | [full]      | 1425  | No  | NA  | 2     | 0  | 2 Low-quality     | Genome-fragment | NA | 2.5   | 0     |
| S1-final-viral-combined_k141_36134   | [0_partial] | 10668 | No  | NA  | 0     | 0  | 9 Not-determined  | Genome-fragment | NA | 0     | 0     |
| S12-final-viral-combined_k141_243470 | [full]      | 1425  | No  | NA  | 0     | 0  | 0 Low-quality     | Genome-fragment | NA | 3.44  | 0     |
| S2-final-viral-combined_k141_47288   | [full]      | 1425  | No  | NA  | 0     | 0  | 0 Low-quality     | Genome-fragment | NA | 23.23 | 0     |
| S1-final-viral-combined_k141_136097  | [0_partial] | 19804 | No  | NA  | 1     | 6  | 6 Medium-quality  | Genome-fragment | NA | 50.57 | 0     |
| S1-final-viral-combined_k141_168463  | [0_partial] | 23512 | No  | NA  | 0     | 7  | 7 Not-determined  | Genome-fragment | NA | 0     | 0     |
| S1-final-viral-combined_k141_28478   | [0_partial] | 14860 | No  | NA  | 0     | 8  | 8 Not-determined  | Genome-fragment | NA | 0     | 0     |
| S2-final-viral-combined_k141_144466  | [1 2gene]   | 1425  | No  | NA  | 0     | 0  | 0 Low-quality     | Genome-fragment | NA | 2.98  | 0     |
| S1-final-viral-combined_k141_169272  | [0_partial] | 12125 | No  | NA  | 0     | 12 | 12 Not-determined | Genome-fragment | NA | 0     | 0     |
| S2-final-viral-combined_k141_121278  | [0_partial] | 11574 | No  | NA  | 0     | 9  | 9 Not-determined  | Genome-fragment | NA | 0     | 0     |
| S4-final-viral-combined_k141_104761  | [full]      | 1425  | No  | NA  | 0     | 0  | 0 Low-quality     | Genome-fragment | NA | 1.13  | 0     |
| S8-final-viral-combined_k141_10996   | [full]      | 1425  | No  | NA  | 0     | 0  | 0 Low-quality     | Genome-fragment | NA | 2.6   | 0     |
| S9-final-viral-combined_k141_31942   | [1 2gene]   | 1426  | No  | NA  | 0     | 0  | 0 Low-quality     | Genome-fragment | NA | 3.34  | 0     |
| S11-final-viral-combined_k141_255982 | [1 2gene]   | 1426  | No  | NA  | 2     | 0  | 0 Low-quality     | Genome-fragment | NA | 1.34  | 0     |
| S1-final-viral-combined_k141_138958  | [0_partial] | 13426 | No  | NA  | 0     | 10 | 10 Not-determined | Genome-fragment | NA | 0     | 0     |
| S1-final-viral-combined_k141_255289  | [1_partial] | 11584 | No  | NA  | 0     | 5  | 5 Not-determined  | Genome-fragment | NA | 0     | 0     |
| S11_k141_165217                      |             | 1426  | No  | NA  | 0     | 0  | 0 Low-quality     | Genome-fragment | NA | 2.86  | 0     |
| S1-final-viral-combined_k141_155743  | [0_partial] | 15180 | No  | NA  | 0     | 0  | 11 Not-determined | Genome-fragment | NA | 0     | 0     |
| S7-final-viral-combined_k141_86098   | [full]      | 1426  | No  | NA  | 0     | 0  | 0 Low-quality     | Genome-fragment | NA | 2.45  | 0     |
| S1-final-viral-combined_k141_278032  | [0_partial] | 28053 | No  | NA  | 0     | 0  | 18 Not-determined | Genome-fragment | NA | 0     | 0     |
| S1-final-viral-combined_k141_307231  | [0_partial] | 70097 | Yes | NA  | 33763 | 1  | 10 Medium-quality | Genome-fragment | NA | 88.54 | 51.83 |
| S17-final-viral-combined_k141_70831  | [full]      | 1426  | No  | NA  | 0     | 0  | 0 Low-quality     | Genome-fragment | NA | 3.05  | 0     |
| S17_k141_49920                       |             | 1426  | No  | NA  | 0     | 0  | 1 Low-quality     | Genome-fragment | NA | 4.02  | 0     |
| S1-final-viral-combined_k141_126034  | [0_partial] | 18208 | No  | NA  | 0     | 9  | 9 Not-determined  | Genome-fragment | NA | 0     | 0     |
| S1-final-viral-combined_k141_49888   | [0_partial] | 39556 | Yes | NA  | 28256 | 7  | 19 Medium-quality | Genome-fragment | NA | 68.23 | 28.57 |
| S12-final-viral-combined_k141_201923 | [full]      | 1426  | No  | NA  | 0     | 0  | 0 Low-quality     | Genome-fragment | NA | 2.83  | 0     |
| S1-final-viral-combined_k141_375477  | [0_partial] | 22579 | No  | NA  | 0     | 0  | 0 Not-determined  | Genome-fragment | NA | 0     | 0     |
| S12_k141_122617                      |             | 1426  | No  | NA  | 1     | 0  | 0 Low-quality     | Genome-fragment | NA | 0.78  | 0     |
| S1-final-viral-combined_k141_294159  | [0_partial] | 18405 | No  | NA  | 0     | 9  | 9 Not-determined  | Genome-fragment | NA | 0     | 0     |
| S1-final-viral-combined_k141_294159  | [1_partial] | 13349 | No  | NA  | 0     | 6  | 6 Not-determined  | Genome-fragment | NA | 0     | 0     |
| S2-final-viral-combined_k141_114024  | [full]      | 1426  | No  | NA  | 0     | 0  | 0 Low-quality     | Genome-fragment | NA | 1.67  | 0     |
| S2-final-viral-combined_k141_126674  | [full]      | 1426  | No  | NA  | 0     | 0  | 0 Low-quality     | Genome-fragment | NA | 2.6   | 0     |
| S1-final-viral-combined_k141_115303  | [1 2gene]   | 1159  | No  | NA  | 0     | 0  | 0 Not-determined  | Genome-fragment | NA | 3.42  | 0     |
| S11-final-viral-combined_k141_281579 | [full]      | 1427  | No  | NA  | 0     | 0  | 0 Low-quality     | Genome-fragment | NA | 0     | 0     |
| S1-final-viral-combined_k141_164803  | [full]      | 1427  | No  | NA  | 0     | 0  | 0 Low-quality     | Genome-fragment | NA | 1.46  | 0     |
| S1-final-viral-combined_k141_296380  | [1 2gene]   | 1223  | No  | NA  | 0     | 2  | 2 Not-determined  | Genome-fragment | NA | 2.13  | 0     |
| S5-final-viral-combined_k141_70563   | [1 2gene]   | 1427  | No  | NA  | 1     | 0  | 0 Low-quality     | Genome-fragment | NA | 2.79  | 0     |
| S7_k141_244184                       |             | 1427  | No  | NA  | 0     | 0  | 0 Low-quality     | Genome-fragment | NA | 0     | 0     |
| S17_k141_143253                      |             | 1427  | No  | NA  | 0     | 0  | 1 Low-quality     | Genome-fragment | NA | 0.53  | 0     |
| S4-final-viral-combined_k141_29280   | [full]      | 1427  | No  | NA  | 0     | 0  | 0 Low-quality     | Genome-fragment | NA | 2.17  | 0     |
| S4-final-viral-combined_k141_166564  | [full]      | 1427  | No  | NA  | 1     | 0  | 0 Low-quality     | Genome-fragment | NA | 2.85  | 0     |
| S8-final-viral-combined_k141_187829  | [full]      | 1427  | No  | NA  | 0     | 0  | 0 Low-quality     | Genome-fragment | NA | 0.92  | 0     |
| S8_k141_5161                         |             |       |     |     |       |    |                   |                 |    |       |       |



|                                      |          |      |    |    |   |   |                |                 |      |   |
|--------------------------------------|----------|------|----|----|---|---|----------------|-----------------|------|---|
| S8-final-viral-combined_k141_9687    | [full]   | 1430 | No | NA | 0 | 0 | Low-quality    | Genome-fragment | 3.75 | 0 |
| S11-final-viral-combined_k141_140531 | [full]   | 1431 | No | NA | 0 | 0 | Low-quality    | Genome-fragment | 2.86 | 0 |
| S1-final-viral-combined_k141_3923    | [H2gene] | 1091 | No | NA | 0 | 0 | Not-determined | Genome-fragment | NA   | 0 |
| S1-final-viral-combined_k141_168077  | [H2gene] | 1585 | No | NA | 0 | 1 | Not-determined | Genome-fragment | NA   | 0 |
| S1-final-viral-combined_k141_185004  | [H2gene] | 2118 | No | NA | 0 | 0 | Not-determined | Genome-fragment | NA   | 0 |
| S1-final-viral-combined_k141_284006  | [full]   | 1431 | No | NA | 0 | 1 | Low-quality    | Genome-fragment | 0.45 | 0 |
| S5-final-viral-combined_k141_45645   | [full]   | 1431 | No | NA | 0 | 1 | Low-quality    | Genome-fragment | 2.6  | 0 |
| S12-final-viral-combined_k141_232380 | [full]   | 1431 | No | NA | 0 | 1 | Low-quality    | Genome-fragment | 1.2  | 0 |
| S12-final-viral-combined_k141_364929 | [full]   | 1431 | No | NA | 0 | 1 | Low-quality    | Genome-fragment | 3.19 | 0 |
| S6-final-viral-combined_k141_140622  | [full]   | 1431 | No | NA | 3 | 0 | Low-quality    | Genome-fragment | 2.37 | 0 |
| S9-final-viral-combined_k141_104199  | [full]   | 1432 | No | NA | 1 | 0 | Low-quality    | Genome-fragment | 3.51 | 0 |
| S9-final-viral-combined_k141_127682  | [full]   | 1432 | No | NA | 0 | 0 | Low-quality    | Genome-fragment | 2.41 | 0 |
| S11-final-viral-combined_k141_146760 | [H2gene] | 1432 | No | NA | 1 | 0 | Low-quality    | Genome-fragment | 3.26 | 0 |
| S1-final-viral-combined_k141_232101  | [H2gene] | 1432 | No | NA | 1 | 0 | Low-quality    | Genome-fragment | 2.24 | 0 |
| S1-final-viral-combined_k141_108797  | [H2gene] | 1142 | No | NA | 0 | 0 | Not-determined | Genome-fragment | NA   | 0 |
| S7-final-viral-combined_k141_126180  | [full]   | 1432 | No | NA | 0 | 0 | Low-quality    | Genome-fragment | 0.83 | 0 |
| S1-final-viral-combined_k141_4853    | [H2gene] | 7370 | No | NA | 0 | 1 | Not-determined | Genome-fragment | NA   | 0 |
| S12-final-viral-combined_k141_251840 | [full]   | 1432 | No | NA | 0 | 1 | Low-quality    | Genome-fragment | 2.5  | 0 |
| S1-final-viral-combined_k141_5016    | [H2gene] | 1588 | No | NA | 0 | 1 | Not-determined | Genome-fragment | NA   | 0 |
| S12-final-viral-combined_k141_331259 | [full]   | 1432 | No | NA | 0 | 2 | Low-quality    | Genome-fragment | 2.37 | 0 |
| S1-final-viral-combined_k141_302302  | [H2gene] | 1208 | No | NA | 0 | 0 | Not-determined | Genome-fragment | NA   | 0 |
| S2-final-viral-combined_k141_174596  | [full]   | 1432 | No | NA | 0 | 0 | Low-quality    | Genome-fragment | 1.08 | 0 |
| S9_k141_69702                        |          | 1433 | No | NA | 0 | 0 | Low-quality    | Genome-fragment | 2.39 | 0 |
| S1-final-viral-combined_k141_169564  | [H2gene] | 1161 | No | NA | 0 | 1 | Not-determined | Genome-fragment | NA   | 0 |
| S1-final-viral-combined_k141_126521  | [full]   | 1433 | No | NA | 1 | 0 | Low-quality    | Genome-fragment | 2.96 | 0 |
| S1-final-viral-combined_k141_219842  | [H2gene] | 1013 | No | NA | 0 | 0 | Not-determined | Genome-fragment | NA   | 0 |
| S1-final-viral-combined_k141_137939  | [H2gene] | 1401 | No | NA | 0 | 0 | Not-determined | Genome-fragment | NA   | 0 |
| S7-final-viral-combined_k141_119825  | [full]   | 1433 | No | NA | 0 | 0 | Low-quality    | Genome-fragment | 2.35 | 0 |
| S1-final-viral-combined_k141_319378  | [H2gene] | 3578 | No | NA | 0 | 0 | Not-determined | Genome-fragment | NA   | 0 |
| S12-final-viral-combined_k141_178275 | [H2gene] | 1433 | No | NA | 1 | 0 | Low-quality    | Genome-fragment | 3.63 | 0 |
| S1-final-viral-combined_k141_121148  | [H2gene] | 1116 | No | NA | 0 | 0 | Not-determined | Genome-fragment | NA   | 0 |
| S1-final-viral-combined_k141_384707  | [H2gene] | 1387 | No | NA | 0 | 2 | Not-determined | Genome-fragment | NA   | 0 |
| S2_k141_159607                       |          | 1433 | No | NA | 0 | 1 | Low-quality    | Genome-fragment | 0.45 | 0 |
| S4_k141_59304                        |          | 1433 | No | NA | 0 | 0 | Low-quality    | Genome-fragment | 2.08 | 0 |
| S8-final-viral-combined_k141_245074  | [full]   | 1433 | No | NA | 1 | 0 | Low-quality    | Genome-fragment | 4.38 | 0 |
| S9-final-viral-combined_k141_7398    | [full]   | 1434 | No | NA | 0 | 0 | Low-quality    | Genome-fragment | 3.12 | 0 |
| S1-final-viral-combined_k141_301253  | [full]   | 1434 | No | NA | 0 | 0 | Low-quality    | Genome-fragment | 3.93 | 0 |
| S1-final-viral-combined_k141_55595   | [full]   | 1434 | No | NA | 2 | 0 | Low-quality    | Genome-fragment | 2.83 | 0 |
| S5-final-viral-combined_k141_849777  | [full]   | 1434 | No | NA | 1 | 0 | Low-quality    | Genome-fragment | 0.64 | 0 |
| S17-final-viral-combined_k141_190807 | [full]   | 1434 | No | NA | 2 | 0 | Low-quality    | Genome-fragment | 3.66 | 0 |
| S17-final-viral-combined_k141_59779  | [full]   | 1434 | No | NA | 0 | 0 | Low-quality    | Genome-fragment | 3.66 | 0 |
| S1-final-viral-combined_k141_254164  | [H2gene] | 1030 | No | NA | 0 | 0 | Not-determined | Genome-fragment | NA   | 0 |
| S1-final-viral-combined_k141_71935   | [H2gene] | 1665 | No | NA | 0 | 0 | Not-determined | Genome-fragment | NA   | 0 |
| S2-final-viral-combined_k141_150199  | [full]   | 1434 | No | NA | 0 | 2 | Low-quality    | Genome-fragment | 0.86 | 0 |
| S8-final-viral-combined_k141_247523  | [full]   | 1434 | No | NA | 0 | 0 | Low-quality    | Genome-fragment | 1.22 | 0 |
| S11-final-viral-combined_k141_54116  | [full]   | 1435 | No | NA | 0 | 0 | Low-quality    | Genome-fragment | 3.49 | 0 |
| S1-final-viral-combined_k141_67577   | [full]   | 1435 | No | NA | 0 | 1 | Low-quality    | Genome-fragment | 0.52 | 0 |
| S1-final-viral-combined_k141_70953   | [full]   | 1435 | No | NA | 0 | 0 | Low-quality    | Genome-fragment | 3.36 | 0 |
| S1-final-viral-combined_k141_222481  | [full]   | 1435 | No | NA | 0 | 0 | Low-quality    | Genome-fragment | 2.38 | 0 |
| S17-final-viral-combined_k141_43956  | [full]   | 1435 | No | NA | 0 | 0 | Low-quality    | Genome-fragment | 2.65 | 0 |
| S1-final-viral-combined_k141_89267   | [H2gene] | 3957 | No | NA | 0 | 1 | Not-determined | Genome-fragment | NA   | 0 |
| S1-final-viral-combined_k141_221901  | [H2gene] | 2752 | No | NA | 0 | 0 | Not-determined | Genome-fragment | NA   | 0 |
| S1-final-viral-combined_k141_188898  | [H2gene] | 3077 | No | NA | 0 | 0 | Not-determined | Genome-fragment | NA   | 0 |
| S12-final-viral-combined_k141_375032 | [full]   | 1435 | No | NA | 3 | 0 | Low-quality    | Genome-fragment | 2.81 | 0 |
| S2-final-viral-combined_k141_225071  | [full]   | 1435 | No | NA | 3 | 0 | Low-quality    | Genome-fragment | 4.01 | 0 |
| S4_k141_164089                       |          | 1435 | No | NA | 0 | 0 | Low-quality    | Genome-fragment | 2.4  | 0 |
| S6_k141_36596                        |          | 1435 | No | NA | 0 | 0 | Low-quality    | Genome-fragment | 1.96 | 0 |
| S8-final-viral-combined_k141_178292  | [full]   | 1435 | No | NA | 0 | 0 | Low-quality    | Genome-fragment | 2.97 | 0 |
| S11_k141_260189                      |          | 1436 | No | NA | 0 | 0 | Low-quality    | Genome-fragment | 1.58 | 0 |
| S1_k141_96876                        |          | 1436 | No | NA | 0 | 0 | Low-quality    | Genome-fragment | 2.87 | 0 |
| S5-final-viral-combined_k141_188391  | [full]   | 1436 | No | NA | 0 | 0 | Low-quality    | Genome-fragment | 1.2  | 0 |
| S1-final-viral-combined_k141_369640  | [H2gene] | 2403 | No | NA | 0 | 0 | Not-determined | Genome-fragment | NA   | 0 |
| S1-final-viral-combined_k141_369676  | [H2gene] | 2031 | No | NA | 0 | 0 | Not-determined | Genome-fragment | NA   | 0 |
| S7-final-viral-combined_k141_200930  | [full]   | 1436 | No | NA | 1 | 0 | Low-quality    | Genome-fragment | 2.29 | 0 |
| S1-final-viral-combined_k141_336490  | [H2gene] | 1108 | No | NA | 2 | 0 | Not-determined | Genome-fragment | NA   | 0 |
| S1-final-viral-combined_k141_386715  | [H2gene] | 2317 | No | NA | 0 | 0 | Not-determined | Genome-fragment | NA   | 0 |
| S12_k141_93753                       |          | 1436 | No | NA | 0 | 0 | Low-quality    | Genome-fragment | 1.43 | 0 |
| S2_k141_79681                        |          | 1436 | No | NA | 1 | 0 | Low-quality    | Genome-fragment | 2.68 | 0 |
| S8-final-viral-combined_k141_208289  | [full]   | 1436 | No | NA | 0 | 0 | Low-quality    | Genome-fragment | 3.39 | 0 |
| S9-final-viral-combined_k141_85194   | [full]   | 1437 | No | NA | 0 | 0 | Low-quality    | Genome-fragment | 1.74 | 0 |
| S1-final-viral-combined_k141_354598  | [H2gene] | 1508 | No | NA | 0 | 0 | Not-determined | Genome-fragment | NA   | 0 |
| S11-final-viral-combined_k141_190748 | [H2gene] | 1437 | No | NA | 0 | 0 | Low-quality    | Genome-fragment | 0.96 | 0 |
| S11-final-viral-combined_k141_59852  | [full]   | 1437 | No | NA | 0 | 0 | Low-quality    | Genome-fragment | 2.63 | 0 |
| S11-final-viral-combined_k141_326912 | [H2gene] | 1437 | No | NA | 1 | 0 | Low-quality    | Genome-fragment | 3.68 | 0 |
| S1_k141_377661                       |          | 1437 | No | NA | 0 | 0 | Low-quality    | Genome-fragment | 1.92 | 0 |
| S5-final-viral-combined_k141_190554  | [full]   | 1437 | No | NA | 1 | 0 | Low-quality    | Genome-fragment | 3.11 | 0 |
| S1-final-viral-combined_k141_337301  | [H2gene] | 5748 | No | NA | 0 | 1 | Not-determined | Genome-fragment | NA   | 0 |
| S5-final-viral-combined_k141_144301  | [full]   | 1437 | No | NA | 2 | 0 | Low-quality    | Genome-fragment | 2.88 | 0 |
| S1-final-viral-combined_k141_322621  | [H2gene] | 1580 | No | NA | 0 | 0 | Not-determined | Genome-fragment | NA   | 0 |
| S17-final-viral-combined_k141_166993 | [full]   | 1437 | No | NA | 1 | 0 | Low-quality    | Genome-fragment | 3.36 | 0 |
| S1-final-viral-combined_k141_355110  | [H2gene] | 1189 | No | NA | 0 | 0 | Not-determined | Genome-fragment | NA   | 0 |
| S17-final-viral-combined_k141_81451  | [full]   | 1437 | No | NA | 0 | 0 | Low-quality    | Genome-fragment | 1    | 0 |
| S6-final-viral-combined_k141_138698  | [full]   | 1437 | No | NA | 0 | 1 | Low-quality    | Genome-fragment | 2.11 | 0 |
| S8-final-viral-combined_k141_74322   | [full]   | 1437 | No | NA | 0 | 0 | Low-quality    | Genome-fragment | 3.07 | 0 |
| S9-final-viral-combined_k141_56382   | [full]   | 1438 | No | NA | 0 | 0 | Low-quality    | Genome-fragment | 5.05 | 0 |
| S9-final-viral-combined_k141_4589    | [full]   | 1438 | No | NA | 1 | 0 | Low-quality    | Genome-fragment | 2.04 | 0 |
| S9_k141_76277                        |          | 1438 | No | NA | 0 | 0 | Low-quality    | Genome-fragment | 0.58 | 0 |
| S1-final-viral-combined_k141_289087  | [H2gene] | 1056 | No | NA | 0 | 0 | Not-determined | Genome-fragment | NA   | 0 |
| S11_k141_142257                      |          | 1438 | No | NA | 0 | 0 | Low-quality    | Genome-fragment | 2.81 | 0 |
| S1-final-viral-combined_k141_377976  | [full]   | 1438 | No | NA | 0 | 0 | Low-quality    | Genome-fragment | 3.04 | 0 |
| S1-final-viral-combined_k141_49157   | [full]   | 1438 | No | NA | 0 | 1 | Low-quality    | Genome-fragment | 0.45 | 0 |
| S3-final-viral-combined_k141_68021   | [full]   | 1438 | No | NA | 0 | 0 | Low-quality    | Genome-fragment | 2.24 | 0 |
| S5-final-viral-combined_k141_71431   | [full]   | 1438 | No | NA | 1 | 0 | Low-quality    | Genome-fragment | 2.15 | 0 |
| S1-final-viral-combined_k141_58869   | [H2gene] | 1039 | No | NA | 0 | 0 | Not-determined | Genome-fragment | NA   | 0 |
| S1-final-viral-combined_k141_157389  | [H2gene] | 2225 | No | NA | 0 | 0 | Not-determined | Genome-fragment | NA   | 0 |
| S5_k141_202695                       |          | 1438 | No | NA | 0 | 1 | Low-quality    | Genome-fragment | 4.68 | 0 |
| S7-final-viral-combined_k141_167275  | [full]   | 1438 | No | NA | 0 | 0 | Low-quality    | Genome-fragment | 2.07 | 0 |
| S1-final-viral-combined_k141_191955  | [H2gene] | 1952 | No | NA | 0 | 2 | Not-determined | Genome-fragment | NA   | 0 |
| S17-final-viral-combined_k141_97171  | [full]   | 1438 | No | NA | 0 | 0 | Low-quality    | Genome-fragment | 0.93 | 0 |
| S1-final-viral-combined_k141_173913  | [H2gene] | 2100 | No | NA | 0 | 0 | Not-determined | Genome-fragment | NA   | 0 |
| S1-final-viral-combined_k141_142317  | [H2gene] | 1077 | No | NA | 0 | 0 | Not-determined | Genome-fragment | NA   | 0 |
| S1-final-viral-combined_k141_224315  | [H2gene] | 1142 | No | NA | 0 | 0 | Not-determined | Genome-fragment | NA   | 0 |
| S17-final-viral-combined_k141_163596 | [full]   | 1438 | No | NA | 0 | 0 | Low-quality    | Genome-fragment | 3.09 | 0 |
| S12-final-viral-combined_k141_224226 | [full]   | 1438 | No | NA | 0 | 1 | Low-quality    | Genome-fragment | 0.41 | 0 |
| S4_k141_115441                       |          | 1438 | No | NA | 0 | 0 | Low-quality    | Genome-fragment | 2.35 | 0 |
| S6_k141_98240                        |          | 1438 | No | NA | 0 | 2 | Low-quality    | Genome-fragment | 0.36 | 0 |
| S1-final-viral-combined_k141_273937  | [H2gene] | 1060 | No | NA | 0 | 1 | Not-determined | Genome-fragment | NA   | 0 |
| S1-final-viral-combined_k141_192678  | [H2gene] | 1017 | No | NA | 0 | 1 | Not-determined | Genome-fragment | NA   | 0 |
| S9-final-viral-combined_k141_12886   | [full]   | 1439 | No | NA | 0 | 0 | Low-quality    | Genome-fragment | 1.77 | 0 |
| S11-final-viral-combined_k141_223596 | [full]   | 1439 | No | NA | 0 | 0 | Low-quality    | Genome-fragment | 2.94 | 0 |
| S11-final-viral-combined_k141_219754 | [full]   | 1439 | No | NA | 0 | 0 | Low-quality    | Genome-fragment | 2.06 | 0 |
| S7-final-viral-combined_k141_224211  | [full]   | 1439 | No | NA | 0 | 0 | Low-quality    | Genome-fragment | 0.48 | 0 |
| S17-final-viral-combined_k141_189176 | [H2gene] | 1439 | No | NA | 0 | 0 | Low-quality    | Genome-fragment | 2.01 | 0 |
| S1-final-viral-combined_k141_252182  | [H2gene] | 2435 | No | NA | 0 | 2 | Not-determined | Genome-fragment | NA   | 0 |
| S12-final-viral-combined_k141_195140 | [full]   | 1439 | No | NA | 0 | 0 | Low-quality    | Genome-fragment | 1    | 0 |
| S2-final-viral-combined_k141_137432  | [full]   | 1439 | No | NA | 0 | 1 | Low-quality    | Genome-fragment | 0.77 | 0 |
| S8-final-viral-combined_k141_157432  | [H2gene] | 1439 | No | NA | 1 | 0 | Low-quality    | Genome-fragment | 3.14 | 0 |
| S1-final-viral-combined_k141_240043  | [H2gene] | 1062 | No | NA | 0 | 0 | Not-determined | Genome-fragment | NA   | 0 |
| S1-final-viral-combined_k141_283217  | [H2gene] | 1440 | No | NA | 1 | 0 | Low-quality    | Genome-fragment | 3.17 | 0 |
| S7_k141_242461                       |          | 1440 | No | NA | 0 | 0 | Low-quality    | Genome-fragment | 4.06 | 0 |
| S17-final-viral-combined_k141_216559 | [H2gene] | 1440 | No | NA | 1 | 0 | Low-quality    | Genome-fragment | 3.62 | 0 |
| S12-final-viral-combined_k141_767241 | [H2gene] | 1440 | No | NA | 0 | 0 | Low-quality    | Genome-fragment | 1.85 | 0 |
| S12-final-viral-combined_k141_109395 | [H2gene] | 1440 | No | NA | 1 | 0 | Low-quality    | Genome-fragment | 3.6  | 0 |
| S12_k141_266257                      |          | 1440 | No | NA | 1 | 0 | Low-quality    | Genome-fragment | 1.33 | 0 |
| S1-final-viral-combined_k141_137082  | [full]   | 1440 | No | NA | 0 | 0 | Low-quality    | Genome-fragment | 1.34 | 0 |
| S2_k141_1397                         |          | 1440 | No | NA | 0 | 0 | Low-quality    | Genome-fragment | 2.87 | 0 |
| S1-final-viral-combined_k141_94751   | [H2gene] | 2734 | No | NA | 0 | 0 | Not-determined | Genome-fragment | NA   | 0 |
| S2_k141_155308                       |          | 1440 | No | NA | 0 | 0 | Low-quality    | Genome-fragment | 3.28 | 0 |
| S9-final-viral-combined_k141_81970   | [full]   | 1441 | No | NA | 3 | 0 | Low-quality    | Genome-fragment | 3.09 | 0 |



|                                             |      |     |    |     |   |                |                 |    |       |
|---------------------------------------------|------|-----|----|-----|---|----------------|-----------------|----|-------|
| S1-final-viral-combined_k141_114999  H2gene | 2803 | No  | NA | 0   | 0 | Not-determined | Genome-fragment | NA | 0     |
| S1_k141_493176                              | 3307 | No  | NA | 0   | 0 | Not-determined | Genome-fragment | NA | 0     |
| S1_k141_378447                              | 1365 | No  | NA | 0   | 0 | Not-determined | Genome-fragment | NA | 0     |
| S1_k141_329087                              | 1020 | No  | NA | 0   | 1 | Not-determined | Genome-fragment | NA | 0     |
| S1_k141_312637                              | 1403 | No  | NA | 0   | 0 | Not-determined | Genome-fragment | NA | 0     |
| S1_k141_345335                              | 1064 | No  | NA | 0   | 1 | Not-determined | Genome-fragment | NA | 0     |
| S1_k141_16464                               | 3900 | No  | NA | 0   | 2 | Not-determined | Genome-fragment | NA | 0     |
| S5-final-viral-combined_k141_67929  full    | 1443 | No  | NA | 0   | 2 | Low-quality    | Genome-fragment | NA | 3.41  |
| S1_k141_32948                               | 1152 | No  | NA | 0   | 1 | Not-determined | Genome-fragment | NA | 0     |
| S1_k141_312671                              | 1025 | No  | NA | 0   | 1 | Not-determined | Genome-fragment | NA | 0     |
| S1_k141_197462                              | 3644 | No  | NA | 0   | 8 | Not-determined | Genome-fragment | NA | 0     |
| S17-final-viral-combined_k141_203716  full  | 1443 | No  | NA | 1   | 0 | Low-quality    | Genome-fragment | NA | 2.13  |
| S1_k141_246805                              | 1324 | No  | NA | 0   | 1 | Not-determined | Genome-fragment | NA | 0     |
| S1_k141_378494                              | 2025 | No  | NA | 0   | 0 | Not-determined | Genome-fragment | NA | 0     |
| S1_k141_329114                              | 2306 | No  | NA | 0   | 2 | Not-determined | Genome-fragment | NA | 0     |
| S1_k141_33005                               | 1003 | No  | NA | 0   | 2 | Not-determined | Genome-fragment | NA | 0     |
| S12-final-viral-combined_k141_329084  full  | 1443 | No  | NA | 2   | 0 | Low-quality    | Genome-fragment | NA | 2.65  |
| S1_k141_263297                              | 1310 | No  | NA | 0   | 1 | Not-determined | Genome-fragment | NA | 0     |
| S1_k141_148157                              | 2625 | No  | NA | 0   | 0 | Not-determined | Genome-fragment | NA | 0     |
| S12-final-viral-combined_k141_45789  full   | 1443 | No  | NA | 0   | 0 | Low-quality    | Genome-fragment | NA | 2.18  |
| S1_k141_181066                              | 1039 | No  | NA | 0   | 0 | Not-determined | Genome-fragment | NA | 0     |
| S1_k141_378514                              | 1203 | No  | NA | 0   | 2 | Not-determined | Genome-fragment | NA | 0     |
| S1_k141_329152                              | 1221 | No  | NA | 0   | 1 | Not-determined | Genome-fragment | NA | 0     |
| S1_k141_329161                              | 1527 | No  | NA | 0   | 0 | Not-determined | Genome-fragment | NA | 0     |
| S1_k141_152                                 | 1493 | No  | NA | 0   | 0 | Not-determined | Genome-fragment | NA | 0     |
| S1_k141_296285                              | 3781 | No  | NA | 0   | 1 | Not-determined | Genome-fragment | NA | 0     |
| S1_k141_345622                              | 1420 | No  | NA | 0   | 0 | Not-determined | Genome-fragment | NA | 0     |
| S1_k141_296300                              | 1409 | No  | NA | 0   | 1 | Not-determined | Genome-fragment | NA | 0     |
| S1_k141_115117                              | 1086 | No  | NA | 0   | 1 | Not-determined | Genome-fragment | NA | 0     |
| S1_k141_164646                              | 1545 | No  | NA | 0   | 0 | Not-determined | Genome-fragment | NA | 0     |
| S12_k141_316218                             | 1443 | No  | NA | 0   | 2 | Low-quality    | Genome-fragment | NA | 0.72  |
| S1_k141_59823                               | 2712 | No  | NA | 0   | 0 | Not-determined | Genome-fragment | NA | 0     |
| S1_k141_164656                              | 1051 | No  | NA | 0   | 0 | Not-determined | Genome-fragment | NA | 0     |
| S1_k141_16574                               | 1056 | No  | NA | 0   | 1 | Not-determined | Genome-fragment | NA | 0     |
| S1_k141_263323                              | 2916 | No  | NA | 0   | 0 | Not-determined | Genome-fragment | NA | 0     |
| S1_k141_148159                              | 1581 | No  | NA | 0   | 0 | Not-determined | Genome-fragment | NA | 0     |
| S1_k141_197558                              | 2032 | No  | NA | 0   | 0 | Not-determined | Genome-fragment | NA | 0     |
| S6-final-viral-combined_k141_16737  full    | 1443 | No  | NA | 1   | 0 | Low-quality    | Genome-fragment | NA | 2.78  |
| S1_k141_263333                              | 1395 | No  | NA | 0   | 1 | Not-determined | Genome-fragment | NA | 0     |
| S1_k141_362171                              | 1136 | No  | NA | 0   | 0 | Not-determined | Genome-fragment | NA | 0     |
| S1_k141_181157                              | 7315 | No  | NA | 0   | 0 | Not-determined | Genome-fragment | NA | 0     |
| S1_k141_181161                              | 1161 | No  | NA | 0   | 1 | Not-determined | Genome-fragment | NA | 0     |
| S1_k141_148277                              | 1204 | No  | NA | 0   | 2 | Not-determined | Genome-fragment | NA | 0     |
| S1_k141_131885                              | 2046 | No  | NA | 0   | 1 | Not-determined | Genome-fragment | NA | 0     |
| S6-final-viral-combined_k141_44970  full    | 1443 | No  | NA | 0   | 2 | Low-quality    | Genome-fragment | NA | 0.6   |
| S1_k141_148194                              | 1041 | No  | NA | 0   | 2 | Not-determined | Genome-fragment | NA | 0     |
| S1_k141_263360                              | 1054 | No  | NA | 0   | 0 | Not-determined | Genome-fragment | NA | 0     |
| S1_k141_197596                              | 1059 | No  | NA | 0   | 0 | Not-determined | Genome-fragment | NA | 0     |
| S1_k141_279900                              | 4048 | No  | NA | 0   | 0 | Not-determined | Genome-fragment | NA | 0     |
| S1_k141_181180                              | 1088 | No  | NA | 0   | 0 | Not-determined | Genome-fragment | NA | 0     |
| S1_k141_230587                              | 1208 | No  | NA | 0   | 1 | Not-determined | Genome-fragment | NA | 1.02  |
| S8-final-viral-combined_k141_271824  full   | 1443 | No  | NA | 0   | 1 | Low-quality    | Genome-fragment | NA | 4.07  |
| S8_k141_267963                              | 1443 | No  | NA | 0   | 0 | Not-determined | Genome-fragment | NA | 0     |
| S1_k141_181158                              | 3673 | No  | NA | 0   | 8 | Not-determined | Genome-fragment | NA | 0     |
| S1_k141_329277                              | 1169 | No  | NA | 0   | 1 | Not-determined | Genome-fragment | NA | 0     |
| S1_k141_353                                 | 1389 | No  | NA | 0   | 2 | Not-determined | Genome-fragment | NA | 0     |
| S1_k141_230595                              | 1170 | No  | NA | 0   | 0 | Not-determined | Genome-fragment | NA | 0     |
| S1_k141_16701                               | 4312 | No  | NA | 0   | 3 | Not-determined | Genome-fragment | NA | 0     |
| S11-final-viral-combined_k141_27757  full   | 1444 | No  | NA | 0   | 1 | Low-quality    | Genome-fragment | NA | 2.04  |
| S1_k141_362207                              | 2010 | No  | NA | 0   | 3 | Not-determined | Genome-fragment | NA | 0     |
| S11-final-viral-combined_k141_149277  full  | 1444 | No  | NA | 0   | 0 | Low-quality    | Genome-fragment | NA | 0.57  |
| S1_k141_230630                              | 3470 | No  | NA | 0   | 1 | Not-determined | Genome-fragment | NA | 0     |
| S1_k141_410                                 | 2008 | No  | NA | 0   | 2 | Not-determined | Genome-fragment | NA | 0     |
| S1_k141_280017                              | 1118 | No  | NA | 0   | 1 | Not-determined | Genome-fragment | NA | 0     |
| S1_k141_65939                               | 1198 | No  | NA | 0   | 1 | Not-determined | Genome-fragment | NA | 0     |
| S1_k141_65940                               | 1273 | No  | NA | 0   | 1 | Not-determined | Genome-fragment | NA | 0     |
| S1_k141_230702                              | 4605 | No  | NA | 0   | 1 | Not-determined | Genome-fragment | NA | 0     |
| S1_k141_312980                              | 1292 | No  | NA | 0   | 0 | Not-determined | Genome-fragment | NA | 1.26  |
| S1-final-viral-combined_k141_386694  full   | 1444 | No  | NA | 0   | 0 | Low-quality    | Genome-fragment | NA | 0     |
| S1_k141_115468                              | 1089 | No  | NA | 0   | 0 | Not-determined | Genome-fragment | NA | 0     |
| S1-final-viral-combined_k141_28675  H2gene  | 1444 | No  | NA | 2   | 0 | Low-quality    | Genome-fragment | NA | 3.1   |
| S1_k141_262303                              | 1103 | No  | NA | 0   | 1 | Not-determined | Genome-fragment | NA | 0     |
| S1_k141_230767                              | 2393 | No  | NA | 0   | 1 | Not-determined | Genome-fragment | NA | 0     |
| S1_k141_132060                              | 1269 | No  | NA | 0   | 1 | Not-determined | Genome-fragment | NA | 0     |
| S3-final-viral-combined_k141_2170  full     | 1444 | No  | NA | 1   | 0 | Low-quality    | Genome-fragment | NA | 2.69  |
| S1_k141_148367                              | 2326 | No  | NA | 0   | 3 | Not-determined | Genome-fragment | NA | 0     |
| S1_k141_296543                              | 1012 | No  | NA | 0   | 1 | Not-determined | Genome-fragment | NA | 0     |
| S1_k141_296545                              | 2004 | No  | NA | 0   | 1 | Not-determined | Genome-fragment | NA | 0     |
| S7-final-viral-combined_k141_18334  full    | 1444 | No  | NA | 0   | 0 | Low-quality    | Genome-fragment | NA | 1.81  |
| S1_k141_362352                              | 1801 | No  | NA | 0   | 1 | Not-determined | Genome-fragment | NA | 0     |
| S1_k141_148425                              | 1073 | No  | NA | 0   | 1 | Not-determined | Genome-fragment | NA | 0     |
| S1_k141_82755                               | 3302 | No  | NA | 0   | 3 | Not-determined | Genome-fragment | NA | 0     |
| S7-final-viral-combined_k141_193996  full   | 1444 | No  | NA | 0   | 1 | Low-quality    | Genome-fragment | NA | 1.4   |
| S1_k141_247158                              | 1102 | No  | NA | 0   | 1 | Not-determined | Genome-fragment | NA | 0     |
| S1_k141_49680                               | 1269 | No  | NA | 0   | 1 | Not-determined | Genome-fragment | NA | 0     |
| S1_k141_33138                               | 4323 | No  | NA | 0   | 6 | Not-determined | Genome-fragment | NA | 0     |
| S1_k141_33140                               | 3356 | No  | NA | 0   | 0 | Not-determined | Genome-fragment | NA | 0     |
| S17-k141_165843                             | 1444 | No  | NA | 0   | 1 | Low-quality    | Genome-fragment | NA | 3.27  |
| S1_k141_247167                              | 2280 | No  | NA | 0   | 1 | Not-determined | Genome-fragment | NA | 0     |
| S1_k141_345875                              | 3968 | No  | NA | 0   | 3 | Not-determined | Genome-fragment | NA | 0     |
| S1_k141_263569                              | 4738 | No  | NA | 0   | 0 | Not-determined | Genome-fragment | NA | 0     |
| S1_k141_263570                              | 2641 | No  | NA | 0   | 0 | Not-determined | Genome-fragment | NA | 0     |
| S1_k141_230826                              | 1106 | No  | NA | 0   | 1 | Not-determined | Genome-fragment | NA | 0     |
| S1_k141_99097                               | 2270 | No  | NA | 0   | 1 | Not-determined | Genome-fragment | NA | 0     |
| S2-final-viral-combined_k141_140621  full   | 1444 | No  | NA | 0   | 1 | Low-quality    | Genome-fragment | NA | 4.34  |
| S1_k141_115609                              | 2774 | No  | NA | 0   | 1 | Not-determined | Genome-fragment | NA | 0     |
| S1_k141_49730                               | 3742 | No  | NA | 0   | 0 | Not-determined | Genome-fragment | NA | 0     |
| S4-final-viral-combined_k141_46786  full    | 1444 | No  | NA | 0   | 0 | Low-quality    | Genome-fragment | NA | 0.95  |
| S1_k141_378796                              | 1733 | No  | NA | 0   | 0 | Not-determined | Genome-fragment | NA | 0     |
| S1_k141_16854                               | 1404 | No  | NA | 0   | 1 | Not-determined | Genome-fragment | NA | 0     |
| S1_k141_197883                              | 1816 | No  | NA | 0   | 0 | Not-determined | Genome-fragment | NA | 0     |
| S1_k141_99134                               | 1481 | No  | NA | 0   | 2 | Not-determined | Genome-fragment | NA | 0     |
| S1_k141_313098                              | 1046 | No  | NA | 0   | 0 | Not-determined | Genome-fragment | NA | 0     |
| S1_k141_230843                              | 1922 | No  | NA | 0   | 1 | Not-determined | Genome-fragment | NA | 0     |
| S1_k141_214325                              | 2067 | No  | NA | 0   | 4 | Not-determined | Genome-fragment | NA | 0     |
| S1_k141_329453                              | 7011 | No  | NA | 0   | 4 | Not-determined | Genome-fragment | NA | 0     |
| S11-final-viral-combined_k141_42755  full   | 1445 | No  | NA | 1   | 0 | Low-quality    | Genome-fragment | NA | 3.61  |
| S1_k141_378877                              | 1204 | No  | NA | 0   | 2 | Not-determined | Genome-fragment | NA | 0     |
| S1_k141_230864                              | 5119 | No  | NA | 0   | 2 | Not-determined | Genome-fragment | NA | 0     |
| S1_k141_164963                              | 1307 | No  | NA | 0   | 1 | Not-determined | Genome-fragment | NA | 0     |
| S1_k141_378891                              | 3188 | No  | NA | 0   | 1 | Not-determined | Genome-fragment | NA | 0     |
| S1_k141_197951                              | 1278 | No  | NA | 0   | 1 | Not-determined | Genome-fragment | NA | 0     |
| S1_k141_296663                              | 1428 | No  | NA | 0   | 0 | Not-determined | Genome-fragment | NA | 0     |
| S11-final-viral-combined_k141_50886  full   | 1445 | No  | NA | 0   | 1 | Low-quality    | Genome-fragment | NA | 1.37  |
| S1-final-viral-combined_k141_24921  full    | 1445 | No  | NA | 0   | 0 | Low-quality    | Genome-fragment | NA | 1.83  |
| S1_k141_345988                              | 1304 | No  | NA | 0   | 0 | Not-determined | Genome-fragment | NA | 2.87  |
| S1_k141_378918                              | 3846 | No  | NA | 0   | 2 | Not-determined | Genome-fragment | NA | 0     |
| S1_k141_378927                              | 1126 | No  | NA | 0   | 0 | Not-determined | Genome-fragment | NA | 0     |
| S1_k141_115723                              | 3860 | No  | NA | 0   | 0 | Not-determined | Genome-fragment | NA | 0     |
| S1_k141_214385                              | 1203 | No  | NA | 0   | 0 | Not-determined | Genome-fragment | NA | 0     |
| S1_k141_66082                               | 1347 | No  | NA | 0   | 1 | Not-determined | Genome-fragment | NA | 0.78  |
| S1-final-viral-combined_k141_156970  H2gene | 1445 | No  | NA | 1   | 0 | Low-quality    | Genome-fragment | NA | 2.03  |
| S3_k141_83786                               | 1445 | No  | NA | 1   | 0 | Low-quality    | Genome-fragment | NA | 0     |
| S1_k141_263698                              | 1284 | No  | NA | 0   | 0 | Not-determined | Genome-fragment | NA | 2.73  |
| S5-final-viral-combined_k141_1305  H2gene   | 1445 | No  | NA | 1   | 0 | Low-quality    | Genome-fragment | NA | 0     |
| S1_k141_230917                              | 5964 | No  | NA | 0   | 1 | Not-determined | Genome-fragment | NA | 2.35  |
| S5_k141_16453                               | 1445 | No  | NA | 0   | 0 | Low-quality    | Genome-fragment | NA | 0     |
| S1_k141_247360                              | 4461 | No  | NA | 0   | 0 | Not-determined | Genome-fragment | NA | 0     |
| S1_k141_263779                              | 3050 | No  | NA | 0   | 0 | Not-determined | Genome-fragment | NA | 0     |
| S1_k141_115810                              | 1082 | No  | NA | 0   | 1 | Not-determined | Genome-fragment | NA | 0     |
| S12-final-viral-combined_k141_74326  full   | 1445 | No  | NA | 0   | 0 | Low-quality    | Genome-fragment | NA | 2.49  |
| S1_k141_214521                              | 3187 | No  | NA | 0   | 2 | Not-determined | Genome-fragment | NA | 0     |
| S1_k141_115861                              | 1105 | No  | NA | 0   | 1 | Not-determined | Genome-fragment | NA | 0     |
| S4-final-viral-combined_k141_98590  full    | 1445 | Yes | NA | 731 | 1 | Low-quality    | Genome-fragment | NA | 1.67  |
| S1_k141_176510                              | 1446 | No  | NA | 0   | 1 | Low-quality    | Genome-fragment | NA | 2.47  |
| S1_k141_66204                               | 4540 | No  | NA | 0   | 1 | Not-determined | Genome-fragment | NA | 0     |
| S1_k141_247400                              | 1008 | No  | NA | 0   | 1 | Not-determined | Genome-fragment | NA | 0     |
| S5_k141_63606                               | 1446 | No  | NA | 0   | 2 | Low-quality    | Genome-fragment | NA | 2.86  |
| S1_k141_148650                              | 1375 | No  | NA | 0   | 2 | Not-determined | Genome-fragment | NA | 0     |
| S1_k141_198088                              | 7010 | No  | NA | 0   | 2 | Not-determined | Genome-fragment | NA | 1.02  |
| S2-final-viral-combined_k141_243742  full   | 1446 | Yes | NA | 410 | 1 | Low-quality    | Genome-fragment | NA | 71.65 |
| S1_k141_214691                              | 1015 | No  | NA | 0   | 1 | Not-determined | Genome-fragment | NA | 0     |
| S1_k141_296810                              | 1210 | No  | NA | 0   | 2 | Not-determined | Genome-fragment | NA | 0     |
| S1_k141_165231                              | 1007 | No  | NA | 0   | 1 | Not-determined | Genome-fragment | NA | 0     |
| S1_k141_132457                              | 1007 | No  | NA | 0   | 0 | Not-determined | Genome-fragment | NA | 0     |
| S1_k141_247527                              | 1374 | No  | NA | 0   | 1 | Not-determined | Genome-fragment | NA |       |



|                                              |       |     |    |    |   |                |                 |       |      |
|----------------------------------------------|-------|-----|----|----|---|----------------|-----------------|-------|------|
| S11-final-viral-combined_k141_212727]]full   | 1448  | No  | NA | 0  | 1 | Low-quality    | Genome-fragment | 0.75  | 0    |
| S1_k141_362595                               | 1255  | No  | NA | 0  | 0 | Not-determined | Genome-fragment | NA    | 0    |
| S11-final-viral-combined_k141_77871]]full    | 1448  | No  | NA | 0  | 0 | Low-quality    | Genome-fragment | 3.68  | 0    |
| S1_k141_297144                               | 1091  | No  | NA | 0  | 2 | Not-determined | Genome-fragment | NA    | 0    |
| S11-final-viral-combined_k141_115652]]H2gene | 1448  | No  | NA | 2  | 0 | Low-quality    | Genome-fragment | 3.8   | 0    |
| S1_k141_247808                               | 1842  | No  | NA | 0  | 1 | Not-determined | Genome-fragment | NA    | 0    |
| S1_k141_264193                               | 1124  | No  | NA | 0  | 2 | Not-determined | Genome-fragment | NA    | 0    |
| S1_k141_379343                               | 4168  | No  | NA | 0  | 0 | Not-determined | Genome-fragment | NA    | 0    |
| S1_k141_264205                               | 1160  | No  | NA | 0  | 1 | Not-determined | Genome-fragment | NA    | 0    |
| S1_k141_280758                               | 1839  | No  | NA | 0  | 1 | Not-determined | Genome-fragment | NA    | 0    |
| S1_k141_1244                                 | 1507  | No  | NA | 0  | 1 | Not-determined | Genome-fragment | NA    | 0    |
| S1_k141_215101                               | 1069  | No  | NA | 0  | 1 | Not-determined | Genome-fragment | NA    | 0    |
| S1_k141_379361                               | 1117  | No  | NA | 0  | 0 | Not-determined | Genome-fragment | NA    | 0    |
| S11-final-viral-combined_k141_353806]]full   | 1448  | No  | NA | 0  | 0 | Low-quality    | Genome-fragment | 1.35  | 0    |
| S1_k141_280780                               | 1268  | No  | NA | 0  | 1 | Not-determined | Genome-fragment | NA    | 0    |
| S1_k141_313558                               | 7695  | No  | NA | 0  | 0 | Not-determined | Genome-fragment | NA    | 0    |
| S1_k141_280793                               | 1330  | No  | NA | 0  | 0 | Not-determined | Genome-fragment | NA    | 0    |
| S1_k141_1282                                 | 1346  | No  | NA | 0  | 1 | Not-determined | Genome-fragment | NA    | 0    |
| S1_k141_379373                               | 2994  | No  | NA | 0  | 2 | Not-determined | Genome-fragment | NA    | 0    |
| S11-final-viral-combined_k141_324199]]full   | 1448  | No  | NA | 0  | 0 | Low-quality    | Genome-fragment | 2.38  | 0    |
| S11-final-viral-combined_k141_393222]]full   | 1478  | No  | NA | 0  | 0 | Low-quality    | Genome-fragment | 2.37  | 0    |
| S1_k141_27423                                | 1478  | No  | NA | 0  | 0 | Not-determined | Genome-fragment | NA    | 0    |
| S1_k141_215157                               | 1302  | No  | NA | 0  | 1 | Not-determined | Genome-fragment | NA    | 0    |
| S1_k141_379405                               | 8039  | No  | NA | 0  | 3 | Not-determined | Genome-fragment | NA    | 0    |
| S1_k141_136803                               | 1448  | No  | NA | 1  | 0 | Low-quality    | Genome-fragment | 1.02  | 0    |
| S1_k141_337107                               | 1571  | No  | NA | 0  | 1 | Not-determined | Genome-fragment | NA    | 0    |
| S1_k141_1353                                 | 1104  | No  | NA | 0  | 1 | Not-determined | Genome-fragment | NA    | 0    |
| S1_k141_264294                               | 1280  | No  | NA | 0  | 0 | Not-determined | Genome-fragment | NA    | 0    |
| S17-final-viral-combined_k141_127306]]full   | 1448  | No  | NA | 0  | 1 | Low-quality    | Genome-fragment | 3.95  | 0    |
| S1_k141_329973                               | 1314  | No  | NA | 0  | 0 | Not-determined | Genome-fragment | NA    | 0    |
| S17_k141_207728                              | 1448  | No  | NA | 1  | 0 | Low-quality    | Genome-fragment | 1.13  | 0    |
| S1_k141_247964                               | 1056  | No  | NA | 1  | 1 | Not-determined | Genome-fragment | NA    | 0    |
| S17-final-viral-combined_k141_39597]]full    | 1448  | No  | NA | 2  | 0 | Low-quality    | Genome-fragment | 2.94  | 0    |
| S1_k141_363087                               | 2027  | No  | NA | 0  | 2 | Not-determined | Genome-fragment | NA    | 0    |
| S17_k141_125546                              | 1448  | No  | NA | 1  | 0 | Low-quality    | Genome-fragment | 1.5   | 0    |
| S1_k141_140099                               | 1287  | No  | NA | 0  | 1 | Not-determined | Genome-fragment | NA    | 0    |
| S12-final-viral-combined_k141_242906]]full   | 1448  | No  | NA | 1  | 0 | Low-quality    | Genome-fragment | 0.79  | 0    |
| S12_k141_375002                              | 1448  | No  | NA | 1  | 0 | Low-quality    | Genome-fragment | 0.78  | 0    |
| S1_k141_33806                                | 3608  | No  | NA | 0  | 1 | Not-determined | Genome-fragment | NA    | 0    |
| S1_k141_363106                               | 7523  | No  | NA | 0  | 1 | Not-determined | Genome-fragment | NA    | 0    |
| S2-final-viral-combined_k141_196986]]full    | 1448  | No  | NA | 0  | 0 | Low-quality    | Genome-fragment | 2.96  | 0    |
| S4_k141_111661                               | 1448  | No  | NA | 1  | 0 | Low-quality    | Genome-fragment | 1.95  | 0    |
| S1_k141_379465                               | 1196  | No  | NA | 0  | 1 | Not-determined | Genome-fragment | NA    | 0    |
| S1_k141_313751                               | 1654  | No  | NA | 0  | 0 | Not-determined | Genome-fragment | NA    | 0    |
| S1_k141_198678                               | 3895  | No  | NA | 0  | 0 | Not-determined | Genome-fragment | NA    | 0    |
| S1_k141_66072                                | 3948  | No  | NA | 0  | 2 | Not-determined | Genome-fragment | NA    | 0    |
| S1_k141_248067                               | 1604  | No  | NA | 0  | 1 | Not-determined | Genome-fragment | NA    | 0    |
| S1_k141_379498                               | 5113  | No  | NA | 0  | 2 | Not-determined | Genome-fragment | NA    | 0    |
| S8-final-viral-combined_k141_10336]]full     | 1448  | No  | NA | 1  | 0 | Low-quality    | Genome-fragment | 2.87  | 0    |
| S11-final-viral-combined_k141_319881]]full   | 1449  | No  | NA | 0  | 0 | Low-quality    | Genome-fragment | 1.44  | 0    |
| S1_k141_346852                               | 1005  | No  | NA | 0  | 0 | Not-determined | Genome-fragment | NA    | 0    |
| S1_k141_37614                                | 1613  | No  | NA | 0  | 1 | Not-determined | Genome-fragment | NA    | 0    |
| S1_k141_363193                               | 5948  | No  | NA | 0  | 2 | Not-determined | Genome-fragment | NA    | 0    |
| S11-final-viral-combined_k141_160341]]full   | 1449  | Yes | NA | 1  | 1 | Low-quality    | Genome-fragment | 1.92  | 13.8 |
| S11-final-viral-combined_k141_162165]]full   | 1449  | No  | NA | 0  | 0 | Low-quality    | Genome-fragment | 1.03  | 0    |
| S1_k141_37628                                | 1589  | No  | NA | 0  | 0 | Not-determined | Genome-fragment | NA    | 0    |
| S1_k141_116555                               | 2359  | No  | NA | 0  | 0 | Not-determined | Genome-fragment | NA    | 0    |
| S1_k141_248108                               | 1682  | No  | NA | 0  | 1 | Not-determined | Genome-fragment | NA    | 0    |
| S1_k141_50131                                | 3336  | No  | NA | 0  | 2 | Not-determined | Genome-fragment | NA    | 0    |
| S1_k141_363254                               | 1098  | No  | NA | 0  | 1 | Not-determined | Genome-fragment | NA    | 0    |
| S1_k141_50140                                | 1057  | No  | NA | 0  | 0 | Not-determined | Genome-fragment | NA    | 0    |
| S1_k141_281104                               | 1023  | No  | NA | 0  | 1 | Not-determined | Genome-fragment | NA    | 0    |
| S1_k141_363266                               | 3186  | No  | NA | 0  | 1 | Not-determined | Genome-fragment | NA    | 0    |
| S1_k141_165673                               | 1031  | No  | NA | 0  | 1 | Not-determined | Genome-fragment | NA    | 0    |
| S1_k141_17719                                | 3571  | No  | NA | 0  | 1 | Not-determined | Genome-fragment | NA    | 0    |
| S1_k141_281128                               | 1510  | No  | NA | 0  | 0 | Not-determined | Genome-fragment | NA    | 0    |
| S1_k141_34021                                | 1456  | No  | NA | 0  | 2 | Not-determined | Genome-fragment | NA    | 0    |
| S11-final-viral-combined_k141_187745]]H2gene | 1449  | No  | NA | 1  | 0 | Low-quality    | Genome-fragment | 2.12  | 0    |
| S1_k141_354483                               | 1449  | No  | NA | 1  | 0 | Low-quality    | Genome-fragment | 1.29  | 0    |
| S1_k141_379562                               | 4587  | No  | NA | 0  | 2 | Not-determined | Genome-fragment | NA    | 0    |
| S1_k141_264373                               | 1102  | No  | NA | 0  | 0 | Not-determined | Genome-fragment | NA    | 0    |
| S1_k141_330373                               | 1585  | No  | NA | 0  | 1 | Not-determined | Genome-fragment | NA    | 0    |
| S17_k141_141066                              | 1449  | No  | NA | 0  | 0 | Low-quality    | Genome-fragment | 1.65  | 0    |
| S1_k141_83582                                | 1238  | No  | NA | 0  | 1 | Not-determined | Genome-fragment | NA    | 0    |
| S1_k141_198939                               | 1399  | No  | NA | 0  | 2 | Not-determined | Genome-fragment | NA    | 0    |
| S1_k141_165709                               | 1337  | No  | NA | 0  | 0 | Not-determined | Genome-fragment | NA    | 0    |
| S1_k141_264419                               | 11105 | No  | NA | 0  | 7 | Not-determined | Genome-fragment | NA    | 0    |
| S1_k141_313991                               | 11007 | No  | NA | 4  | 0 | Medium-quality | Genome-fragment | 80.73 | 0    |
| S17-final-viral-combined_k141_112600]]full   | 1449  | No  | NA | 0  | 0 | Low-quality    | Genome-fragment | NA    | 0    |
| S1_k141_264426                               | 1298  | No  | NA | 0  | 2 | Not-determined | Genome-fragment | NA    | 0    |
| S17-final-viral-combined_k141_114548]]full   | 1449  | No  | NA | 1  | 0 | Low-quality    | Genome-fragment | 3.37  | 0    |
| S1_k141_24159                                | 1654  | No  | NA | 0  | 1 | Not-determined | Genome-fragment | NA    | 0    |
| S1_k141_379651                               | 1044  | No  | NA | 0  | 0 | Not-determined | Genome-fragment | NA    | 0    |
| S12-final-viral-combined_k141_308675]]full   | 1449  | No  | NA | 2  | 0 | Low-quality    | Genome-fragment | 3.11  | 0    |
| S12_k141_140012                              | 1449  | No  | NA | 0  | 1 | Low-quality    | Genome-fragment | 0.88  | 0    |
| S1_k141_330348                               | 1189  | No  | NA | 0  | 0 | Not-determined | Genome-fragment | NA    | 0    |
| S1_k141_379734                               | 1233  | No  | NA | 0  | 1 | Not-determined | Genome-fragment | NA    | 0    |
| S2_k141_133130                               | 1449  | No  | NA | 2  | 0 | Low-quality    | Genome-fragment | 2.45  | 0    |
| S8-final-viral-combined_k141_71302]]H2gene   | 1449  | No  | NA | 1  | 0 | Low-quality    | Genome-fragment | 1.9   | 0    |
| S1_k141_1775                                 | 4505  | No  | NA | 0  | 7 | Not-determined | Genome-fragment | NA    | 0    |
| S1_k141_34276                                | 1056  | No  | NA | 0  | 1 | Not-determined | Genome-fragment | NA    | 0    |
| S1_k141_297677                               | 1359  | No  | NA | 0  | 2 | Not-determined | Genome-fragment | NA    | 0    |
| S1_k141_182490                               | 2817  | No  | NA | 0  | 1 | Not-determined | Genome-fragment | NA    | 0    |
| S1_k141_363350                               | 1471  | No  | NA | 0  | 0 | Not-determined | Genome-fragment | NA    | 0    |
| S1_k141_363359                               | 1604  | No  | NA | 0  | 0 | Not-determined | Genome-fragment | NA    | 0    |
| S1_k141_66750                                | 1139  | No  | NA | 0  | 0 | Not-determined | Genome-fragment | NA    | 0    |
| S1_k141_83750                                | 1180  | No  | NA | 0  | 0 | Not-determined | Genome-fragment | NA    | 0    |
| S1_k141_182522                               | 1819  | No  | NA | 0  | 0 | Not-determined | Genome-fragment | NA    | 0    |
| S1_k141_136736                               | 2440  | No  | NA | 0  | 1 | Not-determined | Genome-fragment | NA    | 0    |
| S1_k141_314147                               | 4185  | No  | NA | 0  | 1 | Not-determined | Genome-fragment | NA    | 0    |
| S1_k141_116753                               | 1052  | No  | NA | 0  | 2 | Not-determined | Genome-fragment | NA    | 0    |
| S1_k141_231737                               | 2512  | No  | NA | 0  | 0 | Not-determined | Genome-fragment | NA    | 0    |
| S1_k141_165760                               | 1475  | No  | NA | 0  | 1 | Not-determined | Genome-fragment | NA    | 0    |
| S1_k141_363413                               | 1105  | No  | NA | 0  | 1 | Not-determined | Genome-fragment | NA    | 0    |
| S1_k141_148227                               | 6517  | No  | NA | 0  | 1 | Not-determined | Genome-fragment | NA    | 0    |
| S1_k141_314183                               | 1977  | No  | NA | 0  | 1 | Not-determined | Genome-fragment | NA    | 0    |
| S11-final-viral-combined_k141_321116]]full   | 1450  | No  | NA | 0  | 1 | Low-quality    | Genome-fragment | 1.84  | 0    |
| S1_k141_314187                               | 5510  | No  | NA | 0  | 0 | Not-determined | Genome-fragment | NA    | 0    |
| S11-final-viral-combined_k141_223663]]full   | 1450  | No  | NA | 0  | 1 | Low-quality    | Genome-fragment | 1.76  | 0    |
| S1_k141_379883                               | 1020  | No  | NA | 0  | 1 | Not-determined | Genome-fragment | NA    | 0    |
| S1_k141_145474                               | 1246  | No  | NA | 0  | 1 | Not-determined | Genome-fragment | NA    | 0    |
| S1_k141_215661                               | 1388  | No  | NA | 0  | 1 | Not-determined | Genome-fragment | NA    | 0    |
| S1_k141_17967                                | 2605  | No  | NA | 0  | 0 | Not-determined | Genome-fragment | NA    | 0    |
| S17-final-viral-combined_k141_247219]]full   | 1450  | No  | NA | 0  | 0 | Low-quality    | Genome-fragment | 4.35  | 0    |
| S1_k141_100010                               | 45981 | No  | NA | 10 | 0 | High-quality   | Genome-fragment | 100   | 0    |
| S1_k141_379917                               | 1231  | No  | NA | 0  | 0 | Not-determined | Genome-fragment | NA    | 0    |
| S2-final-viral-combined_k141_13826]]full     | 1450  | No  | NA | 0  | 1 | Low-quality    | Genome-fragment | 3.49  | 0    |
| S1_k141_116805                               | 3376  | No  | NA | 0  | 1 | Not-determined | Genome-fragment | NA    | 0    |
| S1_k141_116808                               | 2143  | No  | NA | 0  | 2 | Not-determined | Genome-fragment | NA    | 0    |
| S1_k141_379925                               | 1724  | No  | NA | 0  | 1 | Not-determined | Genome-fragment | NA    | 0    |
| S1_k141_281408                               | 1181  | No  | NA | 0  | 1 | Not-determined | Genome-fragment | NA    | 0    |
| S1_k141_100052                               | 1059  | No  | NA | 0  | 2 | Not-determined | Genome-fragment | NA    | 0    |
| S1_k141_264541                               | 2294  | No  | NA | 0  | 0 | Not-determined | Genome-fragment | NA    | 0    |
| S1_k141_133501                               | 3270  | No  | NA | 0  | 1 | Not-determined | Genome-fragment | NA    | 0    |
| S2_k141_247491                               | 1450  | No  | NA | 0  | 0 | Low-quality    | Genome-fragment | 8.03  | 0    |
| S4-final-viral-combined_k141_86285]]full     | 1450  | No  | NA | 0  | 0 | Low-quality    | Genome-fragment | 3.07  | 0    |
| S1_k141_1974                                 | 4146  | No  | NA | 0  | 2 | Not-determined | Genome-fragment | NA    | 0    |
| S1_k141_281443                               | 3039  | No  | NA | 0  | 1 | Not-determined | Genome-fragment | NA    | 0    |
| S1_k141_281452                               | 1093  | No  | NA | 0  | 0 | Not-determined | Genome-fragment | NA    | 0    |
| S4-final-viral-combined_k141_72035]]H2gene   | 1450  | No  | NA | 0  | 1 | Low-quality    | Genome-fragment | 1.68  | 0    |
| S4_k141_36792                                | 1450  | No  | NA | 0  | 0 | Low-quality    | Genome-fragment | 1.46  | 0    |
| S1_k141_314308                               | 1681  | No  | NA | 0  | 0 | Not-determined | Genome-fragment | NA    | 0    |
| S1_k141_18075                                | 1751  | No  | NA | 0  | 1 | Not-determined | Genome-fragment | NA    | 0    |
| S1_k141_330591                               | 1236  | No  | NA | 0  | 0 | Not-determined | Genome-fragment | NA    | 0    |
| S1_k141_330599                               | 1510  | No  | NA | 0  | 1 | Not-determined | Genome-fragment | NA    | 0    |
| S1_k141_231917                               | 2123  | No  | NA | 0  | 0 | Not-determined | Genome-fragment | NA    | 0    |
| S1_k141_100137                               | 1501  | No  | NA | 0  | 2 | Not-determined | Genome-fragment | NA    | 0    |
| S1_k141_149419                               | 1075  | No  | NA | 0  | 0 | Not-determined | Genome-fragment | NA    | 0    |
| S1_k141_363612                               | 1526  | No  | NA | 0  | 2 | Not-determined | Genome-fragment | NA    | 0    |
| S1_k141_330613                               | 5616  | No  | NA | 0  | 1 | Not-determined | Genome-fragment | NA    | 0    |
| S1_k141_248457                               | 1683  | No  | NA | 0  | 1 | Not-determined | Genome-fragment | NA    | 0    |
| S1_k141_2081                                 | 11897 | No  | NA | 0  | 0 | Not-determined | Genome-fragment | NA    | 0    |
| S1_k141_297985                               | 1036  | No  | NA | 0  | 1 | Not-determined | Genome-fragment | NA    | 0    |
| S1_k141_330669                               | 5062  | No  | NA | 0  | 2 | Not-determined | Genome-fragment | NA    | 0    |
| S1_k141_100205                               | 3115  | No  | NA | 0  | 1 | Not-determined | Genome-fragment | NA    | 0    |
| S1_k141_380049                               | 1070  | No  | NA | 0  |   |                |                 |       |      |



|                                      |       |     |    |    |   |                |                 |    |       |       |
|--------------------------------------|-------|-----|----|----|---|----------------|-----------------|----|-------|-------|
| S1_k141_314455                       | 1823  | No  | NA | 0  | 0 | Not-determined | Genome-fragment | NA | 0     | 0     |
| S9-final-viral-combined_k141_68467   | 1451  | No  | NA | 1  | 0 | Low-quality    | Genome-fragment | NA | 2.39  | 0     |
| S1_k141_100412                       | 3309  | No  | NA | 0  | 0 | Not-determined | Genome-fragment | NA | 0     | 0     |
| S1_k141_67027                        | 2823  | No  | NA | 0  | 2 | Not-determined | Genome-fragment | NA | 0     | 0     |
| S1_k141_134467                       | 1283  | No  | NA | 0  | 1 | Not-determined | Genome-fragment | NA | 0     | 0     |
| S1_k141_264787                       | 1195  | No  | NA | 0  | 1 | Not-determined | Genome-fragment | NA | 0     | 0     |
| S1_k141_363799                       | 8029  | No  | NA | 0  | 3 | Not-determined | Genome-fragment | NA | 0     | 0     |
| S1_k141_18342                        | 1545  | No  | NA | 0  | 1 | Not-determined | Genome-fragment | NA | 0     | 0     |
| S1_k141_155946                       | 3053  | No  | NA | 0  | 1 | Not-determined | Genome-fragment | NA | 0     | 0     |
| S1_k141_145824                       | 1801  | No  | NA | 0  | 1 | Not-determined | Genome-fragment | NA | 0     | 0     |
| S11-final-viral-combined_k141_318046 | 1451  | No  | NA | 0  | 1 | Low-quality    | Genome-fragment | NA | 3.09  | 0     |
| S1_k141_50723                        | 1426  | No  | NA | 0  | 0 | Not-determined | Genome-fragment | NA | 0     | 0     |
| S1_k141_18358                        | 1973  | No  | NA | 0  | 0 | Not-determined | Genome-fragment | NA | 0     | 0     |
| S11-final-viral-combined_k141_162604 | 1451  | No  | NA | 1  | 0 | Low-quality    | Genome-fragment | NA | 4.05  | 0     |
| S1_k141_84213                        | 3808  | No  | NA | 0  | 0 | Not-determined | Genome-fragment | NA | 0     | 0     |
| S1_k141_18362                        | 3772  | No  | NA | 3  | 0 | Not-determined | Genome-fragment | NA | 0     | 0     |
| S1_k141_182975                       | 2938  | No  | NA | 0  | 1 | Not-determined | Genome-fragment | NA | 0     | 0     |
| S1_k141_84236                        | 1069  | No  | NA | 0  | 1 | Not-determined | Genome-fragment | NA | 0     | 0     |
| S1_k141_207242                       | 1451  | No  | NA | 0  | 0 | Low-quality    | Genome-fragment | NA | 1.54  | 0     |
| S1_k141_182981                       | 1496  | No  | NA | 0  | 1 | Not-determined | Genome-fragment | NA | 0     | 0     |
| S1_k141_363880                       | 1131  | No  | NA | 0  | 1 | Not-determined | Genome-fragment | NA | 0     | 0     |
| S1_k141_281789                       | 3129  | No  | NA | 0  | 1 | Not-determined | Genome-fragment | NA | 0     | 0     |
| S3-final-viral-combined_k141_46198   | 1451  | No  | NA | 0  | 1 | Low-quality    | Genome-fragment | NA | 0.84  | 0     |
| S1_k141_216057                       | 1034  | No  | NA | 0  | 0 | Not-determined | Genome-fragment | NA | 0     | 0     |
| S1_k141_347671                       | 1609  | No  | NA | 0  | 0 | Not-determined | Genome-fragment | NA | 0     | 0     |
| S2-final-viral-combined_k141_122040  | 1451  | No  | NA | 3  | 0 | Low-quality    | Genome-fragment | NA | 3.79  | 0     |
| S1_k141_50867                        | 1028  | No  | NA | 0  | 1 | Not-determined | Genome-fragment | NA | 0     | 0     |
| S5_k141_102696                       | 1451  | No  | NA | 1  | 0 | Low-quality    | Genome-fragment | NA | 2.66  | 0     |
| S1_k141_347723                       | 3193  | No  | NA | 0  | 3 | Not-determined | Genome-fragment | NA | 0     | 0     |
| S1_k141_100554                       | 2956  | No  | NA | 0  | 0 | Not-determined | Genome-fragment | NA | 0     | 0     |
| S1_k141_264900                       | 2156  | No  | NA | 0  | 2 | Not-determined | Genome-fragment | NA | 0     | 0     |
| S1_k141_232280                       | 1220  | No  | NA | 1  | 1 | Not-determined | Genome-fragment | NA | 0     | 0     |
| S1_k141_232309                       | 1601  | No  | NA | 0  | 1 | Not-determined | Genome-fragment | NA | 0     | 0     |
| S17-final-viral-combined_k141_176353 | 1451  | No  | NA | 0  | 0 | Low-quality    | Genome-fragment | NA | 1.14  | 0     |
| S12_k141_17531                       | 1451  | Yes | NA | 1  | 1 | Low-quality    | Genome-fragment | NA | 0.61  | 30.12 |
| S2-final-viral-combined_k141_219962  | 1451  | No  | NA | 1  | 0 | Low-quality    | Genome-fragment | NA | 2.42  | 0     |
| S1_k141_34881                        | 3329  | No  | NA | 0  | 0 | Not-determined | Genome-fragment | NA | 0     | 0     |
| S1_k141_380339                       | 1409  | No  | NA | 0  | 2 | Not-determined | Genome-fragment | NA | 0     | 0     |
| S4-final-viral-combined_k141_154216  | 1451  | No  | NA | 0  | 0 | Low-quality    | Genome-fragment | NA | 1.95  | 0     |
| S1_k141_232385                       | 1126  | No  | NA | 0  | 0 | Not-determined | Genome-fragment | NA | 0     | 0     |
| S1_k141_134063                       | 1977  | No  | NA | 0  | 1 | Not-determined | Genome-fragment | NA | 0     | 0     |
| S1_k141_51057                        | 1541  | No  | NA | 0  | 0 | Not-determined | Genome-fragment | NA | 0     | 0     |
| S1_k141_380378                       | 3583  | No  | NA | 0  | 3 | Not-determined | Genome-fragment | NA | 0     | 0     |
| S1_k141_67296                        | 1154  | No  | NA | 0  | 0 | Not-determined | Genome-fragment | NA | 0     | 0     |
| S1_k141_183171                       | 1052  | No  | NA | 0  | 0 | Not-determined | Genome-fragment | NA | 0     | 0     |
| S1_k141_281927                       | 4114  | No  | NA | 0  | 0 | Not-determined | Genome-fragment | NA | 0     | 0     |
| S4-final-viral-combined_k141_87860   | 1451  | No  | NA | 0  | 1 | Low-quality    | Genome-fragment | NA | 0.9   | 0     |
| S4-final-viral-combined_k141_23385   | 1451  | No  | NA | 0  | 0 | Low-quality    | Genome-fragment | NA | 1.44  | 0     |
| S1_k141_298418                       | 4244  | No  | NA | 0  | 3 | Not-determined | Genome-fragment | NA | 0     | 0     |
| S17-final-viral-combined_k141_226377 | 1452  | No  | NA | 1  | 0 | Low-quality    | Genome-fragment | NA | 3.31  | 0     |
| S1_k141_34581                        | 1307  | No  | NA | 0  | 0 | Not-determined | Genome-fragment | NA | 0     | 0     |
| S1_k141_265012                       | 2578  | No  | NA | 0  | 1 | Not-determined | Genome-fragment | NA | 0     | 0     |
| S1_k141_298457                       | 1694  | No  | NA | 0  | 1 | Not-determined | Genome-fragment | NA | 0     | 0     |
| S1_k141_282043                       | 4788  | No  | NA | 0  | 2 | Not-determined | Genome-fragment | NA | 0     | 0     |
| S1_k141_199721                       | 1655  | No  | NA | 0  | 0 | Not-determined | Genome-fragment | NA | 0     | 0     |
| S1_k141_248091                       | 1176  | No  | NA | 0  | 0 | Not-determined | Genome-fragment | NA | 0     | 0     |
| S1_k141_265070                       | 1264  | No  | NA | 0  | 1 | Not-determined | Genome-fragment | NA | 0     | 0     |
| S17_k141_88476                       | 1452  | No  | NA | 1  | 0 | Low-quality    | Genome-fragment | NA | 3.47  | 0     |
| S1_k141_84536                        | 1283  | No  | NA | 0  | 1 | Not-determined | Genome-fragment | NA | 0     | 0     |
| S1_k141_282073                       | 1003  | No  | NA | 0  | 1 | Not-determined | Genome-fragment | NA | 0     | 0     |
| S1_k141_347874                       | 1830  | No  | NA | 0  | 3 | Not-determined | Genome-fragment | NA | 0     | 0     |
| S1_k141_298525                       | 1033  | No  | NA | 0  | 0 | Not-determined | Genome-fragment | NA | 0     | 0     |
| S12-final-viral-combined_k141_137896 | 1452  | No  | NA | 0  | 0 | Low-quality    | Genome-fragment | NA | 3.39  | 0     |
| S1_k141_166290                       | 1550  | No  | NA | 0  | 0 | Not-determined | Genome-fragment | NA | 0     | 0     |
| S2-final-viral-combined_k141_30449   | 1452  | No  | NA | 1  | 0 | Low-quality    | Genome-fragment | NA | 3.85  | 0     |
| S1_k141_347910                       | 2793  | No  | NA | 0  | 0 | Not-determined | Genome-fragment | NA | 0     | 0     |
| S1_k141_380529                       | 1130  | No  | NA | 0  | 0 | Not-determined | Genome-fragment | NA | 0     | 0     |
| S1_k141_364203                       | 2099  | No  | NA | 0  | 0 | Not-determined | Genome-fragment | NA | 0     | 0     |
| S1_k141_84655                        | 1200  | No  | NA | 0  | 0 | Not-determined | Genome-fragment | NA | 0     | 0     |
| S1_k141_183343                       | 1102  | No  | NA | 0  | 0 | Not-determined | Genome-fragment | NA | 0     | 0     |
| S1_k141_331074                       | 1144  | No  | NA | 0  | 0 | Not-determined | Genome-fragment | NA | 0     | 0     |
| S1_k141_282083                       | 2576  | No  | NA | 0  | 0 | Not-determined | Genome-fragment | NA | 0     | 0     |
| S1_k141_232626                       | 1424  | No  | NA | 0  | 1 | Not-determined | Genome-fragment | NA | 0     | 0     |
| S4-final-viral-combined_k141_113593  | 1452  | No  | NA | 0  | 0 | Low-quality    | Genome-fragment | NA | 0.82  | 0     |
| S1_k141_117474                       | 7870  | No  | NA | 0  | 1 | Not-determined | Genome-fragment | NA | 0     | 0     |
| S1_k141_245224                       | 1893  | No  | NA | 0  | 2 | Not-determined | Genome-fragment | NA | 0     | 0     |
| S1_k141_331086                       | 1517  | No  | NA | 0  | 0 | Not-determined | Genome-fragment | NA | 0     | 0     |
| S1_k141_298619                       | 4821  | No  | NA | 0  | 4 | Not-determined | Genome-fragment | NA | 0     | 0     |
| S1_k141_513122                       | 1056  | No  | NA | 0  | 0 | Not-determined | Genome-fragment | NA | 0     | 0     |
| S1_k141_282133                       | 2254  | No  | NA | 0  | 2 | Not-determined | Genome-fragment | NA | 0     | 0     |
| S1_k141_216487                       | 4121  | No  | NA | 0  | 1 | Not-determined | Genome-fragment | NA | 0     | 0     |
| S4-final-viral-combined_k141_166529  | 1452  | No  | NA | 0  | 2 | Low-quality    | Genome-fragment | NA | 0.86  | 0     |
| S1_k141_150207                       | 3054  | No  | NA | 0  | 3 | Not-determined | Genome-fragment | NA | 0     | 0     |
| S1_k141_2669                         | 2193  | No  | NA | 0  | 2 | Not-determined | Genome-fragment | NA | 0     | 0     |
| S1_k141_187104                       | 1024  | No  | NA | 0  | 2 | Not-determined | Genome-fragment | NA | 0     | 0     |
| S6_k141_66044                        | 1452  | No  | NA | 1  | 0 | Low-quality    | Genome-fragment | NA | 0.78  | 0     |
| S1_k141_2699                         | 4456  | No  | NA | 0  | 0 | Not-determined | Genome-fragment | NA | 0     | 0     |
| S1_k141_364312                       | 1342  | No  | NA | 0  | 2 | Not-determined | Genome-fragment | NA | 0     | 0     |
| S6_k141_19555                        | 1452  | No  | NA | 0  | 1 | Low-quality    | Genome-fragment | NA | 0.37  | 0     |
| S1_k141_18714                        | 1477  | No  | NA | 0  | 1 | Not-determined | Genome-fragment | NA | 0     | 0     |
| S1_k141_265274                       | 1099  | No  | NA | 0  | 1 | Not-determined | Genome-fragment | NA | 0     | 0     |
| S1_k141_347176                       | 1413  | No  | NA | 0  | 3 | Not-determined | Genome-fragment | NA | 0     | 0     |
| S8-final-viral-combined_k141_209529  | 1452  | No  | NA | 0  | 0 | Low-quality    | Genome-fragment | NA | 3.23  | 0     |
| S8_k141_103828                       | 1452  | No  | NA | 0  | 0 | Low-quality    | Genome-fragment | NA | 0.68  | 0     |
| S1_k141_100773                       | 12895 | No  | NA | 0  | 6 | Not-determined | Genome-fragment | NA | 0     | 0     |
| S1_k141_216642                       | 7322  | No  | NA | 0  | 2 | Not-determined | Genome-fragment | NA | 0     | 0     |
| S9-final-viral-combined_k141_79931   | 1453  | No  | NA | 0  | 0 | Low-quality    | Genome-fragment | NA | 2.27  | 0     |
| S1_k141_134452                       | 1759  | No  | NA | 0  | 1 | Not-determined | Genome-fragment | NA | 100   | 0     |
| S1_k141_265385                       | 39134 | No  | NA | 24 | 0 | High-quality   | High-quality    | NA | 0     | 0     |
| S1_k141_380711                       | 3410  | No  | NA | 0  | 4 | Not-determined | Genome-fragment | NA | 0     | 0     |
| S1_k141_84826                        | 3675  | No  | NA | 0  | 1 | Not-determined | Genome-fragment | NA | 0     | 0     |
| S1_k141_331162                       | 1379  | No  | NA | 0  | 1 | Not-determined | Genome-fragment | NA | 0     | 0     |
| S1_k141_282238                       | 1263  | No  | NA | 0  | 0 | Not-determined | Genome-fragment | NA | 0     | 0     |
| S1_k141_166470                       | 3116  | No  | NA | 0  | 3 | Not-determined | Genome-fragment | NA | 0     | 0     |
| S1_k141_298799                       | 1111  | No  | NA | 0  | 0 | Not-determined | Genome-fragment | NA | 0     | 0     |
| S1_k141_331173                       | 3080  | No  | NA | 0  | 1 | Not-determined | Genome-fragment | NA | 0     | 0     |
| S1_k141_265308                       | 1106  | No  | NA | 0  | 0 | Not-determined | Genome-fragment | NA | 0     | 0     |
| S1_k141_166490                       | 1680  | No  | NA | 0  | 1 | Not-determined | Genome-fragment | NA | 0     | 0     |
| S1_k141_150361                       | 1375  | No  | NA | 0  | 0 | Not-determined | Genome-fragment | NA | 0     | 0     |
| S1_k141_84890                        | 2597  | No  | NA | 0  | 2 | Not-determined | Genome-fragment | NA | 0     | 0     |
| S1_k141_2845                         | 1130  | No  | NA | 0  | 1 | Not-determined | Genome-fragment | NA | 0     | 0     |
| S9_k141_21474                        | 1453  | No  | NA | 0  | 0 | Low-quality    | Genome-fragment | NA | 2.43  | 0     |
| S1_k141_200044                       | 1216  | No  | NA | 0  | 0 | Not-determined | Genome-fragment | NA | 0     | 0     |
| S1_k141_84931                        | 1377  | No  | NA | 0  | 2 | Not-determined | Genome-fragment | NA | 1.9   | 0     |
| S12-final-viral-combined_k141_35338  | 1453  | No  | NA | 0  | 1 | Low-quality    | Genome-fragment | NA | 2.74  | 0     |
| S11_k141_2200                        | 1453  | No  | NA | 0  | 3 | Not-determined | Genome-fragment | NA | 0     | 0     |
| S1_k141_18826                        | 3555  | No  | NA | 0  | 0 | Low-quality    | Genome-fragment | NA | 3.48  | 0     |
| S16-final-viral-combined_k141_244617 | 1453  | No  | NA | 0  | 1 | Not-determined | Genome-fragment | NA | 0     | 0     |
| S1_k141_216774                       | 1944  | No  | NA | 0  | 1 | Not-determined | Genome-fragment | NA | 0     | 0     |
| S1_k141_380817                       | 1484  | No  | NA | 0  | 1 | Not-determined | Genome-fragment | NA | 0     | 0     |
| S16-final-viral-combined_k141_377520 | 1453  | No  | NA | 0  | 0 | Low-quality    | Genome-fragment | NA | 4.57  | 0     |
| S16-final-viral-combined_k141_387424 | 1453  | No  | NA | 0  | 0 | Low-quality    | Genome-fragment | NA | 3.2   | 0     |
| S1_k141_100919                       | 1292  | No  | NA | 0  | 2 | Not-determined | Genome-fragment | NA | 0     | 0     |
| S1_k141_51467                        | 1735  | No  | NA | 0  | 0 | Not-determined | Genome-fragment | NA | 0     | 0     |
| S1_k141_150484                       | 1261  | No  | NA | 0  | 0 | Not-determined | Genome-fragment | NA | 0     | 0     |
| S1_k141_364542                       | 1934  | No  | NA | 0  | 1 | Not-determined | Genome-fragment | NA | 0     | 0     |
| S1_k141_18884                        | 1272  | No  | NA | 0  | 0 | Not-determined | Genome-fragment | NA | 0     | 0     |
| S1_k141_188626                       | 1044  | No  | NA | 0  | 0 | Not-determined | Genome-fragment | NA | 0     | 0     |
| S1_k141_216827                       | 3124  | No  | NA | 0  | 3 | Not-determined | Genome-fragment | NA | 0     | 0     |
| S17-final-viral-combined_k141_213547 | 1453  | No  | NA | 0  | 0 | Low-quality    | Genome-fragment | NA | 11.46 | 0     |
| S1_k141_51531                        | 3667  | No  | NA | 0  | 1 | Not-determined | Genome-fragment | NA | 0     | 0     |
| S1_k141_265362                       | 1283  | No  | NA | 0  | 0 | Not-determined | Genome-fragment | NA | 0     | 0     |
| S1_k141_134643                       | 1059  | No  | NA | 0  | 1 | Not-determined | Genome-fragment | NA | 0     | 0     |
| S1_k141_67874                        | 1450  | No  | NA | 0  | 2 | Not-determined | Genome-fragment | NA | 0     | 0     |
| S1_k141_51565                        | 5463  | No  | NA | 0  | 3 | Not-determined | Genome-fragment | NA | 0     | 0     |
| S17-final-viral-combined_k141_216708 | 1453  | No  | NA | 1  | 0 | Low-quality    | Genome-fragment | NA | 3.86  | 0     |
| S1_k141_183694                       | 1187  | No  | NA | 0  | 4 | Not-determined | Genome-fragment | NA |       |       |



|                                       |       |     |    |      |   |                |                 |                 |       |
|---------------------------------------|-------|-----|----|------|---|----------------|-----------------|-----------------|-------|
| SL_k141_315574                        | 3599  | No  | NA | 0    | 2 | Not-determined | Genome-fragment | NA              | 0     |
| SL_k141_315578                        | 1104  | No  | NA | 0    | 1 | Not-determined | Genome-fragment | NA              | 0     |
| S4-final-viral-combined_k141_138662   | 1454  | No  | NA | 0    | 0 | Low-quality    | Genome-fragment | NA              | 0.9   |
| SL_k141_282743                        | 1737  | No  | NA | 0    | 1 | Not-determined | Genome-fragment | NA              | 0     |
| S6-final-viral-combined_k141_41527    | 1454  | No  | NA | 0    | 1 | Low-quality    | Genome-fragment | NA              | 0.94  |
| SL_k141_35744                         | 1602  | No  | NA | 0    | 2 | Not-determined | Genome-fragment | NA              | 0     |
| SL_k141_331580                        | 4461  | No  | NA | 0    | 4 | Not-determined | Genome-fragment | NA              | 0     |
| S8-final-viral-combined_k141_135637   | 1454  | Yes | NA | 1260 | 1 | 1              | Low-quality     | Genome-fragment | 1.22  |
| SL_k141_299419                        | 1497  | No  | NA | 0    | 1 | Not-determined | Genome-fragment | NA              | 0     |
| SL_k141_200403                        | 1175  | No  | NA | 0    | 1 | Not-determined | Genome-fragment | NA              | 0     |
| SL_k141_101280                        | 11549 | No  | NA | 0    | 1 | Not-determined | Genome-fragment | NA              | 0     |
| SL_k141_281142                        | 3254  | No  | NA | 0    | 2 | Not-determined | Genome-fragment | NA              | 0     |
| SL_k141_134954                        | 1763  | No  | NA | 0    | 1 | Not-determined | Genome-fragment | NA              | 0     |
| SL_k141_184173                        | 1403  | No  | NA | 0    | 1 | Not-determined | Genome-fragment | NA              | 0     |
| S9-final-viral-combined_k141_55427    | 1455  | No  | NA | 0    | 1 | Low-quality    | Genome-fragment | NA              | 3.76  |
| SL_k141_299455                        | 1358  | No  | NA | 0    | 2 | Not-determined | Genome-fragment | NA              | 0     |
| S9-final-viral-combined_k141_50996    | 1455  | No  | NA | 0    | 0 | Low-quality    | Genome-fragment | NA              | 24.07 |
| S3-final-viral-combined_k141_72261    | 1455  | No  | NA | 0    | 1 | Low-quality    | Genome-fragment | NA              | 1.02  |
| SL_k141_232109                        | 2410  | No  | NA | 0    | 0 | Not-determined | Genome-fragment | NA              | 0     |
| SL_k141_184212                        | 1590  | No  | NA | 0    | 0 | Not-determined | Genome-fragment | NA              | 0     |
| SL_k141_3120                          | 2333  | No  | NA | 0    | 2 | Not-determined | Genome-fragment | NA              | 0     |
| SL_k141_118162                        | 1399  | No  | NA | 0    | 1 | Not-determined | Genome-fragment | NA              | 0     |
| SL_k141_299482                        | 6573  | No  | NA | 0    | 4 | Not-determined | Genome-fragment | NA              | 0     |
| SL_k141_365034                        | 1025  | No  | NA | 0    | 0 | Not-determined | Genome-fragment | NA              | 0     |
| SL_k141_35852                         | 4374  | No  | NA | 0    | 1 | Not-determined | Genome-fragment | NA              | 4.16  |
| S7-final-viral-combined_k141_146633   | 1455  | No  | NA | 0    | 0 | Low-quality    | Genome-fragment | NA              | 0     |
| SL_k141_184235                        | 1102  | No  | NA | 0    | 0 | Not-determined | Genome-fragment | NA              | 0     |
| SL_k141_184236                        | 1315  | No  | NA | 0    | 0 | Not-determined | Genome-fragment | NA              | 0     |
| SL_k141_355063                        | 2173  | No  | NA | 0    | 2 | Not-determined | Genome-fragment | NA              | 0     |
| S7-final-viral-combined_k141_105982   | 1455  | No  | NA | 0    | 2 | Low-quality    | Genome-fragment | NA              | 0.76  |
| SL_k141_315699                        | 1212  | No  | NA | 0    | 0 | Not-determined | Genome-fragment | NA              | 0     |
| S7_k141_25010                         | 1455  | No  | NA | 0    | 1 | Low-quality    | Genome-fragment | NA              | 0.4   |
| S17_k141_189390                       | 1455  | No  | NA | 0    | 0 | Low-quality    | Genome-fragment | NA              | 2.86  |
| SL_k141_184249                        | 1600  | No  | NA | 0    | 1 | Not-determined | Genome-fragment | NA              | 0     |
| S17_k141_218899                       | 1455  | No  | NA | 0    | 0 | Low-quality    | Genome-fragment | NA              | 1.78  |
| SL_k141_200489                        | 7746  | No  | NA | 0    | 0 | Not-determined | Genome-fragment | NA              | 0     |
| S2-final-viral-combined_k141_219098   | 1455  | No  | NA | 0    | 0 | Low-quality    | Genome-fragment | NA              | 2.7   |
| SL_k141_282869                        | 1406  | No  | NA | 0    | 0 | Not-determined | Genome-fragment | NA              | 0     |
| SL_k141_248764                        | 4484  | No  | NA | 0    | 4 | Not-determined | Genome-fragment | NA              | 0     |
| SL_k141_166857                        | 2060  | No  | NA | 0    | 1 | Not-determined | Genome-fragment | NA              | 0     |
| SL_k141_217265                        | 6420  | No  | NA | 0    | 4 | Not-determined | Genome-fragment | NA              | 0     |
| SL_k141_52061                         | 2024  | No  | NA | 0    | 2 | Not-determined | Genome-fragment | NA              | 0     |
| S2-final-viral-combined_k141_163891   | 1455  | No  | NA | 0    | 0 | Low-quality    | Genome-fragment | NA              | 3.01  |
| S8-final-viral-combined_k141_245448   | 1455  | No  | NA | 0    | 0 | Low-quality    | Genome-fragment | NA              | 3.34  |
| SL_k141_265870                        | 4535  | No  | NA | 0    | 4 | Not-determined | Genome-fragment | NA              | 0     |
| SL11-final-viral-combined_k141_69208  | 1456  | No  | NA | 0    | 1 | Low-quality    | Genome-fragment | NA              | 4.65  |
| SL11-final-viral-combined_k141_108853 | 1456  | No  | NA | 1    | 0 | Low-quality    | Genome-fragment | NA              | 0.9   |
| SL_k141_233385                        | 3681  | No  | NA | 0    | 2 | Not-determined | Genome-fragment | NA              | 0     |
| SL_k141_118297                        | 1107  | No  | NA | 0    | 2 | Not-determined | Genome-fragment | NA              | 0     |
| SL_k141_331873                        | 3627  | No  | NA | 0    | 2 | Not-determined | Genome-fragment | NA              | 0     |
| SL_k141_265905                        | 1094  | No  | NA | 0    | 1 | Not-determined | Genome-fragment | NA              | 0     |
| SL_k141_200564                        | 1440  | No  | NA | 0    | 2 | Not-determined | Genome-fragment | NA              | 0     |
| S1-final-viral-combined_k141_121334   | 1456  | No  | NA | 0    | 0 | Low-quality    | Genome-fragment | NA              | 3.02  |
| SL_k141_135202                        | 1905  | No  | NA | 0    | 1 | Not-determined | Genome-fragment | NA              | 0     |
| S3-final-viral-combined_k141_52734    | 1456  | No  | NA | 1    | 0 | Low-quality    | Genome-fragment | NA              | 3.09  |
| SL_k141_118384                        | 1346  | No  | NA | 0    | 0 | Not-determined | Genome-fragment | NA              | 0     |
| SL_k141_151125                        | 1530  | No  | NA | 0    | 2 | Not-determined | Genome-fragment | NA              | 0     |
| SL_k141_52154                         | 1298  | No  | NA | 0    | 0 | Not-determined | Genome-fragment | NA              | 0     |
| SL_k141_151901                        | 2168  | No  | NA | 0    | 1 | Not-determined | Genome-fragment | NA              | 0     |
| SL_k141_118391                        | 1275  | No  | NA | 0    | 1 | Not-determined | Genome-fragment | NA              | 0     |
| SL_k141_381436                        | 1173  | No  | NA | 0    | 0 | Not-determined | Genome-fragment | NA              | 0     |
| SL_k141_331935                        | 3644  | No  | NA | 0    | 0 | Not-determined | Genome-fragment | NA              | 0     |
| SL2_k141_184196                       | 1456  | No  | NA | 0    | 1 | Low-quality    | Genome-fragment | NA              | 0.74  |
| SL_k141_217470                        | 7997  | No  | NA | 0    | 1 | Not-determined | Genome-fragment | NA              | 0     |
| SL_k141_85381                         | 1267  | No  | NA | 0    | 1 | Not-determined | Genome-fragment | NA              | 0     |
| SL_k141_52234                         | 1618  | No  | NA | 0    | 1 | Not-determined | Genome-fragment | NA              | 0     |
| SL_k141_283070                        | 2049  | No  | NA | 0    | 0 | Not-determined | Genome-fragment | NA              | 0     |
| SL_k141_250266                        | 1047  | No  | NA | 0    | 1 | Not-determined | Genome-fragment | NA              | 0     |
| SL_k141_52105                         | 1314  | No  | NA | 0    | 0 | Not-determined | Genome-fragment | NA              | 0     |
| S2-final-viral-combined_k141_142108   | 1456  | No  | NA | 0    | 0 | Low-quality    | Genome-fragment | NA              | 1.14  |
| SL_k141_52314                         | 2187  | No  | NA | 0    | 3 | Not-determined | Genome-fragment | NA              | 0     |
| SL_k141_266208                        | 3587  | No  | NA | 0    | 2 | Not-determined | Genome-fragment | NA              | 0     |
| SL_k141_381523                        | 1531  | No  | NA | 0    | 1 | Not-determined | Genome-fragment | NA              | 0     |
| SL_k141_118552                        | 2074  | No  | NA | 0    | 5 | Not-determined | Genome-fragment | NA              | 0     |
| SL_k141_167168                        | 1159  | No  | NA | 0    | 1 | Not-determined | Genome-fragment | NA              | 0     |
| SL_k141_283139                        | 4712  | No  | NA | 0    | 0 | Not-determined | Genome-fragment | NA              | 0     |
| SL_k141_151295                        | 1012  | No  | NA | 0    | 1 | Not-determined | Genome-fragment | NA              | 0     |
| SL_k141_299787                        | 1337  | No  | NA | 0    | 1 | Not-determined | Genome-fragment | NA              | 0     |
| SL_k141_184366                        | 1432  | No  | NA | 0    | 1 | Not-determined | Genome-fragment | NA              | 0     |
| SL_k141_36257                         | 1275  | No  | NA | 0    | 0 | Not-determined | Genome-fragment | NA              | 0     |
| SL_k141_266051                        | 3974  | No  | NA | 0    | 0 | Not-determined | Genome-fragment | NA              | 0     |
| SL_k141_250118                        | 1554  | No  | NA | 0    | 0 | Not-determined | Genome-fragment | NA              | 0     |
| SL_k141_283179                        | 1175  | No  | NA | 0    | 1 | Not-determined | Genome-fragment | NA              | 0     |
| S6-final-viral-combined_k141_57036    | 1456  | No  | NA | 0    | 0 | Low-quality    | Genome-fragment | NA              | 3.41  |
| SL_k141_68505                         | 6935  | No  | NA | 0    | 0 | Not-determined | Genome-fragment | NA              | 0     |
| SL11-final-viral-combined_k141_29467  | 1457  | No  | NA | 0    | 0 | Low-quality    | Genome-fragment | NA              | 3.72  |
| SL_k141_68526                         | 1251  | No  | NA | 0    | 2 | Not-determined | Genome-fragment | NA              | 0     |
| SL_k141_101632                        | 1330  | No  | NA | 0    | 1 | Not-determined | Genome-fragment | NA              | 0     |
| S1-final-viral-combined_k141_99541    | 1457  | No  | NA | 0    | 1 | Low-quality    | Genome-fragment | NA              | 1.05  |
| SL_k141_101635                        | 1033  | No  | NA | 0    | 0 | Not-determined | Genome-fragment | NA              | 0     |
| SL_k141_151389                        | 1789  | No  | NA | 0    | 4 | Not-determined | Genome-fragment | NA              | 0     |
| S1-final-viral-combined_k141_323644   | 1457  | No  | NA | 4    | 0 | Low-quality    | Genome-fragment | NA              | 3.43  |
| SL_k141_266226                        | 1489  | No  | NA | 0    | 0 | Not-determined | Genome-fragment | NA              | 0     |
| SL_k141_200857                        | 5149  | No  | NA | 0    | 5 | Not-determined | Genome-fragment | NA              | 0     |
| SL_k141_200890                        | 1329  | No  | NA | 0    | 0 | Not-determined | Genome-fragment | NA              | 0     |
| S7-final-viral-combined_k141_71380    | 1457  | No  | NA | 0    | 2 | Low-quality    | Genome-fragment | NA              | 1.57  |
| SL12-final-viral-combined_k141_102677 | 1457  | No  | NA | 0    | 0 | Low-quality    | Genome-fragment | NA              | 1.16  |
| SL_k141_266278                        | 1268  | No  | NA | 0    | 2 | Not-determined | Genome-fragment | NA              | 0     |
| SL_k141_200923                        | 1910  | No  | NA | 0    | 1 | Not-determined | Genome-fragment | NA              | 0     |
| SL_k141_266289                        | 1192  | No  | NA | 0    | 0 | Not-determined | Genome-fragment | NA              | 0     |
| SL_k141_381734                        | 1338  | No  | NA | 0    | 1 | Not-determined | Genome-fragment | NA              | 0     |
| SL_k141_68607                         | 1607  | No  | NA | 0    | 0 | Not-determined | Genome-fragment | NA              | 0     |
| S12-final-viral-combined_k141_220303  | 1457  | No  | NA | 0    | 1 | Low-quality    | Genome-fragment | NA              | 0.63  |
| SL_k141_85577                         | 1591  | No  | NA | 0    | 1 | Not-determined | Genome-fragment | NA              | 0     |
| SL_k141_248160                        | 1215  | No  | NA | 0    | 2 | Not-determined | Genome-fragment | NA              | 0     |
| SL12_k141_192967                      | 1457  | No  | NA | 1    | 0 | Low-quality    | Genome-fragment | NA              | 0.79  |
| S9-final-viral-combined_k141_26573    | 1458  | No  | NA | 4    | 0 | Low-quality    | Genome-fragment | NA              | 3.5   |
| SL_k141_167311                        | 9702  | No  | NA | 0    | 6 | Not-determined | Genome-fragment | NA              | 0     |
| SL_k141_365621                        | 1092  | No  | NA | 0    | 0 | Not-determined | Genome-fragment | NA              | 0     |
| SL_k141_184868                        | 2362  | No  | NA | 0    | 0 | Not-determined | Genome-fragment | NA              | 0     |
| S9_k141_34362                         | 1458  | No  | NA | 2    | 0 | Low-quality    | Genome-fragment | NA              | 2.61  |
| SL11-final-viral-combined_k141_227607 | 1458  | No  | NA | 1    | 0 | Low-quality    | Genome-fragment | NA              | 2.63  |
| SL_k141_135652                        | 1160  | No  | NA | 0    | 1 | Not-determined | Genome-fragment | NA              | 0     |
| SL_k141_151630                        | 2805  | No  | NA | 0    | 0 | Not-determined | Genome-fragment | NA              | 0     |
| S1-final-viral-combined_k141_313743   | 1458  | No  | NA | 1    | 0 | Low-quality    | Genome-fragment | NA              | 3.6   |
| SL_k141_52521                         | 1338  | No  | NA | 0    | 0 | Not-determined | Genome-fragment | NA              | 0     |
| SL_k141_167371                        | 1025  | No  | NA | 0    | 1 | Not-determined | Genome-fragment | NA              | 0     |
| SL_k141_265640                        | 1620  | No  | NA | 0    | 3 | Not-determined | Genome-fragment | NA              | 0     |
| SL_k141_525138                        | 1012  | No  | NA | 0    | 0 | Not-determined | Genome-fragment | NA              | 0     |
| S1-final-viral-combined_k141_188532   | 1458  | No  | NA | 0    | 1 | Low-quality    | Genome-fragment | NA              | 3.52  |
| SL_k141_283403                        | 4574  | No  | NA | 0    | 1 | Not-determined | Genome-fragment | NA              | 0     |
| SL_k141_201009                        | 1109  | No  | NA | 0    | 0 | Not-determined | Genome-fragment | NA              | 0     |
| SL_k141_19946                         | 1206  | No  | NA | 0    | 1 | Not-determined | Genome-fragment | NA              | 0     |
| SL_k141_184905                        | 3195  | No  | NA | 0    | 2 | Not-determined | Genome-fragment | NA              | 0     |
| SL_k141_216417                        | 1145  | No  | NA | 0    | 2 | Not-determined | Genome-fragment | NA              | 0     |
| S1-final-viral-combined_k141_44035    | 1458  | No  | NA | 1    | 0 | Low-quality    | Genome-fragment | NA              | 3.82  |
| SL_k141_36486                         | 1103  | No  | NA | 0    | 0 | Not-determined | Genome-fragment | NA              | 0     |
| S17-final-viral-combined_k141_188786  | 1458  | No  | NA | 0    | 1 | Low-quality    | Genome-fragment | NA              | 1.17  |
| SL_k141_266500                        | 4818  | No  | NA | 0    | 5 | Not-determined | Genome-fragment | NA              | 0     |
| SL_k141_266510                        | 1026  | No  | NA | 0    | 1 | Not-determined | Genome-fragment | NA              | 0     |
| SL_k141_85698                         | 7226  | No  | NA | 0    | 4 | Not-determined | Genome-fragment | NA              | 0     |
| SL_k141_283468                        | 1456  | No  | NA | 0    | 0 | Not-determined | Genome-fragment | NA              | 0     |
| SL_k141_52608                         | 3408  | No  | NA | 0    | 3 | Not-determined | Genome-fragment | NA              | 0     |
| SL_k141_85717                         | 1653  | No  | NA | 0    | 0 | Not-determined | Genome-fragment | NA              | 0     |
| SL_k141_135692                        | 6092  | No  | NA | 0    | 7 | Not-determined | Genome-fragment | NA              | 0     |
| SL_k141_85727                         | 1106  | No  | NA | 0    | 2 | Not-determined | Genome-fragment | NA              | 0     |
| SL_k141_381907                        | 1011  | No  | NA | 0    | 0 | Not-determined | Genome-fragment | NA              | 0     |
| SL_k141_349276                        | 3120  | No  | NA | 0    | 1 | Not-determined | Genome-fragment | NA              | 0     |
| SL_k141_185014                        | 1915  | No  | NA | 0    | 0 | Not-determined | Genome-fragment | NA              | 0     |
| SL12_k141_189780                      | 1458  | No  | NA | 1    | 0 | Low-quality    | Genome-fragment | NA              | 1.54  |
| S2-final-viral-combined_k141_178421   | 1458  | No  | NA | 0    | 0 | Low-quality    | Genome-fragment | NA              | 2.7   |
| SL_k141_233994                        | 4409  | No  | NA | 0    | 0 | Not-determined | Genome-fragment | NA              | 0     |
| SL_k141_332409                        | 3011  | No  | NA | 0    | 1 | Not-determined | Genome-fragment | NA              | 0     |
| SL_k141_101929                        | 1176  | No  | NA | 0    | 1 | Not-determined | Genome-fragment | NA              | 0     |
| SL_k141_234010                        | 1587  | No  | NA | 0    | 2 | Not-determined | Genome-fragment | NA              | 0     |
| SL_k141_332422                        | 2836  | No  | NA | 0    | 3 | Not-determined | Genome-fragment | NA              | 0     |



|                                       |       |    |    |    |    |                |                 |       |   |
|---------------------------------------|-------|----|----|----|----|----------------|-----------------|-------|---|
| SI_k141_85890                         | 1117  | No | NA | 0  | 1  | Not-determined | Genome-fragment | NA    | 0 |
| SI_k141_300504                        | 1187  | No | NA | 0  | 2  | Not-determined | Genome-fragment | NA    | 0 |
| SI_k141_104818                        | 1459  | No | NA | 0  | 0  | Low-quality    | Genome-fragment | 2.13  | 0 |
| SI_k141_310340                        | 1460  | No | NA | 0  | 1  | Low-quality    | Genome-fragment | 2.87  | 0 |
| SI_k141_19352                         | 1460  | No | NA | 0  | 0  | Low-quality    | Genome-fragment | 2.93  | 0 |
| SI_k141_217774                        | 2073  | No | NA | 0  | 0  | Not-determined | Genome-fragment | NA    | 0 |
| SI_k141_52922                         | 1223  | No | NA | 0  | 1  | Not-determined | Genome-fragment | NA    | 0 |
| SI_k141_135974                        | 1048  | No | NA | 0  | 1  | Not-determined | Genome-fragment | NA    | 0 |
| SI_k141_63937                         | 1460  | No | NA | 0  | 0  | Low-quality    | Genome-fragment | 2.64  | 0 |
| SI_k141_217819                        | 1389  | No | NA | 0  | 0  | Not-determined | Genome-fragment | NA    | 0 |
| SI_k141_185265                        | 11712 | No | NA | 0  | 4  | Not-determined | Genome-fragment | NA    | 0 |
| SI_k141_102124                        | 1261  | No | NA | 0  | 1  | Not-determined | Genome-fragment | NA    | 0 |
| SI_k141_85598                         | 3338  | No | NA | 0  | 2  | Not-determined | Genome-fragment | NA    | 0 |
| SI_k141_349540                        | 1080  | No | NA | 0  | 1  | Not-determined | Genome-fragment | NA    | 0 |
| SI_k141_152303                        | 1380  | No | NA | 0  | 1  | Not-determined | Genome-fragment | NA    | 0 |
| SI_k141_111255                        | 1460  | No | NA | 0  | 0  | Low-quality    | Genome-fragment | 1.64  | 0 |
| SI_k141_349544                        | 1126  | No | NA | 0  | 0  | Not-determined | Genome-fragment | NA    | 0 |
| SI_k141_365799                        | 1550  | No | NA | 0  | 1  | Not-determined | Genome-fragment | NA    | 0 |
| SI_k141_180484                        | 1460  | No | NA | 0  | 1  | Low-quality    | Genome-fragment | 1.56  | 0 |
| SI_k141_217850                        | 1054  | No | NA | 0  | 1  | Not-determined | Genome-fragment | NA    | 0 |
| SI_k141_36582                         | 1525  | No | NA | 0  | 0  | Not-determined | Genome-fragment | NA    | 0 |
| SI_k141_365806                        | 1487  | No | NA | 0  | 1  | Not-determined | Genome-fragment | NA    | 0 |
| SI2-final-viral-combined_k141_382642  | 1460  | No | NA | 0  | 0  | Low-quality    | Genome-fragment | 3.43  | 0 |
| SI2-final-viral-combined_k141_148869  | 1460  | No | NA | 0  | 1  | Low-quality    | Genome-fragment | 0.74  | 0 |
| SI_k141_53006                         | 4438  | No | NA | 0  | 11 | Not-determined | Genome-fragment | NA    | 0 |
| SI_k141_36621                         | 3463  | No | NA | 0  | 0  | Not-determined | Genome-fragment | NA    | 0 |
| SI2-final-viral-combined_k141_34333   | 1460  | No | NA | 1  | 0  | Low-quality    | Genome-fragment | 2.46  | 0 |
| SI2-final-viral-combined_k141_157787  | 1460  | No | NA | 3  | 0  | Low-quality    | Genome-fragment | 4.18  | 0 |
| SI_k141_68926                         | 1168  | No | NA | 0  | 1  | Not-determined | Genome-fragment | NA    | 0 |
| SI_k141_201544                        | 2005  | No | NA | 0  | 0  | Not-determined | Genome-fragment | NA    | 0 |
| SI_k141_185395                        | 3594  | No | NA | 0  | 4  | Not-determined | Genome-fragment | NA    | 0 |
| SI_k141_251246                        | 1024  | No | NA | 0  | 2  | Not-determined | Genome-fragment | NA    | 0 |
| SI_k141_86082                         | 1161  | No | NA | 0  | 1  | Not-determined | Genome-fragment | NA    | 0 |
| SI_k141_68980                         | 2234  | No | NA | 0  | 1  | Not-determined | Genome-fragment | NA    | 0 |
| SI2-final-viral-combined_k141_218555  | 1460  | No | NA | 0  | 0  | Low-quality    | Genome-fragment | 0.99  | 0 |
| SI2-final-viral-combined_k141_59696   | 1460  | No | NA | 0  | 0  | Low-quality    | Genome-fragment | 3.02  | 0 |
| SI8-final-viral-combined_k141_82017   | 1460  | No | NA | 0  | 0  | Low-quality    | Genome-fragment | 2.57  | 0 |
| SI11-final-viral-combined_k141_15646  | 1461  | No | NA | 1  | 0  | Low-quality    | Genome-fragment | 2.64  | 0 |
| SI_k141_349728                        | 1024  | No | NA | 0  | 0  | Not-determined | Genome-fragment | NA    | 0 |
| SI_k141_20467                         | 3988  | No | NA | 0  | 0  | Not-determined | Genome-fragment | NA    | 0 |
| SI_k141_283882                        | 1223  | No | NA | 0  | 0  | Not-determined | Genome-fragment | NA    | 0 |
| SI_k141_185489                        | 4074  | No | NA | 0  | 1  | Not-determined | Genome-fragment | NA    | 0 |
| SI_k141_201641                        | 3597  | No | NA | 0  | 1  | Not-determined | Genome-fragment | NA    | 0 |
| SI_k141_317129                        | 3268  | No | NA | 0  | 3  | Not-determined | Genome-fragment | NA    | 0 |
| SI_k141_234465                        | 1037  | No | NA | 0  | 1  | Not-determined | Genome-fragment | NA    | 0 |
| SI_k141_317134                        | 1507  | No | NA | 0  | 1  | Not-determined | Genome-fragment | NA    | 0 |
| SI_k141_283925                        | 3005  | No | NA | 0  | 2  | Not-determined | Genome-fragment | NA    | 0 |
| SI2-final-viral-combined_k141_159306  | 1461  | No | NA | 0  | 1  | Low-quality    | Genome-fragment | 2.53  | 0 |
| SI_k141_300716                        | 1379  | No | NA | 0  | 1  | Not-determined | Genome-fragment | NA    | 0 |
| SI_k141_165774                        | 1461  | No | NA | 0  | 1  | Low-quality    | Genome-fragment | 0.84  | 0 |
| SI7-final-viral-combined_k141_86304   | 1461  | No | NA | 0  | 1  | Low-quality    | Genome-fragment | 1.21  | 0 |
| SI_k141_26778                         | 2536  | No | NA | 0  | 1  | Not-determined | Genome-fragment | NA    | 0 |
| SI_k141_365974                        | 1639  | No | NA | 0  | 1  | Not-determined | Genome-fragment | NA    | 0 |
| SI_k141_382330                        | 1081  | No | NA | 0  | 1  | Not-determined | Genome-fragment | NA    | 0 |
| SI_k141_20539                         | 1028  | No | NA | 0  | 2  | Not-determined | Genome-fragment | NA    | 0 |
| SI_k141_267188                        | 1466  | No | NA | 0  | 1  | Not-determined | Genome-fragment | NA    | 0 |
| SI7-final-viral-combined_k141_161285  | 1461  | No | NA | 1  | 0  | Low-quality    | Genome-fragment | 2.52  | 0 |
| SI_k141_332917                        | 1129  | No | NA | 0  | 0  | Not-determined | Genome-fragment | NA    | 0 |
| SI_k141_185962                        | 1016  | No | NA | 0  | 1  | Not-determined | Genome-fragment | NA    | 0 |
| SI_k141_152143                        | 1153  | No | NA | 0  | 0  | Not-determined | Genome-fragment | NA    | 0 |
| SI_k141_152153                        | 1375  | No | NA | 0  | 2  | Not-determined | Genome-fragment | NA    | 0 |
| SI_k141_349510                        | 1144  | No | NA | 0  | 0  | Not-determined | Genome-fragment | NA    | 0 |
| SI_k141_152170                        | 3313  | No | NA | 0  | 1  | Not-determined | Genome-fragment | NA    | 0 |
| SI2_k141_115581                       | 1461  | No | NA | 0  | 0  | Low-quality    | Genome-fragment | 0.25  | 0 |
| SI_k141_152179                        | 1498  | No | NA | 0  | 1  | Not-determined | Genome-fragment | NA    | 0 |
| SI_k141_300846                        | 1138  | No | NA | 0  | 1  | Not-determined | Genome-fragment | NA    | 0 |
| SI9-final-viral-combined_k141_36940   | 1462  | No | NA | 0  | 0  | Low-quality    | Genome-fragment | 1.77  | 0 |
| SI_k141_251477                        | 1520  | No | NA | 0  | 0  | Not-determined | Genome-fragment | NA    | 0 |
| SI_k141_332973                        | 1406  | No | NA | 0  | 0  | Not-determined | Genome-fragment | NA    | 0 |
| SI_k141_332982                        | 3498  | No | NA | 0  | 1  | Not-determined | Genome-fragment | NA    | 0 |
| SI_k141_349596                        | 1180  | No | NA | 0  | 1  | Not-determined | Genome-fragment | NA    | 0 |
| SI_k141_218112                        | 2429  | No | NA | 0  | 2  | Not-determined | Genome-fragment | NA    | 0 |
| SI_k141_119545                        | 2926  | No | NA | 0  | 2  | Not-determined | Genome-fragment | NA    | 0 |
| SI_k141_167983                        | 4055  | No | NA | 0  | 3  | Not-determined | Genome-fragment | NA    | 0 |
| SI_k141_102342                        | 7994  | No | NA | 20 | 4  | Medium-quality | Genome-fragment | 58.02 | 0 |
| SI_k141_218148                        | 1738  | No | NA | 0  | 0  | Not-determined | Genome-fragment | NA    | 0 |
| SI_k141_36928                         | 1067  | No | NA | 0  | 2  | Not-determined | Genome-fragment | NA    | 0 |
| SI_k141_366116                        | 4705  | No | NA | 0  | 2  | Not-determined | Genome-fragment | NA    | 0 |
| SI_k141_36932                         | 1006  | No | NA | 0  | 0  | Not-determined | Genome-fragment | NA    | 0 |
| SI_k141_86210                         | 1807  | No | NA | 0  | 0  | Not-determined | Genome-fragment | NA    | 0 |
| SI_k141_350011                        | 1045  | No | NA | 0  | 0  | Not-determined | Genome-fragment | NA    | 0 |
| SI11-final-viral-combined_k141_229040 | 1462  | No | NA | 0  | 1  | Low-quality    | Genome-fragment | 1.9   | 0 |
| SI11-final-viral-combined_k141_215961 | 1462  | No | NA | 0  | 0  | Low-quality    | Genome-fragment | 3.5   | 0 |
| SI_k141_119607                        | 1160  | No | NA | 0  | 2  | Not-determined | Genome-fragment | NA    | 0 |
| SI11-final-viral-combined_k141_325553 | 1462  | No | NA | 0  | 0  | Low-quality    | Genome-fragment | 0.95  | 0 |
| SI_k141_36959                         | 1002  | No | NA | 0  | 2  | Not-determined | Genome-fragment | NA    | 0 |
| SI_k141_152303                        | 1761  | No | NA | 0  | 0  | Not-determined | Genome-fragment | NA    | 0 |
| SI_k141_185886                        | 1007  | No | NA | 0  | 0  | Not-determined | Genome-fragment | NA    | 0 |
| SI_k141_301017                        | 1000  | No | NA | 0  | 0  | Not-determined | Genome-fragment | NA    | 0 |
| SI1-final-viral-combined_k141_89367   | 1462  | No | NA | 0  | 0  | Low-quality    | Genome-fragment | 0.5   | 0 |
| SI_k141_267383                        | 1115  | No | NA | 0  | 2  | Not-determined | Genome-fragment | NA    | 0 |
| SI7-final-viral-combined_k141_307991  | 1462  | No | NA | 2  | 0  | Low-quality    | Genome-fragment | 3.33  | 0 |
| SI_k141_119568                        | 5080  | No | NA | 0  | 3  | Not-determined | Genome-fragment | NA    | 0 |
| SI_k141_20724                         | 1470  | No | NA | 0  | 1  | Not-determined | Genome-fragment | NA    | 0 |
| SI_k141_102422                        | 1721  | No | NA | 0  | 2  | Not-determined | Genome-fragment | NA    | 0 |
| SI_k141_136283                        | 1663  | No | NA | 0  | 2  | Not-determined | Genome-fragment | NA    | 0 |
| SI_k141_317295                        | 1849  | No | NA | 0  | 2  | Not-determined | Genome-fragment | NA    | 0 |
| SI_k141_366216                        | 1352  | No | NA | 0  | 1  | Not-determined | Genome-fragment | NA    | 0 |
| SI_k141_317309                        | 6300  | No | NA | 0  | 1  | Not-determined | Genome-fragment | NA    | 0 |
| SI_k141_234637                        | 1797  | No | NA | 0  | 3  | Not-determined | Genome-fragment | NA    | 0 |
| SI_k141_333166                        | 1168  | No | NA | 0  | 0  | Not-determined | Genome-fragment | NA    | 0 |
| SI_k141_37050                         | 1317  | No | NA | 0  | 1  | Not-determined | Genome-fragment | NA    | 0 |
| SI_k141_152347                        | 2026  | No | NA | 0  | 0  | Not-determined | Genome-fragment | NA    | 0 |
| SI_k141_102483                        | 9764  | No | NA | 0  | 2  | Not-determined | Genome-fragment | NA    | 0 |
| SI_k141_69195                         | 4476  | No | NA | 0  | 0  | Not-determined | Genome-fragment | NA    | 0 |
| SI7_k141_209053                       | 1462  | No | NA | 0  | 0  | Low-quality    | Genome-fragment | 2.41  | 0 |
| SI_k141_382563                        | 1750  | No | NA | 0  | 1  | Not-determined | Genome-fragment | NA    | 0 |
| SI_k141_69203                         | 7419  | No | NA | 0  | 3  | Not-determined | Genome-fragment | NA    | 0 |
| SI_k141_4131                          | 1646  | No | NA | 0  | 0  | Not-determined | Genome-fragment | NA    | 0 |
| SI_k141_136383                        | 4193  | No | NA | 0  | 0  | Not-determined | Genome-fragment | NA    | 0 |
| SI_k141_382582                        | 1948  | No | NA | 0  | 2  | Not-determined | Genome-fragment | NA    | 0 |
| SI2-final-viral-combined_k141_8598    | 1462  | No | NA | 0  | 1  | Low-quality    | Genome-fragment | 1.9   | 0 |
| SI_k141_14074                         | 1462  | No | NA | 0  | 0  | Low-quality    | Genome-fragment | 0.99  | 0 |
| SI_k141_37125                         | 1303  | No | NA | 0  | 1  | Not-determined | Genome-fragment | NA    | 0 |
| SI6-final-viral-combined_k141_113942  | 1462  | No | NA | 0  | 1  | Low-quality    | Genome-fragment | 1.04  | 0 |
| SI_k141_350231                        | 1921  | No | NA | 0  | 2  | Not-determined | Genome-fragment | NA    | 0 |
| SI_k141_168183                        | 1025  | No | NA | 0  | 1  | Not-determined | Genome-fragment | NA    | 0 |
| SI_k141_201990                        | 3869  | No | NA | 0  | 2  | Not-determined | Genome-fragment | NA    | 0 |
| SI_k141_381610                        | 1299  | No | NA | 0  | 1  | Not-determined | Genome-fragment | NA    | 0 |
| SI_k141_75354                         | 1462  | No | NA | 0  | 0  | Low-quality    | Genome-fragment | 0.96  | 0 |
| SI_k141_53441                         | 3677  | No | NA | 0  | 2  | Not-determined | Genome-fragment | NA    | 0 |
| SI_k141_317472                        | 1112  | No | NA | 0  | 1  | Not-determined | Genome-fragment | NA    | 0 |
| SI_k141_382624                        | 1036  | No | NA | 0  | 1  | Not-determined | Genome-fragment | NA    | 0 |
| SI_k141_251749                        | 4007  | No | NA | 0  | 0  | Not-determined | Genome-fragment | NA    | 0 |
| SI_k141_217475                        | 1669  | No | NA | 0  | 1  | Not-determined | Genome-fragment | NA    | 0 |
| SI_k141_37184                         | 1326  | No | NA | 0  | 0  | Not-determined | Genome-fragment | NA    | 0 |
| SI_k141_53474                         | 1580  | No | NA | 0  | 1  | Not-determined | Genome-fragment | NA    | 0 |
| SI_k141_119887                        | 1085  | No | NA | 0  | 0  | Not-determined | Genome-fragment | NA    | 0 |
| SI5-final-viral-combined_k141_143301  | 1463  | No | NA | 0  | 0  | Low-quality    | Genome-fragment | 2.28  | 0 |
| SI_k141_69266                         | 3067  | No | NA | 0  | 0  | Not-determined | Genome-fragment | NA    | 0 |
| SI_k141_168270                        | 1355  | No | NA | 0  | 1  | Not-determined | Genome-fragment | NA    | 0 |
| SI_k141_301389                        | 5492  | No | NA | 0  | 1  | Not-determined | Genome-fragment | NA    | 0 |
| SI7-final-viral-combined_k141_218195  | 1463  | No | NA | 0  | 1  | Low-quality    | Genome-fragment | 2.45  | 0 |
| SI_k141_366348                        | 1502  | No | NA | 0  | 0  | Not-determined | Genome-fragment | NA    | 0 |
| SI_k141_333340                        | 1086  | No | NA | 0  | 1  | Not-determined | Genome-fragment | NA    | 0 |
| SI_k141_136572                        | 1262  | No | NA | 0  | 1  | Not-determined | Genome-fragment | NA    | 0 |
| SI_k141_333353                        | 3304  | No | NA | 0  | 1  | Not-determined | Genome-fragment | NA    | 0 |
| SI_k141_218289                        | 1602  | No | NA | 0  | 1  | Not-determined | Genome-fragment | NA    | 0 |
| SI_k141_4253                          | 4416  | No | NA | 0  | 0  | Not-determined | Genome-fragment | NA    | 0 |
| SI_k141_53581                         | 1055  | No | NA | 0  | 1  | Not-determined | Genome-fragment | NA    | 0 |
| SI_k141_317580                        | 1210  | No | NA | 0  | 1  | Not-determined | Genome-fragment | NA    | 0 |
| SI_k141_267614                        | 1414  | No | NA | 0  | 1  | Not-determined | Genome-fragment | NA    | 0 |
| SI_k141_152540                        | 1101  | No | NA | 0  | 3  | Not-determined | Genome-fragment | NA    | 0 |
| SI_k141_350367                        | 1264  | No | NA | 0  | 1  | Not-determined | Genome-fragment | NA    | 0 |
| SI_k141_317590                        | 1144  | No | NA | 0  | 0  | Not-determined | Genome-fragment | NA    | 0 |
| SI_k141_152559                        | 1189  | No | NA | 0  | 1  | Not-determined | Genome-fragment | NA    | 0 |
| SI7-final-viral-combined_k141_71005   | 1463  | No | NA | 0  | 2  | Low-quality    |                 |       |   |



|                                               |       |     |     |    |                |                 |                 |      |       |
|-----------------------------------------------|-------|-----|-----|----|----------------|-----------------|-----------------|------|-------|
| S8_k141_106522                                | 1483  | No  | NA  | 0  | 0              | Low-quality     | Genome-fragment | 1.11 | 0     |
| S1_k141_137798                                | 1127  | No  | NA  | 0  | 0              | Not-determined  | Genome-fragment | NA   | 0     |
| S1_k141_4458                                  | 4426  | No  | NA  | 0  | 0              | Not-determined  | Genome-fragment | NA   | 0     |
| S1_k141_366607                                | 6406  | No  | NA  | 0  | 1              | Not-determined  | Genome-fragment | NA   | 0     |
| S5-final-viral-combined_k141_52553[full]      | 1464  | No  | NA  | 1  | 0              | Low-quality     | Genome-fragment | 3.53 | 0     |
| S1_k141_37442                                 | 1050  | No  | NA  | 0  | 0              | Not-determined  | Genome-fragment | NA   | 0     |
| S1_k141_284621                                | 1137  | No  | NA  | 0  | 0              | Not-determined  | Genome-fragment | NA   | 0     |
| S5-final-viral-combined_k141_216456[full]     | 1464  | No  | NA  | 1  | 0              | Low-quality     | Genome-fragment | 3.58 | 0     |
| S1_k141_136857                                | 1059  | No  | NA  | 0  | 2              | Not-determined  | Genome-fragment | NA   | 0     |
| S1_k141_383005                                | 3024  | No  | NA  | 0  | 1              | Not-determined  | Genome-fragment | NA   | 0     |
| S1_k141_251999                                | 1594  | No  | NA  | 0  | 2              | Not-determined  | Genome-fragment | NA   | 0     |
| S1_k141_366619                                | 1515  | No  | NA  | 0  | 0              | Not-determined  | Genome-fragment | NA   | 0     |
| S3-final-viral-combined_k141_127910[full]     | 1464  | No  | NA  | 0  | 0              | Low-quality     | Genome-fragment | 1.78 | 0     |
| S5-final-viral-combined_k141_53073[full]      | 1464  | No  | NA  | 0  | 0              | Low-quality     | Genome-fragment | 1.96 | 0     |
| S5-final-viral-combined_k141_39548[1/2]gene   | 1464  | No  | NA  | 1  | 0              | Low-quality     | Genome-fragment | 1.42 | 0     |
| S1_k141_103898                                | 4006  | No  | NA  | 0  | 0              | Not-determined  | Genome-fragment | NA   | 0     |
| S7-final-viral-combined_k141_86208[full]      | 1464  | No  | NA  | 1  | 0              | Low-quality     | Genome-fragment | 0.93 | 0     |
| S1_k141_21315                                 | 3898  | No  | NA  | 0  | 3              | Not-determined  | Genome-fragment | NA   | 0     |
| S1_k141_152782                                | 1116  | No  | NA  | 0  | 1              | Not-determined  | Genome-fragment | NA   | 0     |
| S1_k141_202297                                | 1071  | No  | NA  | 0  | 0              | Not-determined  | Genome-fragment | NA   | 0     |
| S1_k141_267845                                | 3644  | No  | NA  | 0  | 0              | Not-determined  | Genome-fragment | NA   | 0     |
| S7-final-viral-combined_k141_39939[full]      | 1464  | No  | NA  | 2  | 0              | Low-quality     | Genome-fragment | 4.04 | 0     |
| S1_k141_136913                                | 3043  | No  | NA  | 0  | 1              | Not-determined  | Genome-fragment | NA   | 0     |
| S1_k141_86692                                 | 3662  | No  | NA  | 0  | 0              | Not-determined  | Genome-fragment | NA   | 0     |
| S1_k141_168735                                | 2187  | No  | NA  | 0  | 0              | Not-determined  | Genome-fragment | NA   | 0     |
| S7-final-viral-combined_k141_177319[full]     | 1464  | No  | NA  | 0  | 0              | Low-quality     | Genome-fragment | 0.43 | 0     |
| S1_k141_136963                                | 4921  | No  | NA  | 0  | 2              | Not-determined  | Genome-fragment | NA   | 0     |
| S17-k141_702                                  | 1464  | No  | NA  | 0  | 0              | Low-quality     | Genome-fragment | 2.98 | 0     |
| S1_k141_283227                                | 2103  | No  | NA  | 0  | 2              | Not-determined  | Genome-fragment | NA   | 0     |
| S1_k141_69659                                 | 5005  | No  | NA  | 0  | 4              | Not-determined  | Genome-fragment | NA   | 0     |
| S1_k141_318017                                | 9706  | No  | NA  | 0  | 4              | Not-determined  | Genome-fragment | NA   | 0     |
| S1_k141_383266                                | 1432  | No  | NA  | 1  | Not-determined | Genome-fragment | NA              | 0    | 0     |
| S1_k141_218736                                | 1644  | No  | NA  | 0  | 0              | Not-determined  | Genome-fragment | NA   | 0     |
| S1_k141_186227                                | 1143  | No  | NA  | 0  | 1              | Not-determined  | Genome-fragment | NA   | 0     |
| S12-final-viral-combined_k141_122696[full]    | 1464  | No  | NA  | 3  | 0              | Low-quality     | Genome-fragment | 3.04 | 0     |
| S1_k141_252229                                | 2720  | No  | NA  | 0  | 2              | Not-determined  | Genome-fragment | NA   | 0     |
| S1_k141_235294                                | 4527  | No  | NA  | 0  | 0              | Not-determined  | Genome-fragment | NA   | 0     |
| S1_k141_366807                                | 3664  | No  | NA  | 0  | 0              | Not-determined  | Genome-fragment | NA   | 0     |
| S1_k141_69779                                 | 10151 | No  | NA  | 10 | Not-determined | Genome-fragment | NA              | 0    | 0     |
| S1_k141_153002                                | 2227  | No  | NA  | 0  | 0              | Not-determined  | Genome-fragment | NA   | 0     |
| S1_k141_318132                                | 1000  | No  | NA  | 0  | 1              | Not-determined  | Genome-fragment | NA   | 0     |
| S1_k141_366827                                | 1661  | No  | NA  | 0  | 0              | Not-determined  | Genome-fragment | NA   | 0     |
| S1_k141_69795                                 | 4133  | No  | NA  | 0  | 0              | Not-determined  | Genome-fragment | NA   | 0     |
| S1_k141_186314                                | 1174  | No  | NA  | 0  | 1              | Not-determined  | Genome-fragment | NA   | 0     |
| S1_k141_252304                                | 1046  | No  | NA  | 0  | 1              | Not-determined  | Genome-fragment | NA   | 0     |
| S8-final-viral-combined_k141_112653[full]     | 1464  | No  | NA  | 1  | 0              | Low-quality     | Genome-fragment | 2.22 | 0     |
| S1_k141_202556                                | 3310  | No  | NA  | 0  | 0              | Not-determined  | Genome-fragment | NA   | 0     |
| S1_k141_318181                                | 1108  | No  | NA  | 0  | 0              | Not-determined  | Genome-fragment | NA   | 0     |
| S1_k141_120576                                | 1446  | No  | NA  | 0  | 2              | Not-determined  | Genome-fragment | NA   | 0     |
| S1_k141_86836                                 | 1037  | No  | NA  | 0  | 1              | Not-determined  | Genome-fragment | NA   | 0     |
| S1_k141_168966                                | 3115  | No  | NA  | 0  | 3              | Not-determined  | Genome-fragment | NA   | 0     |
| S1_k141_235263                                | 1051  | No  | NA  | 0  | 1              | Not-determined  | Genome-fragment | NA   | 0     |
| S1_k141_4874                                  | 1839  | No  | NA  | 0  | 1              | Not-determined  | Genome-fragment | NA   | 0     |
| S8_k141_60784                                 | 1464  | No  | NA  | 0  | 1              | Low-quality     | Genome-fragment | 1.15 | 0     |
| S1_k141_153095                                | 2947  | No  | NA  | 0  | 2              | Not-determined  | Genome-fragment | NA   | 0     |
| S1_k141_37873                                 | 1037  | No  | NA  | 0  | 1              | Not-determined  | Genome-fragment | NA   | 0     |
| S1_k141_137199                                | 1014  | No  | NA  | 0  | 0              | Not-determined  | Genome-fragment | NA   | 0     |
| S12-final-viral-combined_k141_399875[1/2]gene | 1465  | No  | NA  | 1  | 0              | Low-quality     | Genome-fragment | 3.58 | 0     |
| S1_k141_255413                                | 1079  | No  | NA  | 0  | 1              | Not-determined  | Genome-fragment | NA   | 0     |
| S1_k141_54049                                 | 1627  | No  | NA  | 0  | 1              | Not-determined  | Genome-fragment | NA   | 0     |
| S1_k141_302058                                | 1010  | No  | NA  | 0  | 0              | Not-determined  | Genome-fragment | NA   | 0     |
| S1_k141_333652                                | 1769  | No  | NA  | 0  | 1              | Not-determined  | Genome-fragment | NA   | 0     |
| S1_k141_367048                                | 1316  | No  | NA  | 0  | 1              | Not-determined  | Genome-fragment | NA   | 0     |
| S1_k141_120729                                | 4968  | No  | NA  | 0  | 1              | Not-determined  | Genome-fragment | NA   | 0     |
| S1_k141_268097                                | 11452 | No  | NA  | 0  | 0              | Not-determined  | Genome-fragment | NA   | 0     |
| S1_k141_302105                                | 2033  | No  | NA  | 0  | 0              | Not-determined  | Genome-fragment | NA   | 0     |
| S1_k141_284894                                | 1136  | No  | NA  | 0  | 0              | Not-determined  | Genome-fragment | NA   | 0     |
| S1_k141_103117                                | 1087  | No  | NA  | 0  | 1              | Not-determined  | Genome-fragment | NA   | 0     |
| S1_k141_383572                                | 2012  | No  | NA  | 0  | 1              | Not-determined  | Genome-fragment | NA   | 0     |
| S1_k141_367114                                | 8354  | No  | NA  | 0  | 1              | Not-determined  | Genome-fragment | NA   | 0     |
| S1_k141_120791                                | 1339  | No  | NA  | 0  | 0              | Not-determined  | Genome-fragment | NA   | 0     |
| S1_k141_215071                                | 2798  | No  | NA  | 0  | 1              | Not-determined  | Genome-fragment | NA   | 0     |
| S1_k141_252429                                | 2258  | No  | NA  | 0  | 1              | Not-determined  | Genome-fragment | NA   | 0     |
| S1_k141_268158                                | 1080  | No  | NA  | 0  | 1              | Not-determined  | Genome-fragment | NA   | 0     |
| S1_k141_235235                                | 2965  | No  | NA  | 0  | 1              | Not-determined  | Genome-fragment | NA   | 0     |
| S1_k141_120821                                | 7741  | No  | NA  | 0  | 3              | Not-determined  | Genome-fragment | NA   | 0     |
| S1_k141_268174                                | 1042  | No  | NA  | 0  | 0              | Not-determined  | Genome-fragment | NA   | 0     |
| S1_k141_87035                                 | 3281  | No  | NA  | 0  | 2              | Not-determined  | Genome-fragment | NA   | 0     |
| S12_k141_360808                               | 1465  | No  | NA  | 0  | 0              | Low-quality     | Genome-fragment | 3.73 | 0     |
| S1_k141_333767                                | 4247  | No  | NA  | 0  | 1              | Not-determined  | Genome-fragment | NA   | 0     |
| S1_k141_284942                                | 1096  | No  | NA  | 0  | 1              | Not-determined  | Genome-fragment | NA   | 0     |
| S1_k141_284952                                | 1184  | No  | NA  | 0  | 1              | Not-determined  | Genome-fragment | NA   | 0     |
| S6-final-viral-combined_k141_6156[full]       | 1465  | No  | NA  | 0  | 1              | Low-quality     | Genome-fragment | 0.76 | 0     |
| S6-final-viral-combined_k141_74076[full]      | 1465  | No  | NA  | 0  | 0              | Low-quality     | Genome-fragment | 3.71 | 0     |
| S1_k141_202150                                | 1058  | No  | NA  | 0  | 0              | Not-determined  | Genome-fragment | NA   | 0     |
| S1_k141_54188                                 | 3572  | No  | NA  | 0  | 2              | Not-determined  | Genome-fragment | NA   | 0     |
| S1_k141_153229                                | 1471  | No  | NA  | 0  | 1              | Not-determined  | Genome-fragment | NA   | 0     |
| S1_k141_137383                                | 1014  | No  | NA  | 0  | 1              | Not-determined  | Genome-fragment | NA   | 0     |
| S8-final-viral-combined_k141_32442[full]      | 1466  | No  | NA  | 0  | 0              | Low-quality     | Genome-fragment | 3.36 | 0     |
| S1_k141_137402                                | 3583  | No  | NA  | 0  | 1              | Not-determined  | Genome-fragment | NA   | 0     |
| S11_k141_52127                                | 1466  | No  | NA  | 1  | 0              | Low-quality     | Genome-fragment | 0.72 | 0     |
| S1_k141_137425                                | 3567  | No  | NA  | 0  | 0              | Not-determined  | Genome-fragment | NA   | 0     |
| S1_k141_21516                                 | 1068  | No  | NA  | 0  | 0              | Not-determined  | Genome-fragment | NA   | 0     |
| S1_k141_120934                                | 1323  | No  | NA  | 0  | 0              | Not-determined  | Genome-fragment | NA   | 0     |
| S1_k141_268283                                | 3444  | No  | NA  | 0  | 1              | Not-determined  | Genome-fragment | NA   | 0     |
| S1_k141_252532                                | 3347  | No  | NA  | 0  | 1              | Not-determined  | Genome-fragment | NA   | 0     |
| S1_k141_284997                                | 1458  | No  | NA  | 0  | 1              | Not-determined  | Genome-fragment | NA   | 0     |
| S1_k141_54271                                 | 2269  | No  | NA  | 0  | 2              | Not-determined  | Genome-fragment | NA   | 0     |
| S1_k141_252540                                | 7454  | No  | NA  | 0  | 1              | Not-determined  | Genome-fragment | NA   | 0     |
| S1_k141_54291                                 | 1279  | No  | NA  | 0  | 1              | Not-determined  | Genome-fragment | NA   | 0     |
| S1_k141_54303                                 | 5149  | No  | NA  | 0  | 5              | Not-determined  | Genome-fragment | NA   | 0     |
| S3-final-viral-combined_k141_43945[full]      | 1466  | No  | NA  | 1  | 0              | Low-quality     | Genome-fragment | 3.51 | 0     |
| S1_k141_351239                                | 1451  | No  | NA  | 0  | 2              | Not-determined  | Genome-fragment | NA   | 0     |
| S1_k141_318549                                | 7120  | No  | NA  | 0  | 1              | Not-determined  | Genome-fragment | NA   | 0     |
| S1_k141_351273                                | 1315  | No  | NA  | 0  | 0              | Not-determined  | Genome-fragment | NA   | 0     |
| S1_k141_169175                                | 1321  | No  | NA  | 0  | 1              | Not-determined  | Genome-fragment | NA   | 0     |
| S1_k141_202895                                | 1645  | No  | NA  | 0  | 1              | Not-determined  | Genome-fragment | NA   | 0     |
| S3-final-viral-combined_k141_29758[1/2]gene   | 1466  | No  | NA  | 1  | 0              | Low-quality     | Genome-fragment | 0.8  | 0     |
| S5-final-viral-combined_k141_28559[full]      | 1466  | No  | NA  | 1  | 0              | Low-quality     | Genome-fragment | 2.36 | 0     |
| S1_k141_318558                                | 3368  | No  | NA  | 0  | 0              | Not-determined  | Genome-fragment | NA   | 0     |
| S5-final-viral-combined_k141_28805[1/2]gene   | 1466  | No  | NA  | 1  | 0              | Low-quality     | Genome-fragment | 2.14 | 0     |
| S1_k141_351286                                | 3791  | No  | NA  | 1  | 1              | Not-determined  | Genome-fragment | NA   | 0     |
| S7-final-viral-combined_k141_92065[full]      | 1466  | Yes | 615 | 1  | 1              | Low-quality     | Genome-fragment | 1.45 | 58.05 |
| S7_k141_103936                                | 1466  | No  | NA  | 0  | 0              | Low-quality     | Genome-fragment | 0.25 | 0     |
| S1_k141_252615                                | 5087  | No  | NA  | 0  | 2              | Not-determined  | Genome-fragment | NA   | 0     |
| S1_k141_186739                                | 1635  | No  | NA  | 0  | 1              | Not-determined  | Genome-fragment | NA   | 0     |
| S1_k141_351336                                | 1552  | No  | NA  | 0  | 1              | Not-determined  | Genome-fragment | NA   | 0     |
| S12-final-viral-combined_k141_180247[1/2]gene | 1466  | No  | NA  | 1  | 0              | Low-quality     | Genome-fragment | 2.22 | 0     |
| S4-final-viral-combined_k141_117416[full]     | 1466  | No  | NA  | 0  | 0              | Low-quality     | Genome-fragment | 2.07 | 0     |
| S1_k141_351360                                | 1248  | No  | NA  | 0  | 0              | Not-determined  | Genome-fragment | NA   | 0     |
| S1-final-viral-combined_k141_182581[full]     | 1467  | No  | NA  | 0  | 0              | Low-quality     | Genome-fragment | 2.48 | 0     |
| S1-final-viral-combined_k141_62161[1/2]gene   | 1467  | No  | NA  | 0  | 0              | Low-quality     | Genome-fragment | 1.01 | 0     |
| S1_k141_252633                                | 1010  | No  | NA  | 0  | 1              | Not-determined  | Genome-fragment | NA   | 0     |
| S1_k141_285081                                | 2769  | No  | NA  | 0  | 0              | Not-determined  | Genome-fragment | NA   | 0     |
| S1_k141_268402                                | 1950  | No  | NA  | 0  | 0              | Not-determined  | Genome-fragment | NA   | 0     |
| S9_k141_37487                                 | 1467  | No  | NA  | 1  | 0              | Low-quality     | Genome-fragment | 0.95 | 0     |
| S1_k141_235774                                | 1109  | No  | NA  | 0  | 2              | Not-determined  | Genome-fragment | NA   | 0     |
| S1_k141_351282                                | 1035  | No  | NA  | 0  | 1              | Not-determined  | Genome-fragment | NA   | 0     |
| S1_k141_252699                                | 2352  | No  | NA  | 0  | 2              | Not-determined  | Genome-fragment | NA   | 0     |
| S1_k141_87272                                 | 1196  | No  | NA  | 0  | 2              | Not-determined  | Genome-fragment | NA   | 0     |
| S1_k141_235809                                | 1084  | No  | NA  | 0  | 1              | Not-determined  | Genome-fragment | NA   | 0     |
| S1_k141_311177                                | 1088  | No  | NA  | 0  | 0              | Not-determined  | Genome-fragment | NA   | 0     |
| S5-final-viral-combined_k141_39181[full]      | 1467  | No  | NA  | 0  | 0              | Low-quality     | Genome-fragment | 3.57 | 0     |
| S7-final-viral-combined_k141_6007[full]       | 1467  | No  | NA  | 0  | 0              | Low-quality     | Genome-fragment | 0.58 | 0     |
| S1_k141_54432                                 | 1065  | No  | NA  | 0  | 3              | Not-determined  | Genome-fragment | NA   | 0     |
| S1_k141_367456                                | 1437  | No  | NA  | 0  | 1              | Not-determined  | Genome-fragment | NA   | 0     |
| S1_k141_121207                                | 1678  | No  | NA  | 0  | 1              | Not-determined  | Genome-fragment | NA   | 0     |
| S7-final-viral-combined_k141_7091[full]       | 1467  | No  | NA  | 0  | 0              | Low-quality     | Genome-fragment | 1.72 | 0     |
| S1_k141_5310                                  | 3206  | No  | NA  | 0  | 2              | Not-determined  | Genome-fragment | NA   | 0     |
| S1_k141_285235                                | 2423  | No  | NA  | 0  | 1              | Not-determined  | Genome-fragment | NA   | 0     |
| S1_k141_169279                                | 3212  | No  | NA  | 0  | 1              | Not-determined  | Genome-fragment | NA   | 0     |
| S1_k141_54503                                 | 1142  | No  | NA  | 0  | 1              | Not-determined  | Genome-fragment | NA   | 0     |
| S1_k141_268484                                | 4310  | No  | NA  | 0  | 1              | Not-determined  | Genome-fragment | NA   | 0     |
| S1_k141_367303                                | 1069  | No  | NA  | 0  | 1              | Not-determined  | Genome-fragment | NA   | 0     |
| S7-final-viral-combined_k141_109227[full]     | 1467  | No  | NA  | 1  | 0              | Low-quality     | Genome-fragment | 3.68 | 0     |
| S1_k141_351537                                | 1075  | No  | NA  | 0  |                |                 |                 |      |       |



|                                              |       |     |    |    |   |                |                 |       |    |
|----------------------------------------------|-------|-----|----|----|---|----------------|-----------------|-------|----|
| SL_k141_384095                               | 1004  | No  | NA | 0  | 3 | Not-determined | Genome-fragment | NA    | 0  |
| SL_k141_121337                               | 1031  | No  | NA | 0  | 1 | Not-determined | Genome-fragment | NA    | 0  |
| SL_k141_169516                               | 3753  | No  | NA | 0  | 0 | Not-determined | Genome-fragment | NA    | 0  |
| SL_k141_236105                               | 22362 | No  | NA | 13 | 0 | Medium-quality | Genome-fragment | 50.89 | 0  |
| S11-final-viral-combined_k141_168293}[full   | 1468  | No  | NA | 0  | 0 | Low-quality    | Genome-fragment | 3.69  | 0  |
| SL_k141_367840                               | 2861  | No  | NA | 0  | 1 | Not-determined | Genome-fragment | NA    | 0  |
| SL_k141_103570                               | 1097  | No  | NA | 0  | 1 | Not-determined | Genome-fragment | NA    | 0  |
| SL_k141_187282                               | 1120  | No  | NA | 0  | 0 | Not-determined | Genome-fragment | NA    | 0  |
| SL_k141_121370                               | 1038  | No  | NA | 0  | 1 | Not-determined | Genome-fragment | NA    | 0  |
| SL_k141_103608                               | 2956  | No  | NA | 0  | 1 | Not-determined | Genome-fragment | NA    | 0  |
| SL_k141_318883                               | 1191  | No  | NA | 0  | 0 | Not-determined | Genome-fragment | NA    | 0  |
| SL_k141_253743                               | 1523  | No  | NA | 0  | 1 | Not-determined | Genome-fragment | NA    | 0  |
| SL_k141_384200                               | 1364  | No  | NA | 0  | 4 | Not-determined | Genome-fragment | NA    | 0  |
| S11_k141_75278                               | 1468  | No  | NA | 0  | 0 | Low-quality    | Genome-fragment | 3.19  | 0  |
| SL_k141_302752                               | 1678  | No  | NA | 0  | 1 | Not-determined | Genome-fragment | NA    | 0  |
| SL_k141_203470                               | 1217  | No  | NA | 0  | 1 | Not-determined | Genome-fragment | NA    | 0  |
| SL_k141_38547                                | 1898  | No  | NA | 0  | 0 | Not-determined | Genome-fragment | NA    | 0  |
| SL_k141_302776                               | 1115  | No  | NA | 0  | 1 | Not-determined | Genome-fragment | NA    | 0  |
| SL_k141_267916                               | 1750  | No  | NA | 0  | 0 | Not-determined | Genome-fragment | NA    | 0  |
| SL_k141_219826                               | 1172  | No  | NA | 0  | 2 | Not-determined | Genome-fragment | NA    | 0  |
| SL_k141_103649                               | 2515  | No  | NA | 0  | 0 | Not-determined | Genome-fragment | NA    | 0  |
| S11_k141_290906                              | 1468  | No  | NA | 1  | 0 | Low-quality    | Genome-fragment | 2.81  | 0  |
| SL_k141_236216                               | 1369  | No  | NA | 0  | 1 | Not-determined | Genome-fragment | NA    | 0  |
| SL_k141_54804                                | 1104  | No  | NA | 0  | 1 | Not-determined | Genome-fragment | NA    | 0  |
| SL_k141_70674                                | 1438  | No  | NA | 0  | 1 | Not-determined | Genome-fragment | NA    | 0  |
| SL_k141_384300                               | 1225  | No  | NA | 0  | 1 | Not-determined | Genome-fragment | NA    | 0  |
| S5-final-viral-combined_k141_85210}[full     | 1468  | No  | NA | 0  | 0 | Low-quality    | Genome-fragment | 1.19  | 0  |
| S5-final-viral-combined_k141_123419}[H2gene  | 1468  | No  | NA | 1  | 0 | Low-quality    | Genome-fragment | 23.76 | 0  |
| SL_k141_54839                                | 1252  | No  | NA | 0  | 1 | Not-determined | Genome-fragment | NA    | 0  |
| SL_k141_54842                                | 1793  | No  | NA | 0  | 1 | Not-determined | Genome-fragment | NA    | 0  |
| SL_k141_54859                                | 1680  | No  | NA | 0  | 0 | Not-determined | Genome-fragment | NA    | 0  |
| SL_k141_334293                               | 1073  | No  | NA | 0  | 0 | Not-determined | Genome-fragment | NA    | 0  |
| SL_k141_268854                               | 1704  | No  | NA | 0  | 3 | Not-determined | Genome-fragment | NA    | 0  |
| SL_k141_38644                                | 1710  | No  | NA | 0  | 1 | Not-determined | Genome-fragment | NA    | 0  |
| SL_k141_351829                               | 8288  | No  | NA | 0  | 1 | Not-determined | Genome-fragment | NA    | 0  |
| SL_k141_121498                               | 6289  | No  | NA | 0  | 0 | Not-determined | Genome-fragment | NA    | 0  |
| SL_k141_351853                               | 1108  | No  | NA | 0  | 1 | Not-determined | Genome-fragment | NA    | 0  |
| SL_k141_70716                                | 1422  | No  | NA | 0  | 2 | Not-determined | Genome-fragment | NA    | 0  |
| SL_k141_137976                               | 1587  | No  | NA | 0  | 1 | Not-determined | Genome-fragment | NA    | 0  |
| S12-final-viral-combined_k141_163046}[full   | 1468  | No  | NA | 2  | 0 | Low-quality    | Genome-fragment | 2.51  | 0  |
| SL_k141_319020                               | 2421  | No  | NA | 0  | 2 | Not-determined | Genome-fragment | NA    | 0  |
| SL_k141_368049                               | 1041  | No  | NA | 0  | 1 | Not-determined | Genome-fragment | NA    | 0  |
| SL_k141_169680                               | 1236  | No  | NA | 0  | 1 | Not-determined | Genome-fragment | NA    | 0  |
| SL_k141_236280                               | 2813  | No  | NA | 0  | 0 | Not-determined | Genome-fragment | NA    | 0  |
| SL_k141_169697                               | 3932  | No  | NA | 0  | 3 | Not-determined | Genome-fragment | NA    | 0  |
| SL_k141_153725                               | 3139  | No  | NA | 0  | 0 | Not-determined | Genome-fragment | NA    | 0  |
| SL_k141_220010                               | 1873  | No  | NA | 0  | 1 | Not-determined | Genome-fragment | NA    | 0  |
| SL_k141_253171                               | 1240  | No  | NA | 0  | 1 | Not-determined | Genome-fragment | NA    | 0  |
| SL_k141_87772                                | 1466  | No  | NA | 0  | 2 | Not-determined | Genome-fragment | NA    | 0  |
| S4_k141_51607                                | 1468  | No  | NA | 2  | 0 | Low-quality    | Genome-fragment | 0.86  | 0  |
| SL_k141_70814                                | 1328  | No  | NA | 0  | 1 | Not-determined | Genome-fragment | NA    | 0  |
| SL_k141_268946                               | 1272  | No  | NA | 0  | 1 | Not-determined | Genome-fragment | NA    | 0  |
| S8-final-viral-combined_k141_149008}[full    | 1468  | No  | NA | 1  | 0 | Low-quality    | Genome-fragment | 0.93  | 0  |
| SL_k141_54992                                | 1089  | No  | NA | 0  | 2 | Not-determined | Genome-fragment | NA    | 0  |
| S11-final-viral-combined_k141_170229}[full   | 1469  | No  | NA | 1  | 0 | Low-quality    | Genome-fragment | 2.49  | 0  |
| S11-final-viral-combined_k141_121518}[full   | 1469  | No  | NA | 0  | 0 | Low-quality    | Genome-fragment | 4.3   | 0  |
| SL_k141_121653                               | 1392  | No  | NA | 0  | 1 | Not-determined | Genome-fragment | NA    | 0  |
| SL_k141_99778                                | 1469  | No  | NA | 1  | 0 | Low-quality    | Genome-fragment | 0.68  | 0  |
| SL_k141_334426                               | 7546  | No  | NA | 0  | 1 | Not-determined | Genome-fragment | NA    | 0  |
| S5-final-viral-combined_k141_117469}[full    | 1469  | No  | NA | 2  | 0 | Low-quality    | Genome-fragment | 4.18  | 0  |
| S5-final-viral-combined_k141_4725}[full      | 1469  | No  | NA | 1  | 0 | Low-quality    | Genome-fragment | 1.87  | 0  |
| S5-final-viral-combined_k141_148088}[full    | 1469  | No  | NA | 0  | 0 | Low-quality    | Genome-fragment | 2.89  | 0  |
| SL_k141_351966                               | 1049  | No  | NA | 0  | 1 | Not-determined | Genome-fragment | NA    | 0  |
| SL_k141_203697                               | 1001  | No  | NA | 0  | 0 | Not-determined | Genome-fragment | NA    | 0  |
| SL_k141_103925                               | 1040  | No  | NA | 0  | 0 | Not-determined | Genome-fragment | NA    | 0  |
| SL_k141_169822                               | 1517  | No  | NA | 0  | 2 | Not-determined | Genome-fragment | NA    | 0  |
| SL_k141_236431                               | 1154  | No  | NA | 0  | 1 | Not-determined | Genome-fragment | NA    | 0  |
| SL_k141_253303                               | 1804  | No  | NA | 0  | 1 | Not-determined | Genome-fragment | NA    | 0  |
| SL_k141_187510                               | 4562  | No  | NA | 0  | 1 | Not-determined | Genome-fragment | NA    | 0  |
| SL_k141_38875                                | 1095  | No  | NA | 0  | 1 | Not-determined | Genome-fragment | NA    | 0  |
| S7_k141_217874                               | 1469  | No  | NA | 1  | 0 | Low-quality    | Genome-fragment | 2.51  | 0  |
| SL_k141_103998                               | 1098  | No  | NA | 0  | 1 | Not-determined | Genome-fragment | NA    | 0  |
| SL_k141_22222                                | 4563  | No  | NA | 0  | 0 | Not-determined | Genome-fragment | NA    | 0  |
| SL_k141_38913                                | 1719  | No  | NA | 0  | 2 | Not-determined | Genome-fragment | NA    | 0  |
| SL_k141_187541                               | 9571  | No  | NA | 0  | 4 | Not-determined | Genome-fragment | NA    | 0  |
| SL_k141_384637                               | 6675  | No  | NA | 0  | 2 | Not-determined | Genome-fragment | NA    | 0  |
| SL_k141_334597                               | 1044  | No  | NA | 0  | 0 | Not-determined | Genome-fragment | NA    | 0  |
| SL_k141_285846                               | 3371  | No  | NA | 0  | 1 | Not-determined | Genome-fragment | NA    | 0  |
| SL_k141_187556                               | 1349  | No  | NA | 0  | 1 | Not-determined | Genome-fragment | NA    | 0  |
| SL_k141_384647                               | 1486  | No  | NA | 0  | 0 | Not-determined | Genome-fragment | NA    | 0  |
| SL_k141_121818                               | 3012  | No  | NA | 0  | 2 | Not-determined | Genome-fragment | NA    | 0  |
| SL_k141_319350                               | 1072  | No  | NA | 0  | 0 | Not-determined | Genome-fragment | NA    | 0  |
| SL_k141_253406                               | 1067  | No  | NA | 0  | 1 | Not-determined | Genome-fragment | NA    | 0  |
| SL_k141_236542                               | 2105  | No  | NA | 0  | 1 | Not-determined | Genome-fragment | NA    | 0  |
| SL_k141_222465                               | 1059  | No  | NA | 0  | 1 | Not-determined | Genome-fragment | NA    | 0  |
| SL_k141_5961                                 | 3223  | No  | NA | 0  | 1 | Not-determined | Genome-fragment | NA    | 0  |
| SL_k141_87984                                | 1458  | No  | NA | 0  | 1 | Not-determined | Genome-fragment | NA    | 0  |
| S17-final-viral-combined_k141_17213}[full    | 1469  | No  | NA | 0  | 0 | Low-quality    | Genome-fragment | 1.09  | 0  |
| SL_k141_5984                                 | 1055  | No  | NA | 0  | 1 | Not-determined | Genome-fragment | NA    | 0  |
| SL_k141_319423                               | 7338  | No  | NA | 0  | 5 | Not-determined | Genome-fragment | NA    | 0  |
| SL_k141_352192                               | 1187  | No  | NA | 0  | 1 | Not-determined | Genome-fragment | NA    | 0  |
| SL_k141_6005                                 | 1297  | No  | NA | 0  | 0 | Not-determined | Genome-fragment | NA    | 0  |
| SL_k141_121849                               | 2063  | No  | NA | 0  | 1 | Not-determined | Genome-fragment | NA    | 0  |
| SL_k141_38983                                | 4772  | No  | NA | 0  | 5 | Not-determined | Genome-fragment | NA    | 0  |
| S12-final-viral-combined_k141_251216}[full   | 1469  | No  | NA | 1  | 0 | Low-quality    | Genome-fragment | 1.09  | 0  |
| SL_k141_203893                               | 2759  | No  | NA | 0  | 2 | Not-determined | Genome-fragment | NA    | 0  |
| SL_k141_121869                               | 2243  | No  | NA | 0  | 2 | Not-determined | Genome-fragment | NA    | 0  |
| SL_k141_352211                               | 2015  | No  | NA | 0  | 2 | Not-determined | Genome-fragment | NA    | 0  |
| SL_k141_223113                               | 1046  | No  | NA | 0  | 1 | Not-determined | Genome-fragment | NA    | 0  |
| SL_k141_121909                               | 1347  | No  | NA | 0  | 0 | Not-determined | Genome-fragment | NA    | 0  |
| S2-final-viral-combined_k141_26756}[full     | 1469  | No  | NA | 1  | 0 | Low-quality    | Genome-fragment | 0.96  | 0  |
| S2_k141_115187                               | 1469  | No  | NA | 0  | 0 | Low-quality    | Genome-fragment | 2.45  | 0  |
| SL_k141_121935                               | 1585  | No  | NA | 0  | 0 | Not-determined | Genome-fragment | NA    | 0  |
| SL_k141_187737                               | 1290  | No  | NA | 0  | 1 | Not-determined | Genome-fragment | NA    | 0  |
| SL_k141_253400                               | 1182  | No  | NA | 0  | 0 | Not-determined | Genome-fragment | NA    | 0  |
| SL_k141_269273                               | 1259  | No  | NA | 0  | 1 | Not-determined | Genome-fragment | NA    | 0  |
| SL_k141_71175                                | 1379  | No  | NA | 0  | 1 | Not-determined | Genome-fragment | NA    | 0  |
| SL_k141_138279                               | 2062  | No  | NA | 0  | 0 | Not-determined | Genome-fragment | NA    | 0  |
| S11-final-viral-combined_k141_37059}[full    | 1470  | No  | NA | 0  | 0 | Low-quality    | Genome-fragment | 3.22  | 0  |
| S11-final-viral-combined_k141_316121}[full   | 1470  | No  | NA | 0  | 0 | Low-quality    | Genome-fragment | 3.02  | 0  |
| SL_k141_154035                               | 1397  | No  | NA | 0  | 0 | Not-determined | Genome-fragment | NA    | 0  |
| SL_k141_352297                               | 3322  | No  | NA | 0  | 0 | Not-determined | Genome-fragment | NA    | 0  |
| SL_k141_6096                                 | 1293  | No  | NA | 0  | 0 | Not-determined | Genome-fragment | NA    | 0  |
| SL_k141_71200                                | 2519  | No  | NA | 0  | 0 | Not-determined | Genome-fragment | NA    | 0  |
| SL_k141_38155                                | 1347  | No  | NA | 0  | 1 | Not-determined | Genome-fragment | NA    | 0  |
| SL_k141_6131                                 | 1059  | No  | NA | 0  | 2 | Not-determined | Genome-fragment | NA    | 0  |
| SL_k141_204065                               | 3505  | No  | NA | 0  | 1 | Not-determined | Genome-fragment | NA    | 0  |
| S17-final-viral-combined_k141_51751}[full    | 1470  | Yes | NA | 1  | 1 | Low-quality    | Genome-fragment | 0.15  | 80 |
| S17-final-viral-combined_k141_194185}[H2gene | 1470  | No  | NA | 1  | 0 | Low-quality    | Genome-fragment | 1.38  | 0  |
| SL_k141_236658                               | 1232  | No  | NA | 0  | 2 | Not-determined | Genome-fragment | NA    | 0  |
| S2-final-viral-combined_k141_182620}[full    | 1470  | No  | NA | 0  | 1 | Low-quality    | Genome-fragment | 3.1   | 0  |
| SL_k141_269335                               | 1756  | No  | NA | 0  | 2 | Not-determined | Genome-fragment | NA    | 0  |
| S2-final-viral-combined_k141_37172}[H2gene   | 1470  | No  | NA | 2  | 0 | Low-quality    | Genome-fragment | 3.83  | 0  |
| SL_k141_39114                                | 1901  | No  | NA | 0  | 0 | Not-determined | Genome-fragment | NA    | 0  |
| SL_k141_334791                               | 3819  | No  | NA | 0  | 4 | Not-determined | Genome-fragment | NA    | 0  |
| SL_k141_154140                               | 3044  | No  | NA | 0  | 3 | Not-determined | Genome-fragment | NA    | 0  |
| SL_k141_303172                               | 1405  | No  | NA | 0  | 0 | Not-determined | Genome-fragment | NA    | 0  |
| SL_k141_268372                               | 1013  | No  | NA | 0  | 1 | Not-determined | Genome-fragment | NA    | 0  |
| SL_k141_352408                               | 1365  | No  | NA | 0  | 0 | Not-determined | Genome-fragment | NA    | 0  |
| SL_k141_253771                               | 1211  | No  | NA | 0  | 0 | Not-determined | Genome-fragment | NA    | 0  |
| SL_k141_137015                               | 40097 | No  | NA | 23 | 1 | High-quality   | High-quality    | 100   | 0  |
| SL_k141_204136                               | 2568  | No  | NA | 0  | 2 | Not-determined | Genome-fragment | NA    | 0  |
| SL_k141_71292                                | 4202  | No  | NA | 0  | 0 | Not-determined | Genome-fragment | NA    | 0  |
| SL_k141_204142                               | 1034  | No  | NA | 0  | 2 | Not-determined | Genome-fragment | NA    | 0  |
| SL_k141_88280                                | 3161  | No  | NA | 0  | 2 | Not-determined | Genome-fragment | NA    | 0  |
| SL_k141_170161                               | 1499  | No  | NA | 0  | 0 | Not-determined | Genome-fragment | NA    | 0  |
| S8-final-viral-combined_k141_155536}[full    | 1470  | No  | NA | 0  | 0 | Low-quality    | Genome-fragment | 1.06  | 0  |
| S11-final-viral-combined_k141_324075}[full   | 1471  | No  | NA | 0  | 0 | Low-quality    | Genome-fragment | 3.18  | 0  |
| SL_k141_352438                               | 1120  | No  | NA | 0  | 0 | Not-determined | Genome-fragment | NA    | 0  |
| S8-final-viral-combined_k141_81836}[full     | 1471  | No  | NA | 0  | 0 | Low-quality    | Genome-fragment | 1.66  | 0  |
| S5-final-viral-combined_k141_174766}[full    | 1471  | No  | NA | 0  | 0 | Low-quality    | Genome-fragment | 2.37  | 0  |
| S7-final-viral-combined_k141_143996}[full    | 1471  | No  | NA | 0  | 0 | Low-quality    | Genome-fragment | 2.44  | 0  |
| SL_k141_204192                               | 1754  | No  | NA | 0  | 1 | Not-determined | Genome-fragment | NA    | 0  |
| SL_k141_6291                                 | 1397  | No  | NA | 0  | 1 | Not-determined | Genome-fragment | NA    | 0  |
| S7-final-viral-combined_k141_23365}[full     | 1471  | No  | NA | 0  | 1 | Low-quality    | Genome-fragment | 2.77  | 0  |
| SL_k141_334971                               | 1262  | No  | NA | 0  | 2 | Not-determined | Genome-fragment | NA    | 0  |



|                                      |      |    |    |   |    |                |                 |      |   |
|--------------------------------------|------|----|----|---|----|----------------|-----------------|------|---|
| SL_k141_335113                       | 5677 | No | NA | 0 | 1  | Not-determined | Genome-fragment | NA   | 0 |
| S11-final-viral-combined_k141_42488  | 1472 | No | NA | 1 | 0  | Low-quality    | Genome-fragment | 0.91 | 0 |
| SL_k141_138643                       | 1635 | No | NA | 0 | 0  | Not-determined | Genome-fragment | NA   | 0 |
| SL_k141_254037                       | 1083 | No | NA | 0 | 0  | Not-determined | Genome-fragment | NA   | 0 |
| SL_k141_303394                       | 1257 | No | NA | 0 | 3  | Not-determined | Genome-fragment | NA   | 0 |
| SL_k141_204488                       | 1015 | No | NA | 0 | 1  | Not-determined | Genome-fragment | NA   | 0 |
| SL_k141_335170                       | 1139 | No | NA | 0 | 4  | Not-determined | Genome-fragment | NA   | 0 |
| SL_k141_335171                       | 3374 | No | NA | 0 | 1  | Not-determined | Genome-fragment | NA   | 0 |
| S11-final-viral-combined_k141_366109 | 1472 | No | NA | 0 | 0  | Low-quality    | Genome-fragment | 1.98 | 0 |
| SL_k141_385234                       | 1385 | No | NA | 0 | 0  | Not-determined | Genome-fragment | NA   | 0 |
| SL_k141_220544                       | 1049 | No | NA | 0 | 1  | Not-determined | Genome-fragment | NA   | 0 |
| SL_k141_104516                       | 1394 | No | NA | 0 | 0  | Not-determined | Genome-fragment | NA   | 0 |
| SL_k141_188204                       | 1058 | No | NA | 0 | 0  | Not-determined | Genome-fragment | NA   | 0 |
| SL_k141_204519                       | 1038 | No | NA | 0 | 1  | Not-determined | Genome-fragment | NA   | 0 |
| S11-final-viral-combined_k141_389726 | 1472 | No | NA | 1 | 0  | Low-quality    | Genome-fragment | 3.22 | 0 |
| SL_k141_220553                       | 1169 | No | NA | 0 | 1  | Not-determined | Genome-fragment | NA   | 0 |
| S11-final-viral-combined_k141_118477 | 1472 | No | NA | 2 | 0  | Low-quality    | Genome-fragment | 3.75 | 0 |
| SL_k141_122535                       | 3589 | No | NA | 0 | 2  | Not-determined | Genome-fragment | NA   | 0 |
| SL_k141_138742                       | 1202 | No | NA | 0 | 1  | Not-determined | Genome-fragment | NA   | 0 |
| SL_k141_254106                       | 2975 | No | NA | 0 | 2  | Not-determined | Genome-fragment | NA   | 0 |
| SL_k141_88645                        | 2135 | No | NA | 0 | 2  | Not-determined | Genome-fragment | NA   | 0 |
| SL_k141_58232                        | 1472 | No | NA | 0 | 0  | Low-quality    | Genome-fragment | 2.53 | 0 |
| SL_k141_71673                        | 1048 | No | NA | 0 | 1  | Not-determined | Genome-fragment | NA   | 0 |
| SL_k141_254138                       | 1933 | No | NA | 0 | 1  | Not-determined | Genome-fragment | NA   | 0 |
| SL_k141_22520                        | 4483 | No | NA | 0 | 10 | Not-determined | Genome-fragment | NA   | 0 |
| SL_k141_230024                       | 3372 | No | NA | 0 | 0  | Not-determined | Genome-fragment | NA   | 0 |
| SL_k141_220637                       | 1174 | No | NA | 0 | 1  | Not-determined | Genome-fragment | NA   | 0 |
| SL_k141_22951                        | 4311 | No | NA | 0 | 2  | Not-determined | Genome-fragment | NA   | 0 |
| SL_k141_203546                       | 3401 | No | NA | 0 | 2  | Not-determined | Genome-fragment | NA   | 0 |
| SL_k141_104617                       | 7989 | No | NA | 0 | 5  | Not-determined | Genome-fragment | NA   | 0 |
| SL_k141_122647                       | 1448 | No | NA | 0 | 0  | Not-determined | Genome-fragment | NA   | 0 |
| SL_k141_254254                       | 1463 | No | NA | 1 | 1  | Not-determined | Genome-fragment | NA   | 0 |
| S17-final-viral-combined_k141_189969 | 1472 | No | NA | 1 | 0  | Low-quality    | Genome-fragment | 1.7  | 0 |
| S17-final-viral-combined_k141_205240 | 1472 | No | NA | 0 | 0  | Low-quality    | Genome-fragment | 2.63 | 0 |
| SL_k141_55933                        | 3084 | No | NA | 0 | 1  | Not-determined | Genome-fragment | NA   | 0 |
| SL_k141_104665                       | 1323 | No | NA | 0 | 1  | Not-determined | Genome-fragment | NA   | 0 |
| SL_k141_368586                       | 1162 | No | NA | 0 | 0  | Not-determined | Genome-fragment | NA   | 0 |
| SL_k141_254300                       | 1583 | No | NA | 0 | 0  | Not-determined | Genome-fragment | NA   | 0 |
| SL_k141_104710                       | 2023 | No | NA | 0 | 1  | Not-determined | Genome-fragment | NA   | 0 |
| SL_k141_353013                       | 1053 | No | NA | 0 | 2  | Not-determined | Genome-fragment | NA   | 0 |
| SL_k141_335317                       | 6501 | No | NA | 0 | 6  | Not-determined | Genome-fragment | NA   | 0 |
| SL_k141_368416                       | 1000 | No | NA | 0 | 1  | Not-determined | Genome-fragment | NA   | 0 |
| SL_k141_71855                        | 2036 | No | NA | 0 | 1  | Not-determined | Genome-fragment | NA   | 0 |
| SL_k141_286456                       | 1590 | No | NA | 0 | 0  | Not-determined | Genome-fragment | NA   | 0 |
| SL_k141_302680                       | 1103 | No | NA | 0 | 1  | Not-determined | Genome-fragment | NA   | 0 |
| SL_k141_6742                         | 1276 | No | NA | 0 | 3  | Not-determined | Genome-fragment | NA   | 0 |
| SL_k141_353026                       | 5866 | No | NA | 0 | 0  | Not-determined | Genome-fragment | NA   | 0 |
| S12-final-viral-combined_k141_47281  | 1472 | No | NA | 0 | 1  | Low-quality    | Genome-fragment | 1.69 | 0 |
| S2-final-viral-combined_k141_229970  | 1472 | No | NA | 0 | 0  | Low-quality    | Genome-fragment | 2.61 | 0 |
| S4-final-viral-combined_k141_153121  | 1472 | No | NA | 1 | 0  | Low-quality    | Genome-fragment | 3.25 | 0 |
| SL_k141_122789                       | 3353 | No | NA | 0 | 2  | Not-determined | Genome-fragment | NA   | 0 |
| S9_k141_127904                       | 1472 | No | NA | 0 | 1  | Low-quality    | Genome-fragment | 0.25 | 0 |
| SL_k141_170614                       | 4193 | No | NA | 0 | 4  | Not-determined | Genome-fragment | NA   | 0 |
| SL_k141_23148                        | 1013 | No | NA | 0 | 1  | Not-determined | Genome-fragment | NA   | 0 |
| SL_k141_385473                       | 1072 | No | NA | 0 | 0  | Not-determined | Genome-fragment | NA   | 0 |
| SL_k141_254382                       | 1249 | No | NA | 0 | 2  | Not-determined | Genome-fragment | NA   | 0 |
| S11-final-viral-combined_k141_270484 | 1473 | No | NA | 2 | 0  | Low-quality    | Genome-fragment | 1.78 | 0 |
| SL_k141_54099                        | 3969 | No | NA | 0 | 1  | Not-determined | Genome-fragment | NA   | 0 |
| SL_k141_231485                       | 1105 | No | NA | 0 | 0  | Not-determined | Genome-fragment | NA   | 0 |
| SL_k141_353103                       | 1665 | No | NA | 0 | 0  | Not-determined | Genome-fragment | NA   | 0 |
| S11_k141_44174                       | 1473 | No | NA | 0 | 0  | Low-quality    | Genome-fragment | 1.2  | 0 |
| SL_k141_39650                        | 1173 | No | NA | 0 | 1  | Not-determined | Genome-fragment | NA   | 0 |
| SL_k141_154632                       | 1875 | No | NA | 0 | 1  | Not-determined | Genome-fragment | NA   | 0 |
| SL_k141_188426                       | 1168 | No | NA | 0 | 1  | Not-determined | Genome-fragment | NA   | 0 |
| SL_k141_204866                       | 4425 | No | NA | 0 | 1  | Not-determined | Genome-fragment | NA   | 0 |
| S1-final-viral-combined_k141_108867  | 1473 | No | NA | 0 | 0  | Low-quality    | Genome-fragment | 2.36 | 0 |
| SL_k141_320365                       | 4138 | No | NA | 0 | 1  | Not-determined | Genome-fragment | NA   | 0 |
| S17-final-viral-combined_k141_195469 | 1473 | No | NA | 1 | 0  | Low-quality    | Genome-fragment | 3.93 | 0 |
| SL_k141_170734                       | 1139 | No | NA | 0 | 0  | Not-determined | Genome-fragment | NA   | 0 |
| SL_k141_385550                       | 1196 | No | NA | 0 | 0  | Not-determined | Genome-fragment | NA   | 0 |
| SL_k141_122980                       | 1481 | No | NA | 0 | 1  | Not-determined | Genome-fragment | NA   | 0 |
| SL_k141_232451                       | 2711 | No | NA | 0 | 1  | Not-determined | Genome-fragment | NA   | 0 |
| SL_k141_237594                       | 3659 | No | NA | 0 | 0  | Not-determined | Genome-fragment | NA   | 0 |
| SL_k141_335507                       | 7287 | No | NA | 0 | 5  | Not-determined | Genome-fragment | NA   | 0 |
| SL_k141_170828                       | 1367 | No | NA | 0 | 2  | Not-determined | Genome-fragment | NA   | 0 |
| SL_k141_270060                       | 2270 | No | NA | 0 | 2  | Not-determined | Genome-fragment | NA   | 0 |
| SL_k141_7044                         | 4460 | No | NA | 0 | 2  | Not-determined | Genome-fragment | NA   | 0 |
| SL_k141_353255                       | 1275 | No | NA | 0 | 1  | Not-determined | Genome-fragment | NA   | 0 |
| SL_k141_188585                       | 1009 | No | NA | 0 | 1  | Not-determined | Genome-fragment | NA   | 0 |
| SL_k141_123088                       | 1726 | No | NA | 0 | 1  | Not-determined | Genome-fragment | NA   | 0 |
| SL_k141_188613                       | 4486 | No | NA | 0 | 2  | Not-determined | Genome-fragment | NA   | 0 |
| SL_k141_353282                       | 1246 | No | NA | 0 | 1  | Not-determined | Genome-fragment | NA   | 0 |
| SL_k141_170908                       | 1176 | No | NA | 0 | 1  | Not-determined | Genome-fragment | NA   | 0 |
| S2-final-viral-combined_k141_208625  | 1473 | No | NA | 0 | 0  | Low-quality    | Genome-fragment | 3.69 | 0 |
| SL_k141_254633                       | 2237 | No | NA | 0 | 1  | Not-determined | Genome-fragment | NA   | 0 |
| S2-final-viral-combined_k141_95005   | 1473 | No | NA | 2 | 0  | Low-quality    | Genome-fragment | 3.31 | 0 |
| SL_k141_320615                       | 1044 | No | NA | 0 | 1  | Not-determined | Genome-fragment | NA   | 0 |
| SL_k141_170958                       | 1742 | No | NA | 0 | 1  | Not-determined | Genome-fragment | NA   | 0 |
| SL_k141_138213                       | 2406 | No | NA | 0 | 1  | Not-determined | Genome-fragment | NA   | 0 |
| SL_k141_270220                       | 1557 | No | NA | 0 | 1  | Not-determined | Genome-fragment | NA   | 0 |
| S8-final-viral-combined_k141_119505  | 1473 | No | NA | 1 | 0  | Low-quality    | Genome-fragment | 2.15 | 0 |
| S11-final-viral-combined_k141_279556 | 1474 | No | NA | 0 | 1  | Low-quality    | Genome-fragment | 2.43 | 0 |
| SL_k141_56428                        | 1034 | No | NA | 0 | 0  | Not-determined | Genome-fragment | NA   | 0 |
| SL_k141_89218                        | 1268 | No | NA | 0 | 0  | Not-determined | Genome-fragment | NA   | 0 |
| SL_k141_205108                       | 1152 | No | NA | 0 | 0  | Not-determined | Genome-fragment | NA   | 0 |
| SL_k141_56462                        | 2102 | No | NA | 0 | 0  | Not-determined | Genome-fragment | NA   | 0 |
| SL_k141_353371                       | 1974 | No | NA | 0 | 1  | Not-determined | Genome-fragment | NA   | 0 |
| SL_k141_89220                        | 1116 | No | NA | 0 | 1  | Not-determined | Genome-fragment | NA   | 0 |
| S11-final-viral-combined_k141_81374  | 1474 | No | NA | 1 | 0  | Low-quality    | Genome-fragment | 4    | 0 |
| S11-final-viral-combined_k141_208061 | 1474 | No | NA | 0 | 0  | Low-quality    | Genome-fragment | 4.12 | 0 |
| SL_k141_353413                       | 2106 | No | NA | 0 | 1  | Not-determined | Genome-fragment | NA   | 0 |
| SL_k141_353416                       | 1221 | No | NA | 0 | 1  | Not-determined | Genome-fragment | NA   | 0 |
| SL_k141_154959                       | 1198 | No | NA | 0 | 0  | Not-determined | Genome-fragment | NA   | 0 |
| SL_k141_123240                       | 2041 | No | NA | 0 | 0  | Not-determined | Genome-fragment | NA   | 0 |
| SL_k141_154968                       | 1054 | No | NA | 0 | 2  | Not-determined | Genome-fragment | NA   | 0 |
| SL_k141_320856                       | 8935 | No | NA | 0 | 8  | Not-determined | Genome-fragment | NA   | 0 |
| SL_k141_368991                       | 4794 | No | NA | 0 | 5  | Not-determined | Genome-fragment | NA   | 0 |
| SL_k141_72322                        | 3078 | No | NA | 0 | 1  | Not-determined | Genome-fragment | NA   | 0 |
| SL_k141_89329                        | 1487 | No | NA | 0 | 1  | Not-determined | Genome-fragment | NA   | 0 |
| SL_k141_139416                       | 2867 | No | NA | 0 | 0  | Not-determined | Genome-fragment | NA   | 0 |
| SL_k141_320873                       | 7594 | No | NA | 0 | 2  | Not-determined | Genome-fragment | NA   | 0 |
| S11-final-viral-combined_k141_626301 | 1474 | No | NA | 0 | 0  | Low-quality    | Genome-fragment | 2.92 | 0 |
| SL_k141_89349                        | 1061 | No | NA | 0 | 1  | Not-determined | Genome-fragment | NA   | 0 |
| SL_k141_39883                        | 1545 | No | NA | 0 | 1  | Not-determined | Genome-fragment | NA   | 0 |
| SL_k141_72360                        | 1015 | No | NA | 0 | 0  | Not-determined | Genome-fragment | NA   | 0 |
| SL_k141_7235                         | 1445 | No | NA | 0 | 0  | Not-determined | Genome-fragment | NA   | 0 |
| S17-final-viral-combined_k141_156394 | 1474 | No | NA | 0 | 1  | Low-quality    | Genome-fragment | 3.02 | 0 |
| SL_k141_204196                       | 1101 | No | NA | 0 | 0  | Not-determined | Genome-fragment | NA   | 0 |
| S17-final-viral-combined_k141_218427 | 1474 | No | NA | 2 | 0  | Low-quality    | Genome-fragment | 2.85 | 0 |
| S17-k141_193249                      | 1474 | No | NA | 2 | 0  | Low-quality    | Genome-fragment | 3.44 | 0 |
| SL_k141_309054                       | 1209 | No | NA | 0 | 1  | Not-determined | Genome-fragment | NA   | 0 |
| SL_k141_231357                       | 1371 | No | NA | 0 | 1  | Not-determined | Genome-fragment | NA   | 0 |
| S12-final-viral-combined_k141_53177  | 1474 | No | NA | 0 | 0  | Low-quality    | Genome-fragment | 1.82 | 0 |
| SL_k141_188885                       | 1487 | No | NA | 0 | 1  | Not-determined | Genome-fragment | NA   | 0 |
| SL_k141_221240                       | 1014 | No | NA | 0 | 0  | Not-determined | Genome-fragment | NA   | 0 |
| SL_k141_123406                       | 4346 | No | NA | 0 | 0  | Not-determined | Genome-fragment | NA   | 0 |
| SL_k141_39984                        | 4909 | No | NA | 0 | 1  | Not-determined | Genome-fragment | NA   | 0 |
| SL_k141_139473                       | 2852 | No | NA | 0 | 4  | Not-determined | Genome-fragment | NA   | 0 |
| SL_k141_23609                        | 1076 | No | NA | 0 | 0  | Not-determined | Genome-fragment | NA   | 0 |
| SL_k141_56603                        | 1077 | No | NA | 0 | 0  | Not-determined | Genome-fragment | NA   | 0 |
| SL_k141_369111                       | 3402 | No | NA | 0 | 2  | Not-determined | Genome-fragment | NA   | 0 |
| SL_k141_254980                       | 3240 | No | NA | 0 | 1  | Not-determined | Genome-fragment | NA   | 0 |
| SL_k141_321061                       | 1013 | No | NA | 0 | 0  | Not-determined | Genome-fragment | NA   | 0 |
| SL_k141_353564                       | 1375 | No | NA | 0 | 0  | Not-determined | Genome-fragment | NA   | 0 |
| SL_k141_40044                        | 9105 | No | NA | 0 | 3  | Not-determined | Genome-fragment | NA   | 0 |
| SL_k141_321108                       | 1013 | No | NA | 0 | 1  | Not-determined | Genome-fragment | NA   | 0 |
| SL_k141_56640                        | 2535 | No | NA | 0 | 2  | Not-determined | Genome-fragment | NA   | 0 |
| SL_k141_221330                       | 1389 | No | NA | 0 | 0  | Not-determined | Genome-fragment | NA   | 0 |
| S12_k141_77159                       | 1474 | No | NA | 0 | 1  | Low-quality    | Genome-fragment | 0.6  | 0 |
| SL_k141_254959                       | 3919 | No | NA | 0 | 10 | Not-determined | Genome-fragment | NA   | 0 |
| SL_k141_238113                       | 1010 | No | NA | 0 | 0  | Not-determined | Genome-fragment | NA   | 0 |
| SL_k141_7437                         | 5808 | No | NA | 0 | 4  | Not-determined | Genome-fragment | NA   | 0 |
| S2-final-viral-combined_k141_204279  | 1474 | No | NA | 2 | 0  | Low-quality    | Genome-fragment | 3.12 | 0 |
| S4-final-viral-combined_k141_17812   | 1474 | No | NA | 0 | 2  | Low-quality    | Genome-fragment | 0.4  | 0 |
| SL_k141_72528                        | 1980 | No | NA | 0 | 4  | Not-determined | Genome-fragment | NA   | 0 |
| S8-final-viral-combined_k141_220108  | 1474 | No | NA | 1 | 0  | Low-quality    | Genome-fragment | 0.99 | 0 |
| S11-final-viral-combined_k141_722661 | 1475 | No | NA | 1 |    |                |                 |      |   |



|                                              |       |    |    |   |   |                |                 |    |       |
|----------------------------------------------|-------|----|----|---|---|----------------|-----------------|----|-------|
| SL_k141_321309                               | 1261  | No | NA | 0 | 1 | Not-determined | Genome-fragment | NA | 0     |
| SL_k141_123616                               | 1501  | No | NA | 0 | 1 | Not-determined | Genome-fragment | NA | 0     |
| SL_k141_155378                               | 6534  | No | NA | 0 | 3 | Not-determined | Genome-fragment | NA | 0     |
| SL_k141_89666                                | 1515  | No | NA | 0 | 2 | Not-determined | Genome-fragment | NA | 0     |
| S8-final-viral-combined_k141_216696  full    | 1475  | No | NA | 1 | 0 | Low-quality    | Genome-fragment | NA | 2.84  |
| SL_k141_56921                                | 1050  | No | NA | 0 | 1 | Not-determined | Genome-fragment | NA | 0     |
| SL_k141_221595                               | 1925  | No | NA | 0 | 1 | Not-determined | Genome-fragment | NA | 0     |
| SL_k141_304463                               | 3168  | No | NA | 0 | 1 | Not-determined | Genome-fragment | NA | 0     |
| SL_k141_56941                                | 1481  | No | NA | 0 | 0 | Not-determined | Genome-fragment | NA | 0     |
| SL_k141_189199                               | 1222  | No | NA | 0 | 0 | Not-determined | Genome-fragment | NA | 0     |
| SL_k141_386234                               | 1573  | No | NA | 0 | 1 | Not-determined | Genome-fragment | NA | 0     |
| SL_k141_232192                               | 4265  | No | NA | 0 | 3 | Not-determined | Genome-fragment | NA | 0     |
| SL_k141_304489                               | 1726  | No | NA | 0 | 1 | Not-determined | Genome-fragment | NA | 0     |
| SL_k141_369418                               | 1538  | No | NA | 0 | 0 | Not-determined | Genome-fragment | NA | 0     |
| SL_k141_270869                               | 1922  | No | NA | 0 | 0 | Not-determined | Genome-fragment | NA | 0     |
| SL_k141_221626                               | 10640 | No | NA | 0 | 1 | Not-determined | Genome-fragment | NA | 0     |
| SL_k141_72730                                | 1064  | No | NA | 0 | 0 | Not-determined | Genome-fragment | NA | 0     |
| SL_k141_7700                                 | 30471 | No | NA | 0 | 8 | Not-determined | Genome-fragment | NA | 0     |
| SL_k141_189234                               | 12325 | No | NA | 0 | 7 | Not-determined | Genome-fragment | NA | 0     |
| S8_k141_64681                                | 1475  | No | NA | 2 | 0 | Low-quality    | Genome-fragment | NA | 3.08  |
| SL_k141_353862                               | 1174  | No | NA | 0 | 1 | Not-determined | Genome-fragment | NA | 0     |
| SL_k141_155467                               | 1363  | No | NA | 0 | 1 | Not-determined | Genome-fragment | NA | 0     |
| SL_k141_57068                                | 1137  | No | NA | 0 | 0 | Not-determined | Genome-fragment | NA | 0     |
| SL_k141_189258                               | 2813  | No | NA | 0 | 2 | Not-determined | Genome-fragment | NA | 0     |
| SL_k141_205794                               | 1427  | No | NA | 0 | 1 | Not-determined | Genome-fragment | NA | 0     |
| SL_k141_89770                                | 1280  | No | NA | 0 | 1 | Not-determined | Genome-fragment | NA | 0     |
| SL_k141_386360                               | 3950  | No | NA | 0 | 0 | Not-determined | Genome-fragment | NA | 0     |
| SL_k141_40330                                | 1724  | No | NA | 0 | 0 | Not-determined | Genome-fragment | NA | 0     |
| SL_k141_235950                               | 1158  | No | NA | 0 | 2 | Not-determined | Genome-fragment | NA | 0     |
| SL_k141_221731                               | 1042  | No | NA | 0 | 2 | Not-determined | Genome-fragment | NA | 0     |
| SL_k141_386385                               | 1834  | No | NA | 0 | 0 | Not-determined | Genome-fragment | NA | 0     |
| SL_k141_386177                               | 1278  | No | NA | 0 | 0 | Not-determined | Genome-fragment | NA | 0     |
| SL_k141_72760                                | 2876  | No | NA | 0 | 1 | Not-determined | Genome-fragment | NA | 0     |
| SL_k141_221757                               | 2496  | No | NA | 0 | 0 | Not-determined | Genome-fragment | NA | 0     |
| SL_k141_270973                               | 3317  | No | NA | 0 | 2 | Not-determined | Genome-fragment | NA | 0     |
| SL_k141_106675                               | 1308  | No | NA | 0 | 1 | Not-determined | Genome-fragment | NA | 0     |
| SL_k141_238292                               | 4146  | No | NA | 0 | 0 | Not-determined | Genome-fragment | NA | 0     |
| SL_k141_105702                               | 3054  | No | NA | 0 | 2 | Not-determined | Genome-fragment | NA | 0     |
| S9-final-viral-combined_k141_29136  full     | 1476  | No | NA | 0 | 0 | Low-quality    | Genome-fragment | NA | 3.57  |
| SL_k141_354014                               | 5130  | No | NA | 0 | 3 | Not-determined | Genome-fragment | NA | 0     |
| SL_k141_189419                               | 1382  | No | NA | 0 | 1 | Not-determined | Genome-fragment | NA | 0     |
| SL_k141_139920                               | 1803  | No | NA | 0 | 1 | Not-determined | Genome-fragment | NA | 0     |
| SL_k141_139931                               | 1534  | No | NA | 0 | 0 | Not-determined | Genome-fragment | NA | 0     |
| SL_k141_40429                                | 4226  | No | NA | 0 | 2 | Not-determined | Genome-fragment | NA | 0     |
| SL_k141_221834                               | 1953  | No | NA | 0 | 0 | Not-determined | Genome-fragment | NA | 0     |
| S9-final-viral-combined_k141_110343  full    | 1476  | No | NA | 2 | 0 | Low-quality    | Genome-fragment | NA | 3.21  |
| SL-final-viral-combined_k141_294977  full    | 1476  | No | NA | 0 | 0 | Low-quality    | Genome-fragment | NA | 4.22  |
| SL_k141_155604                               | 2156  | No | NA | 0 | 0 | Not-determined | Genome-fragment | NA | 0     |
| SL_k141_24041                                | 1062  | No | NA | 0 | 0 | Not-determined | Genome-fragment | NA | 0     |
| SL_k141_51945                                | 1476  | No | NA | 0 | 0 | Low-quality    | Genome-fragment | NA | 3.3   |
| SL_k141_7963                                 | 2989  | No | NA | 0 | 1 | Not-determined | Genome-fragment | NA | 0     |
| SL_k141_269649                               | 2309  | No | NA | 0 | 0 | Not-determined | Genome-fragment | NA | 0     |
| SL_k141_155672                               | 1050  | No | NA | 0 | 1 | Not-determined | Genome-fragment | NA | 0     |
| SL_k141_7979                                 | 3491  | No | NA | 0 | 3 | Not-determined | Genome-fragment | NA | 0     |
| SL_k141_171611                               | 1586  | No | NA | 0 | 0 | Not-determined | Genome-fragment | NA | 0     |
| SL_k141_221879                               | 1256  | No | NA | 0 | 1 | Not-determined | Genome-fragment | NA | 0     |
| S5-final-viral-combined_k141_141931  full    | 1476  | No | NA | 2 | 0 | Low-quality    | Genome-fragment | NA | 2.44  |
| SL_k141_155712                               | 3508  | No | NA | 0 | 1 | Not-determined | Genome-fragment | NA | 0     |
| SL_k141_369684                               | 4047  | No | NA | 0 | 8 | Not-determined | Genome-fragment | NA | 0     |
| SL_k141_238468                               | 1431  | No | NA | 0 | 1 | Not-determined | Genome-fragment | NA | 0     |
| SL_k141_105829                               | 1451  | No | NA | 0 | 0 | Not-determined | Genome-fragment | NA | 0     |
| SL_k141_236387                               | 2123  | No | NA | 0 | 2 | Not-determined | Genome-fragment | NA | 0     |
| SL_k141_287648                               | 1845  | No | NA | 0 | 2 | Not-determined | Genome-fragment | NA | 0     |
| S7_k141_104547                               | 1476  | No | NA | 0 | 0 | Low-quality    | Genome-fragment | NA | 2.14  |
| SL_k141_271238                               | 1160  | No | NA | 0 | 0 | Not-determined | Genome-fragment | NA | 0     |
| S17-final-viral-combined_k141_222385  full   | 1476  | No | NA | 0 | 0 | Low-quality    | Genome-fragment | NA | 3.63  |
| SL_k141_255433                               | 1262  | No | NA | 0 | 1 | Not-determined | Genome-fragment | NA | 0     |
| SL_k141_171695                               | 1323  | No | NA | 0 | 0 | Not-determined | Genome-fragment | NA | 0     |
| SL_k141_57248                                | 1259  | No | NA | 0 | 0 | Not-determined | Genome-fragment | NA | 0     |
| S17-k141_31485                               | 1476  | No | NA | 2 | 0 | Low-quality    | Genome-fragment | NA | 5.38  |
| S1-final-viral-combined_k141_289920  full    | 1477  | No | NA | 0 | 0 | Low-quality    | Genome-fragment | NA | 3.79  |
| SL_k141_321801                               | 1111  | No | NA | 0 | 0 | Not-determined | Genome-fragment | NA | 0     |
| SL_k141_304861                               | 9729  | No | NA | 0 | 1 | Not-determined | Genome-fragment | NA | 0     |
| SL_k141_171726                               | 1286  | No | NA | 0 | 1 | Not-determined | Genome-fragment | NA | 0     |
| SL_k141_399797                               | 1034  | No | NA | 0 | 0 | Not-determined | Genome-fragment | NA | 0     |
| SL_k141_321835                               | 2189  | No | NA | 0 | 2 | Not-determined | Genome-fragment | NA | 0     |
| S5-final-viral-combined_k141_207005  full    | 1477  | No | NA | 0 | 0 | Low-quality    | Genome-fragment | NA | 2.82  |
| SL_k141_386714                               | 1266  | No | NA | 0 | 1 | Not-determined | Genome-fragment | NA | 0     |
| SL_k141_105940                               | 3570  | No | NA | 0 | 0 | Not-determined | Genome-fragment | NA | 0     |
| SL_k141_8164                                 | 1583  | No | NA | 0 | 1 | Not-determined | Genome-fragment | NA | 0     |
| SL_k141_206094                               | 1523  | No | NA | 0 | 1 | Not-determined | Genome-fragment | NA | 0     |
| SL_k141_304925                               | 1308  | No | NA | 0 | 1 | Not-determined | Genome-fragment | NA | 0     |
| SL_k141_90126                                | 3432  | No | NA | 0 | 1 | Not-determined | Genome-fragment | NA | 0     |
| SL_k141_90161                                | 1145  | No | NA | 0 | 2 | Not-determined | Genome-fragment | NA | 0     |
| SL_k141_304960                               | 3045  | No | NA | 0 | 2 | Not-determined | Genome-fragment | NA | 0     |
| S7-final-viral-combined_k141_243164  full    | 1477  | No | NA | 0 | 0 | Low-quality    | Genome-fragment | NA | 3.43  |
| SL_k141_287830                               | 1014  | No | NA | 0 | 1 | Not-determined | Genome-fragment | NA | 0     |
| SL_k141_171785                               | 1032  | No | NA | 0 | 1 | Not-determined | Genome-fragment | NA | 0     |
| S17-final-viral-combined_k141_156193  full   | 1477  | No | NA | 1 | 0 | Low-quality    | Genome-fragment | NA | 2.1   |
| S17-final-viral-combined_k141_227357  full   | 1477  | No | NA | 0 | 1 | Low-quality    | Genome-fragment | NA | 0.62  |
| SL_k141_287842                               | 1428  | No | NA | 0 | 1 | Not-determined | Genome-fragment | NA | 0     |
| SL_k141_369982                               | 1205  | No | NA | 0 | 1 | Not-determined | Genome-fragment | NA | 0     |
| S17-final-viral-combined_k141_210942  full   | 1477  | No | NA | 0 | 0 | Low-quality    | Genome-fragment | NA | 2.44  |
| S17-final-viral-combined_k141_97288  full    | 1477  | No | NA | 0 | 0 | Low-quality    | Genome-fragment | NA | 2.75  |
| SL_k141_73166                                | 9961  | No | NA | 0 | 1 | Not-determined | Genome-fragment | NA | 0     |
| SL_k141_222008                               | 1023  | No | NA | 0 | 1 | Not-determined | Genome-fragment | NA | 0     |
| SL_k141_305016                               | 1232  | No | NA | 0 | 0 | Not-determined | Genome-fragment | NA | 0     |
| SL_k141_354176                               | 1105  | No | NA | 0 | 1 | Not-determined | Genome-fragment | NA | 0     |
| SL_k141_189811                               | 1775  | No | NA | 0 | 0 | Not-determined | Genome-fragment | NA | 0     |
| SL_k141_73204                                | 1151  | No | NA | 0 | 0 | Not-determined | Genome-fragment | NA | 0     |
| SL_k141_189847                               | 1118  | No | NA | 0 | 1 | Not-determined | Genome-fragment | NA | 0     |
| SL_k141_140080                               | 1216  | No | NA | 0 | 0 | Not-determined | Genome-fragment | NA | 0     |
| S12-final-viral-combined_k141_361968  full   | 1477  | No | NA | 0 | 0 | Low-quality    | Genome-fragment | NA | 2.24  |
| SL_k141_171835                               | 1028  | No | NA | 0 | 0 | Not-determined | Genome-fragment | NA | 0     |
| SL_k141_212969                               | 7511  | No | NA | 0 | 8 | Not-determined | Genome-fragment | NA | 0     |
| SL_k141_124253                               | 1171  | No | NA | 0 | 1 | Not-determined | Genome-fragment | NA | 0     |
| SL_k141_354275                               | 1128  | No | NA | 0 | 1 | Not-determined | Genome-fragment | NA | 0     |
| SL_k141_222104                               | 1372  | No | NA | 0 | 1 | Not-determined | Genome-fragment | NA | 0     |
| SL_k141_244278                               | 2802  | No | NA | 0 | 1 | Not-determined | Genome-fragment | NA | 0     |
| SL_k141_386908                               | 1769  | No | NA | 0 | 1 | Not-determined | Genome-fragment | NA | 0     |
| S8-final-viral-combined_k141_57029  full     | 1477  | No | NA | 0 | 1 | Low-quality    | Genome-fragment | NA | 0.72  |
| S8-final-viral-combined_k141_97288  full     | 1477  | No | NA | 0 | 0 | Low-quality    | Genome-fragment | NA | 0     |
| S11-final-viral-combined_k141_89401  full    | 1478  | No | NA | 1 | 2 | Low-quality    | Genome-fragment | NA | 1.39  |
| SL_k141_238887                               | 1168  | No | NA | 0 | 1 | Not-determined | Genome-fragment | NA | 0     |
| SL_k141_124240                               | 1051  | No | NA | 0 | 0 | Not-determined | Genome-fragment | NA | 0     |
| SL_k141_73288                                | 2363  | No | NA | 0 | 1 | Not-determined | Genome-fragment | NA | 0     |
| SL_k141_90282                                | 3097  | No | NA | 0 | 3 | Not-determined | Genome-fragment | NA | 0     |
| SL_k141_222070                               | 1028  | No | NA | 0 | 0 | Not-determined | Genome-fragment | NA | 0     |
| SL_k141_106115                               | 26905 | No | NA | 7 | 0 | Medium-quality | Genome-fragment | NA | 78.86 |
| S1-final-viral-combined_k141_299305  1/2gene | 1478  | No | NA | 1 | 0 | Low-quality    | Genome-fragment | NA | 1.02  |
| SL_k141_255757                               | 1163  | No | NA | 0 | 0 | Not-determined | Genome-fragment | NA | 0     |
| SL_k141_574330                               | 6268  | No | NA | 0 | 2 | Not-determined | Genome-fragment | NA | 0     |
| SL_k141_305123                               | 1108  | No | NA | 0 | 3 | Not-determined | Genome-fragment | NA | 0     |
| SL_k141_222240                               | 1580  | No | NA | 0 | 1 | Not-determined | Genome-fragment | NA | 0     |
| SL_k141_206400                               | 1266  | No | NA | 0 | 1 | Not-determined | Genome-fragment | NA | 0     |
| SL_k141_171938                               | 6123  | No | NA | 0 | 1 | Not-determined | Genome-fragment | NA | 0     |
| SL_k141_62303                                | 1478  | No | NA | 0 | 0 | Low-quality    | Genome-fragment | NA | 0.97  |
| SL_k141_40761                                | 3297  | No | NA | 0 | 1 | Not-determined | Genome-fragment | NA | 0     |
| S7-final-viral-combined_k141_158064  full    | 1478  | No | NA | 0 | 0 | Low-quality    | Genome-fragment | NA | 2.67  |
| S7-final-viral-combined_k141_46309  full     | 1478  | No | NA | 0 | 0 | Low-quality    | Genome-fragment | NA | 3.06  |
| S7_k141_235807                               | 1478  | No | NA | 0 | 1 | Low-quality    | Genome-fragment | NA | 2.6   |
| SL_k141_73105                                | 2220  | No | NA | 0 | 2 | Not-determined | Genome-fragment | NA | 0     |
| S17-final-viral-combined_k141_111596  full   | 1478  | No | NA | 0 | 0 | Low-quality    | Genome-fragment | NA | 3.64  |
| S17-final-viral-combined_k141_135192  full   | 1478  | No | NA | 0 | 2 | Low-quality    | Genome-fragment | NA | 3.73  |
| SL_k141_387063                               | 3415  | No | NA | 0 | 0 | Not-determined | Genome-fragment | NA | 0     |
| SL_k141_387064                               | 1347  | No | NA | 0 | 0 | Not-determined | Genome-fragment | NA | 0     |
| SL_k141_90345                                | 1291  | No | NA | 0 | 2 | Not-determined | Genome-fragment | NA | 0     |
| S17-final-viral-combined_k141_161676  full   | 1478  | No | NA | 0 | 0 | Low-quality    | Genome-fragment | NA | 3.62  |
| SL_k141_106193                               | 2243  | No | NA | 0 | 0 | Not-determined | Genome-fragment | NA | 0     |
| SL_k141_106201                               | 1657  | No | NA | 0 | 1 | Not-determined | Genome-fragment | NA | 0     |
| SL_k141_564498                               | 1648  | No | NA | 0 | 2 | Not-determined | Genome-fragment | NA | 0     |
| SL_k141_245330                               | 4667  | No | NA | 0 | 1 | Not-determined | Genome-fragment | NA | 0     |
| SL_k141_57495                                | 3248  | No | NA | 0 | 1 | Not-determined | Genome-fragment | NA | 0     |
| SL_k141_106233                               | 1014  | No | NA | 0 | 0 | Not-determined | Genome-fragment | NA | 0     |
| SL_k141_90382                                | 2958  | No | NA | 0 | 2 | Not-determined | Genome-fragment | NA | 0     |
| SL_k141_40850                                | 1027  | No | NA | 0 | 1 | Not-determined | Genome-fragment | NA | 0     |
| SL_k141_155841                               |       |    |    |   |   |                |                 |    |       |



|                                       |       |    |    |   |   |                |                 |      |   |
|---------------------------------------|-------|----|----|---|---|----------------|-----------------|------|---|
| SL_k141_24860                         | 1129  | No | NA | 0 | 0 | Not-determined | Genome-fragment | NA   | 0 |
| SL_k141_239228                        | 1082  | No | NA | 0 | 0 | Not-determined | Genome-fragment | NA   | 0 |
| SL_k141_206693                        | 3467  | No | NA | 0 | 2 | Not-determined | Genome-fragment | NA   | 0 |
| SL2-final-viral-combined_k141_366666  | 1479  | No | NA | 2 | 0 | Low-quality    | Genome-fragment | 3.41 | 0 |
| SL_k141_206720                        | 1809  | No | NA | 0 | 0 | Not-determined | Genome-fragment | NA   | 0 |
| SL_k141_370496                        | 1243  | No | NA | 0 | 2 | Not-determined | Genome-fragment | NA   | 0 |
| SL_k141_305535                        | 1399  | No | NA | 0 | 0 | Not-determined | Genome-fragment | NA   | 0 |
| SL2-final-viral-combined_k141_171239  | 1479  | No | NA | 1 | 0 | Low-quality    | Genome-fragment | 4.64 | 0 |
| SL_k141_24885                         | 3173  | No | NA | 0 | 0 | Not-determined | Genome-fragment | NA   | 0 |
| SL4-final-viral-combined_k141_105080  | 1479  | No | NA | 0 | 1 | Low-quality    | Genome-fragment | 1.1  | 0 |
| SL3-final-viral-combined_k141_57879   | 1480  | No | NA | 0 | 1 | Low-quality    | Genome-fragment | 0.91 | 0 |
| SL_k141_90701                         | 2632  | No | NA | 0 | 0 | Not-determined | Genome-fragment | NA   | 0 |
| SL_k141_156050                        | 6820  | No | NA | 0 | 0 | Not-determined | Genome-fragment | NA   | 0 |
| SL_k141_354719                        | 1305  | No | NA | 0 | 0 | Not-determined | Genome-fragment | NA   | 0 |
| SL_k141_305564                        | 1780  | No | NA | 0 | 1 | Not-determined | Genome-fragment | NA   | 0 |
| SL_k141_370537                        | 4004  | No | NA | 0 | 2 | Not-determined | Genome-fragment | NA   | 0 |
| SL_k141_24915                         | 1049  | No | NA | 0 | 1 | Not-determined | Genome-fragment | NA   | 0 |
| SL_k141_124821                        | 1716  | No | NA | 0 | 0 | Not-determined | Genome-fragment | NA   | 0 |
| SL_k141_206805                        | 1070  | No | NA | 0 | 0 | Not-determined | Genome-fragment | NA   | 0 |
| SL_k141_271859                        | 1267  | No | NA | 0 | 1 | Not-determined | Genome-fragment | NA   | 0 |
| SL_k141_57719                         | 1953  | No | NA | 0 | 1 | Not-determined | Genome-fragment | NA   | 0 |
| SL_k141_206811                        | 4624  | No | NA | 0 | 2 | Not-determined | Genome-fragment | NA   | 0 |
| SL5-final-viral-combined_k141_135667  | 1480  | No | NA | 0 | 0 | Low-quality    | Genome-fragment | 1.64 | 0 |
| SL7-final-viral-combined_k141_131406  | 1480  | No | NA | 0 | 0 | Low-quality    | Genome-fragment | 3.7  | 0 |
| SL_k141_206864                        | 10080 | No | NA | 0 | 6 | Not-determined | Genome-fragment | NA   | 0 |
| SL_k141_57781                         | 2569  | No | NA | 0 | 1 | Not-determined | Genome-fragment | NA   | 0 |
| SL17-final-viral-combined_k141_174031 | 1480  | No | NA | 0 | 1 | Low-quality    | Genome-fragment | 0.88 | 0 |
| SL_k141_41293                         | 1145  | No | NA | 0 | 2 | Not-determined | Genome-fragment | NA   | 0 |
| SL_k141_239426                        | 1256  | No | NA | 0 | 0 | Not-determined | Genome-fragment | NA   | 0 |
| SL_k141_73727                         | 1608  | No | NA | 0 | 1 | Not-determined | Genome-fragment | NA   | 0 |
| SL_k141_222733                        | 1095  | No | NA | 0 | 1 | Not-determined | Genome-fragment | NA   | 0 |
| SL_k141_239438                        | 1152  | No | NA | 0 | 1 | Not-determined | Genome-fragment | NA   | 0 |
| SL2-final-viral-combined_k141_175444  | 1480  | No | NA | 0 | 2 | Low-quality    | Genome-fragment | 0.81 | 0 |
| SL_k141_288518                        | 1875  | No | NA | 0 | 1 | Not-determined | Genome-fragment | NA   | 0 |
| SL4-final-viral-combined_k141_82837   | 1480  | No | NA | 0 | 0 | Low-quality    | Genome-fragment | 3.57 | 0 |
| SL_k141_354884                        | 1252  | No | NA | 0 | 0 | Not-determined | Genome-fragment | NA   | 0 |
| SL_k141_140569                        | 1074  | No | NA | 0 | 1 | Not-determined | Genome-fragment | NA   | 0 |
| SL_k141_124961                        | 1158  | No | NA | 0 | 0 | Not-determined | Genome-fragment | NA   | 0 |
| SL_k141_124968                        | 4343  | No | NA | 0 | 0 | Not-determined | Genome-fragment | NA   | 0 |
| SL_k141_8955                          | 3790  | No | NA | 0 | 1 | Not-determined | Genome-fragment | NA   | 0 |
| SL_k141_370747                        | 1115  | No | NA | 0 | 0 | Not-determined | Genome-fragment | NA   | 0 |
| SL_k141_95147                         | 1480  | No | NA | 0 | 1 | Low-quality    | Genome-fragment | 0.71 | 0 |
| SL8-final-viral-combined_k141_231764  | 1480  | No | NA | 0 | 0 | Low-quality    | Genome-fragment | 3.41 | 0 |
| SL_k141_206968                        | 5374  | No | NA | 0 | 1 | Not-determined | Genome-fragment | NA   | 0 |
| SL_k141_73747                         | 1874  | No | NA | 0 | 2 | Not-determined | Genome-fragment | NA   | 0 |
| SL_k141_8958                          | 3058  | No | NA | 0 | 1 | Not-determined | Genome-fragment | NA   | 0 |
| SL_k141_305822                        | 2640  | No | NA | 0 | 1 | Not-determined | Genome-fragment | NA   | 0 |
| SL_k141_125031                        | 1116  | No | NA | 0 | 1 | Not-determined | Genome-fragment | NA   | 0 |
| SL_k141_579024                        | 1015  | No | NA | 0 | 2 | Not-determined | Genome-fragment | NA   | 0 |
| SL_k141_90974                         | 1031  | No | NA | 0 | 0 | Not-determined | Genome-fragment | NA   | 0 |
| SL_k141_106579                        | 4621  | No | NA | 0 | 0 | Not-determined | Genome-fragment | NA   | 0 |
| SL_k141_235545                        | 2200  | No | NA | 0 | 0 | Not-determined | Genome-fragment | NA   | 0 |
| SL_k141_288652                        | 1040  | No | NA | 0 | 0 | Not-determined | Genome-fragment | NA   | 0 |
| SL8-final-viral-combined_k141_60347   | 1480  | No | NA | 0 | 1 | Low-quality    | Genome-fragment | 2.75 | 0 |
| SL_k141_73824                         | 1229  | No | NA | 0 | 1 | Not-determined | Genome-fragment | NA   | 0 |
| SL_k141_25184                         | 1012  | No | NA | 0 | 1 | Not-determined | Genome-fragment | NA   | 0 |
| SL_k141_222845                        | 1820  | No | NA | 0 | 4 | Not-determined | Genome-fragment | NA   | 0 |
| SL_k141_125103                        | 1170  | No | NA | 0 | 0 | Not-determined | Genome-fragment | NA   | 0 |
| SL_k141_322616                        | 1395  | No | NA | 0 | 0 | Not-determined | Genome-fragment | NA   | 0 |
| SL8-final-viral-combined_k141_264487  | 1480  | No | NA | 0 | 0 | Low-quality    | Genome-fragment | 2.22 | 0 |
| SL_k141_305911                        | 1149  | No | NA | 0 | 1 | Not-determined | Genome-fragment | NA   | 0 |
| SL_k141_288699                        | 1488  | No | NA | 0 | 1 | Not-determined | Genome-fragment | NA   | 0 |
| SL_k141_207046                        | 1076  | No | NA | 0 | 1 | Not-determined | Genome-fragment | NA   | 0 |
| SL_k141_73859                         | 1341  | No | NA | 0 | 0 | Not-determined | Genome-fragment | NA   | 0 |
| SL_k141_370915                        | 1157  | No | NA | 0 | 0 | Not-determined | Genome-fragment | NA   | 0 |
| SL_k141_125128                        | 1464  | No | NA | 0 | 0 | Not-determined | Genome-fragment | NA   | 0 |
| SL_k141_222898                        | 1212  | No | NA | 0 | 0 | Not-determined | Genome-fragment | NA   | 0 |
| SL_k141_4615                          | 1480  | No | NA | 1 | 0 | Low-quality    | Genome-fragment | 2.37 | 0 |
| SL_k141_272176                        | 1431  | No | NA | 0 | 1 | Not-determined | Genome-fragment | NA   | 0 |
| SL_k141_58013                         | 1182  | No | NA | 0 | 1 | Not-determined | Genome-fragment | NA   | 0 |
| SL_k141_25217                         | 1505  | No | NA | 0 | 1 | Not-determined | Genome-fragment | NA   | 0 |
| SL_k141_256451                        | 1253  | No | NA | 0 | 0 | Not-determined | Genome-fragment | NA   | 0 |
| SL7-final-viral-combined_k141_13781   | 1481  | No | NA | 1 | 0 | Low-quality    | Genome-fragment | 2.76 | 0 |
| SL17-final-viral-combined_k141_113623 | 1481  | No | NA | 1 | 0 | Low-quality    | Genome-fragment | 2.52 | 0 |
| SL_k141_156369                        | 1034  | No | NA | 0 | 0 | Not-determined | Genome-fragment | NA   | 0 |
| SL17-final-viral-combined_k141_251966 | 1481  | No | NA | 1 | 0 | Low-quality    | Genome-fragment | 3.22 | 0 |
| SL_k141_125195                        | 1521  | No | NA | 0 | 1 | Not-determined | Genome-fragment | NA   | 0 |
| SL_k141_106726                        | 1315  | No | NA | 0 | 1 | Not-determined | Genome-fragment | NA   | 0 |
| SL_k141_387789                        | 3676  | No | NA | 0 | 1 | Not-determined | Genome-fragment | NA   | 0 |
| SL_k141_239674                        | 1384  | No | NA | 0 | 0 | Not-determined | Genome-fragment | NA   | 0 |
| SL_k141_207110                        | 1326  | No | NA | 0 | 0 | Not-determined | Genome-fragment | NA   | 0 |
| SL_k141_190812                        | 1412  | No | NA | 0 | 0 | Not-determined | Genome-fragment | NA   | 0 |
| SL_k141_256554                        | 1692  | No | NA | 0 | 2 | Not-determined | Genome-fragment | NA   | 0 |
| SL2_k141_127978                       | 1481  | No | NA | 0 | 1 | Low-quality    | Genome-fragment | 0.96 | 0 |
| SL_k141_222729                        | 1140  | No | NA | 0 | 0 | Not-determined | Genome-fragment | NA   | 0 |
| SL_k141_73961                         | 1159  | No | NA | 0 | 0 | Not-determined | Genome-fragment | NA   | 0 |
| SL_k141_172518                        | 1077  | No | NA | 0 | 1 | Not-determined | Genome-fragment | NA   | 0 |
| SL_k141_172528                        | 3362  | No | NA | 0 | 3 | Not-determined | Genome-fragment | NA   | 0 |
| SL_k141_272270                        | 1858  | No | NA | 0 | 0 | Not-determined | Genome-fragment | NA   | 0 |
| SL_k141_272272                        | 1330  | No | NA | 0 | 0 | Not-determined | Genome-fragment | NA   | 0 |
| SL_k141_73986                         | 2810  | No | NA | 0 | 1 | Not-determined | Genome-fragment | NA   | 0 |
| SL_k141_305096                        | 1569  | No | NA | 0 | 1 | Not-determined | Genome-fragment | NA   | 0 |
| SL_k141_222958                        | 1222  | No | NA | 0 | 0 | Not-determined | Genome-fragment | NA   | 0 |
| SL8-final-viral-combined_k141_153736  | 1481  | No | NA | 1 | 0 | Low-quality    | Genome-fragment | 2.39 | 0 |
| SL_k141_106752                        | 1307  | No | NA | 0 | 0 | Not-determined | Genome-fragment | NA   | 0 |
| SL8-final-viral-combined_k141_28866   | 1481  | No | NA | 0 | 0 | Low-quality    | Genome-fragment | 2.67 | 0 |
| SL11-final-viral-combined_k141_146725 | 1482  | No | NA | 1 | 0 | Low-quality    | Genome-fragment | 1.94 | 0 |
| SL_k141_41534                         | 1029  | No | NA | 0 | 1 | Not-determined | Genome-fragment | NA   | 0 |
| SL_k141_371325                        | 1576  | No | NA | 0 | 0 | Not-determined | Genome-fragment | NA   | 0 |
| SL1-final-viral-combined_k141_4299    | 1482  | No | NA | 0 | 0 | Low-quality    | Genome-fragment | 1.21 | 0 |
| SL_k141_172591                        | 1078  | No | NA | 0 | 1 | Not-determined | Genome-fragment | NA   | 0 |
| SL_k141_337422                        | 1094  | No | NA | 0 | 1 | Not-determined | Genome-fragment | NA   | 0 |
| SL_k141_91234                         | 1051  | No | NA | 0 | 2 | Not-determined | Genome-fragment | NA   | 0 |
| SL_k141_223034                        | 1063  | No | NA | 0 | 0 | Not-determined | Genome-fragment | NA   | 0 |
| SL_k141_91241                         | 1257  | No | NA | 0 | 1 | Not-determined | Genome-fragment | NA   | 0 |
| SL_k141_74036                         | 3340  | No | NA | 0 | 1 | Not-determined | Genome-fragment | NA   | 0 |
| SL_k141_306084                        | 1918  | No | NA | 0 | 1 | Not-determined | Genome-fragment | NA   | 0 |
| SL_k141_207244                        | 1116  | No | NA | 0 | 1 | Not-determined | Genome-fragment | NA   | 0 |
| SL_k141_387100                        | 7215  | No | NA | 0 | 0 | Not-determined | Genome-fragment | NA   | 0 |
| SL1-final-viral-combined_k141_140191  | 1482  | No | NA | 0 | 0 | Low-quality    | Genome-fragment | 3.13 | 0 |
| SL_k141_9127                          | 1239  | No | NA | 0 | 1 | Not-determined | Genome-fragment | NA   | 0 |
| SL1-final-viral-combined_k141_122299  | 1482  | No | NA | 1 | 0 | Low-quality    | Genome-fragment | 3.29 | 0 |
| SL_k141_371121                        | 4139  | No | NA | 0 | 1 | Not-determined | Genome-fragment | NA   | 0 |
| SL_k141_272400                        | 1401  | No | NA | 0 | 0 | Not-determined | Genome-fragment | NA   | 0 |
| SL_k141_280898                        | 1482  | No | NA | 0 | 0 | Low-quality    | Genome-fragment | 3.6  | 0 |
| SL_k141_190948                        | 1069  | No | NA | 0 | 1 | Not-determined | Genome-fragment | NA   | 0 |
| SL_k141_25488                         | 1501  | No | NA | 0 | 0 | Not-determined | Genome-fragment | NA   | 0 |
| SL_k141_140975                        | 1380  | No | NA | 0 | 2 | Not-determined | Genome-fragment | NA   | 0 |
| SL_k141_134149                        | 1482  | No | NA | 0 | 0 | Low-quality    | Genome-fragment | 1.88 | 0 |
| SL5-final-viral-combined_k141_77911   | 1482  | No | NA | 0 | 0 | Low-quality    | Genome-fragment | 2.87 | 0 |
| SL_k141_239821                        | 1011  | No | NA | 0 | 1 | Not-determined | Genome-fragment | NA   | 0 |
| SL_k141_207358                        | 3856  | No | NA | 0 | 0 | Not-determined | Genome-fragment | NA   | 0 |
| SL_k141_106929                        | 1192  | No | NA | 0 | 0 | Not-determined | Genome-fragment | NA   | 0 |
| SL_k141_208592                        | 1482  | No | NA | 0 | 1 | Low-quality    | Genome-fragment | 0.71 | 0 |
| SL_k141_125355                        | 1115  | No | NA | 0 | 1 | Not-determined | Genome-fragment | NA   | 0 |
| SL7-final-viral-combined_k141_40206   | 1482  | No | NA | 0 | 0 | Low-quality    | Genome-fragment | 2.08 | 0 |
| SL_k141_355256                        | 1116  | No | NA | 0 | 0 | Not-determined | Genome-fragment | NA   | 0 |
| SL17-final-viral-combined_k141_55769  | 1482  | No | NA | 1 | 0 | Low-quality    | Genome-fragment | 1.19 | 0 |
| SL_k141_191014                        | 1157  | No | NA | 0 | 1 | Not-determined | Genome-fragment | NA   | 0 |
| SL_k141_337616                        | 2548  | No | NA | 0 | 1 | Not-determined | Genome-fragment | NA   | 0 |
| SL_k141_91409                         | 1218  | No | NA | 0 | 1 | Not-determined | Genome-fragment | NA   | 0 |
| SL_k141_172792                        | 2121  | No | NA | 0 | 0 | Not-determined | Genome-fragment | NA   | 0 |
| SL_k141_288954                        | 1548  | No | NA | 0 | 0 | Not-determined | Genome-fragment | NA   | 0 |
| SL_k141_239871                        | 1039  | No | NA | 0 | 1 | Not-determined | Genome-fragment | NA   | 0 |
| SL_k141_207480                        | 1039  | No | NA | 0 | 0 | Not-determined | Genome-fragment | NA   | 0 |
| SL_k141_371256                        | 1039  | No | NA | 0 | 0 | Not-determined | Genome-fragment | NA   | 0 |
| SL_k141_141160                        | 1684  | No | NA | 0 | 1 | Not-determined | Genome-fragment | NA   | 0 |
| SL2-final-viral-combined_k141_343635  | 1482  | No | NA | 1 | 0 | Low-quality    | Genome-fragment | 3.7  | 0 |
| SL2-final-viral-combined_k141_60674   | 1482  | No | NA | 0 | 1 | Low-quality    | Genome-fragment | 3.22 | 0 |
| SL11-final-viral-combined_k141_195273 | 1483  | No | NA | 0 | 0 | Low-quality    | Genome-fragment | 2.09 | 0 |
| SL_k141_371273                        | 1051  | No | NA | 0 | 1 | Not-determined | Genome-fragment | NA   | 0 |
| SL11-final-viral-combined_k141_155774 | 1483  | No | NA | 0 | 0 | Low-quality    | Genome-fragment | 2.62 | 0 |
| SL_k141_58342                         | 1183  | No | NA | 0 | 0 | Not-determined | Genome-fragment | NA   | 0 |
| SL_k141_207507                        | 2216  | No | NA | 0 | 2 | Not-determined | Genome-fragment | NA   | 0 |
| SL_k141_74175                         | 2242  | No | NA | 0 | 0 | Not-determined | Genome-fragment | NA   | 0 |
| SL_k141_322996                        | 2117  | No | NA | 0 | 2 | Not-determined | Genome-fragment | NA   | 0 |
| SL_k141_156                           |       |    |    |   |   |                |                 |      |   |



|                                             |       |    |      |    |   |   |                |                 |    |       |
|---------------------------------------------|-------|----|------|----|---|---|----------------|-----------------|----|-------|
| SI_k141_388205                              | 1048  | No | NA   | 0  | 0 | 0 | Not-determined | Genome-fragment | NA | 0     |
| SI_k141_289195                              | 1993  | No | NA   | 0  | 0 | 0 | Not-determined | Genome-fragment | NA | 0     |
| SI_k141_289196                              | 1142  | No | NA   | 0  | 0 | 0 | Not-determined | Genome-fragment | NA | 0     |
| SI_k141_41918                               | 4137  | No | NA   | 0  | 0 | 2 | Not-determined | Genome-fragment | NA | 0     |
| S2-final-viral-combined_k141_130470  full   | 1483  | No | NA   | 0  | 0 | 0 | Low-quality    | Genome-fragment | NA | 3.19  |
| SI_k141_74763                               | 1483  | No | NA   | 0  | 0 | 0 | Low-quality    | Genome-fragment | NA | 0     |
| SI_k141_355675                              | 2083  | No | NA   | 0  | 0 | 2 | Not-determined | Genome-fragment | NA | 0     |
| S17-final-viral-combined_k141_259285  full  | 1483  | No | NA   | 0  | 0 | 0 | Low-quality    | Genome-fragment | NA | 2.39  |
| SI_k141_91732                               | 1005  | No | NA   | 0  | 0 | 0 | Not-determined | Genome-fragment | NA | 0     |
| SI2-final-viral-combined_k141_114366  full  | 1483  | No | NA   | 0  | 0 | 0 | Low-quality    | Genome-fragment | NA | 1.01  |
| S2-final-viral-combined_k141_125971  full   | 1483  | No | NA   | 0  | 0 | 1 | Low-quality    | Genome-fragment | NA | 1.96  |
| SI_k141_25780                               | 3684  | No | NA   | 0  | 0 | 0 | Not-determined | Genome-fragment | NA | 0     |
| SI_k141_207672                              | 3005  | No | NA   | 0  | 0 | 1 | Not-determined | Genome-fragment | NA | 0     |
| SI_k141_388292                              | 3129  | No | NA   | 0  | 0 | 0 | Medium-quality | Genome-fragment | NA | 51.19 |
| SI_k141_74530                               | 1051  | No | NA   | 0  | 0 | 1 | Not-determined | Genome-fragment | NA | 0     |
| SI_k141_289208                              | 3276  | No | NA   | 0  | 0 | 0 | Not-determined | Genome-fragment | NA | 0     |
| S2-final-viral-combined_k141_181770  full   | 1483  | No | NA   | 0  | 0 | 0 | Low-quality    | Genome-fragment | NA | 2.62  |
| SI_k141_257095                              | 1027  | No | NA   | 0  | 0 | 0 | Not-determined | Genome-fragment | NA | 0     |
| SI_k141_306402                              | 1112  | No | NA   | 0  | 0 | 1 | Not-determined | Genome-fragment | NA | 0     |
| SI_k141_58476                               | 5638  | No | NA   | 0  | 0 | 4 | Not-determined | Genome-fragment | NA | 0     |
| SI_k141_306403                              | 1850  | No | NA   | 0  | 0 | 0 | Not-determined | Genome-fragment | NA | 0     |
| SI_k141_289249                              | 3509  | No | NA   | 0  | 0 | 4 | Not-determined | Genome-fragment | NA | 0     |
| SI_k141_257134                              | 3141  | No | NA   | 0  | 0 | 0 | Not-determined | Genome-fragment | NA | 0     |
| SI_k141_257143                              | 1005  | No | NA   | 0  | 0 | 1 | Not-determined | Genome-fragment | NA | 0     |
| SI_k141_173160                              | 1067  | No | NA   | 0  | 0 | 0 | Not-determined | Genome-fragment | NA | 0     |
| SI_k141_141458                              | 1087  | No | NA   | 0  | 0 | 0 | Not-determined | Genome-fragment | NA | 0     |
| SI_k141_191366                              | 3662  | No | NA   | 0  | 0 | 4 | Not-determined | Genome-fragment | NA | 0     |
| SI_k141_25921                               | 1753  | No | NA   | 0  | 0 | 1 | Not-determined | Genome-fragment | NA | 0     |
| SI_k141_29923                               | 3088  | No | NA   | 0  | 0 | 2 | Not-determined | Genome-fragment | NA | 0     |
| SI_k141_25953                               | 3215  | No | NA   | 0  | 0 | 2 | Not-determined | Genome-fragment | NA | 0     |
| SI_k141_141492                              | 3183  | No | NA   | 0  | 0 | 1 | Not-determined | Genome-fragment | NA | 0     |
| SI_k141_306561                              | 1332  | No | NA   | 0  | 0 | 0 | Not-determined | Genome-fragment | NA | 0     |
| SI_k141_58596                               | 1275  | No | NA   | 0  | 0 | 1 | Not-determined | Genome-fragment | NA | 0     |
| SI_k141_223414                              | 3342  | No | NA   | 0  | 0 | 0 | Not-determined | Genome-fragment | NA | 0     |
| SI_k141_42112                               | 1018  | No | NA   | 0  | 0 | 1 | Not-determined | Genome-fragment | NA | 0     |
| SI_k141_125683                              | 1112  | No | NA   | 0  | 0 | 1 | Not-determined | Genome-fragment | NA | 0     |
| S6-final-viral-combined_k141_64198  full    | 1483  | No | NA   | 1  | 0 | 0 | Low-quality    | Genome-fragment | NA | 1.94  |
| S6_k141_77104                               | 1483  | No | NA   | 0  | 0 | 0 | Low-quality    | Genome-fragment | NA | 1.37  |
| SI_k141_306588                              | 1071  | No | NA   | 0  | 0 | 1 | Not-determined | Genome-fragment | NA | 0     |
| SI_k141_9977                                | 1154  | No | NA   | 0  | 0 | 0 | Not-determined | Genome-fragment | NA | 0     |
| SI_k141_223487                              | 3234  | No | NA   | 0  | 0 | 2 | Not-determined | Genome-fragment | NA | 0     |
| SI_k141_157028                              | 1208  | No | NA   | 0  | 0 | 2 | Not-determined | Genome-fragment | NA | 0     |
| SI_k141_107506                              | 1128  | No | NA   | 0  | 0 | 0 | Not-determined | Genome-fragment | NA | 0     |
| SI-final-viral-combined_k141_18251  full    | 1484  | No | NA   | 1  | 0 | 0 | Low-quality    | Genome-fragment | NA | 42.99 |
| SI_k141_240361                              | 1128  | No | NA   | 0  | 0 | 2 | Not-determined | Genome-fragment | NA | 0     |
| SI_k141_91866                               | 1385  | No | NA   | 0  | 0 | 1 | Not-determined | Genome-fragment | NA | 0     |
| SI_k141_240383                              | 1109  | No | NA   | 0  | 0 | 1 | Not-determined | Genome-fragment | NA | 0     |
| SI_k141_134637                              | 1484  | No | NA   | 0  | 0 | 0 | Low-quality    | Genome-fragment | NA | 3.22  |
| SI_k141_223487                              | 1775  | No | NA   | 0  | 0 | 3 | Not-determined | Genome-fragment | NA | 0     |
| SI_k141_208064                              | 5094  | No | NA   | 0  | 0 | 3 | Not-determined | Genome-fragment | NA | 0     |
| S7-final-viral-combined_k141_167095  full   | 1484  | No | NA   | 0  | 0 | 0 | Low-quality    | Genome-fragment | NA | 2.91  |
| SI_k141_157105                              | 1255  | No | NA   | 0  | 0 | 0 | Not-determined | Genome-fragment | NA | 0     |
| SI_k141_289593                              | 1319  | No | NA   | 0  | 0 | 0 | Not-determined | Genome-fragment | NA | 0     |
| SI_k141_191613                              | 1190  | No | NA   | 0  | 0 | 1 | Not-determined | Genome-fragment | NA | 0     |
| S7-final-viral-combined_k141_240531  H2gene | 1484  | No | NA   | 1  | 0 | 0 | Low-quality    | Genome-fragment | NA | 1.39  |
| SI_k141_223605                              | 1323  | No | NA   | 0  | 0 | 1 | Not-determined | Genome-fragment | NA | 0     |
| SI_k141_157173                              | 1172  | No | NA   | 0  | 0 | 1 | Not-determined | Genome-fragment | NA | 0     |
| SI2-final-viral-combined_k141_109501  full  | 1484  | No | NA   | 0  | 0 | 0 | Low-quality    | Genome-fragment | NA | 0.86  |
| SI_k141_208136                              | 1001  | No | NA   | 0  | 0 | 1 | Not-determined | Genome-fragment | NA | 0     |
| S2-final-viral-combined_k141_111915  full   | 1484  | No | NA   | 1  | 0 | 0 | Low-quality    | Genome-fragment | NA | 2.61  |
| SI_k141_42248                               | 1028  | No | NA   | 0  | 0 | 0 | Not-determined | Genome-fragment | NA | 0     |
| SI_k141_257294                              | 1276  | No | NA   | 0  | 0 | 1 | Not-determined | Genome-fragment | NA | 0     |
| SI_k141_173357                              | 1633  | No | NA   | 0  | 0 | 0 | Not-determined | Genome-fragment | NA | 0     |
| SI_k141_42290                               | 4600  | No | NA   | 0  | 0 | 1 | Not-determined | Genome-fragment | NA | 0     |
| SI_k141_223620                              | 3184  | No | NA   | 15 | 0 | 0 | High-quality   | Genome-fragment | NA | 96.36 |
| SI_k141_223643                              | 3175  | No | NA   | 0  | 0 | 1 | Not-determined | Genome-fragment | NA | 0     |
| SI_k141_92117                               | 2526  | No | NA   | 0  | 0 | 2 | Not-determined | Genome-fragment | NA | 0     |
| SI_k141_208193                              | 1187  | No | NA   | 0  | 0 | 1 | Not-determined | Genome-fragment | NA | 0     |
| SI_k141_58830                               | 3914  | No | NA   | 0  | 0 | 0 | Not-determined | Genome-fragment | NA | 0     |
| SI-final-viral-combined_k141_116860  full   | 1485  | No | NA   | 0  | 0 | 0 | Low-quality    | Genome-fragment | NA | 3.62  |
| SI_k141_157271                              | 1818  | No | NA   | 0  | 0 | 1 | Not-determined | Genome-fragment | NA | 0     |
| SI_k141_262466                              | 1552  | No | NA   | 0  | 0 | 1 | Not-determined | Genome-fragment | NA | 0     |
| SI_k141_323641                              | 1534  | No | NA   | 0  | 0 | 0 | Not-determined | Genome-fragment | NA | 0     |
| SI_k141_240529                              | 1497  | No | NA   | 0  | 0 | 1 | Not-determined | Genome-fragment | NA | 0     |
| SI_k141_107682                              | 2457  | No | NA   | 0  | 0 | 1 | Not-determined | Genome-fragment | NA | 0     |
| SI-final-viral-combined_k141_333605  full   | 1485  | No | NA   | 0  | 0 | 2 | Low-quality    | Genome-fragment | NA | 2.16  |
| SI_k141_356094                              | 1260  | No | NA   | 0  | 0 | 1 | Not-determined | Genome-fragment | NA | 0     |
| SI_k141_306879                              | 1017  | No | NA   | 0  | 0 | 1 | Not-determined | Genome-fragment | NA | 0     |
| SI_k141_157322                              | 1479  | No | NA   | 0  | 0 | 2 | Not-determined | Genome-fragment | NA | 0     |
| SI_k141_248018                              | 1485  | No | NA   | 1  | 0 | 0 | Low-quality    | Genome-fragment | NA | 5.09  |
| SI_k141_223682                              | 10659 | No | NA   | 0  | 0 | 5 | Not-determined | Genome-fragment | NA | 0     |
| SI_k141_289730                              | 1715  | No | NA   | 0  | 0 | 0 | Not-determined | Genome-fragment | NA | 0     |
| SI_k141_107726                              | 3387  | No | NA   | 0  | 0 | 1 | Not-determined | Genome-fragment | NA | 0     |
| SI_k141_42385                               | 1483  | No | NA   | 0  | 0 | 1 | Not-determined | Genome-fragment | NA | 0     |
| S5-final-viral-combined_k141_108018  full   | 1485  | No | NA   | 0  | 0 | 1 | Low-quality    | Genome-fragment | NA | 3.3   |
| SI_k141_26335                               | 3465  | No | NA   | 0  | 0 | 3 | Not-determined | Genome-fragment | NA | 0     |
| SI_k141_26350                               | 1108  | No | NA   | 0  | 0 | 0 | Not-determined | Genome-fragment | NA | 0     |
| SI_k141_208307                              | 3094  | No | NA   | 0  | 0 | 0 | Not-determined | Genome-fragment | NA | 0     |
| SI_k141_74789                               | 1266  | No | NA   | 0  | 0 | 0 | Not-determined | Genome-fragment | NA | 0     |
| SI_k141_289757                              | 1236  | No | NA   | 0  | 0 | 1 | Not-determined | Genome-fragment | NA | 0     |
| S5-final-viral-combined_k141_150713  full   | 1485  | No | NA   | 0  | 0 | 0 | Low-quality    | Genome-fragment | NA | 3.54  |
| SI_k141_42425                               | 1182  | No | NA   | 0  | 0 | 1 | Not-determined | Genome-fragment | NA | 0     |
| SI_k141_141629                              | 1631  | No | NA   | 0  | 0 | 1 | Not-determined | Genome-fragment | NA | 0     |
| SI_k141_371835                              | 1330  | No | NA   | 0  | 0 | 1 | Not-determined | Genome-fragment | NA | 0     |
| S17-final-viral-combined_k141_224926  full  | 1485  | No | NA   | 0  | 0 | 0 | Low-quality    | Genome-fragment | NA | 3.6   |
| SI_k141_240622                              | 1683  | No | NA   | 0  | 0 | 0 | Not-determined | Genome-fragment | NA | 0     |
| SI_k141_273080                              | 1752  | No | NA   | 0  | 0 | 2 | Not-determined | Genome-fragment | NA | 0     |
| SI_k141_208338                              | 1023  | No | NA   | 0  | 0 | 1 | Not-determined | Genome-fragment | NA | 0     |
| SI_k141_157417                              | 1595  | No | NA   | 0  | 0 | 1 | Not-determined | Genome-fragment | NA | 0     |
| SI2-final-viral-combined_k141_400839  full  | 1485  | No | NA   | 0  | 0 | 0 | Low-quality    | Genome-fragment | NA | 3.08  |
| SI_k141_208343                              | 3119  | No | NA   | 0  | 0 | 1 | Not-determined | Genome-fragment | NA | 0     |
| SI_k141_306977                              | 1129  | No | NA   | 0  | 0 | 1 | Not-determined | Genome-fragment | NA | 0     |
| SI_k141_58992                               | 1046  | No | NA   | 0  | 0 | 1 | Not-determined | Genome-fragment | NA | 0     |
| SI_k141_42475                               | 5283  | No | NA   | 0  | 0 | 1 | Not-determined | Genome-fragment | NA | 0     |
| S2_k141_115289                              | 1485  | No | NA   | 0  | 0 | 1 | Low-quality    | Genome-fragment | NA | 0.89  |
| SI_k141_42482                               | 8193  | No | NA   | 0  | 0 | 0 | Not-determined | Genome-fragment | NA | 0     |
| SI_k141_157462                              | 1148  | No | NA   | 0  | 0 | 1 | Not-determined | Genome-fragment | NA | 0     |
| SI_k141_141757                              | 3622  | No | NA   | 0  | 0 | 2 | Not-determined | Genome-fragment | NA | 0     |
| SI_k141_223868                              | 1290  | No | NA   | 0  | 0 | 1 | Not-determined | Genome-fragment | NA | 0     |
| SI_k141_356304                              | 1154  | No | NA   | 0  | 0 | 0 | Not-determined | Genome-fragment | NA | 0     |
| SI_k141_371966                              | 1090  | No | NA   | 0  | 0 | 0 | Not-determined | Genome-fragment | NA | 0     |
| SI_k141_26400                               | 1066  | No | NA   | 0  | 0 | 0 | Not-determined | Genome-fragment | NA | 0     |
| SI_k141_157496                              | 3001  | No | NA   | 0  | 0 | 1 | Not-determined | Genome-fragment | NA | 0     |
| S9-final-viral-combined_k141_17998  full    | 1486  | No | NA   | 0  | 0 | 2 | Low-quality    | Genome-fragment | NA | 1.2   |
| SI_k141_238427                              | 1215  | No | NA   | 0  | 0 | 1 | Not-determined | Genome-fragment | NA | 0     |
| SI_k141_323844                              | 2260  | No | NA   | 0  | 0 | 1 | Not-determined | Genome-fragment | NA | 0     |
| S9_k141_105694                              | 1486  | No | NA   | 0  | 0 | 1 | Low-quality    | Genome-fragment | NA | 0.95  |
| SI_k141_323856                              | 1321  | No | NA   | 0  | 0 | 0 | Not-determined | Genome-fragment | NA | 0     |
| SI_k141_257772                              | 1107  | No | NA   | 0  | 0 | 1 | Not-determined | Genome-fragment | NA | 0     |
| SI_k141_372014                              | 1848  | No | NA   | 0  | 0 | 1 | Not-determined | Genome-fragment | NA | 0     |
| SI_k141_173555                              | 1307  | No | NA   | 0  | 0 | 2 | Not-determined | Genome-fragment | NA | 0     |
| SI_k141_289967                              | 3542  | No | NA   | 0  | 0 | 1 | Not-determined | Genome-fragment | NA | 0     |
| SI_k141_240790                              | 2960  | No | NA   | 0  | 0 | 1 | Not-determined | Genome-fragment | NA | 0     |
| SI_k141_157576                              | 1046  | No | NA   | 0  | 0 | 0 | Not-determined | Genome-fragment | NA | 0     |
| SI_k141_356368                              | 4215  | No | NA   | 0  | 0 | 5 | Not-determined | Genome-fragment | NA | 0     |
| SI-final-viral-combined_k141_264947  full   | 1486  | No | NA   | 1  | 0 | 0 | Low-quality    | Genome-fragment | NA | 2.75  |
| SI_k141_92459                               | 6325  | No | NA   | 0  | 0 | 1 | Not-determined | Genome-fragment | NA | 0     |
| SI-final-viral-combined_k141_328153  full   | 1486  | No | NA   | 1  | 0 | 0 | Low-quality    | Genome-fragment | NA | 11.52 |
| SI-final-viral-combined_k141_81669  full    | 1486  | No | NA   | 1  | 0 | 0 | Low-quality    | Genome-fragment | NA | 0.77  |
| SI2-final-viral-combined_k141_3675  full    | 1486  | No | NA   | 0  | 0 | 0 | Low-quality    | Genome-fragment | NA | 3.93  |
| SI_k141_232949                              | 1176  | No | NA   | 0  | 0 | 2 | Not-determined | Genome-fragment | NA | 0     |
| SI_k141_26472                               | 1024  | No | NA   | 0  | 0 | 0 | Not-determined | Genome-fragment | NA | 0     |
| S2-final-viral-combined_k141_176727  full   | 1486  | No | NA   | 2  | 0 | 0 | Low-quality    | Genome-fragment | NA | 3.3   |
| SI_k141_26481                               | 1001  | No | NA   | 0  | 0 | 3 | Not-determined | Genome-fragment | NA | 0     |
| SI_k141_75051                               | 1656  | No | NA   | 0  | 0 | 0 | Not-determined | Genome-fragment | NA | 0     |
| SI_k141_290068                              | 1210  | No | NA   | 0  | 0 | 0 | Not-determined | Genome-fragment | NA | 0     |
| SI_k141_10353                               | 1124  | No | NA</ |    |   |   |                |                 |    |       |



|                                               |       |     |    |     |    |                |                 |    |       |
|-----------------------------------------------|-------|-----|----|-----|----|----------------|-----------------|----|-------|
| SI_k141_324248                                | 1018  | No  | NA | 0   | 1  | Not-determined | Genome-fragment | NA | 0     |
| SI_k141_192117                                | 4494  | No  | NA | 0   | 1  | Not-determined | Genome-fragment | NA | 0     |
| SI_k141_126468                                | 6594  | No  | NA | 0   | 5  | Not-determined | Genome-fragment | NA | 0     |
| SI_k141_42911                                 | 1071  | No  | NA | 0   | 1  | Not-determined | Genome-fragment | NA | 0     |
| SI7-final-viral-combined_k141_35700  full     | 1487  | No  | NA | 0   | 2  | Low-quality    | Genome-fragment | NA | 1.7   |
| SI_k141_241091                                | 1085  | No  | NA | 0   | 2  | Not-determined | Genome-fragment | NA | 0     |
| SI7-final-viral-combined_k141_48656  full     | 1487  | No  | NA | 0   | 0  | Low-quality    | Genome-fragment | NA | 3.15  |
| SI_k141_192164                                | 1020  | No  | NA | 0   | 2  | Not-determined | Genome-fragment | NA | 0     |
| SI7-final-viral-combined_k141_7838  full      | 1487  | Yes | NA | 1   | 1  | Low-quality    | Genome-fragment | NA | 0.2   |
| SI_k141_241131                                | 3465  | No  | NA | 423 | 3  | Not-determined | Genome-fragment | NA | 71.55 |
| SI_k141_92809                                 | 10998 | No  | NA | 0   | 8  | Not-determined | Genome-fragment | NA | 0     |
| SI_k141_142138                                | 1605  | No  | NA | 0   | 1  | Not-determined | Genome-fragment | NA | 0     |
| SI7-final-viral-combined_k141_252727  full    | 1487  | No  | NA | 2   | 0  | Low-quality    | Genome-fragment | NA | 3.18  |
| SI_k141_92852                                 | 1155  | No  | NA | 0   | 1  | Not-determined | Genome-fragment | NA | 0     |
| SI2-final-viral-combined_k141_49238  full     | 1487  | No  | NA | 0   | 2  | Low-quality    | Genome-fragment | NA | 2.49  |
| SI_k141_388771                                | 2977  | No  | NA | 0   | 1  | Not-determined | Genome-fragment | NA | 0     |
| SI_k141_388774                                | 1210  | No  | NA | 0   | 0  | Not-determined | Genome-fragment | NA | 0     |
| SI_k141_356733                                | 4811  | No  | NA | 0   | 2  | Not-determined | Genome-fragment | NA | 0     |
| SI_k141_208812                                | 1114  | No  | NA | 0   | 1  | Not-determined | Genome-fragment | NA | 0     |
| SI_k141_208814                                | 1729  | No  | NA | 0   | 0  | Not-determined | Genome-fragment | NA | 0     |
| SI_k141_273527                                | 2210  | No  | NA | 0   | 0  | Not-determined | Genome-fragment | NA | 0     |
| SI_k141_92901                                 | 3381  | No  | NA | 0   | 4  | Not-determined | Genome-fragment | NA | 0     |
| SI_k141_10426                                 | 2939  | No  | NA | 0   | 2  | Not-determined | Genome-fragment | NA | 0     |
| SI_k141_208863                                | 1044  | No  | NA | 0   | 1  | Not-determined | Genome-fragment | NA | 0     |
| SI_k141_157984                                | 3441  | No  | NA | 0   | 1  | Not-determined | Genome-fragment | NA | 0     |
| SI_k141_213031                                | 1487  | No  | NA | 0   | 1  | Low-quality    | Genome-fragment | NA | 1.76  |
| SI_k141_241248                                | 2422  | No  | NA | 0   | 2  | Not-determined | Genome-fragment | NA | 0     |
| SI_k141_241263                                | 2132  | No  | NA | 0   | 1  | Not-determined | Genome-fragment | NA | 0     |
| SI_k141_241267                                | 1236  | No  | NA | 0   | 1  | Not-determined | Genome-fragment | NA | 0     |
| SI_k141_75381                                 | 1077  | No  | NA | 0   | 1  | Not-determined | Genome-fragment | NA | 0     |
| SI_k141_208875                                | 18901 | No  | NA | 3   | 0  | Medium-quality | Genome-fragment | NA | 50.43 |
| SI_k141_290405                                | 1022  | No  | NA | 0   | 1  | Not-determined | Genome-fragment | NA | 0     |
| SI_k141_43071                                 | 1237  | No  | NA | 0   | 1  | Not-determined | Genome-fragment | NA | 0     |
| SI_k141_43079                                 | 3362  | No  | NA | 0   | 3  | Not-determined | Genome-fragment | NA | 0     |
| SI_k141_122835                                | 1487  | No  | NA | 0   | 0  | Low-quality    | Genome-fragment | NA | 1.05  |
| SI8-final-viral-combined_k141_195921  full    | 1487  | No  | NA | 0   | 1  | Low-quality    | Genome-fragment | NA | 1.67  |
| SI_k141_224464                                | 1013  | No  | NA | 0   | 2  | Not-determined | Genome-fragment | NA | 0     |
| SI_k141_388864                                | 1084  | No  | NA | 0   | 2  | Not-determined | Genome-fragment | NA | 0     |
| SI_k141_273594                                | 1873  | No  | NA | 0   | 0  | Not-determined | Genome-fragment | NA | 0     |
| SI_k141_158041                                | 1064  | No  | NA | 0   | 1  | Not-determined | Genome-fragment | NA | 0     |
| SI_k141_241333                                | 1411  | No  | NA | 0   | 1  | Not-determined | Genome-fragment | NA | 0     |
| SI_k141_59568                                 | 4455  | No  | NA | 0   | 3  | Not-determined | Genome-fragment | NA | 0     |
| SI_k141_93004                                 | 1013  | No  | NA | 0   | 1  | Not-determined | Genome-fragment | NA | 0     |
| SI_k141_356819                                | 1005  | No  | NA | 0   | 0  | Not-determined | Genome-fragment | NA | 0     |
| SI_k141_290442                                | 1285  | No  | NA | 0   | 0  | Not-determined | Genome-fragment | NA | 0     |
| SI_k141_174152                                | 4004  | No  | NA | 0   | 2  | Not-determined | Genome-fragment | NA | 0     |
| SI_k141_290464                                | 1282  | No  | NA | 0   | 0  | Not-determined | Genome-fragment | NA | 0     |
| SI8-final-viral-combined_k141_236609  full    | 1487  | No  | NA | 0   | 0  | Low-quality    | Genome-fragment | NA | 0.97  |
| SI_k141_356859                                | 3153  | No  | NA | 0   | 0  | Not-determined | Genome-fragment | NA | 0     |
| SI8_k141_253395                               | 1487  | No  | NA | 0   | 1  | Low-quality    | Genome-fragment | NA | 0.52  |
| SI_k141_126735                                | 3038  | No  | NA | 0   | 1  | Not-determined | Genome-fragment | NA | 0     |
| SI9-final-viral-combined_k141_10324  full     | 1488  | No  | NA | 2   | 0  | Low-quality    | Genome-fragment | NA | 2.35  |
| SI_k141_43186                                 | 3920  | No  | NA | 0   | 0  | Not-determined | Genome-fragment | NA | 0     |
| SI_k141_75498                                 | 1208  | No  | NA | 0   | 0  | Not-determined | Genome-fragment | NA | 0     |
| SI_k141_192409                                | 1024  | No  | NA | 0   | 1  | Not-determined | Genome-fragment | NA | 0     |
| SI_k141_43187                                 | 10589 | No  | NA | 0   | 10 | Not-determined | Genome-fragment | NA | 0     |
| SI_k141_174210                                | 1444  | No  | NA | 0   | 5  | Not-determined | Genome-fragment | NA | 0     |
| SI7-final-viral-combined_k141_87181  full     | 1488  | No  | NA | 1   | 0  | Low-quality    | Genome-fragment | NA | 4.38  |
| SI_k141_43205                                 | 1380  | No  | NA | 0   | 0  | Not-determined | Genome-fragment | NA | 0     |
| SI_k141_26850                                 | 5057  | No  | NA | 0   | 1  | Not-determined | Genome-fragment | NA | 0     |
| SI_k141_10635                                 | 1461  | No  | NA | 0   | 0  | Not-determined | Genome-fragment | NA | 0     |
| SI_k141_388936                                | 1248  | No  | NA | 0   | 0  | Not-determined | Genome-fragment | NA | 0     |
| SI9_k141_92635                                | 1488  | No  | NA | 0   | 1  | Low-quality    | Genome-fragment | NA | 0.97  |
| SI_k141_372652                                | 1626  | No  | NA | 0   | 0  | Not-determined | Genome-fragment | NA | 0     |
| SI_k141_126824                                | 1267  | No  | NA | 0   | 0  | Not-determined | Genome-fragment | NA | 0     |
| SI_k141_388959                                | 2065  | No  | NA | 0   | 0  | Not-determined | Genome-fragment | NA | 0     |
| SI_k141_224579                                | 11026 | No  | NA | 0   | 7  | Not-determined | Genome-fragment | NA | 0     |
| SI_k141_93131                                 | 13777 | No  | NA | 0   | 3  | Not-determined | Genome-fragment | NA | 0     |
| SI_k141_39897                                 | 1488  | No  | NA | 0   | 1  | Low-quality    | Genome-fragment | NA | 2.76  |
| SI_k141_209086                                | 1433  | No  | NA | 0   | 1  | Not-determined | Genome-fragment | NA | 0     |
| SI2-final-viral-combined_k141_301624  full    | 1488  | No  | NA | 0   | 0  | Low-quality    | Genome-fragment | NA | 1.61  |
| SI_k141_241380                                | 3616  | No  | NA | 0   | 2  | Not-determined | Genome-fragment | NA | 0     |
| SI_k141_26965                                 | 4474  | No  | NA | 0   | 0  | Not-determined | Genome-fragment | NA | 0     |
| SI_k141_224641                                | 1292  | No  | NA | 0   | 2  | Not-determined | Genome-fragment | NA | 0     |
| SI_k141_142169                                | 3543  | No  | NA | 0   | 1  | Not-determined | Genome-fragment | NA | 0     |
| SI_k141_43321                                 | 1582  | No  | NA | 0   | 1  | Not-determined | Genome-fragment | NA | 0     |
| SI_k141_126934                                | 1221  | No  | NA | 0   | 2  | Not-determined | Genome-fragment | NA | 0     |
| SI_k141_192547                                | 3269  | No  | NA | 0   | 2  | Not-determined | Genome-fragment | NA | 0     |
| SI_k141_126943                                | 10456 | No  | NA | 0   | 0  | Not-determined | Genome-fragment | NA | 0     |
| SI_k141_27013                                 | 1113  | No  | NA | 0   | 0  | Not-determined | Genome-fragment | NA | 0     |
| SI_k141_324588                                | 1594  | No  | NA | 0   | 1  | Not-determined | Genome-fragment | NA | 0     |
| SI_k141_372816                                | 1177  | No  | NA | 0   | 2  | Not-determined | Genome-fragment | NA | 0     |
| SI_k141_258556                                | 1487  | No  | NA | 0   | 0  | Not-determined | Genome-fragment | NA | 0     |
| SI_k141_258560                                | 2554  | No  | NA | 0   | 2  | Not-determined | Genome-fragment | NA | 0     |
| SI_k141_241501                                | 4128  | No  | NA | 0   | 1  | Not-determined | Genome-fragment | NA | 0     |
| SI2-final-viral-combined_k141_101135  full    | 1488  | No  | NA | 1   | 0  | Low-quality    | Genome-fragment | NA | 0.68  |
| SI_k141_241509                                | 1147  | No  | NA | 0   | 0  | Not-determined | Genome-fragment | NA | 0     |
| SI_k141_290680                                | 1789  | No  | NA | 0   | 2  | Not-determined | Genome-fragment | NA | 0     |
| SI2-final-viral-combined_k141_106113  full    | 1488  | No  | NA | 0   | 1  | Low-quality    | Genome-fragment | NA | 3.16  |
| SI_k141_59810                                 | 1327  | No  | NA | 0   | 1  | Not-determined | Genome-fragment | NA | 0     |
| SI_k141_389132                                | 2625  | No  | NA | 0   | 1  | Not-determined | Genome-fragment | NA | 0     |
| SI_k141_126977                                | 1553  | No  | NA | 0   | 0  | Not-determined | Genome-fragment | NA | 0     |
| SI_k141_27101                                 | 1328  | No  | NA | 0   | 0  | Not-determined | Genome-fragment | NA | 0     |
| SI_k141_290704                                | 1137  | No  | NA | 0   | 2  | Not-determined | Genome-fragment | NA | 0     |
| SI_k141_389143                                | 1781  | No  | NA | 0   | 1  | Not-determined | Genome-fragment | NA | 0     |
| SI2-final-viral-combined_k141_130126  H2gene  | 1488  | No  | NA | 1   | 0  | Low-quality    | Genome-fragment | NA | 3.61  |
| SI2_k141_73745                                | 1488  | No  | NA | 0   | 1  | Low-quality    | Genome-fragment | NA | 1.5   |
| SI_k141_209311                                | 3120  | No  | NA | 0   | 1  | Not-determined | Genome-fragment | NA | 0     |
| SI_k141_193531                                | 3243  | No  | NA | 0   | 1  | Not-determined | Genome-fragment | NA | 0     |
| SI11-final-viral-combined_k141_181773  H2gene | 1489  | No  | NA | 1   | 0  | Low-quality    | Genome-fragment | NA | 2.35  |
| SI_k141_389196                                | 1383  | No  | NA | 0   | 0  | Not-determined | Genome-fragment | NA | 0     |
| SI_k141_10975                                 | 1706  | No  | NA | 0   | 0  | Not-determined | Genome-fragment | NA | 0     |
| SI-final-viral-combined_k141_253917  full     | 1489  | No  | NA | 0   | 0  | Low-quality    | Genome-fragment | NA | 1.58  |
| SI_k141_224821                                | 8426  | No  | NA | 0   | 8  | Not-determined | Genome-fragment | NA | 0     |
| SI_k141_174403                                | 1607  | No  | NA | 0   | 1  | Not-determined | Genome-fragment | NA | 0     |
| SI_k141_258722                                | 1264  | No  | NA | 0   | 1  | Not-determined | Genome-fragment | NA | 0     |
| SI_k141_75727                                 | 1164  | No  | NA | 0   | 0  | Not-determined | Genome-fragment | NA | 0     |
| SI_k141_258741                                | 1074  | No  | NA | 0   | 0  | Not-determined | Genome-fragment | NA | 0     |
| SI_k141_142731                                | 1035  | No  | NA | 0   | 1  | Not-determined | Genome-fragment | NA | 0     |
| SI_k141_389237                                | 1125  | No  | NA | 0   | 1  | Not-determined | Genome-fragment | NA | 0     |
| SI_k141_62638                                 | 1489  | No  | NA | 0   | 0  | Low-quality    | Genome-fragment | NA | 3.05  |
| SI_k141_75779                                 | 5450  | No  | NA | 0   | 0  | Not-determined | Genome-fragment | NA | 0     |
| SI_k141_258805                                | 1052  | No  | NA | 0   | 2  | Not-determined | Genome-fragment | NA | 0     |
| SI_k141_307855                                | 4218  | No  | NA | 0   | 1  | Not-determined | Genome-fragment | NA | 0     |
| SI_k141_142757                                | 1082  | No  | NA | 0   | 0  | Not-determined | Genome-fragment | NA | 0     |
| SI_k141_373012                                | 1485  | No  | NA | 0   | 1  | Not-determined | Genome-fragment | NA | 0     |
| SI_k141_389270                                | 1455  | No  | NA | 0   | 0  | Not-determined | Genome-fragment | NA | 0     |
| SI_k141_209421                                | 1782  | No  | NA | 0   | 1  | Not-determined | Genome-fragment | NA | 0     |
| SI_k141_373022                                | 1086  | No  | NA | 0   | 0  | Not-determined | Genome-fragment | NA | 0     |
| SI_k141_174477                                | 3046  | No  | NA | 0   | 2  | Not-determined | Genome-fragment | NA | 0     |
| SI8-final-viral-combined_k141_185792  full    | 1489  | No  | NA | 0   | 0  | Low-quality    | Genome-fragment | NA | 3.65  |
| SI_k141_108985                                | 1857  | No  | NA | 0   | 1  | Not-determined | Genome-fragment | NA | 0     |
| SI_k141_290928                                | 1114  | No  | NA | 0   | 1  | Not-determined | Genome-fragment | NA | 0     |
| SI_k141_209461                                | 1222  | No  | NA | 0   | 0  | Not-determined | Genome-fragment | NA | 0     |
| SI7-final-viral-combined_k141_143106  full    | 1489  | No  | NA | 0   | 0  | Low-quality    | Genome-fragment | NA | 0.94  |
| SI_k141_43552                                 | 1046  | No  | NA | 0   | 0  | Not-determined | Genome-fragment | NA | 0     |
| SI_k141_75911                                 | 3407  | No  | NA | 0   | 4  | Not-determined | Genome-fragment | NA | 0     |
| SI_k141_307980                                | 3178  | No  | NA | 0   | 1  | Not-determined | Genome-fragment | NA | 0     |
| SI_k141_373087                                | 2051  | No  | NA | 0   | 0  | Not-determined | Genome-fragment | NA | 0     |
| SI_k141_357148                                | 3556  | No  | NA | 0   | 1  | Not-determined | Genome-fragment | NA | 0     |
| SI2-final-viral-combined_k141_354878  full    | 1489  | No  | NA | 0   | 0  | Low-quality    | Genome-fragment | NA | 2.25  |
| SI2-final-viral-combined_k141_254703  full    | 1489  | No  | NA | 0   | 0  | Low-quality    | Genome-fragment | NA | 2.94  |
| SI2-final-viral-combined_k141_122368  full    | 1489  | No  | NA | 0   | 0  | Low-quality    | Genome-fragment | NA | 2.97  |
| SI_k141_307994                                | 1152  | No  | NA | 0   | 1  | Not-determined | Genome-fragment | NA | 0     |
| SI_k141_324816                                | 1651  | No  | NA | 0   | 1  | Not-determined | Genome-fragment | NA | 0     |
| SI_k141_373101                                | 1168  | No  | NA | 0   | 0  | Not-determined | Genome-fragment | NA | 0     |
| SI_k141_127210                                | 1043  | No  | NA | 0   | 0  | Not-determined | Genome-fragment | NA | 0     |
| SI_k141_60032                                 | 3075  | No  | NA | 0   | 4  | Not-determined | Genome-fragment | NA | 0     |
| SI_k141_241813                                | 2133  | No  | NA | 0   | 1  | Not-determined | Genome-fragment | NA | 0     |
| SI_k141_225015                                | 1336  | No  | NA | 0   | 1  | Not-determined | Genome-fragment | NA | 0     |
| SI_k141_389394                                | 1091  | No  | NA | 0   | 1  | Not-determined | Genome-fragment | NA | 0     |
| SI_k141_75950                                 | 7752  | No  | NA | 0   | 1  | Not-determined | Genome-fragment | NA | 0     |
| SI4-final-viral-combined_k141_53315  full     | 1489  | No  | NA | 0   | 0  | Low-quality    | Genome-fragment | NA | 3.03  |
| SI8-final-viral-combined_k141_198670  full    | 1489  | No  | NA | 0   | 0  | Low-quality    | Genome-fragment | NA | 3.1   |
| SI_k141_339440                                | 1987  | No  | NA | 0   | 0  | Not-determined | Genome-fragment | NA | 0     |
| SI_k141_274045                                | 5612  | No  | NA | 0   | 1  | Not-determined | Genome-fragment | NA | 0     |
|                                               |       |     |    |     |    |                |                 |    |       |



|                                             |      |     |     |    |   |                |                 |      |       |
|---------------------------------------------|------|-----|-----|----|---|----------------|-----------------|------|-------|
| S1-final-viral-combined_k141_126361  H2gene | 1491 | No  | NA  | 1  | 0 | Low-quality    | Genome-fragment | 5.05 | 0     |
| S1_k141_109053                              | 3785 | No  | NA  | 0  | 1 | Not-determined | Genome-fragment | NA   | 0     |
| S1_k141_93802                               | 2098 | No  | NA  | 0  | 2 | Not-determined | Genome-fragment | NA   | 0     |
| S1_k141_357447                              | 1250 | No  | NA  | 0  | 0 | Not-determined | Genome-fragment | NA   | 0     |
| S1_k141_76213                               | 1515 | No  | NA  | 0  | 1 | Not-determined | Genome-fragment | NA   | 0     |
| S1_k141_209643                              | 1680 | No  | NA  | 0  | 1 | Not-determined | Genome-fragment | NA   | 0     |
| S1_k141_225303                              | 2504 | No  | NA  | 0  | 0 | Not-determined | Genome-fragment | NA   | 0     |
| S1_k141_158711                              | 1310 | No  | NA  | 0  | 1 | Not-determined | Genome-fragment | NA   | 0     |
| S1_k141_76214                               | 1318 | No  | NA  | 0  | 0 | Not-determined | Genome-fragment | NA   | 0     |
| S1_k141_259199                              | 1309 | No  | NA  | 0  | 1 | Not-determined | Genome-fragment | NA   | 0     |
| S1_k141_60337                               | 1915 | No  | NA  | 0  | 4 | Not-determined | Genome-fragment | NA   | 0     |
| S1_k141_259204                              | 6960 | No  | NA  | 0  | 1 | Not-determined | Genome-fragment | NA   | 0     |
| S7-final-viral-combined_k141_102777  full   | 1491 | Yes | 666 | 1  | 1 | Low-quality    | Genome-fragment | 1.75 | 55.33 |
| S1_k141_274333                              | 1299 | No  | NA  | 0  | 1 | Not-determined | Genome-fragment | NA   | 0     |
| S1_k141_339597                              | 4674 | No  | NA  | 0  | 3 | Not-determined | Genome-fragment | NA   | 0     |
| S7-final-viral-combined_k141_176302  full   | 1491 | No  | NA  | 0  | 1 | Low-quality    | Genome-fragment | 2.06 | 0     |
| S1_k141_339606                              | 6414 | No  | NA  | 0  | 4 | Not-determined | Genome-fragment | NA   | 0     |
| S1_k141_76266                               | 1245 | No  | NA  | 0  | 1 | Not-determined | Genome-fragment | NA   | 0     |
| S1_k141_192029                              | 1522 | No  | NA  | 0  | 0 | Not-determined | Genome-fragment | NA   | 0     |
| S1_k141_109140                              | 1224 | No  | NA  | 0  | 0 | Not-determined | Genome-fragment | NA   | 0     |
| S1_k141_109149                              | 1443 | No  | NA  | 0  | 1 | Not-determined | Genome-fragment | NA   | 0     |
| S17-final-viral-combined_k141_231082  full  | 1491 | No  | NA  | 2  | 0 | Low-quality    | Genome-fragment | 3.49 | 0     |
| S1_k141_93935                               | 1010 | No  | NA  | 0  | 1 | Not-determined | Genome-fragment | NA   | 0     |
| S1_k141_11367                               | 1197 | No  | NA  | 0  | 1 | Not-determined | Genome-fragment | NA   | 0     |
| S2-final-viral-combined_k141_190946  full   | 1491 | No  | NA  | 0  | 0 | Low-quality    | Genome-fragment | 1.01 | 0     |
| S1_k141_291415                              | 1201 | No  | NA  | 0  | 1 | Not-determined | Genome-fragment | NA   | 0     |
| S1_k141_274374                              | 1045 | No  | NA  | 0  | 1 | Not-determined | Genome-fragment | NA   | 0     |
| S8_k141_53529                               | 1491 | No  | NA  | 1  | 0 | Low-quality    | Genome-fragment | 0.97 | 0     |
| S1_k141_174969                              | 5579 | No  | NA  | 0  | 4 | Not-determined | Genome-fragment | NA   | 0     |
| S11-final-viral-combined_k141_23872  full   | 1492 | No  | NA  | 0  | 3 | Low-quality    | Genome-fragment | 0.88 | 0     |
| S1_k141_308340                              | 1015 | No  | NA  | 0  | 1 | Not-determined | Genome-fragment | NA   | 0     |
| S11_k141_210203                             | 1492 | No  | NA  | 0  | 0 | Low-quality    | Genome-fragment | 3.49 | 0     |
| S1_k141_175006                              | 1165 | No  | NA  | 0  | 0 | Not-determined | Genome-fragment | NA   | 0     |
| S1_k141_308384                              | 2552 | No  | NA  | 0  | 3 | Not-determined | Genome-fragment | NA   | 0     |
| S1-final-viral-combined_k141_114663  full   | 1492 | No  | NA  | 1  | 0 | Low-quality    | Genome-fragment | 2.21 | 0     |
| S1_k141_391195                              | 2063 | No  | NA  | 0  | 0 | Not-determined | Genome-fragment | NA   | 0     |
| S3-final-viral-combined_k141_135079  full   | 1492 | No  | NA  | 1  | 0 | Low-quality    | Genome-fragment | 3.13 | 0     |
| S1_k141_259302                              | 1617 | No  | NA  | 0  | 0 | Not-determined | Genome-fragment | NA   | 0     |
| S1_k141_291139                              | 2210 | No  | NA  | 0  | 3 | Not-determined | Genome-fragment | NA   | 0     |
| S1_k141_143226                              | 1125 | No  | NA  | 0  | 0 | Not-determined | Genome-fragment | NA   | 0     |
| S1_k141_325228                              | 1177 | No  | NA  | 0  | 1 | Not-determined | Genome-fragment | NA   | 0     |
| S1_k141_158951                              | 4704 | No  | NA  | 0  | 3 | Not-determined | Genome-fragment | NA   | 0     |
| S1_k141_109303                              | 1555 | No  | NA  | 0  | 1 | Not-determined | Genome-fragment | NA   | 0     |
| S1_k141_143258                              | 1034 | No  | NA  | 0  | 0 | Not-determined | Genome-fragment | NA   | 0     |
| S1_k141_158977                              | 1846 | No  | NA  | 0  | 2 | Not-determined | Genome-fragment | NA   | 0     |
| S1_k141_163796                              | 1492 | No  | NA  | 0  | 1 | Low-quality    | Genome-fragment | 3.47 | 0     |
| S1_k141_76412                               | 2109 | No  | NA  | 0  | 0 | Not-determined | Genome-fragment | NA   | 0     |
| S1_k141_109335                              | 1050 | No  | NA  | 0  | 0 | Not-determined | Genome-fragment | NA   | 0     |
| S1_k141_143132                              | 1103 | No  | NA  | 0  | 0 | Not-determined | Genome-fragment | NA   | 0     |
| S12-final-viral-combined_k141_95642  full   | 1492 | No  | NA  | 0  | 2 | Low-quality    | Genome-fragment | 2.58 | 0     |
| S1_k141_159003                              | 1183 | No  | NA  | 0  | 0 | Not-determined | Genome-fragment | NA   | 0     |
| S1_k141_159006                              | 1241 | No  | NA  | 0  | 0 | Not-determined | Genome-fragment | NA   | 0     |
| S1_k141_274533                              | 4039 | No  | NA  | 0  | 0 | Not-determined | Genome-fragment | NA   | 0     |
| S1_k141_27659                               | 1175 | No  | NA  | 0  | 0 | Not-determined | Genome-fragment | NA   | 0     |
| S1_k141_127712                              | 1722 | No  | NA  | 0  | 0 | Not-determined | Genome-fragment | NA   | 0     |
| S12_k141_299981                             | 1492 | No  | NA  | 0  | 1 | Low-quality    | Genome-fragment | 2.21 | 0     |
| S8_k141_59304                               | 1492 | No  | NA  | 0  | 0 | Low-quality    | Genome-fragment | 1.12 | 0     |
| S1_k141_205913                              | 1493 | No  | NA  | 0  | 1 | Not-determined | Genome-fragment | NA   | 0     |
| S1_k141_373509                              | 2312 | No  | NA  | 0  | 1 | Not-determined | Genome-fragment | NA   | 0     |
| S1_k141_339808                              | 6975 | No  | NA  | 0  | 1 | Not-determined | Genome-fragment | NA   | 0     |
| S1_k141_159033                              | 1078 | No  | NA  | 0  | 1 | Not-determined | Genome-fragment | NA   | 0     |
| S8_k141_144085                              | 1492 | No  | NA  | 0  | 1 | Low-quality    | Genome-fragment | 2.05 | 0     |
| S1_k141_175176                              | 1428 | No  | NA  | 0  | 1 | Not-determined | Genome-fragment | NA   | 0     |
| S1_k141_109376                              | 1514 | No  | NA  | 0  | 0 | Not-determined | Genome-fragment | NA   | 0     |
| S1_k141_389841                              | 1145 | No  | NA  | 0  | 1 | Not-determined | Genome-fragment | NA   | 0     |
| S9-final-viral-combined_k141_48117  full    | 1493 | No  | NA  | 1  | 0 | Low-quality    | Genome-fragment | 3.61 | 0     |
| S9_k141_122205                              | 1493 | No  | NA  | 2  | 0 | Low-quality    | Genome-fragment | 3.57 | 0     |
| S1_k141_397842                              | 1587 | No  | NA  | 0  | 1 | Not-determined | Genome-fragment | NA   | 0     |
| S1_k141_357950                              | 5169 | No  | NA  | 0  | 1 | Not-determined | Genome-fragment | NA   | 0     |
| S1_k141_159102                              | 1186 | No  | NA  | 0  | 2 | Not-determined | Genome-fragment | NA   | 0     |
| S7-final-viral-combined_k141_88925  full    | 1493 | No  | NA  | 0  | 1 | Low-quality    | Genome-fragment | 0.76 | 0     |
| S1_k141_11575                               | 1669 | No  | NA  | 0  | 0 | Not-determined | Genome-fragment | NA   | 0     |
| S12-final-viral-combined_k141_36040  full   | 1493 | No  | NA  | 1  | 0 | Low-quality    | Genome-fragment | 2.26 | 0     |
| S1_k141_11592                               | 1006 | No  | NA  | 0  | 1 | Not-determined | Genome-fragment | NA   | 0     |
| S1_k141_308603                              | 2217 | No  | NA  | 0  | 2 | Not-determined | Genome-fragment | NA   | 0     |
| S1_k141_291815                              | 1177 | No  | NA  | 0  | 2 | Not-determined | Genome-fragment | NA   | 0     |
| S12-final-viral-combined_k141_384563  full  | 1493 | No  | NA  | 0  | 1 | Low-quality    | Genome-fragment | 3.69 | 0     |
| S1_k141_94286                               | 1208 | No  | NA  | 0  | 1 | Not-determined | Genome-fragment | NA   | 0     |
| S1_k141_291847                              | 1608 | No  | NA  | 0  | 1 | Not-determined | Genome-fragment | NA   | 0     |
| S1_k141_143448                              | 1140 | No  | NA  | 0  | 1 | Not-determined | Genome-fragment | NA   | 0     |
| S1_k141_325457                              | 1126 | No  | NA  | 0  | 0 | Not-determined | Genome-fragment | NA   | 0     |
| S1_k141_109464                              | 1066 | No  | NA  | 0  | 1 | Not-determined | Genome-fragment | NA   | 0     |
| S1_k141_76561                               | 1133 | No  | NA  | 0  | 0 | Not-determined | Genome-fragment | NA   | 0     |
| S1_k141_389988                              | 1268 | No  | NA  | 0  | 2 | Not-determined | Genome-fragment | NA   | 0     |
| S1_k141_225750                              | 6459 | No  | NA  | 0  | 4 | Not-determined | Genome-fragment | NA   | 0     |
| S1_k141_109499                              | 1106 | No  | NA  | 0  | 1 | Not-determined | Genome-fragment | NA   | 0     |
| S1_k141_193504                              | 1058 | No  | NA  | 0  | 1 | Not-determined | Genome-fragment | NA   | 0     |
| S1_k141_225766                              | 1556 | No  | NA  | 0  | 1 | Not-determined | Genome-fragment | NA   | 0     |
| S2-final-viral-combined_k141_165526  full   | 1493 | No  | NA  | 1  | 0 | Low-quality    | Genome-fragment | 1    | 0     |
| S1_k141_210083                              | 1334 | No  | NA  | 0  | 2 | Not-determined | Genome-fragment | NA   | 0     |
| S1_k141_357397                              | 1389 | No  | NA  | 0  | 1 | Not-determined | Genome-fragment | NA   | 0     |
| S11-final-viral-combined_k141_86223  full   | 1494 | No  | NA  | 0  | 0 | Low-quality    | Genome-fragment | 1.78 | 0     |
| S1-final-viral-combined_k141_130710  full   | 1494 | No  | NA  | 0  | 0 | Low-quality    | Genome-fragment | 3.52 | 0     |
| S1_k141_291907                              | 1215 | No  | NA  | 0  | 0 | Not-determined | Genome-fragment | NA   | 0     |
| S1_k141_308662                              | 1031 | No  | NA  | 0  | 1 | Not-determined | Genome-fragment | NA   | 0     |
| S5-final-viral-combined_k141_155455  full   | 1494 | No  | NA  | 1  | 0 | Low-quality    | Genome-fragment | 3.73 | 0     |
| S1_k141_242477                              | 1298 | No  | NA  | 0  | 1 | Not-determined | Genome-fragment | NA   | 0     |
| S1_k141_339905                              | 1316 | No  | NA  | 0  | 1 | Not-determined | Genome-fragment | NA   | 0     |
| S1_k141_371738                              | 1043 | No  | NA  | 0  | 1 | Not-determined | Genome-fragment | NA   | 0     |
| S1_k141_193604                              | 3500 | No  | NA  | 0  | 2 | Not-determined | Genome-fragment | NA   | 0     |
| S1_k141_380848                              | 2215 | No  | NA  | 0  | 2 | Not-determined | Genome-fragment | NA   | 0     |
| S1_k141_358056                              | 3819 | No  | NA  | 0  | 3 | Not-determined | Genome-fragment | NA   | 0     |
| S1_k141_109628                              | 3387 | No  | NA  | 0  | 2 | Not-determined | Genome-fragment | NA   | 0     |
| S1_k141_60916                               | 1612 | No  | NA  | 0  | 1 | Not-determined | Genome-fragment | NA   | 0     |
| S5-final-viral-combined_k141_132286  full   | 1494 | No  | NA  | 1  | 0 | Low-quality    | Genome-fragment | 2.77 | 0     |
| S1_k141_143576                              | 1709 | No  | NA  | 0  | 2 | Not-determined | Genome-fragment | NA   | 0     |
| S1_k141_292020                              | 1399 | No  | NA  | 0  | 0 | Not-determined | Genome-fragment | NA   | 0     |
| S1_k141_159243                              | 1790 | No  | NA  | 0  | 0 | Not-determined | Genome-fragment | NA   | 0     |
| S1_k141_118120                              | 1586 | No  | NA  | 0  | 1 | Not-determined | Genome-fragment | NA   | 0     |
| S1_k141_390116                              | 1125 | No  | NA  | 0  | 1 | Not-determined | Genome-fragment | NA   | 0     |
| S1_k141_358139                              | 4234 | No  | NA  | 0  | 1 | Not-determined | Genome-fragment | NA   | 0     |
| S2-final-viral-combined_k141_175812  H2gene | 1494 | No  | NA  | 1  | 0 | Low-quality    | Genome-fragment | 1.03 | 0     |
| S1_k141_210214                              | 2023 | No  | NA  | 0  | 1 | Not-determined | Genome-fragment | NA   | 0     |
| S1_k141_143660                              | 4048 | No  | NA  | 0  | 3 | Not-determined | Genome-fragment | NA   | 0     |
| S1_k141_373808                              | 1022 | No  | NA  | 0  | 0 | Not-determined | Genome-fragment | NA   | 0     |
| S7-final-viral-combined_k141_175685  full   | 1494 | No  | NA  | 0  | 0 | Low-quality    | Genome-fragment | 2.27 | 0     |
| S1_k141_109720                              | 3350 | No  | NA  | 0  | 2 | Not-determined | Genome-fragment | NA   | 0     |
| S7_k141_240983                              | 1494 | No  | NA  | 0  | 0 | Low-quality    | Genome-fragment | 2.5  | 0     |
| S1_k141_61070                               | 1752 | No  | NA  | 0  | 2 | Not-determined | Genome-fragment | NA   | 0     |
| S1_k141_44536                               | 1150 | No  | NA  | 0  | 1 | Not-determined | Genome-fragment | NA   | 0     |
| S1_k141_159358                              | 1871 | No  | NA  | 0  | 0 | Not-determined | Genome-fragment | NA   | 0     |
| S1_k141_274886                              | 3203 | No  | NA  | 0  | 3 | Not-determined | Genome-fragment | NA   | 0     |
| S1_k141_242627                              | 1405 | No  | NA  | 0  | 1 | Not-determined | Genome-fragment | NA   | 0     |
| S1_k141_358305                              | 1254 | No  | NA  | 0  | 1 | Not-determined | Genome-fragment | NA   | 0     |
| S1_k141_259295                              | 4767 | No  | NA  | 14 | 1 | High-quality   | Genome-fragment | 100  | 0     |
| S1_k141_274929                              | 3591 | No  | NA  | 0  | 1 | Not-determined | Genome-fragment | NA   | 0     |
| S1_k141_373919                              | 3488 | No  | NA  | 0  | 2 | Not-determined | Genome-fragment | NA   | 0     |
| S1_k141_11564                               | 2780 | No  | NA  | 0  | 0 | Not-determined | Genome-fragment | NA   | 0     |
| S1_k141_76856                               | 1075 | No  | NA  | 0  | 0 | Not-determined | Genome-fragment | NA   | 0     |
| S1_k141_390214                              | 1155 | No  | NA  | 0  | 2 | Not-determined | Genome-fragment | NA   | 0     |
| S1_k141_11979                               | 3124 | No  | NA  | 0  | 1 | Not-determined | Genome-fragment | NA   | 0     |
| S1_k141_226027                              | 1547 | No  | NA  | 0  | 0 | Not-determined | Genome-fragment | NA   | 0     |
| S1_k141_226043                              | 1693 | No  | NA  | 0  | 1 | Not-determined | Genome-fragment | NA   | 0     |
| S1_k141_340164                              | 1099 | No  | NA  | 0  | 0 | Not-determined | Genome-fragment | NA   | 0     |
| S1_k141_292231                              | 1264 | No  | NA  | 0  | 1 | Not-determined | Genome-fragment | NA   | 0     |
| S1_k141_76896                               | 1128 | No  | NA  | 0  | 1 | Not-determined | Genome-fragment | NA   | 0     |
| S1_k141_226055                              | 1073 | No  | NA  | 0  | 0 | Not-determined | Genome-fragment | NA   | 0     |
| S1_k141_242656                              | 1016 | No  | NA  | 0  | 1 | Not-determined | Genome-fragment | NA   | 0     |
| S1_k141_374008                              | 1055 | No  | NA  | 0  | 1 | Not-determined | Genome-fragment | NA   | 0     |
| S1_k141_340185                              | 1148 | No  | NA  | 0  | 0 | Not-determined | Genome-fragment | NA   | 0     |
| S1_k141_24664                               | 1754 | No  | NA  | 0  | 1 | Not-determined | Genome-fragment | NA   | 0     |
| S1_k141_143848                              | 1414 | No  | NA  | 0  | 0 | Not-determined | Genome-fragment | NA   | 0     |
| S1_k141_128123                              | 1091 | No  | NA  | 0  | 0 | Not-determined | Genome-fragment | NA   | 0     |
| S1_k141_358418                              | 4069 | No  | NA  | 0  | 3 | Not-determined | Genome-fragment | NA   | 0     |
| S1_k141_143858                              | 1215 | No  | NA  | 0  | 0 | Not-determined | Genome-fragment | NA   | 0     |
| S1_k141_61287                               | 1178 | No  | NA  | 0  | 1 | Not-determined | Genome-fragment | NA   | 0     |
| S1_k141_175556                              | 1425 | No  |     |    |   |                |                 |      |       |



|                                            |      |    |    |   |    |                |                 |    |       |
|--------------------------------------------|------|----|----|---|----|----------------|-----------------|----|-------|
| SL_k141_309236                             | 2370 | No | NA | 0 | 1  | Not-determined | Genome-fragment | NA | 0     |
| SL_k141_175711                             | 1096 | No | NA | 0 | 1  | Not-determined | Genome-fragment | NA | 0     |
| SL_k141_309255                             | 1103 | No | NA | 0 | 0  | Not-determined | Genome-fragment | NA | 0     |
| SL_k141_193848                             | 1106 | No | NA | 0 | 1  | Not-determined | Genome-fragment | NA | 0     |
| SL_k141_374250                             | 1360 | No | NA | 0 | 1  | Not-determined | Genome-fragment | NA | 0     |
| S1-final-viral-combined_k141_205299  full  | 1495 | No | NA | 1 | 0  | Low-quality    | Genome-fragment | NA | 3.52  |
| SL_k141_358729                             | 1022 | No | NA | 0 | 1  | Not-determined | Genome-fragment | NA | 0     |
| SL_k141_128334                             | 5542 | No | NA | 0 | 0  | Not-determined | Genome-fragment | NA | 0     |
| SL_k141_390607                             | 1062 | No | NA | 0 | 1  | Not-determined | Genome-fragment | NA | 0     |
| SL_k141_374302                             | 1075 | No | NA | 0 | 0  | Not-determined | Genome-fragment | NA | 0     |
| SL_k141_374305                             | 1053 | No | NA | 0 | 1  | Not-determined | Genome-fragment | NA | 0     |
| SL_k141_236053                             | 1717 | No | NA | 0 | 1  | Not-determined | Genome-fragment | NA | 0     |
| SL_k141_275256                             | 1181 | No | NA | 0 | 0  | Not-determined | Genome-fragment | NA | 0     |
| SL_k141_260361                             | 1822 | No | NA | 0 | 0  | Not-determined | Genome-fragment | NA | 0     |
| SL_k141_105955                             | 1045 | No | NA | 0 | 0  | Not-determined | Genome-fragment | NA | 0     |
| SL_k141_291629                             | 1277 | No | NA | 0 | 0  | Not-determined | Genome-fragment | NA | 0     |
| S1-final-viral-combined_k141_242553  full  | 1495 | No | NA | 0 | 0  | Low-quality    | Genome-fragment | NA | 3.34  |
| SL_k141_275306                             | 1914 | No | NA | 0 | 0  | Not-determined | Genome-fragment | NA | 0     |
| SL_k141_138402                             | 2058 | No | NA | 0 | 1  | Not-determined | Genome-fragment | NA | 0     |
| SL_k141_102204                             | 1495 | No | NA | 0 | 0  | Low-quality    | Genome-fragment | NA | 3.64  |
| SL_k141_292688                             | 1043 | No | NA | 0 | 0  | Not-determined | Genome-fragment | NA | 0     |
| SL_k141_109087                             | 4025 | No | NA | 0 | 0  | Not-determined | Genome-fragment | NA | 0     |
| SL_k141_12510                              | 1665 | No | NA | 0 | 1  | Not-determined | Genome-fragment | NA | 0     |
| SL_k141_292693                             | 1181 | No | NA | 0 | 1  | Not-determined | Genome-fragment | NA | 0     |
| SL_k141_159720                             | 1073 | No | NA | 0 | 0  | Not-determined | Genome-fragment | NA | 0     |
| SL_k141_236516                             | 1112 | No | NA | 0 | 0  | Not-determined | Genome-fragment | NA | 0     |
| S5-final-viral-combined_k141_141440  full  | 1495 | No | NA | 0 | 1  | Low-quality    | Genome-fragment | NA | 0.6   |
| SL_k141_309349                             | 2714 | No | NA | 0 | 3  | Not-determined | Genome-fragment | NA | 0     |
| SL_k141_28651                              | 1099 | No | NA | 0 | 0  | Not-determined | Genome-fragment | NA | 0     |
| SL_k141_390771                             | 3930 | No | NA | 0 | 2  | Not-determined | Genome-fragment | NA | 0     |
| SL_k141_275338                             | 1760 | No | NA | 0 | 2  | Not-determined | Genome-fragment | NA | 0     |
| SL_k141_194079                             | 1699 | No | NA | 0 | 1  | Not-determined | Genome-fragment | NA | 0     |
| SL_k141_309387                             | 1094 | No | NA | 0 | 0  | Not-determined | Genome-fragment | NA | 0     |
| S7-final-viral-combined_k141_229060  full  | 1495 | No | NA | 0 | 2  | Low-quality    | Genome-fragment | NA | 0.69  |
| S7-final-viral-combined_k141_8849  full    | 1495 | No | NA | 1 | 0  | Low-quality    | Genome-fragment | NA | 2.52  |
| S7_k141_200606                             | 1495 | No | NA | 0 | 0  | Low-quality    | Genome-fragment | NA | 2.46  |
| SL_k141_243165                             | 1095 | No | NA | 0 | 1  | Not-determined | Genome-fragment | NA | 0     |
| SL_k141_12618                              | 1095 | No | NA | 0 | 0  | Not-determined | Genome-fragment | NA | 0     |
| SL_k141_358941                             | 1218 | No | NA | 0 | 1  | Not-determined | Genome-fragment | NA | 0     |
| SL_k141_374529                             | 5331 | No | NA | 0 | 0  | Not-determined | Genome-fragment | NA | 0     |
| SL_k141_292821                             | 3612 | No | NA | 0 | 1  | Not-determined | Genome-fragment | NA | 0     |
| SL_k141_275457                             | 1833 | No | NA | 0 | 0  | Not-determined | Genome-fragment | NA | 0     |
| SL_k141_61850                              | 1529 | No | NA | 0 | 2  | Not-determined | Genome-fragment | NA | 0     |
| SL_k141_260486                             | 2048 | No | NA | 0 | 1  | Not-determined | Genome-fragment | NA | 0     |
| SL_k141_309489                             | 1553 | No | NA | 0 | 29 | Not-determined | Genome-fragment | NA | 0     |
| S17-final-viral-combined_k141_212373  full | 1495 | No | NA | 1 | 0  | Low-quality    | Genome-fragment | NA | 2.81  |
| SL_k141_260562                             | 1821 | No | NA | 0 | 0  | Not-determined | Genome-fragment | NA | 0     |
| S17-final-viral-combined_k141_42262  full  | 1495 | No | NA | 0 | 0  | Low-quality    | Genome-fragment | NA | 3.6   |
| SL_k141_275573                             | 3151 | No | NA | 0 | 1  | Not-determined | Genome-fragment | NA | 0     |
| SL_k141_374634                             | 4127 | No | NA | 0 | 3  | Not-determined | Genome-fragment | NA | 0     |
| SL_k141_374645                             | 1118 | No | NA | 0 | 0  | Not-determined | Genome-fragment | NA | 0     |
| SL_k141_236733                             | 1245 | No | NA | 0 | 1  | Not-determined | Genome-fragment | NA | 0     |
| SL_k141_390889                             | 3201 | No | NA | 0 | 1  | Not-determined | Genome-fragment | NA | 0     |
| SL_k141_45228                              | 3358 | No | NA | 0 | 1  | Not-determined | Genome-fragment | NA | 0     |
| SL_k141_242304                             | 3768 | No | NA | 0 | 0  | Not-determined | Genome-fragment | NA | 0     |
| SL_k141_210922                             | 2912 | No | NA | 0 | 0  | Not-determined | Genome-fragment | NA | 0     |
| SL_k141_260609                             | 1515 | No | NA | 0 | 1  | Not-determined | Genome-fragment | NA | 0     |
| SL_k141_390926                             | 1012 | No | NA | 0 | 0  | Not-determined | Genome-fragment | NA | 0     |
| SL_k141_62006                              | 1017 | No | NA | 0 | 1  | Not-determined | Genome-fragment | NA | 0     |
| SL_k141_326413                             | 2039 | No | NA | 0 | 2  | Not-determined | Genome-fragment | NA | 0     |
| SL_k141_359149                             | 1786 | No | NA | 0 | 1  | Not-determined | Genome-fragment | NA | 0     |
| SL_k141_28838                              | 4081 | No | NA | 0 | 3  | Not-determined | Genome-fragment | NA | 0     |
| SL_k141_77616                              | 3172 | No | NA | 0 | 1  | Not-determined | Genome-fragment | NA | 0     |
| SL_k141_326431                             | 2272 | No | NA | 0 | 1  | Not-determined | Genome-fragment | NA | 0     |
| SL_k141_175978                             | 1363 | No | NA | 0 | 2  | Not-determined | Genome-fragment | NA | 0     |
| SL_k141_293004                             | 1210 | No | NA | 0 | 0  | Not-determined | Genome-fragment | NA | 0     |
| S12-final-viral-combined_k141_112142  full | 1495 | No | NA | 1 | 0  | Low-quality    | Genome-fragment | NA | 3.83  |
| SL_k141_293017                             | 1059 | No | NA | 0 | 1  | Not-determined | Genome-fragment | NA | 0     |
| SL_k141_110068                             | 1217 | No | NA | 0 | 1  | Not-determined | Genome-fragment | NA | 0     |
| SL_k141_391039                             | 1165 | No | NA | 0 | 1  | Not-determined | Genome-fragment | NA | 0     |
| S12-final-viral-combined_k141_199378  full | 1495 | No | NA | 1 | 0  | Low-quality    | Genome-fragment | NA | 1.03  |
| SL_k141_309655                             | 1363 | No | NA | 0 | 1  | Not-determined | Genome-fragment | NA | 0     |
| S4-final-viral-combined_k141_117761  full  | 1495 | No | NA | 1 | 0  | Low-quality    | Genome-fragment | NA | 3.06  |
| SL_k141_62127                              | 2399 | No | NA | 0 | 2  | Not-determined | Genome-fragment | NA | 0     |
| SL_k141_293083                             | 1890 | No | NA | 0 | 0  | Not-determined | Genome-fragment | NA | 0     |
| S8-final-viral-combined_k141_51325  full   | 1495 | No | NA | 0 | 0  | Low-quality    | Genome-fragment | NA | 2.89  |
| S9-final-viral-combined_k141_16218  full   | 1496 | No | NA | 0 | 0  | Low-quality    | Genome-fragment | NA | 3.28  |
| SL_k141_28888                              | 4476 | No | NA | 0 | 1  | Not-determined | Genome-fragment | NA | 0     |
| SL_k141_138911                             | 2014 | No | NA | 0 | 0  | Not-determined | Genome-fragment | NA | 0     |
| SL_k141_211091                             | 4322 | No | NA | 0 | 2  | Not-determined | Genome-fragment | NA | 0     |
| SL_k141_62183                              | 2386 | No | NA | 0 | 0  | Not-determined | Genome-fragment | NA | 0     |
| SL_k141_160035                             | 1102 | No | NA | 0 | 1  | Not-determined | Genome-fragment | NA | 0     |
| S9_k141_54897                              | 1496 | No | NA | 0 | 1  | Low-quality    | Genome-fragment | NA | 0.36  |
| SL_k141_95196                              | 1089 | No | NA | 0 | 1  | Not-determined | Genome-fragment | NA | 0     |
| S11-final-viral-combined_k141_132896  full | 1496 | No | NA | 1 | 0  | Low-quality    | Genome-fragment | NA | 2.59  |
| SL_k141_326581                             | 1470 | No | NA | 0 | 0  | Not-determined | Genome-fragment | NA | 0     |
| SL_k141_309751                             | 1370 | No | NA | 0 | 0  | Not-determined | Genome-fragment | NA | 0     |
| SL_k141_243544                             | 1495 | No | NA | 0 | 0  | Not-determined | Genome-fragment | NA | 0     |
| SL_k141_260827                             | 6744 | No | NA | 0 | 0  | Not-determined | Genome-fragment | NA | 0     |
| SL_k141_326612                             | 1445 | No | NA | 0 | 1  | Not-determined | Genome-fragment | NA | 0     |
| SL_k141_226951                             | 1016 | No | NA | 0 | 0  | Not-determined | Genome-fragment | NA | 0     |
| SL_k141_236972                             | 1360 | No | NA | 0 | 0  | Not-determined | Genome-fragment | NA | 0     |
| SL_k141_128959                             | 1014 | No | NA | 0 | 0  | Not-determined | Genome-fragment | NA | 0     |
| SL_k141_243593                             | 3727 | No | NA | 0 | 2  | Not-determined | Genome-fragment | NA | 0     |
| SL_k141_260869                             | 1525 | No | NA | 0 | 1  | Not-determined | Genome-fragment | NA | 0     |
| SL_k141_340983                             | 3949 | No | NA | 0 | 2  | Not-determined | Genome-fragment | NA | 0     |
| SL_k141_45377                              | 3897 | No | NA | 0 | 2  | Not-determined | Genome-fragment | NA | 0     |
| SL_k141_176069                             | 1528 | No | NA | 0 | 1  | Not-determined | Genome-fragment | NA | 0     |
| SL_k141_95310                              | 1184 | No | NA | 0 | 1  | Not-determined | Genome-fragment | NA | 0     |
| SL_k141_326640                             | 1045 | No | NA | 0 | 1  | Not-determined | Genome-fragment | NA | 0     |
| SL_k141_326641                             | 2582 | No | NA | 0 | 2  | Not-determined | Genome-fragment | NA | 0     |
| SL_k141_326642                             | 1006 | No | NA | 0 | 1  | Not-determined | Genome-fragment | NA | 0     |
| S7-final-viral-combined_k141_153928  full  | 1496 | No | NA | 0 | 0  | Low-quality    | Genome-fragment | NA | 3.64  |
| SL_k141_341030                             | 1113 | No | NA | 0 | 1  | Not-determined | Genome-fragment | NA | 0     |
| SL_k141_275854                             | 2130 | No | NA | 0 | 2  | Not-determined | Genome-fragment | NA | 0     |
| SL_k141_341036                             | 3201 | No | NA | 0 | 4  | Not-determined | Genome-fragment | NA | 0     |
| SL_k141_129074                             | 1478 | No | NA | 0 | 2  | Not-determined | Genome-fragment | NA | 0     |
| SL_k141_12948                              | 1213 | No | NA | 0 | 1  | Not-determined | Genome-fragment | NA | 0     |
| SL_k141_341047                             | 1390 | No | NA | 0 | 0  | Not-determined | Genome-fragment | NA | 0     |
| SL_k141_160195                             | 1298 | No | NA | 0 | 2  | Not-determined | Genome-fragment | NA | 0     |
| SL_k141_374939                             | 2552 | No | NA | 0 | 2  | Not-determined | Genome-fragment | NA | 0     |
| SL_k141_194742                             | 2163 | No | NA | 0 | 1  | Not-determined | Genome-fragment | NA | 0     |
| SL_k141_110334                             | 1424 | No | NA | 0 | 1  | Not-determined | Genome-fragment | NA | 0     |
| S12-final-viral-combined_k141_178542  full | 1496 | No | NA | 0 | 1  | Low-quality    | Genome-fragment | NA | 0.66  |
| SL_k141_129129                             | 1026 | No | NA | 0 | 2  | Not-determined | Genome-fragment | NA | 0     |
| SL_k141_62367                              | 3491 | No | NA | 0 | 3  | Not-determined | Genome-fragment | NA | 0     |
| SL_k141_211331                             | 3503 | No | NA | 0 | 1  | Not-determined | Genome-fragment | NA | 0     |
| SL_k141_291178                             | 1084 | No | NA | 0 | 1  | Not-determined | Genome-fragment | NA | 0     |
| SL_k141_160756                             | 5257 | No | NA | 0 | 2  | Not-determined | Genome-fragment | NA | 0     |
| S12-final-viral-combined_k141_367003  full | 1496 | No | NA | 0 | 0  | Low-quality    | Genome-fragment | NA | 14.48 |
| SL_k141_326769                             | 1111 | No | NA | 0 | 0  | Not-determined | Genome-fragment | NA | 0     |
| S2-final-viral-combined_k141_106430  full  | 1496 | No | NA | 0 | 0  | Low-quality    | Genome-fragment | NA | 0.94  |
| SL_k141_261083                             | 1243 | No | NA | 0 | 0  | Not-determined | Genome-fragment | NA | 0     |
| SL_k141_391222                             | 1431 | No | NA | 0 | 0  | Not-determined | Genome-fragment | NA | 0     |
| SL_k141_243805                             | 1102 | No | NA | 0 | 0  | Not-determined | Genome-fragment | NA | 0     |
| S2-final-viral-combined_k141_130373  full  | 1496 | No | NA | 0 | 0  | Low-quality    | Genome-fragment | NA | 1.67  |
| SL_k141_359534                             | 1203 | No | NA | 0 | 2  | Not-determined | Genome-fragment | NA | 0     |
| SL_k141_118897                             | 1496 | No | NA | 0 | 0  | Low-quality    | Genome-fragment | NA | 5.13  |
| S9-final-viral-combined_k141_67190  full   | 1497 | No | NA | 2 | 0  | Low-quality    | Genome-fragment | NA | 4.36  |
| SL_k141_391284                             | 1162 | No | NA | 0 | 1  | Not-determined | Genome-fragment | NA | 0     |
| SL_k141_160400                             | 1039 | No | NA | 0 | 0  | Not-determined | Genome-fragment | NA | 0     |
| S1-final-viral-combined_k141_164947  full  | 1497 | No | NA | 1 | 0  | Low-quality    | Genome-fragment | NA | 3.73  |
| SL_k141_160417                             | 2391 | No | NA | 0 | 0  | Not-determined | Genome-fragment | NA | 0     |
| SL_k141_29170                              | 1027 | No | NA | 0 | 1  | Not-determined | Genome-fragment | NA | 0     |
| S1-final-viral-combined_k141_225225  full  | 1497 | No | NA | 0 | 0  | Low-quality    | Genome-fragment | NA | 3.92  |
| SL_k141_29173                              | 1820 | No | NA | 0 | 0  | Not-determined | Genome-fragment | NA | 0     |
| SL_k141_341226                             | 1120 | No | NA | 0 | 1  | Not-determined | Genome-fragment | NA | 0     |
| SL_k141_375151                             | 5140 | No | NA | 0 | 2  | Not-determined | Genome-fragment | NA | 0     |
| SL_k141_129364                             | 1746 | No | NA | 0 | 1  | Not-determined | Genome-fragment | NA | 0     |
| SL_k141_326930                             | 1795 | No | NA | 0 | 1  | Not-determined | Genome-fragment | NA | 0     |
| S5-final-viral-combined_k141_41153  full   | 1497 | No | NA | 0 | 0  | Low-quality    | Genome-fragment | NA | 2.82  |
| SL_k141_176397                             | 4093 | No | NA | 0 | 2  | Not-determined | Genome-fragment | NA | 0     |
| SL_k141_243978                             | 1014 | No | NA | 0 | 0  | Not-determined | Genome-fragment | NA | 0     |
| SL_k141_310117                             | 3220 | No | NA | 0 | 2  | Not-determined | Genome-fragment | NA | 0     |
| SL_k141_355542                             | 1018 | No | NA | 0 | 2  | Not-determined | Genome-fragment | NA | 0     |
| SL_k141_78008                              | 1348 | No | NA | 0 | 0  | Not-determined | Genome-fragment | NA | 0     |
| S12-final-viral-combined_k141_86122  full  |      |    |    |   |    |                |                 |    |       |



|                                              |       |    |    |    |    |                |                 |                 |       |     |
|----------------------------------------------|-------|----|----|----|----|----------------|-----------------|-----------------|-------|-----|
| SI_k141_95750                                | 1603  | No | NA | 0  | 0  | Not-determined | Genome-fragment | NA              | 0     | 0   |
| SI-final-viral-combined_k141_156401[full]    | 1498  | No | NA | 0  | 1  | Low-quality    | Genome-fragment | NA              | 0.72  | 0   |
| SI_k141_293684                               | 1160  | No | NA | 0  | 1  | Not-determined | Genome-fragment | NA              | 0     | 0   |
| SI_k141_95764                                | 1266  | No | NA | 0  | 1  | Not-determined | Genome-fragment | NA              | 0     | 0   |
| SI_k141_13398                                | 1129  | No | NA | 0  | 1  | Not-determined | Genome-fragment | NA              | 0     | 0   |
| SI_k141_145114                               | 1016  | No | NA | 0  | 1  | Not-determined | Genome-fragment | NA              | 0     | 0   |
| SI_k141_126124                               | 1498  | No | NA | 2  | 0  | Low-quality    | Genome-fragment | NA              | 2.67  | 0   |
| SI-final-viral-combined_k141_206570[full]    | 1498  | No | NA | 2  | 0  | Low-quality    | Genome-fragment | NA              | 2.26  | 0   |
| SI_k141_391556                               | 4989  | No | NA | 0  | 0  | Not-determined | Genome-fragment | NA              | 0     | 0   |
| SI_k141_327075                               | 3752  | No | NA | 0  | 3  | Not-determined | Genome-fragment | NA              | 0     | 0   |
| SI_k141_391561                               | 1173  | No | NA | 0  | 2  | Not-determined | Genome-fragment | NA              | 0     | 0   |
| SI7-final-viral-combined_k141_147556[full]   | 1498  | No | NA | 0  | 0  | Low-quality    | Genome-fragment | NA              | 3.03  | 0   |
| SI7-final-viral-combined_k141_9346[full]     | 1498  | No | NA | 1  | 0  | Low-quality    | Genome-fragment | NA              | 2.79  | 0   |
| SI_k141_244325                               | 1720  | No | NA | 0  | 0  | Not-determined | Genome-fragment | NA              | 0     | 0   |
| SI2-final-viral-combined_k141_323134[full]   | 1498  | No | NA | 0  | 1  | Low-quality    | Genome-fragment | NA              | 1.9   | 0   |
| SI_k141_293772                               | 1081  | No | NA | 0  | 0  | Not-determined | Genome-fragment | NA              | 0     | 0   |
| SI2-final-viral-combined_k141_139936[full]   | 1498  | No | NA | 0  | 2  | Low-quality    | Genome-fragment | NA              | 1.79  | 0   |
| SI_k141_391603                               | 1033  | No | NA | 0  | 0  | Not-determined | Genome-fragment | NA              | 0     | 0   |
| SI2-final-viral-combined_k141_45544[full]    | 1498  | No | NA | 0  | 0  | Low-quality    | Genome-fragment | NA              | 2.45  | 0   |
| SI_k141_78232                                | 1459  | No | NA | 0  | 1  | Not-determined | Genome-fragment | NA              | 0     | 0   |
| SI_k141_176690                               | 1838  | No | NA | 0  | 1  | Not-determined | Genome-fragment | NA              | 0     | 0   |
| SI_k141_95887                                | 1241  | No | NA | 0  | 1  | Not-determined | Genome-fragment | NA              | 0     | 0   |
| SI_k141_375450                               | 1889  | No | NA | 0  | 0  | Not-determined | Genome-fragment | NA              | 0     | 0   |
| SI_k141_95889                                | 1060  | No | NA | 0  | 0  | Not-determined | Genome-fragment | NA              | 0     | 0   |
| SI_k141_62722                                | 1218  | No | NA | 0  | 0  | Not-determined | Genome-fragment | NA              | 0     | 0   |
| SI2-final-viral-combined_k141_67332[112gene] | 1458  | No | NA | 1  | 0  | Low-quality    | Genome-fragment | NA              | 4.01  | 0   |
| SI_k141_212042                               | 1251  | No | NA | 0  | 0  | Not-determined | Genome-fragment | NA              | 0     | 0   |
| SI_k141_29288                                | 47233 | No | NA | 17 | 1  | Medium-quality | Genome-fragment | NA              | 87    | 0   |
| SI4-final-viral-combined_k141_53823[full]    | 1498  | No | NA | 2  | 0  | Low-quality    | Genome-fragment | NA              | 2.33  | 0   |
| SI8-final-viral-combined_k141_36235[full]    | 1498  | No | NA | 0  | 0  | Low-quality    | Genome-fragment | NA              | 1.74  | 0   |
| SI_k141_276545                               | 5999  | No | NA | 0  | 3  | Not-determined | Genome-fragment | NA              | 0     | 0   |
| SI9-final-viral-combined_k141_96345[full]    | 1499  | No | NA | 0  | 0  | Low-quality    | Genome-fragment | NA              | 17.03 | 0   |
| SI_k141_45965                                | 1039  | No | NA | 0  | 1  | Not-determined | Genome-fragment | NA              | 0     | 0   |
| SI_k141_227687                               | 1032  | No | NA | 0  | 0  | Not-determined | Genome-fragment | NA              | 0     | 0   |
| SI_k141_48004                                | 2690  | No | NA | 0  | 1  | Not-determined | Genome-fragment | NA              | 0     | 0   |
| SI_k141_78167                                | 3977  | No | NA | 0  | 1  | Not-determined | Genome-fragment | NA              | 0     | 0   |
| SI11-final-viral-combined_k141_99899[full]   | 1499  | No | NA | 0  | 2  | Low-quality    | Genome-fragment | NA              | 1.27  | 0   |
| SI_k141_96021                                | 1215  | No | NA | 0  | 0  | Not-determined | Genome-fragment | NA              | 0     | 0   |
| SI_k141_244547                               | 1010  | No | NA | 0  | 0  | Not-determined | Genome-fragment | NA              | 0     | 0   |
| SI_k141_145419                               | 4246  | No | NA | 0  | 2  | Not-determined | Genome-fragment | NA              | 0     | 0   |
| SI11-final-viral-combined_k141_257859[full]  | 1499  | No | NA | 0  | 0  | Low-quality    | Genome-fragment | NA              | 1.11  | 0   |
| SI_k141_195460                               | 1044  | No | NA | 0  | 0  | Not-determined | Genome-fragment | NA              | 0     | 0   |
| SI_k141_227782                               | 7723  | No | NA | 0  | 5  | Not-determined | Genome-fragment | NA              | 0     | 0   |
| SI_k141_227794                               | 3850  | No | NA | 0  | 3  | Not-determined | Genome-fragment | NA              | 0     | 0   |
| SI_k141_113762                               | 1499  | No | NA | 0  | 0  | Low-quality    | Genome-fragment | NA              | 2.47  | 0   |
| SI_k141_359974                               | 1105  | No | NA | 0  | 0  | Not-determined | Genome-fragment | NA              | 0     | 0   |
| SI7-k141_173680                              | 1499  | No | NA | 0  | 0  | Low-quality    | Genome-fragment | NA              | 2.39  | 0   |
| SI2_k141_195817                              | 1499  | No | NA | 0  | 0  | Low-quality    | Genome-fragment | NA              | 0.81  | 0   |
| SI_k141_161085                               | 1000  | No | NA | 0  | 1  | Not-determined | Genome-fragment | NA              | 0     | 0   |
| SI_k141_195503                               | 1414  | No | NA | 0  | 1  | Not-determined | Genome-fragment | NA              | 0     | 0   |
| SI_k141_310407                               | 5153  | No | NA | 0  | 1  | Not-determined | Genome-fragment | NA              | 0     | 0   |
| SI_k141_129998                               | 2585  | No | NA | 0  | 1  | Not-determined | Genome-fragment | NA              | 0     | 0   |
| SI2_k141_113847                              | 1499  | No | NA | 0  | 0  | Low-quality    | Genome-fragment | NA              | 1.06  | 0   |
| SI2-final-viral-combined_k141_90169[112gene] | 1499  | No | NA | 0  | 0  | Low-quality    | Genome-fragment | NA              | 3.87  | 0   |
| SI_k141_161120                               | 1849  | No | NA | 0  | 0  | Not-determined | Genome-fragment | NA              | 0     | 0   |
| SI_k141_261711                               | 1668  | No | NA | 0  | 0  | Not-determined | Genome-fragment | NA              | 0     | 0   |
| SI_k141_391799                               | 1328  | No | NA | 0  | 0  | Not-determined | Genome-fragment | NA              | 0     | 0   |
| SI_k141_176978                               | 1219  | No | NA | 0  | 0  | Not-determined | Genome-fragment | NA              | 0     | 0   |
| SI_k141_13797                                | 2373  | No | NA | 0  | 1  | Not-determined | Genome-fragment | NA              | 0     | 0   |
| SI4_k141_2702                                | 1499  | No | NA | 0  | 1  | Low-quality    | Genome-fragment | NA              | 0.42  | 0   |
| SI_k141_176981                               | 1819  | No | NA | 0  | 1  | Not-determined | Genome-fragment | NA              | 2.39  | 0   |
| SI4_k141_108384                              | 1499  | No | NA | 1  | 0  | Low-quality    | Genome-fragment | NA              | 0     | 0   |
| SI_k141_294057                               | 2444  | No | NA | 0  | 1  | Not-determined | Genome-fragment | NA              | 0     | 0   |
| SI_k141_195565                               | 2408  | No | NA | 0  | 2  | Not-determined | Genome-fragment | NA              | 0     | 0   |
| SI_k141_375674                               | 6554  | No | NA | 0  | 2  | Not-determined | Genome-fragment | NA              | 0     | 0   |
| SI8-final-viral-combined_k141_199834[full]   | 1499  | No | NA | 0  | 0  | Low-quality    | Genome-fragment | NA              | 1.75  | 0   |
| SI_k141_227834                               | 1284  | No | NA | 0  | 1  | Not-determined | Genome-fragment | NA              | 0     | 0   |
| SI_k141_294068                               | 1230  | No | NA | 0  | 1  | Not-determined | Genome-fragment | NA              | 0     | 0   |
| SI_k141_78484                                | 1123  | No | NA | 0  | 0  | Not-determined | Genome-fragment | NA              | 0     | 0   |
| SI_k141_261759                               | 2456  | No | NA | 0  | 0  | Not-determined | Genome-fragment | NA              | 0     | 0   |
| SI_k141_227847                               | 1023  | No | NA | 0  | 1  | Not-determined | Genome-fragment | NA              | 0     | 0   |
| SI9-final-viral-combined_k141_128110[full]   | 1500  | No | NA | 1  | 0  | Low-quality    | Genome-fragment | NA              | 3.78  | 0   |
| SI_k141_176997                               | 1277  | No | NA | 0  | 2  | Not-determined | Genome-fragment | NA              | 0     | 0   |
| SI9_k141_99042                               | 1500  | No | NA | 0  | 0  | Low-quality    | Genome-fragment | NA              | 2.86  | 0   |
| SI_k141_360071                               | 3382  | No | NA | 0  | 0  | Not-determined | Genome-fragment | NA              | 4.1   | 0   |
| SI11-final-viral-combined_k141_312160[full]  | 1500  | No | NA | 0  | 0  | Low-quality    | Genome-fragment | NA              | 2.86  | 0   |
| SI_k141_46230                                | 2004  | No | NA | 0  | 0  | Not-determined | Genome-fragment | NA              | 0     | 0   |
| SI_k141_145610                               | 2271  | No | NA | 0  | 1  | Not-determined | Genome-fragment | NA              | 0     | 0   |
| SI_k141_195618                               | 3448  | No | NA | 0  | 2  | Not-determined | Genome-fragment | NA              | 0     | 0   |
| SI_k141_111171                               | 1398  | No | NA | 0  | 1  | Not-determined | Genome-fragment | NA              | 0     | 0   |
| SI_k141_130155                               | 2432  | No | NA | 0  | 2  | Not-determined | Genome-fragment | NA              | 0     | 0   |
| SI11-final-viral-combined_k141_232933[full]  | 1500  | No | NA | 1  | 0  | Low-quality    | Genome-fragment | NA              | 0.95  | 0   |
| SI_k141_294133                               | 3582  | No | NA | 0  | 2  | Not-determined | Genome-fragment | NA              | 0     | 0   |
| SI_k141_261867                               | 1067  | No | NA | 0  | 1  | Not-determined | Genome-fragment | NA              | 0     | 0   |
| SI_k141_78535                                | 1860  | No | NA | 0  | 2  | Not-determined | Genome-fragment | NA              | 0     | 0   |
| SI_k141_244836                               | 3197  | No | NA | 9  | 0  | Medium-quality | Genome-fragment | NA              | 57.64 | 0   |
| SI1-final-viral-combined_k141_149900[full]   | 1500  | No | NA | 1  | 0  | Low-quality    | Genome-fragment | NA              | 29.92 | 0   |
| SI4-final-viral-combined_k141_28377[full]    | 1500  | No | NA | 0  | 0  | Low-quality    | Genome-fragment | NA              | 0.84  | 0   |
| SI3-final-viral-combined_k141_30656[full]    | 1500  | No | NA | 0  | 0  | Low-quality    | Genome-fragment | NA              | 2.48  | 0   |
| SI_k141_391933                               | 1792  | No | NA | 0  | 1  | Not-determined | Genome-fragment | NA              | 0     | 0   |
| SI5-final-viral-combined_k141_195413[full]   | 1500  | No | NA | 0  | 1  | Low-quality    | Genome-fragment | NA              | 3.73  | 0   |
| SI_k141_212405                               | 1959  | No | NA | 0  | 0  | Not-determined | Genome-fragment | NA              | 0     | 0   |
| SI7-final-viral-combined_k141_204684[full]   | 1500  | No | NA | 0  | 1  | Low-quality    | Genome-fragment | NA              | 2.07  | 0   |
| SI_k141_276846                               | 1148  | No | NA | 0  | 1  | Not-determined | Genome-fragment | NA              | 0     | 0   |
| SI_k141_195748                               | 1074  | No | NA | 0  | 0  | Not-determined | Genome-fragment | NA              | 0     | 0   |
| SI_k141_212430                               | 1009  | No | NA | 0  | 1  | Not-determined | Genome-fragment | NA              | 0     | 0   |
| SI_k141_161382                               | 18199 | No | NA | 0  | 31 | Not-determined | Genome-fragment | NA              | 0     | 0   |
| SI_k141_391955                               | 4268  | No | NA | 0  | 1  | Not-determined | Genome-fragment | NA              | 0     | 0   |
| SI_k141_130124                               | 60867 | No | NA | 18 | 0  | Complete       | High-quality    | Genome-fragment | NA    | 100 |
| SI_k141_261998                               | 1025  | No | NA | 0  | 1  | Not-determined | Genome-fragment | NA              | 0     | 0   |
| SI_k141_294179                               | 1674  | No | NA | 0  | 1  | Not-determined | Genome-fragment | NA              | 0     | 0   |
| SI_k141_227982                               | 1192  | No | NA | 0  | 0  | Not-determined | Genome-fragment | NA              | 0     | 0   |
| SI7-final-viral-combined_k141_105422[full]   | 1500  | No | NA | 2  | 0  | Low-quality    | Genome-fragment | NA              | 4.02  | 0   |
| SI_k141_46269                                | 2494  | No | NA | 0  | 0  | Not-determined | Genome-fragment | NA              | 0     | 0   |
| SI_k141_145690                               | 1067  | No | NA | 0  | 1  | Not-determined | Genome-fragment | NA              | 0     | 0   |
| SI_k141_360250                               | 1158  | No | NA | 0  | 0  | Not-determined | Genome-fragment | NA              | 0     | 0   |
| SI_k141_111310                               | 1092  | No | NA | 0  | 1  | Not-determined | Genome-fragment | NA              | 0     | 0   |
| SI_k141_375905                               | 8836  | No | NA | 0  | 8  | Not-determined | Genome-fragment | NA              | 0     | 0   |
| SI_k141_276908                               | 1174  | No | NA | 0  | 0  | Not-determined | Genome-fragment | NA              | 0     | 0   |
| SI_k141_96258                                | 1165  | No | NA | 0  | 1  | Not-determined | Genome-fragment | NA              | 0     | 0   |
| SI_k141_310660                               | 1750  | No | NA | 0  | 0  | Not-determined | Genome-fragment | NA              | 0     | 0   |
| SI2-final-viral-combined_k141_169768[full]   | 1500  | No | NA | 0  | 0  | Low-quality    | Genome-fragment | NA              | 2.17  | 0   |
| SI_k141_228047                               | 1332  | No | NA | 0  | 0  | Not-determined | Genome-fragment | NA              | 0     | 0   |
| SI_k141_276965                               | 1004  | No | NA | 0  | 1  | Not-determined | Genome-fragment | NA              | 0     | 0   |
| SI2_k141_341736                              | 1500  | No | NA | 0  | 0  | Low-quality    | Genome-fragment | NA              | 0.79  | 0   |
| SI_k141_130313                               | 1031  | No | NA | 0  | 3  | Not-determined | Genome-fragment | NA              | 0     | 0   |
| SI2_k141_11138                               | 1500  | No | NA | 0  | 0  | Low-quality    | Genome-fragment | NA              | 3.08  | 0   |
| SI4-final-viral-combined_k141_104933[full]   | 1500  | No | NA | 0  | 0  | Low-quality    | Genome-fragment | NA              | 0.93  | 0   |
| SI1_k141_351631                              | 1501  | No | NA | 0  | 0  | Low-quality    | Genome-fragment | NA              | 2.72  | 0   |
| SI_k141_277010                               | 3006  | No | NA | 0  | 2  | Not-determined | Genome-fragment | NA              | 0     | 0   |
| SI_k141_228123                               | 1023  | No | NA | 0  | 1  | Not-determined | Genome-fragment | NA              | 0     | 0   |
| SI_k141_195983                               | 2023  | No | NA | 0  | 0  | Not-determined | Genome-fragment | NA              | 0     | 0   |
| SI_k141_78677                                | 6683  | No | NA | 0  | 2  | Not-determined | Genome-fragment | NA              | 0     | 0   |
| SI_k141_111408                               | 4537  | No | NA | 0  | 4  | Not-determined | Genome-fragment | NA              | 0     | 0   |
| SI_k141_63244                                | 1850  | No | NA | 0  | 1  | Not-determined | Genome-fragment | NA              | 0     | 0   |
| SI3-final-viral-combined_k141_103080[full]   | 1501  | No | NA | 0  | 0  | Low-quality    | Genome-fragment | NA              | 2.29  | 0   |
| SI_k141_245059                               | 1039  | No | NA | 0  | 1  | Not-determined | Genome-fragment | NA              | 0     | 0   |
| SI_k141_327344                               | 1012  | No | NA | 0  | 1  | Not-determined | Genome-fragment | NA              | 0     | 0   |
| SI_k141_46367                                | 1021  | No | NA | 0  | 2  | Not-determined | Genome-fragment | NA              | 0     | 0   |
| SI_k141_294358                               | 1383  | No | NA | 0  | 1  | Not-determined | Genome-fragment | NA              | 0     | 0   |
| SI_k141_376106                               | 1512  | No | NA | 0  | 1  | Not-determined | Genome-fragment | NA              | 0     | 0   |
| SI_k141_177495                               | 1135  | No | NA | 0  | 1  | Not-determined | Genome-fragment | NA              | 0     | 0   |
| SI_k141_145933                               | 2124  | No | NA | 0  | 1  | Not-determined | Genome-fragment | NA              | 0     | 0   |
| SI_k141_14189                                | 1082  | No | NA | 0  | 0  | Not-determined | Genome-fragment | NA              | 0     | 0   |
| SI_k141_392096                               | 1198  | No | NA | 0  | 0  | Not-determined | Genome-fragment | NA              | 0     | 0   |
| SI7-final-viral-combined_k141_115834[full]   |       |    |    |    |    |                |                 |                 |       |     |



|                                              |       |     |    |      |   |                |                 |                 |       |
|----------------------------------------------|-------|-----|----|------|---|----------------|-----------------|-----------------|-------|
| SL_k141_294751                               | 1630  | No  | NA | 0    | 1 | Not-determined | Genome-fragment | NA              | 0     |
| SL_k141_327733                               | 3107  | No  | NA | 0    | 0 | Not-determined | Genome-fragment | NA              | 0     |
| SL_k141_376420                               | 2050  | No  | NA | 0    | 0 | Not-determined | Genome-fragment | NA              | 0     |
| SL_k141_79081                                | 5022  | No  | NA | 0    | 2 | Not-determined | Genome-fragment | NA              | 0     |
| SL_k141_14441                                | 1258  | No  | NA | 0    | 2 | Not-determined | Genome-fragment | NA              | 0     |
| S9-final-viral-combined_k141_117521 full     | 1502  | No  | NA | 0    | 0 | Low-quality    | Genome-fragment | NA              | 3.88  |
| SL_k141_177897                               | 1018  | No  | NA | 0    | 1 | Not-determined | Genome-fragment | NA              | 0     |
| SL_k141_130686                               | 1309  | No  | NA | 0    | 1 | Not-determined | Genome-fragment | NA              | 0     |
| SL_k141_341628                               | 2412  | No  | NA | 0    | 1 | Not-determined | Genome-fragment | NA              | 0     |
| SL_k141_212940                               | 59765 | No  | NA | 36   | 1 | High-quality   | High-quality    | 99.32           | 0     |
| SL_k141_342631                               | 1772  | No  | NA | 0    | 1 | Not-determined | Genome-fragment | NA              | 0     |
| SL_k141_637156                               | 7597  | No  | NA | 0    | 2 | Not-determined | Genome-fragment | NA              | 0     |
| SL_k141_294822                               | 1089  | No  | NA | 0    | 1 | Not-determined | Genome-fragment | NA              | 0     |
| S11-final-viral-combined_k141_1903551 full   | 1502  | No  | NA | 0    | 0 | Low-quality    | Genome-fragment | NA              | 0.95  |
| SL_k141_360724                               | 1439  | No  | NA | 0    | 1 | Not-determined | Genome-fragment | NA              | 0     |
| SL_k141_391479                               | 2312  | No  | NA | 0    | 1 | Not-determined | Genome-fragment | NA              | 0     |
| SL_k141_360751                               | 1295  | No  | NA | 0    | 0 | Not-determined | Genome-fragment | NA              | 0     |
| SL_k141_177981                               | 1124  | No  | NA | 0    | 1 | Not-determined | Genome-fragment | NA              | 0     |
| S4-final-viral-combined_k141_2716381 full    | 1502  | No  | NA | 3    | 0 | Low-quality    | Genome-fragment | NA              | 1.1   |
| SL_k141_311393                               | 1329  | No  | NA | 0    | 1 | Not-determined | Genome-fragment | NA              | 0     |
| SL_k141_311408                               | 2492  | No  | NA | 0    | 0 | Not-determined | Genome-fragment | NA              | 0     |
| SL_k141_327852                               | 7740  | No  | NA | 0    | 6 | Not-determined | Genome-fragment | NA              | 0     |
| S3-final-viral-combined_k141_402711 full     | 1502  | No  | NA | 0    | 1 | Low-quality    | Genome-fragment | NA              | 0.81  |
| S7_k141_78975                                | 1502  | No  | NA | 0    | 0 | Low-quality    | Genome-fragment | NA              | 1.99  |
| SL_k141_342775                               | 1033  | No  | NA | 0    | 0 | Not-determined | Genome-fragment | NA              | 0     |
| SL_k141_277497                               | 1056  | No  | NA | 0    | 0 | Not-determined | Genome-fragment | NA              | 0     |
| SL_k141_376568                               | 1194  | No  | NA | 0    | 0 | Not-determined | Genome-fragment | NA              | 0     |
| SL_k141_327866                               | 1332  | No  | NA | 0    | 0 | Not-determined | Genome-fragment | NA              | 0     |
| SL_k141_36912                                | 1200  | No  | NA | 0    | 0 | Not-determined | Genome-fragment | NA              | 0     |
| SL_k141_327894                               | 3459  | No  | NA | 0    | 1 | Not-determined | Genome-fragment | NA              | 0     |
| SL_k141_178064                               | 2554  | No  | NA | 0    | 1 | Not-determined | Genome-fragment | NA              | 0     |
| SL_k141_360859                               | 4809  | No  | NA | 0    | 0 | Not-determined | Genome-fragment | NA              | 0     |
| SL_k141_162184                               | 1000  | No  | NA | 0    | 0 | Not-determined | Genome-fragment | NA              | 0     |
| SL_k141_360866                               | 3023  | No  | NA | 0    | 2 | Not-determined | Genome-fragment | NA              | 0     |
| SL_k141_360872                               | 3325  | No  | NA | 0    | 0 | Not-determined | Genome-fragment | NA              | 0     |
| SL_k141_162208                               | 1073  | No  | NA | 0    | 1 | Not-determined | Genome-fragment | NA              | 0     |
| SL_k141_228536                               | 7871  | No  | NA | 0    | 1 | Not-determined | Genome-fragment | NA              | 0     |
| SL_k141_162216                               | 1256  | No  | NA | 0    | 0 | Not-determined | Genome-fragment | NA              | 0     |
| SL_k141_178112                               | 1000  | No  | NA | 0    | 1 | Not-determined | Genome-fragment | NA              | 0     |
| SL_k141_327924                               | 1011  | No  | NA | 0    | 0 | Not-determined | Genome-fragment | NA              | 0     |
| SL_k141_311510                               | 1184  | No  | NA | 0    | 1 | Not-determined | Genome-fragment | NA              | 0     |
| SL_k141_392641                               | 1258  | No  | NA | 0    | 1 | Not-determined | Genome-fragment | NA              | 0     |
| SL_k141_146322                               | 1602  | No  | NA | 0    | 0 | Not-determined | Genome-fragment | NA              | 0     |
| SL_k141_327945                               | 1554  | No  | NA | 0    | 2 | Not-determined | Genome-fragment | NA              | 0     |
| SL_k141_262779                               | 6432  | No  | NA | 0    | 5 | Not-determined | Genome-fragment | NA              | 0     |
| SL_k141_376598                               | 3395  | No  | NA | 0    | 3 | Not-determined | Genome-fragment | NA              | 0     |
| SL_k141_14739                                | 1084  | No  | NA | 0    | 1 | Not-determined | Genome-fragment | NA              | 0     |
| SL_k141_311577                               | 2212  | No  | NA | 0    | 2 | Not-determined | Genome-fragment | NA              | 2.85  |
| S17-final-viral-combined_k141_1604201 full   | 1502  | No  | NA | 2    | 0 | Low-quality    | Genome-fragment | NA              | 2.85  |
| SL_k141_392862                               | 4645  | No  | NA | 0    | 3 | Not-determined | Genome-fragment | NA              | 0     |
| SL_k141_130656                               | 1307  | No  | NA | 0    | 1 | Not-determined | Genome-fragment | NA              | 0     |
| SL_k141_328014                               | 4896  | No  | NA | 0    | 0 | Not-determined | Genome-fragment | NA              | 0     |
| S12-final-viral-combined_k141_3606221 full   | 1502  | No  | NA | 1    | 0 | Low-quality    | Genome-fragment | NA              | 1.01  |
| SL_k141_162338                               | 2051  | No  | NA | 0    | 3 | Not-determined | Genome-fragment | NA              | 0     |
| SL_k141_14800                                | 1234  | No  | NA | 0    | 2 | Not-determined | Genome-fragment | NA              | 0     |
| SL_k141_178216                               | 3099  | No  | NA | 0    | 1 | Not-determined | Genome-fragment | NA              | 0     |
| S12_k141_251467                              | 1502  | No  | NA | 0    | 1 | Low-quality    | Genome-fragment | NA              | 0.52  |
| SL_k141_338051                               | 1010  | No  | NA | 0    | 0 | Not-determined | Genome-fragment | NA              | 0     |
| SL_k141_146415                               | 1306  | No  | NA | 0    | 0 | Not-determined | Genome-fragment | NA              | 0     |
| S8_k141_206093                               | 1502  | No  | NA | 1    | 0 | Low-quality    | Genome-fragment | NA              | 1.9   |
| SL_k141_292732                               | 10718 | No  | NA | 0    | 2 | Not-determined | Genome-fragment | NA              | 0     |
| S9-final-viral-combined_k141_73971 full      | 1503  | No  | NA | 0    | 0 | Low-quality    | Genome-fragment | NA              | 4.32  |
| SL_k141_328073                               | 3330  | No  | NA | 0    | 3 | Not-determined | Genome-fragment | NA              | 0     |
| SL_k141_245951                               | 1837  | No  | NA | 0    | 2 | Not-determined | Genome-fragment | NA              | 0     |
| S11_k141_262568                              | 1503  | No  | NA | 0    | 0 | Low-quality    | Genome-fragment | NA              | 3.89  |
| SL_k141_79418                                | 1418  | No  | NA | 0    | 1 | Not-determined | Genome-fragment | NA              | 0     |
| SL_k141_178281                               | 1001  | No  | NA | 0    | 0 | Not-determined | Genome-fragment | NA              | 0     |
| SL_k141_392753                               | 1310  | No  | NA | 0    | 1 | Not-determined | Genome-fragment | NA              | 0     |
| S1-final-viral-combined_k141_2075681 full    | 1503  | No  | NA | 0    | 2 | Low-quality    | Genome-fragment | NA              | 3.41  |
| SL_k141_178317                               | 1883  | No  | NA | 0    | 1 | Not-determined | Genome-fragment | NA              | 0     |
| SL_k141_262816                               | 1896  | No  | NA | 0    | 2 | Not-determined | Genome-fragment | NA              | 0     |
| SL_k141_361016                               | 3758  | No  | NA | 0    | 1 | Not-determined | Genome-fragment | NA              | 0     |
| SL_k141_64130                                | 1531  | No  | NA | 0    | 1 | Not-determined | Genome-fragment | NA              | 0     |
| SL_k141_311756                               | 1931  | No  | NA | 0    | 0 | Not-determined | Genome-fragment | NA              | 0     |
| SL_k141_311758                               | 1054  | No  | NA | 0    | 0 | Not-determined | Genome-fragment | NA              | 0     |
| S3-final-viral-combined_k141_1142411 H2gene  | 1503  | No  | NA | 1    | 0 | Low-quality    | Genome-fragment | NA              | 2.84  |
| SL_k141_178353                               | 2750  | No  | NA | 0    | 1 | Not-determined | Genome-fragment | NA              | 0     |
| SL_k141_178375                               | 1341  | No  | NA | 0    | 0 | Not-determined | Genome-fragment | NA              | 0     |
| SL_k141_262846                               | 1710  | No  | NA | 0    | 1 | Not-determined | Genome-fragment | NA              | 0     |
| S17-final-viral-combined_k141_1280711 full   | 1503  | No  | NA | 1    | 0 | Low-quality    | Genome-fragment | NA              | 3.67  |
| S4-final-viral-combined_k141_341371 full     | 1503  | No  | NA | 0    | 0 | Low-quality    | Genome-fragment | NA              | 2.45  |
| SL_k141_213084                               | 1865  | No  | NA | 0    | 1 | Not-determined | Genome-fragment | NA              | 0     |
| SL_k141_597218                               | 1612  | No  | NA | 0    | 3 | Not-determined | Genome-fragment | NA              | 0     |
| S8-final-viral-combined_k141_291651 full     | 1503  | No  | NA | 1    | 0 | Low-quality    | Genome-fragment | NA              | 3.7   |
| SL_k141_112034                               | 1077  | No  | NA | 0    | 1 | Not-determined | Genome-fragment | NA              | 0     |
| SL_k141_295232                               | 1568  | No  | NA | 0    | 1 | Not-determined | Genome-fragment | NA              | 0     |
| SL_k141_46612                                | 1164  | No  | NA | 0    | 1 | Not-determined | Genome-fragment | NA              | 0     |
| SL_k141_285234                               | 2735  | No  | NA | 0    | 0 | Not-determined | Genome-fragment | NA              | 0     |
| SL_k141_79574                                | 1073  | No  | NA | 0    | 1 | Not-determined | Genome-fragment | NA              | 0     |
| S8-final-viral-combined_k141_772491 full     | 1503  | No  | NA | 0    | 0 | Low-quality    | Genome-fragment | NA              | 1.44  |
| S8-final-viral-combined_k141_2315381 H2gene  | 1503  | No  | NA | 1    | 0 | Low-quality    | Genome-fragment | NA              | 2.45  |
| SL_k141_376912                               | 3720  | No  | NA | 0    | 2 | Not-determined | Genome-fragment | NA              | 0     |
| S11-final-viral-combined_k141_3221191 H2gene | 1504  | No  | NA | 1    | 0 | Low-quality    | Genome-fragment | NA              | 1.73  |
| SL_k141_112075                               | 2854  | No  | NA | 0    | 2 | Not-determined | Genome-fragment | NA              | 0     |
| SL_k141_14558                                | 1876  | No  | NA | 0    | 2 | Not-determined | Genome-fragment | NA              | 0     |
| SL_k141_79608                                | 1258  | No  | NA | 0    | 0 | Not-determined | Genome-fragment | NA              | 0     |
| SL_k141_97302                                | 1103  | No  | NA | 0    | 1 | Not-determined | Genome-fragment | NA              | 0     |
| S1-final-viral-combined_k141_822901 full     | 1504  | No  | NA | 0    | 0 | Low-quality    | Genome-fragment | NA              | 1.1   |
| SL_k141_277900                               | 5152  | No  | NA | 0    | 1 | Not-determined | Genome-fragment | NA              | 0     |
| SL_k141_146593                               | 1739  | No  | NA | 0    | 1 | Not-determined | Genome-fragment | NA              | 0     |
| SL_k141_178517                               | 3059  | No  | NA | 0    | 3 | Not-determined | Genome-fragment | NA              | 0     |
| SL_k141_14995                                | 1147  | No  | NA | 0    | 0 | Not-determined | Genome-fragment | NA              | 0     |
| SL_k141_30791                                | 1458  | No  | NA | 0    | 0 | Not-determined | Genome-fragment | NA              | 0     |
| SL_k141_262957                               | 1188  | No  | NA | 0    | 1 | Not-determined | Genome-fragment | NA              | 0     |
| SL_k141_376989                               | 1075  | No  | NA | 0    | 0 | Not-determined | Genome-fragment | NA              | 0     |
| SL_k141_311941                               | 6384  | Yes | NA | 3223 | 1 | 2              | Not-determined  | Genome-fragment | 49.51 |
| SL_k141_146653                               | 1271  | No  | NA | 0    | 0 | Not-determined | Genome-fragment | NA              | 0     |
| S1-final-viral-combined_k141_1693931 full    | 1504  | No  | NA | 0    | 0 | Low-quality    | Genome-fragment | NA              | 2.8   |
| S17-final-viral-combined_k141_816251 full    | 1504  | No  | NA | 0    | 0 | Low-quality    | Genome-fragment | NA              | 3.45  |
| S17-final-viral-combined_k141_919691 full    | 1504  | No  | NA | 0    | 2 | Low-quality    | Genome-fragment | NA              | 0.82  |
| SL_k141_15091                                | 1501  | No  | NA | 0    | 1 | Not-determined | Genome-fragment | NA              | 0     |
| SL_k141_30944                                | 1127  | No  | NA | 0    | 1 | Not-determined | Genome-fragment | NA              | 0     |
| SL_k141_30954                                | 1260  | No  | NA | 0    | 0 | Not-determined | Genome-fragment | NA              | 0     |
| SL_k141_162174                               | 3814  | No  | NA | 0    | 1 | Not-determined | Genome-fragment | NA              | 0     |
| SL_k141_328489                               | 1977  | No  | NA | 0    | 0 | Not-determined | Genome-fragment | NA              | 0     |
| S17-final-viral-combined_k141_1983711 full   | 1504  | No  | NA | 0    | 0 | Low-quality    | Genome-fragment | NA              | 2.07  |
| SL_k141_242380                               | 1446  | No  | NA | 0    | 1 | Not-determined | Genome-fragment | NA              | 0     |
| SL_k141_196965                               | 1048  | No  | NA | 0    | 0 | Not-determined | Genome-fragment | NA              | 0     |
| SL_k141_146818                               | 1190  | No  | NA | 0    | 0 | Not-determined | Genome-fragment | NA              | 0     |
| S12-final-viral-combined_k141_3986401 full   | 1504  | No  | NA | 0    | 2 | Low-quality    | Genome-fragment | NA              | 2.2   |
| S12_k141_365515                              | 1504  | No  | NA | 0    | 0 | Low-quality    | Genome-fragment | NA              | 2.73  |
| SL_k141_79928                                | 3058  | No  | NA | 0    | 1 | Not-determined | Genome-fragment | NA              | 0     |
| S4_k141_159594                               | 1504  | No  | NA | 0    | 2 | Low-quality    | Genome-fragment | NA              | 0.64  |
| SL_k141_361406                               | 2123  | No  | NA | 0    | 1 | Not-determined | Genome-fragment | NA              | 0     |
| SL_k141_328528                               | 2130  | No  | NA | 0    | 2 | Not-determined | Genome-fragment | NA              | 0     |
| S6-final-viral-combined_k141_1324161 full    | 1504  | No  | NA | 0    | 0 | Low-quality    | Genome-fragment | NA              | 1.62  |
| SL_k141_47001                                | 1903  | No  | NA | 0    | 2 | Not-determined | Genome-fragment | NA              | 0     |
| SL_k141_47014                                | 2671  | No  | NA | 0    | 0 | Not-determined | Genome-fragment | NA              | 0     |
| SL_k141_377299                               | 2436  | No  | NA | 0    | 1 | Not-determined | Genome-fragment | NA              | 0     |
| S9-final-viral-combined_k141_1094461 full    | 1505  | No  | NA | 1    | 0 | Low-quality    | Genome-fragment | NA              | 3.9   |
| SL_k141_162373                               | 2036  | No  | NA | 0    | 1 | Not-determined | Genome-fragment | NA              | 0     |
| S11-final-viral-combined_k141_1584051 full   | 1505  | No  | NA | 1    | 0 | Low-quality    | Genome-fragment | NA              | 4.22  |
| SL_k141_64476                                | 1560  | No  | NA | 0    | 1 | Not-determined | Genome-fragment | NA              | 0     |
| SL_k141_361472                               | 3600  | No  | NA | 0    | 1 | Not-determined | Genome-fragment | NA              | 0     |
| SL_k141_244239                               | 1505  | No  | NA | 0    | 1 | Low-quality    | Genome-fragment | NA              | 0.83  |
| SL_k141_197081                               | 1047  | No  | NA | 0    | 0 | Not-determined | Genome-fragment | NA              | 0     |
| SL_k141_263215                               | 7662  | No  | NA | 0    | 3 | Not-determined | Genome-fragment | NA              | 0     |
| SL_k141_246239                               | 4053  | No  | NA | 0    | 3 | Not-determined | Genome-fragment | NA              | 0     |
| S7-final-viral-combined_k141_633131 H2gene   | 1505  | No  | NA | 1    | 0 | Low-quality    | Genome-fragment | NA              | 3.29  |
| SL_k141_15274                                | 1039  | No  | NA | 0    | 1 | Not-determined | Genome-fragment | NA              | 0     |
| SL_k141_64493                                | 1044  | No  | NA | 0    | 1 | Not-determined | Genome-fragment | NA              | 0     |
| SL_k141_377351                               | 6497  | No  | NA | 0    | 3 | Not-determined | Genome-fragment | NA              | 0     |
| SL_k141_31155                                | 11507 | No  | NA | 0    | 0 | Not-determined | Genome-fragment | NA              | 0     |
| SL_k141_295646                               | 1204  | No  | NA | 0    | 2 | Not-determined | Genome-fragment | NA              | 0     |
| SL_k141_328617                               | 1517  | No  | NA | 0    | 1 | Not-determined | Genome-fragment | NA              | 0     |
| SL_k141_31170                                | 1047  | No  | NA |      |   |                |                 |                 |       |



|                                              |        |     |    |     |   |                |                 |                 |      |       |
|----------------------------------------------|--------|-----|----|-----|---|----------------|-----------------|-----------------|------|-------|
| SL_k141_179241                               | 1949   | No  | NA | 0   | 1 | Not-determined | Genome-fragment | NA              | 0    |       |
| S11-final-viral-combined_k141_322943}[full   | 1506   | No  | NA | 0   | 1 | Low-quality    | Genome-fragment | 0.93            | 0    |       |
| S11-final-viral-combined_k141_321633}[full   | 1506   | No  | NA | 0   | 1 | Low-quality    | Genome-fragment | 2.01            | 0    |       |
| SL_k141_112452                               | 1630   | No  | NA | 0   | 0 | Not-determined | Genome-fragment | NA              | 0    |       |
| S11-final-viral-combined_k141_231276}[full   | 1506   | No  | NA | 0   | 1 | Low-quality    | Genome-fragment | 1.02            | 0    |       |
| S11-final-viral-combined_k141_349273}[H2gene | 1506   | No  | NA | 0   | 0 | Low-quality    | Genome-fragment | 2.71            | 0    |       |
| SL_k141_80367                                | 1984   | No  | NA | 0   | 0 | Not-determined | Genome-fragment | NA              | 0    |       |
| S12-final-viral-combined_k141_211827}[full   | 1506   | No  | NA | 0   | 2 | Low-quality    | Genome-fragment | 1.14            | 0    |       |
| SL_k141_15610                                | 1350   | No  | NA | 0   | 1 | Not-determined | Genome-fragment | NA              | 0    |       |
| SL_k141_163280                               | 2325   | No  | NA | 0   | 2 | Not-determined | Genome-fragment | NA              | 0    |       |
| S2_k141_55443                                | 1506   | No  | NA | 0   | 1 | Low-quality    | Genome-fragment | 1.11            | 0    |       |
| SL_k141_361726                               | 1500   | No  | NA | 0   | 0 | Not-determined | Genome-fragment | NA              | 0    |       |
| S9-final-viral-combined_k141_59660}[full     | 1507   | No  | NA | 0   | 1 | Low-quality    | Genome-fragment | 1.19            | 0    |       |
| SL_k141_64882                                | 4207   | No  | NA | 0   | 0 | Not-determined | Genome-fragment | NA              | 0    |       |
| SL_k141_47387                                | 1004   | No  | NA | 0   | 0 | Not-determined | Genome-fragment | NA              | 0    |       |
| S11-final-viral-combined_k141_225378}[full   | 1507   | No  | NA | 0   | 0 | Low-quality    | Genome-fragment | 1.74            | 0    |       |
| SL_k141_131609                               | 1128   | No  | NA | 0   | 0 | Not-determined | Genome-fragment | NA              | 0    |       |
| SL_k141_278433                               | 1150   | No  | NA | 0   | 0 | Not-determined | Genome-fragment | NA              | 0    |       |
| SL_k141_212791                               | 2322   | No  | NA | 0   | 1 | Not-determined | Genome-fragment | NA              | 0    |       |
| SL_k141_179314                               | 1523   | No  | NA | 0   | 1 | Not-determined | Genome-fragment | NA              | 0    |       |
| SL_k141_246477                               | 1043   | No  | NA | 0   | 1 | Not-determined | Genome-fragment | NA              | 0    |       |
| SL_k141_59114                                | 1420   | No  | NA | 0   | 1 | Not-determined | Genome-fragment | NA              | 0    |       |
| SL_k141_393320                               | 1464   | No  | NA | 0   | 1 | Not-determined | Genome-fragment | NA              | 0    |       |
| SL_k141_179362                               | 1455   | No  | NA | 0   | 1 | Not-determined | Genome-fragment | NA              | 0    |       |
| SL_k141_25374                                | 1507   | Yes | NA | 237 | 1 | 1              | Low-quality     | Genome-fragment | 0.13 | 84.27 |
| SL_k141_47453                                | 1325   | No  | NA | 0   | 0 | Not-determined | Genome-fragment | NA              | 0    |       |
| SL_k141_393353                               | 1293   | No  | NA | 0   | 1 | Not-determined | Genome-fragment | NA              | 0    |       |
| SL_k141_39153                                | 7886   | No  | NA | 0   | 2 | Not-determined | Genome-fragment | NA              | 0    |       |
| SL_k141_377810                               | 1103   | No  | NA | 0   | 2 | Not-determined | Genome-fragment | NA              | 0    |       |
| SL_k141_246528                               | 1121   | No  | NA | 0   | 0 | Not-determined | Genome-fragment | NA              | 0    |       |
| SL_k141_278601                               | 1621   | No  | NA | 0   | 2 | Not-determined | Genome-fragment | NA              | 0    |       |
| SL_k141_293965                               | 1507   | No  | NA | 0   | 2 | Low-quality    | Genome-fragment | 3.17            | 0    |       |
| SL_k141_296126                               | 1461   | No  | NA | 0   | 0 | Not-determined | Genome-fragment | NA              | 0    |       |
| SL_k141_147362                               | 1032   | No  | NA | 0   | 1 | Not-determined | Genome-fragment | NA              | 0    |       |
| SL_k141_278655                               | 6103   | No  | NA | 0   | 7 | Not-determined | Genome-fragment | NA              | 0    |       |
| SL_k141_15829                                | 1316   | No  | NA | 0   | 0 | Not-determined | Genome-fragment | NA              | 0    |       |
| SL_k141_15830                                | 1360   | No  | NA | 0   | 1 | Not-determined | Genome-fragment | NA              | 0    |       |
| SL_k141_179582                               | 1481   | No  | NA | 0   | 0 | Not-determined | Genome-fragment | NA              | 0    |       |
| SL_k141_147431                               | 1965   | No  | NA | 0   | 1 | Not-determined | Genome-fragment | NA              | 0    |       |
| SL_k141_278720                               | 1253   | No  | NA | 0   | 0 | Not-determined | Genome-fragment | NA              | 0    |       |
| S3-final-viral-combined_k141_17987}[full     | 1507   | No  | NA | 2   | 0 | Low-quality    | Genome-fragment | 4.05            | 0    |       |
| SL_k141_246444                               | 1704   | No  | NA | 0   | 2 | Not-determined | Genome-fragment | NA              | 0    |       |
| S17-final-viral-combined_k141_67376}[full    | 1507   | No  | NA | 0   | 0 | Low-quality    | Genome-fragment | 3.41            | 0    |       |
| S12-final-viral-combined_k141_123716}[full   | 1507   | No  | NA | 1   | 0 | Low-quality    | Genome-fragment | 2.29            | 0    |       |
| SL_k141_361926                               | 1219   | No  | NA | 0   | 0 | Not-determined | Genome-fragment | NA              | 0    |       |
| SL_k141_344060                               | 2604   | No  | NA | 0   | 0 | Not-determined | Genome-fragment | NA              | 0    |       |
| S2-final-viral-combined_k141_33248}[full     | 1507   | No  | NA | 1   | 0 | Low-quality    | Genome-fragment | 2.55            | 0    |       |
| SL_k141_65210                                | 5587   | No  | NA | 0   | 1 | Not-determined | Genome-fragment | NA              | 0    |       |
| S2-final-viral-combined_k141_158809}[H2gene  | 1507   | No  | NA | 2   | 0 | Low-quality    | Genome-fragment | 3.18            | 0    |       |
| SL_k141_112778                               | 2217   | No  | NA | 0   | 0 | Not-determined | Genome-fragment | NA              | 0    |       |
| SL_k141_16003                                | 3289   | No  | NA | 0   | 0 | Not-determined | Genome-fragment | NA              | 0    |       |
| SL_k141_162819                               | 2346   | No  | NA | 0   | 1 | Not-determined | Genome-fragment | NA              | 0    |       |
| SL_k141_179691                               | 1329   | No  | NA | 0   | 1 | Not-determined | Genome-fragment | NA              | 0    |       |
| SL_k141_163634                               | 1448   | No  | NA | 0   | 2 | Not-determined | Genome-fragment | NA              | 0    |       |
| SL_k141_59405                                | 1488   | No  | NA | 0   | 1 | Not-determined | Genome-fragment | NA              | 0    |       |
| SL_k141_378089                               | 2422   | No  | NA | 0   | 2 | Not-determined | Genome-fragment | NA              | 0    |       |
| S4-final-viral-combined_k141_57112}[full     | 1507   | No  | NA | 0   | 1 | Low-quality    | Genome-fragment | 2.11            | 0    |       |
| S4-final-viral-combined_k141_39000}[full     | 1508   | No  | NA | 0   | 0 | Low-quality    | Genome-fragment | 5.9             | 0    |       |
| S11-final-viral-combined_k141_127245}[full   | 1508   | No  | NA | 3   | 0 | Low-quality    | Genome-fragment | 2.49            | 0    |       |
| SL_k141_393696                               | 4889   | No  | NA | 0   | 1 | Not-determined | Genome-fragment | NA              | 0    |       |
| SL_k141_344198                               | 1035   | No  | NA | 0   | 1 | Not-determined | Genome-fragment | NA              | 0    |       |
| SL_k141_246760                               | 1574   | No  | NA | 0   | 2 | Not-determined | Genome-fragment | NA              | 0    |       |
| S1-final-viral-combined_k141_47634}[full     | 1508   | No  | NA | 0   | 1 | Low-quality    | Genome-fragment | 2.84            | 0    |       |
| S17-k141_209681                              | 1508   | No  | NA | 4   | 0 | Low-quality    | Genome-fragment | 4.96            | 0    |       |
| SL_k141_31627                                | 1374   | No  | NA | 0   | 0 | Not-determined | Genome-fragment | NA              | 0    |       |
| SL_k141_393747                               | 1982   | No  | NA | 0   | 1 | Not-determined | Genome-fragment | NA              | 0    |       |
| SL_k141_393758                               | 1680   | No  | NA | 0   | 1 | Not-determined | Genome-fragment | NA              | 0    |       |
| SL_k141_65357                                | 1278   | No  | NA | 0   | 1 | Not-determined | Genome-fragment | NA              | 0    |       |
| SL_k141_229861                               | 3072   | No  | NA | 0   | 1 | Not-determined | Genome-fragment | NA              | 0    |       |
| SL_k141_279021                               | 1730   | No  | NA | 0   | 1 | Not-determined | Genome-fragment | NA              | 0    |       |
| SL_k141_31724                                | 4663   | No  | NA | 0   | 3 | Not-determined | Genome-fragment | NA              | 0    |       |
| SL_k141_16142                                | 1325   | No  | NA | 0   | 0 | Not-determined | Genome-fragment | NA              | 0    |       |
| S12-final-viral-combined_k141_257165}[full   | 1508   | No  | NA | 0   | 0 | Low-quality    | Genome-fragment | 0.56            | 0    |       |
| SL_k141_31760                                | 2896   | No  | NA | 0   | 2 | Not-determined | Genome-fragment | NA              | 0    |       |
| SL_k141_179998                               | 1037   | No  | NA | 0   | 1 | Not-determined | Genome-fragment | NA              | 0    |       |
| SL_k141_344383                               | 1013   | No  | NA | 0   | 1 | Not-determined | Genome-fragment | NA              | 0    |       |
| SL_k141_230016                               | 3470   | No  | NA | 0   | 1 | Not-determined | Genome-fragment | NA              | 0    |       |
| SL_k141_344466                               | 1114   | No  | NA | 0   | 0 | Not-determined | Genome-fragment | NA              | 0    |       |
| SL_k141_147715                               | 1203   | No  | NA | 0   | 0 | Not-determined | Genome-fragment | NA              | 0    |       |
| SL_k141_147722                               | 1687   | No  | NA | 0   | 2 | Not-determined | Genome-fragment | NA              | 0    |       |
| SL_k141_147733                               | 3026   | No  | NA | 0   | 1 | Not-determined | Genome-fragment | NA              | 0    |       |
| SL_k141_163964                               | 4855   | No  | NA | 0   | 2 | Not-determined | Genome-fragment | NA              | 0    |       |
| SL_k141_279171                               | 1072   | No  | NA | 0   | 1 | Not-determined | Genome-fragment | NA              | 0    |       |
| SL_k141_344526                               | 3172   | No  | NA | 0   | 2 | Not-determined | Genome-fragment | NA              | 0    |       |
| SL_k141_655558                               | 1000   | No  | NA | 0   | 1 | Not-determined | Genome-fragment | NA              | 0    |       |
| SL_k141_230098                               | 1241   | No  | NA | 0   | 0 | Not-determined | Genome-fragment | NA              | 0    |       |
| SL_k141_378357                               | 1165   | No  | NA | 0   | 2 | Not-determined | Genome-fragment | NA              | 0    |       |
| SL_k141_394064                               | 2343   | No  | NA | 0   | 0 | Not-determined | Genome-fragment | NA              | 0    |       |
| SL_k141_31569                                | 1528   | No  | NA | 0   | 1 | Not-determined | Genome-fragment | NA              | 0    |       |
| S12-k141_17241                               | 1508   | No  | NA | 0   | 2 | Low-quality    | Genome-fragment | 0.64            | 0    |       |
| S8-k141_267086                               | 1508   | No  | NA | 1   | 0 | Low-quality    | Genome-fragment | 3.75            | 0    |       |
| SL_k141_230253                               | 1170   | No  | NA | 0   | 1 | Not-determined | Genome-fragment | NA              | 0    |       |
| SL_k141_147942                               | 1492   | No  | NA | 0   | 1 | Not-determined | Genome-fragment | NA              | 0    |       |
| S11-final-viral-combined_k141_319373}[full   | 1509   | No  | NA | 0   | 1 | Low-quality    | Genome-fragment | 0.9             | 0    |       |
| S3-k141_97941                                | 1509   | No  | NA | 1   | 0 | Low-quality    | Genome-fragment | 0.69            | 0    |       |
| SL_k141_230274                               | 1183   | No  | NA | 0   | 3 | Not-determined | Genome-fragment | NA              | 0    |       |
| SL_k141_81554                                | 1058   | No  | NA | 0   | 0 | Not-determined | Genome-fragment | NA              | 0    |       |
| S7-final-viral-combined_k141_167021}[full    | 1509   | No  | NA | 1   | 0 | Low-quality    | Genome-fragment | 2.5             | 0    |       |
| SL_k141_164222                               | 2500   | No  | NA | 0   | 0 | Not-determined | Genome-fragment | NA              | 0    |       |
| SL_k141_180302                               | 2652   | No  | NA | 0   | 2 | Not-determined | Genome-fragment | NA              | 0    |       |
| S12-final-viral-combined_k141_26804}[full    | 1509   | No  | NA | 0   | 1 | Low-quality    | Genome-fragment | 1.09            | 0    |       |
| SL_k141_344795                               | 1311   | No  | NA | 0   | 0 | Not-determined | Genome-fragment | NA              | 0    |       |
| SL_k141_81665                                | 1171   | No  | NA | 0   | 0 | Not-determined | Genome-fragment | NA              | 0    |       |
| SL_k141_394223                               | 1340   | No  | NA | 0   | 1 | Not-determined | Genome-fragment | NA              | 0    |       |
| S12-k141_246857                              | 1509   | No  | NA | 0   | 1 | Low-quality    | Genome-fragment | 0.99            | 0    |       |
| SL_k141_180442                               | 1191   | No  | NA | 0   | 2 | Not-determined | Genome-fragment | NA              | 0    |       |
| S2-k141_224619                               | 1509   | No  | NA | 0   | 1 | Low-quality    | Genome-fragment | 1               | 0    |       |
| SL_k141_164358                               | 5908   | No  | NA | 0   | 3 | Not-determined | Genome-fragment | NA              | 0    |       |
| SL_k141_113179                               | 1258   | No  | NA | 0   | 0 | Not-determined | Genome-fragment | NA              | 0    |       |
| SL_k141_344906                               | 3041   | No  | NA | 0   | 3 | Not-determined | Genome-fragment | NA              | 0    |       |
| SL_k141_344921                               | 3250   | No  | NA | 0   | 2 | Not-determined | Genome-fragment | NA              | 0    |       |
| SL_k141_279430                               | 1517   | No  | NA | 0   | 0 | Not-determined | Genome-fragment | NA              | 0    |       |
| S5-final-viral-combined_k141_180244}[full    | 1510   | No  | NA | 0   | 0 | Low-quality    | Genome-fragment | 2.56            | 0    |       |
| S7-final-viral-combined_k141_197011}[full    | 1510   | No  | NA | 1   | 0 | Low-quality    | Genome-fragment | 3.4             | 0    |       |
| SL_k141_23262                                | 1478   | No  | NA | 0   | 1 | Not-determined | Genome-fragment | NA              | 0    |       |
| SL_k141_32371                                | 3531   | No  | NA | 0   | 0 | Not-determined | Genome-fragment | NA              | 0    |       |
| SL_k141_279488                               | 6465   | No  | NA | 0   | 1 | Not-determined | Genome-fragment | NA              | 0    |       |
| SL_k141_48424                                | 3509   | No  | NA | 0   | 0 | Not-determined | Genome-fragment | NA              | 0    |       |
| S7-final-viral-combined_k141_138138}[full    | 1510   | No  | NA | 1   | 0 | Low-quality    | Genome-fragment | 3.25            | 0    |       |
| SL_k141_48448                                | 1663   | No  | NA | 0   | 0 | Not-determined | Genome-fragment | NA              | 0    |       |
| SL_k141_24403                                | 3012   | No  | NA | 0   | 2 | Not-determined | Genome-fragment | NA              | 0    |       |
| SL_k141_48455                                | 2027   | No  | NA | 0   | 2 | Not-determined | Genome-fragment | NA              | 0    |       |
| S12-final-viral-combined_k141_387111}[full   | 1510   | No  | NA | 0   | 2 | Low-quality    | Genome-fragment | 1.05            | 0    |       |
| SL_k141_32424                                | 3044   | No  | NA | 0   | 1 | Not-determined | Genome-fragment | NA              | 0    |       |
| SL_k141_48488                                | 1262   | No  | NA | 0   | 1 | Not-determined | Genome-fragment | NA              | 0    |       |
| SL_k141_32459                                | 1028   | No  | NA | 0   | 1 | Not-determined | Genome-fragment | NA              | 0    |       |
| SL_k141_48513                                | 1655   | No  | NA | 0   | 0 | Not-determined | Genome-fragment | NA              | 0    |       |
| SL_k141_657153                               | 1467   | No  | NA | 0   | 0 | Not-determined | Genome-fragment | NA              | 0    |       |
| SL_k141_180663                               | 1757   | No  | NA | 0   | 1 | Not-determined | Genome-fragment | NA              | 0    |       |
| SL_k141_32584                                | 4753   | No  | NA | 0   | 3 | Not-determined | Genome-fragment | NA              | 0    |       |
| SL_k141_180699                               | 17772  | No  | NA | 0   | 5 | Not-determined | Genome-fragment | NA              | 0    |       |
| SL_k141_48691                                | 2441   | No  | NA | 0   | 1 | Not-determined | Genome-fragment | NA              | 0    |       |
| S8-final-viral-combined_k141_71798}[full     | 1510   | No  | NA | 0   | 0 | Low-quality    | Genome-fragment | 2.94            | 0    |       |
| SL_k141_279603                               | 1225   | No  | NA | 0   | 0 | Not-determined | Genome-fragment | NA              | 0    |       |
| SL_k141_48724                                | 1213   | No  | NA | 0   | 0 | Not-determined | Genome-fragment | NA              | 0    |       |
| SL_k141_345166                               | 1025   | No  | NA | 0   | 0 | Not-determined | Genome-fragment | NA              | 0    |       |
| SL_k141_32725                                | 1177   | No  | NA | 0   | 2 | Not-determined | Genome-fragment | NA              | 0    |       |
| SL_k141_180798                               | 1077   | No  | NA | 0   | 0 | Not-determined | Genome-fragment | NA              | 0    |       |
| SL_k141_32750                                | 1036   | No  | NA | 0   | 0 | Not-determined | Genome-fragment | NA              | 0    |       |
| S8-k141_196658                               | 1510   | No  | NA | 0   | 1 | Low-quality    | Genome-fragment | 5.18            | 0    |       |
| SL_k141_279652                               | 1015   | No  | NA | 0   | 1 | Not-determined | Genome-fragment | NA              | 0    |       |
| SL_k141_114025                               | 3214   | No  | NA | 0   | 0 | Not-determined | Genome-fragment | NA              | 0    |       |
| SL_k141_394571                               | 101988 | No  | NA | 17  | 3 | Complete       | High-quality    | 100             | 0    |       |
| S12-final-viral-combined_k141_193312}[full   | 1511   | No  | NA | 2   | 0 | Low-quality    | Genome-fragment | 2.81            | 0    |       |
| S12-final-viral-combined_k141_181497}[full   | 1511   | No  | NA | 1   | 0 | Low-quality    | Genome-fragment | 3.8             | 0    |       |
| SL_k141_82107                                | 1068   | No  | NA | 0   | 1 |                |                 |                 |      |       |



|                                      |          |       |    |    |   |    |                |                 |      |   |
|--------------------------------------|----------|-------|----|----|---|----|----------------|-----------------|------|---|
| S12-final-viral-combined_k141_358183 | [full]   | 1512  | No | NA | 1 | 0  | Low-quality    | Genome-fragment | 4.15 | 0 |
| S3-final-viral-combined_k141_51798   | [full]   | 4119  | No | NA | 2 | 0  | Not-determined | Genome-fragment | NA   | 0 |
| S12_k141_300546                      |          | 1512  | No | NA | 0 | 0  | Low-quality    | Genome-fragment | 3.41 | 0 |
| S2-final-viral-combined_k141_157293  | [full]   | 1512  | No | NA | 1 | 0  | Low-quality    | Genome-fragment | 5.18 | 0 |
| S3-final-viral-combined_k141_89082   | [full]   | 3731  | No | NA | 0 | 2  | Not-determined | Genome-fragment | NA   | 0 |
| S3-final-viral-combined_k141_63347   | [full]   | 1040  | No | NA | 0 | 0  | Not-determined | Genome-fragment | NA   | 0 |
| S2-final-viral-combined_k141_134240  | [full]   | 1512  | No | NA | 0 | 1  | Low-quality    | Genome-fragment | 2.01 | 0 |
| S3-final-viral-combined_k141_46103   | [full]   | 3895  | No | NA | 0 | 3  | Not-determined | Genome-fragment | NA   | 0 |
| S3-final-viral-combined_k141_115104  | [full]   | 6170  | No | NA | 0 | 0  | Not-determined | Genome-fragment | NA   | 0 |
| S3-final-viral-combined_k141_34556   | [full]   | 1734  | No | NA | 0 | 2  | Not-determined | Genome-fragment | NA   | 0 |
| S3-final-viral-combined_k141_57565   | [full]   | 1320  | No | NA | 0 | 0  | Not-determined | Genome-fragment | NA   | 0 |
| S6_k141_85515                        |          | 1512  | No | NA | 0 | 0  | Low-quality    | Genome-fragment | 0.66 | 0 |
| S8-final-viral-combined_k141_47751   | [H2gene] | 1512  | No | NA | 1 | 0  | Low-quality    | Genome-fragment | 4.44 | 0 |
| S3-final-viral-combined_k141_115138  | [full]   | 3507  | No | NA | 0 | 1  | Not-determined | Genome-fragment | NA   | 0 |
| S3-final-viral-combined_k141_34625   | [full]   | 5349  | No | NA | 0 | 3  | Not-determined | Genome-fragment | NA   | 0 |
| S3-final-viral-combined_k141_36379   | [full]   | 1529  | No | NA | 0 | 3  | Not-determined | Genome-fragment | NA   | 0 |
| S3-final-viral-combined_k141_51849   | [full]   | 3389  | No | NA | 0 | 1  | Not-determined | Genome-fragment | NA   | 0 |
| S3-final-viral-combined_k141_58521   | [full]   | 1621  | No | NA | 0 | 1  | Not-determined | Genome-fragment | NA   | 0 |
| S8-final-viral-combined_k141_176721  | [H2gene] | 1512  | No | NA | 0 | 0  | Low-quality    | Genome-fragment | 0.98 | 0 |
| S3-final-viral-combined_k141_74848   | [full]   | 2001  | No | NA | 0 | 0  | Not-determined | Genome-fragment | NA   | 0 |
| S9-final-viral-combined_k141_52797   | [full]   | 1513  | No | NA | 0 | 1  | Low-quality    | Genome-fragment | 2.01 | 0 |
| S3-final-viral-combined_k141_30505   | [full]   | 1598  | No | NA | 0 | 2  | Not-determined | Genome-fragment | NA   | 0 |
| S3-final-viral-combined_k141_103622  | [full]   | 2576  | No | NA | 0 | 1  | Not-determined | Genome-fragment | NA   | 0 |
| S3-final-viral-combined_k141_126694  | [full]   | 1923  | No | NA | 0 | 2  | Not-determined | Genome-fragment | NA   | 0 |
| S3-final-viral-combined_k141_186748  | [full]   | 1513  | No | NA | 0 | 2  | Low-quality    | Genome-fragment | 0.5  | 0 |
| S3-final-viral-combined_k141_40378   | [full]   | 2092  | No | NA | 0 | 0  | Not-determined | Genome-fragment | NA   | 0 |
| S3-final-viral-combined_k141_221     | [full]   | 1790  | No | NA | 0 | 1  | Not-determined | Genome-fragment | NA   | 0 |
| S3-final-viral-combined_k141_103641  | [full]   | 1824  | No | NA | 0 | 1  | Not-determined | Genome-fragment | NA   | 0 |
| S7-final-viral-combined_k141_239305  | [full]   | 1513  | No | NA | 0 | 2  | Low-quality    | Genome-fragment | 1.45 | 0 |
| S3-final-viral-combined_k141_132450  | [full]   | 3199  | No | NA | 0 | 3  | Not-determined | Genome-fragment | NA   | 0 |
| S3-final-viral-combined_k141_40380   | [full]   | 6809  | No | NA | 0 | 4  | Not-determined | Genome-fragment | NA   | 0 |
| S7_k141_21922                        |          | 1513  | No | NA | 0 | 1  | Low-quality    | Genome-fragment | 0.25 | 0 |
| S3-final-viral-combined_k141_115220  | [full]   | 7895  | No | NA | 0 | 1  | Not-determined | Genome-fragment | NA   | 0 |
| S3-final-viral-combined_k141_69190   | [full]   | 2004  | No | NA | 0 | 1  | Not-determined | Genome-fragment | NA   | 0 |
| S3-final-viral-combined_k141_115370  | [full]   | 2650  | No | NA | 0 | 0  | Not-determined | Genome-fragment | NA   | 0 |
| S7_k141_48136                        |          | 1513  | No | NA | 0 | 0  | Low-quality    | Genome-fragment | 2.53 | 0 |
| S3-final-viral-combined_k141_12098   | [full]   | 1317  | No | NA | 0 | 1  | Not-determined | Genome-fragment | NA   | 0 |
| S3-final-viral-combined_k141_40410   | [full]   | 1015  | No | NA | 0 | 1  | Not-determined | Genome-fragment | NA   | 0 |
| S12_k141_374550                      |          | 1513  | No | NA | 0 | 1  | Low-quality    | Genome-fragment | 1.16 | 0 |
| S3-final-viral-combined_k141_5938    | [full]   | 12804 | No | NA | 0 | 9  | Not-determined | Genome-fragment | NA   | 0 |
| S2_k141_58024                        |          | 1513  | No | NA | 0 | 0  | Low-quality    | Genome-fragment | 3.44 | 0 |
| S4-final-viral-combined_k141_125151  | [full]   | 1513  | No | NA | 0 | 2  | Low-quality    | Genome-fragment | 0.5  | 0 |
| S3-final-viral-combined_k141_92204   | [full]   | 2259  | No | NA | 0 | 1  | Not-determined | Genome-fragment | NA   | 0 |
| S3-final-viral-combined_k141_74975   | [full]   | 6971  | No | NA | 0 | 7  | Not-determined | Genome-fragment | NA   | 0 |
| S4-final-viral-combined_k141_36331   | [H2gene] | 1513  | No | NA | 0 | 0  | Low-quality    | Genome-fragment | 2.68 | 0 |
| S3-final-viral-combined_k141_10857   | [full]   | 9641  | No | NA | 0 | 0  | Not-determined | Genome-fragment | NA   | 0 |
| S3-final-viral-combined_k141_57652   | [full]   | 6007  | No | NA | 0 | 2  | Not-determined | Genome-fragment | NA   | 0 |
| S3-final-viral-combined_k141_28939   | [full]   | 2734  | No | NA | 0 | 2  | Not-determined | Genome-fragment | NA   | 0 |
| S8_k141_110903                       |          | 1513  | No | NA | 0 | 1  | Low-quality    | Genome-fragment | 0.29 | 0 |
| S9-final-viral-combined_k141_108099  | [full]   | 1514  | No | NA | 1 | 0  | Low-quality    | Genome-fragment | 3.32 | 0 |
| S3-final-viral-combined_k141_74992   | [full]   | 1882  | No | NA | 0 | 0  | Not-determined | Genome-fragment | NA   | 0 |
| S9-final-viral-combined_k141_20348   | [full]   | 1514  | No | NA | 0 | 1  | Low-quality    | Genome-fragment | 0.73 | 0 |
| S1-final-viral-combined_k141_2020    | [full]   | 1514  | No | NA | 1 | 0  | Low-quality    | Genome-fragment | 1.99 | 0 |
| S1_k141_155192                       |          | 1514  | No | NA | 0 | 1  | Low-quality    | Genome-fragment | 0.57 | 0 |
| S7-final-viral-combined_k141_219622  | [H2gene] | 1514  | No | NA | 1 | 0  | Low-quality    | Genome-fragment | 2.63 | 0 |
| S17-final-viral-combined_k141_184374 | [full]   | 1514  | No | NA | 0 | 0  | Low-quality    | Genome-fragment | 4.84 | 0 |
| S3-final-viral-combined_k141_126809  | [full]   | 1897  | No | NA | 0 | 1  | Not-determined | Genome-fragment | NA   | 0 |
| S3-final-viral-combined_k141_126812  | [full]   | 2105  | No | NA | 0 | 1  | Not-determined | Genome-fragment | NA   | 0 |
| S3-final-viral-combined_k141_34784   | [full]   | 1094  | No | NA | 0 | 2  | Not-determined | Genome-fragment | NA   | 0 |
| S3-final-viral-combined_k141_17459   | [full]   | 69116 | No | NA | 0 | 19 | Not-determined | Genome-fragment | NA   | 0 |
| S17_k141_130682                      |          | 1514  | No | NA | 1 | 0  | Low-quality    | Genome-fragment | 3.14 | 0 |
| S12-final-viral-combined_k141_220871 | [H2gene] | 1514  | No | NA | 0 | 0  | Low-quality    | Genome-fragment | 3.84 | 0 |
| S3-final-viral-combined_k141_11716   | [full]   | 1048  | No | NA | 0 | 0  | Not-determined | Genome-fragment | NA   | 0 |
| S3-final-viral-combined_k141_132594  | [full]   | 6099  | No | NA | 0 | 0  | Not-determined | Genome-fragment | NA   | 0 |
| S3-final-viral-combined_k141_406     | [full]   | 2819  | No | NA | 0 | 2  | Not-determined | Genome-fragment | NA   | 0 |
| S3-final-viral-combined_k141_17478   | [full]   | 3953  | No | NA | 0 | 0  | Not-determined | Genome-fragment | NA   | 0 |
| S3-final-viral-combined_k141_46355   | [full]   | 1168  | No | NA | 0 | 1  | Not-determined | Genome-fragment | NA   | 0 |
| S3-final-viral-combined_k141_57738   | [full]   | 1378  | No | NA | 0 | 1  | Not-determined | Genome-fragment | NA   | 0 |
| S3-final-viral-combined_k141_12088   | [full]   | 2109  | No | NA | 0 | 2  | Not-determined | Genome-fragment | NA   | 0 |
| S3-final-viral-combined_k141_40553   | [full]   | 5218  | No | NA | 0 | 3  | Not-determined | Genome-fragment | NA   | 0 |
| S3-final-viral-combined_k141_63590   | [full]   | 5660  | No | NA | 0 | 2  | Not-determined | Genome-fragment | NA   | 0 |
| S3-final-viral-combined_k141_40561   | [full]   | 1591  | No | NA | 0 | 1  | Not-determined | Genome-fragment | NA   | 0 |
| S2_k141_131725                       |          | 1514  | No | NA | 0 | 0  | Low-quality    | Genome-fragment | 2.16 | 0 |
| S3-final-viral-combined_k141_75035   | [full]   | 2580  | No | NA | 0 | 2  | Not-determined | Genome-fragment | NA   | 0 |
| S3-final-viral-combined_k141_26727   | [full]   | 1170  | No | NA | 0 | 1  | Not-determined | Genome-fragment | NA   | 0 |
| S8-final-viral-combined_k141_141912  | [full]   | 1514  | No | NA | 0 | 0  | Low-quality    | Genome-fragment | 1.85 | 0 |
| S3-final-viral-combined_k141_80797   | [full]   | 3146  | No | NA | 0 | 2  | Not-determined | Genome-fragment | NA   | 0 |
| S8-final-viral-combined_k141_259871  | [H2gene] | 1514  | No | NA | 2 | 0  | Low-quality    | Genome-fragment | 3.67 | 0 |
| S3-final-viral-combined_k141_126291  | [full]   | 1567  | No | NA | 0 | 1  | Not-determined | Genome-fragment | NA   | 0 |
| S3-final-viral-combined_k141_23437   | [full]   | 1026  | No | NA | 0 | 1  | Not-determined | Genome-fragment | NA   | 0 |
| S3-final-viral-combined_k141_69383   | [full]   | 1451  | No | NA | 0 | 3  | Not-determined | Genome-fragment | NA   | 0 |
| S11-final-viral-combined_k141_32724  | [full]   | 1515  | No | NA | 0 | 0  | Low-quality    | Genome-fragment | 2.45 | 0 |
| S3-final-viral-combined_k141_17572   | [full]   | 1412  | No | NA | 0 | 1  | Not-determined | Genome-fragment | NA   | 0 |
| S3-final-viral-combined_k141_98093   | [full]   | 2209  | No | NA | 0 | 1  | Not-determined | Genome-fragment | NA   | 0 |
| S3-final-viral-combined_k141_122708  | [full]   | 1692  | No | NA | 0 | 1  | Not-determined | Genome-fragment | NA   | 0 |
| S11-final-viral-combined_k141_300551 | [full]   | 1515  | No | NA | 2 | 0  | Low-quality    | Genome-fragment | 4.16 | 0 |
| S3-final-viral-combined_k141_481     | [full]   | 4745  | No | NA | 0 | 0  | Not-determined | Genome-fragment | NA   | 0 |
| S3-final-viral-combined_k141_75124   | [full]   | 2171  | No | NA | 0 | 1  | Not-determined | Genome-fragment | NA   | 0 |
| S3-final-viral-combined_k141_4901    | [full]   | 1780  | No | NA | 0 | 2  | Not-determined | Genome-fragment | NA   | 0 |
| S3-final-viral-combined_k141_80862   | [full]   | 3959  | No | NA | 0 | 2  | Not-determined | Genome-fragment | NA   | 0 |
| S3-final-viral-combined_k141_103787  | [full]   | 1515  | No | NA | 0 | 0  | Low-quality    | Genome-fragment | 3.17 | 0 |
| S3-final-viral-combined_k141_75127   | [full]   | 1080  | No | NA | 0 | 0  | Not-determined | Genome-fragment | NA   | 0 |
| S3-final-viral-combined_k141_36589   | [full]   | 1515  | No | NA | 1 | 0  | Low-quality    | Genome-fragment | 2.84 | 0 |
| S7-final-viral-combined_k141_63872   | [full]   | 1515  | No | NA | 1 | 0  | Low-quality    | Genome-fragment | 2.25 | 0 |
| S3-final-viral-combined_k141_6190    | [full]   | 1421  | No | NA | 0 | 1  | Not-determined | Genome-fragment | NA   | 0 |
| S3-final-viral-combined_k141_34970   | [full]   | 2720  | No | NA | 0 | 1  | Not-determined | Genome-fragment | NA   | 0 |
| S3-final-viral-combined_k141_89117   | [full]   | 2071  | No | NA | 0 | 1  | Not-determined | Genome-fragment | NA   | 0 |
| S17-final-viral-combined_k141_9312   | [full]   | 1515  | No | NA | 1 | 0  | Low-quality    | Genome-fragment | 2.22 | 0 |
| S12-final-viral-combined_k141_40393  | [full]   | 1515  | No | NA | 0 | 0  | Low-quality    | Genome-fragment | 3.83 | 0 |
| S6-final-viral-combined_k141_65092   | [full]   | 1515  | No | NA | 0 | 1  | Low-quality    | Genome-fragment | 1.9  | 0 |
| S3-final-viral-combined_k141_40657   | [full]   | 2119  | No | NA | 0 | 2  | Not-determined | Genome-fragment | NA   | 0 |
| S3-final-viral-combined_k141_77849   | [full]   | 1166  | No | NA | 0 | 2  | Not-determined | Genome-fragment | NA   | 0 |
| S8-final-viral-combined_k141_44070   | [full]   | 1515  | No | NA | 1 | 0  | Low-quality    | Genome-fragment | 2.77 | 0 |
| S1-final-viral-combined_k141_350822  | [H2gene] | 1516  | No | NA | 1 | 0  | Low-quality    | Genome-fragment | 3.41 | 0 |
| S3-final-viral-combined_k141_69470   | [full]   | 1671  | No | NA | 0 | 0  | Not-determined | Genome-fragment | NA   | 0 |
| S1-final-viral-combined_k141_289072  | [H2gene] | 1516  | No | NA | 1 | 0  | Low-quality    | Genome-fragment | 2.22 | 0 |
| S1_k141_381386                       |          | 1516  | No | NA | 0 | 1  | Low-quality    | Genome-fragment | 1.63 | 0 |
| S3-final-viral-combined_k141_68040   | [full]   | 1516  | No | NA | 0 | 0  | Low-quality    | Genome-fragment | 2.54 | 0 |
| S3-final-viral-combined_k141_132783  | [full]   | 1472  | No | NA | 0 | 0  | Not-determined | Genome-fragment | NA   | 0 |
| S3-final-viral-combined_k141_6239    | [full]   | 2244  | No | NA | 0 | 2  | Not-determined | Genome-fragment | NA   | 0 |
| S3-final-viral-combined_k141_32473   | [full]   | 2244  | No | NA | 0 | 2  | Not-determined | Genome-fragment | NA   | 0 |
| S3-final-viral-combined_k141_11880   | [full]   | 4714  | No | NA | 0 | 0  | Not-determined | Genome-fragment | NA   | 0 |
| S3-final-viral-combined_k141_11897   | [full]   | 2622  | No | NA | 0 | 1  | Not-determined | Genome-fragment | NA   | 0 |
| S3-final-viral-combined_k141_11904   | [full]   | 1531  | No | NA | 0 | 1  | Not-determined | Genome-fragment | NA   | 0 |
| S3-final-viral-combined_k141_6371    | [full]   | 3819  | No | NA | 0 | 2  | Not-determined | Genome-fragment | NA   | 0 |
| S3-final-viral-combined_k141_75205   | [full]   | 1219  | No | NA | 0 | 0  | Not-determined | Genome-fragment | NA   | 0 |
| S7-final-viral-combined_k141_199330  | [full]   | 1516  | No | NA | 0 | 1  | Low-quality    | Genome-fragment | 0.62 | 0 |
| S3-final-viral-combined_k141_6278    | [full]   | 2385  | No | NA | 0 | 3  | Not-determined | Genome-fragment | NA   | 0 |
| S3-final-viral-combined_k141_35059   | [full]   | 11579 | No | NA | 0 | 0  | Not-determined | Genome-fragment | NA   | 0 |
| S3-final-viral-combined_k141_86910   | [full]   | 3479  | No | NA | 0 | 2  | Not-determined | Genome-fragment | NA   | 0 |
| S7-final-viral-combined_k141_230422  | [H2gene] | 1516  | No | NA | 0 | 0  | Low-quality    | Genome-fragment | 1.67 | 0 |
| S3-final-viral-combined_k141_86913   | [full]   | 3569  | No | NA | 0 | 2  | Not-determined | Genome-fragment | NA   | 0 |
| S3-final-viral-combined_k141_23593   | [full]   | 2803  | No | NA | 0 | 3  | Not-determined | Genome-fragment | NA   | 0 |
| S3-final-viral-combined_k141_23594   | [full]   | 1950  | No | NA | 0 | 1  | Not-determined | Genome-fragment | NA   | 0 |
| S3-final-viral-combined_k141_38216   | [full]   | 7119  | No | NA | 0 | 4  | Not-determined | Genome-fragment | NA   | 0 |
| S3-final-viral-combined_k141_46638   | [full]   | 2479  | No | NA | 0 | 1  | Not-determined | Genome-fragment | NA   | 0 |
| S3-final-viral-combined_k141_115597  | [full]   | 5103  | No | NA | 0 | 5  | Not-determined | Genome-fragment | NA   | 0 |
| S3-final-viral-combined_k141_6381    | [full]   | 3227  | No | NA | 0 | 1  | Not-determined | Genome-fragment | NA   | 0 |
| S3-final-viral-combined_k141_75264   | [full]   | 8092  | No | NA | 0 | 1  | Not-determined | Genome-fragment | NA   | 0 |
| S17-final-viral-combined_k141_2849   | [full]   | 1516  | No | NA | 1 | 0  | Low-quality    | Genome-fragment | 2.4  | 0 |
| S12-final-viral-combined_k141_154699 | [full]   | 1516  | No | NA | 0 | 0  | Low-quality    | Genome-fragment |      |   |



|                                      |          |      |     |      |   |   |                |                 |    |       |       |
|--------------------------------------|----------|------|-----|------|---|---|----------------|-----------------|----|-------|-------|
| S3-final-viral-combined_k141_104247  | [full]   | 2091 | No  | NA   | 0 | 0 | Not-determined | Genome-fragment | NA | 0.48  | 0     |
| S11-final-viral-combined_k141_22591  | [full]   | 1518 | No  | NA   | 0 | 0 | Low-quality    | Genome-fragment | NA | 2.2   | 0     |
| S1-final-viral-combined_k141_169446  | [H2gene] | 1518 | No  | NA   | 1 | 0 | Low-quality    | Genome-fragment | NA | 2.77  | 0     |
| S5-final-viral-combined_k141_63723   | [full]   | 1518 | No  | NA   | 0 | 3 | Not-determined | Genome-fragment | NA | 0     | 0     |
| S3-final-viral-combined_k141_829     | [full]   | 4321 | No  | NA   | 0 | 1 | Not-determined | Genome-fragment | NA | 0     | 0     |
| S3-final-viral-combined_k141_29438   | [full]   | 3026 | No  | NA   | 0 | 2 | Not-determined | Genome-fragment | NA | 2.58  | 0     |
| S3-final-viral-combined_k141_18003   | [full]   | 1527 | No  | NA   | 0 | 1 | Low-quality    | Genome-fragment | NA | 0     | 15.22 |
| S7-final-viral-combined_k141_48771   | [full]   | 1518 | Yes | 1287 | 1 | 1 | Low-quality    | Genome-fragment | NA | 0     | 0     |
| S3-final-viral-combined_k141_127461  | [full]   | 2111 | No  | NA   | 1 | 0 | Not-determined | Genome-fragment | NA | 2.91  | 0     |
| S12-final-viral-combined_k141_128269 | [full]   | 1518 | No  | NA   | 0 | 1 | Not-determined | Genome-fragment | NA | 0     | 0     |
| S3-final-viral-combined_k141_46886   | [full]   | 2904 | No  | NA   | 0 | 1 | Not-determined | Genome-fragment | NA | 0     | 0     |
| S3-final-viral-combined_k141_54036   | [full]   | 1864 | No  | NA   | 0 | 3 | Not-determined | Genome-fragment | NA | 0     | 0     |
| S3-final-viral-combined_k141_110095  | [full]   | 3544 | No  | NA   | 0 | 2 | Not-determined | Genome-fragment | NA | 0     | 0     |
| S3-final-viral-combined_k141_81366   | [full]   | 1844 | No  | NA   | 0 | 1 | Not-determined | Genome-fragment | NA | 0     | 0     |
| S3-final-viral-combined_k141_988     | [full]   | 3872 | No  | NA   | 0 | 4 | Not-determined | Genome-fragment | NA | 0     | 0     |
| S3-final-viral-combined_k141_2500    | [full]   | 4462 | No  | NA   | 0 | 3 | Not-determined | Genome-fragment | NA | 1.39  | 0     |
| S12_k141_89498                       |          | 1518 | No  | NA   | 0 | 0 | Low-quality    | Genome-fragment | NA | 0     | 0     |
| S3-final-viral-combined_k141_18042   | [full]   | 1837 | No  | NA   | 0 | 0 | Not-determined | Genome-fragment | NA | 0.61  | 0     |
| S12_k141_208865                      |          | 1518 | No  | NA   | 0 | 1 | Low-quality    | Genome-fragment | NA | 2.29  | 0     |
| S2-final-viral-combined_k141_214434  | [full]   | 1518 | No  | NA   | 2 | 0 | Low-quality    | Genome-fragment | NA | 3.25  | 0     |
| S2_k141_16560                        |          | 2308 | No  | NA   | 0 | 2 | Not-determined | Genome-fragment | NA | 0     | 0     |
| S3-final-viral-combined_k141_133131  | [full]   | 2223 | No  | NA   | 0 | 2 | Not-determined | Genome-fragment | NA | 0.98  | 0     |
| S3-final-viral-combined_k141_127507  | [full]   | 1519 | No  | NA   | 0 | 2 | Low-quality    | Genome-fragment | NA | 0     | 0     |
| S11-final-viral-combined_k141_1294   | [full]   | 1720 | No  | NA   | 0 | 2 | Not-determined | Genome-fragment | NA | 1.71  | 0     |
| S3-final-viral-combined_k141_81435   | [full]   | 4263 | No  | NA   | 0 | 2 | Not-determined | Genome-fragment | NA | 1.81  | 0     |
| S3-final-viral-combined_k141_121555  | [full]   | 2596 | No  | NA   | 0 | 2 | Not-determined | Genome-fragment | NA | 0     | 0     |
| S3-final-viral-combined_k141_64120   | [full]   | 1519 | No  | NA   | 1 | 0 | Low-quality    | Genome-fragment | NA | 0     | 0     |
| S11-final-viral-combined_k141_169660 | [full]   | 1519 | No  | NA   | 0 | 1 | Low-quality    | Genome-fragment | NA | 2.8   | 0     |
| S11-final-viral-combined_k141_40503  | [full]   | 1920 | No  | NA   | 0 | 1 | Not-determined | Genome-fragment | NA | 3.17  | 0     |
| S3-final-viral-combined_k141_81464   | [full]   | 1519 | No  | NA   | 1 | 0 | Low-quality    | Genome-fragment | NA | 0     | 0     |
| S11-final-viral-combined_k141_71412  | [H2gene] | 1519 | No  | NA   | 0 | 1 | Low-quality    | Genome-fragment | NA | 2.17  | 0     |
| S1_k141_335056                       |          | 1519 | No  | NA   | 0 | 1 | Not-determined | Genome-fragment | NA | 2.82  | 0     |
| S3-final-viral-combined_k141_35405   | [full]   | 2080 | No  | NA   | 0 | 3 | Not-determined | Genome-fragment | NA | 0.87  | 0     |
| S3-final-viral-combined_k141_5666    | [full]   | 1519 | No  | NA   | 0 | 0 | Low-quality    | Genome-fragment | NA | 0     | 0     |
| S3-final-viral-combined_k141_58471   | [full]   | 1517 | No  | NA   | 0 | 4 | Not-determined | Genome-fragment | NA | 0     | 0     |
| S5-final-viral-combined_k141_125151  | [full]   | 1519 | No  | NA   | 0 | 2 | Not-determined | Genome-fragment | NA | 0     | 0     |
| S3-final-viral-combined_k141_75632   | [full]   | 6240 | No  | NA   | 0 | 4 | Not-determined | Genome-fragment | NA | 0     | 0     |
| S3-final-viral-combined_k141_99881   | [full]   | 3591 | No  | NA   | 0 | 2 | Not-determined | Genome-fragment | NA | 0     | 0     |
| S5-final-viral-combined_k141_156565  | [H2gene] | 1519 | No  | NA   | 0 | 1 | Low-quality    | Genome-fragment | NA | 3.71  | 0     |
| S3-final-viral-combined_k141_87399   | [full]   | 1348 | No  | NA   | 2 | 1 | Not-determined | Genome-fragment | NA | 0     | 0     |
| S17-final-viral-combined_k141_198760 | [H2gene] | 1519 | No  | NA   | 1 | 0 | Low-quality    | Genome-fragment | NA | 3.81  | 0     |
| S3-final-viral-combined_k141_127610  | [full]   | 1442 | No  | NA   | 0 | 2 | Not-determined | Genome-fragment | NA | 0     | 0     |
| S3-final-viral-combined_k141_69906   | [full]   | 2877 | No  | NA   | 0 | 3 | Not-determined | Genome-fragment | NA | 0     | 0     |
| S3-final-viral-combined_k141_58458   | [full]   | 4006 | No  | NA   | 0 | 3 | Not-determined | Genome-fragment | NA | 0     | 0     |
| S3-final-viral-combined_k141_115514  | [full]   | 1187 | No  | NA   | 0 | 1 | Not-determined | Genome-fragment | NA | 0     | 0     |
| S3-final-viral-combined_k141_18073   | [full]   | 3790 | No  | NA   | 0 | 2 | Not-determined | Genome-fragment | NA | 0     | 0     |
| S3-final-viral-combined_k141_75687   | [full]   | 1165 | No  | NA   | 0 | 0 | Not-determined | Genome-fragment | NA | 0     | 0     |
| S3-final-viral-combined_k141_5776    | [full]   | 6530 | No  | NA   | 0 | 3 | Not-determined | Genome-fragment | NA | 2.21  | 0     |
| S12-final-viral-combined_k141_185485 | [full]   | 1519 | No  | NA   | 0 | 1 | Low-quality    | Genome-fragment | NA | 1.51  | 0     |
| S3-final-viral-combined_k141_25625   | [full]   | 1601 | No  | NA   | 0 | 0 | Not-determined | Genome-fragment | NA | 0     | 0     |
| S4-final-viral-combined_k141_22642   | [H2gene] | 1519 | No  | NA   | 0 | 0 | Low-quality    | Genome-fragment | NA | 0     | 0     |
| S3-final-viral-combined_k141_132361  | [full]   | 2127 | No  | NA   | 0 | 2 | Not-determined | Genome-fragment | NA | 0     | 0     |
| S3-final-viral-combined_k141_127636  | [full]   | 1728 | No  | NA   | 0 | 0 | Not-determined | Genome-fragment | NA | 0     | 0     |
| S3-final-viral-combined_k141_35483   | [full]   | 2174 | No  | NA   | 0 | 1 | Not-determined | Genome-fragment | NA | 0     | 0     |
| S3-final-viral-combined_k141_38544   | [full]   | 3879 | No  | NA   | 0 | 1 | Low-quality    | Genome-fragment | NA | 0.71  | 0     |
| S9-final-viral-combined_k141_5895    | [full]   | 1520 | No  | NA   | 0 | 1 | Not-determined | Genome-fragment | NA | 1.42  | 0     |
| S3-final-viral-combined_k141_75741   | [full]   | 2810 | No  | NA   | 0 | 1 | Low-quality    | Genome-fragment | NA | 0     | 0     |
| S3-final-viral-combined_k141_213396  | [full]   | 1520 | No  | NA   | 0 | 1 | Low-quality    | Genome-fragment | NA | 0     | 0     |
| S3-final-viral-combined_k141_64283   | [full]   | 3210 | No  | NA   | 0 | 1 | Not-determined | Genome-fragment | NA | 2.22  | 0     |
| S3-final-viral-combined_k141_75749   | [full]   | 2690 | No  | NA   | 1 | 0 | Low-quality    | Genome-fragment | NA | 0     | 0     |
| S3-final-viral-combined_k141_205388  | [H2gene] | 1520 | No  | NA   | 0 | 1 | Not-determined | Genome-fragment | NA | 0     | 0     |
| S3-final-viral-combined_k141_87519   | [full]   | 1895 | No  | NA   | 0 | 1 | Not-determined | Genome-fragment | NA | 1.23  | 0     |
| S3-final-viral-combined_k141_98621   | [full]   | 2073 | No  | NA   | 0 | 0 | Low-quality    | Genome-fragment | NA | 0     | 0     |
| S7-final-viral-combined_k141_106347  | [full]   | 1520 | No  | NA   | 0 | 3 | Not-determined | Genome-fragment | NA | 1.07  | 0     |
| S3-final-viral-combined_k141_64343   | [full]   | 3862 | No  | NA   | 0 | 1 | Low-quality    | Genome-fragment | NA | 0     | 0     |
| S3-final-viral-combined_k141_6871    | [full]   | 2156 | No  | NA   | 0 | 5 | Not-determined | Genome-fragment | NA | 2.07  | 0     |
| S7_k141_131880                       |          | 1520 | No  | NA   | 0 | 1 | Low-quality    | Genome-fragment | NA | 0     | 0     |
| S3-final-viral-combined_k141_70027   | [full]   | 1657 | No  | NA   | 0 | 1 | Not-determined | Genome-fragment | NA | 0     | 0     |
| S3-final-viral-combined_k141_18197   | [full]   | 1827 | No  | NA   | 0 | 5 | Not-determined | Genome-fragment | NA | 2.07  | 0     |
| S3-final-viral-combined_k141_58583   | [full]   | 6487 | No  | NA   | 0 | 0 | Low-quality    | Genome-fragment | NA | 0.44  | 0     |
| S12_k141_390299                      |          | 1520 | No  | NA   | 1 | 0 | Low-quality    | Genome-fragment | NA | 2.96  | 0     |
| S8-final-viral-combined_k141_219637  | [full]   | 1520 | No  | NA   | 0 | 0 | Low-quality    | Genome-fragment | NA | 2.87  | 0     |
| S1-final-viral-combined_k141_242169  | [full]   | 1521 | No  | NA   | 0 | 2 | Not-determined | Genome-fragment | NA | 1.58  | 0     |
| S3-final-viral-combined_k141_24087   | [full]   | 2006 | No  | NA   | 0 | 1 | Low-quality    | Genome-fragment | NA | 4.53  | 0     |
| S1-final-viral-combined_k141_76974   | [full]   | 1521 | No  | NA   | 2 | 0 | Low-quality    | Genome-fragment | NA | 0     | 0     |
| S2-final-viral-combined_k141_35871   | [full]   | 1521 | No  | NA   | 0 | 0 | Not-determined | Genome-fragment | NA | 1.16  | 0     |
| S3-final-viral-combined_k141_6925    | [full]   | 1014 | No  | NA   | 0 | 0 | Low-quality    | Genome-fragment | NA | 3.7   | 0     |
| S4-final-viral-combined_k141_142156  | [full]   | 1521 | No  | NA   | 0 | 2 | Not-determined | Genome-fragment | NA | 0     | 0     |
| S8-final-viral-combined_k141_123556  | [full]   | 1521 | No  | NA   | 0 | 2 | Not-determined | Genome-fragment | NA | 0     | 0     |
| S3-final-viral-combined_k141_12421   | [full]   | 1284 | No  | NA   | 0 | 1 | Low-quality    | Genome-fragment | NA | 0     | 0     |
| S3-final-viral-combined_k141_133422  | [full]   | 1883 | No  | NA   | 0 | 0 | Not-determined | Genome-fragment | NA | 0     | 0     |
| S3-final-viral-combined_k141_133420  | [full]   | 2244 | No  | NA   | 0 | 0 | Not-determined | Genome-fragment | NA | 0     | 0     |
| S3-final-viral-combined_k141_70091   | [full]   | 1364 | No  | NA   | 0 | 3 | Low-quality    | Genome-fragment | NA | 0.44  | 0     |
| S1_k141_106984                       |          | 1522 | No  | NA   | 0 | 0 | Low-quality    | Genome-fragment | NA | 2.96  | 0     |
| S5-final-viral-combined_k141_204451  | [full]   | 1522 | No  | NA   | 1 | 0 | Low-quality    | Genome-fragment | NA | 0     | 0     |
| S3-final-viral-combined_k141_133455  | [full]   | 1183 | No  | NA   | 0 | 1 | Not-determined | Genome-fragment | NA | 0     | 0     |
| S3-final-viral-combined_k141_12479   | [full]   | 2291 | No  | NA   | 0 | 0 | Not-determined | Genome-fragment | NA | 0     | 0     |
| S3-final-viral-combined_k141_110452  | [full]   | 1349 | No  | NA   | 0 | 2 | Not-determined | Genome-fragment | NA | 0     | 0     |
| S3-final-viral-combined_k141_70129   | [full]   | 1340 | No  | NA   | 0 | 0 | Low-quality    | Genome-fragment | NA | 3.97  | 0     |
| S7-final-viral-combined_k141_35193   | [full]   | 1522 | No  | NA   | 0 | 2 | Not-determined | Genome-fragment | NA | 1.04  | 0     |
| S3-final-viral-combined_k141_24191   | [full]   | 1793 | No  | NA   | 0 | 0 | Low-quality    | Genome-fragment | NA | 3.57  | 0     |
| S3-final-viral-combined_k141_58609   | [full]   | 2809 | No  | NA   | 0 | 3 | Not-determined | Genome-fragment | NA | 3.54  | 0     |
| S7_k141_157717                       |          | 1522 | No  | NA   | 1 | 0 | Low-quality    | Genome-fragment | NA | 2.63  | 0     |
| S17-final-viral-combined_k141_12785  | [full]   | 1522 | No  | NA   | 0 | 1 | Not-determined | Genome-fragment | NA | 1.83  | 0     |
| S17-final-viral-combined_k141_59855  | [full]   | 1522 | No  | NA   | 0 | 0 | Low-quality    | Genome-fragment | NA | 34.04 | 0     |
| S7-final-viral-combined_k141_249006  | [full]   | 1522 | No  | NA   | 0 | 0 | Low-quality    | Genome-fragment | NA | 2.29  | 0     |
| S3-final-viral-combined_k141_127894  | [full]   | 2040 | No  | NA   | 0 | 1 | Not-determined | Genome-fragment | NA | 2.45  | 0     |
| S2-final-viral-combined_k141_35397   | [full]   | 1522 | No  | NA   | 0 | 0 | Low-quality    | Genome-fragment | NA | 0.64  | 0     |
| S3-final-viral-combined_k141_41460   | [full]   | 1068 | No  | NA   | 0 | 1 | Not-determined | Genome-fragment | NA | 4.12  | 0     |
| S4-final-viral-combined_k141_110128  | [H2gene] | 1522 | No  | NA   | 1 | 0 | Low-quality    | Genome-fragment | NA | 2.91  | 0     |
| S4_k141_59811                        |          | 1522 | No  | NA   | 0 | 0 | Low-quality    | Genome-fragment | NA | 0     | 0     |
| S3-final-viral-combined_k141_127917  | [full]   | 2815 | No  | NA   | 0 | 0 | Not-determined | Genome-fragment | NA | 0     | 0     |
| S8_k141_235880                       |          | 1522 | No  | NA   | 0 | 0 | Low-quality    | Genome-fragment | NA | 0.4   | 0     |
| S9-final-viral-combined_k141_112112  | [full]   | 1523 | No  | NA   | 1 | 0 | Low-quality    | Genome-fragment | NA | 0     | 0     |
| S1-final-viral-combined_k141_48813   | [full]   | 1523 | No  | NA   | 0 | 0 | Low-quality    | Genome-fragment | NA | 0     | 0     |
| S3-final-viral-combined_k141_93190   | [full]   | 1774 | No  | NA   | 0 | 0 | Not-determined | Genome-fragment | NA | 2.21  | 0     |
| S3_k141_116812                       |          | 1523 | No  | NA   | 0 | 0 | Low-quality    | Genome-fragment | NA | 0     | 0     |
| S3-final-viral-combined_k141_87700   | [full]   | 1015 | No  | NA   | 0 | 1 | Not-determined | Genome-fragment | NA | 3.07  | 0     |
| S5-final-viral-combined_k141_21311   | [full]   | 1523 | No  | NA   | 0 | 2 | Not-determined | Genome-fragment | NA | 3.1   | 0     |
| S3-final-viral-combined_k141_133564  | [full]   | 4133 | No  | NA   | 0 | 1 | Low-quality    | Genome-fragment | NA | 2.45  | 0     |
| S3-final-viral-combined_k141_130314  | [full]   | 1523 | No  | NA   | 0 | 0 | Low-quality    | Genome-fragment | NA | 0     | 0     |
| S5-final-viral-combined_k141_38048   | [H2gene] | 1523 | No  | NA   | 0 | 0 | Low-quality    | Genome-fragment | NA | 0     | 0     |
| S12-final-viral-combined_k141_168601 | [full]   | 1523 | No  | NA   | 0 | 0 | Low-quality    | Genome-fragment | NA | 0.98  | 0     |
| S3-final-viral-combined_k141_76025   | [full]   | 2750 | No  | NA   | 0 | 1 | Not-determined | Genome-fragment | NA | 3.94  | 0     |
| S3-final-viral-combined_k141_104066  | [full]   | 2206 | No  | NA   | 0 | 0 | Low-quality    | Genome-fragment | NA | 0     | 0     |
| S12-final-viral-combined_k141_315281 | [full]   | 1523 | No  | NA   | 0 | 0 | Low-quality    | Genome-fragment | NA | 2.92  | 0     |
| S3-final-viral-combined_k141_93232   | [full]   | 2177 | No  | NA   | 0 | 1 | Not-determined | Genome-fragment | NA | 1.05  | 0     |
| S12-final-viral-combined_k141_265531 | [full]   | 1523 | No  | NA   | 0 | 0 | Low-quality    | Genome-fragment | NA | 0.97  | 0     |
| S3-final-viral-combined_k141_58551   | [full]   | 1897 | No  | NA   | 0 | 0 | Not-determined | Genome-fragment | NA | 0     | 0     |
| S2-final-viral-combined_k141_106609  | [full]   | 1523 | No  | NA   | 0 | 1 | Low-quality    | Genome-fragment | NA | 0     | 0     |
| S2_k141_206297                       |          | 1523 | No  | NA   | 0 | 1 | Low-quality    | Genome-fragment | NA | 0     | 0     |
| S3-final-viral-combined_k141_76067   | [full]   | 2263 | No  | NA   | 0 | 2 | Not-determined | Genome-fragment | NA | 0     | 0     |
| S8-final-viral-combined_k141_244965  | [full]   | 1523 | No  | NA   |   |   |                |                 |    |       |       |



|                                      |          |       |     |     |   |   |                |                 |    |      |       |
|--------------------------------------|----------|-------|-----|-----|---|---|----------------|-----------------|----|------|-------|
| S3-final-viral-combined_k141_705988  | [full]   | 1315  | No  | NA  | 0 | 0 | Not-determined | Genome-fragment | NA | 0    | 0     |
| S3-final-viral-combined_k141_18761   | [full]   | 2163  | No  | NA  | 0 | 0 | Not-determined | Genome-fragment | NA | 0    | 0     |
| S8-final-viral-combined_k141_164065  | [full]   | 1526  | No  | NA  | 1 | 0 | Low-quality    | Genome-fragment | NA | 2.79 | 0     |
| S3-final-viral-combined_k141_418277  | [full]   | 1091  | No  | NA  | 0 | 0 | Not-determined | Genome-fragment | NA | 0    | 0     |
| S3-final-viral-combined_k141_122301  | [full]   | 1401  | No  | NA  | 0 | 1 | Not-determined | Genome-fragment | NA | 0    | 0     |
| S3-final-viral-combined_k141_18781   | [full]   | 2294  | No  | NA  | 0 | 0 | Not-determined | Genome-fragment | NA | 0    | 0     |
| S1-final-viral-combined_k141_354537  | [full]   | 1527  | No  | NA  | 2 | 0 | Low-quality    | Genome-fragment | NA | 1.03 | 0     |
| S1-final-viral-combined_k141_305958  | [full]   | 1527  | No  | NA  | 0 | 0 | Low-quality    | Genome-fragment | NA | 3.14 | 0     |
| S5-final-viral-combined_k141_132134  | [full]   | 1527  | No  | NA  | 0 | 0 | Low-quality    | Genome-fragment | NA | 2.68 | 0     |
| S3-final-viral-combined_k141_591575  | [full]   | 1460  | No  | NA  | 0 | 1 | Not-determined | Genome-fragment | NA | 0    | 0     |
| S5_k141_80490                        |          | 1527  | No  | NA  | 0 | 1 | Low-quality    | Genome-fragment | NA | 0.84 | 0     |
| S3-final-viral-combined_k141_18793   | [full]   | 2338  | No  | NA  | 0 | 2 | Not-determined | Genome-fragment | NA | 0    | 0     |
| S2-final-viral-combined_k141_68175   | [full]   | 1527  | No  | NA  | 0 | 1 | Low-quality    | Genome-fragment | NA | 5.07 | 0     |
| S3-final-viral-combined_k141_128406  | [full]   | 1586  | No  | NA  | 0 | 1 | Not-determined | Genome-fragment | NA | 0    | 0     |
| S2-final-viral-combined_k141_23258   | [full]   | 1527  | No  | NA  | 0 | 0 | Low-quality    | Genome-fragment | NA | 2.1  | 0     |
| S3-final-viral-combined_k141_47807   | [full]   | 3895  | No  | NA  | 0 | 0 | Not-determined | Genome-fragment | NA | 0    | 0     |
| S3-final-viral-combined_k141_105176  | [full]   | 3969  | No  | NA  | 0 | 4 | Not-determined | Genome-fragment | NA | 0    | 0     |
| S3-final-viral-combined_k141_7405    | [full]   | 1075  | No  | NA  | 0 | 0 | Not-determined | Genome-fragment | NA | 0    | 0     |
| S3-final-viral-combined_k141_110579  | [full]   | 1151  | No  | NA  | 0 | 1 | Not-determined | Genome-fragment | NA | 0    | 0     |
| S8-final-viral-combined_k141_239658  | [full]   | 1527  | No  | NA  | 0 | 0 | Low-quality    | Genome-fragment | NA | 2.83 | 0     |
| S3-final-viral-combined_k141_18862   | [full]   | 2936  | No  | NA  | 0 | 2 | Not-determined | Genome-fragment | NA | 0    | 0     |
| S3-final-viral-combined_k141_24705   | [full]   | 1124  | No  | NA  | 0 | 1 | Not-determined | Genome-fragment | NA | 0    | 0     |
| S11-final-viral-combined_k141_101291 | [full]   | 1528  | No  | NA  | 1 | 0 | Low-quality    | Genome-fragment | NA | 2.73 | 0     |
| S3-final-viral-combined_k141_122448  | [full]   | 1109  | No  | NA  | 0 | 1 | Not-determined | Genome-fragment | NA | 0    | 0     |
| S3-final-viral-combined_k141_300369  | [full]   | 1528  | No  | NA  | 0 | 1 | Low-quality    | Genome-fragment | NA | 3.13 | 0     |
| S3-final-viral-combined_k141_47840   | [full]   | 2753  | No  | NA  | 0 | 0 | Not-determined | Genome-fragment | NA | 0    | 0     |
| S1-final-viral-combined_k141_304778  | [full]   | 1528  | No  | NA  | 0 | 0 | Low-quality    | Genome-fragment | NA | 1.2  | 0     |
| S3-final-viral-combined_k141_18883   | [full]   | 4133  | No  | NA  | 0 | 4 | Not-determined | Genome-fragment | NA | 0    | 0     |
| S3-final-viral-combined_k141_93339   | [full]   | 1528  | No  | NA  | 0 | 2 | Low-quality    | Genome-fragment | NA | 1.13 | 0     |
| S3_k141_64566                        |          | 1528  | No  | NA  | 0 | 0 | Low-quality    | Genome-fragment | NA | 0.24 | 0     |
| S3-final-viral-combined_k141_111048  | [full]   | 3340  | No  | NA  | 0 | 0 | Not-determined | Genome-fragment | NA | 0    | 0     |
| S3-final-viral-combined_k141_99238   | [full]   | 1620  | No  | NA  | 0 | 1 | Not-determined | Genome-fragment | NA | 0    | 0     |
| S5-final-viral-combined_k141_27827   | [full]   | 1528  | No  | NA  | 0 | 0 | Low-quality    | Genome-fragment | NA | 2.82 | 0     |
| S3-final-viral-combined_k141_18936   | [full]   | 6696  | No  | NA  | 0 | 1 | Not-determined | Genome-fragment | NA | 0    | 0     |
| S7-final-viral-combined_k141_103023  | [full]   | 1528  | No  | NA  | 2 | 0 | Low-quality    | Genome-fragment | NA | 3.53 | 0     |
| S3-final-viral-combined_k141_70786   | [full]   | 1810  | No  | NA  | 0 | 2 | Not-determined | Genome-fragment | NA | 0    | 0     |
| S7_k141_192064                       |          | 1528  | Yes | 695 | 1 | 1 | Low-quality    | Genome-fragment | NA | 0.06 | 54.52 |
| S12-final-viral-combined_k141_16923  | [full]   | 1528  | No  | NA  | 2 | 0 | Low-quality    | Genome-fragment | NA | 3.94 | 0     |
| S3-final-viral-combined_k141_65118   | [full]   | 1890  | No  | NA  | 2 | 2 | Not-determined | Genome-fragment | NA | 0    | 0     |
| S9-final-viral-combined_k141_58878   | [full]   | 2451  | No  | NA  | 0 | 1 | Not-determined | Genome-fragment | NA | 3.17 | 0     |
| S9-final-viral-combined_k141_10562   | [full]   | 1529  | No  | NA  | 0 | 2 | Low-quality    | Genome-fragment | NA | 0.68 | 0     |
| S11-final-viral-combined_k141_68243  | [full]   | 1529  | No  | NA  | 0 | 1 | Low-quality    | Genome-fragment | NA | 1.34 | 0     |
| S3-final-viral-combined_k141_13172   | [full]   | 1261  | No  | NA  | 0 | 1 | Not-determined | Genome-fragment | NA | 0    | 0     |
| S11-final-viral-combined_k141_137502 | [full]   | 1529  | No  | NA  | 1 | 0 | Low-quality    | Genome-fragment | NA | 3.01 | 0     |
| S11-final-viral-combined_k141_66110  | [R2gene] | 1529  | No  | NA  | 0 | 1 | Low-quality    | Genome-fragment | NA | 3.45 | 0     |
| S3-final-viral-combined_k141_124006  | [full]   | 1529  | No  | NA  | 0 | 1 | Low-quality    | Genome-fragment | NA | 0.8  | 0     |
| S7-final-viral-combined_k141_115459  | [full]   | 1529  | No  | NA  | 0 | 0 | Low-quality    | Genome-fragment | NA | 1.93 | 0     |
| S3-final-viral-combined_k141_42088   | [full]   | 2057  | No  | NA  | 0 | 0 | Not-determined | Genome-fragment | NA | 0    | 0     |
| S17-final-viral-combined_k141_42886  | [full]   | 1529  | No  | NA  | 0 | 0 | Low-quality    | Genome-fragment | NA | 2.45 | 0     |
| S12-final-viral-combined_k141_127    | [full]   | 1529  | No  | NA  | 0 | 0 | Low-quality    | Genome-fragment | NA | 2.88 | 0     |
| S12-final-viral-combined_k141_181895 | [full]   | 1529  | No  | NA  | 0 | 1 | Low-quality    | Genome-fragment | NA | 0.73 | 0     |
| S3-final-viral-combined_k141_30471   | [full]   | 2255  | No  | NA  | 0 | 1 | Not-determined | Genome-fragment | NA | 0    | 0     |
| S12_k141_194046                      |          | 1529  | No  | NA  | 0 | 0 | Low-quality    | Genome-fragment | NA | 0.89 | 0     |
| S3-final-viral-combined_k141_59390   | [full]   | 1766  | No  | NA  | 0 | 0 | Not-determined | Genome-fragment | NA | 0    | 0     |
| S3-final-viral-combined_k141_88258   | [full]   | 3669  | No  | NA  | 0 | 2 | Not-determined | Genome-fragment | NA | 0    | 0     |
| S3-final-viral-combined_k141_1943    | [full]   | 1799  | No  | NA  | 0 | 0 | Not-determined | Genome-fragment | NA | 0    | 0     |
| S11-final-viral-combined_k141_70133  | [full]   | 1530  | No  | NA  | 1 | 0 | Low-quality    | Genome-fragment | NA | 1.15 | 0     |
| S3-final-viral-combined_k141_70897   | [full]   | 1445  | No  | NA  | 0 | 0 | Not-determined | Genome-fragment | NA | 0    | 0     |
| S3-final-viral-combined_k141_53639   | [full]   | 1517  | No  | NA  | 0 | 1 | Not-determined | Genome-fragment | NA | 0    | 0     |
| S11_k141_124652                      |          | 1530  | No  | NA  | 1 | 0 | Low-quality    | Genome-fragment | NA | 1.66 | 0     |
| S3-final-viral-combined_k141_59422   | [full]   | 1584  | No  | NA  | 0 | 0 | Not-determined | Genome-fragment | NA | 0    | 0     |
| S3-final-viral-combined_k141_122660  | [full]   | 3130  | No  | NA  | 0 | 2 | Not-determined | Genome-fragment | NA | 0    | 0     |
| S3-final-viral-combined_k141_13278   | [full]   | 1518  | No  | NA  | 0 | 2 | Not-determined | Genome-fragment | NA | 0    | 0     |
| S3-final-viral-combined_k141_53660   | [full]   | 2379  | No  | NA  | 0 | 1 | Not-determined | Genome-fragment | NA | 0    | 0     |
| S7-final-viral-combined_k141_153151  | [full]   | 1530  | No  | NA  | 0 | 1 | Low-quality    | Genome-fragment | NA | 2.75 | 0     |
| S7_k141_61615                        |          | 1530  | No  | NA  | 0 | 1 | Low-quality    | Genome-fragment | NA | 2.54 | 0     |
| S3-final-viral-combined_k141_105446  | [full]   | 2039  | No  | NA  | 0 | 2 | Not-determined | Genome-fragment | NA | 3.05 | 0     |
| S17-final-viral-combined_k141_20422  | [R2gene] | 1530  | No  | NA  | 0 | 0 | Low-quality    | Genome-fragment | NA | 1.83 | 0     |
| S17_k141_119935                      |          | 1530  | No  | NA  | 0 | 0 | Low-quality    | Genome-fragment | NA | 0    | 0     |
| S3-final-viral-combined_k141_122693  | [full]   | 2835  | No  | NA  | 0 | 1 | Not-determined | Genome-fragment | NA | 3.37 | 0     |
| S12-final-viral-combined_k141_24818  | [full]   | 1530  | No  | NA  | 0 | 2 | Low-quality    | Genome-fragment | NA | 0.63 | 0     |
| S4-final-viral-combined_k141_66750   | [full]   | 1530  | No  | NA  | 0 | 2 | Low-quality    | Genome-fragment | NA | 0    | 0     |
| S3-final-viral-combined_k141_70955   | [full]   | 2555  | No  | NA  | 0 | 2 | Not-determined | Genome-fragment | NA | 0    | 0     |
| S3-final-viral-combined_k141_13364   | [full]   | 2909  | No  | NA  | 0 | 2 | Not-determined | Genome-fragment | NA | 0    | 0     |
| S6-final-viral-combined_k141_6978    | [full]   | 1530  | No  | NA  | 1 | 0 | Low-quality    | Genome-fragment | NA | 2.58 | 0     |
| S3-final-viral-combined_k141_105523  | [full]   | 3335  | No  | NA  | 0 | 0 | Not-determined | Genome-fragment | NA | 0    | 0     |
| S6_k141_59262                        |          | 1530  | No  | NA  | 3 | 0 | Low-quality    | Genome-fragment | NA | 2.96 | 0     |
| S11-final-viral-combined_k141_16866  | [full]   | 1531  | No  | NA  | 1 | 0 | Low-quality    | Genome-fragment | NA | 0    | 0     |
| S7-final-viral-combined_k141_21710   | [full]   | 1531  | No  | NA  | 1 | 0 | Low-quality    | Genome-fragment | NA | 3.87 | 0     |
| S3-final-viral-combined_k141_117076  | [full]   | 2457  | No  | NA  | 0 | 0 | Not-determined | Genome-fragment | NA | 0    | 0     |
| S3-final-viral-combined_k141_164015  | [full]   | 1477  | No  | NA  | 0 | 0 | Not-determined | Genome-fragment | NA | 0    | 0     |
| S17-final-viral-combined_k141_58120  | [full]   | 1531  | No  | NA  | 0 | 0 | Low-quality    | Genome-fragment | NA | 3.52 | 0     |
| S3-final-viral-combined_k141_111204  | [full]   | 2176  | No  | NA  | 0 | 1 | Not-determined | Genome-fragment | NA | 0    | 0     |
| S3-final-viral-combined_k141_105571  | [full]   | 1471  | No  | NA  | 0 | 2 | Not-determined | Genome-fragment | NA | 0    | 0     |
| S12-final-viral-combined_k141_300215 | [full]   | 1531  | No  | NA  | 0 | 0 | Low-quality    | Genome-fragment | NA | 2.32 | 0     |
| S3-final-viral-combined_k141_7700    | [full]   | 1837  | No  | NA  | 0 | 0 | Not-determined | Genome-fragment | NA | 0    | 0     |
| S2_k141_122722                       |          | 1531  | No  | NA  | 0 | 0 | Low-quality    | Genome-fragment | NA | 2.21 | 0     |
| S8-final-viral-combined_k141_221999  | [full]   | 1531  | No  | NA  | 0 | 1 | Low-quality    | Genome-fragment | NA | 0.81 | 0     |
| S3-final-viral-combined_k141_134349  | [full]   | 1828  | No  | NA  | 0 | 0 | Not-determined | Genome-fragment | NA | 0    | 0     |
| S7-final-viral-combined_k141_73669   | [full]   | 1532  | No  | NA  | 2 | 0 | Low-quality    | Genome-fragment | NA | 2.46 | 0     |
| S3-final-viral-combined_k141_206712  | [full]   | 6342  | No  | NA  | 0 | 4 | Not-determined | Genome-fragment | NA | 0    | 0     |
| S3-final-viral-combined_k141_25069   | [full]   | 22693 | No  | NA  | 0 | 2 | Not-determined | Genome-fragment | NA | 0    | 0     |
| S17-final-viral-combined_k141_108439 | [full]   | 1532  | No  | NA  | 0 | 1 | Low-quality    | Genome-fragment | NA | 2.01 | 0     |
| S3-final-viral-combined_k141_134366  | [full]   | 4867  | No  | NA  | 0 | 2 | Not-determined | Genome-fragment | NA | 0    | 0     |
| S12_k141_350086                      |          | 1532  | No  | NA  | 0 | 0 | Low-quality    | Genome-fragment | NA | 0.81 | 0     |
| S3-final-viral-combined_k141_53790   | [full]   | 1290  | No  | NA  | 0 | 1 | Not-determined | Genome-fragment | NA | 0    | 0     |
| S2-final-viral-combined_k141_53185   | [full]   | 1532  | No  | NA  | 1 | 0 | Low-quality    | Genome-fragment | NA | 0.61 | 0     |
| S3-final-viral-combined_k141_48185   | [full]   | 1404  | No  | NA  | 0 | 1 | Not-determined | Genome-fragment | NA | 0    | 0     |
| S3-final-viral-combined_k141_117148  | [full]   | 1490  | No  | NA  | 0 | 2 | Not-determined | Genome-fragment | NA | 0    | 0     |
| S3-final-viral-combined_k141_16493   | [full]   | 2611  | No  | NA  | 0 | 2 | Not-determined | Genome-fragment | NA | 0    | 0     |
| S2_k141_166613                       |          | 1532  | No  | NA  | 0 | 0 | Low-quality    | Genome-fragment | NA | 1.38 | 0     |
| S3-final-viral-combined_k141_71111   | [full]   | 2098  | No  | NA  | 0 | 2 | Not-determined | Genome-fragment | NA | 0    | 0     |
| S4-final-viral-combined_k141_99791   | [full]   | 1532  | No  | NA  | 1 | 0 | Low-quality    | Genome-fragment | NA | 0.81 | 0     |
| S4-final-viral-combined_k141_162348  | [full]   | 1532  | No  | NA  | 1 | 0 | Low-quality    | Genome-fragment | NA | 1.74 | 0     |
| S6-final-viral-combined_k141_10474   | [full]   | 1532  | No  | NA  | 0 | 0 | Low-quality    | Genome-fragment | NA | 2.76 | 0     |
| S3-final-viral-combined_k141_13506   | [full]   | 3222  | No  | NA  | 0 | 2 | Not-determined | Genome-fragment | NA | 0    | 0     |
| S3-final-viral-combined_k141_1765    | [full]   | 1367  | No  | NA  | 0 | 0 | Not-determined | Genome-fragment | NA | 0    | 0     |
| S3-final-viral-combined_k141_82698   | [full]   | 5968  | No  | NA  | 0 | 0 | Not-determined | Genome-fragment | NA | 0    | 0     |
| S8-final-viral-combined_k141_105698  | [full]   | 1532  | No  | NA  | 0 | 0 | Low-quality    | Genome-fragment | NA | 1    | 0     |
| S8-final-viral-combined_k141_163521  | [full]   | 1532  | No  | NA  | 0 | 1 | Low-quality    | Genome-fragment | NA | 2.28 | 0     |
| S8-final-viral-combined_k141_146423  | [full]   | 1532  | No  | NA  | 0 | 0 | Low-quality    | Genome-fragment | NA | 1.65 | 0     |
| S3-final-viral-combined_k141_94100   | [full]   | 2145  | No  | NA  | 0 | 0 | Not-determined | Genome-fragment | NA | 0    | 0     |
| S1-final-viral-combined_k141_186714  | [full]   | 1533  | No  | NA  | 1 | 0 | Low-quality    | Genome-fragment | NA | 3.56 | 0     |
| S3-final-viral-combined_k141_117236  | [full]   | 5279  | No  | NA  | 0 | 2 | Not-determined | Genome-fragment | NA | 0    | 0     |
| S3-final-viral-combined_k141_25185   | [full]   | 1000  | No  | NA  | 0 | 1 | Not-determined | Genome-fragment | NA | 0    | 0     |
| S5-final-viral-combined_k141_127828  | [R2gene] | 1533  | No  | NA  | 1 | 0 | Low-quality    | Genome-fragment | NA | 2.24 | 0     |
| S3-final-viral-combined_k141_76821   | [full]   | 1295  | No  | NA  | 0 | 0 | Not-determined | Genome-fragment | NA | 0    | 0     |
| S3-final-viral-combined_k141_13573   | [full]   | 2060  | No  | NA  | 0 | 2 | Not-determined | Genome-fragment | NA | 0    | 0     |
| S7-final-viral-combined_k141_144420  | [full]   | 1533  | No  | NA  | 2 | 0 | Low-quality    | Genome-fragment | NA | 4.09 | 0     |
| S3-final-viral-combined_k141_99600   | [full]   | 1771  | No  | NA  | 0 | 0 | Not-determined | Genome-fragment | NA | 0    | 0     |
| S3-final-viral-combined_k141_12509   | [full]   | 1200  | No  | NA  | 0 | 2 | Not-determined | Genome-fragment | NA | 0    | 0     |
| S17-final-viral-combined_k141_58156  | [full]   | 1533  | No  | NA  | 0 | 0 | Low-quality    | Genome-fragment | NA | 1.84 | 0     |
| S17-final-viral-combined_k141_161521 | [full]   | 1533  | No  | NA  |   |   |                |                 |    |      |       |



|                                      |          |       |    |    |   |   |                |                 |      |   |
|--------------------------------------|----------|-------|----|----|---|---|----------------|-----------------|------|---|
| S3-final-viral-combined_k141_65651   | [full]   | 10991 | No | NA | 0 | 9 | Not-determined | Genome-fragment | NA   | 0 |
| S3-final-viral-combined_k141_99861   | [full]   | 1316  | No | NA | 0 | 0 | Not-determined | Genome-fragment | NA   | 0 |
| S3-final-viral-combined_k141_134778  | [full]   | 1591  | No | NA | 0 | 2 | Not-determined | Genome-fragment | NA   | 0 |
| S17-k141_149662                      |          | 1535  | No | NA | 0 | 2 | Low-quality    | Genome-fragment | 1.1  | 0 |
| S12-final-viral-combined_k141_31748  | [full]   | 1535  | No | NA | 1 | 0 | Low-quality    | Genome-fragment | 0.96 | 0 |
| S3-final-viral-combined_k141_62616   | [full]   | 1282  | No | NA | 0 | 1 | Not-determined | Genome-fragment | NA   | 0 |
| S12-final-viral-combined_k141_284524 | [full]   | 1535  | No | NA | 0 | 1 | Low-quality    | Genome-fragment | 2.91 | 0 |
| S3-final-viral-combined_k141_21053   | [full]   | 1287  | No | NA | 0 | 0 | Not-determined | Genome-fragment | NA   | 0 |
| S6-final-viral-combined_k141_64661   | [full]   | 1535  | No | NA | 0 | 0 | Low-quality    | Genome-fragment | 4    | 0 |
| S3-final-viral-combined_k141_8085    | [full]   | 3514  | No | NA | 1 | 2 | Not-determined | Genome-fragment | NA   | 0 |
| S8-final-viral-combined_k141_112912  | [full]   | 1535  | No | NA | 3 | 0 | Low-quality    | Genome-fragment | 1.14 | 0 |
| S3-final-viral-combined_k141_105919  | [full]   | 3046  | No | NA | 0 | 1 | Not-determined | Genome-fragment | NA   | 0 |
| S3-final-viral-combined_k141_134829  | [full]   | 1096  | No | NA | 0 | 2 | Not-determined | Genome-fragment | NA   | 0 |
| S3-final-viral-combined_k141_196141  | [full]   | 2259  | No | NA | 0 | 0 | Not-determined | Genome-fragment | NA   | 0 |
| S3-final-viral-combined_k141_8096    | [full]   | 1088  | No | NA | 0 | 2 | Not-determined | Genome-fragment | NA   | 0 |
| S9-final-viral-combined_k141_89512   | [full]   | 1536  | No | NA | 0 | 1 | Low-quality    | Genome-fragment | 4.5  | 0 |
| S11-final-viral-combined_k141_217110 | [full]   | 1536  | No | NA | 2 | 0 | Low-quality    | Genome-fragment | 6.29 | 0 |
| S3-final-viral-combined_k141_81131   | [full]   | 2563  | No | NA | 0 | 1 | Not-determined | Genome-fragment | NA   | 0 |
| S3-final-viral-combined_k141_117576  | [full]   | 2452  | No | NA | 0 | 2 | Not-determined | Genome-fragment | NA   | 0 |
| S3-final-viral-combined_k141_37045   | [full]   | 1095  | No | NA | 0 | 1 | Not-determined | Genome-fragment | NA   | 0 |
| S3-final-viral-combined_k141_105956  | [full]   | 1362  | No | NA | 0 | 1 | Not-determined | Genome-fragment | NA   | 0 |
| S1-final-viral-combined_k141_106194  | [full]   | 1536  | No | NA | 0 | 0 | Low-quality    | Genome-fragment | 4.18 | 0 |
| S1-final-viral-combined_k141_370308  | [full]   | 1536  | No | NA | 0 | 1 | Low-quality    | Genome-fragment | 1.26 | 0 |
| S3-final-viral-combined_k141_123287  | [full]   | 1184  | No | NA | 0 | 1 | Not-determined | Genome-fragment | NA   | 0 |
| S3-final-viral-combined_k141_129245  | [full]   | 4634  | No | NA | 0 | 4 | Not-determined | Genome-fragment | NA   | 0 |
| S1_k141_231778                       |          | 1536  | No | NA | 0 | 0 | Low-quality    | Genome-fragment | 3.2  | 0 |
| S3-final-viral-combined_k141_2692    | [full]   | 2226  | No | NA | 0 | 3 | Not-determined | Genome-fragment | NA   | 0 |
| S5-final-viral-combined_k141_106689  | [full]   | 1536  | No | NA | 0 | 0 | Low-quality    | Genome-fragment | 3.88 | 0 |
| S3-final-viral-combined_k141_111790  | [full]   | 2754  | No | NA | 0 | 2 | Not-determined | Genome-fragment | NA   | 0 |
| S5-final-viral-combined_k141_47616   | [H2gene] | 1536  | No | NA | 1 | 0 | Low-quality    | Genome-fragment | 4.08 | 0 |
| S7-final-viral-combined_k141_65373   | [full]   | 1536  | No | NA | 0 | 1 | Low-quality    | Genome-fragment | 2.05 | 0 |
| S7-final-viral-combined_k141_152389  | [full]   | 1536  | No | NA | 0 | 0 | Low-quality    | Genome-fragment | 3.55 | 0 |
| S12-final-viral-combined_k141_100642 | [full]   | 1536  | No | NA | 1 | 0 | Low-quality    | Genome-fragment | 2.71 | 0 |
| S3-final-viral-combined_k141_123164  | [full]   | 2351  | No | NA | 0 | 2 | Not-determined | Genome-fragment | NA   | 0 |
| S12-final-viral-combined_k141_21684  | [full]   | 1536  | No | NA | 0 | 0 | Low-quality    | Genome-fragment | 3.58 | 0 |
| S12-final-viral-combined_k141_32413  | [full]   | 1536  | No | NA | 0 | 0 | Low-quality    | Genome-fragment | 3.55 | 0 |
| S4_k141_40148                        |          | 1536  | No | NA | 1 | 0 | Low-quality    | Genome-fragment | 2.65 | 0 |
| S3-final-viral-combined_k141_89054   | [full]   | 2481  | No | NA | 0 | 0 | Not-determined | Genome-fragment | NA   | 0 |
| S11-final-viral-combined_k141_294648 | [full]   | 1537  | No | NA | 0 | 0 | Low-quality    | Genome-fragment | 0.97 | 0 |
| S3-final-viral-combined_k141_106065  | [full]   | 4333  | No | NA | 0 | 2 | Not-determined | Genome-fragment | NA   | 0 |
| S1-final-viral-combined_k141_168094  | [full]   | 1537  | No | NA | 0 | 2 | Low-quality    | Genome-fragment | 0.8  | 0 |
| S3-final-viral-combined_k141_134915  | [full]   | 4423  | No | NA | 0 | 2 | Not-determined | Genome-fragment | NA   | 0 |
| S1-final-viral-combined_k141_275678  | [full]   | 1537  | No | NA | 0 | 1 | Low-quality    | Genome-fragment | 2    | 0 |
| S3-final-viral-combined_k141_13929   | [full]   | 2703  | No | NA | 0 | 1 | Not-determined | Genome-fragment | NA   | 0 |
| S3-final-viral-combined_k141_24695   | [full]   | 1877  | No | NA | 0 | 1 | Not-determined | Genome-fragment | NA   | 0 |
| S3-final-viral-combined_k141_42789   | [full]   | 1503  | No | NA | 0 | 1 | Not-determined | Genome-fragment | NA   | 0 |
| S3-final-viral-combined_k141_117738  | [full]   | 1032  | No | NA | 0 | 0 | Not-determined | Genome-fragment | NA   | 0 |
| S3-final-viral-combined_k141_129421  | [full]   | 2250  | No | NA | 0 | 2 | Not-determined | Genome-fragment | NA   | 0 |
| S1-final-viral-combined_k141_133338  | [full]   | 1537  | No | NA | 0 | 0 | Low-quality    | Genome-fragment | 2.4  | 0 |
| S1_k141_172621                       |          | 1537  | No | NA | 0 | 0 | Low-quality    | Genome-fragment | 1.04 | 0 |
| S3-final-viral-combined_k141_8317    | [full]   | 2238  | No | NA | 0 | 1 | Not-determined | Genome-fragment | NA   | 0 |
| S3-final-viral-combined_k141_65873   | [full]   | 2568  | No | NA | 0 | 2 | Not-determined | Genome-fragment | NA   | 0 |
| S3-final-viral-combined_k141_42812   | [full]   | 1668  | No | NA | 0 | 1 | Not-determined | Genome-fragment | NA   | 0 |
| S5-final-viral-combined_k141_9832    | [full]   | 1537  | No | NA | 2 | 0 | Low-quality    | Genome-fragment | 2.81 | 0 |
| S3-final-viral-combined_k141_54424   | [full]   | 1849  | No | NA | 0 | 2 | Not-determined | Genome-fragment | NA   | 0 |
| S17_k141_7039                        |          | 1537  | No | NA | 0 | 1 | Low-quality    | Genome-fragment | 1.19 | 0 |
| S12_k141_38187                       |          | 1537  | No | NA | 0 | 0 | Low-quality    | Genome-fragment | 2.95 | 0 |
| S2-final-viral-combined_k141_11291   | [full]   | 1537  | No | NA | 0 | 1 | Low-quality    | Genome-fragment | 4.35 | 0 |
| S4_k141_8407                         |          | 1537  | No | NA | 1 | 0 | Low-quality    | Genome-fragment | 1.55 | 0 |
| S3-final-viral-combined_k141_129470  | [full]   | 1895  | No | NA | 0 | 2 | Not-determined | Genome-fragment | NA   | 0 |
| S3-final-viral-combined_k141_842     | [full]   | 10479 | No | NA | 0 | 3 | Not-determined | Genome-fragment | NA   | 0 |
| S3-final-viral-combined_k141_117805  | [full]   | 2968  | No | NA | 0 | 2 | Not-determined | Genome-fragment | NA   | 0 |
| S3-final-viral-combined_k141_135056  | [full]   | 5394  | No | NA | 0 | 3 | Not-determined | Genome-fragment | NA   | 0 |
| S9-final-viral-combined_k141_89155   | [full]   | 1538  | No | NA | 0 | 0 | Low-quality    | Genome-fragment | 3.76 | 0 |
| S3-final-viral-combined_k141_2921    | [full]   | 1541  | No | NA | 0 | 2 | Not-determined | Genome-fragment | NA   | 0 |
| S3-final-viral-combined_k141_42853   | [full]   | 10209 | No | NA | 0 | 3 | Not-determined | Genome-fragment | NA   | 0 |
| S1-final-viral-combined_k141_223700  | [full]   | 1538  | No | NA | 1 | 0 | Low-quality    | Genome-fragment | 4.41 | 0 |
| S3-final-viral-combined_k141_77451   | [full]   | 5855  | No | NA | 0 | 4 | Not-determined | Genome-fragment | NA   | 0 |
| S1-final-viral-combined_k141_28681   | [H2gene] | 1538  | No | NA | 0 | 0 | Low-quality    | Genome-fragment | 3.25 | 0 |
| S5-final-viral-combined_k141_179389  | [full]   | 1538  | No | NA | 0 | 0 | Low-quality    | Genome-fragment | 2.75 | 0 |
| S3-final-viral-combined_k141_111996  | [full]   | 2865  | No | NA | 0 | 0 | Not-determined | Genome-fragment | NA   | 0 |
| S7-final-viral-combined_k141_3541    | [full]   | 1538  | No | NA | 0 | 1 | Low-quality    | Genome-fragment | 1.95 | 0 |
| S12-final-viral-combined_k141_126192 | [full]   | 1538  | No | NA | 0 | 1 | Low-quality    | Genome-fragment | 3.32 | 0 |
| S3-final-viral-combined_k141_42891   | [full]   | 2603  | No | NA | 0 | 2 | Not-determined | Genome-fragment | NA   | 0 |
| S12-final-viral-combined_k141_32529  | [H2gene] | 1538  | No | NA | 1 | 0 | Low-quality    | Genome-fragment | 3.99 | 0 |
| S2-final-viral-combined_k141_8304    | [H2gene] | 1538  | No | NA | 1 | 0 | Low-quality    | Genome-fragment | 4.03 | 0 |
| S3-final-viral-combined_k141_83426   | [full]   | 3099  | No | NA | 0 | 3 | Not-determined | Genome-fragment | NA   | 0 |
| S2_k141_237391                       |          | 1538  | No | NA | 0 | 1 | Low-quality    | Genome-fragment | 0.61 | 0 |
| S6_k141_37415                        |          | 1538  | No | NA | 0 | 0 | Low-quality    | Genome-fragment | 2.03 | 0 |
| S3-final-viral-combined_k141_123576  | [full]   | 2116  | No | NA | 0 | 2 | Not-determined | Genome-fragment | NA   | 0 |
| S3-final-viral-combined_k141_31493   | [full]   | 4838  | No | NA | 0 | 2 | Not-determined | Genome-fragment | NA   | 0 |
| S3-final-viral-combined_k141_659712  | [full]   | 3074  | No | NA | 0 | 3 | Not-determined | Genome-fragment | NA   | 0 |
| S3-final-viral-combined_k141_48831   | [full]   | 1250  | No | NA | 0 | 1 | Not-determined | Genome-fragment | NA   | 0 |
| S3-final-viral-combined_k141_89211   | [full]   | 3623  | No | NA | 0 | 1 | Not-determined | Genome-fragment | NA   | 0 |
| S3-final-viral-combined_k141_89216   | [full]   | 1000  | No | NA | 0 | 1 | Not-determined | Genome-fragment | NA   | 0 |
| S8_k141_180280                       |          | 1538  | No | NA | 0 | 0 | Low-quality    | Genome-fragment | 2.61 | 0 |
| S9-final-viral-combined_k141_64655   | [full]   | 1539  | No | NA | 0 | 0 | Low-quality    | Genome-fragment | 4.24 | 0 |
| S3-final-viral-combined_k141_48858   | [full]   | 1618  | No | NA | 0 | 2 | Not-determined | Genome-fragment | NA   | 0 |
| S3-final-viral-combined_k141_14115   | [full]   | 1154  | No | NA | 0 | 2 | Not-determined | Genome-fragment | NA   | 0 |
| S7-final-viral-combined_k141_137658  | [full]   | 1539  | No | NA | 0 | 2 | Low-quality    | Genome-fragment | 3.55 | 0 |
| S17-final-viral-combined_k141_174888 | [full]   | 1539  | No | NA | 0 | 1 | Low-quality    | Genome-fragment | 0.7  | 0 |
| S12-final-viral-combined_k141_351539 | [full]   | 1539  | No | NA | 0 | 1 | Low-quality    | Genome-fragment | 0.62 | 0 |
| S3-final-viral-combined_k141_129572  | [full]   | 1328  | No | NA | 0 | 2 | Not-determined | Genome-fragment | NA   | 0 |
| S12-final-viral-combined_k141_34430  | [full]   | 1539  | No | NA | 0 | 0 | Low-quality    | Genome-fragment | 2.03 | 0 |
| S12-final-viral-combined_k141_25563  | [full]   | 1539  | No | NA | 0 | 0 | Low-quality    | Genome-fragment | 0.84 | 0 |
| S2-final-viral-combined_k141_49891   | [full]   | 1539  | No | NA | 0 | 0 | Low-quality    | Genome-fragment | 2.7  | 0 |
| S3-final-viral-combined_k141_14132   | [full]   | 1745  | No | NA | 0 | 0 | Not-determined | Genome-fragment | NA   | 0 |
| S3-final-viral-combined_k141_106306  | [full]   | 2405  | No | NA | 0 | 0 | Not-determined | Genome-fragment | NA   | 0 |
| S2_k141_150584                       |          | 1539  | No | NA | 0 | 1 | Low-quality    | Genome-fragment | 0.41 | 0 |
| S3-final-viral-combined_k141_106334  | [full]   | 1997  | No | NA | 0 | 0 | Not-determined | Genome-fragment | NA   | 0 |
| S4_k141_162711                       |          | 1539  | No | NA | 0 | 0 | Low-quality    | Genome-fragment | 0.99 | 0 |
| S3-final-viral-combined_k141_60378   | [full]   | 1291  | No | NA | 0 | 0 | Not-determined | Genome-fragment | NA   | 0 |
| S9_k141_117966                       |          | 1540  | No | NA | 0 | 1 | Low-quality    | Genome-fragment | 3.82 | 0 |
| S3-final-viral-combined_k141_89305   | [full]   | 1319  | No | NA | 0 | 0 | Not-determined | Genome-fragment | NA   | 0 |
| S3-final-viral-combined_k141_123671  | [full]   | 2754  | No | NA | 0 | 1 | Not-determined | Genome-fragment | NA   | 0 |
| S3-final-viral-combined_k141_8524    | [full]   | 1686  | No | NA | 0 | 2 | Not-determined | Genome-fragment | NA   | 0 |
| S11-final-viral-combined_k141_157265 | [full]   | 1540  | No | NA | 0 | 0 | Low-quality    | Genome-fragment | 4.22 | 0 |
| S3-final-viral-combined_k141_89333   | [full]   | 2533  | No | NA | 0 | 0 | Not-determined | Genome-fragment | NA   | 0 |
| S11-final-viral-combined_k141_135444 | [H2gene] | 1540  | No | NA | 0 | 1 | Low-quality    | Genome-fragment | 5.1  | 0 |
| S3-final-viral-combined_k141_20150   | [full]   | 1902  | No | NA | 0 | 0 | Not-determined | Genome-fragment | NA   | 0 |
| S3-final-viral-combined_k141_43064   | [full]   | 2538  | No | NA | 0 | 0 | Not-determined | Genome-fragment | NA   | 0 |
| S11_k141_23419                       |          | 1540  | No | NA | 1 | 0 | Low-quality    | Genome-fragment | 3.24 | 0 |
| S3-final-viral-combined_k141_135247  | [full]   | 4357  | No | NA | 0 | 1 | Not-determined | Genome-fragment | NA   | 0 |
| S1-final-viral-combined_k141_24618   | [H2gene] | 1540  | No | NA | 1 | 0 | Low-quality    | Genome-fragment | 1.16 | 0 |
| S3-final-viral-combined_k141_48986   | [full]   | 2681  | No | NA | 0 | 1 | Not-determined | Genome-fragment | NA   | 0 |
| S3-final-viral-combined_k141_31597   | [full]   | 14323 | No | NA | 0 | 8 | Not-determined | Genome-fragment | NA   | 0 |
| S1_k141_135502                       |          | 1540  | No | NA | 0 | 1 | Low-quality    | Genome-fragment | 1.92 | 0 |
| S3-final-viral-combined_k141_48907   | [full]   | 1717  | No | NA | 0 | 0 | Not-determined | Genome-fragment | NA   | 0 |
| S3-final-viral-combined_k141_129668  | [full]   | 3002  | No | NA | 0 | 1 | Not-determined | Genome-fragment | NA   | 0 |
| S3-final-viral-combined_k141_8571    | [full]   | 3091  | No | NA | 0 | 2 | Not-determined | Genome-fragment | NA   | 0 |
| S2_k141_76526                        |          | 1540  | No | NA | 1 | 0 | Low-quality    | Genome-fragment | 1.44 | 0 |
| S3-final-viral-combined_k141_17600   | [full]   | 2241  | No | NA | 0 | 1 | Not-determined | Genome-fragment | NA   | 0 |
| S3-final-viral-combined_k141_123765  | [full]   | 3145  | No | NA | 0 | 2 | Not-determined | Genome-fragment | NA   | 0 |
| S2_k141_112806                       |          | 1540  | No | NA | 1 | 0 | Low-quality    | Genome-fragment | 1.14 | 0 |
| S3-final-viral-combined_k141_129704  | [full]   | 1225  | No | NA | 0 | 1 | Not-determined | Genome-fragment | NA   | 0 |
| S3-final-viral-combined_k141_106453  | [full]   | 2866  | No | NA | 0 | 0 | Not-determined | Genome-fragment | NA   | 0 |
| S3-final-viral-combined_k141_91008   | [full]   | 1540  | No | NA | 0 | 0 | Low-quality    | Genome-fragment | 3.62 | 0 |
| S3-final-viral-combined_k141_129711  | [full]   | 3218  | No | NA | 0 | 1 | Not-determined | Genome-fragment | NA   | 0 |
| S3-final-viral-combined_k141_20213   | [full]   | 2005  | No | NA | 0 | 0 | Not-determined | Genome-fragment | NA   | 0 |
| S3-final-viral-combined_k141_89434   | [full]   | 3153  | No | NA | 0 | 0 | Not-determined | Genome-fragment | NA   | 0 |
| S3-final-viral-combined_k141_87775   | [full]   | 1540  | No | NA | 1 | 0 | Low-quality    | Genome-fragment | 2.69 | 0 |



|                                      |          |       |     |    |     |    |                |                 |                 |     |       |
|--------------------------------------|----------|-------|-----|----|-----|----|----------------|-----------------|-----------------|-----|-------|
| S17-final-viral-combined_k141_155440 | [full]   | 1541  | No  | NA | 1   | 0  | Low-quality    | Genome-fragment | 0.97            | 0   |       |
| S17-k141_189032                      |          | 1541  | No  | NA | 0   | 1  | Low-quality    | Genome-fragment | 0.79            | 0   |       |
| S3-final-viral-combined_k141_54959   | [full]   | 3458  | No  | NA | 0   | 2  | Not-determined | Genome-fragment | NA              | 0   |       |
| S12-final-viral-combined_k141_387819 | [full]   | 1541  | No  | NA | 0   | 0  | Low-quality    | Genome-fragment | 3.2             | 0   |       |
| S3-final-viral-combined_k141_106671  | [full]   | 1835  | No  | NA | 0   | 0  | Not-determined | Genome-fragment | NA              | 0   |       |
| S2-final-viral-combined_k141_17841   | [full]   | 1541  | No  | NA | 0   | 0  | Low-quality    | Genome-fragment | 2.41            | 0   |       |
| S3-final-viral-combined_k141_54865   | [full]   | 4932  | No  | NA | 0   | 2  | Not-determined | Genome-fragment | NA              | 0   |       |
| S3-final-viral-combined_k141_66515   | [full]   | 2159  | No  | NA | 0   | 0  | Not-determined | Genome-fragment | NA              | 0   |       |
| S3-final-viral-combined_k141_129586  | [full]   | 15044 | No  | NA | 10  | 0  | Not-determined | Genome-fragment | NA              | 0   |       |
| S2-final-viral-combined_k141_211898  | [full]   | 1541  | No  | NA | 1   | 0  | Low-quality    | Genome-fragment | 3.04            | 0   |       |
| S2-final-viral-combined_k141_213400  | [full]   | 1541  | No  | NA | 0   | 0  | Low-quality    | Genome-fragment | 2.53            | 0   |       |
| S3-final-viral-combined_k141_49357   | [full]   | 1282  | No  | NA | 1   | 1  | Not-determined | Genome-fragment | NA              | 0   |       |
| S6-final-viral-combined_k141_53141   | [full]   | 1541  | No  | NA | 0   | 2  | Low-quality    | Genome-fragment | 0.76            | 0   |       |
| S8_k141_233666                       |          | 1541  | No  | NA | 0   | 0  | Low-quality    | Genome-fragment | 3.79            | 0   |       |
| S3-final-viral-combined_k141_129975  | [full]   | 1141  | No  | NA | 0   | 2  | Not-determined | Genome-fragment | NA              | 0   |       |
| S3-final-viral-combined_k141_126293  | [full]   | 7527  | No  | NA | 0   | 5  | Not-determined | Genome-fragment | NA              | 0   |       |
| S9_k141_34069                        |          | 1542  | No  | NA | 0   | 0  | Low-quality    | Genome-fragment | 4.42            | 0   |       |
| S3-final-viral-combined_k141_95336   | [full]   | 1559  | No  | NA | 0   | 0  | Not-determined | Genome-fragment | NA              | 0   |       |
| S3-final-viral-combined_k141_147100  | [full]   | 1542  | No  | NA | 0   | 1  | Low-quality    | Genome-fragment | 1.84            | 0   |       |
| S3-final-viral-combined_k141_3483    | [full]   | 4817  | No  | NA | 0   | 1  | Not-determined | Genome-fragment | NA              | 0   |       |
| S3_k141_123093                       |          | 1542  | Yes | NA | 566 | 1  | 1              | Low-quality     | Genome-fragment | 0.7 | 63.29 |
| S5-final-viral-combined_k141_11663   | [full]   | 1542  | No  | NA | 3   | 0  | Low-quality    | Genome-fragment | 3.17            | 0   |       |
| S5_k141_111458                       |          | 1542  | No  | NA | 1   | 0  | Low-quality    | Genome-fragment | 16.29           | 0   |       |
| S3-final-viral-combined_k141_124101  | [full]   | 1099  | No  | NA | 0   | 0  | Not-determined | Genome-fragment | NA              | 0   |       |
| S17-final-viral-combined_k141_167062 | [full]   | 1542  | No  | NA | 0   | 1  | Low-quality    | Genome-fragment | 1.17            | 0   |       |
| S3-final-viral-combined_k141_130018  | [full]   | 2380  | No  | NA | 0   | 0  | Not-determined | Genome-fragment | NA              | 0   |       |
| S3-final-viral-combined_k141_14601   | [full]   | 2798  | No  | NA | 0   | 2  | Not-determined | Genome-fragment | NA              | 0   |       |
| S3-final-viral-combined_k141_112613  | [full]   | 3074  | No  | NA | 0   | 2  | Not-determined | Genome-fragment | NA              | 0   |       |
| S3-final-viral-combined_k141_26301   | [full]   | 3455  | No  | NA | 0   | 3  | Not-determined | Genome-fragment | NA              | 0   |       |
| S17-final-viral-combined_k141_50590  | [full]   | 1542  | No  | NA | 0   | 0  | Low-quality    | Genome-fragment | 3.28            | 0   |       |
| S12-final-viral-combined_k141_254860 | [full]   | 1542  | No  | NA | 0   | 0  | Low-quality    | Genome-fragment | 3.27            | 0   |       |
| S3-final-viral-combined_k141_37940   | [full]   | 1606  | No  | NA | 0   | 0  | Not-determined | Genome-fragment | NA              | 0   |       |
| S12-final-viral-combined_k141_370474 | [H2gene] | 1542  | No  | NA | 2   | 0  | Low-quality    | Genome-fragment | 3.36            | 0   |       |
| S3-final-viral-combined_k141_43489   | [full]   | 2577  | No  | NA | 0   | 1  | Not-determined | Genome-fragment | NA              | 0   |       |
| S3-final-viral-combined_k141_72275   | [full]   | 4730  | No  | NA | 0   | 3  | Not-determined | Genome-fragment | NA              | 0   |       |
| S3-final-viral-combined_k141_14647   | [full]   | 1041  | No  | NA | 0   | 1  | Not-determined | Genome-fragment | NA              | 0   |       |
| S2-final-viral-combined_k141_243961  | [H2gene] | 1542  | No  | NA | 1   | 0  | Low-quality    | Genome-fragment | 1.61            | 0   |       |
| S3-final-viral-combined_k141_95465   | [full]   | 4013  | No  | NA | 0   | 2  | Not-determined | Genome-fragment | NA              | 0   |       |
| S8-final-viral-combined_k141_14731   | [full]   | 1542  | No  | NA | 0   | 0  | Low-quality    | Genome-fragment | 4.28            | 0   |       |
| S3-final-viral-combined_k141_95467   | [full]   | 2998  | No  | NA | 0   | 0  | Not-determined | Genome-fragment | NA              | 0   |       |
| S3-final-viral-combined_k141_130097  | [full]   | 2831  | No  | NA | 0   | 1  | Not-determined | Genome-fragment | NA              | 0   |       |
| S1_k141_73510                        |          | 1543  | No  | NA | 0   | 0  | Low-quality    | Genome-fragment | 1.59            | 0   |       |
| S3-final-viral-combined_k141_20592   | [full]   | 2533  | No  | NA | 0   | 2  | Not-determined | Genome-fragment | NA              | 0   |       |
| S3-final-viral-combined_k141_89918   | [full]   | 1438  | No  | NA | 0   | 0  | Not-determined | Genome-fragment | NA              | 0   |       |
| S3-final-viral-combined_k141_66690   | [full]   | 1619  | No  | NA | 0   | 0  | Not-determined | Genome-fragment | NA              | 0   |       |
| S3-final-viral-combined_k141_100941  | [full]   | 20829 | No  | NA | 0   | 16 | Not-determined | Genome-fragment | NA              | 0   |       |
| S7-final-viral-combined_k141_94661   | [full]   | 1543  | No  | NA | 2   | 0  | Low-quality    | Genome-fragment | 3.82            | 0   |       |
| S3-final-viral-combined_k141_118662  | [full]   | 9295  | No  | NA | 0   | 5  | Not-determined | Genome-fragment | NA              | 0   |       |
| S17-k141_206922                      |          | 1543  | No  | NA | 0   | 0  | Low-quality    | Genome-fragment | 0.25            | 0   |       |
| S3-final-viral-combined_k141_130163  | [full]   | 1326  | No  | NA | 0   | 1  | Not-determined | Genome-fragment | NA              | 0   |       |
| S3-final-viral-combined_k141_78151   | [full]   | 1668  | No  | NA | 0   | 1  | Not-determined | Genome-fragment | NA              | 0   |       |
| S2-final-viral-combined_k141_84052   | [full]   | 1795  | No  | NA | 0   | 0  | Not-determined | Genome-fragment | NA              | 0   |       |
| S3-final-viral-combined_k141_72345   | [full]   | 2094  | No  | NA | 0   | 3  | Not-determined | Genome-fragment | NA              | 0   |       |
| S12_k141_162170                      |          | 1543  | No  | NA | 0   | 1  | Low-quality    | Genome-fragment | 1.82            | 0   |       |
| S3-final-viral-combined_k141_95522   | [full]   | 2085  | No  | NA | 0   | 0  | Not-determined | Genome-fragment | NA              | 0   |       |
| S3-final-viral-combined_k141_130188  | [full]   | 1025  | No  | NA | 0   | 1  | Not-determined | Genome-fragment | NA              | 0   |       |
| S3-final-viral-combined_k141_55258   | [full]   | 1844  | No  | NA | 0   | 1  | Not-determined | Genome-fragment | NA              | 0   |       |
| S3-final-viral-combined_k141_45886   | [full]   | 1469  | No  | NA | 0   | 1  | Not-determined | Genome-fragment | NA              | 0   |       |
| S2-final-viral-combined_k141_238512  | [full]   | 1543  | No  | NA | 0   | 1  | Low-quality    | Genome-fragment | 3               | 0   |       |
| S2-final-viral-combined_k141_221676  | [full]   | 1543  | No  | NA | 0   | 0  | Low-quality    | Genome-fragment | 1.33            | 0   |       |
| S3-final-viral-combined_k141_20708   | [full]   | 3231  | No  | NA | 0   | 2  | Not-determined | Genome-fragment | NA              | 0   |       |
| S3-final-viral-combined_k141_32013   | [full]   | 2177  | No  | NA | 0   | 2  | Not-determined | Genome-fragment | NA              | 0   |       |
| S3-final-viral-combined_k141_43601   | [full]   | 1433  | No  | NA | 0   | 1  | Not-determined | Genome-fragment | NA              | 0   |       |
| S3-final-viral-combined_k141_12018   | [full]   | 2558  | No  | NA | 0   | 1  | Not-determined | Genome-fragment | NA              | 0   |       |
| S3-final-viral-combined_k141_147538  | [full]   | 5484  | No  | NA | 0   | 4  | Not-determined | Genome-fragment | NA              | 0   |       |
| S3-final-viral-combined_k141_14771   | [full]   | 2068  | No  | NA | 0   | 2  | Not-determined | Genome-fragment | NA              | 0   |       |
| S3-final-viral-combined_k141_118746  | [full]   | 4678  | No  | NA | 0   | 3  | Not-determined | Genome-fragment | NA              | 0   |       |
| S3-final-viral-combined_k141_86165   | [full]   | 2173  | No  | NA | 0   | 2  | Not-determined | Genome-fragment | NA              | 0   |       |
| S3-final-viral-combined_k141_43638   | [full]   | 1461  | No  | NA | 0   | 0  | Not-determined | Genome-fragment | NA              | 0   |       |
| S3-final-viral-combined_k141_112800  | [full]   | 1278  | No  | NA | 0   | 1  | Not-determined | Genome-fragment | NA              | 0   |       |
| S2_k141_103924                       |          | 1543  | No  | NA | 1   | 0  | Low-quality    | Genome-fragment | 2.54            | 0   |       |
| S3-final-viral-combined_k141_78277   | [full]   | 2386  | No  | NA | 0   | 0  | Not-determined | Genome-fragment | NA              | 0   |       |
| S4-final-viral-combined_k141_34168   | [full]   | 1543  | No  | NA | 0   | 2  | Low-quality    | Genome-fragment | 1.29            | 0   |       |
| S8-final-viral-combined_k141_196277  | [full]   | 1543  | No  | NA | 0   | 1  | Low-quality    | Genome-fragment | 0.83            | 0   |       |
| S8-final-viral-combined_k141_154284  | [full]   | 1543  | No  | NA | 0   | 1  | Low-quality    | Genome-fragment | 2.67            | 0   |       |
| S9-final-viral-combined_k141_40195   | [full]   | 1544  | No  | NA | 1   | 0  | Low-quality    | Genome-fragment | 4.03            | 0   |       |
| S11-final-viral-combined_k141_204339 | [full]   | 1544  | No  | NA | 1   | 0  | Low-quality    | Genome-fragment | 1.08            | 0   |       |
| S3-final-viral-combined_k141_9173    | [full]   | 1053  | No  | NA | 0   | 1  | Not-determined | Genome-fragment | NA              | 0   |       |
| S1-final-viral-combined_k141_158861  | [H2gene] | 1544  | No  | NA | 0   | 1  | Low-quality    | Genome-fragment | 3.28            | 0   |       |
| S3-final-viral-combined_k141_14824   | [full]   | 2168  | No  | NA | 0   | 1  | Not-determined | Genome-fragment | NA              | 0   |       |
| S7-final-viral-combined_k141_21666   | [full]   | 1544  | No  | NA | 1   | 0  | Low-quality    | Genome-fragment | 0.98            | 0   |       |
| S2-final-viral-combined_k141_66816   | [full]   | 1544  | No  | NA | 0   | 0  | Not-determined | Genome-fragment | NA              | 0   |       |
| S3-final-viral-combined_k141_130350  | [full]   | 1253  | No  | NA | 0   | 0  | Not-determined | Genome-fragment | NA              | 0   |       |
| S3-final-viral-combined_k141_24442   | [full]   | 4625  | No  | NA | 0   | 3  | Not-determined | Genome-fragment | NA              | 0   |       |
| S3-final-viral-combined_k141_2776    | [full]   | 3878  | No  | NA | 0   | 3  | Not-determined | Genome-fragment | NA              | 0   |       |
| S3-final-viral-combined_k141_55385   | [full]   | 1497  | No  | NA | 0   | 0  | Not-determined | Genome-fragment | NA              | 0   |       |
| S7-final-viral-combined_k141_150263  | [full]   | 1544  | No  | NA | 0   | 0  | Low-quality    | Genome-fragment | 11.02           | 0   |       |
| S3-final-viral-combined_k141_112849  | [full]   | 1732  | No  | NA | 0   | 0  | Not-determined | Genome-fragment | NA              | 0   |       |
| S3-final-viral-combined_k141_107041  | [full]   | 1700  | No  | NA | 0   | 1  | Not-determined | Genome-fragment | NA              | 0   |       |
| S3-final-viral-combined_k141_14850   | [full]   | 7726  | No  | NA | 0   | 7  | Not-determined | Genome-fragment | NA              | 0   |       |
| S7-final-viral-combined_k141_22214   | [full]   | 1544  | No  | NA | 0   | 1  | Low-quality    | Genome-fragment | 1.16            | 0   |       |
| S3-final-viral-combined_k141_101121  | [full]   | 2155  | No  | NA | 0   | 2  | Not-determined | Genome-fragment | NA              | 0   |       |
| S3-final-viral-combined_k141_20826   | [full]   | 2225  | No  | NA | 0   | 1  | Not-determined | Genome-fragment | NA              | 0   |       |
| S3-final-viral-combined_k141_61043   | [full]   | 3516  | No  | NA | 0   | 2  | Not-determined | Genome-fragment | NA              | 0   |       |
| S17-k141_4064                        |          | 1544  | No  | NA | 0   | 2  | Low-quality    | Genome-fragment | 3.45            | 0   |       |
| S3-final-viral-combined_k141_72541   | [full]   | 1612  | No  | NA | 0   | 1  | Not-determined | Genome-fragment | NA              | 0   |       |
| S12-final-viral-combined_k141_173995 | [full]   | 1544  | No  | NA | 0   | 0  | Low-quality    | Genome-fragment | 3.06            | 0   |       |
| S12_k141_151299                      |          | 1544  | No  | NA | 0   | 0  | Low-quality    | Genome-fragment | 1.91            | 0   |       |
| S4_k141_34109                        |          | 1544  | No  | NA | 0   | 0  | Low-quality    | Genome-fragment | 1.55            | 0   |       |
| S8-final-viral-combined_k141_50713   | [full]   | 1544  | No  | NA | 0   | 0  | Low-quality    | Genome-fragment | 3.23            | 0   |       |
| S8-final-viral-combined_k141_21413   | [H2gene] | 1544  | No  | NA | 0   | 0  | Low-quality    | Genome-fragment | 1.48            | 0   |       |
| S3-final-viral-combined_k141_95724   | [full]   | 1329  | No  | NA | 0   | 1  | Not-determined | Genome-fragment | NA              | 0   |       |
| S8-final-viral-combined_k141_271611  | [H2gene] | 1544  | No  | NA | 2   | 0  | Low-quality    | Genome-fragment | 2.26            | 0   |       |
| S3-final-viral-combined_k141_32194   | [full]   | 2111  | No  | NA | 0   | 2  | Not-determined | Genome-fragment | NA              | 0   |       |
| S9-final-viral-combined_k141_59149   | [full]   | 1545  | No  | NA | 0   | 1  | Low-quality    | Genome-fragment | 2.13            | 0   |       |
| S11-final-viral-combined_k141_88042  | [full]   | 1545  | No  | NA | 2   | 0  | Low-quality    | Genome-fragment | 3.86            | 0   |       |
| S3-final-viral-combined_k141_135868  | [full]   | 2252  | No  | NA | 0   | 2  | Not-determined | Genome-fragment | NA              | 0   |       |
| S3-final-viral-combined_k141_130449  | [full]   | 1276  | No  | NA | 0   | 0  | Not-determined | Genome-fragment | NA              | 0   |       |
| S3-final-viral-combined_k141_3872    | [full]   | 1378  | No  | NA | 0   | 1  | Not-determined | Genome-fragment | NA              | 0   |       |
| S3-final-viral-combined_k141_55455   | [full]   | 1087  | No  | NA | 0   | 2  | Not-determined | Genome-fragment | NA              | 0   |       |
| S3-final-viral-combined_k141_218124  | [full]   | 1545  | No  | NA | 1   | 0  | Low-quality    | Genome-fragment | 4.42            | 0   |       |
| S3-final-viral-combined_k141_24344   | [full]   | 1741  | No  | NA | 0   | 0  | Not-determined | Genome-fragment | NA              | 0   |       |
| S3-final-viral-combined_k141_118972  | [full]   | 4246  | No  | NA | 0   | 1  | Not-determined | Genome-fragment | NA              | 0   |       |
| S3-final-viral-combined_k141_84355   | [full]   | 1444  | No  | NA | 0   | 1  | Not-determined | Genome-fragment | NA              | 0   |       |
| S3-final-viral-combined_k141_10217   | [full]   | 1545  | No  | NA | 0   | 1  | Low-quality    | Genome-fragment | 3.14            | 0   |       |
| S3-final-viral-combined_k141_20964   | [full]   | 1747  | No  | NA | 0   | 0  | Not-determined | Genome-fragment | NA              | 0   |       |
| S3-final-viral-combined_k141_124622  | [full]   | 3951  | No  | NA | 0   | 1  | Not-determined | Genome-fragment | NA              | 0   |       |
| S3-final-viral-combined_k141_67022   | [full]   | 1645  | No  | NA | 0   | 1  | Not-determined | Genome-fragment | NA              | 0   |       |
| S3-final-viral-combined_k141_10876   | [H2gene] | 1545  | No  | NA | 1   | 0  | Low-quality    | Genome-fragment | 4.5             | 0   |       |
| S3-final-viral-combined_k141_90268   | [full]   | 1859  | No  | NA | 0   | 2  | Not-determined | Genome-fragment | NA              | 0   |       |
| S3-final-viral-combined_k141_20990   | [full]   | 2334  | No  | NA | 0   | 3  | Not-determined | Genome-fragment | NA              | 0   |       |
| S3-final-viral-combined_k141_14586   | [full]   | 4748  | No  | NA | 0   | 1  | Not-determined | Genome-fragment | NA              | 0   |       |
| S3-final-viral-combined_k141_95827   | [full]   | 1719  | No  | NA | 0   | 0  | Not-determined | Genome-fragment | NA              | 0   |       |
| S3-final-viral-combined_k141_61205   | [full]   | 3871  | No  | NA | 0   | 2  | Not-determined | Genome-fragment | NA              | 0   |       |
| S5-final-viral-combined_k141_23400   | [H2gene] | 1545  | No  | NA | 0   | 1  | Low-quality    | Genome-fragment | 0.9             | 0   |       |
| S3-final-viral-combined_k141_32313   | [full]   | 3977  | No  | NA | 0   | 4  | Not-determined | Genome-fragment | NA              | 0   |       |
| S3-final-viral-combined_k141_26806   | [full]   | 4512  | No  | NA | 0   | 2  | Not-determined | Genome-fragment | NA              | 0   |       |
| S5-final-viral-combined_k141_211976  | [H2gene] | 1545  | No  | NA | 0   | 1  | Low-quality    | Genome-fragment | 4.59            | 0   |       |
| S3-final-viral-combined_k141_4012    | [full]   | 1923  | No  | NA | 0   | 0  | Not-determined | Genome-fragment | NA              | 0   |       |
| S3-final-viral-combined_k141_55604   | [full]   | 2775  | No  | NA | 0   | 3  | Not-determined | Genome-fragment | NA              | 0   |       |
| S3-final-viral-combined_k141_4026    | [full]   | 1974  | No  | NA |     |    |                |                 |                 |     |       |



|                                      |          |       |     |      |   |                |                 |                   |       |       |
|--------------------------------------|----------|-------|-----|------|---|----------------|-----------------|-------------------|-------|-------|
| S3-final-viral-combined_k141_452751  | [full]   | 1547  | No  | NA   | 1 | 0              | Low-quality     | Genome-fragment   | 4.68  | 0     |
| S3-final-viral-combined_k141_113363  | [full]   | 6572  | No  | NA   | 0 | 0              | Not-determined  | Genome-fragment   | NA    | 0     |
| S3-final-viral-combined_k141_90545   | [full]   | 1755  | No  | NA   | 0 | 0              | Not-determined  | Genome-fragment   | NA    | 0     |
| S3-final-viral-combined_k141_113366  | [full]   | 1125  | No  | NA   | 0 | 1              | Not-determined  | Genome-fragment   | NA    | 0     |
| S17_k141_246156                      |          | 1547  | No  | NA   | 0 | 0              | Low-quality     | Genome-fragment   | 2.47  | 0     |
| S12-final-viral-combined_k141_1832   | [full]   | 1547  | No  | NA   | 1 | 0              | Low-quality     | Genome-fragment   | 1.54  | 0     |
| S12-final-viral-combined_k141_199504 | [full]   | 1547  | No  | NA   | 1 | 0              | Low-quality     | Genome-fragment   | 2.35  | 0     |
| S2-final-viral-combined_k141_146212  | [full]   | 1547  | No  | NA   | 0 | 0              | Low-quality     | Genome-fragment   | 2.94  | 0     |
| S3-final-viral-combined_k141_184750  | [full]   | 5924  | No  | NA   | 0 | 0              | Not-determined  | Genome-fragment   | NA    | 0     |
| S3-final-viral-combined_k141_72923   | [full]   | 1750  | No  | NA   | 0 | 1              | Not-determined  | Genome-fragment   | NA    | 0     |
| S4_k141_104904                       |          | 1547  | No  | NA   | 0 | 0              | Low-quality     | Genome-fragment   | 2.55  | 0     |
| S3-final-viral-combined_k141_96145   | [full]   | 2778  | No  | NA   | 0 | 1              | Not-determined  | Genome-fragment   | NA    | 0     |
| S3-final-viral-combined_k141_15254   | [full]   | 1205  | No  | NA   | 0 | 0              | Not-determined  | Genome-fragment   | NA    | 0     |
| S3-final-viral-combined_k141_96156   | [full]   | 1331  | No  | NA   | 0 | 1              | Not-determined  | Genome-fragment   | NA    | 0     |
| S3-final-viral-combined_k141_96174   | [full]   | 3075  | No  | NA   | 0 | 1              | Not-determined  | Genome-fragment   | NA    | 0     |
| S3-final-viral-combined_k141_17425   | [full]   | 1689  | No  | NA   | 0 | 1              | Not-determined  | Genome-fragment   | NA    | 0     |
| S8-final-viral-combined_k141_106540  | [full]   | 1547  | No  | NA   | 3 | 0              | Low-quality     | Genome-fragment   | 2.22  | 0     |
| S8-final-viral-combined_k141_4111    | [full]   | 1547  | No  | NA   | 0 | 0              | Low-quality     | Genome-fragment   | 1.24  | 0     |
| S3-final-viral-combined_k141_21400   | [full]   | 2627  | No  | NA   | 0 | 2              | Not-determined  | Genome-fragment   | NA    | 0     |
| S3-final-viral-combined_k141_61544   | [full]   | 1273  | No  | NA   | 0 | 0              | Not-determined  | Genome-fragment   | NA    | 0     |
| S3-final-viral-combined_k141_27189   | [full]   | 1636  | No  | NA   | 0 | 2              | Not-determined  | Genome-fragment   | NA    | 0     |
| S9_k141_2885                         |          | 1548  | No  | NA   | 0 | 1              | Low-quality     | Genome-fragment   | 2.46  | 0     |
| S3-final-viral-combined_k141_113464  | [full]   | 1917  | No  | NA   | 0 | 0              | Not-determined  | Genome-fragment   | NA    | 0     |
| S3-final-viral-combined_k141_32689   | [full]   | 2593  | No  | NA   | 0 | 1              | Not-determined  | Genome-fragment   | NA    | 0     |
| S3-final-viral-combined_k141_22876   | [H2gene] | 1548  | No  | NA   | 1 | 0              | Low-quality     | Genome-fragment   | 3.3   | 0     |
| S3-final-viral-combined_k141_21421   | [full]   | 1569  | No  | NA   | 0 | 2              | Not-determined  | Genome-fragment   | NA    | 0     |
| S3-final-viral-combined_k141_96257   | [full]   | 2094  | No  | NA   | 0 | 1              | Not-determined  | Genome-fragment   | NA    | 0     |
| S3-final-viral-combined_k141_27121   | [full]   | 2147  | No  | NA   | 0 | 2              | Not-determined  | Genome-fragment   | NA    | 0     |
| S17-final-viral-combined_k141_25923  | [full]   | 1548  | No  | NA   | 0 | 0              | Low-quality     | Genome-fragment   | 2.11  | 0     |
| S3-final-viral-combined_k141_15367   | [full]   | 2631  | No  | NA   | 0 | 2              | Not-determined  | Genome-fragment   | NA    | 0     |
| S17_k141_116420                      |          | 1548  | No  | NA   | 1 | 0              | Low-quality     | Genome-fragment   | 1.02  | 0     |
| S3-final-viral-combined_k141_107626  | [full]   | 1487  | No  | NA   | 2 | Not-determined | Genome-fragment | NA                | 0     |       |
| S12-final-viral-combined_k141_152122 | [full]   | 1548  | No  | NA   | 0 | 1              | Low-quality     | Genome-fragment   | 3.64  | 0     |
| S12-final-viral-combined_k141_386882 | [full]   | 1548  | No  | NA   | 3 | 0              | Low-quality     | Genome-fragment   | 2.6   | 0     |
| S2-final-viral-combined_k141_22789   | [full]   | 1548  | No  | NA   | 1 | 0              | Low-quality     | Genome-fragment   | 3.23  | 0     |
| S3-final-viral-combined_k141_113173  | [full]   | 1600  | No  | NA   | 0 | 2              | Not-determined  | Genome-fragment   | NA    | 0     |
| S3-final-viral-combined_k141_8844    | [full]   | 3298  | No  | NA   | 0 | 0              | Not-determined  | Genome-fragment   | NA    | 0     |
| S3-final-viral-combined_k141_55990   | [full]   | 3644  | No  | NA   | 0 | 3              | Not-determined  | Genome-fragment   | NA    | 0     |
| S2_k141_226539                       |          | 1548  | No  | NA   | 0 | 2              | Low-quality     | Genome-fragment   | 1.09  | 0     |
| S3-final-viral-combined_k141_125226  | [full]   | 1402  | No  | NA   | 0 | 1              | Not-determined  | Genome-fragment   | NA    | 0     |
| S4_k141_113250                       |          | 1548  | No  | NA   | 0 | 0              | Low-quality     | Genome-fragment   | 3.28  | 0     |
| S8-final-viral-combined_k141_239595  | [full]   | 1548  | No  | NA   | 0 | 0              | Low-quality     | Genome-fragment   | 1.85  | 0     |
| S3-final-viral-combined_k141_119664  | [full]   | 2240  | No  | NA   | 0 | 2              | Not-determined  | Genome-fragment   | NA    | 0     |
| S3-final-viral-combined_k141_56033   | [full]   | 3155  | No  | NA   | 0 | 1              | Not-determined  | Genome-fragment   | NA    | 0     |
| S8_k141_137832                       |          | 1548  | No  | NA   | 0 | 0              | Low-quality     | Genome-fragment   | 0.22  | 0     |
| S3-final-viral-combined_k141_125279  | [full]   | 1204  | No  | NA   | 0 | 0              | Not-determined  | Genome-fragment   | NA    | 0     |
| S9_k141_75667                        |          | 1549  | No  | NA   | 0 | 1              | Low-quality     | Genome-fragment   | 0.55  | 0     |
| S3-final-viral-combined_k141_9947    | [full]   | 1962  | No  | NA   | 0 | 1              | Not-determined  | Genome-fragment   | NA    | 0     |
| S11-final-viral-combined_k141_184557 | [full]   | 1549  | No  | NA   | 0 | 1              | Low-quality     | Genome-fragment   | 3     | 0     |
| S11_k141_326137                      |          | 1549  | No  | NA   | 0 | 0              | Low-quality     | Genome-fragment   | 2.8   | 0     |
| S3-final-viral-combined_k141_67615   | [full]   | 3155  | No  | NA   | 0 | 1              | Not-determined  | Genome-fragment   | NA    | 0     |
| S3-final-viral-combined_k141_172028  | [full]   | 1549  | No  | NA   | 0 | 1              | Low-quality     | Genome-fragment   | 0.92  | 0     |
| S3-final-viral-combined_k141_22775   | [H2gene] | 1549  | No  | NA   | 1 | 0              | Low-quality     | Genome-fragment   | 3.59  | 0     |
| S3-final-viral-combined_k141_125322  | [full]   | 3176  | No  | NA   | 0 | 2              | Not-determined  | Genome-fragment   | NA    | 0     |
| S3-final-viral-combined_k141_56000   | [full]   | 1616  | No  | NA   | 0 | 1              | Not-determined  | Genome-fragment   | NA    | 0     |
| S3-final-viral-combined_k141_30855   | [full]   | 4612  | No  | NA   | 0 | 3              | Not-determined  | Genome-fragment   | NA    | 0     |
| S3-final-viral-combined_k141_107796  | [full]   | 3654  | No  | NA   | 0 | 1              | Not-determined  | Genome-fragment   | NA    | 0     |
| S3-final-viral-combined_k141_96475   | [full]   | 1015  | No  | NA   | 0 | 0              | Not-determined  | Genome-fragment   | NA    | 0     |
| S3-final-viral-combined_k141_131221  | [full]   | 1524  | No  | NA   | 0 | 1              | Not-determined  | Genome-fragment   | NA    | 0     |
| S17-final-viral-combined_k141_168104 | [full]   | 1549  | No  | NA   | 0 | 0              | Low-quality     | Genome-fragment   | 1.8   | 0     |
| S3-final-viral-combined_k141_4608    | [full]   | 1543  | No  | NA   | 0 | 0              | Not-determined  | Genome-fragment   | NA    | 0     |
| S3-final-viral-combined_k141_105793  | [full]   | 2927  | No  | NA   | 0 | 2              | Not-determined  | Genome-fragment   | NA    | 0     |
| S3-final-viral-combined_k141_101853  | [full]   | 1287  | No  | NA   | 0 | 0              | Not-determined  | Genome-fragment   | NA    | 0     |
| S17-final-viral-combined_k141_105720 | [full]   | 1549  | No  | NA   | 2 | 0              | Low-quality     | Genome-fragment   | 3.61  | 0     |
| S3-final-viral-combined_k141_136404  | [full]   | 2836  | No  | NA   | 0 | 2              | Not-determined  | Genome-fragment   | NA    | 0     |
| S3-final-viral-combined_k141_96518   | [full]   | 2853  | No  | NA   | 0 | 2              | Not-determined  | Genome-fragment   | NA    | 0     |
| S3-final-viral-combined_k141_131247  | [full]   | 4089  | No  | NA   | 0 | 0              | Not-determined  | Genome-fragment   | NA    | 0     |
| S3-final-viral-combined_k141_96524   | [full]   | 1047  | No  | NA   | 0 | 0              | Not-determined  | Genome-fragment   | NA    | 0     |
| S3-final-viral-combined_k141_21712   | [full]   | 1328  | No  | NA   | 0 | 2              | Not-determined  | Genome-fragment   | NA    | 0     |
| S3-final-viral-combined_k141_44501   | [full]   | 2221  | No  | NA   | 0 | 2              | Not-determined  | Genome-fragment   | NA    | 0     |
| S3-final-viral-combined_k141_27495   | [full]   | 2279  | No  | NA   | 0 | 2              | Not-determined  | Genome-fragment   | NA    | 0     |
| S3-final-viral-combined_k141_50215   | [full]   | 3468  | No  | NA   | 1 | 1              | Not-determined  | Genome-fragment   | NA    | 0     |
| S17-final-viral-combined_k141_27046  | [H2gene] | 1549  | No  | NA   | 1 | 0              | Low-quality     | Genome-fragment   | 0.59  | 0     |
| S3-final-viral-combined_k141_44506   | [full]   | 2528  | No  | NA   | 0 | 2              | Not-determined  | Genome-fragment   | NA    | 0     |
| S3-final-viral-combined_k141_44508   | [full]   | 2716  | No  | NA   | 0 | 2              | Not-determined  | Genome-fragment   | NA    | 0     |
| S3-final-viral-combined_k141_19819   | [full]   | 2889  | No  | NA   | 0 | 2              | Not-determined  | Genome-fragment   | NA    | 0     |
| S3-final-viral-combined_k141_73262   | [full]   | 33778 | No  | NA   | 5 | 1              | Medium-quality  | Genome-fragment   | 78.86 | 0     |
| S3-final-viral-combined_k141_21739   | [full]   | 1079  | No  | NA   | 0 | 1              | Not-determined  | Genome-fragment   | NA    | 0     |
| S17_k141_377843                      |          | 1549  | No  | NA   | 0 | 0              | Low-quality     | Genome-fragment   | 2.37  | 0     |
| S3-final-viral-combined_k141_32972   | [full]   | 1844  | No  | NA   | 0 | 0              | Not-determined  | Genome-fragment   | NA    | 0     |
| S12-final-viral-combined_k141_52523  | [full]   | 1549  | No  | NA   | 2 | 0              | Low-quality     | Genome-fragment   | 3.02  | 0     |
| S12_k141_35473                       |          | 1549  | Yes | 1307 | 2 | 1              | Low-quality     | Genome-fragment   | 2.98  | 15.62 |
| S3-final-viral-combined_k141_73308   | [full]   | 2946  | No  | NA   | 0 | 2              | Not-determined  | Genome-fragment   | NA    | 0     |
| S3-final-viral-combined_k141_80965   | [full]   | 1142  | No  | NA   | 0 | 7              | Not-determined  | Genome-fragment   | NA    | 0     |
| S3-final-viral-combined_k141_105146  | [full]   | 2127  | No  | NA   | 0 | 2              | Not-determined  | Genome-fragment   | NA    | 0     |
| S3-final-viral-combined_k141_125518  | [full]   | 2287  | No  | NA   | 0 | 0              | Not-determined  | Genome-fragment   | NA    | 0     |
| S3-final-viral-combined_k141_107958  | [full]   | 3973  | No  | NA   | 0 | 3              | Not-determined  | Genome-fragment   | NA    | 0     |
| S3-final-viral-combined_k141_107960  | [full]   | 4458  | No  | NA   | 0 | 0              | Not-determined  | Genome-fragment   | NA    | 0     |
| S3-final-viral-combined_k141_50344   | [full]   | 1513  | No  | NA   | 0 | 2              | Not-determined  | Genome-fragment   | NA    | 0     |
| S3-final-viral-combined_k141_27677   | [full]   | 3338  | No  | NA   | 0 | 2              | Not-determined  | Genome-fragment   | NA    | 0     |
| S2-final-viral-combined_k141_46557   | [full]   | 1549  | No  | NA   | 0 | 0              | Low-quality     | Genome-fragment   | 3.72  | 0     |
| S3-final-viral-combined_k141_33000   | [full]   | 2068  | No  | NA   | 0 | 0              | Not-determined  | Genome-fragment   | NA    | 0     |
| S8-final-viral-combined_k141_228111  | [full]   | 1549  | No  | NA   | 2 | 0              | Low-quality     | Genome-fragment   | 0.86  | 0     |
| S3-final-viral-combined_k141_50393   | [full]   | 1984  | No  | NA   | 0 | 3              | Not-determined  | Genome-fragment   | NA    | 0     |
| S3-final-viral-combined_k141_44648   | [full]   | 1633  | No  | NA   | 0 | 1              | Not-determined  | Genome-fragment   | NA    | 0     |
| S9_k141_10858                        |          | 1550  | No  | NA   | 0 | 1              | Low-quality     | Genome-fragment   | 3.1   | 0     |
| S3-final-viral-combined_k141_15739   | [full]   | 1660  | No  | NA   | 0 | 0              | Not-determined  | Genome-fragment   | NA    | 0     |
| S3-final-viral-combined_k141_21937   | [full]   | 1665  | No  | NA   | 0 | 1              | Not-determined  | Genome-fragment   | NA    | 0     |
| S3-final-viral-combined_k141_25841   | [full]   | 1550  | No  | NA   | 0 | 0              | Low-quality     | Genome-fragment   | 3.74  | 0     |
| S3-final-viral-combined_k141_62057   | [full]   | 2762  | No  | NA   | 0 | 1              | Not-determined  | Genome-fragment   | NA    | 0     |
| S1_k141_347765                       |          | 1550  | No  | NA   | 0 | 0              | Low-quality     | Genome-fragment   | 0.25  | 0     |
| S3-final-viral-combined_k141_10303   | [full]   | 4211  | No  | NA   | 0 | 1              | Not-determined  | Genome-fragment   | NA    | 0     |
| S7-final-viral-combined_k141_236578  | [full]   | 1550  | No  | NA   | 3 | 0              | Low-quality     | Genome-fragment   | 3.51  | 0     |
| S12-final-viral-combined_k141_285786 | [full]   | 1550  | No  | NA   | 1 | 0              | Low-quality     | Genome-fragment   | 4.49  | 0     |
| S3-final-viral-combined_k141_120060  | [full]   | 1459  | No  | NA   | 0 | 1              | Not-determined  | Genome-fragment   | NA    | 0     |
| S3-final-viral-combined_k141_120071  | [full]   | 1829  | No  | NA   | 0 | 1              | Not-determined  | Genome-fragment   | NA    | 0     |
| S12-final-viral-combined_k141_309394 | [full]   | 1550  | No  | NA   | 0 | 0              | Low-quality     | Genome-fragment   | 3.34  | 0     |
| S3-final-viral-combined_k141_85297   | [full]   | 1843  | No  | NA   | 0 | 2              | Not-determined  | Genome-fragment   | NA    | 0     |
| S3-final-viral-combined_k141_108101  | [full]   | 1930  | No  | NA   | 0 | 1              | Not-determined  | Genome-fragment   | NA    | 0     |
| S3-final-viral-combined_k141_131466  | [full]   | 4502  | No  | NA   | 0 | 3              | Not-determined  | Genome-fragment   | NA    | 0     |
| S3-final-viral-combined_k141_114039  | [full]   | 1615  | No  | NA   | 0 | 1              | Not-determined  | Genome-fragment   | NA    | 0     |
| S12-final-viral-combined_k141_275163 | [full]   | 1550  | No  | NA   | 0 | 1              | Low-quality     | Genome-fragment   | 2.98  | 0     |
| S3-final-viral-combined_k141_125695  | [full]   | 7452  | No  | NA   | 0 | 4              | Not-determined  | Genome-fragment   | NA    | 0     |
| S3-final-viral-combined_k141_120093  | [full]   | 1010  | No  | NA   | 0 | 1              | Not-determined  | Genome-fragment   | NA    | 0     |
| S3-final-viral-combined_k141_85235   | [full]   | 2101  | No  | NA   | 0 | 0              | Not-determined  | Genome-fragment   | NA    | 0     |
| S3-final-viral-combined_k141_56484   | [full]   | 1411  | No  | NA   | 0 | 1              | Not-determined  | Genome-fragment   | NA    | 0     |
| S4-final-viral-combined_k141_98801   | [full]   | 1550  | No  | NA   | 0 | 1              | Low-quality     | Genome-fragment   | 4.39  | 0     |
| S4_k141_158697                       |          | 1550  | No  | NA   | 2 | 0              | Low-quality     | Genome-fragment   | 2.57  | 0     |
| S3-final-viral-combined_k141_22066   | [full]   | 1211  | No  | NA   | 0 | 2              | Not-determined  | Genome-fragment   | NA    | 0     |
| S11-final-viral-combined_k141_28428  | [full]   | 2551  | No  | NA   | 3 | 0              | Low-quality     | Genome-fragment   | 4.76  | 0     |
| S3-final-viral-combined_k141_27851   | [full]   | 2714  | No  | NA   | 0 | 1              | Not-determined  | Genome-fragment   | NA    | 0     |
| S3-final-viral-combined_k141_102141  | [full]   | 2103  | No  | NA   | 0 | 1              | Not-determined  | Genome-fragment   | NA    | 0     |
| S11-final-viral-combined_k141_181393 | [full]   | 1551  | No  | NA   | 0 | 0              | Low-quality     | Genome-fragment   | 2.2   | 0     |
| S11-final-viral-combined_k141_99386  | [full]   | 1551  | No  | NA   | 1 | 0              | Low-quality     | Genome-fragment   | 4.24  | 0     |
| S3-final-viral-combined_k141_153559  | [full]   | 1551  | No  | NA   | 0 | 0              | Low-quality     | Genome-fragment   | 1.28  | 0     |
| S3-final-viral-combined_k141_131595  | [full]   | 1121  | No  | NA   | 0 | 1              | Not-determined  | Genome-fragment   | NA    | 0     |
| S3-final-viral-combined_k141_27911   | [full]   | 1000  | No  | NA   | 0 | 1              | Not-determined  | Genome-fragment   | NA    | 0     |
| S1-final-viral-combined_k141_272598  | [full]   | 1551  | No  | NA   | 0 | 0              | Low-quality     | Genome-fragment   | 4.4   | 0     |
| S12-final-viral-combined_k141_61278  | [full]   | 1551  | No  | NA   | 0 | 1              | Low-quality     | Genome-fragment   | 2.67  | 0     |
| S3-final-viral-combined_k141_22133   | [full]   | 1812  | No  | NA   | 0 | 1              | Not-determined  | Genome-fragment   | NA    | 0     |
| S2-final-viral-combined_k141_103337  | [full]   | 1551  | No  | NA   | 2 | 0              | Low-quality     | Genome-fragment</ |       |       |



|                                       |       |    |    |    |   |                |                 |       |   |
|---------------------------------------|-------|----|----|----|---|----------------|-----------------|-------|---|
| S1_k141_31516                         | 1553  | No | NA | 0  | 1 | Low-quality    | Genome-fragment | 3.1   | 0 |
| S3-final-viral-combined_k141_25649    | 2943  | No | NA | 0  | 0 | Not-determined | Genome-fragment | NA    | 0 |
| S3-final-viral-combined_k141_28139    | 1126  | No | NA | 0  | 0 | Not-determined | Genome-fragment | NA    | 0 |
| S3-final-viral-combined_k141_91417    | 3874  | No | NA | 0  | 2 | Not-determined | Genome-fragment | NA    | 0 |
| S3-final-viral-combined_k141_39670    | 10064 | No | NA | 0  | 5 | Not-determined | Genome-fragment | NA    | 0 |
| S7-final-viral-combined_k141_37636    | 1553  | No | NA | 0  | 1 | Low-quality    | Genome-fragment | 2.78  | 0 |
| S3-final-viral-combined_k141_10725    | 3024  | No | NA | 0  | 1 | Not-determined | Genome-fragment | NA    | 0 |
| S3-final-viral-combined_k141_33571    | 2956  | No | NA | 0  | 2 | Not-determined | Genome-fragment | NA    | 0 |
| S17-final-viral-combined_k141_20138   | 1553  | No | NA | 0  | 1 | Low-quality    | Genome-fragment | 2.84  | 0 |
| S3-final-viral-combined_k141_12618    | 1680  | No | NA | 0  | 2 | Not-determined | Genome-fragment | NA    | 0 |
| S3-final-viral-combined_k141_102407   | 1708  | No | NA | 0  | 0 | Not-determined | Genome-fragment | NA    | 0 |
| S3-final-viral-combined_k141_33577    | 1907  | No | NA | 0  | 0 | Not-determined | Genome-fragment | NA    | 0 |
| S3-final-viral-combined_k141_120543   | 6218  | No | NA | 0  | 4 | Not-determined | Genome-fragment | NA    | 0 |
| S17-final-viral-combined_k141_205939  | 1553  | No | NA | 2  | 0 | Low-quality    | Genome-fragment | 4.16  | 0 |
| S12-final-viral-combined_k141_293415  | 1553  | No | NA | 0  | 0 | Low-quality    | Genome-fragment | 4.12  | 0 |
| S12-final-viral-combined_k141_361150  | 1553  | No | NA | 0  | 0 | Low-quality    | Genome-fragment | 1.01  | 0 |
| S3-final-viral-combined_k141_10797    | 3022  | No | NA | 0  | 1 | Not-determined | Genome-fragment | NA    | 0 |
| S3-final-viral-combined_k141_137146   | 1007  | No | NA | 0  | 0 | Not-determined | Genome-fragment | NA    | 0 |
| S3-final-viral-combined_k141_58455    | 1620  | No | NA | 0  | 0 | Not-determined | Genome-fragment | NA    | 0 |
| S3-final-viral-combined_k141_5362     | 1943  | No | NA | 0  | 0 | Not-determined | Genome-fragment | NA    | 0 |
| S6-final-viral-combined_k141_55071    | 1553  | No | NA | 1  | 0 | Low-quality    | Genome-fragment | 2.57  | 0 |
| S8-final-viral-combined_k141_142697   | 1553  | No | NA | 4  | 0 | Low-quality    | Genome-fragment | 3.75  | 0 |
| S3-final-viral-combined_k141_108433   | 1852  | No | NA | 0  | 2 | Not-determined | Genome-fragment | NA    | 0 |
| S8-final-viral-combined_k141_274161   | 1553  | No | NA | 1  | 0 | Low-quality    | Genome-fragment | 2.69  | 0 |
| S3-final-viral-combined_k141_5382     | 2395  | No | NA | 0  | 1 | Not-determined | Genome-fragment | NA    | 0 |
| S3-final-viral-combined_k141_137170   | 2139  | No | NA | 0  | 2 | Not-determined | Genome-fragment | NA    | 0 |
| S3-final-viral-combined_k141_10826    | 1780  | No | NA | 0  | 2 | Not-determined | Genome-fragment | NA    | 0 |
| S3-final-viral-combined_k141_102464   | 2218  | No | NA | 0  | 2 | Not-determined | Genome-fragment | NA    | 0 |
| S3-final-viral-combined_k141_131504   | 2216  | No | NA | 0  | 2 | Not-determined | Genome-fragment | NA    | 0 |
| S3-final-viral-combined_k141_28280    | 2057  | No | NA | 0  | 3 | Not-determined | Genome-fragment | NA    | 0 |
| S8_k141_157572                        | 1553  | No | NA | 0  | 0 | Low-quality    | Genome-fragment | 3.45  | 0 |
| S3-final-viral-combined_k141_42504    | 1466  | No | NA | 0  | 0 | Not-determined | Genome-fragment | NA    | 0 |
| S3-final-viral-combined_k141_45189    | 2055  | No | NA | 0  | 1 | Not-determined | Genome-fragment | NA    | 0 |
| S3-final-viral-combined_k141_131927   | 1055  | No | NA | 0  | 1 | Not-determined | Genome-fragment | NA    | 0 |
| S3-final-viral-combined_k141_53836    | 2374  | No | NA | 0  | 2 | Not-determined | Genome-fragment | NA    | 0 |
| S3-final-viral-combined_k141_114531   | 1758  | No | NA | 0  | 0 | Not-determined | Genome-fragment | NA    | 0 |
| S9-final-viral-combined_k141_6398     | 1554  | No | NA | 2  | 0 | Low-quality    | Genome-fragment | 3.94  | 0 |
| S3-final-viral-combined_k141_247704   | 1554  | No | NA | 0  | 0 | Low-quality    | Genome-fragment | 3.25  | 0 |
| S3-final-viral-combined_k141_39603    | 1554  | No | NA | 0  | 0 | Low-quality    | Genome-fragment | 3.14  | 0 |
| S3-final-viral-combined_k141_45218    | 2147  | No | NA | 0  | 2 | Not-determined | Genome-fragment | NA    | 0 |
| S3-final-viral-combined_k141_102525   | 1761  | No | NA | 0  | 3 | Not-determined | Genome-fragment | NA    | 0 |
| S5-final-viral-combined_k141_26665    | 1554  | No | NA | 0  | 0 | Low-quality    | Genome-fragment | 0.84  | 0 |
| S3-final-viral-combined_k141_45242    | 1884  | No | NA | 0  | 2 | Not-determined | Genome-fragment | NA    | 0 |
| S7-final-viral-combined_k141_65609    | 1554  | No | NA | 0  | 0 | Low-quality    | Genome-fragment | 2.97  | 0 |
| S7_k141_185256                        | 1554  | No | NA | 0  | 1 | Low-quality    | Genome-fragment | 1.96  | 0 |
| S17-final-viral-combined_k141_180449  | 1554  | No | NA | 2  | 0 | Low-quality    | Genome-fragment | 5.13  | 0 |
| S3-final-viral-combined_k141_120662   | 3475  | No | NA | 0  | 1 | Not-determined | Genome-fragment | NA    | 0 |
| S3-final-viral-combined_k141_137138   | 2727  | No | NA | 0  | 2 | Not-determined | Genome-fragment | NA    | 0 |
| S3-final-viral-combined_k141_62656    | 1233  | No | NA | 0  | 2 | Not-determined | Genome-fragment | NA    | 0 |
| S17-final-viral-combined_k141_228230  | 1554  | No | NA | 1  | 0 | Low-quality    | Genome-fragment | 3.32  | 0 |
| S3-final-viral-combined_k141_45292    | 5039  | No | NA | 0  | 2 | Not-determined | Genome-fragment | NA    | 0 |
| S12-final-viral-combined_k141_25713   | 1554  | No | NA | 0  | 0 | Low-quality    | Genome-fragment | 2.59  | 0 |
| S3-final-viral-combined_k141_102604   | 2378  | No | NA | 0  | 1 | Not-determined | Genome-fragment | NA    | 0 |
| S3-final-viral-combined_k141_28386    | 2583  | No | NA | 0  | 3 | Not-determined | Genome-fragment | NA    | 0 |
| S3-final-viral-combined_k141_108588   | 18026 | No | NA | 0  | 3 | Not-determined | Genome-fragment | NA    | 0 |
| S3-final-viral-combined_k141_33850    | 1019  | No | NA | 0  | 0 | Not-determined | Genome-fragment | NA    | 0 |
| S3-final-viral-combined_k141_62696    | 3699  | No | NA | 0  | 2 | Not-determined | Genome-fragment | NA    | 0 |
| S3-final-viral-combined_k141_45305    | 19171 | No | NA | 11 | 0 | Medium-quality | Genome-fragment | 51.32 | 0 |
| S6-final-viral-combined_k141_5746     | 1554  | No | NA | 0  | 0 | Low-quality    | Genome-fragment | 1.68  | 0 |
| S3-final-viral-combined_k141_28398    | 1658  | No | NA | 0  | 1 | Not-determined | Genome-fragment | NA    | 0 |
| S3-final-viral-combined_k141_51133    | 3709  | No | NA | 0  | 3 | Not-determined | Genome-fragment | NA    | 0 |
| S3-final-viral-combined_k141_132087   | 1252  | No | NA | 0  | 1 | Not-determined | Genome-fragment | NA    | 0 |
| S3-final-viral-combined_k141_33903    | 1370  | No | NA | 0  | 0 | Not-determined | Genome-fragment | NA    | 0 |
| S3-final-viral-combined_k141_51157    | 2245  | No | NA | 0  | 1 | Not-determined | Genome-fragment | NA    | 0 |
| S3-final-viral-combined_k141_5572     | 2841  | No | NA | 0  | 2 | Not-determined | Genome-fragment | NA    | 0 |
| S3-final-viral-combined_k141_11004    | 5327  | No | NA | 0  | 2 | Not-determined | Genome-fragment | NA    | 0 |
| S9-final-viral-combined_k141_112863   | 1555  | No | NA | 0  | 0 | Low-quality    | Genome-fragment | 2.87  | 0 |
| S3-final-viral-combined_k141_91796    | 5281  | No | NA | 0  | 1 | Not-determined | Genome-fragment | NA    | 0 |
| S3-final-viral-combined_k141_86333    | 1555  | No | NA | 0  | 1 | Not-determined | Genome-fragment | NA    | 0 |
| S3-final-viral-combined_k141_45373    | 2288  | No | NA | 0  | 2 | Not-determined | Genome-fragment | NA    | 0 |
| S3-final-viral-combined_k141_114705   | 2062  | No | NA | 0  | 1 | Not-determined | Genome-fragment | NA    | 0 |
| S7-final-viral-combined_k141_237921   | 1555  | No | NA | 0  | 0 | Low-quality    | Genome-fragment | 1.73  | 0 |
| S7_k141_3808                          | 1555  | No | NA | 0  | 0 | Low-quality    | Genome-fragment | 3.08  | 0 |
| S3-final-viral-combined_k141_80182    | 5646  | No | NA | 0  | 4 | Not-determined | Genome-fragment | NA    | 0 |
| S3-final-viral-combined_k141_28454    | 1663  | No | NA | 0  | 1 | Not-determined | Genome-fragment | NA    | 0 |
| S3-final-viral-combined_k141_86076    | 2400  | No | NA | 0  | 1 | Not-determined | Genome-fragment | NA    | 0 |
| S3-final-viral-combined_k141_80194    | 2941  | No | NA | 0  | 2 | Not-determined | Genome-fragment | NA    | 0 |
| S3-final-viral-combined_k141_74275    | 3170  | No | NA | 0  | 2 | Not-determined | Genome-fragment | NA    | 0 |
| S3-final-viral-combined_k141_28477    | 1166  | No | NA | 0  | 1 | Not-determined | Genome-fragment | NA    | 0 |
| S2_k141_196082                        | 1555  | No | NA | 0  | 1 | Low-quality    | Genome-fragment | 1.11  | 0 |
| S3-final-viral-combined_k141_137426   | 2754  | No | NA | 0  | 1 | Not-determined | Genome-fragment | NA    | 0 |
| S4_k141_107246                        | 1555  | No | NA | 0  | 1 | Low-quality    | Genome-fragment | 2.65  | 0 |
| S6-final-viral-combined_k141_54264    | 1555  | No | NA | 0  | 2 | Low-quality    | Genome-fragment | 1.95  | 0 |
| S3-final-viral-combined_k141_102800   | 1313  | No | NA | 0  | 1 | Not-determined | Genome-fragment | NA    | 0 |
| S6-final-viral-combined_k141_27996    | 1555  | No | NA | 0  | 2 | Low-quality    | Genome-fragment | 0.66  | 0 |
| S3-final-viral-combined_k141_57173    | 2085  | No | NA | 0  | 1 | Not-determined | Genome-fragment | NA    | 0 |
| S3-final-viral-combined_k141_34127    | 3008  | No | NA | 0  | 4 | Not-determined | Genome-fragment | NA    | 0 |
| S3-final-viral-combined_k141_51346    | 1261  | No | NA | 0  | 1 | Not-determined | Genome-fragment | NA    | 0 |
| S3-final-viral-combined_k141_108811   | 1722  | No | NA | 0  | 1 | Not-determined | Genome-fragment | NA    | 0 |
| S9-final-viral-combined_k141_54978    | 1556  | No | NA | 1  | 0 | Low-quality    | Genome-fragment | 4.57  | 0 |
| S3-final-viral-combined_k141_28597    | 7192  | No | NA | 0  | 5 | Not-determined | Genome-fragment | NA    | 0 |
| S3-final-viral-combined_k141_57670    | 1210  | No | NA | 0  | 1 | Not-determined | Genome-fragment | NA    | 0 |
| S11-final-viral-combined_k141_135457  | 1556  | No | NA | 2  | 0 | Low-quality    | Genome-fragment | 3.95  | 0 |
| S3-final-viral-combined_k141_28618    | 4365  | No | NA | 0  | 3 | Not-determined | Genome-fragment | NA    | 0 |
| S3-final-viral-combined_k141_137578   | 1165  | No | NA | 0  | 0 | Not-determined | Genome-fragment | NA    | 0 |
| S3-final-viral-combined_k141_16731    | 5340  | No | NA | 0  | 0 | Not-determined | Genome-fragment | NA    | 0 |
| S3-final-viral-combined_k141_51393    | 1253  | No | NA | 0  | 0 | Not-determined | Genome-fragment | NA    | 0 |
| S3-final-viral-combined_k141_102522   | 1280  | No | NA | 0  | 1 | Not-determined | Genome-fragment | NA    | 0 |
| S3-final-viral-combined_k141_137571   | 2546  | No | NA | 0  | 0 | Not-determined | Genome-fragment | NA    | 0 |
| S3-final-viral-combined_k141_108852   | 2593  | No | NA | 0  | 2 | Not-determined | Genome-fragment | NA    | 0 |
| S3-final-viral-combined_k141_16751    | 3561  | No | NA | 0  | 2 | Not-determined | Genome-fragment | NA    | 0 |
| S1-final-viral-combined_k141_121314   | 1556  | No | NA | 0  | 0 | Low-quality    | Genome-fragment | 2.6   | 0 |
| S3-final-viral-combined_k141_108891   | 3545  | No | NA | 0  | 3 | Not-determined | Genome-fragment | NA    | 0 |
| S3-final-viral-combined_k141_68921    | 1636  | No | NA | 0  | 1 | Not-determined | Genome-fragment | NA    | 0 |
| S17-final-viral-combined_k141_68466   | 1556  | No | NA | 0  | 0 | Low-quality    | Genome-fragment | 3.89  | 0 |
| S3-final-viral-combined_k141_51441    | 7343  | No | NA | 1  | 6 | Not-determined | Genome-fragment | NA    | 0 |
| S3-final-viral-combined_k141_57364    | 1586  | No | NA | 0  | 1 | Not-determined | Genome-fragment | NA    | 0 |
| S3-final-viral-combined_k141_51465    | 1145  | No | NA | 0  | 1 | Not-determined | Genome-fragment | NA    | 0 |
| S3-final-viral-combined_k141_51471    | 1556  | No | NA | 0  | 0 | Not-determined | Genome-fragment | NA    | 0 |
| S3-final-viral-combined_k141_11357    | 1664  | No | NA | 0  | 2 | Not-determined | Genome-fragment | NA    | 0 |
| S3-final-viral-combined_k141_24309    | 3656  | No | NA | 0  | 2 | Not-determined | Genome-fragment | NA    | 0 |
| S12-final-viral-combined_k141_39970   | 1556  | No | NA | 0  | 0 | Low-quality    | Genome-fragment | 3.36  | 0 |
| S2-final-viral-combined_k141_102982   | 1556  | No | NA | 1  | 0 | Low-quality    | Genome-fragment | 3.02  | 0 |
| S3-final-viral-combined_k141_80477    | 2825  | No | NA | 0  | 2 | Not-determined | Genome-fragment | NA    | 0 |
| S2_k141_51878                         | 1556  | No | NA | 0  | 1 | Low-quality    | Genome-fragment | 2.15  | 0 |
| S3-final-viral-combined_k141_80493    | 1513  | No | NA | 0  | 0 | Not-determined | Genome-fragment | NA    | 0 |
| S3-final-viral-combined_k141_57455    | 5740  | No | NA | 0  | 3 | Not-determined | Genome-fragment | NA    | 0 |
| S3-final-viral-combined_k141_63078    | 1166  | No | NA | 0  | 1 | Not-determined | Genome-fragment | NA    | 0 |
| S1-final-viral-combined_k141_232781   | 1557  | No | NA | 0  | 0 | Low-quality    | Genome-fragment | 0.43  | 0 |
| S1-final-viral-combined_k141_333444   | 1557  | No | NA | 1  | 0 | Low-quality    | Genome-fragment | 37.42 | 0 |
| S2_k141_221299                        | 1557  | No | NA | 0  | 0 | Low-quality    | Genome-fragment | 2.48  | 0 |
| S3-final-viral-combined_k141_103118   | 2852  | No | NA | 0  | 1 | Not-determined | Genome-fragment | NA    | 0 |
| S3-final-viral-combined_k141_74599    | 1533  | No | NA | 0  | 1 | Not-determined | Genome-fragment | NA    | 0 |
| S3-final-viral-combined_k141_137733   | 2904  | No | NA | 0  | 2 | Not-determined | Genome-fragment | NA    | 0 |
| S7-final-viral-combined_k141_23821    | 1557  | No | NA | 1  | 0 | Low-quality    | Genome-fragment | 3.19  | 0 |
| S3-final-viral-combined_k141_51575    | 4403  | No | NA | 0  | 2 | Not-determined | Genome-fragment | NA    | 0 |
| S3-final-viral-combined_k141_63157    | 3027  | No | NA | 0  | 4 | Not-determined | Genome-fragment | NA    | 0 |
| S3-final-viral-combined_k141_244249   | 1221  | No | NA | 0  | 0 | Not-determined | Genome-fragment | NA    | 0 |
| S3-final-viral-combined_k141_109160   | 1668  | No | NA | 0  | 1 | Not-determined | Genome-fragment | NA    | 0 |
| S7-final-viral-combined_k141_243268   | 1557  | No | NA | 0  | 2 | Low-quality    | Genome-fragment | 0.93  | 0 |
| S17-final-viral-combined_k141_178402  | 1557  | No | NA | 0  | 1 | Low-quality    | Genome-fragment | 0.99  | 0 |
| S3-final-viral-combined_k141_103184   | 2462  | No | NA | 0  | 0 | Not-determined | Genome-fragment | NA    | 0 |
| S3-final-viral-combined_k141_109199   | 2132  | No | NA | 0  | 3 | Not-determined | Genome-fragment | NA    | 0 |
| S3-final-viral-combined_k141_63238    | 10611 | No | NA | 0  | 2 | Not-determined | Genome-fragment | NA    | 0 |
| S3-final-viral-combined_k141_109118   | 1749  | No | NA | 0  | 0 | Not-determined | Genome-fragment | NA    | 0 |
| S3-final-viral-combined_k141_63256    | 6844  | No | NA | 0  | 3 | Not-determined | Genome-fragment | NA    | 0 |
| S3-final-viral-combined_k141_45841    | 1024  | No | NA | 0  | 1 | Not-determined | Genome-fragment | NA    | 0 |
| S17-final-viral-combined_k141_15900   | 1557  | No | NA | 0  | 0 | Low-quality    | Genome-fragment | 3.16  | 0 |
| S3-final-viral-combined_k141_45823    | 2195  | No | NA | 0  | 2 | Not-determined | Genome-fragment | NA    | 0 |
| S3-final-viral-combined_k141_103291</ |       |    |    |    |   |                |                 |       |   |



|                                              |       |    |    |   |   |                |                 |       |   |
|----------------------------------------------|-------|----|----|---|---|----------------|-----------------|-------|---|
| S1-final-viral-combined_k141_338458  full    | 1561  | No | NA | 0 | 0 | Low-quality    | Genome-fragment | 4     | 0 |
| S1_k141_240094                               | 1561  | No | NA | 0 | 0 | Low-quality    | Genome-fragment | 0.56  | 0 |
| S12-final-viral-combined_k141_84361  H2gene  | 1561  | No | NA | 1 | 0 | Low-quality    | Genome-fragment | 2.1   | 0 |
| S12-final-viral-combined_k141_221061  H2gene | 1561  | No | NA | 1 | 0 | Low-quality    | Genome-fragment | 6.92  | 0 |
| S4_k141_125427                               | 1561  | No | NA | 0 | 0 | Low-quality    | Genome-fragment | 1.79  | 0 |
| S4_k141_27720                                | 1561  | No | NA | 0 | 0 | Low-quality    | Genome-fragment | 0.29  | 0 |
| S3-final-viral-combined_k141_25515  H2gene   | 1421  | No | NA | 0 | 1 | Not-determined | Genome-fragment | NA    | 0 |
| S11-final-viral-combined_k141_137926  full   | 1562  | No | NA | 1 | 0 | Low-quality    | Genome-fragment | 1.42  | 0 |
| S3-final-viral-combined_k141_55870  H2gene   | 232   | No | NA | 0 | 1 | Not-determined | Genome-fragment | NA    | 0 |
| S1_k141_373037                               | 1562  | No | NA | 0 | 2 | Low-quality    | Genome-fragment | 2.73  | 0 |
| S3-final-viral-combined_k141_16283  full     | 1562  | No | NA | 0 | 0 | Low-quality    | Genome-fragment | 3.68  | 0 |
| S5-final-viral-combined_k141_4939  full      | 1562  | No | NA | 0 | 0 | Low-quality    | Genome-fragment | 2.63  | 0 |
| S7-final-viral-combined_k141_239804  full    | 1562  | No | NA | 0 | 0 | Low-quality    | Genome-fragment | 0.74  | 0 |
| S3-final-viral-combined_k141_112528  H2gene  | 1060  | No | NA | 0 | 2 | Not-determined | Genome-fragment | NA    | 0 |
| S7_k141_81227                                | 1562  | No | NA | 0 | 2 | Low-quality    | Genome-fragment | 3.32  | 0 |
| S12-final-viral-combined_k141_180386  full   | 1562  | No | NA | 0 | 0 | Low-quality    | Genome-fragment | 0.38  | 0 |
| S8-final-viral-combined_k141_47265  full     | 1562  | No | NA | 0 | 1 | Low-quality    | Genome-fragment | 1.3   | 0 |
| S3-final-viral-combined_k141_43481  H2gene   | 1169  | No | NA | 0 | 1 | Not-determined | Genome-fragment | NA    | 0 |
| S9-final-viral-combined_k141_19595  full     | 1563  | No | NA | 0 | 0 | Low-quality    | Genome-fragment | 1.64  | 0 |
| S9-final-viral-combined_k141_73709  H2gene   | 1563  | No | NA | 1 | 0 | Low-quality    | Genome-fragment | 3.6   | 0 |
| S3-final-viral-combined_k141_118905  H2gene  | 1437  | No | NA | 0 | 0 | Not-determined | Genome-fragment | NA    | 0 |
| S11-final-viral-combined_k141_89341  full    | 1563  | No | NA | 1 | 0 | Low-quality    | Genome-fragment | 4.17  | 0 |
| S7-final-viral-combined_k141_95413  full     | 1563  | No | NA | 0 | 0 | Low-quality    | Genome-fragment | 1.52  | 0 |
| S3-final-viral-combined_k141_95920  H2gene   | 2607  | No | NA | 0 | 1 | Not-determined | Genome-fragment | NA    | 0 |
| S2-final-viral-combined_k141_225281  full    | 1563  | No | NA | 0 | 0 | Low-quality    | Genome-fragment | 2.68  | 0 |
| S11-final-viral-combined_k141_50431  full    | 1564  | No | NA | 0 | 0 | Low-quality    | Genome-fragment | 3.33  | 0 |
| S11-final-viral-combined_k141_37720  full    | 1564  | No | NA | 0 | 0 | Low-quality    | Genome-fragment | 2.74  | 0 |
| S3-final-viral-combined_k141_84623  H2gene   | 1204  | No | NA | 0 | 0 | Not-determined | Genome-fragment | NA    | 0 |
| S1-final-viral-combined_k141_114856  full    | 1564  | No | NA | 0 | 2 | Low-quality    | Genome-fragment | 1.46  | 0 |
| S3-final-viral-combined_k141_27067  H2gene   | 2507  | No | NA | 0 | 2 | Not-determined | Genome-fragment | NA    | 0 |
| S8-final-viral-combined_k141_116170  full    | 1564  | No | NA | 1 | 0 | Low-quality    | Genome-fragment | 3.66  | 0 |
| S8-final-viral-combined_k141_31856  full     | 1564  | No | NA | 0 | 0 | Low-quality    | Genome-fragment | 3.43  | 0 |
| S3-final-viral-combined_k141_11836  H2gene   | 1344  | No | NA | 0 | 0 | Not-determined | Genome-fragment | NA    | 0 |
| S3-final-viral-combined_k141_131250  H2gene  | 1005  | No | NA | 0 | 0 | Not-determined | Genome-fragment | NA    | 0 |
| S8-final-viral-combined_k141_147115  H2gene  | 1564  | No | NA | 1 | 0 | Low-quality    | Genome-fragment | 32.23 | 0 |
| S11-final-viral-combined_k141_304635  full   | 1565  | No | NA | 0 | 1 | Low-quality    | Genome-fragment | 1.1   | 0 |
| S11-final-viral-combined_k141_326277  full   | 1565  | No | NA | 0 | 1 | Low-quality    | Genome-fragment | 2.59  | 0 |
| S1_k141_249439                               | 1565  | No | NA | 0 | 0 | Low-quality    | Genome-fragment | 4.68  | 0 |
| S3-final-viral-combined_k141_4932  H2gene    | 1148  | No | NA | 0 | 0 | Not-determined | Genome-fragment | NA    | 0 |
| S3-final-viral-combined_k141_125751  H2gene  | 1110  | No | NA | 0 | 1 | Not-determined | Genome-fragment | NA    | 0 |
| S3-final-viral-combined_k141_36537  H2gene   | 1565  | No | NA | 0 | 1 | Low-quality    | Genome-fragment | 0.42  | 0 |
| S3-final-viral-combined_k141_91230  H2gene   | 1002  | No | NA | 0 | 0 | Not-determined | Genome-fragment | NA    | 0 |
| S3_k141_19178                                | 1565  | No | NA | 0 | 0 | Low-quality    | Genome-fragment | 1.94  | 0 |
| S7-final-viral-combined_k141_148973  full    | 1565  | No | NA | 2 | 0 | Low-quality    | Genome-fragment | 3.76  | 0 |
| S17-final-viral-combined_k141_200684  full   | 1565  | No | NA | 1 | 0 | Low-quality    | Genome-fragment | 1.05  | 0 |
| S17-final-viral-combined_k141_223564  full   | 1565  | No | NA | 0 | 2 | Low-quality    | Genome-fragment | 4.71  | 0 |
| S3-final-viral-combined_k141_85632  H2gene   | 3003  | No | NA | 0 | 0 | Not-determined | Genome-fragment | NA    | 0 |
| S12-final-viral-combined_k141_368652  full   | 1565  | No | NA | 1 | 0 | Low-quality    | Genome-fragment | 3.58  | 0 |
| S12-final-viral-combined_k141_51662  full    | 1565  | No | NA | 0 | 2 | Low-quality    | Genome-fragment | 0.79  | 0 |
| S3-final-viral-combined_k141_33852  H2gene   | 1127  | No | NA | 0 | 0 | Not-determined | Genome-fragment | NA    | 0 |
| S12-final-viral-combined_k141_65512  full    | 1565  | No | NA | 0 | 0 | Low-quality    | Genome-fragment | 3.1   | 0 |
| S12_k141_271448                              | 1565  | No | NA | 0 | 0 | Low-quality    | Genome-fragment | 0.29  | 0 |
| S8-final-viral-combined_k141_156453  full    | 1565  | No | NA | 1 | 0 | Low-quality    | Genome-fragment | 3.34  | 0 |
| S3-final-viral-combined_k141_45962  H2gene   | 1795  | No | NA | 0 | 2 | Not-determined | Genome-fragment | NA    | 0 |
| S3_k141_86259                                | 2004  | No | NA | 0 | 0 | Not-determined | Genome-fragment | NA    | 0 |
| S8-final-viral-combined_k141_210053  H2gene  | 1565  | No | NA | 0 | 0 | Low-quality    | Genome-fragment | 3.52  | 0 |
| S3_k141_51769                                | 4099  | No | NA | 0 | 4 | Not-determined | Genome-fragment | NA    | 0 |
| S3_k141_126527                               | 1550  | No | NA | 0 | 1 | Not-determined | Genome-fragment | NA    | 0 |
| S3_k141_27527                                | 1043  | No | NA | 0 | 0 | Not-determined | Genome-fragment | NA    | 0 |
| S3_k141_34551                                | 1769  | No | NA | 0 | 1 | Not-determined | Genome-fragment | NA    | 0 |
| S3_k141_109316                               | 1173  | No | NA | 0 | 1 | Not-determined | Genome-fragment | NA    | 0 |
| S9-final-viral-combined_k141_75255  full     | 1566  | No | NA | 1 | 0 | Low-quality    | Genome-fragment | 4     | 0 |
| S3_k141_74819                                | 1525  | No | NA | 0 | 1 | Not-determined | Genome-fragment | NA    | 0 |
| S3_k141_74833                                | 4070  | No | NA | 0 | 3 | Not-determined | Genome-fragment | NA    | 0 |
| S3_k141_11593                                | 9989  | No | NA | 0 | 0 | Not-determined | Genome-fragment | NA    | 0 |
| S11-final-viral-combined_k141_54761  full    | 1566  | No | NA | 1 | 0 | Low-quality    | Genome-fragment | 3.85  | 0 |
| S3_k141_97870                                | 1578  | No | NA | 0 | 0 | Not-determined | Genome-fragment | NA    | 0 |
| S3_k141_51860                                | 1019  | No | NA | 0 | 0 | Not-determined | Genome-fragment | NA    | 0 |
| S3_k141_155166                               | 2240  | No | NA | 0 | 0 | Not-determined | Genome-fragment | NA    | 0 |
| S1-final-viral-combined_k141_63465  full     | 1566  | No | NA | 0 | 2 | Low-quality    | Genome-fragment | 4.71  | 0 |
| S3_k141_69134                                | 1511  | No | NA | 0 | 1 | Not-determined | Genome-fragment | NA    | 0 |
| S3_k141_155184                               | 1000  | No | NA | 0 | 0 | Not-determined | Genome-fragment | NA    | 0 |
| S3-final-viral-combined_k141_102513  full    | 1566  | No | NA | 0 | 0 | Low-quality    | Genome-fragment | 2.92  | 0 |
| S3_k141_5887                                 | 3200  | No | NA | 0 | 1 | Not-determined | Genome-fragment | NA    | 0 |
| S3_k141_155210                               | 1377  | No | NA | 0 | 1 | Not-determined | Genome-fragment | NA    | 0 |
| S3_k141_92145                                | 1062  | No | NA | 0 | 0 | Not-determined | Genome-fragment | NA    | 0 |
| S3_k141_97925                                | 1751  | No | NA | 0 | 2 | Not-determined | Genome-fragment | NA    | 0 |
| S5-final-viral-combined_k141_87611  full     | 1566  | No | NA | 2 | 0 | Low-quality    | Genome-fragment | 4.16  | 0 |
| S3_k141_17410                                | 4723  | No | NA | 0 | 0 | Not-determined | Genome-fragment | NA    | 0 |
| S3_k141_132474                               | 1984  | No | NA | 0 | 0 | Not-determined | Genome-fragment | NA    | 0 |
| S3_k141_189852                               | 1566  | No | NA | 0 | 0 | Low-quality    | Genome-fragment | 1.3   | 0 |
| S2_k141_109483                               | 1211  | No | NA | 0 | 0 | Not-determined | Genome-fragment | NA    | 0 |
| S7-final-viral-combined_k141_162279  H2gene  | 1566  | No | NA | 0 | 0 | Low-quality    | Genome-fragment | 2.91  | 0 |
| S3_k141_103719                               | 1006  | No | NA | 0 | 1 | Not-determined | Genome-fragment | NA    | 0 |
| S2_k141_5983                                 | 1807  | No | NA | 0 | 2 | Not-determined | Genome-fragment | NA    | 0 |
| S12-final-viral-combined_k141_377957  full   | 1566  | No | NA | 0 | 1 | Low-quality    | Genome-fragment | 2.43  | 0 |
| S3_k141_115301                               | 1433  | No | NA | 0 | 1 | Not-determined | Genome-fragment | NA    | 0 |
| S3_k141_121038                               | 4885  | No | NA | 0 | 3 | Not-determined | Genome-fragment | NA    | 0 |
| S12-final-viral-combined_k141_46328  full    | 1566  | No | NA | 0 | 1 | Low-quality    | Genome-fragment | 0.46  | 0 |
| S3_k141_52022                                | 1631  | No | NA | 0 | 3 | Not-determined | Genome-fragment | NA    | 0 |
| S3_k141_92261                                | 1361  | No | NA | 0 | 1 | Not-determined | Genome-fragment | NA    | 0 |
| S3_k141_6093                                 | 1646  | No | NA | 0 | 1 | Not-determined | Genome-fragment | NA    | 0 |
| S3_k141_34785                                | 1338  | No | NA | 0 | 1 | Not-determined | Genome-fragment | NA    | 0 |
| S3_k141_92270                                | 1120  | No | NA | 0 | 0 | Not-determined | Genome-fragment | NA    | 0 |
| S12_k141_384057                              | 1566  | No | NA | 0 | 0 | Low-quality    | Genome-fragment | 2.72  | 0 |
| S3_k141_57705                                | 3428  | No | NA | 0 | 0 | Not-determined | Genome-fragment | NA    | 0 |
| S3_k141_103795                               | 1256  | No | NA | 0 | 0 | Not-determined | Genome-fragment | NA    | 0 |
| S4_k141_146218                               | 1566  | No | NA | 0 | 1 | Low-quality    | Genome-fragment | 3.17  | 0 |
| S3_k141_52108                                | 4798  | No | NA | 0 | 1 | Not-determined | Genome-fragment | NA    | 0 |
| S3_k141_86731                                | 1753  | No | NA | 0 | 0 | Not-determined | Genome-fragment | NA    | 0 |
| S3_k141_121908                               | 1216  | No | NA | 0 | 1 | Not-determined | Genome-fragment | NA    | 0 |
| S3_k141_109708                               | 3517  | No | NA | 0 | 1 | Not-determined | Genome-fragment | NA    | 0 |
| S3_k141_29070                                | 1370  | No | NA | 0 | 1 | Not-determined | Genome-fragment | NA    | 0 |
| S6-final-viral-combined_k141_42659  full     | 1566  | No | NA | 0 | 0 | Low-quality    | Genome-fragment | 1.95  | 0 |
| S1_k141_246302                               | 1567  | No | NA | 0 | 1 | Low-quality    | Genome-fragment | 4.01  | 0 |
| S3_k141_126943                               | 1258  | No | NA | 0 | 0 | Not-determined | Genome-fragment | NA    | 0 |
| S3_k141_98089                                | 1372  | No | NA | 0 | 0 | Not-determined | Genome-fragment | NA    | 0 |
| S3_k141_40612                                | 1868  | No | NA | 0 | 1 | Not-determined | Genome-fragment | NA    | 0 |
| S3_k141_17590                                | 1319  | No | NA | 0 | 0 | Not-determined | Genome-fragment | NA    | 0 |
| S3-final-viral-combined_k141_60968  full     | 1567  | No | NA | 0 | 2 | Low-quality    | Genome-fragment | 1.18  | 0 |
| S3_k141_11838                                | 1237  | No | NA | 0 | 2 | Not-determined | Genome-fragment | NA    | 0 |
| S3_k141_68442                                | 1648  | No | NA | 0 | 1 | Not-determined | Genome-fragment | NA    | 0 |
| S3_k141_23503                                | 1202  | No | NA | 0 | 0 | Not-determined | Genome-fragment | NA    | 0 |
| S5-final-viral-combined_k141_11866  H2gene   | 1567  | No | NA | 2 | 0 | Low-quality    | Genome-fragment | 4.63  | 0 |
| S3_k141_102941                               | 2904  | No | NA | 0 | 1 | Not-determined | Genome-fragment | NA    | 0 |
| S2_k141_192129                               | 1567  | No | NA | 0 | 1 | Low-quality    | Genome-fragment | 1.59  | 0 |
| S3_k141_63688                                | 1393  | No | NA | 0 | 0 | Not-determined | Genome-fragment | NA    | 0 |
| S3_k141_11882                                | 1145  | No | NA | 0 | 0 | Not-determined | Genome-fragment | NA    | 0 |
| S3_k141_56893                                | 1568  | No | NA | 2 | 0 | Low-quality    | Genome-fragment | 2.52  | 0 |
| S3_k141_63704                                | 3325  | No | NA | 0 | 3 | Not-determined | Genome-fragment | NA    | 0 |
| S3_k141_52215                                | 1638  | No | NA | 0 | 1 | Not-determined | Genome-fragment | NA    | 0 |
| S3_k141_52225                                | 1108  | No | NA | 0 | 1 | Not-determined | Genome-fragment | NA    | 0 |
| S3_k141_6283                                 | 3318  | No | NA | 0 | 1 | Not-determined | Genome-fragment | NA    | 0 |
| S3_k141_92530                                | 10075 | No | NA | 0 | 3 | Not-determined | Genome-fragment | NA    | 0 |
| S5-final-viral-combined_k141_30464  full     | 1568  | No | NA | 1 | 0 | Low-quality    | Genome-fragment | 3.5   | 0 |
| S3_k141_29207                                | 1054  | No | NA | 0 | 0 | Not-determined | Genome-fragment | NA    | 0 |
| S3_k141_40757                                | 1569  | No | NA | 0 | 1 | Not-determined | Genome-fragment | NA    | 0 |
| S3_k141_75231                                | 16346 | No | NA | 0 | 1 | Not-determined | Genome-fragment | NA    | 0 |
| S17-final-viral-combined_k141_235632  full   | 1568  | No | NA | 0 | 0 | Low-quality    | Genome-fragment | 2.79  | 0 |
| S3_k141_115604                               | 1422  | No | NA | 0 | 1 | Not-determined | Genome-fragment | NA    | 0 |
| S3_k141_627                                  | 1101  | No | NA | 0 | 0 | Not-determined | Genome-fragment | NA    | 0 |
| S2-final-viral-combined_k141_84876  H2gene   | 1568  | No | NA | 2 | 0 | Low-quality    | Genome-fragment | 3.16  | 0 |
| S4_k141_149556                               | 1568  | No | NA | 0 | 0 | Low-quality    | Genome-fragment | 2.95  | 0 |
| S3_k141_132903                               | 1455  | No | NA | 0 | 0 | Not-determined | Genome-fragment | NA    | 0 |
| S8-final-viral-combined_k141_3482  full      | 1568  | No | NA | 1 | 0 | Low-quality    | Genome-fragment | 2.81  | 0 |
| S9-final-viral-combined_k141_64108  H2gene   | 1569  | No | NA | 1 | 0 | Low-quality    | Genome-fragment | 3.49  | 0 |
| S3_k141_6415                                 | 1785  | No | NA | 0 | 1 | Not-determined | Genome-fragment | NA    | 0 |
| S3_k141_6426                                 | 1020  | No | NA | 0 | 0 | Not-determined | Genome-fragment | NA    | 0 |
| S3_k141_40886                                | 1006  | No | NA | 0 | 0 | Not-determined | Genome-fragment | NA    | 0 |
| S3_k141_12021                                | 1762  | No | NA | 0 | 2 | Not-determined | Genome-fragment | NA    | 0 |
| S3_k141_40900                                | 1124  | No | NA | 0 | 2 | Not-determined | Genome-fragment | NA    | 0 |
| S3_k141_66718                                | 1877  | No | NA | 0 | 1 | Not-determined | Genome          |       |   |



|                                      |          |       |     |      |    |   |                |                 |      |       |
|--------------------------------------|----------|-------|-----|------|----|---|----------------|-----------------|------|-------|
| S5-final-viral-combined_k141_157659  | [full]   | 1570  | No  | NA   | 1  | 0 | Low-quality    | Genome-fragment | 2.9  | 0     |
| S7_k141_225751                       |          | 1570  | No  | NA   | 0  | 0 | 1 Low-quality  | Genome-fragment | 1.68 | 0     |
| S3_k141_121584                       |          | 2204  | No  | NA   | 0  | 2 | Not-determined | Genome-fragment | NA   | 0     |
| S3_k141_115862                       |          | 2696  | No  | NA   | 0  | 3 | Not-determined | Genome-fragment | NA   | 0     |
| S3_k141_64149                        |          | 1103  | No  | NA   | 0  | 1 | Not-determined | Genome-fragment | NA   | 0     |
| S3_k141_127562                       |          | 2311  | No  | NA   | 0  | 1 | Not-determined | Genome-fragment | NA   | 0     |
| S3_k141_98484                        |          | 1104  | No  | NA   | 0  | 2 | Not-determined | Genome-fragment | NA   | 0     |
| S3_k141_29552                        |          | 1001  | No  | NA   | 0  | 1 | Not-determined | Genome-fragment | NA   | 0     |
| S3_k141_104436                       |          | 1212  | No  | NA   | 0  | 1 | Not-determined | Genome-fragment | NA   | 0     |
| S3_k141_29575                        |          | 2110  | No  | NA   | 0  | 0 | Not-determined | Genome-fragment | NA   | 0     |
| S3_k141_12247                        |          | 4745  | No  | NA   | 0  | 2 | Not-determined | Genome-fragment | NA   | 0     |
| S3_k141_23958                        |          | 35821 | No  | NA   | 16 | 1 | High-quality   | High-quality    | 100  | 0     |
| S3_k141_29610                        |          | 1533  | No  | NA   | 0  | 1 | Not-determined | Genome-fragment | NA   | 0     |
| S3_k141_29612                        |          | 2467  | No  | NA   | 0  | 0 | Not-determined | Genome-fragment | NA   | 0     |
| S3_k141_127631                       |          | 2706  | No  | NA   | 0  | 0 | Not-determined | Genome-fragment | NA   | 0     |
| S3_k141_6777                         |          | 1064  | No  | NA   | 0  | 1 | Not-determined | Genome-fragment | NA   | 0     |
| S3_k141_64225                        |          | 1306  | No  | NA   | 0  | 1 | Not-determined | Genome-fragment | NA   | 0     |
| S3_k141_115923                       |          | 1159  | No  | NA   | 0  | 1 | Not-determined | Genome-fragment | NA   | 0     |
| S6-final-viral-combined_k141_137910  | [H2gene] | 1570  | No  | NA   | 0  | 0 | Low-quality    | Genome-fragment | 2.67 | 0     |
| S8-final-viral-combined_k141_54836   | [full]   | 1570  | No  | NA   | 2  | 0 | Low-quality    | Genome-fragment | 2.26 | 0     |
| S3_k141_127654                       |          | 1635  | No  | NA   | 0  | 3 | Not-determined | Genome-fragment | NA   | 0     |
| S3_k141_1294                         |          | 4298  | No  | NA   | 0  | 1 | Not-determined | Genome-fragment | NA   | 0     |
| S3_k141_64262                        |          | 1387  | No  | NA   | 0  | 1 | Not-determined | Genome-fragment | NA   | 0     |
| S3_k141_115967                       |          | 2381  | No  | NA   | 0  | 1 | Not-determined | Genome-fragment | NA   | 0     |
| S3_k141_29652                        |          | 5399  | No  | NA   | 0  | 4 | Not-determined | Genome-fragment | NA   | 0     |
| S1-final-viral-combined_k141_36556   | [full]   | 1571  | No  | NA   | 1  | 0 | Low-quality    | Genome-fragment | 2.51 | 0     |
| S3_k141_29660                        |          | 3664  | No  | NA   | 0  | 3 | Not-determined | Genome-fragment | NA   | 0     |
| S3_k141_52820                        |          | 1572  | No  | NA   | 0  | 0 | Not-determined | Genome-fragment | NA   | 0     |
| S3_k141_93007                        |          | 1291  | No  | NA   | 0  | 0 | Not-determined | Genome-fragment | NA   | 0     |
| S5-final-viral-combined_k141_32936   | [full]   | 1571  | No  | NA   | 0  | 0 | Low-quality    | Genome-fragment | 3.31 | 0     |
| S3_k141_81594                        |          | 1085  | No  | NA   | 0  | 0 | Not-determined | Genome-fragment | NA   | 0     |
| S5-final-viral-combined_k141_122754  | [full]   | 1571  | Yes | 1091 | 0  | 1 | Low-quality    | Genome-fragment | 2.45 | 30.55 |
| S3_k141_1167                         |          | 3130  | No  | NA   | 0  | 3 | Not-determined | Genome-fragment | NA   | 0     |
| S7-final-viral-combined_k141_114092  | [full]   | 1571  | No  | NA   | 0  | 0 | Low-quality    | Genome-fragment | 3.3  | 0     |
| S17-final-viral-combined_k141_43559  | [full]   | 1571  | No  | NA   | 0  | 2 | Low-quality    | Genome-fragment | 0.51 | 0     |
| S3_k141_24060                        |          | 1177  | No  | NA   | 0  | 0 | Not-determined | Genome-fragment | NA   | 0     |
| S3_k141_133371                       |          | 1225  | No  | NA   | 0  | 0 | Not-determined | Genome-fragment | NA   | 0     |
| S12-final-viral-combined_k141_326159 | [full]   | 1571  | No  | NA   | 1  | 0 | Low-quality    | Genome-fragment | 2.33 | 0     |
| S3_k141_81652                        |          | 1077  | No  | NA   | 0  | 1 | Not-determined | Genome-fragment | NA   | 0     |
| S4-final-viral-combined_k141_30088   | [full]   | 1571  | No  | NA   | 0  | 0 | Low-quality    | Genome-fragment | 2.94 | 0     |
| S3_k141_93066                        |          | 1022  | No  | NA   | 0  | 1 | Not-determined | Genome-fragment | NA   | 0     |
| S8_k141_254010                       |          | 1571  | No  | NA   | 1  | 0 | Low-quality    | Genome-fragment | 3.83 | 0     |
| S8_k141_185532                       |          | 1571  | No  | NA   | 0  | 1 | Low-quality    | Genome-fragment | 3.38 | 0     |
| S9-final-viral-combined_k141_100073  | [full]   | 1572  | No  | NA   | 2  | 0 | Low-quality    | Genome-fragment | 2.96 | 0     |
| S3_k141_127785                       |          | 1126  | No  | NA   | 0  | 1 | Not-determined | Genome-fragment | NA   | 0     |
| S11-final-viral-combined_k141_191295 | [full]   | 1572  | No  | NA   | 0  | 1 | Low-quality    | Genome-fragment | 5.02 | 0     |
| S11_k141_32112                       |          | 1572  | No  | NA   | 0  | 1 | Low-quality    | Genome-fragment | 2.77 | 0     |
| S11_k141_20883                       |          | 1572  | No  | NA   | 0  | 1 | Low-quality    | Genome-fragment | 0.59 | 0     |
| S7-final-viral-combined_k141_207044  | [H2gene] | 1572  | No  | NA   | 1  | 0 | Low-quality    | Genome-fragment | 3.19 | 0     |
| S2-final-viral-combined_k141_199927  | [full]   | 1572  | No  | NA   | 0  | 0 | Low-quality    | Genome-fragment | 2.28 | 0     |
| S3_k141_41372                        |          | 1279  | No  | NA   | 0  | 0 | Not-determined | Genome-fragment | NA   | 0     |
| S3_k141_18294                        |          | 2355  | No  | NA   | 0  | 4 | Not-determined | Genome-fragment | NA   | 0     |
| S3_k141_41405                        |          | 5120  | No  | NA   | 0  | 5 | Not-determined | Genome-fragment | NA   | 0     |
| S3_k141_81776                        |          | 1161  | No  | NA   | 0  | 1 | Not-determined | Genome-fragment | NA   | 0     |
| S3_k141_127911                       |          | 1111  | No  | NA   | 0  | 1 | Not-determined | Genome-fragment | NA   | 0     |
| S3_k141_24168                        |          | 1116  | No  | NA   | 0  | 1 | Not-determined | Genome-fragment | NA   | 0     |
| S3_k141_1287                         |          | 2131  | No  | NA   | 0  | 1 | Not-determined | Genome-fragment | NA   | 0     |
| S3_k141_133549                       |          | 1014  | No  | NA   | 0  | 1 | Not-determined | Genome-fragment | NA   | 0     |
| S6_k141_134207                       |          | 1572  | No  | NA   | 0  | 0 | Low-quality    | Genome-fragment | 1.54 | 0     |
| S3_k141_58779                        |          | 1544  | No  | NA   | 0  | 2 | Not-determined | Genome-fragment | NA   | 0     |
| S3_k141_64551                        |          | 1186  | No  | NA   | 0  | 0 | Not-determined | Genome-fragment | NA   | 0     |
| S9-final-viral-combined_k141_109774  | [full]   | 1573  | No  | NA   | 0  | 1 | Low-quality    | Genome-fragment | 1.8  | 0     |
| S11-final-viral-combined_k141_16717  | [full]   | 1573  | No  | NA   | 3  | 0 | Low-quality    | Genome-fragment | 3.93 | 0     |
| S3_k141_47371                        |          | 2805  | No  | NA   | 0  | 0 | Not-determined | Genome-fragment | NA   | 0     |
| S3_k141_58798                        |          | 1229  | No  | NA   | 0  | 0 | Not-determined | Genome-fragment | NA   | 0     |
| S11-final-viral-combined_k141_228759 | [full]   | 1573  | No  | NA   | 0  | 1 | Low-quality    | Genome-fragment | 2.55 | 0     |
| S3_k141_98812                        |          | 4551  | No  | NA   | 0  | 4 | Not-determined | Genome-fragment | NA   | 0     |
| S3_k141_64569                        |          | 3619  | No  | NA   | 0  | 0 | Not-determined | Genome-fragment | NA   | 0     |
| S1-final-viral-combined_k141_287212  | [full]   | 1573  | No  | NA   | 0  | 0 | Low-quality    | Genome-fragment | 2.92 | 0     |
| S3_k141_47405                        |          | 1165  | No  | NA   | 0  | 0 | Not-determined | Genome-fragment | NA   | 0     |
| S3_k141_35781                        |          | 3057  | No  | NA   | 0  | 4 | Not-determined | Genome-fragment | NA   | 0     |
| S3_k141_122020                       |          | 2062  | No  | NA   | 0  | 1 | Not-determined | Genome-fragment | NA   | 0     |
| S5_k141_163787                       |          | 1573  | No  | NA   | 0  | 0 | Low-quality    | Genome-fragment | 0.99 | 0     |
| S3_k141_41563                        |          | 1296  | No  | NA   | 0  | 1 | Not-determined | Genome-fragment | NA   | 0     |
| S3_k141_58893                        |          | 1105  | No  | NA   | 0  | 0 | Not-determined | Genome-fragment | NA   | 0     |
| S12_k141_389423                      |          | 1573  | No  | NA   | 1  | 0 | Low-quality    | Genome-fragment | 1.08 | 0     |
| S2-final-viral-combined_k141_183777  | [full]   | 1573  | No  | NA   | 0  | 2 | Low-quality    | Genome-fragment | 2.98 | 0     |
| S3_k141_128132                       |          | 1019  | No  | NA   | 0  | 0 | Not-determined | Genome-fragment | NA   | 0     |
| S3_k141_64653                        |          | 1048  | No  | NA   | 0  | 1 | Not-determined | Genome-fragment | NA   | 0     |
| S3_k141_128142                       |          | 1692  | No  | NA   | 0  | 1 | Not-determined | Genome-fragment | NA   | 0     |
| S3_k141_87839                        |          | 1174  | No  | NA   | 0  | 0 | Not-determined | Genome-fragment | NA   | 0     |
| S3_k141_110682                       |          | 1051  | No  | NA   | 0  | 1 | Not-determined | Genome-fragment | NA   | 0     |
| S3_k141_122136                       |          | 1059  | No  | NA   | 0  | 1 | Not-determined | Genome-fragment | NA   | 0     |
| S2-final-viral-combined_k141_153862  | [full]   | 1573  | No  | NA   | 0  | 1 | Low-quality    | Genome-fragment | 3.44 | 0     |
| S3_k141_87903                        |          | 1584  | No  | NA   | 0  | 1 | Not-determined | Genome-fragment | NA   | 0     |
| S4-final-viral-combined_k141_119041  | [full]   | 1573  | No  | NA   | 0  | 0 | Low-quality    | Genome-fragment | 1.88 | 0     |
| S3_k141_110746                       |          | 3111  | No  | NA   | 0  | 1 | Not-determined | Genome-fragment | NA   | 0     |
| S3_k141_104931                       |          | 1083  | No  | NA   | 0  | 2 | Not-determined | Genome-fragment | NA   | 0     |
| S11-final-viral-combined_k141_214808 | [full]   | 1574  | No  | NA   | 2  | 0 | Low-quality    | Genome-fragment | 1.93 | 0     |
| S3_k141_59007                        |          | 1123  | No  | NA   | 0  | 1 | Not-determined | Genome-fragment | NA   | 0     |
| S3_k141_116595                       |          | 1375  | No  | NA   | 0  | 1 | Not-determined | Genome-fragment | NA   | 0     |
| S3_k141_116623                       |          | 1802  | No  | NA   | 0  | 0 | Not-determined | Genome-fragment | NA   | 0     |
| S3_k141_76270                        |          | 4544  | No  | NA   | 0  | 1 | Not-determined | Genome-fragment | NA   | 0     |
| S3_k141_110779                       |          | 1012  | No  | NA   | 0  | 0 | Not-determined | Genome-fragment | NA   | 0     |
| S3_k141_35979                        |          | 1262  | No  | NA   | 0  | 0 | Not-determined | Genome-fragment | NA   | 0     |
| S1-final-viral-combined_k141_197653  | [full]   | 1574  | No  | NA   | 0  | 0 | Low-quality    | Genome-fragment | 3.24 | 0     |
| S3_k141_110802                       |          | 1157  | No  | NA   | 0  | 0 | Not-determined | Genome-fragment | NA   | 0     |
| S3_k141_44066                        |          | 1574  | No  | NA   | 0  | 1 | Low-quality    | Genome-fragment | 3.07 | 0     |
| S3_k141_76124                        |          | 1307  | No  | NA   | 0  | 0 | Not-determined | Genome-fragment | NA   | 0     |
| S3_k141_133904                       |          | 1932  | No  | NA   | 0  | 1 | Not-determined | Genome-fragment | NA   | 0     |
| S3_k141_41771                        |          | 1308  | No  | NA   | 0  | 1 | Not-determined | Genome-fragment | NA   | 0     |
| S3_k141_70563                        |          | 1519  | No  | NA   | 0  | 1 | Not-determined | Genome-fragment | NA   | 0     |
| S7_k141_29582                        |          | 1574  | No  | NA   | 0  | 2 | Low-quality    | Genome-fragment | 0.43 | 0     |
| S17-final-viral-combined_k141_218889 | [full]   | 1574  | No  | NA   | 0  | 0 | Low-quality    | Genome-fragment | 1.92 | 0     |
| S3_k141_53447                        |          | 5286  | No  | NA   | 0  | 1 | Not-determined | Genome-fragment | NA   | 0     |
| S12-final-viral-combined_k141_124531 | [full]   | 1574  | No  | NA   | 1  | 0 | Low-quality    | Genome-fragment | 3.23 | 0     |
| S3_k141_30208                        |          | 1021  | No  | NA   | 0  | 2 | Not-determined | Genome-fragment | NA   | 0     |
| S3_k141_122303                       |          | 1479  | No  | NA   | 0  | 1 | Not-determined | Genome-fragment | NA   | 0     |
| S3_k141_88046                        |          | 1070  | No  | NA   | 0  | 2 | Not-determined | Genome-fragment | NA   | 0     |
| S12-final-viral-combined_k141_131825 | [full]   | 1574  | No  | NA   | 1  | 0 | Low-quality    | Genome-fragment | 4.06 | 0     |
| S3_k141_76357                        |          | 1067  | No  | NA   | 0  | 1 | Not-determined | Genome-fragment | NA   | 0     |
| S3_k141_30135                        |          | 1655  | No  | NA   | 0  | 1 | Not-determined | Genome-fragment | NA   | 0     |
| S12-final-viral-combined_k141_268839 | [H2gene] | 1574  | No  | NA   | 1  | 0 | Low-quality    | Genome-fragment | 0.84 | 0     |
| S3_k141_53471                        |          | 1076  | No  | NA   | 0  | 1 | Not-determined | Genome-fragment | NA   | 0     |
| S3_k141_70649                        |          | 1669  | No  | NA   | 0  | 0 | Not-determined | Genome-fragment | NA   | 0     |
| S3_k141_59200                        |          | 3176  | No  | NA   | 0  | 1 | Not-determined | Genome-fragment | NA   | 0     |
| S3_k141_64967                        |          | 1553  | No  | NA   | 0  | 1 | Not-determined | Genome-fragment | NA   | 0     |
| S3_k141_88083                        |          | 1447  | No  | NA   | 0  | 0 | Not-determined | Genome-fragment | NA   | 0     |
| S3_k141_110955                       |          | 6631  | No  | NA   | 0  | 0 | Not-determined | Genome-fragment | NA   | 0     |
| S3_k141_53482                        |          | 1099  | No  | NA   | 0  | 0 | Not-determined | Genome-fragment | NA   | 0     |
| S2-final-viral-combined_k141_16826   | [full]   | 1574  | No  | NA   | 0  | 1 | Low-quality    | Genome-fragment | 1.07 | 0     |
| S3_k141_122400                       |          | 1094  | No  | NA   | 0  | 0 | Not-determined | Genome-fragment | NA   | 0     |
| S3_k141_24699                        |          | 1195  | No  | NA   | 0  | 1 | Not-determined | Genome-fragment | NA   | 0     |
| S11-final-viral-combined_k141_51704  | [full]   | 1575  | No  | NA   | 1  | 0 | Low-quality    | Genome-fragment | 1.05 | 0     |
| S6-final-viral-combined_k141_137979  | [full]   | 1575  | No  | NA   | 0  | 1 | Low-quality    | Genome-fragment | 0.84 | 0     |
| S17-final-viral-combined_k141_184484 | [full]   | 1575  | No  | NA   | 0  | 2 | Low-quality    | Genome-fragment | 1.89 | 0     |
| S3_k141_18874                        |          | 1461  | No  | NA   | 0  | 2 | Not-determined | Genome-fragment | NA   | 0     |
| S12-final-viral-combined_k141_212597 | [full]   | 1575  | No  | NA   | 0  | 1 | Low-quality    | Genome-fragment | 2.44 | 0     |
| S3_k141_116380                       |          | 5745  | No  | NA   | 0  | 6 | Not-determined | Genome-fragment | NA   | 0     |
| S3_k141_99207                        |          | 1156  | No  | NA   | 0  | 0 | Not-determined | Genome-fragment | NA   | 0     |
| S3_k141_59247                        |          | 3878  | No  | NA   | 0  | 0 | Not-determined | Genome-fragment | NA   | 0     |
| S3_k141_138509                       |          | 1203  | No  | NA   | 0  | 0 | Not-determined | Genome-fragment | NA   | 0     |
| S3_k141_82388                        |          | 1235  | No  | NA   | 0  | 0 | Not-determined | Genome-fragment | NA   | 0     |
| S3_k141_47863                        |          | 4298  | No  | NA   | 0  | 1 | Not-determined | Genome-fragment | NA   | 0     |
| S2-final-viral-combined_k141_115107  | [full]   | 1575  | No  | NA   | 0  | 0 | Low-quality    | Genome-fragment | 4.32 | 0     |
| S3_k141_76503                        |          | 1318  | No  | NA   | 0  | 1 | Not-determined | Genome-fragment | NA   | 0     |
| S3_k141_30405                        |          | 3030  | No  | NA   | 0  | 0 | Not-determined | Genome-fragment | NA   | 0     |
| S2-final-viral-combined_k141_84683   | [full]   | 1575  | No  | NA   | 0  | 0 | Low-quality    | Genome-fragment | 3.81 | 0     |
| S3_k141_13165                        |          | 2008  | No  | NA   |    |   |                |                 |      |       |



|                                              |       |     |    |     |   |                |                 |                 |       |
|----------------------------------------------|-------|-----|----|-----|---|----------------|-----------------|-----------------|-------|
| S3_k141_13416                                | 1561  | No  | NA | 0   | 1 | Not-determined | Genome-fragment | NA              | 0     |
| S3_k141_105181                               | 2110  | No  | NA | 0   | 1 | Not-determined | Genome-fragment | NA              | 0     |
| S2-final-viral-combined_k141_145792  full    | 1576  | No  | NA | 0   | 1 | Low-quality    | Genome-fragment | NA              | 0.82  |
| S2-final-viral-combined_k141_178529  full    | 1576  | No  | NA | 3   | 0 | Low-quality    | Genome-fragment | NA              | 3.08  |
| S3_k141_88417                                | 1460  | No  | NA | 0   | 0 | Not-determined | Genome-fragment | NA              | 0     |
| S9_k141_80400                                | 1577  | No  | NA | 0   | 0 | Low-quality    | Genome-fragment | NA              | 3.11  |
| S11-final-viral-combined_k141_24585  full    | 1577  | No  | NA | 0   | 1 | Low-quality    | Genome-fragment | NA              | 1.08  |
| S5-final-viral-combined_k141_189638  full    | 1577  | No  | NA | 0   | 0 | Low-quality    | Genome-fragment | NA              | 3.72  |
| S5-final-viral-combined_k141_128392  full    | 1577  | No  | NA | 1   | 0 | Low-quality    | Genome-fragment | NA              | 2.58  |
| S3_k141_7764                                 | 3074  | No  | NA | 0   | 3 | Not-determined | Genome-fragment | NA              | 0     |
| S3_k141_48208                                | 1886  | No  | NA | 0   | 1 | Not-determined | Genome-fragment | NA              | 0     |
| S3_k141_128840                               | 1175  | No  | NA | 0   | 1 | Not-determined | Genome-fragment | NA              | 0     |
| S3_k141_99564                                | 1066  | No  | NA | 0   | 0 | Not-determined | Genome-fragment | NA              | 0     |
| S3_k141_59641                                | 4084  | No  | NA | 0   | 2 | Not-determined | Genome-fragment | NA              | 0     |
| S3_k141_48220                                | 1148  | No  | NA | 0   | 0 | Not-determined | Genome-fragment | NA              | 0     |
| S3_k141_88547                                | 1278  | No  | NA | 0   | 0 | Not-determined | Genome-fragment | NA              | 0     |
| S3_k141_94181                                | 1021  | No  | NA | 0   | 0 | Not-determined | Genome-fragment | NA              | 0     |
| S3_k141_94186                                | 4141  | No  | NA | 0   | 3 | Not-determined | Genome-fragment | NA              | 0     |
| S5-final-viral-combined_k141_110412  full    | 1577  | No  | NA | 0   | 1 | Low-quality    | Genome-fragment | NA              | 2.29  |
| S9_k141_25220                                | 1201  | No  | NA | 0   | 1 | Not-determined | Genome-fragment | NA              | 0     |
| S3_k141_99649                                | 1226  | No  | NA | 0   | 1 | Not-determined | Genome-fragment | NA              | 0     |
| S3_k141_111375                               | 1189  | No  | NA | 0   | 0 | Not-determined | Genome-fragment | NA              | 0     |
| S9_k141_82810                                | 6353  | No  | NA | 0   | 3 | Not-determined | Genome-fragment | NA              | 0     |
| S5_k141_10299                                | 1577  | No  | NA | 0   | 1 | Low-quality    | Genome-fragment | NA              | 1.99  |
| S17-final-viral-combined_k141_48836  full    | 1577  | Yes | NA | 764 | 1 | 1              | Low-quality     | Genome-fragment | 1.63  |
| S17-k141_63366                               | 1577  | No  | NA | 0   | 1 | Low-quality    | Genome-fragment | NA              | 1.12  |
| S3_k141_19400                                | 1011  | No  | NA | 0   | 0 | Not-determined | Genome-fragment | NA              | 0     |
| S12_k141_155889                              | 1577  | No  | NA | 0   | 1 | Low-quality    | Genome-fragment | NA              | 1.12  |
| S3_k141_10862                                | 1023  | No  | NA | 0   | 0 | Not-determined | Genome-fragment | NA              | 0     |
| S2-final-viral-combined_k141_108998  full    | 1577  | No  | NA | 0   | 2 | Low-quality    | Genome-fragment | NA              | 3.6   |
| S3_k141_88675                                | 1151  | No  | NA | 0   | 1 | Not-determined | Genome-fragment | NA              | 0     |
| S3_k141_134426                               | 2819  | No  | NA | 0   | 3 | Not-determined | Genome-fragment | NA              | 0     |
| S2-final-viral-combined_k141_154822  full    | 1577  | No  | NA | 1   | 0 | Low-quality    | Genome-fragment | NA              | 2.64  |
| S3_k141_105784                               | 1176  | No  | NA | 0   | 1 | Not-determined | Genome-fragment | NA              | 0     |
| S8-final-viral-combined_k141_190742  full    | 1577  | No  | NA | 2   | 0 | Low-quality    | Genome-fragment | NA              | 3.21  |
| S1-final-viral-combined_k141_164968  full    | 1578  | No  | NA | 0   | 0 | Low-quality    | Genome-fragment | NA              | 2.52  |
| S5-final-viral-combined_k141_9937  full      | 1578  | No  | NA | 0   | 2 | Low-quality    | Genome-fragment | NA              | 2.41  |
| S3_k141_129009                               | 4663  | No  | NA | 0   | 4 | Not-determined | Genome-fragment | NA              | 0     |
| S17-final-viral-combined_k141_95043  full    | 1578  | No  | NA | 1   | 0 | Low-quality    | Genome-fragment | NA              | 4.04  |
| S3_k141_2461                                 | 1114  | No  | NA | 0   | 1 | Not-determined | Genome-fragment | NA              | 0     |
| S3_k141_2464                                 | 1161  | No  | NA | 0   | 0 | Not-determined | Genome-fragment | NA              | 0     |
| S3_k141_71341                                | 1170  | No  | NA | 0   | 1 | Not-determined | Genome-fragment | NA              | 0     |
| S9_k141_59793                                | 1032  | No  | NA | 0   | 1 | Not-determined | Genome-fragment | NA              | 0     |
| S3_k141_2480                                 | 1365  | No  | NA | 0   | 2 | Not-determined | Genome-fragment | NA              | 0     |
| S2_k141_36813                                | 1035  | No  | NA | 0   | 1 | Not-determined | Genome-fragment | NA              | 0     |
| S12_k141_207771                              | 1578  | No  | NA | 0   | 0 | Low-quality    | Genome-fragment | NA              | 1.59  |
| S3_k141_88816                                | 1851  | No  | NA | 0   | 1 | Not-determined | Genome-fragment | NA              | 0     |
| S11-final-viral-combined_k141_241601  full   | 1579  | No  | NA | 2   | 0 | Low-quality    | Genome-fragment | NA              | 2.29  |
| S3_k141_134751                               | 10232 | No  | NA | 0   | 3 | Not-determined | Genome-fragment | NA              | 0     |
| S3_k141_83024                                | 4362  | No  | NA | 0   | 2 | Not-determined | Genome-fragment | NA              | 0     |
| S11_k141_219903                              | 1579  | No  | NA | 0   | 0 | Low-quality    | Genome-fragment | NA              | 2.15  |
| S2_k141_88818                                | 1508  | No  | NA | 0   | 0 | Not-determined | Genome-fragment | NA              | 0     |
| S9_k141_105878                               | 1216  | No  | NA | 0   | 1 | Not-determined | Genome-fragment | NA              | 0     |
| S3_k141_8065                                 | 4506  | No  | NA | 0   | 6 | Not-determined | Genome-fragment | NA              | 0     |
| S2_k141_99925                                | 1042  | No  | NA | 0   | 0 | Not-determined | Genome-fragment | NA              | 0     |
| S2_k141_83275                                | 1579  | No  | NA | 1   | 0 | Low-quality    | Genome-fragment | NA              | 0.92  |
| S9_k141_111706                               | 1059  | No  | NA | 0   | 0 | Not-determined | Genome-fragment | NA              | 0     |
| S3_k141_77161                                | 5208  | No  | NA | 0   | 4 | Not-determined | Genome-fragment | NA              | 0     |
| S3_k141_83097                                | 1114  | No  | NA | 0   | 0 | Not-determined | Genome-fragment | NA              | 0     |
| S3_k141_94472                                | 1132  | No  | NA | 0   | 0 | Not-determined | Genome-fragment | NA              | 0     |
| S11-final-viral-combined_k141_126907  full   | 1580  | No  | NA | 0   | 0 | Low-quality    | Genome-fragment | NA              | 2.78  |
| S11_k141_182451                              | 1580  | No  | NA | 0   | 0 | Low-quality    | Genome-fragment | NA              | 2.07  |
| S7-final-viral-combined_k141_139510  full    | 1580  | No  | NA | 0   | 0 | Low-quality    | Genome-fragment | NA              | 3.63  |
| S17-final-viral-combined_k141_232699  full   | 1580  | No  | NA | 0   | 1 | Low-quality    | Genome-fragment | NA              | 1.08  |
| S3_k141_94494                                | 20415 | No  | NA | 14  | 0 | Medium-quality | Genome-fragment | NA              | 50.86 |
| S3_k141_19691                                | 2456  | No  | NA | 0   | 1 | Not-determined | Genome-fragment | NA              | 0     |
| S3_k141_48589                                | 1309  | No  | NA | 0   | 1 | Not-determined | Genome-fragment | NA              | 0     |
| S12-final-viral-combined_k141_87694  full    | 1580  | No  | NA | 0   | 1 | Low-quality    | Genome-fragment | NA              | 1     |
| S3_k141_120243                               | 4218  | No  | NA | 0   | 0 | Not-determined | Genome-fragment | NA              | 0     |
| S12-final-viral-combined_k141_310471  full   | 1580  | No  | NA | 3   | 0 | Low-quality    | Genome-fragment | NA              | 4.91  |
| S2-final-viral-combined_k141_14260  full     | 1580  | No  | NA | 0   | 0 | Low-quality    | Genome-fragment | NA              | 3.1   |
| S3_k141_88976                                | 2780  | No  | NA | 0   | 0 | Not-determined | Genome-fragment | NA              | 0     |
| S3_k141_123301                               | 1571  | No  | NA | 0   | 1 | Not-determined | Genome-fragment | NA              | 0     |
| S3_k141_129258                               | 3936  | No  | NA | 0   | 0 | Not-determined | Genome-fragment | NA              | 0     |
| S2-final-viral-combined_k141_91384  full     | 1580  | No  | NA | 0   | 0 | Low-quality    | Genome-fragment | NA              | 3.75  |
| S2-final-viral-combined_k141_82115  full     | 1580  | No  | NA | 1   | 0 | Low-quality    | Genome-fragment | NA              | 4.19  |
| S3_k141_31218                                | 1212  | No  | NA | 0   | 1 | Not-determined | Genome-fragment | NA              | 0     |
| S9-final-viral-combined_k141_58944  full     | 1581  | No  | NA | 0   | 1 | Low-quality    | Genome-fragment | NA              | 4.13  |
| S3_k141_2717                                 | 3649  | No  | NA | 0   | 1 | Not-determined | Genome-fragment | NA              | 0     |
| S3_k141_111831                               | 1194  | No  | NA | 0   | 1 | Not-determined | Genome-fragment | NA              | 0     |
| S3_k141_117664                               | 1480  | No  | NA | 0   | 5 | Not-determined | Genome-fragment | NA              | 0     |
| S3_k141_25608                                | 1346  | No  | NA | 0   | 0 | Not-determined | Genome-fragment | NA              | 0     |
| S3_k141_19793                                | 1037  | No  | NA | 0   | 0 | Not-determined | Genome-fragment | NA              | 0     |
| S11-final-viral-combined_k141_7556  full     | 1581  | No  | NA | 0   | 1 | Low-quality    | Genome-fragment | NA              | 1.55  |
| S3_k141_106058                               | 2227  | No  | NA | 0   | 1 | Not-determined | Genome-fragment | NA              | 0     |
| S9_k141_54310                                | 1643  | No  | NA | 0   | 0 | Not-determined | Genome-fragment | NA              | 0     |
| S3_k141_94665                                | 1147  | No  | NA | 0   | 0 | Not-determined | Genome-fragment | NA              | 0     |
| S5-final-viral-combined_k141_137513  H2gene  | 1581  | No  | NA | 1   | 0 | Low-quality    | Genome-fragment | NA              | 2.54  |
| S3_k141_111919                               | 6667  | No  | NA | 0   | 1 | Not-determined | Genome-fragment | NA              | 0     |
| S3_k141_13964                                | 1547  | No  | NA | 0   | 0 | Not-determined | Genome-fragment | NA              | 0     |
| S3_k141_77384                                | 1281  | No  | NA | 0   | 1 | Not-determined | Genome-fragment | NA              | 3.69  |
| S5_k141_59631                                | 1581  | No  | NA | 0   | 0 | Low-quality    | Genome-fragment | NA              | 4.24  |
| S7-final-viral-combined_k141_236851  full    | 1581  | No  | NA | 1   | 0 | Low-quality    | Genome-fragment | NA              | 0     |
| S3_k141_25730                                | 1549  | No  | NA | 0   | 0 | Not-determined | Genome-fragment | NA              | 2.35  |
| S7-final-viral-combined_k141_74071  full     | 1581  | No  | NA | 1   | 0 | Low-quality    | Genome-fragment | NA              | 0     |
| S9_k141_117746                               | 1080  | No  | NA | 0   | 0 | Not-determined | Genome-fragment | NA              | 0     |
| S3_k141_83373                                | 2129  | No  | NA | 0   | 1 | Not-determined | Genome-fragment | NA              | 0     |
| S3_k141_117766                               | 1089  | No  | NA | 0   | 0 | Not-determined | Genome-fragment | NA              | 0     |
| S3_k141_77417                                | 1866  | No  | NA | 0   | 1 | Not-determined | Genome-fragment | NA              | 0     |
| S3_k141_100214                               | 1776  | No  | NA | 0   | 1 | Not-determined | Genome-fragment | NA              | 0     |
| S3_k141_135047                               | 1004  | No  | NA | 0   | 2 | Not-determined | Genome-fragment | NA              | 0     |
| S3_k141_31426                                | 1488  | No  | NA | 0   | 1 | Not-determined | Genome-fragment | NA              | 0     |
| S3_k141_2891                                 | 1125  | No  | NA | 0   | 0 | Not-determined | Genome-fragment | NA              | 0     |
| S3_k141_31434                                | 1316  | No  | NA | 0   | 1 | Not-determined | Genome-fragment | NA              | 0     |
| S7-final-viral-combined_k141_167809  full    | 1581  | No  | NA | 0   | 0 | Low-quality    | Genome-fragment | NA              | 3.35  |
| S12-final-viral-combined_k141_261501  full   | 1581  | No  | NA | 0   | 1 | Low-quality    | Genome-fragment | NA              | 1.05  |
| S2-final-viral-combined_k141_181101  full    | 1581  | No  | NA | 0   | 1 | Low-quality    | Genome-fragment | NA              | 1.52  |
| S3_k141_31450                                | 3328  | No  | NA | 0   | 0 | Not-determined | Genome-fragment | NA              | 0     |
| S3_k141_8349                                 | 1740  | No  | NA | 0   | 4 | Not-determined | Genome-fragment | NA              | 0     |
| S3_k141_83422                                | 3689  | No  | NA | 0   | 4 | Not-determined | Genome-fragment | NA              | 0     |
| S3_k141_65955                                | 1067  | No  | NA | 0   | 2 | Not-determined | Genome-fragment | NA              | 0     |
| S3_k141_83429                                | 1744  | No  | NA | 0   | 0 | Not-determined | Genome-fragment | NA              | 0     |
| S3_k141_42941                                | 2217  | No  | NA | 0   | 1 | Not-determined | Genome-fragment | NA              | 0     |
| S3_k141_83466                                | 1047  | No  | NA | 0   | 0 | Not-determined | Genome-fragment | NA              | 0     |
| S11-final-viral-combined_k141_323234  full   | 1582  | No  | NA | 0   | 1 | Low-quality    | Genome-fragment | NA              | 1.27  |
| S9_k141_37355                                | 1797  | No  | NA | 0   | 0 | Not-determined | Genome-fragment | NA              | 0     |
| S3_k141_3029                                 | 1585  | No  | NA | 0   | 0 | Not-determined | Genome-fragment | NA              | 0     |
| S11-final-viral-combined_k141_137342  H2gene | 1582  | No  | NA | 1   | 0 | Low-quality    | Genome-fragment | NA              | 3.6   |
| S3_k141_60340                                | 1204  | No  | NA | 0   | 1 | Not-determined | Genome-fragment | NA              | 0     |
| S1-final-viral-combined_k141_334552  full    | 1582  | No  | NA | 0   | 0 | Low-quality    | Genome-fragment | NA              | 2.9   |
| S17-final-viral-combined_k141_139703  full   | 1582  | No  | NA | 0   | 1 | Low-quality    | Genome-fragment | NA              | 0.53  |
| S17-final-viral-combined_k141_116802  H2gene | 1582  | No  | NA | 0   | 0 | Low-quality    | Genome-fragment | NA              | 3.49  |
| S3_k141_2012                                 | 1032  | No  | NA | 0   | 1 | Not-determined | Genome-fragment | NA              | 0     |
| S3_k141_20111                                | 1124  | No  | NA | 0   | 0 | Not-determined | Genome-fragment | NA              | 0     |
| S3_k141_94944                                | 1117  | No  | NA | 0   | 1 | Not-determined | Genome-fragment | NA              | 0     |
| S12-final-viral-combined_k141_323779  H2gene | 1582  | No  | NA | 1   | 0 | Low-quality    | Genome-fragment | NA              | 2.94  |
| S3_k141_48892                                | 12703 | No  | NA | 0   | 8 | Not-determined | Genome-fragment | NA              | 0     |
| S2_k141_141584                               | 1582  | No  | NA | 0   | 0 | Low-quality    | Genome-fragment | NA              | 0     |
| S3_k141_48897                                | 1732  | No  | NA | 0   | 0 | Not-determined | Genome-fragment | NA              | 2     |
| S3_k141_14184                                | 3945  | No  | NA | 0   | 0 | Not-determined | Genome-fragment | NA              | 1.17  |
| S3_k141_150017                               | 1582  | No  | NA | 3   | 0 | Low-quality    | Genome-fragment | NA              | 3.62  |
| S8-final-viral-combined_k141_162761  H2gene  | 1582  | No  | NA | 1   | 0 | Low-quality    | Genome-fragment | NA              | 0     |
| S3_k141_3169                                 | 1957  | No  | NA | 0   | 2 | Not-determined | Genome-fragment | NA              | 0     |
| S1-final-viral-combined_k141_74413  full     | 1583  | No  | NA | 0   | 0 | Low-quality    | Genome-fragment | NA              | 2.85  |
| S3_k141_112191                               | 1660  | No  | NA | 0   | 2 | Not-determined | Genome-fragment | NA              | 0     |
| S3_k141_89400                                | 1057  | No  | NA | 0   | 1 | Not-determined | Genome-fragment | NA              | 0     |
| S1-final-viral-combined_k141_389765  H2gene  | 1583  | No  | NA | 1   | 0 | Low-quality    | Genome-fragment | NA              | 4.22  |
| S3_k141_95036                                | 1061  | No  | NA | 0   | 2 | Not-determined | Genome-fragment | NA              | 0     |
| S9_k141_100498                               | 2213  | No  | NA | 0   | 2 | Not-determined | Genome-fragment | NA              | 0     |
| S3_k141_106478                               | 1060  | No  | NA | 0   | 1 | Not-determined | Genome-fragment | NA              | 0     |
| S17-final-viral-combined_k141_103626  full   | 1583  | No  | NA | 0   | 0 | Low-quality    | Genome-fragment | NA              | 2.6   |
| S3_k141_77643                                | 1189  | No  | NA | 0   | 1 | Not-determined | Genome-fragment | NA              | 0     |
| S17-k141_153279                              | 1583  | No  | NA | 0   | 1 | Low-quality    | Genome-fragment | NA              | 4.46  |
| S12-final-viral-combined_k141_250632  full   | 1583  | No  | NA | 1   | 0 | Low-quality    | Genome-fragment | NA              | 0.61  |
| S3_k141_77663                                | 1374  | No  |    |     |   |                |                 |                 |       |



|                                              |      |     |    |      |     |   |                |                 |                 |      |       |
|----------------------------------------------|------|-----|----|------|-----|---|----------------|-----------------|-----------------|------|-------|
| S3_k141_72052                                | 7425 | No  | NA |      | 0   | 5 | Not-determined | Genome-fragment | NA              |      | 0     |
| S17-final-viral-combined_k141_57619  full    | 1584 | Yes |    | 1035 | 1   | 1 | Low-quality    | Genome-fragment | NA              | 0.57 | 34.66 |
| S3_k141_31807                                | 1048 | No  | NA |      | 0   | 1 | Not-determined | Genome-fragment | NA              |      | 0     |
| S3_k141_31812                                | 1456 | No  | NA |      | 0   | 1 | Not-determined | Genome-fragment | NA              |      | 0     |
| S3_k141_14509                                | 1118 | No  | NA |      | 0   | 1 | Not-determined | Genome-fragment | NA              |      | 0     |
| S17-final-viral-combined_k141_152772  full   | 1584 | No  | NA |      | 0   | 1 | Low-quality    | Genome-fragment | NA              | 2.35 | 0     |
| S3_k141_106685                               | 8208 | No  | NA |      | 0   | 2 | Not-determined | Genome-fragment | NA              |      | 0     |
| S3_k141_3875                                 | 1224 | No  | NA |      | 0   | 2 | Not-determined | Genome-fragment | NA              |      | 0     |
| S17-final-viral-combined_k141_171072  H2gene | 1584 | No  | NA |      | 2   | 0 | Low-quality    | Genome-fragment | NA              | 3.49 | 0     |
| S3_k141_37849                                | 1058 | No  | NA |      | 0   | 1 | Not-determined | Genome-fragment | NA              |      | 0     |
| S3_k141_60687                                | 1130 | No  | NA |      | 0   | 1 | Not-determined | Genome-fragment | NA              |      | 0     |
| S3_k141_83956                                | 1043 | No  | NA |      | 0   | 0 | Not-determined | Genome-fragment | NA              |      | 0     |
| S3_k141_77594                                | 1107 | No  | NA |      | 0   | 1 | Not-determined | Genome-fragment | NA              |      | 0     |
| S3_k141_8936                                 | 1615 | No  | NA |      | 0   | 0 | Not-determined | Genome-fragment | NA              |      | 0     |
| S3_k141_26285                                | 1009 | No  | NA |      | 0   | 1 | Not-determined | Genome-fragment | NA              |      | 0     |
| S3_k141_37861                                | 1235 | No  | NA |      | 0   | 0 | Not-determined | Genome-fragment | NA              |      | 0     |
| S3_k141_135602                               | 1444 | No  | NA |      | 0   | 1 | Not-determined | Genome-fragment | NA              |      | 0     |
| S3_k141_26322                                | 1206 | No  | NA |      | 0   | 0 | Not-determined | Genome-fragment | NA              |      | 0     |
| S3_k141_84003                                | 4501 | No  | NA |      | 0   | 2 | Not-determined | Genome-fragment | NA              |      | 0     |
| S3_k141_49225                                | 1376 | No  | NA |      | 0   | 0 | Not-determined | Genome-fragment | NA              |      | 0     |
| S12_k141_323461                              | 1584 | No  | NA |      | 0   | 1 | Low-quality    | Genome-fragment | NA              | 0.99 | 0     |
| S3_k141_49232                                | 2007 | No  | NA |      | 0   | 0 | Not-determined | Genome-fragment | NA              |      | 0     |
| S3_k141_8998                                 | 1082 | No  | NA |      | 0   | 1 | Not-determined | Genome-fragment | NA              |      | 0     |
| S12_k141_231875                              | 1584 | No  | NA |      | 0   | 1 | Low-quality    | Genome-fragment | NA              | 3.33 | 0     |
| S8-final-viral-combined_k141_215803  full    | 1584 | No  | NA |      | 1   | 0 | Low-quality    | Genome-fragment | NA              | 2.91 | 0     |
| S3_k141_60796                                | 3324 | No  | NA |      | 0   | 2 | Not-determined | Genome-fragment | NA              |      | 0     |
| S3_k141_100889                               | 1674 | No  | NA |      | 0   | 3 | Not-determined | Genome-fragment | NA              |      | 0     |
| S3_k141_135645                               | 1038 | No  | NA |      | 0   | 0 | Not-determined | Genome-fragment | NA              |      | 0     |
| S3_k141_89504                                | 2674 | No  | NA |      | 0   | 0 | Not-determined | Genome-fragment | NA              |      | 0     |
| S3_k141_124270                               | 1400 | No  | NA |      | 0   | 1 | Not-determined | Genome-fragment | NA              |      | 0     |
| S9-final-viral-combined_k141_51524  full     | 1585 | No  | NA |      | 0   | 0 | Low-quality    | Genome-fragment | NA              | 2.6  | 0     |
| S3-final-viral-combined_k141_47421  full     | 1585 | No  | NA |      | 0   | 2 | Low-quality    | Genome-fragment | NA              | 1.38 | 0     |
| S3_k141_124276                               | 1485 | No  | NA |      | 0   | 3 | Not-determined | Genome-fragment | NA              |      | 0     |
| S3_k141_26428                                | 2801 | No  | NA |      | 0   | 3 | Not-determined | Genome-fragment | NA              |      | 0     |
| S3_k141_49375                                | 3228 | No  | NA |      | 0   | 3 | Not-determined | Genome-fragment | NA              |      | 0     |
| S3_k141_100894                               | 3389 | No  | NA |      | 0   | 1 | Not-determined | Genome-fragment | NA              |      | 0     |
| S5-final-viral-combined_k141_17051  full     | 1585 | No  | NA |      | 1   | 0 | Low-quality    | Genome-fragment | NA              | 3.71 | 0     |
| S3_k141_89963                                | 1932 | No  | NA |      | 0   | 1 | Not-determined | Genome-fragment | NA              |      | 0     |
| S3_k141_89973                                | 1979 | No  | NA |      | 0   | 0 | Not-determined | Genome-fragment | NA              |      | 0     |
| S7-final-viral-combined_k141_173052  full    | 1585 | No  | NA |      | 0   | 0 | Low-quality    | Genome-fragment | NA              | 2.51 | 0     |
| S3_k141_78147                                | 1064 | No  | NA |      | 0   | 0 | Not-determined | Genome-fragment | NA              |      | 0     |
| S3_k141_230467                               | 1153 | No  | NA |      | 0   | 1 | Not-determined | Genome-fragment | NA              |      | 0     |
| S3_k141_9084                                 | 3847 | No  | NA |      | 0   | 2 | Not-determined | Genome-fragment | NA              |      | 0     |
| S3_k141_38075                                | 1512 | No  | NA |      | 0   | 2 | Not-determined | Genome-fragment | NA              |      | 0     |
| S3_k141_26509                                | 2006 | No  | NA |      | 0   | 1 | Not-determined | Genome-fragment | NA              |      | 0     |
| S3_k141_124138                               | 1254 | No  | NA |      | 0   | 1 | Not-determined | Genome-fragment | NA              |      | 0     |
| S3_k141_100987                               | 1189 | No  | NA |      | 0   | 1 | Not-determined | Genome-fragment | NA              |      | 0     |
| S3_k141_55275                                | 3121 | No  | NA |      | 0   | 0 | Not-determined | Genome-fragment | NA              |      | 0     |
| S17-final-viral-combined_k141_176480         | 1585 | No  | NA |      | 0   | 0 | Low-quality    | Genome-fragment | NA              | 1.86 | 0     |
| S3_k141_38109                                | 1282 | No  | NA |      | 0   | 1 | Not-determined | Genome-fragment | NA              |      | 0     |
| S3_k141_84119                                | 1040 | No  | NA |      | 0   | 0 | Not-determined | Genome-fragment | NA              |      | 0     |
| S3_k141_84129                                | 2990 | No  | NA |      | 0   | 1 | Not-determined | Genome-fragment | NA              |      | 0     |
| S2-final-viral-combined_k141_150176  full    | 1585 | No  | NA |      | 0   | 1 | Low-quality    | Genome-fragment | NA              | 1.66 | 0     |
| S2-final-viral-combined_k141_96767  H2gene   | 1585 | No  | NA |      | 1   | 0 | Low-quality    | Genome-fragment | NA              | 3.61 | 0     |
| S3_k141_124408                               | 1160 | No  | NA |      | 0   | 0 | Not-determined | Genome-fragment | NA              |      | 0     |
| S3_k141_130309                               | 1063 | No  | NA |      | 0   | 0 | Not-determined | Genome-fragment | NA              |      | 0     |
| S3_k141_95614                                | 1993 | No  | NA |      | 0   | 0 | Not-determined | Genome-fragment | NA              |      | 0     |
| S2_k141_235717                               | 1585 | No  | NA |      | 0   | 1 | Low-quality    | Genome-fragment | NA              | 0.76 | 0     |
| S3_k141_106091                               | 1005 | No  | NA |      | 0   | 1 | Not-determined | Genome-fragment | NA              |      | 0     |
| S6_k141_67138                                | 1585 | No  | NA |      | 1   | 0 | Low-quality    | Genome-fragment | NA              | 2.63 | 0     |
| S9-final-viral-combined_k141_22181  full     | 1586 | No  | NA |      | 0   | 0 | Low-quality    | Genome-fragment | NA              | 1.92 | 0     |
| S3_k141_14836                                | 2178 | No  | NA |      | 0   | 2 | Not-determined | Genome-fragment | NA              |      | 0     |
| S3_k141_32125                                | 2050 | No  | NA |      | 0   | 2 | Not-determined | Genome-fragment | NA              |      | 0     |
| S5-final-viral-combined_k141_175574  full    | 1586 | Yes | NA |      | 717 | 1 | 1              | Low-quality     | Genome-fragment | 1.34 | 54.79 |
| S3_k141_60689                                | 1119 | No  | NA |      | 0   | 1 | Not-determined | Genome-fragment | NA              |      | 0     |
| S3_k141_14857                                | 1648 | No  | NA |      | 0   | 2 | Not-determined | Genome-fragment | NA              |      | 0     |
| S3_k141_32148                                | 1898 | No  | NA |      | 0   | 0 | Not-determined | Genome-fragment | NA              |      | 0     |
| S3_k141_72524                                | 1079 | No  | NA |      | 0   | 1 | Not-determined | Genome-fragment | NA              |      | 0     |
| S5-final-viral-combined_k141_199773  H2gene  | 1586 | No  | NA |      | 1   | 0 | Low-quality    | Genome-fragment | NA              | 2.96 | 0     |
| S3_k141_14886                                | 1545 | No  | NA |      | 0   | 0 | Not-determined | Genome-fragment | NA              |      | 0     |
| S3_k141_61059                                | 1444 | No  | NA |      | 0   | 2 | Not-determined | Genome-fragment | NA              |      | 0     |
| S3_k141_61060                                | 1653 | No  | NA |      | 0   | 1 | Not-determined | Genome-fragment | NA              |      | 0     |
| S3_k141_20892                                | 1088 | No  | NA |      | 0   | 1 | Not-determined | Genome-fragment | NA              |      | 0     |
| S4-final-viral-combined_k141_162101  full    | 1586 | No  | NA |      | 0   | 0 | Low-quality    | Genome-fragment | NA              | 2.68 | 0     |
| S3_k141_84292                                | 1290 | No  | NA |      | 0   | 1 | Not-determined | Genome-fragment | NA              |      | 0     |
| S3_k141_112931                               | 1463 | No  | NA |      | 0   | 1 | Not-determined | Genome-fragment | NA              |      | 0     |
| S3_k141_130467                               | 1075 | No  | NA |      | 0   | 0 | Not-determined | Genome-fragment | NA              |      | 0     |
| S3_k141_124561                               | 1816 | No  | NA |      | 0   | 2 | Not-determined | Genome-fragment | NA              |      | 0     |
| S3_k141_61089                                | 2098 | No  | NA |      | 0   | 3 | Not-determined | Genome-fragment | NA              |      | 0     |
| S4_k141_124600                               | 1586 | No  | NA |      | 0   | 1 | Low-quality    | Genome-fragment | NA              | 3.01 | 0     |
| S3_k141_20919                                | 1047 | No  | NA |      | 0   | 0 | Not-determined | Genome-fragment | NA              |      | 0     |
| S6-final-viral-combined_k141_5934  full      | 1586 | No  | NA |      | 0   | 0 | Low-quality    | Genome-fragment | NA              | 0.96 | 0     |
| S3_k141_49605                                | 1451 | No  | NA |      | 0   | 1 | Not-determined | Genome-fragment | NA              |      | 0     |
| S3_k141_135920                               | 1033 | No  | NA |      | 0   | 0 | Not-determined | Genome-fragment | NA              |      | 0     |
| S3_k141_43282                                | 3510 | No  | NA |      | 0   | 2 | Not-determined | Genome-fragment | NA              |      | 0     |
| S3_k141_135926                               | 1914 | No  | NA |      | 0   | 1 | Not-determined | Genome-fragment | NA              |      | 0     |
| S3_k141_107159                               | 1152 | No  | NA |      | 0   | 1 | Not-determined | Genome-fragment | NA              |      | 0     |
| S3_k141_112974                               | 1786 | No  | NA |      | 0   | 4 | Not-determined | Genome-fragment | NA              |      | 0     |
| S3_k141_118083                               | 3888 | No  | NA |      | 0   | 2 | Not-determined | Genome-fragment | NA              |      | 0     |
| S6_k141_138272                               | 1586 | No  | NA |      | 0   | 0 | Low-quality    | Genome-fragment | NA              | 1.62 | 0     |
| S8-final-viral-combined_k141_253262  full    | 1586 | No  | NA |      | 2   | 0 | Low-quality    | Genome-fragment | NA              | 4.48 | 0     |
| S3_k141_84374                                | 3876 | No  | NA |      | 0   | 2 | Not-determined | Genome-fragment | NA              |      | 0     |
| S8_k141_104240                               | 1586 | No  | NA |      | 0   | 0 | Low-quality    | Genome-fragment | NA              | 1.88 | 0     |
| S3_k141_113013                               | 1299 | No  | NA |      | 0   | 3 | Not-determined | Genome-fragment | NA              |      | 0     |
| S3_k141_32294                                | 1002 | No  | NA |      | 0   | 1 | Not-determined | Genome-fragment | NA              |      | 0     |
| S5-final-viral-combined_k141_179828  H2gene  | 1587 | No  | NA |      | 1   | 0 | Low-quality    | Genome-fragment | NA              | 4.43 | 0     |
| S3_k141_9399                                 | 1342 | No  | NA |      | 0   | 0 | Not-determined | Genome-fragment | NA              |      | 0     |
| S3_k141_38428                                | 2516 | No  | NA |      | 0   | 1 | Not-determined | Genome-fragment | NA              |      | 0     |
| S3_k141_95841                                | 1359 | No  | NA |      | 0   | 1 | Not-determined | Genome-fragment | NA              |      | 0     |
| S3_k141_15001                                | 3802 | No  | NA |      | 0   | 2 | Not-determined | Genome-fragment | NA              |      | 0     |
| S3_k141_49694                                | 1368 | No  | NA |      | 0   | 1 | Not-determined | Genome-fragment | NA              |      | 0     |
| S3_k141_55615                                | 1354 | No  | NA |      | 0   | 1 | Not-determined | Genome-fragment | NA              |      | 0     |
| S12-final-viral-combined_k141_44704  full    | 1587 | No  | NA |      | 0   | 1 | Low-quality    | Genome-fragment | NA              | 4.08 | 0     |
| S3_k141_15049                                | 5834 | No  | NA |      | 0   | 1 | Not-determined | Genome-fragment | NA              |      | 0     |
| S3_k141_90344                                | 1112 | No  | NA |      | 0   | 1 | Not-determined | Genome-fragment | NA              |      | 0     |
| S3_k141_95876                                | 1396 | No  | NA |      | 0   | 1 | Not-determined | Genome-fragment | NA              |      | 0     |
| S3_k141_43953                                | 1762 | No  | NA |      | 0   | 0 | Not-determined | Genome-fragment | NA              |      | 0     |
| S3_k141_26881                                | 2076 | No  | NA |      | 0   | 0 | Not-determined | Genome-fragment | NA              |      | 0     |
| S3_k141_21122                                | 6910 | No  | NA |      | 0   | 2 | Not-determined | Genome-fragment | NA              |      | 0     |
| S3_k141_90386                                | 1406 | No  | NA |      | 0   | 1 | Not-determined | Genome-fragment | NA              |      | 0     |
| S2-final-viral-combined_k141_52608  full     | 1587 | No  | NA |      | 0   | 0 | Low-quality    | Genome-fragment | NA              | 3.13 | 0     |
| S3_k141_4089                                 | 1005 | No  | NA |      | 0   | 0 | Not-determined | Genome-fragment | NA              |      | 0     |
| S2-final-viral-combined_k141_196687  full    | 1587 | No  | NA |      | 0   | 0 | Low-quality    | Genome-fragment | NA              | 1.61 | 0     |
| S4-final-viral-combined_k141_12514  full     | 1587 | No  | NA |      | 0   | 0 | Low-quality    | Genome-fragment | NA              | 4.75 | 0     |
| S3_k141_15119                                | 1042 | No  | NA |      | 0   | 0 | Not-determined | Genome-fragment | NA              |      | 0     |
| S6-final-viral-combined_k141_102734  full    | 1587 | No  | NA |      | 0   | 1 | Low-quality    | Genome-fragment | NA              | 1.48 | 0     |
| S8-final-viral-combined_k141_16125  H2gene   | 1587 | No  | NA |      | 2   | 0 | Low-quality    | Genome-fragment | NA              | 2.29 | 0     |
| S3_k141_101202                               | 1072 | No  | NA |      | 0   | 1 | Not-determined | Genome-fragment | NA              |      | 0     |
| S3_k141_130686                               | 1100 | No  | NA |      | 0   | 0 | Not-determined | Genome-fragment | NA              |      | 0     |
| S3_k141_14768                                | 1588 | No  | NA |      | 0   | 0 | Low-quality    | Genome-fragment | NA              | 2.46 | 0     |
| S7_k141_73195                                | 1588 | No  | NA |      | 0   | 1 | Low-quality    | Genome-fragment | NA              | 1.04 | 0     |
| S12-final-viral-combined_k141_400843  H2gene | 1588 | No  | NA |      | 1   | 0 | Low-quality    | Genome-fragment | NA              | 3.69 | 0     |
| S3_k141_107387                               | 1353 | No  | NA |      | 0   | 1 | Not-determined | Genome-fragment | NA              |      | 0     |
| S3_k141_107406                               | 1024 | No  | NA |      | 0   | 1 | Not-determined | Genome-fragment | NA              |      | 0     |
| S3_k141_130716                               | 3788 | No  | NA |      | 0   | 1 | Not-determined | Genome-fragment | NA              |      | 0     |
| S3_k141_32476                                | 1103 | No  | NA |      | 0   | 1 | Not-determined | Genome-fragment | NA              |      | 0     |
| S3_k141_124846                               | 1979 | No  | NA |      | 0   | 0 | Not-determined | Genome-fragment | NA              |      | 0     |
| S12_k141_247168                              | 1588 | No  | NA |      | 0   | 0 | Low-quality    | Genome-fragment | NA              | 1.6  | 0     |
| S3_k141_130736                               | 1482 | No  | NA |      | 0   | 0 | Not-determined | Genome-fragment | NA              |      | 0     |
| S3_k141_61326                                | 1078 | No  | NA |      | 0   | 2 | Not-determined | Genome-fragment | NA              |      | 0     |
| S4_k141_102486                               | 1588 | No  | NA |      | 0   | 0 | Low-quality    | Genome-fragment | NA              | 3.53 | 0     |
| S3_k141_4180                                 | 2614 | No  | NA |      | 0   | 1 | Not-determined | Genome-fragment | NA              |      | 0     |
| S3_k141_21266                                | 1220 | No  | NA |      | 0   | 0 |                |                 |                 |      |       |



|                                              |  |       |     |    |     |   |                   |                 |    |      |       |
|----------------------------------------------|--|-------|-----|----|-----|---|-------------------|-----------------|----|------|-------|
| S3_k141_15401                                |  | 6692  | No  | NA | 0   | 1 | Not-determined    | Genome-fragment | NA |      | 0     |
| S12_k141_219390                              |  | 1590  | No  | NA | 0   | 0 | Low-quality       | Genome-fragment | NA | 0.73 | 0     |
| S3_k141_119643                               |  | 1040  | No  | NA | 0   | 0 | Not-determined    | Genome-fragment | NA |      | 0     |
| S3_k141_131082                               |  | 1042  | No  | NA | 0   | 0 | Not-determined    | Genome-fragment | NA |      | 0     |
| S3_k141_101714                               |  | 1230  | No  | NA | 0   | 0 | 1 Not-determined  | Genome-fragment | NA |      | 0     |
| S3_k141_90742                                |  | 1045  | No  | NA | 0   | 0 | 2 Not-determined  | Genome-fragment | NA |      | 0     |
| S3_k141_113633                               |  | 1168  | No  | NA | 0   | 0 | 1 Not-determined  | Genome-fragment | NA |      | 0     |
| S3_k141_9909                                 |  | 2409  | No  | NA | 0   | 0 | 2 Not-determined  | Genome-fragment | NA |      | 0     |
| S3_k141_14320                                |  | 1113  | No  | NA | 0   | 0 | 1 Not-determined  | Genome-fragment | NA |      | 0     |
| S4_k141_68299                                |  | 1590  | No  | NA | 0   | 0 | 0 Low-quality     | Genome-fragment | NA | 1.63 | 0     |
| S3_k141_27347                                |  | 1698  | No  | NA | 0   | 0 | 1 Not-determined  | Genome-fragment | NA |      | 0     |
| S3_k141_50155                                |  | 1594  | No  | NA | 0   | 0 | 0 Not-determined  | Genome-fragment | NA |      | 0     |
| S3_k141_90778                                |  | 11861 | No  | NA | 0   | 0 | 7 Not-determined  | Genome-fragment | NA |      | 0     |
| S3_k141_44335                                |  | 1853  | No  | NA | 0   | 0 | 0 Not-determined  | Genome-fragment | NA |      | 0     |
| S3_k141_73148                                |  | 1232  | No  | NA | 0   | 0 | 1 Not-determined  | Genome-fragment | NA |      | 0     |
| S4_k141_36643                                |  | 1590  | No  | NA | 0   | 0 | 0 Low-quality     | Genome-fragment | NA | 1.49 | 0     |
| S3_k141_115685                               |  | 7847  | No  | NA | 0   | 0 | 4 Not-determined  | Genome-fragment | NA |      | 0     |
| S3-final-viral-combined_k141_54609  full     |  | 1591  | No  | NA | 0   | 0 | 0 Low-quality     | Genome-fragment | NA | 1.93 | 0     |
| S3_k141_85039                                |  | 1042  | No  | NA | 0   | 0 | 0 Not-determined  | Genome-fragment | NA |      | 0     |
| S3_k141_15505                                |  | 1079  | No  | NA | 0   | 0 | 1 Not-determined  | Genome-fragment | NA |      | 0     |
| S3-final-viral-combined_k141_60651  full     |  | 1591  | Yes | NA | 540 | 1 | 1 Low-quality     | Genome-fragment | NA | 1.12 | 66.06 |
| S11-final-viral-combined_k141_329390  full   |  | 1591  | No  | NA | 3   | 0 | 0 Low-quality     | Genome-fragment | NA | 4.33 | 0     |
| S3_k141_27427                                |  | 1043  | No  | NA | 0   | 0 | 0 Not-determined  | Genome-fragment | NA |      | 0     |
| S3_k141_113756                               |  | 1484  | No  | NA | 0   | 0 | 1 Not-determined  | Genome-fragment | NA |      | 0     |
| S3_k141_4619                                 |  | 3790  | No  | NA | 0   | 0 | 3 Not-determined  | Genome-fragment | NA |      | 0     |
| S3_k141_44476                                |  | 1155  | No  | NA | 0   | 0 | 1 Not-determined  | Genome-fragment | NA |      | 0     |
| S3_k141_136638                               |  | 1055  | No  | NA | 0   | 0 | 0 Not-determined  | Genome-fragment | NA |      | 0     |
| S3_k141_39100                                |  | 1097  | No  | NA | 0   | 0 | 0 Not-determined  | Genome-fragment | NA |      | 0     |
| S3_k141_4640                                 |  | 2314  | No  | NA | 0   | 0 | 2 Not-determined  | Genome-fragment | NA |      | 0     |
| S3_k141_107867                               |  | 1235  | No  | NA | 0   | 0 | 0 Not-determined  | Genome-fragment | NA |      | 0     |
| S3_k141_107868                               |  | 1028  | No  | NA | 0   | 0 | 1 Not-determined  | Genome-fragment | NA |      | 0     |
| S3_k141_10087                                |  | 2166  | No  | NA | 0   | 0 | 1 Not-determined  | Genome-fragment | NA |      | 0     |
| S11-final-viral-combined_k141_302872  H2gene |  | 1591  | No  | NA | 1   | 0 | 0 Low-quality     | Genome-fragment | NA | 4.05 | 0     |
| S3_k141_4707                                 |  | 1347  | No  | NA | 0   | 0 | 2 Not-determined  | Genome-fragment | NA |      | 0     |
| S3_k141_39158                                |  | 1024  | No  | NA | 0   | 0 | 0 Not-determined  | Genome-fragment | NA |      | 0     |
| S3_k141_67745                                |  | 1117  | No  | NA | 0   | 0 | 1 Not-determined  | Genome-fragment | NA |      | 0     |
| S3_k141_67771                                |  | 1103  | No  | NA | 0   | 0 | 1 Not-determined  | Genome-fragment | NA |      | 0     |
| S1-final-viral-combined_k141_201130  full    |  | 1591  | No  | NA | 0   | 0 | 0 Low-quality     | Genome-fragment | NA | 1.02 | 0     |
| S3_k141_91007                                |  | 1043  | No  | NA | 0   | 0 | 1 Not-determined  | Genome-fragment | NA |      | 0     |
| S1-final-viral-combined_k141_8924  H2gene    |  | 1591  | No  | NA | 2   | 0 | 0 Low-quality     | Genome-fragment | NA | 4.64 | 0     |
| S3_k141_21846                                |  | 2452  | No  | NA | 0   | 0 | 1 Not-determined  | Genome-fragment | NA |      | 0     |
| S3_k141_4761                                 |  | 1885  | No  | NA | 0   | 0 | 1 Not-determined  | Genome-fragment | NA |      | 0     |
| S3_k141_4763                                 |  | 1470  | No  | NA | 0   | 0 | 1 Not-determined  | Genome-fragment | NA |      | 0     |
| S3_k141_119915                               |  | 1200  | No  | NA | 0   | 0 | 1 Not-determined  | Genome-fragment | NA |      | 0     |
| S3_k141_107997                               |  | 1014  | No  | NA | 0   | 0 | 0 Not-determined  | Genome-fragment | NA |      | 0     |
| S1_k141_359450                               |  | 1591  | No  | NA | 0   | 0 | 1 Low-quality     | Genome-fragment | NA | 1.21 | 0     |
| S3_k141_108003                               |  | 1009  | No  | NA | 0   | 0 | 0 Not-determined  | Genome-fragment | NA |      | 0     |
| S3-final-viral-combined_k141_76068  full     |  | 1591  | No  | NA | 1   | 0 | 0 Low-quality     | Genome-fragment | NA | 3.54 | 0     |
| S3_k141_33086                                |  | 1463  | No  | NA | 0   | 0 | 1 Not-determined  | Genome-fragment | NA |      | 0     |
| S3_k141_15727                                |  | 1014  | No  | NA | 0   | 0 | 0 Not-determined  | Genome-fragment | NA |      | 0     |
| S3_k141_108031                               |  | 1899  | No  | NA | 0   | 0 | 1 Not-determined  | Genome-fragment | NA |      | 0     |
| S3_k141_146657                               |  | 2062  | No  | NA | 0   | 0 | 0 Not-determined  | Genome-fragment | NA |      | 0     |
| S5-final-viral-combined_k141_141223  H2gene  |  | 1591  | No  | NA | 2   | 0 | 0 Low-quality     | Genome-fragment | NA | 4.27 | 0     |
| S3_k141_39288                                |  | 1108  | No  | NA | 0   | 0 | 1 Not-determined  | Genome-fragment | NA |      | 0     |
| S3_k141_21941                                |  | 3176  | No  | NA | 0   | 0 | 1 Not-determined  | Genome-fragment | NA |      | 0     |
| S3_k141_125618                               |  | 1087  | No  | NA | 0   | 0 | 0 Not-determined  | Genome-fragment | NA |      | 0     |
| S3_k141_125633                               |  | 1105  | No  | NA | 0   | 0 | 2 Not-determined  | Genome-fragment | NA |      | 0     |
| S11-final-viral-combined_k141_49200  full    |  | 1592  | No  | NA | 0   | 0 | 1 Low-quality     | Genome-fragment | NA | 3.45 | 0     |
| S1-final-viral-combined_k141_118405  full    |  | 1592  | No  | NA | 0   | 0 | 0 Low-quality     | Genome-fragment | NA | 5.13 | 0     |
| S3_k141_96764                                |  | 1035  | No  | NA | 0   | 0 | 1 Not-determined  | Genome-fragment | NA |      | 0     |
| S3_k141_114038                               |  | 1366  | No  | NA | 0   | 0 | 1 Not-determined  | Genome-fragment | NA |      | 0     |
| S3_k141_50489                                |  | 2162  | No  | NA | 0   | 0 | 1 Not-determined  | Genome-fragment | NA |      | 0     |
| S3_k141_73474                                |  | 1183  | No  | NA | 0   | 0 | 2 Not-determined  | Genome-fragment | NA |      | 0     |
| S3-final-viral-combined_k141_88985  full     |  | 1592  | No  | NA | 0   | 0 | 1 Low-quality     | Genome-fragment | NA | 0.76 | 0     |
| S3_k141_22019                                |  | 1173  | No  | NA | 0   | 0 | 2 Not-determined  | Genome-fragment | NA |      | 0     |
| S3_k141_27814                                |  | 3168  | No  | NA | 0   | 0 | 2 Not-determined  | Genome-fragment | NA |      | 0     |
| S3_k141_15839                                |  | 1015  | No  | NA | 0   | 0 | 1 Not-determined  | Genome-fragment | NA |      | 0     |
| S3_k141_73509                                |  | 1604  | No  | NA | 0   | 0 | 2 Not-determined  | Genome-fragment | NA |      | 0     |
| S3_k141_44774                                |  | 1524  | No  | NA | 0   | 0 | 0 Not-determined  | Genome-fragment | NA |      | 0     |
| S3_k141_62179                                |  | 3027  | No  | NA | 0   | 0 | 1 Not-determined  | Genome-fragment | NA |      | 0     |
| S3_k141_85362                                |  | 9326  | No  | NA | 0   | 0 | 2 Not-determined  | Genome-fragment | NA |      | 0     |
| S3_k141_125747                               |  | 1155  | No  | NA | 0   | 0 | 2 Not-determined  | Genome-fragment | NA |      | 0     |
| S5-final-viral-combined_k141_75692  full     |  | 1592  | No  | NA | 0   | 0 | 0 Low-quality     | Genome-fragment | NA | 0.61 | 0     |
| S3_k141_27884                                |  | 1776  | No  | NA | 0   | 0 | 1 Not-determined  | Genome-fragment | NA |      | 0     |
| S3_k141_136029                               |  | 1282  | No  | NA | 0   | 0 | 1 Not-determined  | Genome-fragment | NA |      | 0     |
| S3_k141_56522                                |  | 1436  | No  | NA | 0   | 0 | 1 Not-determined  | Genome-fragment | NA |      | 0     |
| S3_k141_33291                                |  | 1136  | No  | NA | 0   | 0 | 2 Not-determined  | Genome-fragment | NA |      | 0     |
| S3-final-viral-combined_k141_61615  full     |  | 1592  | No  | NA | 1   | 0 | 0 Low-quality     | Genome-fragment | NA | 1.25 | 0     |
| S3_k141_73620                                |  | 1467  | No  | NA | 0   | 0 | 0 Not-determined  | Genome-fragment | NA |      | 0     |
| S3_k141_136998                               |  | 1010  | No  | NA | 0   | 0 | 1 Not-determined  | Genome-fragment | NA |      | 0     |
| S3_k141_22177                                |  | 1336  | No  | NA | 0   | 0 | 1 Not-determined  | Genome-fragment | NA |      | 0     |
| S3_k141_21284                                |  | 1157  | No  | NA | 0   | 0 | 0 Not-determined  | Genome-fragment | NA |      | 0     |
| S3_k141_10505                                |  | 1326  | No  | NA | 0   | 0 | 1 Not-determined  | Genome-fragment | NA |      | 0     |
| S3_k141_62289                                |  | 2152  | No  | NA | 0   | 0 | 1 Not-determined  | Genome-fragment | NA |      | 0     |
| S3_k141_96938                                |  | 2018  | No  | NA | 0   | 0 | 1 Not-determined  | Genome-fragment | NA |      | 0     |
| S3_k141_33377                                |  | 2041  | No  | NA | 0   | 0 | 0 Not-determined  | Genome-fragment | NA |      | 0     |
| S3_k141_120280                               |  | 1037  | No  | NA | 0   | 0 | 1 Not-determined  | Genome-fragment | NA |      | 0     |
| S3_k141_73649                                |  | 1209  | No  | NA | 0   | 0 | 0 Not-determined  | Genome-fragment | NA |      | 0     |
| S3_k141_57564                                |  | 1562  | No  | NA | 0   | 0 | 0 Low-quality     | Genome-fragment | NA | 2.85 | 0     |
| S3_k141_33424                                |  | 5120  | No  | NA | 0   | 0 | 0 Not-determined  | Genome-fragment | NA |      | 0     |
| S12_k141_257693                              |  | 1592  | Yes | NA | 440 | 1 | 1 Low-quality     | Genome-fragment | NA | 1.12 | 72.36 |
| S3_k141_50705                                |  | 1598  | No  | NA | 0   | 0 | 1 Not-determined  | Genome-fragment | NA |      | 0     |
| S3_k141_62330                                |  | 1976  | No  | NA | 0   | 0 | 1 Not-determined  | Genome-fragment | NA |      | 0     |
| S3-final-viral-combined_k141_106254  full    |  | 1593  | No  | NA | 0   | 0 | 1 Low-quality     | Genome-fragment | NA | 0.55 | 0     |
| S3_k141_114266                               |  | 3066  | No  | NA | 0   | 0 | 2 Not-determined  | Genome-fragment | NA |      | 0     |
| S3_k141_102274                               |  | 1121  | No  | NA | 0   | 0 | 2 Not-determined  | Genome-fragment | NA |      | 0     |
| S3_k141_39593                                |  | 3384  | No  | NA | 0   | 0 | 2 Not-determined  | Genome-fragment | NA |      | 0     |
| S11-final-viral-combined_k141_255341  full   |  | 1593  | No  | NA | 0   | 0 | 1 Low-quality     | Genome-fragment | NA | 2.02 | 0     |
| S3_k141_62380                                |  | 1040  | No  | NA | 0   | 0 | 1 Not-determined  | Genome-fragment | NA |      | 0     |
| S11-final-viral-combined_k141_302394  full   |  | 1593  | No  | NA | 0   | 0 | 1 Low-quality     | Genome-fragment | NA | 2.46 | 0     |
| S3_k141_50759                                |  | 3088  | No  | NA | 0   | 0 | 1 Not-determined  | Genome-fragment | NA |      | 0     |
| S11-final-viral-combined_k141_292904  H2gene |  | 1593  | No  | NA | 1   | 0 | 0 Low-quality     | Genome-fragment | NA | 3.54 | 0     |
| S3_k141_28082                                |  | 5300  | No  | NA | 0   | 0 | 2 Not-determined  | Genome-fragment | NA |      | 0     |
| S3_k141_56692                                |  | 8573  | No  | NA | 0   | 0 | 2 Not-determined  | Genome-fragment | NA |      | 0     |
| S3_k141_14982                                |  | 7614  | No  | NA | 0   | 0 | 1 Not-determined  | Genome-fragment | NA |      | 0     |
| S1-final-viral-combined_k141_362628  full    |  | 1593  | No  | NA | 0   | 0 | 0 Low-quality     | Genome-fragment | NA | 3.72 | 0     |
| S3_k141_28116                                |  | 1043  | No  | NA | 0   | 0 | 0 Not-determined  | Genome-fragment | NA |      | 0     |
| S3_k141_97079                                |  | 5803  | No  | NA | 0   | 0 | 3 Not-determined  | Genome-fragment | NA |      | 0     |
| S3_k141_91410                                |  | 2332  | No  | NA | 0   | 0 | 2 Not-determined  | Genome-fragment | NA |      | 0     |
| S3_k141_137119                               |  | 1016  | No  | NA | 0   | 0 | 3 Not-determined  | Genome-fragment | NA |      | 0     |
| S3_k141_79797                                |  | 1353  | No  | NA | 0   | 0 | 0 Not-determined  | Genome-fragment | NA |      | 0     |
| S3_k141_28172                                |  | 1579  | No  | NA | 0   | 0 | 2 Not-determined  | Genome-fragment | NA |      | 0     |
| S3_k141_79814                                |  | 3375  | No  | NA | 0   | 0 | 1 Not-determined  | Genome-fragment | NA |      | 0     |
| S3_k141_79854                                |  | 1154  | No  | NA | 0   | 0 | 1 Not-determined  | Genome-fragment | NA |      | 0     |
| S3_k141_73891                                |  | 4023  | No  | NA | 0   | 0 | 1 Not-determined  | Genome-fragment | NA |      | 0     |
| S1-final-viral-combined_k141_383405  full    |  | 1593  | No  | NA | 0   | 0 | 0 Low-quality     | Genome-fragment | NA | 3.47 | 0     |
| S3_k141_79887                                |  | 1561  | No  | NA | 0   | 0 | 1 Not-determined  | Genome-fragment | NA |      | 0     |
| S3_k141_45164                                |  | 3380  | No  | NA | 0   | 0 | 1 Not-determined  | Genome-fragment | NA |      | 0     |
| S3_k141_45170                                |  | 1024  | No  | NA | 0   | 0 | 1 Not-determined  | Genome-fragment | NA |      | 0     |
| S5-final-viral-combined_k141_1084  full      |  | 1593  | No  | NA | 0   | 0 | 2 Low-quality     | Genome-fragment | NA | 0.83 | 0     |
| S3_k141_97244                                |  | 2448  | No  | NA | 0   | 0 | 1 Not-determined  | Genome-fragment | NA |      | 0     |
| S5-final-viral-combined_k141_190565  full    |  | 1593  | No  | NA | 0   | 0 | 0 Low-quality     | Genome-fragment | NA | 2.73 | 0     |
| S3_k141_108486                               |  | 6589  | No  | NA | 0   | 0 | 4 Not-determined  | Genome-fragment | NA |      | 0     |
| S3_k141_126267                               |  | 6078  | No  | NA | 0   | 0 | 12 Not-determined | Genome-fragment | NA |      | 0     |
| S3_k141_114548                               |  | 1170  | No  | NA | 0   | 0 | 0 Not-determined  | Genome-fragment | NA |      | 0     |
| S3_k141_33749                                |  | 1019  | No  | NA | 0   | 0 | 1 Not-determined  | Genome-fragment | NA |      | 0     |
| S3_k141_126335                               |  | 1018  | No  | NA | 0   | 0 | 0 Not-determined  | Genome-fragment | NA |      | 0     |
| S3_k141_22618                                |  | 3923  | No  | NA | 0   | 0 | 1 Not-determined  | Genome-fragment | NA |      | 0     |
| S3_k141_5511                                 |  | 1610  | No  | NA | 0   | 0 | 3 Not-determined  | Genome-fragment | NA |      | 0     |
| S7-final-viral-combined_k141_313111  H2gene  |  | 1593  | No  | NA | 1   | 0 | 0 Low-quality     | Genome-fragment | NA | 1.49 | 0     |
| S7_k141_221573                               |  | 1593  | No  | NA | 0   | 0 | 0 Low-quality     | Genome-fragment | NA | 2.76 | 0     |
| S3_k141_120735                               |  | 1183  | No  | NA | 0   | 0 | 2 Not-determined  | Genome-fragment | NA |      |       |



|                                      |       |    |    |    |   |                  |                 |    |       |
|--------------------------------------|-------|----|----|----|---|------------------|-----------------|----|-------|
| S3_k141_80321                        | 1300  | No | NA | 0  | 1 | Not-determined   | Genome-fragment | NA | 0     |
| S3_k141_11237                        | 1514  | No | NA | 0  | 0 | Not-determined   | Genome-fragment | NA | 0     |
| S1-final-viral-combined_k141_386569  | 1595  | No | NA | 0  | 0 | Low-quality      | Genome-fragment | NA | 3.26  |
| S3_k141_16765                        | 1002  | No | NA | 0  | 0 | Not-determined   | Genome-fragment | NA | 0     |
| S3_k141_80334                        | 1299  | No | NA | 0  | 0 | 1 Not-determined | Genome-fragment | NA | 0     |
| S3_k141_11249                        | 1927  | No | NA | 0  | 1 | Not-determined   | Genome-fragment | NA | 0     |
| S3_k141_22975                        | 1861  | No | NA | 0  | 0 | 1 Not-determined | Genome-fragment | NA | 0     |
| S4-final-viral-combined_k141_99029   | 1595  | No | NA | 1  | 0 | Low-quality      | Genome-fragment | NA | 1.57  |
| S3_k141_97722                        | 2186  | No | NA | 0  | 0 | Not-determined   | Genome-fragment | NA | 0     |
| S4_k141_188                          | 1595  | No | NA | 0  | 0 | 1 Low-quality    | Genome-fragment | NA | 1.07  |
| S8-final-viral-combined_k141_167141  | 1595  | No | NA | 0  | 0 | Low-quality      | Genome-fragment | NA | 2.49  |
| S3_k141_45555                        | 5998  | No | NA | 0  | 4 | Not-determined   | Genome-fragment | NA | 0     |
| S3_k141_80383                        | 1302  | No | NA | 0  | 0 | Not-determined   | Genome-fragment | NA | 0     |
| S3_k141_80393                        | 3217  | No | NA | 0  | 1 | Not-determined   | Genome-fragment | NA | 0     |
| S3_k141_45577                        | 2367  | No | NA | 0  | 2 | Not-determined   | Genome-fragment | NA | 0     |
| S3_k141_103039                       | 1454  | No | NA | 0  | 0 | Not-determined   | Genome-fragment | NA | 0     |
| S3_k141_51491                        | 1308  | No | NA | 0  | 1 | Not-determined   | Genome-fragment | NA | 0     |
| S11-final-viral-combined_k141_19658  | 1596  | No | NA | 2  | 0 | Low-quality      | Genome-fragment | NA | 3.7   |
| S3_k141_63053                        | 1402  | No | NA | 0  | 2 | Not-determined   | Genome-fragment | NA | 0     |
| S3_k141_11378                        | 4812  | No | NA | 0  | 2 | Not-determined   | Genome-fragment | NA | 0     |
| S3_k141_80489                        | 1136  | No | NA | 0  | 0 | Not-determined   | Genome-fragment | NA | 0     |
| S2_k141_109008                       | 1355  | No | NA | 0  | 1 | Not-determined   | Genome-fragment | NA | 0     |
| S3_k141_74581                        | 2479  | No | NA | 0  | 2 | Not-determined   | Genome-fragment | NA | 0     |
| S3_k141_63127                        | 3127  | No | NA | 0  | 1 | Not-determined   | Genome-fragment | NA | 0     |
| S3_k141_51540                        | 1237  | No | NA | 0  | 1 | Not-determined   | Genome-fragment | NA | 0     |
| S3_k141_51565                        | 3131  | No | NA | 0  | 2 | Not-determined   | Genome-fragment | NA | 0     |
| S3_k141_137758                       | 1139  | No | NA | 0  | 1 | Not-determined   | Genome-fragment | NA | 0     |
| S3_k141_45762                        | 1851  | No | NA | 0  | 1 | Not-determined   | Genome-fragment | NA | 0     |
| S3_k141_51632                        | 2466  | No | NA | 0  | 0 | Not-determined   | Genome-fragment | NA | 0     |
| S3_k141_35655                        | 1596  | No | NA | 0  | 1 | Low-quality      | Genome-fragment | NA | 3.84  |
| S7_k141_207367                       | 1596  | No | NA | 0  | 1 | Low-quality      | Genome-fragment | NA | 3.44  |
| S3_k141_1031257                      | 1051  | No | NA | 0  | 2 | Not-determined   | Genome-fragment | NA | 0     |
| S12-final-viral-combined_k141_68938  | 1596  | No | NA | 0  | 0 | Low-quality      | Genome-fragment | NA | 2.67  |
| S3_k141_45844                        | 2484  | No | NA | 0  | 1 | Not-determined   | Genome-fragment | NA | 0     |
| S3_k141_137877                       | 3311  | No | NA | 0  | 0 | Not-determined   | Genome-fragment | NA | 0     |
| S12_k141_110344                      | 1596  | No | NA | 0  | 0 | Low-quality      | Genome-fragment | NA | 3.37  |
| S3_k141_137885                       | 4589  | No | NA | 0  | 0 | Not-determined   | Genome-fragment | NA | 0     |
| S11-final-viral-combined_k141_256976 | 1597  | No | NA | 0  | 0 | Low-quality      | Genome-fragment | NA | 2.49  |
| S3_k141_137952                       | 1012  | No | NA | 0  | 0 | Not-determined   | Genome-fragment | NA | 0     |
| S3_k141_137953                       | 1145  | No | NA | 0  | 0 | Not-determined   | Genome-fragment | NA | 0     |
| S3_k141_45936                        | 1001  | No | NA | 0  | 2 | Not-determined   | Genome-fragment | NA | 0     |
| S5-final-viral-combined_k141_53805   | 2289  | No | NA | 0  | 0 | Not-determined   | Genome-fragment | NA | 0     |
| S5-final-viral-combined_k141_36163   | 2626  | No | NA | 0  | 1 | Not-determined   | Genome-fragment | NA | 0     |
| S5-final-viral-combined_k141_28935   | 5594  | No | NA | 0  | 0 | Not-determined   | Genome-fragment | NA | 0     |
| S5-final-viral-combined_k141_181624  | 6732  | No | NA | 0  | 0 | Not-determined   | Genome-fragment | NA | 0     |
| S5-final-viral-combined_k141_124631  | 2806  | No | NA | 0  | 2 | Not-determined   | Genome-fragment | NA | 0     |
| S5-final-viral-combined_k141_26061   | 3423  | No | NA | 15 | 2 | High-quality     | High-quality    | NA | 98.24 |
| S5-final-viral-combined_k141_213583  | 3193  | No | NA | 0  | 0 | Not-determined   | Genome-fragment | NA | 0     |
| S1-final-viral-combined_k141_317882  | 1597  | No | NA | 0  | 0 | Low-quality      | Genome-fragment | NA | 4.37  |
| S3-final-viral-combined_k141_136329  | 1597  | No | NA | 0  | 0 | Low-quality      | Genome-fragment | NA | 4.22  |
| S5-final-viral-combined_k141_169378  | 1415  | No | NA | 0  | 0 | Not-determined   | Genome-fragment | NA | 0     |
| S5-final-viral-combined_k141_151474  | 2797  | No | NA | 0  | 2 | Not-determined   | Genome-fragment | NA | 0     |
| S5-final-viral-combined_k141_142555  | 8633  | No | NA | 0  | 7 | Not-determined   | Genome-fragment | NA | 0     |
| S7-final-viral-combined_k141_185729  | 1597  | No | NA | 2  | 0 | Low-quality      | Genome-fragment | NA | 3.73  |
| S17-final-viral-combined_k141_49631  | 1597  | No | NA | 0  | 0 | Low-quality      | Genome-fragment | NA | 1.5   |
| S12_k141_309777                      | 1597  | No | NA | 0  | 0 | Low-quality      | Genome-fragment | NA | 0.27  |
| S2-final-viral-combined_k141_116459  | 1597  | No | NA | 0  | 0 | Low-quality      | Genome-fragment | NA | 4.36  |
| S5-final-viral-combined_k141_89126   | 2379  | No | NA | 0  | 1 | Not-determined   | Genome-fragment | NA | 0     |
| S5-final-viral-combined_k141_624541  | 1516  | No | NA | 0  | 1 | Not-determined   | Genome-fragment | NA | 0     |
| S2_k141_139050                       | 1597  | No | NA | 0  | 0 | Low-quality      | Genome-fragment | NA | 1.68  |
| S5-final-viral-combined_k141_89      | 1183  | No | NA | 0  | 0 | Not-determined   | Genome-fragment | NA | 0     |
| S2_k141_140512                       | 1597  | No | NA | 0  | 0 | Low-quality      | Genome-fragment | NA | 3.96  |
| S8-final-viral-combined_k141_151653  | 1597  | No | NA | 0  | 0 | Low-quality      | Genome-fragment | NA | 3.6   |
| S8_k141_194757                       | 1597  | No | NA | 2  | 0 | Low-quality      | Genome-fragment | NA | 2.25  |
| S11-final-viral-combined_k141_59099  | 1598  | No | NA | 2  | 0 | Low-quality      | Genome-fragment | NA | 3.95  |
| S1-final-viral-combined_k141_222287  | 1598  | No | NA | 2  | 0 | Low-quality      | Genome-fragment | NA | 3.06  |
| S1-final-viral-combined_k141_209525  | 1598  | No | NA | 1  | 0 | Low-quality      | Genome-fragment | NA | 2.71  |
| S7-final-viral-combined_k141_196071  | 1598  | No | NA | 2  | 0 | Low-quality      | Genome-fragment | NA | 3.3   |
| S5-final-viral-combined_k141_196058  | 2217  | No | NA | 0  | 2 | Not-determined   | Genome-fragment | NA | 0     |
| S12-final-viral-combined_k141_235525 | 1598  | No | NA | 0  | 2 | Low-quality      | Genome-fragment | NA | 3.8   |
| S5-final-viral-combined_k141_71384   | 5404  | No | NA | 0  | 5 | Not-determined   | Genome-fragment | NA | 2.99  |
| S2-final-viral-combined_k141_63678   | 1598  | No | NA | 0  | 0 | Low-quality      | Genome-fragment | NA | 0     |
| S5-final-viral-combined_k141_115916  | 7860  | No | NA | 0  | 6 | Not-determined   | Genome-fragment | NA | 0     |
| S5-final-viral-combined_k141_1371    | 3411  | No | NA | 0  | 0 | Not-determined   | Genome-fragment | NA | 0     |
| S5-final-viral-combined_k141_115921  | 9822  | No | NA | 0  | 4 | Not-determined   | Genome-fragment | NA | 0     |
| S5-final-viral-combined_k141_106988  | 4438  | No | NA | 0  | 3 | Not-determined   | Genome-fragment | NA | 0     |
| S5-final-viral-combined_k141_107002  | 1465  | No | NA | 0  | 1 | Not-determined   | Genome-fragment | NA | 0     |
| S5-final-viral-combined_k141_151607  | 1091  | No | NA | 0  | 1 | Not-determined   | Genome-fragment | NA | 0     |
| S5-final-viral-combined_k141_20951   | 2562  | No | NA | 0  | 0 | Not-determined   | Genome-fragment | NA | 0     |
| S5-final-viral-combined_k141_1731    | 1027  | No | NA | 0  | 0 | Not-determined   | Genome-fragment | NA | 0     |
| S5-final-viral-combined_k141_107022  | 2353  | No | NA | 0  | 2 | Not-determined   | Genome-fragment | NA | 0     |
| S5-final-viral-combined_k141_268581  | 2412  | No | NA | 0  | 0 | Not-determined   | Genome-fragment | NA | 0     |
| S2-final-viral-combined_k141_24948   | 1598  | No | NA | 3  | 0 | Low-quality      | Genome-fragment | NA | 3.63  |
| S8-final-viral-combined_k141_156541  | 1598  | No | NA | 1  | 0 | Low-quality      | Genome-fragment | NA | 2.85  |
| S5-final-viral-combined_k141_133814  | 20581 | No | NA | 0  | 1 | Not-determined   | Genome-fragment | NA | 0     |
| S1-final-viral-combined_k141_155606  | 1599  | No | NA | 0  | 0 | Low-quality      | Genome-fragment | NA | 3.97  |
| S5-final-viral-combined_k141_196156  | 2663  | No | NA | 0  | 0 | Not-determined   | Genome-fragment | NA | 0     |
| S5-final-viral-combined_k141_2371    | 9412  | No | NA | 0  | 5 | Not-determined   | Genome-fragment | NA | 0     |
| S1-final-viral-combined_k141_138499  | 1599  | No | NA | 0  | 0 | Low-quality      | Genome-fragment | NA | 3.14  |
| S5-final-viral-combined_k141_33567   | 2786  | No | NA | 0  | 1 | Not-determined   | Genome-fragment | NA | 0     |
| S1_k141_27310                        | 1599  | No | NA | 0  | 2 | Low-quality      | Genome-fragment | NA | 0.46  |
| S5-final-viral-combined_k141_164418  | 1599  | No | NA | 0  | 1 | Low-quality      | Genome-fragment | NA | 0.55  |
| S7_k141_129538                       | 1599  | No | NA | 0  | 1 | Low-quality      | Genome-fragment | NA | 0.84  |
| S2_k141_162824                       | 1599  | No | NA | 0  | 1 | Low-quality      | Genome-fragment | NA | 0.31  |
| S4-final-viral-combined_k141_153881  | 1599  | No | NA | 1  | 0 | Low-quality      | Genome-fragment | NA | 2.73  |
| S6-final-viral-combined_k141_92486   | 1599  | No | NA | 0  | 0 | Low-quality      | Genome-fragment | NA | 2.98  |
| S5-final-viral-combined_k141_62485   | 3360  | No | NA | 0  | 2 | Not-determined   | Genome-fragment | NA | 0     |
| S6-final-viral-combined_k141_6504    | 1599  | No | NA | 1  | 0 | Low-quality      | Genome-fragment | NA | 1.51  |
| S5-final-viral-combined_k141_38163   | 1116  | No | NA | 1  | 0 | Not-determined   | Genome-fragment | NA | 0     |
| S8_k141_2214                         | 1599  | No | NA | 0  | 0 | Low-quality      | Genome-fragment | NA | 3.72  |
| S5-final-viral-combined_k141_33622   | 2678  | No | NA | 0  | 1 | Not-determined   | Genome-fragment | NA | 0     |
| S5-final-viral-combined_k141_107111  | 8047  | No | NA | 0  | 0 | Not-determined   | Genome-fragment | NA | 0     |
| S5-final-viral-combined_k141_33629   | 1370  | No | NA | 0  | 0 | Not-determined   | Genome-fragment | NA | 0     |
| S9-final-viral-combined_k141_120991  | 1600  | No | NA | 1  | 0 | Low-quality      | Genome-fragment | NA | 3.03  |
| S5-final-viral-combined_k141_98179   | 13818 | No | NA | 0  | 2 | Not-determined   | Genome-fragment | NA | 0     |
| S17-final-viral-combined_k141_188704 | 1600  | No | NA | 1  | 0 | Low-quality      | Genome-fragment | NA | 4.3   |
| S17_k141_222018                      | 1600  | No | NA | 0  | 1 | Low-quality      | Genome-fragment | NA | 1.19  |
| S9-final-viral-combined_k141_27859   | 1601  | No | NA | 0  | 0 | Low-quality      | Genome-fragment | NA | 2.64  |
| S3-final-viral-combined_k141_70907   | 1601  | No | NA | 0  | 0 | Low-quality      | Genome-fragment | NA | 3.84  |
| S3-final-viral-combined_k141_61537   | 1601  | No | NA | 0  | 0 | Low-quality      | Genome-fragment | NA | 2.92  |
| S7-final-viral-combined_k141_134212  | 1601  | No | NA | 0  | 2 | Low-quality      | Genome-fragment | NA | 3.7   |
| S5-final-viral-combined_k141_80372   | 1804  | No | NA | 0  | 1 | Not-determined   | Genome-fragment | NA | 0     |
| S17-final-viral-combined_k141_141927 | 1601  | No | NA | 0  | 1 | Low-quality      | Genome-fragment | NA | 4.18  |
| S5-final-viral-combined_k141_142683  | 1676  | No | NA | 0  | 1 | Not-determined   | Genome-fragment | NA | 0     |
| S5-final-viral-combined_k141_33686   | 2112  | No | NA | 0  | 0 | Not-determined   | Genome-fragment | NA | 0     |
| S17-final-viral-combined_k141_121509 | 1601  | No | NA | 1  | 0 | Low-quality      | Genome-fragment | NA | 3.01  |
| S12-final-viral-combined_k141_187986 | 1601  | No | NA | 1  | 0 | Low-quality      | Genome-fragment | NA | 3.63  |
| S5-final-viral-combined_k141_142720  | 2921  | No | NA | 0  | 0 | Not-determined   | Genome-fragment | NA | 0     |
| S5-final-viral-combined_k141_419     | 1479  | No | NA | 0  | 1 | Not-determined   | Genome-fragment | NA | 0     |
| S5-final-viral-combined_k141_178365  | 1627  | No | NA | 0  | 0 | Not-determined   | Genome-fragment | NA | 0     |
| S5-final-viral-combined_k141_187241  | 1606  | No | NA | 0  | 2 | Not-determined   | Genome-fragment | NA | 0     |
| S5-final-viral-combined_k141_124501  | 2646  | No | NA | 0  | 0 | Not-determined   | Genome-fragment | NA | 0     |
| S5-final-viral-combined_k141_116109  | 5267  | No | NA | 0  | 2 | Not-determined   | Genome-fragment | NA | 0     |
| S5-final-viral-combined_k141_124965  | 1260  | No | NA | 0  | 1 | Not-determined   | Genome-fragment | NA | 0     |
| S5-final-viral-combined_k141_715714  | 2476  | No | NA | 0  | 0 | Not-determined   | Genome-fragment | NA | 0     |
| S5-final-viral-combined_k141_178431  | 2593  | No | NA | 0  | 2 | Not-determined   | Genome-fragment | NA | 0     |
| S5-final-viral-combined_k141_169349  | 1173  | No | NA | 0  | 0 | Not-determined   | Genome-fragment | NA | 0     |
| S5-final-viral-combined_k141_124869  | 6104  | No | NA | 0  | 1 | Not-determined   | Genome-fragment | NA | 0     |
| S5-final-viral-combined_k141_107242  | 3492  | No | NA | 0  | 3 | Not-determined   | Genome-fragment | NA | 0     |
| S12-final-viral-combined_k141_209607 | 1601  | No | NA | 0  | 0 | Low-quality      | Genome-fragment | NA | 3.44  |
| S5-final-viral-combined_k141_116138  | 5394  | No | NA | 0  | 0 | Not-determined   | Genome-fragment | NA | 0     |
| S4-final-viral-combined_k141_62445   | 1601  | No | NA | 0  | 1 | Low-quality      | Genome-fragment | NA | 0.9   |
| S5-final-viral-combined_k141_124987  | 1496  | No | NA | 0  | 0 | Not-determined   | Genome-fragment | NA | 0     |
| S8-final-viral-combined_k141_268368  | 1601  | No | NA | 0  | 0 | Low-quality      | Genome-fragment | NA | 3.23  |
| S5-final-viral-combined_k141_116143  | 2367  | No | NA | 0  | 1 | Not-determined   | Genome-fragment | NA | 0     |
| S5-final-viral-combined_k141_116144  | 2156  | No | NA | 0  | 1 | Not-determined   | Genome-fragment | NA | 0     |
| S9-final-viral-combined_k141_64942   | 1602  | No | NA | 2  | 0 | Low-quality      | Genome-fragment | NA | 3.13  |
| S11-final-viral-combined_k141_208039 | 1602  | No | NA | 0  | 0 | Low-quality      | Genome-fragment | NA | 3.42  |
| S12_k141_173985                      | 1602  | No | NA | 0  | 1 | Low-quality      | Genome-fragment | NA | 2.02  |
| S5-final-viral-combined_k141_62591   | 1707  | No | NA | 0  | 5 | Not-determined   | Genome-fragment | NA | 0     |
| S5-final-viral-combined_k141_53768   | 1760  | No | NA | 0  | 0 | Not-determined   | Genome-fragment | NA | 0     |
| S4-final-viral-combined_k141_25525   | 1     |    |    |    |   |                  |                 |    |       |



|                                      |           |       |     |       |    |    |                |                 |    |       |       |
|--------------------------------------|-----------|-------|-----|-------|----|----|----------------|-----------------|----|-------|-------|
| S12-final-viral-combined_k141_261553 | [full]    | 1604  | No  | NA    | 1  | 0  | Low-quality    | Genome-fragment | NA | 4.41  | 0     |
| S5-final-viral-combined_k141_24771   | [full]    | 2815  | No  | NA    | 0  | 1  | Not-determined | Genome-fragment | NA | 0     | 0     |
| S12-final-viral-combined_k141_31587  | [full]    | 1604  | No  | NA    | 0  | 1  | Low-quality    | Genome-fragment | NA | 0.83  | 0     |
| S5-final-viral-combined_k141_142906  | [full]    | 2643  | No  | NA    | 0  | 3  | Not-determined | Genome-fragment | NA | 0     | 0     |
| S2-final-viral-combined_k141_24619   | [full]    | 1604  | No  | NA    | 0  | 0  | Low-quality    | Genome-fragment | NA | 4.77  | 0     |
| S5-final-viral-combined_k141_71823   | [full]    | 3167  | No  | NA    | 0  | 0  | Not-determined | Genome-fragment | NA | 0     | 0     |
| S4-final-viral-combined_k141_151061  | [full]    | 1604  | No  | NA    | 0  | 0  | Low-quality    | Genome-fragment | NA | 0.89  | 0     |
| S8-final-viral-combined_k141_230509  | [full]    | 1604  | No  | NA    | 1  | 0  | Low-quality    | Genome-fragment | NA | 4.96  | 0     |
| S11-final-viral-combined_k141_114180 | [full]    | 1605  | No  | NA    | 0  | 1  | Low-quality    | Genome-fragment | NA | 1.6   | 0     |
| S5-final-viral-combined_k141_80625   | [full]    | 1349  | No  | NA    | 0  | 1  | Not-determined | Genome-fragment | NA | 0     | 0     |
| S5-final-viral-combined_k141_143002  | [full]    | 2995  | No  | NA    | 0  | 1  | Not-determined | Genome-fragment | NA | 0     | 0     |
| S5-final-viral-combined_k141_44832   | [full]    | 3535  | No  | NA    | 0  | 1  | Not-determined | Genome-fragment | NA | 0     | 0     |
| S2-final-viral-combined_k141_160431  | [full]    | 1605  | No  | NA    | 0  | 0  | Low-quality    | Genome-fragment | NA | 2.74  | 0     |
| S9-final-viral-combined_k141_47875   | [full]    | 1606  | Yes | 860   | 1  | 1  | Low-quality    | Genome-fragment | NA | 2.12  | 46.45 |
| S5-final-viral-combined_k141_772     | [full]    | 7307  | No  | NA    | 0  | 7  | Not-determined | Genome-fragment | NA | 0     | 0     |
| S5-final-viral-combined_k141_44888   | [full]    | 1142  | No  | NA    | 0  | 1  | Not-determined | Genome-fragment | NA | 0     | 0     |
| S11-final-viral-combined_k141_167046 | [full]    | 1606  | No  | NA    | 0  | 0  | Low-quality    | Genome-fragment | NA | 3.38  | 0     |
| S1-final-viral-combined_k141_162015  | [full]    | 1606  | No  | NA    | 0  | 0  | Low-quality    | Genome-fragment | NA | 3.38  | 0     |
| S5-final-viral-combined_k141_178751  | [full]    | 1606  | No  | NA    | 0  | 1  | Low-quality    | Genome-fragment | NA | 2.4   | 0     |
| S5-final-viral-combined_k141_107415  | [full]    | 1584  | No  | NA    | 0  | 1  | Not-determined | Genome-fragment | NA | 0     | 0     |
| S5-final-viral-combined_k141_169644  | [full]    | 1676  | No  | NA    | 0  | 2  | Not-determined | Genome-fragment | NA | 0     | 0     |
| S1_k141_271029                       | [full]    | 1606  | No  | NA    | 0  | 0  | Low-quality    | Genome-fragment | NA | 2.14  | 0     |
| S5-final-viral-combined_k141_98390   | [full]    | 14286 | No  | NA    | 0  | 6  | Not-determined | Genome-fragment | NA | 0     | 0     |
| S5-final-viral-combined_k141_9583    | [full]    | 2594  | No  | NA    | 0  | 1  | Not-determined | Genome-fragment | NA | 0     | 0     |
| S5_k141_67935                        | [full]    | 1606  | No  | NA    | 0  | 2  | Low-quality    | Genome-fragment | NA | 3.62  | 0     |
| S7_k141_238440                       | [full]    | 1606  | No  | NA    | 0  | 0  | Low-quality    | Genome-fragment | NA | 0.26  | 0     |
| S5-final-viral-combined_k141_80730   | [full]    | 2469  | No  | NA    | 0  | 2  | Not-determined | Genome-fragment | NA | 0     | 0     |
| S5-final-viral-combined_k141_143100  | [full]    | 1479  | No  | NA    | 0  | 2  | Not-determined | Genome-fragment | NA | 0     | 0     |
| S5-final-viral-combined_k141_71829   | [full]    | 2217  | No  | NA    | 0  | 1  | Not-determined | Genome-fragment | NA | 0     | 0     |
| S5-final-viral-combined_k141_18356   | [full]    | 34910 | Yes | 21165 | 16 | 8  | Medium-quality | Genome-fragment | NA | 67.13 | 39.37 |
| S2-final-viral-combined_k141_120005  | [full]    | 1606  | No  | NA    | 2  | 0  | Low-quality    | Genome-fragment | NA | 4.54  | 0     |
| S4_k141_24514                        | [full]    | 1606  | No  | NA    | 0  | 1  | Low-quality    | Genome-fragment | NA | 1.85  | 0     |
| S5-final-viral-combined_k141_169713  | [full]    | 1394  | No  | NA    | 0  | 0  | Not-determined | Genome-fragment | NA | 0     | 0     |
| S8_k141_239297                       | [full]    | 1606  | No  | NA    | 1  | 0  | Low-quality    | Genome-fragment | NA | 4.98  | 0     |
| S5-final-viral-combined_k141_169735  | [full]    | 4912  | No  | NA    | 0  | 2  | Not-determined | Genome-fragment | NA | 0     | 0     |
| S5-final-viral-combined_k141_145367  | [full]    | 1607  | No  | NA    | 0  | 1  | Low-quality    | Genome-fragment | NA | 0.8   | 0     |
| S5-final-viral-combined_k141_33324   | [full]    | 1607  | No  | NA    | 0  | 0  | Low-quality    | Genome-fragment | NA | 2.69  | 0     |
| S7-final-viral-combined_k141_11997   | [full]    | 1607  | No  | NA    | 0  | 0  | Low-quality    | Genome-fragment | NA | 4.01  | 0     |
| S7-final-viral-combined_k141_66638   | [full]    | 1607  | No  | NA    | 0  | 0  | Low-quality    | Genome-fragment | NA | 3.93  | 0     |
| S5-final-viral-combined_k141_71900   | [full]    | 1021  | No  | NA    | 0  | 1  | Not-determined | Genome-fragment | NA | 0     | 0     |
| S5-final-viral-combined_k141_116289  | [full]    | 1681  | No  | NA    | 0  | 1  | Not-determined | Genome-fragment | NA | 0     | 0     |
| S5-final-viral-combined_k141_116314  | [full]    | 1922  | No  | NA    | 0  | 2  | Not-determined | Genome-fragment | NA | 0     | 0     |
| S5-final-viral-combined_k141_89621   | [full]    | 2253  | No  | NA    | 0  | 1  | Not-determined | Genome-fragment | NA | 0     | 0     |
| S7-final-viral-combined_k141_220414  | [IRZgene] | 1607  | No  | NA    | 2  | 0  | Low-quality    | Genome-fragment | NA | 2.51  | 0     |
| S5-final-viral-combined_k141_178485  | [full]    | 1449  | No  | NA    | 0  | 1  | Not-determined | Genome-fragment | NA | 0     | 0     |
| S5-final-viral-combined_k141_205349  | [full]    | 7131  | No  | NA    | 0  | 1  | Not-determined | Genome-fragment | NA | 0     | 0     |
| S5-final-viral-combined_k141_89643   | [full]    | 1210  | No  | NA    | 0  | 1  | Not-determined | Genome-fragment | NA | 0     | 0     |
| S5-final-viral-combined_k141_80788   | [full]    | 1533  | No  | NA    | 0  | 1  | Not-determined | Genome-fragment | NA | 0     | 0     |
| S4-final-viral-combined_k141_107810  | [full]    | 1607  | No  | NA    | 0  | 0  | Low-quality    | Genome-fragment | NA | 2.76  | 0     |
| S3_k141_72312                        | [full]    | 1608  | No  | NA    | 0  | 0  | Low-quality    | Genome-fragment | NA | 0.74  | 0     |
| S7_k141_51801                        | [full]    | 1608  | No  | NA    | 0  | 1  | Low-quality    | Genome-fragment | NA | 2.61  | 0     |
| S17-final-viral-combined_k141_122285 | [full]    | 1608  | No  | NA    | 0  | 1  | Low-quality    | Genome-fragment | NA | 0.59  | 0     |
| S5-final-viral-combined_k141_27141   | [full]    | 1053  | No  | NA    | 0  | 0  | Not-determined | Genome-fragment | NA | 0     | 0     |
| S17-final-viral-combined_k141_119050 | [full]    | 1608  | No  | NA    | 0  | 2  | Low-quality    | Genome-fragment | NA | 0.84  | 0     |
| S5-final-viral-combined_k141_89636   | [full]    | 1848  | No  | NA    | 0  | 0  | Not-determined | Genome-fragment | NA | 0     | 0     |
| S5-final-viral-combined_k141_7980    | [full]    | 2052  | No  | NA    | 0  | 2  | Not-determined | Genome-fragment | NA | 0     | 0     |
| S5-final-viral-combined_k141_1057    | [full]    | 2172  | No  | NA    | 0  | 2  | Not-determined | Genome-fragment | NA | 0     | 0     |
| S5-final-viral-combined_k141_89721   | [full]    | 1138  | No  | NA    | 0  | 1  | Not-determined | Genome-fragment | NA | 0     | 0     |
| S12-final-viral-combined_k141_115100 | [full]    | 1608  | Yes | 807   | 1  | 1  | Low-quality    | Genome-fragment | NA | 1.16  | 48.81 |
| S5-final-viral-combined_k141_89727   | [full]    | 1350  | No  | NA    | 0  | 0  | Not-determined | Genome-fragment | NA | 0     | 0     |
| S5-final-viral-combined_k141_169894  | [full]    | 5190  | No  | NA    | 0  | 4  | Not-determined | Genome-fragment | NA | 0     | 0     |
| S2-final-viral-combined_k141_80377   | [full]    | 1608  | No  | NA    | 0  | 0  | Low-quality    | Genome-fragment | NA | 4.22  | 0     |
| S5-final-viral-combined_k141_107589  | [full]    | 2893  | No  | NA    | 0  | 0  | Not-determined | Genome-fragment | NA | 0     | 0     |
| S2-final-viral-combined_k141_16041   | [full]    | 1608  | No  | NA    | 0  | 2  | Low-quality    | Genome-fragment | NA | 2.25  | 0     |
| S4_k141_115092                       | [full]    | 1608  | No  | NA    | 0  | 1  | Low-quality    | Genome-fragment | NA | 0.48  | 0     |
| S5-final-viral-combined_k141_9825    | [full]    | 1724  | No  | NA    | 0  | 2  | Not-determined | Genome-fragment | NA | 0     | 0     |
| S5-final-viral-combined_k141_205409  | [full]    | 1698  | No  | NA    | 0  | 1  | Not-determined | Genome-fragment | NA | 0     | 0     |
| S5-final-viral-combined_k141_152066  | [full]    | 1435  | No  | NA    | 0  | 2  | Not-determined | Genome-fragment | NA | 0     | 0     |
| S8-final-viral-combined_k141_237950  | [full]    | 1608  | No  | NA    | 0  | 0  | Low-quality    | Genome-fragment | NA | 2.85  | 0     |
| S8_k141_251161                       | [full]    | 1608  | No  | NA    | 0  | 0  | Low-quality    | Genome-fragment | NA | 3.37  | 0     |
| S8_k141_261239                       | [full]    | 1608  | No  | NA    | 0  | 2  | Low-quality    | Genome-fragment | NA | 2.79  | 0     |
| S5-final-viral-combined_k141_196767  | [full]    | 1214  | No  | NA    | 0  | 2  | Not-determined | Genome-fragment | NA | 0     | 0     |
| S5-final-viral-combined_k141_169978  | [full]    | 5156  | No  | NA    | 0  | 1  | Not-determined | Genome-fragment | NA | 0     | 0     |
| S5-final-viral-combined_k141_82885   | [full]    | 1617  | No  | NA    | 0  | 2  | Not-determined | Genome-fragment | NA | 0     | 0     |
| S5-final-viral-combined_k141_45124   | [full]    | 8462  | No  | NA    | 0  | 3  | Not-determined | Genome-fragment | NA | 0     | 0     |
| S5-final-viral-combined_k141_36182   | [full]    | 1469  | No  | NA    | 0  | 1  | Not-determined | Genome-fragment | NA | 0     | 0     |
| S5-final-viral-combined_k141_26779   | [full]    | 1609  | No  | NA    | 2  | 0  | Low-quality    | Genome-fragment | NA | 3.5   | 0     |
| S5-final-viral-combined_k141_87108   | [full]    | 1609  | Yes | 656   | 1  | 1  | Low-quality    | Genome-fragment | NA | 0.44  | 59.23 |
| S17-final-viral-combined_k141_104264 | [full]    | 1609  | No  | NA    | 0  | 0  | Low-quality    | Genome-fragment | NA | 0     | 0     |
| S17-final-viral-combined_k141_218268 | [full]    | 1609  | No  | NA    | 2  | 0  | Low-quality    | Genome-fragment | NA | 4.21  | 0     |
| S5-final-viral-combined_k141_36228   | [full]    | 1965  | No  | NA    | 0  | 1  | Not-determined | Genome-fragment | NA | 0     | 0     |
| S5-final-viral-combined_k141_170011  | [full]    | 1536  | No  | NA    | 0  | 2  | Not-determined | Genome-fragment | NA | 0     | 0     |
| S17-final-viral-combined_k141_241362 | [full]    | 1609  | No  | NA    | 0  | 1  | Low-quality    | Genome-fragment | NA | 4.55  | 0     |
| S4-final-viral-combined_k141_164359  | [full]    | 1609  | No  | NA    | 0  | 0  | Low-quality    | Genome-fragment | NA | 2.64  | 0     |
| S4-final-viral-combined_k141_110637  | [full]    | 1609  | No  | NA    | 0  | 0  | Low-quality    | Genome-fragment | NA | 2.31  | 0     |
| S5-final-viral-combined_k141_45179   | [full]    | 14157 | No  | NA    | 0  | 9  | Not-determined | Genome-fragment | NA | 0     | 0     |
| S5-final-viral-combined_k141_36254   | [full]    | 2420  | No  | NA    | 0  | 2  | Not-determined | Genome-fragment | NA | 0     | 0     |
| S5-final-viral-combined_k141_205496  | [full]    | 2758  | No  | NA    | 0  | 0  | Not-determined | Genome-fragment | NA | 0     | 0     |
| S8_k141_261462                       | [full]    | 1609  | No  | NA    | 0  | 0  | Low-quality    | Genome-fragment | NA | 1.64  | 0     |
| S5-final-viral-combined_k141_125375  | [full]    | 2732  | No  | NA    | 0  | 3  | Not-determined | Genome-fragment | NA | 0     | 0     |
| S9-final-viral-combined_k141_126669  | [full]    | 1610  | No  | NA    | 2  | 0  | Low-quality    | Genome-fragment | NA | 4.13  | 0     |
| S5-final-viral-combined_k141_36282   | [full]    | 1617  | No  | NA    | 0  | 2  | Not-determined | Genome-fragment | NA | 0     | 0     |
| S5-final-viral-combined_k141_54116   | [full]    | 2015  | No  | NA    | 0  | 0  | Not-determined | Genome-fragment | NA | 0     | 0     |
| S5-final-viral-combined_k141_1229    | [full]    | 1243  | No  | NA    | 0  | 0  | Not-determined | Genome-fragment | NA | 0     | 0     |
| S5-final-viral-combined_k141_27242   | [full]    | 3075  | No  | NA    | 0  | 3  | Not-determined | Genome-fragment | NA | 0     | 0     |
| S5-final-viral-combined_k141_89990   | [full]    | 3088  | No  | NA    | 0  | 2  | Not-determined | Genome-fragment | NA | 0     | 0     |
| S5-final-viral-combined_k141_107779  | [full]    | 7150  | No  | NA    | 0  | 3  | Not-determined | Genome-fragment | NA | 0     | 0     |
| S5-final-viral-combined_k141_152083  | [full]    | 7883  | No  | NA    | 0  | 3  | Not-determined | Genome-fragment | NA | 0     | 0     |
| S9_k141_80983                        | [full]    | 1610  | No  | NA    | 0  | 0  | Low-quality    | Genome-fragment | NA | 1.14  | 0     |
| S11-final-viral-combined_k141_154312 | [full]    | 1610  | No  | NA    | 2  | 0  | Low-quality    | Genome-fragment | NA | 3.77  | 0     |
| S5-final-viral-combined_k141_178772  | [full]    | 3068  | No  | NA    | 0  | 2  | Not-determined | Genome-fragment | NA | 0     | 0     |
| S5-final-viral-combined_k141_12911   | [full]    | 1916  | No  | NA    | 0  | 2  | Not-determined | Genome-fragment | NA | 0     | 0     |
| S5-final-viral-combined_k141_18504   | [full]    | 1361  | No  | NA    | 0  | 2  | Not-determined | Genome-fragment | NA | 0     | 0     |
| S5-final-viral-combined_k141_143327  | [full]    | 5893  | No  | NA    | 0  | 1  | Not-determined | Genome-fragment | NA | 0     | 0     |
| S1-final-viral-combined_k141_117926  | [full]    | 1610  | No  | NA    | 0  | 0  | Low-quality    | Genome-fragment | NA | 1.01  | 0     |
| S1_k141_311840                       | [full]    | 1610  | No  | NA    | 0  | 1  | Low-quality    | Genome-fragment | NA | 0.35  | 0     |
| S5-final-viral-combined_k141_108039  | [IRZgene] | 1610  | No  | NA    | 1  | 0  | Low-quality    | Genome-fragment | NA | 1.6   | 0     |
| S5-final-viral-combined_k141_80873   | [full]    | 1148  | No  | NA    | 0  | 1  | Not-determined | Genome-fragment | NA | 0     | 0     |
| S7-final-viral-combined_k141_13316   | [full]    | 1610  | No  | NA    | 0  | 0  | Low-quality    | Genome-fragment | NA | 0.78  | 0     |
| S5-final-viral-combined_k141_80892   | [full]    | 1084  | No  | NA    | 0  | 2  | Not-determined | Genome-fragment | NA | 0     | 0     |
| S12-final-viral-combined_k141_236151 | [full]    | 1610  | No  | NA    | 0  | 1  | Low-quality    | Genome-fragment | NA | 1.64  | 0     |
| S12-final-viral-combined_k141_37354  | [full]    | 1610  | No  | NA    | 0  | 1  | Low-quality    | Genome-fragment | NA | 0.98  | 0     |
| S5-final-viral-combined_k141_143364  | [full]    | 1194  | No  | NA    | 0  | 0  | Not-determined | Genome-fragment | NA | 0     | 0     |
| S2-final-viral-combined_k141_80608   | [full]    | 1610  | No  | NA    | 0  | 0  | Low-quality    | Genome-fragment | NA | 2.36  | 0     |
| S5-final-viral-combined_k141_80906   | [full]    | 1125  | No  | NA    | 0  | 3  | Not-determined | Genome-fragment | NA | 0     | 0     |
| S6-final-viral-combined_k141_106419  | [full]    | 1610  | No  | NA    | 1  | 0  | Low-quality    | Genome-fragment | NA | 2.72  | 0     |
| S5-final-viral-combined_k141_187757  | [full]    | 16334 | No  | NA    | 0  | 15 | Not-determined | Genome-fragment | NA | 0     | 0     |
| S5-final-viral-combined_k141_44284   | [full]    | 1581  | No  | NA    | 0  | 0  | Not-determined | Genome-fragment | NA | 0     | 0     |
| S6-final-viral-combined_k141_50262   | [full]    | 1610  | No  | NA    | 1  | 0  | Low-quality    | Genome-fragment | NA | 1.04  | 0     |
| S8-final-viral-combined_k141_49693   | [full]    | 1610  | No  | NA    | 0  | 1  | Low-quality    | Genome-fragment | NA | 2.52  | 0     |
| S5-final-viral-combined_k141_43551   | [full]    | 4413  | No  | NA    | 0  | 1  | Not-determined | Genome-fragment | NA | 0     | 0     |
| S5-final-viral-combined_k141_161511  | [full]    | 18588 | Yes | 3314  | 21 | 10 | Medium-quality | Genome-fragment | NA | 59.59 | 82.2  |
| S5-final-v                           |           |       |     |       |    |    |                |                 |    |       |       |



|                                                |        |     |       |       |     |                |                 |                 |      |       |       |
|------------------------------------------------|--------|-----|-------|-------|-----|----------------|-----------------|-----------------|------|-------|-------|
| S5-final-viral-combined_k141_90315]] [full     | 102707 | Yes |       | 71984 | 12  | 25             | High-quality    | High-quality    | NA   | 100   | 29.91 |
| S5-final-viral-combined_k141_81050]] [full     | 2649   | No  | NA    |       | 0   | 1              | Not-determined  | Genome-fragment | NA   | 0     | 0     |
| S5-final-viral-combined_k141_143597]] [full    | 2114   | No  | NA    |       | 0   | 1              | Not-determined  | Genome-fragment | NA   | 0     | 0     |
| S1-final-viral-combined_k141_111341]] [full    | 1613   | No  | NA    |       | 1   | 0              | Low-quality     | Genome-fragment | NA   | 4.22  | 0     |
| S5-final-viral-combined_k141_143599]] [full    | 1414   | No  | NA    |       | 0   | 2              | Not-determined  | Genome-fragment | NA   | 0     | 0     |
| S5-final-viral-combined_k141_197056]] [full    | 2601   | No  | NA    |       | 0   | 2              | Not-determined  | Genome-fragment | NA   | 0     | 0     |
| S3_k141_61174                                  | 1613   | No  | NA    |       | 0   | 0              | Low-quality     | Genome-fragment | NA   | 0.74  | 0     |
| S7-final-viral-combined_k141_236427]] [full    | 1613   | No  | NA    |       | 0   | 0              | Low-quality     | Genome-fragment | NA   | 13.58 | 0     |
| S7-final-viral-combined_k141_175137]] [H2gene  | 1613   | No  | NA    |       | 1   | 0              | Low-quality     | Genome-fragment | NA   | 3.92  | 0     |
| S17-final-viral-combined_k141_100809]] [full   | 1613   | No  | NA    |       | 1   | 0              | Low-quality     | Genome-fragment | NA   | 4.21  | 0     |
| S17-final-viral-combined_k141_255271]] [H2gene | 1613   | No  | NA    |       | 2   | 0              | Low-quality     | Genome-fragment | NA   | 5.33  | 0     |
| S5-final-viral-combined_k141_27611]] [full     | 6667   | No  | NA    |       | 0   | 4              | Not-determined  | Genome-fragment | NA   | 1.9   | 0     |
| S12-final-viral-combined_k141_376196]] [full   | 1613   | No  | NA    |       | 0   | 1              | Low-quality     | Genome-fragment | NA   | 3.85  | 0     |
| S12-final-viral-combined_k141_33312]] [full    | 1613   | No  | NA    |       | 0   | 0              | Low-quality     | Genome-fragment | NA   | 1.18  | 0     |
| S12_k141_216787                                | 1613   | No  | NA    |       | 0   | 0              | Low-quality     | Genome-fragment | NA   | 2.67  | 0     |
| S5-final-viral-combined_k141_197093]] [full    | 3609   | No  | NA    |       | 0   | 1              | Not-determined  | Genome-fragment | NA   | 0     | 0     |
| S5-final-viral-combined_k141_81190]] [full     | 2519   | No  | NA    |       | 0   | 0              | Not-determined  | Genome-fragment | NA   | 0     | 0     |
| S5-final-viral-combined_k141_19051]] [full     | 1945   | No  | NA    |       | 0   | 2              | Not-determined  | Genome-fragment | NA   | 3.09  | 0     |
| S11-final-viral-combined_k141_165940]] [full   | 1614   | No  | NA    |       | 0   | 0              | Low-quality     | Genome-fragment | NA   | 3.37  | 0     |
| S1-final-viral-combined_k141_56955]] [full     | 1614   | No  | NA    |       | 0   | 0              | Low-quality     | Genome-fragment | NA   | 3.03  | 0     |
| S7_k141_114306                                 | 6732   | No  | NA    |       | 0   | 2              | Not-determined  | Genome-fragment | NA   | 3.78  | 0     |
| S5-final-viral-combined_k141_108205]] [full    | 1614   | No  | NA    |       | 0   | 0              | Low-quality     | Genome-fragment | NA   | 2.08  | 0     |
| S17-final-viral-combined_k141_170059]] [full   | 1614   | No  | NA    |       | 0   | 0              | Low-quality     | Genome-fragment | NA   | 2.69  | 0     |
| S5-final-viral-combined_k141_152512]] [full    | 3616   | No  | NA    |       | 0   | 3              | Not-determined  | Genome-fragment | NA   | 2.68  | 0     |
| S12-final-viral-combined_k141_343801]] [H2gene | 1614   | No  | NA    |       | 2   | 0              | Low-quality     | Genome-fragment | NA   | 1.92  | 0     |
| S2-final-viral-combined_k141_17781]] [full     | 1614   | No  | NA    |       | 0   | 1              | Low-quality     | Genome-fragment | NA   | 0     | 0     |
| S6_k141_89835                                  | 1614   | No  | NA    |       | 1   | 0              | Low-quality     | Genome-fragment | NA   | 0     | 0     |
| S8-final-viral-combined_k141_27461]] [full     | 1614   | No  | NA    |       | 1   | 0              | Low-quality     | Genome-fragment | NA   | 0     | 0     |
| S5-final-viral-combined_k141_10168]] [full     | 4713   | No  | NA    |       | 0   | 2              | Not-determined  | Genome-fragment | NA   | 2.75  | 0     |
| S5-final-viral-combined_k141_81301]] [full     | 1783   | No  | NA    |       | 0   | 0              | Not-determined  | Genome-fragment | NA   | 0     | 0     |
| S5-final-viral-combined_k141_161329]] [full    | 3690   | No  | NA    |       | 0   | 1              | Not-determined  | Genome-fragment | NA   | 0     | 0     |
| S8-final-viral-combined_k141_295950]] [H2gene  | 1614   | No  | NA    |       | 0   | 0              | Low-quality     | Genome-fragment | NA   | 0     | 0     |
| S5-final-viral-combined_k141_205873]] [full    | 3171   | No  | NA    |       | 0   | 2              | Not-determined  | Genome-fragment | NA   | 4.45  | 0     |
| S11_k141_264601                                | 1615   | No  | NA    |       | 1   | 0              | Low-quality     | Genome-fragment | NA   | 3.99  | 0     |
| S4-final-viral-combined_k141_134092]] [full    | 1615   | No  | NA    |       | 0   | 0              | Low-quality     | Genome-fragment | NA   | 2.68  | 0     |
| S1-final-viral-combined_k141_63190]] [full     | 1615   | No  | NA    |       | 0   | 2              | Low-quality     | Genome-fragment | NA   | 0.75  | 0     |
| S7_k141_233094                                 | 1615   | No  | NA    |       | 0   | 0              | Low-quality     | Genome-fragment | NA   | 3.39  | 0     |
| S12_k141_394396                                | 1615   | No  | NA    |       | 0   | 2              | Not-determined  | Genome-fragment | NA   | 2.92  | 0     |
| S5-final-viral-combined_k141_190088]] [full    | 5609   | No  | NA    |       | 1   | 0              | Low-quality     | Genome-fragment | NA   | 66.11 | 49.56 |
| S9-final-viral-combined_k141_30925]] [H2gene   | 1616   | No  | NA    |       | 0   | 0              | Low-quality     | Genome-fragment | NA   | 0     | 0     |
| S5-final-viral-combined_k141_170493]] [full    | 103549 | Yes | NA    | 52229 | 23  | 27             | Medium-quality  | Genome-fragment | NA   | 0     | 0     |
| S5-final-viral-combined_k141_170493]] [full    | 11216  | No  | NA    |       | 0   | 1              | Not-determined  | Genome-fragment | NA   | 0     | 0     |
| S5-final-viral-combined_k141_108301]] [full    | 1152   | No  | NA    |       | 0   | 1              | Not-determined  | Genome-fragment | NA   | 3.39  | 0     |
| S11-final-viral-combined_k141_46118]] [full    | 1616   | No  | NA    |       | 1   | 0              | Low-quality     | Genome-fragment | NA   | 68.83 | 0     |
| S5-final-viral-combined_k141_134731]] [full    | 1261   | No  | NA    |       | 0   | 0              | Not-determined  | Genome-fragment | NA   | 0     | 0     |
| S5-final-viral-combined_k141_197186]] [full    | 32221  | No  | NA    |       | 0   | 4              | Medium-quality  | Genome-fragment | NA   | 0     | 0     |
| S5-final-viral-combined_k141_16653]] [full     | 2618   | No  | NA    |       | 0   | 1              | Not-determined  | Genome-fragment | NA   | 3.62  | 0     |
| S5-final-viral-combined_k141_134832]] [full    | 1446   | No  | NA    |       | 0   | 0              | Not-determined  | Genome-fragment | NA   | 3.93  | 0     |
| S11-final-viral-combined_k141_258431]] [full   | 1616   | No  | NA    |       | 0   | 0              | Low-quality     | Genome-fragment | NA   | 1.23  | 45.48 |
| S11-final-viral-combined_k141_203828]] [full   | 1616   | Yes | 881   | 1     | 1   | 0              | Low-quality     | Genome-fragment | NA   | 0     | 0     |
| S5-final-viral-combined_k141_205977]] [full    | 4193   | No  | NA    |       | 0   | 4              | Not-determined  | Genome-fragment | NA   | 0     | 0     |
| S5-final-viral-combined_k141_18714]] [full     | 2340   | No  | NA    |       | 0   | 2              | Not-determined  | Genome-fragment | NA   | 0     | 0     |
| S5-final-viral-combined_k141_45774]] [full     | 2133   | No  | NA    |       | 0   | 2              | Not-determined  | Genome-fragment | NA   | 2.7   | 0     |
| S1-final-viral-combined_k141_235276]] [full    | 1616   | No  | NA    |       | 0   | 2              | Low-quality     | Genome-fragment | NA   | 2.04  | 0     |
| S5-final-viral-combined_k141_161434]] [full    | 1569   | No  | NA    |       | 1   | 0              | Not-determined  | Genome-fragment | NA   | 0     | 0     |
| S5-final-viral-combined_k141_157877]] [full    | 1616   | No  | NA    |       | 0   | 1              | Not-determined  | Genome-fragment | NA   | 4.18  | 0     |
| S5-final-viral-combined_k141_81424]] [full     | 1005   | No  | NA    |       | 0   | 0              | Low-quality     | Genome-fragment | NA   | 0.43  | 0     |
| S3-final-viral-combined_k141_27975]] [full     | 1616   | No  | NA    |       | 0   | 0              | Low-quality     | Genome-fragment | NA   | 0.17  | 0     |
| S3-final-viral-combined_k141_78005]] [full     | 1616   | No  | NA    |       | 0   | 0              | Low-quality     | Genome-fragment | NA   | 52.6  | 0     |
| S3_k141_133898                                 | 1388   | No  | NA    |       | 0   | 0              | Not-determined  | Genome-fragment | NA   | 100   | 75.54 |
| S5-final-viral-combined_k141_143886]] [full    | 26509  | No  | NA    |       | 12  | 124            | Complete        | High-quality    | NA   | 3.1   | 0     |
| S5-final-viral-combined_k141_117095]] [full    | 237438 | Yes | 58078 | 34    | 124 | Complete       | High-quality    | Genome-fragment | NA   | 0     | 0     |
| S5-final-viral-combined_k141_72410]] [full     | 1616   | No  | NA    |       | 0   | 1              | Low-quality     | Genome-fragment | NA   | 0     | 0     |
| S17-final-viral-combined_k141_149353]] [full   | 1112   | No  | NA    |       | 0   | 0              | Not-determined  | Genome-fragment | NA   | 0     | 0     |
| S5-final-viral-combined_k141_22477]] [full     | 2070   | No  | NA    |       | 0   | 0              | Not-determined  | Genome-fragment | NA   | 0     | 0     |
| S5-final-viral-combined_k141_170708]] [full    | 16674  | No  | NA    |       | 0   | 5              | Not-determined  | Genome-fragment | NA   | 1.38  | 0     |
| S17-final-viral-combined_k141_196986]] [full   | 1616   | No  | NA    |       | 0   | 2              | Low-quality     | Genome-fragment | NA   | 4.06  | 0     |
| S17-final-viral-combined_k141_266335]] [full   | 1616   | No  | NA    |       | 0   | 0              | Low-quality     | Genome-fragment | NA   | 2.1   | 0     |
| S17_k141_55676                                 | 1616   | No  | NA    |       | 0   | 0              | Low-quality     | Genome-fragment | NA   | 2.17  | 0     |
| S12-final-viral-combined_k141_127390]] [full   | 1510   | No  | NA    |       | 0   | 1              | Not-determined  | Genome-fragment | NA   | 1.28  | 0     |
| S12_k141_374118                                | 1616   | No  | NA    |       | 0   | 0              | Low-quality     | Genome-fragment | NA   | 2.7   | 0     |
| S12_k141_139898                                | 1616   | No  | NA    |       | 0   | 0              | Low-quality     | Genome-fragment | NA   | 3.62  | 0     |
| S8-final-viral-combined_k141_148461]] [full    | 1616   | No  | NA    |       | 0   | 1              | Low-quality     | Genome-fragment | NA   | 1.33  | 0     |
| S9-final-viral-combined_k141_86168]] [full     | 1617   | No  | NA    |       | 0   | 1              | Not-determined  | Genome-fragment | NA   | 0     | 0     |
| S5-final-viral-combined_k141_170765]] [full    | 3983   | No  | NA    |       | 0   | 1              | Not-determined  | Genome-fragment | NA   | 4.41  | 0     |
| S5-final-viral-combined_k141_108517]] [full    | 4149   | No  | NA    |       | 0   | 2              | Not-determined  | Genome-fragment | NA   | 3.77  | 0     |
| S1-final-viral-combined_k141_22841]] [full     | 1617   | No  | NA    |       | 0   | 0              | Low-quality     | Genome-fragment | NA   | 0     | 0     |
| S1-final-viral-combined_k141_108755]] [full    | 1617   | No  | NA    |       | 1   | 0              | Low-quality     | Genome-fragment | NA   | 3.53  | 0     |
| S5-final-viral-combined_k141_19951]] [full     | 4889   | No  | NA    |       | 0   | 4              | Not-determined  | Genome-fragment | NA   | 79.84 | 30.66 |
| S12-final-viral-combined_k141_288151]] [full   | 1617   | No  | NA    |       | 0   | 0              | Low-quality     | Genome-fragment | NA   | 4.02  | 0     |
| S5-final-viral-combined_k141_179548]] [full    | 2005   | No  | NA    |       | 1   | 2              | Not-determined  | Genome-fragment | NA   | 0.88  | 0     |
| S5-final-viral-combined_k141_206050]] [full    | 57403  | Yes | 39805 | 27    | 13  | Medium-quality | Genome-fragment | NA              | 1.31 | 0     |       |
| S12-final-viral-combined_k141_274684]] [full   | 1617   | No  | NA    |       | 0   | 0              | Low-quality     | Genome-fragment | NA   | 2.7   | 0     |
| S5-final-viral-combined_k141_2043]] [full      | 3569   | No  | NA    |       | 0   | 0              | Not-determined  | Genome-fragment | NA   | 0     | 0     |
| S12-final-viral-combined_k141_81261]] [full    | 1617   | No  | NA    |       | 0   | 1              | Low-quality     | Genome-fragment | NA   | 0.88  | 0     |
| S5-final-viral-combined_k141_197324]] [full    | 1401   | No  | NA    |       | 0   | 0              | Not-determined  | Genome-fragment | NA   | 1.31  | 0     |
| S2-final-viral-combined_k141_106491]] [full    | 1617   | No  | NA    |       | 0   | 0              | Low-quality     | Genome-fragment | NA   | 2.7   | 0     |
| S9-final-viral-combined_k141_19185]] [full     | 1618   | No  | NA    |       | 0   | 0              | Low-quality     | Genome-fragment | NA   | 0     | 0     |
| S5-final-viral-combined_k141_72548]] [full     | 1593   | No  | NA    |       | 0   | 0              | Not-determined  | Genome-fragment | NA   | 0     | 0     |
| S5-final-viral-combined_k141_144041]] [full    | 2093   | No  | NA    |       | 0   | 0              | Not-determined  | Genome-fragment | NA   | 0     | 0     |
| S5-final-viral-combined_k141_20881]] [full     | 1492   | No  | NA    |       | 0   | 2              | Not-determined  | Genome-fragment | NA   | 0     | 0     |
| S5-final-viral-combined_k141_197352]] [full    | 11777  | No  | NA    |       | 0   | 4              | Not-determined  | Genome-fragment | NA   | 2.6   | 0     |
| S11-final-viral-combined_k141_28150]] [full    | 1618   | No  | NA    |       | 0   | 0              | Low-quality     | Genome-fragment | NA   | 2.3   | 0     |
| S1-final-viral-combined_k141_9524]] [full      | 1618   | No  | NA    |       | 0   | 0              | Low-quality     | Genome-fragment | NA   | 29.04 | 0     |
| S1-final-viral-combined_k141_96832]] [full     | 1618   | No  | NA    |       | 1   | 0              | Low-quality     | Genome-fragment | NA   | 0     | 0     |
| S5-final-viral-combined_k141_179714]] [full    | 6431   | No  | NA    |       | 0   | 6              | Not-determined  | Genome-fragment | NA   | 0     | 0     |
| S5-final-viral-combined_k141_170848]] [full    | 2772   | No  | NA    |       | 0   | 1              | Not-determined  | Genome-fragment | NA   | 2.79  | 0     |
| S1-final-viral-combined_k141_98143]] [full     | 1618   | No  | NA    |       | 0   | 2              | Low-quality     | Genome-fragment | NA   | 2.08  | 0     |
| S1_k141_150507                                 | 1618   | No  | NA    |       | 0   | 0              | Low-quality     | Genome-fragment | NA   | 0     | 0     |
| S5-final-viral-combined_k141_125978]] [full    | 1610   | No  | NA    |       | 0   | 1              | Not-determined  | Genome-fragment | NA   | 0     | 0     |
| S5-final-viral-combined_k141_179761]] [full    | 1883   | No  | NA    |       | 0   | 0              | Not-determined  | Genome-fragment | NA   | 0     | 0     |
| S5-final-viral-combined_k141_90603]] [full     | 1876   | No  | NA    |       | 0   | 1              | Not-determined  | Genome-fragment | NA   | 3.63  | 0     |
| S5-final-viral-combined_k141_90605]] [full     | 1505   | No  | NA    |       | 0   | 2              | Not-determined  | Genome-fragment | NA   | 1.28  | 0     |
| S7-final-viral-combined_k141_71324]] [full     | 1618   | No  | NA    |       | 1   | 0              | Low-quality     | Genome-fragment | NA   | 0     | 0     |
| S17-final-viral-combined_k141_61992]] [full    | 1618   | No  | NA    |       | 0   | 2              | Low-quality     | Genome-fragment | NA   | 0     | 0     |
| S5-final-viral-combined_k141_179830]] [full    | 1040   | No  | NA    |       | 0   | 1              | Not-determined  | Genome-fragment | NA   | 0     | 0     |
| S5-final-viral-combined_k141_63592]] [full     | 3319   | No  | NA    |       | 0   | 0              | Not-determined  | Genome-fragment | NA   | 1.12  | 0     |
| S2_k141_43188                                  | 1618   | No  | NA    |       | 0   | 0              | Low-quality     | Genome-fragment | NA   | 0     | 0     |
| S5-final-viral-combined_k141_179846]] [full    | 1111   | No  | NA    |       | 0   | 0              | Not-determined  | Genome-fragment | NA   | 2     | 0     |
| S5-final-viral-combined_k141_117149]] [full    | 2790   | No  | NA    |       | 0   | 0              | Not-determined  | Genome-fragment | NA   | 3.28  | 0     |
| S6-final-viral-combined_k141_124894]] [full    | 1618   | No  | NA    |       | 0   | 1              | Low-quality     | Genome-fragment | NA   | 0     | 0     |
| S6-final-viral-combined_k141_58426]] [full     | 1618   | No  | NA    |       | 1   | 0              | Low-quality     | Genome-fragment | NA   | 0     | 0     |
| S5-final-viral-combined_k141_816500]] [full    | 2144   | No  | NA    |       | 0   | 3              | Not-determined  | Genome-fragment | NA   | 2.25  | 0     |
| S5-final-viral-combined_k141_134947]] [full    | 3215   | No  | NA    |       | 0   | 3              | Not-determined  | Genome-fragment | NA   | 2.16  | 0     |
| S9-final-viral-combined_k141_104815]] [full    | 1619   | No  | NA    |       | 0   | 0              | Low-quality     | Genome-fragment | NA   | 2.49  | 0     |
| S9-final-viral-combined_k141_157578]] [H2gene  | 1619   | No  | NA    |       | 1   | 0              | Low-quality     | Genome-fragment | NA   | 0     | 0     |
| S11-final-viral-combined_k141_327383]] [full   | 1619   | No  | NA    |       | 0   | 1              | Low-quality     | Genome-fragment | NA   | 0     | 0     |
| S1-final-viral-combined_k141_883545]] [full    | 1619   | No  | NA    |       | 0   | 1              | Low-quality     | Genome-fragment | NA   | 0     | 0     |
| S5-final-viral-combined_k141_28074]] [full     | 1751   | No  | NA    |       | 0   | 0              | Not-determined  | Genome-fragment | NA   | 4.12  | 0     |
| S5-final-viral-combined_k14                    |        |     |       |       |     |                |                 |                 |      |       |       |



|                                      |          |       |    |    |    |   |                |                 |       |   |
|--------------------------------------|----------|-------|----|----|----|---|----------------|-----------------|-------|---|
| S11-final-viral-combined_k141_181763 | [full]   | 1622  | No | NA | 0  | 0 | Low-quality    | Genome-fragment | 3.49  | 0 |
| S5-final-viral-combined_k141_181820  | [full]   | 1575  | No | NA | 0  | 0 | Not-determined | Genome-fragment | NA    | 0 |
| S5-final-viral-combined_k141_17141   | [full]   | 4116  | No | NA | 0  | 0 | Not-determined | Genome-fragment | NA    | 0 |
| S5-final-viral-combined_k141_161736  | [full]   | 2555  | No | NA | 0  | 1 | Not-determined | Genome-fragment | NA    | 0 |
| S5-final-viral-combined_k141_13651   | [full]   | 1867  | No | NA | 0  | 3 | Not-determined | Genome-fragment | NA    | 0 |
| S5-final-viral-combined_k141_144416  | [full]   | 1715  | No | NA | 0  | 0 | Not-determined | Genome-fragment | NA    | 0 |
| S1_k141_111634                       |          | 1622  | No | NA | 0  | 2 | Low-quality    | Genome-fragment | 1.06  | 0 |
| S5-final-viral-combined_k141_45379   | [full]   | 1622  | No | NA | 0  | 1 | Low-quality    | Genome-fragment | 3.68  | 0 |
| S5-final-viral-combined_k141_81138   | [full]   | 1622  | No | NA | 0  | 0 | Low-quality    | Genome-fragment | 2.93  | 0 |
| S5-final-viral-combined_k141_161769  | [full]   | 1674  | No | NA | 1  | 2 | Not-determined | Genome-fragment | NA    | 0 |
| S5-final-viral-combined_k141_188639  | [full]   | 1049  | No | NA | 0  | 0 | Not-determined | Genome-fragment | NA    | 0 |
| S5-final-viral-combined_k141_30955   | [full]   | 10461 | No | NA | 0  | 1 | Not-determined | Genome-fragment | NA    | 0 |
| S5_k141_161663                       |          | 1622  | No | NA | 0  | 1 | Low-quality    | Genome-fragment | 0.19  | 0 |
| S5-final-viral-combined_k141_180070  | [full]   | 3241  | No | NA | 0  | 2 | Not-determined | Genome-fragment | NA    | 0 |
| S5-final-viral-combined_k141_188661  | [full]   | 3203  | No | NA | 0  | 0 | Not-determined | Genome-fragment | NA    | 0 |
| S5-final-viral-combined_k141_171306  | [full]   | 2513  | No | NA | 0  | 1 | Not-determined | Genome-fragment | NA    | 0 |
| S5-final-viral-combined_k141_171313  | [full]   | 1704  | No | NA | 0  | 1 | Not-determined | Genome-fragment | NA    | 0 |
| S5-final-viral-combined_k141_73026   | [full]   | 7265  | No | NA | 0  | 2 | Not-determined | Genome-fragment | NA    | 0 |
| S5-final-viral-combined_k141_30960   | [full]   | 2042  | No | NA | 0  | 3 | Not-determined | Genome-fragment | NA    | 0 |
| S7-final-viral-combined_k141_122595  | [H2gene] | 1622  | No | NA | 1  | 0 | Low-quality    | Genome-fragment | 4.7   | 0 |
| S17_k141_264212                      |          | 1622  | No | NA | 0  | 1 | Low-quality    | Genome-fragment | 5.85  | 0 |
| S3-final-viral-combined_k141_27379   | [full]   | 1622  | No | NA | 1  | 0 | Low-quality    | Genome-fragment | 2.68  | 0 |
| S5-final-viral-combined_k141_63708   | [full]   | 3634  | No | NA | 0  | 1 | Not-determined | Genome-fragment | NA    | 0 |
| S5-final-viral-combined_k141_144463  | [full]   | 2444  | No | NA | 0  | 3 | Not-determined | Genome-fragment | NA    | 0 |
| S5-final-viral-combined_k141_180390  | [full]   | 1740  | No | NA | 0  | 2 | Not-determined | Genome-fragment | NA    | 0 |
| S5-final-viral-combined_k141_117521  | [full]   | 6563  | No | NA | 1  | 1 | Not-determined | Genome-fragment | NA    | 0 |
| S2-final-viral-combined_k141_151227  | [full]   | 1622  | No | NA | 0  | 2 | Low-quality    | Genome-fragment | 1.24  | 0 |
| S5-final-viral-combined_k141_206321  | [full]   | 1924  | No | NA | 0  | 0 | Not-determined | Genome-fragment | NA    | 0 |
| S8_k141_4274                         |          | 1622  | No | NA | 0  | 0 | Low-quality    | Genome-fragment | 3.27  | 0 |
| S5-final-viral-combined_k141_73106   | [full]   | 1918  | No | NA | 0  | 0 | Not-determined | Genome-fragment | NA    | 0 |
| S5-final-viral-combined_k141_144516  | [full]   | 3746  | No | NA | 0  | 4 | Not-determined | Genome-fragment | NA    | 0 |
| S9-final-viral-combined_k141_293749  | [full]   | 1623  | No | NA | 0  | 0 | Low-quality    | Genome-fragment | 4.55  | 0 |
| S5-final-viral-combined_k141_180209  | [full]   | 3309  | No | NA | 0  | 3 | Not-determined | Genome-fragment | NA    | 0 |
| S17-final-viral-combined_k141_89000  | [full]   | 1623  | No | NA | 0  | 0 | Low-quality    | Genome-fragment | 2.87  | 0 |
| S5-final-viral-combined_k141_206341  | [full]   | 1693  | No | NA | 0  | 0 | Not-determined | Genome-fragment | NA    | 0 |
| S5-final-viral-combined_k141_206144  | [full]   | 1064  | No | NA | 0  | 1 | Not-determined | Genome-fragment | NA    | 0 |
| S8-final-viral-combined_k141_271826  | [full]   | 1623  | No | NA | 0  | 0 | Low-quality    | Genome-fragment | 3.79  | 0 |
| S5-final-viral-combined_k141_199570  | [full]   | 1576  | No | NA | 0  | 0 | Not-determined | Genome-fragment | NA    | 0 |
| S11-final-viral-combined_k141_274703 | [full]   | 1624  | No | NA | 0  | 0 | Low-quality    | Genome-fragment | 3.39  | 0 |
| S5-final-viral-combined_k141_73158   | [full]   | 1877  | No | NA | 0  | 0 | Not-determined | Genome-fragment | NA    | 0 |
| S1-final-viral-combined_k141_143154  | [full]   | 1624  | No | NA | 0  | 1 | Low-quality    | Genome-fragment | 1.53  | 0 |
| S5-final-viral-combined_k141_144571  | [full]   | 2555  | No | NA | 0  | 2 | Not-determined | Genome-fragment | NA    | 0 |
| S5-final-viral-combined_k141_196018  | [full]   | 1624  | No | NA | 1  | 0 | Low-quality    | Genome-fragment | 1.4   | 0 |
| S17-final-viral-combined_k141_80138  | [full]   | 1624  | No | NA | 0  | 0 | Low-quality    | Genome-fragment | 2.71  | 0 |
| S11-final-viral-combined_k141_194587 | [full]   | 1625  | No | NA | 1  | 0 | Low-quality    | Genome-fragment | 3.36  | 0 |
| S5-final-viral-combined_k141_19623   | [full]   | 2429  | No | NA | 0  | 0 | Not-determined | Genome-fragment | NA    | 0 |
| S11-final-viral-combined_k141_140943 | [H2gene] | 1625  | No | NA | 2  | 0 | Low-quality    | Genome-fragment | 3.34  | 0 |
| S7-final-viral-combined_k141_121856  | [full]   | 1625  | No | NA | 0  | 0 | Low-quality    | Genome-fragment | 1.46  | 0 |
| S7-final-viral-combined_k141_29808   | [full]   | 1625  | No | NA | 0  | 0 | Low-quality    | Genome-fragment | 2.54  | 0 |
| S5-final-viral-combined_k141_12995   | [full]   | 3475  | No | NA | 0  | 2 | Not-determined | Genome-fragment | NA    | 0 |
| S7_k141_233315                       |          | 1625  | No | NA | 0  | 0 | Low-quality    | Genome-fragment | 2.55  | 0 |
| S17-final-viral-combined_k141_59972  | [full]   | 1625  | No | NA | 1  | 0 | Low-quality    | Genome-fragment | 4.25  | 0 |
| S12-final-viral-combined_k141_96695  | [H2gene] | 1625  | No | NA | 1  | 0 | Low-quality    | Genome-fragment | 0.63  | 0 |
| S5-final-viral-combined_k141_197729  | [full]   | 1390  | No | NA | 0  | 1 | Not-determined | Genome-fragment | NA    | 0 |
| S5-final-viral-combined_k141_552741  | [full]   | 1629  | No | NA | 0  | 0 | Not-determined | Genome-fragment | NA    | 0 |
| S5-final-viral-combined_k141_171536  | [full]   | 1589  | No | NA | 0  | 2 | Not-determined | Genome-fragment | NA    | 0 |
| S5-final-viral-combined_k141_82013   | [full]   | 2175  | No | NA | 0  | 2 | Not-determined | Genome-fragment | NA    | 0 |
| S5-final-viral-combined_k141_144628  | [full]   | 2597  | No | NA | 0  | 0 | Not-determined | Genome-fragment | NA    | 0 |
| S2-final-viral-combined_k141_207526  | [full]   | 1625  | No | NA | 0  | 1 | Low-quality    | Genome-fragment | 1.86  | 0 |
| S4_k141_5855                         |          | 1625  | No | NA | 0  | 0 | Low-quality    | Genome-fragment | 1.65  | 0 |
| S8-final-viral-combined_k141_102160  | [full]   | 1625  | No | NA | 2  | 0 | Low-quality    | Genome-fragment | 2.36  | 0 |
| S11-final-viral-combined_k141_25467  | [full]   | 1626  | No | NA | 0  | 0 | Low-quality    | Genome-fragment | 3.09  | 0 |
| S5-final-viral-combined_k141_82052   | [full]   | 1174  | No | NA | 1  | 3 | Not-determined | Genome-fragment | NA    | 0 |
| S5-final-viral-combined_k141_188884  | [full]   | 4012  | No | NA | 0  | 0 | Not-determined | Genome-fragment | NA    | 0 |
| S11-final-viral-combined_k141_76749  | [full]   | 1626  | No | NA | 0  | 0 | Low-quality    | Genome-fragment | 0.98  | 0 |
| S5-final-viral-combined_k141_117510  | [full]   | 3209  | No | NA | 0  | 0 | Not-determined | Genome-fragment | NA    | 0 |
| S1-final-viral-combined_k141_279822  | [full]   | 1626  | No | NA | 0  | 0 | Low-quality    | Genome-fragment | 2.77  | 0 |
| S12-final-viral-combined_k141_34519  | [full]   | 1626  | No | NA | 0  | 1 | Low-quality    | Genome-fragment | 1.59  | 0 |
| S5-final-viral-combined_k141_73301   | [full]   | 20824 | No | NA | 11 | 0 | Medium-quality | Genome-fragment | 55.48 | 0 |
| S5-final-viral-combined_k141_71637   | [full]   | 1168  | No | NA | 0  | 1 | Not-determined | Genome-fragment | NA    | 0 |
| S5-final-viral-combined_k141_28323   | [full]   | 3195  | No | NA | 0  | 4 | Not-determined | Genome-fragment | NA    | 0 |
| S5-final-viral-combined_k141_28331   | [full]   | 1346  | No | NA | 0  | 1 | Not-determined | Genome-fragment | NA    | 0 |
| S5-final-viral-combined_k141_63921   | [full]   | 4082  | No | NA | 0  | 0 | Not-determined | Genome-fragment | NA    | 0 |
| S12-final-viral-combined_k141_2315   | [full]   | 1626  | No | NA | 1  | 0 | Low-quality    | Genome-fragment | 2.89  | 0 |
| S5-final-viral-combined_k141_2661    | [full]   | 1203  | No | NA | 0  | 1 | Not-determined | Genome-fragment | NA    | 0 |
| S2-final-viral-combined_k141_179404  | [full]   | 1626  | No | NA | 0  | 0 | Low-quality    | Genome-fragment | 3.71  | 0 |
| S6-final-viral-combined_k141_60287   | [full]   | 1626  | No | NA | 0  | 0 | Low-quality    | Genome-fragment | 2.29  | 0 |
| S6_k141_39834                        |          | 1626  | No | NA | 0  | 0 | Low-quality    | Genome-fragment | 3.02  | 0 |
| S8-final-viral-combined_k141_72285   | [full]   | 1626  | No | NA | 0  | 0 | Low-quality    | Genome-fragment | 2.29  | 0 |
| S11-final-viral-combined_k141_58015  | [H2gene] | 1627  | No | NA | 1  | 0 | Low-quality    | Genome-fragment | 1.06  | 0 |
| S1-final-viral-combined_k141_186661  | [full]   | 1627  | No | NA | 0  | 0 | Low-quality    | Genome-fragment | 4.39  | 0 |
| S5-final-viral-combined_k141_116137  | [full]   | 1627  | No | NA | 0  | 0 | Low-quality    | Genome-fragment | 3.67  | 0 |
| S5-final-viral-combined_k141_135373  | [full]   | 1869  | No | NA | 1  | 0 | Not-determined | Genome-fragment | NA    | 0 |
| S5-final-viral-combined_k141_114393  | [H2gene] | 1627  | No | NA | 2  | 0 | Low-quality    | Genome-fragment | 3.56  | 0 |
| S5-final-viral-combined_k141_197876  | [full]   | 1926  | No | NA | 0  | 0 | Not-determined | Genome-fragment | NA    | 0 |
| S5-final-viral-combined_k141_46470   | [full]   | 3922  | No | NA | 0  | 1 | Not-determined | Genome-fragment | NA    | 0 |
| S7-final-viral-combined_k141_236380  | [full]   | 1627  | No | NA | 2  | 0 | Low-quality    | Genome-fragment | 3.32  | 0 |
| S5-final-viral-combined_k141_81194   | [full]   | 1537  | No | NA | 0  | 0 | Not-determined | Genome-fragment | NA    | 0 |
| S12-final-viral-combined_k141_225312 | [full]   | 1627  | No | NA | 0  | 0 | Low-quality    | Genome-fragment | 1.43  | 0 |
| S2-final-viral-combined_k141_14783   | [full]   | 1627  | No | NA | 1  | 0 | Low-quality    | Genome-fragment | 1.87  | 0 |
| S4_k141_144569                       |          | 1627  | No | NA | 0  | 1 | Low-quality    | Genome-fragment | 0.32  | 0 |
| S5-final-viral-combined_k141_84321   | [full]   | 1628  | No | NA | 0  | 1 | Low-quality    | Genome-fragment | 0.78  | 0 |
| S11-final-viral-combined_k141_196688 | [full]   | 1628  | No | NA | 0  | 1 | Low-quality    | Genome-fragment | 2.42  | 0 |
| S5-final-viral-combined_k141_135439  | [full]   | 1598  | No | NA | 0  | 0 | Not-determined | Genome-fragment | NA    | 0 |
| S5-final-viral-combined_k141_28378   | [full]   | 3246  | No | NA | 0  | 2 | Not-determined | Genome-fragment | NA    | 0 |
| S5-final-viral-combined_k141_5357    | [full]   | 3513  | No | NA | 0  | 3 | Not-determined | Genome-fragment | NA    | 0 |
| S5-final-viral-combined_k141_99803   | [full]   | 4702  | No | NA | 0  | 2 | Not-determined | Genome-fragment | NA    | 0 |
| S1-final-viral-combined_k141_286412  | [full]   | 1628  | No | NA | 0  | 0 | Low-quality    | Genome-fragment | 3.81  | 0 |
| S5-final-viral-combined_k141_99804   | [full]   | 2300  | No | NA | 0  | 0 | Not-determined | Genome-fragment | NA    | 0 |
| S1_k141_165897                       |          | 1628  | No | NA | 1  | 0 | Low-quality    | Genome-fragment | 2.63  | 0 |
| S5-final-viral-combined_k141_153406  | [full]   | 6829  | No | NA | 0  | 1 | Not-determined | Genome-fragment | NA    | 0 |
| S5-final-viral-combined_k141_144751  | [full]   | 1464  | No | NA | 0  | 0 | Not-determined | Genome-fragment | NA    | 0 |
| S5-final-viral-combined_k141_127882  | [full]   | 1628  | No | NA | 0  | 0 | Low-quality    | Genome-fragment | 3.78  | 0 |
| S5-final-viral-combined_k141_2761    | [full]   | 6397  | No | NA | 0  | 0 | Not-determined | Genome-fragment | NA    | 0 |
| S5-final-viral-combined_k141_19527   | [full]   | 3094  | No | NA | 0  | 1 | Not-determined | Genome-fragment | NA    | 0 |
| S5-final-viral-combined_k141_144773  | [full]   | 1103  | No | NA | 0  | 1 | Not-determined | Genome-fragment | NA    | 0 |
| S5-final-viral-combined_k141_14049   | [full]   | 1835  | No | NA | 0  | 1 | Not-determined | Genome-fragment | NA    | 0 |
| S17-final-viral-combined_k141_7167   | [full]   | 1628  | No | NA | 0  | 0 | Low-quality    | Genome-fragment | 3.4   | 0 |
| S5-final-viral-combined_k141_135371  | [full]   | 1628  | No | NA | 0  | 0 | Low-quality    | Genome-fragment | NA    | 0 |
| S17-final-viral-combined_k141_30720  | [full]   | 1628  | No | NA | 0  | 0 | Low-quality    | Genome-fragment | 4.06  | 0 |
| S17-final-viral-combined_k141_96378  | [full]   | 1628  | No | NA | 0  | 0 | Low-quality    | Genome-fragment | 3.83  | 0 |
| S5-final-viral-combined_k141_175416  | [full]   | 4663  | No | NA | 0  | 0 | Not-determined | Genome-fragment | NA    | 0 |
| S5-final-viral-combined_k141_126710  | [full]   | 1266  | No | NA | 0  | 1 | Not-determined | Genome-fragment | NA    | 0 |
| S2_k141_71910                        |          | 1628  | No | NA | 0  | 1 | Low-quality    | Genome-fragment | 0.51  | 0 |
| S5-final-viral-combined_k141_126721  | [full]   | 4100  | No | NA | 0  | 0 | Not-determined | Genome-fragment | NA    | 0 |
| S8-final-viral-combined_k141_98500   | [full]   | 1628  | No | NA | 1  | 0 | Low-quality    | Genome-fragment | 3.2   | 0 |
| S9-final-viral-combined_k141_67934   | [full]   | 1629  | No | NA | 3  | 0 | Low-quality    | Genome-fragment | 3.7   | 0 |
| S11-final-viral-combined_k141_279682 | [full]   | 1629  | No | NA | 1  | 0 | Low-quality    | Genome-fragment | 4.48  | 0 |
| S5-final-viral-combined_k141_189106  | [full]   | 6710  | No | NA | 0  | 1 | Not-determined | Genome-fragment | NA    | 0 |
| S1-final-viral-combined_k141_206546  | [full]   | 1983  | No | NA | 0  | 0 | Not-determined | Genome-fragment | NA    | 0 |
| S11_k141_189941                      |          | 1629  | No | NA | 0  | 2 | Low-quality    | Genome-fragment | 5.43  | 0 |
| S5-final-viral-combined_k141_66687   | [full]   | 1314  | No | NA | 0  | 0 | Not-determined | Genome-fragment | NA    | 0 |
| S1-final-viral-combined_k141_238876  | [full]   | 1629  | No | NA | 0  | 2 | Low-quality    | Genome-fragment | 1.87  | 0 |
| S5-final-viral-combined_k141_206564  | [full]   | 5393  | No | NA | 0  | 1 | Not-determined | Genome-fragment | NA    | 0 |
| S3_k141_78502                        |          | 1629  | No | NA | 1  | 0 | Low-quality    | Genome-fragment | 0.75  | 0 |
| S5_k141_165622                       |          | 1629  | No | NA | 0  | 1 | Low-quality    | Genome-fragment | 0.4   | 0 |
| S5-final-viral-combined_k141_2872    | [full]   | 2039  | No | NA | 0  | 1 | Not-determined | Genome-fragment | NA    | 0 |
| S5-final-viral-combined_k141_175753  | [full]   | 1700  | No | NA | 0  | 0 | Not-determined | Genome-fragment | NA    | 0 |
| S5-final-viral-combined_k141_189161  | [full]   | 1095  | No | NA | 0  | 0 | Not-determined | Genome-fragment | NA    | 0 |
| S5-final-viral-combined_k141_126779  | [full]   | 1470  | No | NA | 0  | 0 | Not-determined | Genome-fragment | NA    | 0 |
| S7-final-viral-combined_k141_44231   |          |       |    |    |    |   |                |                 |       |   |



|                                      |          |       |     |    |    |    |                |                 |       |       |
|--------------------------------------|----------|-------|-----|----|----|----|----------------|-----------------|-------|-------|
| S5-final-viral-combined_k141_522911  | [full]   | 1631  | No  | NA | 0  | 2  | Low-quality    | Genome-fragment | 3.49  | 0     |
| S5-final-viral-combined_k141_17641   | [full]   | 1631  | No  | NA | 1  | 0  | Low-quality    | Genome-fragment | 2.47  | 0     |
| S7-final-viral-combined_k141_86557   | [full]   | 1631  | No  | NA | 0  | 0  | Low-quality    | Genome-fragment | 3.1   | 0     |
| S17-k141_106562                      |          | 1631  | No  | NA | 0  | 0  | Low-quality    | Genome-fragment | 2.28  | 0     |
| S5-final-viral-combined_k141_100184  | [full]   | 2214  | No  | NA | 0  | 2  | Not-determined | Genome-fragment | NA    | 0     |
| S12_k141_191167                      |          | 1631  | No  | NA | 0  | 0  | Low-quality    | Genome-fragment | 2.72  | 0     |
| S5-final-viral-combined_k141_28721   | [full]   | 1684  | No  | NA | 0  | 2  | Not-determined | Genome-fragment | NA    | 0     |
| S5-final-viral-combined_k141_189348  | [full]   | 1490  | No  | NA | 0  | 2  | Not-determined | Genome-fragment | NA    | 0     |
| S4-final-viral-combined_k141_117655  | [full]   | 1631  | No  | NA | 0  | 1  | Low-quality    | Genome-fragment | 3.43  | 0     |
| S5-final-viral-combined_k141_189375  | [full]   | 2546  | No  | NA | 0  | 1  | Not-determined | Genome-fragment | NA    | 0     |
| S8-final-viral-combined_k141_30067   | [full]   | 1631  | No  | NA | 0  | 0  | Low-quality    | Genome-fragment | 1.3   | 0     |
| S9-final-viral-combined_k141_27026   | [full]   | 1632  | No  | NA | 0  | 0  | Low-quality    | Genome-fragment | 3.23  | 0     |
| S5-final-viral-combined_k141_100267  | [full]   | 1859  | No  | NA | 0  | 0  | Not-determined | Genome-fragment | NA    | 0     |
| S3-final-viral-combined_k141_31489   | [full]   | 1632  | No  | NA | 0  | 1  | Low-quality    | Genome-fragment | 1.29  | 0     |
| S5-final-viral-combined_k141_91527   | [full]   | 1679  | No  | NA | 0  | 0  | Not-determined | Genome-fragment | NA    | 0     |
| S5-final-viral-combined_k141_30021   | [full]   | 3578  | No  | NA | 0  | 0  | Not-determined | Genome-fragment | NA    | 0     |
| S5-final-viral-combined_k141_144947  | [full]   | 1632  | No  | NA | 0  | 1  | Low-quality    | Genome-fragment | 1.46  | 0     |
| S12_k141_209374                      |          | 1632  | No  | NA | 0  | 0  | Low-quality    | Genome-fragment | 1.93  | 0     |
| S2-final-viral-combined_k141_68836   | [full]   | 1632  | No  | NA | 1  | 1  | Low-quality    | Genome-fragment | 0.72  | 0     |
| S5-final-viral-combined_k141_73603   | [full]   | 2492  | No  | NA | 0  | 3  | Not-determined | Genome-fragment | NA    | 0     |
| S4-final-viral-combined_k141_113778  | [full]   | 1632  | No  | NA | 2  | 0  | Low-quality    | Genome-fragment | 1.96  | 0     |
| S8-final-viral-combined_k141_27890   | [full]   | 1632  | No  | NA | 0  | 0  | Low-quality    | Genome-fragment | 2.84  | 0     |
| S8-final-viral-combined_k141_248616  | [full]   | 1632  | No  | NA | 0  | 0  | Low-quality    | Genome-fragment | 1.07  | 0     |
| S5-final-viral-combined_k141_3074    | [full]   | 2986  | No  | NA | 0  | 5  | Not-determined | Genome-fragment | NA    | 0     |
| S5-final-viral-combined_k141_135705  | [full]   | 1035  | No  | NA | 0  | 0  | Not-determined | Genome-fragment | NA    | 0     |
| S5-final-viral-combined_k141_172035  | [full]   | 1773  | No  | NA | 0  | 1  | Not-determined | Genome-fragment | NA    | 0     |
| S9-final-viral-combined_k141_121585  | [full]   | 1633  | No  | NA | 0  | 0  | Low-quality    | Genome-fragment | 0.6   | 0     |
| S9-final-viral-combined_k141_90790   | [full]   | 1633  | No  | NA | 0  | 0  | Low-quality    | Genome-fragment | 2.94  | 0     |
| S5-final-viral-combined_k141_28795   | [full]   | 1013  | No  | NA | 0  | 0  | Not-determined | Genome-fragment | NA    | 0     |
| S11-final-viral-combined_k141_199450 | [full]   | 1633  | No  | NA | 0  | 0  | Low-quality    | Genome-fragment | 1.23  | 0     |
| S1-final-viral-combined_k141_292442  | [full]   | 1633  | No  | NA | 1  | 0  | Low-quality    | Genome-fragment | 3.09  | 0     |
| S5-final-viral-combined_k141_100404  | [full]   | 1264  | No  | NA | 0  | 1  | Not-determined | Genome-fragment | NA    | 0     |
| S1-final-viral-combined_k141_131267  | [full]   | 1633  | No  | NA | 0  | 0  | Low-quality    | Genome-fragment | 3.31  | 0     |
| S5-final-viral-combined_k141_100436  | [full]   | 1678  | No  | NA | 0  | 0  | Not-determined | Genome-fragment | NA    | 0     |
| S1_k141_39107                        |          | 1633  | No  | NA | 1  | 0  | Low-quality    | Genome-fragment | 4.97  | 0     |
| S7-final-viral-combined_k141_125230  | [full]   | 1633  | No  | NA | 2  | 0  | Low-quality    | Genome-fragment | 2.32  | 0     |
| S5-final-viral-combined_k141_145067  | [full]   | 31451 | No  | NA | 13 | 2  | Medium-quality | Genome-fragment | 79.99 | 0     |
| S5-final-viral-combined_k141_198248  | [full]   | 3572  | No  | NA | 0  | 1  | Medium-quality | Genome-fragment | NA    | 0     |
| S17-k141_225133                      |          | 1633  | No  | NA | 0  | 1  | Low-quality    | Genome-fragment | 2.83  | 0     |
| S5-final-viral-combined_k141_73701   | [full]   | 1822  | No  | NA | 0  | 0  | Not-determined | Genome-fragment | NA    | 0     |
| S5-final-viral-combined_k141_198278  | [full]   | 4397  | No  | NA | 0  | 2  | Not-determined | Genome-fragment | NA    | 0     |
| S5-final-viral-combined_k141_127317  | [full]   | 4640  | No  | NA | 0  | 4  | Not-determined | Genome-fragment | NA    | 0     |
| S5-final-viral-combined_k141_91581   | [full]   | 1521  | No  | NA | 0  | 0  | Not-determined | Genome-fragment | NA    | 0     |
| S5-final-viral-combined_k141_64496   | [full]   | 3162  | No  | NA | 0  | 0  | Not-determined | Genome-fragment | NA    | 0     |
| S5-final-viral-combined_k141_135776  | [full]   | 1604  | No  | NA | 0  | 1  | Not-determined | Genome-fragment | NA    | 0     |
| S2-final-viral-combined_k141_48305   | [full]   | 1633  | No  | NA | 0  | 0  | Low-quality    | Genome-fragment | 2.13  | 0     |
| S8_k141_136281                       |          | 1633  | No  | NA | 0  | 0  | Low-quality    | Genome-fragment | 3.58  | 0     |
| S9_k141_29475                        |          | 1634  | No  | NA | 0  | 1  | Low-quality    | Genome-fragment | 1.22  | 0     |
| S5-final-viral-combined_k141_198339  | [full]   | 3127  | No  | NA | 0  | 2  | Not-determined | Genome-fragment | NA    | 0     |
| S5-final-viral-combined_k141_109757  | [H2gene] | 1634  | No  | NA | 2  | 0  | Low-quality    | Genome-fragment | 3.65  | 0     |
| S5-final-viral-combined_k141_91609   | [full]   | 1219  | No  | NA | 0  | 1  | Not-determined | Genome-fragment | NA    | 0     |
| S17-final-viral-combined_k141_15887  | [full]   | 1634  | No  | NA | 0  | 0  | Low-quality    | Genome-fragment | 2.52  | 0     |
| S2-final-viral-combined_k141_38612   | [full]   | 1634  | No  | NA | 2  | 0  | Low-quality    | Genome-fragment | 3.88  | 0     |
| S8-final-viral-combined_k141_14364   | [full]   | 1634  | No  | NA | 0  | 1  | Low-quality    | Genome-fragment | 2.91  | 0     |
| S5-final-viral-combined_k141_117921  | [full]   | 2244  | No  | NA | 0  | 2  | Not-determined | Genome-fragment | NA    | 0     |
| S5-final-viral-combined_k141_117945  | [full]   | 1889  | No  | NA | 0  | 1  | Not-determined | Genome-fragment | NA    | 0     |
| S5-final-viral-combined_k141_108949  | [full]   | 2820  | No  | NA | 0  | 2  | Not-determined | Genome-fragment | NA    | 0     |
| S5-final-viral-combined_k141_145114  | [full]   | 4397  | No  | NA | 0  | 1  | Not-determined | Genome-fragment | NA    | 0     |
| S11-final-viral-combined_k141_312060 | [H2gene] | 1635  | No  | NA | 1  | 0  | Low-quality    | Genome-fragment | 4.07  | 0     |
| S5_k141_2350                         |          | 1635  | No  | NA | 0  | 0  | Low-quality    | Genome-fragment | 2.94  | 0     |
| S5-final-viral-combined_k141_162499  | [full]   | 1218  | No  | NA | 0  | 1  | Not-determined | Genome-fragment | NA    | 0     |
| S7-final-viral-combined_k141_187427  | [H2gene] | 1635  | No  | NA | 0  | 0  | Low-quality    | Genome-fragment | 4.05  | 0     |
| S5-final-viral-combined_k141_117991  | [full]   | 4854  | No  | NA | 0  | 2  | Not-determined | Genome-fragment | NA    | 0     |
| S7-final-viral-combined_k141_88751   | [H2gene] | 1635  | No  | NA | 2  | 0  | Low-quality    | Genome-fragment | 3.66  | 0     |
| S5-final-viral-combined_k141_118057  | [full]   | 3080  | No  | NA | 0  | 2  | Not-determined | Genome-fragment | NA    | 0     |
| S17-final-viral-combined_k141_13312  | [full]   | 1635  | No  | NA | 0  | 0  | Low-quality    | Genome-fragment | 3.89  | 0     |
| S5-final-viral-combined_k141_162580  | [full]   | 1631  | No  | NA | 0  | 11 | Not-determined | Genome-fragment | NA    | 0     |
| S5-final-viral-combined_k141_19708   | [full]   | 2792  | No  | NA | 0  | 1  | Not-determined | Genome-fragment | NA    | 0     |
| S5-final-viral-combined_k141_64625   | [full]   | 1583  | No  | NA | 0  | 14 | Not-determined | Genome-fragment | NA    | 0     |
| S12-final-viral-combined_k141_228564 | [H2gene] | 1635  | No  | NA | 2  | 0  | Low-quality    | Genome-fragment | 5.21  | 0     |
| S8_k141_177747                       |          | 1635  | No  | NA | 0  | 1  | Low-quality    | Genome-fragment | 1.9   | 0     |
| S9-final-viral-combined_k141_25760   | [full]   | 1636  | No  | NA | 2  | 0  | Low-quality    | Genome-fragment | 4.14  | 0     |
| S5-final-viral-combined_k141_28977   | [full]   | 5040  | No  | NA | 0  | 4  | Not-determined | Genome-fragment | NA    | 0     |
| S11-final-viral-combined_k141_253857 | [full]   | 1636  | No  | NA | 0  | 0  | Low-quality    | Genome-fragment | 3.58  | 0     |
| S5-final-viral-combined_k141_27347   | [full]   | 3184  | No  | NA | 0  | 1  | Not-determined | Genome-fragment | NA    | 0     |
| S5-final-viral-combined_k141_145160  | [full]   | 5054  | No  | NA | 0  | 0  | Not-determined | Genome-fragment | NA    | 0     |
| S5-final-viral-combined_k141_189742  | [full]   | 1685  | No  | NA | 0  | 2  | Not-determined | Genome-fragment | NA    | 0     |
| S5-final-viral-combined_k141_162620  | [full]   | 4130  | No  | NA | 0  | 0  | Not-determined | Genome-fragment | NA    | 0     |
| S5-final-viral-combined_k141_135895  | [full]   | 1048  | No  | NA | 0  | 0  | Not-determined | Genome-fragment | NA    | 0     |
| S5-final-viral-combined_k141_135897  | [full]   | 1839  | No  | NA | 0  | 2  | Not-determined | Genome-fragment | NA    | 0     |
| S1-final-viral-combined_k141_180976  | [full]   | 1636  | No  | NA | 1  | 0  | Low-quality    | Genome-fragment | 2.6   | 0     |
| S5-final-viral-combined_k141_27533   | [H2gene] | 10738 | No  | NA | 0  | 3  | Not-determined | Genome-fragment | NA    | 0     |
| S5-final-viral-combined_k141_19732   | [full]   | 10738 | No  | NA | 0  | 1  | Not-determined | Genome-fragment | NA    | 0     |
| S5-final-viral-combined_k141_180976  | [full]   | 1734  | No  | NA | 0  | 1  | Not-determined | Genome-fragment | NA    | 0     |
| S5-final-viral-combined_k141_18975   | [full]   | 3131  | No  | NA | 0  | 1  | Not-determined | Genome-fragment | NA    | 0     |
| S5-final-viral-combined_k141_18098   | [full]   | 3244  | No  | NA | 0  | 2  | Not-determined | Genome-fragment | NA    | 0     |
| S5-final-viral-combined_k141_64525   | [full]   | 1636  | No  | NA | 0  | 0  | Low-quality    | Genome-fragment | 2.04  | 0     |
| S5-final-viral-combined_k141_100722  | [full]   | 1232  | No  | NA | 0  | 1  | Not-determined | Genome-fragment | NA    | 0     |
| S5-final-viral-combined_k141_138903  | [full]   | 1636  | No  | NA | 0  | 0  | Low-quality    | Genome-fragment | 1.15  | 0     |
| S17-final-viral-combined_k141_155365 | [full]   | 1636  | No  | NA | 0  | 0  | Low-quality    | Genome-fragment | 0.96  | 0     |
| S8-final-viral-combined_k141_102708  | [full]   | 1636  | No  | NA | 1  | 0  | Low-quality    | Genome-fragment | 2.74  | 0     |
| S9-final-viral-combined_k141_114935  | [H2gene] | 1637  | No  | NA | 2  | 0  | Low-quality    | Genome-fragment | 4.3   | 0     |
| S5-final-viral-combined_k141_91715   | [full]   | 2977  | No  | NA | 0  | 0  | Not-determined | Genome-fragment | NA    | 0     |
| S5-final-viral-combined_k141_3201    | [full]   | 33282 | No  | NA | 32 | 0  | Medium-quality | Genome-fragment | 85.21 | 0     |
| S5-final-viral-combined_k141_198400  | [full]   | 1399  | No  | NA | 0  | 1  | Not-determined | Genome-fragment | NA    | 0     |
| S11-final-viral-combined_k141_12170  | [full]   | 1637  | No  | NA | 0  | 0  | Low-quality    | Genome-fragment | 4.32  | 0     |
| S1-final-viral-combined_k141_185944  | [full]   | 1637  | No  | NA | 3  | 0  | Low-quality    | Genome-fragment | 4.2   | 0     |
| S5-final-viral-combined_k141_181009  | [full]   | 1950  | No  | NA | 0  | 1  | Not-determined | Genome-fragment | NA    | 0     |
| S5-final-viral-combined_k141_91739   | [full]   | 3107  | No  | NA | 0  | 2  | Not-determined | Genome-fragment | NA    | 0     |
| S1-final-viral-combined_k141_136845  | [H2gene] | 1637  | No  | NA | 0  | 0  | Low-quality    | Genome-fragment | 0.9   | 0     |
| S5-final-viral-combined_k141_91742   | [full]   | 1589  | No  | NA | 0  | 1  | Not-determined | Genome-fragment | NA    | 0     |
| S1-final-viral-combined_k141_70010   | [H2gene] | 1637  | No  | NA | 2  | 0  | Low-quality    | Genome-fragment | 4.18  | 0     |
| S5-final-viral-combined_k141_112715  | [full]   | 2896  | No  | NA | 0  | 1  | Not-determined | Genome-fragment | NA    | 0     |
| S5-final-viral-combined_k141_181026  | [full]   | 3497  | No  | NA | 0  | 2  | Not-determined | Genome-fragment | NA    | 0     |
| S7_k141_171009                       |          | 1637  | No  | NA | 0  | 0  | Low-quality    | Genome-fragment | 2.97  | 0     |
| S5-final-viral-combined_k141_55675   | [full]   | 3891  | No  | NA | 0  | 1  | Not-determined | Genome-fragment | NA    | 0     |
| S4-final-viral-combined_k141_140440  | [full]   | 1637  | No  | NA | 0  | 3  | Low-quality    | Genome-fragment | 1.99  | 0     |
| S5-final-viral-combined_k141_91807   | [full]   | 3386  | No  | NA | 0  | 2  | Not-determined | Genome-fragment | NA    | 0     |
| S5-final-viral-combined_k141_135993  | [full]   | 2087  | No  | NA | 0  | 1  | Not-determined | Genome-fragment | NA    | 0     |
| S5-final-viral-combined_k141_153827  | [full]   | 3331  | No  | NA | 0  | 2  | Not-determined | Genome-fragment | NA    | 0     |
| S5-final-viral-combined_k141_37952   | [full]   | 1575  | No  | NA | 0  | 0  | Not-determined | Genome-fragment | NA    | 0     |
| S11-final-viral-combined_k141_104162 | [full]   | 1638  | No  | NA | 1  | 0  | Low-quality    | Genome-fragment | 3.54  | 0     |
| S11-final-viral-combined_k141_209667 | [H2gene] | 1638  | No  | NA | 1  | 0  | Low-quality    | Genome-fragment | 3.43  | 0     |
| S5-final-viral-combined_k141_127423  | [full]   | 3245  | No  | NA | 0  | 2  | Not-determined | Genome-fragment | NA    | 0     |
| S7-final-viral-combined_k141_65429   | [full]   | 1638  | No  | NA | 0  | 1  | Low-quality    | Genome-fragment | 2.72  | 0     |
| S7-final-viral-combined_k141_180248  | [full]   | 1638  | No  | NA | 0  | 0  | Low-quality    | Genome-fragment | 4.96  | 0     |
| S17-final-viral-combined_k141_196248 | [full]   | 1638  | No  | NA | 0  | 0  | Low-quality    | Genome-fragment | 3.03  | 0     |
| S2-final-viral-combined_k141_228022  | [full]   | 1638  | No  | NA | 0  | 0  | Low-quality    | Genome-fragment | 3.73  | 0     |
| S5-final-viral-combined_k141_18107   | [full]   | 57653 | Yes | NA | 4  | 9  | Medium-quality | Genome-fragment | 52.91 | 57.84 |
| S5-final-viral-combined_k141_172483  | [full]   | 1017  | No  | NA | 0  | 1  | Not-determined | Genome-fragment | NA    | 0     |
| S5-final-viral-combined_k141_47405   | [full]   | 1016  | No  | NA | 0  | 1  | Not-determined | Genome-fragment | NA    | 0     |
| S5-final-viral-combined_k141_3392    | [full]   | 3215  | No  | NA | 0  | 2  | Not-determined | Genome-fragment | NA    | 0     |
| S5-final-viral-combined_k141_136148  | [full]   | 1563  | No  | NA | 0  | 1  | Not-determined | Genome-fragment | NA    | 0     |
| S5-final-viral-combined_k141_73909   | [full]   | 2495  | No  | NA | 0  | 0  | Not-determined | Genome-fragment | NA    | 0     |
| S5-final-viral-combined_k141_19935   | [full]   | 1147  | No  | NA | 0  | 0  | Not-determined | Genome-fragment | NA    | 0     |
| S2_k141_124630                       |          | 1638  | No  | NA | 1  | 0  | Low-quality    | Genome-fragment | 5.55  | 0     |
| S9-final-viral-combined_k141_23461   | [full]   | 1639  | No  | NA | 0  | 1  | Low-quality    | Genome-fragment | 2.12  | 0     |
| S5-final-viral-combined_k141_3443    | [full]   | 1492  | No  | NA | 0  | 0  | Not-determined | Genome-fragment | NA    | 0     |
| S5-final-viral-combined_k141_189934  | [full]   | 2938  | No  | NA | 0  | 0  | Not-determined | Genome-fragment | NA    | 0     |
| S11-final-viral-combined_k141_65883  | [full]   | 1639  | No  | NA | 1  | 0  | Low-quality    | Genome-fragment |       |       |



|                                      |          |        |     |    |       |    |                |                 |                 |       |
|--------------------------------------|----------|--------|-----|----|-------|----|----------------|-----------------|-----------------|-------|
| S5-final-viral-combined_k141_172754  | [full]   | 5888   | No  | NA | 0     | 1  | Not-determined | Genome-fragment | NA              | 0     |
| S5-final-viral-combined_k141_172251  | [H2gene] | 1641   | No  | NA | 0     | 0  | Low-quality    | Genome-fragment | NA              | 2.14  |
| S5-final-viral-combined_k141_182611  | [full]   | 2203   | No  | NA | 0     | 0  | Not-determined | Genome-fragment | NA              | 0     |
| S5-final-viral-combined_k141_163011  | [full]   | 1039   | No  | NA | 0     | 0  | Not-determined | Genome-fragment | NA              | 0     |
| S5-final-viral-combined_k141_16661   | [full]   | 3730   | No  | NA | 0     | 1  | Not-determined | Genome-fragment | NA              | 0     |
| S17-final-viral-combined_k141_194691 | [H2gene] | 1641   | No  | NA | 1     | 0  | Low-quality    | Genome-fragment | NA              | 4.58  |
| S5-final-viral-combined_k141_190116  | [full]   | 2561   | No  | NA | 0     | 1  | Not-determined | Genome-fragment | NA              | 0     |
| S5-final-viral-combined_k141_207544  | [full]   | 1312   | No  | NA | 0     | 0  | Not-determined | Genome-fragment | NA              | 0     |
| S5-final-viral-combined_k141_207451  | [full]   | 3111   | No  | NA | 0     | 1  | Not-determined | Genome-fragment | NA              | 0     |
| S5-final-viral-combined_k141_47798   | [full]   | 2588   | No  | NA | 0     | 1  | Not-determined | Genome-fragment | NA              | 0     |
| S5-final-viral-combined_k141_181265  | [full]   | 169798 | No  | NA | 0     | 38 | Not-determined | Genome-fragment | NA              | 0     |
| S12-final-viral-combined_k141_35621  | [full]   | 1641   | No  | NA | 0     | 0  | Low-quality    | Genome-fragment | NA              | 2.62  |
| S12-final-viral-combined_k141_240005 | [full]   | 1641   | No  | NA | 0     | 1  | Low-quality    | Genome-fragment | NA              | 0.99  |
| S4-final-viral-combined_k141_420551  | [full]   | 1641   | No  | NA | 0     | 0  | Low-quality    | Genome-fragment | NA              | 3.47  |
| S5-final-viral-combined_k141_109231  | [full]   | 5702   | No  | NA | 0     | 1  | Not-determined | Genome-fragment | NA              | 0     |
| S8-final-viral-combined_k141_167500  | [full]   | 1641   | No  | NA | 1     | 0  | Low-quality    | Genome-fragment | NA              | 2.75  |
| S5-final-viral-combined_k141_181300  | [full]   | 1176   | No  | NA | 0     | 1  | Not-determined | Genome-fragment | NA              | 0     |
| S5-final-viral-combined_k141_47841   | [full]   | 1368   | No  | NA | 0     | 0  | Not-determined | Genome-fragment | NA              | 0     |
| S5-final-viral-combined_k141_190194  | [full]   | 1641   | No  | NA | 0     | 1  | Not-determined | Genome-fragment | NA              | 0     |
| S5-final-viral-combined_k141_11501   | [full]   | 1177   | No  | NA | 0     | 0  | Not-determined | Genome-fragment | NA              | 0     |
| S5-final-viral-combined_k141_74132   | [full]   | 2874   | No  | NA | 0     | 2  | Not-determined | Genome-fragment | NA              | 0     |
| S9-final-viral-combined_k141_23486   | [full]   | 1642   | No  | NA | 0     | 0  | Low-quality    | Genome-fragment | NA              | 2.61  |
| S1-final-viral-combined_k141_388155  | [full]   | 1642   | No  | NA | 1     | 0  | Low-quality    | Genome-fragment | NA              | 3.65  |
| S5-final-viral-combined_k141_47869   | [full]   | 1516   | No  | NA | 0     | 2  | Not-determined | Genome-fragment | NA              | 0     |
| S5-final-viral-combined_k141_181336  | [full]   | 3124   | No  | NA | 0     | 2  | Not-determined | Genome-fragment | NA              | 2.74  |
| S5-final-viral-combined_k141_167656  | [full]   | 1642   | No  | NA | 0     | 0  | Low-quality    | Genome-fragment | NA              | 0     |
| S5-final-viral-combined_k141_29272   | [full]   | 63967  | No  | NA | 20    | 6  | High-quality   | High-quality    | 100             | 0     |
| S5-final-viral-combined_k141_13270   | [full]   | 1642   | No  | NA | 0     | 0  | Low-quality    | Genome-fragment | NA              | 0.93  |
| S5-final-viral-combined_k141_17059   | [full]   | 1642   | No  | NA | 0     | 1  | Low-quality    | Genome-fragment | NA              | 0.52  |
| S7-final-viral-combined_k141_35551   | [full]   | 1642   | No  | NA | 0     | 1  | Low-quality    | Genome-fragment | NA              | 1.75  |
| S5-final-viral-combined_k141_74213   | [full]   | 2747   | No  | NA | 0     | 1  | Not-determined | Genome-fragment | NA              | 0     |
| S17-final-viral-combined_k141_20486  | [full]   | 1642   | No  | NA | 1     | 0  | Low-quality    | Genome-fragment | NA              | 3.94  |
| S5-final-viral-combined_k141_19307   | [full]   | 2091   | No  | NA | 0     | 1  | Not-determined | Genome-fragment | NA              | 0     |
| S5-final-viral-combined_k141_190295  | [full]   | 12056  | No  | NA | 0     | 0  | Not-determined | Genome-fragment | NA              | 0     |
| S17_k141_128942                      | [full]   | 1642   | No  | NA | 0     | 1  | Low-quality    | Genome-fragment | NA              | 0.43  |
| S12-final-viral-combined_k141_334976 | [full]   | 1642   | No  | NA | 0     | 1  | Low-quality    | Genome-fragment | NA              | 2.85  |
| S5-final-viral-combined_k141_207630  | [full]   | 4139   | No  | NA | 0     | 2  | Not-determined | Genome-fragment | NA              | 1.95  |
| S12_k141_1210409                     | [full]   | 1642   | No  | NA | 0     | 1  | Low-quality    | Genome-fragment | NA              | 0     |
| S5-final-viral-combined_k141_101070  | [full]   | 2443   | No  | NA | 0     | 0  | Not-determined | Genome-fragment | NA              | 0     |
| S4-final-viral-combined_k141_157589  | [full]   | 1642   | No  | NA | 0     | 0  | Low-quality    | Genome-fragment | NA              | 3.72  |
| S5-final-viral-combined_k141_15471   | [full]   | 2460   | No  | NA | 0     | 3  | Not-determined | Genome-fragment | NA              | 0     |
| S1-final-viral-combined_k141_386162  | [H2gene] | 1642   | No  | NA | 0     | 0  | Low-quality    | Genome-fragment | NA              | 2.74  |
| S5-final-viral-combined_k141_181520  | [full]   | 7127   | No  | NA | 1     | 6  | Not-determined | Genome-fragment | NA              | 0     |
| S5-final-viral-combined_k141_47992   | [full]   | 1108   | No  | NA | 0     | 1  | Not-determined | Genome-fragment | NA              | 0     |
| S5-final-viral-combined_k141_48027   | [full]   | 2068   | No  | NA | 0     | 0  | Not-determined | Genome-fragment | NA              | 0     |
| S5-final-viral-combined_k141_207746  | [full]   | 2142   | No  | NA | 0     | 1  | Not-determined | Genome-fragment | NA              | 0     |
| S5-final-viral-combined_k141_199172  | [full]   | 1643   | No  | NA | 3     | 0  | Low-quality    | Genome-fragment | NA              | 2.27  |
| S5-final-viral-combined_k141_154248  | [full]   | 1230   | No  | NA | 0     | 0  | Not-determined | Genome-fragment | NA              | 0     |
| S5-final-viral-combined_k141_103943  | [full]   | 1643   | No  | NA | 0     | 1  | Low-quality    | Genome-fragment | NA              | 3.29  |
| S5_k141_197235                       | [full]   | 1643   | No  | NA | 0     | 0  | Low-quality    | Genome-fragment | NA              | 1.51  |
| S5-final-viral-combined_k141_109454  | [full]   | 8037   | No  | NA | 0     | 1  | Not-determined | Genome-fragment | NA              | 0     |
| S7-final-viral-combined_k141_16448   | [full]   | 1642   | No  | NA | 0     | 2  | Low-quality    | Genome-fragment | NA              | 0.56  |
| S5-final-viral-combined_k141_92198   | [full]   | 1495   | No  | NA | 0     | 0  | Not-determined | Genome-fragment | NA              | 0     |
| S5-final-viral-combined_k141_48053   | [full]   | 1136   | No  | NA | 0     | 2  | Not-determined | Genome-fragment | NA              | 0     |
| S7-final-viral-combined_k141_18894   | [full]   | 1643   | No  | NA | 0     | 0  | Low-quality    | Genome-fragment | NA              | 2.52  |
| S5-final-viral-combined_k141_101218  | [full]   | 2771   | No  | NA | 0     | 1  | Not-determined | Genome-fragment | NA              | 0     |
| S5-final-viral-combined_k141_190415  | [full]   | 4818   | No  | NA | 0     | 4  | Not-determined | Genome-fragment | NA              | 0     |
| S17-final-viral-combined_k141_91067  | [full]   | 1643   | No  | NA | 0     | 2  | Low-quality    | Genome-fragment | NA              | 1.08  |
| S17_k141_257018                      | [full]   | 1643   | No  | NA | 0     | 0  | Low-quality    | Genome-fragment | NA              | 2.15  |
| S12-final-viral-combined_k141_8870   | [full]   | 1643   | No  | NA | 0     | 1  | Low-quality    | Genome-fragment | NA              | 1.14  |
| S8-final-viral-combined_k141_7245    | [full]   | 1643   | No  | NA | 0     | 0  | Low-quality    | Genome-fragment | NA              | 2.12  |
| S5-final-viral-combined_k141_29396   | [full]   | 1276   | No  | NA | 0     | 0  | Not-determined | Genome-fragment | NA              | 0     |
| S5-final-viral-combined_k141_109553  | [full]   | 2441   | No  | NA | 0     | 1  | Not-determined | Genome-fragment | NA              | 0     |
| S1-final-viral-combined_k141_5340    | [full]   | 1644   | No  | NA | 0     | 1  | Low-quality    | Genome-fragment | NA              | 2.96  |
| S5-final-viral-combined_k141_128122  | [full]   | 2272   | No  | NA | 0     | 0  | Not-determined | Genome-fragment | NA              | 0     |
| S1_k141_232685                       | [full]   | 1644   | No  | NA | 0     | 1  | Low-quality    | Genome-fragment | NA              | 5.7   |
| S17-final-viral-combined_k141_85515  | [full]   | 1644   | No  | NA | 1     | 0  | Low-quality    | Genome-fragment | NA              | 2.8   |
| S4-final-viral-combined_k141_79997   | [full]   | 1644   | No  | NA | 3     | 0  | Low-quality    | Genome-fragment | NA              | 3.68  |
| S5-final-viral-combined_k141_128161  | [full]   | 1799   | No  | NA | 0     | 2  | Not-determined | Genome-fragment | NA              | 0     |
| S8-final-viral-combined_k141_33450   | [full]   | 1644   | No  | NA | 0     | 0  | Low-quality    | Genome-fragment | NA              | 3.78  |
| S5-final-viral-combined_k141_154358  | [full]   | 6667   | No  | NA | 0     | 2  | Not-determined | Genome-fragment | NA              | 1.11  |
| S8-final-viral-combined_k141_216861  | [full]   | 1644   | No  | NA | 0     | 1  | Low-quality    | Genome-fragment | NA              | 0     |
| S5-final-viral-combined_k141_74353   | [full]   | 2432   | No  | NA | 0     | 2  | Not-determined | Genome-fragment | NA              | 0     |
| S9-final-viral-combined_k141_5977    | [full]   | 1645   | No  | NA | 0     | 0  | Low-quality    | Genome-fragment | NA              | 2.23  |
| S5-final-viral-combined_k141_198810  | [full]   | 5153   | No  | NA | 0     | 1  | Not-determined | Genome-fragment | NA              | 0     |
| S9-final-viral-combined_k141_37400   | [full]   | 1645   | No  | NA | 0     | 2  | Low-quality    | Genome-fragment | NA              | 0.81  |
| S11-final-viral-combined_k141_284787 | [full]   | 1645   | No  | NA | 0     | 0  | Low-quality    | Genome-fragment | NA              | 2.16  |
| S1_k141_4673                         | [full]   | 1645   | No  | NA | 0     | 1  | Low-quality    | Genome-fragment | NA              | 2.11  |
| S5-final-viral-combined_k141_74394   | [full]   | 3154   | No  | NA | 0     | 0  | Not-determined | Genome-fragment | NA              | 0     |
| S5-final-viral-combined_k141_207812  | [full]   | 1379   | No  | NA | 0     | 1  | Not-determined | Genome-fragment | NA              | 0     |
| S5-final-viral-combined_k141_172921  | [full]   | 1669   | No  | NA | 0     | 0  | Not-determined | Genome-fragment | NA              | 0     |
| S5-final-viral-combined_k141_4203    | [full]   | 5194   | No  | NA | 0     | 5  | Not-determined | Genome-fragment | NA              | 0     |
| S3_k141_133394                       | [full]   | 1645   | No  | NA | 0     | 0  | Low-quality    | Genome-fragment | NA              | 2.36  |
| S5-final-viral-combined_k141_107676  | [full]   | 1645   | No  | NA | 1     | 0  | Low-quality    | Genome-fragment | NA              | 4.05  |
| S5-final-viral-combined_k141_172920  | [full]   | 1426   | No  | NA | 0     | 2  | Not-determined | Genome-fragment | NA              | 0     |
| S5-final-viral-combined_k141_4215    | [full]   | 1491   | No  | NA | 0     | 0  | Not-determined | Genome-fragment | NA              | 0     |
| S5-final-viral-combined_k141_16073   | [full]   | 1645   | No  | NA | 2     | 0  | Low-quality    | Genome-fragment | NA              | 3.69  |
| S5-final-viral-combined_k141_6537    | [full]   | 3127   | No  | NA | 0     | 0  | Not-determined | Genome-fragment | NA              | 0     |
| S5-final-viral-combined_k141_146091  | [full]   | 1790   | No  | NA | 0     | 2  | Not-determined | Genome-fragment | NA              | 0     |
| S5-final-viral-combined_k141_65323   | [full]   | 2101   | No  | NA | 0     | 0  | Not-determined | Genome-fragment | NA              | 0     |
| S17_k141_112007                      | [full]   | 1645   | No  | NA | 0     | 1  | Low-quality    | Genome-fragment | NA              | 0.59  |
| S5-final-viral-combined_k141_4246    | [full]   | 2451   | No  | NA | 0     | 1  | Not-determined | Genome-fragment | NA              | 0     |
| S12-final-viral-combined_k141_130512 | [full]   | 1645   | No  | NA | 0     | 1  | Low-quality    | Genome-fragment | NA              | 0.47  |
| S12_k141_344296                      | [full]   | 1645   | No  | NA | 0     | 1  | Low-quality    | Genome-fragment | NA              | 0.57  |
| S12_k141_1314773                     | [full]   | 1645   | No  | NA | 0     | 0  | Low-quality    | Genome-fragment | NA              | 0.9   |
| S9-final-viral-combined_k141_114689  | [full]   | 1646   | No  | NA | 0     | 1  | Low-quality    | Genome-fragment | NA              | 1.86  |
| S5-final-viral-combined_k141_118672  | [full]   | 5754   | No  | NA | 0     | 4  | Not-determined | Genome-fragment | NA              | 0     |
| S5-final-viral-combined_k141_29447   | [full]   | 116107 | Yes | NA | 33613 | 13 | 46             | Medium-quality  | Genome-fragment | 61.36 |
| S5-final-viral-combined_k141_385141  | [full]   | 2286   | No  | NA | 0     | 0  | Not-determined | Genome-fragment | NA              | 71.05 |
| S5-final-viral-combined_k141_118684  | [full]   | 1522   | No  | NA | 0     | 0  | Not-determined | Genome-fragment | NA              | 0     |
| S5-final-viral-combined_k141_118700  | [full]   | 2192   | No  | NA | 0     | 0  | Not-determined | Genome-fragment | NA              | 0     |
| S11-final-viral-combined_k141_261833 | [full]   | 1646   | No  | NA | 0     | 0  | Low-quality    | Genome-fragment | NA              | 3.96  |
| S11-final-viral-combined_k141_160646 | [full]   | 1646   | No  | NA | 0     | 0  | Low-quality    | Genome-fragment | NA              | 1.66  |
| S11-final-viral-combined_k141_289399 | [full]   | 1646   | No  | NA | 0     | 0  | Low-quality    | Genome-fragment | NA              | 3.6   |
| S5-final-viral-combined_k141_11839   | [full]   | 2213   | No  | NA | 0     | 1  | Not-determined | Genome-fragment | NA              | 0     |
| S11_k141_126760                      | [full]   | 1646   | No  | NA | 0     | 0  | Low-quality    | Genome-fragment | NA              | 2.33  |
| S1-final-viral-combined_k141_291299  | [full]   | 1646   | No  | NA | 0     | 1  | Low-quality    | Genome-fragment | NA              | 1.1   |
| S1-final-viral-combined_k141_311613  | [full]   | 1646   | No  | NA | 1     | 0  | Low-quality    | Genome-fragment | NA              | 3.47  |
| S5-final-viral-combined_k141_146111  | [full]   | 39278  | No  | NA | 0     | 1  | Not-determined | Genome-fragment | NA              | 0     |
| S1-final-viral-combined_k141_80688   | [full]   | 1646   | No  | NA | 2     | 0  | Low-quality    | Genome-fragment | NA              | 4.82  |
| S3-final-viral-combined_k141_114687  | [full]   | 1646   | No  | NA | 0     | 1  | Low-quality    | Genome-fragment | NA              | 3.53  |
| S5-final-viral-combined_k141_182590  | [full]   | 1646   | No  | NA | 0     | 0  | Low-quality    | Genome-fragment | NA              | 3.12  |
| S5-final-viral-combined_k141_154442  | [full]   | 3780   | No  | NA | 0     | 2  | Not-determined | Genome-fragment | NA              | 0     |
| S12-final-viral-combined_k141_129430 | [full]   | 1646   | No  | NA | 1     | 0  | Low-quality    | Genome-fragment | NA              | 1.54  |
| S12-final-viral-combined_k141_341091 | [H2gene] | 1646   | No  | NA | 0     | 1  | Low-quality    | Genome-fragment | NA              | 6.06  |
| S2-final-viral-combined_k141_23515   | [full]   | 1646   | No  | NA | 0     | 1  | Low-quality    | Genome-fragment | NA              | 0.83  |
| S6-final-viral-combined_k141_91735   | [full]   | 1646   | No  | NA | 0     | 0  | Low-quality    | Genome-fragment | NA              | 5.1   |
| S5-final-viral-combined_k141_11872   | [full]   | 1959   | No  | NA | 0     | 0  | Not-determined | Genome-fragment | NA              | 0     |
| S5-final-viral-combined_k141_190136  | [full]   | 4706   | No  | NA | 0     | 2  | Not-determined | Genome-fragment | NA              | 0     |
| S5-final-viral-combined_k141_18505   | [full]   | 3521   | No  | NA | 0     | 1  | Not-determined | Genome-fragment | NA              | 0     |
| S6-final-viral-combined_k141_39968   | [full]   | 1646   | No  | NA | 1     | 0  | Low-quality    | Genome-fragment | NA              | 3.63  |
| S5-final-viral-combined_k141_65439   | [full]   | 4449   | No  | NA | 0     | 1  | Not-determined | Genome-fragment | NA              | 0     |
| S11-final-viral-combined_k141_154730 | [full]   | 1647   | No  | NA | 0     | 0  | Low-quality    | Genome-fragment | NA              | 3.77  |
| S11_k141_170813                      | [full]   | 1647   | No  | NA | 0     | 0  | Low-quality    | Genome-fragment | NA              | 2.19  |
| S5-final-viral-combined_k141_330043  | [full]   | 1206   | No  | NA | 0     | 1  | Not-determined | Genome-fragment | NA              | 0     |
| S5-final-viral-combined_k141_136497  | [full]   | 1271   | No  | NA | 0     | 1  | Not-determined | Genome-fragment | NA              | 0     |
| S1-final-viral-combined_k141_203196  | [full]   | 1647   | No  | NA | 1     | 0  | Low-quality    | Genome-fragment | NA              | 3.91  |
| S5-final-viral-combined_k141_74610   | [full]   | 1028   | No  | NA | 0     | 1  | Not-determined | Genome-fragment | NA              | 0     |
| S1-final-viral-combined_k141_334430  | [full]   | 1647   | No  | NA | 0     | 0  | Low-quality    | Genome-fragment | NA              | 4.25  |
| S5-final-viral-combined_k141_56188   | [full]   | 55731  | No  | NA | 0     |    |                |                 |                 |       |



|                                      |          |       |     |       |    |    |                |                 |       |       |
|--------------------------------------|----------|-------|-----|-------|----|----|----------------|-----------------|-------|-------|
| S5-final-viral-combined_k141_296588  | [Full]   | 4353  | No  | NA    | 0  | 0  | Not-determined | Genome-fragment | NA    | 0     |
| S5-final-viral-combined_k141_26387   | [Full]   | 1165  | No  | NA    | 0  | 1  | Not-determined | Genome-fragment | NA    | 0     |
| S5-final-viral-combined_k141_163693  | [Full]   | 6016  | No  | NA    | 0  | 4  | Not-determined | Genome-fragment | NA    | 0     |
| S1-final-viral-combined_k141_42142   | [Full]   | 1650  | No  | NA    | 0  | 1  | Low-quality    | Genome-fragment | 1.44  | 0     |
| S1_k141_18248                        |          | 1650  | No  | NA    | 1  | 0  | Low-quality    | Genome-fragment | 4.16  | 0     |
| S5-final-viral-combined_k141_56391   | [Full]   | 2812  | No  | NA    | 0  | 0  | Not-determined | Genome-fragment | NA    | 0     |
| S5-final-viral-combined_k141_29697   | [Full]   | 1331  | No  | NA    | 0  | 1  | Not-determined | Genome-fragment | NA    | 0     |
| S5_k141_50909                        |          | 1650  | No  | NA    | 0  | 1  | Low-quality    | Genome-fragment | 0.43  | 0     |
| S5-final-viral-combined_k141_146297  | [Full]   | 1394  | No  | NA    | 0  | 0  | Not-determined | Genome-fragment | NA    | 0     |
| S7-final-viral-combined_k141_164832  | [Full]   | 1650  | No  | NA    | 1  | 0  | Low-quality    | Genome-fragment | 0.67  | 0     |
| S5-final-viral-combined_k141_199135  | [Full]   | 32729 | No  | NA    | 16 | 0  | Medium-quality | Genome-fragment | 80.45 | 0     |
| S7-final-viral-combined_k141_179451  | [Full]   | 1650  | No  | NA    | 0  | 0  | Low-quality    | Genome-fragment | 0.72  | 0     |
| S12-final-viral-combined_k141_303550 | [Full]   | 1650  | No  | NA    | 0  | 1  | Low-quality    | Genome-fragment | 3.17  | 0     |
| S5-final-viral-combined_k141_154804  | [Full]   | 4341  | No  | NA    | 0  | 0  | Not-determined | Genome-fragment | NA    | 0     |
| S12-final-viral-combined_k141_36753  | [Full]   | 1650  | No  | NA    | 0  | 3  | Low-quality    | Genome-fragment | 0.54  | 0     |
| S3-final-viral-combined_k141_62345   | [Full]   | 1651  | No  | NA    | 3  | 0  | Low-quality    | Genome-fragment | 2.76  | 0     |
| S7-final-viral-combined_k141_26896   | [Full]   | 1651  | No  | NA    | 0  | 0  | Low-quality    | Genome-fragment | 2.9   | 0     |
| S12-final-viral-combined_k141_258339 | [Full]   | 1651  | No  | NA    | 1  | 0  | Low-quality    | Genome-fragment | 3.49  | 0     |
| S5-final-viral-combined_k141_29750   | [Full]   | 1566  | No  | NA    | 0  | 0  | Not-determined | Genome-fragment | NA    | 0     |
| S5-final-viral-combined_k141_136845  | [Full]   | 1567  | No  | NA    | 0  | 1  | Not-determined | Genome-fragment | NA    | 0     |
| S5-final-viral-combined_k141_173266  | [Full]   | 5636  | No  | NA    | 0  | 7  | Not-determined | Genome-fragment | NA    | 0     |
| S3-final-viral-combined_k141_134054  | [Full]   | 1651  | No  | NA    | 2  | 0  | Low-quality    | Genome-fragment | 2.99  | 0     |
| S5-final-viral-combined_k141_101638  | [Full]   | 5876  | No  | NA    | 0  | 7  | Not-determined | Genome-fragment | NA    | 0     |
| S5-final-viral-combined_k141_146354  | [Full]   | 4350  | No  | NA    | 0  | 0  | Not-determined | Genome-fragment | NA    | 0     |
| S5-final-viral-combined_k141_199164  | [Full]   | 2530  | No  | NA    | 0  | 2  | Not-determined | Genome-fragment | NA    | 0     |
| S11-final-viral-combined_k141_165296 | [Full]   | 1652  | No  | NA    | 0  | 0  | Low-quality    | Genome-fragment | 0.84  | 0     |
| S1-final-viral-combined_k141_106220  | [Full]   | 1652  | No  | NA    | 1  | 0  | Low-quality    | Genome-fragment | 4.59  | 0     |
| S5-final-viral-combined_k141_74945   | [Full]   | 2036  | No  | NA    | 0  | 2  | Not-determined | Genome-fragment | NA    | 0     |
| S5-final-viral-combined_k141_173121  | [Full]   | 7995  | No  | NA    | 0  | 4  | Not-determined | Genome-fragment | NA    | 0     |
| S5-final-viral-combined_k141_4687    | [Full]   | 1288  | No  | NA    | 0  | 1  | Not-determined | Genome-fragment | NA    | 0     |
| S5-final-viral-combined_k141_199195  | [Full]   | 1723  | No  | NA    | 0  | 0  | Not-determined | Genome-fragment | NA    | 0     |
| S17-final-viral-combined_k141_221517 | [H2gene] | 1652  | No  | NA    | 0  | 0  | Low-quality    | Genome-fragment | 1.92  | 0     |
| S5-final-viral-combined_k141_190771  | [Full]   | 1066  | No  | NA    | 0  | 0  | Not-determined | Genome-fragment | NA    | 0     |
| S5-final-viral-combined_k141_118985  | [Full]   | 2314  | No  | NA    | 0  | 4  | Not-determined | Genome-fragment | NA    | 0     |
| S5-final-viral-combined_k141_101745  | [Full]   | 1366  | No  | NA    | 0  | 1  | Not-determined | Genome-fragment | NA    | 0     |
| S1-final-viral-combined_k141_162741  | [Full]   | 1653  | No  | NA    | 0  | 0  | Low-quality    | Genome-fragment | 3.56  | 0     |
| S6-final-viral-combined_k141_123233  | [Full]   | 1653  | No  | NA    | 0  | 2  | Low-quality    | Genome-fragment | 0.53  | 0     |
| S5-final-viral-combined_k141_32743   | [Full]   | 3054  | No  | NA    | 0  | 1  | Not-determined | Genome-fragment | NA    | 0     |
| S5-final-viral-combined_k141_65573   | [Full]   | 1752  | No  | NA    | 0  | 2  | Not-determined | Genome-fragment | NA    | 0     |
| S1-final-viral-combined_k141_18149   | [Full]   | 1654  | No  | NA    | 2  | 0  | Low-quality    | Genome-fragment | 4.21  | 0     |
| S5-final-viral-combined_k141_56493   | [Full]   | 1934  | No  | NA    | 0  | 1  | Not-determined | Genome-fragment | NA    | 0     |
| S5-final-viral-combined_k141_20709   | [Full]   | 1044  | No  | NA    | 0  | 0  | Not-determined | Genome-fragment | NA    | 0     |
| S5-final-viral-combined_k141_4760    | [Full]   | 1352  | No  | NA    | 0  | 0  | Not-determined | Genome-fragment | NA    | 0     |
| S5-final-viral-combined_k141_83370   | [Full]   | 55883 | Yes | 32897 | 8  | 13 | Medium-quality | Genome-fragment | 63.84 | 41.13 |
| S1_k141_76249                        |          | 1654  | No  | NA    | 2  | 0  | Low-quality    | Genome-fragment | 2.95  | 0     |
| S5-final-viral-combined_k141_75350   | [Full]   | 1654  | No  | NA    | 0  | 0  | Low-quality    | Genome-fragment | 2.8   | 0     |
| S17-final-viral-combined_k141_144815 | [Full]   | 1654  | No  | NA    | 0  | 1  | Low-quality    | Genome-fragment | 2.65  | 0     |
| S5-final-viral-combined_k141_38875   | [Full]   | 1104  | No  | NA    | 0  | 1  | Not-determined | Genome-fragment | NA    | 0     |
| S17-final-viral-combined_k141_174157 | [Full]   | 1654  | No  | NA    | 0  | 0  | Low-quality    | Genome-fragment | 3.32  | 0     |
| S11-final-viral-combined_k141_212048 | [Full]   | 1655  | No  | NA    | 0  | 0  | Low-quality    | Genome-fragment | 3.69  | 0     |
| S5-final-viral-combined_k141_12295   | [Full]   | 28602 | No  | NA    | 0  | 6  | Not-determined | Genome-fragment | NA    | 0     |
| S5-final-viral-combined_k141_83412   | [Full]   | 29291 | No  | NA    | 14 | 1  | Medium-quality | Genome-fragment | 75.69 | 0     |
| S5-final-viral-combined_k141_199284  | [Full]   | 1355  | No  | NA    | 0  | 2  | Not-determined | Genome-fragment | NA    | 0     |
| S3-final-viral-combined_k141_53780   | [Full]   | 1655  | No  | NA    | 0  | 0  | Low-quality    | Genome-fragment | 3.36  | 0     |
| S5-final-viral-combined_k141_83458   | [Full]   | 1552  | No  | NA    | 0  | 0  | Not-determined | Genome-fragment | NA    | 0     |
| S5-final-viral-combined_k141_119091  | [Full]   | 1596  | No  | NA    | 0  | 1  | Not-determined | Genome-fragment | NA    | 0     |
| S5-final-viral-combined_k141_4834    | [Full]   | 3314  | No  | NA    | 0  | 1  | Not-determined | Genome-fragment | NA    | 0     |
| S1_k141_22540                        |          | 1655  | No  | NA    | 0  | 1  | Low-quality    | Genome-fragment | 3.52  | 0     |
| S17-final-viral-combined_k141_245398 | [Full]   | 1655  | No  | NA    | 0  | 0  | Low-quality    | Genome-fragment | 3.2   | 0     |
| S12-final-viral-combined_k141_240337 | [Full]   | 1655  | No  | NA    | 1  | 0  | Low-quality    | Genome-fragment | 2.69  | 0     |
| S11-final-viral-combined_k141_245933 | [Full]   | 1656  | No  | NA    | 0  | 0  | Low-quality    | Genome-fragment | 3.75  | 0     |
| S1-final-viral-combined_k141_161515  | [Full]   | 1656  | No  | NA    | 0  | 0  | Low-quality    | Genome-fragment | 1.4   | 0     |
| S5-final-viral-combined_k141_65673   | [Full]   | 3578  | No  | NA    | 0  | 3  | Not-determined | Genome-fragment | NA    | 0     |
| S1-final-viral-combined_k141_374161  | [H2gene] | 1656  | No  | NA    | 1  | 0  | Low-quality    | Genome-fragment | 3.15  | 0     |
| S5-final-viral-combined_k141_794201  | [Full]   | 1656  | No  | NA    | 0  | 1  | Low-quality    | Genome-fragment | 2.34  | 0     |
| S5-final-viral-combined_k141_173414  | [Full]   | 9747  | No  | NA    | 0  | 4  | Not-determined | Genome-fragment | NA    | 0     |
| S17-final-viral-combined_k141_57326  | [H2gene] | 1656  | No  | NA    | 1  | 0  | Low-quality    | Genome-fragment | 3.95  | 0     |
| S5-final-viral-combined_k141_75140   | [Full]   | 3031  | No  | NA    | 0  | 2  | Not-determined | Genome-fragment | NA    | 0     |
| S5-final-viral-combined_k141_146431  | [Full]   | 3245  | No  | NA    | 0  | 0  | Not-determined | Genome-fragment | NA    | 0     |
| S5-final-viral-combined_k141_208326  | [Full]   | 2993  | No  | NA    | 0  | 1  | Not-determined | Genome-fragment | NA    | 0     |
| S5-final-viral-combined_k141_83541   | [Full]   | 1551  | No  | NA    | 0  | 0  | Not-determined | Genome-fragment | NA    | 0     |
| S2_k141_27333                        |          | 1656  | No  | NA    | 0  | 0  | Low-quality    | Genome-fragment | 3.73  | 0     |
| S5-final-viral-combined_k141_110057  | [Full]   | 1868  | No  | NA    | 0  | 0  | Not-determined | Genome-fragment | NA    | 0     |
| S6-final-viral-combined_k141_7281    | [Full]   | 1656  | No  | NA    | 3  | 0  | Low-quality    | Genome-fragment | 2.06  | 0     |
| S8-final-viral-combined_k141_139576  | [Full]   | 1656  | No  | NA    | 0  | 2  | Low-quality    | Genome-fragment | 2.87  | 0     |
| S3-final-viral-combined_k141_41644   | [Full]   | 1657  | No  | NA    | 0  | 0  | Low-quality    | Genome-fragment | 2.83  | 0     |
| S5-final-viral-combined_k141_208373  | [Full]   | 2947  | No  | NA    | 0  | 0  | Not-determined | Genome-fragment | NA    | 0     |
| S3-final-viral-combined_k141_105633  | [Full]   | 1657  | No  | NA    | 0  | 0  | Low-quality    | Genome-fragment | 1.04  | 0     |
| S5-final-viral-combined_k141_38975   | [Full]   | 1589  | No  | NA    | 0  | 2  | Not-determined | Genome-fragment | NA    | 0     |
| S7-final-viral-combined_k141_236563  | [Full]   | 1657  | No  | NA    | 2  | 0  | Low-quality    | Genome-fragment | 2.43  | 0     |
| S5-final-viral-combined_k141_101877  | [Full]   | 2242  | No  | NA    | 0  | 0  | Not-determined | Genome-fragment | NA    | 0     |
| S5-final-viral-combined_k141_101880  | [Full]   | 2024  | No  | NA    | 0  | 1  | Not-determined | Genome-fragment | NA    | 0     |
| S5-final-viral-combined_k141_163900  | [Full]   | 1501  | No  | NA    | 0  | 2  | Not-determined | Genome-fragment | NA    | 0     |
| S12-final-viral-combined_k141_342952 | [Full]   | 1657  | No  | NA    | 0  | 2  | Low-quality    | Genome-fragment | 0.53  | 0     |
| S5-final-viral-combined_k141_146498  | [Full]   | 3021  | No  | NA    | 0  | 1  | Not-determined | Genome-fragment | NA    | 0     |
| S2-final-viral-combined_k141_40852   | [Full]   | 1657  | No  | NA    | 0  | 0  | Low-quality    | Genome-fragment | 3.85  | 0     |
| S5-final-viral-combined_k141_4998    | [Full]   | 2207  | No  | NA    | 0  | 3  | Not-determined | Genome-fragment | NA    | 0     |
| S5-final-viral-combined_k141_5021    | [Full]   | 1939  | No  | NA    | 0  | 2  | Not-determined | Genome-fragment | NA    | 0     |
| S5-final-viral-combined_k141_29882   | [Full]   | 5075  | No  | NA    | 0  | 1  | Not-determined | Genome-fragment | NA    | 0     |
| S5-final-viral-combined_k141_146544  | [Full]   | 1719  | No  | NA    | 0  | 2  | Not-determined | Genome-fragment | NA    | 0     |
| S5-final-viral-combined_k141_29897   | [Full]   | 1448  | No  | NA    | 0  | 0  | Not-determined | Genome-fragment | NA    | 0     |
| S5-final-viral-combined_k141_836201  | [Full]   | 1570  | No  | NA    | 0  | 0  | Not-determined | Genome-fragment | NA    | 0     |
| S5-final-viral-combined_k141_137021  | [Full]   | 8932  | No  | NA    | 0  | 3  | Not-determined | Genome-fragment | NA    | 0     |
| S5-final-viral-combined_k141_56781   | [Full]   | 1636  | No  | NA    | 0  | 0  | Not-determined | Genome-fragment | NA    | 0     |
| S8-final-viral-combined_k141_274607  | [H2gene] | 1657  | No  | NA    | 0  | 0  | Low-quality    | Genome-fragment | 4.62  | 0     |
| S5-final-viral-combined_k141_56782   | [Full]   | 1782  | No  | NA    | 0  | 2  | Not-determined | Genome-fragment | NA    | 0     |
| S9-final-viral-combined_k141_75120   | [Full]   | 1658  | No  | NA    | 0  | 1  | Low-quality    | Genome-fragment | 4.83  | 0     |
| S9-final-viral-combined_k141_30488   | [Full]   | 1658  | No  | NA    | 0  | 0  | Low-quality    | Genome-fragment | 4.17  | 0     |
| S5-final-viral-combined_k141_39039   | [Full]   | 1446  | No  | NA    | 0  | 2  | Not-determined | Genome-fragment | NA    | 0     |
| S11_k141_10765                       |          | 1658  | No  | NA    | 0  | 0  | Low-quality    | Genome-fragment | 2.77  | 0     |
| S11_k141_109163                      |          | 1658  | No  | NA    | 0  | 1  | Low-quality    | Genome-fragment | 4.23  | 0     |
| S5-final-viral-combined_k141_208457  | [Full]   | 2457  | No  | NA    | 0  | 1  | Not-determined | Genome-fragment | NA    | 0     |
| S5-final-viral-combined_k141_48739   | [Full]   | 4709  | No  | NA    | 0  | 3  | Not-determined | Genome-fragment | NA    | 0     |
| S5-final-viral-combined_k141_5081    | [Full]   | 1053  | No  | NA    | 0  | 0  | Not-determined | Genome-fragment | NA    | 0     |
| S5-final-viral-combined_k141_56879   | [Full]   | 1411  | No  | NA    | 0  | 1  | Not-determined | Genome-fragment | NA    | 0     |
| S5-final-viral-combined_k141_191077  | [Full]   | 3953  | No  | NA    | 0  | 2  | Not-determined | Genome-fragment | NA    | 0     |
| S5-final-viral-combined_k141_39097   | [Full]   | 3382  | No  | NA    | 0  | 0  | Not-determined | Genome-fragment | NA    | 0     |
| S5-final-viral-combined_k141_137100  | [Full]   | 1776  | No  | NA    | 0  | 1  | Not-determined | Genome-fragment | NA    | 0     |
| S7-final-viral-combined_k141_2204    | [Full]   | 1658  | No  | NA    | 0  | 0  | Low-quality    | Genome-fragment | 9.28  | 0     |
| S17-final-viral-combined_k141_106947 | [Full]   | 1658  | No  | NA    | 0  | 0  | Low-quality    | Genome-fragment | 2.09  | 0     |
| S5-final-viral-combined_k141_154937  | [Full]   | 3410  | No  | NA    | 0  | 1  | Not-determined | Genome-fragment | NA    | 0     |
| S5-final-viral-combined_k141_139458  | [Full]   | 1875  | No  | NA    | 0  | 0  | Not-determined | Genome-fragment | NA    | 0     |
| S12_k141_242187                      |          | 1658  | No  | NA    | 0  | 1  | Low-quality    | Genome-fragment | 0.4   | 0     |
| S5-final-viral-combined_k141_119438  | [Full]   | 3096  | No  | NA    | 0  | 1  | Not-determined | Genome-fragment | NA    | 0     |
| S4-final-viral-combined_k141_110997  | [Full]   | 1658  | No  | NA    | 0  | 2  | Low-quality    | Genome-fragment | 2.73  | 0     |
| S6_k141_28418                        |          | 1658  | No  | NA    | 1  | 0  | Low-quality    | Genome-fragment | 2.61  | 0     |
| S5-final-viral-combined_k141_119465  | [Full]   | 6063  | No  | NA    | 0  | 2  | Not-determined | Genome-fragment | NA    | 0     |
| S5-final-viral-combined_k141_102167  | [Full]   | 2813  | No  | NA    | 0  | 0  | Not-determined | Genome-fragment | NA    | 0     |
| S8-final-viral-combined_k141_36216   | [Full]   | 1658  | No  | NA    | 0  | 0  | Low-quality    | Genome-fragment | 2.02  | 0     |
| S5-final-viral-combined_k141_83720   | [Full]   | 1546  | No  | NA    | 0  | 1  | Not-determined | Genome-fragment | NA    | 0     |
| S5-final-viral-combined_k141_62984   | [Full]   | 1249  | No  | NA    | 0  | 1  | Not-determined | Genome-fragment | NA    | 0     |
| S5-final-viral-combined_k141_181570  | [Full]   | 7557  | No  | NA    | 0  | 1  | Not-determined | Genome-fragment | NA    | 0     |
| S5-final-viral-combined_k141_66017   | [Full]   | 32630 | No  | NA    | 19 | 0  | Medium-quality | Genome-fragment | 79.35 | 0     |
| S8_k141_117090                       |          | 1658  | No  | NA    | 0  | 1  | Low-quality    | Genome-fragment | 0.45  | 0     |
| S8_k141_252120                       |          | 1658  | No  | NA    | 1  | 0  | Low-quality    | Genome-fragment | 1.6   | 0     |
| S5-final-viral-combined_k141_128867  | [Full]   | 1411  | No  | NA    | 0  | 1  | Not-determined | Genome-fragment | NA    | 0     |
| S5-final-viral-combined_k141_102186  | [Full]   | 1956  | No  | NA    | 0  | 2  | Not-determined | Genome-fragment | NA    | 0     |
| S9-final-viral-combined_k141_50977   | [Full]   | 1659  | No  | NA    | 0  | 0  | Low-quality    | Genome-fragment | 3.48  | 0     |
| S5-final-viral-combined_k141_83774   | [Full]   | 1709  | No  | NA    | 0  | 1  | Not-determined | Genome-fragment | NA    | 0     |
| S5-final-viral-combined_k141_182017  | [Full]   | 6939  | No  | NA    | 0  | 4  | Not-determined | Genome-fragment | NA    | 0     |
| S5                                   |          |       |     |       |    |    |                |                 |       |       |



|                                      |          |       |     |       |    |    |                |                 |    |       |      |
|--------------------------------------|----------|-------|-----|-------|----|----|----------------|-----------------|----|-------|------|
| S5-final-viral-combined_k141_93192   | [full]   | 1000  | No  | NA    | 0  | 0  | Not-determined | Genome-fragment | NA |       | 0    |
| S7-final-viral-combined_k141_75534   | [full]   | 1661  | No  | NA    | 0  | 1  | Low-quality    | Genome-fragment | NA | 3.19  | 0    |
| S5-final-viral-combined_k141_30098   | [full]   | 6194  | No  | NA    | 0  | 4  | Not-determined | Genome-fragment | NA |       | 0    |
| S5-final-viral-combined_k141_110551  | [full]   | 1232  | No  | NA    | 0  | 0  | Not-determined | Genome-fragment | NA |       | 0    |
| S17-final-viral-combined_k141_186437 | [full]   | 1661  | No  | NA    | 0  | 2  | Low-quality    | Genome-fragment | NA | 0.95  | 0    |
| S17-final-viral-combined_k141_144060 | [full]   | 1661  | No  | NA    | 0  | 2  | Low-quality    | Genome-fragment | NA | 2.68  | 0    |
| S5-final-viral-combined_k141_66283   | [full]   | 2409  | No  | NA    | 0  | 0  | Not-determined | Genome-fragment | NA |       | 0    |
| S5-final-viral-combined_k141_139456  | [full]   | 1933  | No  | NA    | 0  | 2  | Not-determined | Genome-fragment | NA |       | 0    |
| S5-final-viral-combined_k141_84001   | [full]   | 4428  | No  | NA    | 0  | 3  | Not-determined | Genome-fragment | NA |       | 0    |
| S5-final-viral-combined_k141_146897  | [full]   | 1772  | No  | NA    | 0  | 1  | Not-determined | Genome-fragment | NA |       | 0    |
| S17-final-viral-combined_k141_254409 | [full]   | 1661  | No  | NA    | 0  | 0  | Low-quality    | Genome-fragment | NA | 2.27  | 0    |
| S12-final-viral-combined_k141_103801 | [full]   | 1661  | No  | NA    | 0  | 0  | Low-quality    | Genome-fragment | NA | 5.08  | 0    |
| S5-final-viral-combined_k141_164301  | [full]   | 1858  | No  | NA    | 0  | 0  | Not-determined | Genome-fragment | NA |       | 0    |
| S12-final-viral-combined_k141_307595 | [full]   | 1661  | No  | NA    | 0  | 0  | Low-quality    | Genome-fragment | NA | 0.85  | 0    |
| S5-final-viral-combined_k141_137523  | [full]   | 1661  | No  | NA    | 0  | 0  | Low-quality    | Genome-fragment | NA | 1.19  | 0    |
| S11-final-viral-combined_k141_124957 | [full]   | 4321  | No  | NA    | 0  | 1  | Not-determined | Genome-fragment | NA |       | 0    |
| S11-final-viral-combined_k141_155490 | [full]   | 1662  | No  | NA    | 1  | 0  | Low-quality    | Genome-fragment | NA | 2.67  | 0    |
| S5-final-viral-combined_k141_120523  | [full]   | 1914  | No  | NA    | 0  | 2  | Not-determined | Genome-fragment | NA | 3.67  | 0    |
| S5-final-viral-combined_k141_93265   | [full]   | 2252  | No  | NA    | 0  | 1  | Not-determined | Genome-fragment | NA |       | 0    |
| S5-final-viral-combined_k141_159212  | [full]   | 1662  | No  | NA    | 0  | 0  | Low-quality    | Genome-fragment | NA | 1.18  | 0    |
| S17-final-viral-combined_k141_255778 | [full]   | 1662  | No  | NA    | 0  | 0  | Low-quality    | Genome-fragment | NA | 3.09  | 0    |
| S5-final-viral-combined_k141_13076   | [full]   | 2171  | No  | NA    | 0  | 0  | Not-determined | Genome-fragment | NA |       | 0    |
| S5-final-viral-combined_k141_173923  | [full]   | 7686  | No  | NA    | 0  | 0  | Not-determined | Genome-fragment | NA |       | 0    |
| S5-final-viral-combined_k141_75624   | [full]   | 1688  | No  | NA    | 0  | 3  | Not-determined | Genome-fragment | NA |       | 0    |
| S5-final-viral-combined_k141_49002   | [full]   | 2914  | No  | NA    | 0  | 2  | Not-determined | Genome-fragment | NA |       | 0    |
| S5-final-viral-combined_k141_30244   | [full]   | 5129  | No  | NA    | 0  | 1  | Not-determined | Genome-fragment | NA |       | 0    |
| S5-final-viral-combined_k141_164404  | [full]   | 1431  | No  | NA    | 0  | 1  | Not-determined | Genome-fragment | NA |       | 0    |
| S4-final-viral-combined_k141_162741  | [full]   | 1662  | No  | NA    | 0  | 1  | Low-quality    | Genome-fragment | NA | 2.58  | 0    |
| S5-final-viral-combined_k141_164409  | [full]   | 4964  | No  | NA    | 0  | 5  | Not-determined | Genome-fragment | NA |       | 0    |
| S8-final-viral-combined_k141_207839  | [R2gene] | 1662  | No  | NA    | 1  | 0  | Low-quality    | Genome-fragment | NA | 4.41  | 0    |
| S9-final-viral-combined_k141_844689  | [full]   | 1663  | No  | NA    | 0  | 0  | Low-quality    | Genome-fragment | NA | 4.38  | 0    |
| S5-final-viral-combined_k141_20858   | [full]   | 2698  | No  | NA    | 0  | 0  | Not-determined | Genome-fragment | NA |       | 0    |
| S11_k141_72220                       |          | 1663  | No  | NA    | 0  | 0  | Low-quality    | Genome-fragment | NA | 1.1   | 0    |
| S11_k141_72236                       |          | 1663  | No  | NA    | 0  | 0  | Low-quality    | Genome-fragment | NA | 1.1   | 0    |
| S5-final-viral-combined_k141_84201   | [full]   | 8120  | No  | NA    | 0  | 0  | Not-determined | Genome-fragment | NA |       | 0    |
| S1-final-viral-combined_k141_209523  | [full]   | 1663  | No  | NA    | 1  | 0  | Low-quality    | Genome-fragment | NA | 4.16  | 0    |
| S1-final-viral-combined_k141_14432   | [full]   | 1663  | No  | NA    | 0  | 1  | Low-quality    | Genome-fragment | NA | 2.61  | 0    |
| S5_k141_190693                       |          | 1663  | No  | NA    | 1  | 0  | Low-quality    | Genome-fragment | NA | 4.82  | 0    |
| S5_k141_77599                        |          | 1663  | No  | NA    | 0  | 1  | Low-quality    | Genome-fragment | NA | 0.85  | 0    |
| S7-final-viral-combined_k141_173915  | [full]   | 1663  | No  | NA    | 0  | 1  | Low-quality    | Genome-fragment | NA | 0.93  | 0    |
| S5-final-viral-combined_k141_129198  | [full]   | 2355  | No  | NA    | 0  | 0  | Not-determined | Genome-fragment | NA |       | 0    |
| S5-final-viral-combined_k141_5660    | [full]   | 6912  | No  | NA    | 0  | 7  | Not-determined | Genome-fragment | NA |       | 0    |
| S5-final-viral-combined_k141_75735   | [full]   | 3491  | No  | NA    | 0  | 2  | Not-determined | Genome-fragment | NA |       | 0    |
| S5-final-viral-combined_k141_174088  | [full]   | 1403  | No  | NA    | 0  | 2  | Not-determined | Genome-fragment | NA |       | 0    |
| S17-final-viral-combined_k141_209767 | [full]   | 1663  | No  | NA    | 0  | 1  | Low-quality    | Genome-fragment | NA | 1.08  | 0    |
| S4-final-viral-combined_k141_88906   | [full]   | 1663  | No  | NA    | 0  | 1  | Low-quality    | Genome-fragment | NA | 1.23  | 0    |
| S5-final-viral-combined_k141_93371   | [full]   | 1688  | No  | NA    | 0  | 1  | Not-determined | Genome-fragment | NA |       | 0    |
| S5-final-viral-combined_k141_129151  | [full]   | 1815  | No  | NA    | 0  | 2  | Not-determined | Genome-fragment | NA |       | 0    |
| S8-final-viral-combined_k141_24556   | [full]   | 1663  | No  | NA    | 0  | 0  | Low-quality    | Genome-fragment | NA | 2.78  | 0    |
| S9-final-viral-combined_k141_122429  | [full]   | 1664  | No  | NA    | 2  | 0  | Low-quality    | Genome-fragment | NA | 4.41  | 0    |
| S5-final-viral-combined_k141_200060  | [full]   | 2238  | No  | NA    | 0  | 0  | Not-determined | Genome-fragment | NA |       | 0    |
| S9-final-viral-combined_k141_72830   | [R2gene] | 1664  | No  | NA    | 2  | 0  | Low-quality    | Genome-fragment | NA | 5.08  | 0    |
| S5-final-viral-combined_k141_110880  | [full]   | 3106  | No  | NA    | 0  | 1  | Not-determined | Genome-fragment | NA |       | 0    |
| S11-final-viral-combined_k141_228977 | [full]   | 1664  | No  | NA    | 0  | 0  | Low-quality    | Genome-fragment | NA | 1.02  | 0    |
| S1-final-viral-combined_k141_206148  | [full]   | 1664  | No  | NA    | 1  | 0  | Low-quality    | Genome-fragment | NA | 3.1   | 0    |
| S5-final-viral-combined_k141_93388   | [full]   | 1823  | No  | NA    | 0  | 0  | Not-determined | Genome-fragment | NA |       | 0    |
| S5-final-viral-combined_k141_5765    | [full]   | 2025  | No  | NA    | 0  | 0  | Not-determined | Genome-fragment | NA |       | 0    |
| S5-final-viral-combined_k141_164451  | [full]   | 1214  | No  | NA    | 0  | 2  | Not-determined | Genome-fragment | NA |       | 0    |
| S5-final-viral-combined_k141_46069   | [full]   | 1664  | No  | NA    | 0  | 0  | Low-quality    | Genome-fragment | NA | 1.56  | 0    |
| S5-final-viral-combined_k141_129296  | [full]   | 1271  | No  | NA    | 0  | 1  | Not-determined | Genome-fragment | NA |       | 0    |
| S5-final-viral-combined_k141_182293  | [full]   | 1643  | No  | NA    | 0  | 1  | Not-determined | Genome-fragment | NA |       | 0    |
| S12_k141_83456                       |          | 1664  | No  | NA    | 1  | 0  | Low-quality    | Genome-fragment | NA | 5.12  | 0    |
| S5-final-viral-combined_k141_5798    | [full]   | 1788  | No  | NA    | 0  | 1  | Not-determined | Genome-fragment | NA |       | 0    |
| S5-final-viral-combined_k141_84255   | [full]   | 4305  | No  | NA    | 0  | 2  | Not-determined | Genome-fragment | NA |       | 0    |
| S2_k141_171449                       |          | 1664  | No  | NA    | 1  | 0  | Low-quality    | Genome-fragment | NA | 3.17  | 0    |
| S4-final-viral-combined_k141_47987   | [full]   | 1664  | No  | NA    | 0  | 1  | Low-quality    | Genome-fragment | NA | 1.19  | 0    |
| S5-final-viral-combined_k141_18228   | [full]   | 1726  | No  | NA    | 0  | 1  | Not-determined | Genome-fragment | NA |       | 0    |
| S5-final-viral-combined_k141_58131   | [full]   | 2867  | No  | NA    | 0  | 2  | Not-determined | Genome-fragment | NA |       | 0    |
| S5-final-viral-combined_k141_5845    | [full]   | 5108  | No  | NA    | 0  | 3  | Not-determined | Genome-fragment | NA |       | 0    |
| S5-final-viral-combined_k141_147044  | [full]   | 1138  | No  | NA    | 0  | 1  | Not-determined | Genome-fragment | NA |       | 0    |
| S5-final-viral-combined_k141_39714   | [full]   | 5000  | No  | NA    | 0  | 0  | Not-determined | Genome-fragment | NA |       | 0    |
| S8_k141_30141                        |          | 1664  | No  | NA    | 0  | 0  | Low-quality    | Genome-fragment | NA | 2.76  | 0    |
| S1-final-viral-combined_k141_132719  | [full]   | 1665  | No  | NA    | 1  | 0  | Low-quality    | Genome-fragment | NA | 3.72  | 0    |
| S17-final-viral-combined_k141_23867  | [full]   | 1665  | No  | NA    | 0  | 2  | Low-quality    | Genome-fragment | NA | 3.58  | 0    |
| S5-final-viral-combined_k141_147106  | [full]   | 1333  | No  | NA    | 0  | 2  | Not-determined | Genome-fragment | NA |       | 0    |
| S17-final-viral-combined_k141_31777  | [full]   | 1665  | No  | NA    | 2  | 0  | Low-quality    | Genome-fragment | NA | 2.94  | 0    |
| S5-final-viral-combined_k141_39767   | [full]   | 2200  | No  | NA    | 0  | 0  | Not-determined | Genome-fragment | NA |       | 0    |
| S5-final-viral-combined_k141_1914241 | [full]   | 1814  | No  | NA    | 0  | 1  | Not-determined | Genome-fragment | NA |       | 0    |
| S5-final-viral-combined_k141_147142  | [full]   | 2203  | No  | NA    | 0  | 0  | Not-determined | Genome-fragment | NA |       | 0    |
| S17_k141_188882                      |          | 1665  | No  | NA    | 0  | 2  | Low-quality    | Genome-fragment | NA | 1.99  | 0    |
| S5-final-viral-combined_k141_111052  | [full]   | 1875  | No  | NA    | 0  | 1  | Not-determined | Genome-fragment | NA |       | 0    |
| S5-final-viral-combined_k141_84402   | [full]   | 2207  | No  | NA    | 0  | 2  | Not-determined | Genome-fragment | NA |       | 0    |
| S4_k141_121278                       |          | 1665  | No  | NA    | 0  | 0  | Low-quality    | Genome-fragment | NA | 11.65 | 0    |
| S5-final-viral-combined_k141_111070  | [full]   | 2019  | No  | NA    | 0  | 2  | Not-determined | Genome-fragment | NA |       | 0    |
| S8-final-viral-combined_k141_129719  | [full]   | 1665  | No  | NA    | 0  | 0  | Low-quality    | Genome-fragment | NA | 5.14  | 0    |
| S5-final-viral-combined_k141_66662   | [full]   | 98874 | Yes | 43806 | 16 | 44 | High-quality   | High-quality    | NA | 100   | 55.7 |
| S11-final-viral-combined_k141_290355 | [full]   | 1666  | No  | NA    | 2  | 0  | Low-quality    | Genome-fragment | NA | 2.78  | 0    |
| S5-final-viral-combined_k141_147241  | [full]   | 1769  | No  | NA    | 0  | 2  | Not-determined | Genome-fragment | NA |       | 0    |
| S1-final-viral-combined_k141_213471  | [full]   | 1666  | No  | NA    | 1  | 0  | Low-quality    | Genome-fragment | NA | 4.29  | 0    |
| S1-final-viral-combined_k141_100701  | [full]   | 1666  | No  | NA    | 0  | 1  | Low-quality    | Genome-fragment | NA | 3.91  | 0    |
| S5-final-viral-combined_k141_147252  | [full]   | 1310  | No  | NA    | 0  | 0  | Not-determined | Genome-fragment | NA |       | 0    |
| S1-final-viral-combined_k141_7045    | [full]   | 1666  | No  | NA    | 0  | 0  | Low-quality    | Genome-fragment | NA | 3.37  | 0    |
| S7-final-viral-combined_k141_229998  | [full]   | 1666  | No  | NA    | 1  | 0  | Low-quality    | Genome-fragment | NA | 0.13  | 0    |
| S5-final-viral-combined_k141_39779   | [full]   | 1702  | No  | NA    | 0  | 1  | Not-determined | Genome-fragment | NA |       | 0    |
| S5-final-viral-combined_k141_102923  | [full]   | 2169  | No  | NA    | 0  | 0  | Not-determined | Genome-fragment | NA |       | 0    |
| S5-final-viral-combined_k141_66714   | [full]   | 1327  | No  | NA    | 0  | 2  | Not-determined | Genome-fragment | NA |       | 0    |
| S7_k141_216631                       |          | 1666  | No  | NA    | 1  | 0  | Low-quality    | Genome-fragment | NA | 3.58  | 0    |
| S17-final-viral-combined_k141_25260  | [full]   | 1666  | No  | NA    | 0  | 1  | Low-quality    | Genome-fragment | NA | 2.37  | 0    |
| S5-final-viral-combined_k141_93599   | [full]   | 1051  | No  | NA    | 0  | 0  | Not-determined | Genome-fragment | NA |       | 0    |
| S5-final-viral-combined_k141_66727   | [full]   | 2817  | No  | NA    | 0  | 1  | Not-determined | Genome-fragment | NA |       | 0    |
| S17_k141_44159                       |          | 1666  | No  | NA    | 1  | 0  | Low-quality    | Genome-fragment | NA | 3.77  | 0    |
| S12_k141_125442                      |          | 1666  | No  | NA    | 0  | 1  | Low-quality    | Genome-fragment | NA | 0.62  | 0    |
| S2-final-viral-combined_k141_176415  | [full]   | 1666  | No  | NA    | 0  | 1  | Low-quality    | Genome-fragment | NA | 4.26  | 0    |
| S5-final-viral-combined_k141_84525   | [full]   | 1294  | No  | NA    | 0  | 0  | Not-determined | Genome-fragment | NA |       | 0    |
| S5-final-viral-combined_k141_147370  | [full]   | 1592  | No  | NA    | 0  | 1  | Not-determined | Genome-fragment | NA |       | 0    |
| S2-final-viral-combined_k141_130215  | [full]   | 1666  | No  | NA    | 0  | 2  | Low-quality    | Genome-fragment | NA | 1.22  | 0    |
| S5-final-viral-combined_k141_147378  | [full]   | 1183  | No  | NA    | 0  | 1  | Not-determined | Genome-fragment | NA |       | 0    |
| S5-final-viral-combined_k141_137451  | [full]   | 3881  | No  | NA    | 0  | 0  | Not-determined | Genome-fragment | NA |       | 0    |
| S5-final-viral-combined_k141_119948  | [full]   | 1963  | No  | NA    | 0  | 0  | Not-determined | Genome-fragment | NA |       | 0    |
| S5-final-viral-combined_k141_119961  | [full]   | 2033  | No  | NA    | 0  | 0  | Not-determined | Genome-fragment | NA |       | 0    |
| S8-final-viral-combined_k141_216670  | [full]   | 1666  | No  | NA    | 0  | 1  | Low-quality    | Genome-fragment | NA | 4.03  | 0    |
| S5-final-viral-combined_k141_30578   | [full]   | 1050  | No  | NA    | 0  | 1  | Not-determined | Genome-fragment | NA |       | 0    |
| S5-final-viral-combined_k141_98835   | [full]   | 1109  | No  | NA    | 0  | 0  | Not-determined | Genome-fragment | NA |       | 0    |
| S1_k141_27042                        |          | 1667  | No  | NA    | 0  | 0  | Low-quality    | Genome-fragment | NA | 0.99  | 0    |
| S7-final-viral-combined_k141_75201   | [full]   | 1667  | No  | NA    | 0  | 1  | Low-quality    | Genome-fragment | NA | 4.02  | 0    |
| S7_k141_74296                        |          | 1667  | No  | NA    | 0  | 1  | Low-quality    | Genome-fragment | NA | 0.8   | 0    |
| S5-final-viral-combined_k141_39734   | [full]   | 1549  | No  | NA    | 0  | 1  | Not-determined | Genome-fragment | NA |       | 0    |
| S5-final-viral-combined_k141_84609   | [full]   | 4321  | No  | NA    | 0  | 2  | Not-determined | Genome-fragment | NA |       | 0    |
| S7_k141_232133                       |          | 1667  | No  | NA    | 0  | 0  | Low-quality    | Genome-fragment | NA | 1.76  | 0    |
| S5-final-viral-combined_k141_21370   | [full]   | 2402  | No  | NA    | 0  | 0  | Not-determined | Genome-fragment | NA |       | 0    |
| S5-final-viral-combined_k141_125851  | [full]   | 2111  | No  | NA    | 0  | 1  | Not-determined | Genome-fragment | NA |       | 0    |
| S5-final-viral-combined_k141_209423  | [full]   | 1346  | No  | NA    | 0  | 2  | Not-determined | Genome-fragment | NA |       | 0    |
| S17_k141_157245                      |          | 1667  | No  | NA    | 0  | 0  | Low-quality    | Genome-fragment | NA | 3.1   | 0    |
| S5-final-viral-combined_k141_103051  | [full]   | 2018  | No  | NA    | 0  | 1  | Not-determined | Genome-fragment | NA |       | 0    |
| S12-final-v                          |          |       |     |       |    |    |                |                 |    |       |      |



|                                      |          |       |     |     |   |    |                |                 |    |      |
|--------------------------------------|----------|-------|-----|-----|---|----|----------------|-----------------|----|------|
| S5-final-viral-combined_k141_1201161 | [full]   | 1326  | No  | NA  | 0 | 1  | Not-determined | Genome-fragment | NA | 0    |
| S5-final-viral-combined_k141_400975  | [full]   | 1673  | No  | NA  | 0 | 1  | Not-determined | Genome-fragment | NA | 0    |
| S5-final-viral-combined_k141_1918231 | [full]   | 1980  | No  | NA  | 0 | 1  | Not-determined | Genome-fragment | NA | 0    |
| S5-final-viral-combined_k141_401141  | [full]   | 8453  | No  | NA  | 0 | 3  | Not-determined | Genome-fragment | NA | 0    |
| S5-final-viral-combined_k141_111648  | [full]   | 42976 | No  | NA  | 0 | 24 | Not-determined | Genome-fragment | NA | 0    |
| S5-final-viral-combined_k141_103228  | [full]   | 2910  | No  | NA  | 0 | 0  | Not-determined | Genome-fragment | NA | 0    |
| S5-final-viral-combined_k141_182955  | [full]   | 1408  | No  | NA  | 0 | 0  | Not-determined | Genome-fragment | NA | 0    |
| S5-final-viral-combined_k141_119251  | [full]   | 3164  | No  | NA  | 0 | 1  | Not-determined | Genome-fragment | NA | 0    |
| S3-final-viral-combined_k141_1100351 | [full]   | 1669  | No  | NA  | 0 | 2  | Low-quality    | Genome-fragment | NA | 0.57 |
| S5-final-viral-combined_k141_30809   | [full]   | 1340  | No  | NA  | 0 | 1  | Not-determined | Genome-fragment | NA | 0    |
| S17-final-viral-combined_k141_22650  | [full]   | 1669  | No  | NA  | 0 | 1  | Low-quality    | Genome-fragment | NA | 1.14 |
| S5-final-viral-combined_k141_151616  | [full]   | 2351  | No  | NA  | 0 | 2  | Not-determined | Genome-fragment | NA | 0    |
| S5-final-viral-combined_k141_84946   | [full]   | 1324  | No  | NA  | 0 | 1  | Not-determined | Genome-fragment | NA | 0    |
| S17-k141_67953                       |          | 1669  | No  | NA  | 0 | 0  | Low-quality    | Genome-fragment | NA | 0.42 |
| S12-final-viral-combined_k141_226592 | [full]   | 1669  | No  | NA  | 2 | 0  | Low-quality    | Genome-fragment | NA | 4.13 |
| S2-final-viral-combined_k141_146262  | [full]   | 1669  | No  | NA  | 0 | 0  | Not-determined | Genome-fragment | NA | 3.85 |
| S5-final-viral-combined_k141_200682  | [full]   | 2468  | No  | NA  | 0 | 3  | Not-determined | Genome-fragment | NA | 0    |
| S5-final-viral-combined_k141_21614   | [full]   | 2622  | No  | NA  | 0 | 1  | Not-determined | Genome-fragment | NA | 0    |
| S4-final-viral-combined_k141_20002   | [full]   | 1669  | No  | NA  | 0 | 0  | Low-quality    | Genome-fragment | NA | 4.46 |
| S6-final-viral-combined_k141_13726   | [full]   | 1669  | No  | NA  | 1 | 0  | Low-quality    | Genome-fragment | NA | 3.06 |
| S5-final-viral-combined_k141_120226  | [full]   | 1582  | No  | NA  | 0 | 0  | Not-determined | Genome-fragment | NA | 0    |
| S9-final-viral-combined_k141_55955   | [full]   | 1670  | No  | NA  | 0 | 0  | Low-quality    | Genome-fragment | NA | 2.21 |
| S11-final-viral-combined_k141_220599 | [full]   | 1670  | No  | NA  | 1 | 0  | Low-quality    | Genome-fragment | NA | 3.39 |
| S5-final-viral-combined_k141_174637  | [full]   | 1111  | No  | NA  | 0 | 0  | Not-determined | Genome-fragment | NA | 0    |
| S5-final-viral-combined_k141_174638  | [full]   | 3066  | No  | NA  | 0 | 3  | Not-determined | Genome-fragment | NA | 0    |
| S1-final-viral-combined_k141_314636  | [full]   | 1670  | No  | NA  | 0 | 0  | Low-quality    | Genome-fragment | NA | 3.83 |
| S5-final-viral-combined_k141_76462   | [full]   | 1338  | No  | NA  | 0 | 0  | Not-determined | Genome-fragment | NA | 0    |
| S2_k141_110706                       |          | 1670  | No  | NA  | 0 | 1  | Low-quality    | Genome-fragment | NA | 2.76 |
| S5-final-viral-combined_k141_40287   | [full]   | 1176  | No  | NA  | 0 | 0  | Not-determined | Genome-fragment | NA | 0    |
| S5-final-viral-combined_k141_200166  | [H2gene] | 1670  | No  | NA  | 2 | 0  | Low-quality    | Genome-fragment | NA | 3.76 |
| S5-final-viral-combined_k141_120260  | [full]   | 1943  | No  | NA  | 0 | 1  | Not-determined | Genome-fragment | NA | 0    |
| S7-final-viral-combined_k141_23251   | [full]   | 1670  | No  | NA  | 0 | 0  | Low-quality    | Genome-fragment | NA | 1.95 |
| S5-final-viral-combined_k141_30994   | [full]   | 2420  | No  | NA  | 0 | 2  | Not-determined | Genome-fragment | NA | 0    |
| S17-final-viral-combined_k141_73896  | [full]   | 1670  | No  | NA  | 0 | 0  | Low-quality    | Genome-fragment | NA | 3.86 |
| S5-final-viral-combined_k141_120299  | [full]   | 1087  | No  | NA  | 0 | 0  | Not-determined | Genome-fragment | NA | 0    |
| S5-final-viral-combined_k141_49360   | [full]   | 1097  | No  | NA  | 0 | 2  | Not-determined | Genome-fragment | NA | 0    |
| S2-final-viral-combined_k141_112333  | [full]   | 1670  | Yes | 901 | 1 | 1  | Low-quality    | Genome-fragment | NA | 1.59 |
| S9-final-viral-combined_k141_23041   | [full]   | 1671  | No  | NA  | 0 | 0  | Low-quality    | Genome-fragment | NA | 2.88 |
| S9-final-viral-combined_k141_88043   | [H2gene] | 1671  | No  | NA  | 0 | 0  | Low-quality    | Genome-fragment | NA | 3.8  |
| S1-final-viral-combined_k141_347718  | [full]   | 1671  | No  | NA  | 0 | 0  | Low-quality    | Genome-fragment | NA | 2.9  |
| S5-final-viral-combined_k141_49399   | [full]   | 2011  | No  | NA  | 0 | 3  | Not-determined | Genome-fragment | NA | 0    |
| S1-final-viral-combined_k141_21352   | [full]   | 1671  | No  | NA  | 0 | 1  | Low-quality    | Genome-fragment | NA | 0.48 |
| S5-final-viral-combined_k141_22856   | [full]   | 1671  | No  | NA  | 0 | 2  | Low-quality    | Genome-fragment | NA | 2.71 |
| S7_k141_118497                       |          | 1671  | No  | NA  | 0 | 0  | Low-quality    | Genome-fragment | NA | 3.65 |
| S5-final-viral-combined_k141_31087   | [full]   | 3438  | No  | NA  | 0 | 2  | Not-determined | Genome-fragment | NA | 0    |
| S12_k141_307482                      |          | 1671  | No  | NA  | 0 | 0  | Low-quality    | Genome-fragment | NA | 3.03 |
| S5-final-viral-combined_k141_76524   | [full]   | 2275  | No  | NA  | 0 | 0  | Not-determined | Genome-fragment | NA | 0    |
| S2-final-viral-combined_k141_206229  | [full]   | 1671  | No  | NA  | 2 | 0  | Low-quality    | Genome-fragment | NA | 4.14 |
| S5-final-viral-combined_k141_111877  | [full]   | 3363  | No  | NA  | 0 | 3  | Not-determined | Genome-fragment | NA | 0    |
| S5-final-viral-combined_k141_8302    | [full]   | 9341  | No  | NA  | 0 | 6  | Not-determined | Genome-fragment | NA | 0    |
| S5-final-viral-combined_k141_49422   | [full]   | 2615  | No  | NA  | 0 | 1  | Not-determined | Genome-fragment | NA | 0    |
| S5-final-viral-combined_k141_183145  | [full]   | 584   | No  | NA  | 0 | 0  | Low-quality    | Genome-fragment | NA | 0    |
| S4_k141_20006                        |          | 1671  | No  | NA  | 2 | 0  | Low-quality    | Genome-fragment | NA | 4.7  |
| S5-final-viral-combined_k141_66924   | [full]   | 6645  | No  | NA  | 0 | 6  | Not-determined | Genome-fragment | NA | 0    |
| S6_k141_67093                        |          | 1671  | No  | NA  | 1 | 0  | Low-quality    | Genome-fragment | NA | 2.9  |
| S5-final-viral-combined_k141_14078   | [full]   | 5086  | No  | NA  | 0 | 4  | Not-determined | Genome-fragment | NA | 0    |
| S9-final-viral-combined_k141_116102  | [full]   | 1672  | No  | NA  | 1 | 0  | Low-quality    | Genome-fragment | NA | 4.15 |
| S3-final-viral-combined_k141_99903   | [full]   | 1672  | No  | NA  | 0 | 0  | Low-quality    | Genome-fragment | NA | 1.24 |
| S3-final-viral-combined_k141_34507   | [full]   | 1672  | No  | NA  | 1 | 0  | Low-quality    | Genome-fragment | NA | 3.06 |
| S5-final-viral-combined_k141_14106   | [full]   | 1482  | No  | NA  | 0 | 1  | Not-determined | Genome-fragment | NA | 0    |
| S12-final-viral-combined_k141_41219  | [full]   | 1672  | No  | NA  | 0 | 0  | Low-quality    | Genome-fragment | NA | 3.71 |
| S5-final-viral-combined_k141_12983   | [full]   | 354   | No  | NA  | 0 | 4  | Not-determined | Genome-fragment | NA | 0    |
| S6-final-viral-combined_k141_28020   | [full]   | 1672  | Yes | 937 | 1 | 1  | Low-quality    | Genome-fragment | NA | 2.35 |
| S5-final-viral-combined_k141_165051  | [full]   | 2013  | No  | NA  | 0 | 4  | Not-determined | Genome-fragment | NA | 0    |
| S5-final-viral-combined_k141_150262  | [full]   | 1470  | No  | NA  | 0 | 2  | Not-determined | Genome-fragment | NA | 0    |
| S5-final-viral-combined_k141_14151   | [full]   | 1987  | No  | NA  | 0 | 2  | Not-determined | Genome-fragment | NA | 0    |
| S9-final-viral-combined_k141_60615   | [H2gene] | 1673  | No  | NA  | 2 | 0  | Low-quality    | Genome-fragment | NA | 4.1  |
| S11-final-viral-combined_k141_235270 | [full]   | 1673  | No  | NA  | 0 | 0  | Low-quality    | Genome-fragment | NA | 2.56 |
| S1-final-viral-combined_k141_291193  | [full]   | 1673  | No  | NA  | 0 | 1  | Low-quality    | Genome-fragment | NA | 1.39 |
| S8_k141_65529                        |          | 1673  | No  | NA  | 0 | 0  | Low-quality    | Genome-fragment | NA | 2.71 |
| S5-final-viral-combined_k141_209874  | [full]   | 1101  | No  | NA  | 0 | 1  | Not-determined | Genome-fragment | NA | 0.92 |
| S1_k141_390875                       |          | 1674  | No  | NA  | 0 | 1  | Low-quality    | Genome-fragment | NA | 1.72 |
| S3-final-viral-combined_k141_126808  | [full]   | 1674  | No  | NA  | 0 | 0  | Low-quality    | Genome-fragment | NA | 4.89 |
| S5-final-viral-combined_k141_121780  | [full]   | 1674  | No  | NA  | 0 | 0  | Not-determined | Genome-fragment | NA | 0    |
| S5-final-viral-combined_k141_165139  | [full]   | 6363  | No  | NA  | 0 | 0  | Low-quality    | Genome-fragment | NA | 2.27 |
| S7-final-viral-combined_k141_199661  | [full]   | 1674  | No  | NA  | 0 | 1  | Not-determined | Genome-fragment | NA | 0    |
| S5-final-viral-combined_k141_209914  | [full]   | 1228  | No  | NA  | 0 | 0  | Low-quality    | Genome-fragment | NA | 0    |
| S5-final-viral-combined_k141_34849   | [full]   | 1053  | No  | NA  | 0 | 0  | Not-determined | Genome-fragment | NA | 0    |
| S5-final-viral-combined_k141_103384  | [full]   | 1147  | No  | NA  | 0 | 0  | Not-determined | Genome-fragment | NA | 0    |
| S12_k141_104400                      |          | 1674  | No  | NA  | 1 | 0  | Low-quality    | Genome-fragment | NA | 3.56 |
| S8-final-viral-combined_k141_130445  | [full]   | 1674  | No  | NA  | 1 | 0  | Low-quality    | Genome-fragment | NA | 0.89 |
| S1-final-viral-combined_k141_100303  | [full]   | 1675  | No  | NA  | 0 | 1  | Low-quality    | Genome-fragment | NA | 0.72 |
| S5-final-viral-combined_k141_6876    | [full]   | 1582  | No  | NA  | 0 | 2  | Not-determined | Genome-fragment | NA | 0    |
| S5-final-viral-combined_k141_49585   | [full]   | 5213  | No  | NA  | 0 | 4  | Not-determined | Genome-fragment | NA | 0    |
| S1-final-viral-combined_k141_222215  | [full]   | 1675  | No  | NA  | 0 | 2  | Low-quality    | Genome-fragment | NA | 3.14 |
| S3-final-viral-combined_k141_13790   | [H2gene] | 1675  | No  | NA  | 1 | 0  | Low-quality    | Genome-fragment | NA | 2.06 |
| S5-final-viral-combined_k141_49600   | [full]   | 1600  | No  | NA  | 0 | 3  | Not-determined | Genome-fragment | NA | 0    |
| S5-final-viral-combined_k141_100734  | [full]   | 1675  | No  | NA  | 0 | 0  | Low-quality    | Genome-fragment | NA | 3.29 |
| S7-final-viral-combined_k141_28860   | [full]   | 1675  | No  | NA  | 0 | 0  | Low-quality    | Genome-fragment | NA | 3.27 |
| S17-final-viral-combined_k141_122710 | [full]   | 1675  | No  | NA  | 0 | 0  | Low-quality    | Genome-fragment | NA | 1.54 |
| S12-final-viral-combined_k141_220708 | [full]   | 1675  | No  | NA  | 1 | 0  | Low-quality    | Genome-fragment | NA | 1.87 |
| S12_k141_280250                      |          | 1675  | No  | NA  | 0 | 0  | Low-quality    | Genome-fragment | NA | 0    |
| S5-final-viral-combined_k141_21981   | [full]   | 3296  | No  | NA  | 0 | 1  | Not-determined | Genome-fragment | NA | 0    |
| S2_k141_5175                         |          | 1675  | No  | NA  | 0 | 1  | Low-quality    | Genome-fragment | NA | 0.98 |
| S4-final-viral-combined_k141_22053   | [full]   | 1675  | No  | NA  | 1 | 0  | Low-quality    | Genome-fragment | NA | 2.54 |
| S5-final-viral-combined_k141_192128  | [full]   | 1796  | No  | NA  | 0 | 0  | Not-determined | Genome-fragment | NA | 0    |
| S6_k141_56419                        |          | 1675  | No  | NA  | 0 | 0  | Low-quality    | Genome-fragment | NA | 3.26 |
| S5-final-viral-combined_k141_31207   | [full]   | 2834  | No  | NA  | 0 | 2  | Not-determined | Genome-fragment | NA | 0    |
| S5-final-viral-combined_k141_156092  | [full]   | 2485  | No  | NA  | 0 | 1  | Not-determined | Genome-fragment | NA | 0    |
| S11_k141_59011                       |          | 1676  | No  | NA  | 0 | 0  | Low-quality    | Genome-fragment | NA | 1.8  |
| S5-final-viral-combined_k141_112080  | [full]   | 1146  | No  | NA  | 0 | 1  | Not-determined | Genome-fragment | NA | 0    |
| S1-final-viral-combined_k141_259075  | [full]   | 1676  | No  | NA  | 0 | 1  | Low-quality    | Genome-fragment | NA | 2.08 |
| S5-final-viral-combined_k141_29860   | [full]   | 1204  | No  | NA  | 0 | 2  | Not-determined | Genome-fragment | NA | 0    |
| S17-final-viral-combined_k141_82307  | [full]   | 1676  | No  | NA  | 1 | 0  | Low-quality    | Genome-fragment | NA | 1.97 |
| S5-final-viral-combined_k141_386548  | [full]   | 2299  | No  | NA  | 0 | 3  | Not-determined | Genome-fragment | NA | 0    |
| S17-final-viral-combined_k141_153649 | [full]   | 1676  | Yes | 369 | 1 | 2  | Low-quality    | Genome-fragment | NA | 0.72 |
| S2-final-viral-combined_k141_189938  | [full]   | 1676  | No  | NA  | 1 | 0  | Low-quality    | Genome-fragment | NA | 3.23 |
| S4-final-viral-combined_k141_29970   | [full]   | 1676  | No  | NA  | 1 | 0  | Low-quality    | Genome-fragment | NA | 4.68 |
| S5-final-viral-combined_k141_129973  | [full]   | 1994  | No  | NA  | 0 | 2  | Not-determined | Genome-fragment | NA | 0    |
| S5-final-viral-combined_k141_40700   | [full]   | 1797  | No  | NA  | 0 | 2  | Not-determined | Genome-fragment | NA | 0    |
| S5-final-viral-combined_k141_120443  | [full]   | 2406  | No  | NA  | 0 | 2  | Not-determined | Genome-fragment | NA | 0    |
| S5-final-viral-combined_k141_165230  | [full]   | 1149  | No  | NA  | 0 | 1  | Not-determined | Genome-fragment | NA | 0    |
| S6-final-viral-combined_k141_89559   | [full]   | 1676  | No  | NA  | 1 | 0  | Low-quality    | Genome-fragment | NA | 4.91 |
| S5-final-viral-combined_k141_58686   | [full]   | 4133  | No  | NA  | 0 | 1  | Not-determined | Genome-fragment | NA | 0    |
| S5-final-viral-combined_k141_120016  | [full]   | 6623  | No  | NA  | 0 | 2  | Not-determined | Genome-fragment | NA | 0    |
| S11-final-viral-combined_k141_166736 | [full]   | 1677  | No  | NA  | 0 | 1  | Low-quality    | Genome-fragment | NA | 2.43 |
| S5-final-viral-combined_k141_31425   | [full]   | 17623 | No  | NA  | 0 | 14 | Not-determined | Genome-fragment | NA | 0    |
| S5-final-viral-combined_k141_138466  | [full]   | 3133  | No  | NA  | 0 | 3  | Not-determined | Genome-fragment | NA | 0    |
| S11-final-viral-combined_k141_338886 | [full]   | 1677  | No  | NA  | 0 | 0  | Low-quality    | Genome-fragment | NA | 3.7  |
| S11-final-viral-combined_k141_62692  | [full]   | 1677  | No  | NA  | 0 | 1  | Low-quality    | Genome-fragment | NA | 0.73 |
| S5-final-viral-combined_k141_138420  | [full]   | 2692  | No  | NA  | 0 | 1  | Not-determined | Genome-fragment | NA | 0    |
| S5-final-viral-combined_k141_183550  | [full]   | 6883  | No  | NA  | 0 | 1  | Not-determined | Genome-fragment | NA | 0    |
| S5-final-viral-combined_k141_40859   | [full]   | 1766  | No  | NA  | 0 | 0  | Not-determined | Genome-fragment | NA | 0    |
| S5-final-viral-combined_k141_4255    | [full]   | 1677  | No  | NA  | 0 | 2  | Low-quality    | Genome-fragment | NA | 2.45 |
| S5-final-viral-combined_k141_165286  | [full]   | 1154  | No  | NA  | 0 | 0  | Not-determined | Genome-fragment | NA | 0    |
| S5_k141_18793                        |          | 1677  | No  | NA  | 0 | 1  | Low-quality    | Genome-fragment | NA | 3.71 |
| S5-final-viral-combined_k141_174903  | [full]   | 2146  | No  | NA  | 0 | 2  | Not-determined | Genome-fragment | NA | 0    |
| S7-final-viral-combined_k141_114689  | [H2gene] | 1677  | No  | NA  | 0 | 0  | Low-quality    | Genome-fragment | NA | 3.82 |
| S5-final-viral-combined_k141_94213   | [full]   | 2392  | No  | NA  | 0 | 0  | Not-determined | Genome-fragment | NA | 0    |
| S5-final-viral-combined_k141_183626  | [full]   | 1546  | No  | NA  | 0 | 1  | Not-determined | Genome-fragment | NA | 0    |
| S5-final-viral-combined_k141_13844   |          |       |     |     |   |    |                |                 |    |      |



|                                        |          |        |      |       |       |    |                |                 |                 |       |       |
|----------------------------------------|----------|--------|------|-------|-------|----|----------------|-----------------|-----------------|-------|-------|
| S5-final-viral-combined_k141_22328]]   | [full]   | 7049   | No   | NA    | 0     | 2  | Not-determined | Genome-fragment | NA              | 0     | 0     |
| S5-final-viral-combined_k141_130361]]  | [full]   | 2838   | No   | NA    | 0     | 1  | Not-determined | Genome-fragment | NA              | 4.3   | 0     |
| S17-final-viral-combined_k141_24181]]  | [full]   | 1679   | No   | NA    | 0     | 1  | Low-quality    | Genome-fragment | NA              | 2.22  | 0     |
| S12-final-viral-combined_k141_169185]] | [full]   | 1679   | No   | NA    | 1     | 0  | Low-quality    | Genome-fragment | NA              | 2.53  | 0     |
| S5-final-viral-combined_k141_22342]]   | [full]   | 3189   | No   | NA    | 0     | 0  | Not-determined | Genome-fragment | NA              | 0     | 0     |
| S12-final-viral-combined_k141_190900]] | [full]   | 1679   | No   | NA    | 1     | 0  | Low-quality    | Genome-fragment | NA              | 3.86  | 0     |
| S12-final-viral-combined_k141_183173]] | [full]   | 1679   | No   | NA    | 0     | 2  | Low-quality    | Genome-fragment | NA              | 0.9   | 0     |
| S12_k141_112172                        |          | 1679   | No   | NA    | 0     | 1  | Low-quality    | Genome-fragment | NA              | 1.68  | 0     |
| S5-final-viral-combined_k141_183734]]  | [full]   | 2354   | No   | NA    | 0     | 0  | Not-determined | Genome-fragment | NA              | 0     | 0     |
| S5-final-viral-combined_k141_156316]]  | [full]   | 3597   | No   | NA    | 0     | 0  | Not-determined | Genome-fragment | NA              | 0     | 0     |
| S2-final-viral-combined_k141_11099]]   | [full]   | 1679   | No   | NA    | 0     | 0  | Low-quality    | Genome-fragment | NA              | 3.94  | 0     |
| S2-final-viral-combined_k141_15852]]   | [full]   | 1679   | No   | NA    | 0     | 0  | Low-quality    | Genome-fragment | NA              | 4.8   | 0     |
| S5-final-viral-combined_k141_147993]]  | [full]   | 18083  | No   | NA    | 15    | 0  | Medium-quality | Genome-fragment | NA              | 51.07 | 0     |
| S2-final-viral-combined_k141_180175]]  | [full]   | 1679   | No   | NA    | 0     | 1  | Low-quality    | Genome-fragment | NA              | 1.32  | 0     |
| S2-final-viral-combined_k141_171091]]  | [full]   | 1679   | No   | NA    | 0     | 0  | Low-quality    | Genome-fragment | NA              | 3.27  | 0     |
| S5-final-viral-combined_k141_156329]]  | [full]   | 22689  | No   | NA    | 16    | 0  | Medium-quality | Genome-fragment | NA              | 59.01 | 0     |
| S2-final-viral-combined_k141_17532]]   | [full]   | 1679   | No   | NA    | 2     | 0  | Low-quality    | Genome-fragment | NA              | 3.56  | 0     |
| S5-final-viral-combined_k141_7292]]    | [full]   | 14771  | No   | NA    | 13    | 0  | Medium-quality | Genome-fragment | NA              | 60.47 | 0     |
| S2-final-viral-combined_k141_126473]]  | [full]   | 1679   | No   | NA    | 0     | 2  | Low-quality    | Genome-fragment | NA              | 0.51  | 0     |
| S5-final-viral-combined_k141_67348]]   | [full]   | 2021   | No   | NA    | 0     | 2  | Not-determined | Genome-fragment | NA              | 4.4   | 0     |
| S4_k141_22396                          |          | 1679   | No   | NA    | 0     | 0  | Low-quality    | Genome-fragment | NA              | 0.7   | 0     |
| S5-final-viral-combined_k141_201561]]  | [full]   | 2598   | No   | NA    | 0     | 1  | Not-determined | Genome-fragment | NA              | 0.4   | 0     |
| S8-final-viral-combined_k141_254486]]  | [full]   | 1679   | No   | NA    | 0     | 1  | Low-quality    | Genome-fragment | NA              | 3     | 0     |
| S5-final-viral-combined_k141_183794]]  | [full]   | 2662   | No   | NA    | 0     | 0  | Not-determined | Genome-fragment | NA              | 0     | 0     |
| S5-final-viral-combined_k141_22407]]   | [full]   | 1598   | No   | NA    | 0     | 2  | Not-determined | Genome-fragment | NA              | 2.4   | 0     |
| S5-final-viral-combined_k141_22408]]   | [full]   | 2287   | No   | NA    | 0     | 0  | Not-determined | Genome-fragment | NA              | 0     | 0     |
| S8-final-viral-combined_k141_248477]]  | [full]   | 1679   | No   | NA    | 0     | 0  | Low-quality    | Genome-fragment | NA              | 3.54  | 0     |
| S5-final-viral-combined_k141_59064]]   | [full]   | 117646 | Yes  | NA    | 31029 | 7  | 52             | Medium-quality  | Genome-fragment | 72.45 | 73.63 |
| S9-final-viral-combined_k141_497714]]  | [full]   | 1680   | No   | NA    | 2     | 0  | Low-quality    | Genome-fragment | NA              | 0     | 0     |
| S1-final-viral-combined_k141_184157]]  | [full]   | 1680   | No   | NA    | 0     | 0  | Low-quality    | Genome-fragment | NA              | 3.54  | 0     |
| S1-final-viral-combined_k141_285988]]  | [full]   | 1680   | No   | NA    | 0     | 0  | Low-quality    | Genome-fragment | NA              | 1.01  | 0     |
| S1-final-viral-combined_k141_203331]]  | [full]   | 1680   | Yes  | 773   | 1     | 0  | Low-quality    | Genome-fragment | NA              | 0.42  | 53.99 |
| S1-final-viral-combined_k141_310860]]  | [full]   | 1680   | No   | NA    | 0     | 0  | Low-quality    | Genome-fragment | NA              | 2.67  | 0     |
| S5-final-viral-combined_k141_31738]]   | [full]   | 1459   | No   | NA    | 0     | 0  | Not-determined | Genome-fragment | NA              | 0     | 0     |
| S3-final-viral-combined_k141_112807]]  | [full]   | 1680   | No   | NA    | 1     | 0  | Low-quality    | Genome-fragment | NA              | 4.32  | 0     |
| S3-final-viral-combined_k141_60846]]   | [H2gene] | 1680   | No   | NA    | 0     | 1  | Low-quality    | Genome-fragment | NA              | 4.75  | 0     |
| S5-final-viral-combined_k141_7375]]    | [full]   | 1080   | No   | NA    | 0     | 2  | Not-determined | Genome-fragment | NA              | 0     | 0     |
| S17-final-viral-combined_k141_82688]]  | [full]   | 1680   | No   | NA    | 0     | 0  | Low-quality    | Genome-fragment | NA              | 3.53  | 0     |
| S12-final-viral-combined_k141_292685]] | [full]   | 1680   | No   | NA    | 0     | 1  | Low-quality    | Genome-fragment | NA              | 0.77  | 0     |
| S5-final-viral-combined_k141_59092]]   | [full]   | 7061   | No   | NA    | 0     | 5  | Not-determined | Genome-fragment | NA              | 0.77  | 0     |
| S2-final-viral-combined_k141_13779]]   | [full]   | 1680   | No   | NA    | 0     | 0  | Low-quality    | Genome-fragment | NA              | 3.82  | 0     |
| S8_k141_227007                         |          | 1680   | No   | NA    | 1     | 0  | Low-quality    | Genome-fragment | NA              | 1.33  | 0     |
| S5-final-viral-combined_k141_77000]]   | [full]   | 3105   | No   | NA    | 0     | 1  | Not-determined | Genome-fragment | NA              | 0     | 0     |
| S5-final-viral-combined_k141_148170]]  | [full]   | 3258   | No   | NA    | 0     | 0  | Not-determined | Genome-fragment | NA              | 0     | 0     |
| S5-final-viral-combined_k141_183888]]  | [full]   | 4410   | No   | NA    | 0     | 2  | Not-determined | Genome-fragment | NA              | 0     | 0     |
| S9-final-viral-combined_k141_50302]]   | [full]   | 1681   | No   | NA    | 0     | 0  | Low-quality    | Genome-fragment | NA              | 0.95  | 0     |
| S1-final-viral-combined_k141_266237]]  | [full]   | 1681   | No   | NA    | 0     | 0  | Low-quality    | Genome-fragment | NA              | 4.36  | 0     |
| S3-final-viral-combined_k141_53462]]   | [full]   | 1681   | No   | NA    | 1     | 0  | Low-quality    | Genome-fragment | NA              | 3.13  | 0     |
| S5-final-viral-combined_k141_50042]]   | [full]   | 1242   | No   | NA    | 0     | 0  | Not-determined | Genome-fragment | NA              | 0     | 0     |
| S5-final-viral-combined_k141_175145]]  | [full]   | 35234  | No   | NA    | 23    | 1  | High-quality   | Genome-fragment | NA              | 93.64 | 0     |
| S17-final-viral-combined_k141_160405]] | [full]   | 1681   | No   | NA    | 0     | 1  | Low-quality    | Genome-fragment | NA              | 1.93  | 0     |
| S17-final-viral-combined_k141_42350]]  | [full]   | 1681   | No   | NA    | 1     | 0  | Low-quality    | Genome-fragment | NA              | 2.44  | 0     |
| S12-final-viral-combined_k141_327586]] | [full]   | 1681   | No   | NA    | 0     | 0  | Low-quality    | Genome-fragment | NA              | 2.83  | 0     |
| S2-final-viral-combined_k141_241110]]  | [full]   | 1681   | No   | NA    | 2     | 0  | Low-quality    | Genome-fragment | NA              | 3.62  | 0     |
| S5-final-viral-combined_k141_183925]]  | [full]   | 4411   | No   | NA    | 0     | 2  | Not-determined | Genome-fragment | NA              | 2.87  | 0     |
| S4-final-viral-combined_k141_100777]]  | [full]   | 1681   | No   | NA    | 0     | 0  | Low-quality    | Genome-fragment | NA              | 0     | 0     |
| S5-final-viral-combined_k141_203116]]  | [full]   | 1625   | No   | NA    | 0     | 1  | Not-determined | Genome-fragment | NA              | 0     | 0     |
| S5-final-viral-combined_k141_136388]]  | [full]   | 2263   | No   | NA    | 0     | 0  | Not-determined | Genome-fragment | NA              | 0     | 0     |
| S5-final-viral-combined_k141_203131]]  | [full]   | 1822   | No   | NA    | 0     | 1  | Not-determined | Genome-fragment | NA              | 0     | 0     |
| S9-final-viral-combined_k141_104734]]  | [H2gene] | 1682   | No   | NA    | 1     | 0  | Low-quality    | Genome-fragment | NA              | 4.32  | 0     |
| S1-final-viral-combined_k141_283393]]  | [full]   | 1682   | No   | NA    | 0     | 1  | Low-quality    | Genome-fragment | NA              | 1.2   | 0     |
| S1-final-viral-combined_k141_30665]]   | [full]   | 1682   | No   | NA    | 0     | 0  | Low-quality    | Genome-fragment | NA              | 11.3  | 0     |
| S1-final-viral-combined_k141_241034]]  | [full]   | 1682   | No   | NA    | 2     | 0  | Low-quality    | Genome-fragment | NA              | 4.09  | 0     |
| S5-final-viral-combined_k141_31859]]   | [full]   | 6903   | No   | NA    | 0     | 1  | Not-determined | Genome-fragment | NA              | 0     | 0     |
| S5-final-viral-combined_k141_67496]]   | [full]   | 2207   | No   | NA    | 0     | 1  | Not-determined | Genome-fragment | NA              | 0     | 0     |
| S5-final-viral-combined_k141_31866]]   | [full]   | 1464   | No   | NA    | 0     | 0  | Not-determined | Genome-fragment | NA              | 0     | 0     |
| S5-final-viral-combined_k141_7484]]    | [full]   | 3737   | No   | NA    | 0     | 4  | Not-determined | Genome-fragment | NA              | 0     | 0     |
| S5-final-viral-combined_k141_156407]]  | [full]   | 1463   | No   | NA    | 0     | 0  | Not-determined | Genome-fragment | NA              | 0     | 0     |
| S5-final-viral-combined_k141_6752]]    | [full]   | 1157   | No   | NA    | 0     | 0  | Not-determined | Genome-fragment | NA              | 0     | 0     |
| S1_k141_129168                         |          | 1682   | No   | NA    | 0     | 1  | Low-quality    | Genome-fragment | NA              | 0.94  | 0     |
| S5-final-viral-combined_k141_156442]]  | [full]   | 1637   | No   | NA    | 0     | 2  | Not-determined | Genome-fragment | NA              | 0     | 0     |
| S5-final-viral-combined_k141_104054]]  | [full]   | 2955   | No   | NA    | 0     | 0  | Not-determined | Genome-fragment | NA              | 0     | 0     |
| S5-final-viral-combined_k141_121042]]  | [full]   | 2970   | No   | NA    | 0     | 2  | Not-determined | Genome-fragment | NA              | 0     | 0     |
| S5-final-viral-combined_k141_37383]]   | [H2gene] | 1682   | Yes  | 1297  | 1     | 1  | Low-quality    | Genome-fragment | NA              | 0.37  | 22.89 |
| S5-final-viral-combined_k141_175618]]  | [full]   | 1451   | No   | NA    | 0     | 0  | Not-determined | Genome-fragment | NA              | 0     | 0     |
| S5-final-viral-combined_k141_22504]]   | [full]   | 1575   | No   | NA    | 0     | 1  | Not-determined | Genome-fragment | NA              | 0     | 0     |
| S17-final-viral-combined_k141_131973]] | [full]   | 1682   | No   | NA    | 2     | 0  | Low-quality    | Genome-fragment | NA              | 2.77  | 0     |
| S17-final-viral-combined_k141_151500]] | [H2gene] | 1682   | No   | NA    | 0     | 0  | Low-quality    | Genome-fragment | NA              | 2.65  | 0     |
| S5-final-viral-combined_k141_34462]]   | [full]   | 5983   | Yes  | 51384 | 4     | 0  | High-quality   | Genome-fragment | NA              | 14.19 | 0     |
| S2-final-viral-combined_k141_67341]]   | [full]   | 1682   | No   | NA    | 2     | 0  | Low-quality    | Genome-fragment | NA              | 5.14  | 0     |
| S4_k141_132023                         |          | 1682   | No   | NA    | 0     | 0  | Low-quality    | Genome-fragment | NA              | 0.34  | 0     |
| S5-final-viral-combined_k141_183940]]  | [full]   | 1814   | No   | NA    | 0     | 0  | Not-determined | Genome-fragment | NA              | 0     | 0     |
| S8_k141_268731                         |          | 1682   | No   | NA    | 0     | 0  | Low-quality    | Genome-fragment | NA              | 1.76  | 0     |
| S5-final-viral-combined_k141_183888]]  | [full]   | 2464   | No   | NA    | 0     | 2  | Not-determined | Genome-fragment | NA              | 0     | 0     |
| S11-final-viral-combined_k141_84624]]  | [full]   | 1683   | No   | NA    | 0     | 0  | Low-quality    | Genome-fragment | NA              | 1.19  | 0     |
| S5-final-viral-combined_k141_183973]]  | [full]   | 2437   | No   | NA    | 0     | 2  | Not-determined | Genome-fragment | NA              | 0     | 0     |
| S11-final-viral-combined_k141_103076]] | [full]   | 1683   | No   | NA    | 0     | 0  | Low-quality    | Genome-fragment | NA              | 2.08  | 0     |
| S2-final-viral-combined_k141_378865]]  | [full]   | 1683   | No   | NA    | 0     | 0  | Low-quality    | Genome-fragment | NA              | 3.85  | 0     |
| S5-final-viral-combined_k141_85727]]   | [full]   | 2206   | No   | NA    | 0     | 0  | Not-determined | Genome-fragment | NA              | 0     | 0     |
| S1_k141_369256                         |          | 1683   | No   | NA    | 0     | 0  | Low-quality    | Genome-fragment | NA              | 2.81  | 0     |
| S5-final-viral-combined_k141_94495]]   | [full]   | 1016   | No   | NA    | 0     | 0  | Not-determined | Genome-fragment | NA              | 0     | 0     |
| S5-final-viral-combined_k141_112483]]  | [full]   | 1054   | No   | NA    | 0     | 0  | Not-determined | Genome-fragment | NA              | 0     | 0     |
| S5-final-viral-combined_k141_175391]]  | [full]   | 1959   | No   | NA    | 0     | 2  | Not-determined | Genome-fragment | NA              | 0     | 0     |
| S5-final-viral-combined_k141_32050]]   | [full]   | 2370   | No   | NA    | 0     | 1  | Not-determined | Genome-fragment | NA              | 0     | 0     |
| S5-final-viral-combined_k141_50204]]   | [full]   | 1020   | No   | NA    | 0     | 0  | Not-determined | Genome-fragment | NA              | 0     | 0     |
| S5-final-viral-combined_k141_41387]]   | [full]   | 11397  | No   | NA    | 0     | 7  | Not-determined | Genome-fragment | NA              | 0     | 0     |
| S5-final-viral-combined_k141_77233]]   | [full]   | 1254   | No   | NA    | 0     | 1  | Not-determined | Genome-fragment | NA              | 0     | 0     |
| S5-final-viral-combined_k141_87708]]   | [full]   | 1683   | No   | NA    | 1     | 0  | Low-quality    | Genome-fragment | NA              | 3.13  | 0     |
| S5-final-viral-combined_k141_7525]]    | [full]   | 3205   | No   | NA    | 0     | 1  | Not-determined | Genome-fragment | NA              | 0     | 0     |
| S5-final-viral-combined_k141_14663]]   | [full]   | 2087   | No   | NA    | 0     | 0  | Not-determined | Genome-fragment | NA              | 0     | 0     |
| S17-final-viral-combined_k141_141982]] | [full]   | 1683   | No   | NA    | 3     | 0  | Low-quality    | Genome-fragment | NA              | 4.27  | 0     |
| S17-final-viral-combined_k141_234163]] | [full]   | 1683   | No   | NA    | 0     | 0  | Low-quality    | Genome-fragment | NA              | 1.02  | 0     |
| S5-final-viral-combined_k141_184036]]  | [full]   | 2302   | No   | NA    | 0     | 3  | Not-determined | Genome-fragment | NA              | 0     | 0     |
| S5-final-viral-combined_k141_112539]]  | [full]   | 2702   | No   | NA    | 0     | 2  | Not-determined | Genome-fragment | NA              | 0     | 0     |
| S5-final-viral-combined_k141_165393]]  | [full]   | 1310   | No   | NA    | 0     | 0  | Not-determined | Genome-fragment | NA              | 0     | 0     |
| S12-final-viral-combined_k141_136219]] | [full]   | 1683   | No   | NA    | 0     | 0  | Low-quality    | Genome-fragment | NA              | 2.53  | 0     |
| S5-final-viral-combined_k141_175449]]  | [full]   | 3389   | No   | NA    | 0     | 2  | Not-determined | Genome-fragment | NA              | 0     | 0     |
| S5-final-viral-combined_k141_130782]]  | [full]   | 1308   | No   | NA    | 0     | 0  | Not-determined | Genome-fragment | NA              | 0     | 0     |
| S5-final-viral-combined_k141_112605]]  | [full]   | 1743   | No   | NA    | 0     | 0  | Not-determined | Genome-fragment | NA              | 0     | 0     |
| S9-final-viral-combined_k141_53399]]   | [H2gene] | 1684   | No   | NA    | 2     | 0  | Low-quality    | Genome-fragment | NA              | 4.21  | 0     |
| S5-final-viral-combined_k141_3699]]    | [full]   | 1684   | No   | NA    | 0     | 0  | Low-quality    | Genome-fragment | NA              | 2.13  | 0     |
| S3_k141_47154                          |          | 1684   | No   | NA    | 1     | 0  | Low-quality    | Genome-fragment | NA              | 0.78  | 0     |
| S5-final-viral-combined_k141_14717]]   | [full]   | 14124  | No   | NA    | 0     | 10 | Not-determined | Genome-fragment | NA              | 0     | 0     |
| S5-final-viral-combined_k141_148381]]  | [full]   | 4136   | No   | NA    | 0     | 0  | Not-determined | Genome-fragment | NA              | 0     | 0     |
| S5-final-viral-combined_k141_148385]]  | [full]   | 1619   | No   | NA    | 0     | 0  | Not-determined | Genome-fragment | NA              | 0     | 0     |
| S7-final-viral-combined_k141_237207]]  | [full]   | 1684   | Yes  | 1357  | 1     | 1  | Low-quality    | Genome-fragment | NA              | 2.47  | 19.42 |
| S7-final-viral-combined_k141_232575]]  | [full]   | 1684   | No   | NA    | 1     | 0  | Low-quality    | Genome-fragment | NA              | 4.04  | 0     |
| S17-k141_36168                         |          | 1684   | No   | NA    | 0     | 0  | Low-quality    | Genome-fragment | NA              | 2.58  | 0     |
| S5-final-viral-combined_k141_77383]]   | [full]   | 2143   | No   | NA    | 0     | 0  | Not-determined | Genome-fragment | NA              | 0     | 0     |
| S17-k141_182626                        |          | 1684   | No   | NA    | 1     | 0  | Low-quality    | Genome-fragment | NA              | 3.23  | 0     |
| S12-final-viral-combined_k141_4103]]   | [full]   | 1684   | No</ |       |       |    |                |                 |                 |       |       |



|                                       |          |        |     |       |    |    |                |                 |    |       |       |
|---------------------------------------|----------|--------|-----|-------|----|----|----------------|-----------------|----|-------|-------|
| S5-final-viral-combined_k141_232621   | [full]   | 1334   | No  | NA    | 0  | 0  | Not-determined | Genome-fragment | NA | 0     | 0     |
| S11_k141_143883                       |          | 1687   | No  | NA    | 0  | 0  | Low-quality    | Genome-fragment | NA | 2.03  | 0     |
| S5-final-viral-combined_k141_148761   | [full]   | 1838   | No  | NA    | 0  | 0  | Not-determined | Genome-fragment | NA | 0     | 0     |
| S5-final-viral-combined_k141_595461   | [full]   | 1691   | No  | NA    | 0  | 3  | Not-determined | Genome-fragment | NA | 0     | 0     |
| S1-final-viral-combined_k141_1636001  | [full]   | 1687   | No  | NA    | 0  | 2  | Low-quality    | Genome-fragment | NA | 1.81  | 0     |
| S5-final-viral-combined_k141_1235931  | [full]   | 1158   | No  | NA    | 0  | 0  | Not-determined | Genome-fragment | NA | 0     | 0     |
| S5-final-viral-combined_k141_861081   | [full]   | 1863   | No  | NA    | 0  | 0  | Not-determined | Genome-fragment | NA | 0     | 0     |
| S3-final-viral-combined_k141_1229191  | [full]   | 1687   | No  | NA    | 0  | 1  | Low-quality    | Genome-fragment | NA | 3.35  | 0     |
| S5-final-viral-combined_k141_1486801  | [full]   | 2712   | No  | NA    | 0  | 0  | Not-determined | Genome-fragment | NA | 0     | 0     |
| S5-final-viral-combined_k141_1845481  | [full]   | 1772   | No  | NA    | 0  | 1  | Not-determined | Genome-fragment | NA | 0     | 0     |
| S17-final-viral-combined_k141_1676921 | [full]   | 1687   | No  | NA    | 0  | 2  | Low-quality    | Genome-fragment | NA | 0.94  | 0     |
| S17-final-viral-combined_k141_534941  | [full]   | 1687   | No  | NA    | 0  | 0  | Not-determined | Genome-fragment | NA | 1.07  | 0     |
| S5-final-viral-combined_k141_947861   | [full]   | 72378  | Yes | 34416 | 14 | 25 | Medium-quality | Genome-fragment | NA | 55.06 | 52.45 |
| S12-final-viral-combined_k141_3756601 | [H2gene] | 1687   | No  | NA    | 0  | 0  | Low-quality    | Genome-fragment | NA | 5.88  | 0     |
| S5-final-viral-combined_k141_595551   | [full]   | 1662   | No  | NA    | 0  | 4  | Not-determined | Genome-fragment | NA | 0     | 0     |
| S5-final-viral-combined_k141_148741   | [full]   | 1406   | No  | NA    | 0  | 0  | Not-determined | Genome-fragment | NA | 0     | 0     |
| S5-final-viral-combined_k141_2106871  | [full]   | 2080   | No  | NA    | 0  | 0  | Not-determined | Genome-fragment | NA | 0     | 0     |
| S12-final-viral-combined_k141_2154071 | [H2gene] | 1687   | No  | NA    | 1  | 0  | Low-quality    | Genome-fragment | NA | 3.71  | 0     |
| S5-final-viral-combined_k141_1846081  | [full]   | 1416   | No  | NA    | 0  | 3  | Not-determined | Genome-fragment | NA | 0     | 0     |
| S5-final-viral-combined_k141_228391   | [full]   | 1436   | No  | NA    | 0  | 1  | Not-determined | Genome-fragment | NA | 0     | 0     |
| S2-final-viral-combined_k141_688801   | [full]   | 1687   | No  | NA    | 0  | 0  | Low-quality    | Genome-fragment | NA | 0.95  | 0     |
| S4-final-viral-combined_k141_255481   | [full]   | 1687   | No  | NA    | 0  | 0  | Low-quality    | Genome-fragment | NA | 1.58  | 0     |
| S4-final-viral-combined_k141_598021   | [full]   | 1687   | No  | NA    | 0  | 1  | Low-quality    | Genome-fragment | NA | 1.03  | 0     |
| S5-final-viral-combined_k141_1932341  | [full]   | 1042   | No  | NA    | 0  | 0  | Not-determined | Genome-fragment | NA | 0     | 0     |
| S5-final-viral-combined_k141_243471   | [full]   | 4307   | No  | NA    | 0  | 3  | Not-determined | Genome-fragment | NA | 0     | 0     |
| S6_k141_41059                         |          | 1687   | No  | NA    | 0  | 1  | Low-quality    | Genome-fragment | NA | 1.46  | 0     |
| S5-final-viral-combined_k141_1569351  | [full]   | 5450   | No  | NA    | 0  | 2  | Not-determined | Genome-fragment | NA | 0     | 0     |
| S8-final-viral-combined_k141_203141   | [full]   | 1687   | No  | NA    | 0  | 1  | Low-quality    | Genome-fragment | NA | 0.5   | 0     |
| S9-final-viral-combined_k141_397341   | [full]   | 1688   | No  | NA    | 0  | 0  | Low-quality    | Genome-fragment | NA | 0.72  | 0     |
| S11-final-viral-combined_k141_817211  | [full]   | 1688   | No  | NA    | 0  | 0  | Low-quality    | Genome-fragment | NA | 0.72  | 0     |
| S1-final-viral-combined_k141_2807971  | [full]   | 1688   | No  | NA    | 0  | 2  | Low-quality    | Genome-fragment | NA | 0.59  | 0     |
| S17-k141_125584                       |          | 1688   | No  | NA    | 0  | 0  | Low-quality    | Genome-fragment | NA | 3.45  | 0     |
| S5-final-viral-combined_k141_1660711  | [full]   | 6860   | No  | NA    | 0  | 1  | Not-determined | Genome-fragment | NA | 0     | 0     |
| S5-final-viral-combined_k141_2018021  | [full]   | 1481   | No  | NA    | 0  | 0  | Not-determined | Genome-fragment | NA | 0     | 0     |
| S5-final-viral-combined_k141_863051   | [full]   | 8436   | No  | NA    | 0  | 4  | Not-determined | Genome-fragment | NA | 0     | 0     |
| S5-final-viral-combined_k141_863071   | [full]   | 5206   | No  | NA    | 0  | 0  | Not-determined | Genome-fragment | NA | 0     | 0     |
| S12-final-viral-combined_k141_3630601 | [H2gene] | 1688   | No  | NA    | 0  | 0  | Low-quality    | Genome-fragment | NA | 3.62  | 0     |
| S12_k141_281373                       |          | 1688   | No  | NA    | 0  | 0  | Low-quality    | Genome-fragment | NA | 23.86 | 0     |
| S4-final-viral-combined_k141_170461   | [full]   | 1688   | No  | NA    | 0  | 0  | Low-quality    | Genome-fragment | NA | 3.84  | 0     |
| S5-final-viral-combined_k141_777511   | [full]   | 4511   | No  | NA    | 0  | 1  | Not-determined | Genome-fragment | NA | 0     | 0     |
| S5-final-viral-combined_k141_1932951  | [full]   | 1635   | No  | NA    | 0  | 2  | Not-determined | Genome-fragment | NA | 0     | 0     |
| S5-final-viral-combined_k141_1661141  | [full]   | 1091   | No  | NA    | 0  | 0  | Not-determined | Genome-fragment | NA | 0     | 0     |
| S4_k141_15277                         |          | 1688   | No  | NA    | 0  | 0  | Low-quality    | Genome-fragment | NA | 2.99  | 0     |
| S5-final-viral-combined_k141_863761   | [full]   | 1920   | No  | NA    | 0  | 0  | Not-determined | Genome-fragment | NA | 0     | 0     |
| S1-final-viral-combined_k141_113191   | [full]   | 1689   | No  | NA    | 0  | 1  | Low-quality    | Genome-fragment | NA | 4.33  | 0     |
| S5-final-viral-combined_k141_1661741  | [full]   | 1254   | No  | NA    | 0  | 0  | Not-determined | Genome-fragment | NA | 0     | 0     |
| S5-final-viral-combined_k141_507151   | [full]   | 5570   | No  | NA    | 0  | 5  | Not-determined | Genome-fragment | NA | 0     | 0     |
| S5-final-viral-combined_k141_144871   | [full]   | 1689   | No  | NA    | 3  | 0  | Low-quality    | Genome-fragment | NA | 4.94  | 0     |
| S5-final-viral-combined_k141_1759401  | [full]   | 2245   | No  | NA    | 0  | 0  | Not-determined | Genome-fragment | NA | 0     | 0     |
| S5-final-viral-combined_k141_1661861  | [full]   | 2067   | No  | NA    | 0  | 0  | Not-determined | Genome-fragment | NA | 0     | 0     |
| S5-final-viral-combined_k141_507331   | [full]   | 7596   | No  | NA    | 0  | 6  | Not-determined | Genome-fragment | NA | 0     | 0     |
| S5-final-viral-combined_k141_2019331  | [full]   | 1484   | No  | NA    | 0  | 2  | Not-determined | Genome-fragment | NA | 0     | 0     |
| S2_k141_99035                         |          | 1689   | No  | NA    | 0  | 0  | Low-quality    | Genome-fragment | NA | 1.07  | 0     |
| S5-final-viral-combined_k141_507471   | [full]   | 1016   | No  | NA    | 0  | 0  | Not-determined | Genome-fragment | NA | 0     | 0     |
| S5-final-viral-combined_k141_1759631  | [full]   | 4216   | No  | NA    | 0  | 2  | Not-determined | Genome-fragment | NA | 0     | 0     |
| S8-final-viral-combined_k141_597451   | [full]   | 1689   | No  | NA    | 1  | 0  | Low-quality    | Genome-fragment | NA | 2.94  | 0     |
| S5-final-viral-combined_k141_325381   | [full]   | 3237   | No  | NA    | 0  | 2  | Not-determined | Genome-fragment | NA | 0     | 0     |
| S5-final-viral-combined_k141_252421   | [full]   | 2033   | No  | NA    | 0  | 2  | Not-determined | Genome-fragment | NA | 0     | 0     |
| S5-final-viral-combined_k141_325471   | [full]   | 1963   | No  | NA    | 0  | 2  | Not-determined | Genome-fragment | NA | 0     | 0     |
| S1_k141_308365                        |          | 1690   | No  | NA    | 1  | 0  | Low-quality    | Genome-fragment | NA | 4.21  | 0     |
| S5-final-viral-combined_k141_1314541  | [full]   | 1771   | No  | NA    | 0  | 3  | Not-determined | Genome-fragment | NA | 0     | 0     |
| S3_k141_76577                         |          | 1690   | No  | NA    | 0  | 0  | Low-quality    | Genome-fragment | NA | 2.67  | 0     |
| S5-final-viral-combined_k141_150991   | [full]   | 1432   | No  | NA    | 0  | 0  | Not-determined | Genome-fragment | NA | 0     | 0     |
| S5-final-viral-combined_k141_2019881  | [full]   | 1111   | No  | NA    | 0  | 0  | Not-determined | Genome-fragment | NA | 0     | 0     |
| S5-final-viral-combined_k141_2326401  | [full]   | 1645   | No  | NA    | 0  | 0  | Not-determined | Genome-fragment | NA | 0     | 0     |
| S5-final-viral-combined_k141_1130721  | [full]   | 2140   | No  | NA    | 0  | 0  | Not-determined | Genome-fragment | NA | 0     | 0     |
| S5-final-viral-combined_k141_915181   | [full]   | 1690   | No  | NA    | 0  | 1  | Low-quality    | Genome-fragment | NA | 1.29  | 0     |
| S5-final-viral-combined_k141_1897351  | [full]   | 1690   | No  | NA    | 0  | 1  | Low-quality    | Genome-fragment | NA | 3.77  | 0     |
| S2-final-viral-combined_k141_219181   | [full]   | 1690   | No  | NA    | 0  | 0  | Low-quality    | Genome-fragment | NA | 4.21  | 0     |
| S2-final-viral-combined_k141_1845191  | [full]   | 1690   | No  | NA    | 0  | 2  | Low-quality    | Genome-fragment | NA | 3.07  | 0     |
| S6-final-viral-combined_k141_1156191  | [H2gene] | 1690   | No  | NA    | 2  | 0  | Low-quality    | Genome-fragment | NA | 5.58  | 0     |
| S8-final-viral-combined_k141_2505511  | [full]   | 1690   | No  | NA    | 1  | 1  | Low-quality    | Genome-fragment | NA | 2.93  | 0     |
| S5-final-viral-combined_k141_151241   | [full]   | 1427   | No  | NA    | 0  | 3  | Not-determined | Genome-fragment | NA | 0     | 0     |
| S5-final-viral-combined_k141_1662521  | [full]   | 3969   | No  | NA    | 0  | 4  | Not-determined | Genome-fragment | NA | 0     | 0     |
| S8-final-viral-combined_k141_1561801  | [H2gene] | 1690   | No  | NA    | 0  | 0  | Low-quality    | Genome-fragment | NA | 1.1   | 0     |
| S9-final-viral-combined_k141_401761   | [full]   | 1691   | No  | NA    | 0  | 1  | Low-quality    | Genome-fragment | NA | 2.22  | 0     |
| S5-final-viral-combined_k141_1662711  | [full]   | 1314   | No  | NA    | 0  | 1  | Not-determined | Genome-fragment | NA | 0     | 0     |
| S11-final-viral-combined_k141_427511  | [full]   | 1691   | No  | NA    | 0  | 0  | Low-quality    | Genome-fragment | NA | 3.52  | 0     |
| S1-final-viral-combined_k141_3893551  | [full]   | 1691   | No  | NA    | 0  | 0  | Low-quality    | Genome-fragment | NA | 3.71  | 0     |
| S5_k141_122483                        |          | 1691   | No  | NA    | 0  | 1  | Low-quality    | Genome-fragment | NA | 1.6   | 0     |
| S7-final-viral-combined_k141_699721   | [full]   | 1691   | No  | NA    | 0  | 1  | Low-quality    | Genome-fragment | NA | 1.21  | 0     |
| S5-final-viral-combined_k141_1255931  | [full]   | 1394   | No  | NA    | 0  | 1  | Not-determined | Genome-fragment | NA | 0     | 0     |
| S17-final-viral-combined_k141_1488661 | [full]   | 1691   | No  | NA    | 0  | 1  | Low-quality    | Genome-fragment | NA | 0.51  | 0     |
| S5-final-viral-combined_k141_151341   | [full]   | 1837   | No  | NA    | 0  | 1  | Not-determined | Genome-fragment | NA | 0     | 0     |
| S5-final-viral-combined_k141_509151   | [full]   | 1045   | No  | NA    | 0  | 0  | Not-determined | Genome-fragment | NA | 0     | 0     |
| S5-final-viral-combined_k141_509181   | [full]   | 1360   | No  | NA    | 0  | 0  | Not-determined | Genome-fragment | NA | 0     | 0     |
| S5-final-viral-combined_k141_509211   | [full]   | 1088   | No  | NA    | 0  | 2  | Not-determined | Genome-fragment | NA | 0     | 0     |
| S12-final-viral-combined_k141_2354321 | [full]   | 1691   | No  | NA    | 1  | 0  | Low-quality    | Genome-fragment | NA | 4.36  | 0     |
| S12-final-viral-combined_k141_2880081 | [full]   | 1691   | No  | NA    | 0  | 1  | Low-quality    | Genome-fragment | NA | 0.88  | 0     |
| S5-final-viral-combined_k141_231061   | [full]   | 1674   | No  | NA    | 0  | 0  | Not-determined | Genome-fragment | NA | 3.67  | 0     |
| S2-final-viral-combined_k141_139351   | [full]   | 1691   | No  | NA    | 0  | 0  | Low-quality    | Genome-fragment | NA | 3.05  | 0     |
| S2-final-viral-combined_k141_184191   | [full]   | 1691   | No  | NA    | 0  | 1  | Low-quality    | Genome-fragment | NA | 2.05  | 0     |
| S5-final-viral-combined_k141_509551   | [full]   | 1958   | No  | NA    | 0  | 1  | Not-determined | Genome-fragment | NA | 0     | 0     |
| S2-final-viral-combined_k141_1862261  | [full]   | 1691   | No  | NA    | 1  | 0  | Low-quality    | Genome-fragment | NA | 3.35  | 0     |
| S8-final-viral-combined_k141_1878101  | [H2gene] | 1691   | No  | NA    | 1  | 0  | Low-quality    | Genome-fragment | NA | 4.09  | 0     |
| S8_k141_76667                         |          | 1691   | No  | NA    | 0  | 2  | Low-quality    | Genome-fragment | NA | 0.28  | 0     |
| S1-final-viral-combined_k141_494941   | [full]   | 1692   | No  | NA    | 0  | 0  | Low-quality    | Genome-fragment | NA | 2.71  | 0     |
| S1-final-viral-combined_k141_2305831  | [full]   | 1692   | No  | NA    | 0  | 0  | Low-quality    | Genome-fragment | NA | 1.99  | 0     |
| S1-final-viral-combined_k141_1184781  | [full]   | 1927   | No  | NA    | 0  | 0  | Low-quality    | Genome-fragment | NA | 3.84  | 0     |
| S5-final-viral-combined_k141_680861   | [full]   | 1974   | No  | NA    | 0  | 1  | Not-determined | Genome-fragment | NA | 0     | 0     |
| S5-final-viral-combined_k141_231771   | [full]   | 1987   | No  | NA    | 0  | 0  | Not-determined | Genome-fragment | NA | 0     | 0     |
| S5-final-viral-combined_k141_1661781  | [full]   | 2061   | No  | NA    | 0  | 2  | Not-determined | Genome-fragment | NA | 0     | 0     |
| S5-final-viral-combined_k141_231881   | [full]   | 6085   | No  | NA    | 0  | 0  | Not-determined | Genome-fragment | NA | 0     | 0     |
| S1-final-viral-combined_k141_215201   | [full]   | 1692   | No  | NA    | 1  | 0  | Low-quality    | Genome-fragment | NA | 4.06  | 0     |
| S5-final-viral-combined_k141_815311   | [full]   | 2497   | No  | NA    | 0  | 1  | Not-determined | Genome-fragment | NA | 0     | 0     |
| S5-final-viral-combined_k141_1574091  | [full]   | 2231   | No  | NA    | 0  | 1  | Not-determined | Genome-fragment | NA | 0     | 0     |
| S5-final-viral-combined_k141_2109591  | [full]   | 184243 | Yes | 61717 | 7  | 87 | Medium-quality | Genome-fragment | NA | 85.14 | 68.23 |
| S5-final-viral-combined_k141_152281   | [full]   | 2959   | No  | NA    | 0  | 1  | Not-determined | Genome-fragment | NA | 0     | 0     |
| S5-final-viral-combined_k141_185061   | [full]   | 3342   | No  | NA    | 0  | 0  | Not-determined | Genome-fragment | NA | 0     | 0     |
| S5-final-viral-combined_k141_1850671  | [full]   | 1872   | No  | NA    | 0  | 0  | Not-determined | Genome-fragment | NA | 0     | 0     |
| S5-final-viral-combined_k141_1219801  | [full]   | 1371   | No  | NA    | 0  | 2  | Not-determined | Genome-fragment | NA | 0     | 0     |
| S1-final-viral-combined_k141_1060491  | [full]   | 1692   | No  | NA    | 0  | 1  | Low-quality    | Genome-fragment | NA | 1.24  | 0     |
| S1_k141_69213                         |          | 1692   | No  | NA    | 1  | 0  | Low-quality    | Genome-fragment | NA | 3.41  | 0     |
| S2-final-viral-combined_k141_251681   | [full]   | 1692   | No  | NA    | 1  | 0  | Low-quality    | Genome-fragment | NA | 0.91  | 0     |
| S5-final-viral-combined_k141_781621   | [full]   | 4991   | No  | NA    | 0  | 4  | Not-determined | Genome-fragment | NA | 0     | 0     |
| S5-final-viral-combined_k141_327641   | [full]   | 1004   | No  | NA    | 0  | 1  | Not-determined | Genome-fragment | NA | 0     | 0     |
| S2-final-viral-combined_k141_218031   | [full]   | 1692   | No  | NA    | 0  | 1  | Low-quality    | Genome-fragment | NA | 2.36  | 0     |
| S5-final-viral-combined_k141_1040681  | [full]   | 7494   | No  | NA    | 0  | 4  | Not-determined | Genome-fragment | NA | 0     | 0     |
| S5-final-viral-combined_k141_1850891  | [full]   | 6007   | No  | NA    | 0  | 0  | Not-determined | Genome-fragment | NA | 0     | 0     |
| S4_k141_105768                        |          | 1692   | No  | NA    | 0  | 1  | Low-quality    | Genome-fragment | NA | 0.93  | 0     |
| S11-final-viral-combined_k141_2104871 | [full]   | 1693   | No  | NA    | 0  | 0  | Low-quality    | Genome-fragment | NA | 3.13  | 0     |
| S5-final-viral-combined_k14           |          |        |     |       |    |    |                |                 |    |       |       |



|                                      |        |     |    |      |    |                |                 |       |       |
|--------------------------------------|--------|-----|----|------|----|----------------|-----------------|-------|-------|
| 52_k141_156916                       | 1695   | No  | NA | 0    | 0  | Low-quality    | Genome-fragment | 1.22  | 0     |
| 55-final-viral-combined_k141_185242  | 1505   | No  | NA | 0    | 1  | Not-determined | Genome-fragment | NA    | 0     |
| 54-final-viral-combined_k141_119712  | 1695   | No  | NA | 2    | 0  | Low-quality    | Genome-fragment | 2.76  | 0     |
| 55-final-viral-combined_k141_122199  | 1320   | No  | NA | 0    | 3  | Not-determined | Genome-fragment | NA    | 0     |
| 54-final-viral-combined_k141_103198  | 1695   | No  | NA | 1    | 0  | Low-quality    | Genome-fragment | 2.07  | 0     |
| 511-final-viral-combined_k141_102388 | 1696   | No  | NA | 2    | 0  | Low-quality    | Genome-fragment | 3.18  | 0     |
| 51-final-viral-combined_k141_97910   | 1696   | No  | NA | 0    | 0  | Low-quality    | Genome-fragment | 1.95  | 0     |
| 55-final-viral-combined_k141_129741  | 1464   | No  | NA | 0    | 1  | Not-determined | Genome-fragment | NA    | 0     |
| 55-final-viral-combined_k141_193171  | 3045   | No  | NA | 0    | 0  | Not-determined | Genome-fragment | NA    | 0     |
| 55-final-viral-combined_k141_131899  | 1799   | No  | NA | 0    | 3  | Not-determined | Genome-fragment | NA    | 0     |
| 55-final-viral-combined_k141_22994   | 1696   | No  | NA | 2    | 0  | Low-quality    | Genome-fragment | 3.26  | 0     |
| 55-final-viral-combined_k141_23006   | 2223   | No  | NA | 0    | 0  | Not-determined | Genome-fragment | NA    | 0     |
| 55-final-viral-combined_k141_23159   | 1696   | No  | NA | 0    | 1  | Low-quality    | Genome-fragment | 3.29  | 0     |
| 55-final-viral-combined_k141_104921  | 1888   | No  | NA | 0    | 2  | Not-determined | Genome-fragment | NA    | 0     |
| 55-final-viral-combined_k141_122263  | 2007   | No  | NA | 0    | 1  | Not-determined | Genome-fragment | NA    | 0     |
| 55-final-viral-combined_k141_13058   | 1316   | No  | NA | 0    | 2  | Not-determined | Genome-fragment | NA    | 0     |
| 55-final-viral-combined_k141_51421   | 3636   | No  | NA | 0    | 3  | Not-determined | Genome-fragment | NA    | 0     |
| 55-final-viral-combined_k141_60213   | 1919   | No  | NA | 0    | 2  | Not-determined | Genome-fragment | NA    | 0     |
| 55-final-viral-combined_k141_186809  | 1700   | No  | NA | 0    | 0  | Not-determined | Genome-fragment | NA    | 0     |
| 55-final-viral-combined_k141_34083   | 1696   | No  | NA | 1    | 0  | Low-quality    | Genome-fragment | 3.41  | 0     |
| 55-final-viral-combined_k141_122295  | 1639   | No  | NA | 0    | 0  | Not-determined | Genome-fragment | NA    | 0     |
| 55_k141_49741                        | 1696   | No  | NA | 0    | 0  | Low-quality    | Genome-fragment | 3.06  | 0     |
| 57-final-viral-combined_k141_5322    | 1696   | No  | NA | 0    | 2  | Low-quality    | Genome-fragment | 0.93  | 0     |
| 517-final-viral-combined_k141_193758 | 1696   | No  | NA | 0    | 0  | Low-quality    | Genome-fragment | 2.74  | 0     |
| 517-final-viral-combined_k141_92565  | 1696   | No  | NA | 0    | 2  | Low-quality    | Genome-fragment | 3.92  | 0     |
| 55-final-viral-combined_k141_166780  | 1061   | No  | NA | 0    | 1  | Not-determined | Genome-fragment | NA    | 0     |
| 55-final-viral-combined_k141_78434   | 146444 | No  | NA | 4    | 25 | Medium-quality | Genome-fragment | 89.79 | 0     |
| 517-final-viral-combined_k141_5203   | 1696   | No  | NA | 1    | 0  | Low-quality    | Genome-fragment | 2.1   | 0     |
| 517_k141_88249                       | 1696   | No  | NA | 0    | 0  | Low-quality    | Genome-fragment | 0.7   | 0     |
| 55-final-viral-combined_k141_105028  | 2318   | No  | NA | 0    | 4  | Not-determined | Genome-fragment | NA    | 0     |
| 512-final-viral-combined_k141_43364  | 1696   | No  | NA | 2    | 0  | Low-quality    | Genome-fragment | 4.32  | 0     |
| 55-final-viral-combined_k141_156837  | 2716   | No  | NA | 2    | 2  | Not-determined | Genome-fragment | NA    | 0     |
| 52-final-viral-combined_k141_3228    | 1696   | No  | NA | 2    | 0  | Low-quality    | Genome-fragment | 3.65  | 0     |
| 54-final-viral-combined_k141_151269  | 1696   | No  | NA | 0    | 0  | Low-quality    | Genome-fragment | 1.08  | 0     |
| 55-final-viral-combined_k141_23676   | 1646   | No  | NA | 0    | 1  | Not-determined | Genome-fragment | NA    | 0     |
| 56-final-viral-combined_k141_3960    | 1696   | No  | NA | 0    | 0  | Low-quality    | Genome-fragment | 3.54  | 0     |
| 58-final-viral-combined_k141_135995  | 1696   | No  | NA | 1    | 0  | Low-quality    | Genome-fragment | 4.04  | 0     |
| 55-final-viral-combined_k141_166800  | 1642   | No  | NA | 0    | 1  | Not-determined | Genome-fragment | NA    | 0     |
| 55-final-viral-combined_k141_166901  | 3867   | No  | NA | 0    | 5  | Not-determined | Genome-fragment | NA    | 0     |
| 59-final-viral-combined_k141_11148   | 1697   | No  | NA | 0    | 0  | Low-quality    | Genome-fragment | 1.81  | 0     |
| 55-final-viral-combined_k141_105104  | 3175   | No  | NA | 0    | 3  | Not-determined | Genome-fragment | NA    | 0     |
| 511-final-viral-combined_k141_23388  | 1697   | No  | NA | 0    | 0  | Low-quality    | Genome-fragment | 2.82  | 0     |
| 51-final-viral-combined_k141_204207  | 1697   | No  | NA | 0    | 0  | Low-quality    | Genome-fragment | 5.09  | 0     |
| 55-final-viral-combined_k141_78573   | 2161   | No  | NA | 0    | 2  | Not-determined | Genome-fragment | NA    | 0     |
| 55-final-viral-combined_k141_60371   | 8961   | No  | NA | 0    | 2  | Not-determined | Genome-fragment | NA    | 0     |
| 55-final-viral-combined_k141_146171  | 1697   | No  | NA | 0    | 0  | Low-quality    | Genome-fragment | 2     | 0     |
| 57-final-viral-combined_k141_161631  | 1697   | No  | NA | 0    | 0  | Low-quality    | Genome-fragment | 0.87  | 0     |
| 512-final-viral-combined_k141_61176  | 1697   | No  | NA | 0    | 0  | Low-quality    | Genome-fragment | 2.15  | 0     |
| 55-final-viral-combined_k141_211468  | 2568   | No  | NA | 0    | 0  | Not-determined | Genome-fragment | NA    | 0     |
| 52-final-viral-combined_k141_105038  | 1697   | No  | NA | 1    | 0  | Low-quality    | Genome-fragment | 2.82  | 0     |
| 55-final-viral-combined_k141_140300  | 3651   | No  | NA | 0    | 3  | Not-determined | Genome-fragment | NA    | 0     |
| 54-final-viral-combined_k141_37661   | 1697   | No  | NA | 0    | 0  | Low-quality    | Genome-fragment | 2.73  | 0     |
| 512_k141_124790                      | 1698   | No  | NA | 0    | 0  | Low-quality    | Genome-fragment | 2.9   | 0     |
| 55-final-viral-combined_k141_105175  | 1314   | No  | NA | 0    | 0  | Not-determined | Genome-fragment | NA    | 0     |
| 52-final-viral-combined_k141_217341  | 1698   | No  | NA | 0    | 0  | Low-quality    | Genome-fragment | 5.78  | 0     |
| 52-final-viral-combined_k141_177945  | 1698   | No  | NA | 0    | 0  | Low-quality    | Genome-fragment | 2.14  | 0     |
| 55-final-viral-combined_k141_105180  | 1613   | No  | NA | 0    | 0  | Not-determined | Genome-fragment | NA    | 0     |
| 52-final-viral-combined_k141_117159  | 1698   | No  | NA | 2    | 0  | Low-quality    | Genome-fragment | 4.07  | 0     |
| 55-final-viral-combined_k141_140330  | 2069   | No  | NA | 0    | 1  | Not-determined | Genome-fragment | NA    | 0     |
| 52-final-viral-combined_k141_141096  | 1698   | No  | NA | 1    | 0  | Low-quality    | Genome-fragment | 2.48  | 0     |
| 55-final-viral-combined_k141_8517    | 1691   | No  | NA | 0    | 1  | Not-determined | Genome-fragment | NA    | 0     |
| 54_k141_157432                       | 1698   | No  | NA | 0    | 1  | Low-quality    | Genome-fragment | 2.77  | 0     |
| 55-final-viral-combined_k141_122476  | 1953   | No  | NA | 0    | 2  | Not-determined | Genome-fragment | NA    | 0     |
| 55-final-viral-combined_k141_105213  | 1182   | No  | NA | 0    | 1  | Not-determined | Genome-fragment | NA    | 0     |
| 55-final-viral-combined_k141_166929  | 1533   | No  | NA | 0    | 1  | Not-determined | Genome-fragment | NA    | 0     |
| 55-final-viral-combined_k141_122486  | 1045   | No  | NA | 0    | 0  | Not-determined | Genome-fragment | NA    | 0     |
| 58-final-viral-combined_k141_98215   | 1698   | No  | NA | 1    | 0  | Low-quality    | Genome-fragment | 2.75  | 0     |
| 511-final-viral-combined_k141_203551 | 1699   | No  | NA | 0    | 1  | Low-quality    | Genome-fragment | 2.06  | 0     |
| 51-final-viral-combined_k141_251701  | 1699   | No  | NA | 0    | 0  | Low-quality    | Genome-fragment | 2.79  | 0     |
| 51-final-viral-combined_k141_154449  | 1699   | No  | NA | 1    | 0  | Low-quality    | Genome-fragment | 2.57  | 0     |
| 55-final-viral-combined_k141_87267   | 2137   | No  | NA | 0    | 1  | Not-determined | Genome-fragment | NA    | 0     |
| 55-final-viral-combined_k141_122510  | 3782   | No  | NA | 0    | 3  | Not-determined | Genome-fragment | NA    | 0     |
| 55-final-viral-combined_k141_78692   | 1892   | No  | NA | 0    | 0  | Not-determined | Genome-fragment | NA    | 0     |
| 55-final-viral-combined_k141_87288   | 2204   | No  | NA | 0    | 0  | Not-determined | Genome-fragment | NA    | 0     |
| 55-final-viral-combined_k141_194125  | 1959   | No  | NA | 0    | 0  | Not-determined | Genome-fragment | NA    | 0     |
| 55-final-viral-combined_k141_194126  | 1036   | No  | NA | 0    | 1  | Not-determined | Genome-fragment | NA    | 0     |
| 55-final-viral-combined_k141_140366  | 1494   | No  | NA | 0    | 0  | Not-determined | Genome-fragment | NA    | 0     |
| 51-final-viral-combined_k141_375253  | 1699   | No  | NA | 1    | 0  | Low-quality    | Genome-fragment | 2.85  | 0     |
| 53-final-viral-combined_k141_5277    | 1699   | No  | NA | 0    | 0  | Low-quality    | Genome-fragment | 1.58  | 0     |
| 55-final-viral-combined_k141_87311   | 1184   | No  | NA | 0    | 1  | Not-determined | Genome-fragment | NA    | 0     |
| 55-final-viral-combined_k141_32579   | 6286   | No  | NA | 0    | 3  | Not-determined | Genome-fragment | NA    | 0     |
| 53-final-viral-combined_k141_166100  | 1699   | No  | NA | 0    | 0  | Low-quality    | Genome-fragment | 1.17  | 0     |
| 512-final-viral-combined_k141_87303  | 1699   | No  | NA | 0    | 2  | Low-quality    | Genome-fragment | 2.97  | 0     |
| 512-final-viral-combined_k141_172251 | 1699   | No  | NA | 0    | 1  | Low-quality    | Genome-fragment | 2.57  | 0     |
| 54-final-viral-combined_k141_130846  | 1699   | No  | NA | 0    | 0  | Low-quality    | Genome-fragment | 3.95  | 0     |
| 55-final-viral-combined_k141_122597  | 1021   | No  | NA | 0    | 1  | Not-determined | Genome-fragment | NA    | 0     |
| 56_k141_92867                        | 1699   | No  | NA | 1    | 0  | Low-quality    | Genome-fragment | 3.28  | 0     |
| 55-final-viral-combined_k141_194227  | 4258   | No  | NA | 0    | 3  | Not-determined | Genome-fragment | NA    | 0     |
| 55-final-viral-combined_k141_87303   | 1026   | No  | NA | 0    | 0  | Not-determined | Genome-fragment | NA    | 0     |
| 511-final-viral-combined_k141_306873 | 1700   | No  | NA | 2    | 0  | Low-quality    | Genome-fragment | 3.68  | 0     |
| 511-final-viral-combined_k141_176303 | 1700   | No  | NA | 0    | 0  | Low-quality    | Genome-fragment | 3.72  | 0     |
| 51-final-viral-combined_k141_648511  | 1700   | No  | NA | 0    | 1  | Low-quality    | Genome-fragment | 1.85  | 0     |
| 55-final-viral-combined_k141_68985   | 1288   | No  | NA | 0    | 1  | Not-determined | Genome-fragment | NA    | 0     |
| 55-final-viral-combined_k141_23878   | 5083   | No  | NA | 0    | 2  | Not-determined | Genome-fragment | NA    | 0     |
| 57_k141_38595                        | 1700   | No  | NA | 2    | 0  | Low-quality    | Genome-fragment | 3.75  | 0     |
| 517-final-viral-combined_k141_114254 | 1700   | No  | NA | 0    | 1  | Low-quality    | Genome-fragment | 1.95  | 0     |
| 55-final-viral-combined_k141_185330  | 1796   | No  | NA | 0    | 0  | Not-determined | Genome-fragment | NA    | 0     |
| 55-final-viral-combined_k141_41211   | 2128   | No  | NA | 0    | 0  | Not-determined | Genome-fragment | NA    | 0     |
| 517-final-viral-combined_k141_191008 | 1700   | No  | NA | 0    | 0  | Low-quality    | Genome-fragment | 3.59  | 0     |
| 55-final-viral-combined_k141_60650   | 1882   | No  | NA | 0    | 0  | Not-determined | Genome-fragment | NA    | 0     |
| 55-final-viral-combined_k141_8760    | 1765   | No  | NA | 0    | 1  | Not-determined | Genome-fragment | NA    | 0     |
| 517-final-viral-combined_k141_159885 | 1700   | No  | NA | 0    | 1  | Low-quality    | Genome-fragment | 3.19  | 0     |
| 55-final-viral-combined_k141_174641  | 6079   | No  | NA | 0    | 3  | Not-determined | Genome-fragment | NA    | 0     |
| 517-final-viral-combined_k141_61437  | 1700   | Yes | NA | 1001 | 1  | Low-quality    | Genome-fragment | 1.44  | 41.12 |
| 517-final-viral-combined_k141_244453 | 1700   | No  | NA | 1    | 0  | Low-quality    | Genome-fragment | 2.75  | 0     |
| 52-final-viral-combined_k141_236191  | 1700   | No  | NA | 0    | 0  | Low-quality    | Genome-fragment | 1.34  | 0     |
| 56-final-viral-combined_k141_108641  | 1700   | No  | NA | 0    | 0  | Low-quality    | Genome-fragment | 2.04  | 0     |
| 511-final-viral-combined_k141_161278 | 1701   | No  | NA | 0    | 0  | Low-quality    | Genome-fragment | 2.3   | 0     |
| 511-final-viral-combined_k141_314770 | 1701   | No  | NA | 0    | 0  | Low-quality    | Genome-fragment | 4.86  | 0     |
| 55-final-viral-combined_k141_13487   | 2447   | No  | NA | 0    | 3  | Not-determined | Genome-fragment | NA    | 0     |
| 55-final-viral-combined_k141_149516  | 3698   | No  | NA | 0    | 2  | Not-determined | Genome-fragment | NA    | 0     |
| 55-final-viral-combined_k141_149530  | 4786   | No  | NA | 0    | 0  | Not-determined | Genome-fragment | NA    | 0     |
| 55-final-viral-combined_k141_15935   | 1958   | No  | NA | 0    | 1  | Not-determined | Genome-fragment | NA    | 0     |
| 511_k141_321715                      | 1701   | No  | NA | 0    | 0  | Low-quality    | Genome-fragment | 1.79  | 0     |
| 55-final-viral-combined_k141_95769   | 3816   | No  | NA | 0    | 0  | Not-determined | Genome-fragment | NA    | 0     |
| 55-final-viral-combined_k141_185558  | 1275   | No  | NA | 0    | 0  | Not-determined | Genome-fragment | NA    | 0     |
| 53-final-viral-combined_k141_82027   | 1701   | No  | NA | 0    | 2  | Low-quality    | Genome-fragment | 3.55  | 0     |
| 55-final-viral-combined_k141_18446   | 1701   | No  | NA | 1    | 0  | Low-quality    | Genome-fragment | 3.82  | 0     |
| 55-final-viral-combined_k141_12875   | 1701   | No  | NA | 2    | 0  | Low-quality    | Genome-fragment | 2.81  | 0     |
| 57-final-viral-combined_k141_171819  | 1701   | No  | NA | 2    | 0  | Low-quality    | Genome-fragment | 2.58  | 0     |
| 57-final-viral-combined_k141_614255  | 1701   | No  | NA | 0    | 3  | Low-quality    | Genome-fragment | 1.3   | 0     |
| 55-final-viral-combined_k141_219300  | 5121   | No  | NA | 0    | 1  | Not-determined | Genome-fragment | NA    | 0     |
| 54-final-viral-combined_k141_81898   | 1701   | No  | NA | 0    | 1  | Low-quality    | Genome-fragment | 1.12  | 0     |
| 55-final-viral-combined_k141_95841   | 1489   | No  | NA | 0    | 2  | Not-determined | Genome-fragment | NA    | 0     |
| 55_k141_99589                        | 1702   | No  | NA | 0    | 0  | Low-quality    | Genome-fragment | 2.64  | 0     |
| 55-final-viral-combined_k141_42211   | 2514   | No  | NA | 0    | 3  | Not-determined | Genome-fragment | NA    | 0     |
| 55-final-viral-combined_k141_176675  | 5239   | No  | NA | 0    | 2  | Not-determined | Genome-fragment | NA    | 0     |
| 55-final-viral-combined_k141_69244   | 2357   | No  | NA | 0    | 0  | Not-determined | Genome-fragment | NA    | 0     |
| 57-final-viral-combined_k141_105267  | 1702   | No  | NA | 0    | 0  | Low-quality    | Genome-fragment | 2.07  | 0     |
| 517_k141_11093                       | 1702   | No  | NA | 3    | 0  | Low-quality    | Genome-fragment | 5.9   | 0     |
| 52-final-viral-combined_k141_83797   | 1702   | No  | NA | 1    | 0  | Low-quality    | Genome-fragment | 4.07  | 0     |
| 55-final-viral-combined_k141_140651  | 1668   | No  | NA | 0    | 2  | Not-determined | Genome-fragment | NA    | 0     |
| 55-final-viral-combined_k141_140662  | 2416   | No  | NA | 0    | 1  | Not-determined | Genome-fragment | NA    | 0     |
| 55-final-viral-combined_k141_13669   | 1245   | No  | NA | 0    | 0  | Not-determined | Genome-fragment | NA    | 0     |
| 55-final-viral-combined_k141_42258   | 7216   | No  | NA | 0    | 0  | Not-determined | Genome-fragment | NA    | 0     |
| 54-final-viral-combined_k141_157658  | 1702   | No  | NA | 0    | 0  | Low-quality    | Genome-fragment | 2.8   | 0     |
| 55-final-viral-combined_k141_122936  | 1252   | No  | NA | 0    | 0  | Not-determined | Genome-fragment |       |       |



|                                       |           |       |      |    |   |    |                |                 |                 |       |      |
|---------------------------------------|-----------|-------|------|----|---|----|----------------|-----------------|-----------------|-------|------|
| S5-final-viral-combined_k141_790421   | [full]    | 2660  | No   | NA | 0 | 3  | Not-determined | Genome-fragment | NA              |       | 0    |
| S17-final-viral-combined_k141_451921  | [full]    | 1704  | No   | NA | 0 | 0  | Low-quality    | Genome-fragment | NA              | 4.17  | 0    |
| S5-final-viral-combined_k141_194619   | [full]    | 2461  | No   | NA | 0 | 0  | Not-determined | Genome-fragment | NA              | 0     | 0    |
| S5-final-viral-combined_k141_339191   | [full]    | 1552  | No   | NA | 0 | 0  | Not-determined | Genome-fragment | NA              | 0     | 0    |
| S5-final-viral-combined_k141_879031   | [full]    | 1387  | No   | NA | 0 | 0  | 1              | Not-determined  | Genome-fragment | NA    | 0    |
| S5-final-viral-combined_k141_339271   | [full]    | 1007  | No   | NA | 0 | 0  | 0              | Not-determined  | Genome-fragment | NA    | 0    |
| S12-final-viral-combined_k141_1508821 | [full]    | 1704  | No   | NA | 1 | 0  | Low-quality    | Genome-fragment | NA              | 3.71  | 0    |
| S5-final-viral-combined_k141_160361   | [full]    | 1150  | No   | NA | 0 | 0  | 1              | Not-determined  | Genome-fragment | NA    | 0    |
| S2-final-viral-combined_k141_176861   | [full]    | 1704  | No   | NA | 0 | 2  | Low-quality    | Genome-fragment | NA              | 0.57  | 0    |
| S5-final-viral-combined_k141_194648   | [full]    | 2499  | No   | NA | 0 | 2  | Not-determined | Genome-fragment | NA              | 0     | 0    |
| S5-final-viral-combined_k141_123221   | [full]    | 1337  | No   | NA | 0 | 2  | Not-determined | Genome-fragment | NA              | 0     | 0    |
| S2-final-viral-combined_k141_109751   | [full]    | 1704  | No   | NA | 0 | 0  | 0              | Low-quality     | Genome-fragment | NA    | 5.09 |
| S5-final-viral-combined_k141_1770561  | [full]    | 1231  | No   | NA | 0 | 0  | Not-determined | Genome-fragment | NA              | 0     | 0    |
| S5-final-viral-combined_k141_1675691  | [full]    | 2560  | No   | NA | 0 | 1  | Not-determined | Genome-fragment | NA              | 0     | 0    |
| S5-final-viral-combined_k141_1946721  | [full]    | 2337  | No   | NA | 0 | 0  | 0              | Not-determined  | Genome-fragment | NA    | 0    |
| S4-final-viral-combined_k141_771351   | [full]    | 1034  | No   | NA | 0 | 1  | Low-quality    | Genome-fragment | NA              | 4.23  | 0    |
| S1-final-viral-combined_k141_3228541  | [full]    | 1705  | No   | NA | 1 | 0  | Low-quality    | Genome-fragment | NA              | 3.85  | 0    |
| S5-final-viral-combined_k141_242711   | [full]    | 8106  | No   | NA | 0 | 5  | Not-determined | Genome-fragment | NA              | 2.21  | 0    |
| S5-final-viral-combined_k141_1461321  | [full]    | 1705  | No   | NA | 0 | 1  | Low-quality    | Genome-fragment | NA              | 2.18  | 0    |
| S5-final-viral-combined_k141_960801   | [full]    | 2567  | No   | NA | 0 | 0  | Not-determined | Genome-fragment | NA              | 0     | 0    |
| S5-final-viral-combined_k141_242881   | [full]    | 1441  | No   | NA | 0 | 2  | Not-determined | Genome-fragment | NA              | 0     | 0    |
| S7_k141_51537                         |           | 1705  | No   | NA | 1 | 0  | Low-quality    | Genome-fragment | NA              | 4.62  | 0    |
| S17-final-viral-combined_k141_1210981 | [full]    | 1705  | No   | NA | 1 | 0  | Low-quality    | Genome-fragment | NA              | 0     | 0    |
| S5-final-viral-combined_k141_879701   | [full]    | 1202  | No   | NA | 0 | 1  | Not-determined | Genome-fragment | NA              | 3.21  | 0    |
| S12-final-viral-combined_k141_48421   | [full]    | 1705  | No   | NA | 0 | 1  | Low-quality    | Genome-fragment | NA              | 2.63  | 0    |
| S4_k141_150635                        |           | 1705  | No   | NA | 0 | 1  | Low-quality    | Genome-fragment | NA              | 1.82  | 0    |
| S6-final-viral-combined_k141_936811   | [full]    | 1705  | No   | NA | 0 | 1  | Low-quality    | Genome-fragment | NA              | 3.15  | 0    |
| S11-final-viral-combined_k141_3063761 | [full]    | 1706  | No   | NA | 0 | 0  | Low-quality    | Genome-fragment | NA              | 0     | 0    |
| S5-final-viral-combined_k141_2119701  | [full]    | 1024  | No   | NA | 0 | 0  | Not-determined | Genome-fragment | NA              | 0     | 0    |
| S5-final-viral-combined_k141_693571   | [full]    | 3486  | No   | NA | 0 | 3  | Not-determined | Genome-fragment | NA              | 0     | 0    |
| S1_k141_262085                        |           | 1706  | No   | NA | 0 | 1  | Low-quality    | Genome-fragment | NA              | 0.75  | 0    |
| S1_k141_196242                        |           | 1706  | No   | NA | 1 | 0  | Low-quality    | Genome-fragment | NA              | 1.11  | 0    |
| S5-final-viral-combined_k141_1233061  | [full]    | 4009  | No   | NA | 0 | 2  | Not-determined | Genome-fragment | NA              | 0     | 0    |
| S5-final-viral-combined_k141_1676501  | [full]    | 3663  | No   | NA | 0 | 2  | Not-determined | Genome-fragment | NA              | 0     | 0    |
| S5-final-viral-combined_k141_1305781  | [H2gene]  | 1706  | No   | NA | 1 | 0  | Low-quality    | Genome-fragment | NA              | 4.77  | 0    |
| S7-final-viral-combined_k141_2391361  | [H2gene]  | 1706  | No   | NA | 0 | 1  | Low-quality    | Genome-fragment | NA              | 4.34  | 0    |
| S5-final-viral-combined_k141_1057571  | [full]    | 29322 | No   | NA | 0 | 11 | Not-determined | Genome-fragment | NA              | 0     | 0    |
| S5-final-viral-combined_k141_1771431  | [full]    | 2092  | No   | NA | 0 | 0  | Not-determined | Genome-fragment | NA              | 0     | 0    |
| S5-final-viral-combined_k141_1584591  | [full]    | 2897  | No   | NA | 0 | 1  | Not-determined | Genome-fragment | NA              | 0     | 0    |
| S5-final-viral-combined_k141_1499621  | [full]    | 1367  | No   | NA | 0 | 2  | Not-determined | Genome-fragment | NA              | 0     | 0    |
| S5-final-viral-combined_k141_1676901  | [full]    | 5460  | No   | NA | 0 | 1  | Not-determined | Genome-fragment | NA              | 1.17  | 0    |
| S17-final-viral-combined_k141_257691  | [full]    | 1706  | No   | NA | 0 | 1  | Low-quality    | Genome-fragment | NA              | 4.3   | 0    |
| S12_k141_93500                        |           | 1706  | No   | NA | 2 | 0  | Low-quality    | Genome-fragment | NA              | 2.88  | 0    |
| S2-final-viral-combined_k141_1905681  | [full]    | 1706  | No   | NA | 0 | 1  | Low-quality    | Genome-fragment | NA              | 0.82  | 0    |
| S2-final-viral-combined_k141_484401   | [full]    | 1706  | No   | NA | 0 | 1  | Low-quality    | Genome-fragment | NA              | 0     | 0    |
| S5-final-viral-combined_k141_1233341  | [full]    | 4702  | No   | NA | 0 | 1  | Not-determined | Genome-fragment | NA              | 2.08  | 0    |
| S4_k141_48294                         |           | 1144  | No   | NA | 0 | 1  | Not-determined | Genome-fragment | NA              | 0     | 0    |
| S5-final-viral-combined_k141_2029651  | [full]    | 1706  | No   | NA | 0 | 1  | Low-quality    | Genome-fragment | NA              | 0     | 0    |
| S8-final-viral-combined_k141_1994771  | [full]    | 2401  | No   | NA | 0 | 0  | Not-determined | Genome-fragment | NA              | 3.42  | 0    |
| S5-final-viral-combined_k141_1994771  | [full]    | 1706  | No   | NA | 0 | 0  | Low-quality    | Genome-fragment | NA              | 0     | 0    |
| S5-final-viral-combined_k141_792061   | [full]    | 2355  | No   | NA | 0 | 1  | Not-determined | Genome-fragment | NA              | 0     | 0    |
| S5-final-viral-combined_k141_427751   | [full]    | 2291  | No   | NA | 0 | 2  | Not-determined | Genome-fragment | NA              | 0     | 0    |
| S5-final-viral-combined_k141_161101   | [full]    | 1998  | No   | NA | 0 | 1  | Not-determined | Genome-fragment | NA              | 0     | 0    |
| S5-final-viral-combined_k141_1859761  | [full]    | 1030  | No   | NA | 0 | 0  | Not-determined | Genome-fragment | NA              | 0     | 0    |
| S5-final-viral-combined_k141_1859841  | [full]    | 1066  | No   | NA | 0 | 1  | Not-determined | Genome-fragment | NA              | 0     | 0    |
| S1-final-viral-combined_k141_2545191  | [full]    | 1707  | No   | NA | 1 | 1  | Low-quality    | Genome-fragment | NA              | 0.18  | 73.7 |
| S5-final-viral-combined_k141_161811   | [full]    | 1754  | No   | NA | 0 | 2  | Not-determined | Genome-fragment | NA              | 0     | 0    |
| S5-final-viral-combined_k141_1859911  | [full]    | 1428  | No   | NA | 0 | 2  | Not-determined | Genome-fragment | NA              | 0     | 0    |
| S5-final-viral-combined_k141_1141251  | [full]    | 7922  | No   | NA | 0 | 5  | Not-determined | Genome-fragment | NA              | 0     | 0    |
| S5-final-viral-combined_k141_161921   | [full]    | 2287  | No   | NA | 0 | 1  | Not-determined | Genome-fragment | NA              | 0     | 0    |
| S5-final-viral-combined_k141_792231   | [full]    | 1951  | No   | NA | 0 | 2  | Not-determined | Genome-fragment | NA              | 4.08  | 0    |
| S3-final-viral-combined_k141_344751   | [full]    | 1707  | No   | NA | 0 | 2  | Low-quality    | Genome-fragment | NA              | 2.84  | 0    |
| S12-final-viral-combined_k141_2705791 | [full]    | 1707  | No   | NA | 0 | 0  | Low-quality    | Genome-fragment | NA              | 0     | 0    |
| S5-final-viral-combined_k141_1059951  | [full]    | 2100  | No   | NA | 0 | 1  | Not-determined | Genome-fragment | NA              | 3.8   | 0    |
| S2-final-viral-combined_k141_1342131  | [full]    | 1707  | No   | NA | 0 | 0  | Low-quality    | Genome-fragment | NA              | 0     | 0    |
| S5-final-viral-combined_k141_162351   | [full]    | 3802  | No   | NA | 0 | 0  | Not-determined | Genome-fragment | NA              | 0     | 0    |
| S5-final-viral-combined_k141_341721   | [full]    | 2786  | No   | NA | 0 | 3  | Not-determined | Genome-fragment | NA              | 2.37  | 0    |
| S4_k141_42227                         |           | 1707  | No   | NA | 1 | 0  | Low-quality    | Genome-fragment | NA              | 0     | 0    |
| S5-final-viral-combined_k141_1678551  | [full]    | 3209  | No   | NA | 0 | 2  | Not-determined | Genome-fragment | NA              | 3.79  | 0    |
| S5-final-viral-combined_k141_244221   | [full]    | 2370  | No   | NA | 0 | 0  | Not-determined | Genome-fragment | NA              | 0     | 0    |
| S8-final-viral-combined_k141_21741    | [partial] | 1707  | No   | NA | 0 | 0  | Low-quality    | Genome-fragment | NA              | 0     | 0    |
| S5-final-viral-combined_k141_114191   | [full]    | 1704  | No   | NA | 0 | 0  | Not-determined | Genome-fragment | NA              | 0     | 0    |
| S5-final-viral-combined_k141_1950691  | [full]    | 2028  | No   | NA | 0 | 2  | Not-determined | Genome-fragment | NA              | 3.16  | 0    |
| S11-final-viral-combined_k141_1007181 | [full]    | 1708  | No   | NA | 2 | 0  | Low-quality    | Genome-fragment | NA              | 0     | 0    |
| S5-final-viral-combined_k141_106021   | [full]    | 3459  | No   | NA | 0 | 2  | Not-determined | Genome-fragment | NA              | 0     | 0    |
| S5-final-viral-combined_k141_882041   | [full]    | 1376  | No   | NA | 0 | 1  | Not-determined | Genome-fragment | NA              | 2.68  | 0    |
| S5-final-viral-combined_k141_1142271  | [full]    | 2739  | No   | NA | 0 | 2  | Not-determined | Genome-fragment | NA              | 3.81  | 0    |
| S11-final-viral-combined_k141_2307241 | [H2gene]  | 1708  | No   | NA | 1 | 0  | Low-quality    | Genome-fragment | NA              | 0     | 0    |
| S5-final-viral-combined_k141_864471   | [full]    | 4807  | No   | NA | 0 | 0  | Not-determined | Genome-fragment | NA              | 0     | 0    |
| S5-final-viral-combined_k141_163131   | [full]    | 2501  | No   | NA | 0 | 3  | Not-determined | Genome-fragment | NA              | 0     | 0    |
| S5-final-viral-combined_k141_428351   | [full]    | 1082  | No   | NA | 0 | 0  | Not-determined | Genome-fragment | NA              | 0     | 0    |
| S5-final-viral-combined_k141_264531   | [full]    | 1442  | No   | NA | 0 | 0  | Not-determined | Genome-fragment | NA              | 0     | 0    |
| S5-final-viral-combined_k141_1060641  | [full]    | 1524  | No   | NA | 0 | 1  | Not-determined | Genome-fragment | NA              | 0     | 0    |
| S5-final-viral-combined_k141_882431   | [full]    | 1994  | No   | NA | 0 | 1  | Not-determined | Genome-fragment | NA              | 1.18  | 0    |
| S1-final-viral-combined_k141_425051   | [full]    | 1708  | No   | NA | 0 | 1  | Low-quality    | Genome-fragment | NA              | 3.65  | 0    |
| S1_k141_13224                         |           | 1708  | No   | NA | 0 | 0  | Low-quality    | Genome-fragment | NA              | 3.23  | 0    |
| S1_k141_394168                        |           | 1708  | No   | NA | 0 | 0  | Low-quality    | Genome-fragment | NA              | 2.47  | 0    |
| S5-final-viral-combined_k141_2030961  | [full]    | 1177  | No   | NA | 0 | 1  | Not-determined | Genome-fragment | NA              | 2.7   | 0    |
| S12-final-viral-combined_k141_2393111 | [full]    | 1708  | No   | NA | 0 | 1  | Low-quality    | Genome-fragment | NA              | 2.68  | 0    |
| S5-final-viral-combined_k141_1861301  | [full]    | 2062  | No   | NA | 0 | 2  | Not-determined | Genome-fragment | NA              | 2.76  | 0    |
| S12-final-viral-combined_k141_2784341 | [full]    | 1708  | No   | NA | 0 | 1  | Low-quality    | Genome-fragment | NA              | 2.08  | 0    |
| S12-final-viral-combined_k141_1240151 | [H2gene]  | 1748  | No   | NA | 0 | 1  | Low-quality    | Genome-fragment | NA              | 2.7   | 0    |
| S2-final-viral-combined_k141_1041261  | [full]    | 1708  | No   | NA | 1 | 0  | Low-quality    | Genome-fragment | NA              | 2.2   | 0    |
| S5-final-viral-combined_k141_1143721  | [full]    | 2283  | No   | NA | 0 | 1  | Not-determined | Genome-fragment | NA              | 2.81  | 0    |
| S8-final-viral-combined_k141_1031401  | [full]    | 1708  | No   | NA | 0 | 0  | Low-quality    | Genome-fragment | NA              | 2.79  | 0    |
| S1-final-viral-combined_k141_2186701  | [full]    | 1709  | No   | NA | 2 | 0  | Low-quality    | Genome-fragment | NA              | 0.87  | 0    |
| S5_k141_21514                         |           | 1709  | No   | NA | 1 | 0  | Low-quality    | Genome-fragment | NA              | 0     | 0    |
| S5-final-viral-combined_k141_1307581  | [full]    | 1944  | No   | NA | 0 | 10 | Not-determined | Genome-fragment | NA              | 0     | 0    |
| S5-final-viral-combined_k141_1236881  | [full]    | 2644  | No   | NA | 0 | 1  | Not-determined | Genome-fragment | NA              | 0     | 0    |
| S5-final-viral-combined_k141_2031681  | [full]    | 5625  | No   | NA | 0 | 1  | Not-determined | Genome-fragment | NA              | 0     | 0    |
| S5-final-viral-combined_k141_212641   | [full]    | 3508  | No   | NA | 0 | 3  | Not-determined | Genome-fragment | NA              | 0     | 0    |
| S5-final-viral-combined_k141_1231621  | [full]    | 4195  | No   | NA | 0 | 1  | Not-determined | Genome-fragment | NA              | 0     | 0    |
| S5-final-viral-combined_k141_1952091  | [full]    | 1742  | No   | NA | 0 | 1  | Not-determined | Genome-fragment | NA              | 0     | 0    |
| S5-final-viral-combined_k141_866641   | [full]    | 1677  | No   | NA | 0 | 0  | Not-determined | Genome-fragment | NA              | 0     | 0    |
| S5-final-viral-combined_k141_883951   | [full]    | 2350  | No   | NA | 0 | 2  | Not-determined | Genome-fragment | NA              | 0     | 0    |
| S5-final-viral-combined_k141_1952401  | [full]    | 1640  | No   | NA | 0 | 1  | Not-determined | Genome-fragment | NA              | 0     | 0    |
| S5-final-viral-combined_k141_1503311  | [full]    | 3689  | No   | NA | 0 | 0  | Not-determined | Genome-fragment | NA              | 0     | 0    |
| S5-final-viral-combined_k141_527621   | [full]    | 1772  | No   | NA | 0 | 0  | Not-determined | Genome-fragment | NA              | 10.32 | 0    |
| S4-final-viral-combined_k141_163371   | [full]    | 1709  | No   | NA | 0 | 0  | Low-quality    | Genome-fragment | NA              | 4.41  | 0    |
| S8-final-viral-combined_k141_1230931  | [full]    | 1709  | No   | NA | 1 | 0  | Low-quality    | Genome-fragment | NA              | 4.13  | 0    |
| S8_k141_223383                        |           | 1709  | No   | NA | 2 | 0  | Low-quality    | Genome-fragment | NA              | 0     | 0    |
| S5-final-viral-combined_k141_967471   | [full]    | 1117  | No   | NA | 0 | 1  | Not-determined | Genome-fragment | NA              | 0     | 0    |
| S5-final-viral-combined_k141_1862231  | [full]    | 1585  | No   | NA | 0 | 2  | Not-determined | Genome-fragment | NA              | 2.82  | 0    |
| S11-final-viral-combined_k141_461681  | [full]    | 1710  | No   | NA | 1 | 0  | Low-quality    | Genome-fragment | NA              | 2.47  | 0    |
| S1-final-viral-combined_k141_904091   | [full]    | 1710  | No   | NA | 1 | 0  | Low-quality    | Genome-fragment | NA              | 2.65  | 0    |
| S17-final-viral-combined_k141_742011  | [full]    | 1710  | No   | NA | 2 | 0  | Low-quality    | Genome-fragment | NA              | 0     | 0    |
| S5-final-viral-combined_k141_1503821  | [full]    | 5162  | No   | NA | 0 | 3  | Not-determined | Genome-fragment | NA              | 0     | 0    |
| S5-final-viral-combined_k141_2123651  | [full]    | 1184  | No   | NA | 0 | 0  | Not-determined | Genome-fragment | NA              | 0     | 0    |
| S5-final-viral-combined_k141_1952841  | [full]    | 1748  | No   | NA | 0 | 0  | Not-determined | Genome-fragment | NA              | 0     | 0    |
| S2-final-viral-combined_k141_1197161  | [H2gene]  | 1710  | No   | NA | 1 | 0  | Low-quality    | Genome-fragment | NA              | 2.85  | 0    |
| S4_k141_216160                        |           | 1710  | No   | NA | 0 | 1  | Low-quality    | Genome-fragment | NA              | 2.52  | 0    |
| S5-final-viral-combined_k141_1589171  | [full]    | 1576  | No</ |    |   |    |                |                 |                 |       |      |



|                                      |          |       |    |    |    |   |                |                 |    |       |   |
|--------------------------------------|----------|-------|----|----|----|---|----------------|-----------------|----|-------|---|
| S5-final-viral-combined_k141_249661  | [full]   | 2171  | No | NA | 0  | 2 | Not-determined | Genome-fragment | NA | 4.43  | 0 |
| S9-final-viral-combined_k141_129791  | [full]   | 1713  | No | NA | 0  | 1 | Low-quality    | Genome-fragment | NA | 2.78  | 0 |
| S9-final-viral-combined_k141_683781  | [full]   | 1713  | No | NA | 0  | 0 | Low-quality    | Genome-fragment | NA | 4.14  | 0 |
| S1-final-viral-combined_k141_305434  | [full]   | 1713  | No | NA | 2  | 0 | Low-quality    | Genome-fragment | NA | 2.79  | 0 |
| S5-final-viral-combined_k141_159144  | [full]   | 9738  | No | NA | 0  | 7 | Not-determined | Genome-fragment | NA | 4.99  | 0 |
| S1-final-viral-combined_k141_292743  | [H2gene] | 1713  | No | NA | 1  | 0 | Low-quality    | Genome-fragment | NA | 4.99  | 0 |
| S5-final-viral-combined_k141_203520  | [full]   | 16250 | No | NA | 0  | 6 | Not-determined | Genome-fragment | NA | 4.25  | 0 |
| S5-final-viral-combined_k141_139815  | [full]   | 1713  | No | NA | 0  | 0 | Low-quality    | Genome-fragment | NA | 0     | 0 |
| S5-final-viral-combined_k141_203510  | [full]   | 2889  | No | NA | 0  | 2 | Not-determined | Genome-fragment | NA | 0     | 0 |
| S5-final-viral-combined_k141_150709  | [full]   | 3128  | No | NA | 0  | 3 | Not-determined | Genome-fragment | NA | 2.85  | 0 |
| S12-final-viral-combined_k141_304540 | [full]   | 1713  | No | NA | 0  | 0 | Low-quality    | Genome-fragment | NA | 2.78  | 0 |
| S12-final-viral-combined_k141_199937 | [full]   | 1713  | No | NA | 0  | 0 | Low-quality    | Genome-fragment | NA | 3.85  | 0 |
| S12-final-viral-combined_k141_132310 | [H2gene] | 1713  | No | NA | 1  | 0 | Low-quality    | Genome-fragment | NA | 0.91  | 0 |
| S5-final-viral-combined_k141_159195  | [full]   | 2056  | No | NA | 0  | 0 | Not-determined | Genome-fragment | NA | 1.37  | 0 |
| S2-final-viral-combined_k141_112222  | [full]   | 1713  | No | NA | 0  | 2 | Low-quality    | Genome-fragment | NA | 2.83  | 0 |
| S5-final-viral-combined_k141_114701  | [full]   | 2526  | No | NA | 0  | 2 | Not-determined | Genome-fragment | NA | 4.83  | 0 |
| S4-final-viral-combined_k141_116196  | [full]   | 1713  | No | NA | 1  | 0 | Low-quality    | Genome-fragment | NA | 1.85  | 0 |
| S5-final-viral-combined_k141_432881  | [full]   | 1923  | No | NA | 0  | 1 | Not-determined | Genome-fragment | NA | 3.6   | 0 |
| S8-final-viral-combined_k141_158401  | [full]   | 1713  | No | NA | 1  | 0 | Low-quality    | Genome-fragment | NA | 60.87 | 0 |
| S5-final-viral-combined_k141_168346  | [full]   | 1985  | No | NA | 0  | 1 | Not-determined | Genome-fragment | NA | 4.97  | 0 |
| S5-final-viral-combined_k141_114714  | [full]   | 2047  | No | NA | 0  | 2 | Not-determined | Genome-fragment | NA | 2.8   | 0 |
| S5-final-viral-combined_k141_971621  | [full]   | 5992  | No | NA | 0  | 5 | Not-determined | Genome-fragment | NA | 0     | 0 |
| S5-final-viral-combined_k141_52962   | [full]   | 1828  | No | NA | 0  | 0 | Not-determined | Genome-fragment | NA | 0     | 0 |
| S5-final-viral-combined_k141_212658  | [full]   | 1824  | No | NA | 0  | 1 | Not-determined | Genome-fragment | NA | 0     | 0 |
| S5-final-viral-combined_k141_79882   | [full]   | 1511  | No | NA | 0  | 2 | Not-determined | Genome-fragment | NA | 0     | 0 |
| S11-final-viral-combined_k141_58746  | [full]   | 1714  | No | NA | 1  | 0 | Low-quality    | Genome-fragment | NA | 0     | 0 |
| S5-final-viral-combined_k141_106597  | [full]   | 25082 | No | NA | 13 | 0 | Medium-quality | Genome-fragment | NA | 0     | 0 |
| S1-final-viral-combined_k141_175559  | [full]   | 1714  | No | NA | 1  | 0 | Low-quality    | Genome-fragment | NA | 0     | 0 |
| S5-final-viral-combined_k141_25068   | [full]   | 2051  | No | NA | 0  | 2 | Not-determined | Genome-fragment | NA | 0     | 0 |
| S5-final-viral-combined_k141_25075   | [full]   | 1759  | No | NA | 0  | 1 | Not-determined | Genome-fragment | NA | 0     | 0 |
| S5-final-viral-combined_k141_124167  | [full]   | 1523  | No | NA | 0  | 1 | Not-determined | Genome-fragment | NA | 0     | 0 |
| S5-final-viral-combined_k141_79904   | [full]   | 2376  | No | NA | 0  | 2 | Not-determined | Genome-fragment | NA | 0     | 0 |
| S5-final-viral-combined_k141_106635  | [full]   | 2451  | No | NA | 0  | 1 | Not-determined | Genome-fragment | NA | 0     | 0 |
| S5-final-viral-combined_k141_141604  | [full]   | 5429  | No | NA | 0  | 4 | Not-determined | Genome-fragment | NA | 0     | 0 |
| S5-final-viral-combined_k141_97249   | [full]   | 1489  | No | NA | 0  | 1 | Not-determined | Genome-fragment | NA | 0     | 0 |
| S5-final-viral-combined_k141_150798  | [full]   | 1507  | No | NA | 0  | 0 | Not-determined | Genome-fragment | NA | 0     | 0 |
| S5-final-viral-combined_k141_70025   | [full]   | 3199  | No | NA | 0  | 1 | Not-determined | Genome-fragment | NA | 0     | 0 |
| S5-final-viral-combined_k141_33054   | [full]   | 4015  | No | NA | 0  | 4 | Not-determined | Genome-fragment | NA | 0     | 0 |
| S5-final-viral-combined_k141_203078  | [full]   | 1672  | No | NA | 0  | 0 | Not-determined | Genome-fragment | NA | 0     | 0 |
| S5-final-viral-combined_k141_141635  | [full]   | 6494  | No | NA | 0  | 4 | Not-determined | Genome-fragment | NA | 0     | 0 |
| S1_k141_20434                        |          | 1714  | No | NA | 0  | 1 | Low-quality    | Genome-fragment | NA | 4.83  | 0 |
| S17-final-viral-combined_k141_204352 | [full]   | 1714  | No | NA | 0  | 0 | Low-quality    | Genome-fragment | NA | 1.85  | 0 |
| S5-final-viral-combined_k141_61498   | [full]   | 5091  | No | NA | 0  | 5 | Not-determined | Genome-fragment | NA | 0     | 0 |
| S12-final-viral-combined_k141_79985  | [full]   | 1714  | No | NA | 3  | 0 | Low-quality    | Genome-fragment | NA | 2.08  | 0 |
| S2-final-viral-combined_k141_77557   | [full]   | 1714  | No | NA | 0  | 0 | Low-quality    | Genome-fragment | NA | 5.07  | 0 |
| S5-final-viral-combined_k141_18884   | [full]   | 3440  | No | NA | 0  | 2 | Not-determined | Genome-fragment | NA | 0     | 0 |
| S4-final-viral-combined_k141_66128   | [H2gene] | 1714  | No | NA | 1  | 0 | Low-quality    | Genome-fragment | NA | 1.18  | 0 |
| S5-final-viral-combined_k141_14648   | [full]   | 2195  | No | NA | 0  | 0 | Not-determined | Genome-fragment | NA | 0.42  | 0 |
| S11-final-viral-combined_k141_26638  | [full]   | 1715  | No | NA | 0  | 1 | Low-quality    | Genome-fragment | NA | 3.61  | 0 |
| S5-final-viral-combined_k141_141680  | [full]   | 1026  | No | NA | 0  | 2 | Not-determined | Genome-fragment | NA | 1.26  | 0 |
| S11-final-viral-combined_k141_200398 | [full]   | 1715  | No | NA | 1  | 0 | Low-quality    | Genome-fragment | NA | 2.42  | 0 |
| S5-final-viral-combined_k141_232152  | [full]   | 1715  | No | NA | 0  | 0 | Low-quality    | Genome-fragment | NA | 0.5   | 0 |
| S5-final-viral-combined_k141_159341  | [full]   | 2724  | No | NA | 2  | 0 | Not-determined | Genome-fragment | NA | 1.42  | 0 |
| S5-final-viral-combined_k141_124219  | [full]   | 7423  | No | NA | 0  | 6 | Not-determined | Genome-fragment | NA | 2.23  | 0 |
| S5-final-viral-combined_k141_97290   | [full]   | 1114  | No | NA | 0  | 1 | Not-determined | Genome-fragment | NA | 1.12  | 0 |
| S1-final-viral-combined_k141_157669  | [full]   | 1715  | No | NA | 4  | 0 | Low-quality    | Genome-fragment | NA | 3.03  | 0 |
| S3-final-viral-combined_k141_35375   | [full]   | 1715  | No | NA | 0  | 0 | Low-quality    | Genome-fragment | NA | 3.25  | 0 |
| S5-final-viral-combined_k141_159401  | [full]   | 3366  | No | NA | 0  | 1 | Not-determined | Genome-fragment | NA | 4.67  | 0 |
| S5-final-viral-combined_k141_88938   | [full]   | 2488  | No | NA | 0  | 2 | Not-determined | Genome-fragment | NA | 0.32  | 0 |
| S5-final-viral-combined_k141_61605   | [full]   | 1224  | No | NA | 0  | 1 | Not-determined | Genome-fragment | NA | 0     | 0 |
| S5-final-viral-combined_k141_14037   | [full]   | 1715  | No | NA | 0  | 0 | Low-quality    | Genome-fragment | NA | 0     | 0 |
| S5-final-viral-combined_k141_612199  | [full]   | 1715  | No | NA | 0  | 0 | Low-quality    | Genome-fragment | NA | 0     | 0 |
| S17-final-viral-combined_k141_246899 | [full]   | 1715  | No | NA | 0  | 1 | Low-quality    | Genome-fragment | NA | 0     | 0 |
| S5-final-viral-combined_k141_70163   | [full]   | 2558  | No | NA | 0  | 3 | Not-determined | Genome-fragment | NA | 4.41  | 0 |
| S5-final-viral-combined_k141_97359   | [full]   | 3762  | No | NA | 0  | 3 | Not-determined | Genome-fragment | NA | 1.26  | 0 |
| S5-final-viral-combined_k141_34740   | [full]   | 1233  | No | NA | 0  | 0 | Not-determined | Genome-fragment | NA | 2.86  | 0 |
| S5-final-viral-combined_k141_124337  | [full]   | 1996  | No | NA | 0  | 1 | Not-determined | Genome-fragment | NA | 0     | 0 |
| S12-final-viral-combined_k141_268315 | [full]   | 1715  | No | NA | 2  | 0 | Low-quality    | Genome-fragment | NA | 0     | 0 |
| S12-final-viral-combined_k141_154821 | [full]   | 1715  | No | NA | 0  | 0 | Low-quality    | Genome-fragment | NA | 0     | 0 |
| S12-final-viral-combined_k141_93777  | [H2gene] | 1715  | No | NA | 1  | 0 | Low-quality    | Genome-fragment | NA | 0     | 0 |
| S5-final-viral-combined_k141_70215   | [full]   | 2213  | No | NA | 0  | 0 | Not-determined | Genome-fragment | NA | 0     | 0 |
| S5-final-viral-combined_k141_153297  | [full]   | 1996  | No | NA | 0  | 0 | Not-determined | Genome-fragment | NA | 0     | 0 |
| S5-final-viral-combined_k141_106759  | [full]   | 3032  | No | NA | 0  | 2 | Not-determined | Genome-fragment | NA | 0     | 0 |
| S2-final-viral-combined_k141_105794  | [full]   | 1715  | No | NA | 0  | 2 | Low-quality    | Genome-fragment | NA | 0     | 0 |
| S6-final-viral-combined_k141_99161   | [full]   | 1715  | No | NA | 0  | 1 | Low-quality    | Genome-fragment | NA | 0     | 0 |
| S5-final-viral-combined_k141_97497   | [full]   | 1707  | No | NA | 0  | 2 | Not-determined | Genome-fragment | NA | 0     | 0 |
| S8-final-viral-combined_k141_246908  | [full]   | 1715  | No | NA | 0  | 0 | Low-quality    | Genome-fragment | NA | 0     | 0 |
| S1-final-viral-combined_k141_217058  | [full]   | 1716  | No | NA | 2  | 0 | Low-quality    | Genome-fragment | NA | 0     | 0 |
| S1-final-viral-combined_k141_203216  | [full]   | 1716  | No | NA | 2  | 0 | Low-quality    | Genome-fragment | NA | 0     | 0 |
| S5-final-viral-combined_k141_61730   | [full]   | 1596  | No | NA | 0  | 0 | Not-determined | Genome-fragment | NA | 0     | 0 |
| S7-final-viral-combined_k141_22618   | [full]   | 1716  | No | NA | 2  | 0 | Low-quality    | Genome-fragment | NA | 0     | 0 |
| S12-final-viral-combined_k141_89089  | [full]   | 1716  | No | NA | 0  | 0 | Low-quality    | Genome-fragment | NA | 0     | 0 |
| S5-final-viral-combined_k141_133518  | [full]   | 10021 | No | NA | 1  | 4 | Not-determined | Genome-fragment | NA | 0     | 0 |
| S12-final-viral-combined_k141_232106 | [full]   | 1716  | No | NA | 1  | 0 | Low-quality    | Genome-fragment | NA | 0     | 0 |
| S5-final-viral-combined_k141_150977  | [full]   | 2211  | No | NA | 0  | 0 | Not-determined | Genome-fragment | NA | 0     | 0 |
| S2-final-viral-combined_k141_116376  | [full]   | 1716  | No | NA | 4  | 0 | Low-quality    | Genome-fragment | NA | 0     | 0 |
| S5-final-viral-combined_k141_150995  | [full]   | 2149  | No | NA | 0  | 1 | Not-determined | Genome-fragment | NA | 0     | 0 |
| S5-final-viral-combined_k141_150999  | [full]   | 1870  | No | NA | 0  | 0 | Not-determined | Genome-fragment | NA | 0     | 0 |
| S2_k141_57825                        |          | 1716  | No | NA | 0  | 0 | Low-quality    | Genome-fragment | NA | 3.55  | 0 |
| S4-final-viral-combined_k141_88092   | [full]   | 1716  | No | NA | 0  | 0 | Low-quality    | Genome-fragment | NA | 4.11  | 0 |
| S8-final-viral-combined_k141_187671  | [full]   | 1716  | No | NA | 0  | 1 | Low-quality    | Genome-fragment | NA | 3.97  | 0 |
| S5-final-viral-combined_k141_168640  | [full]   | 4624  | No | NA | 0  | 0 | Not-determined | Genome-fragment | NA | 0     | 0 |
| S5-final-viral-combined_k141_13651   | [full]   | 1245  | No | NA | 0  | 0 | Not-determined | Genome-fragment | NA | 0     | 0 |
| S8-final-viral-combined_k141_218454  | [full]   | 1716  | No | NA | 2  | 0 | Low-quality    | Genome-fragment | NA | 3.14  | 0 |
| S5-final-viral-combined_k141_70295   | [full]   | 1778  | No | NA | 0  | 1 | Not-determined | Genome-fragment | NA | 0     | 0 |
| S5-final-viral-combined_k141_97636   | [full]   | 1699  | No | NA | 0  | 1 | Not-determined | Genome-fragment | NA | 0     | 0 |
| S5-final-viral-combined_k141_97645   | [full]   | 3193  | No | NA | 0  | 3 | Not-determined | Genome-fragment | NA | 0     | 0 |
| S8-final-viral-combined_k141_11919   | [full]   | 1717  | No | NA | 0  | 0 | Low-quality    | Genome-fragment | NA | 3.5   | 0 |
| S11_k141_197710                      |          | 1717  | No | NA | 0  | 0 | Low-quality    | Genome-fragment | NA | 4.07  | 0 |
| S1_k141_171493                       |          | 1717  | No | NA | 0  | 0 | Low-quality    | Genome-fragment | NA | 1.11  | 0 |
| S5-final-viral-combined_k141_198947  | [full]   | 1717  | No | NA | 0  | 0 | Low-quality    | Genome-fragment | NA | 2.21  | 0 |
| S5-final-viral-combined_k141_97714   | [full]   | 1810  | No | NA | 0  | 0 | Not-determined | Genome-fragment | NA | 0     | 0 |
| S5-final-viral-combined_k141_70355   | [full]   | 9294  | No | NA | 0  | 4 | Not-determined | Genome-fragment | NA | 0     | 0 |
| S5-final-viral-combined_k141_50868   | [full]   | 1717  | No | NA | 1  | 0 | Low-quality    | Genome-fragment | NA | 3.66  | 0 |
| S17-final-viral-combined_k141_58847  | [full]   | 1717  | No | NA | 2  | 1 | Low-quality    | Genome-fragment | NA | 1.09  | 0 |
| S5-final-viral-combined_k141_61973   | [full]   | 1900  | No | NA | 0  | 2 | Not-determined | Genome-fragment | NA | 0     | 0 |
| S5-final-viral-combined_k141_124605  | [full]   | 1525  | No | NA | 0  | 2 | Not-determined | Genome-fragment | NA | 0     | 0 |
| S17-final-viral-combined_k141_87734  | [full]   | 1717  | No | NA | 0  | 1 | Low-quality    | Genome-fragment | NA | 2.33  | 0 |
| S5-final-viral-combined_k141_168751  | [full]   | 3645  | No | NA | 0  | 0 | Not-determined | Genome-fragment | NA | 0     | 0 |
| S4_k141_67375                        |          | 1717  | No | NA | 0  | 1 | Low-quality    | Genome-fragment | NA | 2.84  | 0 |
| S5-final-viral-combined_k141_115201  | [full]   | 4190  | No | NA | 0  | 1 | Not-determined | Genome-fragment | NA | 0     | 0 |
| S5-final-viral-combined_k141_43717   | [full]   | 3566  | No | NA | 0  | 1 | Not-determined | Genome-fragment | NA | 0     | 0 |
| S3-final-viral-combined_k141_27682   | [full]   | 1718  | No | NA | 1  | 0 | Low-quality    | Genome-fragment | NA | 1.14  | 0 |
| S3-final-viral-combined_k141_29692   | [H2gene] | 1718  | No | NA | 2  | 0 | Low-quality    | Genome-fragment | NA | 2.49  | 0 |
| S17-k141_29912                       |          | 1718  | No | NA | 0  | 0 | Low-quality    | Genome-fragment | NA | 3.29  | 0 |
| S5-final-viral-combined_k141_213099  | [full]   | 5585  | No | NA | 0  | 4 | Not-determined | Genome-fragment | NA | 0     | 0 |
| S5-final-viral-combined_k141_186775  | [full]   | 4932  | No | NA | 0  | 0 | Not-determined | Genome-fragment | NA | 0     | 0 |
| S5-final-viral-combined_k141_177929  | [full]   | 2372  | No | NA | 0  | 1 | Not-determined | Genome-fragment | NA | 0     | 0 |
| S5-final-viral-combined_k141_43740   | [full]   | 2937  | No | NA | 0  | 0 | Not-determined | Genome-fragment | NA | 0     | 0 |
| S5-final-viral-combined_k141_43778   | [full]   | 2111  | No | NA | 0  | 1 | Not-determined | Genome-fragment | NA | 0     | 0 |
| S12-final-viral-combined_k141_155524 | [full]   | 1718  | No | NA | 0  | 0 | Low-quality    | Genome-fragment | NA | 4.46  | 0 |
| S12_k141_27344                       |          | 1718  | No | NA | 0  | 1 | Low-quality    | Genome-fragment | NA | 2.85  | 0 |



|                                      |             |       |     |       |    |    |                |                 |       |       |
|--------------------------------------|-------------|-------|-----|-------|----|----|----------------|-----------------|-------|-------|
| S7-final-viral-combined_k141_68860   | [full]      | 1721  | No  | NA    | 0  | 1  | Low-quality    | Genome-fragment | 1.08  | 0     |
| S17-final-viral-combined_k141_8901   | [full]      | 1721  | No  | NA    | 0  | 0  | Low-quality    | Genome-fragment | 4.21  | 0     |
| S11-final-viral-combined_k141_317505 | [full]      | 1722  | No  | NA    | 0  | 2  | Low-quality    | Genome-fragment | 1.65  | 0     |
| S11-final-viral-combined_k141_107940 | [full]      | 1722  | No  | NA    | 0  | 2  | Low-quality    | Genome-fragment | 0.89  | 0     |
| S1_k141_27577                        |             | 1722  | No  | NA    | 0  | 1  | Low-quality    | Genome-fragment | 1.54  | 0     |
| S5-final-viral-combined_k141_17673   | [full]      | 1598  | No  | NA    | 0  | 1  | Not-determined | Genome-fragment | NA    | 0     |
| S5-final-viral-combined_k141_25709   | [full]      | 1004  | No  | NA    | 0  | 0  | Not-determined | Genome-fragment | NA    | 0     |
| S5-final-viral-combined_k141_17682   | [full]      | 2615  | No  | NA    | 0  | 4  | Not-determined | Genome-fragment | NA    | 0     |
| S5-final-viral-combined_k141_115178  | [full]      | 1206  | No  | NA    | 0  | 1  | Not-determined | Genome-fragment | NA    | 0     |
| S5-final-viral-combined_k141_142492  | [full]      | 1592  | No  | NA    | 0  | 0  | Not-determined | Genome-fragment | NA    | 0     |
| S3_k141_69993                        |             | 1722  | No  | NA    | 1  | 0  | Low-quality    | Genome-fragment | 4.08  | 0     |
| S5-final-viral-combined_k141_35552   | [full]      | 22727 | No  | NA    | 0  | 4  | Not-determined | Genome-fragment | NA    | 0     |
| S5-final-viral-combined_k141_23882   | [full]      | 1722  | No  | NA    | 0  | 1  | Low-quality    | Genome-fragment | 0.9   | 0     |
| S5-final-viral-combined_k141_25766   | [full]      | 5291  | No  | NA    | 0  | 4  | Not-determined | Genome-fragment | NA    | 0     |
| S5-final-viral-combined_k141_142512  | [full]      | 1937  | No  | NA    | 0  | 1  | Not-determined | Genome-fragment | NA    | 0     |
| S5-final-viral-combined_k141_25798   | [full]      | 1099  | No  | NA    | 0  | 2  | Not-determined | Genome-fragment | NA    | 0     |
| S5-final-viral-combined_k141_44187   | [full]      | 1883  | No  | NA    | 0  | 1  | Not-determined | Genome-fragment | NA    | 0     |
| S5-final-viral-combined_k141_44191   | [full]      | 1454  | No  | NA    | 0  | 1  | Not-determined | Genome-fragment | NA    | 0     |
| S5-final-viral-combined_k141_115161  | [full]      | 1724  | No  | NA    | 0  | 1  | Not-determined | Genome-fragment | NA    | 0     |
| S5-final-viral-combined_k141_44193   | [full]      | 2220  | No  | NA    | 0  | 0  | Not-determined | Genome-fragment | NA    | 0     |
| S7_k141_121114                       |             | 1722  | No  | NA    | 0  | 0  | Low-quality    | Genome-fragment | 1.51  | 0     |
| S5-final-viral-combined_k141_44227   | [full]      | 7022  | No  | NA    | 0  | 3  | Not-determined | Genome-fragment | NA    | 0     |
| S5-final-viral-combined_k141_17788   | [full]      | 2876  | No  | NA    | 0  | 2  | Not-determined | Genome-fragment | NA    | 0     |
| S5-final-viral-combined_k141_204681  | [full]      | 2072  | No  | NA    | 0  | 2  | Not-determined | Genome-fragment | NA    | 0     |
| S5-final-viral-combined_k141_70908   | [full]      | 3904  | No  | NA    | 0  | 2  | Not-determined | Genome-fragment | NA    | 0     |
| S5-final-viral-combined_k141_204736  | [full]      | 2703  | No  | NA    | 0  | 2  | Not-determined | Genome-fragment | NA    | 0     |
| S12_k141_398392                      |             | 1722  | No  | NA    | 0  | 0  | Low-quality    | Genome-fragment | 1.24  | 0     |
| S5-final-viral-combined_k141_70940   | [full]      | 1162  | No  | NA    | 0  | 1  | Not-determined | Genome-fragment | NA    | 0     |
| S5-final-viral-combined_k141_204781  | [full]      | 36604 | No  | NA    | 0  | 1  | High-quality   | Genome-fragment | 97.09 | 0     |
| S5-final-viral-combined_k141_62347   | [full]      | 2274  | No  | NA    | 0  | 2  | Not-determined | Genome-fragment | NA    | 0     |
| S5-final-viral-combined_k141_26035   | [full]      | 3589  | No  | NA    | 0  | 3  | Not-determined | Genome-fragment | NA    | 0     |
| S5-final-viral-combined_k141_26038   | [full]      | 6763  | No  | NA    | 0  | 6  | Not-determined | Genome-fragment | NA    | 0     |
| S5-final-viral-combined_k141_204879  | [full]      | 1317  | No  | NA    | 0  | 0  | Not-determined | Genome-fragment | NA    | 0     |
| S5-final-viral-combined_k141_44405   | [full]      | 1284  | No  | NA    | 0  | 2  | Not-determined | Genome-fragment | NA    | 0     |
| S5-final-viral-combined_k141_71033   | [full]      | 1274  | No  | NA    | 0  | 2  | Not-determined | Genome-fragment | NA    | 0     |
| S5-final-viral-combined_k141_44411   | [full]      | 1546  | No  | NA    | 0  | 1  | Not-determined | Genome-fragment | NA    | 0     |
| S5-final-viral-combined_k141_71050   | [full]      | 4239  | No  | NA    | 0  | 0  | Not-determined | Genome-fragment | NA    | 0     |
| S5-final-viral-combined_k141_26120   | [full]      | 2096  | No  | NA    | 0  | 0  | Not-determined | Genome-fragment | NA    | 0     |
| S11-final-viral-combined_k141_181797 | [H2gene]    | 1723  | No  | NA    | 0  | 0  | Low-quality    | Genome-fragment | 1.8   | 0     |
| S5-final-viral-combined_k141_71212   | [full]      | 1388  | No  | NA    | 0  | 1  | Not-determined | Genome-fragment | NA    | 0     |
| S5-final-viral-combined_k141_71225   | [full]      | 2062  | No  | NA    | 0  | 2  | Not-determined | Genome-fragment | NA    | 0     |
| S5-final-viral-combined_k141_71249   | [full]      | 2983  | No  | NA    | 0  | 3  | Not-determined | Genome-fragment | NA    | 0     |
| S5-final-viral-combined_k141_71258   | [full]      | 1240  | No  | NA    | 0  | 2  | Not-determined | Genome-fragment | NA    | 0     |
| S11_k141_66588                       |             | 1723  | No  | NA    | 0  | 0  | Low-quality    | Genome-fragment | 0.93  | 0     |
| S5-final-viral-combined_k141_26419   | [full]      | 3802  | No  | NA    | 0  | 2  | Not-determined | Genome-fragment | NA    | 0     |
| S5-final-viral-combined_k141_26503   | [full]      | 4608  | No  | NA    | 0  | 4  | Not-determined | Genome-fragment | NA    | 0     |
| S5-final-viral-combined_k141_26531   | [full]      | 2925  | No  | NA    | 0  | 2  | Not-determined | Genome-fragment | NA    | 0     |
| S5-final-viral-combined_k141_26543   | [full]      | 2740  | No  | NA    | 0  | 1  | Not-determined | Genome-fragment | NA    | 0     |
| S1-final-viral-combined_k141_57130   | [full]      | 1723  | No  | NA    | 0  | 0  | Low-quality    | Genome-fragment | 3.35  | 0     |
| S5-final-viral-combined_k141_26647   | [full]      | 4137  | No  | NA    | 0  | 3  | Not-determined | Genome-fragment | NA    | 0     |
| S7-final-viral-combined_k141_43973   | [full]      | 1723  | No  | NA    | 4  | 0  | Low-quality    | Genome-fragment | 2.62  | 0     |
| S12-final-viral-combined_k141_270921 | [full]      | 1723  | No  | NA    | 1  | 0  | Low-quality    | Genome-fragment | 1.48  | 0     |
| S2-final-viral-combined_k141_187414  | [full]      | 1723  | No  | NA    | 0  | 0  | Low-quality    | Genome-fragment | 2.58  | 0     |
| S4-final-viral-combined_k141_67726   | [full]      | 1723  | No  | NA    | 1  | 0  | Low-quality    | Genome-fragment | NA    | 0     |
| S5-final-viral-combined_k141_196397  | [O_partial] | 22549 | No  | NA    | 2  | 0  | Not-determined | Genome-fragment | 3.6   | 0     |
| S9-final-viral-combined_k141_5571    | [full]      | 1724  | No  | NA    | 2  | 0  | Low-quality    | Genome-fragment | 84.14 | 62.68 |
| S5-final-viral-combined_k141_98202   | [O_partial] | 69467 | Yes | 50930 | 5  | 13 | Medium-quality | Genome-fragment | 100   | 26.85 |
| S5-final-viral-combined_k141_26971   | [O_partial] | 84424 | Yes | 51361 | 18 | 51 | Complete       | High-quality    | NA    | 0     |
| S5-final-viral-combined_k141_142878  | [O_partial] | 16880 | No  | NA    | 0  | 9  | Not-determined | Genome-fragment | 2.18  | 0     |
| S5-final-viral-combined_k141_154550  | [full]      | 1724  | No  | NA    | 1  | 0  | Low-quality    | Genome-fragment | 4.77  | 0     |
| S17-final-viral-combined_k141_246450 | [full]      | 1724  | No  | NA    | 1  | 0  | Low-quality    | Genome-fragment | 0.78  | 0     |
| S17_k141_152485                      |             | 1724  | No  | NA    | 0  | 2  | Low-quality    | Genome-fragment | NA    | 0     |
| S12-final-viral-combined_k141_249861 | [full]      | 17501 | No  | NA    | 0  | 4  | Not-determined | Genome-fragment | 60.59 | 0     |
| S5-final-viral-combined_k141_27036   | [O_partial] | 50469 | No  | NA    | 12 | 0  | Medium-quality | Genome-fragment | 3.27  | 0     |
| S5-final-viral-combined_k141_178432  | [O_partial] | 1724  | No  | NA    | 0  | 0  | Low-quality    | Genome-fragment | 67.37 | 22.24 |
| S12_k141_329270                      |             | 1724  | No  | NA    | 0  | 7  | Medium-quality | Genome-fragment | NA    | 0     |
| S5-final-viral-combined_k141_179241  | [O_partial] | 36095 | Yes | 28068 | 3  | 12 | Not-determined | Genome-fragment | 3.53  | 0     |
| S5-final-viral-combined_k141_181489  | [O_partial] | 20631 | No  | NA    | 0  | 7  | Not-determined | Genome-fragment | 99.25 | 51.39 |
| S9-final-viral-combined_k141_77032   | [full]      | 1725  | No  | NA    | 1  | 0  | Low-quality    | Genome-fragment | 4.19  | 0     |
| S5-final-viral-combined_k141_17412   | [full]      | 17412 | No  | NA    | 0  | 1  | Low-quality    | Genome-fragment | 3.72  | 0     |
| S5-final-viral-combined_k141_117131  | [O_partial] | 72200 | Yes | 35094 | 23 | 22 | High-quality   | High-quality    | 1.71  | 0     |
| S11-final-viral-combined_k141_157001 | [full]      | 1725  | No  | NA    | 0  | 3  | Low-quality    | Genome-fragment | 0.38  | 0     |
| S5-final-viral-combined_k141_36669   | [full]      | 1725  | No  | NA    | 0  | 0  | Low-quality    | Genome-fragment | 2.66  | 0     |
| S5-final-viral-combined_k141_51109   | [full]      | 1725  | No  | NA    | 1  | 0  | Low-quality    | Genome-fragment | 3.28  | 0     |
| S7_k141_13210                        |             | 1725  | No  | NA    | 0  | 0  | Low-quality    | Genome-fragment | 0.15  | 0     |
| S12-final-viral-combined_k141_155097 | [full]      | 1725  | No  | NA    | 0  | 3  | Low-quality    | Genome-fragment | 4.05  | 0     |
| S12-final-viral-combined_k141_199065 | [full]      | 1726  | No  | NA    | 0  | 1  | Low-quality    | Genome-fragment | 1.08  | 0     |
| S9-final-viral-combined_k141_17967   | [full]      | 1726  | No  | NA    | 0  | 0  | Low-quality    | Genome-fragment | 5.28  | 0     |
| S11-final-viral-combined_k141_231561 | [full]      | 1726  | No  | NA    | 0  | 1  | Low-quality    | Genome-fragment | 4.16  | 0     |
| S5-final-viral-combined_k141_19663   | [O_partial] | 12851 | No  | NA    | 0  | 2  | Not-determined | Genome-fragment | 100   | 33.74 |
| S5-final-viral-combined_k141_162433  | [O_partial] | 10611 | No  | NA    | 0  | 1  | Not-determined | Genome-fragment | NA    | 0     |
| S1_k141_258005                       |             | 1726  | No  | NA    | 0  | 1  | Low-quality    | Genome-fragment | 0.409 | 0     |
| S17-final-viral-combined_k141_112050 | [full]      | 1726  | No  | NA    | 0  | 0  | Low-quality    | Genome-fragment | 54.11 | 0     |
| S9-final-viral-combined_k141_49931   | [full]      | 1727  | No  | NA    | 0  | 9  | Medium-quality | Genome-fragment | 4.4   | 0     |
| S11-final-viral-combined_k141_49931  | [full]      | 1727  | No  | NA    | 0  | 2  | Not-determined | Genome-fragment | 2.7   | 0     |
| S5-final-viral-combined_k141_207323  | [O_partial] | 14551 | No  | NA    | 0  | 13 | Not-determined | Genome-fragment | 2.92  | 26.68 |
| S1-final-viral-combined_k141_268709  | [full]      | 1727  | No  | NA    | 1  | 0  | Low-quality    | Genome-fragment | 0.48  | 0     |
| S5-final-viral-combined_k141_163365  | [O_partial] | 32777 | Yes | 21719 | 2  | 6  | High-quality   | High-quality    | 2.7   | 0     |
| S5-final-viral-combined_k141_172874  | [O_partial] | 21425 | No  | NA    | 0  | 7  | Not-determined | Genome-fragment | 95.35 | 0     |
| S5-final-viral-combined_k141_92221   | [O_partial] | 15119 | No  | NA    | 0  | 5  | Not-determined | Genome-fragment | 0.8   | 0     |
| S5-final-viral-combined_k141_48351   | [O_partial] | 16607 | No  | NA    | 0  | 5  | Not-determined | Genome-fragment | 1.03  | 0     |
| S3-final-viral-combined_k141_99349   | [full]      | 1727  | No  | NA    | 0  | 1  | Low-quality    | Genome-fragment | 0.39  | 0     |
| S3-final-viral-combined_k141_42521   | [full]      | 1727  | No  | NA    | 0  | 1  | Low-quality    | Genome-fragment | 1.03  | 0     |
| S5-final-viral-combined_k141_19198   | [O_partial] | 14012 | No  | NA    | 0  | 6  | Not-determined | Genome-fragment | NA    | 0     |
| S5-final-viral-combined_k141_17310   | [full]      | 1727  | No  | NA    | 0  | 0  | Low-quality    | Genome-fragment | 5.11  | 0     |
| S7-final-viral-combined_k141_188756  | [full]      | 1727  | No  | NA    | 0  | 0  | Low-quality    | Genome-fragment | 2.45  | 0     |
| S7-final-viral-combined_k141_160513  | [full]      | 1727  | No  | NA    | 1  | 0  | Low-quality    | Genome-fragment | 1.24  | 0     |
| S2-final-viral-combined_k141_209057  | [full]      | 1727  | No  | NA    | 0  | 0  | Low-quality    | Genome-fragment | 2.88  | 0     |
| S5-final-viral-combined_k141_173869  | [O_partial] | 1423  | No  | NA    | 0  | 2  | Not-determined | Genome-fragment | NA    | 0     |
| S5-final-viral-combined_k141_155356  | [O_partial] | 16477 | No  | NA    | 0  | 2  | Not-determined | Genome-fragment | NA    | 0     |
| S5-final-viral-combined_k141_20731   | [O_partial] | 14679 | No  | NA    | 0  | 4  | Not-determined | Genome-fragment | NA    | 0     |
| S5-final-viral-combined_k141_197910  | [O_partial] | 2642  | No  | NA    | 0  | 1  | High-quality   | Genome-fragment | 95.35 | 0     |
| S8-final-viral-combined_k141_82373   | [full]      | 1727  | No  | NA    | 0  | 2  | Low-quality    | Genome-fragment | 0.48  | 0     |
| S8-final-viral-combined_k141_16540   | [full]      | 1727  | No  | NA    | 0  | 0  | Low-quality    | Genome-fragment | 2.7   | 0     |
| S1-final-viral-combined_k141_198656  | [full]      | 1728  | Yes | 1267  | 1  | 1  | Low-quality    | Genome-fragment | 2.92  | 26.68 |
| S5-final-viral-combined_k141_21581   | [O_partial] | 10935 | No  | NA    | 0  | 6  | Not-determined | Genome-fragment | NA    | 0     |
| S1-final-viral-combined_k141_35541   | [full]      | 1728  | No  | NA    | 1  | 0  | Low-quality    | Genome-fragment | 4.09  | 0     |
| S5-final-viral-combined_k141_18313   | [O_partial] | 29249 | No  | NA    | 2  | 9  | Medium-quality | Genome-fragment | NA    | 0     |
| S5-final-viral-combined_k141_200931  | [O_partial] | 11592 | No  | NA    | 0  | 2  | Low-quality    | Genome-fragment | 4.4   | 0     |
| S1_k141_180956                       |             | 1728  | No  | NA    | 0  | 2  | Not-determined | Genome-fragment | 2.7   | 0     |
| S5-final-viral-combined_k141_156233  | [O_partial] | 19979 | No  | NA    | 0  | 2  | Not-determined | Genome-fragment | NA    | 0     |
| S3-final-viral-combined_k141_28652   | [full]      | 1728  | No  | NA    | 0  | 7  | Not-determined | Genome-fragment | NA    | 0     |
| S5-final-viral-combined_k141_67335   | [O_partial] | 19822 | No  | NA    | 0  | 7  | Not-determined | Genome-fragment | NA    | 0     |
| S5-final-viral-combined_k141_112407  | [O_partial] | 13968 | No  | NA    | 0  | 8  | Not-determined | Genome-fragment | NA    | 0     |
| S5-final-viral-combined_k141_130617  | [O_partial] | 24563 | No  | NA    | 0  | 2  | Not-determined | Genome-fragment | NA    | 0     |
| S7-final-viral-combined_k141_51126   | [full]      | 1728  | No  | NA    | 0  | 0  | Low-quality    | Genome-fragment | 2.96  | 0     |
| S7-final-viral-combined_k141_117675  | [full]      | 1728  | No  | NA    | 0  | 1  | Low-quality    | Genome-fragment | 1.67  | 0     |
| S7-final-viral-combined_k141_106869  | [full]      | 1728  | No  | NA    | 0  | 0  | Low-quality    | Genome-fragment | 4.11  | 0     |
| S5-final-viral-combined_k141_150272  | [O_partial] | 21064 | No  | NA    | 0  | 12 | Not-determined | Genome-fragment | NA    | 0     |
| S5-final-viral-combined_k141_193422  | [O_partial] | 18360 | No  | NA    | 0  | 6  | Not-determined | Genome-fragment | NA    | 0     |
| S2-final-viral-combined_k141_187621  | [full]      | 1728  | No  | NA    | 0  | 0  | Low-quality    | Genome-fragment | 3.34  | 0     |
| S9-final-viral-combined_k141_55863   | [full]      | 1729  | No  | NA    | 0  | 2  | Low-quality    | Genome-fragment | 0.6   | 0     |
| S7_k141_226673                       |             | 1729  | No  | NA    | 0  | 1  | Low-quality    | Genome-fragment | 3.44  | 0     |
| S2-final-viral-combined_k141_110346  | [full]      | 1729  | No  | NA    | 0  | 2  | Low-quality    | Genome-fragment | 3.23  | 0     |
| S5-final-viral-combined_k141_194446  | [O_partial] | 11311 | No  | NA    | 0  | 4  | Not-determined | Genome-fragment | NA    | 0     |
| S6-final-viral-combined_k141_841     | [full]      | 1729  | No  | NA    | 0  | 0  | Low-quality    | Genome-fragment | 1.59  | 0     |
| S5-final-viral-combined_k141_211849  | [O_partial] | 17614 | No  | NA    | 0  | 13 | Not-determined | Genome-fragment | NA    | 0     |
| S5-final-viral-combined_k141_42829   | [O_partial] | 1568  | No  | NA    | 0  | 2  | Not-determined | Genome-fragment | NA    | 0     |
| S8-final-viral-combined_k141_235031  | [full]      | 1729  | No  | NA    | 1  | 0  | Low-quality    |                 |       |       |



|                                      |          |      |     |      |   |   |                |                 |      |       |
|--------------------------------------|----------|------|-----|------|---|---|----------------|-----------------|------|-------|
| 55-final-viral-combined_k141_188612  | [H]2gene | 1681 | No  | NA   | 0 | 1 | Not-determined | Genome-fragment | NA   | 0     |
| 55-final-viral-combined_k141_171281  | [H]2gene | 1501 | No  | NA   | 0 | 0 | Not-determined | Genome-fragment | NA   | 0     |
| 55-final-viral-combined_k141_117291  | [H]2gene | 1213 | No  | NA   | 0 | 0 | Not-determined | Genome-fragment | NA   | 0     |
| 57-final-viral-combined_k141_144551  | [Full]   | 1734 | No  | NA   | 1 | 0 | Low-quality    | Genome-fragment | 3.77 | 0     |
| 57-final-viral-combined_k141_184781  | [Full]   | 1734 | No  | NA   | 2 | 0 | Low-quality    | Genome-fragment | 4.29 | 0     |
| 517-final-viral-combined_k141_201078 | [Full]   | 1734 | No  | NA   | 0 | 2 | Low-quality    | Genome-fragment | 0.44 | 0     |
| 512-final-viral-combined_k141_385023 | [Full]   | 1734 | No  | NA   | 0 | 0 | Low-quality    | Genome-fragment | 3.78 | 0     |
| 52-final-viral-combined_k141_217671  | [Full]   | 1734 | No  | NA   | 0 | 0 | Low-quality    | Genome-fragment | 3.14 | 0     |
| 511-final-viral-combined_k141_574291 | [Full]   | 1735 | No  | NA   | 0 | 0 | Low-quality    | Genome-fragment | 4.32 | 0     |
| 55-final-viral-combined_k141_171624  | [H]2gene | 1122 | No  | NA   | 1 | 0 | Not-determined | Genome-fragment | NA   | 0     |
| 511-final-viral-combined_k141_211701 | [Full]   | 1735 | No  | NA   | 0 | 2 | Low-quality    | Genome-fragment | 2.83 | 0     |
| 55-final-viral-combined_k141_108718  | [H]2gene | 1428 | No  | NA   | 0 | 0 | Not-determined | Genome-fragment | NA   | 0     |
| 511-final-viral-combined_k141_327508 | [Full]   | 1735 | No  | NA   | 0 | 2 | Low-quality    | Genome-fragment | 0.41 | 0     |
| 57-final-viral-combined_k141_144289  | [Full]   | 1735 | No  | NA   | 1 | 0 | Low-quality    | Genome-fragment | 4.46 | 0     |
| 57-final-viral-combined_k141_140116  | [Full]   | 1735 | No  | NA   | 0 | 3 | Low-quality    | Genome-fragment | 2.45 | 0     |
| 55-final-viral-combined_k141_468641  | [H]2gene | 1462 | No  | NA   | 0 | 0 | Not-determined | Genome-fragment | NA   | 0     |
| 517-final-viral-combined_k141_100917 | [Full]   | 1735 | No  | NA   | 0 | 2 | Low-quality    | Genome-fragment | 3.19 | 0     |
| 517-final-viral-combined_k141_124750 | [Full]   | 1735 | No  | NA   | 0 | 2 | Low-quality    | Genome-fragment | 1.23 | 0     |
| 517-final-viral-combined_k141_138428 | [Full]   | 1735 | No  | NA   | 0 | 0 | Low-quality    | Genome-fragment | 2.71 | 0     |
| 58-final-viral-combined_k141_188266  | [Full]   | 1735 | No  | NA   | 2 | 0 | Low-quality    | Genome-fragment | 2.78 | 0     |
| 55-final-viral-combined_k141_145079  | [H]2gene | 1722 | No  | NA   | 0 | 0 | Not-determined | Genome-fragment | NA   | 0     |
| 58_k141_111809                       |          | 1735 | No  | NA   | 1 | 0 | Low-quality    | Genome-fragment | 0.56 | 0     |
| 51-final-viral-combined_k141_122069  | [Full]   | 1736 | No  | NA   | 1 | 0 | Low-quality    | Genome-fragment | 2.15 | 0     |
| 51-final-viral-combined_k141_63925   | [Full]   | 1736 | No  | NA   | 0 | 1 | Low-quality    | Genome-fragment | 1.05 | 0     |
| 51_k141_240105                       |          | 1736 | No  | NA   | 0 | 1 | Low-quality    | Genome-fragment | 2.95 | 0     |
| 55-final-viral-combined_k141_172368  | [H]2gene | 1466 | No  | NA   | 0 | 0 | Not-determined | Genome-fragment | NA   | 0     |
| 55-final-viral-combined_k141_187857  | [H]2gene | 1736 | No  | NA   | 1 | 0 | Low-quality    | Genome-fragment | 4.11 | 0     |
| 52-final-viral-combined_k141_27941   | [Full]   | 1736 | No  | NA   | 1 | 0 | Low-quality    | Genome-fragment | 2.94 | 0     |
| 52-final-viral-combined_k141_143729  | [Full]   | 1736 | No  | NA   | 0 | 1 | Low-quality    | Genome-fragment | 1.19 | 0     |
| 52_k141_196551                       |          | 1736 | No  | NA   | 0 | 2 | Low-quality    | Genome-fragment | 2.02 | 0     |
| 54-final-viral-combined_k141_141582  | [Full]   | 1736 | No  | NA   | 0 | 0 | Low-quality    | Genome-fragment | 3.08 | 0     |
| 55-final-viral-combined_k141_127601  | [H]2gene | 1213 | No  | NA   | 0 | 0 | Not-determined | Genome-fragment | NA   | 0     |
| 55-final-viral-combined_k141_47596   | [H]2gene | 1822 | No  | NA   | 0 | 2 | Not-determined | Genome-fragment | NA   | 0     |
| 58-final-viral-combined_k141_94595   | [Full]   | 1736 | No  | NA   | 0 | 0 | Low-quality    | Genome-fragment | 1.13 | 0     |
| 58-final-viral-combined_k141_87578   | [Full]   | 1736 | No  | NA   | 1 | 0 | Low-quality    | Genome-fragment | 3.44 | 0     |
| 511-final-viral-combined_k141_151833 | [Full]   | 1737 | No  | NA   | 0 | 1 | Low-quality    | Genome-fragment | 3.78 | 0     |
| 511-final-viral-combined_k141_270585 | [Full]   | 1737 | No  | NA   | 0 | 0 | Low-quality    | Genome-fragment | 2.72 | 0     |
| 51-final-viral-combined_k141_182040  | [Full]   | 1737 | No  | NA   | 0 | 0 | Low-quality    | Genome-fragment | 3.94 | 0     |
| 55-final-viral-combined_k141_74184   | [H]2gene | 1474 | No  | NA   | 0 | 0 | Not-determined | Genome-fragment | NA   | 0     |
| 51-final-viral-combined_k141_388554  | [Full]   | 1737 | No  | NA   | 0 | 0 | Low-quality    | Genome-fragment | 2.1  | 0     |
| 53-final-viral-combined_k141_113265  | [Full]   | 1737 | No  | NA   | 0 | 1 | Low-quality    | Genome-fragment | 0.94 | 0     |
| 52_k141_47214                        |          | 1737 | No  | NA   | 1 | 0 | Low-quality    | Genome-fragment | 3.98 | 0     |
| 517-final-viral-combined_k141_127400 | [Full]   | 1737 | No  | NA   | 0 | 0 | Low-quality    | Genome-fragment | 2.13 | 0     |
| 55-final-viral-combined_k141_82896   | [H]2gene | 1096 | No  | NA   | 0 | 0 | Not-determined | Genome-fragment | NA   | 0     |
| 52-final-viral-combined_k141_98229   | [Full]   | 1737 | No  | NA   | 0 | 2 | Low-quality    | Genome-fragment | 2.01 | 0     |
| 52-final-viral-combined_k141_87741   | [Full]   | 1737 | No  | NA   | 0 | 0 | Low-quality    | Genome-fragment | 2.73 | 0     |
| 511-final-viral-combined_k141_209033 | [Full]   | 1738 | No  | NA   | 0 | 1 | Low-quality    | Genome-fragment | 0.94 | 0     |
| 511-final-viral-combined_k141_176229 | [Full]   | 1738 | No  | NA   | 0 | 0 | Low-quality    | Genome-fragment | 3.87 | 0     |
| 51-final-viral-combined_k141_68994   | [Full]   | 1738 | No  | NA   | 0 | 2 | Low-quality    | Genome-fragment | 0.9  | 0     |
| 51-final-viral-combined_k141_122063  | [Full]   | 1738 | Yes | 1027 | 1 | 1 | Low-quality    | Genome-fragment | 1.73 | 40.91 |
| 55-final-viral-combined_k141_163665  | [H]2gene | 1044 | No  | NA   | 0 | 0 | Not-determined | Genome-fragment | NA   | 0     |
| 55-final-viral-combined_k141_29676   | [H]2gene | 2444 | No  | NA   | 0 | 0 | Not-determined | Genome-fragment | NA   | 0     |
| 57-final-viral-combined_k141_33219   | [Full]   | 1738 | No  | NA   | 0 | 1 | Low-quality    | Genome-fragment | 1.65 | 0     |
| 57-final-viral-combined_k141_104839  | [Full]   | 1738 | No  | NA   | 2 | 0 | Low-quality    | Genome-fragment | 4.01 | 0     |
| 55-final-viral-combined_k141_121541  | [H]2gene | 1350 | No  | NA   | 0 | 0 | Not-determined | Genome-fragment | NA   | 0     |
| 512-final-viral-combined_k141_205402 | [Full]   | 1738 | No  | NA   | 0 | 0 | Low-quality    | Genome-fragment | 3    | 0     |
| 52-final-viral-combined_k141_47102   | [Full]   | 1738 | No  | NA   | 0 | 1 | Low-quality    | Genome-fragment | 0.8  | 0     |
| 55-final-viral-combined_k141_146545  | [H]2gene | 1754 | No  | NA   | 0 | 0 | Not-determined | Genome-fragment | NA   | 0     |
| 56_k141_83090                        |          | 1738 | No  | NA   | 0 | 0 | Low-quality    | Genome-fragment | 1.84 | 0     |
| 58-final-viral-combined_k141_243927  | [Full]   | 1738 | No  | NA   | 0 | 0 | Low-quality    | Genome-fragment | 4.1  | 0     |
| 59-final-viral-combined_k141_43540   | [Full]   | 1739 | No  | NA   | 1 | 0 | Low-quality    | Genome-fragment | 2.83 | 0     |
| 511-final-viral-combined_k141_114057 | [Full]   | 1739 | No  | NA   | 0 | 0 | Low-quality    | Genome-fragment | 4.68 | 0     |
| 55-final-viral-combined_k141_119474  | [H]2gene | 1138 | No  | NA   | 0 | 1 | Not-determined | Genome-fragment | NA   | 0     |
| 511-final-viral-combined_k141_76364  | [Full]   | 1739 | No  | NA   | 0 | 1 | Low-quality    | Genome-fragment | 2.26 | 0     |
| 51-final-viral-combined_k141_19306   | [Full]   | 1739 | No  | NA   | 2 | 0 | Low-quality    | Genome-fragment | 2.88 | 0     |
| 51_k141_393605                       |          | 1739 | No  | NA   | 0 | 1 | Low-quality    | Genome-fragment | 2.1  | 0     |
| 55-final-viral-combined_k141_174359  | [Full]   | 1739 | No  | NA   | 1 | 0 | Low-quality    | Genome-fragment | 4.29 | 0     |
| 57-final-viral-combined_k141_107195  | [Full]   | 1739 | No  | NA   | 0 | 1 | Low-quality    | Genome-fragment | 2.71 | 0     |
| 517-final-viral-combined_k141_230764 | [Full]   | 1739 | No  | NA   | 0 | 0 | Low-quality    | Genome-fragment | 0.99 | 0     |
| 517_k141_134084                      |          | 1739 | No  | NA   | 0 | 2 | Low-quality    | Genome-fragment | 0.46 | 0     |
| 512-final-viral-combined_k141_91452  | [Full]   | 1739 | No  | NA   | 0 | 0 | Low-quality    | Genome-fragment | 1.57 | 0     |
| 512-final-viral-combined_k141_359189 | [Full]   | 1739 | No  | NA   | 0 | 2 | Low-quality    | Genome-fragment | 0.7  | 0     |
| 54_k141_112142                       |          | 1739 | No  | NA   | 0 | 1 | Low-quality    | Genome-fragment | 2.73 | 0     |
| 55-final-viral-combined_k141_57571   | [H]2gene | 1071 | No  | NA   | 0 | 0 | Not-determined | Genome-fragment | NA   | 0     |
| 55-final-viral-combined_k141_58571   | [H]2gene | 1183 | No  | NA   | 0 | 0 | Not-determined | Genome-fragment | NA   | 0     |
| 56-final-viral-combined_k141_85453   | [Full]   | 1739 | No  | NA   | 0 | 1 | Low-quality    | Genome-fragment | 2.85 | 0     |
| 55-final-viral-combined_k141_174322  | [H]2gene | 1476 | No  | NA   | 0 | 2 | Not-determined | Genome-fragment | NA   | 0     |
| 56_k141_83530                        |          | 1739 | No  | NA   | 0 | 3 | Low-quality    | Genome-fragment | 1.27 | 0     |
| 58-final-viral-combined_k141_219544  | [Full]   | 1739 | No  | NA   | 0 | 1 | Low-quality    | Genome-fragment | 0    | 4.11  |
| 55-final-viral-combined_k141_120239  | [H]2gene | 1001 | No  | NA   | 0 | 0 | Not-determined | Genome-fragment | NA   | 0     |
| 55-final-viral-combined_k141_49365   | [H]2gene | 1600 | No  | NA   | 0 | 1 | Not-determined | Genome-fragment | NA   | 0     |
| 55-final-viral-combined_k141_156085  | [H]2gene | 1444 | No  | NA   | 0 | 0 | Not-determined | Genome-fragment | NA   | 0     |
| 58-final-viral-combined_k141_175110  | [Full]   | 1739 | No  | NA   | 0 | 2 | Low-quality    | Genome-fragment | 2.07 | 0     |
| 511-final-viral-combined_k141_62375  | [Full]   | 1740 | No  | NA   | 1 | 0 | Low-quality    | Genome-fragment | 4.75 | 0     |
| 53-final-viral-combined_k141_165271  | [Full]   | 1740 | No  | NA   | 0 | 1 | Low-quality    | Genome-fragment | 2.22 | 0     |
| 517-final-viral-combined_k141_127625 | [Full]   | 1740 | No  | NA   | 0 | 1 | Low-quality    | Genome-fragment | 2.56 | 0     |
| 55-final-viral-combined_k141_31523   | [H]2gene | 1657 | No  | NA   | 0 | 0 | Not-determined | Genome-fragment | NA   | 0     |
| 512-final-viral-combined_k141_177548 | [Full]   | 1740 | No  | NA   | 0 | 0 | Low-quality    | Genome-fragment | 0    | 3.84  |
| 58-final-viral-combined_k141_155029  | [Full]   | 1740 | Yes | 270  | 0 | 0 | Low-quality    | Genome-fragment | 0.78 | 84.48 |
| 511-final-viral-combined_k141_258635 | [Full]   | 1741 | No  | NA   | 0 | 2 | Low-quality    | Genome-fragment | 0.98 | 0     |
| 51-final-viral-combined_k141_23830   | [Full]   | 1741 | No  | NA   | 0 | 1 | Low-quality    | Genome-fragment | 0.84 | 0     |
| 55-final-viral-combined_k141_175360  | [H]2gene | 1375 | No  | NA   | 0 | 0 | Not-determined | Genome-fragment | NA   | 0     |
| 51_k141_332191                       |          | 1741 | No  | NA   | 0 | 1 | Low-quality    | Genome-fragment | 4.91 | 0     |
| 55-final-viral-combined_k141_54755   | [Full]   | 1741 | No  | NA   | 1 | 0 | Low-quality    | Genome-fragment | 4.02 | 0     |
| 58-final-viral-combined_k141_165305  | [Full]   | 1741 | No  | NA   | 0 | 0 | Low-quality    | Genome-fragment | 2.28 | 0     |
| 511-final-viral-combined_k141_123165 | [Full]   | 1742 | No  | NA   | 1 | 0 | Low-quality    | Genome-fragment | 0.14 | 0     |
| 51-final-viral-combined_k141_234767  | [Full]   | 1742 | No  | NA   | 0 | 0 | Low-quality    | Genome-fragment | 4.04 | 0     |
| 51-final-viral-combined_k141_23952   | [Full]   | 1742 | No  | NA   | 0 | 0 | Low-quality    | Genome-fragment | 4.48 | 0     |
| 51-final-viral-combined_k141_242454  | [Full]   | 1742 | No  | NA   | 0 | 0 | Low-quality    | Genome-fragment | 1.89 | 0     |
| 55-final-viral-combined_k141_22285   | [H]2gene | 1772 | No  | NA   | 0 | 1 | Not-determined | Genome-fragment | NA   | 0     |
| 55_k141_4568                         |          | 1742 | No  | NA   | 0 | 1 | Low-quality    | Genome-fragment | 0.3  | 0     |
| 57_k141_134126                       |          | 1742 | No  | NA   | 0 | 0 | Low-quality    | Genome-fragment | 1.81 | 0     |
| 57_k141_91464                        |          | 1742 | No  | NA   | 0 | 2 | Low-quality    | Genome-fragment | 0.48 | 0     |
| 55-final-viral-combined_k141_121411  | [H]2gene | 1451 | No  | NA   | 0 | 0 | Not-determined | Genome-fragment | NA   | 0     |
| 517-final-viral-combined_k141_80991  | [Full]   | 1742 | No  | NA   | 1 | 0 | Low-quality    | Genome-fragment | 4.13 | 0     |
| 58_k141_227060                       |          | 1742 | No  | NA   | 1 | 0 | Low-quality    | Genome-fragment | 2.06 | 0     |
| 51-final-viral-combined_k141_321985  | [Full]   | 1743 | No  | NA   | 0 | 0 | Low-quality    | Genome-fragment | 3.26 | 0     |
| 57-final-viral-combined_k141_134777  | [Full]   | 1743 | No  | NA   | 0 | 0 | Low-quality    | Genome-fragment | 3.83 | 0     |
| 517-final-viral-combined_k141_36480  | [Full]   | 1743 | No  | NA   | 0 | 0 | Low-quality    | Genome-fragment | 3.91 | 0     |
| 52-final-viral-combined_k141_94000   | [Full]   | 1743 | No  | NA   | 1 | 0 | Low-quality    | Genome-fragment | 3.99 | 0     |
| 55-final-viral-combined_k141_113230  | [H]2gene | 3440 | No  | NA   | 0 | 0 | Not-determined | Genome-fragment | NA   | 0     |
| 55-final-viral-combined_k141_149121  | [H]2gene | 1216 | No  | NA   | 0 | 0 | Not-determined | Genome-fragment | NA   | 0     |
| 53-final-viral-combined_k141_88441   | [Full]   | 1744 | No  | NA   | 0 | 0 | Low-quality    | Genome-fragment | 2.73 | 0     |
| 512-final-viral-combined_k141_288621 | [Full]   | 1744 | No  | NA   | 2 | 0 | Low-quality    | Genome-fragment | 4.91 | 0     |
| 52-final-viral-combined_k141_124127  | [Full]   | 1744 | No  | NA   | 0 | 0 | Low-quality    | Genome-fragment | 3.49 | 0     |
| 55-final-viral-combined_k141_122247  | [H]2gene | 2424 | No  | NA   | 0 | 0 | Not-determined | Genome-fragment | NA   | 0     |
| 55-final-viral-combined_k141_23638   | [H]2gene | 1289 | No  | NA   | 0 | 1 | Not-determined | Genome-fragment | NA   | 0     |
| 52_k141_150921                       |          | 1744 | No  | NA   | 1 | 0 | Low-quality    | Genome-fragment | 28.6 | 0     |
| 511-final-viral-combined_k141_285779 | [Full]   | 1745 | No  | NA   | 0 | 1 | Low-quality    | Genome-fragment | 2.62 | 0     |
| 55-final-viral-combined_k141_140309  | [H]2gene | 1209 | No  | NA   | 0 | 0 | Not-determined | Genome-fragment | NA   | 0     |
| 51-final-viral-combined_k141_277664  | [Full]   | 1745 | No  | NA   | 2 | 0 | Low-quality    | Genome-fragment | 4    | 0     |
| 55-final-viral-combined_k141_122562  | [H]2gene | 1152 | No  | NA   | 0 | 0 | Not-determined | Genome-fragment | NA   | 0     |
| 51_k141_114510                       |          | 1745 | No  | NA   | 0 | 0 | Low-quality    | Genome-fragment | 0.3  | 0     |
| 57-final-viral-combined_k141_64296   | [Full]   | 1745 | No  | NA   | 2 | 0 | Low-quality    | Genome-fragment | 3.4  | 0     |
| 57-final-viral-combined_k141_75897   | [Full]   | 1745 | No  | NA   | 0 | 1 | Low-quality    | Genome-fragment | 2.13 | 0     |
| 55-final-viral-combined_k141_149512  | [H]2gene | 1185 | No  | NA   | 0 | 0 | Not-determined | Genome-fragment | NA   | 0     |
| 517-final-viral-combined_k141_212711 | [H]2gene | 1745 | No  | NA   | 1 | 0 | Low-quality    | Genome-fragment | 1.3  | 0     |
| 55-final-v                           |          |      |     |      |   |   |                |                 |      |       |



|                                              |       |    |    |    |    |                |                 |    |      |   |
|----------------------------------------------|-------|----|----|----|----|----------------|-----------------|----|------|---|
| SS_k141_53621                                | 1754  | No | NA | 0  | 2  | Not-determined | Genome-fragment | NA |      | 0 |
| S4_k141_52440                                | 1749  | No | NA | 0  | 1  | Low-quality    | Genome-fragment | NA | 1.02 | 0 |
| SS_k141_80360                                | 1124  | No | NA | 0  | 0  | Not-determined | Genome-fragment | NA |      | 0 |
| SS_k141_116045                               | 6968  | No | NA | 0  | 2  | Not-determined | Genome-fragment | NA |      | 0 |
| SS_k141_62583                                | 4706  | No | NA | 0  | 0  | Not-determined | Genome-fragment | NA |      | 0 |
| SS_k141_178401                               | 1070  | No | NA | 0  | 1  | Not-determined | Genome-fragment | NA |      | 0 |
| SS_k141_169321                               | 6398  | No | NA | 0  | 3  | Not-determined | Genome-fragment | NA |      | 0 |
| SS_k141_169347                               | 1337  | No | NA | 0  | 0  | Not-determined | Genome-fragment | NA |      | 0 |
| SS_k141_169369                               | 1011  | No | NA | 0  | 1  | Not-determined | Genome-fragment | NA |      | 0 |
| SS_k141_116153                               | 1752  | No | NA | 0  | 1  | Not-determined | Genome-fragment | NA |      | 0 |
| S8-final-viral-combined_k141_67595  full     | 1749  | No | NA | 1  | 0  | Low-quality    | Genome-fragment | NA | 2.38 | 0 |
| SS_k141_196251                               | 1457  | No | NA | 0  | 1  | Not-determined | Genome-fragment | NA |      | 0 |
| SS_k141_62598                                | 2723  | No | NA | 0  | 0  | Not-determined | Genome-fragment | NA |      | 0 |
| SS_k141_187313                               | 4845  | No | NA | 0  | 0  | Not-determined | Genome-fragment | NA |      | 0 |
| SS_k141_35790                                | 3442  | No | NA | 0  | 3  | Not-determined | Genome-fragment | NA |      | 0 |
| S9_k141_61823                                | 1750  | No | NA | 0  | 0  | Low-quality    | Genome-fragment | NA | 2.01 | 0 |
| SS_k141_35801                                | 2214  | No | NA | 0  | 0  | Not-determined | Genome-fragment | NA |      | 0 |
| SS_k141_116227                               | 5465  | No | NA | 0  | 1  | Not-determined | Genome-fragment | NA |      | 0 |
| S11-final-viral-combined_k141_321787  full   | 1750  | No | NA | 0  | 0  | Low-quality    | Genome-fragment | NA | 3.04 | 0 |
| SS_k141_205074                               | 1124  | No | NA | 0  | 0  | Not-determined | Genome-fragment | NA |      | 0 |
| S17-k141_59102                               | 1750  | No | NA | 0  | 1  | Low-quality    | Genome-fragment | NA | 0.87 | 0 |
| SS_k141_59397                                | 2862  | No | NA | 0  | 0  | Not-determined | Genome-fragment | NA |      | 0 |
| SS_k141_9423                                 | 3001  | No | NA | 0  | 1  | Not-determined | Genome-fragment | NA |      | 0 |
| SS_k141_160816                               | 3197  | No | NA | 0  | 0  | Not-determined | Genome-fragment | NA |      | 0 |
| S17-k141_141793                              | 1750  | No | NA | 0  | 1  | Low-quality    | Genome-fragment | NA | 1.05 | 0 |
| SS_k141_80293                                | 1240  | No | NA | 0  | 1  | Not-determined | Genome-fragment | NA |      | 0 |
| SS_k141_62679                                | 29809 | No | NA | 14 | 1  | High-quality   | High-quality    | NA | 92.6 | 0 |
| SS_k141_196485                               | 1807  | No | NA | 0  | 1  | Not-determined | Genome-fragment | NA |      | 0 |
| SS_k141_53857                                | 1172  | No | NA | 0  | 2  | Not-determined | Genome-fragment | NA |      | 0 |
| SS_k141_53872                                | 1999  | No | NA | 0  | 0  | Not-determined | Genome-fragment | NA |      | 0 |
| S4-final-viral-combined_k141_159586  full    | 1750  | No | NA | 0  | 1  | Low-quality    | Genome-fragment | NA | 2.06 | 0 |
| S6-final-viral-combined_k141_138004  full    | 1750  | No | NA | 2  | 0  | Low-quality    | Genome-fragment | NA | 4.89 | 0 |
| SS_k141_142916                               | 1532  | No | NA | 0  | 5  | Not-determined | Genome-fragment | NA |      | 0 |
| SS_k141_107314                               | 1082  | No | NA | 0  | 1  | Not-determined | Genome-fragment | NA |      | 0 |
| SS_k141_62731                                | 3450  | No | NA | 0  | 0  | Not-determined | Genome-fragment | NA |      | 0 |
| SS_k141_169559                               | 1017  | No | NA | 0  | 1  | Not-determined | Genome-fragment | NA |      | 0 |
| SS_k141_196532                               | 10370 | No | NA | 0  | 2  | Not-determined | Genome-fragment | NA |      | 0 |
| SS_k141_151732                               | 3580  | No | NA | 0  | 0  | Not-determined | Genome-fragment | NA |      | 0 |
| SS_k141_107353                               | 1317  | No | NA | 0  | 1  | Not-determined | Genome-fragment | NA |      | 0 |
| SS_k141_735                                  | 17206 | No | NA | 0  | 2  | Not-determined | Genome-fragment | NA |      | 0 |
| S8-final-viral-combined_k141_162115  full    | 1750  | No | NA | 0  | 2  | Low-quality    | Genome-fragment | NA | 3.55 | 0 |
| SS_k141_187568                               | 3368  | No | NA | 0  | 6  | Not-determined | Genome-fragment | NA |      | 0 |
| S11-final-viral-combined_k141_282358  full   | 1751  | No | NA | 0  | 1  | Low-quality    | Genome-fragment | NA | 3.71 | 0 |
| SS_k141_9538                                 | 1198  | No | NA | 0  | 0  | Not-determined | Genome-fragment | NA |      | 0 |
| S11-final-viral-combined_k141_168850  H2gene | 1751  | No | NA | 1  | 0  | Low-quality    | Genome-fragment | NA | 0.97 | 0 |
| SS_k141_125060                               | 1250  | No | NA | 0  | 1  | Not-determined | Genome-fragment | NA |      | 0 |
| SS_k141_70033                                | 1751  | No | NA | 0  | 0  | Low-quality    | Genome-fragment | NA | 3.31 | 0 |
| SS_k141_74021                                | 1751  | No | NA | 0  | 0  | Low-quality    | Genome-fragment | NA | 3.66 | 0 |
| SS_k141_36002                                | 7597  | No | NA | 0  | 1  | Not-determined | Genome-fragment | NA |      | 0 |
| SS_k141_44971                                | 1451  | No | NA | 0  | 1  | Not-determined | Genome-fragment | NA |      | 0 |
| SS_k141_44972                                | 7740  | No | NA | 0  | 3  | Not-determined | Genome-fragment | NA |      | 0 |
| SS_k141_841                                  | 12320 | No | NA | 0  | 0  | Not-determined | Genome-fragment | NA |      | 0 |
| SS_k141_842                                  | 4960  | No | NA | 0  | 10 | Not-determined | Genome-fragment | NA |      | 0 |
| SS_k141_54006                                | 2935  | No | NA | 0  | 0  | Not-determined | Genome-fragment | NA |      | 0 |
| SS_k141_71849                                | 1701  | No | NA | 0  | 0  | Not-determined | Genome-fragment | NA |      | 0 |
| S7-final-viral-combined_k141_155305  full    | 1751  | No | NA | 0  | 0  | Low-quality    | Genome-fragment | NA | 3.49 | 0 |
| SS_k141_205298                               | 3299  | No | NA | 0  | 0  | Not-determined | Genome-fragment | NA |      | 0 |
| S17-final-viral-combined_k141_74855  full    | 1751  | No | NA | 0  | 0  | Low-quality    | Genome-fragment | NA | 0.98 | 0 |
| SS_k141_71522                                | 1545  | No | NA | 0  | 1  | Not-determined | Genome-fragment | NA |      | 0 |
| SS_k141_957                                  | 14444 | No | NA | 0  | 8  | Not-determined | Genome-fragment | NA |      | 0 |
| SS_k141_196637                               | 1907  | No | NA | 0  | 0  | Not-determined | Genome-fragment | NA |      | 0 |
| SS_k141_1001                                 | 1057  | No | NA | 0  | 1  | Not-determined | Genome-fragment | NA |      | 0 |
| SS_k141_116366                               | 1258  | No | NA | 0  | 2  | Not-determined | Genome-fragment | NA |      | 0 |
| SS_k141_1013                                 | 3587  | No | NA | 0  | 1  | Not-determined | Genome-fragment | NA |      | 0 |
| S12-final-viral-combined_k141_101460  full   | 1751  | No | NA | 1  | 0  | Low-quality    | Genome-fragment | NA | 1.93 | 0 |
| SS_k141_125257                               | 1698  | No | NA | 0  | 1  | Not-determined | Genome-fragment | NA |      | 0 |
| SS_k141_125258                               | 1733  | No | NA | 0  | 1  | Not-determined | Genome-fragment | NA |      | 0 |
| SS_k141_169689                               | 5137  | No | NA | 0  | 1  | Not-determined | Genome-fragment | NA |      | 0 |
| S4-final-viral-combined_k141_31172  H2gene   | 1751  | No | NA | 1  | 0  | Low-quality    | Genome-fragment | NA | 1.97 | 0 |
| S8-final-viral-combined_k141_237195  full    | 1751  | No | NA | 0  | 0  | Low-quality    | Genome-fragment | NA | 2.37 | 0 |
| SS_k141_134254                               | 1358  | No | NA | 0  | 1  | Not-determined | Genome-fragment | NA |      | 0 |
| SS_k141_54072                                | 1898  | No | NA | 0  | 0  | Not-determined | Genome-fragment | NA |      | 0 |
| SS_k141_205397                               | 1059  | No | NA | 0  | 0  | Not-determined | Genome-fragment | NA |      | 0 |
| S11-final-viral-combined_k141_52635  full    | 1752  | No | NA | 2  | 0  | Low-quality    | Genome-fragment | NA | 3.86 | 0 |
| SS_k141_26146                                | 1288  | No | NA | 0  | 1  | Not-determined | Genome-fragment | NA |      | 0 |
| SS_k141_169929                               | 3092  | No | NA | 0  | 1  | Not-determined | Genome-fragment | NA |      | 0 |
| SS_k141_45120                                | 5586  | No | NA | 0  | 1  | Not-determined | Genome-fragment | NA |      | 0 |
| SS_k141_178667                               | 5177  | No | NA | 0  | 0  | Not-determined | Genome-fragment | NA |      | 0 |
| S7-final-viral-combined_k141_226298  full    | 1752  | No | NA | 0  | 0  | Low-quality    | Genome-fragment | NA | 3.76 | 0 |
| S7-final-viral-combined_k141_44221  full     | 1752  | No | NA | 0  | 0  | Low-quality    | Genome-fragment | NA | 2.8  | 0 |
| S17-final-viral-combined_k141_177561  full   | 1752  | No | NA | 0  | 0  | Low-quality    | Genome-fragment | NA | 3.42 | 0 |
| SS_k141_178751                               | 3463  | No | NA | 0  | 0  | Not-determined | Genome-fragment | NA |      | 0 |
| SS_k141_116481                               | 1020  | No | NA | 0  | 2  | Not-determined | Genome-fragment | NA |      | 0 |
| S12_k141_105456                              | 1752  | No | NA | 1  | 0  | Low-quality    | Genome-fragment | NA | 5.46 | 0 |
| S9-final-viral-combined_k141_81905  full     | 1753  | No | NA | 1  | 0  | Low-quality    | Genome-fragment | NA | 2.87 | 0 |
| SS_k141_205593                               | 1331  | No | NA | 0  | 1  | Not-determined | Genome-fragment | NA |      | 0 |
| SS_k141_90016                                | 1655  | No | NA | 0  | 1  | Not-determined | Genome-fragment | NA |      | 0 |
| S1-final-viral-combined_k141_347046  H2gene  | 1753  | No | NA | 1  | 0  | Low-quality    | Genome-fragment | NA | 4.73 | 0 |
| SS_k141_18510                                | 1262  | No | NA | 0  | 1  | Not-determined | Genome-fragment | NA |      | 0 |
| SS_k141_152121                               | 1411  | No | NA | 0  | 1  | Not-determined | Genome-fragment | NA |      | 0 |
| SS_k141_27320                                | 1217  | No | NA | 0  | 1  | Not-determined | Genome-fragment | NA |      | 0 |
| SS_k141_152161                               | 1497  | No | NA | 0  | 0  | Not-determined | Genome-fragment | NA |      | 0 |
| SS_k141_62995                                | 1261  | No | NA | 0  | 1  | Not-determined | Genome-fragment | NA |      | 0 |
| SS_k141_45304                                | 3871  | No | NA | 0  | 1  | Not-determined | Genome-fragment | NA |      | 0 |
| SS_k141_170231                               | 2492  | No | NA | 0  | 1  | Not-determined | Genome-fragment | NA |      | 0 |
| S7-final-viral-combined_k141_143543  full    | 1753  | No | NA | 0  | 0  | Low-quality    | Genome-fragment | NA | 2.8  | 0 |
| SS_k141_27417                                | 1125  | No | NA | 0  | 1  | Not-determined | Genome-fragment | NA |      | 0 |
| SS_k141_125558                               | 1009  | No | NA | 0  | 0  | Not-determined | Genome-fragment | NA |      | 0 |
| S7-final-viral-combined_k141_232674  full    | 1753  | No | NA | 3  | 0  | Low-quality    | Genome-fragment | NA | 2.22 | 0 |
| S7-final-viral-combined_k141_60264  full     | 1753  | No | NA | 1  | 0  | Low-quality    | Genome-fragment | NA | 2.52 | 0 |
| S12-final-viral-combined_k141_332959  full   | 1753  | No | NA | 0  | 2  | Low-quality    | Genome-fragment | NA | 2.1  | 0 |
| SS_k141_27480                                | 1380  | No | NA | 0  | 2  | Not-determined | Genome-fragment | NA |      | 0 |
| SS_k141_54386                                | 1043  | No | NA | 0  | 1  | Not-determined | Genome-fragment | NA |      | 0 |
| SS_k141_36406                                | 6529  | No | NA | 0  | 0  | Not-determined | Genome-fragment | NA |      | 0 |
| SS_k141_45444                                | 1089  | No | NA | 0  | 1  | Not-determined | Genome-fragment | NA |      | 0 |
| SS_k141_125606                               | 1327  | No | NA | 0  | 1  | Not-determined | Genome-fragment | NA |      | 0 |
| SS_k141_125631                               | 2307  | No | NA | 0  | 2  | Not-determined | Genome-fragment | NA |      | 0 |
| SS_k141_18667                                | 1157  | No | NA | 0  | 0  | Not-determined | Genome-fragment | NA |      | 0 |
| S12-final-viral-combined_k141_99057  full    | 1753  | No | NA | 5  | 0  | Low-quality    | Genome-fragment | NA | 4.9  | 0 |
| S8-final-viral-combined_k141_249245  full    | 1753  | No | NA | 1  | 0  | Low-quality    | Genome-fragment | NA | 1.06 | 0 |
| SS_k141_27570                                | 2357  | No | NA | 0  | 0  | Not-determined | Genome-fragment | NA |      | 0 |
| S1-final-viral-combined_k141_238647  full    | 1754  | No | NA | 2  | 0  | Low-quality    | Genome-fragment | NA | 4.7  | 0 |
| SS_k141_161304                               | 3490  | No | NA | 0  | 0  | Not-determined | Genome-fragment | NA |      | 0 |
| S1_k141_335986                               | 1754  | No | NA | 0  | 1  | Low-quality    | Genome-fragment | NA | 0.62 | 0 |
| SS_k141_122116                               | 1754  | No | NA | 0  | 0  | Low-quality    | Genome-fragment | NA | 2.14 | 0 |
| SS_k141_152372                               | 1068  | No | NA | 0  | 0  | Not-determined | Genome-fragment | NA |      | 0 |
| SS_k141_197031                               | 1126  | No | NA | 0  | 0  | Not-determined | Genome-fragment | NA |      | 0 |
| S12-final-viral-combined_k141_178339  full   | 1754  | No | NA | 0  | 0  | Low-quality    | Genome-fragment | NA | 3.89 | 0 |
| SS_k141_81054                                | 1121  | No | NA | 0  | 0  | Not-determined | Genome-fragment | NA |      | 0 |
| SS_k141_10147                                | 3844  | No | NA | 0  | 1  | Not-determined | Genome-fragment | NA |      | 0 |
| S2-final-viral-combined_k141_22273  full     | 1754  | No | NA | 1  | 0  | Low-quality    | Genome-fragment | NA | 4.95 | 0 |
| S2-final-viral-combined_k141_28272  full     | 1754  | No | NA | 2  | 0  | Low-quality    | Genome-fragment | NA | 2.13 | 0 |
| SS_k141_1712                                 | 4080  | No | NA | 0  | 7  | Not-determined | Genome-fragment | NA |      | 0 |
| SS_k141_170462                               | 1112  | No | NA | 0  | 0  | Not-determined | Genome-fragment | NA |      | 0 |
| SS_k141_134673                               | 2029  | No | NA | 0  | 2  | Not-determined | Genome-fragment | NA |      | 0 |
| SS_k141_125813                               | 1407  | No | NA | 0  | 1  | Not-determined | Genome-fragment | NA |      | 0 |
| SS_k141_27708                                | 1170  | No | NA | 0  | 1  | Not-determined | Genome-fragment | NA |      | 0 |
| SS_k141_22248                                | 4209  | No | NA | 0  | 0  | Not-determined | Genome-fragment | NA |      | 0 |
| SS_k141_27718                                | 3326  | No | NA | 0  | 0  | Not-determined | Genome-fragment | NA |      | 0 |
| S2-final-viral-combined_k141_220720  H2gene  | 1754  | No | NA | 1  | 0  | Low-quality    | Genome-fragment | NA | 1.3  | 0 |
| SS_k141_99031                                | 3346  | No | NA | 0  | 2  | Not-determined | Genome-fragment | NA |      | 0 |
| SS_k141_197104                               | 5553  | No | NA | 0  | 1  | Not-determined | Genome-fragment | NA |      | 0 |
| S2_k141_92145                                | 1754  | No | NA | 0  | 0  | Low-quality    | Genome-fragment | NA | 1.71 | 0 |
| S8-final-viral-combined_k141_271423  H2gene  | 1754  | No | NA | 1  | 0  | Low-quality    | Genome-fragment | NA | 5.44 | 0 |
| SS_k141_197116                               | 1217  | No | NA | 0  | 0  | Not-determined | Genome-fragment | NA |      | 0 |
| S1-final-viral-combined_k141_143680  full    | 1755  | No | NA | 2  | 0  | Low-quality    | Genome-fragment | NA | 4.36 | 0 |
| S1-final-viral-combined_k141_113793  full    | 1755  | No | NA | 0  | 1  | Low-quality    | Genome-fragment | NA | 2.04 | 0 |
| SS_k141_197152                               | 1819  | No | NA | 0  | 2  | Not-determined | Genome          |    |      |   |



|                                             |       |    |    |   |   |                |                 |      |     |
|---------------------------------------------|-------|----|----|---|---|----------------|-----------------|------|-----|
| SS_k141_45868                               | 1990  | No | NA | 0 | 1 | Not-determined | Genome-fragment | NA   | 0   |
| SS_k141_18958                               | 1305  | No | NA | 0 | 1 | Not-determined | Genome-fragment | NA   | 0   |
| SS_k141_18976                               | 2038  | No | NA | 0 | 1 | Not-determined | Genome-fragment | NA   | 0   |
| SS_k141_81539                               | 3115  | No | NA | 0 | 2 | Not-determined | Genome-fragment | NA   | 0   |
| SS_k141_108562                              | 1206  | No | NA | 0 | 1 | Not-determined | Genome-fragment | NA   | 0   |
| S1-final-viral-combined_k141_120584  full   | 1756  | No | NA | 2 | 0 | Low-quality    | Genome-fragment | 3.89 | 0   |
| SS_k141_72670                               | 1052  | No | NA | 0 | 1 | Not-determined | Genome-fragment | NA   | 0   |
| SS_k141_72673                               | 5789  | No | NA | 0 | 1 | Not-determined | Genome-fragment | NA   | 0   |
| SS_k141_120601                              | 2311  | No | NA | 0 | 2 | Not-determined | Genome-fragment | NA   | 0   |
| SS_k141_161588                              | 1189  | No | NA | 0 | 0 | Not-determined | Genome-fragment | NA   | 0   |
| SS_k141_151507                              | 1756  | No | NA | 0 | 2 | Low-quality    | Genome-fragment | 0.5  | 0   |
| SS_k141_72658                               | 6718  | No | NA | 0 | 6 | Not-determined | Genome-fragment | NA   | 0   |
| SS_k141_2174                                | 3590  | No | NA | 0 | 1 | Not-determined | Genome-fragment | NA   | 0   |
| SS_k141_2187                                | 1495  | No | NA | 0 | 0 | Not-determined | Genome-fragment | NA   | 0   |
| SS_k141_170956                              | 1254  | No | NA | 0 | 2 | Not-determined | Genome-fragment | NA   | 0   |
| S12-final-viral-combined_k141_170672  full  | 1756  | No | NA | 1 | 0 | Low-quality    | Genome-fragment | 1    | 0   |
| SS_k141_144230                              | 1295  | No | NA | 0 | 1 | Not-determined | Genome-fragment | NA   | 0   |
| SS_k141_170972                              | 1014  | No | NA | 0 | 1 | Not-determined | Genome-fragment | NA   | 0   |
| S2-final-viral-combined_k141_184174  full   | 1756  | No | NA | 0 | 1 | Low-quality    | Genome-fragment | 1.12 | 0   |
| SS_k141_144262                              | 7519  | No | NA | 0 | 7 | Not-determined | Genome-fragment | NA   | 0   |
| SS_k141_206122                              | 3308  | No | NA | 0 | 0 | Not-determined | Genome-fragment | NA   | 0   |
| SS_k141_197474                              | 1245  | No | NA | 0 | 1 | Not-determined | Genome-fragment | NA   | 0   |
| SS_k141_144328                              | 2876  | No | NA | 0 | 2 | Not-determined | Genome-fragment | NA   | 0   |
| SS_k141_197482                              | 1239  | No | NA | 0 | 1 | Not-determined | Genome-fragment | NA   | 0   |
| SS_k141_2972                                | 1756  | No | NA | 0 | 1 | Low-quality    | Genome-fragment | 4.5  | 0   |
| SS_k141_152953                              | 1110  | No | NA | 0 | 0 | Not-determined | Genome-fragment | NA   | 0   |
| SS_k141_171134                              | 1052  | No | NA | 0 | 0 | Not-determined | Genome-fragment | NA   | 0   |
| S4-final-viral-combined_k141_112568  full   | 1756  | No | NA | 0 | 0 | Low-quality    | Genome-fragment | 2.25 | 0   |
| SS_k141_2284                                | 1968  | No | NA | 0 | 2 | Not-determined | Genome-fragment | NA   | 0   |
| SS_k141_171136                              | 3073  | No | NA | 0 | 0 | Not-determined | Genome-fragment | NA   | 0   |
| SS_k141_37036                               | 1120  | No | NA | 0 | 1 | Not-determined | Genome-fragment | NA   | 0   |
| SS_k141_126145                              | 1047  | No | NA | 0 | 1 | Not-determined | Genome-fragment | NA   | 0   |
| SS_k141_108678                              | 1421  | No | NA | 0 | 1 | Not-determined | Genome-fragment | NA   | 0   |
| SS_k141_99330                               | 1802  | No | NA | 0 | 1 | Not-determined | Genome-fragment | NA   | 0   |
| SS_k141_135074                              | 4587  | No | NA | 0 | 2 | Not-determined | Genome-fragment | NA   | 0   |
| S8-final-viral-combined_k141_37232  H2gene  | 1756  | No | NA | 1 | 0 | Low-quality    | Genome-fragment | 5.13 | 0   |
| SS_k141_10644                               | 1178  | No | NA | 0 | 1 | Not-determined | Genome-fragment | NA   | 0   |
| S11-final-viral-combined_k141_314386  full  | 1757  | No | NA | 1 | 0 | Low-quality    | Genome-fragment | 3.73 | 0   |
| SS_k141_37107                               | 1475  | No | NA | 0 | 0 | Not-determined | Genome-fragment | NA   | 0   |
| SS_k141_243624                              | 1757  | No | NA | 1 | 0 | Low-quality    | Genome-fragment | 1.2  | 0   |
| SS_k141_161733                              | 1340  | No | NA | 0 | 2 | Not-determined | Genome-fragment | NA   | 0   |
| SS_k141_171477                              | 8549  | No | NA | 0 | 1 | Not-determined | Genome-fragment | NA   | 0   |
| SS_k141_99456                               | 3077  | No | NA | 0 | 1 | Not-determined | Genome-fragment | NA   | 0   |
| SS_k141_37150                               | 1225  | No | NA | 0 | 1 | Not-determined | Genome-fragment | NA   | 0   |
| SS_k141_126337                              | 1298  | No | NA | 0 | 1 | Not-determined | Genome-fragment | NA   | 0   |
| SS_k141_28176                               | 3231  | No | NA | 0 | 1 | Not-determined | Genome-fragment | NA   | 0   |
| SS_k141_161809                              | 1030  | No | NA | 0 | 0 | Not-determined | Genome-fragment | NA   | 0   |
| SS_k141_180149                              | 1000  | No | NA | 0 | 1 | Not-determined | Genome-fragment | NA   | 0   |
| SS_k141_2448                                | 1801  | No | NA | 0 | 2 | Not-determined | Genome-fragment | NA   | 0   |
| SS_k141_73142                               | 1353  | No | NA | 0 | 0 | Not-determined | Genome-fragment | NA   | 0   |
| SS_k141_171430                              | 1535  | No | NA | 0 | 1 | Not-determined | Genome-fragment | NA   | 0   |
| SS_k141_5051                                | 1757  | No | NA | 0 | 2 | Low-quality    | Genome-fragment | 4.43 | 0   |
| S7-final-viral-combined_k141_165598  full   | 1757  | No | NA | 0 | 1 | Low-quality    | Genome-fragment | 0.77 | 0   |
| S7_k141_52534                               | 1757  | No | NA | 1 | 0 | Low-quality    | Genome-fragment | 1.84 | 0   |
| SS_k141_28251                               | 7023  | No | NA | 0 | 1 | Not-determined | Genome-fragment | NA   | 0   |
| SS_k141_144584                              | 1021  | No | NA | 0 | 0 | Not-determined | Genome-fragment | NA   | 0   |
| SS_k141_206362                              | 1198  | No | NA | 0 | 1 | Not-determined | Genome-fragment | NA   | 0   |
| SS_k141_188851                              | 5751  | No | NA | 0 | 4 | Not-determined | Genome-fragment | NA   | 0   |
| S17-final-viral-combined_k141_225376  full  | 1757  | No | NA | 0 | 0 | Low-quality    | Genome-fragment | 0.99 | 0   |
| SS_k141_171526                              | 2081  | No | NA | 0 | 2 | Not-determined | Genome-fragment | NA   | 0   |
| SS_k141_10764                               | 1229  | No | NA | 0 | 0 | Not-determined | Genome-fragment | NA   | 0   |
| SS_k141_81583                               | 1576  | No | NA | 0 | 2 | Not-determined | Genome-fragment | NA   | 0   |
| SS_k141_91051                               | 1460  | No | NA | 0 | 2 | Not-determined | Genome-fragment | NA   | 0   |
| S17-final-viral-combined_k141_82370  full   | 1757  | No | NA | 0 | 0 | Low-quality    | Genome-fragment | 6.44 | 0   |
| S12-final-viral-combined_k141_292028  full  | 1757  | No | NA | 0 | 1 | Low-quality    | Genome-fragment | 2.14 | 0   |
| SS_k141_10769                               | 7607  | No | NA | 0 | 1 | Not-determined | Genome-fragment | NA   | 0   |
| S6-final-viral-combined_k141_132973  full   | 1757  | No | NA | 0 | 0 | Low-quality    | Genome-fragment | 3.55 | 0   |
| SS_k141_10783                               | 18932 | No | NA | 1 | 0 | High-quality   | High-quality    | 100  | 100 |
| S11-final-viral-combined_k141_237241  full  | 1758  | No | NA | 0 | 1 | Low-quality    | Genome-fragment | 1.85 | 0   |
| SS_k141_135296                              | 1008  | No | NA | 0 | 1 | Not-determined | Genome-fragment | NA   | 0   |
| SS_k141_2526                                | 1061  | No | NA | 0 | 0 | Not-determined | Genome-fragment | NA   | 0   |
| S1-final-viral-combined_k141_168717  full   | 1758  | No | NA | 0 | 0 | Low-quality    | Genome-fragment | 2.82 | 0   |
| SS_k141_63845                               | 1564  | No | NA | 0 | 1 | Not-determined | Genome-fragment | NA   | 0   |
| SS_k141_171635                              | 2081  | No | NA | 0 | 0 | Not-determined | Genome-fragment | NA   | 0   |
| SS_k141_180254                              | 1391  | No | NA | 0 | 0 | Not-determined | Genome-fragment | NA   | 0   |
| SS_k141_28313                               | 1244  | No | NA | 0 | 1 | Not-determined | Genome-fragment | NA   | 0   |
| SS_k141_28321                               | 2281  | No | NA | 0 | 0 | Not-determined | Genome-fragment | NA   | 0   |
| SS_k141_91154                               | 1073  | No | NA | 0 | 1 | Not-determined | Genome-fragment | NA   | 0   |
| S1_k141_201229                              | 1758  | No | NA | 0 | 1 | Low-quality    | Genome-fragment | 0.87 | 0   |
| SS_k141_28342                               | 2259  | No | NA | 0 | 3 | Not-determined | Genome-fragment | NA   | 0   |
| SS_k141_126583                              | 3679  | No | NA | 0 | 3 | Not-determined | Genome-fragment | NA   | 0   |
| SS_k141_117557                              | 7600  | No | NA | 0 | 2 | Not-determined | Genome-fragment | NA   | 0   |
| SS_k141_2716                                | 1137  | No | NA | 0 | 0 | Not-determined | Genome-fragment | NA   | 0   |
| SS_k141_144716                              | 2328  | No | NA | 0 | 2 | Not-determined | Genome-fragment | NA   | 0   |
| SS_k141_19512                               | 1118  | No | NA | 0 | 0 | Not-determined | Genome-fragment | NA   | 0   |
| S1_k141_215162                              | 1758  | No | NA | 0 | 1 | Low-quality    | Genome-fragment | 3.79 | 0   |
| SS_k141_144768                              | 1226  | No | NA | 0 | 1 | Not-determined | Genome-fragment | NA   | 0   |
| SS_k141_108764                              | 4077  | No | NA | 0 | 0 | Not-determined | Genome-fragment | NA   | 0   |
| S1_k141_142183                              | 1758  | No | NA | 0 | 0 | Low-quality    | Genome-fragment | 0.15 | 0   |
| SS_k141_28474                               | 3805  | No | NA | 0 | 4 | Not-determined | Genome-fragment | NA   | 0   |
| S3-final-viral-combined_k141_79904  full    | 1758  | No | NA | 0 | 1 | Low-quality    | Genome-fragment | 2.44 | 0   |
| S7-final-viral-combined_k141_55777  full    | 1758  | No | NA | 0 | 1 | Low-quality    | Genome-fragment | 3.45 | 0   |
| SS_k141_73427                               | 4694  | No | NA | 0 | 5 | Not-determined | Genome-fragment | NA   | 0   |
| SS_k141_144822                              | 1038  | No | NA | 0 | 1 | Not-determined | Genome-fragment | NA   | 0   |
| SS_k141_189123                              | 3903  | No | NA | 0 | 1 | Not-determined | Genome-fragment | NA   | 0   |
| SS_k141_189141                              | 1338  | No | NA | 0 | 1 | Not-determined | Genome-fragment | NA   | 0   |
| SS_k141_99939                               | 5469  | No | NA | 0 | 0 | Not-determined | Genome-fragment | NA   | 0   |
| S7-final-viral-combined_k141_211685  full   | 1758  | No | NA | 0 | 0 | Low-quality    | Genome-fragment | 2.2  | 0   |
| S12_k141_312175                             | 1758  | No | NA | 0 | 2 | Low-quality    | Genome-fragment | 0.87 | 0   |
| S2-final-viral-combined_k141_52356  full    | 1758  | No | NA | 0 | 1 | Low-quality    | Genome-fragment | 1.06 | 0   |
| SS_k141_197932                              | 3419  | No | NA | 0 | 4 | Not-determined | Genome-fragment | NA   | 0   |
| SS_k141_37654                               | 1058  | No | NA | 0 | 0 | Not-determined | Genome-fragment | NA   | 0   |
| S8-final-viral-combined_k141_119501  full   | 1758  | No | NA | 0 | 2 | Low-quality    | Genome-fragment | 1.16 | 0   |
| SS_k141_10842                               | 1488  | No | NA | 0 | 2 | Not-determined | Genome-fragment | NA   | 0   |
| SS_k141_37641                               | 1280  | No | NA | 0 | 0 | Not-determined | Genome-fragment | NA   | 0   |
| SS_k141_198020                              | 1121  | No | NA | 0 | 1 | Not-determined | Genome-fragment | NA   | 0   |
| S11-final-viral-combined_k141_254492  full  | 1759  | No | NA | 0 | 1 | Low-quality    | Genome-fragment | 1.31 | 0   |
| S17-k141_26337                              | 1759  | No | NA | 0 | 0 | Low-quality    | Genome-fragment | 5.42 | 0   |
| SS_k141_73529                               | 14138 | No | NA | 0 | 0 | Not-determined | Genome-fragment | NA   | 0   |
| S17-k141_141329                             | 1759  | No | NA | 0 | 0 | Low-quality    | Genome-fragment | 14.8 | 0   |
| SS_k141_55547                               | 4535  | No | NA | 0 | 2 | Not-determined | Genome-fragment | NA   | 0   |
| SS_k141_55553                               | 2553  | No | NA | 0 | 0 | Not-determined | Genome-fragment | NA   | 0   |
| SS_k141_126991                              | 3041  | No | NA | 0 | 3 | Not-determined | Genome-fragment | NA   | 0   |
| S4_k141_38442                               | 1759  | No | NA | 0 | 0 | Low-quality    | Genome-fragment | 0.64 | 0   |
| SS_k141_64205                               | 1098  | No | NA | 0 | 1 | Not-determined | Genome-fragment | NA   | 0   |
| SS_k141_180568                              | 1162  | No | NA | 0 | 1 | Not-determined | Genome-fragment | NA   | 0   |
| SS_k141_153694                              | 1039  | No | NA | 0 | 2 | Not-determined | Genome-fragment | NA   | 0   |
| SS_k141_10905                               | 3407  | No | NA | 0 | 2 | Not-determined | Genome-fragment | NA   | 0   |
| SS_k141_91467                               | 4206  | No | NA | 0 | 3 | Not-determined | Genome-fragment | NA   | 0   |
| SS_k141_46874                               | 1504  | No | NA | 0 | 1 | Not-determined | Genome-fragment | NA   | 0   |
| SS_k141_100223                              | 1075  | No | NA | 0 | 0 | Not-determined | Genome-fragment | NA   | 0   |
| SS_k141_198189                              | 1157  | No | NA | 0 | 0 | Not-determined | Genome-fragment | NA   | 0   |
| SS_k141_189390                              | 1062  | No | NA | 0 | 0 | Not-determined | Genome-fragment | NA   | 0   |
| SS_k141_10995                               | 1177  | No | NA | 0 | 1 | Not-determined | Genome-fragment | NA   | 0   |
| SS_k141_46912                               | 2387  | No | NA | 0 | 1 | Not-determined | Genome-fragment | NA   | 0   |
| SS_k141_19632                               | 1577  | No | NA | 0 | 1 | Not-determined | Genome-fragment | NA   | 0   |
| S6-final-viral-combined_k141_111493  H2gene | 1759  | No | NA | 1 | 0 | Low-quality    | Genome-fragment | 0.97 | 0   |
| SS_k141_127083                              | 1113  | No | NA | 0 | 0 | Not-determined | Genome-fragment | NA   | 0   |
| SS_k141_135662                              | 1455  | No | NA | 0 | 0 | Not-determined | Genome-fragment | NA   | 0   |
| S11-final-viral-combined_k141_64945  full   | 1760  | No | NA | 0 | 2 | Low-quality    | Genome-fragment | 3.1  | 0   |
| SS_k141_135688                              | 5451  | No | NA | 0 | 1 | Not-determined | Genome-fragment | NA   | 0   |
| SS_k141_46966                               | 1483  | No | NA | 0 | 0 | Not-determined | Genome-fragment | NA   | 0   |
| SS_k141_189522                              | 1249  | No | NA | 0 | 0 | Not-determined | Genome-fragment | NA   | 0   |
| SS_k141_64406                               | 1058  | No | NA | 0 | 1 | Not-determined | Genome-fragment | NA   | 0   |
| SS_k141_206876                              | 3017  | No | NA | 0 | 1 | Not-determined | Genome-fragment | NA   | 0   |
| S5-final-viral-combined_k141_82741  full    | 1760  | No | NA | 1 | 0 | Low-quality    | Genome-fragment | 4.81 | 0   |
| SS_k141_64441                               | 1781  | No | NA | 0 | 0 | Not-determined | Genome-fragment | NA   | 0   |
| S17-final-viral-combined_k141_97998  full   | 1760  | No | NA | 0 | 0 | Low-quality    | Genome-fragment | 5.51 | 0   |
| S2-final-viral-combined_k141_162188  H2gene | 1760  | No | NA | 1 | 0 | Low-quality    | Genome-fragment | 5.13 | 0   |
| SS_k141_108909                              | 1307  | No | NA | 0 | 1 | Not-determined | Genome-fragment | NA   | 0   |
| SS_k141_64474                               | 1108  | No | NA | 0 | 0 | Not-determined | Genome-fragment | NA   | 0   |
| SS_k141_545092                              | 4871  | No | NA | 0 | 1 | Not-determined | Genome-fragment | NA   | 0   |
| SS_k141_145098                              | 1195  | No | NA | 0 | 0 | Not-determined | Genome-fragment | NA   | 0   |
| SS_k141_64595                               | 1252  | No | NA | 0 | 2 | Not-determined | Genome-fragment | NA   | 0   |
| S4_k141_18340                               | 1760  | No | NA | 0 | 0 | Low-quality    | Genome-fragment | 1.84 | 0   |
| SS_k141_120284                              | 1760  | No | NA | 0 | 0 | Low-quality    | Genome-fragment | 0.9  | 0   |
| SS_k141_100642                              | 1101  | No |    |   |   |                |                 |      |     |



|                                      |       |     |    |     |   |                |                 |    |       |
|--------------------------------------|-------|-----|----|-----|---|----------------|-----------------|----|-------|
| SS_k141_82415                        | 1021  | No  | NA | 0   | 1 | Not-determined | Genome-fragment | NA | 0     |
| SS_k141_64691                        | 1112  | No  | NA | 0   | 0 | Not-determined | Genome-fragment | NA | 0     |
| SS_k141_47355                        | 1061  | No  | NA | 0   | 0 | Not-determined | Genome-fragment | NA | 0     |
| S4-final-viral-combined_k141_61507   | 1761  | No  | NA | 0   | 1 | Low-quality    | Genome-fragment | NA | 1.34  |
| SS_k141_100843                       | 2389  | No  | NA | 0   | 0 | Not-determined | Genome-fragment | NA | 0     |
| S4-final-viral-combined_k141_79170   | 1761  | No  | NA | 0   | 0 | Low-quality    | Genome-fragment | NA | 2.83  |
| S11_k141_109852                      | 1762  | No  | NA | 0   | 0 | Low-quality    | Genome-fragment | NA | 3.1   |
| S12-final-viral-combined_k141_172858 | 1762  | No  | NA | 1   | 0 | Low-quality    | Genome-fragment | NA | 4.02  |
| SS_k141_38069                        | 1178  | No  | NA | 0   | 1 | Not-determined | Genome-fragment | NA | 0     |
| SS_k141_73914                        | 4532  | No  | NA | 0   | 0 | Not-determined | Genome-fragment | NA | 0     |
| SS_k141_127494                       | 4289  | No  | NA | 0   | 0 | Not-determined | Genome-fragment | NA | 0     |
| SS_k141_145366                       | 1936  | No  | NA | 0   | 2 | Low-quality    | Genome-fragment | NA | 1.01  |
| S12-final-viral-combined_k141_249310 | 1762  | No  | NA | 0   | 0 | Not-determined | Genome-fragment | NA | 0     |
| SS_k141_198608                       | 3221  | No  | NA | 0   | 1 | Not-determined | Genome-fragment | NA | 0     |
| SS_k141_535892                       | 2460  | No  | NA | 0   | 1 | Not-determined | Genome-fragment | NA | 0     |
| SS_k141_113131                       | 3060  | No  | NA | 0   | 0 | Not-determined | Genome-fragment | NA | 0     |
| SS_k141_162829                       | 1535  | No  | NA | 0   | 0 | Not-determined | Genome-fragment | NA | 0     |
| SS_k141_127618                       | 3286  | No  | NA | 0   | 0 | Not-determined | Genome-fragment | NA | 0     |
| SS_k141_82518                        | 1625  | No  | NA | 0   | 1 | Not-determined | Genome-fragment | NA | 0     |
| S2-final-viral-combined_k141_235354  | 1762  | No  | NA | 0   | 2 | Low-quality    | Genome-fragment | NA | 2.63  |
| S8_k141_167378                       | 1762  | No  | NA | 0   | 1 | Low-quality    | Genome-fragment | NA | 0.98  |
| S3-final-viral-combined_k141_75560   | 1763  | No  | NA | 1   | 0 | Low-quality    | Genome-fragment | NA | 4.63  |
| SS_k141_127668                       | 1186  | No  | NA | 0   | 1 | Not-determined | Genome-fragment | NA | 0     |
| SS-final-viral-combined_k141_73368   | 1763  | No  | NA | 0   | 2 | Low-quality    | Genome-fragment | NA | 0.41  |
| S7-final-viral-combined_k141_28624   | 1763  | No  | NA | 1   | 0 | Low-quality    | Genome-fragment | NA | 3.57  |
| S2-final-viral-combined_k141_58951   | 1763  | No  | NA | 0   | 0 | Low-quality    | Genome-fragment | NA | 0.72  |
| SS_k141_3677                         | 1939  | No  | NA | 0   | 0 | Not-determined | Genome-fragment | NA | 0     |
| SS_k141_20015                        | 1053  | No  | NA | 0   | 0 | Not-determined | Genome-fragment | NA | 0     |
| SS_k141_74091                        | 2312  | No  | NA | 0   | 1 | Not-determined | Genome-fragment | NA | 0     |
| SS_k141_38295                        | 4014  | No  | NA | 0   | 0 | Not-determined | Genome-fragment | NA | 0     |
| SS_k141_11512                        | 1116  | No  | NA | 0   | 1 | Not-determined | Genome-fragment | NA | 0     |
| S4-final-viral-combined_k141_146701  | 1763  | No  | NA | 0   | 0 | Low-quality    | Genome-fragment | NA | 2.06  |
| S9-final-viral-combined_k141_94183   | 1764  | No  | NA | 0   | 0 | Low-quality    | Genome-fragment | NA | 2.89  |
| S9-final-viral-combined_k141_30540   | 1764  | No  | NA | 1   | 0 | Low-quality    | Genome-fragment | NA | 4.19  |
| SS_k141_198700                       | 1204  | No  | NA | 0   | 0 | Not-determined | Genome-fragment | NA | 0     |
| SS_k141_36009                        | 1217  | No  | NA | 0   | 0 | Not-determined | Genome-fragment | NA | 0     |
| SS_k141_3797                         | 3818  | No  | NA | 0   | 3 | Not-determined | Genome-fragment | NA | 0     |
| S1-final-viral-combined_k141_262853  | 1764  | No  | NA | 0   | 0 | Low-quality    | Genome-fragment | NA | 3.3   |
| SS_k141_20106                        | 1066  | No  | NA | 0   | 1 | Not-determined | Genome-fragment | NA | 0     |
| SS_k141_82681                        | 1058  | No  | NA | 0   | 1 | Not-determined | Genome-fragment | NA | 0     |
| SS_k141_101064                       | 1417  | No  | NA | 0   | 1 | Not-determined | Genome-fragment | NA | 0     |
| SS_k141_181426                       | 4999  | No  | NA | 0   | 3 | Not-determined | Genome-fragment | NA | 0     |
| SS_k141_207656                       | 1203  | No  | NA | 0   | 0 | Not-determined | Genome-fragment | NA | 0     |
| SS-final-viral-combined_k141_77527   | 1764  | Yes | NA | 198 | 1 | Low-quality    | Genome-fragment | NA | 0.47  |
| SS_k141_142035                       | 1764  | No  | NA | 0   | 0 | Low-quality    | Genome-fragment | NA | 5.5   |
| S17-final-viral-combined_k141_254747 | 1764  | No  | NA | 0   | 0 | Low-quality    | Genome-fragment | NA | 4.41  |
| S12-final-viral-combined_k141_266020 | 1764  | No  | NA | 0   | 0 | Low-quality    | Genome-fragment | NA | 1.87  |
| S12_k141_179845                      | 1764  | No  | NA | 1   | 0 | Low-quality    | Genome-fragment | NA | 3.51  |
| SS_k141_118474                       | 1865  | No  | NA | 0   | 2 | Not-determined | Genome-fragment | NA | 0     |
| SS_k141_181543                       | 1296  | No  | NA | 0   | 3 | Not-determined | Genome-fragment | NA | 0     |
| SS_k141_118492                       | 1250  | No  | NA | 0   | 3 | Not-determined | Genome-fragment | NA | 0     |
| S11-final-viral-combined_k141_47820  | 1765  | No  | NA | 0   | 3 | Low-quality    | Genome-fragment | NA | 4.21  |
| SS_k141_74245                        | 1529  | No  | NA | 0   | 0 | Not-determined | Genome-fragment | NA | 0     |
| S1-final-viral-combined_k141_369808  | 1765  | No  | NA | 0   | 0 | Low-quality    | Genome-fragment | NA | 2.53  |
| SS_k141_160405                       | 1765  | Yes | NA | 820 | 1 | Low-quality    | Genome-fragment | NA | 0.53  |
| SS_k141_74275                        | 1046  | No  | NA | 0   | 0 | Not-determined | Genome-fragment | NA | 53.54 |
| SS_k141_145884                       | 3476  | No  | NA | 0   | 0 | Not-determined | Genome-fragment | NA | 0     |
| SS_k141_38422                        | 1316  | No  | NA | 0   | 0 | Not-determined | Genome-fragment | NA | 0     |
| S7_k141_203104                       | 1765  | No  | NA | 0   | 1 | Low-quality    | Genome-fragment | NA | 1.88  |
| SS_k141_128126                       | 1035  | No  | NA | 0   | 1 | Not-determined | Genome-fragment | NA | 0     |
| S12_k141_175953                      | 1765  | No  | NA | 0   | 0 | Low-quality    | Genome-fragment | NA | 4.01  |
| SS_k141_207784                       | 1718  | No  | NA | 0   | 1 | Not-determined | Genome-fragment | NA | 0     |
| SS_k141_38431                        | 6026  | No  | NA | 0   | 2 | Not-determined | Genome-fragment | NA | 0     |
| SS_k141_145957                       | 1392  | No  | NA | 0   | 0 | Not-determined | Genome-fragment | NA | 0     |
| S4-final-viral-combined_k141_17321   | 1765  | No  | NA | 0   | 1 | Low-quality    | Genome-fragment | NA | 1.27  |
| SS_k141_181595                       | 1437  | No  | NA | 0   | 0 | Not-determined | Genome-fragment | NA | 0     |
| S1-final-viral-combined_k141_356114  | 1766  | No  | NA | 3   | 0 | Low-quality    | Genome-fragment | NA | 3.85  |
| SS_k141_65251                        | 2114  | No  | NA | 0   | 2 | Not-determined | Genome-fragment | NA | 0     |
| S1-final-viral-combined_k141_177643  | 1766  | No  | NA | 1   | 0 | Low-quality    | Genome-fragment | NA | 3.23  |
| SS_k141_190479                       | 3085  | No  | NA | 0   | 0 | Not-determined | Genome-fragment | NA | 0     |
| SS_k141_172795                       | 3484  | No  | NA | 0   | 1 | Not-determined | Genome-fragment | NA | 1.18  |
| SS-final-viral-combined_k141_136440  | 1766  | No  | NA | 0   | 1 | Low-quality    | Genome-fragment | NA | 0.83  |
| S7-final-viral-combined_k141_4184    | 1766  | No  | NA | 0   | 2 | Low-quality    | Genome-fragment | NA | 0     |
| SS_k141_136451                       | 1076  | No  | NA | 0   | 2 | Not-determined | Genome-fragment | NA | 0     |
| SS_k141_20417                        | 1083  | No  | NA | 0   | 1 | Not-determined | Genome-fragment | NA | 0     |
| SS_k141_4346                         | 3029  | No  | NA | 0   | 1 | Not-determined | Genome-fragment | NA | 0     |
| SS_k141_11884                        | 1022  | No  | NA | 0   | 0 | Not-determined | Genome-fragment | NA | 0     |
| SS_k141_83030                        | 1272  | No  | NA | 0   | 0 | Not-determined | Genome-fragment | NA | 0     |
| S17-final-viral-combined_k141_7348   | 1766  | No  | NA | 1   | 0 | Low-quality    | Genome-fragment | NA | 3.97  |
| SS_k141_29485                        | 27661 | No  | NA | 0   | 9 | Not-determined | Genome-fragment | NA | 0     |
| S12-final-viral-combined_k141_83518  | 1766  | No  | NA | 0   | 0 | Low-quality    | Genome-fragment | NA | 2.15  |
| S8_k141_22299                        | 1766  | No  | NA | 1   | 0 | Low-quality    | Genome-fragment | NA | 4.19  |
| SS_k141_154546                       | 1297  | No  | NA | 0   | 1 | Not-determined | Genome-fragment | NA | 0     |
| SS_k141_136540                       | 1108  | No  | NA | 0   | 0 | Not-determined | Genome-fragment | NA | 0     |
| SS_k141_128413                       | 7506  | No  | NA | 0   | 3 | Not-determined | Genome-fragment | NA | 0     |
| SS_k141_173095                       | 3565  | No  | NA | 0   | 1 | Not-determined | Genome-fragment | NA | 0     |
| S11-final-viral-combined_k141_252514 | 1767  | No  | NA | 1   | 0 | Low-quality    | Genome-fragment | NA | 4.6   |
| SS_k141_92449                        | 9008  | No  | NA | 0   | 5 | Not-determined | Genome-fragment | NA | 0     |
| S17-final-viral-combined_k141_96623  | 1767  | No  | NA | 0   | 0 | Low-quality    | Genome-fragment | NA | 4.37  |
| S17-k141_139193                      | 1767  | No  | NA | 0   | 0 | Low-quality    | Genome-fragment | NA | 0.71  |
| SS_k141_208039                       | 1061  | No  | NA | 0   | 0 | Not-determined | Genome-fragment | NA | 0     |
| SS_k141_48363                        | 2216  | No  | NA | 0   | 0 | Not-determined | Genome-fragment | NA | 0     |
| S8-final-viral-combined_k141_88934   | 1767  | No  | NA | 0   | 0 | Low-quality    | Genome-fragment | NA | 4.01  |
| SS_k141_190560                       | 1163  | No  | NA | 0   | 3 | Not-determined | Genome-fragment | NA | 0     |
| SS_k141_154545                       | 1328  | No  | NA | 0   | 2 | Not-determined | Genome-fragment | NA | 0     |
| SS_k141_154666                       | 1013  | No  | NA | 0   | 1 | Not-determined | Genome-fragment | NA | 0     |
| S8-final-viral-combined_k141_80226   | 1767  | No  | NA | 1   | 0 | Low-quality    | Genome-fragment | NA | 3.76  |
| S9_k141_64734                        | 1768  | No  | NA | 0   | 0 | Low-quality    | Genome-fragment | NA | 1.25  |
| SS_k141_190680                       | 1293  | No  | NA | 0   | 0 | Not-determined | Genome-fragment | NA | 0     |
| SS_k141_163668                       | 1289  | No  | NA | 0   | 0 | Not-determined | Genome-fragment | NA | 0     |
| SS_k141_136748                       | 1116  | No  | NA | 0   | 0 | Not-determined | Genome-fragment | NA | 0     |
| S11-final-viral-combined_k141_98731  | 1768  | No  | NA | 0   | 1 | Low-quality    | Genome-fragment | NA | 4.06  |
| SS_k141_154726                       | 1189  | No  | NA | 0   | 0 | Not-determined | Genome-fragment | NA | 0     |
| S1-final-viral-combined_k141_387082  | 1768  | No  | NA | 0   | 1 | Low-quality    | Genome-fragment | NA | 0.48  |
| SS_k141_101624                       | 9120  | No  | NA | 0   | 1 | Not-determined | Genome-fragment | NA | 0     |
| S1-final-viral-combined_k141_178516  | 1768  | No  | NA | 2   | 0 | Low-quality    | Genome-fragment | NA | 3.64  |
| S3_k141_112707                       | 1768  | No  | NA | 1   | 0 | Low-quality    | Genome-fragment | NA | 3.39  |
| SS_k141_173290                       | 1259  | No  | NA | 0   | 1 | Not-determined | Genome-fragment | NA | 0     |
| SS_k141_121178                       | 1346  | No  | NA | 0   | 0 | Not-determined | Genome-fragment | NA | 0     |
| SS_k141_92691                        | 1041  | No  | NA | 0   | 1 | Not-determined | Genome-fragment | NA | 0     |
| SS_k141_173328                       | 1294  | No  | NA | 0   | 2 | Not-determined | Genome-fragment | NA | 0     |
| SS_k141_74656                        | 7443  | No  | NA | 0   | 2 | Not-determined | Genome-fragment | NA | 0     |
| SS_k141_199201                       | 1060  | No  | NA | 0   | 1 | Not-determined | Genome-fragment | NA | 0     |
| S12-final-viral-combined_k141_132952 | 1768  | No  | NA | 0   | 4 | Low-quality    | Genome-fragment | NA | 0.58  |
| SS_k141_12218                        | 2041  | No  | NA | 0   | 2 | Not-determined | Genome-fragment | NA | 0     |
| SS_k141_92763                        | 1047  | No  | NA | 0   | 1 | Not-determined | Genome-fragment | NA | 0     |
| S2-final-viral-combined_k141_39440   | 1768  | No  | NA | 2   | 0 | Low-quality    | Genome-fragment | NA | 2.08  |
| S6-final-viral-combined_k141_35682   | 1768  | No  | NA | 1   | 0 | Low-quality    | Genome-fragment | NA | 0.98  |
| SS_k141_29783                        | 1077  | No  | NA | 0   | 1 | Not-determined | Genome-fragment | NA | 0     |
| S8_k141_100816                       | 1768  | No  | NA | 0   | 0 | Low-quality    | Genome-fragment | NA | 4.08  |
| SS_k141_1021818                      | 1735  | No  | NA | 0   | 1 | Not-determined | Genome-fragment | NA | 0     |
| SS_k141_4862                         | 1289  | No  | NA | 0   | 1 | Not-determined | Genome-fragment | NA | 0     |
| SS_k141_146373                       | 5747  | No  | NA | 0   | 0 | Not-determined | Genome-fragment | NA | 0     |
| SS-final-viral-combined_k141_57120   | 1769  | No  | NA | 0   | 0 | Low-quality    | Genome-fragment | NA | 2.56  |
| SS_k141_4890                         | 1408  | No  | NA | 0   | 1 | Not-determined | Genome-fragment | NA | 0     |
| SS_k141_146441                       | 2008  | No  | NA | 0   | 2 | Not-determined | Genome-fragment | NA | 0     |
| S7-final-viral-combined_k141_79409   | 1769  | No  | NA | 2   | 0 | Low-quality    | Genome-fragment | NA | 4.13  |
| SS_k141_101840                       | 2551  | No  | NA | 0   | 2 | Not-determined | Genome-fragment | NA | 0     |
| SS_k141_208337                       | 1164  | No  | NA | 0   | 1 | Not-determined | Genome-fragment | NA | 0     |
| S4_k141_51935                        | 1769  | No  | NA | 0   | 0 | Low-quality    | Genome-fragment | NA | 2.95  |
| S8_k141_158176                       | 1769  | No  | NA | 0   | 0 | Low-quality    | Genome-fragment | NA | 2.62  |
| SS_k141_161890                       | 1229  | No  | NA | 0   | 1 | Not-determined | Genome-fragment | NA | 0     |
| S11-final-viral-combined_k141_183124 | 1770  | No  | NA | 1   | 0 | Low-quality    | Genome-fragment | NA | 5.09  |
| SS_k141_12470                        | 4112  | No  | NA | 0   | 1 | Not-determined | Genome-fragment | NA | 4.46  |
| S1-final-viral-combined_k141_361097  | 1770  | No  | NA | 1   | 0 | Low-quality    | Genome-fragment | NA | 0     |
| SS_k141_39027                        | 1295  | No  | NA | 0   | 1 | Not-determined | Genome-fragment | NA | 0     |
| SS_k141_12483                        | 1183  | No  | NA | 0   | 1 | Not-determined | Genome-fragment | NA | 0     |
| SS_k141_75183                        | 1546  | No  | NA | 0   | 0 | Not-determined | Genome-fragment | NA | 0     |
| SS_k141_5043                         | 1164  | No  | NA | 0   | 1 | Not-determined | Genome-fragment | NA | 0     |
| SS_k141_5050                         | 2291  | No  | NA | 0   | 1 | Not-determined | Genome-fragment | NA | 0     |
| SS_k141_83525                        | 1770  | No  | NA | 0   | 0 | Low-quality    | Genome-fragment | NA | 2.09  |
| SS_k141_137032                       | 7935  | No  | NA | 0   | 1 | Not-determined | Genome-fragment | NA | 0     |
| SS_k141_191006                       | 1081  | No  | NA | 0   | 1 | Not-determined | Genome-fragment | NA | 0     |
| S12-final-viral-combined_k141_337830 | 1770  | No  | NA | 2   | 0 | Low-quality    | Genome-fragment | NA | 3.79  |
| SS_k141_101957                       | 2288  | No  | NA | 0   | 0 | Not-determined | Genome-fragment | NA | 0     |
| SS_k141_56862                        |       |     |    |     |   |                |                 |    |       |



|                                            |       |     |    |   |   |                |                 |       |       |
|--------------------------------------------|-------|-----|----|---|---|----------------|-----------------|-------|-------|
| SS_k141_110471                             | 1285  | No  | NA | 0 | 2 | Not-determined | Genome-fragment | NA    | 0     |
| SS_k141_57187                              | 3348  | No  | NA | 0 | 1 | Not-determined | Genome-fragment | NA    | 0     |
| SS_k141_137359                             | 1006  | No  | NA | 0 | 0 | Not-determined | Genome-fragment | NA    | 0     |
| SS_k141_57198                              | 1012  | No  | NA | 0 | 0 | Not-determined | Genome-fragment | NA    | 0     |
| SS_k141_129054                             | 6710  | No  | NA | 0 | 1 | Not-determined | Genome-fragment | NA    | 0     |
| SS_k141_129085                             | 1046  | No  | NA | 0 | 1 | Not-determined | Genome-fragment | NA    | 0     |
| SS_k141_102437                             | 1262  | No  | NA | 0 | 0 | Not-determined | Genome-fragment | NA    | 0     |
| SS_k141_57293                              | 1172  | No  | NA | 0 | 0 | Not-determined | Genome-fragment | NA    | 0     |
| SS_k141_110553                             | 1068  | No  | NA | 0 | 1 | Not-determined | Genome-fragment | NA    | 0     |
| SS_k141_66284                              | 1486  | No  | NA | 0 | 1 | Not-determined | Genome-fragment | NA    | 0     |
| SI_k141_387545                             | 1772  | No  | NA | 0 | 1 | Low-quality    | Genome-fragment | 0.89  | 0     |
| SS_k141_12947                              | 1422  | No  | NA | 0 | 1 | Not-determined | Genome-fragment | NA    | 0     |
| SS_k141_12964                              | 1115  | No  | NA | 0 | 0 | Not-determined | Genome-fragment | NA    | 0     |
| SS_k141_30157                              | 1296  | No  | NA | 0 | 1 | Not-determined | Genome-fragment | NA    | 0     |
| SS_k141_199917                             | 1158  | No  | NA | 0 | 1 | Not-determined | Genome-fragment | NA    | 0     |
| SS_k141_155324                             | 1154  | No  | NA | 0 | 0 | Not-determined | Genome-fragment | NA    | 0     |
| SS_k141_199934                             | 1174  | No  | NA | 0 | 1 | Not-determined | Genome-fragment | NA    | 0     |
| SS_k141_102519                             | 7788  | No  | NA | 0 | 0 | Not-determined | Genome-fragment | NA    | 0     |
| S2-final-viral-combined_k141_38872  full   | 1772  | No  | NA | 0 | 2 | Low-quality    | Genome-fragment | 2.91  | 0     |
| SS_k141_191193                             | 3680  | No  | NA | 0 | 1 | Not-determined | Genome-fragment | NA    | 0     |
| SS_k141_84082                              | 1233  | No  | NA | 0 | 1 | Not-determined | Genome-fragment | NA    | 0     |
| SS_k141_164332                             | 1076  | No  | NA | 0 | 0 | Not-determined | Genome-fragment | NA    | 0     |
| SS_k141_30201                              | 1075  | No  | NA | 0 | 1 | Not-determined | Genome-fragment | NA    | 0     |
| S12-final-viral-combined_k141_8166  full   | 1772  | No  | NA | 1 | 0 | Low-quality    | Genome-fragment | 2.6   | 0     |
| S2-final-viral-combined_k141_21893  full   | 1772  | No  | NA | 0 | 1 | Low-quality    | Genome-fragment | 1.09  | 0     |
| S4-final-viral-combined_k141_97961  full   | 1772  | No  | NA | 0 | 0 | Low-quality    | Genome-fragment | 4.31  | 0     |
| SS_k141_13092                              | 1100  | No  | NA | 0 | 0 | Not-determined | Genome-fragment | NA    | 0     |
| SS_k141_75674                              | 1176  | No  | NA | 0 | 0 | Not-determined | Genome-fragment | NA    | 0     |
| SS_k141_75723                              | 1668  | No  | NA | 0 | 2 | Not-determined | Genome-fragment | NA    | 0     |
| SS_k141_102689                             | 1437  | No  | NA | 0 | 1 | Not-determined | Genome-fragment | NA    | 0     |
| S1-final-viral-combined_k141_294595  full  | 1773  | No  | NA | 1 | 0 | Low-quality    | Genome-fragment | 4.03  | 0     |
| SS_k141_102751                             | 1966  | No  | NA | 0 | 0 | Not-determined | Genome-fragment | NA    | 0     |
| SS_k141_5730                               | 1038  | No  | NA | 0 | 2 | Not-determined | Genome-fragment | NA    | 0     |
| SS_k141_200072                             | 1559  | No  | NA | 0 | 1 | Not-determined | Genome-fragment | NA    | 0     |
| SS_k141_164452                             | 4571  | No  | NA | 0 | 1 | Not-determined | Genome-fragment | NA    | 0     |
| S17-final-viral-combined_k141_59858  full  | 1773  | No  | NA | 0 | 1 | Low-quality    | Genome-fragment | 1.09  | 0     |
| SS_k141_209040                             | 1795  | No  | NA | 0 | 1 | Not-determined | Genome-fragment | NA    | 0     |
| S17-final-viral-combined_k141_63838  full  | 1773  | No  | NA | 0 | 0 | Low-quality    | Genome-fragment | 4.34  | 0     |
| S17-k141_150544                            | 1773  | No  | NA | 0 | 0 | Low-quality    | Genome-fragment | 0.73  | 0     |
| S12-final-viral-combined_k141_155196  full | 1773  | No  | NA | 0 | 0 | Low-quality    | Genome-fragment | 2.55  | 0     |
| S12-final-viral-combined_k141_340617  full | 1773  | No  | NA | 0 | 0 | Low-quality    | Genome-fragment | 2.46  | 0     |
| S2-final-viral-combined_k141_190856  full  | 1773  | No  | NA | 3 | 0 | Low-quality    | Genome-fragment | 5.29  | 0     |
| SS_k141_129368                             | 2648  | No  | NA | 0 | 1 | Not-determined | Genome-fragment | NA    | 0     |
| SS_k141_110980                             | 1260  | No  | NA | 0 | 1 | Not-determined | Genome-fragment | NA    | 0     |
| SS_k141_191405                             | 1287  | No  | NA | 0 | 1 | Not-determined | Genome-fragment | NA    | 0     |
| SS_k141_84150                              | 1346  | No  | NA | 0 | 1 | Not-determined | Genome-fragment | NA    | 0     |
| SS_k141_57626                              | 1771  | No  | NA | 0 | 1 | Not-determined | Genome-fragment | NA    | 0     |
| SS_k141_129431                             | 1258  | No  | NA | 0 | 2 | Not-determined | Genome-fragment | NA    | 0     |
| SS_k141_129432                             | 1312  | No  | NA | 0 | 0 | Not-determined | Genome-fragment | NA    | 0     |
| SS_k141_147146                             | 6196  | No  | NA | 0 | 1 | Not-determined | Genome-fragment | NA    | 0     |
| S11-final-viral-combined_k141_314190  full | 1774  | No  | NA | 1 | 0 | Low-quality    | Genome-fragment | 4.23  | 0     |
| SS_k141_6068                               | 1056  | No  | NA | 0 | 1 | Not-determined | Genome-fragment | NA    | 0     |
| SS_k141_93583                              | 4818  | No  | NA | 0 | 0 | Not-determined | Genome-fragment | NA    | 0     |
| SS_k141_84499                              | 1100  | No  | NA | 0 | 1 | Not-determined | Genome-fragment | NA    | 0     |
| SS_k141_111222                             | 1590  | No  | NA | 0 | 3 | Not-determined | Genome-fragment | NA    | 0     |
| SS_k141_181600                             | 1175  | No  | NA | 0 | 1 | Not-determined | Genome-fragment | NA    | 0     |
| SS_k141_182620                             | 1638  | No  | NA | 0 | 1 | Not-determined | Genome-fragment | NA    | 0     |
| SS_k141_200348                             | 1389  | No  | NA | 0 | 0 | Not-determined | Genome-fragment | NA    | 0     |
| SI_k141_150431                             | 1774  | No  | NA | 1 | 0 | Low-quality    | Genome-fragment | 2.75  | 0     |
| SS_k141_182688                             | 1300  | No  | NA | 0 | 1 | Not-determined | Genome-fragment | NA    | 0     |
| SS_k141_182703                             | 1109  | No  | NA | 0 | 1 | Not-determined | Genome-fragment | NA    | 0     |
| S7-final-viral-combined_k141_175140  full  | 1774  | No  | NA | 0 | 0 | Low-quality    | Genome-fragment | 2.02  | 0     |
| SS_k141_39854                              | 1222  | No  | NA | 0 | 1 | Not-determined | Genome-fragment | NA    | 0     |
| SS_k141_103031                             | 1109  | No  | NA | 0 | 2 | Not-determined | Genome-fragment | NA    | 0     |
| S12-final-viral-combined_k141_342921  full | 1774  | No  | NA | 2 | 0 | Low-quality    | Genome-fragment | 4.22  | 0     |
| SS_k141_49270                              | 1353  | No  | NA | 0 | 0 | Not-determined | Genome-fragment | NA    | 0     |
| SS_k141_13581                              | 2773  | No  | NA | 0 | 1 | Not-determined | Genome-fragment | NA    | 0     |
| SS_k141_137822                             | 1698  | No  | NA | 0 | 1 | Not-determined | Genome-fragment | NA    | 0     |
| SS_k141_183902                             | 1352  | No  | NA | 0 | 1 | Not-determined | Genome-fragment | NA    | 0     |
| S2-final-viral-combined_k141_90541  full   | 1774  | No  | NA | 0 | 0 | Low-quality    | Genome-fragment | 2.97  | 0     |
| SS_k141_137828                             | 3422  | No  | NA | 0 | 0 | Not-determined | Genome-fragment | NA    | 0     |
| SS_k141_191677                             | 1003  | No  | NA | 0 | 1 | Not-determined | Genome-fragment | NA    | 0     |
| SS_k141_6338                               | 1233  | No  | NA | 0 | 0 | Not-determined | Genome-fragment | NA    | 0     |
| SS_k141_49290                              | 3774  | No  | NA | 0 | 0 | Not-determined | Genome-fragment | NA    | 0     |
| SS_k141_84856                              | 1051  | No  | NA | 0 | 1 | Not-determined | Genome-fragment | NA    | 0     |
| SS_k141_155753                             | 1026  | No  | NA | 0 | 1 | Not-determined | Genome-fragment | NA    | 0     |
| S4-final-viral-combined_k141_125861  full  | 1774  | No  | NA | 0 | 1 | Low-quality    | Genome-fragment | 0.88  | 0     |
| SS_k141_49310                              | 19132 | No  | NA | 9 | 0 | Medium-quality | Genome-fragment | 53.92 | 0     |
| SS_k141_244325                             | 1774  | No  | NA | 0 | 0 | Low-quality    | Genome-fragment | 2.92  | 0     |
| SS_k141_155803                             | 1340  | No  | NA | 0 | 1 | Not-determined | Genome-fragment | NA    | 0     |
| SS_k141_200523                             | 1732  | No  | NA | 0 | 1 | Not-determined | Genome-fragment | NA    | 0     |
| S1-final-viral-combined_k141_234445  full  | 1775  | No  | NA | 0 | 1 | Low-quality    | Genome-fragment | 1.95  | 0     |
| SS_k141_6419                               | 1060  | No  | NA | 0 | 1 | Not-determined | Genome-fragment | NA    | 0     |
| S1-final-viral-combined_k141_63799  full   | 1775  | No  | NA | 0 | 2 | Low-quality    | Genome-fragment | 1.21  | 0     |
| S3-final-viral-combined_k141_105107  full  | 1775  | No  | NA | 0 | 0 | Low-quality    | Genome-fragment | 5.04  | 0     |
| SS_k141_200613                             | 1107  | No  | NA | 0 | 1 | Not-determined | Genome-fragment | NA    | 0     |
| SS_k141_76357                              | 2623  | No  | NA | 0 | 1 | Not-determined | Genome-fragment | NA    | 0     |
| SS_k141_0457                               | 1696  | No  | NA | 0 | 0 | Not-determined | Genome-fragment | NA    | 0     |
| SS_k141_155857                             | 1016  | No  | NA | 0 | 1 | Not-determined | Genome-fragment | NA    | 0     |
| SS-final-viral-combined_k141_142783  full  | 1775  | No  | NA | 0 | 1 | Low-quality    | Genome-fragment | 3.8   | 0     |
| SS_k141_191855                             | 1405  | No  | NA | 0 | 0 | Not-determined | Genome-fragment | NA    | 0     |
| SS_k141_191892                             | 1257  | No  | NA | 0 | 2 | Not-determined | Genome-fragment | NA    | 0     |
| SS_k141_58021                              | 1146  | No  | NA | 0 | 1 | Not-determined | Genome-fragment | NA    | 0     |
| S7-k141_39967                              | 1775  | No  | NA | 0 | 1 | Low-quality    | Genome-fragment | 3.66  | 0     |
| SS_k141_84970                              | 1060  | No  | NA | 0 | 0 | Not-determined | Genome-fragment | NA    | 0     |
| SS_k141_30896                              | 1075  | No  | NA | 0 | 1 | Not-determined | Genome-fragment | NA    | 0     |
| S17-final-viral-combined_k141_214190  full | 1775  | No  | NA | 0 | 1 | Low-quality    | Genome-fragment | 1.25  | 0     |
| S2_k141_174802                             | 1775  | No  | NA | 1 | 0 | Low-quality    | Genome-fragment | 2.88  | 0     |
| SS_k141_200784                             | 1678  | No  | NA | 0 | 1 | Not-determined | Genome-fragment | NA    | 0     |
| SS_k141_209690                             | 1597  | No  | NA | 0 | 1 | Not-determined | Genome-fragment | NA    | 0     |
| SS_k141_120261                             | 1078  | No  | NA | 0 | 4 | Not-determined | Genome-fragment | NA    | 0     |
| SS_k141_200979                             | 1151  | No  | NA | 0 | 0 | Not-determined | Genome-fragment | NA    | 0     |
| SS_k141_200891                             | 1302  | No  | NA | 0 | 1 | Not-determined | Genome-fragment | NA    | 0     |
| SS_k141_209729                             | 1095  | No  | NA | 0 | 1 | Not-determined | Genome-fragment | NA    | 0     |
| SS_k141_85099                              | 6111  | No  | NA | 0 | 3 | Not-determined | Genome-fragment | NA    | 0     |
| SS_k141_209732                             | 1222  | No  | NA | 0 | 0 | Not-determined | Genome-fragment | NA    | 0     |
| SS_k141_40327                              | 7191  | No  | NA | 0 | 3 | Not-determined | Genome-fragment | NA    | 0     |
| SS_k141_35138                              | 1086  | No  | NA | 0 | 1 | Not-determined | Genome-fragment | NA    | 0     |
| S6-final-viral-combined_k141_84085  full   | 1775  | No  | NA | 0 | 1 | Low-quality    | Genome-fragment | 1.25  | 0     |
| S8-final-viral-combined_k141_151502  full  | 1775  | No  | NA | 0 | 0 | Low-quality    | Genome-fragment | 1.67  | 0     |
| SS_k141_58226                              | 1575  | No  | NA | 0 | 1 | Not-determined | Genome-fragment | NA    | 0     |
| SS_k141_58236                              | 1023  | No  | NA | 0 | 1 | Not-determined | Genome-fragment | NA    | 0     |
| SS_k141_66826                              | 1131  | No  | NA | 0 | 1 | Not-determined | Genome-fragment | NA    | 0     |
| SS_k141_58269                              | 1245  | No  | NA | 0 | 1 | Not-determined | Genome-fragment | NA    | 0     |
| SS_k141_164986                             | 4105  | No  | NA | 0 | 4 | Not-determined | Genome-fragment | NA    | 0     |
| SS_k141_58290                              | 1122  | No  | NA | 0 | 0 | Not-determined | Genome-fragment | NA    | 0     |
| SS_k141_6618                               | 3342  | No  | NA | 0 | 2 | Not-determined | Genome-fragment | NA    | 0     |
| SS_k141_49437                              | 1344  | No  | NA | 0 | 0 | Not-determined | Genome-fragment | NA    | 0     |
| S1-final-viral-combined_k141_238335  full  | 1776  | No  | NA | 3 | 0 | Low-quality    | Genome-fragment | 5.11  | 0     |
| SS_k141_129799                             | 1083  | No  | NA | 0 | 1 | Not-determined | Genome-fragment | NA    | 0     |
| SS_k141_94006                              | 1314  | No  | NA | 0 | 1 | Not-determined | Genome-fragment | NA    | 0     |
| SS_k141_6686                               | 3169  | No  | NA | 0 | 1 | Not-determined | Genome-fragment | NA    | 0     |
| SS_k141_6727                               | 2203  | No  | NA | 0 | 3 | Not-determined | Genome-fragment | NA    | 0     |
| SS_k141_111932                             | 1016  | No  | NA | 0 | 1 | Not-determined | Genome-fragment | NA    | 0     |
| S5-final-viral-combined_k141_189008  full  | 1776  | No  | NA | 0 | 0 | Low-quality    | Genome-fragment | 2.33  | 0     |
| SS_k141_6781                               | 1281  | No  | NA | 0 | 3 | Not-determined | Genome-fragment | NA    | 0     |
| SS_k141_94098                              | 1052  | No  | NA | 0 | 1 | Not-determined | Genome-fragment | NA    | 0     |
| S12-final-viral-combined_k141_100913  full | 1776  | No  | NA | 1 | 0 | Low-quality    | Genome-fragment | 3.27  | 0     |
| S2-final-viral-combined_k141_128823  full  | 1776  | Yes | NA | 1 | 1 | Low-quality    | Genome-fragment | 0.73  | 80.35 |
| SS_k141_54967                              | 1776  | No  | NA | 0 | 1 | Low-quality    | Genome-fragment | 4.29  | 0     |
| SS_k141_40685                              | 1776  | No  | NA | 0 | 1 | Low-quality    | Genome-fragment | 0.31  | 0     |
| SS_k141_40616                              | 1185  | No  | NA | 0 | 0 | Not-determined | Genome-fragment | NA    | 0     |
| SS_k141_120337                             | 1085  | No  | NA | 0 | 0 | Not-determined | Genome-fragment | NA    | 0     |
| SS_k141_6891                               | 1208  | No  | NA | 0 | 1 | Not-determined | Genome-fragment | NA    | 0     |
| SS_k141_21524                              | 1105  | No  | NA | 0 | 1 | Not-determined | Genome-fragment | NA    | 0     |
| S17-final-viral-combined_k141_213117  full | 1777  | No  | NA | 0 | 0 | Low-quality    | Genome-fragment | 3.37  | 0     |
| SS_k141_76595                              | 1024  | No  | NA | 0 | 1 | Not-determined | Genome-fragment | NA    | 0     |
| SS_k141_76596                              | 1105  | No  | NA | 0 | 1 | Not-determined | Genome-fragment | NA    | 0     |
| S12-final-viral-combined_k141_257062  full | 1777  | No  | NA | 0 | 0 | Low-quality    | Genome-fragment | 5.48  | 0     |
| SS_k141_183421                             | 3394  | No  | NA | 0 | 1 | Not-determined | Genome-fragment | NA    | 0     |
| SS_k141_94172                              | 5496  | No  | NA | 0 | 4 | Not-determined | Genome-fragment | NA    | 0     |
| SS_k141_220384                             | 1005  | No  | NA | 0 | 0 | Not-determined | Genome-fragment | NA    | 0     |
| SS_k141_120382                             | 7499  | No  | NA | 0 | 4 | Not-determined | Genome-fragment | NA    | 0     |
| S12-final-viral-combined_k141_230364  full | 1777  | No  | NA | 0 | 0 | Low-quality    | Genome-fragment | 2.89  | 0     |
| SS_k141_192020                             | 1016  | No  | NA | 0 | 1 | Not-determined | Genome-fragment | NA    | 0     |
| SS_k141_49684                              | 1209  | No  | NA | 0 | 0 | Not-determined | Genome-fragment |       |       |



|                                            |       |     |    |       |    |                |                 |                 |       |
|--------------------------------------------|-------|-----|----|-------|----|----------------|-----------------|-----------------|-------|
| SS_k141_103733                             | 1456  | No  | NA | 0     | 1  | Not-determined | Genome-fragment | NA              | 0     |
| SS_k141_22250                              | 1071  | No  | NA | 0     | 0  | Not-determined | Genome-fragment | NA              | 0     |
| SS_k141_175034                             | 2748  | No  | NA | 0     | 2  | Not-determined | Genome-fragment | NA              | 0     |
| SS_k141_192505                             | 1613  | No  | NA | 0     | 0  | Not-determined | Genome-fragment | NA              | 0     |
| SS_k141_76829                              | 1189  | No  | NA | 0     | 0  | Not-determined | Genome-fragment | NA              | 0     |
| SS_k141_94390                              | 1127  | No  | NA | 0     | 0  | Not-determined | Genome-fragment | NA              | 0     |
| SS_k141_156300                             | 4341  | No  | NA | 0     | 3  | Not-determined | Genome-fragment | NA              | 0     |
| S7_k141_30341                              | 1778  | No  | NA | 0     | 0  | Low-quality    | Genome-fragment | NA              | 3.2   |
| SS_k141_156330                             | 5849  | No  | NA | 0     | 2  | Not-determined | Genome-fragment | NA              | 0     |
| SS_k141_148037                             | 19695 | No  | NA | 0     | 2  | Not-determined | Genome-fragment | NA              | 0     |
| SS_k141_67365                              | 1024  | No  | NA | 0     | 1  | Not-determined | Genome-fragment | NA              | 0     |
| SS_k141_148059                             | 1104  | No  | NA | 0     | 0  | Not-determined | Genome-fragment | NA              | 0     |
| SS_k141_201218                             | 1179  | No  | NA | 0     | 1  | Not-determined | Genome-fragment | NA              | 0     |
| SS_k141_49963                              | 1641  | No  | NA | 0     | 0  | Not-determined | Genome-fragment | NA              | 0     |
| S17_k141_185500                            | 1778  | No  | NA | 0     | 1  | Low-quality    | Genome-fragment | NA              | 0.47  |
| SS_k141_175143                             | 1405  | No  | NA | 0     | 0  | Not-determined | Genome-fragment | NA              | 0     |
| S2-final-viral-combined_k141_79886[Full]   | 1778  | No  | NA | 0     | 1  | Low-quality    | Genome-fragment | NA              | 3.23  |
| SS_k141_103928                             | 1883  | No  | NA | 0     | 2  | Not-determined | Genome-fragment | NA              | 0     |
| SS_k141_59120                              | 1801  | No  | NA | 0     | 2  | Not-determined | Genome-fragment | NA              | 0     |
| SS_k141_85650                              | 61026 | Yes | NA | 58974 | 11 | 4              | High-quality    | High-quality    | 91.2  |
| SS_k141_175216                             | 1348  | No  | NA | 0     | 0  | Not-determined | Genome-fragment | NA              | 3.36  |
| SS_k141_23431                              | 1024  | No  | NA | 0     | 0  | Not-determined | Genome-fragment | NA              | 0     |
| SS_k141_7477                               | 1394  | No  | NA | 0     | 0  | Not-determined | Genome-fragment | NA              | 0     |
| SS_k141_77105                              | 1322  | No  | NA | 0     | 0  | Not-determined | Genome-fragment | NA              | 0     |
| SS_k141_14548                              | 2210  | No  | NA | 0     | 1  | Not-determined | Genome-fragment | NA              | 0     |
| SS_k141_138839                             | 1502  | No  | NA | 0     | 0  | Not-determined | Genome-fragment | NA              | 0     |
| S8-final-viral-combined_k141_214187[Full]  | 1778  | No  | NA | 0     | 1  | Low-quality    | Genome-fragment | NA              | 0.8   |
| SS_k141_41319                              | 1132  | No  | NA | 0     | 1  | Not-determined | Genome-fragment | NA              | 0     |
| SS_k141_67623                              | 1468  | No  | NA | 0     | 0  | Not-determined | Genome-fragment | NA              | 0     |
| SS_k141_50225                              | 3764  | No  | NA | 0     | 0  | Not-determined | Genome-fragment | NA              | 0     |
| SS_k141_165536                             | 1047  | No  | NA | 0     | 1  | Not-determined | Genome-fragment | NA              | 2.69  |
| S11_k141_578                               | 1779  | No  | NA | 0     | 0  | Low-quality    | Genome-fragment | NA              | 0.88  |
| S1-final-viral-combined_k141_2800[Full]    | 1779  | Yes | NA | 711   | 1  | 1              | Low-quality     | Genome-fragment | 60.03 |
| SS_k141_138967                             | 1329  | No  | NA | 0     | 1  | Not-determined | Genome-fragment | NA              | 0     |
| SS_k141_165585                             | 1382  | No  | NA | 0     | 1  | Not-determined | Genome-fragment | NA              | 0     |
| SS_k141_67649                              | 1002  | No  | NA | 0     | 0  | Not-determined | Genome-fragment | NA              | 0     |
| SS_k141_130812                             | 1023  | No  | NA | 0     | 1  | Not-determined | Genome-fragment | NA              | 0     |
| S1-final-viral-combined_k141_38965[Full]   | 1779  | No  | NA | 1     | 0  | Low-quality    | Genome-fragment | NA              | 4.73  |
| SS_k141_112621                             | 2341  | No  | NA | 0     | 0  | Not-determined | Genome-fragment | NA              | 3.92  |
| S12-final-viral-combined_k141_339653[Full] | 1779  | No  | NA | 0     | 0  | Low-quality    | Genome-fragment | NA              | 0     |
| SS_k141_85796                              | 1566  | No  | NA | 0     | 0  | Not-determined | Genome-fragment | NA              | 0     |
| SS_k141_23115                              | 1252  | No  | NA | 0     | 1  | Not-determined | Genome-fragment | NA              | 0     |
| SS_k141_210354                             | 1034  | No  | NA | 0     | 0  | Not-determined | Genome-fragment | NA              | 0     |
| SS_k141_165656                             | 1356  | No  | NA | 0     | 0  | Not-determined | Genome-fragment | NA              | 0     |
| SS_k141_192884                             | 1041  | No  | NA | 0     | 0  | Not-determined | Genome-fragment | NA              | 0     |
| S12-final-viral-combined_k141_391796[Full] | 1779  | No  | NA | 0     | 0  | Low-quality    | Genome-fragment | NA              | 3.73  |
| SS_k141_7636                               | 3603  | No  | NA | 0     | 1  | Not-determined | Genome-fragment | NA              | 0     |
| SS_k141_192913                             | 1335  | No  | NA | 0     | 0  | Not-determined | Genome-fragment | NA              | 0     |
| SS_k141_184184                             | 5980  | No  | NA | 0     | 2  | Not-determined | Genome-fragment | NA              | 0     |
| SS_k141_139099                             | 3212  | No  | NA | 0     | 1  | Not-determined | Genome-fragment | NA              | 0     |
| SS_k141_210415                             | 1897  | No  | NA | 0     | 1  | Not-determined | Genome-fragment | NA              | 0     |
| SS_k141_184197                             | 1282  | No  | NA | 0     | 0  | Not-determined | Genome-fragment | NA              | 0     |
| SS_k141_22592                              | 1185  | No  | NA | 0     | 1  | Not-determined | Genome-fragment | NA              | 0     |
| SS_k141_139124                             | 2348  | No  | NA | 0     | 1  | Not-determined | Genome-fragment | NA              | 0     |
| SS_k141_192970                             | 4143  | No  | NA | 0     | 1  | Not-determined | Genome-fragment | NA              | 0     |
| SS_k141_210400                             | 20064 | No  | NA | 15    | 0  | Medium-quality | Genome-fragment | NA              | 65.41 |
| SS_k141_104174                             | 3319  | No  | NA | 0     | 0  | Not-determined | Genome-fragment | NA              | 0     |
| SS_k141_121210                             | 1739  | No  | NA | 0     | 1  | Not-determined | Genome-fragment | NA              | 0     |
| SS_k141_210466                             | 1253  | No  | NA | 0     | 0  | Not-determined | Genome-fragment | NA              | 0     |
| SS_k141_59372                              | 1750  | No  | NA | 0     | 1  | Not-determined | Genome-fragment | NA              | 0     |
| S12_k141_206658                            | 1779  | No  | NA | 0     | 2  | Low-quality    | Genome-fragment | NA              | 1.14  |
| SS_k141_210477                             | 1093  | No  | NA | 0     | 0  | Not-determined | Genome-fragment | NA              | 0     |
| S12_k141_192233                            | 1779  | No  | NA | 0     | 0  | Low-quality    | Genome-fragment | NA              | 3.74  |
| SS_k141_139186                             | 1216  | No  | NA | 0     | 0  | Not-determined | Genome-fragment | NA              | 0     |
| S12_k141_9059                              | 1779  | No  | NA | 2     | 0  | Low-quality    | Genome-fragment | NA              | 4.32  |
| SS_k141_184369                             | 1721  | No  | NA | 0     | 1  | Not-determined | Genome-fragment | NA              | 0     |
| SS_k141_184374                             | 1866  | No  | NA | 0     | 0  | Not-determined | Genome-fragment | NA              | 0     |
| SS_k141_156791                             | 1893  | No  | NA | 0     | 0  | Not-determined | Genome-fragment | NA              | 0     |
| S4-final-viral-combined_k141_139669[Full]  | 1779  | No  | NA | 0     | 1  | Low-quality    | Genome-fragment | NA              | 0.78  |
| SS_k141_94730                              | 1216  | No  | NA | 0     | 0  | Not-determined | Genome-fragment | NA              | 0     |
| S6-final-viral-combined_k141_76496[Full]   | 1779  | No  | NA | 0     | 1  | Low-quality    | Genome-fragment | NA              | 3.81  |
| SS_k141_175002                             | 7896  | No  | NA | 0     | 2  | Not-determined | Genome-fragment | NA              | 0     |
| SS_k141_59510                              | 1050  | No  | NA | 0     | 0  | Not-determined | Genome-fragment | NA              | 0     |
| SS_k141_104278                             | 1330  | No  | NA | 0     | 0  | Not-determined | Genome-fragment | NA              | 0     |
| S6-final-viral-combined_k141_122480[Full]  | 1779  | No  | NA | 0     | 0  | Low-quality    | Genome-fragment | NA              | 0.352 |
| SS_k141_86127                              | 5233  | No  | NA | 0     | 2  | Not-determined | Genome-fragment | NA              | 0     |
| S6_k141_116725                             | 1779  | No  | NA | 0     | 1  | Low-quality    | Genome-fragment | NA              | 1.21  |
| SS_k141_59597                              | 3854  | No  | NA | 0     | 1  | Not-determined | Genome-fragment | NA              | 0     |
| S8-final-viral-combined_k141_103744[Full]  | 1779  | No  | NA | 0     | 0  | Low-quality    | Genome-fragment | NA              | 1.51  |
| S8-final-viral-combined_k141_222602[Full]  | 1779  | No  | NA | 1     | 0  | Low-quality    | Genome-fragment | NA              | 1.42  |
| SS_k141_193174                             | 1208  | No  | NA | 0     | 1  | Not-determined | Genome-fragment | NA              | 0     |
| SS_k141_131245                             | 1367  | No  | NA | 0     | 0  | Not-determined | Genome-fragment | NA              | 0     |
| S11-final-viral-combined_k141_101443[Full] | 1780  | No  | NA | 0     | 1  | Low-quality    | Genome-fragment | NA              | 3.76  |
| SS_k141_86240                              | 1223  | No  | NA | 0     | 1  | Not-determined | Genome-fragment | NA              | 0     |
| SS_k141_112912                             | 1595  | No  | NA | 0     | 1  | Not-determined | Genome-fragment | NA              | 0     |
| SS_k141_156948                             | 3127  | No  | NA | 0     | 1  | Not-determined | Genome-fragment | NA              | 0     |
| SS_k141_127047                             | 1780  | No  | NA | 0     | 0  | Low-quality    | Genome-fragment | NA              | 0.82  |
| SS_k141_86269                              | 3155  | No  | NA | 0     | 2  | Not-determined | Genome-fragment | NA              | 0     |
| SS_k141_50585                              | 3373  | No  | NA | 0     | 1  | Not-determined | Genome-fragment | NA              | 0     |
| SS_k141_156977                             | 1812  | No  | NA | 0     | 2  | Not-determined | Genome-fragment | NA              | 0     |
| SS_k141_121485                             | 1260  | No  | NA | 0     | 1  | Not-determined | Genome-fragment | NA              | 0     |
| SS_k141_121488                             | 3279  | No  | NA | 0     | 3  | Not-determined | Genome-fragment | NA              | 0     |
| SS_k141_104445                             | 1183  | No  | NA | 0     | 1  | Not-determined | Genome-fragment | NA              | 0     |
| SS_k141_139508                             | 1121  | No  | NA | 0     | 2  | Not-determined | Genome-fragment | NA              | 0     |
| SS_k141_157017                             | 1566  | No  | NA | 0     | 1  | Not-determined | Genome-fragment | NA              | 0     |
| SS_k141_7887                               | 6247  | No  | NA | 0     | 6  | Not-determined | Genome-fragment | NA              | 0     |
| S2-final-viral-combined_k141_21060[Full]   | 1780  | No  | NA | 0     | 0  | Low-quality    | Genome-fragment | NA              | 2.78  |
| SS_k141_112946                             | 1998  | No  | NA | 0     | 0  | Not-determined | Genome-fragment | NA              | 0     |
| SS_k141_112950                             | 8649  | No  | NA | 0     | 17 | Not-determined | Genome-fragment | NA              | 0     |
| SS_k141_184772                             | 1112  | No  | NA | 0     | 2  | Not-determined | Genome-fragment | NA              | 0     |
| S6-final-viral-combined_k141_118466[Full]  | 1780  | No  | NA | 1     | 0  | Low-quality    | Genome-fragment | NA              | 3.23  |
| SS_k141_23515                              | 1150  | No  | NA | 0     | 1  | Not-determined | Genome-fragment | NA              | 0     |
| SS_k141_131367                             | 1288  | No  | NA | 0     | 3  | Not-determined | Genome-fragment | NA              | 0     |
| SS_k141_148889                             | 1118  | No  | NA | 0     | 1  | Not-determined | Genome-fragment | NA              | 0     |
| SS_k141_184824                             | 3302  | No  | NA | 0     | 1  | Not-determined | Genome-fragment | NA              | 0     |
| SS_k141_157133                             | 1387  | No  | NA | 0     | 1  | Not-determined | Genome-fragment | NA              | 0     |
| SS_k141_131405                             | 2062  | No  | NA | 0     | 0  | Not-determined | Genome-fragment | NA              | 0     |
| SS_k141_50768                              | 2677  | No  | NA | 0     | 0  | Not-determined | Genome-fragment | NA              | 0     |
| SS_k141_59830                              | 1124  | No  | NA | 0     | 0  | Not-determined | Genome-fragment | NA              | 0     |
| S8-final-viral-combined_k141_52432[Full]   | 1780  | No  | NA | 0     | 1  | Low-quality    | Genome-fragment | NA              | 1.57  |
| SS_k141_94915                              | 1163  | No  | NA | 0     | 0  | Not-determined | Genome-fragment | NA              | 0     |
| SS_k141_67969                              | 4091  | No  | NA | 0     | 0  | Not-determined | Genome-fragment | NA              | 0     |
| SS_k141_121745                             | 1282  | No  | NA | 0     | 0  | Not-determined | Genome-fragment | NA              | 0     |
| SS_k141_131530                             | 1044  | No  | NA | 0     | 0  | Not-determined | Genome-fragment | NA              | 0     |
| S8-final-viral-combined_k141_168887[Full]  | 1780  | No  | NA | 0     | 0  | Low-quality    | Genome-fragment | NA              | 4.32  |
| S11_k141_235644                            | 1781  | No  | NA | 1     | 0  | Low-quality    | Genome-fragment | NA              | 4.39  |
| SS_k141_184907                             | 1026  | No  | NA | 0     | 0  | Not-determined | Genome-fragment | NA              | 0     |
| SS_k141_23116                              | 1247  | No  | NA | 0     | 0  | Not-determined | Genome-fragment | NA              | 0     |
| SS_k141_41079                              | 1253  | No  | NA | 0     | 0  | Not-determined | Genome-fragment | NA              | 0     |
| S1-final-viral-combined_k141_237555[Full]  | 1781  | No  | NA | 0     | 2  | Low-quality    | Genome-fragment | NA              | 2.1   |
| SS_k141_157392                             | 2075  | No  | NA | 0     | 0  | Not-determined | Genome-fragment | NA              | 0     |
| S1_k141_66919                              | 1781  | No  | NA | 0     | 1  | Low-quality    | Genome-fragment | NA              | 4.06  |
| SS_k141_139712                             | 1056  | No  | NA | 0     | 1  | Not-determined | Genome-fragment | NA              | 0     |
| SS_k141_94965                              | 41463 | Yes | NA | 37179 | 20 | 2              | High-quality    | High-quality    | 98.56 |
| SS_k141_51091                              | 1291  | No  | NA | 0     | 0  | Not-determined | Genome-fragment | NA              | 10.33 |
| SS_k141_104675                             | 1291  | No  | NA | 0     | 0  | Not-determined | Genome-fragment | NA              | 0     |
| SS_k141_41714                              | 1094  | No  | NA | 0     | 0  | Not-determined | Genome-fragment | NA              | 0     |
| SS_k141_198468                             | 1117  | No  | NA | 0     | 0  | Not-determined | Genome-fragment | NA              | 0     |
| SS_k141_131714                             | 11683 | No  | NA | 0     | 4  | Not-determined | Genome-fragment | NA              | 0     |
| S1_k141_93039                              | 1781  | No  | NA | 0     | 3  | Low-quality    | Genome-fragment | NA              | 0.59  |
| SS_k141_202092                             | 1044  | No  | NA | 0     | 1  | Not-determined | Genome-fragment | NA              | 0     |
| SS_k141_51151                              | 1602  | No  | NA | 0     | 0  | Not-determined | Genome-fragment | NA              | 0     |
| SS_k141_185102                             | 10757 | No  | NA | 0     | 5  | Not-determined | Genome-fragment | NA              | 0     |
| SS_k141_113381                             | 1577  | No  | NA | 0     | 1  | Not-determined | Genome-fragment | NA              | 0     |
| SS_k141_211058                             | 2367  | No  | NA | 0     | 0  | Not-determined | Genome-fragment | NA              | 0     |
| S3-final-viral-combined_k141_82369[Full]   | 1781  | No  | NA | 0     | 0  | Low-quality    | Genome-fragment | NA              | 4.44  |
| SS_k141_68299                              | 1398  | No  | NA | 0     | 0  | Not-determined | Genome-fragment | NA              | 0     |
| SS_k141_75162                              | 1781  | No  | NA | 0     | 0  | Low-quality    | Genome-fragment | NA              | 0.82  |
| SS_k141_23298                              | 1162  | No  | NA | 0     | 1  | Not-determined | Genome-fragment | NA              | 0     |
| S2-final-viral-combined_k141_40200[Full]   | 1781  | No  | NA | 1     | 0  | Low-quality    | Genome-fragment | NA              | 0.97  |
| SS_k141_113390                             | 1137  | No  | NA | 0     | 0  | Not-determined | Genome-fragment | NA              | 0     |
| SS_k141_198142                             | 3384  | No  | NA | 0     | 0  | Not-determined | Genome-fragment | NA              | 0     |
| S8-final-viral-combined_k141_143408[Full]  | 1781  | No  | NA | 0     | 0  | Low-quality    | Genome-fragment | NA              | 2.12  |
| SS_k141_41795                              | 1198  | No  | NA | 0     | 0  | Not-determined | Genome-fragment | NA              | 0     |
| S9-final-viral-combined_k141_109983[Full]  | 1782  | No  | NA | 0     | 0  | Low-quality    | Genome-fragment | NA              | 4.03  |
| SS_k141_23367                              | 1210  | No  | NA | 0     | 1  | Not-determined | Genome-fragment | NA              | 0     |
| SS_k141_202138                             | 1     |     |    |       |    |                |                 |                 |       |



|                                            |       |     |    |   |   |                |                 |    |       |       |
|--------------------------------------------|-------|-----|----|---|---|----------------|-----------------|----|-------|-------|
| SS_k141_68554                              | 1251  | No  | NA | 0 | 2 | Not-determined | Genome-fragment | NA |       | 0     |
| S12-final-viral-combined_k141_292576[full] | 1783  | No  | NA | 0 | 0 | Low-quality    | Genome-fragment | NA | 1.18  | 0     |
| SS_k141_211255                             | 3416  | No  | NA | 0 | 0 | Not-determined | Genome-fragment | NA |       | 0     |
| S17-final-viral-combined_k141_115575[full] | 1783  | No  | NA | 0 | 2 | Low-quality    | Genome-fragment | NA | 2.42  | 0     |
| SS_k141_104943                             | 1617  | No  | NA | 0 | 0 | Not-determined | Genome-fragment | NA |       | 0     |
| SS_k141_191813                             | 2748  | No  | NA | 0 | 0 | Not-determined | Genome-fragment | NA |       | 0     |
| SS_k141_95306                              | 1258  | No  | NA | 0 | 0 | Not-determined | Genome-fragment | NA |       | 0     |
| SS_k141_95309                              | 1892  | No  | NA | 0 | 3 | Not-determined | Genome-fragment | NA |       | 0     |
| S17_k141_215128                            | 1783  | No  | NA | 0 | 2 | Low-quality    | Genome-fragment | NA | 5.03  | 0     |
| SS_k141_157856                             | 1462  | No  | NA | 0 | 0 | Not-determined | Genome-fragment | NA |       | 0     |
| SS_k141_23595                              | 1367  | No  | NA | 0 | 1 | Not-determined | Genome-fragment | NA |       | 0     |
| SS_k141_157859                             | 1212  | No  | NA | 0 | 2 | Not-determined | Genome-fragment | NA |       | 0     |
| SS_k141_60278                              | 1946  | No  | NA | 0 | 0 | Not-determined | Genome-fragment | NA |       | 0     |
| SS_k141_185372                             | 5825  | No  | NA | 0 | 2 | Not-determined | Genome-fragment | NA |       | 0     |
| S17-final-viral-combined_k141_135524[full] | 1783  | No  | NA | 0 | 0 | Low-quality    | Genome-fragment | NA | 3.16  | 0     |
| SS_k141_157936                             | 3451  | No  | NA | 0 | 1 | Not-determined | Genome-fragment | NA |       | 0     |
| SS_k141_15698                              | 1197  | No  | NA | 0 | 0 | Not-determined | Genome-fragment | NA |       | 0     |
| SS_k141_78495                              | 1060  | No  | NA | 0 | 0 | Not-determined | Genome-fragment | NA |       | 0     |
| SS_k141_23653                              | 1219  | No  | NA | 0 | 0 | Not-determined | Genome-fragment | NA |       | 0     |
| SS_k141_157951                             | 1858  | No  | NA | 0 | 1 | Not-determined | Genome-fragment | NA |       | 0     |
| SS_k141_95385                              | 1000  | No  | NA | 0 | 2 | Not-determined | Genome-fragment | NA |       | 0     |
| SS_k141_50326                              | 1471  | No  | NA | 0 | 1 | Not-determined | Genome-fragment | NA |       | 0     |
| S17-final-viral-combined_k141_46295[full]  | 1783  | No  | NA | 0 | 0 | Low-quality    | Genome-fragment | NA | 3.77  | 0     |
| S12-final-viral-combined_k141_26245[full]  | 1783  | No  | NA | 0 | 1 | Low-quality    | Genome-fragment | NA | 2.42  | 0     |
| SS_k141_105141                             | 1244  | No  | NA | 0 | 1 | Not-determined | Genome-fragment | NA |       | 0     |
| SS_k141_8477                               | 1401  | No  | NA | 0 | 0 | Not-determined | Genome-fragment | NA |       | 0     |
| S18-final-viral-combined_k141_18209[full]  | 1783  | No  | NA | 1 | 0 | Low-quality    | Genome-fragment | NA | 0.64  | 0     |
| S19-final-viral-combined_k141_70223[full]  | 1784  | No  | NA | 0 | 0 | Low-quality    | Genome-fragment | NA | 3.51  | 0     |
| SS_k141_8491                               | 1004  | No  | NA | 0 | 1 | Not-determined | Genome-fragment | NA |       | 0     |
| SS_k141_68903                              | 1213  | No  | NA | 0 | 1 | Not-determined | Genome-fragment | NA |       | 0     |
| SS_k141_78652                              | 1059  | No  | NA | 0 | 3 | Not-determined | Genome-fragment | NA |       | 0     |
| SS_k141_144334                             | 10381 | No  | NA | 0 | 1 | Not-determined | Genome-fragment | NA |       | 0     |
| S17-final-viral-combined_k141_122935[full] | 1784  | No  | NA | 2 | 0 | Low-quality    | Genome-fragment | NA | 5.26  | 0     |
| SS_k141_95523                              | 3590  | No  | NA | 0 | 0 | Not-determined | Genome-fragment | NA |       | 0     |
| SS_k141_194101                             | 1319  | No  | NA | 0 | 1 | Not-determined | Genome-fragment | NA |       | 0     |
| S12-final-viral-combined_k141_271114[full] | 1784  | No  | NA | 0 | 1 | Low-quality    | Genome-fragment | NA | 4.48  | 0     |
| SS_k141_122521                             | 3040  | No  | NA | 0 | 1 | Not-determined | Genome-fragment | NA |       | 0     |
| SS_k141_149382                             | 4210  | No  | NA | 0 | 1 | Not-determined | Genome-fragment | NA |       | 0     |
| SS_k141_105244                             | 2719  | No  | NA | 0 | 0 | Not-determined | Genome-fragment | NA |       | 0     |
| SS_k141_149388                             | 3435  | No  | NA | 0 | 2 | Not-determined | Genome-fragment | NA |       | 0     |
| SS_k141_105246                             | 7284  | No  | NA | 0 | 1 | Not-determined | Genome-fragment | NA |       | 0     |
| SS_k141_23275                              | 1150  | No  | NA | 0 | 1 | Not-determined | Genome-fragment | NA |       | 0     |
| SS_k141_78747                              | 1087  | No  | NA | 0 | 1 | Not-determined | Genome-fragment | NA |       | 0     |
| SS_k141_140394                             | 1179  | No  | NA | 0 | 1 | Not-determined | Genome-fragment | NA |       | 0     |
| SS_k141_176517                             | 1853  | No  | NA | 0 | 1 | Not-determined | Genome-fragment | NA |       | 0     |
| S12-final-viral-combined_k141_173505[full] | 1784  | No  | NA | 0 | 1 | Low-quality    | Genome-fragment | NA | 0.51  | 0     |
| SS_k141_33362                              | 4129  | No  | NA | 0 | 1 | Not-determined | Genome-fragment | NA |       | 0     |
| SS_k141_145475                             | 1084  | No  | NA | 0 | 0 | Not-determined | Genome-fragment | NA |       | 0     |
| SS_k141_8690                               | 1009  | No  | NA | 0 | 1 | Not-determined | Genome-fragment | NA |       | 0     |
| SS_k141_23872                              | 3973  | No  | NA | 0 | 2 | Not-determined | Genome-fragment | NA |       | 0     |
| S12-final-viral-combined_k141_123595[full] | 1784  | No  | NA | 1 | 0 | Low-quality    | Genome-fragment | NA | 3.89  | 0     |
| SS_k141_145493                             | 1054  | No  | NA | 0 | 0 | Not-determined | Genome-fragment | NA |       | 0     |
| S18-final-viral-combined_k141_8303[full]   | 1784  | No  | NA | 1 | 0 | Low-quality    | Genome-fragment | NA | 0.92  | 0     |
| SS_k141_68995                              | 1949  | No  | NA | 0 | 1 | Not-determined | Genome-fragment | NA |       | 0     |
| SS_k141_87426                              | 1459  | No  | NA | 0 | 0 | Not-determined | Genome-fragment | NA |       | 0     |
| S19-final-viral-combined_k141_11355[full]  | 1785  | No  | NA | 2 | 0 | Low-quality    | Genome-fragment | NA | 4.25  | 0     |
| SS_k141_8756                               | 3158  | No  | NA | 0 | 1 | Not-determined | Genome-fragment | NA |       | 0     |
| SS_k141_60655                              | 1024  | No  | NA | 0 | 0 | Not-determined | Genome-fragment | NA |       | 0     |
| SS_k141_69054                              | 3366  | No  | NA | 0 | 1 | Not-determined | Genome-fragment | NA |       | 0     |
| SS_k141_202510                             | 3733  | No  | NA | 0 | 1 | Not-determined | Genome-fragment | NA |       | 0     |
| SS_k141_33450                              | 1677  | No  | NA | 0 | 0 | Not-determined | Genome-fragment | NA |       | 0     |
| SS_k141_167007                             | 1210  | No  | NA | 0 | 1 | Not-determined | Genome-fragment | NA |       | 0     |
| SS_k141_15901                              | 2482  | No  | NA | 0 | 1 | Not-determined | Genome-fragment | NA |       | 0     |
| SS_k141_132325                             | 1347  | No  | NA | 0 | 1 | Not-determined | Genome-fragment | NA |       | 0     |
| SS_k141_78859                              | 1170  | No  | NA | 0 | 2 | Not-determined | Genome-fragment | NA |       | 0     |
| SS_k141_167062                             | 2469  | No  | NA | 0 | 5 | Not-determined | Genome-fragment | NA |       | 0     |
| S11-final-viral-combined_k141_326963[full] | 1785  | No  | NA | 0 | 0 | Low-quality    | Genome-fragment | NA | 0.95  | 0     |
| SS_k141_15944                              | 1157  | No  | NA | 0 | 1 | Not-determined | Genome-fragment | NA |       | 0     |
| SS_k141_132823                             | 1151  | No  | NA | 0 | 0 | Not-determined | Genome-fragment | NA |       | 0     |
| S13-final-viral-combined_k141_119303[full] | 1785  | No  | NA | 0 | 2 | Low-quality    | Genome-fragment | NA | 0.71  | 0     |
| SS_k141_122875                             | 1675  | No  | NA | 0 | 0 | Not-determined | Genome-fragment | NA |       | 0     |
| SS_k141_140644                             | 4950  | No  | NA | 0 | 0 | Not-determined | Genome-fragment | NA |       | 0     |
| S15-final-viral-combined_k141_79331[full]  | 1785  | No  | NA | 0 | 1 | Low-quality    | Genome-fragment | NA | 4.21  | 0     |
| SS_k141_176684                             | 1782  | No  | NA | 0 | 1 | Not-determined | Genome-fragment | NA |       | 0     |
| SS_k141_60912                              | 8367  | No  | NA | 0 | 1 | Not-determined | Genome-fragment | NA |       | 0     |
| SS_k141_132482                             | 2775  | No  | NA | 0 | 0 | Not-determined | Genome-fragment | NA |       | 0     |
| S17-final-viral-combined_k141_38166[full]  | 1785  | No  | NA | 0 | 0 | Low-quality    | Genome-fragment | NA | 3.35  | 0     |
| SS_k141_176719                             | 1017  | No  | NA | 0 | 2 | Not-determined | Genome-fragment | NA |       | 0     |
| SS_k141_133511                             | 1378  | No  | NA | 0 | 0 | Not-determined | Genome-fragment | NA |       | 0     |
| S12-final-viral-combined_k141_223527[full] | 1785  | No  | NA | 0 | 2 | Low-quality    | Genome-fragment | NA | 3.24  | 0     |
| SS_k141_95925                              | 1116  | No  | NA | 0 | 0 | Not-determined | Genome-fragment | NA |       | 0     |
| S12-final-viral-combined_k141_316154[full] | 1785  | No  | NA | 0 | 1 | Low-quality    | Genome-fragment | NA | 0.86  | 0     |
| SS_k141_140673                             | 13651 | No  | NA | 0 | 6 | Not-determined | Genome-fragment | NA |       | 0     |
| S12_k141_397452                            | 1785  | No  | NA | 0 | 1 | Low-quality    | Genome-fragment | NA | 2.25  | 0     |
| SS_k141_140647                             | 1459  | No  | NA | 0 | 1 | Not-determined | Genome-fragment | NA |       | 0     |
| SS_k141_185617                             | 1553  | No  | NA | 0 | 2 | Not-determined | Genome-fragment | NA |       | 0     |
| S12-final-viral-combined_k141_58527[full]  | 1785  | No  | NA | 0 | 0 | Low-quality    | Genome-fragment | NA | 4.91  | 0     |
| SS_k141_62400                              | 2759  | No  | NA | 0 | 3 | Not-determined | Genome-fragment | NA |       | 0     |
| SS_k141_52324                              | 1377  | No  | NA | 0 | 0 | Not-determined | Genome-fragment | NA |       | 0     |
| S16-final-viral-combined_k141_13408[full]  | 1785  | No  | NA | 2 | 0 | Low-quality    | Genome-fragment | NA | 5.05  | 0     |
| SS_k141_194503                             | 1268  | No  | NA | 0 | 0 | Not-determined | Genome-fragment | NA | 1.25  | 0     |
| S11-final-viral-combined_k141_290247[full] | 1786  | No  | NA | 0 | 2 | Low-quality    | Genome-fragment | NA | 3.94  | 0     |
| S11-final-viral-combined_k141_354887[full] | 1786  | No  | NA | 2 | 0 | Low-quality    | Genome-fragment | NA |       | 0     |
| SS_k141_202880                             | 1089  | No  | NA | 0 | 1 | Not-determined | Genome-fragment | NA |       | 0     |
| SS_k141_202885                             | 3946  | No  | NA | 0 | 2 | Not-determined | Genome-fragment | NA |       | 0     |
| S12-final-viral-combined_k141_11436[full]  | 1786  | No  | NA | 3 | 0 | Low-quality    | Genome-fragment | NA | 4.66  | 0     |
| SS_k141_176957                             | 1387  | No  | NA | 0 | 2 | Not-determined | Genome-fragment | NA |       | 0     |
| S12-final-viral-combined_k141_182820[full] | 1786  | No  | NA | 1 | 0 | Low-quality    | Genome-fragment | NA | 3.8   | 0     |
| SS_k141_61020                              | 8105  | No  | NA | 0 | 0 | Not-determined | Genome-fragment | NA |       | 0     |
| S12-final-viral-combined_k141_227820[full] | 1786  | No  | NA | 0 | 0 | Low-quality    | Genome-fragment | NA | 3.84  | 0     |
| SS_k141_186079                             | 1787  | No  | NA | 0 | 1 | Low-quality    | Genome-fragment | NA | 1.92  | 0     |
| S12-final-viral-combined_k141_212475[full] | 1787  | No  | NA | 0 | 0 | Low-quality    | Genome-fragment | NA | 4.19  | 0     |
| S14-final-viral-combined_k141_53172[full]  | 1787  | No  | NA | 1 | 0 | Low-quality    | Genome-fragment | NA | 3.67  | 0     |
| SS_k141_149922                             | 1250  | No  | NA | 0 | 0 | Not-determined | Genome-fragment | NA |       | 0     |
| SS_k141_87960                              | 1052  | No  | NA | 0 | 1 | Not-determined | Genome-fragment | NA |       | 0     |
| SS_k141_123281                             | 1005  | No  | NA | 0 | 1 | Not-determined | Genome-fragment | NA |       | 0     |
| SS_k141_177089                             | 1579  | No  | NA | 0 | 2 | Not-determined | Genome-fragment | NA |       | 0     |
| S18-final-viral-combined_k141_28564[full]  | 1787  | No  | NA | 0 | 0 | Low-quality    | Genome-fragment | NA | 3.46  | 0     |
| S19-final-viral-combined_k141_108519[full] | 1788  | No  | NA | 0 | 0 | Low-quality    | Genome-fragment | NA | 2.22  | 0     |
| S15-final-viral-combined_k141_212672[full] | 1788  | No  | NA | 0 | 0 | Low-quality    | Genome-fragment | NA | 4.24  | 0     |
| SS_k141_14031                              | 2817  | No  | NA | 0 | 0 | Not-determined | Genome-fragment | NA |       | 0     |
| S17-final-viral-combined_k141_170584[full] | 1788  | No  | NA | 1 | 0 | Low-quality    | Genome-fragment | NA | 1.24  | 0     |
| SS_k141_42660                              | 1848  | No  | NA | 0 | 1 | Not-determined | Genome-fragment | NA |       | 0     |
| SS_k141_177164                             | 1096  | No  | NA | 0 | 1 | Not-determined | Genome-fragment | NA |       | 0     |
| SS_k141_158507                             | 1215  | No  | NA | 0 | 1 | Not-determined | Genome-fragment | NA |       | 0     |
| S17-final-viral-combined_k141_132426[full] | 1788  | No  | NA | 0 | 0 | Low-quality    | Genome-fragment | NA | 3.55  | 0     |
| SS_k141_52566                              | 6488  | Yes | NA | 1 | 1 | High-quality   | High-quality    | NA | 100   | 24.94 |
| SS_k141_123372                             | 1014  | No  | NA | 0 | 0 | Not-determined | Genome-fragment | NA |       | 0     |
| SS_k141_202966                             | 1188  | No  | NA | 0 | 2 | Not-determined | Genome-fragment | NA |       | 0     |
| SS_k141_88025                              | 2926  | No  | NA | 0 | 2 | Not-determined | Genome-fragment | NA |       | 0     |
| SS_k141_202987                             | 1030  | No  | NA | 0 | 0 | Not-determined | Genome-fragment | NA |       | 0     |
| SS_k141_185947                             | 3568  | No  | NA | 0 | 0 | Not-determined | Genome-fragment | NA |       | 0     |
| SS_k141_203014                             | 1039  | No  | NA | 0 | 1 | Not-determined | Genome-fragment | NA |       | 0     |
| SS_k141_203026                             | 1507  | No  | NA | 0 | 1 | Not-determined | Genome-fragment | NA |       | 0     |
| SS_k141_16143                              | 4617  | No  | NA | 0 | 2 | Not-determined | Genome-fragment | NA |       | 0     |
| SS_k141_16156                              | 1086  | No  | NA | 0 | 0 | Not-determined | Genome-fragment | NA |       | 0     |
| S12_k141_188874                            | 1788  | No  | NA | 0 | 1 | Low-quality    | Genome-fragment | NA | 1.98  | 0     |
| SS_k141_123499                             | 3356  | No  | NA | 2 | 0 | Medium-quality | Genome-fragment | NA | 52.73 | 0     |
| SS_k141_212097                             | 1632  | No  | NA | 0 | 0 | Not-determined | Genome-fragment | NA |       | 0     |
| SS_k141_194967                             | 1205  | No  | NA | 0 | 1 | Not-determined | Genome-fragment | NA |       | 0     |
| SS_k141_150147                             | 1302  | No  | NA | 0 | 0 | Not-determined | Genome-fragment | NA |       | 0     |
| SS_k141_114190                             | 1046  | No  | NA | 0 | 2 | Not-determined | Genome-fragment | NA |       | 0     |
| SS_k141_106046                             | 1254  | No  | NA | 0 | 1 | Not-determined | Genome-fragment | NA |       | 0     |
| SS_k141_42861                              | 6942  | No  | NA | 0 | 1 | Not-determined | Genome-fragment | NA |       | 0     |
| SS_k141_195089                             | 1312  | No  | NA | 0 | 2 | Not-determined | Genome-fragment | NA |       | 0     |
| SS_k141_195106                             | 1232  | No  | NA | 0 | 2 | Not-determined | Genome-fragment | NA |       | 0     |
| SS_k141_16384                              | 2018  | No  | NA | 0 | 2 | Not-determined | Genome-fragment | NA |       | 0     |
| SS_k141_42938                              | 3089  | No  | NA |   |   |                |                 |    |       |       |



|                                      |           |       |     |    |      |   |                |                 |       |      |
|--------------------------------------|-----------|-------|-----|----|------|---|----------------|-----------------|-------|------|
| S1-final-viral-combined_k141_42182   | [full]    | 1790  | No  | NA | 1    | 0 | Low-quality    | Genome-fragment | 2.88  | 0    |
| S5_k141_51304                        |           | 1084  | No  | NA | 0    | 0 | Not-determined | Genome-fragment | NA    | 0    |
| S5_k141_212488                       |           | 1282  | No  | NA | 0    | 1 | Not-determined | Genome-fragment | NA    | 0    |
| S5_k141_212496                       |           | 1041  | No  | NA | 0    | 2 | Not-determined | Genome-fragment | NA    | 0    |
| S1-final-viral-combined_k141_227437  | [full]    | 1790  | No  | NA | 0    | 1 | Low-quality    | Genome-fragment | 0.93  | 0    |
| S5_k141_114651                       |           | 1174  | No  | NA | 0    | 1 | Not-determined | Genome-fragment | NA    | 0    |
| S5_k141_177505                       |           | 1867  | No  | NA | 0    | 2 | Not-determined | Genome-fragment | NA    | 0    |
| S5_k141_159581                       |           | 1011  | No  | NA | 0    | 0 | Not-determined | Genome-fragment | NA    | 0    |
| S5_k141_168202                       |           | 1152  | No  | NA | 0    | 0 | Not-determined | Genome-fragment | NA    | 0    |
| S5_k141_43208                        |           | 1110  | No  | NA | 0    | 0 | Not-determined | Genome-fragment | NA    | 0    |
| S1-final-viral-combined_k141_349214  | [It2gene] | 1790  | Yes | NA | 1615 | 1 | Low-quality    | Genome-fragment | 3.47  | 9.78 |
| S5_k141_141428                       |           | 1021  | No  | NA | 0    | 0 | Not-determined | Genome-fragment | NA    | 0    |
| S5_k141_106529                       |           | 2344  | No  | NA | 0    | 2 | Not-determined | Genome-fragment | NA    | 0    |
| S5_k141_212596                       |           | 8740  | No  | NA | 6    | 0 | Medium-quality | Genome-fragment | 62.16 | 0    |
| S1-final-viral-combined_k141_2158    | [full]    | 1790  | No  | NA | 0    | 1 | Low-quality    | Genome-fragment | 4.59  | 0    |
| S5_k141_114705                       |           | 1387  | No  | NA | 2    | 0 | Not-determined | Genome-fragment | NA    | 0    |
| S5_k141_124133                       |           | 4555  | No  | NA | 0    | 0 | Not-determined | Genome-fragment | NA    | 0    |
| S5_k141_203601                       |           | 1152  | No  | NA | 0    | 1 | Not-determined | Genome-fragment | NA    | 0    |
| S5-final-viral-combined_k141_128614  | [full]    | 1790  | No  | NA | 1    | 0 | Low-quality    | Genome-fragment | 2.23  | 0    |
| S12-final-viral-combined_k141_244454 | [full]    | 1790  | No  | NA | 0    | 0 | Low-quality    | Genome-fragment | 1.38  | 0    |
| S5_k141_203622                       |           | 3666  | No  | NA | 0    | 0 | Not-determined | Genome-fragment | NA    | 0    |
| S11-final-viral-combined_k141_238818 | [It2gene] | 1791  | No  | NA | 0    | 0 | Not-determined | Genome-fragment | 2.18  | 0    |
| S5_k141_195702                       |           | 1077  | No  | NA | 0    | 1 | Not-determined | Genome-fragment | NA    | 0    |
| S11_k141_233652                      |           | 1791  | No  | NA | 0    | 1 | Low-quality    | Genome-fragment | 0.72  | 0    |
| S5_k141_203714                       |           | 1233  | No  | NA | 0    | 1 | Not-determined | Genome-fragment | NA    | 0    |
| S5-final-viral-combined_k141_7475    | [full]    | 1791  | No  | NA | 2    | 0 | Low-quality    | Genome-fragment | 1.2   | 0    |
| S5_k141_25137                        |           | 1647  | No  | NA | 0    | 1 | Not-determined | Genome-fragment | NA    | 0    |
| S5_k141_177613                       |           | 2060  | No  | NA | 0    | 2 | Not-determined | Genome-fragment | NA    | 0    |
| S5_k141_53111                        |           | 6683  | No  | NA | 0    | 0 | Not-determined | Genome-fragment | NA    | 0    |
| S5_k141_11912                        |           | 1791  | No  | NA | 0    | 0 | Low-quality    | Genome-fragment | 4.5   | 0    |
| S5_k141_16993                        |           | 3931  | No  | NA | 0    | 0 | Not-determined | Genome-fragment | NA    | 0    |
| S5_k141_30016                        |           | 1065  | No  | NA | 1    | 1 | Not-determined | Genome-fragment | NA    | 0    |
| S7-final-viral-combined_k141_30127   | [full]    | 1791  | No  | NA | 0    | 2 | Low-quality    | Genome-fragment | 0.58  | 0    |
| S5_k141_124300                       |           | 1932  | No  | NA | 0    | 1 | Not-determined | Genome-fragment | NA    | 0    |
| S5_k141_61603                        |           | 3027  | No  | NA | 0    | 1 | Not-determined | Genome-fragment | NA    | 0    |
| S5_k141_195815                       |           | 1312  | No  | NA | 0    | 1 | Not-determined | Genome-fragment | NA    | 0    |
| S5_k141_195823                       |           | 1164  | No  | NA | 0    | 1 | Not-determined | Genome-fragment | NA    | 0    |
| S5_k141_115034                       |           | 1073  | No  | NA | 0    | 0 | Not-determined | Genome-fragment | NA    | 0    |
| S5_k141_136701                       |           | 1361  | No  | NA | 0    | 0 | Not-determined | Genome-fragment | NA    | 0    |
| S5_k141_195864                       |           | 1986  | No  | NA | 0    | 4 | Not-determined | Genome-fragment | NA    | 0    |
| S5_k141_177660                       |           | 1257  | No  | NA | 0    | 1 | Not-determined | Genome-fragment | NA    | 0    |
| S5_k141_24777                        |           | 1435  | No  | NA | 1    | 1 | Not-determined | Genome-fragment | NA    | 0    |
| S17-final-viral-combined_k141_174061 | [full]    | 1791  | No  | NA | 1    | 0 | Low-quality    | Genome-fragment | 4.1   | 0    |
| S5_k141_133486                       |           | 1194  | No  | NA | 0    | 1 | Not-determined | Genome-fragment | NA    | 0    |
| S5_k141_53372                        |           | 1308  | No  | NA | 0    | 1 | Not-determined | Genome-fragment | NA    | 0    |
| S5_k141_80171                        |           | 1029  | No  | NA | 0    | 1 | Not-determined | Genome-fragment | NA    | 0    |
| S5_k141_155943                       |           | 1821  | No  | NA | 0    | 1 | Not-determined | Genome-fragment | NA    | 0    |
| S5_k141_115094                       |           | 1116  | No  | NA | 0    | 1 | Not-determined | Genome-fragment | NA    | 0    |
| S5_k141_106841                       |           | 1074  | No  | NA | 0    | 1 | Not-determined | Genome-fragment | NA    | 0    |
| S5_k141_106862                       |           | 1035  | No  | NA | 0    | 0 | Not-determined | Genome-fragment | NA    | 0    |
| S5_k141_43673                        |           | 1122  | No  | NA | 0    | 0 | Not-determined | Genome-fragment | NA    | 0    |
| S5_k141_115142                       |           | 1054  | No  | NA | 0    | 1 | Not-determined | Genome-fragment | NA    | 0    |
| S5_k141_203920                       |           | 1701  | No  | NA | 0    | 4 | Not-determined | Genome-fragment | NA    | 0    |
| S5_k141_70334                        |           | 1463  | No  | NA | 0    | 1 | Not-determined | Genome-fragment | NA    | 0    |
| S17-final-viral-combined_k141_120680 | [full]    | 1791  | No  | NA | 0    | 0 | Low-quality    | Genome-fragment | 13.1  | 0    |
| S5_k141_97740                        |           | 2067  | No  | NA | 0    | 1 | Not-determined | Genome-fragment | NA    | 0    |
| S5_k141_25341                        |           | 1573  | No  | NA | 0    | 0 | Not-determined | Genome-fragment | NA    | 0    |
| S5_k141_141967                       |           | 2040  | No  | NA | 0    | 2 | Not-determined | Genome-fragment | NA    | 0    |
| S5_k141_204015                       |           | 1239  | No  | NA | 0    | 2 | Not-determined | Genome-fragment | NA    | 0    |
| S5_k141_124622                       |           | 1415  | No  | NA | 0    | 1 | Not-determined | Genome-fragment | NA    | 0    |
| S5_k141_177889                       |           | 1182  | No  | NA | 0    | 0 | Not-determined | Genome-fragment | NA    | 0    |
| S17-k141_225902                      |           | 1791  | No  | NA | 0    | 0 | Low-quality    | Genome-fragment | 2.36  | 0    |
| S8-final-viral-combined_k141_224109  | [full]    | 1791  | No  | NA | 1    | 0 | Low-quality    | Genome-fragment | 4.03  | 0    |
| S5_k141_70428                        |           | 1086  | No  | NA | 0    | 1 | Not-determined | Genome-fragment | NA    | 0    |
| S5_k141_57843                        |           | 3078  | No  | NA | 0    | 1 | Not-determined | Genome-fragment | NA    | 0    |
| S5_k141_35230                        |           | 1042  | No  | NA | 0    | 0 | Not-determined | Genome-fragment | NA    | 0    |
| S5_k141_97869                        |           | 1069  | No  | NA | 0    | 0 | Not-determined | Genome-fragment | NA    | 0    |
| S5_k141_97885                        |           | 1016  | No  | NA | 0    | 0 | Not-determined | Genome-fragment | NA    | 0    |
| S5_k141_17308                        |           | 3746  | No  | NA | 0    | 0 | Not-determined | Genome-fragment | NA    | 0    |
| S5_k141_97903                        |           | 1211  | No  | NA | 0    | 0 | Not-determined | Genome-fragment | NA    | 0    |
| S5_k141_35279                        |           | 1092  | No  | NA | 0    | 0 | Not-determined | Genome-fragment | NA    | 0    |
| S5_k141_142112                       |           | 1068  | No  | NA | 0    | 1 | Not-determined | Genome-fragment | NA    | 0    |
| S5_k141_43915                        |           | 1432  | No  | NA | 0    | 1 | Not-determined | Genome-fragment | NA    | 0    |
| S5_k141_159805                       |           | 1057  | No  | NA | 0    | 0 | Not-determined | Genome-fragment | NA    | 0    |
| S5_k141_178157                       |           | 1081  | No  | NA | 0    | 1 | Not-determined | Genome-fragment | NA    | 0    |
| S5_k141_115369                       |           | 1106  | No  | NA | 0    | 1 | Not-determined | Genome-fragment | NA    | 0    |
| S5_k141_115396                       |           | 1222  | No  | NA | 0    | 2 | Not-determined | Genome-fragment | NA    | 0    |
| S5_k141_151362                       |           | 1122  | No  | NA | 0    | 0 | Not-determined | Genome-fragment | NA    | 0    |
| S5_k141_168984                       |           | 1848  | No  | NA | 0    | 2 | Not-determined | Genome-fragment | NA    | 0    |
| S5_k141_115409                       |           | 1477  | No  | NA | 0    | 2 | Not-determined | Genome-fragment | NA    | 0    |
| S5_k141_17470                        |           | 1031  | No  | NA | 0    | 1 | Not-determined | Genome-fragment | NA    | 0    |
| S5_k141_187030                       |           | 1679  | No  | NA | 0    | 1 | Not-determined | Genome-fragment | NA    | 0    |
| S5_k141_17481                        |           | 1314  | No  | NA | 0    | 1 | Not-determined | Genome-fragment | NA    | 0    |
| S5_k141_124719                       |           | 2346  | No  | NA | 0    | 1 | Not-determined | Genome-fragment | NA    | 0    |
| S8-final-viral-combined_k141_228550  | [full]    | 1791  | No  | NA | 0    | 1 | Low-quality    | Genome-fragment | 0.84  | 0    |
| S5_k141_70598                        |           | 2567  | No  | NA | 0    | 3 | Not-determined | Genome-fragment | NA    | 0    |
| S5_k141_25598                        |           | 1264  | No  | NA | 0    | 0 | Not-determined | Genome-fragment | NA    | 0    |
| S5_k141_44083                        |           | 1081  | No  | NA | 0    | 0 | Not-determined | Genome-fragment | NA    | 0    |
| S5_k141_115494                       |           | 15940 | No  | NA | 0    | 4 | Not-determined | Genome-fragment | NA    | 0    |
| S5_k141_204269                       |           | 1526  | No  | NA | 0    | 0 | Not-determined | Genome-fragment | NA    | 0    |
| S1-final-viral-combined_k141_10819   | [full]    | 1792  | No  | NA | 0    | 3 | Low-quality    | Genome-fragment | 0.62  | 0    |
| S5_k141_35485                        |           | 3472  | No  | NA | 0    | 1 | Not-determined | Genome-fragment | NA    | 0    |
| S3-final-viral-combined_k141_48588   | [full]    | 1792  | No  | NA | 0    | 0 | Low-quality    | Genome-fragment | 2.22  | 0    |
| S5_k141_62316                        |           | 1757  | No  | NA | 0    | 0 | Not-determined | Genome-fragment | NA    | 0    |
| S5_k141_44090                        |           | 1105  | No  | NA | 0    | 0 | Not-determined | Genome-fragment | NA    | 0    |
| S12-final-viral-combined_k141_93848  | [full]    | 1792  | No  | NA | 0    | 0 | Low-quality    | Genome-fragment | 3.42  | 0    |
| S8-final-viral-combined_k141_266776  | [full]    | 1792  | No  | NA | 0    | 0 | Low-quality    | Genome-fragment | 5.16  | 0    |
| S5_k141_44158                        |           | 6918  | No  | NA | 0    | 2 | Not-determined | Genome-fragment | NA    | 0    |
| S5_k141_160248                       |           | 1214  | No  | NA | 0    | 2 | Not-determined | Genome-fragment | NA    | 0    |
| S5_k141_44205                        |           | 1786  | No  | NA | 0    | 1 | Not-determined | Genome-fragment | NA    | 0    |
| S1-final-viral-combined_k141_16840   | [full]    | 1793  | No  | NA | 0    | 3 | Low-quality    | Genome-fragment | 0.64  | 0    |
| S5_k141_44221                        |           | 1348  | No  | NA | 0    | 2 | Not-determined | Genome-fragment | NA    | 0    |
| S5_k141_17760                        |           | 1309  | No  | NA | 0    | 1 | Not-determined | Genome-fragment | NA    | 0    |
| S5_k141_25885                        |           | 1426  | No  | NA | 0    | 1 | Not-determined | Genome-fragment | NA    | 0    |
| S5_k141_47376                        |           | 1793  | No  | NA | 0    | 1 | Low-quality    | Genome-fragment | 1.76  | 0    |
| S5_k141_25988                        |           | 1126  | No  | NA | 0    | 2 | Not-determined | Genome-fragment | NA    | 0    |
| S5_k141_70978                        |           | 1170  | No  | NA | 0    | 1 | Not-determined | Genome-fragment | NA    | 0    |
| S5_k141_204866                       |           | 1072  | No  | NA | 0    | 0 | Not-determined | Genome-fragment | NA    | 0    |
| S5_k141_191179                       |           | 1794  | No  | NA | 0    | 1 | Low-quality    | Genome-fragment | 2.89  | 0    |
| S5_k141_26201                        |           | 1091  | No  | NA | 0    | 0 | Not-determined | Genome-fragment | NA    | 0    |
| S5_k141_71713                        |           | 1760  | No  | NA | 0    | 1 | Not-determined | Genome-fragment | NA    | 0    |
| S17-final-viral-combined_k141_83400  | [full]    | 1794  | No  | NA | 0    | 1 | Low-quality    | Genome-fragment | 1.39  | 0    |
| S5_k141_26558                        |           | 2153  | No  | NA | 0    | 2 | Not-determined | Genome-fragment | NA    | 0    |
| S5_k141_213586                       |           | 5672  | No  | NA | 0    | 2 | Not-determined | Genome-fragment | NA    | 0    |
| S5_k141_213600                       |           | 2628  | No  | NA | 0    | 0 | Not-determined | Genome-fragment | NA    | 0    |
| S5_k141_213621                       |           | 5781  | No  | NA | 0    | 0 | Not-determined | Genome-fragment | NA    | 0    |
| S17-k141_3644                        |           | 1794  | No  | NA | 0    | 0 | Low-quality    | Genome-fragment | 2.93  | 0    |
| S7-final-viral-combined_k141_83411   | [full]    | 7665  | No  | NA | 16   | 6 | Not-determined | Genome-fragment | NA    | 0    |
| S7-final-viral-combined_k141_217226  | [full]    | 86233 | No  | NA | 1    | 1 | High-quality   | High-quality    | 98.84 | 0    |
| S7-final-viral-combined_k141_139683  | [full]    | 32722 | No  | NA | 17   | 1 | High-quality   | High-quality    | 100   | 0    |
| S7-final-viral-combined_k141_83423   | [full]    | 4252  | No  | NA | 0    | 0 | Not-determined | Genome-fragment | NA    | 0    |
| S12-final-viral-combined_k141_344183 | [full]    | 1794  | No  | NA | 0    | 0 | Low-quality    | Genome-fragment | 4.39  | 0    |
| S2-final-viral-combined_k141_87812   | [full]    | 1794  | No  | NA | 0    | 0 | Low-quality    | Genome-fragment | 1.13  | 0    |
| S7-final-viral-combined_k141_61275   | [full]    | 1073  | No  | NA | 0    | 2 | Not-determined | Genome-fragment | NA    | 0    |
| S7-final-viral-combined_k141_81707   | [full]    | 1739  | No  | NA | 0    | 0 | Not-determined | Genome-fragment | NA    | 0    |
| S2_k141_209835                       |           | 1794  | No  | NA | 0    | 0 | Low-quality    | Genome-fragment | 4.26  | 0    |
| S7-final-viral-combined_k141_132769  | [full]    | 2148  | No  | NA | 0    | 1 | Not-determined | Genome-fragment | NA    | 0    |
| S1_k141_265277                       |           | 1795  | No  | NA | 0    | 2 | Low-quality    | Genome-fragment | 0.79  | 0    |
| S7-final-viral-combined_k141_173610  | [full]    | 1111  | No  | NA | 0    | 1 | Not-determined | Genome-fragment | NA    | 0    |
| S7-final-viral-combined_k141_204249  | [full]    | 5416  | No  | NA | 0    | 2 | Not-determined | Genome-fragment | NA    | 0    |
| S7-final-viral-combined_k141_81712   | [full]    | 7247  | No  | NA | 0    | 6 | Not-determined | Genome-fragment | NA    | 0    |
| S7-final-viral-combined_k141_153186  | [full]    | 1135  | No  | NA | 0    | 2 | Not-determined | Genome-fragment | NA    | 0    |
| S7-final-viral-combined_k141_122549  | [full]    | 14133 | No  | NA | 0    | 3 | Not-determined | Genome-fragment | NA    | 0    |
| S3-final-viral-combined_k141_129973  | [full]    | 1795  | No  | NA | 0    | 2 | Low-quality    | Genome-fragment | 3.46  | 0    |
| S7-final-viral-combined_k141_204352  | [full]    | 2318  | No  | NA | 0    | 2 | Not-determined | Genome-fragment | NA    | 0    |
| S7-final-viral-combined_k141_51090   | [full]    | 1105  | No  | NA | 0    | 1 | Not-determined | Genome-fragment | NA    | 0    |
| S7-final-viral-combined_k141_204265  | [full]    | 1340  | No  | NA | 0    | 2 | Not-determined | Genome-fragment | NA    | 0    |
| S7-final-viral-combined_k141_178304  | [full]    | 3574  | No  | NA | 0    | 0 | Not-determined | Genome-fragment | NA    | 0    |
| S5-final-viral-combined_k141_1783    |           |       |     |    |      |   |                |                 |       |      |



|                                       |          |       |     |       |    |    |                |                 |       |       |
|---------------------------------------|----------|-------|-----|-------|----|----|----------------|-----------------|-------|-------|
| 57-final-viral-combined_k141_920321   | [full]   | 1319  | No  | NA    | 0  | 2  | Not-determined | Genome-fragment | NA    | 0     |
| 57-final-viral-combined_k141_204841   | [full]   | 5740  | No  | NA    | 2  | 0  | Not-determined | Genome-fragment | NA    | 0     |
| 57-final-viral-combined_k141_1022601  | [full]   | 1364  | No  | NA    | 0  | 2  | Not-determined | Genome-fragment | NA    | 0     |
| 57-final-viral-combined_k141_2079021  | [full]   | 1797  | No  | NA    | 0  | 0  | Low-quality    | Genome-fragment | 4.35  | 0     |
| 57_k141_195889                        |          | 1797  | No  | NA    | 0  | 1  | Low-quality    | Genome-fragment | 0.31  | 0     |
| 55-final-viral-combined_k141_638591   | [full]   | 1798  | No  | NA    | 0  | 2  | Low-quality    | Genome-fragment | 1.28  | 0     |
| 57-final-viral-combined_k141_2146351  | [full]   | 1405  | No  | NA    | 0  | 0  | Not-determined | Genome-fragment | NA    | 0     |
| 57-final-viral-combined_k141_205151   | [full]   | 4707  | No  | NA    | 0  | 3  | Not-determined | Genome-fragment | NA    | 0     |
| 55-final-viral-combined_k141_2257121  | [full]   | 1798  | No  | NA    | 0  | 0  | Low-quality    | Genome-fragment | 3     | 0     |
| 57-final-viral-combined_k141_2291     | [full]   | 4328  | No  | NA    | 0  | 2  | Not-determined | Genome-fragment | NA    | 0     |
| 512-final-viral-combined_k141_2258551 | [full]   | 1798  | No  | NA    | 0  | 1  | Low-quality    | Genome-fragment | 1.21  | 0     |
| 57-final-viral-combined_k141_1328261  | [full]   | 1217  | No  | NA    | 0  | 1  | Not-determined | Genome-fragment | NA    | 1.58  |
| 512-final-viral-combined_k141_1433871 | [full]   | 1798  | No  | NA    | 0  | 3  | Low-quality    | Genome-fragment | NA    | 0     |
| 57-final-viral-combined_k141_920691   | [full]   | 1129  | No  | NA    | 0  | 1  | Not-determined | Genome-fragment | NA    | 0     |
| 512_k141_107653                       |          | 1798  | No  | NA    | 0  | 1  | Low-quality    | Genome-fragment | 0.67  | 0     |
| 54-final-viral-combined_k141_190541   | [full]   | 1798  | No  | NA    | 0  | 1  | Low-quality    | Genome-fragment | 2.66  | 0     |
| 57-final-viral-combined_k141_1328421  | [full]   | 1529  | No  | NA    | 0  | 0  | Not-determined | Genome-fragment | NA    | 0     |
| 56-final-viral-combined_k141_1251791  | [full]   | 1798  | No  | NA    | 3  | 0  | Low-quality    | Genome-fragment | 2.93  | 0     |
| 58-final-viral-combined_k141_1990281  | [full]   | 1798  | No  | NA    | 0  | 0  | Low-quality    | Genome-fragment | 2.48  | 0     |
| 57-final-viral-combined_k141_715921   | [full]   | 38751 | Yes | 27062 | 20 | 8  | Medium-quality | Genome-fragment | 78.69 | 30.16 |
| 57-final-viral-combined_k141_2561     | [full]   | 1576  | No  | NA    | 0  | 1  | Not-determined | Genome-fragment | NA    | 1.48  |
| 59-final-viral-combined_k141_234811   | [full]   | 1799  | No  | NA    | 0  | 1  | Low-quality    | Genome-fragment | NA    | 0     |
| 57-final-viral-combined_k141_1125601  | [full]   | 4540  | No  | NA    | 0  | 3  | Not-determined | Genome-fragment | NA    | 0     |
| 511-final-viral-combined_k141_1963951 | [full]   | 1799  | No  | NA    | 0  | 0  | Low-quality    | Genome-fragment | 3.75  | 0     |
| 57-final-viral-combined_k141_307931   | [full]   | 1263  | No  | NA    | 0  | 0  | Not-determined | Genome-fragment | NA    | 0     |
| 57-final-viral-combined_k141_235091   | [full]   | 1620  | No  | NA    | 0  | 1  | Not-determined | Genome-fragment | NA    | 0     |
| 511-final-viral-combined_k141_65601   | [full]   | 1799  | No  | NA    | 0  | 1  | Low-quality    | Genome-fragment | 4.07  | 0     |
| 511-final-viral-combined_k141_303481  | [full]   | 1799  | No  | NA    | 3  | 0  | Low-quality    | Genome-fragment | 4.24  | 0     |
| 511-final-viral-combined_k141_2376091 | [H2gene] | 1799  | No  | NA    | 0  | 0  | Low-quality    | Genome-fragment | 3.93  | 0     |
| 57-final-viral-combined_k141_103311   | [full]   | 4641  | No  | NA    | 0  | 3  | Not-determined | Genome-fragment | NA    | 0     |
| 57-final-viral-combined_k141_214721   | [full]   | 8425  | No  | NA    | 0  | 5  | Not-determined | Genome-fragment | NA    | 0     |
| 57-final-viral-combined_k141_1126271  | [full]   | 3346  | No  | NA    | 0  | 2  | Not-determined | Genome-fragment | NA    | 0     |
| 57-final-viral-combined_k141_205681   | [full]   | 3193  | No  | NA    | 0  | 2  | Not-determined | Genome-fragment | NA    | 0     |
| 51-final-viral-combined_k141_522561   | [full]   | 1799  | No  | NA    | 0  | 2  | Low-quality    | Genome-fragment | 3.14  | 0     |
| 57-final-viral-combined_k141_1227981  | [full]   | 2687  | No  | NA    | 0  | 0  | Not-determined | Genome-fragment | NA    | 0     |
| 57-final-viral-combined_k141_1328401  | [full]   | 1549  | No  | NA    | 0  | 1  | Not-determined | Genome-fragment | NA    | 0     |
| 57-final-viral-combined_k141_1329521  | [full]   | 1463  | No  | NA    | 0  | 2  | Not-determined | Genome-fragment | NA    | 0     |
| 57-final-viral-combined_k141_204441   | [full]   | 4470  | No  | NA    | 0  | 3  | Not-determined | Genome-fragment | NA    | 0     |
| 57-final-viral-combined_k141_1738461  | [full]   | 9774  | No  | NA    | 0  | 2  | Not-determined | Genome-fragment | NA    | 0     |
| 57-final-viral-combined_k141_2249541  | [full]   | 4180  | No  | NA    | 0  | 1  | Not-determined | Genome-fragment | NA    | 0     |
| 57-final-viral-combined_k141_1943001  | [full]   | 1235  | No  | NA    | 0  | 0  | Not-determined | Genome-fragment | NA    | 0     |
| 517-final-viral-combined_k141_2369761 | [full]   | 1799  | No  | NA    | 0  | 1  | Low-quality    | Genome-fragment | 0.61  | 0     |
| 57-final-viral-combined_k141_206051   | [full]   | 1508  | No  | NA    | 0  | 0  | Not-determined | Genome-fragment | NA    | 0     |
| 57-final-viral-combined_k141_13201    | [full]   | 1372  | No  | NA    | 0  | 0  | Not-determined | Genome-fragment | NA    | 0     |
| 57-final-viral-combined_k141_81801    | [full]   | 1280  | No  | NA    | 0  | 1  | Not-determined | Genome-fragment | NA    | 0     |
| 52-final-viral-combined_k141_1373031  | [full]   | 1799  | No  | NA    | 0  | 1  | Low-quality    | Genome-fragment | 0.44  | 0     |
| 54-final-viral-combined_k141_677401   | [full]   | 1799  | No  | NA    | 0  | 2  | Low-quality    | Genome-fragment | 2.44  | 0     |
| 57-final-viral-combined_k141_1534341  | [full]   | 1655  | No  | NA    | 0  | 1  | Not-determined | Genome-fragment | NA    | 4.47  |
| 511-final-viral-combined_k141_84541   | [full]   | 1800  | No  | NA    | 0  | 1  | Low-quality    | Genome-fragment | 91.18 | 0     |
| 57-final-viral-combined_k141_2351651  | [full]   | 31876 | No  | NA    | 14 | 0  | High-quality   | High-quality    | 91.18 | 0     |
| 57-final-viral-combined_k141_206501   | [full]   | 1024  | No  | NA    | 0  | 0  | Not-determined | Genome-fragment | NA    | 0     |
| 57-final-viral-combined_k141_206541   | [full]   | 1525  | No  | NA    | 0  | 1  | Not-determined | Genome-fragment | NA    | 0     |
| 57-final-viral-combined_k141_194391   | [full]   | 1602  | No  | NA    | 0  | 1  | Not-determined | Genome-fragment | NA    | 0     |
| 57-final-viral-combined_k141_1330201  | [full]   | 1655  | No  | NA    | 0  | 0  | Not-determined | Genome-fragment | NA    | 0     |
| 57-final-viral-combined_k141_1330251  | [full]   | 5175  | No  | NA    | 0  | 2  | Not-determined | Genome-fragment | NA    | 0     |
| 51-final-viral-combined_k141_3528391  | [full]   | 1800  | No  | NA    | 0  | 0  | Low-quality    | Genome-fragment | 2.41  | 0     |
| 57-final-viral-combined_k141_819371   | [full]   | 4016  | No  | NA    | 0  | 3  | Not-determined | Genome-fragment | NA    | 3.65  |
| 57_k141_97008                         |          | 1800  | No  | NA    | 0  | 0  | Low-quality    | Genome-fragment | NA    | 0     |
| 57-final-viral-combined_k141_1638301  | [full]   | 1800  | No  | NA    | 0  | 3  | Not-determined | Genome-fragment | NA    | 0     |
| 57-final-viral-combined_k141_616331   | [full]   | 1671  | No  | NA    | 0  | 0  | Not-determined | Genome-fragment | NA    | 0     |
| 57-final-viral-combined_k141_1793881  | [full]   | 2145  | No  | NA    | 0  | 2  | Not-determined | Genome-fragment | NA    | 0     |
| 57-final-viral-combined_k141_2250681  | [full]   | 2019  | No  | NA    | 0  | 3  | Not-determined | Genome-fragment | NA    | 0     |
| 512-final-viral-combined_k141_2296741 | [full]   | 1800  | No  | NA    | 0  | 0  | Low-quality    | Genome-fragment | 2.75  | 0     |
| 52_k141_190591                        |          | 1800  | No  | NA    | 0  | 2  | Low-quality    | Genome-fragment | 1.21  | 0     |
| 54_k141_136824                        |          | 1800  | No  | NA    | 1  | 0  | Low-quality    | Genome-fragment | 5.03  | 0     |
| 55-final-viral-combined_k141_983051   | [full]   | 1801  | No  | NA    | 0  | 1  | Low-quality    | Genome-fragment | 2.45  | 0     |
| 55-final-viral-combined_k141_614101   | [H2gene] | 1801  | No  | NA    | 1  | 0  | Low-quality    | Genome-fragment | 4.37  | 0     |
| 57-final-viral-combined_k141_1638821  | [full]   | 1200  | No  | NA    | 0  | 1  | Not-determined | Genome-fragment | NA    | 4.11  |
| 512-final-viral-combined_k141_35811   | [full]   | 1801  | No  | NA    | 0  | 1  | Low-quality    | Genome-fragment | 4.21  | 0     |
| 512-final-viral-combined_k141_3558141 | [H2gene] | 1801  | No  | NA    | 2  | 0  | Low-quality    | Genome-fragment | 4.21  | 0     |
| 512-final-viral-combined_k141_1562061 | [H2gene] | 1801  | No  | NA    | 1  | 0  | Low-quality    | Genome-fragment | 5.27  | 0     |
| 512_k141_121419                       |          | 1801  | No  | NA    | 0  | 1  | Low-quality    | Genome-fragment | 3.87  | 0     |
| 52-final-viral-combined_k141_1262171  | [full]   | 1801  | No  | NA    | 3  | 0  | Low-quality    | Genome-fragment | 4.24  | 0     |
| 54-final-viral-combined_k141_1541131  | [full]   | 1801  | No  | NA    | 0  | 0  | Low-quality    | Genome-fragment | 4.34  | 0     |
| 56_k141_89643                         |          | 1801  | No  | NA    | 2  | 0  | Low-quality    | Genome-fragment | 3.52  | 0     |
| 57-final-viral-combined_k141_207071   | [full]   | 2085  | No  | NA    | 0  | 2  | Not-determined | Genome-fragment | NA    | 8.07  |
| 58-final-viral-combined_k141_1980301  | [full]   | 1801  | No  | NA    | 0  | 1  | Low-quality    | Genome-fragment | NA    | 0     |
| 57-final-viral-combined_k141_112861   | [full]   | 1820  | No  | NA    | 0  | 1  | Not-determined | Genome-fragment | NA    | 0     |
| 57-final-viral-combined_k141_163841   | [full]   | 1412  | No  | NA    | 0  | 1  | Not-determined | Genome-fragment | NA    | 1.72  |
| 51-final-viral-combined_k141_465851   | [full]   | 1802  | No  | NA    | 0  | 0  | Low-quality    | Genome-fragment | NA    | 0     |
| 57-final-viral-combined_k141_153671   | [full]   | 1250  | No  | NA    | 0  | 0  | Not-determined | Genome-fragment | NA    | 2.29  |
| 57-final-viral-combined_k141_2251761  | [full]   | 3380  | No  | NA    | 0  | 2  | Not-determined | Genome-fragment | NA    | 2.02  |
| 53-final-viral-combined_k141_922031   | [full]   | 1802  | No  | NA    | 0  | 0  | Low-quality    | Genome-fragment | NA    | 0     |
| 57-final-viral-combined_k141_820431   | [full]   | 2436  | No  | NA    | 0  | 3  | Not-determined | Genome-fragment | NA    | 0     |
| 55-final-viral-combined_k141_1940901  | [full]   | 1802  | No  | NA    | 0  | 1  | Low-quality    | Genome-fragment | NA    | 0     |
| 57-final-viral-combined_k141_2046101  | [full]   | 4266  | No  | NA    | 0  | 2  | Not-determined | Genome-fragment | NA    | 0     |
| 57-final-viral-combined_k141_1331721  | [full]   | 4923  | No  | NA    | 0  | 5  | Not-determined | Genome-fragment | NA    | 0     |
| 57-final-viral-combined_k141_820621   | [full]   | 1235  | No  | NA    | 0  | 0  | Not-determined | Genome-fragment | NA    | 4.65  |
| 55-final-viral-combined_k141_1451841  | [H2gene] | 4802  | No  | NA    | 0  | 0  | Low-quality    | Genome-fragment | NA    | 0     |
| 57-final-viral-combined_k141_1025241  | [full]   | 4408  | No  | NA    | 0  | 1  | Not-determined | Genome-fragment | NA    | 1.07  |
| 57-final-viral-combined_k141_2354021  | [full]   | 3683  | No  | NA    | 0  | 0  | Not-determined | Genome-fragment | NA    | 0     |
| 55_k141_100139                        |          | 1802  | No  | NA    | 0  | 0  | Low-quality    | Genome-fragment | NA    | 0     |
| 57-final-viral-combined_k141_1946441  | [full]   | 5677  | No  | NA    | 0  | 0  | Not-determined | Genome-fragment | NA    | 3.09  |
| 57-final-viral-combined_k141_2227851  | [full]   | 1802  | No  | NA    | 0  | 0  | Low-quality    | Genome-fragment | NA    | 0     |
| 57-final-viral-combined_k141_1740761  | [full]   | 2638  | No  | NA    | 0  | 1  | Not-determined | Genome-fragment | NA    | 0     |
| 57-final-viral-combined_k141_1946561  | [full]   | 2800  | No  | NA    | 0  | 1  | Not-determined | Genome-fragment | NA    | 0     |
| 57-final-viral-combined_k141_2252601  | [full]   | 15940 | No  | NA    | 7  | 0  | High-quality   | High-quality    | 100   | 0     |
| 512-final-viral-combined_k141_309311  | [full]   | 1802  | No  | NA    | 0  | 0  | Low-quality    | Genome-fragment | NA    | 1.22  |
| 57-final-viral-combined_k141_1228441  | [full]   | 1802  | No  | NA    | 0  | 16 | Not-determined | Genome-fragment | NA    | 0     |
| 57-final-viral-combined_k141_110681   | [full]   | 27877 | Yes | 18895 | 7  | 6  | Medium-quality | Genome-fragment | 53.79 | 32.22 |
| 52-final-viral-combined_k141_1621001  | [full]   | 1802  | No  | NA    | 0  | 2  | Low-quality    | Genome-fragment | 0.79  | 0     |
| 52_k141_83872                         |          | 1802  | No  | NA    | 0  | 0  | Low-quality    | Genome-fragment | 2.79  | 0     |
| 57-final-viral-combined_k141_717841   | [full]   | 3130  | No  | NA    | 0  | 0  | Not-determined | Genome-fragment | NA    | 0     |
| 59_k141_14273                         |          | 1803  | No  | NA    | 0  | 0  | Low-quality    | Genome-fragment | NA    | 3.24  |
| 57-final-viral-combined_k141_934091   | [full]   | 1303  | No  | NA    | 0  | 1  | Not-determined | Genome-fragment | NA    | 0     |
| 55-final-viral-combined_k141_2122581  | [full]   | 1803  | No  | NA    | 0  | 0  | Low-quality    | Genome-fragment | 3.11  | 0     |
| 57-final-viral-combined_k141_2560451  | [full]   | 1803  | No  | NA    | 1  | 0  | Low-quality    | Genome-fragment | 4.72  | 0     |
| 57-final-viral-combined_k141_821591   | [full]   | 1549  | No  | NA    | 0  | 1  | Not-determined | Genome-fragment | NA    | 0     |
| 57-final-viral-combined_k141_60501    | [full]   | 1247  | No  | NA    | 0  | 2  | Not-determined | Genome-fragment | NA    | 0     |
| 57-final-viral-combined_k141_2251261  | [full]   | 2542  | No  | NA    | 0  | 2  | Not-determined | Genome-fragment | NA    | 0     |
| 57-final-viral-combined_k141_208601   | [full]   | 2667  | No  | NA    | 0  | 0  | Not-determined | Genome-fragment | NA    | 2.57  |
| 512-final-viral-combined_k141_3779621 | [full]   | 1803  | No  | NA    | 0  | 0  | Low-quality    | Genome-fragment | NA    | 0     |
| 57-final-viral-combined_k141_208651   | [full]   | 1618  | No  | NA    | 0  | 1  | Not-determined | Genome-fragment | NA    | 0     |
| 57-final-viral-combined_k141_6301     | [full]   | 1325  | No  | NA    | 0  | 0  | Not-determined | Genome-fragment | NA    | 0     |
| 57-final-viral-combined_k141_2251441  | [full]   | 1790  | No  | NA    | 0  | 2  | Not-determined | Genome-fragment | NA    | 0     |
| 57-final-viral-combined_k141_618741   | [full]   | 1657  | No  | NA    | 0  | 1  | Not-determined | Genome-fragment | NA    | 0     |
| 57-final-viral-combined_k141_2253571  | [full]   | 2550  | No  | NA    | 0  | 3  | Not-determined | Genome-fragment | NA    | 0     |
| 52-final-viral-combined_k141_2025521  | [full]   | 1803  | No  | NA    | 1  | 1  | Low-quality    | Genome-fragment | NA    | 1.22  |
| 57-final-viral-combined_k141_412651   | [full]   | 23836 | No  | NA    | 0  | 16 | Not-determined | Genome-fragment | NA    | 0     |
| 57-final-viral-combined_k141_2150821  | [full]   | 2483  | No  | NA    | 0  | 2  | Not-determined | Genome-fragment | NA    | 0     |
| 57-final-viral-combined_k141_8611     | [full]   | 1369  | No  | NA    | 0  | 0  | Not-determined | Genome-fragment | NA    | 0     |
| 57-final-viral-combined_k141_1026551  | [full]   | 2095  | No  | NA    | 0  | 2  | Not-determined | Genome-fragment | NA    | 0     |
| 57-final-viral-combined_k141_2151011  | [full]   | 2682  | No  | NA    | 0  | 0  | Not-determined | Genome-fragment | NA    | 0     |
| 57-final-viral-combined_k141_1026661  | [full]   | 1079  | No  | NA    | 0  | 0  | Not-determined | Genome-fragment | NA    | 0     |
| 58-final-viral-combined_k141_1593701  | [full]   | 1803  | No  | NA    | 0  | 0  | Low-quality    | Genome-fragment | 0.28  | 0     |
| 511-final-viral-combined_k141_2309291 | [full]   | 1804  | No  | NA    | 0  | 2  | Low-quality    | Genome-fragment | 0.69  | 0     |
| 57-final-viral-combined_k141_1348331  | [full]   | 8159  | No  | NA    | 0  | 3  | Not-determined | Genome-fragment | NA    | 0     |
| 57-final-viral-combined_k141_208791   | [full]</ |       |     |       |    |    |                |                 |       |       |



|                                       |          |        |     |    |       |    |                |                 |                 |       |       |
|---------------------------------------|----------|--------|-----|----|-------|----|----------------|-----------------|-----------------|-------|-------|
| 59-final-viral-combined_k141_705371   | [full]   | 1806   | No  | NA | 0     | 1  | Low-quality    | Genome-fragment | 0.9             | 0     |       |
| 57-final-viral-combined_k141_254801   | [full]   | 1035   | No  | NA | 0     | 1  | Not-determined | Genome-fragment | NA              | 0     |       |
| 59-final-viral-combined_k141_851021   | [full]   | 1806   | No  | NA | 3     | 0  | Low-quality    | Genome-fragment | 5.31            | 0     |       |
| 53_k141_32012                         |          | 1806   | No  | NA | 1     | 0  | Low-quality    | Genome-fragment | 4.31            | 0     |       |
| 57-final-viral-combined_k141_109231   | [full]   | 9075   | No  | NA | 0     | 1  | Not-determined | Genome-fragment | NA              | 0     |       |
| 512-final-viral-combined_k141_390401  | [full]   | 1806   | No  | NA | 0     | 0  | Low-quality    | Genome-fragment | 4.03            | 0     |       |
| 57-final-viral-combined_k141_414451   | [full]   | 4885   | No  | NA | 0     | 0  | Not-determined | Genome-fragment | NA              | 0     |       |
| 52-final-viral-combined_k141_122231   | [full]   | 1806   | No  | NA | 0     | 1  | Low-quality    | Genome-fragment | 2.95            | 0     |       |
| 57-final-viral-combined_k141_925541   | [full]   | 7718   | No  | NA | 0     | 0  | Not-determined | Genome-fragment | NA              | 0     |       |
| 57-final-viral-combined_k141_209751   | [full]   | 1007   | No  | NA | 0     | 1  | Not-determined | Genome-fragment | NA              | 0     |       |
| 57-final-viral-combined_k141_2050091  | [full]   | 2644   | No  | NA | 0     | 1  | Not-determined | Genome-fragment | NA              | 0     |       |
| 56_k141_81800                         |          | 1806   | No  | NA | 0     | 2  | Low-quality    | Genome-fragment | 1.18            | 0     |       |
| 511-final-viral-combined_k141_310271  | [full]   | 1807   | No  | NA | 3     | 0  | Low-quality    | Genome-fragment | 4.31            | 0     |       |
| 511-final-viral-combined_k141_118831  | [full]   | 1807   | No  | NA | 0     | 0  | Low-quality    | Genome-fragment | 3.61            | 0     |       |
| 57-final-viral-combined_k141_2050241  | [full]   | 5020   | No  | NA | 0     | 5  | Not-determined | Genome-fragment | NA              | 0     |       |
| 57-final-viral-combined_k141_517241   | [full]   | 3370   | No  | NA | 0     | 2  | Not-determined | Genome-fragment | NA              | 0     |       |
| 57-final-viral-combined_k141_314231   | [full]   | 1307   | No  | NA | 0     | 0  | Not-determined | Genome-fragment | NA              | 0     |       |
| 57-final-viral-combined_k141_314291   | [full]   | 2229   | No  | NA | 0     | 0  | Not-determined | Genome-fragment | NA              | 0     |       |
| 51-final-viral-combined_k141_200851   | [full]   | 1807   | No  | NA | 0     | 0  | Low-quality    | Genome-fragment | 4.09            | 0     |       |
| 51-final-viral-combined_k141_279928   | [H2gene] | 1807   | No  | NA | 1     | 0  | Low-quality    | Genome-fragment | 5.41            | 0     |       |
| 57-final-viral-combined_k141_51741    | [full]   | 5096   | No  | NA | 0     | 4  | Not-determined | Genome-fragment | NA              | 0     |       |
| 57-final-viral-combined_k141_415191   | [full]   | 1284   | No  | NA | 0     | 2  | Not-determined | Genome-fragment | NA              | 0     |       |
| 512-final-viral-combined_k141_148908  | [full]   | 1807   | No  | NA | 3     | 0  | Low-quality    | Genome-fragment | 4.64            | 0     |       |
| 56-final-viral-combined_k141_130271   | [full]   | 1807   | No  | NA | 0     | 2  | Low-quality    | Genome-fragment | 1.29            | 0     |       |
| 57-final-viral-combined_k141_110361   | [full]   | 1051   | No  | NA | 0     | 0  | Not-determined | Genome-fragment | NA              | 0     |       |
| 57-final-viral-combined_k141_1846321  | [full]   | 6503   | No  | NA | 0     | 2  | Not-determined | Genome-fragment | NA              | 0     |       |
| 57-final-viral-combined_k141_2357861  | [full]   | 2971   | No  | NA | 0     | 0  | Not-determined | Genome-fragment | NA              | 0     |       |
| 57-final-viral-combined_k141_1846551  | [full]   | 2889   | No  | NA | 0     | 2  | Not-determined | Genome-fragment | NA              | 0     |       |
| 57-final-viral-combined_k141_2050841  | [full]   | 4118   | No  | NA | 0     | 2  | Not-determined | Genome-fragment | NA              | 0     |       |
| 59-final-viral-combined_k141_57301    | [full]   | 1808   | No  | NA | 0     | 1  | Low-quality    | Genome-fragment | 1.39            | 0     |       |
| 57-final-viral-combined_k141_110681   | [full]   | 1566   | No  | NA | 0     | 1  | Not-determined | Genome-fragment | NA              | 0     |       |
| 57-final-viral-combined_k141_8240481  | [full]   | 1340   | No  | NA | 0     | 0  | Not-determined | Genome-fragment | NA              | 0     |       |
| 55-final-viral-combined_k141_933851   | [full]   | 1808   | No  | NA | 0     | 0  | Low-quality    | Genome-fragment | 3.83            | 0     |       |
| 517-final-viral-combined_k141_377981  | [full]   | 1808   | No  | NA | 0     | 1  | Low-quality    | Genome-fragment | 0.43            | 0     |       |
| 52-final-viral-combined_k141_308731   | [full]   | 1808   | No  | NA | 0     | 0  | Low-quality    | Genome-fragment | 2.73            | 0     |       |
| 57-final-viral-combined_k141_1358141  | [full]   | 5272   | No  | NA | 0     | 0  | Not-determined | Genome-fragment | NA              | 0     |       |
| 57-final-viral-combined_k141_2051321  | [full]   | 5144   | No  | NA | 0     | 2  | Not-determined | Genome-fragment | NA              | 0     |       |
| 57-final-viral-combined_k141_210751   | [full]   | 2371   | No  | NA | 0     | 1  | Not-determined | Genome-fragment | NA              | 0     |       |
| 57-final-viral-combined_k141_824381   | [full]   | 2480   | No  | NA | 0     | 1  | Not-determined | Genome-fragment | NA              | 0     |       |
| 54-final-viral-combined_k141_757231   | [full]   | 1808   | No  | NA | 0     | 2  | Low-quality    | Genome-fragment | 0.92            | 0     |       |
| 57-final-viral-combined_k141_2051431  | [full]   | 6742   | No  | NA | 0     | 6  | Not-determined | Genome-fragment | NA              | 0     |       |
| 57-final-viral-combined_k141_2358751  | [full]   | 5412   | No  | NA | 0     | 0  | Not-determined | Genome-fragment | NA              | 0     |       |
| 511-final-viral-combined_k141_1363561 | [full]   | 1809   | No  | NA | 0     | 0  | Low-quality    | Genome-fragment | 3.02            | 0     |       |
| 51-final-viral-combined_k141_426051   | [full]   | 1809   | No  | NA | 0     | 0  | Low-quality    | Genome-fragment | 3.78            | 0     |       |
| 57-final-viral-combined_k141_518661   | [full]   | 1649   | No  | NA | 0     | 0  | Not-determined | Genome-fragment | NA              | 0     |       |
| 57-final-viral-combined_k141_235841   | [full]   | 4940   | No  | NA | 0     | 0  | Not-determined | Genome-fragment | NA              | 0     |       |
| 57-final-viral-combined_k141_2358591  | [full]   | 1404   | No  | NA | 0     | 1  | Not-determined | Genome-fragment | NA              | 0     |       |
| 57-final-viral-combined_k141_1952181  | [full]   | 1841   | No  | NA | 0     | 5  | Not-determined | Genome-fragment | NA              | 0     |       |
| 57-final-viral-combined_k141_1436061  | [full]   | 1527   | No  | NA | 0     | 1  | Not-determined | Genome-fragment | NA              | 0     |       |
| 53-final-viral-combined_k141_135571   | [full]   | 1809   | No  | NA | 0     | 0  | Low-quality    | Genome-fragment | 3.78            | 0     |       |
| 57-final-viral-combined_k141_1436201  | [full]   | 2769   | No  | NA | 0     | 0  | Not-determined | Genome-fragment | NA              | 0     |       |
| 57-final-viral-combined_k141_215551   | [full]   | 2441   | No  | NA | 0     | 2  | Not-determined | Genome-fragment | NA              | 0     |       |
| 57-final-viral-combined_k141_2256001  | [full]   | 1326   | No  | NA | 0     | 1  | Not-determined | Genome-fragment | NA              | 0     |       |
| 57-final-viral-combined_k141_1743551  | [full]   | 2907   | No  | NA | 0     | 3  | Not-determined | Genome-fragment | NA              | 0     |       |
| 57-final-viral-combined_k141_2051971  | [full]   | 2849   | No  | NA | 0     | 0  | Not-determined | Genome-fragment | NA              | 0     |       |
| 53_k141_133911                        |          | 1809   | No  | NA | 0     | 0  | Low-quality    | Genome-fragment | 0.83            | 0     |       |
| 57-final-viral-combined_k141_1743781  | [full]   | 2715   | No  | NA | 0     | 1  | Not-determined | Genome-fragment | NA              | 0     |       |
| 55-final-viral-combined_k141_924481   | [full]   | 1809   | No  | NA | 0     | 0  | Low-quality    | Genome-fragment | 4.03            | 0     |       |
| 55-final-viral-combined_k141_1368431  | [full]   | 1809   | No  | NA | 0     | 0  | Low-quality    | Genome-fragment | 2.56            | 0     |       |
| 57-final-viral-combined_k141_1743921  | [full]   | 3981   | No  | NA | 0     | 1  | Not-determined | Genome-fragment | NA              | 0     |       |
| 57-final-viral-combined_k141_1234991  | [full]   | 4003   | No  | NA | 0     | 2  | Not-determined | Genome-fragment | NA              | 0     |       |
| 517-final-viral-combined_k141_274701  | [full]   | 1809   | No  | NA | 0     | 0  | Low-quality    | Genome-fragment | 5.08            | 0     |       |
| 512-final-viral-combined_k141_2568191 | [full]   | 1809   | No  | NA | 1     | 0  | Low-quality    | Genome-fragment | 3.14            | 0     |       |
| 57-final-viral-combined_k141_2258851  | [full]   | 1634   | No  | NA | 0     | 0  | Not-determined | Genome-fragment | NA              | 0     |       |
| 512-final-viral-combined_k141_2411771 | [full]   | 1809   | No  | NA | 0     | 0  | Low-quality    | Genome-fragment | 5.24            | 0     |       |
| 57-final-viral-combined_k141_1744181  | [full]   | 2746   | No  | NA | 0     | 1  | Not-determined | Genome-fragment | NA              | 0     |       |
| 57-final-viral-combined_k141_1848721  | [full]   | 7850   | No  | NA | 0     | 0  | Not-determined | Genome-fragment | NA              | 0     |       |
| 57-final-viral-combined_k141_1337941  | [full]   | 2520   | No  | NA | 0     | 0  | Not-determined | Genome-fragment | NA              | 0     |       |
| 57-final-viral-combined_k141_1952751  | [full]   | 7349   | No  | NA | 0     | 0  | Not-determined | Genome-fragment | NA              | 0     |       |
| 59-final-viral-combined_k141_642901   | [full]   | 1810   | No  | NA | 2     | 0  | Low-quality    | Genome-fragment | 4.16            | 0     |       |
| 57-final-viral-combined_k141_1028331  | [full]   | 1238   | No  | NA | 0     | 0  | Not-determined | Genome-fragment | NA              | 0     |       |
| 511-final-viral-combined_k141_286791  | [full]   | 1810   | No  | NA | 0     | 0  | Low-quality    | Genome-fragment | 1.24            | 0     |       |
| 57-final-viral-combined_k141_416501   | [full]   | 2790   | No  | NA | 0     | 1  | Not-determined | Genome-fragment | NA              | 0     |       |
| 57-final-viral-combined_k141_621191   | [full]   | 303278 | Yes | NA | 64190 | 14 | 142            | Medium-quality  | Genome-fragment | 57.57 | 78.83 |
| 51-final-viral-combined_k141_1215141  | [full]   | 1810   | No  | NA | 0     | 0  | 0              | Low-quality     | Genome-fragment | 1.13  | 0     |
| 57-final-viral-combined_k141_1235141  | [full]   | 1209   | No  | NA | 0     | 2  | Not-determined | Genome-fragment | NA              | 0     |       |
| 57-final-viral-combined_k141_1338091  | [full]   | 14109  | No  | NA | 0     | 8  | Not-determined | Genome-fragment | NA              | 0     |       |
| 57-final-viral-combined_k141_826031   | [full]   | 4059   | No  | NA | 0     | 4  | 4              | Not-determined  | Genome-fragment | NA    | 0     |
| 57-final-viral-combined_k141_821551   | [full]   | 4972   | No  | NA | 0     | 4  | 4              | Not-determined  | Genome-fragment | NA    | 0     |
| 57-final-viral-combined_k141_821621   | [full]   | 2304   | No  | NA | 0     | 1  | Not-determined | Genome-fragment | NA              | 0     |       |
| 57-final-viral-combined_k141_1744891  | [full]   | 1122   | No  | NA | 0     | 1  | Not-determined | Genome-fragment | NA              | 0     |       |
| 51-final-viral-combined_k141_1903171  | [full]   | 1810   | No  | NA | 0     | 0  | Low-quality    | Genome-fragment | 1.34            | 0     |       |
| 56-final-viral-combined_k141_1356841  | [full]   | 1810   | No  | NA | 0     | 0  | Low-quality    | Genome-fragment | 4.43            | 0     |       |
| 57-final-viral-combined_k141_2257561  | [full]   | 3832   | No  | NA | 0     | 4  | 4              | Not-determined  | Genome-fragment | NA    | 0     |
| 58-final-viral-combined_k141_2166581  | [full]   | 1810   | No  | NA | 0     | 0  | Low-quality    | Genome-fragment | 4.66            | 0     |       |
| 512-final-viral-combined_k141_257775  | [H2gene] | 1811   | No  | NA | 1     | 0  | Low-quality    | Genome-fragment | 4.55            | 0     |       |
| 52-final-viral-combined_k141_1340691  | [full]   | 1811   | No  | NA | 0     | 0  | Low-quality    | Genome-fragment | 2.9             | 0     |       |
| 54-final-viral-combined_k141_165101   | [H2gene] | 1811   | No  | NA | 1     | 0  | Low-quality    | Genome-fragment | 1.84            | 0     |       |
| 57-final-viral-combined_k141_211591   | [full]   | 2627   | No  | NA | 0     | 2  | Not-determined | Genome-fragment | NA              | 0     |       |
| 57-final-viral-combined_k141_1029071  | [full]   | 4668   | No  | NA | 0     | 5  | 5              | Not-determined  | Genome-fragment | NA    | 0     |
| 57-final-viral-combined_k141_1645171  | [full]   | 3718   | No  | NA | 0     | 2  | 2              | Not-determined  | Genome-fragment | NA    | 0     |
| 57-final-viral-combined_k141_113061   | [full]   | 16792  | No  | NA | 0     | 8  | 8              | Not-determined  | Genome-fragment | NA    | 0     |
| 56-final-viral-combined_k141_344931   | [full]   | 1811   | No  | NA | 0     | 1  | Low-quality    | Genome-fragment | 3.12            | 0     |       |
| 511-final-viral-combined_k141_1137581 | [full]   | 1812   | No  | NA | 0     | 0  | Low-quality    | Genome-fragment | 3.77            | 0     |       |
| 51-final-viral-combined_k141_58588    | [H2gene] | 1812   | No  | NA | 1     | 0  | Low-quality    | Genome-fragment | 3.95            | 0     |       |
| 51_k141_95726                         |          | 1812   | No  | NA | 0     | 2  | Low-quality    | Genome-fragment | 0.41            | 0     |       |
| 57-final-viral-combined_k141_211891   | [full]   | 2217   | No  | NA | 0     | 2  | 2              | Not-determined  | Genome-fragment | NA    | 0     |
| 51_k141_180813                        |          | 1812   | No  | NA | 0     | 1  | Low-quality    | Genome-fragment | 0.49            | 0     |       |
| 57-final-viral-combined_k141_2055191  | [full]   | 2028   | No  | NA | 0     | 1  | Not-determined | Genome-fragment | NA              | 0     |       |
| 51_k141_114291                        |          | 1812   | Yes | NA | 572   | 1  | 1              | Low-quality     | Genome-fragment | 0.94  | 68.43 |
| 512-final-viral-combined_k141_241401  | [full]   | 1812   | No  | NA | 2     | 0  | 0              | Low-quality     | Genome-fragment | 5.64  | 0     |
| 57-final-viral-combined_k141_205531   | [full]   | 2829   | No  | NA | 0     | 0  | 0              | Not-determined  | Genome-fragment | NA    | 0     |
| 57-final-viral-combined_k141_1850101  | [full]   | 3099   | No  | NA | 0     | 2  | 2              | Not-determined  | Genome-fragment | NA    | 0     |
| 57-final-viral-combined_k141_118031   | [full]   | 4770   | No  | NA | 0     | 1  | 1              | Not-determined  | Genome-fragment | NA    | 0     |
| 57-final-viral-combined_k141_2258831  | [full]   | 2985   | No  | NA | 0     | 1  | 1              | Not-determined  | Genome-fragment | NA    | 0     |
| 52-final-viral-combined_k141_149891   | [full]   | 1812   | No  | NA | 1     | 0  | 0              | Low-quality     | Genome-fragment | 3.38  | 0     |
| 54-final-viral-combined_k141_449831   | [full]   | 1812   | No  | NA | 0     | 2  | 2              | Low-quality     | Genome-fragment | 4.09  | 0     |
| 57-final-viral-combined_k141_2258921  | [full]   | 1408   | No  | NA | 0     | 3  | 3              | Not-determined  | Genome-fragment | NA    | 0     |
| 54_k141_42353                         |          | 1812   | No  | NA | 0     | 0  | 0              | Low-quality     | Genome-fragment | 1.9   | 0     |
| 57-final-viral-combined_k141_62231    | [full]   | 1513   | No  | NA | 0     | 1  | 1              | Not-determined  | Genome-fragment | NA    | 0     |
| 57-final-viral-combined_k141_1136361  | [full]   | 2352   | No  | NA | 0     | 0  | 0              | Not-determined  | Genome-fragment | NA    | 0     |
| 57-final-viral-combined_k141_1438721  | [full]   | 2711   | No  | NA | 0     | 2  | 2              | Not-determined  | Genome-fragment | NA    | 0     |
| 57-final-viral-combined_k141_822471   | [full]   | 1741   | No  | NA | 0     | 0  | 0              | Not-determined  | Genome-fragment | NA    | 0     |
| 57-final-viral-combined_k141_118221   | [full]   | 2903   | No  | NA | 0     | 2  | 2              | Not-determined  | Genome-fragment | NA    | 0     |
| 57-final-viral-combined_k141_1438741  | [full]   | 2159   | No  | NA | 0     | 2  | 2              | Not-determined  | Genome-fragment | NA    | 0     |
| 56-final-viral-combined_k141_272831   | [full]   | 1812   | No  | NA | 0     | 1  | Low-quality    | Genome-fragment | 1.07            | 0     |       |
| 58_k141_61519                         |          | 1812   | No  | NA | 1     | 0  | 0              | Low-quality     | Genome-fragment | 27.72 | 0     |
| 57-final-viral-combined_k141_1850161  | [full]   | 41583  | Yes | NA | 30248 | 12 | 12             | High-quality    | High-quality    | 93.16 | 27.26 |
| 57-final-viral-combined_k141_212541   | [full]   | 6969   | No  | NA | 0     | 0  | 0              | Not-determined  | Genome-fragment | NA    | 0     |
| 57-final-viral-combined_k141_1030521  | [full]   | 8843   | No  | NA | 0     | 3  | 3              | Not-determined  | Genome-fragment | NA    | 0     |
| 57-final-viral-combined_k141_185031   | [full]   | 1534   | No  | NA | 0     | 1  | 1              | Not-determined  | Genome-fragment | NA    | 0     |
| 55-final-viral-combined_k141_1691461  | [full]   | 1813   | No  | NA | 0     | 0  | 0              | Low-quality     | Genome-fragment | 4.01  | 0     |
| 57-final-viral-combined_k141_1339761  | [full]   | 11629  | No  | NA | 0     | 4  | 4              | Not-determined  | Genome-fragment | NA    | 0     |
| 57-final-viral-combined_k141_1747071  | [full]   | 2630   | No  | NA | 0     | 2  | 2              | Not-determined  | Genome-fragment | NA    | 0     |
| 57-final-viral-combined_k141_418531   | [full]   | 2416   | No  | NA | 0     | 2  | 2              | Not-determined  | Genome-fragment | NA    | 0     |
| 57-final-viral-combined_k1            |          |        |     |    |       |    |                |                 |                 |       |       |



|                                      |          |       |     |       |    |    |                |                 |    |       |       |
|--------------------------------------|----------|-------|-----|-------|----|----|----------------|-----------------|----|-------|-------|
| 57-final-viral-combined_k141_215888  | [full]   | 2360  | No  | NA    | 0  | 0  | Not-determined | Genome-fragment | NA | 0     | 0     |
| 55-final-viral-combined_k141_255880  | [full]   | 1816  | No  | NA    | 1  | 0  | Low-quality    | Genome-fragment | NA | 3.03  | 0     |
| 57-final-viral-combined_k141_123135  | [full]   | 1816  | No  | NA    | 0  | 0  | Low-quality    | Genome-fragment | NA | 3.6   | 0     |
| 57-final-viral-combined_k141_154718  | [full]   | 1498  | No  | NA    | 0  | 1  | Not-determined | Genome-fragment | NA | 0     | 0     |
| 57-final-viral-combined_k141_24492   | [full]   | 5055  | No  | NA    | 0  | 4  | Not-determined | Genome-fragment | NA | 0     | 0     |
| 57-final-viral-combined_k141_13381   | [full]   | 2555  | No  | NA    | 0  | 0  | Not-determined | Genome-fragment | NA | 0     | 0     |
| 57-final-viral-combined_k141_103239  | [full]   | 1470  | No  | NA    | 0  | 1  | Not-determined | Genome-fragment | NA | 0     | 0     |
| 57-final-viral-combined_k141_157591  | [full]   | 1816  | No  | NA    | 0  | 0  | Low-quality    | Genome-fragment | NA | 2.95  | 0     |
| 57-final-viral-combined_k141_213861  | [full]   | 1317  | No  | NA    | 0  | 2  | Not-determined | Genome-fragment | NA | 0     | 0     |
| 57-final-viral-combined_k141_41942   | [full]   | 6653  | No  | NA    | 0  | 4  | Not-determined | Genome-fragment | NA | 0     | 0     |
| 57-final-viral-combined_k141_226090  | [full]   | 1972  | No  | NA    | 0  | 0  | Not-determined | Genome-fragment | NA | 0     | 0     |
| 57-final-viral-combined_k141_103210  | [full]   | 1712  | No  | NA    | 0  | 0  | Not-determined | Genome-fragment | NA | 0     | 0     |
| 57-final-viral-combined_k141_215915  | [full]   | 3124  | No  | NA    | 0  | 0  | Not-determined | Genome-fragment | NA | 0     | 0     |
| 517-final-viral-combined_k141_371151 | [full]   | 1816  | No  | NA    | 0  | 0  | Low-quality    | Genome-fragment | NA | 2.84  | 0     |
| 57-final-viral-combined_k141_104821  | [full]   | 2933  | No  | NA    | 0  | 0  | Not-determined | Genome-fragment | NA | 0     | 0     |
| 57-final-viral-combined_k141_174516  | [full]   | 1674  | No  | NA    | 0  | 3  | Not-determined | Genome-fragment | NA | 0     | 0     |
| 52-final-viral-combined_k141_178214  | [full]   | 1816  | No  | NA    | 0  | 0  | Low-quality    | Genome-fragment | NA | 2.4   | 0     |
| 57-final-viral-combined_k141_226112  | [full]   | 1066  | No  | NA    | 0  | 0  | Not-determined | Genome-fragment | NA | 0     | 0     |
| 59-final-viral-combined_k141_274041  | [H2gene] | 1817  | No  | NA    | 1  | 0  | Low-quality    | Genome-fragment | NA | 2.38  | 0     |
| 59-final-viral-combined_k141_4419    | [H2gene] | 1817  | No  | NA    | 1  | 0  | Low-quality    | Genome-fragment | NA | 4.71  | 0     |
| 511-final-viral-combined_k141_254445 | [full]   | 1817  | No  | NA    | 2  | 0  | Low-quality    | Genome-fragment | NA | 2.23  | 0     |
| 511-final-viral-combined_k141_275408 | [full]   | 1827  | No  | NA    | 0  | 0  | Low-quality    | Genome-fragment | NA | 2.72  | 0     |
| 511_k141_234332                      |          | 1817  | No  | NA    | 0  | 0  | Low-quality    | Genome-fragment | NA | 4.94  | 0     |
| 57-final-viral-combined_k141_52355   | [full]   | 5458  | No  | NA    | 0  | 3  | Not-determined | Genome-fragment | NA | 0     | 0     |
| 57-final-viral-combined_k141_134790  | [full]   | 2182  | No  | NA    | 0  | 1  | Not-determined | Genome-fragment | NA | 0     | 0     |
| 51-final-viral-combined_k141_65270   | [full]   | 1817  | No  | NA    | 0  | 1  | Low-quality    | Genome-fragment | NA | 1.82  | 0     |
| 57-final-viral-combined_k141_214361  | [full]   | 2006  | No  | NA    | 0  | 1  | Not-determined | Genome-fragment | NA | 0     | 0     |
| 57-final-viral-combined_k141_164890  | [full]   | 1246  | No  | NA    | 0  | 3  | Not-determined | Genome-fragment | NA | 0     | 0     |
| 57-final-viral-combined_k141_226157  | [full]   | 1674  | No  | NA    | 0  | 1  | Not-determined | Genome-fragment | NA | 0     | 0     |
| 57-final-viral-combined_k141_41950   | [full]   | 1058  | No  | NA    | 0  | 2  | Not-determined | Genome-fragment | NA | 0     | 0     |
| 57-final-viral-combined_k141_62551   | [full]   | 7084  | No  | NA    | 0  | 3  | Not-determined | Genome-fragment | NA | 0     | 0     |
| 57-final-viral-combined_k141_226165  | [full]   | 2147  | No  | NA    | 0  | 1  | Not-determined | Genome-fragment | NA | 0     | 0     |
| 57-final-viral-combined_k141_113782  | [full]   | 1540  | No  | NA    | 0  | 0  | Not-determined | Genome-fragment | NA | 0     | 0     |
| 57-final-viral-combined_k141_154810  | [full]   | 3521  | No  | NA    | 0  | 2  | Not-determined | Genome-fragment | NA | 0     | 0     |
| 57-final-viral-combined_k141_72297   | [full]   | 1902  | No  | NA    | 0  | 2  | Not-determined | Genome-fragment | NA | 0     | 0     |
| 57-final-viral-combined_k141_113795  | [full]   | 2188  | No  | NA    | 0  | 0  | Not-determined | Genome-fragment | NA | 0     | 0     |
| 53-final-viral-combined_k141_67105   | [H2gene] | 1817  | No  | NA    | 1  | 0  | Low-quality    | Genome-fragment | NA | 1.18  | 0     |
| 57-final-viral-combined_k141_185418  | [full]   | 2318  | No  | NA    | 0  | 0  | Not-determined | Genome-fragment | NA | 0     | 0     |
| 512-final-viral-combined_k141_389291 | [full]   | 1817  | No  | NA    | 0  | 2  | Low-quality    | Genome-fragment | NA | 3.91  | 0     |
| 57-final-viral-combined_k141_226195  | [full]   | 2311  | No  | NA    | 0  | 3  | Not-determined | Genome-fragment | NA | 0     | 0     |
| 56-final-viral-combined_k141_8694    | [full]   | 1817  | No  | NA    | 0  | 0  | Low-quality    | Genome-fragment | NA | 3.32  | 0     |
| 57-final-viral-combined_k141_174935  | [full]   | 60825 | Yes | 21826 | 12 | 22 | Medium-quality | Genome-fragment | NA | 56.07 | 64.12 |
| 58_k141_102655                       |          | 1817  | No  | NA    | 0  | 0  | Low-quality    | Genome-fragment | NA | 2.87  | 0     |
| 59-final-viral-combined_k141_124874  | [full]   | 1818  | No  | NA    | 4  | 0  | Low-quality    | Genome-fragment | NA | 5.54  | 0     |
| 57-final-viral-combined_k141_62597   | [full]   | 2621  | No  | NA    | 0  | 0  | Not-determined | Genome-fragment | NA | 0     | 0     |
| 55_k141_168569                       |          | 1818  | No  | NA    | 0  | 0  | Low-quality    | Genome-fragment | NA | 1.17  | 0     |
| 57-final-viral-combined_k141_52449   | [full]   | 2725  | No  | NA    | 0  | 1  | Not-determined | Genome-fragment | NA | 0     | 0     |
| 512-final-viral-combined_k141_188346 | [full]   | 1818  | No  | NA    | 0  | 0  | Low-quality    | Genome-fragment | NA | 4.22  | 0     |
| 57-final-viral-combined_k141_62921   | [full]   | 10676 | No  | NA    | 0  | 2  | Not-determined | Genome-fragment | NA | 0     | 0     |
| 57-final-viral-combined_k141_32114   | [full]   | 1898  | No  | NA    | 0  | 2  | Not-determined | Genome-fragment | NA | 0     | 0     |
| 57-final-viral-combined_k141_154852  | [full]   | 4768  | No  | NA    | 0  | 1  | Not-determined | Genome-fragment | NA | 0     | 0     |
| 57-final-viral-combined_k141_52452   | [full]   | 2032  | No  | NA    | 0  | 2  | Not-determined | Genome-fragment | NA | 0     | 0     |
| 512-final-viral-combined_k141_227334 | [full]   | 1818  | No  | NA    | 1  | 0  | Low-quality    | Genome-fragment | NA | 4.01  | 0     |
| 57-final-viral-combined_k141_92926   | [full]   | 2282  | No  | NA    | 0  | 0  | Not-determined | Genome-fragment | NA | 0     | 0     |
| 57-final-viral-combined_k141_164969  | [full]   | 8932  | No  | NA    | 0  | 1  | Not-determined | Genome-fragment | NA | 0     | 0     |
| 57-final-viral-combined_k141_126311  | [full]   | 1502  | No  | NA    | 0  | 2  | Not-determined | Genome-fragment | NA | 0     | 0     |
| 512-final-viral-combined_k141_264982 | [full]   | 1818  | No  | NA    | 0  | 1  | Low-quality    | Genome-fragment | NA | 0.89  | 0     |
| 57-final-viral-combined_k141_11544   | [full]   | 2159  | No  | NA    | 0  | 0  | Not-determined | Genome-fragment | NA | 0     | 0     |
| 57-final-viral-combined_k141_123591  | [full]   | 1221  | No  | NA    | 0  | 2  | Not-determined | Genome-fragment | NA | 0     | 0     |
| 57-final-viral-combined_k141_144112  | [full]   | 5217  | No  | NA    | 0  | 4  | Not-determined | Genome-fragment | NA | 0     | 0     |
| 52-final-viral-combined_k141_60999   | [full]   | 1818  | No  | NA    | 0  | 0  | Low-quality    | Genome-fragment | NA | 2.76  | 0     |
| 57-final-viral-combined_k141_226148  | [full]   | 2000  | No  | NA    | 0  | 1  | Not-determined | Genome-fragment | NA | 0     | 0     |
| 57-final-viral-combined_k141_117527  | [full]   | 1819  | No  | NA    | 0  | 1  | Low-quality    | Genome-fragment | NA | 0.49  | 0     |
| 57-final-viral-combined_k141_121004  | [full]   | 1819  | No  | NA    | 0  | 0  | Low-quality    | Genome-fragment | NA | 1.71  | 0     |
| 57-final-viral-combined_k141_113806  | [full]   | 1878  | No  | NA    | 0  | 0  | Not-determined | Genome-fragment | NA | 0     | 0     |
| 57-final-viral-combined_k141_82894   | [full]   | 2032  | No  | NA    | 0  | 0  | Not-determined | Genome-fragment | NA | 0     | 0     |
| 52-final-viral-combined_k141_212707  | [full]   | 1819  | No  | NA    | 0  | 2  | Low-quality    | Genome-fragment | NA | 0.5   | 0     |
| 57-final-viral-combined_k141_123957  | [full]   | 1889  | No  | NA    | 0  | 2  | Not-determined | Genome-fragment | NA | 0     | 0     |
| 59-final-viral-combined_k141_76058   | [H2gene] | 1820  | No  | NA    | 0  | 1  | Low-quality    | Genome-fragment | NA | 4.67  | 0     |
| 57-final-viral-combined_k141_134357  | [full]   | 5545  | No  | NA    | 0  | 1  | Not-determined | Genome-fragment | NA | 0     | 0     |
| 57-final-viral-combined_k141_154922  | [full]   | 1055  | No  | NA    | 0  | 0  | Not-determined | Genome-fragment | NA | 0     | 0     |
| 57-final-viral-combined_k141_82905   | [full]   | 1613  | No  | NA    | 0  | 0  | Not-determined | Genome-fragment | NA | 0     | 0     |
| 511-final-viral-combined_k141_153732 | [full]   | 1820  | No  | NA    | 0  | 0  | Low-quality    | Genome-fragment | NA | 1.38  | 0     |
| 57-final-viral-combined_k141_62667   | [full]   | 1786  | No  | NA    | 0  | 0  | Not-determined | Genome-fragment | NA | 0     | 0     |
| 511-final-viral-combined_k141_18609  | [full]   | 1820  | No  | NA    | 3  | 0  | Low-quality    | Genome-fragment | NA | 5.7   | 0     |
| 56-final-viral-combined_k141_10338   | [H2gene] | 1820  | No  | NA    | 1  | 0  | Low-quality    | Genome-fragment | NA | 4.03  | 0     |
| 517-final-viral-combined_k141_262370 | [full]   | 1820  | No  | NA    | 0  | 0  | Low-quality    | Genome-fragment | NA | 5.35  | 0     |
| 57-final-viral-combined_k141_1419    | [full]   | 1496  | No  | NA    | 0  | 2  | Not-determined | Genome-fragment | NA | 0     | 0     |
| 57-final-viral-combined_k141_103458  | [full]   | 2313  | No  | NA    | 0  | 2  | Not-determined | Genome-fragment | NA | 0     | 0     |
| 512_k141_231904                      |          | 1820  | No  | NA    | 0  | 0  | Low-quality    | Genome-fragment | NA | 2.6   | 0     |
| 57-final-viral-combined_k141_168604  | [full]   | 1821  | No  | NA    | 2  | 0  | Low-quality    | Genome-fragment | NA | 4.4   | 0     |
| 57-final-viral-combined_k141_82948   | [full]   | 1314  | No  | NA    | 0  | 0  | Not-determined | Genome-fragment | NA | 0     | 0     |
| 57-final-viral-combined_k141_185613  | [full]   | 1261  | No  | NA    | 0  | 0  | Not-determined | Genome-fragment | NA | 0     | 0     |
| 57-final-viral-combined_k141_25288   | [full]   | 2110  | No  | NA    | 0  | 1  | Not-determined | Genome-fragment | NA | 0     | 0     |
| 57-final-viral-combined_k141_123974  | [full]   | 2225  | No  | NA    | 0  | 0  | Not-determined | Genome-fragment | NA | 0     | 0     |
| 57-final-viral-combined_k141_72454   | [full]   | 4923  | No  | NA    | 0  | 0  | Not-determined | Genome-fragment | NA | 0     | 0     |
| 54-final-viral-combined_k141_140469  | [full]   | 1821  | No  | NA    | 1  | 0  | Low-quality    | Genome-fragment | NA | 3.36  | 0     |
| 58-final-viral-combined_k141_182557  | [full]   | 1821  | No  | NA    | 1  | 0  | Low-quality    | Genome-fragment | NA | 4.54  | 0     |
| 57-final-viral-combined_k141_226141  | [full]   | 6527  | No  | NA    | 0  | 2  | Not-determined | Genome-fragment | NA | 0     | 0     |
| 59_k141_118286                       |          | 1822  | No  | NA    | 2  | 0  | Low-quality    | Genome-fragment | NA | 4.37  | 0     |
| 57-final-viral-combined_k141_122692  | [full]   | 1822  | No  | NA    | 0  | 0  | Low-quality    | Genome-fragment | NA | 3.51  | 0     |
| 57-final-viral-combined_k141_154576  | [full]   | 3187  | No  | NA    | 0  | 2  | Not-determined | Genome-fragment | NA | 0     | 0     |
| 57-final-viral-combined_k141_195911  | [full]   | 2119  | No  | NA    | 0  | 2  | Not-determined | Genome-fragment | NA | 0     | 0     |
| 57-final-viral-combined_k141_114008  | [full]   | 3265  | No  | NA    | 0  | 3  | Not-determined | Genome-fragment | NA | 0     | 0     |
| 512-final-viral-combined_k141_186194 | [full]   | 1822  | No  | NA    | 1  | 0  | Low-quality    | Genome-fragment | NA | 3.03  | 0     |
| 52_k141_216595                       |          | 1822  | No  | NA    | 0  | 0  | Low-quality    | Genome-fragment | NA | 1.78  | 0     |
| 58-final-viral-combined_k141_246017  | [full]   | 1822  | No  | NA    | 1  | 0  | Low-quality    | Genome-fragment | NA | 3.71  | 0     |
| 57-final-viral-combined_k141_1499    | [full]   | 2452  | No  | NA    | 0  | 2  | Not-determined | Genome-fragment | NA | 0     | 0     |
| 57-final-viral-combined_k141_175088  | [full]   | 2531  | No  | NA    | 0  | 2  | Not-determined | Genome-fragment | NA | 0     | 0     |
| 57-final-viral-combined_k141_124059  | [full]   | 1536  | No  | NA    | 0  | 2  | Not-determined | Genome-fragment | NA | 0     | 0     |
| 59-final-viral-combined_k141_21512   | [full]   | 1823  | No  | NA    | 1  | 0  | Low-quality    | Genome-fragment | NA | 3.13  | 0     |
| 57-final-viral-combined_k141_259712  | [full]   | 3901  | No  | NA    | 0  | 0  | Not-determined | Genome-fragment | NA | 0     | 0     |
| 57-final-viral-combined_k141_185715  | [full]   | 2240  | No  | NA    | 0  | 1  | Not-determined | Genome-fragment | NA | 0     | 0     |
| 57-final-viral-combined_k141_28536   | [full]   | 2056  | No  | NA    | 0  | 0  | Not-determined | Genome-fragment | NA | 0     | 0     |
| 53_k141_47746                        |          | 1823  | No  | NA    | 0  | 2  | Low-quality    | Genome-fragment | NA | 1.2   | 0     |
| 57-final-viral-combined_k141_42177   | [full]   | 1925  | No  | NA    | 0  | 0  | Not-determined | Genome-fragment | NA | 0     | 0     |
| 57_k141_12563                        |          | 1823  | No  | NA    | 1  | 0  | Low-quality    | Genome-fragment | NA | 2.9   | 0     |
| 57-final-viral-combined_k141_62796   | [full]   | 1424  | No  | NA    | 0  | 1  | Not-determined | Genome-fragment | NA | 4.53  | 0     |
| 57_k141_198393                       |          | 1823  | No  | NA    | 3  | 0  | Low-quality    | Genome-fragment | NA | 0     | 0     |
| 57-final-viral-combined_k141_36743   | [full]   | 1823  | No  | NA    | 0  | 0  | Low-quality    | Genome-fragment | NA | 3.73  | 0     |
| 57-final-viral-combined_k141_134452  | [full]   | 64594 | No  | NA    | 10 | 8  | Medium-quality | Genome-fragment | NA | 89.97 | 0     |
| 517-final-viral-combined_k141_29143  | [H2gene] | 1823  | No  | NA    | 1  | 0  | Low-quality    | Genome-fragment | NA | 3.16  | 0     |
| 512_k141_19723                       |          | 1823  | No  | NA    | 1  | 0  | Low-quality    | Genome-fragment | NA | 1.11  | 0     |
| 52-final-viral-combined_k141_99668   | [full]   | 1823  | No  | NA    | 1  | 0  | Low-quality    | Genome-fragment | NA | 3.11  | 0     |
| 57-final-viral-combined_k141_226201  | [full]   | 1921  | No  | NA    | 0  | 0  | Not-determined | Genome-fragment | NA | 0     | 0     |
| 57-final-viral-combined_k141_32259   | [full]   | 23556 | No  | NA    | 0  | 8  | Not-determined | Genome-fragment | NA | 0     | 0     |
| 57-final-viral-combined_k141_175162  | [full]   | 1919  | No  | NA    | 0  | 1  | Not-determined | Genome-fragment | NA | 0     | 0     |
| 57-final-viral-combined_k141_165064  | [full]   | 4623  | No  | NA    | 0  | 3  | Not-determined | Genome-fragment | NA | 0     | 0     |
| 52_k141_20992                        |          | 1823  | No  | NA    | 0  | 0  | Low-quality    | Genome-fragment | NA | 2.54  | 0     |
| 57-final-viral-combined_k141_175184  | [full]   | 1458  | No  | NA    | 0  | 0  | Not-determined | Genome-fragment | NA | 0     | 0     |
| 58_k141_213437                       |          | 1823  | No  | NA    | 2  | 0  | Low-quality    | Genome-fragment | NA | 5.37  | 0     |
| 59_k141_21416                        |          |       |     |       |    |    |                |                 |    |       |       |



|                                      |          |       |    |    |    |    |                |                 |      |      |   |
|--------------------------------------|----------|-------|----|----|----|----|----------------|-----------------|------|------|---|
| 57-final-viral-combined_k141_423941  | [full]   | 1061  | No | NA | 0  | 0  | Not-determined | Genome-fragment | NA   | 0    | 0 |
| 54_k141_21183                        |          | 1825  | No | NA | 0  | 0  | Low-quality    | Genome-fragment | 0.79 | 0    | 0 |
| 58-final-viral-combined_k141_49910   | [full]   | 1825  | No | NA | 0  | 0  | Low-quality    | Genome-fragment | 5.25 | 0    | 0 |
| 58_k141_18358                        |          | 1825  | No | NA | 0  | 0  | Low-quality    | Genome-fragment | 5.53 | 0    | 0 |
| 57-final-viral-combined_k141_103790  | [full]   | 2487  | No | NA | 0  | 0  | Not-determined | Genome-fragment | NA   | 0    | 0 |
| 57-final-viral-combined_k141_185924  | [full]   | 8573  | No | NA | 0  | 0  | Not-determined | Genome-fragment | NA   | 0    | 0 |
| 59_k141_89132                        |          | 1826  | No | NA | 0  | 0  | Low-quality    | Genome-fragment | 4.12 | 0    | 0 |
| 57-final-viral-combined_k141_103808  | [full]   | 2241  | No | NA | 0  | 1  | Not-determined | Genome-fragment | NA   | 0    | 0 |
| 57-final-viral-combined_k141_124138  | [full]   | 1318  | No | NA | 0  | 1  | Not-determined | Genome-fragment | NA   | 0    | 0 |
| 57-final-viral-combined_k141_206311  | [full]   | 3019  | No | NA | 0  | 2  | Not-determined | Genome-fragment | NA   | 0    | 0 |
| 57-final-viral-combined_k141_216931  | [full]   | 51935 | No | NA | 22 | 3  | High-quality   | High-quality    | 100  | 0    | 0 |
| 57-final-viral-combined_k141_206317  | [full]   | 1263  | No | NA | 0  | 1  | Not-determined | Genome-fragment | NA   | 0    | 0 |
| 57-final-viral-combined_k141_206324  | [full]   | 1175  | No | NA | 0  | 0  | Not-determined | Genome-fragment | NA   | 0    | 0 |
| 511-final-viral-combined_k141_263794 | [full]   | 1826  | No | NA | 0  | 2  | Low-quality    | Genome-fragment | 1.13 | 0    | 0 |
| 511-final-viral-combined_k141_198269 | [full]   | 1826  | No | NA | 3  | 0  | Low-quality    | Genome-fragment | 4.12 | 0    | 0 |
| 57-final-viral-combined_k141_144588  | [full]   | 3007  | No | NA | 0  | 3  | Not-determined | Genome-fragment | NA   | 0    | 0 |
| 51-final-viral-combined_k141_260730  | [full]   | 1826  | No | NA | 0  | 1  | Low-quality    | Genome-fragment | 1.5  | 0    | 0 |
| 512-final-viral-combined_k141_345071 | [full]   | 1826  | No | NA | 0  | 1  | Low-quality    | Genome-fragment | 0.43 | 0    | 0 |
| 57-final-viral-combined_k141_235691  | [full]   | 1251  | No | NA | 0  | 2  | Not-determined | Genome-fragment | NA   | 0    | 0 |
| 57-final-viral-combined_k141_226704  | [full]   | 1106  | No | NA | 0  | 2  | Not-determined | Genome-fragment | NA   | 0    | 0 |
| 57-final-viral-combined_k141_114335  | [full]   | 3189  | No | NA | 0  | 3  | Not-determined | Genome-fragment | NA   | 0    | 0 |
| 57-final-viral-combined_k141_114338  | [full]   | 3486  | No | NA | 0  | 3  | Not-determined | Genome-fragment | NA   | 0    | 0 |
| 52-final-viral-combined_k141_7444    | [full]   | 1826  | No | NA | 1  | 0  | Low-quality    | Genome-fragment | 2.82 | 0    | 0 |
| 54_k141_22621                        |          | 1826  | No | NA | 1  | 0  | Low-quality    | Genome-fragment | 2.96 | 0    | 0 |
| 57-final-viral-combined_k141_83187   | [full]   | 2101  | No | NA | 0  | 2  | Not-determined | Genome-fragment | NA   | 0    | 0 |
| 57-final-viral-combined_k141_23077   | [full]   | 1662  | No | NA | 0  | 0  | Not-determined | Genome-fragment | NA   | 0    | 0 |
| 57-final-viral-combined_k141_114379  | [full]   | 4770  | No | NA | 0  | 0  | Not-determined | Genome-fragment | NA   | 0    | 0 |
| 56-final-viral-combined_k141_24094   | [full]   | 1826  | No | NA | 0  | 1  | Low-quality    | Genome-fragment | 1.69 | 0    | 0 |
| 57-final-viral-combined_k141_114395  | [full]   | 1193  | No | NA | 0  | 0  | Not-determined | Genome-fragment | NA   | 0    | 0 |
| 57-final-viral-combined_k141_21762   | [full]   | 1997  | No | NA | 0  | 2  | Not-determined | Genome-fragment | NA   | 0    | 0 |
| 57-final-viral-combined_k141_114399  | [full]   | 1618  | No | NA | 0  | 1  | Not-determined | Genome-fragment | NA   | 0    | 0 |
| 57-final-viral-combined_k141_232329  | [full]   | 2992  | No | NA | 0  | 2  | Not-determined | Genome-fragment | NA   | 1.06 | 0 |
| 56-final-viral-combined_k141_56685   | [full]   | 1826  | No | NA | 0  | 2  | Low-quality    | Genome-fragment | 5.77 | 0    | 0 |
| 511-final-viral-combined_k141_286154 | [full]   | 1827  | No | NA | 0  | 0  | Low-quality    | Genome-fragment | 2.78 | 0    | 0 |
| 57-final-viral-combined_k141_114429  | [full]   | 1195  | No | NA | 0  | 3  | Not-determined | Genome-fragment | NA   | 0    | 0 |
| 57-final-viral-combined_k141_1834    | [full]   | 3803  | No | NA | 0  | 2  | Not-determined | Genome-fragment | NA   | 0    | 0 |
| 55-final-viral-combined_k141_33375   | [full]   | 1827  | No | NA | 0  | 0  | Low-quality    | Genome-fragment | 1    | 0    | 0 |
| 57-final-viral-combined_k141_124462  | [full]   | 1661  | No | NA | 0  | 2  | Not-determined | Genome-fragment | NA   | 0    | 0 |
| 57-final-viral-combined_k141_155198  | [full]   | 2761  | No | NA | 0  | 2  | Not-determined | Genome-fragment | NA   | 3.16 | 0 |
| 512-final-viral-combined_k141_347627 | [full]   | 1827  | No | NA | 0  | 1  | Low-quality    | Genome-fragment | 4.98 | 0    | 0 |
| 57-final-viral-combined_k141_27592   | [full]   | 1035  | No | NA | 0  | 0  | Not-determined | Genome-fragment | NA   | 0    | 0 |
| 57-final-viral-combined_k141_155208  | [full]   | 5618  | No | NA | 0  | 2  | Not-determined | Genome-fragment | NA   | 0    | 0 |
| 57-final-viral-combined_k141_216272  | [full]   | 1245  | No | NA | 0  | 0  | Not-determined | Genome-fragment | NA   | 0    | 0 |
| 52_k141_124146                       |          | 1827  | No | NA | 0  | 1  | Low-quality    | Genome-fragment | 4.44 | 0    | 0 |
| 57-final-viral-combined_k141_104010  | [full]   | 6487  | No | NA | 0  | 0  | Not-determined | Genome-fragment | NA   | 0    | 0 |
| 57-final-viral-combined_k141_53148   | [full]   | 4898  | No | NA | 0  | 0  | Not-determined | Genome-fragment | NA   | 0    | 0 |
| 57-final-viral-combined_k141_155247  | [full]   | 1073  | No | NA | 0  | 1  | Not-determined | Genome-fragment | NA   | 0    | 0 |
| 54-final-viral-combined_k141_121132  | [full]   | 1827  | No | NA | 2  | 0  | Low-quality    | Genome-fragment | 5.37 | 0    | 0 |
| 57-final-viral-combined_k141_206514  | [full]   | 3469  | No | NA | 0  | 4  | Not-determined | Genome-fragment | NA   | 0    | 0 |
| 57-final-viral-combined_k141_124567  | [full]   | 3070  | No | NA | 0  | 1  | Not-determined | Genome-fragment | NA   | 0    | 0 |
| 57-final-viral-combined_k141_27234   | [full]   | 1030  | No | NA | 0  | 0  | Not-determined | Genome-fragment | NA   | 0    | 0 |
| 57-final-viral-combined_k141_27627   | [full]   | 2062  | No | NA | 0  | 0  | Not-determined | Genome-fragment | NA   | 0    | 0 |
| 56-final-viral-combined_k141_13865   | [full]   | 1827  | No | NA | 0  | 0  | Low-quality    | Genome-fragment | 3.86 | 0    | 0 |
| 57-final-viral-combined_k141_155304  | [full]   | 1699  | No | NA | 0  | 2  | Not-determined | Genome-fragment | NA   | 0    | 0 |
| 58-final-viral-combined_k141_153405  | [full]   | 1827  | No | NA | 0  | 0  | Low-quality    | Genome-fragment | 1.53 | 0    | 0 |
| 57-final-viral-combined_k141_104078  | [full]   | 2119  | No | NA | 0  | 0  | Not-determined | Genome-fragment | NA   | 0    | 0 |
| 58-final-viral-combined_k141_19731   | [full]   | 1827  | No | NA | 1  | 0  | Low-quality    | Genome-fragment | 3.62 | 0    | 0 |
| 58-final-viral-combined_k141_6751    | [full]   | 1828  | No | NA | 1  | 0  | Low-quality    | Genome-fragment | 0.96 | 0    | 0 |
| 51-final-viral-combined_k141_35974   | [full]   | 1828  | No | NA | 0  | 1  | Low-quality    | Genome-fragment | 1.06 | 0    | 0 |
| 55_k141_98644                        |          | 1828  | No | NA | 0  | 0  | Low-quality    | Genome-fragment | 3.05 | 0    | 0 |
| 57-final-viral-combined_k141_146551  | [full]   | 2642  | No | NA | 0  | 1  | Not-determined | Genome-fragment | NA   | 2.89 | 0 |
| 512-final-viral-combined_k141_267514 | [full]   | 1828  | No | NA | 0  | 0  | Low-quality    | Genome-fragment | NA   | 0    | 0 |
| 57-final-viral-combined_k141_134692  | [full]   | 1186  | No | NA | 0  | 0  | Not-determined | Genome-fragment | NA   | 0    | 0 |
| 512_k141_31801                       |          | 1828  | No | NA | 0  | 1  | Low-quality    | Genome-fragment | 1.01 | 0    | 0 |
| 57-final-viral-combined_k141_63122   | [full]   | 1008  | No | NA | 0  | 0  | Not-determined | Genome-fragment | NA   | 0    | 0 |
| 52-final-viral-combined_k141_187140  | [full]   | 1828  | No | NA | 0  | 3  | Low-quality    | Genome-fragment | 3.13 | 0    | 0 |
| 52_k141_110310                       |          | 1828  | No | NA | 2  | 0  | Low-quality    | Genome-fragment | 2.95 | 0    | 0 |
| 54-final-viral-combined_k141_126140  | [full]   | 1828  | No | NA | 2  | 0  | Low-quality    | Genome-fragment | 2.34 | 0    | 0 |
| 57-final-viral-combined_k141_72664   | [full]   | 2302  | No | NA | 1  | 0  | Not-determined | Genome-fragment | NA   | 0    | 0 |
| 54_k141_47107                        |          | 1828  | No | NA | 0  | 0  | Low-quality    | Genome-fragment | 1.83 | 0    | 0 |
| 57-final-viral-combined_k141_1925    | [full]   | 1878  | No | NA | 0  | 1  | Not-determined | Genome-fragment | NA   | 3.26 | 0 |
| 58-final-viral-combined_k141_269106  | [full]   | 1828  | No | NA | 0  | 1  | Low-quality    | Genome-fragment | NA   | 0    | 0 |
| 57-final-viral-combined_k141_63124   | [full]   | 6484  | No | NA | 0  | 2  | Not-determined | Genome-fragment | NA   | 0    | 0 |
| 511-final-viral-combined_k141_237851 | [full]   | 1829  | No | NA | 0  | 1  | Low-quality    | Genome-fragment | 2.77 | 0    | 0 |
| 57-final-viral-combined_k141_155360  | [full]   | 2751  | No | NA | 0  | 0  | Not-determined | Genome-fragment | NA   | 0    | 0 |
| 57-final-viral-combined_k141_1944    | [full]   | 1059  | No | NA | 0  | 0  | Not-determined | Genome-fragment | NA   | 0    | 0 |
| 55-final-viral-combined_k141_177437  | [full]   | 1829  | No | NA | 2  | 0  | Low-quality    | Genome-fragment | 3.21 | 0    | 0 |
| 57-final-viral-combined_k141_144574  | [full]   | 1539  | No | NA | 0  | 0  | Not-determined | Genome-fragment | NA   | 0    | 0 |
| 57-final-viral-combined_k141_72702   | [full]   | 1829  | No | NA | 0  | 0  | Low-quality    | Genome-fragment | 5.25 | 0    | 0 |
| 512-final-viral-combined_k141_164148 | [full]   | 1829  | No | NA | 1  | 0  | Low-quality    | Genome-fragment | 3.39 | 0    | 0 |
| 56-final-viral-combined_k141_109432  | [full]   | 1829  | No | NA | 0  | 0  | Low-quality    | Genome-fragment | 2.22 | 0    | 0 |
| 511-final-viral-combined_k141_11938  | [full]   | 1830  | No | NA | 0  | 0  | Low-quality    | Genome-fragment | 3.16 | 0    | 0 |
| 51-final-viral-combined_k141_44628   | [full]   | 1830  | No | NA | 0  | 1  | Low-quality    | Genome-fragment | 1.52 | 0    | 0 |
| 51-final-viral-combined_k141_78426   | [full]   | 1830  | No | NA | 1  | 0  | Low-quality    | Genome-fragment | 3.75 | 0    | 0 |
| 53-final-viral-combined_k141_17584   | [full]   | 1830  | No | NA | 0  | 0  | Low-quality    | Genome-fragment | 3.32 | 0    | 0 |
| 57-final-viral-combined_k141_216438  | [full]   | 5657  | No | NA | 0  | 2  | Not-determined | Genome-fragment | NA   | 0    | 0 |
| 55-final-viral-combined_k141_66319   | [full]   | 1830  | No | NA | 2  | 0  | Low-quality    | Genome-fragment | 5.36 | 0    | 0 |
| 57-final-viral-combined_k141_144591  | [full]   | 3044  | No | NA | 0  | 3  | Not-determined | Genome-fragment | NA   | 4.17 | 0 |
| 517-final-viral-combined_k141_207185 | [H2gene] | 1830  | No | NA | 0  | 0  | Low-quality    | Genome-fragment | NA   | 0    | 0 |
| 57-final-viral-combined_k141_53209   | [full]   | 4482  | No | NA | 0  | 3  | Not-determined | Genome-fragment | NA   | 0    | 0 |
| 57-final-viral-combined_k141_83366   | [full]   | 1232  | No | NA | 0  | 1  | Not-determined | Genome-fragment | NA   | 0    | 0 |
| 57-final-viral-combined_k141_105438  | [full]   | 2523  | No | NA | 0  | 3  | Not-determined | Genome-fragment | NA   | 0    | 0 |
| 57-final-viral-combined_k141_227001  | [full]   | 2506  | No | NA | 0  | 2  | Not-determined | Genome-fragment | NA   | 0    | 0 |
| 57-final-viral-combined_k141_206657  | [full]   | 5769  | No | NA | 0  | 0  | Not-determined | Genome-fragment | NA   | 0    | 0 |
| 57-final-viral-combined_k141_114601  | [full]   | 1534  | No | NA | 0  | 1  | Not-determined | Genome-fragment | NA   | 0    | 0 |
| 57-final-viral-combined_k141_12084   | [full]   | 2454  | No | NA | 0  | 1  | Not-determined | Genome-fragment | NA   | 0    | 0 |
| 57-final-viral-combined_k141_206670  | [full]   | 2232  | No | NA | 0  | 1  | Not-determined | Genome-fragment | NA   | 0    | 0 |
| 57-final-viral-combined_k141_17254   | [full]   | 2028  | No | NA | 0  | 1  | Not-determined | Genome-fragment | NA   | 0    | 0 |
| 57-final-viral-combined_k141_196158  | [full]   | 3215  | No | NA | 0  | 1  | Not-determined | Genome-fragment | NA   | 0    | 0 |
| 512-final-viral-combined_k141_148930 | [full]   | 1830  | No | NA | 0  | 0  | Low-quality    | Genome-fragment | 4.09 | 0    | 0 |
| 57-final-viral-combined_k141_22029   | [full]   | 6614  | No | NA | 0  | 3  | Not-determined | Genome-fragment | NA   | 0    | 0 |
| 57-final-viral-combined_k141_144614  | [full]   | 1402  | No | NA | 0  | 1  | Not-determined | Genome-fragment | NA   | 0    | 0 |
| 512-final-viral-combined_k141_79599  | [full]   | 1830  | No | NA | 1  | 0  | Low-quality    | Genome-fragment | 1.12 | 0    | 0 |
| 57-final-viral-combined_k141_104214  | [full]   | 1414  | No | NA | 0  | 2  | Not-determined | Genome-fragment | NA   | 0.73 | 0 |
| 58-final-viral-combined_k141_235826  | [full]   | 1830  | No | NA | 0  | 2  | Low-quality    | Genome-fragment | NA   | 0    | 0 |
| 57-final-viral-combined_k141_2050    | [full]   | 12084 | No | NA | 0  | 7  | Not-determined | Genome-fragment | NA   | 0    | 0 |
| 51-final-viral-combined_k141_193101  | [full]   | 1831  | No | NA | 0  | 1  | Low-quality    | Genome-fragment | 2.69 | 0    | 0 |
| 57-final-viral-combined_k141_22049   | [full]   | 16296 | No | NA | 0  | 10 | Not-determined | Genome-fragment | NA   | 0    | 0 |
| 57-final-viral-combined_k141_18625   | [full]   | 34162 | No | NA | 0  | 0  | Not-determined | Genome-fragment | NA   | 0    | 0 |
| 57-final-viral-combined_k141_2073    | [full]   | 2952  | No | NA | 0  | 2  | Not-determined | Genome-fragment | NA   | 0    | 0 |
| 57-final-viral-combined_k141_63284   | [full]   | 1598  | No | NA | 0  | 1  | Not-determined | Genome-fragment | NA   | 0    | 0 |
| 57-final-viral-combined_k141_45599   | [full]   | 1831  | No | NA | 0  | 1  | Low-quality    | Genome-fragment | 6.63 | 0    | 0 |
| 57-final-viral-combined_k141_114637  | [full]   | 2091  | No | NA | 0  | 1  | Not-determined | Genome-fragment | NA   | 0    | 0 |
| 54-final-viral-combined_k141_13988   | [H2gene] | 1831  | No | NA | 1  | 0  | Low-quality    | Genome-fragment | 4.77 | 0    | 0 |
| 57-final-viral-combined_k141_155184  | [full]   | 7561  | No | NA | 0  | 2  | Not-determined | Genome-fragment | NA   | 4.19 | 0 |
| 57-final-viral-combined_k141_186271  | [full]   | 2932  | No | NA | 0  | 1  | Not-determined | Genome-fragment | NA   | 0    | 0 |
| 57-final-viral-combined_k141_155501  | [full]   | 3809  | No | NA | 0  | 4  | Not-determined | Genome-fragment | NA   | 0    | 0 |
| 57-final-viral-combined_k141_62977   | [full]   | 4855  | No | NA | 0  | 1  | Not-determined | Genome-fragment | NA   | 0    | 0 |
| 57-final-viral-combined_k141_196453  | [full]   | 1330  | No | NA | 0  | 0  | Not-determined | Genome-fragment | NA   | 0    | 0 |
| 54_k141_7357                         |          | 1831  | No | NA | 0  | 1  | Low-quality    | Genome-fragment | 3.05 | 0    | 0 |
| 54_k141_144800                       |          | 1831  | No | NA | 0  | 0  | Low-quality    | Genome-fragment | 3.62 | 0    | 0 |
| 57-final-viral-combined_k141_63320   | [full]   | 1     |    |    |    |    |                |                 |      |      |   |



|                                      |          |        |     |       |    |    |                |                 |       |       |
|--------------------------------------|----------|--------|-----|-------|----|----|----------------|-----------------|-------|-------|
| 517-final-viral-combined_k141_68196  | [full]   | 1837   | No  | NA    | 1  | 0  | Low-quality    | Genome-fragment | 3.71  | 0     |
| 52-final-viral-combined_k141_71512   | [full]   | 1837   | No  | NA    | 0  | 0  | Low-quality    | Genome-fragment | 2.13  | 0     |
| 57-final-viral-combined_k141_144928  | [full]   | 1147   | No  | NA    | 0  | 0  | Not-determined | Genome-fragment | NA    | 0     |
| 57-final-viral-combined_k141_104480  | [full]   | 1812   | No  | NA    | 0  | 2  | Not-determined | Genome-fragment | NA    | 0     |
| 57-final-viral-combined_k141_13047   | [full]   | 1300   | No  | NA    | 0  | 3  | Not-determined | Genome-fragment | NA    | 0     |
| 57-final-viral-combined_k141_63558   | [full]   | 1716   | No  | NA    | 0  | 0  | Not-determined | Genome-fragment | NA    | 0     |
| 57-final-viral-combined_k141_144940  | [full]   | 3197   | No  | NA    | 0  | 2  | Not-determined | Genome-fragment | NA    | 0     |
| 57-final-viral-combined_k141_73048   | [full]   | 2293   | No  | NA    | 0  | 2  | Not-determined | Genome-fragment | NA    | 0     |
| 57-final-viral-combined_k141_21614   | [full]   | 12410  | No  | NA    | 0  | 2  | Not-determined | Genome-fragment | NA    | 0     |
| 57-final-viral-combined_k141_114827  | [full]   | 115177 | No  | NA    | 0  | 24 | Not-determined | Genome-fragment | NA    | 0     |
| 57-final-viral-combined_k141_63582   | [full]   | 1724   | No  | NA    | 0  | 1  | Not-determined | Genome-fragment | NA    | 0     |
| 57-final-viral-combined_k141_114820  | [full]   | 1789   | No  | NA    | 0  | 2  | Not-determined | Genome-fragment | NA    | 0     |
| 58-final-viral-combined_k141_199279  | [full]   | 1837   | No  | NA    | 0  | 0  | Low-quality    | Genome-fragment | 1.73  | 0     |
| 53-final-viral-combined_k141_117118  | [full]   | 1838   | No  | NA    | 1  | 0  | Low-quality    | Genome-fragment | 4.7   | 0     |
| 55_k141_75586                        |          | 1838   | No  | NA    | 0  | 0  | Low-quality    | Genome-fragment | 3.63  | 0     |
| 57-final-viral-combined_k141_124910  | [full]   | 11658  | No  | NA    | 0  | 0  | Not-determined | Genome-fragment | NA    | 0     |
| 57-final-viral-combined_k141_54943   | [full]   | 1838   | No  | NA    | 0  | 0  | Low-quality    | Genome-fragment | 4.1   | 0     |
| 57-final-viral-combined_k141_53544   | [full]   | 4120   | No  | NA    | 0  | 0  | Not-determined | Genome-fragment | NA    | 0     |
| 57-final-viral-combined_k141_160841  | [full]   | 1578   | No  | NA    | 0  | 0  | Not-determined | Genome-fragment | NA    | 0     |
| 57-final-viral-combined_k141_237441  | [full]   | 10565  | No  | NA    | 0  | 5  | Not-determined | Genome-fragment | NA    | 0     |
| 57-final-viral-combined_k141_186673  | [full]   | 2165   | No  | NA    | 0  | 1  | Not-determined | Genome-fragment | NA    | 0     |
| 57-final-viral-combined_k141_83782   | [full]   | 2122   | No  | NA    | 0  | 1  | Not-determined | Genome-fragment | NA    | 0     |
| 57-final-viral-combined_k141_210071  | [full]   | 1838   | No  | NA    | 0  | 0  | Low-quality    | Genome-fragment | 2.84  | 0     |
| 57-final-viral-combined_k141_43161   | [full]   | 1816   | No  | NA    | 0  | 1  | Not-determined | Genome-fragment | NA    | 0     |
| 57_k141_29234                        |          | 1838   | No  | NA    | 1  | 0  | Low-quality    | Genome-fragment | 4.01  | 0     |
| 58-final-viral-combined_k141_183673  | [full]   | 1838   | No  | NA    | 0  | 0  | Low-quality    | Genome-fragment | 3.91  | 0     |
| 511-final-viral-combined_k141_290523 | [full]   | 1839   | No  | NA    | 0  | 2  | Low-quality    | Genome-fragment | 2.5   | 0     |
| 57-final-viral-combined_k141_12484   | [full]   | 4183   | No  | NA    | 0  | 1  | Not-determined | Genome-fragment | NA    | 0     |
| 57-final-viral-combined_k141_83809   | [full]   | 3842   | No  | NA    | 0  | 0  | Not-determined | Genome-fragment | NA    | 0     |
| 511-final-viral-combined_k141_73125  | [full]   | 1839   | No  | NA    | 0  | 0  | Low-quality    | Genome-fragment | 4.4   | 0     |
| 57-final-viral-combined_k141_186702  | [full]   | 2409   | No  | NA    | 0  | 1  | Not-determined | Genome-fragment | NA    | 0     |
| 57-final-viral-combined_k141_155840  | [full]   | 1784   | No  | NA    | 0  | 2  | Not-determined | Genome-fragment | NA    | 0     |
| 57-final-viral-combined_k141_135049  | [full]   | 7902   | No  | NA    | 0  | 6  | Not-determined | Genome-fragment | NA    | 0     |
| 53-final-viral-combined_k141_12051   | [full]   | 1839   | No  | NA    | 0  | 0  | Low-quality    | Genome-fragment | 1.25  | 0     |
| 57-final-viral-combined_k141_63751   | [full]   | 2431   | No  | NA    | 0  | 1  | Not-determined | Genome-fragment | NA    | 0     |
| 55-final-viral-combined_k141_73740   | [full]   | 1839   | No  | NA    | 0  | 0  | Low-quality    | Genome-fragment | 3.85  | 0     |
| 517-final-viral-combined_k141_555169 | [full]   | 1839   | No  | NA    | 0  | 1  | Low-quality    | Genome-fragment | 3.39  | 0     |
| 517_k141_195720                      |          | 1839   | No  | NA    | 0  | 1  | Low-quality    | Genome-fragment | 0.99  | 0     |
| 52-final-viral-combined_k141_165960  | [full]   | 1839   | No  | NA    | 0  | 0  | Low-quality    | Genome-fragment | 4.34  | 0     |
| 57-final-viral-combined_k141_237534  | [full]   | 1610   | No  | NA    | 0  | 2  | Not-determined | Genome-fragment | NA    | 0     |
| 57-final-viral-combined_k141_63747   | [full]   | 5474   | No  | NA    | 0  | 1  | Not-determined | Genome-fragment | NA    | 0     |
| 51-final-viral-combined_k141_234150  | [full]   | 1840   | No  | NA    | 0  | 0  | Low-quality    | Genome-fragment | 2.26  | 0     |
| 51-final-viral-combined_k141_141867  | [full]   | 1840   | No  | NA    | 1  | 0  | Low-quality    | Genome-fragment | 1.12  | 0     |
| 51-final-viral-combined_k141_142832  | [full]   | 1840   | No  | NA    | 0  | 1  | Low-quality    | Genome-fragment | 1.92  | 0     |
| 57-final-viral-combined_k141_83879   | [full]   | 4994   | No  | NA    | 0  | 3  | Not-determined | Genome-fragment | NA    | 0     |
| 51-final-viral-combined_k141_175691  | [full]   | 1840   | No  | NA    | 0  | 0  | Low-quality    | Genome-fragment | 4.52  | 0     |
| 53-final-viral-combined_k141_30820   | [full]   | 1840   | No  | NA    | 0  | 0  | Low-quality    | Genome-fragment | 1.52  | 0     |
| 57-final-viral-combined_k141_2520    | [full]   | 2335   | No  | NA    | 0  | 1  | Not-determined | Genome-fragment | NA    | 0     |
| 57-final-viral-combined_k141_186761  | [full]   | 3316   | No  | NA    | 0  | 2  | Not-determined | Genome-fragment | NA    | 0     |
| 57-final-viral-combined_k141_22411   | [full]   | 6763   | No  | NA    | 0  | 5  | Not-determined | Genome-fragment | NA    | 0     |
| 57-final-viral-combined_k141_165927  | [full]   | 1237   | No  | NA    | 0  | 2  | Not-determined | Genome-fragment | NA    | 0     |
| 57-final-viral-combined_k141_165951  | [full]   | 7650   | No  | NA    | 0  | 1  | Not-determined | Genome-fragment | NA    | 0     |
| 517-final-viral-combined_k141_101007 | [full]   | 1840   | No  | NA    | 0  | 2  | Low-quality    | Genome-fragment | 2.88  | 0     |
| 57-final-viral-combined_k141_135121  | [full]   | 2679   | No  | NA    | 0  | 1  | Not-determined | Genome-fragment | NA    | 0     |
| 512_k141_354784                      |          | 1840   | No  | NA    | 0  | 0  | Low-quality    | Genome-fragment | 3.72  | 0     |
| 512_k141_140624                      |          | 1840   | No  | NA    | 0  | 0  | Low-quality    | Genome-fragment | 5.67  | 0     |
| 57-final-viral-combined_k141_2596    | [full]   | 2707   | No  | NA    | 0  | 2  | Not-determined | Genome-fragment | NA    | 0     |
| 57-final-viral-combined_k141_165939  | [full]   | 5582   | No  | NA    | 0  | 3  | Not-determined | Genome-fragment | NA    | 0     |
| 57-final-viral-combined_k141_165940  | [full]   | 9600   | No  | NA    | 0  | 2  | Not-determined | Genome-fragment | NA    | 0     |
| 57-final-viral-combined_k141_145080  | [full]   | 2292   | No  | NA    | 0  | 2  | Not-determined | Genome-fragment | NA    | 0     |
| 52-final-viral-combined_k141_52541   | [full]   | 1840   | No  | NA    | 0  | 0  | Low-quality    | Genome-fragment | 3.5   | 0     |
| 57-final-viral-combined_k141_114976  | [full]   | 3969   | No  | NA    | 0  | 0  | Not-determined | Genome-fragment | NA    | 0     |
| 57-final-viral-combined_k141_104532  | [full]   | 1520   | No  | NA    | 0  | 0  | Not-determined | Genome-fragment | NA    | 0     |
| 511-final-viral-combined_k141_268335 | [full]   | 1841   | No  | NA    | 0  | 0  | Low-quality    | Genome-fragment | 4.43  | 0     |
| 57-final-viral-combined_k141_63867   | [full]   | 17572  | No  | NA    | 13 | 0  | Not-determined | Genome-fragment | NA    | 0     |
| 511-final-viral-combined_k141_119824 | [full]   | 1841   | No  | NA    | 0  | 1  | Low-quality    | Genome-fragment | 2.32  | 0     |
| 51-final-viral-combined_k141_135380  | [full]   | 1841   | No  | NA    | 1  | 0  | Low-quality    | Genome-fragment | 6.1   | 0     |
| 57-final-viral-combined_k141_104579  | [full]   | 4673   | No  | NA    | 0  | 2  | Not-determined | Genome-fragment | NA    | 0     |
| 51-final-viral-combined_k141_250074  | [H2gene] | 1841   | No  | NA    | 0  | 0  | Low-quality    | Genome-fragment | 4.46  | 0     |
| 57-final-viral-combined_k141_104582  | [full]   | 2226   | No  | NA    | 0  | 2  | Not-determined | Genome-fragment | NA    | 0     |
| 57-final-viral-combined_k141_104584  | [full]   | 2507   | No  | NA    | 0  | 2  | Not-determined | Genome-fragment | NA    | 0     |
| 57-final-viral-combined_k141_63332   | [full]   | 1841   | No  | NA    | 0  | 0  | Low-quality    | Genome-fragment | 3.45  | 0     |
| 517-final-viral-combined_k141_100445 | [full]   | 1841   | No  | NA    | 2  | 0  | Low-quality    | Genome-fragment | 4.47  | 0     |
| 57-final-viral-combined_k141_135154  | [full]   | 50087  | Yes | 29396 | 4  | 9  | Medium-quality | Genome-fragment | 64.79 | 41.31 |
| 517-final-viral-combined_k141_25997  | [H2gene] | 1841   | No  | NA    | 1  | 0  | Low-quality    | Genome-fragment | 1.18  | 0     |
| 52-final-viral-combined_k141_104867  | [H2gene] | 1841   | No  | NA    | 1  | 0  | Low-quality    | Genome-fragment | 3.91  | 0     |
| 57-final-viral-combined_k141_166036  | [full]   | 2544   | No  | NA    | 0  | 0  | Not-determined | Genome-fragment | NA    | 0     |
| 54-final-viral-combined_k141_163409  | [full]   | 1841   | No  | NA    | 1  | 0  | Low-quality    | Genome-fragment | 1.83  | 0     |
| 511-final-viral-combined_k141_63561  | [full]   | 1842   | No  | NA    | 0  | 0  | Low-quality    | Genome-fragment | 5.26  | 0     |
| 57-final-viral-combined_k141_73312   | [full]   | 1113   | No  | NA    | 0  | 2  | Not-determined | Genome-fragment | NA    | 0     |
| 57-final-viral-combined_k141_83905   | [full]   | 1504   | No  | NA    | 0  | 0  | Not-determined | Genome-fragment | NA    | 0     |
| 51-final-viral-combined_k141_112127  | [full]   | 1842   | No  | NA    | 0  | 0  | Low-quality    | Genome-fragment | 2.13  | 0     |
| 57-final-viral-combined_k141_186970  | [full]   | 1459   | No  | NA    | 0  | 0  | Not-determined | Genome-fragment | NA    | 0     |
| 57-final-viral-combined_k141_115103  | [full]   | 3745   | No  | NA    | 0  | 2  | Not-determined | Genome-fragment | NA    | 0     |
| 51_k141_33032                        |          | 1842   | No  | NA    | 3  | 0  | Low-quality    | Genome-fragment | 3.3   | 0     |
| 57-final-viral-combined_k141_104666  | [full]   | 1076   | No  | NA    | 0  | 0  | Not-determined | Genome-fragment | NA    | 0     |
| 57-final-viral-combined_k141_104673  | [full]   | 1811   | No  | NA    | 0  | 2  | Not-determined | Genome-fragment | NA    | 0     |
| 57-final-viral-combined_k141_197124  | [full]   | 1576   | No  | NA    | 0  | 1  | Not-determined | Genome-fragment | NA    | 0     |
| 57-final-viral-combined_k141_115119  | [full]   | 1845   | No  | NA    | 0  | 0  | Not-determined | Genome-fragment | NA    | 0     |
| 57-final-viral-combined_k141_175961  | [full]   | 2192   | No  | NA    | 0  | 4  | Not-determined | Genome-fragment | NA    | 0     |
| 57-final-viral-combined_k141_33394   | [full]   | 1842   | No  | NA    | 2  | 0  | Low-quality    | Genome-fragment | 4.64  | 0     |
| 57-final-viral-combined_k141_237671  | [full]   | 1071   | No  | NA    | 0  | 0  | Not-determined | Genome-fragment | NA    | 0     |
| 58-final-viral-combined_k141_92983   | [full]   | 1842   | No  | NA    | 0  | 0  | Low-quality    | Genome-fragment | 2.97  | 0     |
| 57-final-viral-combined_k141_22493   | [full]   | 4320   | No  | NA    | 0  | 4  | Not-determined | Genome-fragment | NA    | 0     |
| 512-final-viral-combined_k141_242323 | [full]   | 1843   | No  | NA    | 0  | 0  | Low-quality    | Genome-fragment | 3.91  | 0     |
| 512-final-viral-combined_k141_63546  | [full]   | 1843   | No  | NA    | 1  | 0  | Low-quality    | Genome-fragment | 3.12  | 0     |
| 57-final-viral-combined_k141_33381   | [full]   | 2187   | No  | NA    | 0  | 0  | Not-determined | Genome-fragment | NA    | 0     |
| 57-final-viral-combined_k141_33387   | [full]   | 1277   | No  | NA    | 0  | 1  | Not-determined | Genome-fragment | NA    | 0     |
| 57-final-viral-combined_k141_125141  | [full]   | 1089   | No  | NA    | 0  | 0  | Not-determined | Genome-fragment | NA    | 0     |
| 52-final-viral-combined_k141_6924    | [full]   | 1843   | No  | NA    | 0  | 2  | Low-quality    | Genome-fragment | 1.3   | 0     |
| 57-final-viral-combined_k141_33404   | [full]   | 2535   | No  | NA    | 0  | 1  | Not-determined | Genome-fragment | NA    | 0     |
| 57-final-viral-combined_k141_166135  | [full]   | 3542   | No  | NA    | 0  | 0  | Not-determined | Genome-fragment | NA    | 0     |
| 54_k141_158682                       |          | 1843   | No  | NA    | 0  | 1  | Low-quality    | Genome-fragment | 1.11  | 0     |
| 58-final-viral-combined_k141_102632  | [H2gene] | 1843   | No  | NA    | 1  | 0  | Low-quality    | Genome-fragment | 0.15  | 0     |
| 57-final-viral-combined_k141_237318  | [full]   | 3381   | No  | NA    | 0  | 0  | Not-determined | Genome-fragment | NA    | 0     |
| 51-final-viral-combined_k141_390580  | [full]   | 1844   | No  | NA    | 0  | 2  | Low-quality    | Genome-fragment | 3.37  | 0     |
| 57-final-viral-combined_k141_225569  | [full]   | 1844   | No  | NA    | 0  | 1  | Low-quality    | Genome-fragment | 1.92  | 0     |
| 57-final-viral-combined_k141_227683  | [full]   | 2383   | No  | NA    | 0  | 0  | Not-determined | Genome-fragment | NA    | 0     |
| 57-final-viral-combined_k141_53774   | [full]   | 2276   | No  | NA    | 0  | 0  | Not-determined | Genome-fragment | NA    | 0     |
| 512-final-viral-combined_k141_253665 | [full]   | 1844   | No  | NA    | 1  | 0  | Low-quality    | Genome-fragment | 3.45  | 0     |
| 512_k141_362240                      |          | 1844   | No  | NA    | 0  | 0  | Low-quality    | Genome-fragment | 3.91  | 0     |
| 57-final-viral-combined_k141_156234  | [full]   | 1511   | No  | NA    | 0  | 0  | Not-determined | Genome-fragment | NA    | 0     |
| 57-final-viral-combined_k141_84148   | [full]   | 2737   | No  | NA    | 0  | 1  | Not-determined | Genome-fragment | NA    | 0     |
| 54_k141_130277                       |          | 1844   | No  | NA    | 3  | 0  | Low-quality    | Genome-fragment | 1.06  | 0     |
| 58_k141_139891                       |          | 1844   | No  | NA    | 0  | 0  | Low-quality    | Genome-fragment | 2.66  | 0     |
| 57-final-viral-combined_k141_237955  | [full]   | 2599   | No  | NA    | 0  | 0  | Not-determined | Genome-fragment | NA    | 0     |
| 57-final-viral-combined_k141_73408   | [full]   | 1546   | No  | NA    | 0  | 2  | Not-determined | Genome-fragment | NA    | 0     |
| 57-final-viral-combined_k141_33479   | [full]   | 2997   | No  | NA    | 0  | 0  | Not-determined | Genome-fragment | NA    | 0     |
| 511_k141_57745                       |          | 1845   | No  | NA    | 0  | 0  | Low-quality    | Genome-fragment | 3.33  | 0     |
| 57-final-viral-combined_k141_141661  | [full]   | 1845   | No  | NA    | 1  | 0  | Low-quality    | Genome-fragment | 4.71  | 0     |
| 57_k141_69416                        |          | 1845   | No  | NA    | 0  | 3  | Low-quality    | Genome-fragment | 2.31  | 0     |
| 52-final-viral-combined_k141_28213   | [full]   | 1845   | No  | NA    | 0  | 1  | Low-quality    | Genome-fragment | 2.45  | 0     |
| 58-final-viral-combined_k141_44209   | [full]   | 1845   | No  | NA    | 0  | 0  | Low-quality    | Genome-fragment | 0.71  | 0     |
| 57-final-viral-combined_k141_125239  | [full]   | 1882   | No  | NA    | 0  | 0  | Not-determined | Genome-fragment | NA    | 0     |
| 57-final-viral-combined_k141_125245  | [full]   | 1935   | No  | NA    | 0  | 0  | Not-determined | Genome-fragment | NA    | 0     |
| 57-final-viral-combined_k141_73447   | [full]   | 4511   | No  | NA    | 0  | 2  | Not-determined | Genome-fragment | NA    | 0     |
| 57-final-viral-combined_k141_33572   | [full]   | 2015   | No  | NA    | 0  | 0  | Not-determined | Genome-fragment | NA    | 0     |
| 57-final-viral-combined_k141_176154  | [full]   | 4792   | No  | NA    | 0  | 6  | Not-determined | Genome-fragment | NA    | 0     |
| 57-final-viral-combined_k141_217074  | [full]   | 1474   | No  | NA    | 0  | 2  | Not-d          |                 |       |       |



|                                      |             |       |     |       |    |    |                |                 |    |       |      |
|--------------------------------------|-------------|-------|-----|-------|----|----|----------------|-----------------|----|-------|------|
| 57-final-viral-combined_k141_238122  | [full]      | 1099  | No  | NA    | 0  | 0  | Not-determined | Genome-fragment | NA | 0     | 0    |
| 57-final-viral-combined_k141_437471  | [full]      | 5479  | No  | NA    | 1  | 1  | Not-determined | Genome-fragment | NA | 0     | 0    |
| 57-final-viral-combined_k141_145507  | [full]      | 1272  | No  | NA    | 0  | 1  | Not-determined | Genome-fragment | NA | 0     | 0    |
| 55_k141_145898                       |             | 1849  | No  | NA    | 1  | 0  | Low-quality    | Genome-fragment | NA | 5.02  | 0    |
| 57-final-viral-combined_k141_166390  | [full]      | 5200  | No  | NA    | 0  | 1  | Not-determined | Genome-fragment | NA | 0     | 0    |
| 57-final-viral-combined_k141_227946  | [full]      | 4922  | No  | NA    | 0  | 5  | Not-determined | Genome-fragment | NA | 0     | 0    |
| 57-final-viral-combined_k141_33719   | [full]      | 1174  | No  | NA    | 0  | 1  | Not-determined | Genome-fragment | NA | 0     | 0    |
| 57-final-viral-combined_k141_64855   | [full]      | 1849  | No  | NA    | 0  | 2  | Low-quality    | Genome-fragment | NA | 0     | 0    |
| 52_k141_156762                       |             | 1849  | No  | NA    | 0  | 0  | Low-quality    | Genome-fragment | NA | 3.83  | 0    |
| 511_k141_291960                      |             | 1850  | No  | NA    | 2  | 0  | Low-quality    | Genome-fragment | NA | 3.91  | 0    |
| 511_k141_79422                       |             | 1850  | No  | NA    | 0  | 1  | Low-quality    | Genome-fragment | NA | 3.89  | 0    |
| 51-final-viral-combined_k141_213440  | [H2gene]    | 1850  | No  | NA    | 1  | 0  | Low-quality    | Genome-fragment | NA | 3.34  | 0    |
| 57-final-viral-combined_k141_64111   | [full]      | 1962  | No  | NA    | 0  | 0  | Not-determined | Genome-fragment | NA | 0     | 0    |
| 57-final-viral-combined_k141_29147   | [full]      | 1850  | No  | NA    | 1  | 0  | Low-quality    | Genome-fragment | NA | 0.15  | 0    |
| 57-final-viral-combined_k141_166419  | [full]      | 3451  | No  | NA    | 0  | 1  | Not-determined | Genome-fragment | NA | 0     | 0    |
| 517-k141_150322                      |             | 1850  | No  | NA    | 0  | 1  | Low-quality    | Genome-fragment | NA | 3.3   | 0    |
| 57-final-viral-combined_k141_176375  | [full]      | 1519  | No  | NA    | 0  | 2  | Not-determined | Genome-fragment | NA | 0     | 0    |
| 512-final-viral-combined_k141_50690  | [H2gene]    | 1850  | No  | NA    | 2  | 0  | Low-quality    | Genome-fragment | NA | 3.91  | 0    |
| 512_k141_90707                       |             | 1850  | No  | NA    | 1  | 0  | Low-quality    | Genome-fragment | NA | 1.32  | 0    |
| 57-final-viral-combined_k141_207882  | [full]      | 2996  | No  | NA    | 0  | 2  | Not-determined | Genome-fragment | NA | 0     | 0    |
| 57-final-viral-combined_k141_54020   | [full]      | 1127  | No  | NA    | 0  | 1  | Not-determined | Genome-fragment | NA | 0     | 0    |
| 57-final-viral-combined_k141_445642  | [full]      | 3101  | No  | NA    | 0  | 1  | Not-determined | Genome-fragment | NA | 0     | 0    |
| 54-final-viral-combined_k141_34662   | [full]      | 1850  | No  | NA    | 1  | 0  | Low-quality    | Genome-fragment | NA | 2.2   | 0    |
| 57-final-viral-combined_k141_43858   | [full]      | 1262  | No  | NA    | 0  | 0  | Not-determined | Genome-fragment | NA | 0     | 0    |
| 56-final-viral-combined_k141_11083   | [full]      | 1850  | No  | NA    | 0  | 0  | Low-quality    | Genome-fragment | NA | 3.66  | 0    |
| 57-final-viral-combined_k141_54141   | [full]      | 2246  | No  | NA    | 0  | 2  | Not-determined | Genome-fragment | NA | 0     | 0    |
| 57-final-viral-combined_k141_238214  | [full]      | 1495  | No  | NA    | 0  | 2  | Not-determined | Genome-fragment | NA | 0     | 0    |
| 58_k141_238296                       |             | 1850  | No  | NA    | 0  | 1  | Low-quality    | Genome-fragment | NA | 0.32  | 0    |
| 511-final-viral-combined_k141_262781 | [full]      | 1851  | No  | NA    | 0  | 0  | Low-quality    | Genome-fragment | NA | 3.41  | 0    |
| 57-final-viral-combined_k141_64156   | [full]      | 1004  | No  | NA    | 0  | 1  | Not-determined | Genome-fragment | NA | 0     | 0    |
| 55-final-viral-combined_k141_15928   | [full]      | 1851  | No  | NA    | 0  | 0  | Low-quality    | Genome-fragment | NA | 3.07  | 0    |
| 57-final-viral-combined_k141_187420  | [full]      | 1640  | No  | NA    | 4  | 1  | Not-determined | Genome-fragment | NA | 0     | 0    |
| 57-final-viral-combined_k141_200750  | [full]      | 1851  | No  | NA    | 2  | 0  | Low-quality    | Genome-fragment | NA | 2.27  | 0    |
| 57-final-viral-combined_k141_43915   | [full]      | 1718  | No  | NA    | 0  | 0  | Not-determined | Genome-fragment | NA | 0     | 0    |
| 57-final-viral-combined_k141_43937   | [full]      | 2916  | No  | NA    | 0  | 0  | Not-determined | Genome-fragment | NA | 0     | 0    |
| 57-final-viral-combined_k141_88587   | [full]      | 1851  | No  | NA    | 1  | 0  | Low-quality    | Genome-fragment | NA | 4.44  | 0    |
| 57-final-viral-combined_k141_54096   | [full]      | 2752  | No  | NA    | 0  | 2  | Not-determined | Genome-fragment | NA | 0     | 0    |
| 52-final-viral-combined_k141_29383   | [full]      | 1851  | No  | NA    | 5  | 0  | Low-quality    | Genome-fragment | NA | 2.94  | 0    |
| 58_k141_25514                        |             | 1851  | No  | NA    | 0  | 0  | Low-quality    | Genome-fragment | NA | 1.17  | 0    |
| 511_k141_98049                       |             | 1852  | No  | NA    | 0  | 0  | Low-quality    | Genome-fragment | NA | 3.72  | 0    |
| 53-final-viral-combined_k141_123706  | [full]      | 1852  | No  | NA    | 0  | 0  | Low-quality    | Genome-fragment | NA | 4.1   | 0    |
| 517-final-viral-combined_k141_16012  | [full]      | 1852  | No  | NA    | 0  | 1  | Low-quality    | Genome-fragment | NA | 3.63  | 0    |
| 512-final-viral-combined_k141_304828 | [full]      | 1852  | No  | NA    | 2  | 0  | Low-quality    | Genome-fragment | NA | 0     | 0    |
| 57-final-viral-combined_k141_105081  | [full]      | 2522  | No  | NA    | 0  | 3  | Not-determined | Genome-fragment | NA | 0.66  | 0    |
| 512_k141_128757                      |             | 1852  | No  | NA    | 0  | 0  | Low-quality    | Genome-fragment | NA | 3.22  | 0    |
| 52-final-viral-combined_k141_29859   | [full]      | 1852  | No  | NA    | 1  | 0  | Low-quality    | Genome-fragment | NA | 0     | 0    |
| 57-final-viral-combined_k141_166550  | [full]      | 1816  | No  | NA    | 0  | 0  | Not-determined | Genome-fragment | NA | 0     | 0    |
| 57-final-viral-combined_k141_187567  | [full]      | 3391  | No  | NA    | 0  | 2  | Not-determined | Genome-fragment | NA | 0     | 0    |
| 57-final-viral-combined_k141_187420  | [full]      | 13129 | No  | NA    | 0  | 0  | Not-determined | Genome-fragment | NA | 0     | 0    |
| 57-final-viral-combined_k141_238231  | [full]      | 83333 | Yes | 32253 | 14 | 34 | Medium-quality | Genome-fragment | NA | 61.22 | 61.3 |
| 57-final-viral-combined_k141_64211   | [full]      | 3687  | No  | NA    | 0  | 1  | Not-determined | Genome-fragment | NA | 0     | 0    |
| 57-final-viral-combined_k141_135055  | [full]      | 1296  | No  | NA    | 0  | 0  | Not-determined | Genome-fragment | NA | 0     | 0    |
| 57-final-viral-combined_k141_217230  | [full]      | 2874  | No  | NA    | 0  | 1  | Not-determined | Genome-fragment | NA | 0     | 0    |
| 57-final-viral-combined_k141_33831   | [full]      | 3228  | No  | NA    | 0  | 2  | Not-determined | Genome-fragment | NA | 0     | 0    |
| 57-final-viral-combined_k141_238661  | [full]      | 1264  | No  | NA    | 0  | 0  | Not-determined | Genome-fragment | NA | 0     | 0    |
| 56-final-viral-combined_k141_8378    | [full]      | 1852  | No  | NA    | 0  | 0  | Low-quality    | Genome-fragment | NA | 3.09  | 0    |
| 57-final-viral-combined_k141_228154  | [full]      | 2073  | No  | NA    | 0  | 0  | Not-determined | Genome-fragment | NA | 0     | 0    |
| 57-final-viral-combined_k141_43950   | [full]      | 57129 | No  | NA    | 5  | 10 | High-quality   | High-quality    | NA | 100   | 0    |
| 51-final-viral-combined_k141_144320  | [full]      | 1853  | No  | NA    | 2  | 0  | Low-quality    | Genome-fragment | NA | 3.56  | 0    |
| 57-final-viral-combined_k141_238269  | [full]      | 2047  | No  | NA    | 0  | 1  | Not-determined | Genome-fragment | NA | 0     | 0    |
| 51_k141_354454                       |             | 1853  | No  | NA    | 0  | 1  | Low-quality    | Genome-fragment | NA | 0.26  | 0    |
| 55_k141_201737                       |             | 1853  | No  | NA    | 1  | 0  | Low-quality    | Genome-fragment | NA | 1.27  | 0    |
| 57-final-viral-combined_k141_212777  | [full]      | 1146  | No  | NA    | 0  | 0  | Not-determined | Genome-fragment | NA | 0     | 0    |
| 517-final-viral-combined_k141_90069  | [full]      | 1853  | No  | NA    | 0  | 0  | Low-quality    | Genome-fragment | NA | 1.31  | 0    |
| 512-final-viral-combined_k141_379515 | [full]      | 1853  | No  | NA    | 0  | 0  | Low-quality    | Genome-fragment | NA | 4.11  | 0    |
| 57-final-viral-combined_k141_115515  | [full]      | 1414  | No  | NA    | 0  | 1  | Not-determined | Genome-fragment | NA | 0     | 0    |
| 54-final-viral-combined_k141_50577   | [full]      | 1853  | No  | NA    | 4  | 0  | Low-quality    | Genome-fragment | NA | 5.35  | 0    |
| 511-final-viral-combined_k141_10209  | [full]      | 1854  | No  | NA    | 1  | 0  | Low-quality    | Genome-fragment | NA | 3.67  | 0    |
| 57-final-viral-combined_k141_19775   | [full]      | 1465  | No  | NA    | 0  | 1  | Not-determined | Genome-fragment | NA | 0     | 0    |
| 57-final-viral-combined_k141_73784   | [full]      | 2129  | No  | NA    | 0  | 0  | Not-determined | Genome-fragment | NA | 0     | 0    |
| 57-final-viral-combined_k141_207979  | [full]      | 1062  | No  | NA    | 0  | 0  | Not-determined | Genome-fragment | NA | 0     | 0    |
| 51-final-viral-combined_k141_321148  | [full]      | 1854  | No  | NA    | 0  | 1  | Low-quality    | Genome-fragment | NA | 1.11  | 0    |
| 512-final-viral-combined_k141_353428 | [full]      | 1854  | No  | NA    | 0  | 1  | Low-quality    | Genome-fragment | NA | 1.49  | 0    |
| 57-final-viral-combined_k141_115556  | [full]      | 1974  | No  | NA    | 0  | 2  | Not-determined | Genome-fragment | NA | 0     | 0    |
| 512-final-viral-combined_k141_29572  | [full]      | 1854  | No  | NA    | 0  | 2  | Low-quality    | Genome-fragment | NA | 0.61  | 0    |
| 57-final-viral-combined_k141_176693  | [full]      | 2036  | No  | NA    | 0  | 1  | Not-determined | Genome-fragment | NA | 0     | 0    |
| 54-final-viral-combined_k141_30157   | [full]      | 1854  | No  | NA    | 2  | 0  | Low-quality    | Genome-fragment | NA | 1.07  | 0    |
| 57-final-viral-combined_k141_73827   | [full]      | 1723  | No  | NA    | 0  | 2  | Not-determined | Genome-fragment | NA | 0     | 0    |
| 511-final-viral-combined_k141_254255 | [H2gene]    | 1855  | No  | NA    | 0  | 0  | Low-quality    | Genome-fragment | NA | 4.02  | 0    |
| 53-final-viral-combined_k141_23746   | [full]      | 1855  | No  | NA    | 0  | 3  | Low-quality    | Genome-fragment | NA | 3.29  | 0    |
| 52_k141_33330                        |             | 1855  | No  | NA    | 2  | 0  | Low-quality    | Genome-fragment | NA | 4.55  | 0    |
| 517-final-viral-combined_k141_152393 | [full]      | 1855  | No  | NA    | 0  | 0  | Low-quality    | Genome-fragment | NA | 1.07  | 0    |
| 58-final-viral-combined_k141_140447  | [full]      | 1855  | No  | NA    | 1  | 0  | Low-quality    | Genome-fragment | NA | 3.25  | 0    |
| 57-final-viral-combined_k141_238507  | [full]      | 1122  | No  | NA    | 0  | 0  | Not-determined | Genome-fragment | NA | 0     | 0    |
| 51-final-viral-combined_k141_224684  | [0:partial] | 1856  | No  | NA    | 0  | 0  | Low-quality    | Genome-fragment | NA | 32.98 | 0    |
| 57-final-viral-combined_k141_2492    | [full]      | 1856  | No  | NA    | 1  | 0  | Low-quality    | Genome-fragment | NA | 2.96  | 0    |
| 52-final-viral-combined_k141_164596  | [full]      | 1856  | No  | NA    | 2  | 0  | Low-quality    | Genome-fragment | NA | 2.46  | 0    |
| 54_k141_60551                        |             | 1856  | No  | NA    | 3  | 0  | Low-quality    | Genome-fragment | NA | 10.86 | 0    |
| 57-final-viral-combined_k141_105281  | [full]      | 2469  | No  | NA    | 0  | 0  | Not-determined | Genome-fragment | NA | 0     | 0    |
| 57-final-viral-combined_k141_176733  | [full]      | 2262  | No  | NA    | 0  | 2  | Not-determined | Genome-fragment | NA | 0     | 0    |
| 54_k141_6850                         |             | 1856  | No  | NA    | 0  | 0  | Low-quality    | Genome-fragment | NA | 0.94  | 0    |
| 57-final-viral-combined_k141_217380  | [full]      | 1717  | No  | NA    | 0  | 2  | Not-determined | Genome-fragment | NA | 0     | 0    |
| 57-final-viral-combined_k141_125815  | [full]      | 2300  | No  | NA    | 0  | 0  | Not-determined | Genome-fragment | NA | 0     | 0    |
| 57-final-viral-combined_k141_217389  | [full]      | 3468  | No  | NA    | 0  | 3  | Not-determined | Genome-fragment | NA | 0     | 0    |
| 57-final-viral-combined_k141_64305   | [full]      | 1142  | No  | NA    | 0  | 0  | Not-determined | Genome-fragment | NA | 0     | 0    |
| 57-final-viral-combined_k141_208121  | [full]      | 1024  | No  | NA    | 0  | 1  | Not-determined | Genome-fragment | NA | 0     | 0    |
| 57-final-viral-combined_k141_84586   | [full]      | 9235  | No  | NA    | 0  | 3  | Not-determined | Genome-fragment | NA | 0     | 0    |
| 57-final-viral-combined_k141_22958   | [full]      | 2219  | No  | NA    | 0  | 1  | Not-determined | Genome-fragment | NA | 0     | 0    |
| 57-final-viral-combined_k141_3208    | [full]      | 10106 | No  | NA    | 0  | 0  | Not-determined | Genome-fragment | NA | 0     | 0    |
| 511-final-viral-combined_k141_319860 | [full]      | 1857  | No  | NA    | 1  | 0  | Low-quality    | Genome-fragment | NA | 4.67  | 0    |
| 57-final-viral-combined_k141_138507  | [full]      | 1029  | No  | NA    | 0  | 1  | Not-determined | Genome-fragment | NA | 0     | 0    |
| 511-final-viral-combined_k141_284728 | [full]      | 1857  | No  | NA    | 0  | 0  | Low-quality    | Genome-fragment | NA | 3.54  | 0    |
| 57-final-viral-combined_k141_44063   | [full]      | 1792  | No  | NA    | 0  | 1  | Not-determined | Genome-fragment | NA | 0     | 0    |
| 57-final-viral-combined_k141_13531   | [full]      | 3278  | No  | NA    | 0  | 1  | Not-determined | Genome-fragment | NA | 0     | 0    |
| 57-final-viral-combined_k141_145842  | [full]      | 8842  | No  | NA    | 0  | 2  | Not-determined | Genome-fragment | NA | 0     | 0    |
| 57-final-viral-combined_k141_156603  | [full]      | 2426  | No  | NA    | 0  | 1  | Not-determined | Genome-fragment | NA | 0     | 0    |
| 57-final-viral-combined_k141_64348   | [full]      | 7613  | No  | NA    | 0  | 2  | Not-determined | Genome-fragment | NA | 0     | 0    |
| 57-final-viral-combined_k141_187614  | [full]      | 2417  | No  | NA    | 0  | 1  | Not-determined | Genome-fragment | NA | 0     | 0    |
| 57-final-viral-combined_k141_187615  | [full]      | 1762  | No  | NA    | 0  | 0  | Not-determined | Genome-fragment | NA | 0     | 0    |
| 511-final-viral-combined_k141_86951  | [H2gene]    | 1857  | No  | NA    | 1  | 0  | Low-quality    | Genome-fragment | NA | 3.37  | 0    |
| 57-final-viral-combined_k141_34112   | [full]      | 1807  | No  | NA    | 0  | 2  | Not-determined | Genome-fragment | NA | 0     | 0    |
| 51-final-viral-combined_k141_216719  | [0:partial] | 1857  | No  | NA    | 0  | 0  | Low-quality    | Genome-fragment | NA | 35.95 | 0    |
| 57-final-viral-combined_k141_238377  | [full]      | 2774  | No  | NA    | 0  | 2  | Not-determined | Genome-fragment | NA | 0     | 0    |
| 57-final-viral-combined_k141_68012   | [full]      | 1857  | No  | NA    | 0  | 0  | Low-quality    | Genome-fragment | NA | 2.26  | 0    |
| 57-final-viral-combined_k141_453882  | [full]      | 1162  | No  | NA    | 0  | 0  | Not-determined | Genome-fragment | NA | 0     | 0    |
| 57-final-viral-combined_k141_187640  | [full]      | 1343  | No  | NA    | 0  | 2  | Not-determined | Genome-fragment | NA | 0     | 0    |
| 57-final-viral-combined_k141_197899  | [full]      | 1622  | No  | NA    | 0  | 2  | Not-determined | Genome-fragment | NA | 0     | 0    |
| 57-final-viral-combined_k141_208201  | [full]      | 1624  | No  | NA    | 0  | 1  | Not-determined | Genome-fragment | NA | 0     | 0    |
| 57-final-viral-combined_k141_14431   | [full]      | 1783  | No  | NA    | 0  | 0  | Not-determined | Genome-fragment | NA | 0     | 0    |
| 57-final-viral-combined_k141_72937   | [H2gene]    | 1857  | No  | NA    | 2  | 0  | Low-quality    | Genome-fragment | NA | 5.77  | 0    |
| 52-final-viral-combined_k141_6231    | [H2gene]    | 1857  | No  | NA    | 2  | 0  | Low-quality    | Genome-fragment | NA | 3.93  | 0    |
| 57-final-viral-combined_k141_24187   | [full]      | 200   |     |       |    |    |                |                 |    |       |      |



|                                      |            |       |    |     |                |                 |       |       |
|--------------------------------------|------------|-------|----|-----|----------------|-----------------|-------|-------|
| 511_k141_70809                       | 1861 No    | NA    | 0  | 0   | Low-quality    | Genome-fragment | 2.07  | 0     |
| 55-final-viral-combined_k141_80377   | 1861 No    | NA    | 0  | 0   | Low-quality    | Genome-fragment | 2.26  | 0     |
| 517-final-viral-combined_k141_111131 | 1861 No    | NA    | 2  | 0   | Low-quality    | Genome-fragment | 4.48  | 0     |
| 57-final-viral-combined_k141_217573  | 5392 No    | NA    | 0  | 2   | Not-determined | Genome-fragment | NA    | 0     |
| 57-final-viral-combined_k141_34377   | 1855 No    | NA    | 0  | 0   | Not-determined | Genome-fragment | NA    | 0     |
| 517-final-viral-combined_k141_245008 | 1861 No    | NA    | 0  | 1   | Low-quality    | Genome-fragment | 0.86  | 0     |
| 57-final-viral-combined_k141_187946  | 1129 No    | NA    | 0  | 3   | Not-determined | Genome-fragment | NA    | 0     |
| 517_k141_155048                      | 1861 No    | NA    | 0  | 2   | Low-quality    | Genome-fragment | 0.69  | 0     |
| 512-final-viral-combined_k141_86952  | 1861 No    | NA    | 0  | 0   | Low-quality    | Genome-fragment | 3.98  | 0     |
| 57-final-viral-combined_k141_116013  | 1074 No    | NA    | 0  | 2   | Not-determined | Genome-fragment | NA    | 0     |
| 57-final-viral-combined_k141_187957  | 1068 No    | NA    | 0  | 2   | Not-determined | Genome-fragment | NA    | 0     |
| 57-final-viral-combined_k141_187959  | 3105 No    | NA    | 0  | 3   | Not-determined | Genome-fragment | NA    | 0     |
| 512-final-viral-combined_k141_246231 | 1861 No    | NA    | 4  | 0   | Low-quality    | Genome-fragment | 5.38  | 0     |
| 54-final-viral-combined_k141_51357   | 1861 Yes   | 294   | 1  | 1   | Low-quality    | Genome-fragment | 0.49  | 84.2  |
| 57-final-viral-combined_k141_238642  | 1998 No    | NA    | 0  | 0   | Not-determined | Genome-fragment | NA    | 0     |
| 57-final-viral-combined_k141_54730   | 1721 No    | NA    | 0  | 0   | Not-determined | Genome-fragment | NA    | 0     |
| 54-final-viral-combined_k141_137375  | 1861 No    | NA    | 0  | 2   | Low-quality    | Genome-fragment | 2.73  | 0     |
| 57-final-viral-combined_k141_238678  | 2093 No    | NA    | 0  | 0   | Not-determined | Genome-fragment | NA    | 0     |
| 58_k141_217379                       | 1861 No    | NA    | 0  | 0   | Low-quality    | Genome-fragment | 2.66  | 0     |
| 511-final-viral-combined_k141_264513 | 1862 No    | NA    | 0  | 0   | Low-quality    | Genome-fragment | 5.23  | 0     |
| 511_k141_45322                       | 1862 No    | NA    | 0  | 1   | Low-quality    | Genome-fragment | 1.54  | 0     |
| 57-final-viral-combined_k141_34421   | 1320 No    | NA    | 0  | 0   | Not-determined | Genome-fragment | NA    | 0     |
| 57-final-viral-combined_k141_238690  | 1077 No    | NA    | 0  | 0   | Not-determined | Genome-fragment | NA    | 0     |
| 57_k141_6779                         | 1862 No    | NA    | 0  | 2   | Low-quality    | Genome-fragment | 1.23  | 0     |
| 57-final-viral-combined_k141_34431   | 3248 No    | NA    | 0  | 2   | Not-determined | Genome-fragment | NA    | 0     |
| 57-final-viral-combined_k141_228579  | 2010 No    | NA    | 0  | 0   | Not-determined | Genome-fragment | NA    | 0     |
| 57-final-viral-combined_k141_44370   | 1014 No    | NA    | 0  | 1   | Not-determined | Genome-fragment | NA    | 0     |
| 57-final-viral-combined_k141_208577  | 3560 No    | NA    | 0  | 1   | Not-determined | Genome-fragment | NA    | 0     |
| 517_k141_58664                       | 1862 No    | NA    | 0  | 2   | Low-quality    | Genome-fragment | 2.194 | 0     |
| 512-final-viral-combined_k141_225901 | 1862 No    | NA    | 1  | 0   | Low-quality    | Genome-fragment | 3.98  | 0     |
| 57-final-viral-combined_k141_126166  | 1634 No    | NA    | 0  | 0   | Not-determined | Genome-fragment | NA    | 0     |
| 57-final-viral-combined_k141_146253  | 3557 No    | NA    | 0  | 0   | Not-determined | Genome-fragment | NA    | 0     |
| 54_k141_115556                       | 1862 No    | NA    | 0  | 0   | Low-quality    | Genome-fragment | 2.95  | 0     |
| 57-final-viral-combined_k141_177154  | 3692 No    | NA    | 0  | 4   | Not-determined | Genome-fragment | NA    | 0     |
| 57-final-viral-combined_k141_44406   | 1475 No    | NA    | 0  | 2   | Not-determined | Genome-fragment | NA    | 0     |
| 58-final-viral-combined_k141_176316  | 1862 No    | NA    | 0  | 0   | Low-quality    | Genome-fragment | 1.78  | 0     |
| 57-final-viral-combined_k141_167246  | 6456 No    | NA    | 0  | 4   | Not-determined | Genome-fragment | NA    | 0     |
| 57-final-viral-combined_k141_44421   | 3288 No    | NA    | 0  | 2   | Not-determined | Genome-fragment | NA    | 0     |
| 57-final-viral-combined_k141_167274  | 1535 No    | NA    | 1  | 1   | Not-determined | Genome-fragment | NA    | 0     |
| 58-final-viral-combined_k141_257330  | 1862 No    | NA    | 1  | 0   | Low-quality    | Genome-fragment | 29.66 | 0     |
| 57-final-viral-combined_k141_116181  | 3060 No    | NA    | 0  | 2   | Not-determined | Genome-fragment | NA    | 0     |
| 57-final-viral-combined_k141_238745  | 2804 No    | NA    | 0  | 2   | Not-determined | Genome-fragment | NA    | 0     |
| 57-final-viral-combined_k141_74356   | 1387 No    | NA    | 0  | 2   | Not-determined | Genome-fragment | NA    | 0     |
| 57-final-viral-combined_k141_85051   | 2289 No    | NA    | 0  | 0   | Not-determined | Genome-fragment | NA    | 0     |
| 51-final-viral-combined_k141_14803   | 1863 No    | NA    | 0  | 0   | Low-quality    | Genome-fragment | 5.28  | 0     |
| 57-final-viral-combined_k141_198251  | 1927 No    | NA    | 0  | 2   | Not-determined | Genome-fragment | NA    | 0     |
| 57-final-viral-combined_k141_198252  | 1283 No    | NA    | 0  | 0   | Not-determined | Genome-fragment | NA    | 0     |
| 517-final-viral-combined_k141_87459  | 1863 No    | NA    | 0  | 0   | Low-quality    | Genome-fragment | 4.89  | 0     |
| 57-final-viral-combined_k141_177213  | 1865 No    | NA    | 0  | 1   | Not-determined | Genome-fragment | NA    | 0     |
| 517-final-viral-combined_k141_112349 | 1863 No    | NA    | 2  | 0   | Low-quality    | Genome-fragment | 4.52  | 0     |
| 57-final-viral-combined_k141_3699    | 4619 No    | NA    | 3  | 0   | Medium-quality | Genome-fragment | 72.72 | 0     |
| 512-final-viral-combined_k141_136231 | 1862 No    | NA    | 0  | 0   | Low-quality    | Genome-fragment | 2.16  | 0     |
| 57-final-viral-combined_k141_146359  | 2837 No    | NA    | 0  | 1   | Not-determined | Genome-fragment | NA    | 0     |
| 57-final-viral-combined_k141_208644  | 2615 No    | NA    | 0  | 0   | Not-determined | Genome-fragment | NA    | 0     |
| 52-final-viral-combined_k141_213549  | 1863 No    | NA    | 2  | 0   | Low-quality    | Genome-fragment | 3.04  | 0     |
| 57-final-viral-combined_k141_18215   | 4105 No    | NA    | 0  | 0   | Not-determined | Genome-fragment | NA    | 0     |
| 57-final-viral-combined_k141_74417   | 1563 No    | NA    | 0  | 1   | Not-determined | Genome-fragment | NA    | 0     |
| 51-final-viral-combined_k141_34100   | 1864 No    | NA    | 0  | 2   | Low-quality    | Genome-fragment | 1.23  | 0     |
| 54-final-viral-combined_k141_6646    | 1864 No    | NA    | 0  | 0   | Low-quality    | Genome-fragment | 1.36  | 0     |
| 57-final-viral-combined_k141_146381  | 4887 No    | NA    | 0  | 2   | Not-determined | Genome-fragment | NA    | 0     |
| 59-final-viral-combined_k141_26176   | 1865 No    | NA    | 1  | 0   | Low-quality    | Genome-fragment | 4.55  | 0     |
| 57-final-viral-combined_k141_238852  | 2445 No    | NA    | 0  | 1   | Not-determined | Genome-fragment | NA    | 0     |
| 57-final-viral-combined_k141_188137  | 3032 No    | NA    | 0  | 2   | Not-determined | Genome-fragment | NA    | 0     |
| 57-final-viral-combined_k141_64822   | 3551 No    | NA    | 0  | 2   | Not-determined | Genome-fragment | NA    | 0     |
| 57-final-viral-combined_k141_23449   | 3266 No    | NA    | 0  | 2   | Not-determined | Genome-fragment | NA    | 0     |
| 57-final-viral-combined_k141_74498   | 1385 No    | NA    | 0  | 2   | Not-determined | Genome-fragment | NA    | 0     |
| 59-final-viral-combined_k141_42766   | 1865 No    | NA    | 0  | 2   | Low-quality    | Genome-fragment | 1.19  | 0     |
| 511-final-viral-combined_k141_138943 | 1865 No    | NA    | 0  | 0   | Low-quality    | Genome-fragment | 0.7   | 0     |
| 511-final-viral-combined_k141_253855 | 1865 No    | NA    | 0  | 0   | Low-quality    | Genome-fragment | 1.33  | 0     |
| 511_k141_167014                      | 1865 No    | NA    | 0  | 1   | Not-determined | Genome-fragment | NA    | 0     |
| 57-final-viral-combined_k141_34621   | 4800 No    | NA    | 0  | 1   | Not-determined | Genome-fragment | NA    | 0     |
| 51-final-viral-combined_k141_183054  | 1865 No    | NA    | 0  | 0   | Low-quality    | Genome-fragment | 4.86  | 0     |
| 57-final-viral-combined_k141_146524  | 5097 No    | NA    | 0  | 5   | Not-determined | Genome-fragment | NA    | 0     |
| 57-final-viral-combined_k141_157146  | 3219 No    | NA    | 0  | 2   | Not-determined | Genome-fragment | NA    | 0     |
| 57-final-viral-combined_k141_177360  | 1385 No    | NA    | 0  | 2   | Not-determined | Genome-fragment | NA    | 0     |
| 57-final-viral-combined_k141_157165  | 1322 No    | NA    | 0  | 0   | Not-determined | Genome-fragment | NA    | 0     |
| 57-final-viral-combined_k141_34665   | 1506 No    | NA    | 0  | 1   | Not-determined | Genome-fragment | NA    | 0     |
| 51-final-viral-combined_k141_175759  | 1865 No    | NA    | 0  | 2   | Low-quality    | Genome-fragment | 0.95  | 0     |
| 55-final-viral-combined_k141_169216  | 1865 No    | NA    | 0  | 0   | Low-quality    | Genome-fragment | 1.29  | 0     |
| 57-final-viral-combined_k141_74445   | 1135 No    | NA    | 0  | 0   | Not-determined | Genome-fragment | NA    | 0     |
| 57-final-viral-combined_k141_177383  | 1474 No    | NA    | 0  | 1   | Not-determined | Genome-fragment | NA    | 0     |
| 57-final-viral-combined_k141_64940   | 3289 No    | NA    | 0  | 3   | Not-determined | Genome-fragment | NA    | 0     |
| 57-final-viral-combined_k141_44637   | 3268 No    | NA    | 0  | 2   | Not-determined | Genome-fragment | NA    | 0     |
| 57-final-viral-combined_k141_74677   | 1469 No    | NA    | 0  | 1   | Not-determined | Genome-fragment | NA    | 0     |
| 52_k141_178711                       | 1865 No    | NA    | 0  | 0   | Low-quality    | Genome-fragment | 0.32  | 0     |
| 59-final-viral-combined_k141_64367   | 1866 No    | NA    | 0  | 0   | Low-quality    | Genome-fragment | 1.05  | 0     |
| 57-final-viral-combined_k141_177396  | 1961 No    | NA    | 0  | 2   | Not-determined | Genome-fragment | NA    | 0     |
| 511-final-viral-combined_k141_315484 | 1866 No    | NA    | 2  | 0   | Low-quality    | Genome-fragment | 4.16  | 0     |
| 51-final-viral-combined_k141_316151  | 1866 No    | NA    | 0  | 0   | Low-quality    | Genome-fragment | 4.35  | 0     |
| 57-final-viral-combined_k141_59227   | 2218 No    | NA    | 0  | 0   | Not-determined | Genome-fragment | NA    | 0     |
| 57-final-viral-combined_k141_239068  | 2693 No    | NA    | 0  | 2   | Not-determined | Genome-fragment | NA    | 0     |
| 51_k141_177569                       | 1866 No    | NA    | 0  | 0   | Low-quality    | Genome-fragment | 1.71  | 0     |
| 57-final-viral-combined_k141_64994   | 1296 No    | NA    | 0  | 2   | Not-determined | Genome-fragment | NA    | 0     |
| 57-final-viral-combined_k141_14038   | 2226 No    | NA    | 0  | 3   | Not-determined | Genome-fragment | NA    | 0     |
| 53-final-viral-combined_k141_472644  | 1866 No    | NA    | 0  | 0   | Low-quality    | Genome-fragment | 3.8   | 0     |
| 57-final-viral-combined_k141_85315   | 1197 No    | NA    | 0  | 0   | Not-determined | Genome-fragment | NA    | 0     |
| 57-final-viral-combined_k141_3697    | 225771 Yes | 56703 | 13 | 109 | Medium-quality | Genome-fragment | 70.06 | 74.88 |
| 55-final-viral-combined_k141_100542  | 1866 No    | NA    | 0  | 0   | Low-quality    | Genome-fragment | 4.12  | 0     |
| 57-final-viral-combined_k141_14056   | 2055 No    | NA    | 0  | 1   | Not-determined | Genome-fragment | NA    | 0     |
| 57-final-viral-combined_k141_65033   | 2893 No    | NA    | 0  | 0   | Not-determined | Genome-fragment | NA    | 0     |
| 57-final-viral-combined_k141_146593  | 4925 No    | NA    | 0  | 1   | Not-determined | Genome-fragment | NA    | 0     |
| 57-final-viral-combined_k141_14650   | 2804 No    | NA    | 0  | 1   | Not-determined | Genome-fragment | NA    | 0     |
| 57-final-viral-combined_k141_217783  | 2160 No    | NA    | 0  | 1   | Not-determined | Genome-fragment | NA    | 0     |
| 57-final-viral-combined_k141_105774  | 1681 No    | NA    | 0  | 0   | Not-determined | Genome-fragment | NA    | 0     |
| 57-final-viral-combined_k141_126511  | 3618 No    | NA    | 0  | 4   | Not-determined | Genome-fragment | NA    | 0     |
| 55-final-viral-combined_k141_199544  | 1866 No    | NA    | 1  | 0   | Low-quality    | Genome-fragment | 4.56  | 0     |
| 57-final-viral-combined_k141_208916  | 2206 No    | NA    | 0  | 0   | Not-determined | Genome-fragment | NA    | 0     |
| 54-final-viral-combined_k141_108423  | 1866 No    | NA    | 0  | 2   | Low-quality    | Genome-fragment | 1.77  | 0     |
| 57-final-viral-combined_k141_85343   | 11739 No   | NA    | 0  | 0   | Not-determined | Genome-fragment | NA    | 0     |
| 511_k141_171715                      | 1867 No    | NA    | 0  | 2   | Low-quality    | Genome-fragment | 0.6   | 0     |
| 57-final-viral-combined_k141_136401  | 1398 No    | NA    | 0  | 0   | Not-determined | Genome-fragment | NA    | 0     |
| 57-final-viral-combined_k141_146625  | 1790 No    | NA    | 0  | 2   | Not-determined | Genome-fragment | NA    | 0     |
| 51-final-viral-combined_k141_274876  | 1867 No    | NA    | 0  | 2   | Low-quality    | Genome-fragment | 1.05  | 0     |
| 51_k141_278006                       | 1867 No    | NA    | 0  | 0   | Low-quality    | Genome-fragment | 1.36  | 0     |
| 57-final-viral-combined_k141_177526  | 2211 No    | NA    | 0  | 2   | Not-determined | Genome-fragment | NA    | 0     |
| 57-final-viral-combined_k141_157195  | 10470 No   | NA    | 0  | 2   | Not-determined | Genome-fragment | NA    | 0     |
| 53-final-viral-combined_k141_16719   | 1867 No    | NA    | 0  | 0   | Low-quality    | Genome-fragment | 3.55  | 0     |
| 57-final-viral-combined_k141_85383   | 4641 No    | NA    | 0  | 3   | Not-determined | Genome-fragment | NA    | 0     |
| 57-final-viral-combined_k141_212073  | 1867 No    | NA    | 0  | 1   | Low-quality    | Genome-fragment | 3.59  | 0     |
| 57-final-viral-combined_k141_85367   | 1131 No    | NA    | 0  | 0   | Not-determined | Genome-fragment | NA    | 0     |
| 57-final-viral-combined_k141_236005  | 1867 No    | NA    | 1  | 0   | Low-quality    | Genome-fragment | 4.16  | 0     |
| 517-final-viral-combined_k141_213609 | 1867 No    | NA    | 0  | 0   | Low-quality    | Genome-fragment | 3.47  | 0     |
| 57-final-viral-combined_k141_54716   | 2972 No    | NA    | 0  | 2   | Not-determined | Genome-fragment | NA    | 0     |
| 57-final-viral-combined_k141_126551  | 7249 No    | NA    | 0  | 3   | Not-determined | Genome-fragment | NA    | 0     |
| 57-final-viral-combined_k141_177558  | 1265 No    | NA    | 0  | 0   | Not-determined | Genome-fragment | NA    | 0     |
| 517_k141_100424                      | 1867 No    | NA    | 0  | 0   | Low-quality    | Genome-fragment | 2.24  | 0     |
| 56-final-viral-combined_k141_55974   | 1867 No    | NA    | 3  | 0   | Low-quality    | Genome-fragment | 3.55  | 0     |
| 57-final-viral-combined_k141_136516  | 1243 No    | NA    | 0  | 0   | Not-determined | Genome-fragment | NA    | 0     |
| 57-final-viral-combined_k141_95393   | 2330 No    | NA    | 0  | 0   | Not-determined | Genome-fragment | NA    | 0     |
| 59-final-viral-combined_k141_99466   | 1868 No    | NA    | 0  | 1   | Low-quality    | Genome-fragment | 3.98  | 0     |
| 57-final-viral-combined_k141_54773   | 2211 No    | NA    | 0  | 1   | Not-determined | Genome-fragment | NA    | 0     |
| 51-final-viral-combined_k141_200095  | 1868 No    | NA    | 0  | 0   | Low-quality    | Genome-fragment | 2.71  | 0     |
| 57-final-viral-combined_k141_106278  | 1868 No    | NA    | 1  | 0   | Low-quality    | Genome-fragment | 5.3   | 0     |
| 517-final-viral-combined_k141_221322 | 1868 No    | NA    | 1  | 0   | Low-quality    | Genome-fragment | 4.88  | 0     |
| 57-final-viral-combined_k141_188420  | 1206 No    | NA    | 0  | 1   | Not-determined | Genome-fragment | NA    | 0     |
| 57-final-viral-combined_k141_116427  | 1412 No    | NA    | 0  | 1   | Not-determined | Genome-fragment | NA    | 0     |
| 512-final-viral-combined_k141_230416 | 1868 No    | NA    | 0  | 2   | Low-quality    | Genome-fragment | 1.4   | 0     |
| 58-final-viral-combined_k141_263026  | 1868 No    | NA    | 0  | 1   | Low-quality    | Genome-fragment | 2.09  | 0     |
| 57-final-viral-combined_k141_198524  | 2032 No    | NA    | 0  | 2   | Not-determined | Genome-fragment | NA    | 0     |
| 57-final-viral-combined_k141_54806   | 2183 No    | NA    | 0  | 1   | Not-determined | Genome-fragment | NA    | 0     |
| 58_k141_69471                        | 1868 No    | NA    | 0  | 0   | Low-quality    | Genome-fragment | 1.94  | 0     |
| 51-final-viral-combined_k141_386415  | 1869 No    | NA    | 0  | 2   | Low-quality    | Genome-fragment | 3.38  | 0     |
| 57-final-viral-combined_k141_177679  | 1205 No    | NA    | 0  | 1   | Not-determined | Genome-fragment | NA    | 0     |
| 57-final-viral-combined_k141_14894   | 7068 No    | NA    |    |     |                |                 |       |       |



|                                      |          |       |     |      |       |    |                |                 |                 |       |       |
|--------------------------------------|----------|-------|-----|------|-------|----|----------------|-----------------|-----------------|-------|-------|
| S2-final-viral-combined_k141_3848    | [full]   | 1870  | No  | NA   | 1     | 0  | Low-quality    | Genome-fragment | 4.69            | 0     |       |
| S11-final-viral-combined_k141_188751 | [full]   | 1871  | No  | NA   | 0     | 0  | Low-quality    | Genome-fragment | 5.47            | 0     |       |
| S7-final-viral-combined_k141_54893   | [full]   | 3220  | No  | NA   | 0     | 0  | Not-determined | Genome-fragment | NA              | 0     |       |
| S7-final-viral-combined_k141_54896   | [full]   | 5196  | No  | NA   | 0     | 0  | Not-determined | Genome-fragment | NA              | 0     |       |
| S1-final-viral-combined_k141_252897  | [full]   | 1871  | Yes | NA   | 1     | 1  | Low-quality    | Genome-fragment | 1.63            | 68.15 |       |
| S7-final-viral-combined_k141_3921    | [full]   | 2608  | No  | NA   | 0     | 1  | Not-determined | Genome-fragment | NA              | 0     |       |
| S7-final-viral-combined_k141_54910   | [full]   | 2015  | No  | NA   | 0     | 2  | Not-determined | Genome-fragment | NA              | 0     |       |
| S7-final-viral-combined_k141_74181   | [full]   | 1871  | No  | NA   | 1     | 0  | Low-quality    | Genome-fragment | 2.69            | 0     |       |
| S7-final-viral-combined_k141_20907   | [full]   | 1012  | No  | NA   | 0     | 1  | Not-determined | Genome-fragment | NA              | 0     |       |
| S17-final-viral-combined_k141_142203 | [full]   | 1871  | No  | NA   | 0     | 2  | Low-quality    | Genome-fragment | 2.54            | 0     |       |
| S2-final-viral-combined_k141_232090  | [full]   | 1871  | No  | NA   | 0     | 1  | Low-quality    | Genome-fragment | 1.38            | 0     |       |
| S7-final-viral-combined_k141_157150  | [full]   | 4534  | No  | NA   | 0     | 1  | Not-determined | Genome-fragment | NA              | 0     |       |
| S7-final-viral-combined_k141_25000   | [full]   | 1162  | No  | NA   | 0     | 0  | Not-determined | Genome-fragment | NA              | 0     |       |
| S6-final-viral-combined_k141_51203   | [full]   | 1871  | No  | NA   | 0     | 2  | Low-quality    | Genome-fragment | 1.04            | 0     |       |
| S1-final-viral-combined_k141_14986   | [full]   | 1872  | No  | NA   | 0     | 0  | Low-quality    | Genome-fragment | 3.6             | 0     |       |
| S7-final-viral-combined_k141_165285  | [full]   | 1872  | No  | NA   | 0     | 1  | Low-quality    | Genome-fragment | 3.42            | 0     |       |
| S7-final-viral-combined_k141_126805  | [full]   | 2591  | No  | NA   | 0     | 2  | Not-determined | Genome-fragment | NA              | 0     |       |
| S7-final-viral-combined_k141_146841  | [full]   | 2572  | No  | NA   | 0     | 1  | Not-determined | Genome-fragment | NA              | 0     |       |
| S7-final-viral-combined_k141_5300    | [full]   | 1872  | No  | NA   | 0     | 1  | Low-quality    | Genome-fragment | 0.5             | 0     |       |
| S7_k141_198074                       |          | 1872  | No  | NA   | 0     | 0  | Low-quality    | Genome-fragment | 4.13            | 0     |       |
| S12-final-viral-combined_k141_276857 | [full]   | 1872  | Yes | NA   | 1695  | 1  | 1              | Low-quality     | Genome-fragment | 3.62  | 9.46  |
| S7-final-viral-combined_k141_126051  | [full]   | 1173  | No  | NA   | 0     | 2  | Not-determined | Genome-fragment | NA              | 0     |       |
| S2-final-viral-combined_k141_57529   | [full]   | 1872  | No  | NA   | 0     | 2  | Low-quality    | Genome-fragment | 0.54            | 0     |       |
| S2_k141_77097                        |          | 1872  | No  | NA   | 0     | 1  | Low-quality    | Genome-fragment | 1.04            | 0     |       |
| S6_k141_94758                        |          | 1872  | No  | NA   | 0     | 0  | Low-quality    | Genome-fragment | 3.52            | 0     |       |
| S7-final-viral-combined_k141_85569   | [full]   | 5358  | No  | NA   | 0     | 4  | Not-determined | Genome-fragment | NA              | 0     |       |
| S11-final-viral-combined_k141_129466 | [H2gene] | 1873  | No  | NA   | 2     | 0  | Low-quality    | Genome-fragment | 5.68            | 0     |       |
| S1-final-viral-combined_k141_5803    | [full]   | 1873  | No  | NA   | 5     | 0  | Low-quality    | Genome-fragment | 4.28            | 0     |       |
| S7-final-viral-combined_k141_106140  | [full]   | 2768  | No  | NA   | 1     | 1  | Not-determined | Genome-fragment | NA              | 0     |       |
| S1-final-viral-combined_k141_130989  | [full]   | 1873  | No  | NA   | 1     | 0  | Low-quality    | Genome-fragment | 1.13            | 0     |       |
| S7-final-viral-combined_k141_177875  | [full]   | 2941  | No  | NA   | 0     | 2  | Not-determined | Genome-fragment | NA              | 0     |       |
| S1-final-viral-combined_k141_354873  | [H2gene] | 1873  | No  | NA   | 0     | 0  | Low-quality    | Genome-fragment | 5.11            | 0     |       |
| S5-final-viral-combined_k141_184365  | [full]   | 1873  | No  | NA   | 0     | 0  | Low-quality    | Genome-fragment | 3.78            | 0     |       |
| S7-final-viral-combined_k141_69129   | [full]   | 1873  | No  | NA   | 0     | 1  | Low-quality    | Genome-fragment | 3.16            | 0     |       |
| S7-final-viral-combined_k141_106181  | [full]   | 2564  | No  | NA   | 0     | 0  | Not-determined | Genome-fragment | NA              | 0     |       |
| S7-final-viral-combined_k141_126870  | [full]   | 3318  | No  | NA   | 0     | 1  | Not-determined | Genome-fragment | NA              | 0     |       |
| S7-final-viral-combined_k141_177887  | [full]   | 1177  | No  | NA   | 0     | 0  | Not-determined | Genome-fragment | NA              | 0     |       |
| S7-final-viral-combined_k141_55042   | [full]   | 2726  | No  | NA   | 0     | 0  | Not-determined | Genome-fragment | NA              | 0     |       |
| S17-final-viral-combined_k141_943871 | [full]   | 1873  | No  | NA   | 0     | 1  | Low-quality    | Genome-fragment | 0.98            | 0     |       |
| S7-final-viral-combined_k141_106212  | [full]   | 2745  | No  | NA   | 0     | 0  | Not-determined | Genome-fragment | NA              | 0     |       |
| S7-final-viral-combined_k141_142677  | [full]   | 64555 | Yes | NA   | 26929 | 4  | 21             | Medium-quality  | Genome-fragment | 66.42 | 58.31 |
| S7-final-viral-combined_k141_129130  | [full]   | 4628  | No  | NA   | 0     | 4  | Not-determined | Genome-fragment | NA              | 0     |       |
| S7-final-viral-combined_k141_136660  | [full]   | 2355  | No  | NA   | 0     | 0  | Not-determined | Genome-fragment | NA              | 0     |       |
| S7-final-viral-combined_k141_157434  | [full]   | 35581 | No  | NA   | 1     | 11 | Medium-quality | Genome-fragment | 65.85           | 0     |       |
| S12-final-viral-combined_k141_359252 | [full]   | 1873  | No  | NA   | 2     | 0  | Low-quality    | Genome-fragment | 3.57            | 0     |       |
| S7-final-viral-combined_k141_15668   | [full]   | 2456  | No  | NA   | 0     | 1  | Not-determined | Genome-fragment | NA              | 0     |       |
| S7-final-viral-combined_k141_217912  | [full]   | 1607  | No  | NA   | 0     | 0  | Not-determined | Genome-fragment | NA              | 0     |       |
| S7-final-viral-combined_k141_239457  | [full]   | 2785  | No  | NA   | 0     | 0  | Not-determined | Genome-fragment | NA              | 0     |       |
| S7-final-viral-combined_k141_167876  | [full]   | 13007 | No  | NA   | 0     | 11 | Medium-quality | Genome-fragment | 59.86           | 0     |       |
| S12-final-viral-combined_k141_60101  | [full]   | 1873  | No  | NA   | 2     | 0  | Low-quality    | Genome-fragment | 3.47            | 0     |       |
| S7-final-viral-combined_k141_209166  | [full]   | 5491  | No  | NA   | 0     | 1  | Not-determined | Genome-fragment | NA              | 0     |       |
| S7-final-viral-combined_k141_106241  | [full]   | 1687  | No  | NA   | 0     | 0  | Not-determined | Genome-fragment | NA              | 0     |       |
| S2-final-viral-combined_k141_31370   | [full]   | 1873  | No  | NA   | 0     | 1  | Low-quality    | Genome-fragment | 1.21            | 0     |       |
| S7-final-viral-combined_k141_239470  | [full]   | 1482  | No  | NA   | 0     | 0  | Not-determined | Genome-fragment | NA              | 0     |       |
| S8-final-viral-combined_k141_148860  | [H2gene] | 1873  | No  | NA   | 1     | 0  | Low-quality    | Genome-fragment | 4.49            | 0     |       |
| S7-final-viral-combined_k141_217928  | [full]   | 2846  | No  | NA   | 0     | 2  | Not-determined | Genome-fragment | NA              | 0     |       |
| S7-final-viral-combined_k141_95651   | [full]   | 1842  | No  | NA   | 0     | 1  | Not-determined | Genome-fragment | NA              | 0     |       |
| S11-final-viral-combined_k141_43609  | [full]   | 1874  | No  | NA   | 0     | 0  | Low-quality    | Genome-fragment | 1.65            | 0     |       |
| S11-final-viral-combined_k141_312913 | [full]   | 1874  | No  | NA   | 0     | 0  | Low-quality    | Genome-fragment | 1.22            | 0     |       |
| S7-final-viral-combined_k141_126970  | [full]   | 1783  | No  | NA   | 0     | 1  | Not-determined | Genome-fragment | NA              | 0     |       |
| S7-final-viral-combined_k141_65679   | [full]   | 1867  | No  | NA   | 0     | 0  | Not-determined | Genome-fragment | NA              | 0     |       |
| S7-final-viral-combined_k141_95682   | [full]   | 2259  | No  | NA   | 0     | 3  | Not-determined | Genome-fragment | NA              | 0     |       |
| S1-final-viral-combined_k141_215020  | [full]   | 1874  | No  | NA   | 0     | 1  | Low-quality    | Genome-fragment | 1.6             | 0     |       |
| S7-final-viral-combined_k141_167881  | [full]   | 1268  | No  | NA   | 0     | 0  | Not-determined | Genome-fragment | NA              | 0     |       |
| S1-final-viral-combined_k141_139193  | [full]   | 1874  | No  | NA   | 0     | 0  | Low-quality    | Genome-fragment | 4.1             | 0     |       |
| S7-final-viral-combined_k141_23887   | [full]   | 1174  | No  | NA   | 0     | 0  | Not-determined | Genome-fragment | NA              | 0     |       |
| S1_k141_95757                        |          | 1874  | No  | NA   | 1     | 0  | Low-quality    | Genome-fragment | 4.5             | 0     |       |
| S3-final-viral-combined_k141_112468  | [full]   | 1874  | No  | NA   | 1     | 0  | Low-quality    | Genome-fragment | 4.46            | 0     |       |
| S7-final-viral-combined_k141_239580  | [full]   | 1873  | No  | NA   | 0     | 1  | Not-determined | Genome-fragment | NA              | 0     |       |
| S5_k141_98065                        |          | 1874  | No  | NA   | 0     | 0  | Low-quality    | Genome-fragment | 1.69            | 0     |       |
| S2-final-viral-combined_k141_246776  | [full]   | 1874  | No  | NA   | 0     | 1  | Low-quality    | Genome-fragment | 1.18            | 0     |       |
| S6_k141_93659                        |          | 1874  | No  | NA   | 0     | 0  | Low-quality    | Genome-fragment | 3.25            | 0     |       |
| S8-final-viral-combined_k141_107147  | [full]   | 1874  | No  | NA   | 0     | 0  | Low-quality    | Genome-fragment | 3.59            | 0     |       |
| S7-final-viral-combined_k141_189960  | [full]   | 1792  | No  | NA   | 0     | 1  | Not-determined | Genome-fragment | NA              | 0     |       |
| S1_k141_34663                        |          | 1875  | No  | NA   | 0     | 0  | Low-quality    | Genome-fragment | 4.42            | 0     |       |
| S7-final-viral-combined_k141_127047  | [full]   | 2562  | No  | NA   | 0     | 0  | Not-determined | Genome-fragment | NA              | 0     |       |
| S7-final-viral-combined_k141_55228   | [full]   | 1479  | No  | NA   | 0     | 1  | Not-determined | Genome-fragment | NA              | 0     |       |
| S1_k141_210746                       |          | 1875  | No  | NA   | 1     | 0  | Low-quality    | Genome-fragment | 3.54            | 0     |       |
| S7-final-viral-combined_k141_106253  | [full]   | 98669 | Yes | NA   | 38269 | 10 | 45             | High-quality    | Genome-fragment | 100   | 60.49 |
| S7-final-viral-combined_k141_178035  | [full]   | 1221  | No  | NA   | 0     | 0  | Not-determined | Genome-fragment | NA              | 0     |       |
| S7-final-viral-combined_k141_116804  | [full]   | 2276  | No  | NA   | 0     | 1  | Not-determined | Genome-fragment | NA              | 0     |       |
| S7-final-viral-combined_k141_1410    | [full]   | 1155  | No  | NA   | 0     | 0  | Not-determined | Genome-fragment | NA              | 0     |       |
| S3-final-viral-combined_k141_132071  | [full]   | 1875  | No  | NA   | 0     | 2  | Low-quality    | Genome-fragment | 0.52            | 0     |       |
| S5-final-viral-combined_k141_212925  | [full]   | 1875  | No  | NA   | 0     | 0  | Low-quality    | Genome-fragment | 3.61            | 0     |       |
| S12-final-viral-combined_k141_323350 | [full]   | 1875  | No  | NA   | 0     | 2  | Low-quality    | Genome-fragment | 1.02            | 0     |       |
| S7-final-viral-combined_k141_167940  | [full]   | 2617  | No  | NA   | 0     | 2  | Not-determined | Genome-fragment | NA              | 0     |       |
| S7-final-viral-combined_k141_4150    | [full]   | 2153  | No  | NA   | 0     | 1  | Not-determined | Genome-fragment | NA              | 0     |       |
| S7-final-viral-combined_k141_4152    | [full]   | 1512  | No  | NA   | 0     | 2  | Not-determined | Genome-fragment | NA              | 0     |       |
| S12-final-viral-combined_k141_154388 | [full]   | 1875  | No  | NA   | 0     | 0  | Low-quality    | Genome-fragment | 3.75            | 0     |       |
| S7-final-viral-combined_k141_75091   | [full]   | 6286  | No  | NA   | 0     | 3  | Not-determined | Genome-fragment | NA              | 0     |       |
| S2-final-viral-combined_k141_164448  | [full]   | 1875  | No  | NA   | 0     | 2  | Low-quality    | Genome-fragment | 1.73            | 0     |       |
| S7-final-viral-combined_k141_65825   | [full]   | 7105  | No  | NA   | 0     | 0  | Not-determined | Genome-fragment | NA              | 0     |       |
| S7-final-viral-combined_k141_106295  | [full]   | 4631  | No  | NA   | 0     | 0  | Not-determined | Genome-fragment | NA              | 0     |       |
| S7-final-viral-combined_k141_85801   | [full]   | 1999  | No  | NA   | 0     | 1  | Not-determined | Genome-fragment | NA              | 0     |       |
| S7-final-viral-combined_k141_199038  | [full]   | 3697  | No  | NA   | 0     | 1  | Not-determined | Genome-fragment | NA              | 0     |       |
| S7-final-viral-combined_k141_178064  | [full]   | 1393  | No  | NA   | 0     | 1  | Not-determined | Genome-fragment | NA              | 0     |       |
| S7-final-viral-combined_k141_75133   | [full]   | 2391  | No  | NA   | 0     | 1  | Not-determined | Genome-fragment | NA              | 0     |       |
| S11-final-viral-combined_k141_39213  | [full]   | 1876  | No  | NA   | 1     | 0  | Low-quality    | Genome-fragment | 4.11            | 0     |       |
| S12-final-viral-combined_k141_111665 | [full]   | 1876  | No  | NA   | 0     | 0  | Low-quality    | Genome-fragment | 3.27            | 0     |       |
| S7-final-viral-combined_k141_199049  | [full]   | 2818  | No  | NA   | 0     | 1  | Not-determined | Genome-fragment | NA              | 0     |       |
| S12-final-viral-combined_k141_215080 | [full]   | 1876  | No  | NA   | 0     | 0  | Low-quality    | Genome-fragment | 3.89            | 0     |       |
| S7-final-viral-combined_k141_188671  | [full]   | 1809  | No  | NA   | 0     | 0  | Not-determined | Genome-fragment | NA              | 0     |       |
| S7-final-viral-combined_k141_75156   | [full]   | 2642  | No  | NA   | 0     | 3  | Not-determined | Genome-fragment | NA              | 0     |       |
| S7-final-viral-combined_k141_218086  | [full]   | 4699  | No  | NA   | 0     | 2  | Not-determined | Genome-fragment | NA              | 0     |       |
| S7-final-viral-combined_k141_127212  | [full]   | 1146  | No  | NA   | 0     | 1  | Not-determined | Genome-fragment | NA              | 0     |       |
| S7-final-viral-combined_k141_55309   | [full]   | 5574  | No  | NA   | 0     | 3  | Not-determined | Genome-fragment | NA              | 0     |       |
| S7-final-viral-combined_k141_14414   | [full]   | 1022  | No  | NA   | 0     | 0  | Not-determined | Genome-fragment | NA              | 0     |       |
| S2_k141_44487                        |          | 1876  | No  | NA   | 0     | 1  | Low-quality    | Genome-fragment | 1.22            | 0     |       |
| S7-final-viral-combined_k141_116899  | [full]   | 3288  | No  | NA   | 0     | 0  | Not-determined | Genome-fragment | NA              | 0     |       |
| S11-final-viral-combined_k141_71288  | [full]   | 1877  | No  | NA   | 0     | 1  | Low-quality    | Genome-fragment | 3.17            | 0     |       |
| S7-final-viral-combined_k141_199346  | [full]   | 1258  | No  | NA   | 0     | 0  | Not-determined | Genome-fragment | NA              | 0     |       |
| S7-final-viral-combined_k141_188166  | [full]   | 2017  | No  | NA   | 0     | 0  | Not-determined | Genome-fragment | NA              | 0     |       |
| S7-final-viral-combined_k141_218136  | [full]   | 5863  | No  | NA   | 0     | 3  | Not-determined | Genome-fragment | NA              | 0     |       |
| S7-final-viral-combined_k141_239784  | [full]   | 2844  | No  | NA   | 1     | 3  | Medium-quality | Genome-fragment | 65.41           | 0     |       |
| S11-final-viral-combined_k141_227859 | [full]   | 1877  | No  | NA   | 0     | 0  | Low-quality    | Genome-fragment | 3.1             | 0     |       |
| S7-final-viral-combined_k141_239791  | [full]   | 4304  | No  | NA   | 0     | 1  | Not-determined | Genome-fragment | NA              | 0     |       |
| S1-final-viral-combined_k141_226521  | [full]   | 1877  | No  | NA   | 2     | 0  | Low-quality    | Genome-fragment | 4.31            | 0     |       |
| S7-final-viral-combined_k141_85890   | [full]   | 1364  | No  | NA   | 0     | 0  | Not-determined | Genome-fragment | NA              | 0     |       |
| S3_k141_39927                        |          | 1877  | No  | NA   | 1     | 3  | Low-quality    | Genome-fragment | 4.51            | 0     |       |
| S7-final-viral-combined_k141_209538  | [full]   | 2579  | No  | NA   | 0     | 1  | Not-determined | Genome-fragment | NA              | 0     |       |
| S7-final-viral-combined_k141_136982  | [full]   | 2539  | No  | NA   | 0     | 1  | Not-determined | Genome-fragment | NA              | 0     |       |
| S5_k141_15371                        |          | 1877  | No  | NA   | 0     | 0  | Low-quality    | Genome-fragment | 2.85            | 0     |       |
| S7-final-viral-combined_k141_136993  | [full]   | 2585  | No  | NA   | 0     | 1  | Not-determined | Genome-fragment | NA              | 0     |       |
| S7-final-viral-combined_k141_4334    | [full]   | 4216  | No  | NA   | 0     | 2  | Not-determined | Genome-fragment | NA              | 0     |       |
| S12-final-viral-combined_k141_369451 | [full]   | 1877  | No  | NA   | 0     | 0  | Low-quality    | Genome-fragment | 3.52            | 0     |       |
| S7-final-viral-combined_k141_35482   | [full]   | 1182  | No  | NA   | 0     | 1  | Not-determined | Genome-fragment | NA              | 0     |       |
| S6-final-viral-combined_k141_126715  | [full]   | 1877  | No  | NA   | 0     | 1  | Low-quality    | Genome-fragment | 2.23            | 0     |       |
| S11-final-viral-combined_k141_289254 | [full]   | 1878  | No  | NA   | 0     | 0  | Low-quality    | Genome-fragment | 1.23            | 0     |       |
| S7-final-viral-combined_k141_95985   | [full]   | 3090  | No  | NA   | 0     | 0  | Not-determined | Genome-fragment | NA              | 0     |       |
| S7-final-viral-combined_k141_55351   | [full]   | 2477  | No  | NA</ |       |    |                |                 |                 |       |       |



|                                       |          |       |     |      |   |   |                |                 |    |      |      |
|---------------------------------------|----------|-------|-----|------|---|---|----------------|-----------------|----|------|------|
| 57-final-viral-combined_k141_1580551  | [full]   | 4235  | No  | NA   | 0 | 2 | Not-determined | Genome-fragment | NA | 0    | 0    |
| 57-final-viral-combined_k141_155521   | [full]   | 1881  | No  | NA   | 0 | 0 | Low-quality    | Genome-fragment | NA | 5.5  | 0    |
| 57-final-viral-combined_k141_554899   | [full]   | 3220  | No  | NA   | 0 | 0 | Not-determined | Genome-fragment | NA | 0    | 0    |
| S2_k141_37539                         |          | 1881  | No  | NA   | 0 | 0 | Low-quality    | Genome-fragment | NA | 1.39 | 0    |
| 57-final-viral-combined_k141_45231    | [full]   | 5648  | No  | NA   | 0 | 0 | Not-determined | Genome-fragment | NA | 0    | 0    |
| S8-final-viral-combined_k141_1305461  | [full]   | 1881  | No  | NA   | 0 | 1 | Low-quality    | Genome-fragment | NA | 3.77 | 0    |
| 57-final-viral-combined_k141_754431   | [full]   | 2028  | No  | NA   | 0 | 0 | Not-determined | Genome-fragment | NA | 0    | 0    |
| 57-final-viral-combined_k141_961081   | [full]   | 14883 | No  | NA   | 0 | 1 | Not-determined | Genome-fragment | NA | 0    | 0    |
| 57-final-viral-combined_k141_356731   | [full]   | 1311  | No  | NA   | 0 | 2 | Not-determined | Genome-fragment | NA | 0    | 0    |
| S8-final-viral-combined_k141_1030901  | [full]   | 1881  | No  | NA   | 1 | 0 | Low-quality    | Genome-fragment | NA | 3.51 | 0    |
| 57-final-viral-combined_k141_454721   | [full]   | 1604  | No  | NA   | 0 | 0 | Not-determined | Genome-fragment | NA | 0    | 0    |
| S11-final-viral-combined_k141_110451  | [full]   | 1882  | No  | NA   | 0 | 1 | Low-quality    | Genome-fragment | NA | 2.85 | 0    |
| 57-final-viral-combined_k141_356851   | [full]   | 1681  | No  | NA   | 0 | 1 | Not-determined | Genome-fragment | NA | 0    | 0    |
| S11-final-viral-combined_k141_1808081 | [full]   | 1882  | No  | NA   | 0 | 0 | Low-quality    | Genome-fragment | NA | 4.42 | 0    |
| 57-final-viral-combined_k141_1372161  | [full]   | 3460  | No  | NA   | 0 | 1 | Not-determined | Genome-fragment | NA | 0    | 0    |
| S11-final-viral-combined_k141_1856931 | [full]   | 1882  | Yes | 498  | 1 | 0 | Not-determined | Genome-fragment | NA | 0.26 | 73.4 |
| 57-final-viral-combined_k141_1888971  | [full]   | 1882  | No  | NA   | 0 | 1 | Not-determined | Genome-fragment | NA | 0    | 0    |
| S11-final-viral-combined_k141_3007831 | [full]   | 1882  | No  | NA   | 0 | 0 | Low-quality    | Genome-fragment | NA | 4.45 | 0    |
| 57-final-viral-combined_k141_555731   | [full]   | 2051  | No  | NA   | 0 | 0 | Not-determined | Genome-fragment | NA | 0    | 0    |
| 57-final-viral-combined_k141_1581131  | [full]   | 3918  | No  | NA   | 0 | 3 | Not-determined | Genome-fragment | NA | 0    | 0    |
| 57-final-viral-combined_k141_661701   | [full]   | 2555  | No  | NA   | 0 | 1 | Not-determined | Genome-fragment | NA | 0    | 0    |
| 57-final-viral-combined_k141_1372371  | [full]   | 8421  | No  | NA   | 0 | 2 | Not-determined | Genome-fragment | NA | 0    | 0    |
| 57-final-viral-combined_k141_45951    | [full]   | 1038  | No  | NA   | 0 | 1 | Not-determined | Genome-fragment | NA | 0    | 0    |
| S11-final-viral-combined_k141_692281  | [full]   | 1882  | No  | NA   | 0 | 2 | Low-quality    | Genome-fragment | NA | 1.34 | 0    |
| S1-final-viral-combined_k141_2564881  | [H2gene] | 1882  | No  | NA   | 1 | 0 | Low-quality    | Genome-fragment | NA | 4.57 | 0    |
| 57-final-viral-combined_k141_1064461  | [full]   | 6417  | No  | NA   | 0 | 4 | Not-determined | Genome-fragment | NA | 0    | 0    |
| 57-final-viral-combined_k141_1372661  | [full]   | 1218  | No  | NA   | 0 | 1 | Not-determined | Genome-fragment | NA | 0    | 0    |
| S5-final-viral-combined_k141_1409891  | [full]   | 1882  | No  | NA   | 2 | 0 | Low-quality    | Genome-fragment | NA | 4.91 | 0    |
| 57-final-viral-combined_k141_455381   | [full]   | 1910  | No  | NA   | 0 | 0 | Not-determined | Genome-fragment | NA | 0    | 0    |
| 57-final-viral-combined_k141_1064841  | [full]   | 1950  | No  | NA   | 0 | 2 | Not-determined | Genome-fragment | NA | 0    | 0    |
| S5-final-viral-combined_k141_1553941  | [full]   | 1882  | No  | NA   | 1 | 0 | Low-quality    | Genome-fragment | NA | 5.46 | 0    |
| 57-final-viral-combined_k141_1172561  | [full]   | 2519  | No  | NA   | 0 | 1 | Not-determined | Genome-fragment | NA | 0    | 0    |
| S7_k141_154317                        |          | 1882  | No  | NA   | 0 | 1 | Low-quality    | Genome-fragment | NA | 1.61 | 0    |
| S17-final-viral-combined_k141_2501511 | [full]   | 1882  | No  | NA   | 0 | 0 | Low-quality    | Genome-fragment | NA | 1.3  | 0    |
| 57-final-viral-combined_k141_258201   | [full]   | 1116  | No  | NA   | 0 | 2 | Not-determined | Genome-fragment | NA | 0    | 0    |
| S12-final-viral-combined_k141_318901  | [full]   | 1882  | No  | NA   | 0 | 2 | Low-quality    | Genome-fragment | NA | 2.95 | 0    |
| S12-final-viral-combined_k141_1499001 | [full]   | 1882  | No  | NA   | 0 | 3 | Low-quality    | Genome-fragment | NA | 0.82 | 0    |
| 57-final-viral-combined_k141_556751   | [full]   | 5728  | No  | NA   | 0 | 4 | Not-determined | Genome-fragment | NA | 0    | 0    |
| S2-final-viral-combined_k141_1137681  | [full]   | 1882  | No  | NA   | 0 | 0 | Low-quality    | Genome-fragment | NA | 4.8  | 0    |
| 57-final-viral-combined_k141_962811   | [full]   | 1954  | No  | NA   | 0 | 2 | Not-determined | Genome-fragment | NA | 0    | 0    |
| 57-final-viral-combined_k141_1825141  | [full]   | 5088  | No  | NA   | 0 | 3 | Not-determined | Genome-fragment | NA | 0    | 0    |
| S2_k141_210878                        |          | 1882  | No  | NA   | 0 | 0 | Low-quality    | Genome-fragment | NA | 4.04 | 0    |
| 57-final-viral-combined_k141_663221   | [full]   | 1987  | No  | NA   | 0 | 3 | Not-determined | Genome-fragment | NA | 0    | 0    |
| S4_k141_148627                        |          | 1882  | No  | NA   | 0 | 1 | Low-quality    | Genome-fragment | NA | 5.31 | 0    |
| S4_k141_123084                        |          | 1882  | No  | NA   | 0 | 0 | Low-quality    | Genome-fragment | NA | 2.67 | 0    |
| 57-final-viral-combined_k141_1172931  | [full]   | 9150  | No  | NA   | 0 | 2 | Not-determined | Genome-fragment | NA | 0    | 0    |
| 57-final-viral-combined_k141_862311   | [full]   | 3388  | No  | NA   | 0 | 2 | Not-determined | Genome-fragment | NA | 0    | 0    |
| 57-final-viral-combined_k141_1582731  | [full]   | 2929  | No  | NA   | 0 | 2 | Not-determined | Genome-fragment | NA | 0    | 0    |
| S6-final-viral-combined_k141_1333971  | [full]   | 1882  | Yes | 1071 | 1 | 0 | Low-quality    | Genome-fragment | NA | 0.57 | 41.0 |
| 57-final-viral-combined_k141_147211   | [full]   | 1566  | No  | NA   | 0 | 1 | Not-determined | Genome-fragment | NA | 0    | 0    |
| 57-final-viral-combined_k141_755381   | [full]   | 1116  | No  | NA   | 0 | 1 | Not-determined | Genome-fragment | NA | 0    | 0    |
| S9_k141_62530                         |          | 1882  | No  | NA   | 0 | 1 | Low-quality    | Genome-fragment | NA | 0.17 | 0    |
| S5_k141_88886                         |          | 1883  | No  | NA   | 0 | 1 | Low-quality    | Genome-fragment | NA | 4.04 | 0    |
| 57-final-viral-combined_k141_1184241  | [full]   | 1883  | No  | NA   | 1 | 0 | Low-quality    | Genome-fragment | NA | 2.7  | 0    |
| 57-final-viral-combined_k141_147481   | [full]   | 1890  | No  | NA   | 0 | 0 | Not-determined | Genome-fragment | NA | 0    | 0    |
| 57-final-viral-combined_k141_363861   | [full]   | 3043  | No  | NA   | 0 | 2 | Not-determined | Genome-fragment | NA | 0    | 0    |
| S17-final-viral-combined_k141_1234131 | [full]   | 1883  | No  | NA   | 1 | 0 | Low-quality    | Genome-fragment | NA | 4.02 | 0    |
| S17_k141_16079                        |          | 1883  | No  | NA   | 0 | 0 | Low-quality    | Genome-fragment | NA | 3.42 | 0    |
| 57-final-viral-combined_k141_1787201  | [full]   | 4859  | No  | NA   | 0 | 4 | Not-determined | Genome-fragment | NA | 0    | 0    |
| S12-final-viral-combined_k141_3938531 | [full]   | 1883  | No  | NA   | 1 | 0 | Low-quality    | Genome-fragment | NA | 0.87 | 0    |
| 57-final-viral-combined_k141_147771   | [full]   | 1016  | No  | NA   | 0 | 0 | Not-determined | Genome-fragment | NA | 0.97 | 0    |
| S12_k141_60684                        |          | 1883  | No  | NA   | 0 | 2 | Low-quality    | Genome-fragment | NA | 0    | 0    |
| 57-final-viral-combined_k141_456441   | [full]   | 1204  | No  | NA   | 0 | 0 | Not-determined | Genome-fragment | NA | 0    | 0    |
| S2-final-viral-combined_k141_2476371  | [full]   | 1883  | No  | NA   | 2 | 0 | Low-quality    | Genome-fragment | NA | 4.42 | 0    |
| 57-final-viral-combined_k141_4565031  | [full]   | 6146  | No  | NA   | 0 | 3 | Not-determined | Genome-fragment | NA | 0    | 0    |
| S6-final-viral-combined_k141_1354341  | [full]   | 1883  | No  | NA   | 0 | 0 | Low-quality    | Genome-fragment | NA | 5.26 | 0    |
| S6-final-viral-combined_k141_993801   | [full]   | 1883  | No  | NA   | 0 | 0 | Low-quality    | Genome-fragment | NA | 1.74 | 0    |
| S9-final-viral-combined_k141_667531   | [full]   | 1884  | No  | NA   | 3 | 0 | Low-quality    | Genome-fragment | NA | 4.2  | 0    |
| 57-final-viral-combined_k141_1060681  | [full]   | 1846  | No  | NA   | 0 | 0 | Not-determined | Genome-fragment | NA | 0    | 0    |
| S11_k141_150825                       |          | 1884  | No  | NA   | 0 | 0 | Low-quality    | Genome-fragment | NA | 4.35 | 0    |
| S1-final-viral-combined_k141_2417311  | [full]   | 1884  | No  | NA   | 0 | 2 | Low-quality    | Genome-fragment | NA | 1.56 | 0    |
| 57-final-viral-combined_k141_1174211  | [full]   | 1407  | No  | NA   | 0 | 2 | Not-determined | Genome-fragment | NA | 0    | 0    |
| 57-final-viral-combined_k141_1276461  | [full]   | 12271 | No  | NA   | 0 | 2 | Not-determined | Genome-fragment | NA | 0    | 0    |
| 57-final-viral-combined_k141_46731    | [full]   | 3294  | No  | NA   | 0 | 0 | Not-determined | Genome-fragment | NA | 0    | 0    |
| 57-final-viral-combined_k141_1890901  | [full]   | 1893  | No  | NA   | 0 | 2 | Not-determined | Genome-fragment | NA | 0    | 0    |
| 57-final-viral-combined_k141_1373981  | [full]   | 3212  | No  | NA   | 0 | 2 | Not-determined | Genome-fragment | NA | 0    | 0    |
| 57-final-viral-combined_k141_1685961  | [full]   | 1582  | No  | NA   | 0 | 1 | Not-determined | Genome-fragment | NA | 0    | 0    |
| S5_k141_142401                        |          | 1884  | No  | NA   | 1 | 0 | Low-quality    | Genome-fragment | NA | 4.38 | 0    |
| S17-final-viral-combined_k141_1755161 | [full]   | 1884  | No  | NA   | 0 | 0 | Low-quality    | Genome-fragment | NA | 3.1  | 0    |
| 57-final-viral-combined_k141_1995351  | [full]   | 2159  | No  | NA   | 0 | 3 | Not-determined | Genome-fragment | NA | 0    | 0    |
| 57-final-viral-combined_k141_76951    | [full]   | 1141  | No  | NA   | 0 | 2 | Not-determined | Genome-fragment | NA | 0    | 0    |
| S12_k141_70083                        |          | 1884  | No  | NA   | 0 | 0 | Low-quality    | Genome-fragment | NA | 0.17 | 0    |
| 57-final-viral-combined_k141_757031   | [full]   | 1649  | No  | NA   | 0 | 0 | Not-determined | Genome-fragment | NA | 0    | 0    |
| 57-final-viral-combined_k141_2297671  | [full]   | 1909  | No  | NA   | 0 | 1 | Not-determined | Genome-fragment | NA | 0    | 0    |
| S4-final-viral-combined_k141_432321   | [full]   | 1884  | No  | NA   | 0 | 2 | Low-quality    | Genome-fragment | NA | 4.35 | 0    |
| 57-final-viral-combined_k141_1891101  | [full]   | 9955  | No  | NA   | 0 | 0 | Not-determined | Genome-fragment | NA | 0    | 0    |
| 57-final-viral-combined_k141_665231   | [full]   | 4369  | No  | NA   | 0 | 1 | Not-determined | Genome-fragment | NA | 0    | 0    |
| S8-final-viral-combined_k141_2305401  | [full]   | 1884  | No  | NA   | 0 | 0 | Low-quality    | Genome-fragment | NA | 3.88 | 0    |
| 57-final-viral-combined_k141_4769761  | [full]   | 26174 | No  | NA   | 0 | 2 | Not-determined | Genome-fragment | NA | 0    | 0    |
| S8-final-viral-combined_k141_2549251  | [full]   | 1884  | No  | NA   | 0 | 0 | Low-quality    | Genome-fragment | NA | 3.82 | 0    |
| 57-final-viral-combined_k141_457531   | [full]   | 2220  | No  | NA   | 0 | 2 | Not-determined | Genome-fragment | NA | 0    | 0    |
| 57-final-viral-combined_k141_1374141  | [full]   | 3151  | No  | NA   | 0 | 1 | Not-determined | Genome-fragment | NA | 0    | 0    |
| 57-final-viral-combined_k141_665671   | [full]   | 1312  | No  | NA   | 0 | 1 | Not-determined | Genome-fragment | NA | 2.59 | 0    |
| S11-final-viral-combined_k141_3276341 | [full]   | 1885  | No  | NA   | 0 | 1 | Low-quality    | Genome-fragment | NA | 2.59 | 0    |
| S11-final-viral-combined_k141_1373341 | [full]   | 1885  | No  | NA   | 0 | 0 | Low-quality    | Genome-fragment | NA | 3.4  | 0    |
| S1-final-viral-combined_k141_3392281  | [full]   | 1885  | No  | NA   | 1 | 0 | Low-quality    | Genome-fragment | NA | 1.11 | 0    |
| 57-final-viral-combined_k141_1474981  | [full]   | 2574  | No  | NA   | 0 | 1 | Not-determined | Genome-fragment | NA | 0    | 0    |
| 57-final-viral-combined_k141_148981   | [full]   | 4461  | No  | NA   | 0 | 0 | Not-determined | Genome-fragment | NA | 0    | 0    |
| 57-final-viral-combined_k141_1297981  | [full]   | 6288  | No  | NA   | 0 | 2 | Not-determined | Genome-fragment | NA | 0    | 0    |
| 57-final-viral-combined_k141_2297981  | [full]   | 1954  | No  | NA   | 0 | 2 | Not-determined | Genome-fragment | NA | 0    | 0    |
| S5-final-viral-combined_k141_205341   | [H2gene] | 1885  | No  | NA   | 2 | 0 | Low-quality    | Genome-fragment | NA | 5.03 | 0    |
| S17-final-viral-combined_k141_1740941 | [full]   | 1885  | No  | NA   | 0 | 1 | Low-quality    | Genome-fragment | NA | 0    | 0    |
| S12-final-viral-combined_k141_1693521 | [full]   | 1885  | No  | NA   | 0 | 0 | Low-quality    | Genome-fragment | NA | 3.35 | 0    |
| 57-final-viral-combined_k141_1277351  | [full]   | 1170  | No  | NA   | 0 | 0 | Not-determined | Genome-fragment | NA | 0    | 0    |
| 57-final-viral-combined_k141_242421   | [full]   | 2809  | No  | NA   | 0 | 2 | Not-determined | Genome-fragment | NA | 0    | 0    |
| 57-final-viral-combined_k141_964991   | [full]   | 2505  | No  | NA   | 0 | 2 | Not-determined | Genome-fragment | NA | 0    | 0    |
| 57-final-viral-combined_k141_1996501  | [full]   | 1521  | No  | NA   | 0 | 0 | Not-determined | Genome-fragment | NA | 0    | 0    |
| S12_k141_78212                        |          | 1885  | No  | NA   | 1 | 0 | Low-quality    | Genome-fragment | NA | 1.01 | 0    |
| 57-final-viral-combined_k141_965001   | [full]   | 3844  | No  | NA   | 0 | 1 | Not-determined | Genome-fragment | NA | 0    | 0    |
| S3-final-viral-combined_k141_779921   | [full]   | 1886  | No  | NA   | 0 | 0 | Low-quality    | Genome-fragment | NA | 4.4  | 0    |
| 57-final-viral-combined_k141_965031   | [full]   | 1018  | No  | NA   | 0 | 1 | Not-determined | Genome-fragment | NA | 0    | 0    |
| 57-final-viral-combined_k141_1183911  | [full]   | 1040  | No  | NA   | 0 | 2 | Not-determined | Genome-fragment | NA | 0    | 0    |
| 57-final-viral-combined_k141_1283941  | [full]   | 5302  | No  | NA   | 0 | 2 | Not-determined | Genome-fragment | NA | 0    | 0    |
| 57-final-viral-combined_k141_1519511  | [full]   | 1886  | No  | NA   | 2 | 0 | Low-quality    | Genome-fragment | NA | 4.87 | 0    |
| S17_k141_57926                        |          | 1886  | No  | NA   | 0 | 1 | Low-quality    | Genome-fragment | NA | 0.58 | 0    |
| 57-final-viral-combined_k141_1375121  | [full]   | 4468  | No  | NA   | 0 | 0 | Not-determined | Genome-fragment | NA | 0    | 0    |
| S17_k141_239564                       |          | 1886  | No  | NA   | 0 | 1 | Low-quality    | Genome-fragment | NA | 0.9  | 0    |
| 57-final-viral-combined_k141_1996701  | [full]   | 5281  | No  | NA   | 0 | 5 | Not-determined | Genome-fragment | NA | 0    | 0    |
| S17_k141_239669                       |          | 1886  | No  | NA   | 0 | 1 | Low-quality    | Genome-fragment | NA | 0.67 | 0    |
| S2-final-viral-combined_k141_907771   | [full]   | 1886  | No  | NA   | 2 | 0 | Low-quality    | Genome-fragment | NA | 3.72 | 0    |
| 57-final-viral-combined_k141_1170051  | [full]   | 5343  | No  | NA   | 0 | 3 | Not-determined | Genome-fragment | NA | 0    | 0    |



|                                      |          |        |     |       |    |              |                 |                 |       |       |
|--------------------------------------|----------|--------|-----|-------|----|--------------|-----------------|-----------------|-------|-------|
| 57-final-viral-combined_k141_218595  | [full]   | 1450   | No  | NA    | 0  | 2            | Not-determined  | Genome-fragment | NA    | 0     |
| 57-final-viral-combined_k141_66888   | [full]   | 2065   | No  | NA    | 0  | 0            | Not-determined  | Genome-fragment | NA    | 0     |
| 57-final-viral-combined_k141_106863  | [full]   | 2283   | No  | NA    | 0  | 0            | Not-determined  | Genome-fragment | NA    | 0     |
| 57-final-viral-combined_k141_140950  | [full]   | 1892   | No  | NA    | 0  | 1            | Low-quality     | Genome-fragment | 1.73  | 0     |
| 511-final-viral-combined_k141_238203 | [full]   | 1893   | No  | NA    | 1  | 0            | Low-quality     | Genome-fragment | 3.86  | 0     |
| 51-final-viral-combined_k141_292711  | [full]   | 1893   | No  | NA    | 0  | 1            | Low-quality     | Genome-fragment | 3.84  | 0     |
| 57-final-viral-combined_k141_5089    | [full]   | 1273   | No  | NA    | 0  | 0            | Not-determined  | Genome-fragment | NA    | 0     |
| 57-final-viral-combined_k141_199570  | [full]   | 1906   | No  | NA    | 0  | 1            | Not-determined  | Genome-fragment | NA    | 0     |
| 57-final-viral-combined_k141_15272   | [full]   | 4558   | No  | NA    | 0  | 2            | Not-determined  | Genome-fragment | NA    | 0     |
| 57-final-viral-combined_k141_86473   | [full]   | 1214   | No  | NA    | 0  | 0            | Not-determined  | Genome-fragment | NA    | 0     |
| 57-final-viral-combined_k141_56204   | [full]   | 2017   | No  | NA    | 0  | 0            | Not-determined  | Genome-fragment | NA    | 0     |
| 57-final-viral-combined_k141_45970   | [full]   | 2011   | No  | NA    | 0  | 1            | Not-determined  | Genome-fragment | NA    | 0     |
| 57-final-viral-combined_k141_86487   | [full]   | 1127   | No  | NA    | 0  | 1            | Not-determined  | Genome-fragment | NA    | 0     |
| 57-final-viral-combined_k141_137807  | [full]   | 3361   | No  | NA    | 0  | 1            | Not-determined  | Genome-fragment | NA    | 0     |
| 57-final-viral-combined_k141_56210   | [full]   | 2436   | No  | NA    | 0  | 2            | Not-determined  | Genome-fragment | NA    | 0     |
| 51_k141_261501                       |          | 1893   | No  | NA    | 0  | 0            | Low-quality     | Genome-fragment | 4.13  | 0     |
| 57-final-viral-combined_k141_96886   | [full]   | 1659   | No  | NA    | 0  | 2            | Not-determined  | Genome-fragment | NA    | 0     |
| 57-final-viral-combined_k141_66915   | [full]   | 1789   | No  | NA    | 0  | 2            | Not-determined  | Genome-fragment | NA    | 0     |
| 57-final-viral-combined_k141_66915   | [full]   | 6209   | No  | NA    | 0  | 4            | Not-determined  | Genome-fragment | NA    | 0     |
| 53-final-viral-combined_k141_68706   | [full]   | 1893   | No  | NA    | 0  | 4            | Low-quality     | Genome-fragment | 0.66  | 0     |
| 57-final-viral-combined_k141_741511  | [full]   | 1893   | No  | NA    | 1  | 0            | Low-quality     | Genome-fragment | 2.47  | 0     |
| 57-final-viral-combined_k141_189590  | [full]   | 1895   | No  | NA    | 0  | 0            | Not-determined  | Genome-fragment | NA    | 0     |
| 517-final-viral-combined_k141_201395 | [full]   | 1893   | No  | NA    | 1  | 0            | Low-quality     | Genome-fragment | 2.78  | 0     |
| 512-final-viral-combined_k141_48738  | [full]   | 1893   | No  | NA    | 0  | 0            | Low-quality     | Genome-fragment | 4.75  | 0     |
| 56-final-viral-combined_k141_24427   | [full]   | 1893   | No  | NA    | 0  | 0            | Low-quality     | Genome-fragment | 3.66  | 0     |
| 57-final-viral-combined_k141_118645  | [full]   | 18970  | No  | NA    | 0  | 7            | Not-determined  | Genome-fragment | NA    | 0     |
| 58-final-viral-combined_k141_275523  | [full]   | 1893   | No  | NA    | 0  | 0            | Low-quality     | Genome-fragment | 2.28  | 0     |
| 57-final-viral-combined_k141_12790   | [full]   | 3414   | No  | NA    | 0  | 0            | Not-determined  | Genome-fragment | NA    | 0     |
| 57-final-viral-combined_k141_36096   | [full]   | 1758   | No  | NA    | 0  | 0            | Not-determined  | Genome-fragment | NA    | 0     |
| 57-final-viral-combined_k141_46006   | [full]   | 3181   | No  | NA    | 0  | 2            | Not-determined  | Genome-fragment | NA    | 0     |
| 57-final-viral-combined_k141_179124  | [full]   | 1105   | No  | NA    | 0  | 2            | Not-determined  | Genome-fragment | NA    | 0     |
| 511-final-viral-combined_k141_3089   | [full]   | 1894   | No  | NA    | 1  | 1            | Low-quality     | Genome-fragment | 1.27  | 0     |
| 511-final-viral-combined_k141_33172  | [full]   | 1894   | No  | NA    | 2  | 0            | Low-quality     | Genome-fragment | 5.13  | 0     |
| 57-final-viral-combined_k141_128032  | [full]   | 1195   | No  | NA    | 0  | 1            | Not-determined  | Genome-fragment | NA    | 0     |
| 57-final-viral-combined_k141_14772   | [full]   | 1735   | No  | NA    | 0  | 0            | Not-determined  | Genome-fragment | NA    | 0     |
| 53_k141_74862                        |          | 1894   | No  | NA    | 1  | 0            | Low-quality     | Genome-fragment | 1.23  | 0     |
| 512-final-viral-combined_k141_215297 | [full]   | 1894   | No  | NA    | 2  | 0            | Low-quality     | Genome-fragment | 4.21  | 0     |
| 57-final-viral-combined_k141_11790   | [full]   | 2551   | No  | NA    | 0  | 2            | Not-determined  | Genome-fragment | NA    | 0     |
| 512-final-viral-combined_k141_20891  | [H2gene] | 1894   | No  | NA    | 2  | 0            | Low-quality     | Genome-fragment | 4.32  | 0     |
| 52-final-viral-combined_k141_60773   | [full]   | 1894   | No  | NA    | 2  | 1            | Low-quality     | Genome-fragment | 2.42  | 0     |
| 57-final-viral-combined_k141_200043  | [full]   | 1607   | No  | NA    | 0  | 0            | Not-determined  | Genome-fragment | NA    | 0     |
| 57-final-viral-combined_k141_118167  | [full]   | 4212   | No  | NA    | 0  | 0            | Not-determined  | Genome-fragment | NA    | 0     |
| 57-final-viral-combined_k141_200550  | [full]   | 2253   | No  | NA    | 0  | 0            | Not-determined  | Genome-fragment | NA    | 0     |
| 57-final-viral-combined_k141_6697    | [full]   | 2868   | No  | NA    | 0  | 2            | Not-determined  | Genome-fragment | NA    | 0     |
| 54-final-viral-combined_k141_14238   | [full]   | 1894   | No  | NA    | 0  | 0            | Low-quality     | Genome-fragment | 3.2   | 0     |
| 57-final-viral-combined_k141_137858  | [full]   | 50877  | Yes | 27506 | 3  | 21           | Medium-quality  | Genome-fragment | 67.28 | 45.94 |
| 511-final-viral-combined_k141_219192 | [full]   | 1895   | No  | NA    | 1  | 0            | Low-quality     | Genome-fragment | 1.66  | 0     |
| 57-final-viral-combined_k141_147822  | [full]   | 2700   | No  | NA    | 0  | 0            | Not-determined  | Genome-fragment | NA    | 0     |
| 57-final-viral-combined_k141_24795   | [full]   | 6509   | No  | NA    | 0  | 0            | Not-determined  | Genome-fragment | NA    | 0     |
| 51-final-viral-combined_k141_265954  | [H2gene] | 1895   | No  | NA    | 1  | 0            | Low-quality     | Genome-fragment | 5.03  | 0     |
| 57-final-viral-combined_k141_76248   | [full]   | 2925   | No  | NA    | 0  | 3            | Not-determined  | Genome-fragment | NA    | 0     |
| 57-final-viral-combined_k141_96940   | [full]   | 3818   | No  | NA    | 0  | 2            | Not-determined  | Genome-fragment | NA    | 0     |
| 51_k141_263329                       |          | 1895   | No  | NA    | 0  | 0            | Low-quality     | Genome-fragment | 5.74  | 0     |
| 517-final-viral-combined_k141_192227 | [full]   | 1895   | No  | NA    | 0  | 1            | Low-quality     | Genome-fragment | 1.45  | 0     |
| 56_k141_51238                        |          | 1895   | No  | NA    | 0  | 0            | Low-quality     | Genome-fragment | 1.23  | 0     |
| 59_k141_89059                        |          | 1896   | No  | NA    | 0  | 0            | Low-quality     | Genome-fragment | 1.23  | 0     |
| 57-final-viral-combined_k141_86699   | [full]   | 2112   | No  | NA    | 0  | 2            | Not-determined  | Genome-fragment | NA    | 0     |
| 57-final-viral-combined_k141_147939  | [full]   | 1551   | No  | NA    | 0  | 2            | Not-determined  | Genome-fragment | NA    | 0     |
| 51_k141_336515                       |          | 1896   | No  | NA    | 0  | 2            | Low-quality     | Genome-fragment | 1.12  | 0     |
| 57-final-viral-combined_k141_118185  | [full]   | 1308   | No  | NA    | 0  | 0            | Not-determined  | Genome-fragment | NA    | 0     |
| 57-final-viral-combined_k141_15382   | [full]   | 8138   | No  | NA    | 0  | 5            | Not-determined  | Genome-fragment | NA    | 0     |
| 57-final-viral-combined_k141_179396  | [full]   | 8242   | No  | NA    | 0  | 3            | Not-determined  | Genome-fragment | NA    | 0     |
| 57-final-viral-combined_k141_179297  | [full]   | 1731   | No  | NA    | 0  | 1            | Not-determined  | Genome-fragment | NA    | 0     |
| 57-final-viral-combined_k141_4837    | [full]   | 8249   | No  | NA    | 0  | 6            | Not-determined  | Genome-fragment | NA    | 0     |
| 57-final-viral-combined_k141_189622  | [full]   | 1575   | No  | NA    | 0  | 1            | Not-determined  | Genome-fragment | NA    | 0     |
| 55_k141_48913                        |          | 1896   | No  | NA    | 0  | 1            | Low-quality     | Genome-fragment | 0.77  | 0     |
| 517-final-viral-combined_k141_120731 | [full]   | 1896   | No  | NA    | 1  | 0            | Low-quality     | Genome-fragment | 1.84  | 0     |
| 512-final-viral-combined_k141_239601 | [full]   | 1896   | No  | NA    | 0  | 0            | Low-quality     | Genome-fragment | 3.84  | 0     |
| 54-final-viral-combined_k141_148607  | [full]   | 1896   | No  | NA    | 0  | 0            | Low-quality     | Genome-fragment | NA    | 0     |
| 56-final-viral-combined_k141_121398  | [full]   | 1896   | No  | NA    | 0  | 2            | Low-quality     | Genome-fragment | 2.58  | 0     |
| 57-final-viral-combined_k141_77081   | [full]   | 1396   | No  | NA    | 0  | 2            | Not-determined  | Genome-fragment | NA    | 0     |
| 57-final-viral-combined_k141_76434   | [full]   | 6449   | No  | NA    | 0  | 6            | Not-determined  | Genome-fragment | NA    | 0     |
| 59-final-viral-combined_k141_62542   | [full]   | 1897   | No  | NA    | 0  | 2            | Low-quality     | Genome-fragment | 2.91  | 0     |
| 51_k141_309963                       |          | 1897   | No  | NA    | 0  | 0            | Low-quality     | Genome-fragment | 1.94  | 0     |
| 55-final-viral-combined_k141_14966   | [H2gene] | 1897   | No  | NA    | 1  | 0            | Low-quality     | Genome-fragment | 1.17  | 0     |
| 57-final-viral-combined_k141_36346   | [full]   | 6311   | No  | NA    | 0  | 1            | Not-determined  | Genome-fragment | NA    | 0     |
| 57-final-viral-combined_k141_169329  | [full]   | 3586   | No  | NA    | 0  | 0            | Not-determined  | Genome-fragment | NA    | 0     |
| 57-final-viral-combined_k141_148058  | [full]   | 1065   | No  | NA    | 0  | 1            | Not-determined  | Genome-fragment | NA    | 0     |
| 57-final-viral-combined_k141_107239  | [full]   | 3317   | No  | NA    | 0  | 2            | Not-determined  | Genome-fragment | NA    | 0     |
| 57-final-viral-combined_k141_97123   | [full]   | 3827   | No  | NA    | 0  | 4            | Not-determined  | Genome-fragment | NA    | 0     |
| 57-final-viral-combined_k141_158879  | [full]   | 1019   | No  | NA    | 0  | 0            | Not-determined  | Genome-fragment | NA    | 0     |
| 57-final-viral-combined_k141_169360  | [full]   | 2572   | No  | NA    | 0  | 1            | Not-determined  | Genome-fragment | NA    | 0     |
| 57-final-viral-combined_k141_118223  | [full]   | 2560   | No  | NA    | 0  | 0            | Not-determined  | Genome-fragment | NA    | 0     |
| 517-final-viral-combined_k141_115953 | [full]   | 1897   | No  | NA    | 0  | 0            | Low-quality     | Genome-fragment | 3.11  | 0     |
| 57-final-viral-combined_k141_148047  | [full]   | 2040   | No  | NA    | 0  | 2            | Not-determined  | Genome-fragment | NA    | 0     |
| 57-final-viral-combined_k141_46302   | [full]   | 3922   | No  | NA    | 0  | 4            | Not-determined  | Genome-fragment | NA    | 0     |
| 517-final-viral-combined_k141_213123 | [full]   | 1897   | No  | NA    | 0  | 0            | Low-quality     | Genome-fragment | 0.58  | 0     |
| 512-final-viral-combined_k141_255987 | [full]   | 1897   | No  | NA    | 0  | 2            | Low-quality     | Genome-fragment | 2.74  | 0     |
| 512_k141_68665                       |          | 1897   | No  | NA    | 0  | 1            | Low-quality     | Genome-fragment | 3.09  | 0     |
| 57-final-viral-combined_k141_36424   | [full]   | 3077   | No  | NA    | 0  | 2            | Not-determined  | Genome-fragment | NA    | 0     |
| 57-final-viral-combined_k141_210309  | [full]   | 1934   | No  | NA    | 0  | 1            | Not-determined  | Genome-fragment | NA    | 0     |
| 54-final-viral-combined_k141_164866  | [full]   | 1897   | No  | NA    | 0  | 1            | Low-quality     | Genome-fragment | 3.16  | 0     |
| 57-final-viral-combined_k141_46343   | [full]   | 1696   | No  | NA    | 0  | 0            | Not-determined  | Genome-fragment | NA    | 0     |
| 57-final-viral-combined_k141_56462   | [full]   | 2534   | No  | NA    | 0  | 3            | Not-determined  | Genome-fragment | NA    | 0     |
| 57-final-viral-combined_k141_97214   | [full]   | 2842   | No  | NA    | 0  | 0            | Not-determined  | Genome-fragment | NA    | 0     |
| 58-final-viral-combined_k141_116867  | [H2gene] | 1897   | No  | NA    | 1  | 0            | Low-quality     | Genome-fragment | 1.31  | 0     |
| 57-final-viral-combined_k141_15599   | [full]   | 1635   | No  | NA    | 0  | 1            | Not-determined  | Genome-fragment | NA    | 0     |
| 57-final-viral-combined_k141_210323  | [full]   | 3508   | No  | NA    | 0  | 1            | Not-determined  | Genome-fragment | NA    | 0     |
| 59-final-viral-combined_k141_100031  | [full]   | 1898   | No  | NA    | 0  | 1            | Low-quality     | Genome-fragment | 0.92  | 0     |
| 511-final-viral-combined_k141_82907  | [full]   | 1898   | No  | NA    | 0  | 0            | Low-quality     | Genome-fragment | 3.02  | 0     |
| 55-final-viral-combined_k141_125933  | [H2gene] | 1898   | No  | NA    | 2  | 0            | Low-quality     | Genome-fragment | 4.79  | 0     |
| 55_k141_82453                        |          | 1898   | No  | NA    | 1  | 0            | Low-quality     | Genome-fragment | 3.43  | 0     |
| 57-final-viral-combined_k141_46412   | [full]   | 2463   | No  | NA    | 0  | 1            | Not-determined  | Genome-fragment | NA    | 0     |
| 57-final-viral-combined_k141_138150  | [full]   | 1467   | No  | NA    | 0  | 0            | Not-determined  | Genome-fragment | NA    | 0     |
| 57-final-viral-combined_k141_237359  | [full]   | 1898   | No  | NA    | 0  | 0            | Low-quality     | Genome-fragment | NA    | 0     |
| 57-final-viral-combined_k141_230337  | [full]   | 1088   | No  | NA    | 0  | 1            | Not-determined  | Genome-fragment | NA    | 0     |
| 57-final-viral-combined_k141_138156  | [full]   | 1057   | No  | NA    | 0  | 2            | Not-determined  | Genome-fragment | NA    | 0     |
| 57-final-viral-combined_k141_191538  | [full]   | 1898   | No  | NA    | 0  | 1            | Low-quality     | Genome-fragment | 1.34  | 0     |
| 57-final-viral-combined_k141_240748  | [full]   | 4222   | No  | NA    | 0  | 0            | Not-determined  | Genome-fragment | NA    | 0     |
| 517-final-viral-combined_k141_77104  | [full]   | 1898   | No  | NA    | 0  | 2            | Low-quality     | Genome-fragment | 1.12  | 0     |
| 57-final-viral-combined_k141_107793  | [full]   | 3828   | No  | NA    | 0  | 1            | Not-determined  | Genome-fragment | NA    | 0     |
| 512-final-viral-combined_k141_355888 | [full]   | 1898   | No  | NA    | 0  | 0            | Low-quality     | Genome-fragment | 3.65  | 0     |
| 512-final-viral-combined_k141_393712 | [full]   | 1898   | No  | NA    | 0  | 0            | Low-quality     | Genome-fragment | 1.58  | 0     |
| 57-final-viral-combined_k141_46454   | [full]   | 1146   | No  | NA    | 0  | 0            | Not-determined  | Genome-fragment | NA    | 0     |
| 57-final-viral-combined_k141_169275  | [full]   | 130069 | No  | NA    | 45 | High-quality | Genome-fragment | NA              | 96.12 | 0     |
| 57-final-viral-combined_k141_86846   | [full]   | 2194   | No  | NA    | 0  | 2            | Not-determined  | Genome-fragment | NA    | 0     |
| 57-final-viral-combined_k141_148215  | [full]   | 2487   | No  | NA    | 0  | 0            | Not-determined  | Genome-fragment | NA    | 0     |
| 57-final-viral-combined_k141_18274   | [full]   | 1525   | No  | NA    | 0  | 0            | Not-determined  | Genome-fragment | NA    | 0     |
| 512-final-viral-combined_k141_211781 | [H2gene] | 1898   | No  | NA    | 1  | 0            | Low-quality     | Genome-fragment | 5.66  | 0     |
| 58-final-viral-combined_k141_176854  | [full]   | 1898   | No  | NA    | 1  | 0            | Low-quality     | Genome-fragment | 4.04  | 0     |
| 511-final-viral-combined_k141_29762  | [full]   | 1899   | No  | NA    | 1  | 0            | Low-quality     | Genome-fragment | 4.01  | 0     |
| 57-final-viral-combined_k141_36605   | [full]   | 2240   | No  | NA    | 0  | 0            | Not-determined  | Genome-fragment | NA    | 0     |
| 57-final-viral-combined_k141_189883  | [full]   | 17038  | No  | NA    | 0  | 5            | Not-determined  | Genome-fragment | NA    | 0     |
| 511-final-viral-combined_k141_38405  | [full]   | 1899   | No  | NA    | 0  | 1            | Low-quality     | Genome-fragment | 1.34  | 0     |
| 57-final-viral-combined_k141_15746   | [full]   | 3342   | No  | NA    | 0  | 2            | Not-determined  | Genome-fragment | NA    | 0     |
| 51_k141_391283                       |          | 1899   | No  | NA    | 0  | 0            | Low-quality     | Genome-fragment | 3.55  | 0     |
| 57-final-viral-combined_k141_170218  | [full]   | 1899   | No  | NA    | 2  | 0            | Low-quality     | Genome-fragment | 4.96  | 0     |
| 517-final-viral-combined_k141_24897  | [H2gene] | 1899   | No  | NA    | 0  | 0            | Low-quality     | Genome-fragment | 4.55  | 0     |
| 57-final-viral-combined_k141_138254  | [full]   | 2997   | No  | NA    | 0  |              |                 |                 |       |       |



|                                               |       |     |       |    |    |                |                 |       |       |
|-----------------------------------------------|-------|-----|-------|----|----|----------------|-----------------|-------|-------|
| 517-final-viral-combined_k141_162160 [H2gene] | 1901  | No  | NA    | 0  | 0  | Low-quality    | Genome-fragment | 3.43  | 0     |
| 57-final-viral-combined_k141_167180 [full]    | 2017  | No  | NA    | 0  | 1  | Not-determined | Genome-fragment | NA    | 0     |
| 57-final-viral-combined_k141_200700 [full]    | 2616  | No  | NA    | 0  | 1  | Not-determined | Genome-fragment | NA    | 0     |
| 57-final-viral-combined_k141_128506 [full]    | 1192  | No  | NA    | 0  | 1  | Not-determined | Genome-fragment | NA    | 0     |
| 52_k141_197410                                | 1901  | No  | NA    | 0  | 1  | Low-quality    | Genome-fragment | 0.16  | 0     |
| 57-final-viral-combined_k141_25200 [full]     | 1976  | No  | NA    | 0  | 0  | Not-determined | Genome-fragment | NA    | 0     |
| 57-final-viral-combined_k141_56810 [full]     | 3356  | No  | NA    | 0  | 1  | Not-determined | Genome-fragment | NA    | 0     |
| 57-final-viral-combined_k141_128526 [full]    | 1307  | No  | NA    | 0  | 0  | Not-determined | Genome-fragment | NA    | 0     |
| 511-final-viral-combined_k141_308531 [full]   | 1902  | No  | NA    | 0  | 0  | Low-quality    | Genome-fragment | 3.74  | 0     |
| 57-final-viral-combined_k141_25213 [full]     | 2067  | No  | NA    | 0  | 1  | Not-determined | Genome-fragment | NA    | 0     |
| 51-final-viral-combined_k141_41859 [H2gene]   | 1902  | No  | NA    | 1  | 0  | Low-quality    | Genome-fragment | 3.96  | 0     |
| 57-final-viral-combined_k141_190216 [full]    | 2106  | No  | NA    | 0  | 2  | Not-determined | Genome-fragment | NA    | 0     |
| 517-final-viral-combined_k141_104405 [full]   | 1902  | No  | NA    | 0  | 1  | Low-quality    | Genome-fragment | 0.84  | 0     |
| 57-final-viral-combined_k141_190235 [full]    | 5851  | No  | NA    | 0  | 1  | Not-determined | Genome-fragment | NA    | 0     |
| 57-final-viral-combined_k141_241070 [full]    | 6680  | No  | NA    | 0  | 3  | Not-determined | Genome-fragment | NA    | 0     |
| 57-final-viral-combined_k141_138469 [full]    | 2481  | No  | NA    | 0  | 2  | Not-determined | Genome-fragment | NA    | 0     |
| 57-final-viral-combined_k141_25257 [full]     | 5200  | No  | NA    | 0  | 2  | Not-determined | Genome-fragment | NA    | 0     |
| 517-final-viral-combined_k141_106588 [full]   | 1902  | No  | NA    | 0  | 1  | Low-quality    | Genome-fragment | 3.64  | 0     |
| 57-final-viral-combined_k141_67506 [full]     | 2385  | No  | NA    | 0  | 0  | Not-determined | Genome-fragment | NA    | 0     |
| 57-final-viral-combined_k141_241114 [full]    | 2030  | No  | NA    | 0  | 0  | Not-determined | Genome-fragment | NA    | 0     |
| 57-final-viral-combined_k141_169747 [full]    | 1823  | No  | NA    | 0  | 0  | Not-determined | Genome-fragment | NA    | 0     |
| 517-final-viral-combined_k141_55021 [full]    | 1902  | No  | NA    | 0  | 3  | Low-quality    | Genome-fragment | 0.72  | 0     |
| 57-final-viral-combined_k141_159358 [full]    | 1694  | No  | NA    | 0  | 1  | Not-determined | Genome-fragment | NA    | 0     |
| 57-final-viral-combined_k141_67529 [full]     | 1181  | No  | NA    | 0  | 0  | Not-determined | Genome-fragment | NA    | 0     |
| 517-final-viral-combined_k141_265501 [full]   | 1902  | No  | NA    | 3  | 0  | Low-quality    | Genome-fragment | 3.73  | 0     |
| 57-final-viral-combined_k141_241130 [full]    | 1456  | No  | NA    | 0  | 1  | Not-determined | Genome-fragment | NA    | 0     |
| 56-final-viral-combined_k141_139569 [full]    | 1902  | No  | NA    | 0  | 1  | Low-quality    | Genome-fragment | 2.95  | 0     |
| 58-final-viral-combined_k141_88442 [full]     | 1902  | No  | NA    | 0  | 1  | Low-quality    | Genome-fragment | 0.9   | 0     |
| 57-final-viral-combined_k141_76831 [full]     | 1566  | No  | NA    | 0  | 1  | Not-determined | Genome-fragment | NA    | 0     |
| 57-final-viral-combined_k141_118620 [full]    | 3777  | No  | NA    | 0  | 0  | Not-determined | Genome-fragment | NA    | 0     |
| 57-final-viral-combined_k141_138543 [full]    | 1207  | No  | NA    | 0  | 0  | Not-determined | Genome-fragment | NA    | 0     |
| 58-final-viral-combined_k141_137259 [full]    | 1902  | No  | NA    | 0  | 0  | Low-quality    | Genome-fragment | 4.52  | 0     |
| 511-final-viral-combined_k141_322012 [full]   | 1903  | No  | NA    | 0  | 1  | Low-quality    | Genome-fragment | 0.86  | 0     |
| 57-final-viral-combined_k141_138558 [full]    | 1674  | No  | NA    | 0  | 0  | Not-determined | Genome-fragment | NA    | 0     |
| 511-final-viral-combined_k141_129211 [H2gene] | 1903  | No  | NA    | 1  | 0  | Low-quality    | Genome-fragment | 3.52  | 0     |
| 57-final-viral-combined_k141_16021 [full]     | 4210  | No  | NA    | 0  | 2  | Not-determined | Genome-fragment | NA    | 0     |
| 51_k141_337576                                | 1903  | No  | NA    | 0  | 1  | Low-quality    | Genome-fragment | 0.77  | 0     |
| 57-final-viral-combined_k141_56910 [full]     | 1072  | No  | NA    | 0  | 2  | Not-determined | Genome-fragment | NA    | 0     |
| 57-final-viral-combined_k141_179879 [full]    | 2885  | No  | NA    | 0  | 4  | Not-determined | Genome-fragment | NA    | 0     |
| 53_k141_128347                                | 1903  | No  | NA    | 0  | 0  | Low-quality    | Genome-fragment | 3.31  | 0     |
| 55-final-viral-combined_k141_179852 [full]    | 1903  | No  | NA    | 0  | 0  | Low-quality    | Genome-fragment | 3.13  | 0     |
| 57-final-viral-combined_k141_241159 [full]    | 1287  | No  | NA    | 0  | 1  | Not-determined | Genome-fragment | NA    | 0     |
| 55-final-viral-combined_k141_176409 [full]    | 1903  | No  | NA    | 1  | 0  | Low-quality    | Genome-fragment | 5.76  | 0     |
| 57-final-viral-combined_k141_4592 [full]      | 1903  | No  | NA    | 0  | 0  | Low-quality    | Genome-fragment | 3.31  | 0     |
| 512-final-viral-combined_k141_263969 [full]   | 1903  | No  | NA    | 0  | 2  | Low-quality    | Genome-fragment | 2.59  | 0     |
| 52-final-viral-combined_k141_156165 [full]    | 1603  | No  | NA    | 0  | 2  | Low-quality    | Genome-fragment | 4.89  | 0     |
| 57-final-viral-combined_k141_67658 [full]     | 6607  | No  | NA    | 0  | 5  | Not-determined | Genome-fragment | NA    | 0     |
| 57-final-viral-combined_k141_219369 [full]    | 1405  | No  | NA    | 0  | 2  | Not-determined | Genome-fragment | NA    | 0     |
| 57-final-viral-combined_k141_241242 [full]    | 2514  | No  | NA    | 0  | 2  | Not-determined | Genome-fragment | NA    | 0     |
| 58_k141_261092                                | 1903  | No  | NA    | 0  | 1  | Low-quality    | Genome-fragment | 2.29  | 0     |
| 511-final-viral-combined_k141_317546 [full]   | 1904  | No  | NA    | 0  | 1  | Low-quality    | Genome-fragment | 1.56  | 0     |
| 57-final-viral-combined_k141_190281 [full]    | 6304  | Yes | 23724 | 20 | 14 | High-quality   | Genome-fragment | 97.16 | 46.52 |
| 57-final-viral-combined_k141_210860 [full]    | 2952  | No  | NA    | 0  | 3  | Not-determined | Genome-fragment | NA    | 0     |
| 57-final-viral-combined_k141_169966 [full]    | 5788  | No  | NA    | 0  | 4  | Not-determined | Genome-fragment | NA    | 0     |
| 57-final-viral-combined_k141_76886 [full]     | 3389  | No  | NA    | 0  | 0  | Not-determined | Genome-fragment | NA    | 0     |
| 57-final-viral-combined_k141_118741 [full]    | 1156  | No  | NA    | 0  | 0  | Not-determined | Genome-fragment | NA    | 0     |
| 511-final-viral-combined_k141_156259 [full]   | 1904  | No  | NA    | 1  | 0  | Low-quality    | Genome-fragment | 4.11  | 0     |
| 51-final-viral-combined_k141_116551 [full]    | 1904  | No  | NA    | 2  | 0  | Low-quality    | Genome-fragment | 1.57  | 0     |
| 57-final-viral-combined_k141_76896 [full]     | 3679  | No  | NA    | 0  | 3  | Not-determined | Genome-fragment | NA    | 0     |
| 57-final-viral-combined_k141_219269 [full]    | 2309  | No  | NA    | 0  | 1  | Not-determined | Genome-fragment | NA    | 0     |
| 51-final-viral-combined_k141_31971 [full]     | 1904  | No  | NA    | 1  | 0  | Low-quality    | Genome-fragment | 3.2   | 0     |
| 57-final-viral-combined_k141_190238 [full]    | 1194  | No  | NA    | 0  | 0  | Not-determined | Genome-fragment | NA    | 0     |
| 57-final-viral-combined_k141_97766 [full]     | 1716  | No  | NA    | 0  | 0  | Not-determined | Genome-fragment | NA    | 0     |
| 57-final-viral-combined_k141_230782 [full]    | 2905  | No  | NA    | 0  | 3  | Not-determined | Genome-fragment | NA    | 0     |
| 51-final-viral-combined_k141_155398 [full]    | 1904  | No  | NA    | 0  | 0  | Low-quality    | Genome-fragment | 4.22  | 0     |
| 57-final-viral-combined_k141_97784 [full]     | 2189  | No  | NA    | 0  | 2  | Not-determined | Genome-fragment | NA    | 0     |
| 57-final-viral-combined_k141_210973 [full]    | 2178  | No  | NA    | 0  | 0  | Not-determined | Genome-fragment | NA    | 0     |
| 55-final-viral-combined_k141_115971 [full]    | 1904  | No  | NA    | 1  | 0  | Low-quality    | Genome-fragment | 3.28  | 0     |
| 55-final-viral-combined_k141_106521 [full]    | 1904  | No  | NA    | 0  | 1  | Low-quality    | Genome-fragment | 4.17  | 0     |
| 57-final-viral-combined_k141_134351 [full]    | 1904  | No  | NA    | 0  | 0  | Low-quality    | Genome-fragment | 3.23  | 0     |
| 517-final-viral-combined_k141_255751 [full]   | 1904  | No  | NA    | 2  | 0  | Low-quality    | Genome-fragment | 3.45  | 0     |
| 57-final-viral-combined_k141_76994 [full]     | 1107  | No  | NA    | 0  | 0  | Not-determined | Genome-fragment | NA    | 0     |
| 57-final-viral-combined_k141_151026 [full]    | 1904  | No  | NA    | 0  | 1  | Low-quality    | Genome-fragment | 1.41  | 0     |
| 517-final-viral-combined_k141_28249 [full]    | 1904  | No  | NA    | 0  | 1  | Low-quality    | Genome-fragment | 2.59  | 0     |
| 57-final-viral-combined_k141_118827 [full]    | 3354  | No  | NA    | 0  | 2  | Not-determined | Genome-fragment | NA    | 0     |
| 512-final-viral-combined_k141_169281 [full]   | 1904  | No  | NA    | 0  | 1  | Low-quality    | Genome-fragment | 1.11  | 0     |
| 57-final-viral-combined_k141_97820 [full]     | 1215  | No  | NA    | 0  | 0  | Not-determined | Genome-fragment | NA    | 0     |
| 57-final-viral-combined_k141_128910 [full]    | 1287  | No  | NA    | 0  | 1  | Not-determined | Genome-fragment | NA    | 0     |
| 512-final-viral-combined_k141_38068 [full]    | 1904  | No  | NA    | 0  | 1  | Low-quality    | Genome-fragment | 0.16  | 0     |
| 57-final-viral-combined_k141_159762 [full]    | 1581  | No  | NA    | 0  | 0  | Not-determined | Genome-fragment | NA    | 0     |
| 57-final-viral-combined_k141_87473 [full]     | 2868  | No  | NA    | 0  | 1  | Not-determined | Genome-fragment | NA    | 0     |
| 57-final-viral-combined_k141_180037 [full]    | 1766  | No  | NA    | 0  | 1  | Not-determined | Genome-fragment | NA    | 0     |
| 57-final-viral-combined_k141_46983 [full]     | 28223 | No  | NA    | 0  | 12 | Not-determined | Genome-fragment | NA    | 0     |
| 512_k141_103612                               | 1904  | No  | NA    | 0  | 1  | Low-quality    | Genome-fragment | 0.33  | 0     |
| 57-final-viral-combined_k141_46985 [full]     | 3638  | No  | NA    | 0  | 2  | Not-determined | Genome-fragment | NA    | 0     |
| 57-final-viral-combined_k141_148782 [full]    | 1343  | No  | NA    | 0  | 0  | Not-determined | Genome-fragment | NA    | 0     |
| 57-final-viral-combined_k141_97845 [full]     | 1969  | No  | NA    | 0  | 0  | Not-determined | Genome-fragment | NA    | 0     |
| 57-final-viral-combined_k141_180058 [full]    | 1522  | No  | NA    | 0  | 1  | Not-determined | Genome-fragment | NA    | 0     |
| 52-final-viral-combined_k141_38046 [full]     | 1904  | No  | NA    | 0  | 1  | Low-quality    | Genome-fragment | 3.18  | 0     |
| 511-final-viral-combined_k141_119177 [full]   | 1905  | No  | NA    | 0  | 2  | Low-quality    | Genome-fragment | 0.61  | 0     |
| 55-final-viral-combined_k141_190346 [full]    | 1905  | No  | NA    | 0  | 0  | Low-quality    | Genome-fragment | 4.6   | 0     |
| 57-final-viral-combined_k141_219430 [full]    | 1004  | No  | NA    | 0  | 0  | Not-determined | Genome-fragment | NA    | 0     |
| 512-final-viral-combined_k141_255245 [full]   | 1905  | No  | NA    | 0  | 0  | Low-quality    | Genome-fragment | 4.94  | 0     |
| 512-final-viral-combined_k141_33544 [full]    | 1905  | No  | NA    | 0  | 1  | Low-quality    | Genome-fragment | 1.07  | 0     |
| 57-final-viral-combined_k141_5990 [full]      | 1708  | No  | NA    | 0  | 1  | Not-determined | Genome-fragment | NA    | 0     |
| 57-final-viral-combined_k141_148827 [full]    | 1568  | No  | NA    | 0  | 2  | Not-determined | Genome-fragment | NA    | 0     |
| 57-final-viral-combined_k141_211047 [full]    | 1789  | No  | NA    | 0  | 0  | Not-determined | Genome-fragment | NA    | 0     |
| 57-final-viral-combined_k141_107703 [full]    | 2037  | No  | NA    | 0  | 1  | Not-determined | Genome-fragment | NA    | 0     |
| 52-final-viral-combined_k141_167789 [full]    | 1905  | No  | NA    | 0  | 1  | Low-quality    | Genome-fragment | 0.6   | 0     |
| 57-final-viral-combined_k141_241412 [full]    | 2545  | No  | NA    | 0  | 1  | Not-determined | Genome-fragment | NA    | 0     |
| 57-final-viral-combined_k141_241416 [full]    | 1613  | No  | NA    | 0  | 1  | Not-determined | Genome-fragment | NA    | 0     |
| 57-final-viral-combined_k141_190594 [full]    | 2504  | No  | NA    | 0  | 0  | Not-determined | Genome-fragment | NA    | 0     |
| 56-final-viral-combined_k141_95692 [full]     | 1905  | No  | NA    | 0  | 0  | Low-quality    | Genome-fragment | 4.41  | 0     |
| 57-final-viral-combined_k141_6032 [full]      | 1556  | No  | NA    | 0  | 1  | Not-determined | Genome-fragment | NA    | 0     |
| 57-final-viral-combined_k141_37344 [full]     | 3889  | No  | NA    | 0  | 1  | Not-determined | Genome-fragment | NA    | 0     |
| 57-final-viral-combined_k141_148879 [full]    | 1881  | No  | NA    | 0  | 2  | Not-determined | Genome-fragment | NA    | 0     |
| 57-final-viral-combined_k141_87554 [full]     | 3523  | No  | NA    | 0  | 0  | Not-determined | Genome-fragment | NA    | 0     |
| 57-final-viral-combined_k141_148886 [full]    | 1320  | No  | NA    | 0  | 0  | Not-determined | Genome-fragment | NA    | 0     |
| 57-final-viral-combined_k141_118973 [full]    | 1639  | No  | NA    | 0  | 2  | Not-determined | Genome-fragment | NA    | 0     |
| 58-final-viral-combined_k141_228966 [full]    | 1905  | No  | NA    | 0  | 0  | Low-quality    | Genome-fragment | 2.96  | 0     |
| 57-final-viral-combined_k141_118998 [full]    | 2032  | No  | NA    | 0  | 2  | Not-determined | Genome-fragment | NA    | 0     |
| 57-final-viral-combined_k141_87576 [full]     | 1477  | No  | NA    | 0  | 1  | Not-determined | Genome-fragment | NA    | 0     |
| 58_k141_97296                                 | 1905  | No  | NA    | 0  | 1  | Low-quality    | Genome-fragment | 0.5   | 0     |
| 51-final-viral-combined_k141_144409 [full]    | 1906  | No  | NA    | 1  | 0  | Low-quality    | Genome-fragment | 2.3   | 0     |
| 57-final-viral-combined_k141_170216 [full]    | 1276  | No  | NA    | 0  | 0  | Not-determined | Genome-fragment | NA    | 0     |
| 57-final-viral-combined_k141_138912 [full]    | 1946  | No  | NA    | 0  | 1  | Not-determined | Genome-fragment | NA    | 0     |
| 51-final-viral-combined_k141_41703 [H2gene]   | 1906  | Yes | 918   | 1  | 1  | Low-quality    | Genome-fragment | 2.12  | 51.84 |
| 51_k141_162951                                | 1906  | No  | NA    | 0  | 0  | Low-quality    | Genome-fragment | 1.89  | 0     |
| 57-final-viral-combined_k141_129052 [full]    | 1132  | No  | NA    | 0  | 1  | Not-determined | Genome-fragment | NA    | 0     |
| 57-final-viral-combined_k141_47062 [full]     | 29107 | No  | NA    | 0  | 14 | Not-determined | Genome-fragment | NA    | 0     |
| 57-final-viral-combined_k141_25704 [full]     | 1754  | No  | NA    | 0  | 0  | Not-determined | Genome-fragment | NA    | 0     |
| 57-final-viral-combined_k141_168011 [full]    | 1674  | No  | NA    | 0  | 2  | Not-determined | Genome-fragment | NA    | 0     |
| 57-final-viral-combined_k141_125080 [full]    | 1906  | No  | NA    | 1  | 0  | Low-quality    | Genome-fragment | 3.75  | 0     |
| 57-final-viral-combined_k141_150602 [full]    | 1240  | No  | NA    | 0  | 1  | Not-determined | Genome-fragment | NA    | 0     |
| 57-final-viral-combined_k141_187151 [full]    | 1906  | No  | NA    | 0  | 0  | Low-quality    | Genome-fragment | 3.91  | 0     |
| 57-final-viral-combined_k141_190706 [full]    | 1830  | No  | NA    | 0  | 1  | Not-determined | Genome-fragment | NA    | 0     |
| 512-final-viral-combined_k141_319234 [full]   | 1906  | No  | NA    | 0  | 2  | Low-quality    | Genome-fragment | 0.14  | 0     |
| 57-final-viral-combined_k141_138938 [full]    | 1705  | No  | NA    | 2  | 2  | Not-determined | Genome-fragment | NA    | 0     |
| 54_k141_2538                                  | 1906  | No  | NA    | 0  | 1  | Low-quality    | Genome-fragment | 1.53  | 0     |
| 57-final-viral-combined_k141_190720 [full]    | 1461  | No  | NA    | 0  | 1  | Not-determined | Genome-fragment | NA    | 0     |
| 59_k141_96453                                 | 1907  | No  | NA    | 0  | 1  | Low-quality    | Genome-fragment | 0.71  | 0     |
| 51-final-viral-combined_k141_64731 [full]     | 1907  | No  | NA    | 0  | 1  | Low-quality    | Genome-fragment | 0.14  | 0     |
| 57-final-viral-combined_k141_138981 [full]    | 2701  | No  | NA    | 0  | 4  | Not-determined | Genome-fragment | NA    | 0     |
| 57-final-viral-combined_k141_47186 [full]     | 2035  | No  | NA    | 0  | 1  | Not-determined | Genome-fragment | NA    |       |



|                                      |            |       |    |                |                    |                    |      |       |
|--------------------------------------|------------|-------|----|----------------|--------------------|--------------------|------|-------|
| 59_k141_55853                        | 1912 No    | NA    | 1  | 0              | Low-quality        | Genome-fragment    | 3.97 | 0     |
| 53_k141_10647                        | 1912 No    | NA    | 0  | 0              | Low-quality        | Genome-fragment    | 3.51 | 0     |
| 57-final-viral-combined_k141_219617  | 1097 No    | NA    | 0  | 0              | Not-determined     | Genome-fragment NA |      | 0     |
| 57-final-viral-combined_k141_190927  | 10862 No   | NA    | 0  | 2              | Not-determined     | Genome-fragment NA |      | 0     |
| 512-final-viral-combined_k141_34280  | 1912 No    | NA    | 0  | 0              | Low-quality        | Genome-fragment    | 4.71 | 0     |
| 57-final-viral-combined_k141_192381  | 1106 No    | NA    | 0  | 1              | Not-determined     | Genome-fragment NA | 0    | 0     |
| 57-final-viral-combined_k141_47376   | 1255 No    | NA    | 0  | 1              | Not-determined     | Genome-fragment NA |      | 0     |
| 512-final-viral-combined_k141_370486 | 1912 No    | NA    | 2  | 0              | Low-quality        | Genome-fragment    | 5.03 | 0     |
| 51-final-viral-combined_k141_232526  | 1913 No    | NA    | 0  | 0              | Low-quality        | Genome-fragment    | 3.07 | 0     |
| 57-final-viral-combined_k141_26076   | 1243 No    | NA    | 0  | 0              | Not-determined     | Genome-fragment NA |      | 0     |
| 53-final-viral-combined_k141_4969    | 1913 No    | NA    | 0  | 0              | Low-quality        | Genome-fragment    |      | 3.28  |
| 55_k141_155022                       | 1913 No    | NA    | 0  | 0              | Low-quality        | Genome-fragment    | 4.73 | 0     |
| 57-final-viral-combined_k141_57699   | 1128 No    | NA    | 0  | 0              | Not-determined     | Genome-fragment NA |      | 0     |
| 57-final-viral-combined_k141_190956  | 1962 No    | NA    | 0  | 2              | Not-determined     | Genome-fragment NA |      | 0     |
| 57-final-viral-combined_k141_190560  | 1402 No    | NA    | 0  | 2              | Not-determined     | Genome-fragment NA |      | 0     |
| 57-final-viral-combined_k141_187301  | 1913 No    | NA    | 0  | 0              | Low-quality        | Genome-fragment    | 2.58 | 0     |
| 517-final-viral-combined_k141_89952  | 1913 No    | NA    | 0  | 0              | Low-quality        | Genome-fragment    | 1.8  | 0     |
| 57-final-viral-combined_k141_16711   | 1505 No    | NA    | 0  | 1              | Not-determined     | Genome-fragment NA |      | 0     |
| 57-final-viral-combined_k141_27653   | 1913 No    | NA    | 0  | 0              | Low-quality        | Genome-fragment    |      | 4.34  |
| 512-final-viral-combined_k141_275119 | 1913 No    | NA    | 2  | 0              | Low-quality        | Genome-fragment    | 2.56 | 0     |
| 52-final-viral-combined_k141_130713  | 1913 No    | NA    | 0  | 0              | Low-quality        | Genome-fragment    |      | 2.56  |
| 57-final-viral-combined_k141_231251  | 1247 No    | NA    | 0  | 1              | Not-determined     | Genome-fragment NA |      | 0     |
| 57-final-viral-combined_k141_37708   | 11098 No   | NA    | 0  | 6              | Not-determined     | Genome-fragment NA |      | 0     |
| 52_k141_235536                       | 1913 No    | NA    | 1  | 0              | Low-quality        | Genome-fragment    | 6.48 | 0     |
| 57-final-viral-combined_k141_26123   | 1372 No    | NA    | 0  | 1              | Not-determined     | Genome-fragment NA |      | 0     |
| 52_k141_30772                        | 1913 No    | NA    | 0  | 0              | Low-quality        | Genome-fragment    | 3.02 | 0     |
| 57-final-viral-combined_k141_231281  | 1585 No    | NA    | 0  | 1              | Not-determined     | Genome-fragment NA |      | 0     |
| 56-final-viral-combined_k141_106495  | 1913 No    | NA    | 3  | 0              | Low-quality        | Genome-fragment    | 3.23 | 0     |
| 57-final-viral-combined_k141_68493   | 3346 No    | NA    | 0  | 2              | Not-determined     | Genome-fragment NA | 0    | 0     |
| 57-final-viral-combined_k141_211359  | 5016 No    | NA    | 0  | 2              | Not-determined     | Genome-fragment NA |      | 0     |
| 58-final-viral-combined_k141_227041  | 1913 No    | NA    | 1  | 0              | Low-quality        | Genome-fragment    | 3.33 | 0     |
| 57-final-viral-combined_k141_139246  | 2581 No    | NA    | 3  | Not-determined | Genome-fragment NA |                    |      | 0     |
| 511-final-viral-combined_k141_10606  | 1914 No    | NA    | 0  | 0              | Low-quality        | Genome-fragment    | 1.35 | 0     |
| 57-final-viral-combined_k141_201431  | 1244 No    | NA    | 0  | 0              | Not-determined     | Genome-fragment NA |      | 0     |
| 512_k141_1317731                     | 1914 No    | NA    | 2  | 0              | Low-quality        | Genome-fragment    | 3.69 | 0     |
| 52-final-viral-combined_k141_114077  | 1914 No    | NA    | 1  | 2              | Low-quality        | Genome-fragment    | 1.54 | 0     |
| 57-final-viral-combined_k141_139285  | 2452 No    | NA    | 0  | 3              | Not-determined     | Genome-fragment NA |      | 0     |
| 52-final-viral-combined_k141_5176    | 1914 No    | NA    | 0  | 2              | Low-quality        | Genome-fragment    | 1.53 | 0     |
| 57-final-viral-combined_k141_6557    | 3194 No    | NA    | 1  | Not-determined | Genome-fragment NA | 0                  | 0    |       |
| 57-final-viral-combined_k141_47559   | 2960 No    | NA    | 0  | 3              | Not-determined     | Genome-fragment NA |      | 0     |
| 57-final-viral-combined_k141_170608  | 2346 No    | NA    | 0  | 1              | Not-determined     | Genome-fragment NA |      | 0     |
| 57-final-viral-combined_k141_160179  | 1680 No    | NA    | 2  | Not-determined | Genome-fragment NA |                    |      | 0     |
| 57-final-viral-combined_k141_68539   | 2485 No    | NA    | 0  | 0              | Not-determined     | Genome-fragment NA |      | 0     |
| 52-final-viral-combined_k141_79360   | 1914 No    | NA    | 1  | 0              | Low-quality        | Genome-fragment    | 4.95 | 0     |
| 57-final-viral-combined_k141_475741  | 1423 No    | NA    | 0  | 0              | Not-determined     | Genome-fragment NA |      | 0     |
| 57-final-viral-combined_k141_107981  | 4248 No    | NA    | 0  | 3              | Not-determined     | Genome-fragment NA |      | 0     |
| 57-final-viral-combined_k141_88053   | 3225 No    | NA    | 0  | 0              | Not-determined     | Genome-fragment NA |      | 0     |
| 58-final-viral-combined_k141_127765  | 1915 No    | NA    | 1  | 0              | Low-quality        | Genome-fragment    | 4.66 | 0     |
| 51-final-viral-combined_k141_181611  | 1915 No    | NA    | 0  | 2              | Low-quality        | Genome-fragment    | 3.69 | 0     |
| 57-final-viral-combined_k141_98490   | 2821 No    | NA    | 0  | 0              | Not-determined     | Genome-fragment NA |      | 0     |
| 51_k141_382923                       | 1915 No    | NA    | 0  | 0              | Low-quality        | Genome-fragment    | 2.86 | 0     |
| 57-final-viral-combined_k141_241761  | 2810 No    | NA    | 0  | 1              | Not-determined     | Genome-fragment NA | 0    | 0     |
| 57-final-viral-combined_k141_129416  | 1408 No    | NA    | 0  | 1              | Not-determined     | Genome-fragment NA |      | 0     |
| 57-final-viral-combined_k141_57878   | 1546 No    | NA    | 0  | 1              | Not-determined     | Genome-fragment NA |      | 0     |
| 512_k141_4343                        | 1915 No    | NA    | 1  | 0              | Low-quality        | Genome-fragment    | 5.06 | 0     |
| 57-final-viral-combined_k141_16863   | 2940 No    | NA    | 0  | 2              | Not-determined     | Genome-fragment NA |      | 0     |
| 54_k141_39675                        | 1915 No    | NA    | 0  | 0              | Low-quality        | Genome-fragment    | 2.83 | 0     |
| 57-final-viral-combined_k141_160275  | 3121 No    | NA    | 0  | 2              | Not-determined     | Genome-fragment NA | 3.93 | 0     |
| 56-final-viral-combined_k141_244523  | 1915 No    | NA    | 0  | 0              | Low-quality        | Genome-fragment    |      | 0     |
| 56-final-viral-combined_k141_20713   | 1915 No    | NA    | 0  | 2              | Low-quality        | Genome-fragment    | 2.3  | 0     |
| 58_k141_128132                       | 1915 No    | NA    | 0  | 0              | Low-quality        | Genome-fragment    | 1.99 | 0     |
| 54-final-viral-combined_k141_60373   | 1916 No    | NA    | 0  | 1              | Low-quality        | Genome-fragment    | 1.33 | 0     |
| 51-final-viral-combined_k141_191754  | 1917 No    | NA    | 1  | 0              | Low-quality        | Genome-fragment    | 5.86 | 0     |
| 517_k141_562                         | 1917 No    | NA    | 0  | 0              | Low-quality        | Genome-fragment    | 3.22 | 0     |
| 57-final-viral-combined_k141_211464  | 1271 No    | NA    | 0  | 0              | Not-determined     | Genome-fragment NA |      | 0     |
| 57-final-viral-combined_k141_26217   | 110872 Yes | 47662 | 10 | 44             | Complete           | High-quality       | 100  | 57.01 |
| 57-final-viral-combined_k141_98581   | 1932 No    | NA    | 0  | 0              | Not-determined     | Genome-fragment NA |      | 0     |
| 57-final-viral-combined_k141_26221   | 6586 No    | NA    | 0  | 5              | Not-determined     | Genome-fragment NA |      | 0     |
| 57-final-viral-combined_k141_211483  | 2376 No    | NA    | 0  | 1              | Not-determined     | Genome-fragment NA |      | 0     |
| 57-final-viral-combined_k141_219782  | 1583 No    | NA    | 0  | 2              | Not-determined     | Genome-fragment NA |      | 0     |
| 57-final-viral-combined_k141_98585   | 5148 No    | NA    | 0  | 2              | Not-determined     | Genome-fragment NA |      | 0     |
| 512-final-viral-combined_k141_346756 | 1917 No    | NA    | 0  | 0              | Low-quality        | Genome-fragment    | 3.54 | 0     |
| 57-final-viral-combined_k141_231493  | 6682 No    | NA    | 0  | 1              | Not-determined     | Genome-fragment NA |      | 0     |
| 57-final-viral-combined_k141_16938   | 3579 No    | NA    | 0  | 0              | Not-determined     | Genome-fragment NA |      | 0     |
| 57-final-viral-combined_k141_77738   | 7361 No    | NA    | 0  | 3              | Not-determined     | Genome-fragment NA |      | 0     |
| 57-final-viral-combined_k141_119417  | 3752 No    | NA    | 0  | 3              | Not-determined     | Genome-fragment NA |      | 0     |
| 512_k141_221016                      | 1917 No    | NA    | 0  | 0              | Low-quality        | Genome-fragment    | 5.93 | 0     |
| 52-final-viral-combined_k141_94583   | 1917 No    | NA    | 0  | 0              | Low-quality        | Genome-fragment    | 4.47 | 0     |
| 56_k141_61677                        | 1917 No    | NA    | 0  | 1              | Low-quality        | Genome-fragment    | 3.72 | 0     |
| 51-final-viral-combined_k141_299951  | 1918 No    | NA    | 0  | 1              | Low-quality        | Genome-fragment    | 4.05 | 0     |
| 57-final-viral-combined_k141_160388  | 2490 No    | NA    | 0  | 1              | Not-determined     | Genome-fragment NA |      | 0     |
| 57-final-viral-combined_k141_139346  | 1611 No    | NA    | 0  | 2              | Not-determined     | Genome-fragment NA |      | 0     |
| 53_k141_123103                       | 1918 No    | NA    | 0  | 0              | Low-quality        | Genome-fragment    | 5.1  | 0     |
| 57-final-viral-combined_k141_47813   | 2228 No    | NA    | 0  | 0              | Not-determined     | Genome-fragment NA |      | 2.83  |
| 55_k141_55940                        | 1918 No    | NA    | 0  | 1              | Low-quality        | Genome-fragment    |      | 0     |
| 57-final-viral-combined_k141_26327   | 2702 No    | NA    | 0  | 3              | Not-determined     | Genome-fragment NA |      | 0     |
| 57-final-viral-combined_k141_160434  | 1247 No    | NA    | 0  | 2              | Not-determined     | Genome-fragment NA |      | 0     |
| 57-final-viral-combined_k141_215135  | 1918 No    | NA    | 5  | 0              | Low-quality        | Genome-fragment    | 4.71 | 0     |
| 57-final-viral-combined_k141_119483  | 1385 No    | NA    | 0  | 2              | Not-determined     | Genome-fragment NA |      | 0     |
| 517-final-viral-combined_k141_169973 | 1918 No    | NA    | 2  | 0              | Low-quality        | Genome-fragment    | 5.07 | 0     |
| 57-final-viral-combined_k141_26333   | 2585 No    | NA    | 0  | 3              | Not-determined     | Genome-fragment NA |      | 0     |
| 57-final-viral-combined_k141_149349  | 1317 No    | NA    | 0  | 0              | Not-determined     | Genome-fragment NA |      | 0     |
| 512-final-viral-combined_k141_251386 | 1918 No    | NA    | 0  | 0              | Low-quality        | Genome-fragment    | 5.01 | 0     |
| 57-final-viral-combined_k141_160461  | 3771 No    | NA    | 0  | 3              | Not-determined     | Genome-fragment NA |      | 0     |
| 57-final-viral-combined_k141_191363  | 3459 No    | NA    | 0  | 1              | Not-determined     | Genome-fragment NA |      | 0     |
| 57-final-viral-combined_k141_199456  | 3910 No    | NA    | 0  | 3              | Not-determined     | Genome-fragment NA |      | 0     |
| 57-final-viral-combined_k141_108202  | 1561 No    | NA    | 0  | 1              | Not-determined     | Genome-fragment NA |      | 0     |
| 57-final-viral-combined_k141_129681  | 3441 No    | NA    | 0  | 0              | Not-determined     | Genome-fragment NA |      | 0     |
| 57-final-viral-combined_k141_180673  | 2468 No    | NA    | 0  | 1              | Not-determined     | Genome-fragment NA |      | 0     |
| 57-final-viral-combined_k141_119524  | 1659 No    | NA    | 0  | 0              | Not-determined     | Genome-fragment NA |      | 0     |
| 57-final-viral-combined_k141_180677  | 2698 No    | NA    | 0  | 0              | Not-determined     | Genome-fragment NA |      | 0     |
| 512-final-viral-combined_k141_161043 | 1918 No    | NA    | 0  | 0              | Low-quality        | Genome-fragment    | 3.08 | 0     |
| 54-final-viral-combined_k141_135883  | 1918 No    | NA    | 0  | 2              | Low-quality        | Genome-fragment    | 1.7  | 0     |
| 59-final-viral-combined_k141_13737   | 1919 No    | NA    | 4  | 0              | Low-quality        | Genome-fragment    | 2.94 | 0     |
| 57-final-viral-combined_k141_219905  | 2556 No    | NA    | 0  | 2              | Not-determined     | Genome-fragment NA |      | 0     |
| 51_k141_375347                       | 1919 No    | NA    | 0  | 0              | Low-quality        | Genome-fragment    | 2.87 | 0     |
| 57-final-viral-combined_k141_174169  | 1919 No    | NA    | 0  | 0              | Low-quality        | Genome-fragment    | 1.87 | 0     |
| 57-final-viral-combined_k141_231638  | 2692 No    | NA    | 0  | 2              | Not-determined     | Genome-fragment NA |      | 0     |
| 57-final-viral-combined_k141_170669  | 1759 No    | NA    | 0  | 0              | Not-determined     | Genome-fragment NA |      | 0     |
| 57-final-viral-combined_k141_17153   | 3071 No    | NA    | 0  | 0              | Not-determined     | Genome-fragment NA |      | 1.29  |
| 57-final-viral-combined_k141_123088  | 1919 No    | NA    | 0  | 2              | Low-quality        | Genome-fragment    |      | 0     |
| 57-final-viral-combined_k141_28767   | 3844 No    | NA    | 0  | 0              | Not-determined     | Genome-fragment NA |      | 0     |
| 57-final-viral-combined_k141_149506  | 2564 No    | NA    | 0  | 2              | Not-determined     | Genome-fragment NA |      | 0     |
| 57-final-viral-combined_k141_17189   | 2498 No    | NA    | 0  | 1              | Not-determined     | Genome-fragment NA |      | 0     |
| 57-final-viral-combined_k141_119653  | 1180 No    | NA    | 0  | 0              | Not-determined     | Genome-fragment NA |      | 0     |
| 57-final-viral-combined_k141_26440   | 6353 No    | NA    | 0  | 5              | Not-determined     | Genome-fragment NA |      | 0     |
| 57-final-viral-combined_k141_161889  | 1919 No    | NA    | 0  | 1              | Low-quality        | Genome-fragment    | 1.58 | 0     |
| 512-final-viral-combined_k141_285840 | 1919 No    | NA    | 0  | 0              | Low-quality        | Genome-fragment    | 0.59 | 0     |
| 512-final-viral-combined_k141_192004 | 1919 No    | NA    | 1  | 0              | Low-quality        | Genome-fragment    | 0.88 | 0     |
| 52-final-viral-combined_k141_98502   | 1919 No    | NA    | 1  | 0              | Low-quality        | Genome-fragment    | 4.33 | 0     |
| 52_k141_219159                       | 1919 No    | NA    | 0  | 0              | Low-quality        | Genome-fragment    | 2.74 | 0     |
| 57-final-viral-combined_k141_149557  | 1400 No    | NA    | 0  | 0              | Not-determined     | Genome-fragment NA |      | 0     |
| 56-final-viral-combined_k141_72511   | 1919 No    | NA    | 0  | 0              | Low-quality        | Genome-fragment    | 1.02 | 0     |
| 57-final-viral-combined_k141_160674  | 1672 No    | NA    | 0  | 1              | Not-determined     | Genome-fragment NA |      | 4.86  |
| 58-final-viral-combined_k141_213310  | 1919 No    | NA    | 0  | 0              | Low-quality        | Genome-fragment    |      | 0     |
| 57-final-viral-combined_k141_77951   | 7528 No    | NA    | 0  | 6              | Not-determined     | Genome-fragment NA |      | 0     |
| 57-final-viral-combined_k141_203823  | 1920 No    | NA    | 2  | 0              | Low-quality        | Genome-fragment    | 3.16 | 0     |
| 57-final-viral-combined_k141_231785  | 1280 No    | NA    | 0  | 1              | Not-determined     | Genome-fragment NA |      | 0     |
| 57-final-viral-combined_k141_77953   | 7939 No    | NA    | 0  | 6              | Not-determined     | Genome-fragment NA |      | 0     |
| 57-final-viral-combined_k141_18798   | 1920 No    | NA    | 2  | 0              | Low-quality        | Genome-fragment    | 4.07 | 0     |
| 517-final-viral-combined_k141_95219  | 1920 No    | NA    | 0  | 0              | Low-quality        | Genome-fragment    | 4.25 | 0     |
| 57-final-viral-combined_k141_211795  | 2361 No    | NA    | 0  | 0              | Not-determined     | Genome-fragment NA |      | 0     |
| 512-final-viral-combined_k141_9529   | 1920 No    | NA    | 0  | 0              | Low-quality        | Genome-fragment    | 4.44 | 0     |
| 52_k141_129601                       | 1920 No    | NA    | 0  | 0              | Low-quality        | Genome-fragment    | 5.42 | 0     |
| 57-final-viral-combined_k141_191579  | 3357 No    | NA    | 0  | 23             | Not-determined     | Genome-fragment NA |      | 0     |
| 57-final-viral-combined_k141_220053  | 3322 No    | NA    | 0  | 2              | Not-determined     | Genome-fragment NA |      | 0     |
| 54-final-viral-combined_k141_94488   | 1920 No    | NA    | 1  | 0              | Low-quality        | Genome-fragment    | 1.86 | 0     |
| 57-final-viral-combined_k141_170676  | 1990 No    | NA    | 0  | 2              | Not-determined     | Genome-fragment NA |      | 0     |
| 57-final-viral-combined_k141_69024   | 20632 No   | NA    | 17 | 0              | Medium-quality     | Genome-fragment    | 59.4 | 0     |
| 58-final-viral-combined_k141_115659  | 1920 No    | NA    | 2  | 0              | Low-quality        | Genome-fragment    | 4.58 | 0     |
| 57-final-viral-combined_k141_38149   | 3525 No    | NA    | 0  | 2              | Not-determined     | Genome-fragment NA |      | 0     |
| 57-final-viral-combined_k141_78033   | 1993 No    | NA    | 0  | 1              | Not-determined     | Genome-fragment NA |      | 0     |
| 57-final-viral-combined_k141_48066   | 1244 No    | NA    | 0  | 1              | Not-determined     | Genome-fragment NA |      | 0     |
| 57-final-viral-combined_k141_7029    | 1993 No    | NA    |    |                |                    |                    |      |       |



|                                        |          |        |     |       |    |   |                |                 |    |       |       |
|----------------------------------------|----------|--------|-----|-------|----|---|----------------|-----------------|----|-------|-------|
| S7-final-viral-combined_k141_191718]]  | [full]   | 1802   | No  | NA    | 0  | 0 | Not-determined | Genome-fragment | NA | 0     | 0     |
| S7-final-viral-combined_k141_202020]]  | [full]   | 1308   | No  | NA    | 0  | 0 | Not-determined | Genome-fragment | NA | 0     | 0     |
| S12-final-viral-combined_k141_17744]]  | [full]   | 1924   | No  | NA    | 2  | 0 | Low-quality    | Genome-fragment | NA | 3.59  | 0     |
| S12-final-viral-combined_k141_38003]]  | [full]   | 1924   | Yes | 714   | 1  | 1 | Low-quality    | Genome-fragment | NA | 0.56  | 62.89 |
| S7-final-viral-combined_k141_26613]]   | [full]   | 1179   | No  | NA    | 0  | 0 | Not-determined | Genome-fragment | NA | 0     | 0     |
| S8_k141_130932                         |          | 1924   | No  | NA    | 1  | 0 | Low-quality    | Genome-fragment | NA | 4.47  | 0     |
| S1_k141_109308                         |          | 1925   | No  | NA    | 0  | 1 | Low-quality    | Genome-fragment | NA | 2.34  | 0     |
| S7-final-viral-combined_k141_161030]]  | [full]   | 1564   | No  | NA    | 0  | 1 | Not-determined | Genome-fragment | NA | 4.05  | 0     |
| S5-final-viral-combined_k141_49631]]   | [full]   | 1925   | No  | NA    | 0  | 1 | Low-quality    | Genome-fragment | NA | 4.05  | 0     |
| S7-final-viral-combined_k141_181215]]  | [full]   | 2281   | No  | NA    | 0  | 2 | Not-determined | Genome-fragment | NA | 0     | 0     |
| S7-final-viral-combined_k141_130068]]  | [full]   | 3762   | No  | NA    | 0  | 0 | Not-determined | Genome-fragment | NA | 0     | 0     |
| S7-final-viral-combined_k141_59232]]   | [full]   | 2174   | No  | NA    | 0  | 1 | Not-determined | Genome-fragment | NA | 0     | 0     |
| S7-final-viral-combined_k141_202033]]  | [full]   | 2378   | No  | NA    | 0  | 1 | Not-determined | Genome-fragment | NA | 0     | 0     |
| S7-final-viral-combined_k141_233907]]  | [full]   | 1925   | No  | NA    | 0  | 1 | Low-quality    | Genome-fragment | NA | 1.47  | 0     |
| S17-final-viral-combined_k141_115983]] | [full]   | 1925   | No  | NA    | 2  | 0 | Low-quality    | Genome-fragment | NA | 4.43  | 0     |
| S7-final-viral-combined_k141_151767]]  | [full]   | 7333   | No  | NA    | 0  | 1 | Not-determined | Genome-fragment | NA | 0     | 0     |
| S12-final-viral-combined_k141_54615]]  | [full]   | 1925   | Yes | 962   | 1  | 1 | Low-quality    | Genome-fragment | NA | 1.86  | 50.03 |
| S7-final-viral-combined_k141_139767]]  | [full]   | 1831   | No  | NA    | 0  | 0 | Not-determined | Genome-fragment | NA | 0     | 0     |
| S7-final-viral-combined_k141_38311]]   | [full]   | 1835   | No  | NA    | 0  | 0 | Not-determined | Genome-fragment | NA | 0     | 0     |
| S2-final-viral-combined_k141_105555]]  | [full]   | 1925   | No  | NA    | 0  | 0 | Low-quality    | Genome-fragment | NA | 4.76  | 0     |
| S4-final-viral-combined_k141_31688]]   | [full]   | 1925   | No  | NA    | 0  | 0 | Low-quality    | Genome-fragment | NA | 5.37  | 0     |
| S7-final-viral-combined_k141_192788]]  | [full]   | 1882   | No  | NA    | 0  | 2 | Not-determined | Genome-fragment | NA | 0     | 0     |
| S7-final-viral-combined_k141_161073]]  | [full]   | 2522   | No  | NA    | 0  | 1 | Not-determined | Genome-fragment | NA | 0     | 0     |
| S6_k141_88664                          |          | 1925   | No  | NA    | 0  | 0 | Low-quality    | Genome-fragment | NA | 2.05  | 0     |
| S7-final-viral-combined_k141_120088]]  | [full]   | 1832   | No  | NA    | 0  | 1 | Not-determined | Genome-fragment | NA | 0     | 0     |
| S7-final-viral-combined_k141_170868]]  | [full]   | 4119   | No  | NA    | 0  | 0 | Not-determined | Genome-fragment | NA | 0     | 0     |
| S7-final-viral-combined_k141_99185]]   | [full]   | 2155   | No  | NA    | 0  | 0 | Not-determined | Genome-fragment | NA | 0     | 0     |
| S7-final-viral-combined_k141_220206]]  | [full]   | 1526   | No  | NA    | 0  | 0 | Not-determined | Genome-fragment | NA | 0     | 0     |
| S11-final-viral-combined_k141_272020]] | [full]   | 1926   | No  | NA    | 0  | 1 | Low-quality    | Genome-fragment | NA | 0.52  | 0     |
| S5-final-viral-combined_k141_91620]]   | [full]   | 1926   | No  | NA    | 1  | 0 | Low-quality    | Genome-fragment | NA | 4.32  | 0     |
| S7-final-viral-combined_k141_48337]]   | [full]   | 1346   | No  | NA    | 0  | 0 | Not-determined | Genome-fragment | NA | 0     | 0     |
| S7-final-viral-combined_k141_26679]]   | [full]   | 6079   | No  | NA    | 0  | 2 | Not-determined | Genome-fragment | NA | 0     | 0     |
| S7-final-viral-combined_k141_170918]]  | [full]   | 1593   | No  | NA    | 0  | 1 | Not-determined | Genome-fragment | NA | 0     | 0     |
| S7-final-viral-combined_k141_149941]]  | [full]   | 3918   | No  | NA    | 0  | 2 | Not-determined | Genome-fragment | NA | 0     | 0     |
| S7-final-viral-combined_k141_7205]]    | [full]   | 70578  | Yes | 62239 | 25 | 8 | High-quality   | High-quality    | NA | 100   | 11.82 |
| S7-final-viral-combined_k141_88696]]   | [full]   | 1814   | No  | NA    | 0  | 1 | Not-determined | Genome-fragment | NA | 0     | 0     |
| S7-final-viral-combined_k141_58554]]   | [full]   | 20916  | No  | NA    | 0  | 5 | Not-determined | Genome-fragment | NA | 0     | 0     |
| S5-final-viral-combined_k141_101735]]  | [H2gene] | 1926   | No  | NA    | 1  | 0 | Low-quality    | Genome-fragment | NA | 3.18  | 0     |
| S7-final-viral-combined_k141_149579]]  | [full]   | 2812   | No  | NA    | 0  | 2 | Not-determined | Genome-fragment | NA | 0     | 0     |
| S7-final-viral-combined_k141_167931]]  | [full]   | 1926   | No  | NA    | 0  | 2 | Low-quality    | Genome-fragment | NA | 2.44  | 0     |
| S7_k141_138518                         |          | 1926   | No  | NA    | 1  | 0 | Low-quality    | Genome-fragment | NA | 1.8   | 0     |
| S6-final-viral-combined_k141_73389]]   | [H2gene] | 1926   | No  | NA    | 0  | 1 | Low-quality    | Genome-fragment | NA | 2.84  | 0     |
| S7-final-viral-combined_k141_220285]]  | [full]   | 1336   | No  | NA    | 0  | 1 | Not-determined | Genome-fragment | NA | 0     | 0     |
| S7-final-viral-combined_k141_48400]]   | [full]   | 2588   | No  | NA    | 0  | 2 | Not-determined | Genome-fragment | NA | 0     | 0     |
| S7-final-viral-combined_k141_69319]]   | [full]   | 4261   | No  | NA    | 0  | 3 | Not-determined | Genome-fragment | NA | 0     | 0     |
| S7-final-viral-combined_k141_220287]]  | [full]   | 1476   | No  | NA    | 0  | 2 | Not-determined | Genome-fragment | NA | 0     | 0     |
| S7-final-viral-combined_k141_232238]]  | [full]   | 1932   | No  | NA    | 0  | 1 | Not-determined | Genome-fragment | NA | 0     | 0     |
| S7-final-viral-combined_k141_120200]]  | [full]   | 1459   | No  | NA    | 0  | 2 | Not-determined | Genome-fragment | NA | 0     | 0     |
| S7-final-viral-combined_k141_120207]]  | [full]   | 2116   | No  | NA    | 0  | 2 | Not-determined | Genome-fragment | NA | 0     | 0     |
| S8-final-viral-combined_k141_28720]]   | [full]   | 1926   | No  | NA    | 0  | 0 | Low-quality    | Genome-fragment | NA | 2.24  | 0     |
| S7-final-viral-combined_k141_130204]]  | [full]   | 1215   | No  | NA    | 0  | 1 | Not-determined | Genome-fragment | NA | 0     | 0     |
| S7-final-viral-combined_k141_191251]]  | [full]   | 1151   | No  | NA    | 0  | 2 | Not-determined | Genome-fragment | NA | 0     | 0     |
| S1-final-viral-combined_k141_297483]]  | [full]   | 1927   | No  | NA    | 0  | 0 | Low-quality    | Genome-fragment | NA | 4.32  | 0     |
| S17-final-viral-combined_k141_76028]]  | [full]   | 1927   | No  | NA    | 0  | 2 | Low-quality    | Genome-fragment | NA | 2.24  | 0     |
| S6_k141_113573                         |          | 1927   | No  | NA    | 2  | 0 | Low-quality    | Genome-fragment | NA | 1.03  | 0     |
| S9-final-viral-combined_k141_43439]]   | [full]   | 1928   | No  | NA    | 0  | 0 | Low-quality    | Genome-fragment | NA | 3.16  | 0     |
| S7-final-viral-combined_k141_202258]]  | [full]   | 1925   | No  | NA    | 0  | 2 | Not-determined | Genome-fragment | NA | 0     | 0     |
| S7-final-viral-combined_k141_38538]]   | [full]   | 1209   | No  | NA    | 0  | 0 | Not-determined | Genome-fragment | NA | 0     | 0     |
| S7-final-viral-combined_k141_7298]]    | [full]   | 1982   | No  | NA    | 0  | 1 | Not-determined | Genome-fragment | NA | 0     | 0     |
| S7-final-viral-combined_k141_7308]]    | [full]   | 2295   | No  | NA    | 0  | 2 | Not-determined | Genome-fragment | NA | 0     | 0     |
| S7-final-viral-combined_k141_232300]]  | [full]   | 1765   | No  | NA    | 0  | 0 | Not-determined | Genome-fragment | NA | 0     | 0     |
| S7-final-viral-combined_k141_48505]]   | [full]   | 2715   | No  | NA    | 0  | 2 | Not-determined | Genome-fragment | NA | 0     | 0     |
| S7-final-viral-combined_k141_17607]]   | [full]   | 6189   | No  | NA    | 0  | 2 | Not-determined | Genome-fragment | NA | 0     | 0     |
| S9-final-viral-combined_k141_57170]]   | [full]   | 1928   | No  | NA    | 2  | 0 | Low-quality    | Genome-fragment | NA | 4.76  | 0     |
| S11-final-viral-combined_k141_172085]] | [full]   | 1928   | No  | NA    | 0  | 0 | Low-quality    | Genome-fragment | NA | 3.73  | 0     |
| S7-final-viral-combined_k141_78382]]   | [full]   | 1060   | No  | NA    | 0  | 1 | Not-determined | Genome-fragment | NA | 0     | 0     |
| S7-final-viral-combined_k141_232321]]  | [full]   | 1196   | No  | NA    | 0  | 0 | Not-determined | Genome-fragment | NA | 0     | 0     |
| S7-final-viral-combined_k141_26723]]   | [full]   | 1351   | No  | NA    | 0  | 1 | Not-determined | Genome-fragment | NA | 0     | 0     |
| S7-final-viral-combined_k141_38577]]   | [full]   | 1607   | No  | NA    | 0  | 1 | Not-determined | Genome-fragment | NA | 0     | 0     |
| S7-final-viral-combined_k141_212175]]  | [full]   | 3349   | No  | NA    | 0  | 1 | Not-determined | Genome-fragment | NA | 0     | 0     |
| S7-final-viral-combined_k141_88839]]   | [full]   | 1488   | No  | NA    | 0  | 1 | Not-determined | Genome-fragment | NA | 0     | 0     |
| S7-final-viral-combined_k141_150151]]  | [full]   | 1356   | No  | NA    | 0  | 1 | Not-determined | Genome-fragment | NA | 0     | 0     |
| S7-final-viral-combined_k141_99395]]   | [full]   | 1844   | No  | NA    | 0  | 1 | Not-determined | Genome-fragment | NA | 0     | 0     |
| S1-final-viral-combined_k141_129093]]  | [full]   | 1928   | No  | NA    | 0  | 1 | Low-quality    | Genome-fragment | NA | 3.66  | 0     |
| S3-final-viral-combined_k141_24150]]   | [full]   | 1928   | No  | NA    | 0  | 0 | Low-quality    | Genome-fragment | NA | 5.08  | 0     |
| S7-final-viral-combined_k141_17698]]   | [full]   | 3159   | No  | NA    | 0  | 3 | Not-determined | Genome-fragment | NA | 0     | 0     |
| S7-final-viral-combined_k141_212226]]  | [full]   | 1075   | No  | NA    | 0  | 0 | Not-determined | Genome-fragment | NA | 0     | 0     |
| S7-final-viral-combined_k141_7411]]    | [full]   | 1566   | No  | NA    | 0  | 2 | Not-determined | Genome-fragment | NA | 0     | 0     |
| S7-final-viral-combined_k141_202391]]  | [full]   | 3663   | No  | NA    | 0  | 2 | Not-determined | Genome-fragment | NA | 0     | 0     |
| S7-final-viral-combined_k141_130372]]  | [full]   | 3132   | No  | NA    | 0  | 1 | Not-determined | Genome-fragment | NA | 0     | 0     |
| S3-final-viral-combined_k141_65948]]   | [full]   | 1928   | No  | NA    | 0  | 0 | Low-quality    | Genome-fragment | NA | 3.35  | 0     |
| S5-final-viral-combined_k141_205092]]  | [full]   | 1928   | No  | NA    | 0  | 0 | Low-quality    | Genome-fragment | NA | 0.53  | 0     |
| S7-final-viral-combined_k141_17747]]   | [full]   | 2731   | No  | NA    | 2  | 0 | Not-determined | Genome-fragment | NA | 0     | 0     |
| S5_k141_105181                         |          | 1928   | No  | NA    | 1  | 0 | Low-quality    | Genome-fragment | NA | 1.19  | 0     |
| S7-final-viral-combined_k141_09438]]   | [full]   | 1810   | No  | NA    | 0  | 2 | Not-determined | Genome-fragment | NA | 0     | 0     |
| S7-final-viral-combined_k141_88929]]   | [full]   | 2234   | No  | NA    | 0  | 1 | Not-determined | Genome-fragment | NA | 0     | 0     |
| S7-final-viral-combined_k141_130389]]  | [full]   | 1120   | No  | NA    | 0  | 1 | Not-determined | Genome-fragment | NA | 0     | 0     |
| S17-final-viral-combined_k141_115931]] | [full]   | 1928   | No  | NA    | 0  | 1 | Low-quality    | Genome-fragment | NA | 2.13  | 0     |
| S17-final-viral-combined_k141_1007]]   | [full]   | 1928   | No  | NA    | 0  | 1 | Low-quality    | Genome-fragment | NA | 1.58  | 0     |
| S12-final-viral-combined_k141_270790]] | [full]   | 1928   | No  | NA    | 1  | 0 | Low-quality    | Genome-fragment | NA | 2.69  | 0     |
| S7-final-viral-combined_k141_99474]]   | [full]   | 2203   | No  | NA    | 0  | 2 | Not-determined | Genome-fragment | NA | 0     | 0     |
| S7-final-viral-combined_k141_202482]]  | [full]   | 3215   | No  | NA    | 0  | 2 | Not-determined | Genome-fragment | NA | 0     | 0     |
| S7-final-viral-combined_k141_130465]]  | [full]   | 5117   | No  | NA    | 0  | 3 | Not-determined | Genome-fragment | NA | 0     | 0     |
| S12-final-viral-combined_k141_246928]] | [full]   | 1928   | No  | NA    | 0  | 1 | Low-quality    | Genome-fragment | NA | 1.33  | 0     |
| S7-final-viral-combined_k141_58953]]   | [full]   | 1309   | No  | NA    | 0  | 0 | Not-determined | Genome-fragment | NA | 0     | 0     |
| S7-final-viral-combined_k141_212340]]  | [full]   | 2956   | No  | NA    | 0  | 1 | Not-determined | Genome-fragment | NA | 0     | 0     |
| S7-final-viral-combined_k141_17879]]   | [full]   | 1834   | No  | NA    | 0  | 3 | Not-determined | Genome-fragment | NA | 0     | 0     |
| S4_k141_99803                          |          | 1928   | No  | NA    | 0  | 0 | Low-quality    | Genome-fragment | NA | 1.87  | 0     |
| S1-final-viral-combined_k141_106061]]  | [full]   | 1929   | No  | NA    | 0  | 1 | Low-quality    | Genome-fragment | NA | 1.57  | 0     |
| S7-final-viral-combined_k141_242166]]  | [full]   | 2200   | No  | NA    | 0  | 0 | Not-determined | Genome-fragment | NA | 0     | 0     |
| S7-final-viral-combined_k141_17886]]   | [full]   | 2442   | No  | NA    | 0  | 0 | Not-determined | Genome-fragment | NA | 0     | 0     |
| S7-final-viral-combined_k141_38810]]   | [full]   | 3992   | No  | NA    | 0  | 2 | Not-determined | Genome-fragment | NA | 0     | 0     |
| S7-final-viral-combined_k141_26857]]   | [full]   | 2383   | No  | NA    | 0  | 4 | Not-determined | Genome-fragment | NA | 0     | 0     |
| S7-final-viral-combined_k141_88839]]   | [full]   | 1420   | No  | NA    | 0  | 1 | Not-determined | Genome-fragment | NA | 0     | 0     |
| S7-final-viral-combined_k141_88985]]   | [full]   | 6859   | No  | NA    | 0  | 3 | Not-determined | Genome-fragment | NA | 0     | 0     |
| S5-final-viral-combined_k141_207904]]  | [full]   | 1929   | No  | NA    | 0  | 1 | Low-quality    | Genome-fragment | NA | 1.7   | 0     |
| S7-final-viral-combined_k141_220505]]  | [full]   | 1092   | No  | NA    | 0  | 1 | Not-determined | Genome-fragment | NA | 1.39  | 0     |
| S7-final-viral-combined_k141_167053]]  | [full]   | 1929   | No  | NA    | 0  | 2 | Low-quality    | Genome-fragment | NA | 0     | 0     |
| S7-final-viral-combined_k141_161485]]  | [full]   | 1177   | No  | NA    | 0  | 0 | Not-determined | Genome-fragment | NA | 0     | 0     |
| S7-final-viral-combined_k141_59029]]   | [full]   | 2257   | No  | NA    | 0  | 2 | Not-determined | Genome-fragment | NA | 0     | 0     |
| S7-final-viral-combined_k141_232189]]  | [full]   | 1929   | No  | NA    | 0  | 0 | Low-quality    | Genome-fragment | NA | 6.32  | 0     |
| S7-final-viral-combined_k141_371275]]  | [full]   | 2402   | No  | NA    | 0  | 2 | Not-determined | Genome-fragment | NA | 0     | 0     |
| S12_k141_269814                        |          | 1929   | No  | NA    | 1  | 0 | Low-quality    | Genome-fragment | NA | 15.36 | 0     |
| S8_k141_13061                          |          | 1929   | No  | NA    | 0  | 0 | Low-quality    | Genome-fragment | NA | 1.21  | 0     |
| S7-final-viral-combined_k141_99543]]   | [full]   | 12218  | No  | NA    | 0  | 0 | Not-determined | Genome-fragment | NA | 0     | 0     |
| S17_k141_154448                        |          | 1930   | No  | NA    | 0  | 0 | Low-quality    | Genome-fragment | NA | 4.36  | 0     |
| S7-final-viral-combined_k141_242223]]  | [full]   | 3529   | No  | NA    | 0  | 0 | Not-determined | Genome-fragment | NA | 0     | 0     |
| S2-final-viral-combined_k141_144235]]  | [full]   | 1930   | No  | NA    | 0  | 0 | Low-quality    | Genome-fragment | NA | 1.97  | 0     |
| S7-final-viral-combined_k141_17588]]   | [full]   | 1931   | No  | NA    | 1  | 0 | Low-quality    | Genome-fragment | NA | 3.52  | 0     |
| S3_k141_22662                          |          | 1931   | No  | NA    | 0  | 0 | Low-quality    | Genome-fragment | NA | 1.88  | 0     |
| S7-final-viral-combined_k141_192119]]  | [full]   | 4079   | No  | NA    | 0  | 1 | Not-determined | Genome-fragment | NA | 0     | 0     |
| S7-final-viral-combined_k141_130567]]  | [full]   | 7312</ |     |       |    |   |                |                 |    |       |       |



|                                        |          |       |    |    |    |   |                |                 |    |       |   |
|----------------------------------------|----------|-------|----|----|----|---|----------------|-----------------|----|-------|---|
| 58-final-viral-combined_k141_191505]]  | [full]   | 1934  | No | NA | 0  | 0 | Low-quality    | Genome-fragment | NA | 4.72  | 0 |
| 57-final-viral-combined_k141_182033]]  | [full]   | 4067  | No | NA | 0  | 0 | Not-determined | Genome-fragment | NA | 0     | 0 |
| 58-final-viral-combined_k141_145872]]  | [full]   | 1934  | No | NA | 1  | 0 | Low-quality    | Genome-fragment | NA | 3.37  | 0 |
| 58-final-viral-combined_k141_89290]]   | [full]   | 1934  | No | NA | 0  | 0 | Low-quality    | Genome-fragment | NA | 5.13  | 0 |
| 57-final-viral-combined_k141_59280]]   | [full]   | 1858  | No | NA | 0  | 1 | Not-determined | Genome-fragment | NA | 0     | 0 |
| 57-final-viral-combined_k141_232799]]  | [full]   | 8122  | No | NA | 0  | 7 | Not-determined | Genome-fragment | NA | 0     | 0 |
| 57-final-viral-combined_k141_89160]]   | [full]   | 5145  | No | NA | 0  | 3 | Not-determined | Genome-fragment | NA | 0     | 0 |
| 58-final-viral-combined_k141_89378]]   | [full]   | 1934  | No | NA | 1  | 0 | Low-quality    | Genome-fragment | NA | 2.63  | 0 |
| 57-final-viral-combined_k141_212550]]  | [full]   | 1350  | No | NA | 0  | 2 | Not-determined | Genome-fragment | NA | 0     | 0 |
| 57-final-viral-combined_k141_192417]]  | [full]   | 2424  | No | NA | 0  | 2 | Not-determined | Genome-fragment | NA | 0     | 0 |
| 57-final-viral-combined_k141_89181]]   | [full]   | 3554  | No | NA | 0  | 3 | Not-determined | Genome-fragment | NA | 0     | 0 |
| 57-final-viral-combined_k141_182080]]  | [full]   | 3349  | No | NA | 0  | 2 | Not-determined | Genome-fragment | NA | 0     | 0 |
| 57-final-viral-combined_k141_109337]]  | [full]   | 2777  | No | NA | 0  | 0 | Not-determined | Genome-fragment | NA | 0     | 0 |
| 57-final-viral-combined_k141_182091]]  | [full]   | 1599  | No | NA | 0  | 1 | Not-determined | Genome-fragment | NA | 0     | 0 |
| 57-final-viral-combined_k141_49101]]   | [full]   | 2880  | No | NA | 0  | 0 | Not-determined | Genome-fragment | NA | 0     | 0 |
| 57-final-viral-combined_k141_109350]]  | [full]   | 1741  | No | NA | 0  | 1 | Not-determined | Genome-fragment | NA | 0     | 0 |
| 57-final-viral-combined_k141_212608]]  | [full]   | 2148  | No | NA | 0  | 0 | Not-determined | Genome-fragment | NA | 0     | 0 |
| 57-final-viral-combined_k141_49138]]   | [full]   | 2498  | No | NA | 0  | 2 | Not-determined | Genome-fragment | NA | 0     | 0 |
| 51-final-viral-combined_k141_168424]]  | [full]   | 1935  | No | NA | 0  | 0 | Low-quality    | Genome-fragment | NA | 2.06  | 0 |
| 57-final-viral-combined_k141_192444]]  | [full]   | 1157  | No | NA | 0  | 0 | Not-determined | Genome-fragment | NA | 0     | 0 |
| 57-final-viral-combined_k141_182128]]  | [full]   | 2000  | No | NA | 0  | 3 | Not-determined | Genome-fragment | NA | 0     | 0 |
| 57-final-viral-combined_k141_240234]]  | [full]   | 2576  | No | NA | 0  | 1 | Not-determined | Genome-fragment | NA | 0     | 0 |
| 57-final-viral-combined_k141_109399]]  | [full]   | 2578  | No | NA | 0  | 0 | Not-determined | Genome-fragment | NA | 0     | 0 |
| 57-final-viral-combined_k141_49163]]   | [full]   | 1267  | No | NA | 0  | 2 | Not-determined | Genome-fragment | NA | 0     | 0 |
| 57-final-viral-combined_k141_78973]]   | [full]   | 3910  | No | NA | 0  | 2 | Not-determined | Genome-fragment | NA | 0     | 0 |
| 57_k141_59114                          |          | 1935  | No | NA | 0  | 0 | Low-quality    | Genome-fragment | NA | 1.84  | 0 |
| 57-final-viral-combined_k141_203058]]  | [full]   | 2233  | No | NA | 0  | 2 | Not-determined | Genome-fragment | NA | 0     | 0 |
| 57-final-viral-combined_k141_79002]]   | [full]   | 2824  | No | NA | 0  | 3 | Not-determined | Genome-fragment | NA | 0     | 0 |
| 57-final-viral-combined_k141_19176]]   | [full]   | 1460  | No | NA | 0  | 0 | Not-determined | Genome-fragment | NA | 0     | 0 |
| 57-final-viral-combined_k141_220853]]  | [full]   | 1486  | No | NA | 0  | 3 | Not-determined | Genome-fragment | NA | 0     | 0 |
| 517-final-viral-combined_k141_25954]]  | [full]   | 1935  | No | NA | 3  | 0 | Low-quality    | Genome-fragment | NA | 5.75  | 0 |
| 59-final-viral-combined_k141_78251]]   | [H2gene] | 1936  | No | NA | 1  | 0 | Low-quality    | Genome-fragment | NA | 4.81  | 0 |
| 57-final-viral-combined_k141_192514]]  | [full]   | 6535  | No | NA | 0  | 2 | Not-determined | Genome-fragment | NA | 0     | 0 |
| 57-final-viral-combined_k141_203124]]  | [full]   | 10655 | No | NA | 0  | 3 | Not-determined | Genome-fragment | NA | 0     | 0 |
| 57-final-viral-combined_k141_182186]]  | [full]   | 1683  | No | NA | 0  | 1 | Not-determined | Genome-fragment | NA | 0     | 0 |
| 511-final-viral-combined_k141_7647]]   | [full]   | 1936  | No | NA | 0  | 1 | Low-quality    | Genome-fragment | NA | 4.45  | 0 |
| 57-final-viral-combined_k141_39209]]   | [full]   | 1106  | No | NA | 0  | 2 | Not-determined | Genome-fragment | NA | 0     | 0 |
| 57-final-viral-combined_k141_89366]]   | [full]   | 2391  | No | NA | 0  | 0 | Not-determined | Genome-fragment | NA | 0     | 0 |
| 512-final-viral-combined_k141_216375]] | [full]   | 1936  | No | NA | 0  | 1 | Low-quality    | Genome-fragment | NA | 2.14  | 0 |
| 57-final-viral-combined_k141_220880]]  | [full]   | 5672  | No | NA | 0  | 4 | Not-determined | Genome-fragment | NA | 0     | 0 |
| 57-final-viral-combined_k141_233006]]  | [full]   | 4636  | No | NA | 0  | 2 | Not-determined | Genome-fragment | NA | 0     | 0 |
| 57-final-viral-combined_k141_233005]]  | [full]   | 1577  | No | NA | 0  | 0 | Not-determined | Genome-fragment | NA | 0     | 0 |
| 512-final-viral-combined_k141_250761]] | [full]   | 1936  | No | NA | 1  | 0 | Low-quality    | Genome-fragment | NA | 3.17  | 0 |
| 57-final-viral-combined_k141_59394]]   | [full]   | 2901  | No | NA | 0  | 2 | Not-determined | Genome-fragment | NA | 0     | 0 |
| 512-final-viral-combined_k141_83457]]  | [H2gene] | 1936  | No | NA | 1  | 0 | Low-quality    | Genome-fragment | NA | 46.52 | 0 |
| 57-final-viral-combined_k141_100089]]  | [full]   | 1378  | No | NA | 0  | 0 | Not-determined | Genome-fragment | NA | 0     | 0 |
| 52-final-viral-combined_k141_21591]]   | [full]   | 1936  | No | NA | 0  | 2 | Low-quality    | Genome-fragment | NA | 1.55  | 0 |
| 52-final-viral-combined_k141_120551]]  | [H2gene] | 1936  | No | NA | 1  | 0 | Low-quality    | Genome-fragment | NA | 3.21  | 0 |
| 58_k141_3039                           |          | 1936  | No | NA | 0  | 3 | Low-quality    | Genome-fragment | NA | 0.96  | 0 |
| 57-final-viral-combined_k141_59441]]   | [full]   | 1275  | No | NA | 0  | 1 | Not-determined | Genome-fragment | NA | 0     | 0 |
| 57-final-viral-combined_k141_18277]]   | [full]   | 1937  | No | NA | 0  | 2 | Not-determined | Genome-fragment | NA | 0     | 0 |
| 57-final-viral-combined_k141_233051]]  | [full]   | 1472  | No | NA | 0  | 2 | Not-determined | Genome-fragment | NA | 0     | 0 |
| 511-final-viral-combined_k141_289698]] | [H2gene] | 1937  | No | NA | 1  | 0 | Low-quality    | Genome-fragment | NA | 2.54  | 0 |
| 57-final-viral-combined_k141_18321]]   | [full]   | 1428  | No | NA | 0  | 0 | Not-determined | Genome-fragment | NA | 0     | 0 |
| 57-final-viral-combined_k141_79113]]   | [full]   | 1193  | No | NA | 0  | 1 | Not-determined | Genome-fragment | NA | 0     | 0 |
| 57-final-viral-combined_k141_18326]]   | [full]   | 2068  | No | NA | 0  | 0 | Not-determined | Genome-fragment | NA | 0     | 0 |
| 57-final-viral-combined_k141_59447]]   | [full]   | 1410  | No | NA | 0  | 0 | Not-determined | Genome-fragment | NA | 0     | 0 |
| 51-final-viral-combined_k141_253342]]  | [full]   | 1937  | No | NA | 0  | 2 | Low-quality    | Genome-fragment | NA | 1.3   | 0 |
| 57-final-viral-combined_k141_109604]]  | [full]   | 3303  | No | NA | 0  | 3 | Not-determined | Genome-fragment | NA | 0     | 0 |
| 57-final-viral-combined_k141_79159]]   | [full]   | 1739  | No | NA | 0  | 0 | Not-determined | Genome-fragment | NA | 0     | 0 |
| 52-final-viral-combined_k141_12277]]   | [full]   | 1937  | No | NA | 0  | 0 | Low-quality    | Genome-fragment | NA | 2.52  | 0 |
| 57-final-viral-combined_k141_182184]]  | [full]   | 1163  | No | NA | 0  | 1 | Not-determined | Genome-fragment | NA | 0     | 0 |
| 57-final-viral-combined_k141_18373]]   | [full]   | 1269  | No | NA | 0  | 1 | Not-determined | Genome-fragment | NA | 0     | 0 |
| 57-final-viral-combined_k141_59492]]   | [full]   | 1756  | No | NA | 0  | 1 | Not-determined | Genome-fragment | NA | 0     | 0 |
| 56_k141_10646                          |          | 1937  | No | NA | 0  | 2 | Low-quality    | Genome-fragment | NA | 1.08  | 0 |
| 57-final-viral-combined_k141_150782]]  | [full]   | 3643  | No | NA | 0  | 0 | Not-determined | Genome-fragment | NA | 0     | 0 |
| 51-final-viral-combined_k141_298027]]  | [full]   | 1938  | No | NA | 0  | 0 | Low-quality    | Genome-fragment | NA | 2.95  | 0 |
| 57-final-viral-combined_k141_8090]]    | [full]   | 4550  | No | NA | 0  | 3 | Not-determined | Genome-fragment | NA | 0     | 0 |
| 57-final-viral-combined_k141_242650]]  | [full]   | 2401  | No | NA | 0  | 0 | Not-determined | Genome-fragment | NA | 0     | 0 |
| 57-final-viral-combined_k141_242659]]  | [full]   | 1159  | No | NA | 0  | 0 | Not-determined | Genome-fragment | NA | 0     | 0 |
| 57-final-viral-combined_k141_79197]]   | [full]   | 4461  | No | NA | 0  | 2 | Not-determined | Genome-fragment | NA | 0     | 0 |
| 51-final-viral-combined_k141_88663]]   | [full]   | 1938  | No | NA | 0  | 0 | Low-quality    | Genome-fragment | NA | 1.81  | 0 |
| 51-final-viral-combined_k141_245020]]  | [full]   | 1938  | No | NA | 0  | 0 | Low-quality    | Genome-fragment | NA | 5.03  | 0 |
| 51_k141_319018                         |          | 1938  | No | NA | 0  | 1 | Low-quality    | Genome-fragment | NA | 3.24  | 0 |
| 517-final-viral-combined_k141_90886]]  | [full]   | 1938  | No | NA | 0  | 1 | Not-determined | Genome-fragment | NA | 2.22  | 0 |
| 57-final-viral-combined_k141_70260]]   | [full]   | 1938  | No | NA | 0  | 0 | Low-quality    | Genome-fragment | NA | 4.92  | 0 |
| 57-final-viral-combined_k141_102022]]  | [full]   | 1644  | No | NA | 0  | 0 | Not-determined | Genome-fragment | NA | 0     | 0 |
| 57-final-viral-combined_k141_242714]]  | [full]   | 3769  | No | NA | 0  | 1 | Not-determined | Genome-fragment | NA | 0     | 0 |
| 57-final-viral-combined_k141_120951]]  | [full]   | 2066  | No | NA | 0  | 1 | Not-determined | Genome-fragment | NA | 0     | 0 |
| 57-final-viral-combined_k141_27100]]   | [full]   | 1383  | No | NA | 0  | 0 | Not-determined | Genome-fragment | NA | 0     | 0 |
| 57-final-viral-combined_k141_242742]]  | [full]   | 3138  | No | NA | 0  | 0 | Not-determined | Genome-fragment | NA | 0     | 0 |
| 57-final-viral-combined_k141_109751]]  | [full]   | 4289  | No | NA | 0  | 0 | Not-determined | Genome-fragment | NA | 0     | 0 |
| 517-final-viral-combined_k141_215094]] | [full]   | 1938  | No | NA | 0  | 0 | Low-quality    | Genome-fragment | NA | 3.03  | 0 |
| 57-final-viral-combined_k141_162078]]  | [full]   | 2407  | No | NA | 0  | 1 | Not-determined | Genome-fragment | NA | 0     | 0 |
| 52-final-viral-combined_k141_219376]]  | [full]   | 1938  | No | NA | 0  | 0 | Low-quality    | Genome-fragment | NA | 3.17  | 0 |
| 57-final-viral-combined_k141_120982]]  | [full]   | 1407  | No | NA | 0  | 1 | Not-determined | Genome-fragment | NA | 0     | 0 |
| 57-final-viral-combined_k141_140359]]  | [full]   | 1198  | No | NA | 0  | 0 | Not-determined | Genome-fragment | NA | 0     | 0 |
| 52_k141_213622                         |          | 1938  | No | NA | 0  | 0 | Low-quality    | Genome-fragment | NA | 3.85  | 0 |
| 57-final-viral-combined_k141_233270]]  | [full]   | 2037  | No | NA | 0  | 1 | Not-determined | Genome-fragment | NA | 0     | 0 |
| 54_k141_26442                          |          | 1938  | No | NA | 2  | 0 | Low-quality    | Genome-fragment | NA | 1.12  | 0 |
| 57-final-viral-combined_k141_70027]]   | [full]   | 1449  | No | NA | 0  | 1 | Not-determined | Genome-fragment | NA | 0     | 0 |
| 57-final-viral-combined_k141_70029]]   | [full]   | 6492  | No | NA | 0  | 0 | Not-determined | Genome-fragment | NA | 0     | 0 |
| 58-final-viral-combined_k141_165265]]  | [full]   | 1938  | No | NA | 0  | 1 | Low-quality    | Genome-fragment | NA | 1     | 0 |
| 511-final-viral-combined_k141_235106]] | [full]   | 1940  | No | NA | 0  | 1 | Low-quality    | Genome-fragment | NA | 3.41  | 0 |
| 57-final-viral-combined_k141_192469]]  | [full]   | 4787  | No | NA | 0  | 0 | Not-determined | Genome-fragment | NA | 0     | 0 |
| 55-final-viral-combined_k141_211975]]  | [full]   | 1940  | No | NA | 0  | 0 | Low-quality    | Genome-fragment | NA | 4.63  | 0 |
| 57-final-viral-combined_k141_70052]]   | [full]   | 1042  | No | NA | 0  | 0 | Not-determined | Genome-fragment | NA | 0     | 0 |
| 57-final-viral-combined_k141_140412]]  | [full]   | 6529  | No | NA | 0  | 5 | Not-determined | Genome-fragment | NA | 0     | 0 |
| 57-final-viral-combined_k141_130931]]  | [full]   | 1975  | No | NA | 0  | 0 | Not-determined | Genome-fragment | NA | 0     | 0 |
| 57-final-viral-combined_k141_210481]]  | [full]   | 1940  | No | NA | 2  | 0 | Low-quality    | Genome-fragment | NA | 4.06  | 0 |
| 57-final-viral-combined_k141_196561]]  | [full]   | 1629  | No | NA | 0  | 1 | Not-determined | Genome-fragment | NA | 0     | 0 |
| 57-final-viral-combined_k141_140439]]  | [full]   | 2080  | No | NA | 0  | 0 | Not-determined | Genome-fragment | NA | 0     | 0 |
| 57-final-viral-combined_k141_8226]]    | [full]   | 2684  | No | NA | 0  | 3 | Not-determined | Genome-fragment | NA | 0     | 0 |
| 57-final-viral-combined_k141_182495]]  | [full]   | 2236  | No | NA | 0  | 1 | Not-determined | Genome-fragment | NA | 0     | 0 |
| 517-final-viral-combined_k141_89219]]  | [full]   | 1940  | No | NA | 0  | 0 | Low-quality    | Genome-fragment | NA | 6.76  | 0 |
| 512-final-viral-combined_k141_351571]] | [full]   | 1940  | No | NA | 1  | 0 | Low-quality    | Genome-fragment | NA | 2.55  | 0 |
| 57-final-viral-combined_k141_121062]]  | [full]   | 29002 | No | NA | 12 | 0 | Medium-quality | Genome-fragment | NA | 74.07 | 0 |
| 57-final-viral-combined_k141_59693]]   | [full]   | 1198  | No | NA | 0  | 0 | Not-determined | Genome-fragment | NA | 0     | 0 |
| 57-final-viral-combined_k141_192931]]  | [full]   | 1215  | No | NA | 0  | 0 | Not-determined | Genome-fragment | NA | 0     | 0 |
| 57-final-viral-combined_k141_121093]]  | [full]   | 1148  | No | NA | 0  | 0 | Not-determined | Genome-fragment | NA | 0     | 0 |
| 52_k141_134129                         |          | 1940  | No | NA | 0  | 2 | Low-quality    | Genome-fragment | NA | 0.72  | 0 |
| 57-final-viral-combined_k141_89496]]   | [full]   | 10214 | No | NA | 0  | 1 | Not-determined | Genome-fragment | NA | 0     | 0 |
| 57-final-viral-combined_k141_49678]]   | [full]   | 2620  | No | NA | 0  | 2 | Not-determined | Genome-fragment | NA | 0     | 0 |
| 58-final-viral-combined_k141_54178]]   | [full]   | 1940  | No | NA | 0  | 2 | Low-quality    | Genome-fragment | NA | 1.23  | 0 |
| 57-final-viral-combined_k141_150918]]  | [full]   | 1098  | No | NA | 0  | 0 | Not-determined | Genome-fragment | NA | 0     | 0 |
| 57-final-viral-combined_k141_27244]]   | [full]   | 1796  | No | NA | 0  | 1 | Not-determined | Genome-fragment | NA | 0     | 0 |
| 59_k141_115407                         |          | 1941  | No | NA | 0  | 0 | Low-quality    | Genome-fragment | NA | 4.59  | 0 |
| 57-final-viral-combined_k141_212949]]  | [full]   | 2108  | No | NA | 0  | 0 | Not-determined | Genome-fragment | NA | 0     | 0 |
| 57-final-viral-combined_k141_182554]]  | [full]   | 6181  | No | NA | 0  | 0 | Not-determined | Genome-fragment | NA | 0     | 0 |
| 57-final-viral-combined_k141_192992]]  | [full]   | 1471  | No | NA | 0  | 0 | Not-determined | Genome-fragment | NA | 0     | 0 |
| 57-final-viral-combined_k141_497       |          |       |    |    |    |   |                |                 |    |       |   |



|                                      |          |      |     |      |   |   |                |                 |    |      |       |
|--------------------------------------|----------|------|-----|------|---|---|----------------|-----------------|----|------|-------|
| 57-final-viral-combined_k141_213151  | [full]   | 3962 | No  | NA   | 0 | 2 | Not-determined | Genome-fragment | NA |      | 0     |
| 58-final-viral-combined_k141_210497  | [full]   | 1945 | No  | NA   | 0 | 1 | Low-quality    | Genome-fragment | NA | 1.69 | 0     |
| 57-final-viral-combined_k141_70420   | [full]   | 4005 | No  | NA   | 0 | 2 | Not-determined | Genome-fragment | NA |      | 0     |
| 511-final-viral-combined_k141_8356   | [full]   | 1946 | No  | NA   | 0 | 0 | Low-quality    | Genome-fragment | NA | 4.16 | 0     |
| 57-final-viral-combined_k141_18594   | [full]   | 2413 | No  | NA   | 0 | 2 | Not-determined | Genome-fragment | NA |      | 0     |
| 57-final-viral-combined_k141_59934   | [full]   | 5142 | No  | NA   | 0 | 5 | Not-determined | Genome-fragment | NA |      | 0     |
| 57-final-viral-combined_k141_79416   | [full]   | 7890 | No  | NA   | 0 | 4 | Not-determined | Genome-fragment | NA |      | 0     |
| 57-final-viral-combined_k141_140767  | [full]   | 1084 | No  | NA   | 0 | 0 | Not-determined | Genome-fragment | NA |      | 0     |
| 511-final-viral-combined_k141_105178 | [full]   | 1946 | No  | NA   | 0 | 0 | Low-quality    | Genome-fragment | NA | 5.09 | 0     |
| 511-final-viral-combined_k141_52634  | [full]   | 1946 | No  | NA   | 0 | 2 | Low-quality    | Genome-fragment | NA | 0.83 | 0     |
| 51-final-viral-combined_k141_331457  | [full]   | 1946 | No  | NA   | 0 | 0 | Low-quality    | Genome-fragment | NA | 3.41 | 0     |
| 57-final-viral-combined_k141_22146   | [full]   | 2140 | No  | NA   | 0 | 1 | Not-determined | Genome-fragment | NA | 0    | 0     |
| 57-final-viral-combined_k141_151233  | [full]   | 6937 | No  | NA   | 0 | 1 | Not-determined | Genome-fragment | NA |      | 0     |
| 57-final-viral-combined_k141_27352   | [full]   | 1520 | No  | NA   | 0 | 1 | Not-determined | Genome-fragment | NA |      | 0     |
| 57-final-viral-combined_k141_59951   | [full]   | 1416 | No  | NA   | 0 | 1 | Not-determined | Genome-fragment | NA |      | 0     |
| 57-final-viral-combined_k141_100601  | [full]   | 1014 | No  | NA   | 0 | 0 | Not-determined | Genome-fragment | NA |      | 0     |
| 57-final-viral-combined_k141_110169  | [full]   | 7583 | No  | NA   | 0 | 2 | Not-determined | Genome-fragment | NA |      | 0     |
| 57-final-viral-combined_k141_131285  | [full]   | 1705 | No  | NA   | 0 | 0 | Not-determined | Genome-fragment | NA |      | 0     |
| 55-final-viral-combined_k141_180583  | [full]   | 1946 | No  | NA   | 0 | 2 | Low-quality    | Genome-fragment | NA | 1.57 | 0     |
| 55-final-viral-combined_k141_135942  | [full]   | 1946 | No  | NA   | 1 | 0 | Low-quality    | Genome-fragment | NA | 1.73 | 0     |
| 57-final-viral-combined_k141_307577  | [full]   | 1946 | No  | NA   | 1 | 0 | Not-determined | Genome-fragment | NA | 3.12 | 0     |
| 57-final-viral-combined_k141_89807   | [full]   | 9773 | No  | NA   | 0 | 8 | Not-determined | Genome-fragment | NA |      | 0     |
| 57-final-viral-combined_k141_193340  | [full]   | 1101 | No  | NA   | 0 | 1 | Not-determined | Genome-fragment | NA |      | 0     |
| 57-final-viral-combined_k141_89878   | [full]   | 5248 | No  | NA   | 0 | 3 | Not-determined | Genome-fragment | NA |      | 0     |
| 57-final-viral-combined_k141_213315  | [full]   | 1287 | No  | NA   | 0 | 1 | Not-determined | Genome-fragment | NA |      | 0     |
| 57-final-viral-combined_k141_120303  | [full]   | 1946 | No  | NA   | 1 | 0 | Low-quality    | Genome-fragment | NA | 2.18 | 0     |
| 57-final-viral-combined_k141_233829  | [full]   | 1221 | No  | NA   | 0 | 0 | Not-determined | Genome-fragment | NA |      | 0     |
| 57-final-viral-combined_k141_140812  | [full]   | 5417 | No  | NA   | 0 | 5 | Not-determined | Genome-fragment | NA |      | 0     |
| 512-final-viral-combined_k141_149060 | [full]   | 1946 | No  | NA   | 0 | 0 | Low-quality    | Genome-fragment | NA | 4.26 | 0     |
| 57-final-viral-combined_k141_110254  | [full]   | 3338 | No  | NA   | 0 | 1 | Not-determined | Genome-fragment | NA |      | 0     |
| 58-final-viral-combined_k141_116135  | [full]   | 1946 | No  | NA   | 0 | 0 | Low-quality    | Genome-fragment | NA | 3.99 | 0     |
| 58-final-viral-combined_k141_26467   | [full]   | 1946 | No  | NA   | 0 | 0 | Low-quality    | Genome-fragment | NA | 1.27 | 0     |
| 57-final-viral-combined_k141_50153   | [full]   | 2172 | No  | NA   | 0 | 1 | Not-determined | Genome-fragment | NA |      | 0     |
| 511-final-viral-combined_k141_185644 | [full]   | 1947 | No  | NA   | 0 | 0 | Low-quality    | Genome-fragment | NA | 2.61 | 0     |
| 57-final-viral-combined_k141_60109   | [full]   | 4549 | No  | NA   | 0 | 5 | Not-determined | Genome-fragment | NA |      | 0     |
| 511_k141_294577                      | [full]   | 1947 | No  | NA   | 0 | 1 | Low-quality    | Genome-fragment | NA | 0.72 | 0     |
| 57-final-viral-combined_k141_24826   | [full]   | 1947 | No  | NA   | 0 | 0 | Low-quality    | Genome-fragment | NA | 0.88 | 0     |
| 57-final-viral-combined_k141_121616  | [full]   | 5733 | No  | NA   | 0 | 1 | Not-determined | Genome-fragment | NA |      | 0     |
| 57-final-viral-combined_k141_103144  | [full]   | 1947 | No  | NA   | 0 | 0 | Low-quality    | Genome-fragment | NA | 3.71 | 0     |
| 57-final-viral-combined_k141_84305   | [full]   | 1947 | No  | NA   | 0 | 1 | Low-quality    | Genome-fragment | NA | 1.42 | 0     |
| 517-final-viral-combined_k141_69127  | [full]   | 1947 | No  | NA   | 1 | 0 | Low-quality    | Genome-fragment | NA | 3.16 | 0     |
| 517-final-viral-combined_k141_239624 | [full]   | 1947 | No  | NA   | 0 | 2 | Low-quality    | Genome-fragment | NA | 2.65 | 0     |
| 57-final-viral-combined_k141_8743    | [full]   | 3804 | No  | NA   | 0 | 2 | Not-determined | Genome-fragment | NA |      | 0     |
| 57-final-viral-combined_k141_172424  | [full]   | 2874 | No  | NA   | 0 | 1 | Not-determined | Genome-fragment | NA |      | 0     |
| 512-final-viral-combined_k141_240226 | [full]   | 1947 | No  | NA   | 0 | 0 | Low-quality    | Genome-fragment | NA | 3.18 | 0     |
| 54-final-viral-combined_k141_1864    | [full]   | 1947 | No  | NA   | 0 | 0 | Low-quality    | Genome-fragment | NA | 6.09 | 0     |
| 57-final-viral-combined_k141_213393  | [full]   | 5118 | No  | NA   | 0 | 1 | Not-determined | Genome-fragment | NA |      | 0     |
| 57-final-viral-combined_k141_151383  | [full]   | 1720 | No  | NA   | 0 | 2 | Not-determined | Genome-fragment | NA |      | 0     |
| 54-final-viral-combined_k141_164572  | [full]   | 1947 | No  | NA   | 0 | 1 | Low-quality    | Genome-fragment | NA | 0.52 | 0     |
| 57-final-viral-combined_k141_204204  | [full]   | 2388 | No  | NA   | 0 | 1 | Not-determined | Genome-fragment | NA |      | 0     |
| 58-final-viral-combined_k141_6389    | [full]   | 1947 | No  | NA   | 0 | 2 | Low-quality    | Genome-fragment | NA | 1.89 | 0     |
| 58_k141_266602                       | [full]   | 1947 | No  | NA   | 0 | 2 | Low-quality    | Genome-fragment | NA |      | 0     |
| 51-final-viral-combined_k141_333984  | [full]   | 1948 | Yes | 927  | 1 | 1 | Low-quality    | Genome-fragment | NA | 2.36 | 52.41 |
| 51_k141_257450                       | [full]   | 1948 | No  | NA   | 0 | 1 | Low-quality    | Genome-fragment | NA | 0.17 | 0     |
| 57-final-viral-combined_k141_221648  | [full]   | 3769 | No  | NA   | 0 | 0 | Not-determined | Genome-fragment | NA |      | 0     |
| 57-final-viral-combined_k141_221651  | [full]   | 2164 | No  | NA   | 0 | 0 | Not-determined | Genome-fragment | NA |      | 0     |
| 57-final-viral-combined_k141_140867  | [full]   | 1524 | No  | NA   | 0 | 0 | Not-determined | Genome-fragment | NA |      | 0     |
| 57-final-viral-combined_k141_110327  | [full]   | 2968 | No  | NA   | 0 | 4 | Not-determined | Genome-fragment | NA |      | 0     |
| 57-final-viral-combined_k141_89967   | [full]   | 2850 | No  | NA   | 0 | 1 | Not-determined | Genome-fragment | NA |      | 0     |
| 53-final-viral-combined_k141_30643   | [full]   | 1948 | No  | NA   | 0 | 2 | Low-quality    | Genome-fragment | NA | 1.56 | 0     |
| 57-final-viral-combined_k141_131492  | [full]   | 2833 | No  | NA   | 0 | 0 | Not-determined | Genome-fragment | NA | 2.35 | 0     |
| 517-final-viral-combined_k141_57578  | [full]   | 1948 | No  | NA   | 0 | 0 | Low-quality    | Genome-fragment | NA |      | 0     |
| 57-final-viral-combined_k141_70618   | [full]   | 2301 | No  | NA   | 2 | 1 | Not-determined | Genome-fragment | NA |      | 0     |
| 517-final-viral-combined_k141_266257 | [full]   | 1948 | No  | NA   | 1 | 0 | Low-quality    | Genome-fragment | NA | 4.42 | 0     |
| 57-final-viral-combined_k141_213432  | [full]   | 2216 | No  | NA   | 0 | 1 | Not-determined | Genome-fragment | NA |      | 0     |
| 57-final-viral-combined_k141_243290  | [full]   | 2102 | No  | NA   | 0 | 2 | Not-determined | Genome-fragment | NA |      | 0     |
| 57-final-viral-combined_k141_193486  | [full]   | 3072 | No  | NA   | 0 | 2 | Not-determined | Genome-fragment | NA |      | 0     |
| 57-final-viral-combined_k141_100812  | [full]   | 2489 | No  | NA   | 0 | 3 | Not-determined | Genome-fragment | NA |      | 0     |
| 57-final-viral-combined_k141_121704  | [full]   | 2418 | No  | NA   | 0 | 2 | Not-determined | Genome-fragment | NA |      | 0     |
| 57-final-viral-combined_k141_40043   | [full]   | 3201 | No  | NA   | 0 | 3 | Not-determined | Genome-fragment | NA |      | 0     |
| 57-final-viral-combined_k141_8771    | [full]   | 6795 | No  | NA   | 0 | 0 | Not-determined | Genome-fragment | NA |      | 0     |
| 57-final-viral-combined_k141_40054   | [full]   | 1436 | No  | NA   | 0 | 0 | Not-determined | Genome-fragment | NA |      | 0     |
| 57-final-viral-combined_k141_131548  | [full]   | 2063 | No  | NA   | 0 | 1 | Not-determined | Genome-fragment | NA |      | 0     |
| 57-final-viral-combined_k141_213451  | [full]   | 1357 | No  | NA   | 0 | 1 | Not-determined | Genome-fragment | NA |      | 0     |
| 57-final-viral-combined_k141_40009   | [full]   | 1228 | No  | NA   | 0 | 2 | Not-determined | Genome-fragment | NA |      | 0     |
| 57-final-viral-combined_k141_40077   | [full]   | 1677 | No  | NA   | 0 | 0 | Not-determined | Genome-fragment | NA |      | 0     |
| 57-final-viral-combined_k141_90035   | [full]   | 2458 | No  | NA   | 0 | 2 | Not-determined | Genome-fragment | NA |      | 0     |
| 512-final-viral-combined_k141_82104  | [H2gene] | 1948 | No  | NA   | 1 | 0 | Low-quality    | Genome-fragment | NA | 4.16 | 0     |
| 57-final-viral-combined_k141_213466  | [full]   | 3075 | No  | NA   | 0 | 1 | Not-determined | Genome-fragment | NA |      | 0     |
| 512_k141_384283                      | [full]   | 1948 | No  | NA   | 1 | 0 | Low-quality    | Genome-fragment | NA | 4.31 | 0     |
| 54-final-viral-combined_k141_5404    | [full]   | 1948 | No  | NA   | 0 | 3 | Low-quality    | Genome-fragment | NA | 3.38 | 0     |
| 54_k141_5131                         | [full]   | 1948 | No  | NA   | 0 | 1 | Low-quality    | Genome-fragment | NA | 0.67 | 0     |
| 57-final-viral-combined_k141_172484  | [full]   | 3006 | No  | NA   | 0 | 3 | Not-determined | Genome-fragment | NA |      | 0     |
| 511-final-viral-combined_k141_256928 | [full]   | 1949 | Yes | 1475 | 2 | 1 | Low-quality    | Genome-fragment | NA | 1.81 | 24.32 |
| 57-final-viral-combined_k141_217498  | [full]   | 3263 | No  | NA   | 0 | 2 | Not-determined | Genome-fragment | NA |      | 0     |
| 57-final-viral-combined_k141_131596  | [full]   | 2644 | No  | NA   | 0 | 0 | Not-determined | Genome-fragment | NA |      | 0     |
| 57-final-viral-combined_k141_243361  | [full]   | 1059 | No  | NA   | 0 | 0 | Not-determined | Genome-fragment | NA |      | 0     |
| 53-final-viral-combined_k141_264     | [full]   | 1949 | No  | NA   | 1 | 0 | Low-quality    | Genome-fragment | NA | 4.45 | 0     |
| 57-final-viral-combined_k141_141061  | [full]   | 1607 | No  | NA   | 0 | 0 | Not-determined | Genome-fragment | NA |      | 0     |
| 57_k141_228058                       | [full]   | 1949 | No  | NA   | 0 | 1 | Low-quality    | Genome-fragment | NA | 4.79 | 0     |
| 57-final-viral-combined_k141_79694   | [full]   | 1933 | No  | NA   | 0 | 2 | Not-determined | Genome-fragment | NA |      | 0     |
| 57-final-viral-combined_k141_182976  | [full]   | 2536 | No  | NA   | 0 | 0 | Low-quality    | Genome-fragment | NA |      | 0     |
| 57-final-viral-combined_k141_110434  | [full]   | 2651 | No  | NA   | 0 | 3 | Not-determined | Genome-fragment | NA |      | 0     |
| 57-final-viral-combined_k141_213526  | [full]   | 5473 | No  | NA   | 0 | 2 | Not-determined | Genome-fragment | NA |      | 0     |
| 57-final-viral-combined_k141_241024  | [full]   | 1444 | No  | NA   | 0 | 2 | Not-determined | Genome-fragment | NA |      | 0     |
| 57-final-viral-combined_k141_141024  | [full]   | 1019 | No  | NA   | 0 | 1 | Not-determined | Genome-fragment | NA |      | 0     |
| 52-final-viral-combined_k141_151032  | [full]   | 1949 | No  | NA   | 0 | 0 | Low-quality    | Genome-fragment | NA | 1.2  | 0     |
| 57-final-viral-combined_k141_151504  | [full]   | 1589 | No  | NA   | 0 | 1 | Not-determined | Genome-fragment | NA |      | 0     |
| 57-final-viral-combined_k141_131651  | [full]   | 2044 | No  | NA   | 0 | 0 | Not-determined | Genome-fragment | NA |      | 0     |
| 57-final-viral-combined_k141_79714   | [full]   | 2815 | No  | NA   | 0 | 2 | Not-determined | Genome-fragment | NA |      | 0     |
| 54-final-viral-combined_k141_10304   | [full]   | 1949 | No  | NA   | 0 | 0 | Low-quality    | Genome-fragment | NA | 3.75 | 0     |
| 57-final-viral-combined_k141_101019  | [full]   | 1095 | No  | NA   | 0 | 0 | Not-determined | Genome-fragment | NA |      | 0     |
| 51-final-viral-combined_k141_262184  | [full]   | 1950 | No  | NA   | 2 | 0 | Low-quality    | Genome-fragment | NA | 3.34 | 0     |
| 51_k141_204333                       | [full]   | 1950 | No  | NA   | 0 | 2 | Low-quality    | Genome-fragment | NA | 0.62 | 0     |
| 55-final-viral-combined_k141_198602  | [full]   | 1950 | No  | NA   | 0 | 0 | Low-quality    | Genome-fragment | NA | 1.99 | 0     |
| 57-final-viral-combined_k141_130965  | [full]   | 1950 | No  | NA   | 1 | 0 | Low-quality    | Genome-fragment | NA | 1.12 | 0     |
| 57-final-viral-combined_k141_100972  | [full]   | 1012 | No  | NA   | 0 | 1 | Not-determined | Genome-fragment | NA |      | 0     |
| 57-final-viral-combined_k141_131685  | [full]   | 2917 | No  | NA   | 0 | 2 | Not-determined | Genome-fragment | NA | 7.78 | 0     |
| 517-final-viral-combined_k141_56811  | [full]   | 1950 | No  | NA   | 0 | 0 | Low-quality    | Genome-fragment | NA |      | 0     |
| 52-final-viral-combined_k141_7924    | [full]   | 1950 | No  | NA   | 0 | 2 | Low-quality    | Genome-fragment | NA | 2.22 | 0     |
| 511-final-viral-combined_k141_172081 | [full]   | 1951 | No  | NA   | 0 | 0 | Low-quality    | Genome-fragment | NA | 3.27 | 0     |
| 57-final-viral-combined_k141_50425   | [full]   | 1606 | No  | NA   | 0 | 1 | Not-determined | Genome-fragment | NA |      | 0     |
| 51_k141_192021                       | [full]   | 1951 | No  | NA   | 1 | 0 | Low-quality    | Genome-fragment | NA | 1.79 | 0     |
| 57-final-viral-combined_k141_193693  | [full]   | 1559 | No  | NA   | 0 | 3 | Not-determined | Genome-fragment | NA |      | 0     |
| 52_k141_122905                       | [full]   | 1951 | No  | NA   | 0 | 0 | Low-quality    | Genome-fragment | NA | 0.72 | 0     |
| 57-final-viral-combined_k141_162708  | [full]   | 1211 | No  | NA   | 0 | 1 | Not-determined | Genome-fragment | NA |      | 0     |
| 57-final-viral-combined_k141_151593  | [full]   | 4386 | No  | NA   | 0 | 2 | Not-determined | Genome-fragment | NA |      | 0     |
| 57-final-viral-combined_k141_22810   | [full]   | 2168 | No  | NA   | 0 | 0 | Low-quality    | Genome-fragment | NA | 1.17 | 0     |
| 56-final-viral-combined_k141_38557   | [full]   | 1951 | No  | NA   | 2 | 0 | Not-determined | Genome-fragment | NA |      | 0     |
| 56_k141_26831                        | [full]   | 1951 | No  | NA   | 2 | 0 | Low-quality    | Genome-fragment | NA | 2.32 | 0     |
| 57-final-viral-combined_k141_243484  | [full]   | 2699 | No  | NA   | 0 | 1 | Not-determined | Genome-fragment | NA |      | 0     |
| 57-final-viral-combined_k141_122807  | [full]   | 8349 | No  | NA   | 0 | 0 | Low-quality    | Genome-fragment | NA |      | 0     |
| 57-final-viral-combined_k141_50517   | [full]   | 1717 | No  |      |   |   |                |                 |    |      |       |



|                                       |            |       |     |      |       |    |                |                 |       |       |
|---------------------------------------|------------|-------|-----|------|-------|----|----------------|-----------------|-------|-------|
| 57-final-viral-combined_k141_003931   | [full]     | 19692 | No  | NA   | 9     | 1  | Medium-quality | Genome-fragment | 53.3  | 0     |
| 512_k141_14279                        |            | 1955  | No  | NA   | 2     | 0  | Low-quality    | Genome-fragment | 6.02  | 0     |
| 52-final-viral-combined_k141_819731   | [full]     | 1955  | No  | NA   | 0     | 1  | Low-quality    | Genome-fragment | 3.45  | 0     |
| 57-final-viral-combined_k141_183408   | [full]     | 3412  | No  | NA   | 0     | 4  | Not-determined | Genome-fragment | NA    | 0     |
| 57-final-viral-combined_k141_89981    | [full]     | 3902  | No  | NA   | 0     | 3  | Not-determined | Genome-fragment | NA    | 0     |
| 58-final-viral-combined_k141_124631   | [full]     | 1956  | No  | NA   | 0     | 0  | Low-quality    | Genome-fragment | 5.1   | 0     |
| 55_k141_156360                        |            | 1956  | No  | NA   | 2     | 0  | Low-quality    | Genome-fragment | 4.83  | 0     |
| 57-final-viral-combined_k141_904351   | [full]     | 1320  | No  | NA   | 0     | 0  | Not-determined | Genome-fragment | NA    | 0     |
| 57-final-viral-combined_k141_90091    | [full]     | 1680  | No  | NA   | 1     | 1  | Not-determined | Genome-fragment | NA    | 0     |
| 57-final-viral-combined_k141_1834251  | [full]     | 1807  | No  | NA   | 0     | 1  | Not-determined | Genome-fragment | NA    | 0     |
| 517-final-viral-combined_k141_305691  | [full]     | 1956  | No  | NA   | 0     | 0  | Low-quality    | Genome-fragment | 1.23  | 0     |
| 58-final-viral-combined_k141_63531    | [full]     | 1956  | No  | NA   | 0     | 1  | Low-quality    | Genome-fragment | 3.93  | 0     |
| 57-final-viral-combined_k141_90141    | [full]     | 2926  | No  | NA   | 0     | 1  | Not-determined | Genome-fragment | NA    | 0     |
| 511-final-viral-combined_k141_2516951 | [full]     | 1957  | No  | NA   | 1     | 0  | Low-quality    | Genome-fragment | 4.25  | 0     |
| 51_k141_185992                        |            | 1957  | No  | NA   | 1     | 0  | Low-quality    | Genome-fragment | 3.39  | 0     |
| 57-final-viral-combined_k141_1011741  | [full]     | 2254  | No  | NA   | 0     | 0  | Not-determined | Genome-fragment | NA    | 0     |
| 57-final-viral-combined_k141_1011861  | [full]     | 1804  | No  | NA   | 0     | 0  | Not-determined | Genome-fragment | NA    | 0     |
| 57-final-viral-combined_k141_1834701  | [full]     | 3317  | No  | NA   | 0     | 3  | Not-determined | Genome-fragment | NA    | 0     |
| 57-final-viral-combined_k141_1219501  | [full]     | 1024  | No  | NA   | 0     | 1  | Not-determined | Genome-fragment | NA    | 0     |
| 57-final-viral-combined_k141_1109741  | [full]     | 2216  | No  | NA   | 0     | 3  | Not-determined | Genome-fragment | NA    | 0     |
| 57-final-viral-combined_k141_1551121  | [full]     | 1957  | No  | NA   | 0     | 0  | Low-quality    | Genome-fragment | 1.33  | 0     |
| 57-final-viral-combined_k141_1219821  | [full]     | 4416  | No  | NA   | 0     | 3  | Not-determined | Genome-fragment | NA    | 0     |
| 57-final-viral-combined_k141_1729671  | [full]     | 1041  | No  | NA   | 0     | 0  | Not-determined | Genome-fragment | NA    | 0     |
| 57-final-viral-combined_k141_1835011  | [full]     | 5580  | No  | NA   | 0     | 4  | Not-determined | Genome-fragment | NA    | 0     |
| 57_k141_99419                         |            | 1957  | No  | NA   | 0     | 0  | Low-quality    | Genome-fragment | 2.8   | 0     |
| 512-final-viral-combined_k141_3930181 | [full]     | 1957  | No  | NA   | 0     | 0  | Low-quality    | Genome-fragment | 4.25  | 0     |
| 54_k141_145555                        |            | 1957  | No  | NA   | 0     | 2  | Low-quality    | Genome-fragment | 5     | 0     |
| 57-final-viral-combined_k141_711961   | [full]     | 2649  | No  | NA   | 0     | 0  | Not-determined | Genome-fragment | NA    | 0     |
| 57-final-viral-combined_k141_1311981  | [full]     | 5347  | No  | NA   | 0     | 2  | Not-determined | Genome-fragment | NA    | 0     |
| 57-final-viral-combined_k141_1012461  | [full]     | 2181  | No  | NA   | 0     | 1  | Not-determined | Genome-fragment | NA    | 0     |
| 57-final-viral-combined_k141_1518651  | [full]     | 2974  | No  | NA   | 0     | 0  | Not-determined | Genome-fragment | NA    | 0     |
| 57-final-viral-combined_k141_1012561  | [full]     | 2657  | No  | NA   | 0     | 0  | Not-determined | Genome-fragment | NA    | 0     |
| 56_k141_54858                         |            | 1957  | No  | NA   | 1     | 0  | Low-quality    | Genome-fragment | 4.74  | 0     |
| 51-final-viral-combined_k141_2519261  | [full]     | 1958  | Yes |      | 1     | 1  | Low-quality    | Genome-fragment | 0.23  | 57.71 |
| 57-final-viral-combined_k141_1831541  | [full]     | 1793  | No  | NA   | 1     | 1  | Not-determined | Genome-fragment | NA    | 0     |
| 57-final-viral-combined_k141_1110041  | [full]     | 68619 | Yes | 828  | 64243 | 23 | High-quality   | Genome-fragment | 100   | 6.38  |
| 57-final-viral-combined_k141_1110071  | [full]     | 5676  | No  | NA   | 0     | 1  | Not-determined | Genome-fragment | NA    | 0     |
| 57-final-viral-combined_k141_405451   | [full]     | 1617  | No  | NA   | 0     | 0  | Not-determined | Genome-fragment | NA    | 0     |
| 57-final-viral-combined_k141_1216541  | [full]     | 1958  | No  | NA   | 0     | 0  | Low-quality    | Genome-fragment | 5.58  | 0     |
| 57-final-viral-combined_k141_1519391  | [full]     | 1921  | No  | NA   | 0     | 0  | Not-determined | Genome-fragment | NA    | 0     |
| 57-final-viral-combined_k141_713001   | [full]     | 3236  | No  | NA   | 0     | 1  | Not-determined | Genome-fragment | NA    | 0     |
| 57-final-viral-combined_k141_800491   | [full]     | 2212  | No  | NA   | 0     | 1  | Not-determined | Genome-fragment | NA    | 0     |
| 57_k141_83265                         |            | 1958  | No  | NA   | 0     | 0  | Low-quality    | Genome-fragment | 2.94  | 0     |
| 57-final-viral-combined_k141_906841   | [full]     | 1462  | No  | NA   | 0     | 0  | Not-determined | Genome-fragment | NA    | 0     |
| 517-final-viral-combined_k141_124411  | [full]     | 1958  | No  | NA   | 1     | 0  | Low-quality    | Genome-fragment | 4.44  | 0     |
| 512-final-viral-combined_k141_2444801 | [full]     | 1958  | No  | NA   | 0     | 2  | Low-quality    | Genome-fragment | 2.26  | 0     |
| 57-final-viral-combined_k141_1413841  | [full]     | 2462  | No  | NA   | 0     | 2  | Not-determined | Genome-fragment | NA    | 0     |
| 54-final-viral-combined_k141_1361341  | [full]     | 1958  | Yes | 666  | 1     | 1  | Low-quality    | Genome-fragment | 1.55  | 65.99 |
| 57-final-viral-combined_k141_607931   | [full]     | 2410  | No  | NA   | 0     | 0  | Not-determined | Genome-fragment | NA    | 0     |
| 57-final-viral-combined_k141_1413981  | [full]     | 1817  | No  | NA   | 0     | 1  | Not-determined | Genome-fragment | NA    | 0     |
| 57-final-viral-combined_k141_1836381  | [full]     | 1363  | No  | NA   | 0     | 0  | Not-determined | Genome-fragment | NA    | 0     |
| 57-final-viral-combined_k141_1412991  | [full]     | 1008  | No  | NA   | 0     | 0  | Not-determined | Genome-fragment | NA    | 0     |
| 57-final-viral-combined_k141_1414091  | [full]     | 1117  | No  | NA   | 0     | 1  | Not-determined | Genome-fragment | NA    | 0     |
| 57-final-viral-combined_k141_1520491  | [full]     | 6607  | No  | NA   | 0     | 4  | Not-determined | Genome-fragment | NA    | 0     |
| 58-final-viral-combined_k141_333631   | [full]     | 1959  | No  | NA   | 0     | 0  | Low-quality    | Genome-fragment | 1.35  | 0     |
| 57-final-viral-combined_k141_192641   | [full]     | 1704  | No  | NA   | 0     | 0  | Not-determined | Genome-fragment | NA    | 0     |
| 511-final-viral-combined_k141_967521  | [full]     | 1959  | No  | NA   | 1     | 0  | Low-quality    | Genome-fragment | 3.3   | 0     |
| 57-final-viral-combined_k141_907371   | [full]     | 7805  | No  | NA   | 0     | 2  | Not-determined | Genome-fragment | NA    | 0     |
| 511-final-viral-combined_k141_2344381 | [full]     | 1959  | No  | NA   | 0     | 1  | Low-quality    | Genome-fragment | 4.19  | 0     |
| 51-final-viral-combined_k141_723331   | [full]     | 1959  | No  | NA   | 0     | 0  | Low-quality    | Genome-fragment | 4.48  | 0     |
| 51-final-viral-combined_k141_106411   | [full]     | 1959  | No  | NA   | 0     | 3  | Low-quality    | Genome-fragment | 0.89  | 0     |
| 57-final-viral-combined_k141_1111061  | [full]     | 6218  | No  | NA   | 0     | 6  | Not-determined | Genome-fragment | NA    | 0     |
| 57-final-viral-combined_k141_1520701  | [full]     | 4121  | No  | NA   | 0     | 2  | Not-determined | Genome-fragment | NA    | 0     |
| 53-final-viral-combined_k141_1354501  | [12genome] | 1959  | No  | NA   | 2     | 0  | Low-quality    | Genome-fragment | 5.17  | 0     |
| 512-final-viral-combined_k141_1164691 | [full]     | 1959  | No  | NA   | 0     | 0  | Low-quality    | Genome-fragment | 2.76  | 0     |
| 57-final-viral-combined_k141_406541   | [full]     | 2706  | No  | NA   | 0     | 0  | Not-determined | Genome-fragment | NA    | 0     |
| 512_k141_193143                       |            | 1959  | No  | NA   | 0     | 0  | Low-quality    | Genome-fragment | 1.22  | 0     |
| 58-final-viral-combined_k141_856071   | [full]     | 1960  | No  | NA   | 4     | 0  | Low-quality    | Genome-fragment | 4.86  | 0     |
| 511-final-viral-combined_k141_952531  | [full]     | 1960  | No  | NA   | 0     | 1  | Low-quality    | Genome-fragment | 2.47  | 0     |
| 51-final-viral-combined_k141_2183461  | [full]     | 1960  | No  | NA   | 2     | 0  | Low-quality    | Genome-fragment | 4.52  | 0     |
| 51-final-viral-combined_k141_2110681  | [full]     | 1960  | No  | NA   | 1     | 0  | Low-quality    | Genome-fragment | 5.05  | 0     |
| 57-final-viral-combined_k141_1837151  | [full]     | 5268  | No  | NA   | 3     | 1  | Not-determined | Genome-fragment | NA    | 0     |
| 57-final-viral-combined_k141_1414731  | [full]     | 5288  | No  | NA   | 0     | 5  | Not-determined | Genome-fragment | NA    | 0     |
| 517-final-viral-combined_k141_1293451 | [full]     | 1960  | No  | NA   | 1     | 0  | Low-quality    | Genome-fragment | 4.94  | 0     |
| 57-final-viral-combined_k141_11121521 | [full]     | 4592  | No  | NA   | 0     | 2  | Not-determined | Genome-fragment | NA    | 0     |
| 512-final-viral-combined_k141_1361181 | [full]     | 1960  | No  | NA   | 0     | 0  | Low-quality    | Genome-fragment | 0.59  | 0     |
| 57-final-viral-combined_k141_907281   | [full]     | 23541 | No  | NA   | 13    | 0  | Medium-quality | Genome-fragment | 58.6  | 0     |
| 512-final-viral-combined_k141_222231  | [full]     | 1960  | No  | NA   | 3     | 0  | Low-quality    | Genome-fragment | 3.37  | 0     |
| 57-final-viral-combined_k141_1223361  | [full]     | 3266  | No  | NA   | 0     | 3  | Not-determined | Genome-fragment | NA    | 0     |
| 512-final-viral-combined_k141_968541  | [full]     | 1960  | No  | NA   | 0     | 2  | Low-quality    | Genome-fragment | 0.64  | 0     |
| 57-final-viral-combined_k141_1837711  | [full]     | 2327  | No  | NA   | 0     | 0  | Not-determined | Genome-fragment | NA    | 0     |
| 57-final-viral-combined_k141_1837371  | [full]     | 2269  | No  | NA   | 0     | 1  | Not-determined | Genome-fragment | NA    | 0     |
| 512-final-viral-combined_k141_497311  | [full]     | 1960  | Yes | 1436 | 1     | 1  | Low-quality    | Genome-fragment | 2.91  | 26.73 |
| 57-final-viral-combined_k141_407421   | [full]     | 1874  | No  | NA   | 0     | 2  | Not-determined | Genome-fragment | NA    | 0     |
| 58-final-viral-combined_k141_2207441  | [full]     | 1960  | No  | NA   | 0     | 0  | Low-quality    | Genome-fragment | 4.27  | 0     |
| 57-final-viral-combined_k141_802511   | [full]     | 1049  | No  | NA   | 0     | 0  | Not-determined | Genome-fragment | NA    | 0     |
| 58-final-viral-combined_k141_867621   | [full]     | 1961  | No  | NA   | 0     | 0  | Low-quality    | Genome-fragment | 1.32  | 0     |
| 51-final-viral-combined_k141_818431   | [full]     | 1961  | No  | NA   | 0     | 2  | Low-quality    | Genome-fragment | 2.66  | 0     |
| 57-final-viral-combined_k141_24881    | [full]     | 6487  | No  | NA   | 0     | 2  | Not-determined | Genome-fragment | NA    | 0     |
| 57-final-viral-combined_k141_2223791  | [full]     | 2671  | No  | NA   | 0     | 1  | Not-determined | Genome-fragment | NA    | 0     |
| 57-final-viral-combined_k141_1014511  | [full]     | 1332  | No  | NA   | 0     | 1  | Not-determined | Genome-fragment | NA    | 0     |
| 57-final-viral-combined_k141_1952111  | [full]     | 4029  | No  | NA   | 0     | 3  | Not-determined | Genome-fragment | NA    | 0     |
| 57-final-viral-combined_k141_1415931  | [full]     | 3086  | No  | NA   | 0     | 1  | Not-determined | Genome-fragment | NA    | 0     |
| 57-final-viral-combined_k141_610291   | [full]     | 12153 | No  | NA   | 0     | 2  | Not-determined | Genome-fragment | NA    | 0     |
| 51-final-viral-combined_k141_2898731  | [full]     | 1961  | No  | NA   | 1     | 2  | Low-quality    | Genome-fragment | 1.43  | 0     |
| 55-final-viral-combined_k141_221881   | [full]     | 1961  | No  | NA   | 1     | 0  | Low-quality    | Genome-fragment | 4.18  | 0     |
| 57-final-viral-combined_k141_1014801  | [full]     | 2343  | No  | NA   | 0     | 1  | Not-determined | Genome-fragment | NA    | 0     |
| 512-final-viral-combined_k141_3055821 | [full]     | 1961  | No  | NA   | 0     | 1  | Low-quality    | Genome-fragment | 1.18  | 0     |
| 512-final-viral-combined_k141_434111  | [full]     | 1961  | No  | NA   | 0     | 0  | Low-quality    | Genome-fragment | 2.34  | 0     |
| 57-final-viral-combined_k141_1112351  | [full]     | 1285  | No  | NA   | 0     | 1  | Not-determined | Genome-fragment | NA    | 0     |
| 57-final-viral-combined_k141_509601   | [full]     | 1465  | No  | NA   | 0     | 1  | Not-determined | Genome-fragment | NA    | 0     |
| 57-final-viral-combined_k141_407791   | [full]     | 30775 | No  | NA   | 8     | 0  | Medium-quality | Genome-fragment | 60.92 | 0     |
| 57-final-viral-combined_k141_2224331  | [full]     | 2630  | No  | NA   | 0     | 0  | Not-determined | Genome-fragment | NA    | 0     |
| 54-final-viral-combined_k141_1414231  | [full]     | 1961  | No  | NA   | 1     | 0  | Low-quality    | Genome-fragment | 3.93  | 0     |
| 57-final-viral-combined_k141_611461   | [full]     | 1960  | No  | NA   | 0     | 0  | Not-determined | Genome-fragment | NA    | 0     |
| 57-final-viral-combined_k141_1112641  | [full]     | 7452  | No  | NA   | 0     | 5  | Not-determined | Genome-fragment | NA    | 0     |
| 56_k141_128656                        |            | 1961  | No  | NA   | 0     | 0  | Low-quality    | Genome-fragment | 2.1   | 0     |
| 57-final-viral-combined_k141_1414261  | [full]     | 1179  | No  | NA   | 0     | 1  | Not-determined | Genome-fragment | NA    | 0     |
| 57-final-viral-combined_k141_1113031  | [full]     | 1809  | No  | NA   | 0     | 0  | Not-determined | Genome-fragment | NA    | 0     |
| 58-final-viral-combined_k141_2001941  | [full]     | 1961  | No  | NA   | 0     | 0  | Low-quality    | Genome-fragment | 4.27  | 0     |
| 57-final-viral-combined_k141_1319401  | [full]     | 2901  | No  | NA   | 0     | 2  | Not-determined | Genome-fragment | NA    | 0     |
| 511-final-viral-combined_k141_286251  | [full]     | 1962  | No  | NA   | 0     | 0  | Low-quality    | Genome-fragment | 4.79  | 0     |
| 57-final-viral-combined_k141_1417041  | [full]     | 1931  | No  | NA   | 0     | 0  | Not-determined | Genome-fragment | NA    | 0     |
| 57-final-viral-combined_k141_1015811  | [full]     | 5434  | No  | NA   | 0     | 0  | Not-determined | Genome-fragment | NA    | 0     |
| 511-final-viral-combined_k141_294671  | [full]     | 1962  | No  | NA   | 1     | 0  | Low-quality    | Genome-fragment | 2.94  | 0     |
| 51-final-viral-combined_k141_3337691  | [full]     | 1962  | No  | NA   | 2     | 0  | Low-quality    | Genome-fragment | 5.03  | 0     |
| 57-final-viral-combined_k141_510001   | [full]     | 1544  | No  | NA   | 0     | 0  | Not-determined | Genome-fragment | NA    | 0     |
| 57-final-viral-combined_k141_1015951  | [full]     | 4770  | No  | NA   | 0     | 2  | Not-determined | Genome-fragment | NA    | 0     |
| 57-final-viral-combined_k141_818951   | [12genome] | 1962  | No  | NA   | 1     | 0  | Low-quality    | Genome-fragment | 4.69  | 0     |
| 57-final-viral-combined_k141_2225061  | [full]     | 1721  | No  | NA   | 0     | 2  | Not-determined | Genome-fragment | NA    | 0     |
| 517_k141_127870                       |            | 1962  | No  | NA   | 0     | 0  | Low-quality    | Genome-fragment | 0.9   | 0     |
| 56-final-viral-combined_k141_262041   | [full]     | 1962  | No  | NA   | 0     | 0  | Low-quality    | Genome-fragment | 2.33  | 0     |
| 57-final-viral-combined_k141_1319951  | [full]     | 1376  | No  | NA   | 0     | 2  | Not-determined | Genome-fragment | NA    | 0     |
| 58-final-viral-combined_k141_1015951  | [full]     | 1962  | No  | NA   | 1     | 0  | Low-quality    | Genome-fragment | 2.65  | 0     |
| 51-final-viral-combined_k141_3313001  | [full]     | 1963  | No  | NA   | 0     | 0  | Low-quality    | Genome-fragment | 2.64  | 0     |
| 57-final-viral-combined_k141_2225731  | [full]     | 2223  | No  | NA   | 0     | 0  | Not-determined | Genome-fragment | NA    | 0     |
| 51-final-viral-combined_k141_3814181  | [full]     | 1963  | No  | NA   | 1     | 0  | Low-quality    | Genome-fragment | 4.07  | 0     |
| 57-final-viral-com                    |            |       |     |      |       |    |                |                 |       |       |



|                                                  |       |     |       |   |                |                 |                 |       |       |
|--------------------------------------------------|-------|-----|-------|---|----------------|-----------------|-----------------|-------|-------|
| 53-final-viral-combined_k141_59730]] [full       | 1967  | No  | NA    | 0 | 1              | Low-quality     | Genome-fragment | 1.12  | 0     |
| 57-final-viral-combined_k141_80740]] [full       | 1459  | No  | NA    | 0 | 1              | Not-determined  | Genome-fragment | NA    | 0     |
| 57-final-viral-combined_k141_11872]] [full       | 5800  | No  | NA    | 0 | 0              | Low-quality     | Genome-fragment | NA    | 0     |
| 55-final-viral-combined_k141_52879]] [full       | 1967  | No  | NA    | 0 | 0              | Low-quality     | Genome-fragment | 3.55  | 0     |
| 57-final-viral-combined_k141_91415]] [full       | 2413  | No  | NA    | 0 | 1              | Not-determined  | Genome-fragment | NA    | 0     |
| 55_k141_11848                                    | 1967  | No  | NA    | 0 | 1              | Low-quality     | Genome-fragment | 2.01  | 0     |
| 57-final-viral-combined_k141_132363]] [full      | 1137  | No  | NA    | 0 | 0              | Not-determined  | Genome-fragment | NA    | 0     |
| 57-final-viral-combined_k141_132381]] [full      | 2980  | No  | NA    | 0 | 4              | Not-determined  | Genome-fragment | NA    | 0     |
| 57-final-viral-combined_k141_223913]] [full      | 1860  | No  | NA    | 0 | 1              | Not-determined  | Genome-fragment | NA    | 0     |
| 517-final-viral-combined_k141_18213]] [full      | 1967  | No  | NA    | 0 | 2              | Low-quality     | Genome-fragment | 0.94  | 0     |
| 57-final-viral-combined_k141_80796]] [full       | 5480  | No  | NA    | 0 | 1              | Not-determined  | Genome-fragment | NA    | 0     |
| 57-final-viral-combined_k141_244000]] [full      | 3421  | No  | NA    | 0 | 1              | Not-determined  | Genome-fragment | NA    | 0     |
| 512-final-viral-combined_k141_133044]] [full     | 1967  | No  | NA    | 3 | 0              | Low-quality     | Genome-fragment | 5.6   | 0     |
| 57-final-viral-combined_k141_244016]] [full      | 4697  | No  | NA    | 0 | 0              | Not-determined  | Genome-fragment | NA    | 0     |
| 57-final-viral-combined_k141_222945]] [full      | 8617  | No  | NA    | 0 | 1              | Not-determined  | Genome-fragment | NA    | 0     |
| 57-final-viral-combined_k141_234541]] [full      | 1768  | No  | NA    | 0 | 2              | Not-determined  | Genome-fragment | NA    | 0     |
| 57-final-viral-combined_k141_244049]] [full      | 1210  | No  | NA    | 0 | 1              | Not-determined  | Genome-fragment | NA    | 0     |
| 512-final-viral-combined_k141_247057]] [H2gene   | 1967  | No  | NA    | 1 | 0              | Low-quality     | Genome-fragment | 5.46  | 0     |
| 57-final-viral-combined_k141_153369]] [full      | 1491  | No  | NA    | 0 | 0              | Not-determined  | Genome-fragment | NA    | 0     |
| 57-final-viral-combined_k141_142224]] [full      | 4592  | No  | NA    | 0 | 3              | Not-determined  | Genome-fragment | NA    | 0     |
| 52-final-viral-combined_k141_105049]] [full      | 1967  | No  | NA    | 0 | 1              | Low-quality     | Genome-fragment | 0.47  | 0     |
| 57-final-viral-combined_k141_142239]] [full      | 14512 | No  | NA    | 0 | 5              | Not-determined  | Genome-fragment | NA    | 0     |
| 57-final-viral-combined_k141_20143]] [full       | 3323  | No  | NA    | 0 | 4              | Not-determined  | Genome-fragment | NA    | 0     |
| 57-final-viral-combined_k141_20145]] [full       | 1614  | No  | NA    | 0 | 0              | Not-determined  | Genome-fragment | NA    | 0     |
| 58-final-viral-combined_k141_232282]] [full      | 1967  | No  | NA    | 0 | 0              | Low-quality     | Genome-fragment | 5.58  | 0     |
| 51-final-viral-combined_k141_177145]] [full      | 1968  | No  | NA    | 1 | 0              | Low-quality     | Genome-fragment | 5.58  | 0     |
| 51_k141_267777                                   | 1968  | No  | NA    | 0 | 0              | Low-quality     | Genome-fragment | 5.96  | 0     |
| 57-final-viral-combined_k141_80946]] [full       | 1238  | No  | NA    | 0 | 2              | Not-determined  | Genome-fragment | NA    | 0     |
| 57-final-viral-combined_k141_244166]] [full      | 2517  | No  | NA    | 0 | 0              | Not-determined  | Genome-fragment | NA    | 0     |
| 51_k141_114467                                   | 1968  | No  | NA    | 0 | 0              | Low-quality     | Genome-fragment | 3.5   | 0     |
| 55_k141_206724                                   | 1968  | No  | NA    | 0 | 0              | Low-quality     | Genome-fragment | 1.13  | 0     |
| 57-final-viral-combined_k141_152958]] [full      | 2459  | No  | NA    | 2 | Not-determined | Genome-fragment | NA              | 0     |       |
| 517-final-viral-combined_k141_245271]] [full     | 1968  | No  | NA    | 0 | 2              | Low-quality     | Genome-fragment | 3.69  | 0     |
| 57-final-viral-combined_k141_164054]] [full      | 1968  | No  | NA    | 0 | 0              | Low-quality     | Genome-fragment | 4.72  | 0     |
| 57-final-viral-combined_k141_10184]] [full       | 6036  | No  | NA    | 0 | 5              | Not-determined  | Genome-fragment | NA    | 0     |
| 512-final-viral-combined_k141_395085]] [full     | 1968  | No  | NA    | 0 | 0              | Low-quality     | Genome-fragment | 5     | 0     |
| 57-final-viral-combined_k141_152991]] [full      | 2053  | No  | NA    | 0 | 1              | Not-determined  | Genome-fragment | NA    | 0     |
| 57-final-viral-combined_k141_153006]] [full      | 2818  | No  | NA    | 0 | 0              | Not-determined  | Genome-fragment | NA    | 0     |
| 57-final-viral-combined_k141_153029]] [full      | 1073  | No  | NA    | 0 | 0              | Not-determined  | Genome-fragment | NA    | 0     |
| 57-final-viral-combined_k141_28709]] [full       | 13955 | No  | NA    | 0 | 9              | Not-determined  | Genome-fragment | NA    | 0     |
| 57-final-viral-combined_k141_23349]] [full       | 1131  | No  | NA    | 0 | 2              | Not-determined  | Genome-fragment | NA    | 0     |
| 54-final-viral-combined_k141_27348]] [full       | 1968  | No  | NA    | 0 | 0              | Low-quality     | Genome-fragment | 5.31  | 0     |
| 511-final-viral-combined_k141_70175]] [full      | 1969  | No  | NA    | 0 | 0              | Low-quality     | Genome-fragment | 3.53  | 0     |
| 57-final-viral-combined_k141_28739]] [full       | 1949  | No  | NA    | 0 | 0              | Not-determined  | Genome-fragment | NA    | 0     |
| 57-final-viral-combined_k141_23345]] [full       | 1428  | No  | NA    | 1 | 1              | Not-determined  | Genome-fragment | NA    | 0     |
| 57-final-viral-combined_k141_244215]] [full      | 1111  | No  | NA    | 0 | 0              | Not-determined  | Genome-fragment | NA    | 0     |
| 57-final-viral-combined_k141_20328]] [full       | 2758  | No  | NA    | 0 | 0              | Not-determined  | Genome-fragment | NA    | 0     |
| 53-final-viral-combined_k141_28998]] [full       | 1969  | No  | NA    | 0 | 1              | Low-quality     | Genome-fragment | 3.78  | 0     |
| 57-final-viral-combined_k141_28834]] [full       | 3665  | No  | NA    | 0 | 0              | Not-determined  | Genome-fragment | NA    | 0     |
| 53-final-viral-combined_k141_12837]] [full       | 1969  | No  | NA    | 1 | 0              | Low-quality     | Genome-fragment | 2.23  | 0     |
| 517-final-viral-combined_k141_37093]] [full      | 1969  | No  | NA    | 0 | 1              | Low-quality     | Genome-fragment | 0.88  | 0     |
| 517-final-viral-combined_k141_49516]] [full      | 1969  | No  | NA    | 0 | 2              | Low-quality     | Genome-fragment | 2.36  | 0     |
| 57-final-viral-combined_k141_20396]] [full       | 3654  | No  | NA    | 0 | 0              | Not-determined  | Genome-fragment | NA    | 0     |
| 57-final-viral-combined_k141_142501]] [full      | 1796  | No  | NA    | 0 | 2              | Not-determined  | Genome-fragment | NA    | 0     |
| 57-final-viral-combined_k141_21650]] [full       | 1283  | No  | NA    | 0 | 1              | Not-determined  | Genome-fragment | NA    | 0     |
| 57-final-viral-combined_k141_142517]] [full      | 1104  | No  | NA    | 0 | 2              | Not-determined  | Genome-fragment | NA    | 0     |
| 512-final-viral-combined_k141_218151]] [full     | 1969  | No  | NA    | 0 | 1              | Low-quality     | Genome-fragment | 3.3   | 0     |
| 57-final-viral-combined_k141_51767]] [full       | 4603  | No  | NA    | 0 | 4              | Not-determined  | Genome-fragment | NA    | 0.15  |
| 512-final-viral-combined_k141_206464]] [full     | 1969  | Yes | 186   | 0 | 1              | Low-quality     | Genome-fragment | 90.55 | 0     |
| 57-final-viral-combined_k141_244282]] [full      | 2399  | No  | NA    | 0 | 2              | Not-determined  | Genome-fragment | NA    | 0     |
| 57-final-viral-combined_k141_142657]] [full      | 2328  | No  | NA    | 0 | 2              | Not-determined  | Genome-fragment | NA    | 0     |
| 52-final-viral-combined_k141_186269]] [H2gene    | 1969  | No  | NA    | 1 | 0              | Low-quality     | Genome-fragment | 4.86  | 0     |
| 52_k141_199254                                   | 1969  | No  | NA    | 0 | 2              | Low-quality     | Genome-fragment | 0.72  | 0     |
| 57-final-viral-combined_k141_244332]] [full      | 2873  | No  | NA    | 0 | 2              | Not-determined  | Genome-fragment | NA    | 0     |
| 57-final-viral-combined_k141_142766]] [full      | 1991  | No  | NA    | 0 | 0              | Not-determined  | Genome-fragment | NA    | 0     |
| 58-final-viral-combined_k141_252529]] [full      | 1969  | No  | NA    | 1 | 0              | Low-quality     | Genome-fragment | 4.79  | 0     |
| 57-final-viral-combined_k141_29152]] [full       | 1700  | No  | NA    | 0 | 0              | Not-determined  | Genome-fragment | NA    | 0     |
| 51_k141_338349                                   | 1970  | No  | NA    | 0 | 0              | Low-quality     | Genome-fragment | 1.79  | 0     |
| 52-final-viral-combined_k141_164310]] [full      | 1970  | No  | NA    | 1 | 0              | Low-quality     | Genome-fragment | 1.46  | 0     |
| 57-final-viral-combined_k141_81330]] [full       | 2505  | No  | NA    | 0 | 3              | Not-determined  | Genome-fragment | NA    | 0     |
| 54_k141_5523                                     | 1970  | No  | NA    | 1 | 0              | Low-quality     | Genome-fragment | 5.59  | 0     |
| 57-final-viral-combined_k141_142781]] [full      | 3350  | No  | NA    | 0 | 3              | Not-determined  | Genome-fragment | NA    | 0     |
| 57-final-viral-combined_k141_81370]] [full       | 1859  | No  | NA    | 0 | 0              | Not-determined  | Genome-fragment | NA    | 0     |
| 57-final-viral-combined_k141_29211]] [full       | 1023  | No  | NA    | 0 | 0              | Not-determined  | Genome-fragment | NA    | 0     |
| 57-final-viral-combined_k141_21820]] [full       | 1171  | No  | NA    | 0 | 1              | Not-determined  | Genome-fragment | NA    | 0     |
| 57-final-viral-combined_k141_244396]] [full      | 2986  | No  | NA    | 0 | 3              | Not-determined  | Genome-fragment | NA    | 0     |
| 511-final-viral-combined_k141_223739]] [full     | 1971  | No  | NA    | 2 | 0              | Low-quality     | Genome-fragment | 4.25  | 0     |
| 51-final-viral-combined_k141_314986]] [full      | 1971  | No  | NA    | 1 | 0              | Low-quality     | Genome-fragment | 1.75  | 0     |
| 51-final-viral-combined_k141_335001]] [full      | 1971  | No  | NA    | 1 | 0              | Low-quality     | Genome-fragment | 2.21  | 0     |
| 57-final-viral-combined_k141_142945]] [full      | 1386  | No  | NA    | 0 | 0              | Not-determined  | Genome-fragment | NA    | 0     |
| 512-final-viral-combined_k141_295158]] [full     | 1971  | No  | NA    | 1 | 0              | Low-quality     | Genome-fragment | NA    | 0     |
| 57-final-viral-combined_k141_244512]] [full      | 12658 | No  | NA    | 0 | 9              | Not-determined  | Genome-fragment | NA    | 0     |
| 57-final-viral-combined_k141_223752]] [full      | 1402  | No  | NA    | 0 | 1              | Not-determined  | Genome-fragment | NA    | 0     |
| 57-final-viral-combined_k141_223781]] [full      | 1211  | No  | NA    | 0 | 0              | Not-determined  | Genome-fragment | NA    | 0     |
| 58-final-viral-combined_k141_25221]] [full       | 1971  | No  | NA    | 0 | 0              | Low-quality     | Genome-fragment | 4.2   | 0     |
| 57-final-viral-combined_k141_223938]] [full      | 2812  | No  | NA    | 0 | 1              | Not-determined  | Genome-fragment | NA    | 0     |
| 58-final-viral-combined_k141_132977]] [full      | 1971  | No  | NA    | 0 | 0              | Low-quality     | Genome-fragment | 5.56  | 0     |
| 57-final-viral-combined_k141_29525]] [full       | 1546  | No  | NA    | 0 | 0              | Not-determined  | Genome-fragment | NA    | 0     |
| 511-final-viral-combined_k141_231501]] [full     | 1972  | No  | NA    | 0 | 0              | Low-quality     | Genome-fragment | 2.85  | 0     |
| 51-final-viral-combined_k141_288028]] [full      | 1972  | No  | NA    | 0 | 0              | Low-quality     | Genome-fragment | 4.15  | 0     |
| 51-final-viral-combined_k141_140875]] [full      | 1972  | No  | NA    | 0 | 1              | Low-quality     | Genome-fragment | 1.73  | 0     |
| 57-final-viral-combined_k141_299451]] [full      | 1213  | No  | NA    | 0 | 0              | Not-determined  | Genome-fragment | NA    | 0     |
| 57-final-viral-combined_k141_224199]] [full      | 2113  | No  | NA    | 0 | 2              | Not-determined  | Genome-fragment | NA    | 0     |
| 517-k141_226673                                  | 1972  | No  | NA    | 0 | 1              | Low-quality     | Genome-fragment | 2.74  | 0     |
| 512-final-viral-combined_k141_92341]] [full      | 1972  | No  | NA    | 0 | 0              | Low-quality     | Genome-fragment | 5.25  | 0     |
| 57-final-viral-combined_k141_244760]] [full      | 3143  | No  | NA    | 0 | 1              | Not-determined  | Genome-fragment | NA    | 0     |
| 52-final-viral-combined_k141_107291]] [full      | 1972  | No  | NA    | 0 | 0              | Low-quality     | Genome-fragment | 2.88  | 0     |
| 57-final-viral-combined_k141_224375]] [full      | 1326  | No  | NA    | 0 | 0              | Not-determined  | Genome-fragment | NA    | 0     |
| 57-final-viral-combined_k141_244761]] [full      | 1818  | No  | NA    | 0 | 2              | Not-determined  | Genome-fragment | NA    | 0     |
| 57-final-viral-combined_k141_224381]] [full      | 11058 | No  | NA    | 0 | 2              | Not-determined  | Genome-fragment | NA    | 0     |
| 54-final-viral-combined_k141_86013]] [full       | 1973  | No  | NA    | 2 | 0              | Low-quality     | Genome-fragment | 4.63  | 0     |
| 58-final-viral-combined_k141_150196]] [full      | 1973  | No  | NA    | 0 | 0              | Low-quality     | Genome-fragment | 1.19  | 0     |
| 58-final-viral-combined_k141_82084]] [full       | 1973  | No  | NA    | 0 | 2              | Low-quality     | Genome-fragment | 1.68  | 0     |
| 57-final-viral-combined_k141_244803]] [full      | 2926  | No  | NA    | 0 | 1              | Not-determined  | Genome-fragment | NA    | 0     |
| 57-final-viral-combined_k141_224494]] [full      | 2452  | No  | NA    | 1 | 2              | Not-determined  | Genome-fragment | NA    | 0     |
| 57-final-viral-combined_k141_30186]] [full       | 2760  | No  | NA    | 0 | 3              | Not-determined  | Genome-fragment | NA    | 0     |
| 57-final-viral-combined_k141_224523]] [full      | 19119 | No  | NA    | 9 | 1              | Medium-quality  | Genome-fragment | 50.86 | 0     |
| 58-final-viral-combined_k141_27253]] [full       | 1974  | No  | NA    | 0 | 3              | Low-quality     | Genome-fragment | 4.18  | 0     |
| 57-final-viral-combined_k141_30240]] [full       | 12353 | No  | NA    | 0 | 0              | Not-determined  | Genome-fragment | NA    | 0     |
| 57-final-viral-combined_k141_30276]] [full       | 1956  | No  | NA    | 0 | 2              | Not-determined  | Genome-fragment | NA    | 0     |
| 57-final-viral-combined_k141_30299]] [full       | 3130  | No  | NA    | 0 | 3              | Not-determined  | Genome-fragment | NA    | 0     |
| 57-final-viral-combined_k141_30389]] [full       | 2121  | No  | NA    | 0 | 0              | Not-determined  | Genome-fragment | NA    | 0     |
| 57-final-viral-combined_k141_30463]] [full       | 1187  | No  | NA    | 0 | 1              | Not-determined  | Genome-fragment | NA    | 0     |
| 59_k141_93989                                    | 1974  | No  | NA    | 0 | 1              | Low-quality     | Genome-fragment | 0.33  | 0     |
| 51_k141_225081                                   | 1974  | No  | NA    | 0 | 0              | Low-quality     | Genome-fragment | 4.7   | 0     |
| 57-final-viral-combined_k141_30576]] [full       | 1416  | No  | NA    | 0 | 3              | Not-determined  | Genome-fragment | NA    | 0     |
| 517-k141_133809                                  | 1974  | No  | NA    | 0 | 1              | Low-quality     | Genome-fragment | 3.35  | 0     |
| 57-final-viral-combined_k141_143218]] [O_partial | 5781  | No  | NA    | 1 | 0              | High-quality    | High-quality    | 100   | 0     |
| 512-final-viral-combined_k141_340434]] [full     | 1974  | No  | NA    | 0 | 0              | Low-quality     | Genome-fragment | 5.11  | 0     |
| 57-final-viral-combined_k141_184132]] [O_partial | 12222 | No  | NA    | 0 | 6              | Not-determined  | Genome-fragment | NA    | 0     |
| 57-final-viral-combined_k141_41228]] [O_partial  | 11633 | No  | NA    | 0 | 5              | Not-determined  | Genome-fragment | NA    | 0     |
| 57-final-viral-combined_k141_163890]] [O_partial | 32788 | No  | NA    | 9 | 1              | Medium-quality  | Genome-fragment | 75.59 | 0     |
| 512-final-viral-combined_k141_63002]] [full      | 1974  | No  | NA    | 0 | 0              | Low-quality     | Genome-fragment | 5.19  | 0     |
| 57-final-viral-combined_k141_174309]] [O_partial | 30451 | No  | NA    | 0 | 18             | Not-determined  | Genome-fragment | NA    | 0     |
| 57-final-viral-combined_k141_174309]] [1_partial | 12056 | No  | NA    | 0 | 8              | Not-determined  | Genome-fragment | NA    | 0     |
| 57-final-viral-combined_k141_72070]] [O_partial  | 55473 | Yes | 41210 | 3 | 7              | High-quality    | High-quality    | 92.76 | 25.71 |
| 57-final-viral-combined_k141_116546]] [full      | 12615 | No  | NA    | 0 | 1              | Not-determined  | Genome-fragment | NA    | 0     |
| 512_k141_54282                                   | 1974  | No  | NA    | 0 | 0              | Low-quality     | Genome-fragment | 0.95  | 0     |
| 52-final-viral-combined_k141_63005]] [full       | 1974  | No  | NA    | 0 | 1              | Low-quality     | Genome-fragment | 2.6   | 0     |
| 52-final-viral-combined_k141_154779]] [H2gene    | 1974  | No  | NA    | 1 | 0              | Low-quality     | Genome-fragment | 1.51  | 0     |
| 56_k141_120567                                   | 1974  | No  | NA    | 1 | 0              | Low-quality     | Genome-fragment | 1.97  | 0     |
| 57-final-viral-combined_k141_114254]] [O_partial | 2735  | No  | NA    | 0 | 7              | Not-determined  | Genome-fragment | NA    | 0     |
| 57-final-viral-combined_k141_144442]] [O_partial | 12026 | No  | NA    | 0 | 8              | Not-determined  | Genome-fragment | NA    | 0     |



|                                       |          |      |    |    |   |   |                |                 |       |      |
|---------------------------------------|----------|------|----|----|---|---|----------------|-----------------|-------|------|
| 58-final-viral-combined_k141_311791   | [full]   | 1978 | No | NA | 0 | 0 | Low-quality    | Genome-fragment | 3.26  | 0    |
| 511-final-viral-combined_k141_702141  | [full]   | 1979 | No | NA | 0 | 1 | Low-quality    | Genome-fragment | 1.22  | 0    |
| 511-final-viral-combined_k141_527241  | [H2gene] | 1979 | No | NA | 2 | 0 | Low-quality    | Genome-fragment | 3.34  | 0    |
| 51-final-viral-combined_k141_130331   | [full]   | 1979 | No | NA | 0 | 1 | Low-quality    | Genome-fragment | 3.41  | 0    |
| 57-final-viral-combined_k141_262671   | [H2gene] | 1262 | No | NA | 0 | 0 | Not-determined | Genome-fragment | NA    | 0    |
| 55_k141_13871                         |          | 1979 | No | NA | 0 | 0 | Low-quality    | Genome-fragment | 3.35  | 0    |
| 512-final-viral-combined_k141_171781  | [full]   | 1979 | No | NA | 0 | 0 | Low-quality    | Genome-fragment | 2.82  | 0    |
| 57-final-viral-combined_k141_126711   | [H2gene] | 1170 | No | NA | 0 | 0 | Not-determined | Genome-fragment | NA    | 0    |
| 52-final-viral-combined_k141_140211   | [full]   | 1979 | No | NA | 0 | 0 | Low-quality    | Genome-fragment | 4.21  | 0    |
| 52-final-viral-combined_k141_123836   | [full]   | 1979 | No | NA | 2 | 0 | Low-quality    | Genome-fragment | 5.2   | 0    |
| 52_k141_231006                        |          | 1979 | No | NA | 0 | 1 | Low-quality    | Genome-fragment | 2.12  | 0    |
| 511-final-viral-combined_k141_802491  | [full]   | 1980 | No | NA | 3 | 0 | Low-quality    | Genome-fragment | 5.01  | 0    |
| 511_k141_43229                        |          | 1980 | No | NA | 2 | 0 | Low-quality    | Genome-fragment | 4.33  | 0    |
| 51-final-viral-combined_k141_894731   | [full]   | 1980 | No | NA | 3 | 0 | Low-quality    | Genome-fragment | 5.6   | 0    |
| 51-final-viral-combined_k141_123741   | [full]   | 1980 | No | NA | 0 | 1 | Low-quality    | Genome-fragment | 1.18  | 0    |
| 51-final-viral-combined_k141_260721   | [full]   | 1980 | No | NA | 1 | 0 | Low-quality    | Genome-fragment | 4.11  | 0    |
| 55_k141_205400                        |          | 1980 | No | NA | 0 | 1 | Low-quality    | Genome-fragment | 4.26  | 0    |
| 512-final-viral-combined_k141_168881  | [H2gene] | 1980 | No | NA | 1 | 0 | Low-quality    | Genome-fragment | 2.89  | 0    |
| 512_k141_142414                       |          | 1980 | No | NA | 0 | 0 | Low-quality    | Genome-fragment | 1.44  | 0    |
| 511-final-viral-combined_k141_1683751 | [full]   | 1981 | No | NA | 0 | 2 | Low-quality    | Genome-fragment | 1.03  | 0    |
| 51-final-viral-combined_k141_2765071  | [full]   | 1981 | No | NA | 2 | 0 | Low-quality    | Genome-fragment | 5.43  | 0    |
| 55-final-viral-combined_k141_1357021  | [H2gene] | 1981 | No | NA | 2 | 0 | Low-quality    | Genome-fragment | 4.75  | 0    |
| 56-final-viral-combined_k141_300811   | [full]   | 1981 | No | NA | 0 | 1 | Low-quality    | Genome-fragment | 6.75  | 0    |
| 57-final-viral-combined_k141_837471   | [H2gene] | 1638 | No | NA | 0 | 1 | Not-determined | Genome-fragment | NA    | 0    |
| 56_k141_746                           |          | 1982 | No | NA | 0 | 2 | Low-quality    | Genome-fragment | 1.41  | 0    |
| 57-final-viral-combined_k141_227491   | [H2gene] | 1354 | No | NA | 0 | 0 | Not-determined | Genome-fragment | NA    | 0    |
| 58_k141_226277                        |          | 1982 | No | NA | 0 | 1 | Low-quality    | Genome-fragment | 1.48  | 0    |
| 517-final-viral-combined_k141_656091  | [full]   | 1983 | No | NA | 0 | 0 | Low-quality    | Genome-fragment | 3.68  | 0    |
| 511-final-viral-combined_k141_105581  | [full]   | 1984 | No | NA | 0 | 1 | Low-quality    | Genome-fragment | 4.21  | 0    |
| 57-final-viral-combined_k141_1455791  | [H2gene] | 1358 | No | NA | 0 | 1 | Not-determined | Genome-fragment | NA    | 0    |
| 511-final-viral-combined_k141_316231  | [H2gene] | 1984 | No | NA | 2 | 0 | Low-quality    | Genome-fragment | 5.19  | 0    |
| 51-final-viral-combined_k141_301401   | [full]   | 1984 | No | NA | 0 | 0 | Low-quality    | Genome-fragment | 5.54  | 0    |
| 57-final-viral-combined_k141_1031331  | [full]   | 1984 | No | NA | 2 | 0 | Low-quality    | Genome-fragment | 3.58  | 0    |
| 57-final-viral-combined_k141_442041   | [H2gene] | 1384 | No | NA | 0 | 1 | Not-determined | Genome-fragment | NA    | 0    |
| 517-final-viral-combined_k141_912191  | [full]   | 1984 | No | NA | 0 | 2 | Low-quality    | Genome-fragment | 3.29  | 0    |
| 52-final-viral-combined_k141_1554131  | [full]   | 1984 | No | NA | 0 | 1 | Low-quality    | Genome-fragment | 1.04  | 0    |
| 57-final-viral-combined_k141_1884461  | [H2gene] | 1522 | No | NA | 0 | 0 | Not-determined | Genome-fragment | NA    | 0    |
| 58-final-viral-combined_k141_1880291  | [full]   | 1984 | No | NA | 0 | 0 | Low-quality    | Genome-fragment | 1.81  | 0    |
| 57-final-viral-combined_k141_4231     | [full]   | 1985 | No | NA | 0 | 0 | Low-quality    | Genome-fragment | 2.01  | 0    |
| 57-final-viral-combined_k141_956881   | [full]   | 1985 | No | NA | 0 | 0 | Low-quality    | Genome-fragment | 3.58  | 0    |
| 56_k141_139405                        |          | 1985 | No | NA | 0 | 3 | Low-quality    | Genome-fragment | 0.33  | 0    |
| 57-final-viral-combined_k141_1576921  | [H2gene] | 1289 | No | NA | 0 | 0 | Not-determined | Genome-fragment | NA    | 0    |
| 57-final-viral-combined_k141_1470751  | [H2gene] | 2213 | No | NA | 0 | 0 | Not-determined | Genome-fragment | NA    | 0    |
| 59-final-viral-combined_k141_982151   | [full]   | 1986 | No | NA | 2 | 0 | Low-quality    | Genome-fragment | 5.23  | 0    |
| 57-final-viral-combined_k141_961621   | [H2gene] | 1183 | No | NA | 0 | 0 | Not-determined | Genome-fragment | NA    | 0    |
| 511-final-viral-combined_k141_58041   | [full]   | 1986 | No | NA | 0 | 1 | Low-quality    | Genome-fragment | 4.6   | 0    |
| 51-final-viral-combined_k141_834401   | [full]   | 1986 | No | NA | 0 | 0 | Low-quality    | Genome-fragment | 10.32 | 0    |
| 517-final-viral-combined_k141_130321  | [full]   | 1986 | No | NA | 0 | 0 | Low-quality    | Genome-fragment | 5.43  | 0    |
| 512-final-viral-combined_k141_1759651 | [full]   | 1986 | No | NA | 0 | 1 | Low-quality    | Genome-fragment | 3.58  | 0    |
| 512-final-viral-combined_k141_3652021 | [full]   | 1986 | No | NA | 0 | 0 | Low-quality    | Genome-fragment | 5.71  | 0    |
| 512-final-viral-combined_k141_3510941 | [full]   | 1986 | No | NA | 2 | 0 | Low-quality    | Genome-fragment | 4.27  | 0    |
| 57-final-viral-combined_k141_1893191  | [H2gene] | 5556 | No | NA | 0 | 0 | Not-determined | Genome-fragment | NA    | 0    |
| 57-final-viral-combined_k141_667901   | [H2gene] | 1415 | No | NA | 0 | 1 | Not-determined | Genome-fragment | NA    | 0    |
| 511-final-viral-combined_k141_1460851 | [full]   | 1987 | No | NA | 0 | 0 | Low-quality    | Genome-fragment | 3.69  | 0    |
| 51-final-viral-combined_k141_535361   | [full]   | 1987 | No | NA | 1 | 0 | Low-quality    | Genome-fragment | 1.45  | 0    |
| 55-final-viral-combined_k141_1939241  | [full]   | 1987 | No | NA | 0 | 1 | Low-quality    | Genome-fragment | 14.86 | 0    |
| 517-final-viral-combined_k141_1858941 | [full]   | 1987 | No | NA | 0 | 1 | Low-quality    | Genome-fragment | 2.55  | 0    |
| 512-final-viral-combined_k141_1833261 | [full]   | 1987 | No | NA | 1 | 0 | Low-quality    | Genome-fragment | 6.93  | 0    |
| 52-final-viral-combined_k141_2206571  | [H2gene] | 1987 | No | NA | 2 | 0 | Low-quality    | Genome-fragment | 6.58  | 0    |
| 56_k141_133965                        |          | 1987 | No | NA | 1 | 0 | Low-quality    | Genome-fragment | 32.47 | 0    |
| 55-final-viral-combined_k141_61981    | [full]   | 1988 | No | NA | 0 | 0 | Low-quality    | Genome-fragment | 4.52  | 0    |
| 517-final-viral-combined_k141_1328701 | [full]   | 1988 | No | NA | 0 | 0 | Low-quality    | Genome-fragment | 3.43  | 0    |
| 56_k141_52072                         |          | 1988 | No | NA | 1 | 0 | Low-quality    | Genome-fragment | 2.33  | 0    |
| 51-final-viral-combined_k141_1344841  | [full]   | 1989 | No | NA | 0 | 1 | Low-quality    | Genome-fragment | 0.96  | 0    |
| 57-final-viral-combined_k141_1072421  | [H2gene] | 1121 | No | NA | 0 | 0 | Not-determined | Genome-fragment | NA    | 0    |
| 55-final-viral-combined_k141_4511     | [full]   | 1989 | No | NA | 0 | 0 | Low-quality    | Genome-fragment | 3.16  | 0    |
| 57-final-viral-combined_k141_1527531  | [full]   | 1989 | No | NA | 1 | 0 | Low-quality    | Genome-fragment | 3.88  | 0    |
| 512-final-viral-combined_k141_2931431 | [full]   | 1989 | No | NA | 0 | 2 | Low-quality    | Genome-fragment | 3.79  | 0    |
| 57-final-viral-combined_k141_173831   | [H2gene] | 1350 | No | NA | 0 | 0 | Not-determined | Genome-fragment | NA    | 0    |
| 59-final-viral-combined_k141_1044771  | [full]   | 1990 | No | NA | 0 | 0 | Low-quality    | Genome-fragment | 4.62  | 0    |
| 51-final-viral-combined_k141_2951091  | [full]   | 1990 | No | NA | 0 | 1 | Low-quality    | Genome-fragment | 2.4   | 0    |
| 51-final-viral-combined_k141_1521291  | [full]   | 1991 | No | NA | 0 | 0 | Low-quality    | Genome-fragment | 1.94  | 0    |
| 51-final-viral-combined_k141_3705561  | [full]   | 1991 | No | NA | 1 | 0 | Low-quality    | Genome-fragment | 4.23  | 0    |
| 55-final-viral-combined_k141_836481   | [full]   | 1991 | No | NA | 0 | 0 | Low-quality    | Genome-fragment | 3.46  | 0    |
| 57-final-viral-combined_k141_682761   | [full]   | 1273 | No | NA | 0 | 0 | Not-determined | Genome-fragment | NA    | 0    |
| 57-final-viral-combined_k141_1291831  | [H2gene] | 1540 | No | NA | 0 | 0 | Not-determined | Genome-fragment | NA    | 0    |
| 52-final-viral-combined_k141_7241     | [full]   | 1991 | No | NA | 1 | 0 | Low-quality    | Genome-fragment | 3.36  | 0    |
| 54_k141_155005                        |          | 1991 | No | NA | 0 | 0 | Low-quality    | Genome-fragment | 3.16  | 0    |
| 54_k141_33194                         |          | 1991 | No | NA | 0 | 0 | Low-quality    | Genome-fragment | 4.46  | 0    |
| 57-final-viral-combined_k141_2114191  | [H2gene] | 1519 | No | NA | 0 | 0 | Not-determined | Genome-fragment | NA    | 0    |
| 56-final-viral-combined_k141_1402961  | [full]   | 1991 | No | NA | 2 | 0 | Low-quality    | Genome-fragment | 3.29  | 0    |
| 57-final-viral-combined_k141_985781   | [H2gene] | 3208 | No | NA | 0 | 1 | Not-determined | Genome-fragment | NA    | 0    |
| 56_k141_22125                         |          | 1991 | No | NA | 0 | 0 | Low-quality    | Genome-fragment | 3.96  | 0    |
| 59-final-viral-combined_k141_1049761  | [full]   | 1992 | No | NA | 0 | 2 | Low-quality    | Genome-fragment | 2.48  | 0    |
| 511-final-viral-combined_k141_2826391 | [full]   | 1992 | No | NA | 0 | 0 | Low-quality    | Genome-fragment | 1.29  | 0    |
| 55-final-viral-combined_k141_237361   | [full]   | 1992 | No | NA | 0 | 0 | Low-quality    | Genome-fragment | 4.75  | 0    |
| 57-final-viral-combined_k141_583611   | [H2gene] | 1513 | No | NA | 0 | 1 | Not-determined | Genome-fragment | NA    | 0    |
| 52-final-viral-combined_k141_17181    | [full]   | 1992 | No | NA | 0 | 0 | Low-quality    | Genome-fragment | 3.29  | 0    |
| 52-final-viral-combined_k141_178341   | [full]   | 1992 | No | NA | 0 | 0 | Low-quality    | Genome-fragment | 1.65  | 0    |
| 59-final-viral-combined_k141_113241   | [H2gene] | 1993 | No | NA | 2 | 0 | Low-quality    | Genome-fragment | 4.18  | 0    |
| 517_k141_62084                        |          | 1993 | No | NA | 0 | 1 | Low-quality    | Genome-fragment | 2.35  | 0    |
| 512-final-viral-combined_k141_2053501 | [full]   | 1993 | No | NA | 2 | 0 | Low-quality    | Genome-fragment | 4.36  | 0    |
| 54-final-viral-combined_k141_424901   | [H2gene] | 1993 | No | NA | 0 | 0 | Low-quality    | Genome-fragment | 4.6   | 0    |
| 58-final-viral-combined_k141_205591   | [full]   | 1993 | No | NA | 2 | 0 | Low-quality    | Genome-fragment | 4.83  | 0    |
| 59_k141_126987                        |          | 1994 | No | NA | 3 | 0 | Low-quality    | Genome-fragment | 6.01  | 0    |
| 511-final-viral-combined_k141_351601  | [full]   | 1994 | No | NA | 0 | 0 | Low-quality    | Genome-fragment | 4.02  | 0    |
| 57-final-viral-combined_k141_1580131  | [full]   | 1994 | No | NA | 0 | 0 | Low-quality    | Genome-fragment | 3.73  | 0    |
| 512-final-viral-combined_k141_348621  | [full]   | 1994 | No | NA | 1 | 0 | Low-quality    | Genome-fragment | 2.3   | 0    |
| 512-final-viral-combined_k141_2558431 | [H2gene] | 1994 | No | NA | 0 | 0 | Low-quality    | Genome-fragment | 2.08  | 0    |
| 52-final-viral-combined_k141_1578181  | [full]   | 1994 | No | NA | 0 | 2 | Low-quality    | Genome-fragment | 0.57  | 0    |
| 52_k141_1232084                       |          | 1994 | No | NA | 0 | 2 | Low-quality    | Genome-fragment | 2.05  | 0    |
| 57-final-viral-combined_k141_66251    | [full]   | 1995 | No | NA | 0 | 0 | Low-quality    | Genome-fragment | 1.42  | 0    |
| 57-final-viral-combined_k141_2325561  | [full]   | 1995 | No | NA | 0 | 2 | Low-quality    | Genome-fragment | 2.89  | 0    |
| 512-final-viral-combined_k141_2978141 | [full]   | 1995 | No | NA | 0 | 1 | Low-quality    | Genome-fragment | 2.55  | 0    |
| 512-final-viral-combined_k141_334471  | [H2gene] | 1995 | No | NA | 2 | 0 | Low-quality    | Genome-fragment | 0.99  | 0    |
| 57-final-viral-combined_k141_1826171  | [H2gene] | 1268 | No | NA | 0 | 0 | Not-determined | Genome-fragment | NA    | 0    |
| 512_k141_203581                       |          | 1995 | No | NA | 0 | 2 | Low-quality    | Genome-fragment | 1.79  | 0    |
| 52-final-viral-combined_k141_2394001  | [full]   | 1995 | No | NA | 0 | 0 | Low-quality    | Genome-fragment | 4.66  | 0    |
| 56-final-viral-combined_k141_1343971  | [full]   | 1995 | No | NA | 0 | 1 | Low-quality    | Genome-fragment | 0.53  | 0    |
| 58-final-viral-combined_k141_869311   | [H2gene] | 1995 | No | NA | 1 | 0 | Low-quality    | Genome-fragment | 3.32  | 0    |
| 59-final-viral-combined_k141_242381   | [full]   | 1996 | No | NA | 0 | 0 | Low-quality    | Genome-fragment | 3.3   | 0    |
| 511-final-viral-combined_k141_135921  | [full]   | 1996 | No | NA | 0 | 0 | Low-quality    | Genome-fragment | 2.56  | 0    |
| 57-final-viral-combined_k141_622571   | [full]   | 1996 | No | NA | 0 | 0 | Low-quality    | Genome-fragment | 3.72  | 0    |
| 517-final-viral-combined_k141_1241481 | [full]   | 1996 | No | NA | 0 | 0 | Low-quality    | Genome-fragment | 3.73  | 0    |
| 512_k141_266299                       |          | 1996 | No | NA | 0 | 0 | Low-quality    | Genome-fragment | 1.09  | 0    |
| 52-final-viral-combined_k141_1927551  | [full]   | 1996 | No | NA | 2 | 0 | Low-quality    | Genome-fragment | 3.45  | 0    |
| 57-final-viral-combined_k141_193811   | [H2gene] | 1400 | No | NA | 0 | 0 | Not-determined | Genome-fragment | NA    | 0    |
| 52-final-viral-combined_k141_113401   | [full]   | 1996 | No | NA | 0 | 2 | Low-quality    | Genome-fragment | 1.92  | 0    |
| 52_k141_108193                        |          | 1996 | No | NA | 1 | 0 | Low-quality    | Genome-fragment | 3.09  | 0    |
| 57-final-viral-combined_k141_509891   | [H2gene] | 1017 | No | NA | 0 | 0 | Not-determined | Genome-fragment | NA    | 0    |
| 54-final-viral-combined_k141_252621   | [full]   | 1996 | No | NA | 1 | 0 | Low-quality    | Genome-fragment | 3.02  | 0    |
| 57-final-viral-combined_k141_1525841  | [H2gene] | 2201 | No | NA | 0 | 0 | Not-determined | Genome-fragment | NA    | 0    |
| 57-final-viral-combined_k141_913141   | [H2gene] | 2211 | No | NA | 0 | 0 | Not-determined | Genome-fragment | NA    | 0    |
| 57-final-viral-combined_k141_809591   | [H2gene] | 1852 | No | NA | 0 | 0 | Not-determined | Genome-fragment | NA    | 0    |
| 58-final-viral-combined_k141_1381781  | [full]   | 1996 | No | NA | 0 | 0 | Low-quality    | Genome-fragment | NA    | 12.9 |
| 57_k141_183808                        |          | 1025 | No | NA | 0 | 1 | Not-determined | Genome-fragment | NA    | 0    |
| 58-final-viral-combined_k141_1121891  | [full]   | 1996 | No | NA | 0 | 1 | Low-quality    | Genome-fragment | 1.15  | 0    |



|                                            |       |     |      |    |    |                  |                 |    |       |
|--------------------------------------------|-------|-----|------|----|----|------------------|-----------------|----|-------|
| S7_k141_122789                             | 3756  | No  | NA   | 0  | 1  | Not-determined   | Genome-fragment | NA | 0     |
| S7_k141_92150                              | 1047  | No  | NA   | 0  | 0  | Not-determined   | Genome-fragment | NA | 0     |
| S7_k141_194259                             | 2111  | No  | NA   | 0  | 0  | 1 Not-determined | Genome-fragment | NA | 0     |
| S5-final-viral-combined_k141_83275[full]   | 1998  | No  | NA   | 0  | 0  | Low-quality      | Genome-fragment | NA | 4.97  |
| S7_k141_122832                             | 1540  | No  | NA   | 0  | 1  | Not-determined   | Genome-fragment | NA | 0     |
| S7_k141_30869                              | 1127  | No  | NA   | 0  | 0  | Not-determined   | Genome-fragment | NA | 0     |
| S5-final-viral-combined_k141_149661[full]  | 1998  | No  | NA   | 0  | 3  | Low-quality      | Genome-fragment | NA | 2.66  |
| S7_k141_163722                             | 1412  | No  | NA   | 0  | 1  | Not-determined   | Genome-fragment | NA | 0     |
| S7_k141_163742                             | 1138  | No  | NA   | 0  | 0  | Not-determined   | Genome-fragment | NA | 0     |
| S7_k141_10443                              | 1558  | No  | NA   | 0  | 0  | Not-determined   | Genome-fragment | NA | 0     |
| S7_k141_235189                             | 2036  | No  | NA   | 0  | 2  | Not-determined   | Genome-fragment | NA | 0     |
| S7_k141_92158                              | 1178  | No  | NA   | 0  | 0  | Not-determined   | Genome-fragment | NA | 0     |
| S7_k141_122846                             | 27928 | No  | NA   | 0  | 10 | Not-determined   | Genome-fragment | NA | 0     |
| S7_k141_20673                              | 4680  | No  | NA   | 0  | 1  | Not-determined   | Genome-fragment | NA | 0     |
| S5-final-viral-combined_k141_33796[full]   | 1998  | No  | NA   | 0  | 2  | Low-quality      | Genome-fragment | NA | 1.48  |
| S7_k141_93305                              | 1404  | No  | NA   | 0  | 1  | Not-determined   | Genome-fragment | NA | 0     |
| S7_k141_194410                             | 1560  | No  | NA   | 0  | 0  | Not-determined   | Genome-fragment | NA | 0     |
| S7_k141_163832                             | 2048  | No  | NA   | 0  | 1  | Not-determined   | Genome-fragment | NA | 0     |
| S12-final-viral-combined_k141_253250[full] | 1998  | No  | NA   | 0  | 0  | Low-quality      | Genome-fragment | NA | 2.42  |
| S7_k141_81945                              | 3229  | No  | NA   | 0  | 4  | Not-determined   | Genome-fragment | NA | 0     |
| S7_k141_10485                              | 1804  | No  | NA   | 0  | 1  | Not-determined   | Genome-fragment | NA | 0     |
| S7_k141_173939                             | 3026  | No  | NA   | 0  | 1  | Not-determined   | Genome-fragment | NA | 0     |
| S2_k141_240515                             | 1998  | No  | NA   | 0  | 2  | Low-quality      | Genome-fragment | NA | 1.28  |
| S7_k141_143329                             | 3822  | No  | NA   | 0  | 2  | Not-determined   | Genome-fragment | NA | 0     |
| S7_k141_194489                             | 1092  | No  | NA   | 0  | 1  | Not-determined   | Genome-fragment | NA | 0     |
| S7_k141_163898                             | 1816  | No  | NA   | 0  | 0  | Not-determined   | Genome-fragment | NA | 0     |
| S7_k141_10556                              | 12514 | No  | NA   | 0  | 11 | Not-determined   | Genome-fragment | NA | 0     |
| S7_k141_225182                             | 1009  | No  | NA   | 0  | 0  | Not-determined   | Genome-fragment | NA | 0     |
| S12-final-viral-combined_k141_28905[full]  | 1999  | No  | NA   | 1  | 0  | Low-quality      | Genome-fragment | NA | 1.52  |
| S7_k141_204611                             | 1110  | No  | NA   | 0  | 0  | Not-determined   | Genome-fragment | NA | 0     |
| S7_k141_528                                | 1170  | No  | NA   | 0  | 0  | Not-determined   | Genome-fragment | NA | 0     |
| S7_k141_214859                             | 1104  | No  | NA   | 0  | 1  | Not-determined   | Genome-fragment | NA | 0     |
| S8_k141_122060                             | 1999  | No  | NA   | 0  | 2  | Low-quality      | Genome-fragment | NA | 2.16  |
| S7_k141_71719                              | 5393  | No  | NA   | 0  | 1  | Not-determined   | Genome-fragment | NA | 0     |
| S7_k141_214875                             | 3359  | No  | NA   | 0  | 2  | Not-determined   | Genome-fragment | NA | 0     |
| S7_k141_143480                             | 1129  | No  | NA   | 0  | 0  | Not-determined   | Genome-fragment | NA | 0     |
| S7_k141_214886                             | 1076  | No  | NA   | 0  | 1  | Not-determined   | Genome-fragment | NA | 0     |
| S7_k141_235426                             | 1420  | No  | NA   | 0  | 0  | Not-determined   | Genome-fragment | NA | 0     |
| S7_k141_214898                             | 1145  | No  | NA   | 0  | 1  | Not-determined   | Genome-fragment | NA | 0     |
| S7_k141_174068                             | 2391  | No  | NA   | 0  | 0  | Not-determined   | Genome-fragment | NA | 0     |
| S5-final-viral-combined_k141_11848[full]   | 2000  | No  | NA   | 0  | 0  | Low-quality      | Genome-fragment | NA | 3.01  |
| S7_k141_204664                             | 4099  | No  | NA   | 0  | 2  | Not-determined   | Genome-fragment | NA | 0     |
| S5-final-viral-combined_k141_115870[full]  | 2000  | No  | NA   | 0  | 0  | Low-quality      | Genome-fragment | NA | 4.48  |
| S7_k141_92390                              | 11420 | No  | NA   | 0  | 2  | Not-determined   | Genome-fragment | NA | 0     |
| S7_k141_61844                              | 1151  | No  | NA   | 0  | 0  | Not-determined   | Genome-fragment | NA | 0     |
| S7_k141_184320                             | 1301  | No  | NA   | 0  | 1  | Not-determined   | Genome-fragment | NA | 0     |
| S7_k141_10674                              | 1951  | No  | NA   | 0  | 0  | Not-determined   | Genome-fragment | NA | 0     |
| S7_k141_174122                             | 1819  | No  | NA   | 0  | 1  | Not-determined   | Genome-fragment | NA | 0     |
| S7_k141_10680                              | 1918  | No  | NA   | 0  | 1  | Not-determined   | Genome-fragment | NA | 0     |
| S5-final-viral-combined_k141_198391[full]  | 2000  | No  | NA   | 0  | 1  | Low-quality      | Genome-fragment | NA | 3.61  |
| S5-final-viral-combined_k141_162895[full]  | 2000  | No  | NA   | 0  | 0  | Low-quality      | Genome-fragment | NA | 9.15  |
| S7_k141_132221                             | 1242  | No  | NA   | 0  | 0  | Not-determined   | Genome-fragment | NA | 0     |
| S7_k141_225349                             | 1415  | No  | NA   | 0  | 0  | Not-determined   | Genome-fragment | NA | 0     |
| S7_k141_71848                              | 3776  | No  | NA   | 0  | 0  | Not-determined   | Genome-fragment | NA | 0     |
| S7_k141_215085                             | 1316  | No  | NA   | 0  | 1  | Not-determined   | Genome-fragment | NA | 0     |
| S17-final-viral-combined_k141_110560[full] | 2000  | No  | NA   | 0  | 1  | Low-quality      | Genome-fragment | NA | 2.6   |
| S7_k141_706                                | 1282  | No  | NA   | 0  | 0  | Not-determined   | Genome-fragment | NA | 0     |
| S7_k141_10736                              | 10000 | No  | NA   | 0  | 4  | Not-determined   | Genome-fragment | NA | 0     |
| S17-k141_53522                             | 2000  | No  | NA   | 2  | 0  | Low-quality      | Genome-fragment | NA | 4.96  |
| S7_k141_71892                              | 1445  | No  | NA   | 0  | 0  | Not-determined   | Genome-fragment | NA | 0     |
| S7_k141_235564                             | 1292  | No  | NA   | 0  | 1  | Not-determined   | Genome-fragment | NA | 0     |
| S7_k141_82201                              | 1723  | No  | NA   | 0  | 1  | Not-determined   | Genome-fragment | NA | 0     |
| S7_k141_31171                              | 1034  | No  | NA   | 0  | 0  | Not-determined   | Genome-fragment | NA | 0     |
| S7_k141_71932                              | 3638  | No  | NA   | 0  | 1  | Not-determined   | Genome-fragment | NA | 0     |
| S7_k141_194877                             | 1525  | No  | NA   | 0  | 0  | Not-determined   | Genome-fragment | NA | 0     |
| S7_k141_102707                             | 1021  | No  | NA   | 0  | 0  | Not-determined   | Genome-fragment | NA | 0     |
| S7_k141_164101                             | 4786  | No  | NA   | 0  | 3  | Not-determined   | Genome-fragment | NA | 0     |
| S7_k141_113137                             | 3741  | No  | NA   | 14 | 0  | High-quality     | High-quality    | NA | 100   |
| S7_k141_194924                             | 3782  | No  | NA   | 0  | 2  | Not-determined   | Genome-fragment | NA | 0     |
| S7_k141_123136                             | 1367  | No  | NA   | 0  | 2  | Not-determined   | Genome-fragment | NA | 0     |
| S6-final-viral-combined_k141_106788[full]  | 2000  | No  | NA   | 0  | 1  | Low-quality      | Genome-fragment | NA | 2.83  |
| S7_k141_801                                | 1210  | No  | NA   | 0  | 0  | Not-determined   | Genome-fragment | NA | 0     |
| S7_k141_184406                             | 2055  | No  | NA   | 0  | 1  | Not-determined   | Genome-fragment | NA | 0     |
| S7_k141_815                                | 2351  | No  | NA   | 0  | 4  | Not-determined   | Genome-fragment | NA | 0     |
| S7_k141_154061                             | 2661  | No  | NA   | 0  | 0  | Not-determined   | Genome-fragment | NA | 0     |
| S1_k141_306933                             | 2001  | No  | NA   | 1  | 0  | Low-quality      | Genome-fragment | NA | 1.54  |
| S7_k141_62004                              | 1432  | No  | NA   | 0  | 1  | Not-determined   | Genome-fragment | NA | 0     |
| S7_k141_82282                              | 3630  | No  | NA   | 0  | 2  | Not-determined   | Genome-fragment | NA | 0     |
| S3_k141_93798                              | 2001  | No  | NA   | 1  | 0  | Low-quality      | Genome-fragment | NA | 4.3   |
| S12-final-viral-combined_k141_6836[full]   | 2001  | No  | NA   | 0  | 0  | Low-quality      | Genome-fragment | NA | 3.09  |
| S7_k141_31242                              | 1175  | No  | NA   | 0  | 1  | Not-determined   | Genome-fragment | NA | 0     |
| S7_k141_25554                              | 6013  | No  | NA   | 0  | 1  | Not-determined   | Genome-fragment | NA | 0     |
| S7_k141_194974                             | 1111  | No  | NA   | 0  | 1  | Not-determined   | Genome-fragment | NA | 0     |
| S7_k141_113198                             | 9381  | No  | NA   | 0  | 2  | Not-determined   | Genome-fragment | NA | 0     |
| S12_k141_307845                            | 2001  | No  | NA   | 3  | 0  | Low-quality      | Genome-fragment | NA | 5.71  |
| S7_k141_72028                              | 1018  | No  | NA   | 0  | 0  | Not-determined   | Genome-fragment | NA | 0     |
| S7_k141_235730                             | 3471  | No  | NA   | 0  | 2  | Not-determined   | Genome-fragment | NA | 0     |
| S7_k141_41370                              | 2042  | No  | NA   | 0  | 0  | Not-determined   | Genome-fragment | NA | 0     |
| S7_k141_51615                              | 1215  | No  | NA   | 0  | 1  | Not-determined   | Genome-fragment | NA | 0     |
| S7_k141_215370                             | 1767  | No  | NA   | 0  | 1  | Not-determined   | Genome-fragment | NA | 0     |
| S7_k141_92551                              | 1588  | No  | NA   | 0  | 1  | Not-determined   | Genome-fragment | NA | 0     |
| S6_k141_87897                              | 2002  | No  | NA   | 0  | 1  | Low-quality      | Genome-fragment | NA | 0.19  |
| S11-final-viral-combined_k141_196050[full] | 2002  | No  | NA   | 0  | 1  | Low-quality      | Genome-fragment | NA | 4.19  |
| S7_k141_154219                             | 4554  | No  | NA   | 0  | 8  | Not-determined   | Genome-fragment | NA | 0     |
| S7_k141_113290                             | 7915  | No  | NA   | 0  | 1  | Not-determined   | Genome-fragment | NA | 0     |
| S7_k141_164259                             | 1101  | No  | NA   | 0  | 1  | Not-determined   | Genome-fragment | NA | 0     |
| S7_k141_31379                              | 1437  | No  | NA   | 0  | 0  | Not-determined   | Genome-fragment | NA | 0     |
| S7_k141_133572                             | 1032  | No  | NA   | 0  | 1  | Not-determined   | Genome-fragment | NA | 0     |
| S7_k141_51719                              | 3169  | No  | NA   | 0  | 2  | Not-determined   | Genome-fragment | NA | 0     |
| S7_k141_225513                             | 1517  | No  | NA   | 0  | 0  | Not-determined   | Genome-fragment | NA | 0     |
| S11-final-viral-combined_k141_80551[full]  | 2002  | No  | NA   | 0  | 0  | Low-quality      | Genome-fragment | NA | 1.09  |
| S7_k141_235737                             | 2667  | No  | NA   | 0  | 1  | Not-determined   | Genome-fragment | NA | 0     |
| S7_k141_41525                              | 7477  | No  | NA   | 0  | 2  | Not-determined   | Genome-fragment | NA | 0     |
| S7_k141_235787                             | 1230  | No  | NA   | 0  | 3  | Not-determined   | Genome-fragment | NA | 0     |
| S1-final-viral-combined_k141_36449[full]   | 2002  | No  | NA   | 2  | 0  | Low-quality      | Genome-fragment | NA | 3.73  |
| S5-final-viral-combined_k141_150440[full]  | 2002  | Yes | 215  | 1  | 1  | Low-quality      | Genome-fragment | NA | 0.14  |
| S7_k141_31481                              | 3410  | No  | NA   | 0  | 1  | Not-determined   | Genome-fragment | NA | 89.26 |
| S7_k141_215462                             | 4455  | No  | NA   | 0  | 3  | Not-determined   | Genome-fragment | NA | 0     |
| S7_k141_31511                              | 1375  | No  | NA   | 0  | 2  | Not-determined   | Genome-fragment | NA | 0     |
| S7_k141_32679                              | 1418  | No  | NA   | 0  | 1  | Not-determined   | Genome-fragment | NA | 0     |
| S7_k141_31518                              | 1354  | No  | NA   | 0  | 1  | Not-determined   | Genome-fragment | NA | 0     |
| S5-final-viral-combined_k141_160274[full]  | 2002  | Yes | 1322 | 2  | 0  | Low-quality      | Genome-fragment | NA | 2.99  |
| S7_k141_154304                             | 1066  | No  | NA   | 0  | 0  | Not-determined   | Genome-fragment | NA | 31.97 |
| S7_k141_133572                             | 2002  | No  | NA   | 1  | 0  | Low-quality      | Genome-fragment | NA | 4.03  |
| S7_k141_225558                             | 5759  | No  | NA   | 0  | 2  | Not-determined   | Genome-fragment | NA | 0     |
| S7_k141_41575                              | 3404  | No  | NA   | 0  | 1  | Not-determined   | Genome-fragment | NA | 0     |
| S7_k141_174331                             | 3494  | No  | NA   | 0  | 0  | Not-determined   | Genome-fragment | NA | 0     |
| S2-final-viral-combined_k141_121234[full]  | 2002  | No  | NA   | 1  | 0  | Low-quality      | Genome-fragment | NA | 2.69  |
| S8-final-viral-combined_k141_224129[full]  | 2002  | No  | NA   | 0  | 1  | Low-quality      | Genome-fragment | NA | 5.47  |
| S11-final-viral-combined_k141_189953[full] | 2003  | No  | NA   | 2  | 0  | Low-quality      | Genome-fragment | NA | 2.46  |
| S7_k141_225611                             | 1166  | No  | NA   | 0  | 2  | Not-determined   | Genome-fragment | NA | 0     |
| S7_k141_107740                             | 3458  | No  | NA   | 0  | 2  | Not-determined   | Genome-fragment | NA | 0     |
| S7_k141_82481                              | 1679  | No  | NA   | 0  | 3  | Not-determined   | Genome-fragment | NA | 0     |
| S5-final-viral-combined_k141_18046[full]   | 2003  | No  | NA   | 0  | 2  | Low-quality      | Genome-fragment | NA | 3.29  |
| S7_k141_122427                             | 3802  | No  | NA   | 0  | 0  | Not-determined   | Genome-fragment | NA | 0     |
| S7_k141_225638                             | 1105  | No  | NA   | 0  | 1  | Not-determined   | Genome-fragment | NA | 0     |
| S7_k141_904                                | 1307  | No  | NA   | 0  | 0  | Not-determined   | Genome-fragment | NA | 0     |
| S7_k141_225645                             | 5073  | No  | NA   | 0  | 3  | Not-determined   | Genome-fragment | NA | 0     |
| S7_k141_205176                             | 5005  | No  | NA   | 0  | 2  | Not-determined   | Genome-fragment | NA | 0     |
| S5-final-viral-combined_k141_157278[full]  | 2003  | No  | NA   | 0  | 1  | Low-quality      | Genome-fragment | NA | 2.41  |
| S7_k141_31575                              | 3667  | No  | NA   | 0  | 1  | Not-determined   | Genome-fragment | NA | 0     |
| S7_k141_143652                             | 1253  | No  | NA   | 0  | 0  | Not-determined   | Genome-fragment | NA | 0     |
| S17-final-viral-combined_k141_56321[full]  | 2003  | No  | NA   | 0  | 1  | Low-quality      | Genome-fragment | NA | 3.07  |
| S7_k141_133755                             | 1121  | No  | NA   | 0  | 0  | Not-determined   | Genome-fragment | NA | 0     |
| S7_k141_133762                             | 4566  | No  | NA   | 0  | 3  | Not-determined   | Genome-fragment | NA | 0     |
| S17-final-viral-combined_k141_113239[full] | 2003  | No  | NA   | 0  | 1  | Low-quality      | Genome-fragment | NA | 1.76  |
| S7_k141_41668                              | 1184  | No  | NA   | 0  | 1  | Not-determined   | Genome-fragment | NA | 0     |
| S12-final-viral-combined_k141_274620[full] | 2003  | No  | NA   | 2  | 0  | Low-quality      | Genome-fragment | NA | 5.13  |
| S7_k141_11257                              | 2794  | No  | NA   | 0  | 0  | Not-determined   | Genome-fragment | NA | 0     |
| S7_k141_205337                             | 1447  | No  | NA   | 0  | 1  | Not-determined   | Genome-fragment | NA | 0     |
| S7_k141_205339                             | 1673  | No  | NA   | 0  | 0  | Not-determined   | Genome-fragment | NA | 0     |
| S7_k141_133834                             | 1031  | No  | NA   | 0  | 0  | Not-determined   | Genome-fragment | NA | 0     |
| S7_k141_113506                             | 2679  | No  | NA   | 0  | 1  | Not-determined   | Genome-fragment | NA | 0     |
| S7_k141_215701                             | 2463  | No  | NA   | 0  | 1  | Not-determined   | Genome-fragment | NA | 0     |
| S4_k141_137075                             | 2003  | No  | NA   | 0  | 0  | Low-quality      | Genome-fragment | NA | 2.3   |
| S7_k141_154489                             | 3381  | No  | NA   | 0  | 1  | Not-determined   | Genome-fragment | NA | 0     |
| S7_k                                       |       |     |      |    |    |                  |                 |    |       |



|                                             |       |    |    |    |   |                |                 |       |   |
|---------------------------------------------|-------|----|----|----|---|----------------|-----------------|-------|---|
| S7_k141_123753                              | 4745  | No | NA | 0  | 1 | Not-determined | Genome-fragment | NA    | 0 |
| S7_k141_126125                              | 1274  | No | NA | 0  | 0 | Not-determined | Genome-fragment | NA    | 0 |
| S7_k141_174739                              | 3265  | No | NA | 0  | 0 | Not-determined | Genome-fragment | NA    | 0 |
| S7_k141_174767                              | 3509  | No | NA | 0  | 0 | Not-determined | Genome-fragment | NA    | 0 |
| S7_k141_195602                              | 6192  | No | NA | 0  | 0 | Not-determined | Genome-fragment | NA    | 0 |
| S7_k141_174769                              | 5047  | No | NA | 0  | 2 | Not-determined | Genome-fragment | NA    | 0 |
| S7_k141_164723                              | 3354  | No | NA | 0  | 4 | Not-determined | Genome-fragment | NA    | 0 |
| S7_k141_52257                               | 2803  | No | NA | 0  | 1 | Not-determined | Genome-fragment | NA    | 0 |
| S7_k141_185133                              | 3905  | No | NA | 0  | 2 | Not-determined | Genome-fragment | NA    | 0 |
| S12-final-viral-combined_k141_294629][full  | 2005  | No | NA | 2  | 0 | Low-quality    | Genome-fragment | 4.21  | 0 |
| S7_k141_205744                              | 1157  | No | NA | 0  | 2 | Not-determined | Genome-fragment | NA    | 0 |
| S7_k141_143942                              | 1170  | No | NA | 0  | 1 | Not-determined | Genome-fragment | NA    | 0 |
| S12_k141_166904                             | 2005  | No | NA | 0  | 3 | Low-quality    | Genome-fragment | 0.84  | 0 |
| S7_k141_41899                               | 1108  | No | NA | 0  | 0 | Not-determined | Genome-fragment | NA    | 0 |
| S7_k141_185234                              | 1347  | No | NA | 0  | 0 | Not-determined | Genome-fragment | NA    | 0 |
| S4-final-viral-combined_k141_102752][full   | 2005  | No | NA | 0  | 0 | Low-quality    | Genome-fragment | 3.1   | 0 |
| S6-final-viral-combined_k141_98890][full    | 2005  | No | NA | 0  | 1 | Low-quality    | Genome-fragment | 1.07  | 0 |
| S6_k141_93550                               | 2005  | No | NA | 2  | 0 | Low-quality    | Genome-fragment | 1.07  | 0 |
| S7-final-viral-combined_k141_4939][full     | 2006  | No | NA | 0  | 2 | Low-quality    | Genome-fragment | 3.03  | 0 |
| S7_k141_11527                               | 1360  | No | NA | 0  | 2 | Not-determined | Genome-fragment | NA    | 0 |
| S7_k141_134198                              | 1177  | No | NA | 0  | 0 | Not-determined | Genome-fragment | NA    | 0 |
| S7_k141_62540                               | 1239  | No | NA | 0  | 1 | Not-determined | Genome-fragment | NA    | 0 |
| S7_k141_154792                              | 1066  | No | NA | 0  | 0 | Not-determined | Genome-fragment | NA    | 0 |
| S7_k141_52375                               | 1512  | No | NA | 0  | 1 | Not-determined | Genome-fragment | NA    | 0 |
| S7_k141_215969                              | 1187  | No | NA | 0  | 2 | Not-determined | Genome-fragment | NA    | 0 |
| S7_k141_185374                              | 1003  | No | NA | 0  | 0 | Not-determined | Genome-fragment | NA    | 0 |
| S7_k141_226169                              | 1244  | No | NA | 0  | 1 | Not-determined | Genome-fragment | NA    | 0 |
| S7_k141_226170                              | 1184  | No | NA | 0  | 0 | Not-determined | Genome-fragment | NA    | 0 |
| S7_k141_154815                              | 3157  | No | NA | 0  | 1 | Not-determined | Genome-fragment | NA    | 0 |
| S7_k141_236292                              | 1475  | No | NA | 0  | 1 | Not-determined | Genome-fragment | NA    | 0 |
| S7_k141_236300                              | 1550  | No | NA | 0  | 1 | Not-determined | Genome-fragment | NA    | 0 |
| S7-final-viral-combined_k141_98834][full    | 2006  | No | NA | 0  | 0 | Low-quality    | Genome-fragment | 1.39  | 0 |
| S7_k141_226202                              | 1064  | No | NA | 0  | 0 | Not-determined | Genome-fragment | NA    | 0 |
| S7_k141_226203                              | 1533  | No | NA | 0  | 1 | Not-determined | Genome-fragment | NA    | 0 |
| S7-final-viral-combined_k141_181104][H2gene | 2006  | No | NA | 1  | 0 | Low-quality    | Genome-fragment | 0.84  | 0 |
| S7_k141_174946                              | 1002  | No | NA | 0  | 0 | Not-determined | Genome-fragment | NA    | 0 |
| S12-final-viral-combined_k141_173406][full  | 2006  | No | NA | 0  | 0 | Low-quality    | Genome-fragment | 4.61  | 0 |
| S12_k141_294861][full                       | 2006  | No | NA | 2  | 0 | Low-quality    | Genome-fragment | 4.23  | 0 |
| S8-final-viral-combined_k141_264244][full   | 2006  | No | NA | 1  | 0 | Low-quality    | Genome-fragment | 2.63  | 0 |
| S7_k141_134342                              | 5571  | No | NA | 0  | 1 | Not-determined | Genome-fragment | NA    | 0 |
| S7_k141_113847                              | 1474  | No | NA | 0  | 0 | Not-determined | Genome-fragment | NA    | 0 |
| S7_k141_52615                               | 3491  | No | NA | 0  | 7 | Not-determined | Genome-fragment | NA    | 0 |
| S9-final-viral-combined_k141_40810][full    | 2007  | No | NA | 0  | 1 | Low-quality    | Genome-fragment | 2.66  | 0 |
| S7_k141_123954                              | 21948 | No | NA | 10 | 0 | Medium-quality | Genome-fragment | 76.08 | 0 |
| S7_k141_42057                               | 1042  | No | NA | 0  | 1 | Not-determined | Genome-fragment | NA    | 0 |
| S7_k141_62663                               | 3448  | No | NA | 0  | 0 | Not-determined | Genome-fragment | NA    | 0 |
| S1-final-viral-combined_k141_198034][full   | 2007  | No | NA | 0  | 1 | Low-quality    | Genome-fragment | 2.85  | 0 |
| S7_k141_185577                              | 3963  | No | NA | 0  | 0 | Not-determined | Genome-fragment | NA    | 0 |
| S7_k141_205989                              | 2206  | No | NA | 0  | 0 | Not-determined | Genome-fragment | NA    | 0 |
| S7_k141_62688                               | 1633  | No | NA | 0  | 1 | Not-determined | Genome-fragment | NA    | 0 |
| S7_k141_144216                              | 2179  | No | NA | 0  | 0 | Not-determined | Genome-fragment | NA    | 0 |
| S7_k141_42087                               | 1361  | No | NA | 0  | 1 | Not-determined | Genome-fragment | NA    | 0 |
| S7-final-viral-combined_k141_196284][full   | 2007  | No | NA | 0  | 0 | Low-quality    | Genome-fragment | 3.07  | 0 |
| S7_k141_1459                                | 1517  | No | NA | 0  | 1 | Not-determined | Genome-fragment | NA    | 0 |
| S7_k141_175071                              | 1354  | No | NA | 0  | 0 | Not-determined | Genome-fragment | NA    | 0 |
| S7_k141_226385                              | 1765  | No | NA | 0  | 0 | Not-determined | Genome-fragment | NA    | 0 |
| S7_k141_124040                              | 3249  | No | NA | 0  | 0 | Not-determined | Genome-fragment | NA    | 0 |
| S7_k141_1467                                | 2007  | No | NA | 0  | 1 | Low-quality    | Genome-fragment | 5.66  | 0 |
| S7_k141_21530                               | 1048  | No | NA | 0  | 1 | Not-determined | Genome-fragment | NA    | 0 |
| S7_k141_195964                              | 4541  | No | NA | 0  | 2 | Not-determined | Genome-fragment | NA    | 0 |
| S7_k141_236522                              | 1099  | No | NA | 0  | 0 | Not-determined | Genome-fragment | NA    | 0 |
| S7_k141_21540                               | 1214  | No | NA | 0  | 0 | Not-determined | Genome-fragment | NA    | 0 |
| S7_k141_195986                              | 2647  | No | NA | 0  | 3 | Not-determined | Genome-fragment | NA    | 0 |
| S7_k141_32251                               | 2019  | No | NA | 0  | 0 | Not-determined | Genome-fragment | NA    | 0 |
| S7_k141_103552                              | 1003  | No | NA | 0  | 1 | Not-determined | Genome-fragment | NA    | 0 |
| S7_k141_11612                               | 5367  | No | NA | 0  | 1 | Not-determined | Genome-fragment | NA    | 0 |
| S7_k141_11612                               | 1014  | No | NA | 0  | 0 | Not-determined | Genome-fragment | NA    | 0 |
| S7_k141_92987                               | 1892  | No | NA | 0  | 1 | Not-determined | Genome-fragment | NA    | 0 |
| S7_k141_165060                              | 3550  | No | NA | 0  | 1 | Not-determined | Genome-fragment | NA    | 0 |
| S7_k141_11627                               | 1524  | No | NA | 0  | 1 | Not-determined | Genome-fragment | NA    | 0 |
| S7_k141_52738                               | 3211  | No | NA | 0  | 3 | Not-determined | Genome-fragment | NA    | 0 |
| S8-final-viral-combined_k141_163908][full   | 2007  | No | NA | 0  | 1 | Low-quality    | Genome-fragment | 1.06  | 0 |
| S7_k141_103620                              | 3314  | No | NA | 0  | 2 | Not-determined | Genome-fragment | NA    | 0 |
| S7_k141_32321                               | 1461  | No | NA | 0  | 0 | Not-determined | Genome-fragment | NA    | 0 |
| S8-final-viral-combined_k141_119005][full   | 2007  | No | NA | 0  | 1 | Low-quality    | Genome-fragment | 3.06  | 0 |
| S7_k141_165147                              | 1378  | No | NA | 0  | 0 | Not-determined | Genome-fragment | NA    | 0 |
| S7_k141_114208                              | 1219  | No | NA | 0  | 2 | Not-determined | Genome-fragment | NA    | 0 |
| S7_k141_134519                              | 1038  | No | NA | 0  | 1 | Not-determined | Genome-fragment | NA    | 0 |
| S8_k141_108030                              | 2007  | No | NA | 0  | 0 | Low-quality    | Genome-fragment | 3.69  | 0 |
| S7_k141_144293                              | 2210  | No | NA | 0  | 0 | Not-determined | Genome-fragment | NA    | 0 |
| S7_k141_62880                               | 3115  | No | NA | 0  | 1 | Not-determined | Genome-fragment | NA    | 0 |
| S7_k141_226530                              | 2121  | No | NA | 0  | 2 | Not-determined | Genome-fragment | NA    | 0 |
| S11-final-viral-combined_k141_151959][full  | 2008  | No | NA | 1  | 0 | Low-quality    | Genome-fragment | 2.98  | 0 |
| S7_k141_216107                              | 1252  | No | NA | 0  | 0 | Not-determined | Genome-fragment | NA    | 0 |
| S7_k141_175123                              | 4407  | No | NA | 0  | 3 | Not-determined | Genome-fragment | NA    | 0 |
| S7_k141_206225                              | 3074  | No | NA | 0  | 2 | Not-determined | Genome-fragment | NA    | 0 |
| S7_k141_93128                               | 1344  | No | NA | 0  | 3 | Not-determined | Genome-fragment | NA    | 0 |
| S7_k141_165249                              | 1439  | No | NA | 0  | 1 | Not-determined | Genome-fragment | NA    | 0 |
| S7-final-viral-combined_k141_75514][full    | 2008  | No | NA | 0  | 2 | Low-quality    | Genome-fragment | 0.92  | 0 |
| S7_k141_124231                              | 6493  | No | NA | 0  | 3 | Not-determined | Genome-fragment | NA    | 0 |
| S7_k141_236720                              | 1198  | No | NA | 0  | 1 | Not-determined | Genome-fragment | NA    | 0 |
| S7_k141_62960                               | 2858  | No | NA | 0  | 0 | Not-determined | Genome-fragment | NA    | 0 |
| S7_k141_165297                              | 1229  | No | NA | 0  | 1 | Not-determined | Genome-fragment | NA    | 0 |
| S12-final-viral-combined_k141_168166][full  | 2008  | No | NA | 0  | 0 | Low-quality    | Genome-fragment | 4.45  | 0 |
| S12-final-viral-combined_k141_124726][full  | 2008  | No | NA | 0  | 0 | Low-quality    | Genome-fragment | 1.47  | 0 |
| S7_k141_236789                              | 1367  | No | NA | 0  | 0 | Not-determined | Genome-fragment | NA    | 0 |
| S7_k141_185893                              | 4323  | No | NA | 0  | 0 | Not-determined | Genome-fragment | NA    | 0 |
| S17-final-viral-combined_k141_219374][full  | 2009  | No | NA | 0  | 0 | Low-quality    | Genome-fragment | 4.64  | 0 |
| S7_k141_124341                              | 2011  | No | NA | 0  | 0 | Not-determined | Genome-fragment | NA    | 0 |
| S2-final-viral-combined_k141_130287][full   | 2009  | No | NA | 0  | 1 | Low-quality    | Genome-fragment | 1.36  | 0 |
| S7_k141_124350                              | 1376  | No | NA | 0  | 1 | Not-determined | Genome-fragment | NA    | 0 |
| S8-final-viral-combined_k141_131211][H2gene | 2010  | No | NA | 2  | 0 | Low-quality    | Genome-fragment | 4.45  | 0 |
| S7_k141_226655                              | 1130  | No | NA | 0  | 1 | Not-determined | Genome-fragment | NA    | 0 |
| S11-final-viral-combined_k141_194172][full  | 2010  | No | NA | 1  | 0 | Low-quality    | Genome-fragment | 4.63  | 0 |
| S11-final-viral-combined_k141_61014][full   | 2010  | No | NA | 0  | 0 | Low-quality    | Genome-fragment | 4.41  | 0 |
| S7_k141_32534                               | 1259  | No | NA | 0  | 2 | Not-determined | Genome-fragment | NA    | 0 |
| S7_k141_144401                              | 6173  | No | NA | 0  | 2 | Not-determined | Genome-fragment | NA    | 0 |
| S7_k141_1794                                | 1072  | No | NA | 0  | 0 | Not-determined | Genome-fragment | NA    | 0 |
| S7_k141_42490                               | 7130  | No | NA | 0  | 0 | Not-determined | Genome-fragment | NA    | 0 |
| S7_k141_124384                              | 1067  | No | NA | 0  | 0 | Not-determined | Genome-fragment | NA    | 0 |
| S1-final-viral-combined_k141_289508][full   | 2010  | No | NA | 0  | 1 | Low-quality    | Genome-fragment | 3.61  | 0 |
| S7_k141_83308                               | 1361  | No | NA | 0  | 0 | Not-determined | Genome-fragment | NA    | 0 |
| S7_k141_236918                              | 1265  | No | NA | 0  | 2 | Not-determined | Genome-fragment | NA    | 0 |
| S7_k141_185989                              | 7296  | No | NA | 0  | 6 | Not-determined | Genome-fragment | NA    | 0 |
| S7_k141_42533                               | 1258  | No | NA | 0  | 0 | Not-determined | Genome-fragment | NA    | 0 |
| S1_k141_376779                              | 2010  | No | NA | 0  | 1 | Low-quality    | Genome-fragment | 3.05  | 0 |
| S7-final-viral-combined_k141_221134][full   | 2010  | No | NA | 0  | 1 | Low-quality    | Genome-fragment | 0.95  | 0 |
| S7_k141_226765                              | 2706  | No | NA | 0  | 1 | Not-determined | Genome-fragment | NA    | 0 |
| S7_k141_144425                              | 1016  | No | NA | 0  | 0 | Not-determined | Genome-fragment | NA    | 0 |
| S7_k141_21803                               | 2453  | No | NA | 0  | 0 | Not-determined | Genome-fragment | NA    | 0 |
| S7_k141_42591                               | 2173  | No | NA | 0  | 0 | Not-determined | Genome-fragment | NA    | 0 |
| S7_k141_206452                              | 1002  | No | NA | 0  | 0 | Not-determined | Genome-fragment | NA    | 0 |
| S7_k141_196204                              | 1070  | No | NA | 0  | 0 | Not-determined | Genome-fragment | NA    | 0 |
| S17-final-viral-combined_k141_68064][full   | 2010  | No | NA | 0  | 0 | Low-quality    | Genome-fragment | 2.03  | 0 |
| S7_k141_216305                              | 1885  | No | NA | 0  | 0 | Not-determined | Genome-fragment | NA    | 0 |
| S7_k141_206500                              | 1201  | No | NA | 0  | 1 | Not-determined | Genome-fragment | NA    | 0 |
| S7_k141_114456                              | 1087  | No | NA | 0  | 1 | Not-determined | Genome-fragment | NA    | 0 |
| S7_k141_21871                               | 3275  | No | NA | 0  | 0 | Not-determined | Genome-fragment | NA    | 0 |
| S7_k141_237073                              | 2793  | No | NA | 0  | 2 | Not-determined | Genome-fragment | NA    | 0 |
| S17-final-viral-combined_k141_257955][full  | 2010  | No | NA | 1  | 0 | Low-quality    | Genome-fragment | 2.34  | 0 |
| S7_k141_186133                              | 1135  | No | NA | 0  | 0 | Not-determined | Genome-fragment | NA    | 0 |
| S7_k141_114508                              | 1861  | No | NA | 0  | 0 | Not-determined | Genome-fragment | NA    | 0 |
| S7_k141_1914                                | 6790  | No | NA | 0  | 5 | Not-determined | Genome-fragment | NA    | 0 |
| S2-final-viral-combined_k141_31180][full    | 2010  | No | NA | 0  | 0 | Low-quality    | Genome-fragment | 2.14  | 0 |
| S4_k141_20296                               | 2010  | No | NA | 0  | 0 | Low-quality    | Genome-fragment | 2.01  | 0 |
| S7_k141_42726                               | 3961  | No | NA | 0  | 0 | Not-determined | Genome-fragment | NA    | 0 |
| S9-final-viral-combined_k141_13369][full    | 2011  | No | NA | 0  | 1 | Low-quality    | Genome-fragment | 1.82  | 0 |
| S7_k141_32778                               | 1174  | No | NA | 0  | 1 | Not-determined | Genome-fragment | NA    | 0 |
| S7_k141_114543                              | 3388  | No | NA | 0  | 1 | Not-determined | Genome-fragment | NA    | 0 |
| S7_k141_175522                              | 1252  | No | NA | 0  | 0 | Not-determined | Genome-fragment | NA    | 0 |
| S7_k141_226914                              | 1653  | No | NA | 0  | 2 | Not-determined | Genome-fragment | NA    | 0 |
| S7_k141_196382                              | 1154  | No | NA | 0  | 0 | Not-determined | Genome-fragment | NA    | 0 |
| S7_k141_226935                              | 1616  | No | NA | 0  | 1 | Not-determined | Genome-fragment | NA    | 0 |
| S7_k141_144605                              | 1120  | No | NA | 0  | 1 | Not-determined | Genome-fragment | NA    | 0 |
| S11-final-viral-combined_k141_251130][full  | 2011  | No | NA | 0  | 0 | Low-quality    | Genome-fragment | 1.63  | 0 |
| S7_k141_114565                              | 1048  | No | NA | 0  |   |                |                 |       |   |



|                                               |      |     |     |   |    |                |                 |                 |       |
|-----------------------------------------------|------|-----|-----|---|----|----------------|-----------------|-----------------|-------|
| S7_k141_104284                                | 1262 | No  | NA  | 0 | 1  | Not-determined | Genome-fragment | NA              | 0     |
| S7_k141_196499                                | 1696 | No  | NA  | 0 | 0  | Not-determined | Genome-fragment | NA              | 0     |
| S7_k141_196500                                | 1412 | No  | NA  | 0 | 0  | Not-determined | Genome-fragment | NA              | 0     |
| S7_k141_83448                                 | 4430 | No  | NA  | 0 | 0  | Not-determined | Genome-fragment | NA              | 0     |
| S7_k141_206841                                | 1221 | No  | NA  | 0 | 0  | 1              | Not-determined  | Genome-fragment | NA    |
| S12_k141_377707                               | 2012 | No  | NA  | 0 | 1  | Low-quality    | Genome-fragment | NA              | 0.34  |
| S7_k141_22188                                 | 1167 | No  | NA  | 0 | 0  | Not-determined | Genome-fragment | NA              | 0     |
| S7_k141_237194                                | 1762 | No  | NA  | 0 | 0  | 1              | Not-determined  | Genome-fragment | NA    |
| S4-final-viral-combined_k141_106632  full     | 2012 | No  | NA  | 0 | 2  | Low-quality    | Genome-fragment | NA              | 3.47  |
| S7_k141_2173                                  | 5629 | No  | NA  | 0 | 0  | Not-determined | Genome-fragment | NA              | 0     |
| S6-final-viral-combined_k141_82447  full      | 2012 | No  | NA  | 0 | 0  | Low-quality    | Genome-fragment | NA              | 2.13  |
| S7_k141_83466                                 | 1291 | No  | NA  | 0 | 0  | 1              | Not-determined  | Genome-fragment | NA    |
| S7_k141_2200                                  | 1201 | No  | NA  | 0 | 2  | Not-determined | Genome-fragment | NA              | 0     |
| S7_k141_216674                                | 1485 | No  | NA  | 0 | 0  | Not-determined | Genome-fragment | NA              | 0     |
| S7_k141_53338                                 | 1884 | No  | NA  | 8 | 0  | Medium-quality | Genome-fragment | NA              | 72.45 |
| S7_k141_15560                                 | 1354 | No  | NA  | 0 | 0  | Not-determined | Genome-fragment | NA              | 0     |
| S7_k141_186427                                | 1124 | No  | NA  | 0 | 0  | Not-determined | Genome-fragment | NA              | 0     |
| S7_k141_134970                                | 1772 | No  | NA  | 0 | 0  | 1              | Not-determined  | Genome-fragment | NA    |
| S7_k141_237236                                | 1408 | No  | NA  | 0 | 1  | Not-determined | Genome-fragment | NA              | 0     |
| S7_k141_7924                                  | 3050 | No  | NA  | 0 | 0  | 1              | Not-determined  | Genome-fragment | NA    |
| S7_k141_155640                                | 1730 | No  | NA  | 0 | 0  | Not-determined | Genome-fragment | NA              | 0     |
| S7_k141_53382                                 | 1189 | No  | NA  | 0 | 0  | Not-determined | Genome-fragment | NA              | 0     |
| S7_k141_53426                                 | 1207 | No  | NA  | 0 | 0  | 1              | Not-determined  | Genome-fragment | NA    |
| S7_k141_206904                                | 1361 | No  | NA  | 0 | 0  | 1              | Not-determined  | Genome-fragment | NA    |
| S7_k141_22302                                 | 2860 | No  | NA  | 0 | 0  | 1              | Not-determined  | Genome-fragment | NA    |
| S7_k141_155680                                | 3157 | No  | NA  | 0 | 0  | Not-determined | Genome-fragment | NA              | 0     |
| S7_k141_12316                                 | 1113 | No  | NA  | 0 | 0  | 1              | Not-determined  | Genome-fragment | NA    |
| S7_k141_53445                                 | 2562 | No  | NA  | 0 | 2  | Not-determined | Genome-fragment | NA              | 0     |
| S7_k141_227292                                | 2355 | No  | NA  | 0 | 0  | Not-determined | Genome-fragment | NA              | 0     |
| S7_k141_165760                                | 1361 | No  | NA  | 0 | 0  | 1              | Not-determined  | Genome-fragment | NA    |
| S7_k141_63541                                 | 3234 | No  | NA  | 0 | 0  | 3              | Not-determined  | Genome-fragment | NA    |
| S7_k141_2306                                  | 1005 | No  | NA  | 0 | 1  | Not-determined | Genome-fragment | NA              | 0     |
| S7_k141_43059                                 | 9077 | No  | NA  | 0 | 9  | Not-determined | Genome-fragment | NA              | 0     |
| S11-final-viral-combined_k141_121631  full    | 2013 | No  | NA  | 1 | 0  | Low-quality    | Genome-fragment | NA              | 1.27  |
| S4-final-viral-combined_k141_79258  full      | 2013 | No  | NA  | 2 | 0  | Low-quality    | Genome-fragment | NA              | 4.76  |
| S7_k141_124859                                | 1066 | No  | NA  | 0 | 0  | Not-determined | Genome-fragment | NA              | 0     |
| S5-final-viral-combined_k141_37482  full      | 2013 | Yes | 483 | 1 | 0  | Low-quality    | Genome-fragment | NA              | 0.1   |
| S7_k141_144942                                | 1644 | No  | NA  | 0 | 0  | Not-determined | Genome-fragment | NA              | 0     |
| S5-final-viral-combined_k141_203352  full     | 2013 | No  | NA  | 1 | 0  | Low-quality    | Genome-fragment | NA              | 4.36  |
| S2-final-viral-combined_k141_208778  full     | 2013 | No  | NA  | 0 | 0  | Low-quality    | Genome-fragment | NA              | 4.12  |
| S7_k141_216836                                | 2554 | No  | NA  | 0 | 0  | 1              | Not-determined  | Genome-fragment | NA    |
| S4-final-viral-combined_k141_101360  full     | 2013 | No  | NA  | 2 | 0  | Low-quality    | Genome-fragment | NA              | 5.42  |
| S7_k141_93692                                 | 3185 | No  | NA  | 0 | 2  | Not-determined | Genome-fragment | NA              | 0     |
| S7_k141_53525                                 | 2227 | No  | NA  | 0 | 2  | Not-determined | Genome-fragment | NA              | 0     |
| S7_k141_155782                                | 2133 | No  | NA  | 0 | 13 | Not-determined | Genome-fragment | NA              | 0     |
| S7_k141_124913                                | 1968 | No  | NA  | 0 | 0  | 1              | Not-determined  | Genome-fragment | NA    |
| S7_k141_63637                                 | 3264 | No  | NA  | 0 | 0  | 3              | Not-determined  | Genome-fragment | NA    |
| S7_k141_135022                                | 4082 | No  | NA  | 0 | 0  | 1              | Not-determined  | Genome-fragment | NA    |
| S7_k141_53725                                 | 2868 | No  | NA  | 0 | 0  | Not-determined | Genome-fragment | NA              | 0     |
| S4_k141_155997                                | 2013 | No  | NA  | 0 | 0  | Low-quality    | Genome-fragment | NA              | 2.23  |
| S7_k141_63710                                 | 4232 | No  | NA  | 0 | 3  | Not-determined | Genome-fragment | NA              | 0     |
| S7_k141_114887                                | 5066 | No  | NA  | 0 | 0  | Not-determined | Genome-fragment | NA              | 0     |
| S7_k141_145014                                | 1376 | No  | NA  | 0 | 0  | Not-determined | Genome-fragment | NA              | 0     |
| S4_k141_94670                                 | 2013 | No  | NA  | 0 | 0  | Low-quality    | Genome-fragment | NA              | 3.36  |
| S7_k141_186726                                | 2029 | No  | NA  | 0 | 0  | Not-determined | Genome-fragment | NA              | 0     |
| S7_k141_63760                                 | 1852 | No  | NA  | 0 | 0  | Not-determined | Genome-fragment | NA              | 0     |
| S7_k141_155915                                | 1374 | No  | NA  | 0 | 0  | Not-determined | Genome-fragment | NA              | 0     |
| S7_k141_63770                                 | 1910 | No  | NA  | 0 | 0  | 1              | Not-determined  | Genome-fragment | NA    |
| S8-final-viral-combined_k141_20809  full      | 2014 | No  | NA  | 0 | 1  | Low-quality    | Genome-fragment | NA              | 1.29  |
| S7_k141_207711                                | 1004 | No  | NA  | 0 | 0  | 1              | Not-determined  | Genome-fragment | NA    |
| S1_k141_221981                                | 2014 | No  | NA  | 1 | 0  | Low-quality    | Genome-fragment | NA              | 2.49  |
| S7_k141_84132                                 | 2014 | No  | NA  | 2 | 0  | Low-quality    | Genome-fragment | NA              | 5     |
| S7_k141_227570                                | 2075 | No  | NA  | 0 | 0  | Not-determined | Genome-fragment | NA              | 0     |
| S12-final-viral-combined_k141_82555  lit2gene | 2014 | No  | NA  | 1 | 0  | Low-quality    | Genome-fragment | NA              | 5.18  |
| S7_k141_12640                                 | 3333 | No  | NA  | 0 | 2  | Not-determined | Genome-fragment | NA              | 0     |
| S7_k141_114958                                | 1230 | No  | NA  | 0 | 0  | Not-determined | Genome-fragment | NA              | 0     |
| S7_k141_175821                                | 1520 | No  | NA  | 0 | 0  | Not-determined | Genome-fragment | NA              | 0     |
| S7_k141_2408                                  | 1067 | No  | NA  | 0 | 0  | Not-determined | Genome-fragment | NA              | 0     |
| S7_k141_216877                                | 1219 | No  | NA  | 0 | 0  | Not-determined | Genome-fragment | NA              | 0     |
| S7_k141_83935                                 | 1155 | No  | NA  | 0 | 0  | Not-determined | Genome-fragment | NA              | 0     |
| S7_k141_227620                                | 1633 | No  | NA  | 0 | 0  | Not-determined | Genome-fragment | NA              | 0     |
| S7_k141_115001                                | 1084 | No  | NA  | 0 | 1  | Not-determined | Genome-fragment | NA              | 0     |
| S1-final-viral-combined_k141_112272  full     | 2015 | No  | NA  | 0 | 0  | Low-quality    | Genome-fragment | NA              | 1.89  |
| S5-final-viral-combined_k141_70800  full      | 2015 | No  | NA  | 2 | 0  | Low-quality    | Genome-fragment | NA              | 1.09  |
| S7_k141_165998                                | 1071 | No  | NA  | 0 | 1  | Not-determined | Genome-fragment | NA              | 0     |
| S7_k141_2678                                  | 4747 | No  | NA  | 0 | 2  | Not-determined | Genome-fragment | NA              | 0     |
| S7_k141_43413                                 | 1006 | No  | NA  | 0 | 0  | Not-determined | Genome-fragment | NA              | 0     |
| S12-final-viral-combined_k141_251702  full    | 2015 | No  | NA  | 2 | 0  | Low-quality    | Genome-fragment | NA              | 5.37  |
| S7_k141_156084                                | 1012 | No  | NA  | 0 | 0  | Not-determined | Genome-fragment | NA              | 0     |
| S7_k141_135176                                | 1100 | No  | NA  | 0 | 0  | 1              | Not-determined  | Genome-fragment | NA    |
| S7_k141_237746                                | 1193 | No  | NA  | 0 | 0  | Not-determined | Genome-fragment | NA              | 0     |
| S7_k141_125078                                | 1047 | No  | NA  | 0 | 0  | Not-determined | Genome-fragment | NA              | 0     |
| S12-final-viral-combined_k141_270984  full    | 2015 | No  | NA  | 0 | 0  | Low-quality    | Genome-fragment | NA              | 2.15  |
| S7_k141_156098                                | 1736 | No  | NA  | 0 | 2  | Not-determined | Genome-fragment | NA              | 0     |
| S7_k141_84021                                 | 1275 | No  | NA  | 0 | 0  | Not-determined | Genome-fragment | NA              | 0     |
| S7_k141_237768                                | 1094 | No  | NA  | 0 | 0  | 1              | Not-determined  | Genome-fragment | NA    |
| S7_k141_63914                                 | 1960 | No  | NA  | 0 | 2  | Not-determined | Genome-fragment | NA              | 0     |
| S7_k141_207381                                | 2663 | No  | NA  | 0 | 0  | Not-determined | Genome-fragment | NA              | 0     |
| S7_k141_104654                                | 3235 | No  | NA  | 0 | 0  | Not-determined | Genome-fragment | NA              | 0     |
| S7_k141_43519                                 | 5657 | No  | NA  | 0 | 4  | Not-determined | Genome-fragment | NA              | 0     |
| S7_k141_63939                                 | 1240 | No  | NA  | 0 | 0  | Not-determined | Genome-fragment | NA              | 0     |
| S7_k141_115144                                | 1621 | No  | NA  | 0 | 0  | Not-determined | Genome-fragment | NA              | 0     |
| S7_k141_12836                                 | 1019 | No  | NA  | 0 | 0  | 1              | Not-determined  | Genome-fragment | NA    |
| S6-final-viral-combined_k141_51965  full      | 2015 | No  | NA  | 1 | 0  | Low-quality    | Genome-fragment | NA              | 2.54  |
| S8-final-viral-combined_k141_139032  full     | 2015 | No  | NA  | 0 | 0  | Low-quality    | Genome-fragment | NA              | 1.89  |
| S1-final-viral-combined_k141_232966  full     | 2016 | No  | NA  | 1 | 0  | Low-quality    | Genome-fragment | NA              | 4.33  |
| S7-final-viral-combined_k141_148167  full     | 2016 | No  | NA  | 1 | 0  | Low-quality    | Genome-fragment | NA              | 0     |
| S7_k141_12861                                 | 1059 | No  | NA  | 0 | 0  | Not-determined | Genome-fragment | NA              | 0     |
| S7_k141_227666                                | 1286 | No  | NA  | 0 | 0  | Not-determined | Genome-fragment | NA              | 0     |
| S9-final-viral-combined_k141_113575  full     | 2017 | No  | NA  | 0 | 0  | Low-quality    | Genome-fragment | NA              | 3     |
| S7_k141_43583                                 | 1844 | No  | NA  | 0 | 0  | Not-determined | Genome-fragment | NA              | 0     |
| S11_k141_15080                                | 2017 | No  | NA  | 0 | 0  | Low-quality    | Genome-fragment | NA              | 3.39  |
| S1-final-viral-combined_k141_266985  full     | 2017 | No  | NA  | 0 | 0  | Low-quality    | Genome-fragment | NA              | 3.5   |
| S7_k141_73370                                 | 4323 | No  | NA  | 0 | 0  | 1              | Not-determined  | Genome-fragment | NA    |
| S7-final-viral-combined_k141_153611  full     | 2017 | No  | NA  | 0 | 1  | Low-quality    | Genome-fragment | NA              | 4.53  |
| S7_k141_237931                                | 1101 | No  | NA  | 0 | 0  | Not-determined | Genome-fragment | NA              | 0     |
| S7_k141_166192                                | 1295 | No  | NA  | 0 | 0  | Not-determined | Genome-fragment | NA              | 0     |
| S7_k141_24029                                 | 3423 | No  | NA  | 0 | 0  | Not-determined | Genome-fragment | NA              | 0     |
| S17-final-viral-combined_k141_54506  full     | 2017 | No  | NA  | 0 | 0  | Low-quality    | Genome-fragment | NA              | 4.04  |
| S7_k141_145245                                | 7000 | No  | NA  | 0 | 2  | Not-determined | Genome-fragment | NA              | 0     |
| S7_k141_13489                                 | 1422 | No  | NA  | 0 | 0  | 1              | Not-determined  | Genome-fragment | NA    |
| S7_k141_43678                                 | 1313 | No  | NA  | 0 | 0  | Not-determined | Genome-fragment | NA              | 0     |
| S7_k141_156259                                | 1348 | No  | NA  | 0 | 0  | Not-determined | Genome-fragment | NA              | 0     |
| S7_k141_2782                                  | 5413 | No  | NA  | 0 | 0  | Not-determined | Genome-fragment | NA              | 0     |
| S2_k141_238523                                | 2017 | No  | NA  | 0 | 2  | Low-quality    | Genome-fragment | NA              | 1.05  |
| S7_k141_176153                                | 1383 | No  | NA  | 0 | 0  | Not-determined | Genome-fragment | NA              | 0     |
| S7_k141_135291                                | 1812 | No  | NA  | 0 | 2  | Not-determined | Genome-fragment | NA              | 0     |
| S7_k141_187042                                | 1156 | No  | NA  | 0 | 0  | Not-determined | Genome-fragment | NA              | 0     |
| S7_k141_187273                                | 2339 | No  | NA  | 0 | 0  | 1              | Not-determined  | Genome-fragment | NA    |
| S7_k141_145317                                | 2107 | No  | NA  | 0 | 2  | Not-determined | Genome-fragment | NA              | 0     |
| S7_k141_12991                                 | 1243 | No  | NA  | 0 | 1  | Not-determined | Genome-fragment | NA              | 0     |
| S1-final-viral-combined_k141_186662  full     | 2018 | Yes | 570 | 1 | 0  | Low-quality    | Genome-fragment | NA              | 0.87  |
| S5-final-viral-combined_k141_60429  full      | 2018 | No  | NA  | 1 | 0  | Low-quality    | Genome-fragment | NA              | 4.1   |
| S7_k141_166217                                | 1242 | No  | NA  | 0 | 0  | 1              | Not-determined  | Genome-fragment | NA    |
| S17-final-viral-combined_k141_205710  full    | 2018 | No  | NA  | 0 | 2  | Low-quality    | Genome-fragment | NA              | 1.84  |
| S7_k141_176230                                | 1259 | No  | NA  | 0 | 0  | 1              | Not-determined  | Genome-fragment | NA    |
| S7_k141_237999                                | 1054 | No  | NA  | 0 | 0  | 1              | Not-determined  | Genome-fragment | NA    |
| S2-final-viral-combined_k141_86189  full      | 2018 | No  | NA  | 0 | 0  | Low-quality    | Genome-fragment | NA              | 4.06  |
| S7_k141_125305                                | 1443 | No  | NA  | 0 | 0  | 1              | Not-determined  | Genome-fragment | NA    |
| S7_k141_115297                                | 1606 | No  | NA  | 0 | 0  | 1              | Not-determined  | Genome-fragment | NA    |
| S7_k141_23677                                 | 1178 | No  | NA  | 0 | 0  | Not-determined | Genome-fragment | NA              | 0     |
| S7_k141_238058                                | 2552 | No  | NA  | 0 | 0  | Not-determined | Genome-fragment | NA              | 0     |
| S7_k141_22750                                 | 3877 | No  | NA  | 0 | 2  | Not-determined | Genome-fragment | NA              | 0     |
| S4-final-viral-combined_k141_132131  full     | 2018 | No  | NA  | 0 | 2  | Low-quality    | Genome-fragment | NA              | 6.73  |
| S7_k141_135443                                | 1389 | No  | NA  | 0 | 0  | 1              | Not-determined  | Genome-fragment | NA    |
| S8-final-viral-combined_k141_134225  full     | 2018 | No  | NA  | 0 | 2  | Low-quality    | Genome-fragment | NA              | 3.87  |
| S7_k141_125364                                | 1059 | No  | NA  | 0 | 0  | Not-determined | Genome-fragment | NA              | 0     |
| S9-final-viral-combined_k141_18353  full      | 2019 | No  | NA  | 0 | 2  | Low-quality    | Genome-fragment | NA              | 1.54  |
| S1_k141_105818                                | 2019 | No  | NA  | 0 | 0  | Low-quality    | Genome-fragment | NA              | 1.94  |
| S17-k141_122739                               | 2019 | No  | NA  | 0 | 2  | Low-quality    | Genome-fragment | NA              | 0.59  |
| S7_k141_135498                                | 5533 | No  | NA  | 0 | 0  | 1              | Not-determined  | Genome-fragment | NA    |
| S7_k141_166355                                | 1402 | No  | NA  | 0 | 0  | Not-determined | Genome-fragment | NA              | 0     |
| S7_k141_197509                                | 4845 | No  | NA  | 0 | 2  | Not-determined | Genome-fragment | NA              | 0     |
| S7_k141_104922                                | 6946 | No  | NA  | 0 | 0  | Not-determined | Genome-fragment | NA              | 0     |
| S12-final-viral-combined_k141_240289  full    | 2019 | No  | NA  | 0 | 0  | Low-quality    | Genome-fragment | NA              | 3.04  |
| S7_k141_207829                                | 1550 | No  | NA  | 0 | 0  | 1              |                 |                 |       |



|                                                |       |      |      |   |   |                |                 |    |      |
|------------------------------------------------|-------|------|------|---|---|----------------|-----------------|----|------|
| S7_k141_197751                                 | 1193  | No   | NA   | 0 | 1 | Not-determined | Genome-fragment | NA | 0    |
| S7_k141_197770                                 | 1311  | No   | NA   | 0 | 0 | Not-determined | Genome-fragment | NA | 0    |
| S6-final-viral-combined_k141_120696  full      | 2019  | No   | NA   | 0 | 0 | Low-quality    | Genome-fragment | NA | 4.79 |
| S7_k141_166664                                 | 1004  | No   | NA   | 0 | 1 | Not-determined | Genome-fragment | NA | 0    |
| S7_k141_197792                                 | 1411  | No   | NA   | 0 | 0 | Not-determined | Genome-fragment | NA | 0    |
| S7_k141_238135                                 | 1193  | No   | NA   | 0 | 0 | Not-determined | Genome-fragment | NA | 0    |
| S8-final-viral-combined_k141_159819  full      | 2019  | No   | NA   | 0 | 1 | Low-quality    | Genome-fragment | NA | 0.52 |
| S7_k141_115550                                 | 5646  | No   | NA   | 0 | 1 | Not-determined | Genome-fragment | NA | 0    |
| S7-final-viral-combined_k141_57812  full       | 2020  | No   | NA   | 3 | 0 | Low-quality    | Genome-fragment | NA | 5.21 |
| S7_k141_238335                                 | 4851  | No   | NA   | 0 | 3 | Not-determined | Genome-fragment | NA | 0    |
| S7_k141_22921                                  | 1061  | No   | NA   | 0 | 1 | Not-determined | Genome-fragment | NA | 0    |
| S7_k141_238242                                 | 1261  | No   | NA   | 0 | 0 | Not-determined | Genome-fragment | NA | 0    |
| S7_k141_187453                                 | 5721  | No   | NA   | 0 | 5 | Not-determined | Genome-fragment | NA | 0    |
| S7_k141_64290                                  | 16852 | No   | NA   | 0 | 1 | Not-determined | Genome-fragment | NA | 0    |
| S7_k141_54172                                  | 1189  | No   | NA   | 0 | 1 | Not-determined | Genome-fragment | NA | 0    |
| S7_k141_54185                                  | 2005  | No   | NA   | 0 | 1 | Not-determined | Genome-fragment | NA | 0    |
| S7_k141_3178                                   | 1563  | No   | NA   | 0 | 0 | Not-determined | Genome-fragment | NA | 0    |
| S7_k141_13490                                  | 1364  | No   | NA   | 0 | 1 | Not-determined | Genome-fragment | NA | 0    |
| S1-final-viral-combined_k141_59047  full       | 2021  | No   | NA   | 1 | 0 | Low-quality    | Genome-fragment | NA | 5.28 |
| S7_k141_166744                                 | 1175  | No   | NA   | 0 | 1 | Not-determined | Genome-fragment | NA | 0    |
| S7_k141_208147                                 | 1127  | No   | NA   | 0 | 0 | Not-determined | Genome-fragment | NA | 0    |
| S7_k141_197543                                 | 2069  | No   | NA   | 0 | 0 | Not-determined | Genome-fragment | NA | 0    |
| S7_k141_54242                                  | 3886  | No   | NA   | 0 | 1 | Not-determined | Genome-fragment | NA | 0    |
| S7_k141_73912                                  | 1311  | No   | NA   | 0 | 1 | Not-determined | Genome-fragment | NA | 0    |
| S7_k141_156578                                 | 9969  | No   | NA   | 0 | 1 | Not-determined | Genome-fragment | NA | 0    |
| S7_k141_54152                                  | 1062  | No   | NA   | 0 | 0 | Not-determined | Genome-fragment | NA | 0    |
| S7-final-viral-combined_k141_41915  full       | 2021  | No   | NA   | 0 | 1 | Low-quality    | Genome-fragment | NA | 3.29 |
| S7_k141_23047                                  | 1914  | No   | NA   | 0 | 2 | Not-determined | Genome-fragment | NA | 0    |
| S12-final-viral-combined_k141_81110  full      | 2021  | No   | NA   | 0 | 3 | Low-quality    | Genome-fragment | NA | 1.24 |
| S7_k141_156660                                 | 1437  | No   | NA   | 0 | 0 | Not-determined | Genome-fragment | NA | 0    |
| S2-final-viral-combined_k141_10491  full       | 2021  | No   | NA   | 1 | 0 | Low-quality    | Genome-fragment | NA | 1.22 |
| S7_k141_197896                                 | 1061  | No   | NA   | 0 | 2 | Not-determined | Genome-fragment | NA | 0    |
| S7_k141_23064                                  | 5265  | No   | NA   | 0 | 2 | Not-determined | Genome-fragment | NA | 0    |
| S7_k141_105368                                 | 3109  | No   | NA   | 0 | 1 | Not-determined | Genome-fragment | NA | 0    |
| S7_k141_176854                                 | 4060  | No   | NA   | 0 | 4 | Not-determined | Genome-fragment | NA | 0    |
| S11_k141_31628                                 | 2022  | No   | NA   | 1 | 0 | Low-quality    | Genome-fragment | NA | 3.52 |
| S1_k141_283207                                 | 2022  | No   | NA   | 0 | 1 | Low-quality    | Genome-fragment | NA | 3.82 |
| S7_k141_156711                                 | 10656 | No   | NA   | 0 | 3 | Not-determined | Genome-fragment | NA | 0    |
| S17-final-viral-combined_k141_126508  full     | 2022  | No   | NA   | 0 | 1 | Low-quality    | Genome-fragment | NA | 1.91 |
| S7_k141_145919                                 | 1825  | No   | NA   | 0 | 1 | Not-determined | Genome-fragment | NA | 0    |
| S7_k141_217441                                 | 1205  | No   | NA   | 0 | 1 | Not-determined | Genome-fragment | NA | 0    |
| S7_k141_145939                                 | 1716  | No   | NA   | 0 | 0 | Not-determined | Genome-fragment | NA | 0    |
| S7_k141_64516                                  | 1100  | No   | NA   | 0 | 0 | Not-determined | Genome-fragment | NA | 0    |
| S7_k141_238337                                 | 1429  | No   | NA   | 0 | 2 | Not-determined | Genome-fragment | NA | 0    |
| S7_k141_176909                                 | 7655  | No   | NA   | 0 | 3 | Not-determined | Genome-fragment | NA | 0    |
| S12-final-viral-combined_k141_110448  full     | 2022  | No   | NA   | 0 | 1 | Low-quality    | Genome-fragment | NA | 2.59 |
| S7_k141_176912                                 | 1030  | No   | NA   | 0 | 0 | Not-determined | Genome-fragment | NA | 0    |
| S7_k141_176925                                 | 4860  | No   | NA   | 0 | 1 | Not-determined | Genome-fragment | NA | 0    |
| S7_k141_246098                                 | 1607  | No   | NA   | 0 | 2 | Not-determined | Genome-fragment | NA | 0    |
| S7_k141_166924                                 | 6900  | No   | NA   | 0 | 4 | Not-determined | Genome-fragment | NA | 0    |
| S12_k141_369896                                | 2022  | No   | NA   | 0 | 2 | Low-quality    | Genome-fragment | NA | 1.23 |
| S7_k141_74012                                  | 2321  | No   | NA   | 0 | 0 | Not-determined | Genome-fragment | NA | 0    |
| S8-final-viral-combined_k141_199183  full      | 2022  | No   | NA   | 0 | 0 | Low-quality    | Genome-fragment | NA | 4    |
| S12-final-viral-combined_k141_359083  full     | 2023  | No   | NA   | 0 | 0 | Low-quality    | Genome-fragment | NA | 4.67 |
| S7_k141_125980                                 | 1828  | No   | NA   | 0 | 2 | Not-determined | Genome-fragment | NA | 0    |
| S7_k141_105428                                 | 3357  | No   | NA   | 0 | 2 | Not-determined | Genome-fragment | NA | 0    |
| S8-final-viral-combined_k141_263034  full      | 2023  | Yes  | 1163 | 1 | 1 | Low-quality    | Genome-fragment | NA | 2.07 |
| S5-final-viral-combined_k141_136045  full      | 2024  | No   | NA   | 0 | 0 | Low-quality    | Genome-fragment | NA | 4.94 |
| S7_k141_208414                                 | 1901  | No   | NA   | 0 | 0 | Not-determined | Genome-fragment | NA | 0    |
| S7_k141_156832                                 | 2178  | No   | NA   | 0 | 0 | Not-determined | Genome-fragment | NA | 0    |
| S7_k141_44249                                  | 2557  | No   | NA   | 0 | 1 | Not-determined | Genome-fragment | NA | 0    |
| S7_k141_198108                                 | 4363  | No   | NA   | 0 | 3 | Not-determined | Genome-fragment | NA | 0    |
| S7_k141_126040                                 | 3931  | No   | NA   | 0 | 6 | Not-determined | Genome-fragment | NA | 0    |
| S7_k141_228476                                 | 1262  | No   | NA   | 0 | 1 | Not-determined | Genome-fragment | NA | 0    |
| S12-final-viral-combined_k141_305618  full     | 2024  | No   | NA   | 0 | 0 | Low-quality    | Genome-fragment | NA | 5.86 |
| S7_k141_228507                                 | 1373  | No   | NA   | 0 | 0 | Not-determined | Genome-fragment | NA | 0    |
| S7_k141_228536                                 | 1314  | No   | NA   | 0 | 3 | Not-determined | Genome-fragment | NA | 0    |
| S7_k141_187980                                 | 3142  | No   | NA   | 0 | 0 | Not-determined | Genome-fragment | NA | 0    |
| S12-final-viral-combined_k141_127701  full     | 2024  | No   | NA   | 0 | 1 | Low-quality    | Genome-fragment | NA | 0.88 |
| S7_k141_238691                                 | 1423  | No   | NA   | 0 | 1 | Not-determined | Genome-fragment | NA | 0    |
| S4-final-viral-combined_k141_140224  full      | 2024  | No   | NA   | 0 | 0 | Low-quality    | Genome-fragment | NA | 3.2  |
| S7_k141_177092                                 | 1277  | No   | NA   | 0 | 0 | Not-determined | Genome-fragment | NA | 0    |
| S4_k141_45879                                  | 2024  | No   | NA   | 0 | 0 | Low-quality    | Genome-fragment | NA | 0.37 |
| S7_k141_3553                                   | 3874  | No   | NA   | 0 | 7 | Not-determined | Genome-fragment | NA | 0    |
| S7_k141_188042                                 | 5125  | No   | NA   | 0 | 4 | Not-determined | Genome-fragment | NA | 0    |
| S7_k141_105663                                 | 1241  | No   | NA   | 0 | 4 | Not-determined | Genome-fragment | NA | 0    |
| S9-final-viral-combined_k141_108725  full      | 2025  | No   | NA   | 3 | 0 | Low-quality    | Genome-fragment | NA | 4.29 |
| S7_k141_116162                                 | 1028  | No   | NA   | 0 | 2 | Not-determined | Genome-fragment | NA | 0    |
| S11-final-viral-combined_k141_322573  full     | 2025  | No   | NA   | 0 | 1 | Low-quality    | Genome-fragment | NA | 1.27 |
| S7_k141_146270                                 | 3659  | No   | NA   | 0 | 1 | Not-determined | Genome-fragment | NA | 0    |
| S7_k141_198217                                 | 12412 | No   | NA   | 0 | 0 | Not-determined | Genome-fragment | NA | 0    |
| S1-final-viral-combined_k141_23698  full       | 2025  | No   | NA   | 1 | 0 | Low-quality    | Genome-fragment | NA | 4.79 |
| S7_k141_44459                                  | 1220  | No   | NA   | 0 | 0 | Not-determined | Genome-fragment | NA | 0    |
| S3_k141_130082                                 | 2025  | No   | NA   | 0 | 1 | Low-quality    | Genome-fragment | NA | 4.36 |
| S7_k141_198290                                 | 1044  | No   | NA   | 0 | 2 | Not-determined | Genome-fragment | NA | 0    |
| S7_k141_146374                                 | 2531  | No   | NA   | 0 | 2 | Not-determined | Genome-fragment | NA | 0    |
| S7_k141_34554                                  | 3793  | No   | NA   | 0 | 0 | Not-determined | Genome-fragment | NA | 0    |
| S7_k141_157033                                 | 1738  | No   | NA   | 0 | 0 | Not-determined | Genome-fragment | NA | 0    |
| S7_k141_177251                                 | 6189  | No   | NA   | 0 | 2 | Not-determined | Genome-fragment | NA | 0    |
| S7_k141_126288                                 | 3060  | No   | NA   | 0 | 3 | Not-determined | Genome-fragment | NA | 0    |
| S7-final-viral-combined_k141_230863  full      | 2025  | No   | NA   | 0 | 0 | Low-quality    | Genome-fragment | NA | 2.8  |
| S7_k141_167385                                 | 1362  | No   | NA   | 0 | 1 | Not-determined | Genome-fragment | NA | 0    |
| S2-final-viral-combined_k141_123390  full      | 2025  | No   | NA   | 0 | 0 | Low-quality    | Genome-fragment | NA | 3.57 |
| S7_k141_188215                                 | 1122  | No   | NA   | 0 | 0 | Not-determined | Genome-fragment | NA | 0    |
| S7_k141_85120                                  | 1823  | No   | NA   | 0 | 0 | Not-determined | Genome-fragment | NA | 0    |
| S7_k141_34657                                  | 1037  | No   | NA   | 0 | 0 | Not-determined | Genome-fragment | NA | 0    |
| S7_k141_23447                                  | 2724  | No   | NA   | 0 | 1 | Not-determined | Genome-fragment | NA | 0    |
| S7_k141_238990                                 | 1316  | No   | NA   | 0 | 1 | Not-determined | Genome-fragment | NA | 0    |
| S7_k141_351172                                 | 1249  | No   | NA   | 0 | 1 | Not-determined | Genome-fragment | NA | 0    |
| S7_k141_208817                                 | 13409 | No   | NA   | 0 | 8 | Not-determined | Genome-fragment | NA | 0    |
| S7_k141_217707                                 | 1115  | No   | NA   | 0 | 1 | Not-determined | Genome-fragment | NA | 0    |
| S7_k141_352020                                 | 1015  | No   | NA   | 0 | 1 | Not-determined | Genome-fragment | NA | 0    |
| S7_k141_74694                                  | 2154  | No   | NA   | 0 | 0 | Not-determined | Genome-fragment | NA | 0    |
| S6-final-viral-combined_k141_113903  full      | 2025  | No   | NA   | 0 | 0 | Low-quality    | Genome-fragment | NA | 1.15 |
| S7_k141_208825                                 | 1217  | No   | NA   | 0 | 2 | Not-determined | Genome-fragment | NA | 0    |
| S7_k141_34743                                  | 1066  | No   | NA   | 0 | 0 | Not-determined | Genome-fragment | NA | 0    |
| S7_k141_95253                                  | 1250  | No   | NA   | 0 | 0 | Not-determined | Genome-fragment | NA | 0    |
| S7_k141_146590                                 | 3991  | No   | NA   | 0 | 0 | Not-determined | Genome-fragment | NA | 0    |
| S7_k141_188116                                 | 2736  | No   | NA   | 0 | 0 | Not-determined | Genome-fragment | NA | 0    |
| S7_k141_146591                                 | 16112 | No   | NA   | 0 | 8 | Not-determined | Genome-fragment | NA | 0    |
| S7_k141_34805                                  | 1167  | No   | NA   | 0 | 1 | Not-determined | Genome-fragment | NA | 0    |
| S7_k141_136365                                 | 3715  | No   | NA   | 0 | 0 | Not-determined | Genome-fragment | NA | 0    |
| S7_k141_54651                                  | 2121  | No   | NA   | 0 | 0 | Not-determined | Genome-fragment | NA | 0    |
| S7_k141_34809                                  | 3388  | No   | NA   | 0 | 3 | Not-determined | Genome-fragment | NA | 0    |
| S7_k141_208907                                 | 4028  | No   | NA   | 0 | 0 | Not-determined | Genome-fragment | NA | 0    |
| S7_k141_198389                                 | 3261  | No   | NA   | 0 | 1 | Not-determined | Genome-fragment | NA | 0    |
| S6-final-viral-combined_k141_22208  full       | 2025  | No   | NA   | 1 | 0 | Low-quality    | Genome-fragment | NA | 4.75 |
| S7_k141_44744                                  | 1616  | No   | NA   | 0 | 0 | Not-determined | Genome-fragment | NA | 0    |
| S1-final-viral-combined_k141_234242  1/2genome | 2026  | No   | NA   | 2 | 0 | Low-quality    | Genome-fragment | NA | 5.07 |
| S7_k141_146615                                 | 5498  | No   | NA   | 0 | 1 | Not-determined | Genome-fragment | NA | 0    |
| S7_k141_105812                                 | 1113  | No   | NA   | 0 | 2 | Not-determined | Genome-fragment | NA | 0    |
| S7_k141_85158                                  | 1527  | No   | NA   | 0 | 0 | Not-determined | Genome-fragment | NA | 0    |
| S2-final-viral-combined_k141_211925  full      | 2026  | No   | NA   | 0 | 0 | Low-quality    | Genome-fragment | NA | 3.85 |
| S7_k141_136441                                 | 3845  | No   | NA   | 0 | 0 | Not-determined | Genome-fragment | NA | 0    |
| S7_k141_188363                                 | 1806  | No   | NA   | 0 | 0 | Not-determined | Genome-fragment | NA | 0    |
| S7_k141_54704                                  | 1007  | No   | NA   | 0 | 1 | Not-determined | Genome-fragment | NA | 0    |
| S7_k141_198446                                 | 1859  | No   | NA   | 0 | 1 | Not-determined | Genome-fragment | NA | 0    |
| S4-final-viral-combined_k141_2922  full        | 2026  | No   | NA   | 0 | 0 | Low-quality    | Genome-fragment | NA | 4.63 |
| S7_k141_146669                                 | 2097  | No   | NA   | 0 | 0 | Not-determined | Genome-fragment | NA | 0    |
| S7_k141_157247                                 | 1520  | No   | NA   | 0 | 1 | Not-determined | Genome-fragment | NA | 0    |
| S7_k141_126595                                 | 1353  | No   | NA   | 0 | 1 | Not-determined | Genome-fragment | NA | 0    |
| S7_k141_238150                                 | 2338  | No   | NA   | 0 | 1 | Not-determined | Genome-fragment | NA | 0    |
| S7-final-viral-combined_k141_210738  full      | 2027  | No   | NA   | 0 | 2 | Low-quality    | Genome-fragment | NA | 2.32 |
| S7_k141_208984                                 | 1634  | No   | NA   | 0 | 4 | Not-determined | Genome-fragment | NA | 3.02 |
| S17-final-viral-combined_k141_83987  full      | 2027  | No   | NA   | 0 | 0 | Low-quality    | Genome-fragment | NA | 0    |
| S7_k141_34870                                  | 3558  | No   | NA   | 0 | 2 | Not-determined | Genome-fragment | NA | 0    |
| S7_k141_34872                                  | 1057  | No   | NA   | 0 | 0 | Not-determined | Genome-fragment | NA | 0    |
| S7_k141_35432                                  | 1032  | No   | NA   | 0 | 2 | Not-determined | Genome-fragment | NA | 0    |
| S7_k141_188467                                 | 2707  | No   | NA   | 0 | 1 | Not-determined | Genome-fragment | NA | 0    |
| S12-final-viral-combined_k141_239987  full     | 2027  | No   | NA   | 0 | 1 | Low-quality    | Genome-fragment | NA | 3.01 |
| S7_k141_188476                                 | 1028  | No   | NA   | 0 | 1 | Not-determined | Genome-fragment | NA | 0    |
| S2-final-viral-combined_k141_50146  full       | 2027  | No   | NA   | 0 | 0 | Low-quality    | Genome-fragment | NA | 2.78 |
| S7_k141_14129                                  | 4221  | No   | NA   | 0 | 1 | Not-determined | Genome-fragment | NA | 0    |
| S4-final-viral-combined_k141_143595  full      | 2027  | No   | NA   | 0 | 0 | Low-quality    | Genome-fragment | NA | 1.33 |
| S7_k141_177717                                 | 3468  | No   | NA   | 0 | 1 | Not-determined | Genome-fragment | NA | 0    |
| S7_k141_85508                                  | 1319  | No</ |      |   |   |                |                 |    |      |



|                                                 |       |     |       |    |    |                |                 |       |       |
|-------------------------------------------------|-------|-----|-------|----|----|----------------|-----------------|-------|-------|
| S12-final-viral-combined_k141_115637]] [full    | 2028  | No  | NA    | 2  | 0  | Low-quality    | Genome-fragment | 5.43  | 0     |
| S7_k141_146095                                  | 1619  | No  | NA    | 0  | 1  | Not-determined | Genome-fragment | NA    | 0     |
| S7_k141_177907                                  | 1119  | No  | NA    | 0  | 1  | Not-determined | Genome-fragment | NA    | 0     |
| S7_k141_45105                                   | 1145  | No  | NA    | 0  | 1  | Not-determined | Genome-fragment | NA    | 0     |
| S7_k141_35100                                   | 2104  | No  | NA    | 0  | 2  | Not-determined | Genome-fragment | NA    | 0     |
| S7_k141_177963                                  | 1001  | No  | NA    | 0  | 1  | Not-determined | Genome-fragment | NA    | 0     |
| S7_k141_116736                                  | 3106  | No  | NA    | 0  | 3  | Not-determined | Genome-fragment | NA    | 0     |
| S2-final-viral-combined_k141_199973]] [full     | 2028  | No  | NA    | 3  | 0  | Low-quality    | Genome-fragment | 4     | 0     |
| S7_k141_95675                                   | 1273  | No  | NA    | 0  | 1  | Not-determined | Genome-fragment | NA    | 0     |
| S7_k141_136720                                  | 1096  | No  | NA    | 0  | 1  | Not-determined | Genome-fragment | NA    | 0     |
| S7_k141_85717                                   | 3762  | No  | NA    | 0  | 1  | Not-determined | Genome-fragment | NA    | 0     |
| S7_k141_116757                                  | 2238  | No  | NA    | 0  | 2  | Not-determined | Genome-fragment | NA    | 0     |
| S8-final-viral-combined_k141_43039]] [full      | 2028  | No  | NA    | 1  | 0  | Low-quality    | Genome-fragment | 3.25  | 0     |
| S7_k141_239597                                  | 1485  | No  | NA    | 0  | 2  | Not-determined | Genome-fragment | NA    | 0     |
| S7_k141_217975                                  | 1910  | No  | NA    | 0  | 2  | Not-determined | Genome-fragment | NA    | 0     |
| S8-final-viral-combined_k141_104056]] [full     | 2029  | No  | NA    | 1  | 0  | Low-quality    | Genome-fragment | 3.26  | 0     |
| S11-final-viral-combined_k141_148488]] [full    | 2029  | No  | NA    | 1  | 0  | Low-quality    | Genome-fragment | 4.76  | 0     |
| S7_k141_239642                                  | 1434  | No  | NA    | 0  | 1  | Not-determined | Genome-fragment | NA    | 0     |
| S7-final-viral-combined_k141_123387]] [full     | 2029  | No  | NA    | 2  | 0  | Low-quality    | Genome-fragment | 6.29  | 0     |
| S2-final-viral-combined_k141_58074]] [full      | 2029  | No  | NA    | 0  | 1  | Low-quality    | Genome-fragment | 1.19  | 0     |
| S7_k141_95761                                   | 1217  | No  | NA    | 0  | 1  | Not-determined | Genome-fragment | NA    | 0     |
| S7_k141_295787                                  | 1014  | No  | NA    | 0  | 1  | Not-determined | Genome-fragment | NA    | 0     |
| S7_k141_23969                                   | 1528  | No  | NA    | 0  | 1  | Not-determined | Genome-fragment | NA    | 0     |
| S2_k141_155386                                  | 2029  | No  | NA    | 0  | 0  | Low-quality    | Genome-fragment | 3.52  | 0     |
| S7_k141_188597                                  | 8498  | No  | NA    | 0  | 6  | Not-determined | Genome-fragment | NA    | 0     |
| S7_k141_209360                                  | 2175  | No  | NA    | 0  | 0  | Not-determined | Genome-fragment | NA    | 0     |
| S7_k141_23985                                   | 3729  | No  | NA    | 0  | 0  | Not-determined | Genome-fragment | NA    | 0     |
| S2_k141_45167                                   | 2029  | No  | NA    | 0  | 2  | Low-quality    | Genome-fragment | 5.12  | 0     |
| S11-final-viral-combined_k141_224085]] [full    | 2030  | No  | NA    | 1  | 0  | Low-quality    | Genome-fragment | 4.03  | 0     |
| S7_k141_136850                                  | 1238  | No  | NA    | 0  | 2  | Not-determined | Genome-fragment | NA    | 0     |
| S7_k141_14322                                   | 1852  | No  | NA    | 0  | 2  | Not-determined | Genome-fragment | NA    | 0     |
| S7_k141_75155                                   | 1456  | No  | NA    | 1  | 1  | Not-determined | Genome-fragment | NA    | 0     |
| S7_k141_127210                                  | 3410  | No  | NA    | 0  | 1  | Not-determined | Genome-fragment | NA    | 0     |
| S7_k141_14385                                   | 1139  | No  | NA    | 0  | 0  | Not-determined | Genome-fragment | NA    | 0     |
| S11-final-viral-combined_k141_47300]] [full     | 2030  | No  | NA    | 2  | 0  | Low-quality    | Genome-fragment | 5.33  | 0     |
| S7_k141_95836                                   | 1383  | No  | NA    | 0  | 1  | Not-determined | Genome-fragment | NA    | 0     |
| S11-final-viral-combined_k141_219928]] [full    | 2030  | No  | NA    | 0  | 2  | Low-quality    | Genome-fragment | 1.28  | 0     |
| S12-final-viral-combined_k141_36463]] [full     | 2030  | No  | NA    | 1  | 0  | Low-quality    | Genome-fragment | 0.93  | 0     |
| S7_k141_157784                                  | 1206  | No  | NA    | 0  | 1  | Not-determined | Genome-fragment | NA    | 0     |
| S7_k141_199133                                  | 1016  | No  | NA    | 0  | 0  | Not-determined | Genome-fragment | NA    | 0     |
| S7_k141_199137                                  | 7570  | No  | NA    | 0  | 1  | Not-determined | Genome-fragment | NA    | 0     |
| S7_k141_144460                                  | 1885  | No  | NA    | 0  | 1  | Not-determined | Genome-fragment | NA    | 0     |
| S7_k141_199145                                  | 4829  | No  | NA    | 0  | 4  | Not-determined | Genome-fragment | NA    | 0     |
| S7_k141_85871                                   | 4503  | No  | NA    | 0  | 0  | Not-determined | Genome-fragment | NA    | 0     |
| S7_k141_218143                                  | 1484  | No  | NA    | 0  | 1  | Not-determined | Genome-fragment | NA    | 0     |
| S7_k141_116939                                  | 1004  | No  | NA    | 0  | 0  | Not-determined | Genome-fragment | NA    | 0     |
| S12-final-viral-combined_k141_130713]] [full    | 2030  | No  | NA    | 0  | 0  | Low-quality    | Genome-fragment | 4.64  | 0     |
| S12-final-viral-combined_k141_401094]] [full    | 2030  | No  | NA    | 1  | 0  | Low-quality    | Genome-fragment | 4.48  | 0     |
| S7_k141_178218                                  | 1211  | No  | NA    | 0  | 1  | Not-determined | Genome-fragment | NA    | 0     |
| S7_k141_239833                                  | 16632 | No  | NA    | 8  | 0  | Medium-quality | Genome-fragment | 75.22 | 0     |
| S7_k141_157861                                  | 1058  | No  | NA    | 0  | 1  | Not-determined | Genome-fragment | NA    | 0     |
| S7_k141_127259                                  | 1604  | No  | NA    | 0  | 1  | Not-determined | Genome-fragment | NA    | 0     |
| S7_k141_137008                                  | 1036  | No  | NA    | 0  | 0  | Not-determined | Genome-fragment | NA    | 0     |
| S7_k141_14526                                   | 1498  | No  | NA    | 0  | 1  | Not-determined | Genome-fragment | NA    | 0     |
| S7_k141_147046                                  | 8784  | No  | NA    | 0  | 9  | Not-determined | Genome-fragment | NA    | 0     |
| S7_k141_209584                                  | 4580  | No  | NA    | 0  | 1  | Not-determined | Genome-fragment | NA    | 0     |
| S7_k141_116966                                  | 6783  | No  | NA    | 0  | 2  | Not-determined | Genome-fragment | NA    | 0     |
| S7_k141_35477                                   | 1151  | No  | NA    | 0  | 0  | Not-determined | Genome-fragment | NA    | 0     |
| S7_k141_147072                                  | 1043  | No  | NA    | 0  | 1  | Not-determined | Genome-fragment | NA    | 0     |
| S7_k141_55353                                   | 1396  | No  | NA    | 0  | 3  | Not-determined | Genome-fragment | NA    | 0     |
| S7_k141_85988                                   | 3621  | No  | NA    | 0  | 2  | Not-determined | Genome-fragment | NA    | 0     |
| S12-final-viral-combined_k141_140017]] [Itzgene | 2030  | No  | NA    | 1  | 0  | Low-quality    | Genome-fragment | 1.32  | 0     |
| S12_k141_235857                                 | 2030  | No  | NA    | 1  | 0  | Low-quality    | Genome-fragment | 1.11  | 0     |
| S7_k141_55393                                   | 1191  | No  | NA    | 0  | 0  | Not-determined | Genome-fragment | NA    | 0     |
| S2-final-viral-combined_k141_191313]] [full     | 2030  | No  | NA    | 1  | 1  | Low-quality    | Genome-fragment | 2.57  | 0     |
| S7_k141_66025                                   | 3398  | No  | NA    | 0  | 2  | Not-determined | Genome-fragment | NA    | 0     |
| S7-final-viral-combined_k141_131983]] [full     | 2031  | No  | NA    | 1  | 0  | Low-quality    | Genome-fragment | 3.99  | 0     |
| S17-final-viral-combined_k141_215422]] [full    | 2031  | No  | NA    | 0  | 1  | Low-quality    | Genome-fragment | 1.92  | 0     |
| S7_k141_209673                                  | 1012  | No  | NA    | 0  | 1  | Not-determined | Genome-fragment | NA    | 0     |
| S7_k141_4473                                    | 1313  | No  | NA    | 0  | 1  | Not-determined | Genome-fragment | NA    | 0     |
| S7_k141_86028                                   | 3939  | No  | NA    | 0  | 3  | Not-determined | Genome-fragment | NA    | 0     |
| S7_k141_158050                                  | 1005  | No  | NA    | 0  | 0  | Not-determined | Genome-fragment | NA    | 0     |
| S7_k141_35586                                   | 1073  | No  | NA    | 0  | 0  | Not-determined | Genome-fragment | NA    | 0     |
| S7_k141_55487                                   | 1011  | No  | NA    | 0  | 0  | Not-determined | Genome-fragment | NA    | 0     |
| S7_k141_60095                                   | 3001  | No  | NA    | 0  | 0  | Not-determined | Genome-fragment | NA    | 0     |
| S12_k141_278491                                 | 2031  | No  | NA    | 0  | 2  | Low-quality    | Genome-fragment | 0.76  | 0     |
| S7_k141_127415                                  | 3316  | No  | NA    | 0  | 1  | Not-determined | Genome-fragment | NA    | 0     |
| S7_k141_96120                                   | 1541  | No  | NA    | 0  | 2  | Not-determined | Genome-fragment | NA    | 0     |
| S7_k141_4558                                    | 1046  | No  | NA    | 0  | 0  | Not-determined | Genome-fragment | NA    | 0     |
| S7_k141_35699                                   | 2098  | No  | NA    | 0  | 0  | Not-determined | Genome-fragment | NA    | 0     |
| S7_k141_4568                                    | 3132  | No  | NA    | 0  | 0  | Not-determined | Genome-fragment | NA    | 0     |
| S7_k141_199149                                  | 3610  | No  | NA    | 0  | 0  | Not-determined | Genome-fragment | NA    | 0     |
| S7_k141_168332                                  | 1066  | No  | NA    | 0  | 1  | Not-determined | Genome-fragment | NA    | 0     |
| S7_k141_55593                                   | 1008  | No  | NA    | 0  | 0  | Not-determined | Genome-fragment | NA    | 0     |
| S7_k141_240039                                  | 1066  | No  | NA    | 0  | 1  | Not-determined | Genome-fragment | NA    | 0     |
| S7_k141_218294                                  | 4181  | No  | NA    | 0  | 4  | Not-determined | Genome-fragment | NA    | 0     |
| S7_k141_35741                                   | 3062  | No  | NA    | 0  | 0  | Not-determined | Genome-fragment | NA    | 0     |
| S7_k141_106480                                  | 9961  | No  | NA    | 0  | 0  | Not-determined | Genome-fragment | NA    | 0     |
| S7_k141_158193                                  | 5462  | No  | NA    | 0  | 0  | Not-determined | Genome-fragment | NA    | 0     |
| S4-final-viral-combined_k141_159914]] [full     | 2031  | No  | NA    | 0  | 0  | Low-quality    | Genome-fragment | 3.14  | 0     |
| S7_k141_106522                                  | 1840  | No  | NA    | 0  | 1  | Not-determined | Genome-fragment | NA    | 0     |
| S7_k141_96155                                   | 1389  | No  | NA    | 0  | 0  | Not-determined | Genome-fragment | NA    | 0     |
| S8-final-viral-combined_k141_164834]] [full     | 2031  | Yes | 920   | 1  | 1  | Low-quality    | Genome-fragment | 0.35  | 54.7  |
| S7_k141_168444                                  | 3053  | No  | NA    | 0  | 0  | Not-determined | Genome-fragment | NA    | 0     |
| S7_k141_242126                                  | 1459  | No  | NA    | 0  | 1  | Not-determined | Genome-fragment | NA    | 0     |
| S7_k141_96290                                   | 1146  | No  | NA    | 0  | 2  | Not-determined | Genome-fragment | NA    | 0     |
| S7_k141_35852                                   | 3022  | No  | NA    | 0  | 2  | Not-determined | Genome-fragment | NA    | 0     |
| S11-final-viral-combined_k141_09557]] [Itzgene  | 2032  | No  | NA    | 0  | 0  | Low-quality    | Genome-fragment | 4.51  | 0     |
| S7_k141_168494                                  | 1249  | No  | NA    | 0  | 1  | Not-determined | Genome-fragment | NA    | 0     |
| S7_k141_189000                                  | 1919  | No  | NA    | 0  | 2  | Not-determined | Genome-fragment | NA    | 0     |
| S11_k141_109937                                 | 2032  | No  | NA    | 1  | 0  | Low-quality    | Genome-fragment | 3.44  | 0     |
| S7_k141_199436                                  | 3812  | No  | NA    | 0  | 2  | Not-determined | Genome-fragment | NA    | 0     |
| S7_k141_106593                                  | 1759  | No  | NA    | 0  | 4  | Not-determined | Genome-fragment | NA    | 0     |
| S7_k141_178759                                  | 2188  | No  | NA    | 0  | 2  | Not-determined | Genome-fragment | NA    | 0     |
| S7_k141_189070                                  | 3102  | No  | NA    | 0  | 3  | Not-determined | Genome-fragment | NA    | 0     |
| S7_k141_240154                                  | 1471  | No  | NA    | 0  | 1  | Not-determined | Genome-fragment | NA    | 0     |
| S1-final-viral-combined_k141_182643]] [full     | 2032  | No  | NA    | 0  | 0  | Low-quality    | Genome-fragment | 4.21  | 0     |
| S7_k141_137390                                  | 1314  | No  | NA    | 0  | 1  | Not-determined | Genome-fragment | NA    | 0     |
| S7_k141_158352                                  | 1477  | No  | NA    | 0  | 1  | Not-determined | Genome-fragment | NA    | 0     |
| S7_k141_86369                                   | 3556  | No  | NA    | 0  | 4  | Not-determined | Genome-fragment | NA    | 0     |
| S7_k141_14786                                   | 1081  | No  | NA    | 0  | 1  | Not-determined | Genome-fragment | NA    | 0     |
| S7_k141_86386                                   | 4703  | No  | NA    | 0  | 2  | Not-determined | Genome-fragment | NA    | 0     |
| S7_k141_75731                                   | 1273  | No  | NA    | 0  | 0  | Not-determined | Genome-fragment | NA    | 0     |
| S7-final-viral-combined_k141_128275]] [full     | 2032  | No  | NA    | 0  | 1  | Low-quality    | Genome-fragment | 1.19  | 0     |
| S7_k141_168646                                  | 2192  | No  | NA    | 0  | 1  | Not-determined | Genome-fragment | NA    | 0     |
| S7_k141_147415                                  | 5202  | No  | NA    | 0  | 3  | Not-determined | Genome-fragment | NA    | 0     |
| S17-final-viral-combined_k141_47244]] [full     | 2032  | No  | NA    | 3  | 0  | Low-quality    | Genome-fragment | 5.2   | 0     |
| S7_k141_147497                                  | 1590  | No  | NA    | 0  | 2  | Not-determined | Genome-fragment | NA    | 0     |
| S7_k141_209786                                  | 3543  | No  | NA    | 0  | 3  | Not-determined | Genome-fragment | NA    | 0     |
| S7_k141_229778                                  | 5975  | No  | NA    | 0  | 2  | Not-determined | Genome-fragment | NA    | 0     |
| S7_k141_147509                                  | 1419  | No  | NA    | 0  | 1  | Not-determined | Genome-fragment | NA    | 0     |
| S12-final-viral-combined_k141_366486]] [full    | 2032  | No  | NA    | 0  | 1  | Low-quality    | Genome-fragment | 2.21  | 0     |
| S8-final-viral-combined_k141_237720]] [full     | 2032  | No  | NA    | 1  | 0  | Low-quality    | Genome-fragment | 5.96  | 0     |
| S7_k141_199639                                  | 1701  | No  | NA    | 0  | 5  | Not-determined | Genome-fragment | NA    | 0     |
| S7_k141_242156                                  | 2158  | No  | NA    | 0  | 2  | Not-determined | Genome-fragment | NA    | 0     |
| S7_k141_35532                                   | 19398 | No  | NA    | 0  | 12 | Not-determined | Genome-fragment | NA    | 0     |
| S7_k141_56016                                   | 1049  | No  | NA    | 0  | 0  | Not-determined | Genome-fragment | NA    | 0     |
| S7_k141_117588                                  | 1211  | No  | NA    | 0  | 0  | Not-determined | Genome-fragment | NA    | 0     |
| S11_k141_298394                                 | 2033  | No  | NA    | 0  | 0  | Low-quality    | Genome-fragment | 4.6   | 0     |
| S7_k141_75849                                   | 1552  | No  | NA    | 0  | 2  | Not-determined | Genome-fragment | NA    | 0     |
| S7_k141_14988                                   | 1770  | No  | NA    | 0  | 1  | Not-determined | Genome-fragment | NA    | 0     |
| S7_k141_178852                                  | 1612  | No  | NA    | 0  | 0  | Not-determined | Genome-fragment | NA    | 0     |
| S7_k141_56047                                   | 1971  | No  | NA    | 0  | 1  | Not-determined | Genome-fragment | NA    | 0     |
| S7_k141_147599                                  | 1101  | No  | NA    | 0  | 3  | Not-determined | Genome-fragment | NA    | 0     |
| S7_k141_229878                                  | 1393  | No  | NA    | 0  | 2  | Not-determined | Genome-fragment | NA    | 0     |
| S7_k141_117638                                  | 1483  | No  | NA    | 0  | 0  | Not-determined | Genome-fragment | NA    | 0     |
| S7_k141_189177                                  | 1085  | No  | NA    | 0  | 0  | Not-determined | Genome-fragment | NA    | 0     |
| S7_k141_24389                                   | 1617  | No  | NA    | 0  | 2  | Not-determined | Genome-fragment | NA    | 0     |
| S7_k141_218461                                  | 1444  | No  | NA    | 0  | 1  | Not-determined | Genome-fragment | NA    | 0     |
| S7_k141_127801                                  | 68405 | Yes | 38455 | 18 | 8  | High-quality   | High-quality    | 99.6  | 43.78 |
| S7_k141_229925                                  | 1095  | No  | NA    | 0  | 1  | Not-determined | Genome-fragment | NA    | 0     |
| S7_k141_229948                                  | 1176  | No  | NA    | 0  | 0  | Not-determined | Genome-fragment | NA    | 0     |
| S7_k141_4945                                    | 5672  | No  | NA    | 0  | 4  | Not-determined | Genome-fragment | NA    | 0     |
| S7_k141_158534                                  | 3224  | No  | NA    | 0  | 2  | Not-determined | Genome-fragment | NA    | 0     |
| S7_k141_60812                                   | 22315 | No  | NA    | 0  | 5  | Not-determined | Genome-fragment | NA    | 0     |
| S5-final-viral-combined_k141_189590]] [full     | 2033  | No  | NA    |    |    |                |                 |       |       |



|                                              |       |     |    |    |   |                |                 |       |       |
|----------------------------------------------|-------|-----|----|----|---|----------------|-----------------|-------|-------|
| S7_k141_200046                               | 3386  | No  | NA | 0  | 9 | Not-determined | Genome-fragment | NA    | 0     |
| S7_k141_118229                               | 3597  | No  | NA | 0  | 2 | Not-determined | Genome-fragment | NA    | 0     |
| S7_k141_189495                               | 3903  | No  | NA | 0  | 3 | Not-determined | Genome-fragment | NA    | 0     |
| S7_k141_24742                                | 4162  | No  | NA | 0  | 0 | Not-determined | Genome-fragment | NA    | 0     |
| S7_k141_118058                               | 3285  | No  | NA | 0  | 1 | Not-determined | Genome-fragment | NA    | 0     |
| S7_k141_107055                               | 1251  | No  | NA | 0  | 1 | Not-determined | Genome-fragment | NA    | 0     |
| S7_k141_107060                               | 2334  | No  | NA | 0  | 1 | Not-determined | Genome-fragment | NA    | 0     |
| S7_k141_76235                                | 10432 | No  | NA | 0  | 4 | Not-determined | Genome-fragment | NA    | 0     |
| S7_k141_59933                                | 1484  | No  | NA | 0  | 0 | Not-determined | Genome-fragment | NA    | 0     |
| S7_k141_118074                               | 3881  | No  | NA | 0  | 4 | Not-determined | Genome-fragment | NA    | 0     |
| S6_k141_33023                                | 2034  | No  | NA | 0  | 1 | Low-quality    | Genome-fragment | 5.74  | 0     |
| S9-final-viral-combined_k141_17436][full     | 2035  | No  | NA | 0  | 1 | Low-quality    | Genome-fragment | 4.36  | 0     |
| S7_k141_175199                               | 3603  | No  | NA | 0  | 3 | Not-determined | Genome-fragment | NA    | 0     |
| S1-final-viral-combined_k141_353831][H2gene  | 2035  | No  | NA | 1  | 0 | Low-quality    | Genome-fragment | 3.69  | 0     |
| S7_k141_36183                                | 1043  | No  | NA | 0  | 2 | Not-determined | Genome-fragment | NA    | 0     |
| S7_k141_67074                                | 4769  | No  | NA | 0  | 1 | Not-determined | Genome-fragment | NA    | 0     |
| S7_k141_200173                               | 2133  | No  | NA | 0  | 1 | Not-determined | Genome-fragment | NA    | 0     |
| S1_k141_265939                               | 2035  | No  | NA | 0  | 0 | Low-quality    | Genome-fragment | 2.4   | 0     |
| S7_k141_169153                               | 1769  | No  | NA | 0  | 1 | Not-determined | Genome-fragment | NA    | 0     |
| S7_k141_5268                                 | 3111  | No  | NA | 0  | 0 | Not-determined | Genome-fragment | NA    | 0     |
| S7-final-viral-combined_k141_26575][full     | 2035  | No  | NA | 0  | 1 | Low-quality    | Genome-fragment | 4.1   | 0     |
| S7-final-viral-combined_k141_62901][H2gene   | 2035  | Yes | NA | 1  | 1 | Low-quality    | Genome-fragment | 1.15  | 69.09 |
| S7_k141_200190                               | 1067  | No  | NA | 0  | 1 | Not-determined | Genome-fragment | NA    | 0     |
| S7_k141_97015                                | 2022  | No  | NA | 0  | 1 | Not-determined | Genome-fragment | NA    | 0     |
| S7_k141_230142                               | 2317  | No  | NA | 0  | 0 | Not-determined | Genome-fragment | NA    | 0     |
| S7_k141_158786                               | 1009  | No  | NA | 0  | 1 | Not-determined | Genome-fragment | NA    | 0     |
| S7_k141_76318                                | 3167  | No  | NA | 0  | 0 | Not-determined | Genome-fragment | NA    | 0     |
| S7_k141_24809                                | 1427  | No  | NA | 0  | 1 | Not-determined | Genome-fragment | NA    | 0     |
| S7_k141_169244                               | 1345  | No  | NA | 0  | 1 | Not-determined | Genome-fragment | NA    | 0     |
| S7_k141_189614                               | 1146  | No  | NA | 0  | 0 | Not-determined | Genome-fragment | NA    | 0     |
| S12-final-viral-combined_k141_73972][full    | 2035  | No  | NA | 0  | 0 | Low-quality    | Genome-fragment | 32.36 | 0     |
| S7_k141_5348                                 | 14272 | No  | NA | 0  | 2 | Not-determined | Genome-fragment | NA    | 0     |
| S7_k141_230213                               | 3437  | No  | NA | 0  | 2 | Not-determined | Genome-fragment | NA    | 0     |
| S7_k141_36307                                | 1367  | No  | NA | 0  | 1 | Not-determined | Genome-fragment | NA    | 0     |
| S7_k141_97072                                | 1401  | No  | NA | 0  | 1 | Not-determined | Genome-fragment | NA    | 0     |
| S2-final-viral-combined_k141_134912][full    | 2035  | No  | NA | 0  | 0 | Low-quality    | Genome-fragment | 4.18  | 0     |
| S7_k141_169309                               | 1740  | No  | NA | 0  | 1 | Not-determined | Genome-fragment | NA    | 0     |
| S7_k141_67174                                | 1430  | No  | NA | 0  | 0 | Not-determined | Genome-fragment | NA    | 0     |
| S7_k141_36339                                | 1095  | No  | NA | 0  | 0 | Not-determined | Genome-fragment | NA    | 0     |
| S1-final-viral-combined_k141_215928][full    | 2036  | No  | NA | 1  | 0 | Low-quality    | Genome-fragment | 2.73  | 0     |
| S7_k141_137375                               | 5796  | No  | NA | 0  | 2 | Not-determined | Genome-fragment | NA    | 0     |
| S7_k141_107125                               | 2495  | No  | NA | 0  | 4 | Not-determined | Genome-fragment | NA    | 0     |
| S7_k141_218803                               | 2443  | No  | NA | 0  | 1 | Not-determined | Genome-fragment | NA    | 0     |
| S7_k141_189685                               | 5989  | No  | NA | 0  | 4 | Not-determined | Genome-fragment | NA    | 0     |
| S7_k141_56442                                | 1217  | No  | NA | 0  | 0 | Not-determined | Genome-fragment | NA    | 0     |
| S7_k141_97170                                | 6174  | No  | NA | 0  | 4 | Not-determined | Genome-fragment | NA    | 0     |
| S7_k141_189715                               | 4108  | No  | NA | 0  | 2 | Not-determined | Genome-fragment | NA    | 0     |
| S7_k141_240647                               | 1337  | No  | NA | 0  | 1 | Not-determined | Genome-fragment | NA    | 0     |
| S7_k141_76437                                | 8180  | No  | NA | 2  | 0 | High-quality   | High-quality    | 95.59 | 0     |
| S7_k141_200340                               | 1104  | No  | NA | 0  | 1 | Not-determined | Genome-fragment | NA    | 0     |
| S1-final-viral-combined_k141_123536][full    | 2036  | No  | NA | 0  | 0 | Low-quality    | Genome-fragment | 2.65  | 0     |
| S2-final-viral-combined_k141_67241][H2gene   | 2036  | No  | NA | 1  | 0 | Low-quality    | Genome-fragment | 5.27  | 0     |
| S7_k141_36462                                | 7085  | No  | NA | 0  | 4 | Not-determined | Genome-fragment | NA    | 0     |
| S7_k141_118281                               | 1414  | No  | NA | 0  | 1 | Not-determined | Genome-fragment | NA    | 0     |
| S5_k141_48625                                | 2036  | No  | NA | 0  | 1 | Low-quality    | Genome-fragment | 2.25  | 0     |
| S7_k141_76475                                | 1444  | No  | NA | 0  | 0 | Not-determined | Genome-fragment | NA    | 0     |
| S7_k141_210338                               | 2241  | No  | NA | 0  | 2 | Not-determined | Genome-fragment | NA    | 0     |
| S7_k141_107785                               | 1405  | No  | NA | 0  | 2 | Not-determined | Genome-fragment | NA    | 0     |
| S12-final-viral-combined_k141_90561][full    | 2036  | No  | NA | 1  | 0 | Low-quality    | Genome-fragment | 4.81  | 0     |
| S7_k141_200446                               | 5588  | No  | NA | 0  | 4 | Not-determined | Genome-fragment | NA    | 0     |
| S2-final-viral-combined_k141_113952][full    | 2036  | No  | NA | 3  | 0 | Low-quality    | Genome-fragment | 5.52  | 0     |
| S7_k141_56564                                | 3617  | No  | NA | 0  | 0 | Not-determined | Genome-fragment | NA    | 0     |
| S7_k141_36522                                | 1097  | No  | NA | 0  | 1 | Not-determined | Genome-fragment | NA    | 0     |
| S7_k141_15708                                | 1299  | No  | NA | 0  | 0 | Not-determined | Genome-fragment | NA    | 0     |
| S7_k141_76546                                | 1153  | No  | NA | 0  | 0 | Not-determined | Genome-fragment | NA    | 0     |
| S7_k141_189874                               | 5597  | No  | NA | 0  | 0 | Not-determined | Genome-fragment | NA    | 0     |
| S7_k141_86863                                | 1030  | No  | NA | 0  | 0 | Not-determined | Genome-fragment | NA    | 0     |
| S2_k141_4361                                 | 2036  | No  | NA | 1  | 0 | Low-quality    | Genome-fragment | 2.01  | 0     |
| S7_k141_56613                                | 2036  | No  | NA | 0  | 0 | Not-determined | Genome-fragment | NA    | 0     |
| S7_k141_46507                                | 1572  | No  | NA | 0  | 0 | Not-determined | Genome-fragment | NA    | 0     |
| S6-final-viral-combined_k141_29031][full     | 2036  | No  | NA | 0  | 1 | Low-quality    | Genome-fragment | 0.98  | 0     |
| S7_k141_240801                               | 3317  | No  | NA | 0  | 0 | Not-determined | Genome-fragment | NA    | 0     |
| S7_k141_169447                               | 1574  | No  | NA | 0  | 1 | Not-determined | Genome-fragment | NA    | 0     |
| S9-final-viral-combined_k141_107388][full    | 2037  | No  | NA | 0  | 0 | Low-quality    | Genome-fragment | 3.78  | 0     |
| S11-final-viral-combined_k141_146191][full   | 2037  | No  | NA | 0  | 0 | Low-quality    | Genome-fragment | 5.64  | 0     |
| S7_k141_36681                                | 1042  | No  | NA | 0  | 0 | Not-determined | Genome-fragment | NA    | 0     |
| S7_k141_189943                               | 4599  | No  | NA | 0  | 0 | Not-determined | Genome-fragment | NA    | 0     |
| S7_k141_118369                               | 4987  | No  | NA | 0  | 1 | Not-determined | Genome-fragment | NA    | 0     |
| S2-final-viral-combined_k141_4531][full      | 2037  | No  | NA | 0  | 1 | Low-quality    | Genome-fragment | 2.57  | 0     |
| S7_k141_46561                                | 1159  | No  | NA | 0  | 1 | Not-determined | Genome-fragment | NA    | 0     |
| S7_k141_159112                               | 3490  | No  | NA | 0  | 1 | Not-determined | Genome-fragment | NA    | 0     |
| S7_k141_107490                               | 1381  | No  | NA | 0  | 0 | Not-determined | Genome-fragment | NA    | 0     |
| S7_k141_159142                               | 3574  | No  | NA | 0  | 2 | Not-determined | Genome-fragment | NA    | 0     |
| S8-final-viral-combined_k141_178912][full    | 2037  | No  | NA | 0  | 2 | Low-quality    | Genome-fragment | 1.01  | 0     |
| S7_k141_86962                                | 1048  | No  | NA | 0  | 0 | Not-determined | Genome-fragment | NA    | 0     |
| S7_k141_169522                               | 1216  | No  | NA | 0  | 1 | Not-determined | Genome-fragment | NA    | 0     |
| S8-final-viral-combined_k141_76790][full     | 2037  | No  | NA | 2  | 0 | Low-quality    | Genome-fragment | 6.54  | 0     |
| S7_k141_179596                               | 3339  | No  | NA | 0  | 0 | Not-determined | Genome-fragment | NA    | 0     |
| S7_k141_210605                               | 1151  | No  | NA | 0  | 2 | Not-determined | Genome-fragment | NA    | 0     |
| S7_k141_118429                               | 9623  | No  | NA | 0  | 2 | Not-determined | Genome-fragment | NA    | 0     |
| S8-final-viral-combined_k141_299843][H2gene  | 2037  | No  | NA | 0  | 0 | Low-quality    | Genome-fragment | 4.27  | 0     |
| S7_k141_190089                               | 3458  | No  | NA | 0  | 0 | Not-determined | Genome-fragment | NA    | 0     |
| S11-final-viral-combined_k141_322986][full   | 2038  | No  | NA | 1  | 0 | Low-quality    | Genome-fragment | 4.32  | 0     |
| S7_k141_138343                               | 1011  | No  | NA | 0  | 1 | Not-determined | Genome-fragment | NA    | 0     |
| S7_k141_148321                               | 1058  | No  | NA | 0  | 1 | Not-determined | Genome-fragment | NA    | 0     |
| S1-final-viral-combined_k141_232513][full    | 2038  | No  | NA | 2  | 0 | Low-quality    | Genome-fragment | 3.79  | 0     |
| S7_k141_230532                               | 5582  | No  | NA | 0  | 1 | Not-determined | Genome-fragment | NA    | 0     |
| S7_k141_159250                               | 4027  | No  | NA | 0  | 0 | Not-determined | Genome-fragment | NA    | 0     |
| S7_k141_97473                                | 1569  | No  | NA | 0  | 0 | Not-determined | Genome-fragment | NA    | 0     |
| S7_k141_148356                               | 1078  | No  | NA | 0  | 1 | Not-determined | Genome-fragment | NA    | 0     |
| S7_k141_97478                                | 2494  | No  | NA | 0  | 1 | Not-determined | Genome-fragment | NA    | 0     |
| S12-final-viral-combined_k141_529901][full   | 2038  | No  | NA | 0  | 1 | Low-quality    | Genome-fragment | 2.62  | 0     |
| S7_k141_215009                               | 3992  | No  | NA | 0  | 2 | Not-determined | Genome-fragment | NA    | 0     |
| S7_k141_190177                               | 1595  | No  | NA | 0  | 0 | Not-determined | Genome-fragment | NA    | 0     |
| S7_k141_138419                               | 1310  | No  | NA | 0  | 0 | Not-determined | Genome-fragment | NA    | 0     |
| S7_k141_15904                                | 3758  | No  | NA | 0  | 0 | Not-determined | Genome-fragment | NA    | 0     |
| S11-final-viral-combined_k141_245670][H2gene | 2039  | No  | NA | 2  | 0 | Low-quality    | Genome-fragment | 4.67  | 0     |
| S7_k141_87126                                | 1136  | No  | NA | 0  | 1 | Not-determined | Genome-fragment | NA    | 0     |
| S7_k141_36860                                | 1913  | No  | NA | 0  | 0 | Not-determined | Genome-fragment | NA    | 0     |
| S7_k141_15916                                | 1643  | No  | NA | 0  | 2 | Not-determined | Genome-fragment | NA    | 0     |
| S7_k141_138444                               | 1352  | No  | NA | 0  | 0 | Not-determined | Genome-fragment | NA    | 0     |
| S7_k141_97519                                | 5011  | No  | NA | 0  | 2 | Not-determined | Genome-fragment | NA    | 0     |
| S7_k141_46797                                | 1019  | No  | NA | 0  | 1 | Not-determined | Genome-fragment | NA    | 0     |
| S7_k141_179791                               | 1805  | No  | NA | 0  | 0 | Not-determined | Genome-fragment | NA    | 0     |
| S7_k141_67475                                | 1638  | No  | NA | 0  | 2 | Not-determined | Genome-fragment | NA    | 0     |
| S7_k141_219046                               | 3616  | No  | NA | 0  | 1 | Not-determined | Genome-fragment | NA    | 0     |
| S7_k141_15946                                | 4388  | No  | NA | 0  | 2 | Not-determined | Genome-fragment | NA    | 0     |
| S7_k141_148440                               | 9294  | No  | NA | 0  | 1 | Low-quality    | Genome-fragment | 0.73  | 0     |
| S1-final-viral-combined_k141_371355][full    | 2039  | No  | NA | 0  | 0 | Low-quality    | Genome-fragment | 100   | 0     |
| S7_k141_118607                               | 48532 | No  | NA | 21 | 0 | High-quality   | High-quality    | 100   | 0     |
| S7_k141_15976                                | 1169  | No  | NA | 0  | 0 | Not-determined | Genome-fragment | NA    | 0     |
| S7_k141_118622                               | 7258  | No  | NA | 0  | 2 | Not-determined | Genome-fragment | NA    | 0     |
| S7_k141_128659                               | 1019  | No  | NA | 0  | 0 | Not-determined | Genome-fragment | NA    | 0     |
| S7_k141_148493                               | 1307  | No  | NA | 0  | 0 | Not-determined | Genome-fragment | NA    | 0     |
| S7_k141_148505                               | 3653  | No  | NA | 0  | 1 | Not-determined | Genome-fragment | NA    | 0     |
| S7_k141_37026                                | 1150  | No  | NA | 0  | 1 | Not-determined | Genome-fragment | NA    | 0     |
| S7_k141_41848                                | 2039  | No  | NA | 0  | 0 | Low-quality    | Genome-fragment | 3.92  | 0     |
| S7_k141_230628                               | 1884  | No  | NA | 0  | 2 | Not-determined | Genome-fragment | NA    | 0     |
| S7_k141_190270                               | 1140  | No  | NA | 0  | 1 | Not-determined | Genome-fragment | NA    | 0     |
| S7_k141_159432                               | 33004 | No  | NA | 14 | 0 | Medium-quality | Genome-fragment | 67.48 | 0     |
| S7_k141_230636                               | 2902  | No  | NA | 0  | 1 | Not-determined | Genome-fragment | NA    | 0     |
| S7_k141_118644                               | 2129  | No  | NA | 0  | 0 | Not-determined | Genome-fragment | NA    | 0     |
| S7_k141_200751                               | 2106  | No  | NA | 0  | 0 | Not-determined | Genome-fragment | NA    | 0     |
| S7_k141_210799                               | 1036  | No  | NA | 0  | 1 | Not-determined | Genome-fragment | NA    | 0     |
| S12-final-viral-combined_k141_396648][full   | 2039  | No  | NA | 0  | 2 | Low-quality    | Genome-fragment | 3.35  | 0     |
| S4_k141_145180                               | 2039  | No  | NA | 1  | 0 | Low-quality    | Genome-fragment | 2.05  | 0     |
| S7_k141_16041                                | 11402 | No  | NA | 0  | 2 | Not-determined | Genome-fragment | NA    | 0     |
| S7_k141_87347                                | 4167  | No  | NA | 0  | 0 | Not-determined | Genome-fragment | NA    | 0     |
| S7_k141_118674                               | 1621  | No  | NA | 0  | 1 | Not-determined | Genome-fragment | NA    | 0     |
| S7_k141_56979                                | 3288  | No  | NA | 0  | 1 | Not-determined | Genome-fragment | NA    | 0     |
| S7_k141_118680                               | 1101  | No  | NA | 0  | 1 | Not-determined | Genome-fragment | NA    | 0     |
| S11-final-viral-combined_k141_217307][full   | 2040  | No  | NA | 0  | 0 | Low-quality    | Genome-fragment | 4.78  | 0     |
| S7_k141_241266                               | 2165  | No  | NA | 0  | 1 | Not-determined | Genome-fragment | NA    | 0     |
| S7_k141_5820                                 | 1655  | No  | NA | 0  | 1 | Not-determined | Genome-fragment | NA    | 0     |
| S7_k141_169994                               | 1550  | No  | NA | 0  | 1 | Not-determined | Genome-fragment | NA    | 0     |
| S7_k141_118728                               | 1774  | No  | NA | 0  | 1 | Not-determined | Genome-fragment | NA    | 0     |
| S7                                           |       |     |    |    |   |                |                 |       |       |



|                                             |       |     |    |      |   |                |                 |    |       |
|---------------------------------------------|-------|-----|----|------|---|----------------|-----------------|----|-------|
| S7_k141_138793                              | 4512  | No  | NA | 0    | 1 | Not-determined | Genome-fragment | NA | 0     |
| S7_k141_241357                              | 1119  | No  | NA | 0    | 0 | Not-determined | Genome-fragment | NA | 0     |
| S17-final-viral-combined_k141_577121[full]  | 2041  | No  | NA | 0    | 0 | Low-quality    | Genome-fragment | NA | 2.33  |
| S7_k141_87512                               | 1825  | No  | NA | 0    | 1 | Not-determined | Genome-fragment | NA | 0     |
| S7_k141_241367                              | 4172  | No  | NA | 0    | 1 | Not-determined | Genome-fragment | NA | 0     |
| S7_k141_170163                              | 3509  | No  | NA | 0    | 3 | Not-determined | Genome-fragment | NA | 0     |
| S17-final-viral-combined_k141_1306661[full] | 2041  | No  | NA | 0    | 0 | Low-quality    | Genome-fragment | NA | 2.92  |
| S4-final-viral-combined_k141_543541[full]   | 2041  | No  | NA | 0    | 0 | Low-quality    | Genome-fragment | NA | 3.09  |
| S9-final-viral-combined_k141_790591[full]   | 2042  | No  | NA | 0    | 1 | Low-quality    | Genome-fragment | NA | 0.54  |
| S7_k141_87530                               | 1639  | No  | NA | 0    | 1 | Not-determined | Genome-fragment | NA | 0     |
| S7_k141_128982                              | 1983  | No  | NA | 0    | 1 | Not-determined | Genome-fragment | NA | 0     |
| S7_k141_230926                              | 1363  | No  | NA | 0    | 0 | Not-determined | Genome-fragment | NA | 0     |
| S11-final-viral-combined_k141_1196231[full] | 2042  | No  | NA | 0    | 1 | Low-quality    | Genome-fragment | NA | 1.33  |
| S7_k141_190630                              | 1639  | No  | NA | 0    | 2 | Not-determined | Genome-fragment | NA | 0     |
| S7_k141_67971                               | 1107  | No  | NA | 0    | 1 | Not-determined | Genome-fragment | NA | 0     |
| S7_k141_67982                               | 3111  | No  | NA | 0    | 2 | Not-determined | Genome-fragment | NA | 0     |
| S7_k141_67985                               | 1232  | No  | NA | 0    | 2 | Not-determined | Genome-fragment | NA | 0     |
| S1-final-viral-combined_k141_3509831[full]  | 2042  | No  | NA | 0    | 1 | Low-quality    | Genome-fragment | NA | 2.19  |
| S7_k141_97967                               | 2042  | No  | NA | 0    | 2 | Not-determined | Genome-fragment | NA | 0     |
| S7_k141_6040                                | 1429  | No  | NA | 0    | 2 | Not-determined | Genome-fragment | NA | 0     |
| S7_k141_87593                               | 1514  | No  | NA | 0    | 2 | Not-determined | Genome-fragment | NA | 0     |
| S7_k141_77150                               | 1856  | No  | NA | 0    | 1 | Not-determined | Genome-fragment | NA | 0     |
| S7_k141_115042                              | 1089  | No  | NA | 0    | 0 | Not-determined | Genome-fragment | NA | 0     |
| S7_k141_211145                              | 3801  | No  | NA | 0    | 1 | Not-determined | Genome-fragment | NA | 0     |
| S17-final-viral-combined_k141_380971[full]  | 2042  | No  | NA | 2    | 0 | Low-quality    | Genome-fragment | NA | 5.27  |
| S12-final-viral-combined_k141_1570411[full] | 2042  | No  | NA | 2    | 0 | Low-quality    | Genome-fragment | NA | 6.05  |
| S7_k141_200936                              | 31792 | No  | NA | 13   | 2 | Medium-quality | Genome-fragment | NA | 88.82 |
| S7_k141_16484                               | 1294  | No  | NA | 0    | 0 | Not-determined | Genome-fragment | NA | 0     |
| S7_k141_138959                              | 1829  | No  | NA | 0    | 1 | Not-determined | Genome-fragment | NA | 0     |
| S7_k141_98050                               | 1078  | No  | NA | 0    | 1 | Not-determined | Genome-fragment | NA | 0     |
| S4-final-viral-combined_k141_1644211[full]  | 2042  | Yes | NA | 1502 | 1 | Low-quality    | Genome-fragment | NA | 3.27  |
| S7_k141_72133                               | 6282  | No  | NA | 0    | 2 | Not-determined | Genome-fragment | NA | 26.44 |
| S7_k141_231033                              | 1313  | No  | NA | 0    | 0 | Not-determined | Genome-fragment | NA | 0     |
| S7_k141_190775                              | 1118  | No  | NA | 0    | 0 | Not-determined | Genome-fragment | NA | 0     |
| S7_k141_57482                               | 3786  | No  | NA | 0    | 1 | Not-determined | Genome-fragment | NA | 0     |
| S7_k141_201096                              | 1025  | No  | NA | 0    | 0 | Not-determined | Genome-fragment | NA | 0     |
| S7_k141_201109                              | 1099  | No  | NA | 0    | 0 | Not-determined | Genome-fragment | NA | 0     |
| S7_k141_219549                              | 1390  | No  | NA | 0    | 1 | Not-determined | Genome-fragment | NA | 0     |
| S7_k141_77351                               | 6483  | No  | NA | 0    | 1 | Not-determined | Genome-fragment | NA | 0     |
| S7_k141_155829                              | 4369  | No  | NA | 0    | 3 | Not-determined | Genome-fragment | NA | 0     |
| S7_k141_149047                              | 3037  | No  | NA | 0    | 1 | Not-determined | Genome-fragment | NA | 0     |
| S7_k141_57545                               | 1384  | No  | NA | 0    | 1 | Not-determined | Genome-fragment | NA | 0     |
| S7_k141_139179                              | 1441  | No  | NA | 0    | 1 | Not-determined | Genome-fragment | NA | 0     |
| S7_k141_98222                               | 2515  | No  | NA | 0    | 1 | Not-determined | Genome-fragment | NA | 0     |
| S11-final-viral-combined_k141_712791[full]  | 2043  | No  | NA | 0    | 1 | Low-quality    | Genome-fragment | NA | 2.92  |
| S7_k141_57611                               | 2260  | No  | NA | 0    | 0 | Not-determined | Genome-fragment | NA | 0     |
| S7_k141_139216                              | 1074  | No  | NA | 0    | 2 | Not-determined | Genome-fragment | NA | 0     |
| S7_k141_37546                               | 1276  | No  | NA | 0    | 0 | Not-determined | Genome-fragment | NA | 0     |
| S7_k141_98067                               | 2622  | No  | NA | 0    | 3 | Not-determined | Genome-fragment | NA | 0     |
| S3_k141_75284                               | 2043  | No  | NA | 0    | 0 | Low-quality    | Genome-fragment | NA | 1.07  |
| S7_k141_37570                               | 1152  | No  | NA | 0    | 0 | Not-determined | Genome-fragment | NA | 0     |
| S7_k141_125177                              | 1128  | No  | NA | 0    | 1 | Not-determined | Genome-fragment | NA | 0     |
| S7_k141_6348                                | 1602  | No  | NA | 0    | 2 | Not-determined | Genome-fragment | NA | 0     |
| S5-final-viral-combined_k141_797311[full]   | 2043  | No  | NA | 2    | 0 | Low-quality    | Genome-fragment | NA | 3.28  |
| S4_k141_62656                               | 2043  | No  | NA | 0    | 0 | Low-quality    | Genome-fragment | NA | 2.2   |
| S7_k141_16687                               | 1095  | No  | NA | 0    | 0 | Not-determined | Genome-fragment | NA | 0     |
| S7_k141_149130                              | 1152  | No  | NA | 0    | 1 | Not-determined | Genome-fragment | NA | 0     |
| S7_k141_6385                                | 3403  | No  | NA | 0    | 1 | Not-determined | Genome-fragment | NA | 0     |
| S7_k141_170455                              | 1378  | No  | NA | 0    | 2 | Not-determined | Genome-fragment | NA | 0     |
| S7_k141_201365                              | 3620  | No  | NA | 0    | 3 | Not-determined | Genome-fragment | NA | 0     |
| S7_k141_170539                              | 1294  | No  | NA | 0    | 0 | Not-determined | Genome-fragment | NA | 0     |
| S7_k141_190991                              | 1123  | No  | NA | 0    | 1 | Not-determined | Genome-fragment | NA | 0     |
| S6-final-viral-combined_k141_757401[full]   | 2043  | No  | NA | 2    | 0 | Low-quality    | Genome-fragment | NA | 5.03  |
| S3_k141_86184                               | 2044  | No  | NA | 0    | 1 | Low-quality    | Genome-fragment | NA | 2.16  |
| S7_k141_100056                              | 1020  | No  | NA | 0    | 1 | Not-determined | Genome-fragment | NA | 0     |
| S5-final-viral-combined_k141_2101861[full]  | 2044  | No  | NA | 0    | 2 | Low-quality    | Genome-fragment | NA | 0.8   |
| S7_k141_180355                              | 1351  | No  | NA | 0    | 0 | Not-determined | Genome-fragment | NA | 0     |
| S7_k141_211315                              | 1407  | No  | NA | 0    | 1 | Not-determined | Genome-fragment | NA | 0     |
| S7_k141_191084                              | 5799  | No  | NA | 0    | 4 | Not-determined | Genome-fragment | NA | 0     |
| S7_k141_87939                               | 4764  | No  | NA | 0    | 5 | Not-determined | Genome-fragment | NA | 0     |
| S7_k141_68491                               | 2916  | No  | NA | 0    | 1 | Not-determined | Genome-fragment | NA | 0     |
| S7_k141_234428                              | 2044  | No  | NA | 0    | 1 | Low-quality    | Genome-fragment | NA | 3.75  |
| S7_k141_26161                               | 1705  | No  | NA | 0    | 1 | Not-determined | Genome-fragment | NA | 0     |
| S7_k141_16747                               | 4343  | No  | NA | 0    | 2 | Not-determined | Genome-fragment | NA | 0     |
| S7_k141_6526                                | 5474  | No  | NA | 0    | 2 | Not-determined | Genome-fragment | NA | 0     |
| S7_k141_191121                              | 1303  | No  | NA | 0    | 1 | Not-determined | Genome-fragment | NA | 0     |
| S7_k141_47563                               | 1001  | No  | NA | 0    | 1 | Not-determined | Genome-fragment | NA | 0     |
| S7_k141_68567                               | 4052  | No  | NA | 0    | 2 | Not-determined | Genome-fragment | NA | 0     |
| S7_k141_98485                               | 1327  | No  | NA | 0    | 0 | Not-determined | Genome-fragment | NA | 0     |
| S7_k141_129403                              | 7370  | No  | NA | 0    | 3 | Not-determined | Genome-fragment | NA | 0     |
| S7_k141_241759                              | 1042  | No  | NA | 0    | 0 | Not-determined | Genome-fragment | NA | 0     |
| S12-final-viral-combined_k141_2094661[full] | 2044  | No  | NA | 0    | 2 | Low-quality    | Genome-fragment | NA | 2.41  |
| S7_k141_149200                              | 1178  | No  | NA | 0    | 1 | Not-determined | Genome-fragment | NA | 0     |
| S12_k141_170286                             | 2044  | No  | NA | 0    | 0 | Low-quality    | Genome-fragment | NA | 4.25  |
| S7_k141_77612                               | 1316  | No  | NA | 0    | 1 | Not-determined | Genome-fragment | NA | 0     |
| S7_k141_191190                              | 2596  | No  | NA | 0    | 1 | Not-determined | Genome-fragment | NA | 0     |
| S7_k141_129448                              | 1262  | No  | NA | 0    | 0 | Not-determined | Genome-fragment | NA | 0     |
| S12_k141_49083                              | 2044  | No  | NA | 1    | 0 | Low-quality    | Genome-fragment | NA | 5.17  |
| S2-final-viral-combined_k141_1449451[full]  | 2044  | No  | NA | 1    | 0 | Low-quality    | Genome-fragment | NA | 1.85  |
| S7_k141_88081                               | 9996  | No  | NA | 0    | 1 | Not-determined | Genome-fragment | NA | 0     |
| S8-final-viral-combined_k141_509841[full]   | 2044  | No  | NA | 0    | 2 | Low-quality    | Genome-fragment | NA | 4.26  |
| S7_k141_88096                               | 5676  | No  | NA | 0    | 0 | Not-determined | Genome-fragment | NA | 0     |
| S7_k141_119362                              | 1403  | No  | NA | 0    | 2 | Not-determined | Genome-fragment | NA | 0     |
| S7_k141_231478                              | 1612  | No  | NA | 0    | 2 | Not-determined | Genome-fragment | NA | 0     |
| S8_k141_132589                              | 2044  | No  | NA | 0    | 0 | Low-quality    | Genome-fragment | NA | 4.22  |
| S7_k141_68611                               | 1228  | No  | NA | 0    | 1 | Not-determined | Genome-fragment | NA | 0     |
| S7_k141_26259                               | 3701  | No  | NA | 0    | 1 | Not-determined | Genome-fragment | NA | 0     |
| S9-final-viral-combined_k141_530041112gene  | 2045  | No  | NA | 2    | 0 | Low-quality    | Genome-fragment | NA | 4.93  |
| S7_k141_211159                              | 1107  | No  | NA | 0    | 0 | Not-determined | Genome-fragment | NA | 0     |
| S7_k141_88222                               | 6317  | No  | NA | 0    | 3 | Not-determined | Genome-fragment | NA | 0     |
| S11-final-viral-combined_k141_993531[full]  | 2045  | No  | NA | 1    | 0 | Low-quality    | Genome-fragment | NA | 1.52  |
| S11-final-viral-combined_k141_2989691[full] | 2045  | No  | NA | 0    | 0 | Low-quality    | Genome-fragment | NA | 5.52  |
| S7_k141_191299                              | 1724  | No  | NA | 0    | 2 | Not-determined | Genome-fragment | NA | 0     |
| S7_k141_68727                               | 1807  | No  | NA | 0    | 1 | Not-determined | Genome-fragment | NA | 0     |
| S1_k141_171398                              | 2045  | No  | NA | 0    | 1 | Low-quality    | Genome-fragment | NA | 0.34  |
| S7_k141_26341                               | 1768  | No  | NA | 0    | 2 | Not-determined | Genome-fragment | NA | 0     |
| S7_k141_37969                               | 3733  | No  | NA | 0    | 4 | Not-determined | Genome-fragment | NA | 0     |
| S7_k141_17042                               | 1629  | No  | NA | 0    | 3 | Not-determined | Genome-fragment | NA | 0     |
| S3-final-viral-combined_k141_1323741[full]  | 2045  | No  | NA | 0    | 0 | Low-quality    | Genome-fragment | NA | 3.76  |
| S17-final-viral-combined_k141_78991[full]   | 2045  | No  | NA | 4    | 0 | Low-quality    | Genome-fragment | NA | 2.48  |
| S7_k141_241929                              | 1211  | No  | NA | 0    | 0 | Not-determined | Genome-fragment | NA | 0     |
| S7_k141_17081                               | 1214  | No  | NA | 0    | 0 | Not-determined | Genome-fragment | NA | 0     |
| S7_k141_160468                              | 1233  | No  | NA | 0    | 1 | Not-determined | Genome-fragment | NA | 0     |
| S7_k141_149429                              | 1303  | No  | NA | 0    | 1 | Not-determined | Genome-fragment | NA | 0     |
| S7_k141_26405                               | 1009  | No  | NA | 0    | 0 | Not-determined | Genome-fragment | NA | 0     |
| S12_k141_352005                             | 2045  | No  | NA | 0    | 1 | Low-quality    | Genome-fragment | NA | 0.54  |
| S7_k141_119550                              | 1263  | No  | NA | 0    | 0 | Not-determined | Genome-fragment | NA | 0     |
| S7_k141_38056                               | 1027  | No  | NA | 0    | 0 | Not-determined | Genome-fragment | NA | 0     |
| S7_k141_119578                              | 1016  | No  | NA | 0    | 0 | Not-determined | Genome-fragment | NA | 0     |
| S11-final-viral-combined_k141_252391[full]  | 2046  | No  | NA | 1    | 0 | Low-quality    | Genome-fragment | NA | 6.26  |
| S7_k141_242004                              | 1680  | No  | NA | 0    | 2 | Not-determined | Genome-fragment | NA | 0     |
| S2-final-viral-combined_k141_723801112gene  | 2046  | No  | NA | 2    | 0 | Low-quality    | Genome-fragment | NA | 4.67  |
| S7_k141_219936                              | 1352  | No  | NA | 0    | 2 | Not-determined | Genome-fragment | NA | 0     |
| S5-final-viral-combined_k141_589591112gene  | 2046  | No  | NA | 2    | 0 | Low-quality    | Genome-fragment | NA | 4.67  |
| S7_k141_17183                               | 1214  | No  | NA | 0    | 0 | Not-determined | Genome-fragment | NA | 0     |
| S7_k141_17198                               | 1135  | No  | NA | 0    | 0 | Not-determined | Genome-fragment | NA | 0     |
| S7_k141_219948                              | 3124  | No  | NA | 0    | 0 | Not-determined | Genome-fragment | NA | 0     |
| S7_k141_17204                               | 1867  | No  | NA | 0    | 0 | Not-determined | Genome-fragment | NA | 0     |
| S7_k141_149544                              | 1544  | No  | NA | 0    | 0 | Not-determined | Genome-fragment | NA | 0     |
| S7_k141_6958                                | 1435  | No  | NA | 0    | 1 | Not-determined | Genome-fragment | NA | 0     |
| S7_k141_38048                               | 1551  | No  | NA | 0    | 0 | Not-determined | Genome-fragment | NA | 0     |
| S7_k141_201733                              | 1368  | No  | NA | 0    | 0 | Not-determined | Genome-fragment | NA | 0     |
| S9-final-viral-combined_k141_847311[full]   | 2047  | No  | NA | 0    | 0 | Low-quality    | Genome-fragment | NA | 5.55  |
| S11-final-viral-combined_k141_3269801[full] | 2047  | No  | NA | 0    | 0 | Low-quality    | Genome-fragment | NA | 3.31  |
| S7_k141_108347                              | 1702  | No  | NA | 0    | 1 | Not-determined | Genome-fragment | NA | 0     |
| S7_k141_201817                              | 1403  | No  | NA | 0    | 0 | Not-determined | Genome-fragment | NA | 0     |
| S7_k141_220047                              | 2014  | No  | NA | 0    | 2 | Not-determined | Genome-fragment | NA | 0     |
| S7_k141_298934                              | 3049  | No  | NA | 0    | 2 | Not-determined | Genome-fragment | NA | 0     |
| S7-final-viral-combined_k141_2280501[full]  | 2047  | No  | NA | 0    | 0 | Low-quality    | Genome-fragment | NA | 2.49  |
| S7_k141_7002                                | 1045  | No  | NA | 0    | 0 | Not-determined | Genome-fragment | NA | 0     |
| S7_k141_119824                              | 1013  | No  | NA | 0    | 2 | Not-determined | Genome-fragment | NA | 0     |
| S7_k141_139667                              | 1111  | No  | NA | 0    | 1 | Not-determined | Genome-fragment | NA | 0     |
| S7_k141_108431                              | 1434  | No  | NA | 0    | 0 | Not-determined | Genome-fragment | NA | 0     |
| S7_k141_48067                               | 1030  | No  | NA | 0    | 1 | Not-determined | Genome-fragment | NA | 0     |
| S7_k141_242028                              | 2047  | No  | NA | 0    | 1 | Low-quality    | Genome-fragment | NA | 0.55  |
| S7_k141_7027                                | 3539  | No  | NA | 0    | 4 |                |                 |    |       |



|                                             |       |     |    |   |   |                |                 |    |       |
|---------------------------------------------|-------|-----|----|---|---|----------------|-----------------|----|-------|
| S7_k141_58428                               | 11527 | No  | NA | 0 | 9 | Not-determined | Genome-fragment | NA | 0     |
| S7_k141_211909                              | 1667  | No  | NA | 0 | 0 | Not-determined | Genome-fragment | NA | 0     |
| S7_k141_181197                              | 1604  | No  | NA | 0 | 0 | Not-determined | Genome-fragment | NA | 0     |
| S7_k141_191758                              | 6581  | No  | NA | 0 | 4 | Not-determined | Genome-fragment | NA | 0     |
| S7_k141_48292                               | 1013  | No  | NA | 0 | 0 | Not-determined | Genome-fragment | NA | 0     |
| S7-final-viral-combined_k141_38951  full    | 2049  | No  | NA | 0 | 0 | Low-quality    | Genome-fragment | NA | 3.66  |
| S7_k141_191784                              | 4509  | No  | NA | 0 | 3 | Not-determined | Genome-fragment | NA | 0     |
| S2-final-viral-combined_k141_96359  full    | 2049  | No  | NA | 0 | 2 | Low-quality    | Genome-fragment | NA | 3.68  |
| S7_k141_26660                               | 1175  | No  | NA | 0 | 0 | Low-quality    | Genome-fragment | NA | 0     |
| S2_k141_11083                               | 2049  | No  | NA | 0 | 0 | Low-quality    | Genome-fragment | NA | 2.56  |
| S7_k141_139795                              | 1434  | No  | NA | 0 | 0 | Not-determined | Genome-fragment | NA | 0     |
| S6-final-viral-combined_k141_84528  full    | 2049  | No  | NA | 1 | 0 | Low-quality    | Genome-fragment | NA | 3.07  |
| S7_k141_78238                               | 1035  | No  | NA | 0 | 2 | Not-determined | Genome-fragment | NA | 0     |
| S11-final-viral-combined_k141_230287  full  | 2050  | No  | NA | 1 | 0 | Low-quality    | Genome-fragment | NA | 3.75  |
| S7_k141_191835                              | 1098  | No  | NA | 0 | 1 | Not-determined | Genome-fragment | NA | 0     |
| S7_k141_99115                               | 14829 | No  | NA | 0 | 2 | Not-determined | Genome-fragment | NA | 0     |
| S7_k141_232174                              | 6907  | No  | NA | 0 | 4 | Not-determined | Genome-fragment | NA | 0     |
| S7_k141_99235                               | 3569  | No  | NA | 0 | 0 | Not-determined | Genome-fragment | NA | 0     |
| S5-final-viral-combined_k141_130796  full   | 2050  | No  | NA | 3 | 0 | Low-quality    | Genome-fragment | NA | 4.49  |
| S7_k141_232182                              | 1109  | No  | NA | 0 | 1 | Not-determined | Genome-fragment | NA | 0     |
| S7_k141_120169                              | 1213  | No  | NA | 0 | 0 | Not-determined | Genome-fragment | NA | 0     |
| S7_k141_202150                              | 1010  | No  | NA | 0 | 0 | Not-determined | Genome-fragment | NA | 0     |
| S7_k141_145978                              | 3790  | No  | NA | 0 | 2 | Not-determined | Genome-fragment | NA | 0     |
| S7_k141_38400                               | 1014  | No  | NA | 0 | 1 | Not-determined | Genome-fragment | NA | 0     |
| S7_k141_78291                               | 1599  | No  | NA | 0 | 1 | Not-determined | Genome-fragment | NA | 0     |
| S7_k141_38417                               | 3158  | No  | NA | 0 | 2 | Not-determined | Genome-fragment | NA | 0     |
| S7_k141_88748                               | 4045  | No  | NA | 0 | 2 | Not-determined | Genome-fragment | NA | 0     |
| S7_k141_58615                               | 1267  | No  | NA | 0 | 0 | Not-determined | Genome-fragment | NA | 0     |
| S17-final-viral-combined_k141_23451  full   | 2050  | No  | NA | 0 | 0 | Low-quality    | Genome-fragment | NA | 3.75  |
| S7_k141_69338                               | 1506  | No  | NA | 0 | 1 | Not-determined | Genome-fragment | NA | 0     |
| S7_k141_7254                                | 1066  | No  | NA | 0 | 1 | Not-determined | Genome-fragment | NA | 0     |
| S7_k141_181458                              | 1161  | No  | NA | 0 | 2 | Not-determined | Genome-fragment | NA | 0     |
| S7_k141_48465                               | 1016  | No  | NA | 0 | 1 | Not-determined | Genome-fragment | NA | 0     |
| S17-final-viral-combined_k141_58526  full   | 2050  | No  | NA | 0 | 2 | Low-quality    | Genome-fragment | NA | 2.96  |
| S7_k141_202270                              | 1698  | No  | NA | 0 | 0 | Not-determined | Genome-fragment | NA | 0     |
| S7_k141_88801                               | 1161  | No  | NA | 0 | 0 | Not-determined | Genome-fragment | NA | 0     |
| S8-final-viral-combined_k141_147247  H2gene | 2050  | No  | NA | 1 | 0 | Low-quality    | Genome-fragment | NA | 5.93  |
| S7_k141_58677                               | 4357  | No  | NA | 0 | 2 | Not-determined | Genome-fragment | NA | 0     |
| S7_k141_181511                              | 1449  | No  | NA | 0 | 0 | Not-determined | Genome-fragment | NA | 0     |
| S7_k141_78394                               | 2196  | No  | NA | 0 | 0 | Not-determined | Genome-fragment | NA | 0     |
| S7_k141_58723                               | 1166  | No  | NA | 0 | 0 | Not-determined | Genome-fragment | NA | 0     |
| S7_k141_212158                              | 1310  | No  | NA | 0 | 1 | Not-determined | Genome-fragment | NA | 0     |
| S1-final-viral-combined_k141_270009  full   | 2051  | No  | NA | 3 | 0 | Low-quality    | Genome-fragment | NA | 4.33  |
| S17-final-viral-combined_k141_60660  full   | 2051  | No  | NA | 1 | 0 | Low-quality    | Genome-fragment | NA | 4.48  |
| S7_k141_161361                              | 2047  | No  | NA | 0 | 0 | Not-determined | Genome-fragment | NA | 0     |
| S7_k141_212191                              | 1271  | No  | NA | 0 | 0 | Not-determined | Genome-fragment | NA | 0     |
| S7_k141_130299                              | 2014  | No  | NA | 0 | 1 | Not-determined | Genome-fragment | NA | 0     |
| S7_k141_130300                              | 1734  | No  | NA | 0 | 0 | Not-determined | Genome-fragment | NA | 0     |
| S12-final-viral-combined_k141_357226  full  | 2051  | No  | NA | 0 | 1 | Low-quality    | Genome-fragment | NA | 3.27  |
| S7_k141_212201                              | 1152  | No  | NA | 0 | 1 | Not-determined | Genome-fragment | NA | 0     |
| S12-final-viral-combined_k141_123803  full  | 2051  | No  | NA | 0 | 0 | Low-quality    | Genome-fragment | NA | 1.12  |
| S7_k141_7413                                | 2246  | No  | NA | 0 | 0 | Not-determined | Genome-fragment | NA | 0     |
| S7_k141_130360                              | 19339 | No  | NA | 0 | 7 | Not-determined | Genome-fragment | NA | 0     |
| S2-final-viral-combined_k141_223120  full   | 2051  | No  | NA | 0 | 1 | Low-quality    | Genome-fragment | NA | 4.07  |
| S7_k141_130262                              | 3042  | No  | NA | 0 | 2 | Not-determined | Genome-fragment | NA | 0     |
| S7_k141_17742                               | 3234  | No  | NA | 0 | 0 | Not-determined | Genome-fragment | NA | 0     |
| S7_k141_192052                              | 1113  | No  | NA | 0 | 0 | Not-determined | Genome-fragment | NA | 0     |
| S2-final-viral-combined_k141_205951  full   | 2051  | No  | NA | 1 | 0 | Low-quality    | Genome-fragment | NA | 5.04  |
| S7_k141_108093                              | 1455  | No  | NA | 0 | 0 | Not-determined | Genome-fragment | NA | 0     |
| S7_k141_178967                              | 2052  | No  | NA | 0 | 1 | Low-quality    | Genome-fragment | NA | 0.38  |
| S7_k141_88931                               | 2873  | No  | NA | 0 | 1 | Not-determined | Genome-fragment | NA | 0     |
| S7_k141_58861                               | 2155  | No  | NA | 0 | 3 | Not-determined | Genome-fragment | NA | 0     |
| S7_k141_181640                              | 4393  | No  | NA | 0 | 8 | Not-determined | Genome-fragment | NA | 0     |
| S7_k141_202479                              | 1579  | No  | NA | 0 | 0 | Not-determined | Genome-fragment | NA | 0     |
| S17-final-viral-combined_k141_7349  full    | 2052  | No  | NA | 2 | 0 | Low-quality    | Genome-fragment | NA | 2.5   |
| S7_k141_99501                               | 3081  | No  | NA | 0 | 0 | Not-determined | Genome-fragment | NA | 0     |
| S7_k141_38796                               | 1383  | No  | NA | 0 | 0 | Not-determined | Genome-fragment | NA | 0     |
| S12-final-viral-combined_k141_334947  full  | 2052  | No  | NA | 0 | 1 | Low-quality    | Genome-fragment | NA | 1.18  |
| S7_k141_68482                               | 2324  | No  | NA | 0 | 0 | Not-determined | Genome-fragment | NA | 0     |
| S7_k141_202545                              | 4479  | No  | NA | 0 | 3 | Not-determined | Genome-fragment | NA | 0     |
| S7_k141_38861                               | 1167  | No  | NA | 0 | 0 | Not-determined | Genome-fragment | NA | 0     |
| S7_k141_109033                              | 2089  | No  | NA | 0 | 1 | Not-determined | Genome-fragment | NA | 0     |
| S7_k141_48761                               | 1468  | No  | NA | 0 | 6 | Not-determined | Genome-fragment | NA | 0     |
| S7_k141_69526                               | 1155  | No  | NA | 0 | 0 | Not-determined | Genome-fragment | NA | 0     |
| S12-final-viral-combined_k141_354280  full  | 2052  | No  | NA | 0 | 2 | Low-quality    | Genome-fragment | NA | 0.96  |
| S7_k141_161525                              | 1140  | No  | NA | 0 | 1 | Not-determined | Genome-fragment | NA | 0     |
| S7_k141_78659                               | 1205  | No  | NA | 0 | 1 | Not-determined | Genome-fragment | NA | 0     |
| S2-final-viral-combined_k141_68266  full    | 2052  | No  | NA | 0 | 2 | Low-quality    | Genome-fragment | NA | 4.9   |
| S7_k141_69545                               | 1079  | No  | NA | 0 | 0 | Not-determined | Genome-fragment | NA | 0     |
| S7_k141_202592                              | 1519  | No  | NA | 0 | 1 | Not-determined | Genome-fragment | NA | 0     |
| S1-final-viral-combined_k141_228648  full   | 2053  | No  | NA | 0 | 2 | Low-quality    | Genome-fragment | NA | 2.45  |
| S7_k141_191805                              | 1215  | No  | NA | 0 | 0 | Not-determined | Genome-fragment | NA | 0     |
| S7_k141_130586                              | 1515  | No  | NA | 0 | 2 | Not-determined | Genome-fragment | NA | 0     |
| S5-final-viral-combined_k141_172786  full   | 2053  | No  | NA | 3 | 0 | Low-quality    | Genome-fragment | NA | 4.68  |
| S7_k141_220555                              | 3662  | No  | NA | 0 | 1 | Not-determined | Genome-fragment | NA | 0     |
| S5_k141_34012                               | 2053  | No  | NA | 1 | 0 | Low-quality    | Genome-fragment | NA | 5.11  |
| S7_k141_78721                               | 2435  | No  | NA | 0 | 1 | Not-determined | Genome-fragment | NA | 0     |
| S7-final-viral-combined_k141_78807  full    | 2053  | Yes | NA | 1 | 1 | Low-quality    | Genome-fragment | NA | 1.65  |
| S7_k141_48875                               | 1313  | No  | NA | 0 | 0 | Not-determined | Genome-fragment | NA | 53.53 |
| S7_k141_139599                              | 1721  | No  | NA | 0 | 1 | Not-determined | Genome-fragment | NA | 0     |
| S7_k141_69637                               | 1031  | No  | NA | 0 | 0 | Not-determined | Genome-fragment | NA | 0     |
| S17-final-viral-combined_k141_183309  full  | 2053  | No  | NA | 0 | 0 | Low-quality    | Genome-fragment | NA | 5.83  |
| S7_k141_202730                              | 1981  | No  | NA | 0 | 0 | Not-determined | Genome-fragment | NA | 0     |
| S7_k141_181878                              | 6675  | No  | NA | 0 | 1 | Not-determined | Genome-fragment | NA | 0     |
| S7_k141_48956                               | 1106  | No  | NA | 0 | 1 | Not-determined | Genome-fragment | NA | 0     |
| S7_k141_171423                              | 1113  | No  | NA | 0 | 0 | Not-determined | Genome-fragment | NA | 0     |
| S7_k141_232657                              | 1630  | No  | NA | 0 | 0 | Not-determined | Genome-fragment | NA | 0     |
| S7_k141_39036                               | 1039  | No  | NA | 0 | 0 | Not-determined | Genome-fragment | NA | 0     |
| S12-final-viral-combined_k141_270194  full  | 2053  | No  | NA | 1 | 0 | Low-quality    | Genome-fragment | NA | 3.96  |
| S7_k141_242462                              | 3187  | No  | NA | 0 | 1 | Not-determined | Genome-fragment | NA | 0     |
| S2-final-viral-combined_k141_130027  full   | 2053  | No  | NA | 0 | 2 | Low-quality    | Genome-fragment | NA | 1.53  |
| S7_k141_13082                               | 3609  | No  | NA | 0 | 0 | Not-determined | Genome-fragment | NA | 0     |
| S7_k141_130789                              | 8513  | No  | NA | 0 | 8 | Not-determined | Genome-fragment | NA | 0     |
| S7_k141_130790                              | 1132  | No  | NA | 0 | 2 | Not-determined | Genome-fragment | NA | 0     |
| S7_k141_120538                              | 1355  | No  | NA | 0 | 1 | Not-determined | Genome-fragment | NA | 0     |
| S7_k141_242506                              | 1222  | No  | NA | 0 | 0 | Not-determined | Genome-fragment | NA | 0     |
| S7_k141_192344                              | 1843  | No  | NA | 0 | 0 | Not-determined | Genome-fragment | NA | 0     |
| S7_k141_192365                              | 1140  | No  | NA | 0 | 0 | Not-determined | Genome-fragment | NA | 0     |
| S7_k141_237781                              | 2231  | No  | NA | 0 | 2 | Not-determined | Genome-fragment | NA | 0     |
| S4-final-viral-combined_k141_73257  full    | 2053  | No  | NA | 1 | 0 | Low-quality    | Genome-fragment | NA | 3.43  |
| S7_k141_59267                               | 1321  | No  | NA | 0 | 0 | Not-determined | Genome-fragment | NA | 4.92  |
| S1-final-viral-combined_k141_123434  full   | 2054  | No  | NA | 3 | 0 | Low-quality    | Genome-fragment | NA | 0     |
| S7_k141_99894                               | 1808  | No  | NA | 0 | 2 | Not-determined | Genome-fragment | NA | 0     |
| S7_k141_150521                              | 2888  | No  | NA | 0 | 2 | Not-determined | Genome-fragment | NA | 0     |
| S7_k141_18162                               | 1018  | No  | NA | 0 | 0 | Not-determined | Genome-fragment | NA | 0     |
| S7_k141_192454                              | 1089  | No  | NA | 0 | 1 | Not-determined | Genome-fragment | NA | 0     |
| S7_k141_232892                              | 1106  | No  | NA | 0 | 0 | Not-determined | Genome-fragment | NA | 0     |
| S7_k141_220788                              | 1829  | No  | NA | 0 | 0 | Not-determined | Genome-fragment | NA | 0     |
| S12-final-viral-combined_k141_293338  full  | 2054  | No  | NA | 1 | 0 | Low-quality    | Genome-fragment | NA | 3.77  |
| S7_k141_220798                              | 1080  | No  | NA | 0 | 0 | Not-determined | Genome-fragment | NA | 0     |
| S12-final-viral-combined_k141_160933  full  | 2054  | No  | NA | 0 | 1 | Low-quality    | Genome-fragment | NA | 1.89  |
| S7_k141_39149                               | 3075  | No  | NA | 0 | 1 | Not-determined | Genome-fragment | NA | 0     |
| S7_k141_220835                              | 2133  | No  | NA | 0 | 4 | Not-determined | Genome-fragment | NA | 0     |
| S2-final-viral-combined_k141_164163  full   | 2054  | No  | NA | 1 | 0 | Low-quality    | Genome-fragment | NA | 6.08  |
| S7_k141_99973                               | 1809  | No  | NA | 0 | 1 | Not-determined | Genome-fragment | NA | 0     |
| S8_k141_74345                               | 2054  | No  | NA | 0 | 2 | Low-quality    | Genome-fragment | NA | 1.31  |
| S1-final-viral-combined_k141_57756  full    | 2055  | No  | NA | 0 | 2 | Low-quality    | Genome-fragment | NA | 3.57  |
| S7_k141_220861                              | 2083  | No  | NA | 0 | 0 | Not-determined | Genome-fragment | NA | 0     |
| S7-final-viral-combined_k141_123922  full   | 2055  | No  | NA | 0 | 0 | Low-quality    | Genome-fragment | NA | 4.16  |
| S7-final-viral-combined_k141_118243  full   | 2055  | No  | NA | 1 | 0 | Low-quality    | Genome-fragment | NA | 5.26  |
| S7_k141_161918                              | 1282  | No  | NA | 0 | 1 | Not-determined | Genome-fragment | NA | 4.23  |
| S12_k141_25316                              | 2055  | No  | NA | 1 | 0 | Low-quality    | Genome-fragment | NA | 0     |
| S7_k141_150672                              | 4678  | No  | NA | 0 | 0 | Not-determined | Genome-fragment | NA | 0     |
| S7_k141_49237                               | 1021  | No  | NA | 0 | 0 | Not-determined | Genome-fragment | NA | 0     |
| S7_k141_120688                              | 1149  | No  | NA | 0 | 0 | Not-determined | Genome-fragment | NA | 0     |
| S7_k141_192558                              | 1405  | No  | NA | 0 | 1 | Not-determined | Genome-fragment | NA | 0     |
| S7_k141_171722                              | 1388  | No  | NA | 0 | 2 | Not-determined | Genome-fragment | NA | 0     |
| S7_k141_203208                              | 1124  | No  | NA | 0 | 0 | Not-determined | Genome-fragment | NA | 0     |
| S7_k141_182234                              | 1891  | No  | NA | 0 | 5 | Not-determined | Genome-fragment | NA | 0     |
| S7_k141_212777                              | 1251  | No  | NA | 0 | 0 | Not-determined | Genome-fragment | NA | 0     |
| S7_k141_192598                              | 1826  | No  | NA | 0 | 2 | Not-determined | Genome-fragment | NA | 0     |
| S7_k141_18276                               | 1826  | No  | NA | 0 | 0 | Not-determined | Genome-fragment | NA | 0     |
| S7_k141_39291                               | 7642  | No  | NA | 0 | 4 | Not-determined | Genome-fragment | NA | 0     |
| S7_k141_233050                              | 1024  | No  | NA | 0 | 1 | Not-determined | Genome-fragment | NA | 0     |
| S7_k141_203282                              | 1094  | No  | NA | 0 | 1 | Not-determined | Genome-fragment | NA | 0     |
| S7_k141_69898                               | 1039  | No  |    |   |   |                |                 |    |       |



|                                                |       |     |      |    |   |                |                 |    |       |
|------------------------------------------------|-------|-----|------|----|---|----------------|-----------------|----|-------|
| S7_k141_242853                                 | 3104  | No  | NA   | 0  | 3 | Not-determined | Genome-fragment | NA | 0     |
| S7_k141_130927                                 | 8361  | No  | NA   | 0  | 4 | Not-determined | Genome-fragment | NA | 0     |
| S12-final-viral-combined_k141_1610151[full]    | 2056  | No  | NA   | 3  | 0 | Low-quality    | Genome-fragment | NA | 5.48  |
| S7_k141_171975                                 | 5868  | No  | NA   | 0  | 2 | Not-determined | Genome-fragment | NA | 0     |
| S7_k141_203588                                 | 1073  | No  | NA   | 0  | 1 | Not-determined | Genome-fragment | NA | 0     |
| S7_k141_70070                                  | 1815  | No  | NA   | 0  | 0 | Not-determined | Genome-fragment | NA | 0     |
| S7_k141_100361                                 | 1043  | No  | NA   | 0  | 2 | Not-determined | Genome-fragment | NA | 0     |
| S7_k141_130956                                 | 1411  | No  | NA   | 0  | 0 | Not-determined | Genome-fragment | NA | 0     |
| S12_k141_349135                                | 2056  | No  | NA   | 1  | 0 | Low-quality    | Genome-fragment | NA | 30.12 |
| S7_k141_192953                                 | 1609  | No  | NA   | 0  | 3 | Not-determined | Genome-fragment | NA | 0     |
| S1-final-viral-combined_k141_2688241[full]     | 2057  | No  | NA   | 0  | 0 | Low-quality    | Genome-fragment | NA | 5.27  |
| S7_k141_79268                                  | 1147  | No  | NA   | 0  | 0 | Not-determined | Genome-fragment | NA | 0     |
| S7_k141_105888                                 | 1172  | No  | NA   | 0  | 0 | Not-determined | Genome-fragment | NA | 0     |
| S12-final-viral-combined_k141_3097491[full]    | 2057  | No  | NA   | 0  | 1 | Low-quality    | Genome-fragment | NA | 1.68  |
| S7_k141_70145                                  | 1141  | No  | NA   | 0  | 0 | Not-determined | Genome-fragment | NA | 0     |
| S7_k141_172038                                 | 1319  | No  | NA   | 0  | 0 | Not-determined | Genome-fragment | NA | 0     |
| S7_k141_140570                                 | 2080  | No  | NA   | 0  | 0 | Not-determined | Genome-fragment | NA | 0     |
| S7_k141_233413                                 | 1060  | No  | NA   | 0  | 0 | Not-determined | Genome-fragment | NA | 0     |
| S7_k141_59791                                  | 6158  | No  | NA   | 0  | 2 | Not-determined | Genome-fragment | NA | 0     |
| S7_k141_221280                                 | 2008  | No  | NA   | 0  | 1 | Not-determined | Genome-fragment | NA | 0     |
| S7_k141_172079                                 | 1152  | No  | NA   | 0  | 0 | Not-determined | Genome-fragment | NA | 0     |
| S7_k141_39673                                  | 1147  | No  | NA   | 0  | 1 | Not-determined | Genome-fragment | NA | 0     |
| S12-final-viral-combined_k141_2608681[full]    | 2057  | No  | NA   | 1  | 0 | Low-quality    | Genome-fragment | NA | 0.74  |
| S7_k141_100478                                 | 4669  | No  | NA   | 0  | 4 | Not-determined | Genome-fragment | NA | 0     |
| S7_k141_39681                                  | 1705  | No  | NA   | 0  | 1 | Not-determined | Genome-fragment | NA | 0     |
| S7_k141_49769                                  | 2651  | No  | NA   | 0  | 0 | Not-determined | Genome-fragment | NA | 0     |
| S7_k141_193085                                 | 1021  | No  | NA   | 0  | 1 | Not-determined | Genome-fragment | NA | 0     |
| S2-final-viral-combined_k141_2342561[full]     | 2057  | No  | NA   | 0  | 0 | Low-quality    | Genome-fragment | NA | 4.21  |
| S8-final-viral-combined_k141_380851[full]      | 2057  | No  | NA   | 1  | 0 | Low-quality    | Genome-fragment | NA | 4.06  |
| S7_k141_49796                                  | 1478  | No  | NA   | 0  | 0 | Not-determined | Genome-fragment | NA | 0     |
| S7_k141_233527                                 | 5041  | No  | NA   | 0  | 1 | Not-determined | Genome-fragment | NA | 0     |
| S7_k141_110020                                 | 2921  | No  | NA   | 0  | 2 | Not-determined | Genome-fragment | NA | 0     |
| S8-final-viral-combined_k141_296871[full]      | 2057  | No  | NA   | 0  | 1 | Low-quality    | Genome-fragment | NA | 0.92  |
| S7_k141_8489                                   | 1900  | No  | NA   | 0  | 2 | Not-determined | Genome-fragment | NA | 0     |
| S7_k141_243123                                 | 1273  | No  | NA   | 0  | 1 | Not-determined | Genome-fragment | NA | 0     |
| S7_k141_80683                                  | 1307  | No  | NA   | 0  | 1 | Not-determined | Genome-fragment | NA | 0     |
| S7_k141_131193                                 | 1835  | No  | NA   | 0  | 0 | Not-determined | Genome-fragment | NA | 0     |
| S7_k141_151112                                 | 28365 | No  | NA   | 13 | 1 | Medium-quality | Genome-fragment | NA | 66.55 |
| S7_k141_89719                                  | 1316  | No  | NA   | 0  | 1 | Not-determined | Genome-fragment | NA | 0     |
| S7_k141_213137                                 | 1081  | No  | NA   | 0  | 0 | Not-determined | Genome-fragment | NA | 0     |
| S7_k141_193191                                 | 3219  | No  | NA   | 0  | 0 | Not-determined | Genome-fragment | NA | 0     |
| S7_k141_202893                                 | 1152  | No  | NA   | 0  | 0 | Not-determined | Genome-fragment | NA | 0     |
| S7_k141_193203                                 | 1175  | No  | NA   | 0  | 0 | Not-determined | Genome-fragment | NA | 0     |
| S7_k141_121393                                 | 1248  | No  | NA   | 0  | 1 | Not-determined | Genome-fragment | NA | 0     |
| S7_k141_39793                                  | 1473  | No  | NA   | 0  | 0 | Not-determined | Genome-fragment | NA | 0     |
| S9-final-viral-combined_k141_877431[full]      | 2058  | No  | NA   | 1  | 0 | Low-quality    | Genome-fragment | NA | 6.68  |
| S7_k141_8576                                   | 3041  | No  | NA   | 0  | 0 | Not-determined | Genome-fragment | NA | 0     |
| S7_k141_213198                                 | 1912  | No  | NA   | 0  | 1 | Not-determined | Genome-fragment | NA | 0     |
| S7_k141_203944                                 | 1260  | No  | NA   | 0  | 0 | Not-determined | Genome-fragment | NA | 0     |
| S7_k141_151211                                 | 1051  | No  | NA   | 0  | 2 | Not-determined | Genome-fragment | NA | 0     |
| S7_k141_50019                                  | 1150  | No  | NA   | 0  | 1 | Not-determined | Genome-fragment | NA | 0     |
| S7_k141_15802                                  | 2870  | No  | NA   | 0  | 0 | Not-determined | Genome-fragment | NA | 0     |
| S7_k141_89798                                  | 1016  | No  | NA   | 0  | 0 | Not-determined | Genome-fragment | NA | 0     |
| S7_k141_79461                                  | 1099  | No  | NA   | 0  | 1 | Not-determined | Genome-fragment | NA | 0     |
| S7_k141_100606                                 | 1022  | No  | NA   | 0  | 1 | Not-determined | Genome-fragment | NA | 0     |
| S7_k141_162435                                 | 13809 | No  | NA   | 0  | 8 | Not-determined | Genome-fragment | NA | 0     |
| S7_k141_221514                                 | 1161  | No  | NA   | 0  | 0 | Not-determined | Genome-fragment | NA | 0     |
| S7_k141_110182                                 | 4685  | No  | NA   | 0  | 0 | Not-determined | Genome-fragment | NA | 0     |
| S9_k141_49821                                  | 2058  | No  | NA   | 0  | 1 | Low-quality    | Genome-fragment | NA | 0.76  |
| S7_k141_110202                                 | 1505  | No  | NA   | 0  | 1 | Not-determined | Genome-fragment | NA | 0     |
| S7_k141_131340                                 | 1604  | No  | NA   | 0  | 2 | Not-determined | Genome-fragment | NA | 0     |
| S7_k141_233833                                 | 1051  | No  | NA   | 0  | 0 | Not-determined | Genome-fragment | NA | 0     |
| S7_k141_100658                                 | 1244  | No  | NA   | 0  | 0 | Not-determined | Genome-fragment | NA | 0     |
| S7_k141_121588                                 | 3827  | No  | NA   | 0  | 1 | Not-determined | Genome-fragment | NA | 0     |
| S7_k141_172374                                 | 1041  | No  | NA   | 0  | 0 | Not-determined | Genome-fragment | NA | 0     |
| S7_k141_165356                                 | 1184  | No  | NA   | 0  | 1 | Not-determined | Genome-fragment | NA | 0     |
| S7_k141_193409                                 | 1670  | No  | NA   | 0  | 1 | Not-determined | Genome-fragment | NA | 0     |
| S7_k141_131422                                 | 1055  | No  | NA   | 0  | 1 | Not-determined | Genome-fragment | NA | 0     |
| S7_k141_100700                                 | 1116  | No  | NA   | 0  | 0 | Not-determined | Genome-fragment | NA | 0     |
| S11-final-viral-combined_k141_578071[full]     | 2058  | No  | NA   | 1  | 0 | Low-quality    | Genome-fragment | NA | 4.06  |
| S7_k141_39949                                  | 1031  | No  | NA   | 0  | 0 | Not-determined | Genome-fragment | NA | 0     |
| S7_k141_110180                                 | 1071  | No  | NA   | 0  | 0 | Not-determined | Genome-fragment | NA | 0     |
| S7_k141_39964                                  | 1313  | No  | NA   | 0  | 1 | Not-determined | Genome-fragment | NA | 0     |
| S5-final-viral-combined_k141_223711[full]      | 2058  | No  | NA   | 0  | 2 | Low-quality    | Genome-fragment | NA | 1.49  |
| S7_k141_39969                                  | 1003  | No  | NA   | 0  | 1 | Not-determined | Genome-fragment | NA | 0     |
| S7_k141_233954                                 | 1585  | No  | NA   | 0  | 2 | Not-determined | Genome-fragment | NA | 0     |
| S5-final-viral-combined_k141_2024091[full]     | 2058  | No  | NA   | 2  | 0 | Low-quality    | Genome-fragment | NA | 5.52  |
| S7_k141_151401                                 | 1313  | No  | NA   | 0  | 1 | Not-determined | Genome-fragment | NA | 0     |
| S7_k141_27440                                  | 1153  | No  | NA   | 0  | 1 | Not-determined | Genome-fragment | NA | 0     |
| S7_k141_243279                                 | 1795  | No  | NA   | 0  | 0 | Not-determined | Genome-fragment | NA | 0     |
| S17-final-viral-combined_k141_2060591[112]gene | 2058  | No  | NA   | 1  | 0 | Low-quality    | Genome-fragment | NA | 3.45  |
| S7_k141_18696                                  | 3600  | No  | NA   | 0  | 1 | Not-determined | Genome-fragment | NA | 0     |
| S7_k141_121688                                 | 1221  | No  | NA   | 0  | 2 | Not-determined | Genome-fragment | NA | 0     |
| S17_k141_142391                                | 2058  | No  | NA   | 0  | 1 | Low-quality    | Genome-fragment | NA | 0.77  |
| S7_k141_50289                                  | 1007  | No  | NA   | 0  | 1 | Not-determined | Genome-fragment | NA | 0     |
| S7_k141_70692                                  | 1495  | No  | NA   | 0  | 0 | Not-determined | Genome-fragment | NA | 0     |
| S7_k141_79626                                  | 1980  | No  | NA   | 0  | 0 | Not-determined | Genome-fragment | NA | 0     |
| S8-final-viral-combined_k141_1154471[full]     | 2058  | No  | NA   | 0  | 0 | Low-quality    | Genome-fragment | NA | 4.75  |
| S7_k141_213486                                 | 3628  | No  | NA   | 0  | 2 | Not-determined | Genome-fragment | NA | 0     |
| S11-final-viral-combined_k141_2593411[full]    | 2059  | No  | NA   | 0  | 0 | Low-quality    | Genome-fragment | NA | 3.75  |
| S12-final-viral-combined_k141_583901[full]     | 2059  | No  | NA   | 0  | 1 | Low-quality    | Genome-fragment | NA | 4.33  |
| S7_k141_162566                                 | 1152  | No  | NA   | 0  | 1 | Not-determined | Genome-fragment | NA | 0     |
| S7-final-viral-combined_k141_2173681[full]     | 2059  | Yes | 1483 | 1  | 1 | Low-quality    | Genome-fragment | NA | 4.17  |
| S7_k141_193584                                 | 1428  | No  | NA   | 0  | 3 | Not-determined | Genome-fragment | NA | 0     |
| S7_k141_221695                                 | 1559  | No  | NA   | 0  | 1 | Not-determined | Genome-fragment | NA | 0     |
| S7_k141_50349                                  | 1017  | No  | NA   | 0  | 0 | Not-determined | Genome-fragment | NA | 0     |
| S7_k141_182986                                 | 3750  | No  | NA   | 0  | 2 | Not-determined | Genome-fragment | NA | 0     |
| S7_k141_151527                                 | 3791  | No  | NA   | 0  | 1 | Not-determined | Genome-fragment | NA | 0     |
| S7_k141_241404                                 | 3297  | No  | NA   | 0  | 2 | Not-determined | Genome-fragment | NA | 0     |
| S2-final-viral-combined_k141_643271[full]      | 2059  | No  | NA   | 0  | 0 | Low-quality    | Genome-fragment | NA | 4.39  |
| S7_k141_70823                                  | 1079  | No  | NA   | 0  | 0 | Not-determined | Genome-fragment | NA | 0     |
| S7_k141_90136                                  | 1897  | No  | NA   | 0  | 2 | Not-determined | Genome-fragment | NA | 0     |
| S7_k141_141059                                 | 1669  | No  | NA   | 0  | 2 | Not-determined | Genome-fragment | NA | 0     |
| S2-final-viral-combined_k141_2372981[full]     | 2059  | No  | NA   | 1  | 0 | Low-quality    | Genome-fragment | NA | 1.16  |
| S7_k141_70861                                  | 1443  | No  | NA   | 0  | 1 | Not-determined | Genome-fragment | NA | 0     |
| S6-final-viral-combined_k141_965021[full]      | 2059  | No  | NA   | 1  | 0 | Low-quality    | Genome-fragment | NA | 3.53  |
| S7_k141_213645                                 | 1106  | No  | NA   | 0  | 1 | Not-determined | Genome-fragment | NA | 0     |
| S8_k141_165908                                 | 2059  | No  | NA   | 1  | 0 | Low-quality    | Genome-fragment | NA | 1.21  |
| S7_k141_241479                                 | 1659  | No  | NA   | 0  | 1 | Not-determined | Genome-fragment | NA | 0     |
| S7_k141_70906                                  | 6602  | No  | NA   | 0  | 6 | Not-determined | Genome-fragment | NA | 0     |
| S1-final-viral-combined_k141_302491[full]      | 2060  | No  | NA   | 0  | 0 | Low-quality    | Genome-fragment | NA | 1.21  |
| S17-final-viral-combined_k141_955111[full]     | 2060  | No  | NA   | 1  | 0 | Low-quality    | Genome-fragment | NA | 1.33  |
| S7_k141_60341                                  | 6672  | No  | NA   | 0  | 1 | Not-determined | Genome-fragment | NA | 0     |
| S7_k141_110608                                 | 1284  | No  | NA   | 0  | 2 | Not-determined | Genome-fragment | NA | 0     |
| S7_k141_60371                                  | 1173  | No  | NA   | 0  | 0 | Not-determined | Genome-fragment | NA | 0     |
| S7_k141_213732                                 | 3015  | No  | NA   | 0  | 0 | Not-determined | Genome-fragment | NA | 0     |
| S7_k141_121988                                 | 1443  | No  | NA   | 0  | 1 | Not-determined | Genome-fragment | NA | 0     |
| S17-final-viral-combined_k141_1662461[full]    | 2060  | No  | NA   | 0  | 1 | Low-quality    | Genome-fragment | NA | 1.25  |
| S12-final-viral-combined_k141_2501471[full]    | 2060  | No  | NA   | 0  | 1 | Low-quality    | Genome-fragment | NA | 3.13  |
| S7_k141_71029                                  | 9814  | No  | NA   | 0  | 2 | Not-determined | Genome-fragment | NA | 0     |
| S7_k141_18923                                  | 1992  | No  | NA   | 0  | 1 | Not-determined | Genome-fragment | NA | 0     |
| S7_k141_8864                                   | 5651  | No  | NA   | 0  | 6 | Not-determined | Genome-fragment | NA | 0     |
| S7_k141_8867                                   | 1641  | No  | NA   | 0  | 1 | Not-determined | Genome-fragment | NA | 0     |
| S7_k141_122054                                 | 3740  | No  | NA   | 0  | 1 | Not-determined | Genome-fragment | NA | 0     |
| S11-final-viral-combined_k141_734501[full]     | 2061  | No  | NA   | 2  | 0 | Low-quality    | Genome-fragment | NA | 5.53  |
| S7_k141_50718                                  | 3529  | No  | NA   | 0  | 1 | Not-determined | Genome-fragment | NA | 0     |
| S7_k141_79790                                  | 5185  | No  | NA   | 0  | 2 | Not-determined | Genome-fragment | NA | 0     |
| S7_k141_222005                                 | 1408  | No  | NA   | 0  | 0 | Not-determined | Genome-fragment | NA | 0     |
| S7_k141_151635                                 | 3258  | No  | NA   | 0  | 0 | Not-determined | Genome-fragment | NA | 0     |
| S1-final-viral-combined_k141_2028051[full]     | 2061  | No  | NA   | 0  | 0 | Low-quality    | Genome-fragment | NA | 1.13  |
| S7_k141_243676                                 | 1270  | No  | NA   | 0  | 1 | Not-determined | Genome-fragment | NA | 0     |
| S7_k141_101110                                 | 3389  | No  | NA   | 0  | 1 | Not-determined | Genome-fragment | NA | 0     |
| S7_k141_101111                                 | 1220  | No  | NA   | 0  | 1 | Not-determined | Genome-fragment | NA | 0     |
| S7_k141_213884                                 | 1075  | No  | NA   | 0  | 0 | Not-determined | Genome-fragment | NA | 0     |
| S7_k141_243707                                 | 1101  | No  | NA   | 0  | 1 | Not-determined | Genome-fragment | NA | 0     |
| S7_k141_50778                                  | 1707  | No  | NA   | 0  | 1 | Not-determined | Genome-fragment | NA | 0     |
| S7_k141_222064                                 | 1573  | No  | NA   | 0  | 0 | Not-determined | Genome-fragment | NA | 0     |
| S7_k141_8985                                   | 2361  | No  | NA   | 0  | 4 | Not-determined | Genome-fragment | NA | 0     |
| S7_k141_162996                                 | 1873  | No  | NA   | 0  | 1 | Not-determined | Genome-fragment | NA | 0     |
| S7_k141_163001                                 | 3205  | No  | NA   | 0  | 0 | Not-determined | Genome-fragment | NA | 0     |
| S7_k141_141356                                 | 1119  | No  | NA   | 0  | 1 | Not-determined | Genome-fragment | NA | 0     |
| S7_k141_101158                                 | 1165  | No  | NA   | 0  | 0 | Not-determined | Genome-fragment | NA | 0     |
| S7_k141_40371                                  | 6035  | No  | NA   | 0  | 4 | Not-determined | Genome-fragment | NA | 0     |
| S2_k141_146002                                 | 2061  | No  | NA   | 0  | 3 | Low-quality    | Genome-fragment | NA | 0.76  |
| S6-final-viral-combined_k141_674371[full]      | 2061  | No  | NA   | 0  | 0 | Low-quality    | Genome-fragment | NA | 2.94  |
| S7_k141_90526                                  | 4673  | No  | NA   | 0  | 0 | Not-determined |                 |    |       |



|                                             |       |     |    |      |   |                |                 |                 |       |
|---------------------------------------------|-------|-----|----|------|---|----------------|-----------------|-----------------|-------|
| S7_k141_9477                                | 1494  | No  | NA | 0    | 1 | Not-determined | Genome-fragment | NA              | 0     |
| S7_k141_214115                              | 1221  | No  | NA | 0    | 1 | Not-determined | Genome-fragment | NA              | 0     |
| S7_k141_101420                              | 1370  | No  | NA | 0    | 2 | Not-determined | Genome-fragment | NA              | 0     |
| S7_k141_80255                               | 21021 | No  | NA | 15   | 0 | Medium-quality | Genome-fragment | NA              | 51.45 |
| S7_k141_101462                              | 1080  | No  | NA | 0    | 1 | Not-determined | Genome-fragment | NA              | 0     |
| S8-final-viral-combined_k141_95563  full    | 2064  | No  | NA | 0    | 1 | Low-quality    | Genome-fragment | NA              | 2.33  |
| S7_k141_152307                              | 1209  | No  | NA | 0    | 2 | Not-determined | Genome-fragment | NA              | 0     |
| S7_k141_173295                              | 1413  | No  | NA | 0    | 1 | Not-determined | Genome-fragment | NA              | 0     |
| S7_k141_9561                                | 1702  | No  | NA | 0    | 0 | Not-determined | Genome-fragment | NA              | 0     |
| S7_k141_19571                               | 1500  | No  | NA | 0    | 0 | Not-determined | Genome-fragment | NA              | 0     |
| S11-final-viral-combined_k141_182763  full  | 2064  | No  | NA | 1    | 0 | Low-quality    | Genome-fragment | NA              | 5.39  |
| S7_k141_61082                               | 1811  | No  | NA | 0    | 1 | Not-determined | Genome-fragment | NA              | 0     |
| S7_k141_61086                               | 1337  | No  | NA | 0    | 1 | Not-determined | Genome-fragment | NA              | 0     |
| S7_k141_234852                              | 1450  | No  | NA | 0    | 2 | Not-determined | Genome-fragment | NA              | 0     |
| S7_k141_122462                              | 2355  | No  | NA | 0    | 1 | Not-determined | Genome-fragment | NA              | 0     |
| S7_k141_40790                               | 2051  | No  | NA | 0    | 1 | Not-determined | Genome-fragment | NA              | 0     |
| S7_k141_214163                              | 1761  | No  | NA | 0    | 2 | Not-determined | Genome-fragment | NA              | 0     |
| S7_k141_61112                               | 1247  | No  | NA | 0    | 2 | Not-determined | Genome-fragment | NA              | 0     |
| S2-final-viral-combined_k141_109440  H2gene | 2064  | No  | NA | 0    | 0 | Low-quality    | Genome-fragment | NA              | 1.34  |
| S7_k141_19609                               | 1109  | No  | NA | 0    | 0 | Not-determined | Genome-fragment | NA              | 0     |
| S7_k141_173393                              | 3645  | No  | NA | 0    | 1 | Not-determined | Genome-fragment | NA              | 0     |
| S7_k141_27883                               | 1232  | No  | NA | 0    | 1 | Not-determined | Genome-fragment | NA              | 0     |
| S7_k141_173423                              | 1366  | No  | NA | 0    | 1 | Not-determined | Genome-fragment | NA              | 0     |
| S7_k141_214259                              | 4473  | No  | NA | 0    | 1 | Not-determined | Genome-fragment | NA              | 0     |
| S7_k141_9661                                | 1409  | No  | NA | 0    | 0 | Not-determined | Genome-fragment | NA              | 0     |
| S7_k141_101594                              | 2672  | No  | NA | 0    | 1 | Not-determined | Genome-fragment | NA              | 0     |
| S7_k141_9675                                | 1062  | No  | NA | 0    | 1 | Not-determined | Genome-fragment | NA              | 0     |
| S7_k141_141716                              | 3492  | No  | NA | 0    | 0 | Not-determined | Genome-fragment | NA              | 0     |
| S7_k141_214170                              | 1097  | No  | NA | 0    | 1 | Not-determined | Genome-fragment | NA              | 0     |
| S7_k141_90976                               | 4028  | No  | NA | 0    | 2 | Not-determined | Genome-fragment | NA              | 0     |
| S7_k141_9724                                | 1099  | No  | NA | 0    | 1 | Not-determined | Genome-fragment | NA              | 0     |
| S7_k141_90988                               | 1192  | No  | NA | 0    | 1 | Not-determined | Genome-fragment | NA              | 0     |
| S7-final-viral-combined_k141_140846  full   | 2064  | No  | NA | 0    | 2 | Low-quality    | Genome-fragment | NA              | 0.6   |
| S7_k141_222527                              | 1093  | No  | NA | 0    | 1 | Not-determined | Genome-fragment | NA              | 0     |
| S7_k141_101622                              | 5999  | No  | NA | 0    | 6 | Not-determined | Genome-fragment | NA              | 0     |
| S7_k141_222537                              | 1522  | No  | NA | 0    | 1 | Not-determined | Genome-fragment | NA              | 0     |
| S7_k141_122501                              | 1752  | No  | NA | 0    | 1 | Not-determined | Genome-fragment | NA              | 0     |
| S7_k141_91022                               | 1460  | No  | NA | 0    | 3 | Not-determined | Genome-fragment | NA              | 0     |
| S17-final-viral-combined_k141_97863  full   | 2064  | No  | NA | 1    | 0 | Low-quality    | Genome-fragment | NA              | 1.25  |
| S7_k141_132071                              | 1037  | No  | NA | 0    | 1 | Not-determined | Genome-fragment | NA              | 0     |
| S7_k141_28010                               | 1160  | No  | NA | 0    | 1 | Not-determined | Genome-fragment | NA              | 0     |
| S7_k141_910466                              | 1824  | No  | NA | 0    | 1 | Not-determined | Genome-fragment | NA              | 0     |
| S4-final-viral-combined_k141_14561  full    | 2064  | No  | NA | 0    | 1 | Low-quality    | Genome-fragment | NA              | 5.43  |
| S7_k141_132131                              | 1412  | No  | NA | 0    | 0 | Not-determined | Genome-fragment | NA              | 0     |
| S7-final-viral-combined_k141_102538  full   | 2065  | Yes | NA | 231  | 1 | 1              | Low-quality     | Genome-fragment | 88.81 |
| S7_k141_111468                              | 2087  | No  | NA | 0    | 2 | Not-determined | Genome-fragment | NA              | 0     |
| S7_k141_28037                               | 6072  | No  | NA | 0    | 2 | Not-determined | Genome-fragment | NA              | 0     |
| S7-final-viral-combined_k141_202676  full   | 2065  | No  | NA | 0    | 0 | Low-quality    | Genome-fragment | NA              | 5.29  |
| S7_k141_28069                               | 2317  | No  | NA | 0    | 1 | Not-determined | Genome-fragment | NA              | 0     |
| S7_k141_80472                               | 1169  | No  | NA | 0    | 0 | Not-determined | Genome-fragment | NA              | 0     |
| S7_k141_80518                               | 1801  | No  | NA | 0    | 2 | Not-determined | Genome-fragment | NA              | 0     |
| S8-final-viral-combined_k141_74997  full    | 2065  | Yes | NA | 1120 | 2 | 1              | Low-quality     | Genome-fragment | 2.41  |
| S7_k141_222729                              | 1505  | No  | NA | 0    | 1 | Not-determined | Genome-fragment | NA              | 45.76 |
| S7_k141_101954                              | 2275  | No  | NA | 0    | 2 | Not-determined | Genome-fragment | NA              | 0     |
| S7_k141_19939                               | 2621  | No  | NA | 0    | 2 | Not-determined | Genome-fragment | NA              | 0     |
| S1-final-viral-combined_k141_258255  full   | 2066  | No  | NA | 0    | 0 | Low-quality    | Genome-fragment | NA              | 1.06  |
| S7_k141_111679                              | 1012  | No  | NA | 0    | 1 | Not-determined | Genome-fragment | NA              | 0     |
| S7_k141_243835                              | 1168  | No  | NA | 0    | 1 | Not-determined | Genome-fragment | NA              | 0     |
| S7_k141_222768                              | 1445  | No  | NA | 0    | 1 | Not-determined | Genome-fragment | NA              | 0     |
| S7_k141_142082                              | 1462  | No  | NA | 0    | 1 | Not-determined | Genome-fragment | NA              | 0     |
| S7_k141_222816                              | 1375  | No  | NA | 0    | 2 | Not-determined | Genome-fragment | NA              | 0     |
| S7_k141_142098                              | 1077  | No  | NA | 0    | 1 | Not-determined | Genome-fragment | NA              | 0     |
| S7-final-viral-combined_k141_26930  full    | 2066  | No  | NA | 0    | 1 | Low-quality    | Genome-fragment | NA              | 3.85  |
| S7_k141_91374                               | 2165  | No  | NA | 0    | 2 | Not-determined | Genome-fragment | NA              | 0     |
| S7_k141_91389                               | 1571  | No  | NA | 0    | 2 | Not-determined | Genome-fragment | NA              | 0     |
| S7_k141_152760                              | 1451  | No  | NA | 0    | 2 | Not-determined | Genome-fragment | NA              | 0     |
| S7_k141_132370                              | 3188  | No  | NA | 0    | 3 | Not-determined | Genome-fragment | NA              | 0     |
| S7_k141_142177                              | 1548  | No  | NA | 0    | 2 | Not-determined | Genome-fragment | NA              | 0     |
| S7_k141_152798                              | 3117  | No  | NA | 0    | 1 | Not-determined | Genome-fragment | NA              | 0     |
| S7_k141_111899                              | 1624  | No  | NA | 0    | 0 | Not-determined | Genome-fragment | NA              | 0     |
| S2-final-viral-combined_k141_242371  full   | 2066  | No  | NA | 2    | 0 | Low-quality    | Genome-fragment | NA              | 4.83  |
| S7_k141_132533                              | 1665  | No  | NA | 0    | 1 | Not-determined | Genome-fragment | NA              | 0     |
| S8-final-viral-combined_k141_192242  full   | 2066  | No  | NA | 0    | 2 | Low-quality    | Genome-fragment | NA              | 1.49  |
| S11-final-viral-combined_k141_172211  full  | 2067  | No  | NA | 0    | 2 | Low-quality    | Genome-fragment | NA              | 1.47  |
| S1_k141_39094                               | 2067  | No  | NA | 0    | 0 | Low-quality    | Genome-fragment | NA              | 1.62  |
| S17-final-viral-combined_k141_108192  full  | 2067  | No  | NA | 1    | 0 | Low-quality    | Genome-fragment | NA              | 1.22  |
| S7_k141_10174                               | 2319  | No  | NA | 0    | 0 | Not-determined | Genome-fragment | NA              | 0     |
| S7_k141_232109                              | 1029  | No  | NA | 0    | 0 | Not-determined | Genome-fragment | NA              | 0     |
| S7_k141_133630                              | 3749  | No  | NA | 0    | 1 | Not-determined | Genome-fragment | NA              | 0     |
| S7_k141_81049                               | 1001  | No  | NA | 0    | 2 | Not-determined | Genome-fragment | NA              | 0     |
| S7_k141_20233                               | 3230  | No  | NA | 0    | 1 | Not-determined | Genome-fragment | NA              | 0     |
| S7_k141_20254                               | 4325  | No  | NA | 0    | 2 | Not-determined | Genome-fragment | NA              | 0     |
| S7_k141_132690                              | 1853  | No  | NA | 0    | 1 | Not-determined | Genome-fragment | NA              | 0     |
| S17-k141_22004                              | 2067  | No  | NA | 0    | 0 | Low-quality    | Genome-fragment | NA              | 0.18  |
| S11-final-viral-combined_k141_77459  full   | 2068  | No  | NA | 1    | 0 | Low-quality    | Genome-fragment | NA              | 1.34  |
| S7_k141_28853                               | 1161  | No  | NA | 0    | 1 | Not-determined | Genome-fragment | NA              | 0     |
| S7_k141_232263                              | 1112  | No  | NA | 0    | 2 | Not-determined | Genome-fragment | NA              | 0     |
| S7_k141_91661                               | 1100  | No  | NA | 0    | 1 | Not-determined | Genome-fragment | NA              | 0     |
| S7_k141_244242                              | 1011  | No  | NA | 0    | 2 | Not-determined | Genome-fragment | NA              | 0     |
| S7_k141_81221                               | 1756  | No  | NA | 0    | 2 | Not-determined | Genome-fragment | NA              | 0     |
| S7_k141_29088                               | 2328  | No  | NA | 0    | 0 | Not-determined | Genome-fragment | NA              | 0     |
| S7_k141_244337                              | 1406  | No  | NA | 0    | 3 | Not-determined | Genome-fragment | NA              | 0     |
| S7_k141_142746                              | 1023  | No  | NA | 0    | 0 | Not-determined | Genome-fragment | NA              | 0     |
| S1_k141_142129                              | 2068  | No  | NA | 0    | 0 | Low-quality    | Genome-fragment | NA              | 0.91  |
| S7_k141_232403                              | 5150  | No  | NA | 0    | 0 | Low-quality    | Genome-fragment | NA              | 2.65  |
| S17-final-viral-combined_k141_53572  full   | 2068  | No  | NA | 0    | 0 | Low-quality    | Genome-fragment | NA              | 0     |
| S7_k141_244373                              | 8321  | No  | NA | 0    | 6 | Not-determined | Genome-fragment | NA              | 0     |
| S7_k141_232421                              | 1357  | No  | NA | 0    | 2 | Not-determined | Genome-fragment | NA              | 0     |
| S7_k141_232432                              | 2049  | No  | NA | 0    | 2 | Not-determined | Genome-fragment | NA              | 0     |
| S7_k141_244402                              | 1252  | No  | NA | 0    | 1 | Not-determined | Genome-fragment | NA              | 0     |
| S7_k141_81467                               | 4167  | No  | NA | 0    | 2 | Not-determined | Genome-fragment | NA              | 0     |
| S7_k141_142826                              | 3910  | No  | NA | 0    | 1 | Not-determined | Genome-fragment | NA              | 0     |
| S2-final-viral-combined_k141_42662  full    | 2068  | No  | NA | 0    | 0 | Low-quality    | Genome-fragment | NA              | 2.79  |
| S7_k141_29370                               | 1207  | No  | NA | 0    | 0 | Not-determined | Genome-fragment | NA              | 0     |
| S7_k141_29373                               | 1470  | No  | NA | 0    | 1 | Not-determined | Genome-fragment | NA              | 0     |
| S7_k141_244425                              | 72371 | No  | NA | 7    | 0 | Medium-quality | Genome-fragment | NA              | 77.69 |
| S7_k141_29389                               | 2183  | No  | NA | 0    | 0 | Not-determined | Genome-fragment | NA              | 0     |
| S7_k141_244455                              | 1037  | No  | NA | 0    | 0 | Not-determined | Genome-fragment | NA              | 0     |
| S2_k141_14015                               | 2068  | No  | NA | 0    | 1 | Low-quality    | Genome-fragment | NA              | 1.26  |
| S7_k141_142885                              | 1249  | No  | NA | 0    | 2 | Not-determined | Genome-fragment | NA              | 0     |
| S7_k141_142895                              | 3104  | No  | NA | 0    | 1 | Not-determined | Genome-fragment | NA              | 0     |
| S7_k141_142905                              | 1254  | No  | NA | 0    | 0 | Not-determined | Genome-fragment | NA              | 0     |
| S7_k141_244487                              | 4342  | No  | NA | 0    | 1 | Not-determined | Genome-fragment | NA              | 0     |
| S7_k141_81559                               | 4221  | No  | NA | 0    | 1 | Not-determined | Genome-fragment | NA              | 0     |
| S8-final-viral-combined_k141_43065  full    | 2068  | No  | NA | 0    | 1 | Low-quality    | Genome-fragment | NA              | 4.73  |
| S7_k141_232842                              | 1391  | No  | NA | 0    | 0 | Not-determined | Genome-fragment | NA              | 0     |
| S7_k141_232856                              | 1334  | No  | NA | 0    | 1 | Not-determined | Genome-fragment | NA              | 0     |
| S8-final-viral-combined_k141_80309  full    | 2068  | No  | NA | 3    | 0 | Low-quality    | Genome-fragment | NA              | 3.41  |
| S1-final-viral-combined_k141_100830  full   | 2069  | No  | NA | 1    | 0 | Low-quality    | Genome-fragment | NA              | 5.31  |
| S17-final-viral-combined_k141_4582  full    | 2069  | No  | NA | 0    | 0 | Low-quality    | Genome-fragment | NA              | 3.87  |
| S7_k141_29716                               | 5328  | No  | NA | 0    | 0 | Not-determined | Genome-fragment | NA              | 0     |
| S7_k141_244713                              | 1577  | No  | NA | 0    | 0 | Not-determined | Genome-fragment | NA              | 0     |
| S17-final-viral-combined_k141_84255  full   | 2069  | No  | NA | 0    | 1 | Low-quality    | Genome-fragment | NA              | 0.94  |
| S4-final-viral-combined_k141_11206  full    | 2069  | No  | NA | 0    | 2 | Low-quality    | Genome-fragment | NA              | 2.81  |
| S7_k141_29587                               | 4421  | No  | NA | 0    | 3 | Not-determined | Genome-fragment | NA              | 0     |
| S7_k141_244773                              | 11873 | No  | NA | 0    | 2 | Not-determined | Genome-fragment | NA              | 0     |
| S11-final-viral-combined_k141_255543  full  | 2070  | No  | NA | 1    | 0 | Low-quality    | Genome-fragment | NA              | 5.58  |
| S7_k141_244797                              | 3087  | No  | NA | 0    | 1 | Not-determined | Genome-fragment | NA              | 0     |
| S7_k141_30091                               | 1322  | No  | NA | 0    | 1 | Not-determined | Genome-fragment | NA              | 0     |
| S1-final-viral-combined_k141_329293  full   | 2070  | No  | NA | 0    | 2 | Low-quality    | Genome-fragment | NA              | 2.6   |
| S7_k141_30105                               | 1040  | No  | NA | 0    | 0 | Not-determined | Genome-fragment | NA              | 0     |
| S7_k141_244821                              | 3122  | No  | NA | 0    | 0 | Not-determined | Genome-fragment | NA              | 0     |
| S7_k141_244866                              | 34147 | No  | NA | 12   | 0 | Complete       | High-quality    | Genome-fragment | 100   |
| S7-final-viral-combined_k141_209274  full   | 2070  | No  | NA | 1    | 0 | Low-quality    | Genome-fragment | NA              | 1.96  |
| S7_k141_30362                               | 1153  | No  | NA | 0    | 1 | Not-determined | Genome-fragment | NA              | 0     |
| S7_k141_244882                              | 3151  | No  | NA | 0    | 0 | Not-determined | Genome-fragment | NA              | 0     |
| S7_k141_30446                               | 4231  | No  | NA | 0    | 3 | Not-determined | Genome-fragment | NA              | 0     |
| S7_k141_244943                              | 1428  | No  | NA | 0    | 1 | Not-determined | Genome-fragment | NA              | 0     |
| S7_k141_244974                              | 3932  | No  | NA | 0    | 0 | Not-determined | Genome-fragment | NA              | 0     |
| S12_k141_225066                             | 2070  | No  | NA | 0    | 0 | Low-quality    | Genome-fragment | NA              | 3.35  |
| S2-final-viral-combined_k141_155924  full   | 2070  | No  | NA | 2    | 0 | Low-quality    | Genome-fragment | NA              | 4.57  |
| S17-final-viral-combined_k141_167045  full  | 1022  | No  | NA | 0    | 1 | Not-determined | Genome-fragment | NA              | 0     |
| S17-final-viral-combined_k141_157468  full  | 23284 | No  | NA | 3    | 1 | High-quality   | High-quality    | Genome-fragment | 100   |
| S2-final-viral-combined_k141_162460  full   | 2070  | No  | NA | 2    | 0 | Low-quality    | Genome-fragment | NA              | 4.31  |
| S17-final-viral-combined_k141_138473  full  | 2732  | No  | NA | 0    | 2 | Not-determined | Genome-fragment | NA              | 0     |
| S4-final-viral-combined_k141_1673           |       |     |    |      |   |                |                 |                 |       |



|                                      |          |       |     |       |    |    |                |                 |       |       |
|--------------------------------------|----------|-------|-----|-------|----|----|----------------|-----------------|-------|-------|
| S6-final-viral-combined_k141_70921   | [full]   | 2072  | No  | NA    | 0  | 1  | Low-quality    | Genome-fragment | 1.2   | 0     |
| S17-final-viral-combined_k141_66791  | [full]   | 2420  | No  | NA    | 0  | 0  | Not-determined | Genome-fragment | NA    | 0     |
| S17-final-viral-combined_k141_88970  | [full]   | 1615  | No  | NA    | 0  | 0  | Not-determined | Genome-fragment | NA    | 0     |
| S17-final-viral-combined_k141_66751  | [full]   | 1537  | No  | NA    | 0  | 2  | Not-determined | Genome-fragment | NA    | 0     |
| S17-final-viral-combined_k141_166751 | [full]   | 1393  | No  | NA    | 0  | 0  | Not-determined | Genome-fragment | NA    | 0     |
| S1-final-viral-combined_k141_135951  | [full]   | 2073  | No  | NA    | 3  | 0  | Low-quality    | Genome-fragment | 4.77  | 0     |
| S17-final-viral-combined_k141_88875  | [full]   | 2073  | No  | NA    | 1  | 0  | Low-quality    | Genome-fragment | 5.7   | 0     |
| S17-final-viral-combined_k141_189051 | [full]   | 1203  | No  | NA    | 0  | 1  | Not-determined | Genome-fragment | NA    | 0     |
| S11-final-viral-combined_k141_231430 | [full]   | 2074  | No  | NA    | 0  | 0  | Low-quality    | Genome-fragment | 3.21  | 0     |
| S17-final-viral-combined_k141_233470 | [full]   | 1131  | No  | NA    | 0  | 0  | Not-determined | Genome-fragment | NA    | 0     |
| S17-final-viral-combined_k141_111245 | [full]   | 1475  | No  | NA    | 0  | 1  | Not-determined | Genome-fragment | NA    | 0     |
| S17-final-viral-combined_k141_222392 | [full]   | 1319  | No  | NA    | 0  | 0  | Not-determined | Genome-fragment | NA    | 0     |
| S3_k141_67785                        |          | 2074  | No  | NA    | 0  | 2  | Low-quality    | Genome-fragment | 3.77  | 0     |
| S17-final-viral-combined_k141_110449 | [full]   | 2074  | No  | NA    | 0  | 0  | Low-quality    | Genome-fragment | 2.03  | 0     |
| S17-final-viral-combined_k141_112318 | [full]   | 2074  | No  | NA    | 1  | 0  | Low-quality    | Genome-fragment | 4.81  | 0     |
| S12-final-viral-combined_k141_113038 | [full]   | 2074  | No  | NA    | 2  | 0  | Low-quality    | Genome-fragment | 0.86  | 0     |
| S11-final-viral-combined_k141_188255 | [full]   | 2075  | No  | NA    | 0  | 2  | Low-quality    | Genome-fragment | 1.95  | 0     |
| S12-final-viral-combined_k141_144527 | [full]   | 2075  | No  | NA    | 1  | 0  | Low-quality    | Genome-fragment | 1.86  | 0     |
| S12-final-viral-combined_k141_165242 | [full]   | 2075  | No  | NA    | 0  | 0  | Low-quality    | Genome-fragment | 2.29  | 0     |
| S12-final-viral-combined_k141_283179 | [full]   | 2075  | No  | NA    | 0  | 2  | Low-quality    | Genome-fragment | 2.39  | 0     |
| S17-final-viral-combined_k141_122402 | [full]   | 13282 | No  | NA    | 0  | 0  | Not-determined | Genome-fragment | NA    | 0     |
| S17-final-viral-combined_k141_109    | [full]   | 1536  | No  | NA    | 0  | 0  | Not-determined | Genome-fragment | NA    | 0     |
| S12_k141_191561                      |          | 2075  | No  | NA    | 1  | 0  | Low-quality    | Genome-fragment | 0.96  | 0     |
| S17-final-viral-combined_k141_255781 | [full]   | 5460  | No  | NA    | 0  | 3  | Not-determined | Genome-fragment | NA    | 0     |
| S8-final-viral-combined_k141_103247  | [full]   | 2075  | No  | NA    | 0  | 0  | Low-quality    | Genome-fragment | 2.39  | 0     |
| S17-final-viral-combined_k141_156800 | [full]   | 2054  | No  | NA    | 0  | 1  | Not-determined | Genome-fragment | NA    | 0     |
| S17-final-viral-combined_k141_222459 | [full]   | 2070  | No  | NA    | 0  | 1  | Not-determined | Genome-fragment | NA    | 0     |
| S17-final-viral-combined_k141_189132 | [full]   | 2556  | No  | NA    | 0  | 0  | Not-determined | Genome-fragment | NA    | 0     |
| S17-final-viral-combined_k141_255794 | [full]   | 2113  | No  | NA    | 0  | 0  | Not-determined | Genome-fragment | NA    | 0     |
| S17-final-viral-combined_k141_258272 | [H2gene] | 2076  | No  | NA    | 1  | 0  | Low-quality    | Genome-fragment | 3.27  | 0     |
| S17-final-viral-combined_k141_189137 | [full]   | 3061  | No  | NA    | 0  | 1  | Not-determined | Genome-fragment | NA    | 0     |
| S17-final-viral-combined_k141_189137 | [full]   | 2784  | No  | NA    | 3  | 1  | Not-determined | Genome-fragment | NA    | 0     |
| S17-final-viral-combined_k141_55728  | [full]   | 1114  | No  | NA    | 0  | 0  | Not-determined | Genome-fragment | NA    | 0     |
| S4_k141_148264                       |          | 2076  | No  | NA    | 1  | 0  | Low-quality    | Genome-fragment | 6.1   | 0     |
| S17-final-viral-combined_k141_200335 | [full]   | 2018  | No  | NA    | 0  | 1  | Not-determined | Genome-fragment | NA    | 0     |
| S8-final-viral-combined_k141_69416   | [full]   | 2077  | No  | NA    | 0  | 1  | Low-quality    | Genome-fragment | 2.04  | 0     |
| S17-k141_212155                      |          | 2077  | No  | NA    | 2  | 0  | Low-quality    | Genome-fragment | 5.2   | 0     |
| S17-final-viral-combined_k141_211369 | [full]   | 1098  | No  | NA    | 0  | 1  | Not-determined | Genome-fragment | NA    | 0     |
| S17-final-viral-combined_k141_221488 | [full]   | 4407  | No  | NA    | 0  | 2  | Not-determined | Genome-fragment | NA    | 0     |
| S17-final-viral-combined_k141_122443 | [full]   | 15181 | No  | NA    | 0  | 8  | Not-determined | Genome-fragment | NA    | 0     |
| S17-final-viral-combined_k141_222503 | [full]   | 2220  | No  | NA    | 0  | 1  | Not-determined | Genome-fragment | NA    | 0     |
| S12-final-viral-combined_k141_83621  | [full]   | 2077  | No  | NA    | 0  | 0  | Low-quality    | Genome-fragment | 5.39  | 0     |
| S8-final-viral-combined_k141_22554   | [full]   | 2077  | No  | NA    | 3  | 0  | Low-quality    | Genome-fragment | 5.38  | 0     |
| S17-final-viral-combined_k141_144770 | [full]   | 2687  | No  | NA    | 0  | 0  | Not-determined | Genome-fragment | NA    | 0     |
| S17-final-viral-combined_k141_155760 | [full]   | 2692  | No  | NA    | 0  | 0  | Not-determined | Genome-fragment | NA    | 0     |
| S17-final-viral-combined_k141_111388 | [full]   | 3832  | No  | NA    | 0  | 1  | Not-determined | Genome-fragment | NA    | 0     |
| S11-final-viral-combined_k141_127292 | [full]   | 2078  | No  | NA    | 1  | 0  | Low-quality    | Genome-fragment | 36.48 | 0     |
| S17-final-viral-combined_k141_111283 | [full]   | 3157  | No  | NA    | 0  | 1  | Not-determined | Genome-fragment | NA    | 0     |
| S17-final-viral-combined_k141_89041  | [full]   | 6710  | No  | NA    | 0  | 1  | Not-determined | Genome-fragment | NA    | 0     |
| S17-final-viral-combined_k141_178000 | [full]   | 2091  | No  | NA    | 0  | 2  | Not-determined | Genome-fragment | NA    | 0     |
| S11_k141_326853                      |          | 2078  | No  | NA    | 1  | 0  | Low-quality    | Genome-fragment | 1.63  | 0     |
| S4-final-viral-combined_k141_126897  | [H2gene] | 2078  | Yes | 957   | 1  | 1  | Low-quality    | Genome-fragment | 18.62 | 53.95 |
| S17-final-viral-combined_k141_211423 | [full]   | 1121  | No  | NA    | 0  | 2  | Not-determined | Genome-fragment | NA    | 0     |
| S17-final-viral-combined_k141_255887 | [full]   | 4442  | No  | NA    | 0  | 5  | Not-determined | Genome-fragment | NA    | 0     |
| S5-final-viral-combined_k141_189688  | [full]   | 2079  | No  | NA    | 0  | 2  | Low-quality    | Genome-fragment | 2.47  | 0     |
| S17-final-viral-combined_k141_78158  | [full]   | 2339  | No  | NA    | 0  | 2  | Not-determined | Genome-fragment | NA    | 0     |
| S5-final-viral-combined_k141_157969  | [full]   | 2079  | No  | NA    | 0  | 0  | Low-quality    | Genome-fragment | 1.17  | 0     |
| S17-final-viral-combined_k141_111403 | [full]   | 1289  | No  | NA    | 0  | 0  | Not-determined | Genome-fragment | NA    | 0     |
| S17-final-viral-combined_k141_111405 | [full]   | 2000  | No  | NA    | 0  | 3  | Not-determined | Genome-fragment | NA    | 0     |
| S17-final-viral-combined_k141_155799 | [full]   | 1228  | No  | NA    | 0  | 1  | Not-determined | Genome-fragment | NA    | 0     |
| S17-final-viral-combined_k141_200386 | [full]   | 3041  | No  | NA    | 0  | 1  | Not-determined | Genome-fragment | NA    | 0     |
| S17-final-viral-combined_k141_118406 | [full]   | 2079  | No  | NA    | 0  | 0  | Low-quality    | Genome-fragment | 4.3   | 0     |
| S17-k141_223960                      |          | 2079  | No  | NA    | 1  | 0  | Low-quality    | Genome-fragment | 3.77  | 0     |
| S17-final-viral-combined_k141_66969  | [full]   | 4667  | No  | NA    | 0  | 2  | Not-determined | Genome-fragment | NA    | 0     |
| S2-final-viral-combined_k141_157765  | [full]   | 2079  | No  | NA    | 0  | 0  | Low-quality    | Genome-fragment | NA    | 0     |
| S17-final-viral-combined_k141_89129  | [full]   | 3470  | No  | NA    | 0  | 0  | Not-determined | Genome-fragment | NA    | 0     |
| S17-final-viral-combined_k141_233648 | [full]   | 1226  | No  | NA    | 0  | 0  | Not-determined | Genome-fragment | NA    | 0     |
| S11-final-viral-combined_k141_92779  | [full]   | 2080  | No  | NA    | 0  | 0  | Low-quality    | Genome-fragment | 3.09  | 0     |
| S1-final-viral-combined_k141_150289  | [full]   | 2080  | No  | NA    | 0  | 0  | Not-determined | Genome-fragment | 1.33  | 0     |
| S17-final-viral-combined_k141_178014 | [full]   | 5132  | No  | NA    | 0  | 0  | Not-determined | Genome-fragment | NA    | 0     |
| S5-final-viral-combined_k141_4934    | [full]   | 2080  | No  | NA    | 1  | 0  | Low-quality    | Genome-fragment | 2.47  | 0     |
| S5-final-viral-combined_k141_111777  | [full]   | 2080  | No  | NA    | 0  | 0  | Not-determined | Genome-fragment | 3.43  | 0     |
| S17-final-viral-combined_k141_67037  | [full]   | 2014  | No  | NA    | 0  | 0  | Not-determined | Genome-fragment | NA    | 0     |
| S5_k141_191358                       |          | 2080  | No  | NA    | 2  | 0  | Low-quality    | Genome-fragment | 5.05  | 0     |
| S17-final-viral-combined_k141_233705 | [full]   | 1195  | No  | NA    | 0  | 0  | Not-determined | Genome-fragment | NA    | 0     |
| S17-final-viral-combined_k141_67056  | [full]   | 3954  | No  | NA    | 0  | 2  | Not-determined | Genome-fragment | NA    | 0     |
| S17-final-viral-combined_k141_244820 | [full]   | 2405  | No  | NA    | 0  | 2  | Not-determined | Genome-fragment | NA    | 0     |
| S17-final-viral-combined_k141_111461 | [full]   | 2932  | No  | NA    | 0  | 2  | Not-determined | Genome-fragment | NA    | 0     |
| S17-final-viral-combined_k141_3031   | [full]   | 2182  | No  | NA    | 0  | 1  | Not-determined | Genome-fragment | NA    | 0     |
| S17-final-viral-combined_k141_244832 | [full]   | 1580  | No  | NA    | 0  | 2  | Not-determined | Genome-fragment | NA    | 0     |
| S17-final-viral-combined_k141_22517  | [full]   | 1796  | No  | NA    | 0  | 0  | Not-determined | Genome-fragment | NA    | 0     |
| S17-final-viral-combined_k141_231742 | [full]   | 6322  | No  | NA    | 0  | 1  | Not-determined | Genome-fragment | NA    | 0     |
| S17-final-viral-combined_k141_222661 | [full]   | 2731  | No  | NA    | 0  | 3  | Not-determined | Genome-fragment | NA    | 0     |
| S12_k141_381437                      |          | 2080  | No  | NA    | 1  | 0  | Low-quality    | Genome-fragment | 1.12  | 0     |
| S4-final-viral-combined_k141_155137  | [full]   | 2080  | No  | NA    | 0  | 2  | Low-quality    | Genome-fragment | 1.43  | 0     |
| S6-final-viral-combined_k141_70983   | [full]   | 2080  | No  | NA    | 0  | 2  | Low-quality    | Genome-fragment | 1.08  | 0     |
| S17-final-viral-combined_k141_89193  | [full]   | 1993  | No  | NA    | 0  | 0  | Not-determined | Genome-fragment | NA    | 0     |
| S17-final-viral-combined_k141_144935 | [full]   | 1372  | No  | NA    | 0  | 1  | Not-determined | Genome-fragment | NA    | 0     |
| S17-final-viral-combined_k141_3501   | [full]   | 2529  | No  | NA    | 0  | 0  | Not-determined | Genome-fragment | NA    | 0     |
| S8-final-viral-combined_k141_241635  | [full]   | 2080  | No  | NA    | 0  | 0  | Low-quality    | Genome-fragment | 3.19  | 0     |
| S11-final-viral-combined_k141_253447 | [full]   | 2081  | No  | NA    | 2  | 0  | Low-quality    | Genome-fragment | 2.43  | 0     |
| S17-final-viral-combined_k141_155873 | [full]   | 3382  | No  | NA    | 0  | 0  | Not-determined | Genome-fragment | NA    | 0     |
| S17-final-viral-combined_k141_78314  | [full]   | 2650  | No  | NA    | 0  | 0  | Not-determined | Genome-fragment | NA    | 0     |
| S11-final-viral-combined_k141_17111  | [H2gene] | 2081  | No  | NA    | 2  | 0  | Low-quality    | Genome-fragment | 4.13  | 0     |
| S17-final-viral-combined_k141_211684 | [full]   | 1569  | No  | NA    | 0  | 1  | Not-determined | Genome-fragment | NA    | 0     |
| S17-final-viral-combined_k141_11387  | [full]   | 1117  | No  | NA    | 0  | 1  | Not-determined | Genome-fragment | NA    | 0     |
| S17-final-viral-combined_k141_122686 | [full]   | 4448  | No  | NA    | 0  | 2  | Not-determined | Genome-fragment | NA    | 0     |
| S1-final-viral-combined_k141_138794  | [full]   | 2081  | No  | NA    | 0  | 0  | Low-quality    | Genome-fragment | 1.99  | 0     |
| S17-final-viral-combined_k141_231761 | [full]   | 44873 | Yes | 36206 | 0  | 1  | Medium-quality | Genome-fragment | 83.44 | 19.31 |
| S17-final-viral-combined_k141_111554 | [full]   | 1057  | No  | NA    | 0  | 1  | Not-determined | Genome-fragment | NA    | 0     |
| S17-final-viral-combined_k141_122637 | [full]   | 5798  | No  | NA    | 0  | 3  | Not-determined | Genome-fragment | NA    | 0     |
| S3-final-viral-combined_k141_87036   | [full]   | 2081  | No  | NA    | 0  | 1  | Low-quality    | Genome-fragment | 1.71  | 0     |
| S17-final-viral-combined_k141_111561 | [full]   | 1558  | No  | NA    | 0  | 1  | Not-determined | Genome-fragment | NA    | 0     |
| S17-final-viral-combined_k141_111574 | [full]   | 2791  | No  | NA    | 0  | 2  | Not-determined | Genome-fragment | NA    | 0     |
| S17-final-viral-combined_k141_111683 | [full]   | 6768  | No  | NA    | 0  | 3  | Not-determined | Genome-fragment | NA    | 0     |
| S17-final-viral-combined_k141_89247  | [full]   | 3254  | No  | NA    | 0  | 1  | Not-determined | Genome-fragment | NA    | 0     |
| S17-final-viral-combined_k141_213732 | [full]   | 2081  | No  | NA    | 0  | 0  | Low-quality    | Genome-fragment | 5.57  | 0     |
| S17-final-viral-combined_k141_140739 | [full]   | 2081  | No  | NA    | 1  | 0  | Low-quality    | Genome-fragment | 5.3   | 0     |
| S17-final-viral-combined_k141_157241 | [full]   | 2081  | No  | NA    | 0  | 0  | Low-quality    | Genome-fragment | 5.87  | 0     |
| S12_k141_87546                       |          | 2081  | No  | NA    | 0  | 0  | Low-quality    | Genome-fragment | 1.12  | 0     |
| S12_k141_278645                      |          | 2081  | No  | NA    | 0  | 0  | Low-quality    | Genome-fragment | 0.52  | 0     |
| S6-final-viral-combined_k141_98757   | [full]   | 2081  | No  | NA    | 0  | 2  | Not-determined | Genome-fragment | NA    | 0     |
| S17-final-viral-combined_k141_22612  | [full]   | 1078  | No  | NA    | 0  | 2  | Not-determined | Genome-fragment | NA    | 0     |
| S8-final-viral-combined_k141_172972  | [full]   | 2081  | No  | NA    | 0  | 1  | Low-quality    | Genome-fragment | 2.22  | 0     |
| S17-final-viral-combined_k141_221788 | [full]   | 1905  | No  | NA    | 0  | 2  | Not-determined | Genome-fragment | NA    | 0     |
| S17-final-viral-combined_k141_133731 | [full]   | 7975  | No  | NA    | 0  | 0  | Not-determined | Genome-fragment | NA    | 0     |
| S17-final-viral-combined_k141_67211  | [full]   | 3470  | No  | NA    | 0  | 0  | Not-determined | Genome-fragment | NA    | 0     |
| S1-final-viral-combined_k141_359141  | [full]   | 2082  | No  | NA    | 1  | 0  | Low-quality    | Genome-fragment | 5.08  | 0     |
| S1-final-viral-combined_k141_81584   | [full]   | 2082  | No  | NA    | 0  | 0  | Low-quality    | Genome-fragment | 5.71  | 0     |
| S17-final-viral-combined_k141_155958 | [full]   | 1126  | No  | NA    | 0  | 2  | Not-determined | Genome-fragment | NA    | 0     |
| S17-final-viral-combined_k141_301    | [full]   | 2082  | No  | NA    | 0  | 2  | Low-quality    | Genome-fragment | 0.59  | 0     |
| S17-final-viral-combined_k141_200286 | [full]   | 1528  | No  | NA    | 0  | 0  | Not-determined | Genome-fragment | NA    | 0     |
| S17-final-viral-combined_k141_182496 | [full]   | 2082  | No  | NA    | 0  | 1  | Low-quality    | Genome-fragment | 1.46  | 0     |
| S17-final-viral-combined_k141_33102  | [full]   | 2082  | No  | NA    | 4  | 0  | Low-quality    | Genome-fragment | 4.35  | 0     |
| S2-final-viral-combined_k141_94479   | [full]   | 2082  | No  | NA    | 0  | 1  | Low-quality    | Genome-fragment | 1.47  | 0     |
| S17-final-viral-combined_k141_155965 | [full]   | 3064  | No  | NA    | 0  | 1  | Not-determined | Genome-fragment | NA    | 0     |
| S17-final-viral-combined_k141_160606 | [full]   | 96019 | Yes | 79780 | 29 | 13 | High-quality   | High-quality    | 100   | 16.91 |
| S2-final-viral-combined_k141_107976  | [full]   | 2082  | Yes | 326   | 1  | 1  | Low-quality    | Genome-fragment | 0.38  | 84.34 |
| S8_k141_183187                       |          | 2082  | No  | NA    | 0  | 1  | Low-quality    | Genome-fragment |       |       |



|                                      |          |        |    |    |   |    |                |                 |    |       |   |
|--------------------------------------|----------|--------|----|----|---|----|----------------|-----------------|----|-------|---|
| S17-final-viral-combined_k141_89365  | [full]   | 5258   | No | NA | 0 | 0  | Not-determined | Genome-fragment | NA | 0     | 0 |
| S17-final-viral-combined_k141_87414  | [full]   | 3316   | No | NA | 0 | 1  | Not-determined | Genome-fragment | NA | 0     | 0 |
| S12-final-viral-combined_k141_323654 | [full]   | 2086   | No | NA | 1 | 0  | Low-quality    | Genome-fragment | NA | 5.16  | 0 |
| S17-final-viral-combined_k141_11542  | [full]   | 3267   | No | NA | 0 | 1  | Not-determined | Genome-fragment | NA | 0     | 0 |
| S2-final-viral-combined_k141_188342  | [full]   | 2086   | No | NA | 1 | 0  | Low-quality    | Genome-fragment | NA | 5.52  | 0 |
| S2-final-viral-combined_k141_220021  | [full]   | 2086   | No | NA | 0 | 0  | Low-quality    | Genome-fragment | NA | 4.44  | 0 |
| S11-final-viral-combined_k141_256240 | [full]   | 2087   | No | NA | 0 | 0  | Low-quality    | Genome-fragment | NA | 2.44  | 0 |
| S14-final-viral-combined_k141_259646 | [full]   | 2087   | No | NA | 0 | 2  | Low-quality    | Genome-fragment | NA | 0.53  | 0 |
| S17-final-viral-combined_k141_200730 | [full]   | 1479   | No | NA | 0 | 1  | Not-determined | Genome-fragment | NA | 0     | 0 |
| S3_k141_61578                        |          | 2087   | No | NA | 0 | 0  | Low-quality    | Genome-fragment | NA | 0.96  | 0 |
| S2-final-viral-combined_k141_176851  | [full]   | 2087   | No | NA | 0 | 1  | Low-quality    | Genome-fragment | NA | 0.74  | 0 |
| S17-final-viral-combined_k141_67414  | [full]   | 3250   | No | NA | 0 | 4  | Not-determined | Genome-fragment | NA | 0     | 0 |
| S17-final-viral-combined_k141_122923 | [full]   | 1047   | No | NA | 0 | 1  | Not-determined | Genome-fragment | NA | 0     | 0 |
| S17-final-viral-combined_k141_145156 | [full]   | 30402  | No | NA | 0 | 14 | Not-determined | Genome-fragment | NA | 0     | 0 |
| S17-final-viral-combined_k141_16061  | [full]   | 115134 | No | NA | 3 | 61 | High-quality   | High-quality    | NA | 100   | 0 |
| S17-final-viral-combined_k141_335781 | [full]   | 11519  | No | NA | 0 | 0  | Not-determined | Genome-fragment | NA | 0     | 0 |
| S17-final-viral-combined_k141_145166 | [full]   | 3534   | No | NA | 0 | 2  | Not-determined | Genome-fragment | NA | 0     | 0 |
| S7_k141_190754                       |          | 2087   | No | NA | 1 | 0  | Low-quality    | Genome-fragment | NA | 4.34  | 0 |
| S17-final-viral-combined_k141_211838 | [full]   | 1901   | No | NA | 0 | 2  | Not-determined | Genome-fragment | NA | 0     | 0 |
| S17-final-viral-combined_k141_200796 | [full]   | 1088   | No | NA | 0 | 1  | Not-determined | Genome-fragment | NA | 0     | 0 |
| S12_k141_139745                      |          | 2087   | No | NA | 1 | 0  | Low-quality    | Genome-fragment | NA | 3.31  | 0 |
| S17-final-viral-combined_k141_256281 | [full]   | 1221   | No | NA | 0 | 2  | Not-determined | Genome-fragment | NA | 0     | 0 |
| S17-final-viral-combined_k141_211885 | [full]   | 2248   | No | NA | 0 | 1  | Not-determined | Genome-fragment | NA | 0     | 0 |
| S17-final-viral-combined_k141_100509 | [full]   | 1376   | No | NA | 0 | 0  | Not-determined | Genome-fragment | NA | 0     | 0 |
| S17-final-viral-combined_k141_178250 | [full]   | 2214   | No | NA | 0 | 1  | Not-determined | Genome-fragment | NA | 0     | 0 |
| S11-final-viral-combined_k141_315404 | [full]   | 2088   | No | NA | 0 | 1  | Low-quality    | Genome-fragment | NA | 4.78  | 0 |
| S17-final-viral-combined_k141_660    | [full]   | 3637   | No | NA | 0 | 4  | Not-determined | Genome-fragment | NA | 0     | 0 |
| S14-final-viral-combined_k141_209600 | [full]   | 2088   | No | NA | 0 | 1  | Low-quality    | Genome-fragment | NA | 0.98  | 0 |
| S17-final-viral-combined_k141_20836  | [full]   | 4307   | No | NA | 0 | 4  | Not-determined | Genome-fragment | NA | 0     | 0 |
| S17-final-viral-combined_k141_156175 | [full]   | 1454   | No | NA | 0 | 0  | Not-determined | Genome-fragment | NA | 0     | 0 |
| S5-final-viral-combined_k141_1853    | [full]   | 2088   | No | NA | 0 | 2  | Low-quality    | Genome-fragment | NA | 4.21  | 0 |
| S7-final-viral-combined_k141_61326   | [full]   | 2088   | No | NA | 0 | 0  | Low-quality    | Genome-fragment | NA | 3.38  | 0 |
| S2-final-viral-combined_k141_1282    | [full]   | 2088   | No | NA | 0 | 2  | Low-quality    | Genome-fragment | NA | 3.27  | 0 |
| S8-final-viral-combined_k141_203500  | [full]   | 2088   | No | NA | 0 | 0  | Low-quality    | Genome-fragment | NA | 1.96  | 0 |
| S11_k141_10774                       |          | 2089   | No | NA | 0 | 0  | Low-quality    | Genome-fragment | NA | 3.12  | 0 |
| S17-final-viral-combined_k141_56142  | [full]   | 7487   | No | NA | 2 | 2  | Not-determined | Genome-fragment | NA | 0     | 0 |
| S11-final-viral-combined_k141_35313  | [full]   | 2089   | No | NA | 2 | 0  | Low-quality    | Genome-fragment | NA | 4.8   | 0 |
| S17-final-viral-combined_k141_189511 | [full]   | 2712   | No | NA | 0 | 0  | Not-determined | Genome-fragment | NA | 0     | 0 |
| S1-final-viral-combined_k141_172876  | [full]   | 2089   | No | NA | 0 | 0  | Low-quality    | Genome-fragment | NA | 41.28 | 0 |
| S17-final-viral-combined_k141_1178   | [full]   | 20369  | No | NA | 3 | 10 | Not-determined | Genome-fragment | NA | 0     | 0 |
| S17-final-viral-combined_k141_67538  | [full]   | 2756   | No | NA | 0 | 2  | Not-determined | Genome-fragment | NA | 0     | 0 |
| S17-final-viral-combined_k141_3400   | [full]   | 2711   | No | NA | 0 | 2  | Not-determined | Genome-fragment | NA | 0     | 0 |
| S17-final-viral-combined_k141_89462  | [full]   | 1218   | No | NA | 0 | 2  | Not-determined | Genome-fragment | NA | 0     | 0 |
| S17-final-viral-combined_k141_67562  | [full]   | 1178   | No | NA | 0 | 1  | Not-determined | Genome-fragment | NA | 0     | 0 |
| S17-final-viral-combined_k141_185540 | [full]   | 3160   | No | NA | 0 | 3  | Not-determined | Genome-fragment | NA | 0     | 0 |
| S7-final-viral-combined_k141_165781  | [full]   | 2089   | No | NA | 0 | 0  | Low-quality    | Genome-fragment | NA | 4.11  | 0 |
| S17-final-viral-combined_k141_200874 | [full]   | 4456   | No | NA | 0 | 1  | Not-determined | Genome-fragment | NA | 0     | 0 |
| S17-final-viral-combined_k141_241071 | [full]   | 2089   | No | NA | 0 | 0  | Low-quality    | Genome-fragment | NA | 4.93  | 0 |
| S4-final-viral-combined_k141_46518   | [full]   | 2089   | No | NA | 0 | 0  | Low-quality    | Genome-fragment | NA | 0.1   | 0 |
| S17-final-viral-combined_k141_113978 | [full]   | 2862   | No | NA | 0 | 4  | Not-determined | Genome-fragment | NA | 0     | 0 |
| S17-final-viral-combined_k141_256378 | [full]   | 2286   | No | NA | 0 | 0  | Not-determined | Genome-fragment | NA | 0     | 0 |
| S17-final-viral-combined_k141_232946 | [full]   | 2584   | No | NA | 0 | 0  | Not-determined | Genome-fragment | NA | 0     | 0 |
| S17-final-viral-combined_k141_45284  | [full]   | 3205   | No | NA | 0 | 3  | Not-determined | Genome-fragment | NA | 0     | 0 |
| S8-final-viral-combined_k141_214933  | [full]   | 2089   | No | NA | 0 | 0  | Low-quality    | Genome-fragment | NA | 7.78  | 0 |
| S8-final-viral-combined_k141_397781  | [full]   | 2090   | No | NA | 1 | 0  | Low-quality    | Genome-fragment | NA | 3.89  | 0 |
| S17-final-viral-combined_k141_200848 | [full]   | 2745   | No | NA | 0 | 2  | Not-determined | Genome-fragment | NA | 0     | 0 |
| S17-final-viral-combined_k141_760    | [full]   | 2470   | No | NA | 0 | 2  | Not-determined | Genome-fragment | NA | 0     | 0 |
| S17-final-viral-combined_k141_189597 | [full]   | 2139   | No | NA | 0 | 2  | Not-determined | Genome-fragment | NA | 0     | 0 |
| S1_k141_245962                       |          | 2090   | No | NA | 0 | 0  | Low-quality    | Genome-fragment | NA | 3.95  | 0 |
| S17-final-viral-combined_k141_189605 | [full]   | 2254   | No | NA | 0 | 0  | Not-determined | Genome-fragment | NA | 0     | 0 |
| S17-final-viral-combined_k141_112002 | [full]   | 1984   | No | NA | 0 | 1  | Not-determined | Genome-fragment | NA | 0     | 0 |
| S4-final-viral-combined_k141_60997   | [full]   | 2090   | No | NA | 0 | 0  | Low-quality    | Genome-fragment | NA | 3.83  | 0 |
| S17-final-viral-combined_k141_78711  | [full]   | 1908   | No | NA | 2 | 0  | Not-determined | Genome-fragment | NA | 0     | 0 |
| S17-final-viral-combined_k141_787    | [full]   | 1053   | No | NA | 0 | 1  | Not-determined | Genome-fragment | NA | 0     | 0 |
| S17-final-viral-combined_k141_112013 | [full]   | 1263   | No | NA | 0 | 2  | Not-determined | Genome-fragment | NA | 0     | 0 |
| S9-final-viral-combined_k141_66740   | [full]   | 2091   | No | NA | 0 | 1  | Low-quality    | Genome-fragment | NA | 1.53  | 0 |
| S11-final-viral-combined_k141_27620  | [full]   | 2091   | No | NA | 0 | 1  | Low-quality    | Genome-fragment | NA | 1.4   | 0 |
| S14-final-viral-combined_k141_269247 | [full]   | 2091   | No | NA | 0 | 1  | Low-quality    | Genome-fragment | NA | 2.4   | 0 |
| S17-final-viral-combined_k141_112028 | [full]   | 2112   | No | NA | 0 | 2  | Not-determined | Genome-fragment | NA | 0     | 0 |
| S17-final-viral-combined_k141_56263  | [full]   | 1938   | No | NA | 0 | 0  | Not-determined | Genome-fragment | NA | 0     | 0 |
| S17_k141_155925                      |          | 2091   | No | NA | 0 | 0  | Low-quality    | Genome-fragment | NA | 1.87  | 0 |
| S17-final-viral-combined_k141_78740  | [full]   | 2660   | No | NA | 0 | 0  | Not-determined | Genome-fragment | NA | 0     | 0 |
| S17-final-viral-combined_k141_178426 | [full]   | 5089   | No | NA | 0 | 3  | Not-determined | Genome-fragment | NA | 0     | 0 |
| S12-final-viral-combined_k141_290319 | [full]   | 2091   | No | NA | 0 | 1  | Low-quality    | Genome-fragment | NA | 4.85  | 0 |
| S3-final-viral-combined_k141_236338  | [full]   | 2091   | No | NA | 0 | 1  | Low-quality    | Genome-fragment | NA | 4.89  | 0 |
| S4-final-viral-combined_k141_63222   | [H2gene] | 2091   | No | NA | 1 | 0  | Low-quality    | Genome-fragment | NA | 2.06  | 0 |
| S17-final-viral-combined_k141_145398 | [full]   | 7548   | No | NA | 0 | 4  | Not-determined | Genome-fragment | NA | 0     | 0 |
| S17-final-viral-combined_k141_112085 | [full]   | 1236   | No | NA | 0 | 1  | Not-determined | Genome-fragment | NA | 0     | 0 |
| S17-final-viral-combined_k141_201040 | [full]   | 1413   | No | NA | 0 | 2  | Not-determined | Genome-fragment | NA | 0     | 0 |
| S6-final-viral-combined_k141_69101   | [full]   | 2091   | No | NA | 0 | 0  | Low-quality    | Genome-fragment | NA | 4.89  | 0 |
| S9-final-viral-combined_k141_37742   | [full]   | 2092   | No | NA | 0 | 0  | Low-quality    | Genome-fragment | NA | 3.41  | 0 |
| S17-final-viral-combined_k141_178477 | [full]   | 1240   | No | NA | 0 | 2  | Not-determined | Genome-fragment | NA | 0     | 0 |
| S9_k141_78280                        |          | 2092   | No | NA | 0 | 2  | Low-quality    | Genome-fragment | NA | 1.42  | 0 |
| S11-final-viral-combined_k141_49134  | [full]   | 2092   | No | NA | 1 | 0  | Low-quality    | Genome-fragment | NA | 4.87  | 0 |
| S17-final-viral-combined_k141_21212  | [full]   | 1391   | No | NA | 0 | 2  | Not-determined | Genome-fragment | NA | 0     | 0 |
| S17-final-viral-combined_k141_233955 | [full]   | 20090  | No | NA | 0 | 10 | Not-determined | Genome-fragment | NA | 0     | 0 |
| S17-final-viral-combined_k141_45035  | [full]   | 5737   | No | NA | 0 | 3  | Not-determined | Genome-fragment | NA | 0     | 0 |
| S14-final-viral-combined_k141_526343 | [full]   | 2092   | No | NA | 1 | 0  | Low-quality    | Genome-fragment | NA | 3.16  | 0 |
| S17-final-viral-combined_k141_117971 | [full]   | 3110   | No | NA | 0 | 2  | Not-determined | Genome-fragment | NA | 0     | 0 |
| S17-final-viral-combined_k141_154242 | [full]   | 2092   | No | NA | 1 | 0  | Low-quality    | Genome-fragment | NA | 3.82  | 0 |
| S17-final-viral-combined_k141_78825  | [full]   | 1356   | No | NA | 0 | 2  | Not-determined | Genome-fragment | NA | 0     | 0 |
| S17-final-viral-combined_k141_56161  | [full]   | 5731   | No | NA | 0 | 4  | Not-determined | Genome-fragment | NA | 0     | 0 |
| S17-final-viral-combined_k141_234001 | [full]   | 1964   | No | NA | 0 | 2  | Not-determined | Genome-fragment | NA | 0     | 0 |
| S17-final-viral-combined_k141_21890  | [full]   | 2092   | No | NA | 2 | 0  | Low-quality    | Genome-fragment | NA | 5.3   | 0 |
| S17-final-viral-combined_k141_22818  | [full]   | 19323  | No | NA | 0 | 2  | Not-determined | Genome-fragment | NA | 0     | 0 |
| S17-final-viral-combined_k141_145461 | [full]   | 1350   | No | NA | 0 | 0  | Not-determined | Genome-fragment | NA | 0     | 0 |
| S17-final-viral-combined_k141_45076  | [full]   | 2128   | No | NA | 0 | 4  | Not-determined | Genome-fragment | NA | 0     | 0 |
| S17-final-viral-combined_k141_156362 | [full]   | 1861   | No | NA | 0 | 2  | Not-determined | Genome-fragment | NA | 0     | 0 |
| S12-final-viral-combined_k141_171633 | [full]   | 2092   | No | NA | 0 | 0  | Low-quality    | Genome-fragment | NA | 3.88  | 0 |
| S17-final-viral-combined_k141_11850  | [full]   | 2018   | No | NA | 0 | 1  | Not-determined | Genome-fragment | NA | 0     | 0 |
| S12-final-viral-combined_k141_38438  | [full]   | 2092   | No | NA | 0 | 1  | Low-quality    | Genome-fragment | NA | 1.77  | 0 |
| S6-final-viral-combined_k141_91044   | [full]   | 2092   | No | NA | 0 | 0  | Low-quality    | Genome-fragment | NA | 0.35  | 0 |
| S17-final-viral-combined_k141_178560 | [full]   | 1120   | No | NA | 0 | 2  | Not-determined | Genome-fragment | NA | 0     | 0 |
| S17-final-viral-combined_k141_11855  | [full]   | 2018   | No | NA | 0 | 1  | Not-determined | Genome-fragment | NA | 0     | 0 |
| S17-final-viral-combined_k141_45099  | [full]   | 2347   | No | NA | 0 | 3  | Not-determined | Genome-fragment | NA | 0     | 0 |
| S17-final-viral-combined_k141_34187  | [full]   | 6649   | No | NA | 0 | 4  | Not-determined | Genome-fragment | NA | 0     | 0 |
| S17-final-viral-combined_k141_78886  | [full]   | 2797   | No | NA | 0 | 1  | Not-determined | Genome-fragment | NA | 0     | 0 |
| S8-final-viral-combined_k141_88792   | [full]   | 2092   | No | NA | 0 | 0  | Low-quality    | Genome-fragment | NA | 1.5   | 0 |
| S17-final-viral-combined_k141_78898  | [full]   | 2186   | No | NA | 0 | 2  | Not-determined | Genome-fragment | NA | 0     | 0 |
| S9_k141_52605                        |          | 2093   | No | NA | 0 | 1  | Low-quality    | Genome-fragment | NA | 2.33  | 0 |
| S17-final-viral-combined_k141_100685 | [full]   | 6407   | No | NA | 0 | 0  | Not-determined | Genome-fragment | NA | 3.79  | 0 |
| S9_k141_138251                       |          | 2093   | No | NA | 0 | 0  | Low-quality    | Genome-fragment | NA | 0     | 0 |
| S1-final-viral-combined_k141_187260  | [full]   | 2093   | No | NA | 0 | 2  | Low-quality    | Genome-fragment | NA | 4.84  | 0 |
| S17-final-viral-combined_k141_11896  | [full]   | 2279   | No | NA | 0 | 1  | Not-determined | Genome-fragment | NA | 0.89  | 0 |
| S1_k141_17516                        |          | 2093   | No | NA | 0 | 0  | Low-quality    | Genome-fragment | NA | 5.6   | 0 |
| S5-final-viral-combined_k141_177049  | [full]   | 2093   | No | NA | 0 | 0  | Low-quality    | Genome-fragment | NA | 0     | 0 |
| S17-final-viral-combined_k141_16476  | [full]   | 1485   | No | NA | 0 | 0  | Not-determined | Genome-fragment | NA | 0     | 0 |
| S17-final-viral-combined_k141_67617  | [full]   | 1892   | No | NA | 0 | 0  | Not-determined | Genome-fragment | NA | 2.54  | 0 |
| S7-final-viral-combined_k141_22850   | [full]   | 2093   | No | NA | 0 | 0  | Low-quality    | Genome-fragment | NA | 1.29  | 0 |
| S17_k141_80312                       |          | 2093   | No | NA | 0 | 3  | Low-quality    | Genome-fragment | NA | 0     | 0 |
| S17-final-viral-combined_k141_206540 | [full]   | 2317   | No | NA | 0 | 2  | Not-determined | Genome-fragment | NA | 0     | 0 |
| S17-final-viral-combined_k141_100739 | [full]   | 2786   | No | NA | 0 | 2  | Not-determined | Genome-fragment | NA | 0     |   |



|                                      |          |        |    |    |   |    |                |                 |       |      |
|--------------------------------------|----------|--------|----|----|---|----|----------------|-----------------|-------|------|
| S1-final-viral-combined_k141_230082  | [full]   | 2099   | No | NA | 2 | 0  | Low-quality    | Genome-fragment | 5.22  | 0    |
| S5_k141_146090                       |          | 2099   | No | NA | 4 | 0  | Low-quality    | Genome-fragment | 5.16  | 0    |
| S17-final-viral-combined_k141_111634 | [full]   | 2099   | No | NA | 1 | 0  | Low-quality    | Genome-fragment | 5.23  | 0    |
| S8-final-viral-combined_k141_141687  | [full]   | 2099   | No | NA | 0 | 0  | Low-quality    | Genome-fragment | 4.26  | 0    |
| S17-final-viral-combined_k141_34436  | [full]   | 1094   | No | NA | 0 | 0  | Not-determined | Genome-fragment | NA    | 0    |
| S17-final-viral-combined_k141_223535 | [full]   | 7031   | No | NA | 0 | 0  | Not-determined | Genome-fragment | NA    | 0    |
| S17-final-viral-combined_k141_256650 | [full]   | 2756   | No | NA | 0 | 1  | Not-determined | Genome-fragment | NA    | 0    |
| S1-final-viral-combined_k141_162547  | [full]   | 2100   | No | NA | 0 | 0  | Low-quality    | Genome-fragment | 1.46  | 0    |
| S3-final-viral-combined_k141_159877  | [full]   | 2100   | No | NA | 0 | 0  | Low-quality    | Genome-fragment | 5.88  | 0    |
| S17-final-viral-combined_k141_145687 | [full]   | 2595   | No | NA | 0 | 3  | Not-determined | Genome-fragment | NA    | 0    |
| S12-final-viral-combined_k141_90133  | [full]   | 2100   | No | NA | 0 | 1  | Low-quality    | Genome-fragment | 0.84  | 0    |
| S12-final-viral-combined_k141_147576 | [full]   | 2100   | No | NA | 0 | 0  | Low-quality    | Genome-fragment | 4.79  | 0    |
| S17-final-viral-combined_k141_67839  | [full]   | 1982   | No | NA | 0 | 0  | Not-determined | Genome-fragment | NA    | 0    |
| S4-final-viral-combined_k141_76036   | [full]   | 2100   | No | NA | 0 | 2  | Low-quality    | Genome-fragment | 2.12  | 0    |
| S17-final-viral-combined_k141_12087  | [full]   | 1531   | No | NA | 0 | 0  | Not-determined | Genome-fragment | NA    | 0    |
| S17-final-viral-combined_k141_112451 | [full]   | 2383   | No | NA | 0 | 0  | Not-determined | Genome-fragment | NA    | 0    |
| S1-final-viral-combined_k141_62326   | [full]   | 2101   | No | NA | 0 | 1  | Low-quality    | Genome-fragment | 1.01  | 0    |
| S17-final-viral-combined_k141_67864  | [full]   | 1771   | No | NA | 0 | 1  | Not-determined | Genome-fragment | NA    | 0    |
| S17-final-viral-combined_k141_121046 | [full]   | 6414   | No | NA | 0 | 1  | Not-determined | Genome-fragment | NA    | 0    |
| S1-final-viral-combined_k141_376253  | [full]   | 2101   | No | NA | 0 | 0  | Low-quality    | Genome-fragment | 3.38  | 0    |
| S17-final-viral-combined_k141_12087  | [full]   | 2265   | No | NA | 0 | 1  | Not-determined | Genome-fragment | NA    | 0    |
| S7-final-viral-combined_k141_158027  | [full]   | 2101   | No | NA | 0 | 2  | Low-quality    | Genome-fragment | NA    | 0    |
| S17-final-viral-combined_k141_212412 | [full]   | 1649   | No | NA | 0 | 0  | Not-determined | Genome-fragment | NA    | 1.15 |
| S17-final-viral-combined_k141_1138   | [full]   | 5006   | No | NA | 0 | 3  | Not-determined | Genome-fragment | NA    | 0    |
| S17-final-viral-combined_k141_198071 | [full]   | 2101   | No | NA | 0 | 2  | Low-quality    | Genome-fragment | 2.45  | 0    |
| S17-final-viral-combined_k141_212417 | [full]   | 1514   | No | NA | 0 | 1  | Not-determined | Genome-fragment | NA    | 0    |
| S17-final-viral-combined_k141_89787  | [full]   | 3498   | No | NA | 0 | 3  | Not-determined | Genome-fragment | NA    | 0    |
| S17-final-viral-combined_k141_67895  | [full]   | 1473   | No | NA | 0 | 0  | Not-determined | Genome-fragment | NA    | 0    |
| S17-final-viral-combined_k141_178974 | [full]   | 4848   | No | NA | 0 | 4  | Not-determined | Genome-fragment | NA    | 0    |
| S12_k141_137512                      |          | 2101   | No | NA | 0 | 0  | Low-quality    | Genome-fragment | 2.61  | 0    |
| S17-final-viral-combined_k141_178984 | [full]   | 1778   | No | NA | 0 | 1  | Not-determined | Genome-fragment | NA    | 0    |
| S8-final-viral-combined_k141_234631  | [full]   | 2101   | No | NA | 1 | 1  | Low-quality    | Genome-fragment | 4.12  | 0    |
| S7-final-viral-combined_k141_54971   | [full]   | 2102   | No | NA | 0 | 1  | Low-quality    | Genome-fragment | 2.89  | 0    |
| S17-final-viral-combined_k141_79266  | [full]   | 2484   | No | NA | 0 | 3  | Not-determined | Genome-fragment | NA    | 0    |
| S7-final-viral-combined_k141_25443   | [full]   | 2102   | No | NA | 0 | 0  | Low-quality    | Genome-fragment | 5.63  | 0    |
| S12-final-viral-combined_k141_60301  | [full]   | 2102   | No | NA | 0 | 0  | Low-quality    | Genome-fragment | NA    | 0    |
| S17-final-viral-combined_k141_23144  | [full]   | 29863  | No | NA | 0 | 19 | Not-determined | Genome-fragment | NA    | 0    |
| S2-final-viral-combined_k141_197066  | [full]   | 2102   | No | NA | 2 | 0  | Low-quality    | Genome-fragment | 3.45  | 0    |
| S2-final-viral-combined_k141_37249   | [full]   | 2102   | No | NA | 1 | 1  | Low-quality    | Genome-fragment | 2.55  | 0    |
| S17-final-viral-combined_k141_12118  | [full]   | 1564   | No | NA | 0 | 1  | Not-determined | Genome-fragment | NA    | 0    |
| S8-final-viral-combined_k141_19478   | [full]   | 2102   | No | NA | 1 | 0  | Low-quality    | Genome-fragment | 3.54  | 0    |
| S17-final-viral-combined_k141_24505  | [full]   | 1621   | No | NA | 2 | 2  | Not-determined | Genome-fragment | NA    | 0    |
| S1-final-viral-combined_k141_315851  | [full]   | 2103   | No | NA | 2 | 0  | Low-quality    | Genome-fragment | 6.94  | 0    |
| S17-final-viral-combined_k141_67960  | [full]   | 3820   | No | NA | 0 | 3  | Not-determined | Genome-fragment | NA    | 0    |
| S17-final-viral-combined_k141_223678 | [full]   | 1759   | No | NA | 0 | 0  | Not-determined | Genome-fragment | NA    | 0    |
| S3-final-viral-combined_k141_63891   | [full]   | 2103   | No | NA | 0 | 0  | Low-quality    | Genome-fragment | 6.18  | 0    |
| S17-final-viral-combined_k141_100937 | [full]   | 2686   | No | NA | 0 | 3  | Not-determined | Genome-fragment | NA    | 0    |
| S17-final-viral-combined_k141_212470 | [full]   | 1616   | No | NA | 0 | 1  | Not-determined | Genome-fragment | NA    | 0    |
| S17-final-viral-combined_k141_123580 | [full]   | 3176   | No | NA | 0 | 2  | Not-determined | Genome-fragment | NA    | 0    |
| S17-k141_44577                       |          | 2103   | No | NA | 0 | 2  | Low-quality    | Genome-fragment | 1.18  | 0    |
| S17-final-viral-combined_k141_212472 | [full]   | 2232   | No | NA | 0 | 0  | Not-determined | Genome-fragment | NA    | 0    |
| S17-final-viral-combined_k141_232931 | [full]   | 1260   | No | NA | 0 | 0  | Not-determined | Genome-fragment | NA    | 0    |
| S17-final-viral-combined_k141_45357  | [full]   | 3471   | No | NA | 0 | 0  | Not-determined | Genome-fragment | NA    | 0    |
| S17-final-viral-combined_k141_223719 | [full]   | 1703   | No | NA | 0 | 2  | Not-determined | Genome-fragment | NA    | 0    |
| S17-final-viral-combined_k141_23201  | [full]   | 1709   | No | NA | 0 | 3  | Not-determined | Genome-fragment | NA    | 0    |
| S17-final-viral-combined_k141_179084 | [full]   | 6455   | No | NA | 0 | 0  | Not-determined | Genome-fragment | NA    | 0    |
| S17-final-viral-combined_k141_223727 | [full]   | 5915   | No | NA | 0 | 4  | Not-determined | Genome-fragment | NA    | 0    |
| S17-final-viral-combined_k141_68038  | [full]   | 2134   | No | NA | 0 | 1  | Not-determined | Genome-fragment | NA    | 0    |
| S17-final-viral-combined_k141_23131  | [full]   | 2269   | No | NA | 0 | 2  | Not-determined | Genome-fragment | NA    | 0    |
| S2-final-viral-combined_k141_174128  | [full]   | 2103   | No | NA | 0 | 1  | Low-quality    | Genome-fragment | 6     | 0    |
| S17-final-viral-combined_k141_23216  | [full]   | 1386   | No | NA | 0 | 0  | Not-determined | Genome-fragment | NA    | 0    |
| S4_k141_66956                        |          | 2103   | No | NA | 0 | 0  | Low-quality    | Genome-fragment | 2.78  | 0    |
| S9-final-viral-combined_k141_67917   | [full]   | 2104   | No | NA | 0 | 1  | Low-quality    | Genome-fragment | 2.59  | 0    |
| S11-final-viral-combined_k141_73388  | [full]   | 2104   | No | NA | 0 | 0  | Low-quality    | Genome-fragment | 3.53  | 0    |
| S17-final-viral-combined_k141_12282  | [full]   | 1459   | No | NA | 0 | 0  | Not-determined | Genome-fragment | NA    | 0    |
| S11-final-viral-combined_k141_65465  | [full]   | 2104   | No | NA | 0 | 1  | Low-quality    | Genome-fragment | 2.61  | 0    |
| S17-final-viral-combined_k141_101010 | [full]   | 2829   | No | NA | 0 | 0  | Not-determined | Genome-fragment | NA    | 0    |
| S17-final-viral-combined_k141_212554 | [full]   | 4183   | No | NA | 0 | 4  | Not-determined | Genome-fragment | NA    | 0    |
| S17-final-viral-combined_k141_273476 | [full]   | 2854   | No | NA | 1 | 0  | Low-quality    | Genome-fragment | 0.75  | 0    |
| S17-final-viral-combined_k141_223748 | [full]   | 4859   | No | NA | 1 | 0  | Medium-quality | Genome-fragment | 80.87 | 0    |
| S1-final-viral-combined_k141_82328   | [full]   | 2104   | No | NA | 0 | 1  | Low-quality    | Genome-fragment | 1.73  | 0    |
| S1-final-viral-combined_k141_103839  | [full]   | 2104   | No | NA | 0 | 0  | Low-quality    | Genome-fragment | 5.5   | 0    |
| S5-final-viral-combined_k141_169468  | [full]   | 2104   | No | NA | 2 | 0  | Low-quality    | Genome-fragment | 4.02  | 0    |
| S7-final-viral-combined_k141_115991  | [full]   | 2104   | No | NA | 0 | 0  | Low-quality    | Genome-fragment | 3.18  | 0    |
| S7-final-viral-combined_k141_119893  | [full]   | 2105   | No | NA | 0 | 0  | Low-quality    | Genome-fragment | 3.47  | 0    |
| S7-final-viral-combined_k141_40345   | [full]   | 2105   | No | NA | 0 | 3  | Low-quality    | Genome-fragment | 0.94  | 0    |
| S17-final-viral-combined_k141_34621  | [full]   | 2817   | No | NA | 0 | 0  | Not-determined | Genome-fragment | NA    | 0    |
| S17-final-viral-combined_k141_256782 | [full]   | 3254   | No | NA | 0 | 0  | Not-determined | Genome-fragment | NA    | 0    |
| S17-final-viral-combined_k141_145487 | [full]   | 2461   | No | NA | 0 | 2  | Not-determined | Genome-fragment | NA    | 0    |
| S17-final-viral-combined_k141_223773 | [full]   | 7500   | No | NA | 0 | 5  | Not-determined | Genome-fragment | NA    | 0    |
| S17-final-viral-combined_k141_123692 | [full]   | 2347   | No | NA | 0 | 1  | Not-determined | Genome-fragment | NA    | 0    |
| S17-final-viral-combined_k141_167857 | [full]   | 1184   | No | NA | 0 | 0  | Not-determined | Genome-fragment | NA    | 0    |
| S17-final-viral-combined_k141_68131  | [full]   | 2503   | No | NA | 0 | 1  | Not-determined | Genome-fragment | NA    | 0    |
| S17-final-viral-combined_k141_124931 | [full]   | 124931 | No | NA | 0 | 8  | Not-determined | Genome-fragment | NA    | 0    |
| S2-final-viral-combined_k141_82256   | [full]   | 2105   | No | NA | 0 | 1  | Low-quality    | Genome-fragment | 2.46  | 0    |
| S17-final-viral-combined_k141_156704 | [full]   | 2561   | No | NA | 0 | 1  | Not-determined | Genome-fragment | NA    | 0    |
| S8-final-viral-combined_k141_232362  | [full]   | 2105   | No | NA | 2 | 0  | Low-quality    | Genome-fragment | 5.37  | 0    |
| S8-final-viral-combined_k141_124762  | [H2gene] | 2106   | No | NA | 1 | 0  | Low-quality    | Genome-fragment | 5.08  | 0    |
| S17-final-viral-combined_k141_79451  | [full]   | 2272   | No | NA | 0 | 0  | Not-determined | Genome-fragment | NA    | 0    |
| S17-final-viral-combined_k141_89979  | [full]   | 1600   | No | NA | 0 | 0  | Not-determined | Genome-fragment | NA    | 0    |
| S5-final-viral-combined_k141_190248  | [full]   | 2106   | No | NA | 0 | 0  | Low-quality    | Genome-fragment | 5.89  | 0    |
| S2-final-viral-combined_k141_226222  | [full]   | 2106   | No | NA | 0 | 0  | Low-quality    | Genome-fragment | 33.55 | 0    |
| S17-final-viral-combined_k141_123768 | [full]   | 1135   | No | NA | 0 | 1  | Not-determined | Genome-fragment | NA    | 0    |
| S17-final-viral-combined_k141_101111 | [full]   | 1140   | No | NA | 0 | 1  | Not-determined | Genome-fragment | NA    | 0    |
| S17-final-viral-combined_k141_89994  | [full]   | 2329   | No | NA | 0 | 0  | Not-determined | Genome-fragment | NA    | 0    |
| S8_k141_5569                         |          | 2106   | No | NA | 0 | 0  | Low-quality    | Genome-fragment | 3.41  | 0    |
| S17-final-viral-combined_k141_212670 | [full]   | 1030   | No | NA | 0 | 0  | Not-determined | Genome-fragment | NA    | 0    |
| S17-final-viral-combined_k141_203651 | [full]   | 6155   | No | NA | 0 | 0  | Not-determined | Genome-fragment | NA    | 0    |
| S9-final-viral-combined_k141_107393  | [H2gene] | 2107   | No | NA | 0 | 0  | Low-quality    | Genome-fragment | 4.52  | 0    |
| S17-final-viral-combined_k141_90005  | [full]   | 6562   | No | NA | 0 | 5  | Not-determined | Genome-fragment | NA    | 0    |
| S9_k141_45464                        |          | 2107   | No | NA | 0 | 1  | Low-quality    | Genome-fragment | 3.61  | 0    |
| S17-final-viral-combined_k141_34624  | [full]   | 4548   | No | NA | 0 | 1  | Not-determined | Genome-fragment | NA    | 0    |
| S17-final-viral-combined_k141_45413  | [full]   | 3379   | No | NA | 0 | 2  | Not-determined | Genome-fragment | NA    | 0    |
| S11-final-viral-combined_k141_285876 | [full]   | 2107   | No | NA | 0 | 2  | Low-quality    | Genome-fragment | 1.01  | 0    |
| S11_k141_124222                      |          | 2107   | No | NA | 0 | 1  | Low-quality    | Genome-fragment | 1.23  | 0    |
| S12-final-viral-combined_k141_67765  | [full]   | 2107   | No | NA | 1 | 0  | Low-quality    | Genome-fragment | 2.69  | 0    |
| S17-final-viral-combined_k141_212705 | [full]   | 1721   | No | NA | 0 | 0  | Not-determined | Genome-fragment | NA    | 0    |
| S17-final-viral-combined_k141_156787 | [full]   | 1105   | No | NA | 0 | 1  | Not-determined | Genome-fragment | NA    | 0    |
| S17-final-viral-combined_k141_23138  | [full]   | 2915   | No | NA | 0 | 0  | Not-determined | Genome-fragment | NA    | 0    |
| S17-final-viral-combined_k141_79573  | [full]   | 1457   | No | NA | 0 | 0  | Not-determined | Genome-fragment | NA    | 0    |
| S17-final-viral-combined_k141_79580  | [full]   | 3042   | No | NA | 0 | 1  | Not-determined | Genome-fragment | NA    | 0    |
| S12-final-viral-combined_k141_151775 | [full]   | 2107   | No | NA | 0 | 0  | Low-quality    | Genome-fragment | 1.64  | 0    |
| S2-final-viral-combined_k141_179583  | [full]   | 2107   | No | NA | 1 | 0  | Low-quality    | Genome-fragment | 3.85  | 0    |
| S17-final-viral-combined_k141_90047  | [full]   | 3093   | No | NA | 0 | 2  | Not-determined | Genome-fragment | NA    | 0    |
| S8-final-viral-combined_k141_174151  | [full]   | 2107   | No | NA | 1 | 0  | Low-quality    | Genome-fragment | 1.21  | 0    |
| S17-final-viral-combined_k141_1373   | [full]   | 2141   | No | NA | 0 | 2  | Not-determined | Genome-fragment | NA    | 0    |
| S1-final-viral-combined_k141_215465  | [full]   | 2108   | No | NA | 0 | 0  | Low-quality    | Genome-fragment | 4.51  | 0    |
| S1-final-viral-combined_k141_335152  | [H2gene] | 2108   | No | NA | 1 | 0  | Low-quality    | Genome-fragment | 4.7   | 0    |
| S5-final-viral-combined_k141_340241  | [full]   | 2108   | No | NA | 0 | 0  | Low-quality    | Genome-fragment | 3.49  | 0    |
| S2-final-viral-combined_k141_18841   | [full]   | 2108   | No | NA | 1 | 0  | Low-quality    | Genome-fragment | NA    | 0    |
| S17-final-viral-combined_k141_212783 | [full]   | 3284   | No | NA | 0 | 0  | Not-determined | Genome-fragment | NA    | 3.05 |
| S8-final-viral-combined_k141_184891  | [full]   | 2108   | No | NA | 0 | 0  | Low-quality    | Genome-fragment | NA    | 0    |
| S17-final-viral-combined_k141_145970 | [full]   | 2071   | No | NA | 0 | 2  | Not-determined | Genome-fragment | NA    | 0    |
| S17-final-viral-combined_k141_45462  | [full]   | 2754   | No | NA | 0 | 1  | Not-determined | Genome-fragment | NA    | 0    |
| S9-final-viral-combined_k141_951451  | [full]   | 2109   | No | NA | 0 | 2  | Low-quality    | Genome-fragment | 2.43  | 0    |
| S17-final-viral-combined_k141_256942 | [full]   | 4656   | No | NA | 0 | 3  | Not-determined | Genome-fragment | NA    | 0    |
| S17-final-viral-combined_k141_212836 | [full]   | 1438   | No | NA | 0 | 0  | Not-determined | Genome-fragment | NA    | 0    |
| S9-final-viral-combined_k141_698203  | [H2gene] | 2109   | No | NA | 0 | 0  | Low-quality    | Genome-fragment | 4.81  | 0    |
| S17-final-viral-combined_k141_201800 | [full]   | 2575   | No | NA | 0 | 1  | Not-determined | Genome-fragment | NA    | 0    |
| S17-final-v                          |          |        |    |    |   |    |                |                 |       |      |



|                                       |              |       |     |    |      |    |                |                 |       |       |
|---------------------------------------|--------------|-------|-----|----|------|----|----------------|-----------------|-------|-------|
| S17-final-viral-combined_k141_179363  | [full]       | 18354 | No  | NA | 11   | 0  | Medium-quality | Genome-fragment | 52    | 0     |
| S17-final-viral-combined_k141_184159  | [full]       | 8205  | No  | NA | 0    | 0  | Not-determined | Genome-fragment | NA    | 0     |
| S17-final-viral-combined_k141_201943  | [full]       | 1732  | No  | NA | 0    | 0  | Not-determined | Genome-fragment | NA    | 0     |
| S5-final-viral-combined_k141_58241    | [full]       | 2111  | No  | NA | 1    | 0  | Low-quality    | Genome-fragment | 3.52  | 0     |
| S17-final-viral-combined_k141_190496  | [full]       | 6091  | No  | NA | 0    | 3  | Not-determined | Genome-fragment | NA    | 0     |
| S17-final-viral-combined_k141_231451  | [full]       | 1283  | No  | NA | 0    | 1  | Not-determined | Genome-fragment | NA    | 0     |
| S7-final-viral-combined_k141_56688    | [full]       | 2111  | No  | NA | 0    | 0  | Low-quality    | Genome-fragment | 4.46  | 0     |
| S17-final-viral-combined_k141_257222  | [full]       | 4254  | No  | NA | 0    | 3  | Not-determined | Genome-fragment | NA    | 0     |
| S17-final-viral-combined_k141_1657110 | [full]       | 3654  | No  | NA | 0    | 3  | Not-determined | Genome-fragment | NA    | 0     |
| S17-final-viral-combined_k141_146149  | [full]       | 4351  | No  | NA | 0    | 2  | Not-determined | Genome-fragment | NA    | 0     |
| S17-final-viral-combined_k141_23558   | [full]       | 1368  | No  | NA | 0    | 1  | Not-determined | Genome-fragment | NA    | 0     |
| S7-final-viral-combined_k141_193186   | [full]       | 2111  | No  | NA | 0    | 0  | Low-quality    | Genome-fragment | 1.19  | 0     |
| S2-final-viral-combined_k141_56673    | [full]       | 2111  | No  | NA | 0    | 0  | Low-quality    | Genome-fragment | 3.96  | 0     |
| S17-final-viral-combined_k141_45708   | [full]       | 2219  | No  | NA | 0    | 0  | Not-determined | Genome-fragment | NA    | 0     |
| S2_k141_101222                        | [full]       | 2111  | No  | NA | 0    | 0  | Low-quality    | Genome-fragment | 2.46  | 0     |
| S4_k141_87211                         | [full]       | 2111  | No  | NA | 0    | 1  | Low-quality    | Genome-fragment | 0.94  | 0     |
| S17-final-viral-combined_k141_79902   | [full]       | 2155  | No  | NA | 0    | 1  | Not-determined | Genome-fragment | NA    | 0     |
| S17-final-viral-combined_k141_146178  | [full]       | 2951  | No  | NA | 0    | 1  | Not-determined | Genome-fragment | NA    | 0     |
| S17-final-viral-combined_k141_16602   | [full]       | 2119  | No  | NA | 0    | 2  | Not-determined | Genome-fragment | NA    | 0     |
| S17-final-viral-combined_k141_23592   | [full]       | 3420  | No  | NA | 0    | 1  | Not-determined | Genome-fragment | NA    | 0     |
| S17-final-viral-combined_k141_134960  | [full]       | 2111  | No  | NA | 0    | 0  | Not-determined | Genome-fragment | NA    | 0     |
| S6_k141_78951                         | [full]       | 2111  | No  | NA | 0    | 1  | Low-quality    | Genome-fragment | 0.51  | 0     |
| S11-final-viral-combined_k141_112409  | [full]       | 2112  | No  | NA | 0    | 2  | Low-quality    | Genome-fragment | 0.73  | 0     |
| S7-final-viral-combined_k141_109244   | [full]       | 2112  | No  | NA | 4    | 0  | Low-quality    | Genome-fragment | 4.65  | 0     |
| S17-final-viral-combined_k141_175705  | [full]       | 2112  | No  | NA | 1    | 0  | Low-quality    | Genome-fragment | 3.06  | 0     |
| S17-final-viral-combined_k141_202041  | [full]       | 1347  | No  | NA | 0    | 2  | Not-determined | Genome-fragment | NA    | 0     |
| S8-final-viral-combined_k141_88273    | [full]       | 2112  | No  | NA | 2    | 0  | Low-quality    | Genome-fragment | 5.16  | 0     |
| S17-final-viral-combined_k141_124170  | [full]       | 4469  | No  | NA | 0    | 3  | Not-determined | Genome-fragment | NA    | 0     |
| S17-final-viral-combined_k141_101450  | [full]       | 4428  | No  | NA | 1    | 1  | Not-determined | Genome-fragment | NA    | 0     |
| S17-final-viral-combined_k141_168254  | [full]       | 2779  | No  | NA | 0    | 2  | Not-determined | Genome-fragment | NA    | 0     |
| S1-final-viral-combined_k141_102189   | [full]       | 2113  | No  | NA | 0    | 2  | Low-quality    | Genome-fragment | 6.8   | 0     |
| S7-final-viral-combined_k141_172799   | [full]       | 2113  | No  | NA | 0    | 0  | Low-quality    | Genome-fragment | 5.57  | 0     |
| S12_k141_350537                       | [full]       | 2113  | No  | NA | 1    | 0  | Low-quality    | Genome-fragment | 7.16  | 0     |
| S6-final-viral-combined_k141_78739    | [full]       | 2113  | No  | NA | 0    | 1  | Low-quality    | Genome-fragment | 3.73  | 0     |
| S17-final-viral-combined_k141_168283  | [full]       | 7216  | No  | NA | 0    | 0  | Not-determined | Genome-fragment | NA    | 0     |
| S17-final-viral-combined_k141_234881  | [full]       | 2014  | No  | NA | 0    | 1  | Not-determined | Genome-fragment | NA    | 0     |
| S17-final-viral-combined_k141_213008  | [full]       | 2297  | No  | NA | 0    | 3  | Not-determined | Genome-fragment | NA    | 0     |
| S5-final-viral-combined_k141_176277   | [full]       | 2114  | No  | NA | 1    | 0  | Low-quality    | Genome-fragment | 3.38  | 0     |
| S17-final-viral-combined_k141_222984  | [full]       | 2114  | No  | NA | 2    | 0  | Low-quality    | Genome-fragment | 4.42  | 0     |
| S6_k141_18168                         | [full]       | 2114  | No  | NA | 0    | 0  | Low-quality    | Genome-fragment | 2.23  | 0     |
| S17-final-viral-combined_k141_113066  | [full]       | 1201  | No  | NA | 0    | 0  | Not-determined | Genome-fragment | NA    | 0     |
| S17-final-viral-combined_k141_124265  | [full]       | 2310  | No  | NA | 0    | 2  | Not-determined | Genome-fragment | NA    | 0     |
| S17-final-viral-combined_k141_190683  | [full]       | 5531  | No  | NA | 0    | 3  | Not-determined | Genome-fragment | NA    | 0     |
| S17-final-viral-combined_k141_190694  | [full]       | 17546 | No  | NA | 0    | 12 | Not-determined | Genome-fragment | NA    | 0     |
| S17-final-viral-combined_k141_213065  | [full]       | 2002  | No  | NA | 0    | 3  | Not-determined | Genome-fragment | NA    | 0     |
| S17-final-viral-combined_k141_179572  | [full]       | 2875  | No  | NA | 0    | 0  | Not-determined | Genome-fragment | NA    | 0     |
| S17-final-viral-combined_k141_224379  | [full]       | 1764  | No  | NA | 0    | 2  | Not-determined | Genome-fragment | NA    | 0     |
| S17-final-viral-combined_k141_103525  | [full]       | 1191  | No  | NA | 0    | 0  | Not-determined | Genome-fragment | NA    | 0     |
| S8-final-viral-combined_k141_232051   | [full]       | 2114  | No  | NA | 0    | 1  | Low-quality    | Genome-fragment | 7.33  | 0     |
| S17-final-viral-combined_k141_45772   | [full]       | 3490  | No  | NA | 0    | 2  | Not-determined | Genome-fragment | NA    | 0     |
| S12_k141_398970                       | [full]       | 2115  | No  | NA | 0    | 1  | Low-quality    | Genome-fragment | 6.75  | 0     |
| S17-final-viral-combined_k141_257999  | [full]       | 2917  | No  | NA | 0    | 1  | Not-determined | Genome-fragment | NA    | 0     |
| S17-final-viral-combined_k141_245912  | [full]       | 3582  | No  | NA | 0    | 0  | Not-determined | Genome-fragment | NA    | 0     |
| S17-final-viral-combined_k141_79987   | [full]       | 1794  | No  | NA | 0    | 2  | Not-determined | Genome-fragment | NA    | 0     |
| S17-final-viral-combined_k141_26278   | [full]       | 36737 | No  | NA | 23   | 0  | High-quality   | High-quality    | 100   | 0     |
| S2-final-viral-combined_k141_194792   | [full]       | 2115  | No  | NA | 0    | 0  | Low-quality    | Genome-fragment | 5.31  | 0     |
| S2-final-viral-combined_k141_124048   | [full]       | 2115  | No  | NA | 0    | 1  | Low-quality    | Genome-fragment | 4.16  | 0     |
| S17-final-viral-combined_k141_124294  | [full]       | 1175  | No  | NA | 0    | 0  | Not-determined | Genome-fragment | NA    | 0     |
| S17-final-viral-combined_k141_245938  | [full]       | 1233  | No  | NA | 0    | 1  | Not-determined | Genome-fragment | NA    | 0     |
| S17-final-viral-combined_k141_79998   | [full]       | 2212  | No  | NA | 0    | 2  | Not-determined | Genome-fragment | NA    | 0     |
| S17-final-viral-combined_k141_68638   | [full]       | 3408  | No  | NA | 0    | 1  | Not-determined | Genome-fragment | NA    | 0     |
| S8-final-viral-combined_k141_180212   | [full]       | 2115  | No  | NA | 0    | 1  | Low-quality    | Genome-fragment | 2.28  | 0     |
| S11-final-viral-combined_k141_115978  | [full]       | 2116  | No  | NA | 0    | 1  | Low-quality    | Genome-fragment | 5.74  | 0     |
| S17-final-viral-combined_k141_113156  | [full]       | 1001  | No  | NA | 0    | 1  | Not-determined | Genome-fragment | NA    | 0     |
| S17-final-viral-combined_k141_586791  | [full]       | 1855  | No  | NA | 0    | 2  | Not-determined | Genome-fragment | NA    | 0     |
| S17-final-viral-combined_k141_190805  | [full]       | 3717  | No  | NA | 0    | 3  | Not-determined | Genome-fragment | NA    | 0     |
| S17-final-viral-combined_k141_35134   | [full]       | 1462  | No  | NA | 0    | 1  | Not-determined | Genome-fragment | NA    | 0     |
| S5_k141_122895                        | [full]       | 2116  | Yes | NA | 1435 | 1  | Low-quality    | Genome-fragment | 12.18 | 32.18 |
| S17-final-viral-combined_k141_57290   | [full]       | 1069  | No  | NA | 0    | 1  | Not-determined | Genome-fragment | NA    | 0     |
| S17-final-viral-combined_k141_35142   | [full]       | 1074  | No  | NA | 0    | 1  | Not-determined | Genome-fragment | NA    | 0     |
| S12-final-viral-combined_k141_21513   | [full]       | 2116  | No  | NA | 0    | 2  | Low-quality    | Genome-fragment | 1.05  | 0     |
| S17-final-viral-combined_k141_18148   | [full]       | 2113  | No  | NA | 0    | 1  | Not-determined | Genome-fragment | NA    | 0     |
| S17-final-viral-combined_k141_224402  | [full]       | 1623  | No  | NA | 0    | 0  | Not-determined | Genome-fragment | NA    | 0     |
| S17-final-viral-combined_k141_213194  | [full]       | 2230  | No  | NA | 0    | 4  | Not-determined | Genome-fragment | NA    | 0     |
| S12-final-viral-combined_k141_260673  | [full]       | 2116  | No  | NA | 0    | 1  | Low-quality    | Genome-fragment | 1.85  | 0     |
| S4_k141_156013                        | [full]       | 2116  | No  | NA | 0    | 2  | Low-quality    | Genome-fragment | 0.7   | 0     |
| S8-final-viral-combined_k141_236296   | [full]       | 2116  | No  | NA | 0    | 0  | Low-quality    | Genome-fragment | 3.49  | 0     |
| S17-final-viral-combined_k141_212393  | [full]       | 2153  | No  | NA | 0    | 1  | Not-determined | Genome-fragment | NA    | 0     |
| S8-final-viral-combined_k141_235091   | [full]       | 2116  | No  | NA | 0    | 1  | Low-quality    | Genome-fragment | NA    | 0     |
| S17-final-viral-combined_k141_113234  | [full]       | 1830  | No  | NA | 0    | 1  | Not-determined | Genome-fragment | NA    | 0     |
| S17-final-viral-combined_k141_135279  | [full]       | 1022  | No  | NA | 0    | 0  | Not-determined | Genome-fragment | NA    | 0     |
| S17-final-viral-combined_k141_80068   | [full]       | 1263  | No  | NA | 0    | 2  | Not-determined | Genome-fragment | NA    | 0     |
| S17-final-viral-combined_k141_45857   | [full]       | 1456  | No  | NA | 0    | 2  | Not-determined | Genome-fragment | NA    | 0     |
| S1-final-viral-combined_k141_70367    | [full]       | 2117  | Yes | NA | 786  | 1  | Low-quality    | Genome-fragment | 18.89 | 62.87 |
| S17-final-viral-combined_k141_168523  | [full]       | 1462  | No  | NA | 0    | 2  | Not-determined | Genome-fragment | NA    | 0     |
| S3_k141_38893                         | [full]       | 2117  | No  | NA | 0    | 0  | Low-quality    | Genome-fragment | 3.8   | 0     |
| S17-final-viral-combined_k141_80069   | [full]       | 15430 | No  | NA | 0    | 9  | Not-determined | Genome-fragment | NA    | 0     |
| S17-final-viral-combined_k141_23836   | [full]       | 12888 | No  | NA | 0    | 10 | Not-determined | Genome-fragment | NA    | 0     |
| S17-final-viral-combined_k141_221245  | [full]       | 2117  | Yes | NA | 1096 | 0  | Low-quality    | Genome-fragment | 2.7   | 42.23 |
| S17-final-viral-combined_k141_235013  | [full]       | 2151  | No  | NA | 0    | 0  | Not-determined | Genome-fragment | NA    | 0     |
| S17-final-viral-combined_k141_213265  | [full]       | 1419  | No  | NA | 0    | 1  | Not-determined | Genome-fragment | NA    | 0     |
| S17-final-viral-combined_k141_150321  | [0, partial] | 2117  | No  | NA | 0    | 1  | Low-quality    | Genome-fragment | 49.29 | 0     |
| S17-final-viral-combined_k141_168556  | [full]       | 2241  | No  | NA | 0    | 3  | Not-determined | Genome-fragment | NA    | 0     |
| S12-final-viral-combined_k141_383671  | [full]       | 2117  | No  | NA | 0    | 2  | Low-quality    | Genome-fragment | 1.44  | 0     |
| S2-final-viral-combined_k141_159079   | [full]       | 2117  | No  | NA | 0    | 3  | Low-quality    | Genome-fragment | 0.67  | 0     |
| S1-final-viral-combined_k141_99766    | [full]       | 2118  | No  | NA | 0    | 0  | Low-quality    | Genome-fragment | 3.71  | 0     |
| S17-final-viral-combined_k141_135315  | [full]       | 1982  | No  | NA | 0    | 1  | Not-determined | Genome-fragment | NA    | 0     |
| S5-final-viral-combined_k141_194723   | [full]       | 2118  | No  | NA | 0    | 0  | Low-quality    | Genome-fragment | 4.94  | 0     |
| S17-final-viral-combined_k141_23841   | [full]       | 10356 | No  | NA | 0    | 7  | Not-determined | Genome-fragment | NA    | 0     |
| S17-final-viral-combined_k141_90496   | [full]       | 7942  | No  | NA | 0    | 9  | Not-determined | Genome-fragment | NA    | 0     |
| S17-final-viral-combined_k141_80127   | [full]       | 2209  | No  | NA | 0    | 4  | Not-determined | Genome-fragment | NA    | 0     |
| S17-final-viral-combined_k141_113131  | [full]       | 3074  | No  | NA | 0    | 1  | Not-determined | Genome-fragment | NA    | 0     |
| S17-final-viral-combined_k141_1950    | [full]       | 2840  | No  | NA | 0    | 2  | Not-determined | Genome-fragment | NA    | 0     |
| S5_k141_149127                        | [full]       | 2118  | No  | NA | 4    | 0  | Low-quality    | Genome-fragment | 5.25  | 0     |
| S7-final-viral-combined_k141_41868    | [full]       | 2118  | No  | NA | 0    | 1  | Low-quality    | Genome-fragment | 1.62  | 0     |
| S17-final-viral-combined_k141_45893   | [full]       | 9258  | No  | NA | 0    | 1  | Not-determined | Genome-fragment | NA    | 0     |
| S17-final-viral-combined_k141_202424  | [full]       | 1218  | No  | NA | 0    | 2  | Not-determined | Genome-fragment | NA    | 0     |
| S7_k141_76682                         | [full]       | 2118  | No  | NA | 0    | 1  | Low-quality    | Genome-fragment | 0.91  | 0     |
| S17-final-viral-combined_k141_45898   | [full]       | 2118  | No  | NA | 0    | 0  | Not-determined | Genome-fragment | NA    | 0     |
| S17-final-viral-combined_k141_235038  | [full]       | 2100  | No  | NA | 0    | 3  | Not-determined | Genome-fragment | NA    | 0     |
| S17-final-viral-combined_k141_101703  | [full]       | 1977  | No  | NA | 0    | 1  | Not-determined | Genome-fragment | NA    | 0     |
| S17-final-viral-combined_k141_129795  | [full]       | 1418  | No  | NA | 0    | 1  | Low-quality    | Genome-fragment | 3.92  | 0     |
| S17-final-viral-combined_k141_90547   | [full]       | 1452  | No  | NA | 0    | 1  | Not-determined | Genome-fragment | NA    | 0     |
| S11-final-viral-combined_k141_245271  | [full]       | 2119  | No  | NA | 0    | 0  | Low-quality    | Genome-fragment | 2.37  | 0     |
| S17-final-viral-combined_k141_246020  | [full]       | 7577  | No  | NA | 0    | 0  | Not-determined | Genome-fragment | NA    | 0     |
| S11_k141_33211                        | [full]       | 2119  | No  | NA | 0    | 0  | Low-quality    | Genome-fragment | 1.14  | 0     |
| S17-final-viral-combined_k141_235056  | [full]       | 1762  | No  | NA | 0    | 1  | Not-determined | Genome-fragment | NA    | 0     |
| S2_k141_1459                          | [full]       | 2119  | No  | NA | 2    | 0  | Low-quality    | Genome-fragment | 4.67  | 0     |
| S4_k141_109016                        | [full]       | 2119  | No  | NA | 0    | 1  | Low-quality    | Genome-fragment | 4.43  | 0     |
| S11-final-viral-combined_k141_62092   | [full]       | 2120  | No  | NA | 3    | 0  | Low-quality    | Genome-fragment | 4.77  | 0     |
| S11-final-viral-combined_k141_260911  | [full]       | 2120  | No  | NA | 2    | 0  | Low-quality    | Genome-fragment | 4.61  | 0     |
| S17-final-viral-combined_k141_224498  | [full]       | 1844  | No  | NA | 0    | 0  | Not-determined | Genome-fragment | NA    | 0     |
| S17-final-viral-combined_k141_35285   | [full]       | 1316  | No  | NA | 0    | 1  | Not-determined | Genome-fragment | NA    | 0     |
| S1-final-viral-combined_k141_107161   | [full]       | 2120  | No  | NA | 0    | 0  | Low-quality    | Genome-fragment | 3.55  | 0     |
| S17-final-viral-combined_k141_101760  | [full]       | 1650  | No  | NA | 0    | 1  | Not-determined | Genome-fragment | NA    | 0     |
| S17-final-viral-combined_k141_246070  | [full]       | 2262  | No  | NA | 0    | 0  | Not-determined | Genome-fragment | NA    | 0     |
| S17-final-viral-combined_k141_179771  | [full]       | 43075 | No  | NA | 3    | 3  | High-quality   | High-quality    | 97.43 | 0     |
| S1_k141_40270                         | [full]       | 2120  | No  | NA | 1    | 1  | Low-quality    | Genome-fragment | 1.6   | 0     |
| S17-final-viral-combined_k141_235110  | [full]       | 1601  | No  | NA | 0    | 0  | Not-determined | Genome-fragment | NA    | 0     |
| S3_k141                               |              |       |     |    |      |    |                |                 |       |       |



|                                      |       |     |       |    |    |                |                 |       |       |
|--------------------------------------|-------|-----|-------|----|----|----------------|-----------------|-------|-------|
| S12_k141_170157                      | 2123  | Yes | 1631  | 2  | 1  | Low-quality    | Genome-fragment | 2     | 23.17 |
| S9-final-viral-combined_k141_225211  | 2125  | No  | NA    | 1  | 0  | Low-quality    | Genome-fragment | 4.01  | 0     |
| S2-final-viral-combined_k141_196152  | 2125  | No  | NA    | 0  | 0  | Low-quality    | Genome-fragment | 6     | 0     |
| S4-final-viral-combined_k141_69820   | 2125  | No  | NA    | 0  | 0  | Low-quality    | Genome-fragment | 1.18  | 0     |
| S4-final-viral-combined_k141_118521  | 2125  | No  | NA    | 0  | 0  | Low-quality    | Genome-fragment | 3.83  | 0     |
| S17-final-viral-combined_k141_124531 | 3317  | No  | NA    | 0  | 3  | Not-determined | Genome-fragment | NA    | 0     |
| S17-final-viral-combined_k141_168821 | 6042  | No  | NA    | 0  | 6  | Not-determined | Genome-fragment | NA    | 0     |
| S8-final-viral-combined_k141_20362   | 2125  | Yes | 1597  | 1  | 1  | Low-quality    | Genome-fragment | 4.25  | 24.85 |
| S11-final-viral-combined_k141_204451 | 2126  | No  | NA    | 0  | 0  | Low-quality    | Genome-fragment | 1.01  | 0     |
| S7-final-viral-combined_k141_198635  | 2126  | No  | NA    | 1  | 0  | Low-quality    | Genome-fragment | 2.46  | 0     |
| S17-final-viral-combined_k141_146671 | 3605  | No  | NA    | 0  | 0  | Not-determined | Genome-fragment | NA    | 0     |
| S7-final-viral-combined_k141_244624  | 2126  | No  | NA    | 0  | 0  | Low-quality    | Genome-fragment | NA    | 4.5   |
| S17-final-viral-combined_k141_12708  | 1264  | No  | NA    | 2  | 1  | Not-determined | Genome-fragment | NA    | 0     |
| S12-final-viral-combined_k141_312952 | 2126  | No  | NA    | 0  | 2  | Low-quality    | Genome-fragment | 1.71  | 0     |
| S17-final-viral-combined_k141_213582 | 4240  | No  | NA    | 0  | 2  | Not-determined | Genome-fragment | NA    | 3.33  |
| S12_k141_312882                      | 2127  | No  | NA    | 0  | 0  | Low-quality    | Genome-fragment | 5.26  | 0     |
| S11_k141_326684                      | 2128  | No  | NA    | 3  | 0  | Low-quality    | Genome-fragment | NA    | 0     |
| S17-final-viral-combined_k141_257688 | 2311  | No  | NA    | 0  | 1  | Not-determined | Genome-fragment | NA    | 0     |
| S17-final-viral-combined_k141_21641  | 1389  | No  | NA    | 0  | 1  | Not-determined | Genome-fragment | NA    | 0     |
| S7-final-viral-combined_k141_39707   | 2128  | No  | NA    | 0  | 2  | Low-quality    | Genome-fragment | 4.05  | 0     |
| S17-final-viral-combined_k141_9068   | 1627  | No  | NA    | 0  | 1  | Not-determined | Genome-fragment | NA    | 4.75  |
| S12-final-viral-combined_k141_289567 | 2128  | No  | NA    | 1  | 0  | Low-quality    | Genome-fragment | NA    | 0     |
| S12-final-viral-combined_k141_216163 | 2128  | No  | NA    | 0  | 2  | Low-quality    | Genome-fragment | 0.95  | 0     |
| S17-final-viral-combined_k141_124611 | 3534  | No  | NA    | 0  | 2  | Not-determined | Genome-fragment | NA    | 0     |
| S2_k141_2433                         | 2128  | No  | NA    | 0  | 1  | Low-quality    | Genome-fragment | 2.05  | 0     |
| S17-final-viral-combined_k141_157501 | 2551  | No  | NA    | 0  | 2  | Not-determined | Genome-fragment | NA    | 0     |
| S11-final-viral-combined_k141_57518  | 2129  | No  | NA    | 1  | 0  | Low-quality    | Genome-fragment | 2.79  | 0     |
| S12-final-viral-combined_k141_124560 | 2129  | No  | NA    | 1  | 0  | Low-quality    | Genome-fragment | 3.47  | 0     |
| S12-final-viral-combined_k141_261451 | 2129  | No  | NA    | 0  | 0  | Low-quality    | Genome-fragment | 3.61  | 0     |
| S17-final-viral-combined_k141_146700 | 3380  | No  | NA    | 0  | 0  | Not-determined | Genome-fragment | NA    | 0     |
| S17-final-viral-combined_k141_103903 | 2754  | No  | NA    | 0  | 2  | Not-determined | Genome-fragment | NA    | 0     |
| S17-final-viral-combined_k141_24667  | 3149  | No  | NA    | 0  | 3  | Not-determined | Genome-fragment | NA    | 0     |
| S17-final-viral-combined_k141_146711 | 3108  | No  | NA    | 0  | 2  | Not-determined | Genome-fragment | NA    | 0     |
| S17-final-viral-combined_k141_24079  | 2092  | No  | NA    | 0  | 2  | Not-determined | Genome-fragment | NA    | 0     |
| S2-final-viral-combined_k141_34516   | 2129  | No  | NA    | 0  | 0  | Low-quality    | Genome-fragment | 2.72  | 0     |
| S17-final-viral-combined_k141_191263 | 4446  | No  | NA    | 0  | 4  | Not-determined | Genome-fragment | NA    | 0     |
| S17-final-viral-combined_k141_168877 | 4035  | No  | NA    | 0  | 3  | Not-determined | Genome-fragment | NA    | 0     |
| S2-final-viral-combined_k141_225923  | 2129  | No  | NA    | 0  | 1  | Low-quality    | Genome-fragment | 3.86  | 0     |
| S17-final-viral-combined_k141_257743 | 3753  | No  | NA    | 0  | 0  | Not-determined | Genome-fragment | NA    | 0     |
| S12-final-viral-combined_k141_379751 | 2130  | No  | NA    | 0  | 0  | Low-quality    | Genome-fragment | 2.52  | 0     |
| S11-final-viral-combined_k141_223325 | 2131  | No  | NA    | 0  | 1  | Low-quality    | Genome-fragment | 1.68  | 0     |
| S5-final-viral-combined_k141_389608  | 2131  | No  | NA    | 0  | 0  | Low-quality    | Genome-fragment | 2.73  | 0     |
| S17-final-viral-combined_k141_213646 | 2575  | No  | NA    | 0  | 2  | Not-determined | Genome-fragment | NA    | 0     |
| S17-final-viral-combined_k141_113744 | 1151  | No  | NA    | 0  | 1  | Not-determined | Genome-fragment | NA    | 0     |
| S17-final-viral-combined_k141_202790 | 2131  | No  | NA    | 0  | 0  | Low-quality    | Genome-fragment | 1.56  | 0     |
| S17-final-viral-combined_k141_353551 | 2051  | No  | NA    | 0  | 1  | Not-determined | Genome-fragment | NA    | 0     |
| S8-final-viral-combined_k141_205317  | 2131  | No  | NA    | 0  | 0  | Low-quality    | Genome-fragment | 5.31  | 0     |
| S17-final-viral-combined_k141_202741 | 1395  | No  | NA    | 0  | 2  | Not-determined | Genome-fragment | NA    | 0     |
| S5-final-viral-combined_k141_87495   | 2132  | No  | NA    | 0  | 0  | Low-quality    | Genome-fragment | NA    | 4.5   |
| S17-final-viral-combined_k141_135731 | 1249  | No  | NA    | 0  | 0  | Not-determined | Genome-fragment | NA    | 0     |
| S17-final-viral-combined_k141_46108  | 1139  | No  | NA    | 0  | 0  | Not-determined | Genome-fragment | NA    | 0     |
| S5-final-viral-combined_k141_163945  | 2132  | No  | NA    | 0  | 2  | Not-determined | Genome-fragment | NA    | 4.75  |
| S17-final-viral-combined_k141_46115  | 1071  | No  | NA    | 1  | 2  | Not-determined | Genome-fragment | NA    | 0     |
| S17-final-viral-combined_k141_213668 | 1337  | No  | NA    | 0  | 1  | Not-determined | Genome-fragment | NA    | 0     |
| S17-final-viral-combined_k141_235374 | 3644  | No  | NA    | 0  | 2  | Not-determined | Genome-fragment | NA    | 0     |
| S17-final-viral-combined_k141_157526 | 1999  | No  | NA    | 0  | 2  | Not-determined | Genome-fragment | NA    | 0     |
| S17-final-viral-combined_k141_257777 | 1509  | No  | NA    | 0  | 1  | Not-determined | Genome-fragment | NA    | 0     |
| S17-final-viral-combined_k141_235381 | 2769  | No  | NA    | 0  | 1  | Not-determined | Genome-fragment | NA    | 0     |
| S17-final-viral-combined_k141_213677 | 1491  | No  | NA    | 0  | 2  | Not-determined | Genome-fragment | NA    | 0     |
| S17-final-viral-combined_k141_146753 | 1228  | No  | NA    | 0  | 3  | Not-determined | Genome-fragment | NA    | 0     |
| S17-final-viral-combined_k141_202770 | 2684  | No  | NA    | 0  | 0  | Not-determined | Genome-fragment | NA    | 0     |
| S17-final-viral-combined_k141_272101 | 2132  | No  | NA    | 0  | 0  | Low-quality    | Genome-fragment | 3.07  | 0     |
| S17-final-viral-combined_k141_124746 | 2603  | No  | NA    | 0  | 1  | Not-determined | Genome-fragment | NA    | 0     |
| S17-final-viral-combined_k141_135767 | 1786  | No  | NA    | 0  | 2  | Not-determined | Genome-fragment | NA    | 0     |
| S4_k141_24732                        | 2132  | No  | NA    | 0  | 1  | Low-quality    | Genome-fragment | 0.75  | 0     |
| S6-final-viral-combined_k141_89185   | 2132  | No  | NA    | 0  | 3  | Low-quality    | Genome-fragment | 1.59  | 0     |
| S12_k141_48294                       | 2133  | No  | NA    | 0  | 1  | Low-quality    | Genome-fragment | 2.88  | 0     |
| S17-final-viral-combined_k141_35604  | 1387  | No  | NA    | 0  | 2  | Not-determined | Genome-fragment | NA    | 1.99  |
| S9-final-viral-combined_k141_118920  | 2134  | No  | NA    | 0  | 1  | Low-quality    | Genome-fragment | NA    | 0     |
| S3-final-viral-combined_k141_70230   | 2134  | No  | NA    | 0  | 0  | Low-quality    | Genome-fragment | 2.38  | 0     |
| S17-final-viral-combined_k141_224722 | 4838  | No  | NA    | 0  | 0  | Not-determined | Genome-fragment | NA    | 0     |
| S17-final-viral-combined_k141_90829  | 2075  | No  | NA    | 0  | 1  | Not-determined | Genome-fragment | NA    | 0     |
| S12-final-viral-combined_k141_370664 | 2134  | No  | NA    | 0  | 0  | Low-quality    | Genome-fragment | 6.62  | 0     |
| S17-final-viral-combined_k141_224762 | 9820  | No  | NA    | 0  | 2  | Not-determined | Genome-fragment | NA    | 0     |
| S17-final-viral-combined_k141_11383  | 2636  | No  | NA    | 0  | 2  | Not-determined | Genome-fragment | NA    | 0     |
| S17-final-viral-combined_k141_235451 | 2620  | No  | NA    | 0  | 2  | Not-determined | Genome-fragment | NA    | 0     |
| S17-final-viral-combined_k141_22341  | 70511 | Yes | 5504  | 22 | 12 | High-quality   | High-quality    | 100   | 21.99 |
| S17-final-viral-combined_k141_169026 | 1847  | No  | NA    | 0  | 0  | Not-determined | Genome-fragment | NA    | 0     |
| S2_k141_236000                       | 2134  | No  | NA    | 0  | 0  | Low-quality    | Genome-fragment | 3.59  | 0     |
| S17-final-viral-combined_k141_246314 | 2129  | No  | NA    | 0  | 2  | Not-determined | Genome-fragment | NA    | 0     |
| S17-final-viral-combined_k141_191357 | 1347  | No  | NA    | 0  | 1  | Not-determined | Genome-fragment | NA    | 0     |
| S17-final-viral-combined_k141_091561 | 2795  | No  | NA    | 0  | 2  | Not-determined | Genome-fragment | NA    | 0     |
| S11-final-viral-combined_k141_42956  | 2135  | No  | NA    | 0  | 0  | Low-quality    | Genome-fragment | 1.84  | 0     |
| S17-final-viral-combined_k141_213724 | 2500  | No  | NA    | 0  | 2  | Not-determined | Genome-fragment | NA    | 0     |
| S17-final-viral-combined_k141_146824 | 2441  | No  | NA    | 0  | 2  | Not-determined | Genome-fragment | NA    | 0     |
| S11_k141_259751                      | 2135  | No  | NA    | 0  | 3  | Low-quality    | Genome-fragment | 0.86  | 0     |
| S17-final-viral-combined_k141_224840 | 2866  | No  | NA    | 0  | 0  | Not-determined | Genome-fragment | NA    | 0     |
| S2_k141_371633                       | 2135  | No  | NA    | 0  | 0  | Low-quality    | Genome-fragment | 4.03  | 0     |
| S17-final-viral-combined_k141_191382 | 10524 | No  | NA    | 0  | 1  | Not-determined | Genome-fragment | NA    | 0     |
| S17-final-viral-combined_k141_213743 | 2891  | No  | NA    | 0  | 1  | Not-determined | Genome-fragment | NA    | 0     |
| S17-final-viral-combined_k141_257825 | 1129  | No  | NA    | 0  | 1  | Not-determined | Genome-fragment | NA    | 0     |
| S17-final-viral-combined_k141_102034 | 1657  | No  | NA    | 0  | 1  | Not-determined | Genome-fragment | NA    | 0     |
| S17-final-viral-combined_k141_202847 | 2238  | No  | NA    | 0  | 1  | Not-determined | Genome-fragment | NA    | 0     |
| S17-final-viral-combined_k141_201212 | 2135  | No  | NA    | 0  | 3  | Low-quality    | Genome-fragment | 0.67  | 0     |
| S17-final-viral-combined_k141_180231 | 1463  | No  | NA    | 0  | 1  | Not-determined | Genome-fragment | NA    | 0     |
| S17-final-viral-combined_k141_246368 | 3483  | No  | NA    | 0  | 3  | Not-determined | Genome-fragment | NA    | 0     |
| S2-final-viral-combined_k141_15148   | 2135  | No  | NA    | 2  | 0  | Low-quality    | Genome-fragment | 1.52  | 0     |
| S17-final-viral-combined_k141_157610 | 4335  | No  | NA    | 0  | 1  | Not-determined | Genome-fragment | NA    | 1.52  |
| S17-final-viral-combined_k141_144850 | 13605 | Yes | 10278 | 0  | 1  | Medium-quality | Genome-fragment | 66.51 | 23.07 |
| S2-final-viral-combined_k141_245383  | 2135  | No  | NA    | 0  | 2  | Low-quality    | Genome-fragment | 2.6   | 0     |
| S8-final-viral-combined_k141_88151   | 2135  | No  | NA    | 1  | 0  | Low-quality    | Genome-fragment | 1.04  | 0     |
| S11-final-viral-combined_k141_213228 | 2136  | No  | NA    | 0  | 0  | Low-quality    | Genome-fragment | 1.15  | 0     |
| S17-final-viral-combined_k141_124963 | 1548  | No  | NA    | 0  | 0  | Not-determined | Genome-fragment | NA    | 0     |
| S17-final-viral-combined_k141_102080 | 1857  | No  | NA    | 0  | 2  | Not-determined | Genome-fragment | NA    | 0     |
| S17-final-viral-combined_k141_57851  | 14839 | No  | NA    | 0  | 2  | Not-determined | Genome-fragment | NA    | 0     |
| S17-final-viral-combined_k141_24294  | 4320  | No  | NA    | 0  | 2  | Not-determined | Genome-fragment | NA    | 0     |
| S17-final-viral-combined_k141_12283  | 1656  | No  | NA    | 0  | 1  | Not-determined | Genome-fragment | NA    | 0     |
| S2-final-viral-combined_k141_52822   | 2136  | No  | NA    | 0  | 0  | Low-quality    | Genome-fragment | 3.24  | 0     |
| S17-final-viral-combined_k141_90912  | 1136  | No  | NA    | 0  | 0  | Not-determined | Genome-fragment | NA    | 0     |
| S17-final-viral-combined_k141_113974 | 1939  | No  | NA    | 0  | 2  | Not-determined | Genome-fragment | NA    | 0     |
| S17-final-viral-combined_k141_09263  | 4482  | No  | NA    | 0  | 2  | Not-determined | Genome-fragment | NA    | 0     |
| S5-final-viral-combined_k141_60347   | 2136  | No  | NA    | 0  | 0  | Low-quality    | Genome-fragment | 3.23  | 0     |
| S17-final-viral-combined_k141_224927 | 1332  | No  | NA    | 0  | 1  | Not-determined | Genome-fragment | NA    | 0     |
| S17-final-viral-combined_k141_113989 | 4458  | No  | NA    | 0  | 2  | Not-determined | Genome-fragment | NA    | 0     |
| S17-final-viral-combined_k141_113990 | 2627  | No  | NA    | 0  | 2  | Not-determined | Genome-fragment | NA    | 0     |
| S17-final-viral-combined_k141_235587 | 2350  | No  | NA    | 0  | 2  | Not-determined | Genome-fragment | NA    | 0     |
| S17-final-viral-combined_k141_90993  | 2136  | No  | NA    | 0  | 0  | Low-quality    | Genome-fragment | 4.1   | 0     |
| S17-final-viral-combined_k141_12953  | 1641  | No  | NA    | 0  | 2  | Not-determined | Genome-fragment | NA    | 0     |
| S17-final-viral-combined_k141_134413 | 2136  | No  | NA    | 2  | 0  | Low-quality    | Genome-fragment | 5.05  | 0     |
| S17-final-viral-combined_k141_46218  | 1168  | No  | NA    | 0  | 0  | Not-determined | Genome-fragment | NA    | 0     |
| S12-final-viral-combined_k141_102092 | 2136  | No  | NA    | 0  | 1  | Low-quality    | Genome-fragment | 0.61  | 0     |
| S2-final-viral-combined_k141_103851  | 2136  | No  | NA    | 0  | 0  | Low-quality    | Genome-fragment | NA    | 5.31  |
| S2-final-viral-combined_k141_113610  | 2136  | No  | NA    | 0  | 2  | Low-quality    | Genome-fragment | 1.3   | 0     |
| S17-final-viral-combined_k141_246451 | 6070  | No  | NA    | 0  | 5  | Not-determined | Genome-fragment | NA    | 0     |
| S5-final-viral-combined_k141_119316  | 2137  | No  | NA    | 0  | 0  | Low-quality    | Genome-fragment | 2.5   | 0     |
| S12-final-viral-combined_k141_170934 | 2137  | No  | NA    | 1  | 0  | Low-quality    | Genome-fragment | 2.27  | 0     |
| S17-final-viral-combined_k141_35690  | 2677  | No  | NA    | 0  | 0  | Not-determined | Genome-fragment | NA    | 0     |
| S17-final-viral-combined_k141_23277  | 2294  | No  | NA    | 0  | 0  | Not-determined | Genome-fragment | NA    | 0     |
| S17-final-viral-combined_k141_224988 | 2018  | No  | NA    | 0  | 0  | Not-determined | Genome-fragment | NA    | 0     |
| S2-final-viral-combined_k141_7361    | 2137  | No  | NA    | 0  | 2  | Low-quality    | Genome-fragment | 1.14  | 0     |
| S17-final-viral-combined_k141_257999 | 4265  | No  | NA    | 0  | 2  | Not-determined | Genome-fragment | NA    | 3.73  |
| S9-final-viral-combined_k141_36214   | 2138  | No  | NA    | 0  | 0  | Low-quality    | Genome-fragment | NA    | 2.6   |
| S17-final-viral-combined_k141_28586  | 2138  | No  | NA    | 0  | 0  | Low-quality    | Genome-fragment | NA    | 0     |
| S17-final-viral-combined_k141_90990  | 5745  | No  | NA    | 0  | 2  | Not-determined | Genome-fragment | NA    | 2.3   |
| S12-final-viral-combined_k141_236462 | 2138  | No  | NA    | 0  | 1  | Low-quality    | Genome-fragment | 3.86  | 0     |
| S12_k141_69600                       | 2138  | No  | NA    | 2  | 0  | Low-quality    | Genome-fragment | NA    | 0     |
| S11-final-viral-combined_k141_182862 | 2139  | No  | NA    | 1  | 0  | Low-quality    | Genome-fragment | 4.49  | 0     |
| S17-final-viral-combined             |       |     |       |    |    |                |                 |       |       |



|                                      |        |       |     |      |    |   |                |                   |                 |       |   |
|--------------------------------------|--------|-------|-----|------|----|---|----------------|-------------------|-----------------|-------|---|
| S17-final-viral-combined_k141_102252 | [full] | 6143  | No  | NA   | 0  | 5 | Not-determined | Genome-fragment   | NA              | 0     |   |
| S3-final-viral-combined_k141_112065  | [full] | 2143  | No  | NA   | 0  | 1 | Low-quality    | Genome-fragment   | 1.84            | 0     |   |
| S4-final-viral-combined_k141_10239   | [full] | 2143  | No  | NA   | 0  | 0 | Low-quality    | Genome-fragment   | 7.24            | 0     |   |
| S3-final-viral-combined_k141_120696  | [full] | 2144  | Yes | 1067 | 1  | 1 | Low-quality    | Genome-fragment   | 0.64            | 50.23 |   |
| S17-final-viral-combined_k141_80689  | [full] | 2057  | No  | NA   | 0  | 1 | Not-determined | Genome-fragment   | NA              | 0     |   |
| S17-final-viral-combined_k141_147166 | [full] | 2255  | No  | NA   | 0  | 2 | Not-determined | Genome-fragment   | NA              | 0     |   |
| S7-final-viral-combined_k141_35684   | [full] | 2144  | No  | NA   | 0  | 2 | Low-quality    | Genome-fragment   | 3.66            | 0     |   |
| S17-final-viral-combined_k141_191662 | [full] | 1152  | No  | NA   | 0  | 0 | Not-determined | Genome-fragment   | NA              | 0     |   |
| S7-final-viral-combined_k141_179781  | [full] | 2144  | No  | NA   | 0  | 0 | Low-quality    | Genome-fragment   | 3.46            | 0     |   |
| S17-final-viral-combined_k141_169354 | [full] | 1236  | No  | NA   | 0  | 0 | Not-determined | Genome-fragment   | NA              | 0     |   |
| S17-final-viral-combined_k141_180420 | [full] | 4283  | No  | NA   | 0  | 3 | Not-determined | Genome-fragment   | NA              | 0     |   |
| S12_k141_52078                       | [full] | 2144  | No  | NA   | 0  | 0 | Low-quality    | Genome-fragment   | 1.29            | 0     |   |
| S2_k141_92498                        | [full] | 2144  | No  | NA   | 0  | 1 | Low-quality    | Genome-fragment   | 7.21            | 0     |   |
| S17-final-viral-combined_k141_147191 | [full] | 1845  | No  | NA   | 0  | 3 | Not-determined | Genome-fragment   | NA              | 0     |   |
| S17-final-viral-combined_k141_13117  | [full] | 1606  | No  | NA   | 0  | 2 | Not-determined | Genome-fragment   | NA              | 0     |   |
| S17-final-viral-combined_k141_157700 | [full] | 2504  | No  | NA   | 0  | 4 | Not-determined | Genome-fragment   | NA              | 0     |   |
| S17-final-viral-combined_k141_191680 | [full] | 4008  | No  | NA   | 0  | 2 | Not-determined | Genome-fragment   | NA              | 0     |   |
| S17-final-viral-combined_k141_136055 | [full] | 5350  | No  | NA   | 0  | 5 | Not-determined | Genome-fragment   | NA              | 0     |   |
| S17-final-viral-combined_k141_59488  | [full] | 2512  | No  | NA   | 0  | 0 | Not-determined | Genome-fragment   | NA              | 0     |   |
| S17-final-viral-combined_k141_235838 | [full] | 5853  | No  | NA   | 0  | 4 | Not-determined | Genome-fragment   | NA              | 0     |   |
| S8-final-viral-combined_k141_208037  | [full] | 2144  | No  | NA   | 0  | 0 | Low-quality    | Genome-fragment   | 3.23            | 0     |   |
| S17-final-viral-combined_k141_235851 | [full] | 2518  | No  | NA   | 0  | 1 | Not-determined | Genome-fragment   | NA              | 0     |   |
| S17-final-viral-combined_k141_258153 | [full] | 1631  | No  | NA   | 0  | 1 | Not-determined | Genome-fragment   | NA              | 0     |   |
| S17-final-viral-combined_k141_125117 | [full] | 4189  | No  | NA   | 0  | 1 | Not-determined | Genome-fragment   | NA              | 0     |   |
| S17-final-viral-combined_k141_125118 | [full] | 3315  | No  | NA   | 0  | 4 | Not-determined | Genome-fragment   | NA              | 0     |   |
| S17-final-viral-combined_k141_214109 | [full] | 6571  | No  | NA   | 0  | 4 | Not-determined | Genome-fragment   | NA              | 0     |   |
| S17-final-viral-combined_k141_169428 | [full] | 1482  | No  | NA   | 0  | 0 | Not-determined | Genome-fragment   | NA              | 0     |   |
| S17-final-viral-combined_k141_24403  | [full] | 1207  | No  | NA   | 0  | 2 | Not-determined | Genome-fragment   | NA              | 0     |   |
| S17-final-viral-combined_k141_136107 | [full] | 2683  | No  | NA   | 0  | 0 | Not-determined | Genome-fragment   | NA              | 0     |   |
| S17-final-viral-combined_k141_258185 | [full] | 2408  | No  | NA   | 0  | 3 | Not-determined | Genome-fragment   | NA              | 0     |   |
| S9-final-viral-combined_k141_66133   | [full] | 2145  | No  | NA   | 4  | 0 | Low-quality    | Genome-fragment   | 5.73            | 0     |   |
| S17-final-viral-combined_k141_258186 | [full] | 1720  | No  | NA   | 0  | 1 | Not-determined | Genome-fragment   | NA              | 0     |   |
| S17-final-viral-combined_k141_235889 | [full] | 1366  | No  | NA   | 0  | 1 | Not-determined | Genome-fragment   | NA              | 0     |   |
| S17-final-viral-combined_k141_102365 | [full] | 1445  | No  | NA   | 0  | 1 | Not-determined | Genome-fragment   | NA              | 0     |   |
| S17-final-viral-combined_k141_246657 | [full] | 1307  | No  | NA   | 0  | 2 | Not-determined | Genome-fragment   | NA              | 0     |   |
| S17-final-viral-combined_k141_147451 | [full] | 2740  | No  | NA   | 0  | 1 | Not-determined | Genome-fragment   | NA              | 0     |   |
| S3-final-viral-combined_k141_90136   | [full] | 2145  | No  | NA   | 1  | 0 | Low-quality    | Genome-fragment   | 5.1             | 0     |   |
| S17-final-viral-combined_k141_114388 | [full] | 1217  | No  | NA   | 0  | 1 | Not-determined | Genome-fragment   | NA              | 0     |   |
| S5-final-viral-combined_k141_70187   | [full] | 2145  | No  | NA   | 0  | 0 | Low-quality    | Genome-fragment   | 4.81            | 0     |   |
| S17-final-viral-combined_k141_246671 | [full] | 1291  | No  | NA   | 1  | 0 | 1              | Not-determined    | Genome-fragment | NA    | 0 |
| S17-final-viral-combined_k141_180504 | [full] | 1125  | No  | NA   | 0  | 1 | Not-determined | Genome-fragment   | NA              | 0     |   |
| S17-final-viral-combined_k141_214121 | [full] | 1614  | No  | NA   | 0  | 1 | Not-determined | Genome-fragment   | NA              | 0     |   |
| S17-final-viral-combined_k141_169492 | [full] | 7673  | No  | NA   | 0  | 2 | Not-determined | Genome-fragment   | NA              | 0     |   |
| S7-final-viral-combined_k141_317741  | [full] | 2145  | No  | NA   | 0  | 2 | Low-quality    | Genome-fragment   | 1.75            | 0     |   |
| S17-final-viral-combined_k141_24459  | [full] | 2161  | No  | NA   | 0  | 0 | Not-determined | Genome-fragment   | NA              | 0     |   |
| S7-final-viral-combined_k141_138031  | [full] | 2145  | No  | NA   | 0  | 0 | Low-quality    | Genome-fragment   | 5.75            | 0     |   |
| S17-final-viral-combined_k141_214158 | [full] | 2102  | No  | NA   | 0  | 2 | Not-determined | Genome-fragment   | NA              | 0     |   |
| S17-final-viral-combined_k141_225219 | [full] | 2157  | No  | NA   | 0  | 2 | Not-determined | Genome-fragment   | NA              | 0     |   |
| S17-final-viral-combined_k141_46496  | [full] | 376   | No  | NA   | 0  | 3 | Not-determined | Genome-fragment   | NA              | 0     |   |
| S7-final-viral-combined_k141_224373  | [full] | 2145  | No  | NA   | 1  | 0 | Low-quality    | Genome-fragment   | 3.82            | 0     |   |
| S12-final-viral-combined_k141_87756  | [full] | 2145  | No  | NA   | 0  | 0 | Low-quality    | Genome-fragment   | 4.08            | 0     |   |
| S1-final-viral-combined_k141_235557  | [full] | 2146  | No  | NA   | 0  | 2 | Low-quality    | Genome-fragment   | 1.77            | 0     |   |
| S17-final-viral-combined_k141_246728 | [full] | 1562  | No  | NA   | 0  | 0 | Not-determined | Genome-fragment   | NA              | 0     |   |
| S1-final-viral-combined_k141_197214  | [full] | 2146  | No  | NA   | 1  | 0 | Low-quality    | Genome-fragment   | 5.41            | 0     |   |
| S12-final-viral-combined_k141_140023 | [full] | 2146  | No  | NA   | 1  | 0 | Low-quality    | Genome-fragment   | 0.99            | 0     |   |
| S17-final-viral-combined_k141_35955  | [full] | 4662  | No  | NA   | 0  | 2 | Not-determined | Genome-fragment   | NA              | 0     |   |
| S17-final-viral-combined_k141_24508  | [full] | 3368  | No  | NA   | 0  | 4 | Not-determined | Genome-fragment   | NA              | 0     |   |
| S11-final-viral-combined_k141_311381 | [full] | 2147  | No  | NA   | 1  | 0 | Low-quality    | Genome-fragment   | 1.43            | 0     |   |
| S17-final-viral-combined_k141_157841 | [full] | 6475  | No  | NA   | 0  | 4 | Not-determined | Genome-fragment   | NA              | 0     |   |
| S17-final-viral-combined_k141_214239 | [full] | 1052  | No  | NA   | 0  | 0 | Not-determined | Genome-fragment   | NA              | 0     |   |
| S17-final-viral-combined_k141_80837  | [full] | 1549  | No  | NA   | 0  | 1 | Not-determined | Genome-fragment   | NA              | 0     |   |
| S5-final-viral-combined_k141_412444  | [full] | 2147  | No  | NA   | 0  | 0 | Low-quality    | Genome-fragment   | 5.52            | 0     |   |
| S17-final-viral-combined_k141_58082  | [full] | 1430  | No  | NA   | 0  | 2 | Not-determined | Genome-fragment   | NA              | 0     |   |
| S17-final-viral-combined_k141_258267 | [full] | 14318 | No  | NA   | 0  | 1 | Not-determined | Genome-fragment   | NA              | 0     |   |
| S17-final-viral-combined_k141_180606 | [full] | 1288  | No  | NA   | 0  | 1 | Not-determined | Genome-fragment   | NA              | 0     |   |
| S17-final-viral-combined_k141_102410 | [full] | 6575  | No  | NA   | 0  | 0 | Not-determined | Genome-fragment   | NA              | 0     |   |
| S17-final-viral-combined_k141_2599   | [full] | 5245  | No  | NA   | 0  | 3 | Not-determined | Genome-fragment   | NA              | 0     |   |
| S2_k141_196947                       | [full] | 2147  | No  | NA   | 0  | 0 | Low-quality    | Genome-fragment   | 3.1             | 0     |   |
| S8_k141_245408                       | [full] | 2147  | No  | NA   | 0  | 0 | Low-quality    | Genome-fragment   | 6.67            | 0     |   |
| S17-final-viral-combined_k141_13308  | [full] | 1576  | No  | NA   | 0  | 1 | Not-determined | Genome-fragment   | NA              | 0     |   |
| S1-final-viral-combined_k141_264420  | [full] | 2148  | No  | NA   | 0  | 0 | Low-quality    | Genome-fragment   | 4.98            | 0     |   |
| S17-final-viral-combined_k141_157871 | [full] | 3382  | No  | NA   | 0  | 2 | Not-determined | Genome-fragment   | NA              | 0     |   |
| S1-final-viral-combined_k141_332614  | [full] | 2148  | No  | NA   | 0  | 0 | Low-quality    | Genome-fragment   | 6               | 0     |   |
| S17-final-viral-combined_k141_102431 | [full] | 2075  | No  | NA   | 0  | 2 | Not-determined | Genome-fragment   | NA              | 0     |   |
| S1-final-viral-combined_k141_174212  | [full] | 2148  | No  | NA   | 1  | 1 | Low-quality    | Genome-fragment   | 0.8             | 0     |   |
| S17-final-viral-combined_k141_58129  | [full] | 1452  | No  | NA   | 0  | 2 | Not-determined | Genome-fragment   | NA              | 0     |   |
| S17-final-viral-combined_k141_102440 | [full] | 7933  | No  | NA   | 0  | 7 | Not-determined | Genome-fragment   | NA              | 0     |   |
| S5-final-viral-combined_k141_128974  | [full] | 2148  | No  | NA   | 0  | 0 | Low-quality    | Genome-fragment   | 6.01            | 0     |   |
| S17-final-viral-combined_k141_68941  | [full] | 2148  | No  | NA   | 0  | 0 | Low-quality    | Genome-fragment   | 3.61            | 0     |   |
| S12-final-viral-combined_k141_391609 | [full] | 2148  | No  | NA   | 0  | 0 | Low-quality    | Genome-fragment   | 1.61            | 0     |   |
| S17-final-viral-combined_k141_102468 | [full] | 1341  | No  | NA   | 0  | 1 | Not-determined | Genome-fragment   | NA              | 0     |   |
| S17-final-viral-combined_k141_246035 | [full] | 3123  | No  | NA   | 0  | 2 | Not-determined | Genome-fragment   | NA              | 0     |   |
| S2-final-viral-combined_k141_68377   | [full] | 2148  | No  | NA   | 0  | 0 | Low-quality    | Genome-fragment   | 5.52            | 0     |   |
| S17-final-viral-combined_k141_36030  | [full] | 2958  | No  | NA   | 0  | 2 | Not-determined | Genome-fragment   | NA              | 0     |   |
| S1-final-viral-combined_k141_379797  | [full] | 2149  | No  | NA   | 0  | 0 | Low-quality    | Genome-fragment   | 0.19            | 0     |   |
| S17-final-viral-combined_k141_236072 | [full] | 1469  | No  | NA   | 0  | 0 | Not-determined | Genome-fragment   | NA              | 0     |   |
| S17_k141_49085                       | [full] | 2149  | No  | NA   | 0  | 1 | Low-quality    | Genome-fragment   | 11.96           | 0     |   |
| S17-final-viral-combined_k141_136093 | [full] | 2463  | No  | NA   | 0  | 2 | Not-determined | Genome-fragment   | NA              | 0     |   |
| S17-final-viral-combined_k141_136294 | [full] | 1275  | No  | NA   | 0  | 0 | Not-determined | Genome-fragment   | NA              | 0     |   |
| S17-final-viral-combined_k141_157954 | [full] | 2105  | No  | NA   | 0  | 2 | Not-determined | Genome-fragment   | NA              | 0     |   |
| S4-final-viral-combined_k141_156017  | [full] | 2149  | No  | NA   | 0  | 1 | Low-quality    | Genome-fragment   | 1.17            | 0     |   |
| S7-final-viral-combined_k141_104301  | [full] | 2150  | No  | NA   | 0  | 0 | Low-quality    | Genome-fragment   | 5.5             | 0     |   |
| S12-final-viral-combined_k141_381135 | [full] | 2150  | No  | NA   | 0  | 0 | Low-quality    | Genome-fragment   | 4.26            | 0     |   |
| S12-final-viral-combined_k141_315807 | [full] | 2150  | No  | NA   | 0  | 0 | Low-quality    | Genome-fragment   | 6.88            | 0     |   |
| S17-final-viral-combined_k141_114648 | [full] | 1036  | No  | NA   | 0  | 1 | Not-determined | Genome-fragment   | NA              | 0     |   |
| S17-final-viral-combined_k141_69733  | [full] | 12342 | No  | NA   | 0  | 6 | Not-determined | Genome-fragment   | NA              | 0     |   |
| S17-final-viral-combined_k141_225356 | [full] | 26833 | No  | NA   | 15 | 0 | Medium-quality | Genome-fragment   | 53.77           | 0     |   |
| S12-final-viral-combined_k141_115877 | [full] | 2150  | No  | NA   | 1  | 0 | Low-quality    | Genome-fragment   | 5.32            | 0     |   |
| S17-final-viral-combined_k141_134221 | [full] | 1865  | No  | NA   | 0  | 1 | Not-determined | Genome-fragment   | NA              | 0     |   |
| S17-final-viral-combined_k141_69767  | [full] | 2612  | No  | NA   | 0  | 0 | Not-determined | Genome-fragment   | NA              | 0     |   |
| S17-final-viral-combined_k141_136355 | [full] | 2805  | No  | NA   | 0  | 1 | Not-determined | Genome-fragment   | NA              | 0     |   |
| S4-final-viral-combined_k141_481019  | [full] | 2150  | No  | NA   | 0  | 1 | Low-quality    | Genome-fragment   | 1.05            | 0     |   |
| S17-final-viral-combined_k141_69771  | [full] | 1752  | No  | NA   | 0  | 0 | Not-determined | Genome-fragment   | NA              | 0     |   |
| S17-final-viral-combined_k141_136366 | [full] | 2736  | No  | NA   | 0  | 1 | Not-determined | Genome-fragment   | NA              | 0     |   |
| S17-final-viral-combined_k141_169595 | [full] | 1981  | No  | NA   | 0  | 2 | Not-determined | Genome-fragment   | NA              | 0     |   |
| S17-final-viral-combined_k141_2754   | [full] | 2038  | No  | NA   | 0  | 0 | Not-determined | Genome-fragment   | NA              | 0     |   |
| S8-final-viral-combined_k141_29636   | [full] | 2150  | Yes | 1143 | 1  | 1 | Low-quality    | Genome-fragment   | 2.48            | 46.84 |   |
| S8-final-viral-combined_k141_261686  | [full] | 2150  | No  | NA   | 0  | 0 | Low-quality    | Genome-fragment   | 4.9             | 0     |   |
| S9_k141_47099                        | [full] | 2151  | No  | NA   | 0  | 1 | Low-quality    | Genome-fragment   | 3.73            | 0     |   |
| S17-final-viral-combined_k141_69798  | [full] | 1959  | No  | NA   | 0  | 0 | Not-determined | Genome-fragment   | NA              | 0     |   |
| S17-final-viral-combined_k141_214151 | [full] | 1573  | No  | NA   | 0  | 1 | Not-determined | Genome-fragment   | NA              | 0     |   |
| S17-final-viral-combined_k141_136386 | [full] | 1807  | No  | NA   | 0  | 1 | Not-determined | Genome-fragment   | NA              | 0     |   |
| S17-final-viral-combined_k141_102616 | [full] | 2932  | No  | NA   | 0  | 1 | Not-determined | Genome-fragment   | NA              | 0     |   |
| S17-final-viral-combined_k141_180840 | [full] | 1818  | No  | NA   | 0  | 2 | Not-determined | Genome-fragment   | NA              | 0     |   |
| S1-final-viral-combined_k141_126938  | [full] | 2151  | No  | NA   | 0  | 1 | Low-quality    | Genome-fragment   | 5.02            | 0     |   |
| S17-final-viral-combined_k141_81076  | [full] | 1663  | No  | NA   | 0  | 2 | Not-determined | Genome-fragment   | NA              | 0     |   |
| S17-final-viral-combined_k141_102630 | [full] | 1700  | No  | NA   | 0  | 0 | Not-determined | Genome-fragment   | NA              | 0     |   |
| S1_k141_140618                       | [full] | 2151  | No  | NA   | 0  | 1 | Low-quality    | Genome-fragment   | 2.56            | 0     |   |
| S17-final-viral-combined_k141_81085  | [full] | 2863  | No  | NA   | 0  | 1 | Not-determined | Genome-fragment   | NA              | 0     |   |
| S17-final-viral-combined_k141_180875 | [full] | 2221  | No  | NA   | 0  | 3 | Not-determined | Genome-fragment   | NA              | 0     |   |
| S2_k141_387391                       | [full] | 2151  | No  | NA   | 0  | 0 | Low-quality    | Genome-fragment   | 6.1             | 0     |   |
| S17-final-viral-combined_k141_191957 | [full] | 1387  | No  | NA   | 0  | 2 | Not-determined | Genome-fragment   | NA              | 0     |   |
| S17-final-viral-combined_k141_246877 | [full] | 3122  | No  | NA   | 0  | 2 | Not-determined | Genome-fragment   | NA              | 0     |   |
| S17-final-viral-combined_k141_102650 | [full] | 3088  | No  | NA   | 0  | 2 | Not-determined | Genome-fragment   | NA              | 0     |   |
| S3-final-viral-combined_k141_68777   | [full] | 2151  | No  | NA   | 0  | 1 | Low-quality    | Genome-fragment   | 2.91            | 0     |   |
| S5-final-viral-combined_k141_182413  | [full] | 2151  | No  | NA   | 1  | 0 | Low-quality    | Genome-fragment   | 3.81            | 0     |   |
| S17-final-viral-combined_k141_169661 | [full] | 8603  | No  | NA   | 0  | 3 | Not-determined | Genome-fragment   | NA              | 0     |   |
| S17-final-viral-combined_k141_24720  | [full] | 1272  | No  | NA   | 0  | 0 | Not-determined | Genome-fragment   | NA              | 0     |   |
| S17-final-viral-combined_k141_91164  | [full] | 1512  | No  | NA   | 0  | 0 | Not-determined | Genome-fragment</ |                 |       |   |



|                                      |          |       |    |    |    |    |                |                 |    |       |   |
|--------------------------------------|----------|-------|----|----|----|----|----------------|-----------------|----|-------|---|
| S17-final-viral-combined_k141_58367  | [full]   | 1980  | No | NA | 0  | 1  | Not-determined | Genome-fragment | NA | 0     | 0 |
| S17-final-viral-combined_k141_58368  | [full]   | 2964  | No | NA | 0  | 7  | Not-determined | Genome-fragment | NA | 0     | 0 |
| S12-final-viral-combined_k141_262950 | [full]   | 2154  | No | NA | 2  | 0  | Low-quality    | Genome-fragment | NA | 2.06  | 0 |
| S17-final-viral-combined_k141_203579 | [full]   | 2695  | No | NA | 0  | 2  | Not-determined | Genome-fragment | NA | 0     | 0 |
| S17-final-viral-combined_k141_58374  | [full]   | 1817  | No | NA | 0  | 0  | Not-determined | Genome-fragment | NA | 0     | 0 |
| S17-final-viral-combined_k141_134621 | [full]   | 26533 | No | NA | 16 | 0  | Medium-quality | Genome-fragment | NA | 67.53 | 0 |
| S12-final-viral-combined_k141_63905  | [full]   | 2154  | No | NA | 0  | 2  | Low-quality    | Genome-fragment | NA | 2.42  | 0 |
| S17-final-viral-combined_k141_58384  | [full]   | 2483  | No | NA | 0  | 3  | Not-determined | Genome-fragment | NA | 0     | 0 |
| S17-final-viral-combined_k141_158140 | [full]   | 1310  | No | NA | 0  | 0  | Not-determined | Genome-fragment | NA | 0     | 0 |
| S17-final-viral-combined_k141_147662 | [full]   | 2574  | No | NA | 0  | 1  | Not-determined | Genome-fragment | NA | 0     | 0 |
| S17-final-viral-combined_k141_24923  | [full]   | 4067  | No | NA | 0  | 3  | Not-determined | Genome-fragment | NA | 0     | 0 |
| S17-final-viral-combined_k141_114968 | [full]   | 1595  | No | NA | 0  | 1  | Not-determined | Genome-fragment | NA | 0     | 0 |
| S12-final-viral-combined_k141_31158  | [full]   | 2154  | No | NA | 0  | 0  | Low-quality    | Genome-fragment | NA | 5.88  | 0 |
| S17-final-viral-combined_k141_3015   | [full]   | 5002  | No | NA | 0  | 3  | Not-determined | Genome-fragment | NA | 0     | 0 |
| S12_k141_263753                      |          | 2154  | No | NA | 0  | 0  | Low-quality    | Genome-fragment | NA | 3.79  | 0 |
| S17-final-viral-combined_k141_216408 | [full]   | 1408  | No | NA | 0  | 2  | Not-determined | Genome-fragment | NA | 0     | 0 |
| S12-final-viral-combined_k141_235701 | [full]   | 2154  | No | NA | 1  | 0  | Low-quality    | Genome-fragment | NA | 5.56  | 0 |
| S17-final-viral-combined_k141_36394  | [full]   | 1347  | No | NA | 0  | 2  | Not-determined | Genome-fragment | NA | 0     | 0 |
| S1-final-viral-combined_k141_194821  | [full]   | 2155  | No | NA | 0  | 1  | Low-quality    | Genome-fragment | NA | 5.06  | 0 |
| S17-final-viral-combined_k141_213357 | [full]   | 2155  | No | NA | 0  | 0  | Low-quality    | Genome-fragment | NA | 3.38  | 0 |
| S12-final-viral-combined_k141_112966 | [full]   | 2155  | No | NA | 3  | 0  | Low-quality    | Genome-fragment | NA | 3.07  | 0 |
| S17-final-viral-combined_k141_70019  | [full]   | 1060  | No | NA | 0  | 0  | Not-determined | Genome-fragment | NA | 0     | 0 |
| S17-final-viral-combined_k141_169863 | [full]   | 2017  | No | NA | 0  | 2  | Not-determined | Genome-fragment | NA | 0     | 0 |
| S11-final-viral-combined_k141_154533 | [full]   | 2156  | No | NA | 0  | 1  | Low-quality    | Genome-fragment | NA | 1.41  | 0 |
| S1-final-viral-combined_k141_393177  | [full]   | 2156  | No | NA | 2  | 0  | Low-quality    | Genome-fragment | NA | 4.96  | 0 |
| S17-final-viral-combined_k141_214757 | [full]   | 1363  | No | NA | 0  | 1  | Not-determined | Genome-fragment | NA | 0     | 0 |
| S17-final-viral-combined_k141_115050 | [full]   | 2631  | No | NA | 0  | 1  | Not-determined | Genome-fragment | NA | 0     | 0 |
| S17-final-viral-combined_k141_3071   | [full]   | 5335  | No | NA | 0  | 4  | Not-determined | Genome-fragment | NA | 0     | 0 |
| S17-final-viral-combined_k141_216408 | [full]   | 2156  | No | NA | 0  | 1  | Low-quality    | Genome-fragment | NA | 1.61  | 0 |
| S17-final-viral-combined_k141_81410  | [full]   | 10609 | No | NA | 0  | 9  | Not-determined | Genome-fragment | NA | 1.04  | 0 |
| S17-final-viral-combined_k141_158884 | [full]   | 2156  | No | NA | 0  | 1  | Low-quality    | Genome-fragment | NA | 1.88  | 0 |
| S12-final-viral-combined_k141_186761 | [full]   | 2156  | No | NA | 0  | 0  | Low-quality    | Genome-fragment | NA | 4.43  | 0 |
| S17-final-viral-combined_k141_125737 | [full]   | 4047  | No | NA | 0  | 3  | Not-determined | Genome-fragment | NA | 0     | 0 |
| S17-final-viral-combined_k141_236396 | [full]   | 1703  | No | NA | 0  | 1  | Not-determined | Genome-fragment | NA | 0     | 0 |
| S12-final-viral-combined_k141_224541 | [full]   | 2156  | No | NA | 3  | 0  | Low-quality    | Genome-fragment | NA | 6.2   | 0 |
| S18-final-viral-combined_k141_140100 | [full]   | 2156  | No | NA | 0  | 1  | Low-quality    | Genome-fragment | NA | 2.28  | 0 |
| S18-final-viral-combined_k141_50674  | [full]   | 2156  | No | NA | 0  | 1  | Low-quality    | Genome-fragment | NA | 1.14  | 0 |
| S12-final-viral-combined_k141_312937 | [full]   | 2157  | No | NA | 4  | 0  | Low-quality    | Genome-fragment | NA | 3.36  | 0 |
| S17-final-viral-combined_k141_46815  | [full]   | 2427  | No | NA | 0  | 2  | Not-determined | Genome-fragment | NA | 0     | 0 |
| S17-final-viral-combined_k141_102987 | [full]   | 6597  | No | NA | 0  | 2  | Not-determined | Genome-fragment | NA | 0     | 0 |
| S16-final-viral-combined_k141_159505 | [full]   | 2157  | No | NA | 0  | 1  | Low-quality    | Genome-fragment | NA | 0.58  | 0 |
| S11-final-viral-combined_k141_180345 | [full]   | 2158  | No | NA | 0  | 0  | Low-quality    | Genome-fragment | NA | 1.61  | 0 |
| S1-final-viral-combined_k141_6378    | [full]   | 2158  | No | NA | 0  | 0  | Low-quality    | Genome-fragment | NA | 1.48  | 0 |
| S1-final-viral-combined_k141_207919  | [full]   | 2158  | No | NA | 0  | 0  | Low-quality    | Genome-fragment | NA | 3.52  | 0 |
| S17-final-viral-combined_k141_203701 | [full]   | 71387 | No | NA | 1  | 23 | Medium-quality | Genome-fragment | NA | 63.38 | 0 |
| S17-final-viral-combined_k141_104141 | [full]   | 2158  | No | NA | 0  | 1  | Low-quality    | Genome-fragment | NA | 4.87  | 0 |
| S17-final-viral-combined_k141_222628 | [full]   | 2158  | No | NA | 2  | 0  | Low-quality    | Genome-fragment | NA | 2.62  | 0 |
| S12_k141_384856                      |          | 2158  | No | NA | 0  | 1  | Low-quality    | Genome-fragment | NA | 1.99  | 0 |
| S17-final-viral-combined_k141_225744 | [full]   | 1463  | No | NA | 0  | 1  | Not-determined | Genome-fragment | NA | 0     | 0 |
| S17-final-viral-combined_k141_168985 | [full]   | 1184  | No | NA | 0  | 1  | Not-determined | Genome-fragment | NA | 0     | 0 |
| S17-final-viral-combined_k141_115134 | [full]   | 1573  | No | NA | 0  | 1  | Not-determined | Genome-fragment | NA | 0     | 0 |
| S17-final-viral-combined_k141_81521  | [full]   | 4554  | No | NA | 0  | 4  | Not-determined | Genome-fragment | NA | 0     | 0 |
| S16-final-viral-combined_k141_96859  | [full]   | 2158  | No | NA | 0  | 0  | Low-quality    | Genome-fragment | NA | 3.63  | 0 |
| S17-final-viral-combined_k141_147836 | [full]   | 2198  | No | NA | 0  | 2  | Not-determined | Genome-fragment | NA | 0     | 0 |
| S17-final-viral-combined_k141_103031 | [full]   | 4299  | No | NA | 0  | 2  | Not-determined | Genome-fragment | NA | 0     | 0 |
| S18-final-viral-combined_k141_35748  | [full]   | 2159  | No | NA | 2  | 0  | Low-quality    | Genome-fragment | NA | 5.4   | 0 |
| S18-final-viral-combined_k141_61519  | [H2gene] | 2159  | No | NA | 1  | 0  | Low-quality    | Genome-fragment | NA | 1.41  | 0 |
| S17-final-viral-combined_k141_158222 | [full]   | 3523  | No | NA | 0  | 0  | Not-determined | Genome-fragment | NA | 0     | 0 |
| S16-final-viral-combined_k141_122001 | [full]   | 2159  | No | NA | 0  | 0  | Low-quality    | Genome-fragment | NA | 4.09  | 0 |
| S17-final-viral-combined_k141_3187   | [full]   | 2667  | No | NA | 0  | 2  | Not-determined | Genome-fragment | NA | 0     | 0 |
| S17-final-viral-combined_k141_84302  | [full]   | 2159  | No | NA | 0  | 1  | Low-quality    | Genome-fragment | NA | 1.07  | 0 |
| S17-final-viral-combined_k141_31436  | [full]   | 3503  | No | NA | 0  | 2  | Not-determined | Genome-fragment | NA | 0     | 0 |
| S17-final-viral-combined_k141_36508  | [full]   | 1226  | No | NA | 0  | 2  | Not-determined | Genome-fragment | NA | 0     | 0 |
| S17-final-viral-combined_k141_125844 | [full]   | 2257  | No | NA | 0  | 0  | Not-determined | Genome-fragment | NA | 0     | 0 |
| S12-final-viral-combined_k141_157529 | [full]   | 2159  | No | NA | 0  | 0  | Low-quality    | Genome-fragment | NA | 2.18  | 0 |
| S17-final-viral-combined_k141_203794 | [full]   | 1880  | No | NA | 0  | 1  | Not-determined | Genome-fragment | NA | 0     | 0 |
| S17-final-viral-combined_k141_225790 | [full]   | 3558  | No | NA | 0  | 4  | Not-determined | Genome-fragment | NA | 0     | 0 |
| S17-final-viral-combined_k141_136863 | [full]   | 2818  | No | NA | 0  | 2  | Not-determined | Genome-fragment | NA | 0     | 0 |
| S17-final-viral-combined_k141_125875 | [full]   | 1766  | No | NA | 0  | 0  | Not-determined | Genome-fragment | NA | 0     | 0 |
| S12-final-viral-combined_k141_127985 | [full]   | 2159  | No | NA | 0  | 0  | Low-quality    | Genome-fragment | NA | 4.08  | 0 |
| S4_k141_107476                       |          | 2159  | No | NA | 2  | 0  | Low-quality    | Genome-fragment | NA | 1.24  | 0 |
| S18-final-viral-combined_k141_40461  | [H2gene] | 2159  | No | NA | 2  | 0  | Low-quality    | Genome-fragment | NA | 5.42  | 0 |
| S11-final-viral-combined_k141_179142 | [full]   | 2160  | No | NA | 0  | 0  | Low-quality    | Genome-fragment | NA | 1.85  | 0 |
| S14-final-viral-combined_k141_23305  | [H2gene] | 2160  | No | NA | 1  | 0  | Low-quality    | Genome-fragment | NA | 1.36  | 0 |
| S17-final-viral-combined_k141_103121 | [full]   | 2653  | No | NA | 0  | 2  | Not-determined | Genome-fragment | NA | 0     | 0 |
| S17-final-viral-combined_k141_203826 | [full]   | 1700  | No | NA | 0  | 2  | Not-determined | Genome-fragment | NA | 0     | 0 |
| S17-final-viral-combined_k141_137961 | [full]   | 1917  | No | NA | 0  | 0  | Not-determined | Genome-fragment | NA | 0     | 0 |
| S17-final-viral-combined_k141_203837 | [full]   | 3088  | No | NA | 0  | 2  | Not-determined | Genome-fragment | NA | 0     | 0 |
| S17-final-viral-combined_k141_181421 | [full]   | 7218  | No | NA | 0  | 6  | Not-determined | Genome-fragment | NA | 0     | 0 |
| S17-final-viral-combined_k141_192519 | [full]   | 2071  | No | NA | 0  | 1  | Not-determined | Genome-fragment | NA | 0     | 0 |
| S16-final-viral-combined_k141_190234 | [full]   | 2160  | No | NA | 0  | 0  | Low-quality    | Genome-fragment | NA | 6.03  | 0 |
| S16-final-viral-combined_k141_70609  | [full]   | 2160  | No | NA | 0  | 0  | Low-quality    | Genome-fragment | NA | 4.31  | 0 |
| S17-final-viral-combined_k141_91465  | [full]   | 2160  | No | NA | 1  | 0  | Low-quality    | Genome-fragment | NA | 5.64  | 0 |
| S17-final-viral-combined_k141_139696 | [full]   | 2161  | No | NA | 3  | 0  | Low-quality    | Genome-fragment | NA | 4.89  | 0 |
| S17-final-viral-combined_k141_81590  | [full]   | 11351 | No | NA | 2  | 0  | Not-determined | Genome-fragment | NA | 0     | 0 |
| S17-final-viral-combined_k141_247211 | [full]   | 4306  | No | NA | 0  | 0  | Not-determined | Genome-fragment | NA | 0     | 0 |
| S17-final-viral-combined_k141_203868 | [full]   | 5083  | No | NA | 0  | 3  | Not-determined | Genome-fragment | NA | 0     | 0 |
| S18-final-viral-combined_k141_94950  | [full]   | 2161  | No | NA | 0  | 0  | Low-quality    | Genome-fragment | NA | 5.34  | 0 |
| S1-final-viral-combined_k141_381637  | [full]   | 2162  | No | NA | 0  | 0  | Low-quality    | Genome-fragment | NA | 4.73  | 0 |
| S17-final-viral-combined_k141_170009 | [full]   | 1504  | No | NA | 0  | 2  | Not-determined | Genome-fragment | NA | 0     | 0 |
| S16-final-viral-combined_k141_181085 | [full]   | 2162  | No | NA | 2  | 0  | Low-quality    | Genome-fragment | NA | 5.04  | 0 |
| S17-final-viral-combined_k141_167926 | [full]   | 2162  | No | NA | 0  | 1  | Low-quality    | Genome-fragment | NA | 1.07  | 0 |
| S12-final-viral-combined_k141_360526 | [full]   | 2162  | No | NA | 0  | 0  | Low-quality    | Genome-fragment | NA | 4.15  | 0 |
| S17-final-viral-combined_k141_36614  | [full]   | 1654  | No | NA | 0  | 1  | Not-determined | Genome-fragment | NA | 1.18  | 0 |
| S12_k141_354730                      |          | 2162  | No | NA | 0  | 0  | Low-quality    | Genome-fragment | NA | 1.76  | 0 |
| S4-final-viral-combined_k141_35785   | [full]   | 2162  | No | NA | 0  | 0  | Low-quality    | Genome-fragment | NA | 0     | 0 |
| S17-final-viral-combined_k141_158354 | [full]   | 41783 | No | NA | 12 | 1  | Medium-quality | Genome-fragment | NA | 64.61 | 0 |
| S17-final-viral-combined_k141_236583 | [full]   | 17497 | No | NA | 0  | 7  | Not-determined | Genome-fragment | NA | 0     | 0 |
| S17-final-viral-combined_k141_36341  | [full]   | 2102  | No | NA | 0  | 2  | Not-determined | Genome-fragment | NA | 0     | 0 |
| S17-final-viral-combined_k141_214928 | [full]   | 2397  | No | NA | 0  | 2  | Not-determined | Genome-fragment | NA | 0     | 0 |
| S18-final-viral-combined_k141_191159 | [full]   | 2162  | No | NA | 0  | 0  | Low-quality    | Genome-fragment | NA | 4.06  | 0 |
| S17-final-viral-combined_k141_225814 | [full]   | 1171  | No | NA | 0  | 0  | Not-determined | Genome-fragment | NA | 0     | 0 |
| S11-final-viral-combined_k141_124092 | [full]   | 2163  | No | NA | 0  | 0  | Low-quality    | Genome-fragment | NA | 5.61  | 0 |
| S17-final-viral-combined_k141_181555 | [full]   | 1585  | No | NA | 0  | 1  | Not-determined | Genome-fragment | NA | 0     | 0 |
| S17-final-viral-combined_k141_91516  | [full]   | 2050  | No | NA | 0  | 2  | Not-determined | Genome-fragment | NA | 0     | 0 |
| S11-final-viral-combined_k141_18315  | [full]   | 2163  | No | NA | 0  | 1  | Low-quality    | Genome-fragment | NA | 4.64  | 0 |
| S11-final-viral-combined_k141_145939 | [H2gene] | 2163  | No | NA | 2  | 0  | Low-quality    | Genome-fragment | NA | 3.54  | 0 |
| S17-final-viral-combined_k141_91560  | [full]   | 4195  | No | NA | 0  | 0  | Not-determined | Genome-fragment | NA | 0     | 0 |
| S17-final-viral-combined_k141_225933 | [full]   | 2643  | No | NA | 0  | 0  | Low-quality    | Genome-fragment | NA | 0     | 0 |
| S1_k141_168049                       |          | 2163  | No | NA | 0  | 1  | Low-quality    | Genome-fragment | NA | 0.81  | 0 |
| S17-final-viral-combined_k141_145665 | [full]   | 2163  | No | NA | 0  | 1  | Low-quality    | Genome-fragment | NA | 4.24  | 0 |
| S4_k141_7556                         |          | 2163  | No | NA | 0  | 0  | Low-quality    | Genome-fragment | NA | 0.94  | 0 |
| S17-final-viral-combined_k141_192636 | [full]   | 2200  | No | NA | 0  | 1  | Not-determined | Genome-fragment | NA | 0     | 0 |
| S4_k141_15012                        |          | 2163  | No | NA | 0  | 2  | Low-quality    | Genome-fragment | NA | 1.65  | 0 |
| S16-final-viral-combined_k141_59829  | [full]   | 2163  | No | NA | 1  | 0  | Low-quality    | Genome-fragment | NA | 5.25  | 0 |
| S11-final-viral-combined_k141_73441  | [full]   | 2164  | No | NA | 2  | 0  | Low-quality    | Genome-fragment | NA | 3.33  | 0 |
| S17-final-viral-combined_k141_192621 | [full]   | 5750  | No | NA | 0  | 6  | Not-determined | Genome-fragment | NA | 0     | 0 |
| S16-final-viral-combined_k141_150263 | [full]   | 2164  | No | NA | 0  | 0  | Low-quality    | Genome-fragment | NA | 4.12  | 0 |
| S17-final-viral-combined_k141_81152  | [full]   | 1910  | No | NA | 0  | 0  | Not-determined | Genome-fragment | NA | 0     | 0 |
| S18-final-viral-combined_k141_125099 | [full]   | 2164  | No | NA | 0  | 0  | Low-quality    | Genome-fragment | NA | 4.21  | 0 |
| S12-final-viral-combined_k141_77933  | [full]   | 2164  | No | NA | 1  | 0  | Low-quality    | Genome-fragment | NA |       |   |



|                                                |       |     |    |   |                |                 |                 |       |       |
|------------------------------------------------|-------|-----|----|---|----------------|-----------------|-----------------|-------|-------|
| S11-final-viral-combined_k141_224870]] [full   | 2169  | No  | NA | 4 | 0              | Low-quality     | Genome-fragment | 4.02  | 0     |
| S11-final-viral-combined_k141_79246]] [H2gene  | 2169  | No  | NA | 1 | 0              | Low-quality     | Genome-fragment | 4.93  | 0     |
| S17-final-viral-combined_k141_58979]] [full    | 2047  | No  | NA | 0 | 0              | Not-determined  | Genome-fragment | NA    | 0     |
| S11-final-viral-combined_k141_334016]] [full   | 2169  | No  | NA | 0 | 0              | Low-quality     | Genome-fragment | 4.69  | 0     |
| S17-final-viral-combined_k141_103489]] [full   | 8824  | No  | NA | 0 | 2              | Not-determined  | Genome-fragment | NA    | 0     |
| S1-final-viral-combined_k141_91211]] [full     | 2169  | No  | NA | 2 | 0              | Low-quality     | Genome-fragment | 4.81  | 0     |
| S17-final-viral-combined_k141_158581]] [full   | 1386  | No  | NA | 0 | 1              | Not-determined  | Genome-fragment | NA    | 0     |
| S17-final-viral-combined_k141_25370]] [full    | 1683  | No  | NA | 0 | 0              | Not-determined  | Genome-fragment | NA    | 0     |
| S17-final-viral-combined_k141_36805]] [full    | 1869  | No  | NA | 0 | 1              | Not-determined  | Genome-fragment | NA    | 0     |
| S17-final-viral-combined_k141_126261]] [full   | 1485  | No  | NA | 0 | 0              | Not-determined  | Genome-fragment | NA    | 0     |
| S3_k141_90413                                  | 2169  | No  | NA | 0 | 0              | Low-quality     | Genome-fragment | 3.48  | 0     |
| S7-final-viral-combined_k141_111391]] [full    | 2169  | Yes | NA | 1 | 1              | Low-quality     | Genome-fragment | 2.14  | 41.26 |
| S17-final-viral-combined_k141_36838]] [full    | 3586  | No  | NA | 0 | 0              | Not-determined  | Genome-fragment | NA    | 0     |
| S17-final-viral-combined_k141_103550]] [full   | 1141  | No  | NA | 0 | 0              | Not-determined  | Genome-fragment | NA    | 0     |
| S17-final-viral-combined_k141_204206]] [full   | 1967  | No  | NA | 0 | 2              | Not-determined  | Genome-fragment | NA    | 0     |
| S17-final-viral-combined_k141_203699]] [full   | 2169  | No  | NA | 0 | 1              | Low-quality     | Genome-fragment | 6.14  | 0     |
| S17-final-viral-combined_k141_192939]] [full   | 3087  | No  | NA | 0 | 4              | Not-determined  | Genome-fragment | NA    | 0     |
| S17-final-viral-combined_k141_170675]] [full   | 2169  | No  | NA | 0 | 2              | Low-quality     | Genome-fragment | 0.6   | 0     |
| S17-final-viral-combined_k141_49554]] [full    | 2169  | No  | NA | 0 | 1              | Low-quality     | Genome-fragment | 2.69  | 0     |
| S6-final-viral-combined_k141_14217]] [full     | 2169  | No  | NA | 0 | 0              | Low-quality     | Genome-fragment | 3.01  | 0     |
| S17-final-viral-combined_k141_258985]] [full   | 2417  | No  | NA | 0 | 1              | Not-determined  | Genome-fragment | NA    | 0     |
| S17-final-viral-combined_k141_82096]] [full    | 1659  | No  | NA | 0 | 2              | Not-determined  | Genome-fragment | NA    | 0     |
| S17-final-viral-combined_k141_226235]] [full   | 2094  | No  | NA | 0 | 1              | Not-determined  | Genome-fragment | NA    | 0     |
| S17-final-viral-combined_k141_103590]] [full   | 1074  | No  | NA | 0 | 0              | Not-determined  | Genome-fragment | NA    | 0     |
| S17-final-viral-combined_k141_259001]] [full   | 1916  | No  | NA | 0 | 0              | Not-determined  | Genome-fragment | NA    | 0     |
| S17-final-viral-combined_k141_156875]] [full   | 2818  | No  | NA | 0 | 0              | Not-determined  | Genome-fragment | NA    | 0     |
| S17-final-viral-combined_k141_204242]] [full   | 1346  | No  | NA | 0 | 0              | Not-determined  | Genome-fragment | NA    | 0     |
| S11-final-viral-combined_k141_107251]] [full   | 2170  | No  | NA | 0 | 0              | Low-quality     | Genome-fragment | NA    | 0     |
| S17-final-viral-combined_k141_70867]] [full    | 1129  | No  | NA | 0 | 0              | Not-determined  | Genome-fragment | NA    | 0     |
| S1-final-viral-combined_k141_86525]] [full     | 2170  | No  | NA | 0 | 0              | Low-quality     | Genome-fragment | 3.63  | 0     |
| S17-final-viral-combined_k141_215481]] [full   | 2545  | No  | NA | 0 | 0              | Not-determined  | Genome-fragment | NA    | 0     |
| S12-final-viral-combined_k141_19468]] [full    | 2170  | No  | NA | 2 | 0              | Low-quality     | Genome-fragment | 2.7   | 0     |
| S2_k141_130970                                 | 2170  | No  | NA | 0 | 1              | Low-quality     | Genome-fragment | 4.42  | 0     |
| S4-final-viral-combined_k141_39066]] [full     | 2170  | No  | NA | 0 | 2              | Low-quality     | Genome-fragment | 3.4   | 0     |
| S9-final-viral-combined_k141_64705]] [full     | 2171  | No  | NA | 3 | 0              | Low-quality     | Genome-fragment | 4.73  | 0     |
| S9-final-viral-combined_k141_38005]] [full     | 2171  | No  | NA | 0 | 0              | Low-quality     | Genome-fragment | NA    | 3     |
| S17-final-viral-combined_k141_158721]] [full   | 3689  | No  | NA | 0 | 7              | Not-determined  | Genome-fragment | NA    | 0     |
| S17-final-viral-combined_k141_137299]] [full   | 5258  | No  | NA | 0 | 5              | Not-determined  | Genome-fragment | NA    | 0     |
| S17-final-viral-combined_k141_115096]] [full   | 1385  | No  | NA | 0 | 2              | Not-determined  | Genome-fragment | NA    | 0     |
| S7-final-viral-combined_k141_67708]] [H2gene   | 2171  | No  | NA | 1 | 0              | Low-quality     | Genome-fragment | 5.25  | 0     |
| S17-final-viral-combined_k141_247601]] [full   | 4735  | No  | NA | 0 | 4              | Not-determined  | Genome-fragment | NA    | 0     |
| S17-final-viral-combined_k141_176041]] [full   | 1777  | No  | NA | 0 | 0              | Not-determined  | Genome-fragment | NA    | 0     |
| S17-final-viral-combined_k141_137321]] [full   | 2078  | No  | NA | 0 | 0              | Not-determined  | Genome-fragment | NA    | 0     |
| S12-final-viral-combined_k141_328794]] [full   | 2171  | No  | NA | 0 | 0              | Low-quality     | Genome-fragment | 1     | 0     |
| S17-final-viral-combined_k141_204336]] [full   | 3035  | No  | NA | 0 | 2              | Not-determined  | Genome-fragment | NA    | 0     |
| S17-final-viral-combined_k141_137335]] [full   | 1133  | No  | NA | 0 | 1              | Not-determined  | Genome-fragment | NA    | 0     |
| S17-final-viral-combined_k141_204350]] [full   | 1330  | No  | NA | 0 | 0              | Not-determined  | Genome-fragment | NA    | 0     |
| S12_k141_261183                                | 2171  | No  | NA | 0 | 0              | Low-quality     | Genome-fragment | NA    | 1.19  |
| S17-final-viral-combined_k141_183030]] [full   | 4404  | No  | NA | 0 | 1              | Not-determined  | Genome-fragment | NA    | 0     |
| S4-final-viral-combined_k141_31694]] [full     | 2171  | No  | NA | 1 | 0              | Low-quality     | Genome-fragment | 2.12  | 0     |
| S8-final-viral-combined_k141_107321]] [full    | 2171  | No  | NA | 0 | 0              | Low-quality     | Genome-fragment | 1.39  | 0     |
| S17-final-viral-combined_k141_115092]] [full   | 14740 | No  | NA | 5 | Not-determined | Genome-fragment | NA              | 0     |       |
| S17-final-viral-combined_k141_36922]] [full    | 3359  | No  | NA | 0 | 3              | Not-determined  | Genome-fragment | NA    | 0     |
| S9-final-viral-combined_k141_78931]] [full     | 2172  | No  | NA | 0 | 3              | Low-quality     | Genome-fragment | 1.56  | 0     |
| S17-final-viral-combined_k141_82191]] [full    | 2789  | No  | NA | 0 | 1              | Not-determined  | Genome-fragment | NA    | 2.92  |
| S11-final-viral-combined_k141_85182]] [full    | 2172  | No  | NA | 1 | 0              | Low-quality     | Genome-fragment | NA    | 0     |
| S17-final-viral-combined_k141_193086]] [full   | 3240  | No  | NA | 0 | 0              | Not-determined  | Genome-fragment | NA    | 0     |
| S17-final-viral-combined_k141_25721]] [full    | 1271  | No  | NA | 0 | 1              | Not-determined  | Genome-fragment | NA    | 0     |
| S17-final-viral-combined_k141_82204]] [full    | 2015  | No  | NA | 0 | 0              | Not-determined  | Genome-fragment | NA    | 0     |
| S17-final-viral-combined_k141_82212]] [full    | 5699  | No  | NA | 0 | 4              | Not-determined  | Genome-fragment | NA    | 0     |
| S11-final-viral-combined_k141_356133]] [full   | 2172  | No  | NA | 0 | 0              | Low-quality     | Genome-fragment | 7.63  | 0     |
| S17-final-viral-combined_k141_115971]] [full   | 11473 | No  | NA | 0 | 6              | Not-determined  | Genome-fragment | NA    | 0     |
| S17-final-viral-combined_k141_247611]] [full   | 6086  | No  | NA | 0 | 5              | Not-determined  | Genome-fragment | NA    | 0     |
| S11-final-viral-combined_k141_76413]] [full    | 2172  | No  | NA | 1 | 0              | Low-quality     | Genome-fragment | 2.84  | 0     |
| S17-final-viral-combined_k141_158810]] [full   | 1889  | No  | NA | 0 | 0              | Not-determined  | Genome-fragment | NA    | 0     |
| S12-final-viral-combined_k141_365442]] [full   | 2172  | No  | NA | 0 | 1              | Low-quality     | Genome-fragment | 0.62  | 0     |
| S17-final-viral-combined_k141_193144]] [full   | 2082  | No  | NA | 0 | 2              | Not-determined  | Genome-fragment | NA    | 0     |
| S8-final-viral-combined_k141_237708]] [full    | 2172  | No  | NA | 0 | 1              | Low-quality     | Genome-fragment | 4.5   | 0     |
| S17-final-viral-combined_k141_116034]] [full   | 1013  | No  | NA | 0 | 0              | Not-determined  | Genome-fragment | NA    | 0     |
| S17-final-viral-combined_k141_237002]] [full   | 1058  | No  | NA | 0 | 0              | Not-determined  | Genome-fragment | NA    | 0     |
| S11-final-viral-combined_k141_2021]] [full     | 2173  | No  | NA | 2 | 0              | Low-quality     | Genome-fragment | 5.39  | 0     |
| S12-final-viral-combined_k141_374762]] [full   | 2173  | No  | NA | 0 | 2              | Low-quality     | Genome-fragment | 5.0   | 0     |
| S17-final-viral-combined_k141_80152]] [full    | 2174  | No  | NA | 0 | 2              | Low-quality     | Genome-fragment | 0.69  | 0     |
| S17-final-viral-combined_k141_237008]] [full   | 1224  | No  | NA | 0 | 1              | Not-determined  | Genome-fragment | NA    | 0     |
| S17-final-viral-combined_k141_192978]] [full   | 2174  | Yes | NA | 0 | 1              | Low-quality     | Genome-fragment | 2.49  | 37.49 |
| S17-final-viral-combined_k141_126411]] [full   | 2021  | No  | NA | 0 | 0              | Not-determined  | Genome-fragment | NA    | 0     |
| S17-final-viral-combined_k141_70921]] [full    | 29900 | No  | NA | 0 | 19             | Not-determined  | Genome-fragment | NA    | 0     |
| S9-final-viral-combined_k141_3000]] [full      | 2175  | No  | NA | 1 | 0              | Low-quality     | Genome-fragment | 2.6   | 0     |
| S17-final-viral-combined_k141_237038]] [full   | 1701  | No  | NA | 0 | 1              | Not-determined  | Genome-fragment | NA    | 0     |
| S11-final-viral-combined_k141_182963]] [full   | 2175  | No  | NA | 0 | 0              | Low-quality     | Genome-fragment | 4.94  | 0     |
| S12-final-viral-combined_k141_56240]] [full    | 2175  | No  | NA | 0 | 1              | Low-quality     | Genome-fragment | 4.6   | 0     |
| S17-final-viral-combined_k141_70936]] [full    | 1016  | No  | NA | 0 | 1              | Not-determined  | Genome-fragment | NA    | 0     |
| S12_k141_276172                                | 2175  | No  | NA | 0 | 0              | Low-quality     | Genome-fragment | 1.17  | 0     |
| S17-final-viral-combined_k141_3722]] [full     | 6271  | No  | NA | 0 | 1              | Not-determined  | Genome-fragment | NA    | 0     |
| S17-final-viral-combined_k141_204602]] [full   | 12221 | No  | NA | 0 | 2              | Not-determined  | Genome-fragment | NA    | 0     |
| S17-final-viral-combined_k141_215651]] [full   | 1706  | No  | NA | 0 | 0              | Not-determined  | Genome-fragment | NA    | 0     |
| S17-final-viral-combined_k141_126460]] [full   | 4436  | No  | NA | 0 | 4              | Not-determined  | Genome-fragment | NA    | 0     |
| S17-final-viral-combined_k141_3742]] [full     | 1482  | No  | NA | 0 | 1              | Not-determined  | Genome-fragment | NA    | 0     |
| S17-final-viral-combined_k141_226337]] [full   | 2484  | No  | NA | 0 | 1              | Not-determined  | Genome-fragment | NA    | 0     |
| S17-final-viral-combined_k141_59226]] [full    | 1629  | No  | NA | 0 | 2              | Not-determined  | Genome-fragment | NA    | 0     |
| S17-final-viral-combined_k141_237091]] [full   | 2264  | No  | NA | 0 | 2              | Not-determined  | Genome-fragment | NA    | 0     |
| S17-final-viral-combined_k141_126484]] [full   | 3101  | No  | NA | 0 | 2              | Not-determined  | Genome-fragment | NA    | 0     |
| S2_k141_14859                                  | 2175  | No  | NA | 1 | 0              | Low-quality     | Genome-fragment | 3.36  | 0     |
| S9-final-viral-combined_k141_87497]] [full     | 2176  | No  | NA | 2 | 0              | Low-quality     | Genome-fragment | 5.58  | 0     |
| S17-final-viral-combined_k141_254097]] [full   | 2176  | No  | NA | 0 | 0              | Low-quality     | Genome-fragment | 2.62  | 0     |
| S8-final-viral-combined_k141_19018]] [full     | 2176  | No  | NA | 1 | 0              | Low-quality     | Genome-fragment | 3.49  | 0     |
| S17-final-viral-combined_k141_70983]] [full    | 27910 | No  | NA | 0 | 5              | Medium-quality  | Genome-fragment | 80.49 | 0     |
| S17-final-viral-combined_k141_158884]] [full   | 2018  | No  | NA | 0 | 1              | Low-quality     | Genome-fragment | NA    | 4.15  |
| S9-final-viral-combined_k141_15512]] [full     | 2177  | No  | NA | 0 | 1              | Low-quality     | Genome-fragment | NA    | 0     |
| S17-final-viral-combined_k141_103782]] [full   | 2316  | No  | NA | 0 | 4              | Not-determined  | Genome-fragment | NA    | 0     |
| S2-final-viral-combined_k141_172130]] [full    | 2177  | No  | NA | 0 | 1              | Low-quality     | Genome-fragment | 3.84  | 0     |
| S17-final-viral-combined_k141_95916]] [full    | 2381  | No  | NA | 0 | 1              | Not-determined  | Genome-fragment | NA    | 0     |
| S17-final-viral-combined_k141_71002]] [full    | 7057  | No  | NA | 0 | 6              | Not-determined  | Genome-fragment | NA    | 0     |
| S4-final-viral-combined_k141_48829]] [full     | 2177  | No  | NA | 0 | 0              | Low-quality     | Genome-fragment | 2.23  | 0     |
| S4_k141_63542                                  | 2177  | No  | NA | 0 | 0              | Low-quality     | Genome-fragment | 3.64  | 0     |
| S17-final-viral-combined_k141_137591]] [full   | 2314  | No  | NA | 0 | 0              | Not-determined  | Genome-fragment | NA    | 0     |
| S17-final-viral-combined_k141_182290]] [full   | 1660  | No  | NA | 0 | 0              | Not-determined  | Genome-fragment | NA    | 0     |
| S6-final-viral-combined_k141_120387]] [full    | 2177  | No  | NA | 0 | 0              | Low-quality     | Genome-fragment | 2.61  | 0     |
| S9-final-viral-combined_k141_105143]] [full    | 2178  | No  | NA | 0 | 1              | Low-quality     | Genome-fragment | 4.79  | 0     |
| S17-final-viral-combined_k141_126588]] [full   | 1072  | No  | NA | 0 | 1              | Not-determined  | Genome-fragment | NA    | 4.38  |
| S7-final-viral-combined_k141_195391]] [full    | 2178  | No  | NA | 0 | 0              | Low-quality     | Genome-fragment | NA    | 0     |
| S17-final-viral-combined_k141_82436]] [full    | 2463  | No  | NA | 0 | 2              | Not-determined  | Genome-fragment | NA    | 0     |
| S17-final-viral-combined_k141_126600]] [full   | 8530  | No  | NA | 1 | 3              | High-quality    | Genome-fragment | 100   | 0     |
| S17-final-viral-combined_k141_259111]] [full   | 2722  | No  | NA | 0 | 3              | Not-determined  | Genome-fragment | NA    | 0     |
| S7-final-viral-combined_k141_75844]] [full     | 2178  | No  | NA | 2 | 0              | Low-quality     | Genome-fragment | 5.33  | 0     |
| S7_k141_150781                                 | 2178  | No  | NA | 0 | 1              | Low-quality     | Genome-fragment | 5.58  | 0     |
| S17-final-viral-combined_k141_181809]] [full   | 2178  | Yes | NA | 1 | 1              | Low-quality     | Genome-fragment | 0.17  | 85.4  |
| S17-final-viral-combined_k141_116230]] [full   | 4158  | No  | NA | 0 | 3              | Not-determined  | Genome-fragment | NA    | 1.39  |
| S17-final-viral-combined_k141_249784]] [full   | 2178  | No  | NA | 0 | 1              | Low-quality     | Genome-fragment | NA    | 0     |
| S17-final-viral-combined_k141_71028]] [full    | 1576  | No  | NA | 0 | 1              | Not-determined  | Genome-fragment | NA    | 0     |
| S17-final-viral-combined_k141_249671]] [H2gene | 2178  | No  | NA | 1 | 0              | Low-quality     | Genome-fragment | 3.18  | 0     |
| S17-final-viral-combined_k141_137654]] [full   | 2521  | No  | NA | 0 | 1              | Not-determined  | Genome-fragment | NA    | 0     |
| S17-final-viral-combined_k141_37471]] [full    | 2462  | No  | NA | 0 | 1              | Not-determined  | Genome-fragment | NA    | 0     |
| S4_k141_47298                                  | 2178  | No  | NA | 0 | 0              | Low-quality     | Genome-fragment | 2.68  | 0     |
| S1-final-viral-combined_k141_366412]] [full    | 2179  | No  | NA | 1 | 0              | Low-quality     | Genome-fragment | 2.93  | 0     |
| S17-final-viral-combined_k141_59309]] [full    | 3490  | No  | NA | 0 | 2              | Not-determined  | Genome-fragment | NA    | 0     |
| S5-final-viral-combined_k141_21979]] [full     | 2179  | No  | NA | 2 | 0              | Low-quality     | Genome-fragment | 3.3   | 0     |
| S17-final-viral-combined_k141_91976]] [full    | 3647  | No  | NA | 2 | 2              | Not-determined  | Genome-fragment | NA    | 0     |
| S17-final-viral-combined_k141_126612]] [full   | 1665  | No  | NA | 0 | 1              | Not-determined  | Genome-fragment | NA    | 0     |
| S5-final-viral-combined_k141_152270]] [full    | 2179  | No  | NA | 2 | 0              | Low-quality     | Genome-fragment | 3.26  | 0     |
| S4-final-viral-combined_k141_92041]] [full     | 2179  | No  | NA | 0 | 0              | Low-quality     | Genome-fragment | 5.97  | 0     |
| S17-final-viral-combined_k141_99114]] [full    | 3270  | No  | NA | 0 | 2              | Not-determined  | Genome-fragment | NA    | 0     |
| S5-final-viral-combined_k141_127872]] [full    | 2180  | No  | NA | 2 | 0              | Low-quality     | Genome-fragment | 6.39  | 0     |
| S17-final-viral-combined_k141_36790]] [full    |       |     |    |   |                |                 |                 |       |       |



|                                      |       |     |      |   |    |                |                 |      |       |
|--------------------------------------|-------|-----|------|---|----|----------------|-----------------|------|-------|
| S7_k141_211150                       | 2184  | No  | NA   | 0 | 0  | Low-quality    | Genome-fragment | 0.4  | 0     |
| S17-final-viral-combined_k141_170860 | 1512  | No  | NA   | 0 | 0  | Not-determined | Genome-fragment | NA   | 0     |
| S17-final-viral-combined_k141_170865 | 1166  | No  | NA   | 0 | 0  | Not-determined | Genome-fragment | NA   | 0     |
| S17-final-viral-combined_k141_237336 | 1092  | No  | NA   | 0 | 1  | Not-determined | Genome-fragment | NA   | 0     |
| S17-final-viral-combined_k141_30494  | 2184  | No  | NA   | 2 | 0  | Low-quality    | Genome-fragment | 5.2  | 0     |
| S17-final-viral-combined_k141_104098 | 6130  | No  | NA   | 0 | 1  | Not-determined | Genome-fragment | NA   | 0     |
| S17-final-viral-combined_k141_82737  | 1523  | No  | NA   | 0 | 1  | Not-determined | Genome-fragment | NA   | 0     |
| S12-final-viral-combined_k141_152932 | 2184  | No  | NA   | 0 | 2  | Low-quality    | Genome-fragment | 1.25 | 0     |
| S17-final-viral-combined_k141_224935 | 5085  | No  | NA   | 0 | 0  | Not-determined | Genome-fragment | NA   | 0     |
| S2-final-viral-combined_k141_170698  | 2184  | No  | NA   | 1 | 0  | Low-quality    | Genome-fragment | 1.38 | 0     |
| S17-final-viral-combined_k141_148886 | 4362  | No  | NA   | 0 | 0  | Not-determined | Genome-fragment | NA   | 0     |
| S8-final-viral-combined_k141_192790  | 2184  | No  | NA   | 0 | 1  | Low-quality    | Genome-fragment | 1.05 | 0     |
| S4_k141_81160                        | 2185  | No  | NA   | 0 | 0  | Low-quality    | Genome-fragment | 2.25 | 0     |
| S17-final-viral-combined_k141_82779  | 1153  | No  | NA   | 0 | 1  | Not-determined | Genome-fragment | NA   | 0     |
| S17-final-viral-combined_k141_104156 | 1734  | No  | NA   | 0 | 3  | Not-determined | Genome-fragment | NA   | 0     |
| S17-final-viral-combined_k141_181580 | 5257  | No  | NA   | 0 | 1  | Not-determined | Genome-fragment | NA   | 0     |
| S17-final-viral-combined_k141_237359 | 5197  | No  | NA   | 0 | 3  | Not-determined | Genome-fragment | NA   | 0     |
| S14-final-viral-combined_k141_156946 | 2186  | No  | NA   | 0 | 0  | Low-quality    | Genome-fragment | 5.35 | 0     |
| S17-final-viral-combined_k141_71332  | 1247  | No  | NA   | 0 | 0  | Not-determined | Genome-fragment | NA   | 0     |
| S5-final-viral-combined_k141_190324  | 2186  | No  | NA   | 0 | 0  | Low-quality    | Genome-fragment | 3.87 | 0     |
| S17-final-viral-combined_k141_82797  | 17582 | No  | NA   | 0 | 9  | Not-determined | Genome-fragment | NA   | 0     |
| S7-final-viral-combined_k141_215219  | 2186  | No  | NA   | 0 | 0  | Low-quality    | Genome-fragment | 2.85 | 0     |
| S17-final-viral-combined_k141_216051 | 1397  | No  | NA   | 0 | 1  | Not-determined | Genome-fragment | NA   | 0     |
| S17-final-viral-combined_k141_84850  | 2186  | No  | NA   | 0 | 3  | Low-quality    | Genome-fragment | 0.64 | 0     |
| S17-final-viral-combined_k141_26176  | 1646  | No  | NA   | 0 | 1  | Not-determined | Genome-fragment | NA   | 0     |
| S12-final-viral-combined_k141_271017 | 2186  | No  | NA   | 0 | 0  | Low-quality    | Genome-fragment | 4.77 | 0     |
| S17-final-viral-combined_k141_40221  | 4732  | No  | NA   | 0 | 0  | Not-determined | Genome-fragment | NA   | 0     |
| S17-final-viral-combined_k141_237391 | 4895  | No  | NA   | 0 | 0  | Not-determined | Genome-fragment | NA   | 0     |
| S17-final-viral-combined_k141_402091 | 3463  | No  | NA   | 0 | 3  | Not-determined | Genome-fragment | NA   | 0     |
| S12-final-viral-combined_k141_328969 | 2186  | No  | NA   | 0 | 0  | Low-quality    | Genome-fragment | 5.76 | 0     |
| S17-final-viral-combined_k141_182613 | 6964  | No  | NA   | 0 | 0  | Not-determined | Genome-fragment | NA   | 0     |
| S9-final-viral-combined_k141_107910  | 2187  | No  | NA   | 0 | 0  | Low-quality    | Genome-fragment | 5.44 | 0     |
| S17-final-viral-combined_k141_204734 | 2306  | No  | NA   | 2 | 1  | Not-determined | Genome-fragment | NA   | 0     |
| S17-final-viral-combined_k141_207265 | 2187  | No  | NA   | 2 | 0  | Low-quality    | Genome-fragment | 5.19 | 0     |
| S17-final-viral-combined_k141_237416 | 1509  | No  | NA   | 0 | 0  | Not-determined | Genome-fragment | NA   | 0     |
| S17-final-viral-combined_k141_237417 | 3273  | No  | NA   | 0 | 1  | Not-determined | Genome-fragment | NA   | 0     |
| S2-final-viral-combined_k141_65162   | 2187  | No  | NA   | 1 | 0  | Low-quality    | Genome-fragment | 0.78 | 0     |
| S4-final-viral-combined_k141_115975  | 2187  | No  | NA   | 0 | 2  | Low-quality    | Genome-fragment | 0.74 | 0     |
| S17-final-viral-combined_k141_181641 | 1084  | No  | NA   | 0 | 0  | Not-determined | Genome-fragment | NA   | 0     |
| S11-final-viral-combined_k141_13660  | 2188  | No  | NA   | 0 | 0  | Low-quality    | Genome-fragment | 3.46 | 0     |
| S17-final-viral-combined_k141_126774 | 66657 | No  | NA   | 3 | 11 | High-quality   | High-quality    | 100  | 0     |
| S5-final-viral-combined_k141_141010  | 2188  | No  | NA   | 0 | 0  | Low-quality    | Genome-fragment | 4.4  | 0     |
| S17-final-viral-combined_k141_126782 | 1511  | No  | NA   | 0 | 2  | Not-determined | Genome-fragment | NA   | 0     |
| S17-final-viral-combined_k141_116621 | 1334  | No  | NA   | 0 | 0  | Not-determined | Genome-fragment | NA   | 0     |
| S12-final-viral-combined_k141_205627 | 2188  | No  | NA   | 0 | 0  | Low-quality    | Genome-fragment | 3.8  | 0     |
| S6-final-viral-combined_k141_18448   | 2188  | No  | NA   | 0 | 1  | Low-quality    | Genome-fragment | 1.64 | 0     |
| S17-final-viral-combined_k141_145761 | 2340  | No  | NA   | 0 | 1  | Not-determined | Genome-fragment | NA   | 0     |
| S8-final-viral-combined_k141_9460    | 2188  | No  | NA   | 0 | 1  | Low-quality    | Genome-fragment | 0.5  | 0     |
| S17-final-viral-combined_k141_116641 | 3500  | No  | NA   | 0 | 1  | Not-determined | Genome-fragment | NA   | 0     |
| S9-final-viral-combined_k141_20878   | 2189  | No  | NA   | 0 | 1  | Low-quality    | Genome-fragment | 2.33 | 0     |
| S17-final-viral-combined_k141_237474 | 3144  | No  | NA   | 0 | 3  | Not-determined | Genome-fragment | NA   | 0     |
| S12-final-viral-combined_k141_128455 | 2189  | No  | NA   | 0 | 0  | Low-quality    | Genome-fragment | 5.86 | 0     |
| S17-final-viral-combined_k141_248042 | 1359  | No  | NA   | 1 | 0  | Not-determined | Genome-fragment | NA   | 0     |
| S17-final-viral-combined_k141_82947  | 3575  | No  | NA   | 0 | 0  | Not-determined | Genome-fragment | NA   | 0     |
| S17-final-viral-combined_k141_104279 | 1287  | No  | NA   | 0 | 0  | Not-determined | Genome-fragment | NA   | 0     |
| S17-final-viral-combined_k141_171025 | 1348  | No  | NA   | 0 | 0  | Not-determined | Genome-fragment | NA   | 0     |
| S17-final-viral-combined_k141_47304  | 2927  | No  | NA   | 0 | 0  | Not-determined | Genome-fragment | NA   | 0     |
| S2-final-viral-combined_k141_209596  | 2189  | No  | NA   | 0 | 0  | Low-quality    | Genome-fragment | 5.06 | 0     |
| S4-final-viral-combined_k141_145190  | 2189  | No  | NA   | 0 | 0  | Low-quality    | Genome-fragment | 3.03 | 0     |
| S1_k141_330017                       | 2190  | No  | NA   | 0 | 2  | Low-quality    | Genome-fragment | 0.97 | 0     |
| S17-final-viral-combined_k141_83019  | 2937  | No  | NA   | 0 | 3  | Not-determined | Genome-fragment | NA   | 0     |
| S3-final-viral-combined_k141_36216   | 2194  | No  | NA   | 0 | 1  | Not-determined | Genome-fragment | NA   | 0     |
| S17-final-viral-combined_k141_104313 | 2190  | No  | NA   | 0 | 0  | Low-quality    | Genome-fragment | 1.45 | 0     |
| S17-final-viral-combined_k141_59819  | 1447  | No  | NA   | 0 | 0  | Not-determined | Genome-fragment | NA   | 0     |
| S17-final-viral-combined_k141_237582 | 7016  | No  | NA   | 4 | 4  | Not-determined | Genome-fragment | NA   | 0     |
| S12-final-viral-combined_k141_268939 | 11800 | No  | NA   | 0 | 2  | Not-determined | Genome-fragment | NA   | 0     |
| S12-final-viral-combined_k141_205931 | 2190  | No  | NA   | 0 | 2  | Low-quality    | Genome-fragment | 1.29 | 0     |
| S17-final-viral-combined_k141_248106 | 2190  | No  | NA   | 0 | 0  | Low-quality    | Genome-fragment | 4.87 | 0     |
| S17-final-viral-combined_k141_14661  | 2255  | No  | NA   | 0 | 2  | Not-determined | Genome-fragment | NA   | 0     |
| S17-final-viral-combined_k141_14661  | 2982  | No  | NA   | 0 | 3  | Not-determined | Genome-fragment | NA   | 0     |
| S17-final-viral-combined_k141_204809 | 11384 | No  | NA   | 0 | 8  | Not-determined | Genome-fragment | NA   | 0     |
| S17-final-viral-combined_k141_14682  | 1595  | No  | NA   | 2 | 2  | Not-determined | Genome-fragment | NA   | 0     |
| S2-final-viral-combined_k141_18787   | 2190  | No  | NA   | 0 | 0  | Low-quality    | Genome-fragment | 1.43 | 0     |
| S3_k141_76712                        | 2191  | No  | NA   | 0 | 2  | Low-quality    | Genome-fragment | 1.25 | 0     |
| S7_k141_159063                       | 2191  | No  | NA   | 0 | 1  | Low-quality    | Genome-fragment | 4.62 | 0     |
| S17-final-viral-combined_k141_59688  | 2408  | No  | NA   | 0 | 1  | Not-determined | Genome-fragment | NA   | 0     |
| S17-final-viral-combined_k141_259352 | 7002  | No  | NA   | 0 | 4  | Not-determined | Genome-fragment | NA   | 0     |
| S17-final-viral-combined_k141_248153 | 1048  | No  | NA   | 0 | 2  | Not-determined | Genome-fragment | NA   | 0     |
| S17-final-viral-combined_k141_149035 | 1246  | No  | NA   | 0 | 0  | Not-determined | Genome-fragment | NA   | 0     |
| S12-final-viral-combined_k141_22358  | 2191  | No  | NA   | 0 | 0  | Low-quality    | Genome-fragment | 3.3  | 0     |
| S17-final-viral-combined_k141_137945 | 1150  | No  | NA   | 0 | 1  | Not-determined | Genome-fragment | NA   | 0     |
| S17-final-viral-combined_k141_71454  | 2821  | No  | NA   | 0 | 1  | Not-determined | Genome-fragment | NA   | 0     |
| S12_k141_105647                      | 2191  | No  | NA   | 1 | 0  | Low-quality    | Genome-fragment | 2.33 | 0     |
| S2-final-viral-combined_k141_138999  | 2191  | No  | NA   | 0 | 0  | Low-quality    | Genome-fragment | 5.73 | 0     |
| S17-final-viral-combined_k141_159191 | 1882  | No  | NA   | 0 | 2  | Not-determined | Genome-fragment | NA   | 0     |
| S1-final-viral-combined_k141_309347  | 2192  | No  | NA   | 0 | 0  | Low-quality    | Genome-fragment | 5.74 | 0     |
| S7-final-viral-combined_k141_197841  | 2192  | No  | NA   | 0 | 0  | Low-quality    | Genome-fragment | 3.42 | 0     |
| S8-final-viral-combined_k141_171522  | 2192  | No  | NA   | 2 | 0  | Low-quality    | Genome-fragment | 2.7  | 0     |
| S11-final-viral-combined_k141_200760 | 2193  | No  | NA   | 0 | 1  | Low-quality    | Genome-fragment | 3.64 | 0     |
| S17-final-viral-combined_k141_248251 | 2228  | No  | NA   | 0 | 3  | Not-determined | Genome-fragment | NA   | 0     |
| S11-final-viral-combined_k141_196227 | 2193  | No  | NA   | 0 | 1  | Low-quality    | Genome-fragment | 1.27 | 0     |
| S17-final-viral-combined_k141_182899 | 3189  | No  | NA   | 0 | 3  | Not-determined | Genome-fragment | NA   | 0     |
| S1_k141_202268                       | 2193  | No  | NA   | 0 | 1  | Low-quality    | Genome-fragment | 1.01 | 0     |
| S17-final-viral-combined_k141_92433  | 6429  | No  | NA   | 0 | 0  | Not-determined | Genome-fragment | NA   | 0     |
| S17-final-viral-combined_k141_31861  | 2193  | No  | NA   | 3 | 1  | Low-quality    | Genome-fragment | 3.17 | 0     |
| S17-final-viral-combined_k141_37654  | 2432  | No  | NA   | 0 | 0  | Not-determined | Genome-fragment | NA   | 0     |
| S17-final-viral-combined_k141_216296 | 1973  | No  | NA   | 0 | 2  | Not-determined | Genome-fragment | NA   | 0     |
| S17-final-viral-combined_k141_30853  | 2193  | No  | NA   | 0 | 2  | Low-quality    | Genome-fragment | 1.08 | 0     |
| S12-final-viral-combined_k141_101036 | 2193  | No  | NA   | 0 | 1  | Low-quality    | Genome-fragment | 3.74 | 0     |
| S17-final-viral-combined_k141_59801  | 7164  | No  | NA   | 0 | 3  | Not-determined | Genome-fragment | NA   | 0     |
| S12-final-viral-combined_k141_146071 | 2193  | No  | NA   | 0 | 0  | Low-quality    | Genome-fragment | 3.45 | 0     |
| S17-final-viral-combined_k141_237692 | 1294  | No  | NA   | 0 | 1  | Not-determined | Genome-fragment | NA   | 0     |
| S17-final-viral-combined_k141_149168 | 1930  | No  | NA   | 0 | 1  | Not-determined | Genome-fragment | NA   | 0     |
| S17-final-viral-combined_k141_227394 | 1435  | No  | NA   | 0 | 1  | Not-determined | Genome-fragment | NA   | 0     |
| S2-final-viral-combined_k141_121931  | 2193  | No  | NA   | 0 | 0  | Low-quality    | Genome-fragment | 3.96 | 0     |
| S8-final-viral-combined_k141_247573  | 2193  | No  | NA   | 0 | 1  | Low-quality    | Genome-fragment | 1.38 | 0     |
| S17-final-viral-combined_k141_193896 | 1727  | No  | NA   | 0 | 1  | Not-determined | Genome-fragment | NA   | 0     |
| S5-final-viral-combined_k141_146041  | 2194  | No  | NA   | 1 | 0  | Low-quality    | Genome-fragment | 4.32 | 0     |
| S17-final-viral-combined_k141_474841 | 3779  | No  | NA   | 0 | 0  | Not-determined | Genome-fragment | NA   | 0     |
| S5-final-viral-combined_k141_211010  | 2194  | No  | NA   | 0 | 0  | Low-quality    | Genome-fragment | 3.74 | 0     |
| S17-final-viral-combined_k141_117684 | 2194  | No  | NA   | 1 | 0  | Low-quality    | Genome-fragment | 0.89 | 0     |
| S17-final-viral-combined_k141_377241 | 2442  | No  | NA   | 0 | 1  | Not-determined | Genome-fragment | NA   | 0     |
| S2-final-viral-combined_k141_100294  | 2194  | No  | NA   | 0 | 1  | Low-quality    | Genome-fragment | 2.34 | 0     |
| S17-final-viral-combined_k141_117023 | 2381  | No  | NA   | 0 | 1  | Not-determined | Genome-fragment | NA   | 0     |
| S17-final-viral-combined_k141_474951 | 12375 | No  | NA   | 2 | 2  | Not-determined | Genome-fragment | NA   | 0     |
| S2-final-viral-combined_k141_101548  | 2194  | No  | NA   | 3 | 0  | Low-quality    | Genome-fragment | 5.25 | 0     |
| S17-final-viral-combined_k141_14811  | 3738  | No  | NA   | 0 | 4  | Not-determined | Genome-fragment | NA   | 0     |
| S17-final-viral-combined_k141_26521  | 7770  | No  | NA   | 0 | 6  | Not-determined | Genome-fragment | NA   | 0     |
| S17-final-viral-combined_k141_127022 | 2515  | No  | NA   | 0 | 1  | Not-determined | Genome-fragment | NA   | 0     |
| S17-final-viral-combined_k141_227491 | 1282  | No  | NA   | 0 | 0  | Not-determined | Genome-fragment | NA   | 0     |
| S17-final-viral-combined_k141_47522  | 1511  | No  | NA   | 0 | 1  | Not-determined | Genome-fragment | NA   | 0     |
| S17-final-viral-combined_k141_227518 | 1286  | No  | NA   | 0 | 1  | Not-determined | Genome-fragment | NA   | 0     |
| S4-final-viral-combined_k141_148887  | 2194  | Yes | 1591 | 1 | 1  | Low-quality    | Genome-fragment | 3.64 | 27.48 |
| S4-final-viral-combined_k141_719151  | 2194  | No  | NA   | 0 | 2  | Low-quality    | Genome-fragment | 1.55 | 0     |
| S17-final-viral-combined_k141_715231 | 1109  | No  | NA   | 0 | 0  | Not-determined | Genome-fragment | NA   | 0     |
| S17-final-viral-combined_k141_83278  | 4083  | No  | NA   | 0 | 1  | Not-determined | Genome-fragment | NA   | 0     |
| S8-final-viral-combined_k141_185379  | 2194  | No  | NA   | 3 | 0  | Low-quality    | Genome-fragment | 5.36 | 0     |
| S8-final-viral-combined_k141_214599  | 2194  | No  | NA   | 0 | 0  | Low-quality    | Genome-fragment | 4.66 | 0     |
| S12-final-viral-combined_k141_241695 | 2195  | No  | NA   | 1 | 0  | Low-quality    | Genome-fragment | 5.73 | 0     |
| S2_k141_211349                       | 2195  | No  | NA   | 0 | 0  | Low-quality    | Genome-fragment | 5.61 | 0     |
| S17-final-viral-combined_k141_183064 | 1057  | No  | NA   | 0 | 1  | Not-determined | Genome-fragment | NA   | 0     |
| S9_k141_51489                        | 2196  | No  | NA   | 3 | 0  | Low-quality    | Genome-fragment | 4.99 | 0     |
| S17-final-viral-combined_k141_71565  | 1888  | No  | NA   | 0 | 0  | Not-determined | Genome-fragment | NA   | 0     |
| S11-final-viral-combined_k141_49018  | 2196  | No  | NA   | 0 | 1  | Low-quality    | Genome-fragment | 3.34 | 0     |
| S17-final-viral-combined_k141_149322 | 3316  | No  | NA   | 0 | 2  | Not-determined | Genome-fragment | NA   | 0     |
| S17-final-viral-combined_k141_205172 | 2189  | No  | NA   | 0 | 2  | Not-determined | Genome-fragment | NA   | 0     |
| S17-final-viral-combined_k141_216415 | 5952  | No  | NA   | 0 | 3  | Not-determined | Genome-fragment | NA   | 0     |
| S17-final-viral-combined_k141_150793 | 21    |     |      |   |    |                |                 |      |       |



|                                      |          |        |     |       |    |    |                   |                 |       |       |
|--------------------------------------|----------|--------|-----|-------|----|----|-------------------|-----------------|-------|-------|
| S12-final-viral-combined_k141_339030 | [full]   | 2201   | No  | NA    | 0  | 0  | Low-quality       | Genome-fragment | 0.83  | 0     |
| S17-final-viral-combined_k141_216594 | [full]   | 2625   | No  | NA    | 0  | 0  | Not-determined    | Genome-fragment | NA    | 0     |
| S17-final-viral-combined_k141_193958 | [full]   | 101082 | Yes | 35929 | 15 | 32 | High-quality      | High-quality    | 100   | 64.46 |
| S12-final-viral-combined_k141_346376 | [full]   | 2201   | No  | NA    | 0  | 0  | 1 Low-quality     | Genome-fragment | 2.44  | 0     |
| S12-final-viral-combined_k141_366769 | [full]   | 2201   | No  | NA    | 0  | 0  | 1 Low-quality     | Genome-fragment | 1.26  | 0     |
| S2-final-viral-combined_k141_137877  | [full]   | 2201   | No  | NA    | 1  | 0  | 0 Low-quality     | Genome-fragment | 3.44  | 0     |
| S17-final-viral-combined_k141_159685 | [full]   | 3627   | No  | NA    | 0  | 0  | 1 Not-determined  | Genome-fragment | NA    | 0     |
| S17-final-viral-combined_k141_92665  | [full]   | 2174   | No  | NA    | 0  | 0  | 1 Not-determined  | Genome-fragment | NA    | 0     |
| S17-final-viral-combined_k141_37908  | [full]   | 1542   | No  | NA    | 0  | 0  | 1 Not-determined  | Genome-fragment | NA    | 0     |
| S17-final-viral-combined_k141_216630 | [full]   | 2223   | No  | NA    | 0  | 0  | 2 Not-determined  | Genome-fragment | NA    | 0     |
| S17-final-viral-combined_k141_237856 | [full]   | 4494   | No  | NA    | 0  | 0  | 1 Not-determined  | Genome-fragment | NA    | 0     |
| S17-final-viral-combined_k141_159091 | [full]   | 1721   | No  | NA    | 0  | 0  | 2 Not-determined  | Genome-fragment | NA    | 0     |
| S17-final-viral-combined_k141_104657 | [full]   | 3049   | No  | NA    | 0  | 0  | 2 Not-determined  | Genome-fragment | NA    | 0     |
| S9-final-viral-combined_k141_123594  | [full]   | 2202   | No  | NA    | 1  | 0  | 0 Low-quality     | Genome-fragment | 4.75  | 0     |
| S17-final-viral-combined_k141_159706 | [full]   | 1089   | No  | NA    | 0  | 0  | 1 Not-determined  | Genome-fragment | NA    | 0     |
| S9-final-viral-combined_k141_127148  | [full]   | 2202   | No  | NA    | 2  | 0  | 0 Low-quality     | Genome-fragment | 2.02  | 0     |
| S1-final-viral-combined_k141_366982  | [full]   | 2202   | No  | NA    | 1  | 0  | 0 Low-quality     | Genome-fragment | 5.21  | 0     |
| S17-final-viral-combined_k141_227813 | [full]   | 3185   | No  | NA    | 0  | 0  | 2 Not-determined  | Genome-fragment | NA    | 0     |
| S17-final-viral-combined_k141_145979 | [full]   | 8469   | No  | NA    | 0  | 0  | 3 Not-determined  | Genome-fragment | NA    | 0     |
| S1-final-viral-combined_k141_113540  | [full]   | 2202   | No  | NA    | 3  | 0  | 0 Low-quality     | Genome-fragment | 4.71  | 0     |
| S17-final-viral-combined_k141_37969  | [full]   | 1646   | No  | NA    | 0  | 0  | 1 Not-determined  | Genome-fragment | NA    | 0     |
| S17-final-viral-combined_k141_47697  | [full]   | 1702   | No  | NA    | 0  | 0  | 2 Not-determined  | Genome-fragment | NA    | 0     |
| S17-final-viral-combined_k141_227825 | [full]   | 4502   | No  | NA    | 0  | 0  | 5 Not-determined  | Genome-fragment | NA    | 0     |
| S12-final-viral-combined_k141_204964 | [full]   | 2202   | No  | NA    | 0  | 0  | 0 Low-quality     | Genome-fragment | 0.57  | 0     |
| S2-final-viral-combined_k141_186736  | [full]   | 2202   | No  | NA    | 0  | 0  | 0 Low-quality     | Genome-fragment | 4.54  | 0     |
| S2-final-viral-combined_k141_155748  | [full]   | 2202   | No  | NA    | 2  | 0  | 0 Low-quality     | Genome-fragment | 5.05  | 0     |
| S4-final-viral-combined_k141_138984  | [full]   | 2202   | No  | NA    | 1  | 0  | 0 Low-quality     | Genome-fragment | 3.33  | 0     |
| S17-final-viral-combined_k141_159738 | [full]   | 1543   | No  | NA    | 0  | 0  | 1 Not-determined  | Genome-fragment | NA    | 0     |
| S17-final-viral-combined_k141_205494 | [full]   | 1985   | No  | NA    | 0  | 0  | 0 Not-determined  | Genome-fragment | NA    | 0     |
| S9-final-viral-combined_k141_124367  | [full]   | 2203   | No  | NA    | 2  | 0  | 0 Low-quality     | Genome-fragment | 4.86  | 0     |
| S11-final-viral-combined_k141_194059 | [full]   | 2203   | No  | NA    | 1  | 0  | 0 Low-quality     | Genome-fragment | 1.11  | 0     |
| S17-final-viral-combined_k141_71781  | [full]   | 3751   | No  | NA    | 0  | 0  | 0 Not-determined  | Genome-fragment | NA    | 0     |
| S17-final-viral-combined_k141_26863  | [full]   | 2579   | No  | NA    | 0  | 0  | 3 Not-determined  | Genome-fragment | NA    | 0     |
| S17-final-viral-combined_k141_248546 | [full]   | 2232   | No  | NA    | 0  | 0  | 1 Not-determined  | Genome-fragment | NA    | 0     |
| S17-final-viral-combined_k141_47737  | [full]   | 1185   | No  | NA    | 0  | 0  | 0 Not-determined  | Genome-fragment | NA    | 0     |
| S11-final-viral-combined_k141_284079 | [full]   | 2203   | No  | NA    | 0  | 0  | 1 Low-quality     | Genome-fragment | 1.18  | 0     |
| S17-final-viral-combined_k141_51773  | [full]   | 2203   | No  | NA    | 0  | 0  | 0 Low-quality     | Genome-fragment | 3.35  | 0     |
| S2-final-viral-combined_k141_138401  | [full]   | 2203   | No  | NA    | 1  | 0  | 0 Low-quality     | Genome-fragment | 4.51  | 0     |
| S4-final-viral-combined_k141_86666   | [full]   | 2203   | No  | NA    | 0  | 0  | 3 Low-quality     | Genome-fragment | 3.85  | 0     |
| S17-final-viral-combined_k141_83583  | [full]   | 1888   | No  | NA    | 0  | 0  | 1 Not-determined  | Genome-fragment | NA    | 0     |
| S11_k141_322994                      |          | 2204   | No  | NA    | 0  | 0  | 0 Low-quality     | Genome-fragment | 2.34  | 0     |
| S17-final-viral-combined_k141_194040 | [full]   | 2357   | No  | NA    | 0  | 0  | 0 Not-determined  | Genome-fragment | NA    | 0     |
| S17-final-viral-combined_k141_215055 | [full]   | 2204   | No  | NA    | 2  | 0  | 0 Low-quality     | Genome-fragment | 5.43  | 0     |
| S17-final-viral-combined_k141_83597  | [full]   | 3537   | No  | NA    | 0  | 0  | 0 Not-determined  | Genome-fragment | NA    | 0     |
| S17-final-viral-combined_k141_205462 | [full]   | 5437   | No  | NA    | 0  | 0  | 0 Not-determined  | Genome-fragment | NA    | 0     |
| S17-final-viral-combined_k141_127404 | [full]   | 9624   | No  | NA    | 0  | 0  | 7 Not-determined  | Genome-fragment | NA    | 0     |
| S12_k141_274637                      |          | 2204   | No  | NA    | 0  | 0  | 0 Low-quality     | Genome-fragment | 6.32  | 0     |
| S17-final-viral-combined_k141_149593 | [full]   | 1632   | No  | NA    | 0  | 0  | 1 Not-determined  | Genome-fragment | NA    | 0     |
| S2-final-viral-combined_k141_207297  | [full]   | 2204   | No  | NA    | 0  | 0  | 0 Low-quality     | Genome-fragment | 3.92  | 0     |
| S17-final-viral-combined_k141_83624  | [full]   | 2222   | No  | NA    | 0  | 0  | 2 Not-determined  | Genome-fragment | NA    | 0     |
| S17-final-viral-combined_k141_227935 | [full]   | 3802   | No  | NA    | 0  | 0  | 3 Not-determined  | Genome-fragment | NA    | 0     |
| S2-final-viral-combined_k141_231212  | [full]   | 2204   | No  | NA    | 0  | 0  | 2 Low-quality     | Genome-fragment | 2.48  | 0     |
| S2-final-viral-combined_k141_244911  | [full]   | 2204   | No  | NA    | 0  | 0  | 2 Low-quality     | Genome-fragment | 2.73  | 0     |
| S17-final-viral-combined_k141_47824  | [full]   | 2474   | No  | NA    | 0  | 0  | 1 Not-determined  | Genome-fragment | NA    | 0     |
| S17-final-viral-combined_k141_227962 | [full]   | 2789   | No  | NA    | 0  | 0  | 0 Not-determined  | Genome-fragment | NA    | 0     |
| S4_k141_27080                        |          | 2204   | No  | NA    | 2  | 0  | 0 Low-quality     | Genome-fragment | 1.27  | 0     |
| S17-final-viral-combined_k141_227974 | [full]   | 1933   | No  | NA    | 0  | 0  | 3 Not-determined  | Genome-fragment | NA    | 0     |
| S17-final-viral-combined_k141_159848 | [full]   | 3419   | No  | NA    | 0  | 0  | 0 Not-determined  | Genome-fragment | NA    | 0     |
| S11-final-viral-combined_k141_257065 | [full]   | 2205   | No  | NA    | 0  | 0  | 0 Low-quality     | Genome-fragment | 1.14  | 0     |
| S17-final-viral-combined_k141_194178 | [full]   | 5293   | No  | NA    | 0  | 0  | 0 Not-determined  | Genome-fragment | NA    | 0     |
| S17-final-viral-combined_k141_127503 | [full]   | 1619   | No  | NA    | 0  | 0  | 1 Not-determined  | Genome-fragment | NA    | 0     |
| S1-final-viral-combined_k141_300433  | [full]   | 2205   | No  | NA    | 0  | 0  | 0 Low-quality     | Genome-fragment | 3.4   | 0     |
| S7-final-viral-combined_k141_167741  | [full]   | 2205   | No  | NA    | 0  | 0  | 2 Low-quality     | Genome-fragment | 0.66  | 0     |
| S17-final-viral-combined_k141_92788  | [full]   | 8364   | No  | NA    | 1  | 0  | 4 Not-determined  | Genome-fragment | NA    | 0     |
| S12-final-viral-combined_k141_181824 | [full]   | 2205   | Yes | 1051  | 0  | 1  | 1 Low-quality     | Genome-fragment | 0.84  | 52.34 |
| S12-final-viral-combined_k141_355897 | [full]   | 2206   | No  | NA    | 0  | 0  | 1 Low-quality     | Genome-fragment | 2.35  | 0     |
| S12-final-viral-combined_k141_261221 | [full]   | 2206   | No  | NA    | 1  | 0  | 0 Low-quality     | Genome-fragment | 1.46  | 0     |
| S5-final-viral-combined_k141_171725  | [full]   | 2207   | No  | NA    | 0  | 0  | 0 Low-quality     | Genome-fragment | 3.81  | 0     |
| S12-final-viral-combined_k141_234618 | [full]   | 2207   | No  | NA    | 0  | 0  | 0 Low-quality     | Genome-fragment | 5.83  | 0     |
| S12-final-viral-combined_k141_180263 | [full]   | 2207   | No  | NA    | 0  | 0  | 1 Low-quality     | Genome-fragment | 4.52  | 0     |
| S2_k141_9118                         |          | 2207   | No  | NA    | 0  | 0  | 1 Low-quality     | Genome-fragment | 1.97  | 0     |
| S11-final-viral-combined_k141_271242 | [full]   | 2208   | No  | NA    | 0  | 0  | 0 Low-quality     | Genome-fragment | 1.42  | 0     |
| S11-final-viral-combined_k141_314653 | [full]   | 2208   | No  | NA    | 0  | 0  | 0 Low-quality     | Genome-fragment | 3.51  | 0     |
| S17-final-viral-combined_k141_171744 | [full]   | 2352   | No  | NA    | 0  | 0  | 2 Not-determined  | Genome-fragment | NA    | 0     |
| S2-final-viral-combined_k141_147380  | [full]   | 2208   | No  | NA    | 2  | 0  | 0 Low-quality     | Genome-fragment | NA    | 0     |
| S17-final-viral-combined_k141_127551 | [full]   | 1014   | No  | NA    | 0  | 0  | 1 Not-determined  | Genome-fragment | 5.37  | 0     |
| S4-final-viral-combined_k141_350741  | [full]   | 2208   | No  | NA    | 0  | 0  | 0 Low-quality     | Genome-fragment | 4.13  | 0     |
| S17-final-viral-combined_k141_194262 | [full]   | 1618   | No  | NA    | 0  | 0  | 1 Not-determined  | Genome-fragment | NA    | 0     |
| S17-final-viral-combined_k141_194264 | [full]   | 1650   | No  | NA    | 0  | 0  | 1 Not-determined  | Genome-fragment | NA    | 0     |
| S11-final-viral-combined_k141_80967  | [H2gene] | 2209   | No  | NA    | 2  | 0  | 0 Low-quality     | Genome-fragment | 3.48  | 0     |
| S17-final-viral-combined_k141_83764  | [full]   | 1533   | No  | NA    | 0  | 0  | 1 Not-determined  | Genome-fragment | NA    | 0     |
| S3-final-viral-combined_k141_108215  | [full]   | 2209   | No  | NA    | 1  | 0  | 0 Low-quality     | Genome-fragment | 2.41  | 0     |
| S17-final-viral-combined_k141_150900 | [full]   | 2209   | No  | NA    | 1  | 0  | 0 Low-quality     | Genome-fragment | 5.39  | 0     |
| S17-final-viral-combined_k141_127564 | [full]   | 1870   | No  | NA    | 0  | 0  | 1 Not-determined  | Genome-fragment | NA    | 0     |
| S17-final-viral-combined_k141_92810  | [full]   | 40643  | No  | NA    | 0  | 0  | 30 Not-determined | Genome-fragment | NA    | 0     |
| S17-final-viral-combined_k141_194299 | [full]   | 2836   | No  | NA    | 0  | 0  | 3 Not-determined  | Genome-fragment | NA    | 0     |
| S12-final-viral-combined_k141_156882 | [full]   | 2209   | No  | NA    | 0  | 0  | 0 Low-quality     | Genome-fragment | 5.03  | 0     |
| S17-final-viral-combined_k141_216884 | [full]   | 3996   | No  | NA    | 0  | 0  | 2 Not-determined  | Genome-fragment | NA    | 0     |
| S17-final-viral-combined_k141_238015 | [full]   | 1607   | No  | NA    | 0  | 0  | 0 Not-determined  | Genome-fragment | NA    | 0     |
| S17-final-viral-combined_k141_92819  | [full]   | 1995   | No  | NA    | 0  | 0  | 1 Not-determined  | Genome-fragment | NA    | 0     |
| S17-final-viral-combined_k141_205635 | [full]   | 1341   | No  | NA    | 0  | 0  | 2 Not-determined  | Genome-fragment | NA    | 0     |
| S8-final-viral-combined_k141_233481  | [full]   | 2209   | No  | NA    | 0  | 0  | 0 Low-quality     | Genome-fragment | 5.71  | 0     |
| S12-final-viral-combined_k141_276925 | [full]   | 2210   | No  | NA    | 0  | 0  | 0 Low-quality     | Genome-fragment | 4.51  | 0     |
| S4-final-viral-combined_k141_69975   | [full]   | 2210   | No  | NA    | 0  | 0  | 1 Low-quality     | Genome-fragment | 3.62  | 0     |
| S17-final-viral-combined_k141_248768 | [full]   | 2679   | No  | NA    | 0  | 0  | 2 Not-determined  | Genome-fragment | NA    | 0     |
| S17-final-viral-combined_k141_47860  | [full]   | 55026  | No  | NA    | 32 | 0  | 0 Medium-quality  | Genome-fragment | 84.62 | 0     |
| S4_k141_36069                        |          | 2210   | No  | NA    | 1  | 0  | 0 Low-quality     | Genome-fragment | 2.58  | 0     |
| S11-final-viral-combined_k141_143000 | [full]   | 2211   | No  | NA    | 0  | 0  | 1 Low-quality     | Genome-fragment | 1.12  | 0     |
| S3-final-viral-combined_k141_206951  | [full]   | 2211   | No  | NA    | 0  | 0  | 0 Low-quality     | Genome-fragment | 2.89  | 0     |
| S5-final-viral-combined_k141_115988  | [full]   | 2211   | No  | NA    | 0  | 0  | 0 Low-quality     | Genome-fragment | 1.39  | 0     |
| S17-final-viral-combined_k141_103084 | [full]   | 2211   | Yes | 1399  | 1  | 0  | 1 Low-quality     | Genome-fragment | 1.98  | 36.73 |
| S17-final-viral-combined_k141_149755 | [full]   | 3923   | No  | NA    | 0  | 0  | 1 Not-determined  | Genome-fragment | NA    | 0     |
| S17-final-viral-combined_k141_127628 | [full]   | 1025   | No  | NA    | 0  | 0  | 1 Not-determined  | Genome-fragment | NA    | 0     |
| S17-final-viral-combined_k141_47899  | [full]   | 1810   | No  | NA    | 0  | 0  | 1 Not-determined  | Genome-fragment | NA    | 0     |
| S17-final-viral-combined_k141_149789 | [full]   | 2456   | No  | NA    | 0  | 0  | 0 Not-determined  | Genome-fragment | NA    | 0     |
| S17-final-viral-combined_k141_15291  | [full]   | 8254   | No  | NA    | 0  | 0  | 3 Not-determined  | Genome-fragment | NA    | 0     |
| S8-final-viral-combined_k141_246374  | [full]   | 2211   | No  | NA    | 0  | 0  | 2 Low-quality     | Genome-fragment | 1.1   | 0     |
| S1_k141_285073                       |          | 2212   | No  | NA    | 0  | 0  | 0 Low-quality     | Genome-fragment | 3.54  | 0     |
| S17-final-viral-combined_k141_149802 | [full]   | 1415   | No  | NA    | 0  | 0  | 0 Not-determined  | Genome-fragment | NA    | 0     |
| S17-final-viral-combined_k141_15297  | [full]   | 4886   | No  | NA    | 0  | 0  | 0 Not-determined  | Genome-fragment | NA    | 0     |
| S17-final-viral-combined_k141_205725 | [full]   | 1683   | No  | NA    | 0  | 0  | 1 Not-determined  | Genome-fragment | NA    | 0     |
| S17-final-viral-combined_k141_152991 | [full]   | 147    | No  | NA    | 0  | 0  | 2 Not-determined  | Genome-fragment | NA    | 0     |
| S3-final-viral-combined_k141_88474   | [full]   | 2212   | No  | NA    | 0  | 0  | 0 Low-quality     | Genome-fragment | 3.92  | 0     |
| S17-final-viral-combined_k141_160051 | [full]   | 2965   | No  | NA    | 0  | 0  | 3 Not-determined  | Genome-fragment | NA    | 0     |
| S17-final-viral-combined_k141_25981  | [full]   | 6792   | Yes | 48861 | 21 | 0  | 3 Medium-quality  | Genome-fragment | 71.65 | 29.98 |
| S17-final-viral-combined_k141_228178 | [full]   | 1580   | No  | NA    | 0  | 0  | 0 Not-determined  | Genome-fragment | NA    | 0     |
| S11-final-viral-combined_k141_102742 | [full]   | 2213   | No  | NA    | 1  | 0  | 0 Low-quality     | Genome-fragment | 3.3   | 0     |
| S3-final-viral-combined_k141_120606  | [full]   | 2213   | No  | NA    | 2  | 0  | 0 Low-quality     | Genome-fragment | 0.99  | 0     |
| S17-final-viral-combined_k141_127688 | [full]   | 46043  | No  | NA    | 21 | 0  | 1 High-quality    | High-quality    | 94.05 | 0     |
| S17-final-viral-combined_k141_27338  | [full]   | 2213   | No  | NA    | 0  | 0  | 0 Low-quality     | Genome-fragment | 3.6   | 0     |
| S17-final-viral-combined_k141_174638 | [full]   | 2213   | No  | NA    | 0  | 0  | 3 Low-quality     | Genome-fragment | 0.85  | 0     |
| S2_k141_211612                       |          | 2213   | No  | NA    | 2  | 0  | 0 Low-quality     | Genome-fragment | 8.05  | 0     |
| S4_k141_43415                        |          | 2213   | No  | NA    | 0  | 0  | 0 Low-quality     | Genome-fragment | 0.96  | 0     |
| S6-final-viral-combined_k141_101333  | [full]   | 2213   | No  | NA    | 0  | 0  | 0 Low-quality     | Genome-fragment | 3.91  | 0     |
| S9-final-viral-combined_k141_1591    | [full]   | 2214   | No  | NA    | 0  | 0  | 0 Low-quality     | Genome-fragment | 16.78 | 0     |
| S1-final-viral-combined_k141_238973  | [full]   | 2214   | No  | NA    | 0  | 0  | 0 Low-quality     | Genome-fragment | 3.88  | 0     |
| S5-final-viral-combined_k141_132036  | [full]   | 2214   | No  | NA    | 0  | 0  | 0 Low-quality     | Genome-fragment | 4.02  | 0     |



|                                      |          |       |     |      |   |    |                |                 |       |       |
|--------------------------------------|----------|-------|-----|------|---|----|----------------|-----------------|-------|-------|
| S17-final-viral-combined_k141_127849 | [full]   | 1729  | No  | NA   | 0 | 1  | Not-determined | Genome-fragment | NA    | 0     |
| S17-final-viral-combined_k141_206061 | [full]   | 3376  | No  | NA   | 0 | 2  | Not-determined | Genome-fragment | NA    | 0     |
| S17-final-viral-combined_k141_217232 | [full]   | 4400  | No  | NA   | 0 | 3  | Not-determined | Genome-fragment | NA    | 0     |
| S9-final-viral-combined_k141_121890  | [full]   | 2220  | No  | NA   | 0 | 1  | Low-quality    | Genome-fragment | 2.93  | 0     |
| S11-final-viral-combined_k141_99303  | [full]   | 2220  | No  | NA   | 1 | 0  | Low-quality    | Genome-fragment | 5.4   | 0     |
| S17-final-viral-combined_k141_26043  | [full]   | 3662  | No  | NA   | 0 | 2  | Not-determined | Genome-fragment | NA    | 0     |
| S11-final-viral-combined_k141_39638  | [full]   | 2220  | No  | NA   | 2 | 0  | Low-quality    | Genome-fragment | 4.91  | 0     |
| S17-final-viral-combined_k141_150083 | [full]   | 1791  | No  | NA   | 0 | 1  | Not-determined | Genome-fragment | NA    | 0     |
| S1-final-viral-combined_k141_179051  | [full]   | 2220  | No  | NA   | 0 | 2  | Low-quality    | Genome-fragment | 5.13  | 0     |
| S17-final-viral-combined_k141_117949 | [full]   | 5301  | No  | NA   | 0 | 0  | Not-determined | Genome-fragment | NA    | 0     |
| S17-final-viral-combined_k141_194720 | [full]   | 13861 | No  | NA   | 0 | 5  | Not-determined | Genome-fragment | NA    | 0     |
| S2-final-viral-combined_k141_418148  | [full]   | 2220  | No  | NA   | 0 | 0  | Low-quality    | Genome-fragment | 4.97  | 0     |
| S17-final-viral-combined_k141_183988 | [full]   | 2321  | No  | NA   | 0 | 1  | Not-determined | Genome-fragment | NA    | 0     |
| S1-final-viral-combined_k141_197448  | [full]   | 2221  | No  | NA   | 3 | 0  | Low-quality    | Genome-fragment | 5.7   | 0     |
| S17-final-viral-combined_k141_194728 | [full]   | 1840  | No  | NA   | 0 | 1  | Not-determined | Genome-fragment | NA    | 0     |
| S17-final-viral-combined_k141_384601 | [full]   | 1657  | No  | NA   | 2 | 0  | Not-determined | Genome-fragment | NA    | 0     |
| S1-final-viral-combined_k141_124153  | [full]   | 2221  | No  | NA   | 0 | 1  | Low-quality    | Genome-fragment | 2.75  | 0     |
| S17-final-viral-combined_k141_249035 | [full]   | 1854  | No  | NA   | 0 | 0  | Not-determined | Genome-fragment | NA    | 0     |
| S2_k141_152954                       | [full]   | 2221  | No  | NA   | 0 | 1  | Low-quality    | Genome-fragment | 1.34  | 0     |
| S17-final-viral-combined_k141_249036 | [full]   | 1652  | No  | NA   | 0 | 2  | Not-determined | Genome-fragment | NA    | 0     |
| S11_k141_296573                      | [full]   | 2223  | No  | NA   | 0 | 1  | Low-quality    | Genome-fragment | 7.1   | 0     |
| S17-final-viral-combined_k141_38478  | [full]   | 2580  | No  | NA   | 0 | 1  | Not-determined | Genome-fragment | NA    | 0     |
| S17-final-viral-combined_k141_27382  | [full]   | 3198  | No  | NA   | 0 | 2  | Not-determined | Genome-fragment | NA    | 0     |
| S1-final-viral-combined_k141_3559    | [full]   | 2223  | No  | NA   | 0 | 1  | Low-quality    | Genome-fragment | 0.56  | 0     |
| S2-final-viral-combined_k141_62410   | [full]   | 2223  | No  | NA   | 1 | 0  | Low-quality    | Genome-fragment | 1.21  | 0     |
| S2-final-viral-combined_k141_21896   | [full]   | 2223  | No  | NA   | 2 | 0  | Low-quality    | Genome-fragment | 5.56  | 0     |
| S17-final-viral-combined_k141_194743 | [full]   | 17460 | No  | NA   | 0 | 9  | Not-determined | Genome-fragment | NA    | 0     |
| S17-final-viral-combined_k141_72437  | [full]   | 2487  | No  | NA   | 0 | 0  | Not-determined | Genome-fragment | NA    | 0     |
| S17-final-viral-combined_k141_249041 | [full]   | 10224 | No  | NA   | 0 | 3  | Not-determined | Genome-fragment | NA    | 0     |
| S17-final-viral-combined_k141_249049 | [full]   | 1955  | No  | NA   | 0 | 1  | Not-determined | Genome-fragment | NA    | 0     |
| S17-final-viral-combined_k141_56620  | [full]   | 2223  | No  | NA   | 0 | 2  | Low-quality    | Genome-fragment | 0.9   | 0     |
| S17-final-viral-combined_k141_206093 | [full]   | 1702  | No  | NA   | 0 | 0  | Not-determined | Genome-fragment | NA    | 0     |
| S17-final-viral-combined_k141_93132  | [full]   | 2063  | No  | NA   | 0 | 2  | Not-determined | Genome-fragment | NA    | 0     |
| S17-final-viral-combined_k141_172105 | [full]   | 1049  | No  | NA   | 0 | 2  | Not-determined | Genome-fragment | NA    | 0     |
| S17-final-viral-combined_k141_184050 | [full]   | 6028  | No  | NA   | 0 | 4  | Not-determined | Genome-fragment | NA    | 0     |
| S17-final-viral-combined_k141_481161 | [full]   | 1129  | No  | NA   | 0 | 0  | Not-determined | Genome-fragment | NA    | 0     |
| S17-final-viral-combined_k141_217311 | [full]   | 1177  | No  | NA   | 0 | 0  | Not-determined | Genome-fragment | NA    | 0     |
| S12-final-viral-combined_k141_150847 | [full]   | 2223  | No  | NA   | 0 | 0  | Low-quality    | Genome-fragment | 5.62  | 0     |
| S17-final-viral-combined_k141_139180 | [full]   | 1617  | No  | NA   | 0 | 4  | Not-determined | Genome-fragment | NA    | 0     |
| S17-final-viral-combined_k141_48119  | [full]   | 14018 | No  | NA   | 0 | 10 | Not-determined | Genome-fragment | NA    | 0     |
| S17-final-viral-combined_k141_481121 | [full]   | 1774  | No  | NA   | 0 | 1  | Not-determined | Genome-fragment | NA    | 0     |
| S2-final-viral-combined_k141_208842  | [full]   | 2223  | No  | NA   | 0 | 0  | Low-quality    | Genome-fragment | 5.03  | 0     |
| S2-final-viral-combined_k141_65450   | [full]   | 2224  | No  | NA   | 0 | 0  | Low-quality    | Genome-fragment | 3.81  | 0     |
| S17-final-viral-combined_k141_206167 | [full]   | 1046  | No  | NA   | 0 | 1  | Not-determined | Genome-fragment | NA    | 0     |
| S1-final-viral-combined_k141_375313  | [full]   | 2225  | No  | NA   | 0 | 1  | Low-quality    | Genome-fragment | 3.99  | 0     |
| S1_k141_389577                       | [full]   | 2225  | No  | NA   | 0 | 1  | Low-quality    | Genome-fragment | 0.97  | 0     |
| S12-final-viral-combined_k141_340101 | [full]   | 2225  | No  | NA   | 0 | 1  | Low-quality    | Genome-fragment | 3.01  | 0     |
| S17-final-viral-combined_k141_84228  | [full]   | 3480  | No  | NA   | 0 | 2  | Not-determined | Genome-fragment | NA    | 0     |
| S17-final-viral-combined_k141_135071 | [full]   | 2814  | No  | NA   | 0 | 2  | Not-determined | Genome-fragment | NA    | 0     |
| S17-final-viral-combined_k141_38594  | [full]   | 1278  | No  | NA   | 0 | 1  | Not-determined | Genome-fragment | NA    | 0     |
| S17-final-viral-combined_k141_194872 | [full]   | 2754  | No  | NA   | 0 | 3  | Not-determined | Genome-fragment | NA    | 0     |
| S12-final-viral-combined_k141_243062 | [full]   | 2225  | No  | NA   | 0 | 0  | Low-quality    | Genome-fragment | 5.46  | 0     |
| S17-final-viral-combined_k141_93177  | [full]   | 2041  | No  | NA   | 0 | 0  | Not-determined | Genome-fragment | NA    | 0     |
| S17-final-viral-combined_k141_127960 | [full]   | 1449  | No  | NA   | 0 | 3  | Not-determined | Genome-fragment | NA    | 0     |
| S4-final-viral-combined_k141_157108  | [full]   | 2225  | No  | NA   | 2 | 0  | Low-quality    | Genome-fragment | 1.49  | 0     |
| S17-final-viral-combined_k141_160437 | [full]   | 16465 | No  | NA   | 0 | 13 | Not-determined | Genome-fragment | NA    | 0     |
| S8-final-viral-combined_k141_80651   | [full]   | 2225  | No  | NA   | 0 | 1  | Low-quality    | Genome-fragment | 2.59  | 0     |
| S8-final-viral-combined_k141_63118   | [full]   | 2225  | No  | NA   | 1 | 0  | Low-quality    | Genome-fragment | 3.28  | 0     |
| S17-final-viral-combined_k141_194893 | [full]   | 2515  | No  | NA   | 0 | 3  | Not-determined | Genome-fragment | NA    | 0     |
| S17-final-viral-combined_k141_84264  | [full]   | 4777  | No  | NA   | 0 | 5  | Not-determined | Genome-fragment | NA    | 0     |
| S17-final-viral-combined_k141_238602 | [full]   | 1270  | No  | NA   | 0 | 1  | Not-determined | Genome-fragment | NA    | 0     |
| S17-final-viral-combined_k141_238681 | [full]   | 1701  | No  | NA   | 0 | 1  | Not-determined | Genome-fragment | NA    | 0     |
| S17-final-viral-combined_k141_238612 | [full]   | 1678  | No  | NA   | 0 | 1  | Not-determined | Genome-fragment | NA    | 0     |
| S17-final-viral-combined_k141_48214  | [full]   | 1050  | No  | NA   | 0 | 0  | Not-determined | Genome-fragment | NA    | 0     |
| S17-final-viral-combined_k141_59219  | [full]   | 1121  | No  | NA   | 0 | 0  | Not-determined | Genome-fragment | NA    | 0     |
| S17-final-viral-combined_k141_156591 | [full]   | 1239  | No  | NA   | 0 | 0  | Not-determined | Genome-fragment | NA    | 0     |
| S5-final-viral-combined_k141_156346  | [full]   | 2226  | No  | NA   | 0 | 2  | Low-quality    | Genome-fragment | 1.09  | 0     |
| S7-final-viral-combined_k141_94971   | [full]   | 2226  | No  | NA   | 0 | 1  | Low-quality    | Genome-fragment | 6.48  | 0     |
| S12-final-viral-combined_k141_300710 | [full]   | 2226  | No  | NA   | 0 | 1  | Low-quality    | Genome-fragment | 2.17  | 0     |
| S17-final-viral-combined_k141_184109 | [full]   | 1210  | No  | NA   | 0 | 0  | Not-determined | Genome-fragment | NA    | 0     |
| S4_k141_56910                        | [full]   | 2226  | No  | NA   | 0 | 0  | Low-quality    | Genome-fragment | 2.26  | 0     |
| S8-final-viral-combined_k141_12093   | [full]   | 2226  | No  | NA   | 0 | 1  | Low-quality    | Genome-fragment | 3.79  | 0     |
| S11-final-viral-combined_k141_182373 | [full]   | 2227  | No  | NA   | 0 | 0  | Low-quality    | Genome-fragment | 4.65  | 0     |
| S17-final-viral-combined_k141_118144 | [full]   | 5324  | No  | NA   | 0 | 5  | Not-determined | Genome-fragment | NA    | 0     |
| S1-final-viral-combined_k141_297501  | [full]   | 2227  | No  | NA   | 0 | 1  | Low-quality    | Genome-fragment | 6.51  | 0     |
| S3_k141_53929                        | [full]   | 2227  | No  | NA   | 0 | 1  | Low-quality    | Genome-fragment | 1.07  | 0     |
| S17-final-viral-combined_k141_38662  | [full]   | 4929  | No  | NA   | 0 | 2  | Not-determined | Genome-fragment | NA    | 0     |
| S5-final-viral-combined_k141_26199   | [12gene] | 2227  | No  | NA   | 2 | 0  | Low-quality    | Genome-fragment | 6.97  | 0     |
| S12-final-viral-combined_k141_196700 | [full]   | 2227  | No  | NA   | 0 | 0  | Low-quality    | Genome-fragment | 3.61  | 0     |
| S17-final-viral-combined_k141_38671  | [full]   | 2088  | No  | NA   | 0 | 1  | Not-determined | Genome-fragment | NA    | 0     |
| S17-final-viral-combined_k141_128066 | [full]   | 1357  | No  | NA   | 0 | 0  | Not-determined | Genome-fragment | NA    | 0     |
| S17-final-viral-combined_k141_725921 | [full]   | 1552  | No  | NA   | 0 | 1  | Not-determined | Genome-fragment | NA    | 0     |
| S17-final-viral-combined_k141_27581  | [full]   | 3005  | No  | NA   | 0 | 2  | Not-determined | Genome-fragment | NA    | 0     |
| S17-final-viral-combined_k141_38686  | [full]   | 1526  | No  | NA   | 0 | 1  | Not-determined | Genome-fragment | NA    | 0     |
| S2-final-viral-combined_k141_154830  | [full]   | 2227  | No  | NA   | 0 | 0  | Low-quality    | Genome-fragment | 5.12  | 0     |
| S11-final-viral-combined_k141_56923  | [full]   | 2228  | No  | NA   | 0 | 1  | Low-quality    | Genome-fragment | 1.07  | 0     |
| S17-final-viral-combined_k141_38692  | [full]   | 2673  | No  | NA   | 0 | 3  | Not-determined | Genome-fragment | NA    | 0     |
| S5-final-viral-combined_k141_118234  | [full]   | 2228  | No  | NA   | 0 | 2  | Low-quality    | Genome-fragment | 2.26  | 0     |
| S17-final-viral-combined_k141_238075 | [full]   | 7683  | No  | NA   | 0 | 2  | Not-determined | Genome-fragment | NA    | 0     |
| S17-final-viral-combined_k141_260203 | [full]   | 18403 | No  | NA   | 0 | 4  | Not-determined | Genome-fragment | NA    | 0     |
| S17-final-viral-combined_k141_15702  | [full]   | 2112  | No  | NA   | 0 | 2  | Not-determined | Genome-fragment | NA    | 0     |
| S17-final-viral-combined_k141_52941  | [full]   | 1160  | No  | NA   | 0 | 0  | Not-determined | Genome-fragment | NA    | 0     |
| S17-final-viral-combined_k141_160569 | [full]   | 1193  | No  | NA   | 0 | 0  | Not-determined | Genome-fragment | NA    | 0     |
| S17-final-viral-combined_k141_228664 | [full]   | 1682  | No  | NA   | 0 | 1  | Not-determined | Genome-fragment | NA    | 0     |
| S17-final-viral-combined_k141_276321 | [full]   | 1292  | No  | NA   | 0 | 3  | Not-determined | Genome-fragment | NA    | 0     |
| S17-final-viral-combined_k141_217540 | [full]   | 1230  | No  | NA   | 0 | 0  | Not-determined | Genome-fragment | NA    | 0     |
| S5-final-viral-combined_k141_105193  | [full]   | 2228  | No  | NA   | 0 | 0  | Low-quality    | Genome-fragment | 1.33  | 0     |
| S17-final-viral-combined_k141_206253 | [full]   | 1115  | No  | NA   | 0 | 1  | Not-determined | Genome-fragment | NA    | 0     |
| S7-final-viral-combined_k141_132918  | [full]   | 2228  | No  | NA   | 0 | 0  | Low-quality    | Genome-fragment | 2.51  | 0     |
| S17-final-viral-combined_k141_184195 | [full]   | 2664  | No  | NA   | 0 | 0  | Not-determined | Genome-fragment | NA    | 0     |
| S17-final-viral-combined_k141_235880 | [full]   | 4092  | No  | NA   | 0 | 0  | Not-determined | Genome-fragment | NA    | 0     |
| S12-final-viral-combined_k141_164559 | [full]   | 2228  | No  | NA   | 0 | 0  | Low-quality    | Genome-fragment | 3.87  | 0     |
| S2-final-viral-combined_k141_108166  | [full]   | 2228  | No  | NA   | 1 | 0  | Low-quality    | Genome-fragment | 3.45  | 0     |
| S6-final-viral-combined_k141_206151  | [full]   | 2228  | Yes | NA   | 1 | 1  | Low-quality    | Genome-fragment | 1.67  | 26.48 |
| S17-final-viral-combined_k141_53441  | [full]   | 1259  | No  | 1638 | 0 | 0  | Not-determined | Genome-fragment | NA    | 0     |
| S7-final-viral-combined_k141_11235   | [full]   | 2229  | No  | NA   | 1 | 0  | Low-quality    | Genome-fragment | 3.64  | 0     |
| S17-final-viral-combined_k141_172266 | [full]   | 1902  | No  | NA   | 0 | 2  | Not-determined | Genome-fragment | NA    | 0     |
| S7-final-viral-combined_k141_94451   | [full]   | 2229  | No  | NA   | 2 | 0  | Low-quality    | Genome-fragment | 2.71  | 0     |
| S17-final-viral-combined_k141_157611 | [full]   | 1011  | No  | NA   | 0 | 1  | Not-determined | Genome-fragment | NA    | 0     |
| S7-final-viral-combined_k141_235880  | [full]   | 2229  | No  | NA   | 0 | 1  | Low-quality    | Genome-fragment | 12.66 | 0     |
| S17-final-viral-combined_k141_128129 | [full]   | 2017  | No  | NA   | 0 | 2  | Not-determined | Genome-fragment | NA    | 0     |
| S2-final-viral-combined_k141_182420  | [full]   | 2229  | No  | NA   | 0 | 1  | Low-quality    | Genome-fragment | 1.43  | 0     |
| S8_k141_164156                       | [full]   | 2229  | No  | NA   | 0 | 2  | Low-quality    | Genome-fragment | 1.39  | 0     |
| S17-final-viral-combined_k141_238804 | [full]   | 4261  | No  | NA   | 0 | 4  | Not-determined | Genome-fragment | NA    | 0     |
| S11-final-viral-combined_k141_161421 | [full]   | 2230  | No  | NA   | 0 | 1  | Low-quality    | Genome-fragment | 0.57  | 0     |
| S17-final-viral-combined_k141_195105 | [full]   | 1823  | No  | NA   | 0 | 1  | Not-determined | Genome-fragment | NA    | 0     |
| S17-final-viral-combined_k141_48381  | [full]   | 1643  | No  | NA   | 0 | 2  | Not-determined | Genome-fragment | NA    | 0     |
| S1-final-viral-combined_k141_129962  | [full]   | 2230  | No  | NA   | 0 | 0  | Low-quality    | Genome-fragment | 3.4   | 0     |
| S17-final-viral-combined_k141_5425   | [full]   | 8830  | No  | NA   | 0 | 4  | Not-determined | Genome-fragment | NA    | 0     |
| S17-final-viral-combined_k141_105726 | [full]   | 1543  | No  | NA   | 0 | 2  | Not-determined | Genome-fragment | NA    | 0     |
| S2-final-viral-combined_k141_123687  | [full]   | 2230  | No  | NA   | 0 | 1  | Low-quality    | Genome-fragment | 1.74  | 0     |
| S17-final-viral-combined_k141_206231 | [full]   | 1253  | No  | NA   | 0 | 3  | Not-determined | Genome-fragment | NA    | 0     |
| S2-final-viral-combined_k141_246796  | [full]   | 2230  | No  | NA   | 1 | 0  | Low-quality    | Genome-fragment | 6.23  | 0     |
| S17-final-viral-combined_k141_260336 | [full]   | 1596  | No  | NA   | 0 | 0  | Not-determined | Genome-fragment | NA    | 0     |
| S17-final-viral-combined_k141_160697 | [full]   | 3412  | No  | NA   | 0 | 2  | Not-determined | Genome-fragment | NA    | 0     |
| S17-final-viral-combined_k141_195156 | [full]   | 2979  | No  | NA   | 0 | 1  | Not-determined | Genome-fragment | NA    | 0     |
| S4-final-viral-combined_k141_8280    | [full]   | 2230  | No  | NA   | 1 | 0  | Low-quality    | Genome-fragment | 32.86 | 0     |
| S17-final-viral-combined_k141_128232 | [full]   | 11539 | No  | NA   | 0 | 2  | Not-determined | Genome-fragment | NA    | 0     |
| S17-final-viral-combined_k141_72766  | [full]   | 1078  | No  | NA   | 0 | 0  | Not            |                 |       |       |



|                                      |          |       |     |     |   |   |                |                 |    |       |   |
|--------------------------------------|----------|-------|-----|-----|---|---|----------------|-----------------|----|-------|---|
| S17-final-viral-combined_k141_195348 | [full]   | 1482  | No  | NA  | 0 | 0 | Not-determined | Genome-fragment | NA | 0     | 0 |
| S2_k141_192119                       |          | 2215  | No  | NA  | 0 | 1 | Low-quality    | Genome-fragment | NA | 0.59  | 0 |
| S12-final-viral-combined_k141_211331 | [full]   | 2236  | No  | NA  | 1 | 0 | Low-quality    | Genome-fragment | NA | 4.65  | 0 |
| S11-final-viral-combined_k141_161971 | [full]   | 2237  | No  | NA  | 1 | 0 | Low-quality    | Genome-fragment | NA | 1.67  | 0 |
| S11_k141_231168                      |          | 2237  | No  | NA  | 0 | 1 | Low-quality    | Genome-fragment | NA | 2.29  | 0 |
| S5-final-viral-combined_k141_183894  | [full]   | 2237  | No  | NA  | 0 | 1 | Low-quality    | Genome-fragment | NA | 4.86  | 0 |
| S17-final-viral-combined_k141_160895 | [full]   | 4695  | No  | NA  | 0 | 2 | Not-determined | Genome-fragment | NA | 0     | 0 |
| S17-final-viral-combined_k141_239082 | [full]   | 7432  | No  | NA  | 0 | 2 | Not-determined | Genome-fragment | NA | 0     | 0 |
| S12-final-viral-combined_k141_291763 | [full]   | 2237  | No  | NA  | 0 | 1 | Low-quality    | Genome-fragment | NA | 1.58  | 0 |
| S17-final-viral-combined_k141_389303 | [full]   | 1666  | No  | NA  | 0 | 1 | Not-determined | Genome-fragment | NA | 0     | 0 |
| S2-final-viral-combined_k141_101880  | [full]   | 2237  | No  | NA  | 0 | 0 | Low-quality    | Genome-fragment | NA | 6.32  | 0 |
| S17-final-viral-combined_k141_195361 | [full]   | 1302  | No  | NA  | 0 | 2 | Not-determined | Genome-fragment | NA | 0     | 0 |
| S17-final-viral-combined_k141_160915 | [full]   | 1323  | No  | NA  | 0 | 1 | Not-determined | Genome-fragment | NA | 0     | 0 |
| S6-final-viral-combined_k141_745541  | [full]   | 2237  | No  | NA  | 0 | 0 | Low-quality    | Genome-fragment | NA | 4.46  | 0 |
| S17-final-viral-combined_k141_139759 | [full]   | 1559  | No  | NA  | 0 | 0 | Not-determined | Genome-fragment | NA | 0     | 0 |
| S11_k141_95147                       |          | 2238  | No  | NA  | 3 | 0 | Low-quality    | Genome-fragment | NA | 3.03  | 0 |
| S17-final-viral-combined_k141_239103 | [full]   | 1820  | No  | NA  | 0 | 0 | Not-determined | Genome-fragment | NA | 0     | 0 |
| S1-final-viral-combined_k141_318604  | [full]   | 2238  | No  | NA  | 0 | 1 | Low-quality    | Genome-fragment | NA | 4.62  | 0 |
| S7-final-viral-combined_k141_126351  | [full]   | 2238  | No  | NA  | 0 | 1 | Low-quality    | Genome-fragment | NA | 5.65  | 0 |
| S4_k141_147268                       |          | 2238  | No  | NA  | 0 | 0 | Low-quality    | Genome-fragment | NA | 2.3   | 0 |
| S17-final-viral-combined_k141_93597  | [full]   | 4660  | No  | NA  | 0 | 0 | Not-determined | Genome-fragment | NA | 0     | 0 |
| S17-final-viral-combined_k141_293601 | [full]   | 1360  | No  | NA  | 0 | 2 | Not-determined | Genome-fragment | NA | 0     | 0 |
| S17-final-viral-combined_k141_260557 | [full]   | 1225  | No  | NA  | 0 | 1 | Not-determined | Genome-fragment | NA | 0     | 0 |
| S17-final-viral-combined_k141_229111 | [full]   | 1465  | No  | NA  | 0 | 0 | Not-determined | Genome-fragment | NA | 0     | 0 |
| S4-final-viral-combined_k141_79241   | [full]   | 2239  | No  | NA  | 1 | 0 | Low-quality    | Genome-fragment | NA | 5.71  | 0 |
| S17-final-viral-combined_k141_180062 | [full]   | 2239  | No  | NA  | 0 | 1 | Low-quality    | Genome-fragment | NA | 0.97  | 0 |
| S17-final-viral-combined_k141_93625  | [full]   | 1973  | No  | NA  | 0 | 1 | Not-determined | Genome-fragment | NA | 0     | 0 |
| S17-final-viral-combined_k141_27744  | [full]   | 2062  | No  | NA  | 0 | 1 | Not-determined | Genome-fragment | NA | 0     | 0 |
| S17-final-viral-combined_k141_217980 | [full]   | 6156  | No  | NA  | 0 | 2 | Not-determined | Genome-fragment | NA | 0     | 0 |
| S2-final-viral-combined_k141_212204  | [full]   | 2239  | No  | NA  | 1 | 0 | Low-quality    | Genome-fragment | NA | 1.07  | 0 |
| S17-final-viral-combined_k141_260601 | [full]   | 2786  | No  | NA  | 0 | 2 | Not-determined | Genome-fragment | NA | 0     | 0 |
| S2-final-viral-combined_k141_108061  | [H2gene] | 2239  | No  | NA  | 0 | 0 | Low-quality    | Genome-fragment | NA | 0.94  | 0 |
| S17-final-viral-combined_k141_105932 | [full]   | 4597  | No  | NA  | 1 | 4 | Not-determined | Genome-fragment | NA | 0     | 0 |
| S2-final-viral-combined_k141_7236    | [H2gene] | 2239  | No  | NA  | 1 | 0 | Low-quality    | Genome-fragment | NA | 6.87  | 0 |
| S4-final-viral-combined_k141_41225   | [full]   | 2239  | No  | NA  | 0 | 0 | Low-quality    | Genome-fragment | NA | 3.63  | 0 |
| S9_k141_10848                        |          | 2240  | No  | NA  | 0 | 0 | Low-quality    | Genome-fragment | NA | 3.93  | 0 |
| S17-final-viral-combined_k141_249597 | [full]   | 3910  | No  | NA  | 0 | 3 | Not-determined | Genome-fragment | NA | 0     | 0 |
| S17-final-viral-combined_k141_184765 | [full]   | 1953  | No  | NA  | 0 | 3 | Not-determined | Genome-fragment | NA | 0     | 0 |
| S5_k141_39187                        |          | 2240  | No  | NA  | 0 | 2 | Low-quality    | Genome-fragment | NA | 3.71  | 0 |
| S17-final-viral-combined_k141_229203 | [full]   | 2000  | No  | NA  | 0 | 2 | Not-determined | Genome-fragment | NA | 0     | 0 |
| S17-final-viral-combined_k141_84699  | [full]   | 1809  | No  | NA  | 0 | 1 | Not-determined | Genome-fragment | NA | 1.71  | 0 |
| S5-final-viral-combined_k141_38543   | [full]   | 2240  | Yes | 968 | 0 | 1 | Low-quality    | Genome-fragment | NA | 56.79 | 0 |
| S17-final-viral-combined_k141_260652 | [full]   | 7105  | No  | NA  | 0 | 2 | Not-determined | Genome-fragment | NA | 0     | 0 |
| S7-final-viral-combined_k141_52680   | [full]   | 2240  | No  | NA  | 0 | 2 | Low-quality    | Genome-fragment | NA | 1.56  | 0 |
| S12-final-viral-combined_k141_345529 | [full]   | 2240  | No  | NA  | 1 | 0 | Low-quality    | Genome-fragment | NA | 3.53  | 0 |
| S17-final-viral-combined_k141_229230 | [full]   | 1653  | No  | NA  | 0 | 0 | Not-determined | Genome-fragment | NA | 0     | 0 |
| S17-final-viral-combined_k141_128576 | [full]   | 1650  | No  | NA  | 0 | 0 | Not-determined | Genome-fragment | NA | 0     | 0 |
| S4-final-viral-combined_k141_95169   | [full]   | 2241  | No  | NA  | 1 | 0 | Low-quality    | Genome-fragment | NA | 3.59  | 0 |
| S7-final-viral-combined_k141_184985  | [full]   | 2241  | No  | NA  | 0 | 0 | Low-quality    | Genome-fragment | NA | 0     | 0 |
| S17-final-viral-combined_k141_218043 | [full]   | 3058  | No  | NA  | 0 | 2 | Not-determined | Genome-fragment | NA | 5.24  | 0 |
| S17-final-viral-combined_k141_106024 | [full]   | 2328  | No  | NA  | 0 | 1 | Not-determined | Genome-fragment | NA | 0     | 0 |
| S17-final-viral-combined_k141_128580 | [full]   | 1598  | No  | NA  | 0 | 1 | Not-determined | Genome-fragment | NA | 0     | 0 |
| S2-final-viral-combined_k141_61891   | [full]   | 2241  | No  | NA  | 0 | 0 | Low-quality    | Genome-fragment | NA | 5.69  | 0 |
| S4_k141_32550                        |          | 2241  | No  | NA  | 1 | 0 | Low-quality    | Genome-fragment | NA | 2.37  | 0 |
| S17-final-viral-combined_k141_48701  | [full]   | 2170  | No  | NA  | 0 | 1 | Not-determined | Genome-fragment | NA | 0     | 0 |
| S17-final-viral-combined_k141_139859 | [full]   | 3135  | No  | NA  | 0 | 2 | Not-determined | Genome-fragment | NA | 0     | 0 |
| S17-final-viral-combined_k141_128605 | [full]   | 1900  | No  | NA  | 0 | 2 | Not-determined | Genome-fragment | NA | 0     | 0 |
| S1_k141_24153                        |          | 2242  | No  | NA  | 0 | 0 | Low-quality    | Genome-fragment | NA | 2.47  | 0 |
| S7_k141_130941                       |          | 2242  | No  | NA  | 0 | 0 | Low-quality    | Genome-fragment | NA | 0.71  | 0 |
| S17-final-viral-combined_k141_61438  | [full]   | 1545  | No  | NA  | 0 | 1 | Not-determined | Genome-fragment | NA | 0     | 0 |
| S12-final-viral-combined_k141_202043 | [full]   | 2242  | No  | NA  | 0 | 0 | Low-quality    | Genome-fragment | NA | 3.3   | 0 |
| S17-final-viral-combined_k141_249639 | [full]   | 1810  | No  | NA  | 0 | 2 | Not-determined | Genome-fragment | NA | 0     | 0 |
| S17-final-viral-combined_k141_61454  | [full]   | 2951  | No  | NA  | 0 | 4 | Not-determined | Genome-fragment | NA | 0     | 0 |
| S12-final-viral-combined_k141_307978 | [full]   | 2242  | No  | NA  | 0 | 2 | Low-quality    | Genome-fragment | NA | 4.13  | 0 |
| S12_k141_222996                      |          | 2242  | No  | NA  | 0 | 1 | Low-quality    | Genome-fragment | NA | 4.97  | 0 |
| S17-final-viral-combined_k141_139928 | [full]   | 1171  | No  | NA  | 0 | 0 | Not-determined | Genome-fragment | NA | 0     | 0 |
| S8-final-viral-combined_k141_233263  | [H2gene] | 2242  | No  | NA  | 1 | 0 | Low-quality    | Genome-fragment | NA | 1.24  | 0 |
| S7-final-viral-combined_k141_185175  | [full]   | 2243  | No  | NA  | 3 | 0 | Low-quality    | Genome-fragment | NA | 5.87  | 0 |
| S4-final-viral-combined_k141_141271  | [full]   | 2243  | No  | NA  | 0 | 0 | Low-quality    | Genome-fragment | NA | 1.36  | 0 |
| S17-final-viral-combined_k141_73143  | [full]   | 1106  | No  | NA  | 0 | 0 | Not-determined | Genome-fragment | NA | 0     | 0 |
| S17-final-viral-combined_k141_218130 | [full]   | 5732  | No  | NA  | 0 | 3 | Not-determined | Genome-fragment | NA | 0     | 0 |
| S17-final-viral-combined_k141_128681 | [full]   | 3238  | No  | NA  | 0 | 2 | Not-determined | Genome-fragment | NA | 0     | 0 |
| S4-final-viral-combined_k141_1988    | [H2gene] | 2243  | No  | NA  | 1 | 0 | Low-quality    | Genome-fragment | NA | 3.32  | 0 |
| S17-final-viral-combined_k141_260744 | [full]   | 1346  | No  | NA  | 0 | 1 | Not-determined | Genome-fragment | NA | 0     | 0 |
| S17-final-viral-combined_k141_207011 | [full]   | 1601  | No  | NA  | 0 | 2 | Not-determined | Genome-fragment | NA | 0     | 0 |
| S8-final-viral-combined_k141_79181   | [full]   | 2243  | No  | NA  | 1 | 0 | Low-quality    | Genome-fragment | NA | 3.88  | 0 |
| S9-final-viral-combined_k141_55863   | [full]   | 2244  | No  | NA  | 0 | 2 | Low-quality    | Genome-fragment | NA | 1.49  | 0 |
| S17-final-viral-combined_k141_260775 | [full]   | 2056  | No  | NA  | 0 | 2 | Not-determined | Genome-fragment | NA | 0     | 0 |
| S8-final-viral-combined_k141_171611  | [full]   | 2244  | No  | NA  | 0 | 1 | Low-quality    | Genome-fragment | NA | 5.46  | 0 |
| S17-final-viral-combined_k141_84847  | [full]   | 9354  | No  | NA  | 0 | 6 | Not-determined | Genome-fragment | NA | 0     | 0 |
| S17-final-viral-combined_k141_61495  | [full]   | 2248  | No  | NA  | 0 | 1 | Not-determined | Genome-fragment | NA | 0     | 0 |
| S11-final-viral-combined_k141_29067  | [full]   | 2244  | No  | NA  | 0 | 1 | Low-quality    | Genome-fragment | NA | 2.88  | 0 |
| S11_k141_146494                      |          | 2244  | No  | NA  | 1 | 0 | Low-quality    | Genome-fragment | NA | 1.78  | 0 |
| S11_k141_146538                      |          | 2244  | No  | NA  | 1 | 0 | Low-quality    | Genome-fragment | NA | 1.78  | 0 |
| S17-final-viral-combined_k141_118744 | [full]   | 4196  | No  | NA  | 0 | 2 | Not-determined | Genome-fragment | NA | 0     | 0 |
| S17-final-viral-combined_k141_16143  | [full]   | 1336  | No  | NA  | 0 | 0 | Not-determined | Genome-fragment | NA | 0     | 0 |
| S17-final-viral-combined_k141_118747 | [full]   | 2079  | No  | NA  | 0 | 0 | Not-determined | Genome-fragment | NA | 0     | 0 |
| S11_k141_174722                      |          | 2244  | No  | NA  | 0 | 1 | Low-quality    | Genome-fragment | NA | 1.31  | 0 |
| S17-final-viral-combined_k141_139990 | [full]   | 2717  | No  | NA  | 0 | 0 | Not-determined | Genome-fragment | NA | 0     | 0 |
| S7-final-viral-combined_k141_153577  | [full]   | 2244  | No  | NA  | 0 | 0 | Low-quality    | Genome-fragment | NA | 2.74  | 0 |
| S17-final-viral-combined_k141_207058 | [full]   | 6206  | No  | NA  | 0 | 2 | Not-determined | Genome-fragment | NA | 0     | 0 |
| S17-final-viral-combined_k141_260821 | [full]   | 2669  | No  | NA  | 0 | 2 | Not-determined | Genome-fragment | NA | 0     | 0 |
| S17-final-viral-combined_k141_106217 | [full]   | 6206  | No  | NA  | 0 | 3 | Not-determined | Genome-fragment | NA | 0     | 0 |
| S17-final-viral-combined_k141_229399 | [full]   | 1941  | No  | NA  | 0 | 0 | Not-determined | Genome-fragment | NA | 0     | 0 |
| S12-final-viral-combined_k141_189641 | [full]   | 2244  | No  | NA  | 0 | 0 | Low-quality    | Genome-fragment | NA | 5.86  | 0 |
| S12-final-viral-combined_k141_293924 | [full]   | 2244  | No  | NA  | 0 | 1 | Low-quality    | Genome-fragment | NA | 1.41  | 0 |
| S17-final-viral-combined_k141_106138 | [full]   | 1760  | No  | NA  | 0 | 0 | Not-determined | Genome-fragment | NA | 0     | 0 |
| S4-final-viral-combined_k141_47273   | [full]   | 2245  | No  | NA  | 0 | 0 | Low-quality    | Genome-fragment | NA | 4.77  | 0 |
| S17-final-viral-combined_k141_84903  | [full]   | 13748 | No  | NA  | 0 | 2 | Not-determined | Genome-fragment | NA | 0     | 0 |
| S7-final-viral-combined_k141_8463    | [full]   | 2246  | No  | NA  | 1 | 0 | Low-quality    | Genome-fragment | NA | 1.51  | 0 |
| S17-final-viral-combined_k141_239357 | [full]   | 5455  | No  | NA  | 0 | 1 | Not-determined | Genome-fragment | NA | 0     | 0 |
| S17-final-viral-combined_k141_213266 | [full]   | 5751  | No  | NA  | 0 | 1 | Not-determined | Genome-fragment | NA | 0     | 0 |
| S17-final-viral-combined_k141_207101 | [full]   | 3323  | No  | NA  | 0 | 3 | Not-determined | Genome-fragment | NA | 0     | 0 |
| S17-final-viral-combined_k141_260864 | [full]   | 3076  | No  | NA  | 0 | 0 | Not-determined | Genome-fragment | NA | 0     | 0 |
| S17-final-viral-combined_k141_24364  | [full]   | 2246  | No  | NA  | 0 | 0 | Low-quality    | Genome-fragment | NA | 1.33  | 0 |
| S17-final-viral-combined_k141_106175 | [full]   | 4243  | No  | NA  | 0 | 1 | Not-determined | Genome-fragment | NA | 0     | 0 |
| S17-final-viral-combined_k141_207116 | [full]   | 1122  | No  | NA  | 0 | 0 | Not-determined | Genome-fragment | NA | 0     | 0 |
| S12-final-viral-combined_k141_215355 | [full]   | 2246  | No  | NA  | 0 | 1 | Low-quality    | Genome-fragment | NA | 0.74  | 0 |
| S8-final-viral-combined_k141_15822   | [full]   | 2246  | No  | NA  | 0 | 0 | Low-quality    | Genome-fragment | NA | 1.06  | 0 |
| S17-final-viral-combined_k141_179061 | [full]   | 2460  | No  | NA  | 0 | 2 | Not-determined | Genome-fragment | NA | 0     | 0 |
| S17-final-viral-combined_k141_16167  | [full]   | 2891  | No  | NA  | 0 | 3 | Not-determined | Genome-fragment | NA | 0     | 0 |
| S12-final-viral-combined_k141_48073  | [full]   | 2247  | No  | NA  | 1 | 0 | Low-quality    | Genome-fragment | NA | 5.03  | 0 |
| S2-final-viral-combined_k141_7403    | [full]   | 2247  | No  | NA  | 1 | 0 | Low-quality    | Genome-fragment | NA | 3.09  | 0 |
| S17-final-viral-combined_k141_175921 | [full]   | 2038  | No  | NA  | 0 | 1 | Not-determined | Genome-fragment | NA | 0     | 0 |
| S11-final-viral-combined_k141_28430  | [full]   | 2248  | No  | NA  | 0 | 0 | Low-quality    | Genome-fragment | NA | 5.76  | 0 |
| S17-final-viral-combined_k141_16188  | [full]   | 1687  | No  | NA  | 0 | 1 | Not-determined | Genome-fragment | NA | 0     | 0 |
| S1-final-viral-combined_k141_26337   | [full]   | 2248  | No  | NA  | 0 | 4 | Low-quality    | Genome-fragment | NA | 1.39  | 0 |
| S17-final-viral-combined_k141_228428 | [full]   | 1407  | No  | NA  | 0 | 1 | Not-determined | Genome-fragment | NA | 0     | 0 |
| S17-final-viral-combined_k141_5889   | [full]   | 1248  | No  | NA  | 0 | 0 | Not-determined | Genome-fragment | NA | 0     | 0 |
| S1-final-viral-combined_k141_35017   | [full]   | 2248  | No  | NA  | 0 | 0 | Low-quality    | Genome-fragment | NA | 2.69  | 0 |
| S17-final-viral-combined_k141_239432 | [full]   | 2419  | No  | NA  | 0 | 3 | Not-determined | Genome-fragment | NA | 0     | 0 |
| S17-final-viral-combined_k141_39141  | [full]   | 1163  | No  | NA  | 0 | 1 | Not-determined |                 |    |       |   |



|                                       |        |       |     |      |    |    |                |                 |    |       |       |
|---------------------------------------|--------|-------|-----|------|----|----|----------------|-----------------|----|-------|-------|
| S17-final-viral-combined_k141_1189841 | [full] | 1437  | No  | NA   | 0  | 0  | Not-determined | Genome-fragment | NA | 0     | 0     |
| S17-final-viral-combined_k141_18151   | [full] | 1893  | No  | NA   | 0  | 1  | Not-determined | Genome-fragment | NA | 0     | 0     |
| S11-final-viral-combined_k141_107810  | [full] | 2253  | No  | NA   | 0  | 0  | Low-quality    | Genome-fragment | NA | 4.11  | 0     |
| S1-final-viral-combined_k141_249960   | [full] | 2253  | No  | NA   | 0  | 0  | Low-quality    | Genome-fragment | NA | 14.57 | 0     |
| S1_k141_215238                        |        | 2253  | No  | NA   | 0  | 0  | Low-quality    | Genome-fragment | NA | 1.38  | 0     |
| S5-final-viral-combined_k141_178769   | [full] | 2253  | No  | NA   | 1  | 0  | Low-quality    | Genome-fragment | NA | 4.83  | 0     |
| S12-final-viral-combined_k141_35488   | [full] | 2253  | No  | NA   | 1  | 0  | Low-quality    | Genome-fragment | NA | 3.73  | 0     |
| S17-final-viral-combined_k141_218568  | [full] | 1194  | No  | NA   | 0  | 2  | Not-determined | Genome-fragment | NA | 0     | 0     |
| S17-final-viral-combined_k141_106311  | [full] | 6700  | No  | NA   | 0  | 2  | Not-determined | Genome-fragment | NA | 0     | 0     |
| S17-final-viral-combined_k141_28138   | [full] | 1465  | No  | NA   | 0  | 0  | Not-determined | Genome-fragment | NA | 0     | 0     |
| S17-final-viral-combined_k141_61852   | [full] | 1336  | No  | NA   | 0  | 0  | Not-determined | Genome-fragment | NA | 0     | 0     |
| S17-final-viral-combined_k141_16132   | [full] | 2617  | No  | NA   | 0  | 2  | Not-determined | Genome-fragment | NA | 0     | 0     |
| S17-final-viral-combined_k141_28140   | [full] | 2917  | No  | NA   | 0  | 2  | Not-determined | Genome-fragment | NA | 0     | 0     |
| S4-final-viral-combined_k141_128360   | [full] | 2253  | No  | NA   | 1  | 0  | Low-quality    | Genome-fragment | NA | 3.79  | 0     |
| S17-final-viral-combined_k141_261383  | [full] | 1838  | No  | NA   | 0  | 1  | Not-determined | Genome-fragment | NA | 0     | 0     |
| S17-final-viral-combined_k141_161302  | [full] | 1915  | No  | NA   | 0  | 0  | Not-determined | Genome-fragment | NA | 0     | 0     |
| S17-final-viral-combined_k141_207410  | [full] | 6710  | No  | NA   | 0  | 5  | Not-determined | Genome-fragment | NA | 0     | 0     |
| S9-final-viral-combined_k141_65921    | [full] | 2254  | No  | NA   | 1  | 0  | Low-quality    | Genome-fragment | NA | 5.21  | 0     |
| S17-final-viral-combined_k141_196088  | [full] | 2686  | No  | NA   | 0  | 1  | Not-determined | Genome-fragment | NA | 0     | 0     |
| S17-final-viral-combined_k141_249936  | [full] | 1169  | No  | NA   | 0  | 1  | Not-determined | Genome-fragment | NA | 0     | 0     |
| S17-final-viral-combined_k141_228686  | [full] | 1324  | No  | NA   | 0  | 1  | Not-determined | Genome-fragment | NA | 0     | 0     |
| S17-final-viral-combined_k141_29510   | [full] | 1837  | No  | NA   | 0  | 0  | Not-determined | Genome-fragment | NA | 0     | 0     |
| S9-final-viral-combined_k141_113809   | [full] | 2254  | No  | NA   | 1  | 0  | Low-quality    | Genome-fragment | NA | 17.63 | 0     |
| S17-final-viral-combined_k141_61930   | [full] | 1202  | No  | NA   | 0  | 0  | Not-determined | Genome-fragment | NA | 0     | 0     |
| S1_k141_344587                        |        | 2254  | No  | NA   | 1  | 0  | Low-quality    | Genome-fragment | NA | 22.64 | 0     |
| S17-final-viral-combined_k141_172848  | [full] | 2254  | No  | NA   | 0  | 0  | Low-quality    | Genome-fragment | NA | 3.68  | 0     |
| S6-final-viral-combined_k141_36441    | [full] | 2254  | No  | NA   | 0  | 0  | Low-quality    | Genome-fragment | NA | 0.9   | 0     |
| S17-final-viral-combined_k141_6129    | [full] | 6056  | No  | NA   | 0  | 1  | Not-determined | Genome-fragment | NA | 0     | 0     |
| S1-final-viral-combined_k141_163515   | [full] | 2255  | No  | NA   | 0  | 0  | Low-quality    | Genome-fragment | NA | 4.08  | 0     |
| S1-final-viral-combined_k141_392709   | [full] | 2255  | No  | NA   | 2  | 0  | Low-quality    | Genome-fragment | NA | 5.68  | 0     |
| S7-final-viral-combined_k141_199681   | [full] | 2255  | No  | NA   | 0  | 3  | Low-quality    | Genome-fragment | NA | 1.93  | 0     |
| S12-final-viral-combined_k141_257861  | [full] | 2255  | No  | NA   | 1  | 2  | Low-quality    | Genome-fragment | NA | 2.67  | 0     |
| S8-final-viral-combined_k141_83169    | [full] | 2255  | No  | NA   | 1  | 0  | Low-quality    | Genome-fragment | NA | 4.13  | 0     |
| S9-final-viral-combined_k141_92736    | [full] | 2256  | No  | NA   | 3  | 0  | Low-quality    | Genome-fragment | NA | 4.92  | 0     |
| S17-final-viral-combined_k141_229733  | [full] | 1824  | No  | NA   | 0  | 2  | Not-determined | Genome-fragment | NA | 0     | 0     |
| S9_k141_58468                         |        | 2256  | No  | NA   | 0  | 0  | Low-quality    | Genome-fragment | NA | 3.77  | 0     |
| S17-final-viral-combined_k141_218693  | [full] | 3117  | No  | NA   | 0  | 0  | Not-determined | Genome-fragment | NA | 0     | 0     |
| S11-final-viral-combined_k141_280527  | [full] | 2256  | No  | NA   | 0  | 0  | Low-quality    | Genome-fragment | NA | 3.05  | 0     |
| S7-final-viral-combined_k141_637515   | [full] | 2256  | No  | NA   | 0  | 0  | Low-quality    | Genome-fragment | NA | 1.29  | 0     |
| S17-final-viral-combined_k141_173249  | [full] | 15458 | No  | NA   | 0  | 6  | Not-determined | Genome-fragment | NA | 0     | 0     |
| S17-final-viral-combined_k141_61994   | [full] | 1462  | No  | NA   | 0  | 2  | Not-determined | Genome-fragment | NA | 0     | 0     |
| S17-final-viral-combined_k141_119081  | [full] | 2800  | No  | NA   | 0  | 2  | Not-determined | Genome-fragment | NA | 0     | 0     |
| S17-final-viral-combined_k141_84324   | [full] | 2256  | No  | NA   | 0  | 1  | Low-quality    | Genome-fragment | NA | 0.91  | 0     |
| S17-k141_176866                       |        | 2256  | No  | NA   | 2  | 0  | Low-quality    | Genome-fragment | NA | 5.27  | 0     |
| S6-final-viral-combined_k141_23639    | [full] | 2256  | No  | NA   | 0  | 0  | Low-quality    | Genome-fragment | NA | 2.83  | 0     |
| S17-final-viral-combined_k141_239690  | [full] | 2284  | No  | NA   | 0  | 1  | Not-determined | Genome-fragment | NA | 0     | 0     |
| S6_k141_33554                         |        | 2256  | No  | NA   | 0  | 2  | Low-quality    | Genome-fragment | NA | 3.55  | 0     |
| S17-final-viral-combined_k141_25004   | [full] | 3170  | No  | NA   | 0  | 2  | Not-determined | Genome-fragment | NA | 0     | 0     |
| S17-final-viral-combined_k141_16537   | [full] | 21629 | No  | NA   | 0  | 0  | Not-determined | Genome-fragment | NA | 0     | 0     |
| S17-final-viral-combined_k141_106438  | [full] | 1600  | No  | NA   | 0  | 1  | Not-determined | Genome-fragment | NA | 0     | 0     |
| S17-final-viral-combined_k141_94015   | [full] | 1513  | No  | NA   | 0  | 0  | Not-determined | Genome-fragment | NA | 0     | 0     |
| S2-final-viral-combined_k141_129121   | [full] | 2257  | No  | NA   | 0  | 0  | Low-quality    | Genome-fragment | NA | 4.09  | 0     |
| S7-final-viral-combined_k141_960      | [full] | 2257  | No  | NA   | 0  | 0  | Low-quality    | Genome-fragment | NA | 2.81  | 0     |
| S17-final-viral-combined_k141_49191   | [full] | 1782  | No  | NA   | 0  | 1  | Not-determined | Genome-fragment | NA | 0     | 0     |
| S17-final-viral-combined_k141_173283  | [full] | 11557 | No  | NA   | 0  | 0  | Not-determined | Genome-fragment | NA | 0     | 0     |
| S7-final-viral-combined_k141_83284    | [full] | 2257  | No  | NA   | 0  | 0  | Low-quality    | Genome-fragment | NA | 5.18  | 0     |
| S17-k141_66048                        |        | 2257  | No  | NA   | 0  | 1  | Low-quality    | Genome-fragment | NA | 0.19  | 0     |
| S17-final-viral-combined_k141_100459  | [full] | 2843  | No  | NA   | 0  | 2  | Not-determined | Genome-fragment | NA | 1.55  | 0     |
| S2-final-viral-combined_k141_24451    | [full] | 2257  | No  | NA   | 0  | 1  | Low-quality    | Genome-fragment | NA | 1.55  | 0     |
| S17-final-viral-combined_k141_239717  | [full] | 1783  | No  | NA   | 0  | 3  | Not-determined | Genome-fragment | NA | 0     | 0     |
| S17-final-viral-combined_k141_185239  | [full] | 11758 | No  | NA   | 1  | 21 | Medium-quality | Genome-fragment | NA | 65.4  | 0     |
| S17-final-viral-combined_k141_128068  | [full] | 1776  | No  | NA   | 0  | 1  | Not-determined | Genome-fragment | NA | 0     | 0     |
| S17-final-viral-combined_k141_62067   | [full] | 1104  | No  | NA   | 0  | 2  | Not-determined | Genome-fragment | NA | 0     | 0     |
| S17-final-viral-combined_k141_151156  | [full] | 1473  | No  | NA   | 0  | 2  | Not-determined | Genome-fragment | NA | 0     | 0     |
| S2-final-viral-combined_k141_128175   | [full] | 2257  | No  | NA   | 0  | 1  | Low-quality    | Genome-fragment | NA | 2.5   | 0     |
| S17-final-viral-combined_k141_39638   | [full] | 2234  | No  | NA   | 0  | 3  | Not-determined | Genome-fragment | NA | 0     | 0     |
| S17-final-viral-combined_k141_94064   | [full] | 12139 | No  | NA   | 0  | 6  | Not-determined | Genome-fragment | NA | 0     | 0     |
| S2-final-viral-combined_k141_112986   | [full] | 2257  | No  | NA   | 0  | 0  | Low-quality    | Genome-fragment | NA | 6.18  | 0     |
| S17-final-viral-combined_k141_151179  | [full] | 1411  | No  | NA   | 0  | 0  | Not-determined | Genome-fragment | NA | 0     | 0     |
| S11-final-viral-combined_k141_181405  | [full] | 2258  | No  | NA   | 1  | 0  | Low-quality    | Genome-fragment | NA | 5     | 0     |
| S17-final-viral-combined_k141_85265   | [full] | 2505  | No  | NA   | 0  | 1  | Not-determined | Genome-fragment | NA | 5     | 0     |
| S17-final-viral-combined_k141_28334   | [full] | 4284  | No  | NA   | 0  | 2  | Not-determined | Genome-fragment | NA | 0     | 0     |
| S17-k141_197730                       |        | 2258  | No  | NA   | 0  | 1  | Low-quality    | Genome-fragment | NA | 2.62  | 0     |
| S6-final-viral-combined_k141_3674     | [full] | 2258  | No  | NA   | 0  | 1  | Low-quality    | Genome-fragment | NA | 0.89  | 0     |
| S1_k141_55772                         |        | 2259  | No  | NA   | 0  | 0  | Low-quality    | Genome-fragment | NA | 3.99  | 0     |
| S17-final-viral-combined_k141_62122   | [full] | 2022  | No  | NA   | 0  | 1  | Not-determined | Genome-fragment | NA | 0     | 0     |
| S17-final-viral-combined_k141_229843  | [full] | 2245  | No  | NA   | 0  | 4  | Not-determined | Genome-fragment | NA | 0     | 0     |
| S5-final-viral-combined_k141_94374    | [full] | 2259  | No  | NA   | 0  | 0  | Low-quality    | Genome-fragment | NA | 4.58  | 0     |
| S17-final-viral-combined_k141_261382  | [full] | 3844  | No  | NA   | 0  | 2  | Not-determined | Genome-fragment | NA | 0     | 0     |
| S17-final-viral-combined_k141_261386  | [full] | 2478  | No  | NA   | 0  | 1  | Not-determined | Genome-fragment | NA | 0     | 0     |
| S7-final-viral-combined_k141_119007   | [full] | 2259  | No  | NA   | 0  | 3  | Low-quality    | Genome-fragment | NA | 1.31  | 0     |
| S17-final-viral-combined_k141_39687   | [full] | 24027 | No  | NA   | 13 | 0  | Medium-quality | Genome-fragment | NA | 70.37 | 0     |
| S17-final-viral-combined_k141_151254  | [full] | 2026  | No  | NA   | 0  | 0  | Not-determined | Genome-fragment | NA | 0     | 0     |
| S17-final-viral-combined_k141_6276    | [full] | 10942 | No  | NA   | 0  | 6  | Not-determined | Genome-fragment | NA | 0     | 0     |
| S2-final-viral-combined_k141_207286   | [full] | 2259  | No  | NA   | 0  | 0  | Low-quality    | Genome-fragment | NA | 5.7   | 0     |
| S2-final-viral-combined_k141_66044    | [full] | 2259  | No  | NA   | 0  | 0  | Low-quality    | Genome-fragment | NA | 4.75  | 0     |
| S8_k141_232652                        |        | 2259  | No  | NA   | 1  | 0  | Low-quality    | Genome-fragment | NA | 3.91  | 0     |
| S11-final-viral-combined_k141_182339  | [full] | 2260  | No  | NA   | 0  | 1  | Low-quality    | Genome-fragment | NA | 2.43  | 0     |
| S11-final-viral-combined_k141_257961  | [full] | 2260  | Yes | 1768 | 0  | 1  | Low-quality    | Genome-fragment | NA | 1.04  | 21.77 |
| S17-final-viral-combined_k141_106605  | [full] | 2040  | No  | NA   | 0  | 1  | Not-determined | Genome-fragment | NA | 0     | 0     |
| S11-final-viral-combined_k141_39768   | [full] | 2260  | No  | NA   | 0  | 3  | Low-quality    | Genome-fragment | NA | 2.71  | 0     |
| S17-final-viral-combined_k141_49271   | [full] | 2804  | No  | NA   | 0  | 1  | Not-determined | Genome-fragment | NA | 0     | 0     |
| S17-final-viral-combined_k141_62199   | [full] | 1510  | No  | NA   | 0  | 2  | Not-determined | Genome-fragment | NA | 0     | 0     |
| S17-final-viral-combined_k141_129129  | [full] | 2171  | No  | NA   | 0  | 2  | Not-determined | Genome-fragment | NA | 0     | 0     |
| S3-final-viral-combined_k141_30840    | [full] | 2260  | No  | NA   | 0  | 1  | Low-quality    | Genome-fragment | NA | 1.52  | 0     |
| S17-final-viral-combined_k141_62216   | [full] | 1491  | No  | NA   | 0  | 1  | Not-determined | Genome-fragment | NA | 0     | 0     |
| S17-final-viral-combined_k141_218900  | [full] | 3871  | No  | NA   | 0  | 2  | Not-determined | Genome-fragment | NA | 0     | 0     |
| S17-final-viral-combined_k141_185427  | [full] | 1660  | No  | NA   | 0  | 1  | Not-determined | Genome-fragment | NA | 0     | 0     |
| S6-final-viral-combined_k141_32553    | [full] | 2260  | No  | NA   | 0  | 0  | Low-quality    | Genome-fragment | NA | 4.6   | 0     |
| S17-final-viral-combined_k141_49295   | [full] | 4889  | No  | NA   | 0  | 2  | Not-determined | Genome-fragment | NA | 0     | 0     |
| S8-final-viral-combined_k141_140049   | [full] | 2260  | No  | NA   | 0  | 1  | Low-quality    | Genome-fragment | NA | 4.23  | 0     |
| S17-final-viral-combined_k141_85450   | [full] | 1075  | No  | NA   | 0  | 0  | Not-determined | Genome-fragment | NA | 0     | 0     |
| S5-final-viral-combined_k141_102782   | [full] | 2261  | Yes | 1322 | 1  | 1  | Low-quality    | Genome-fragment | NA | 2.3   | 41.53 |
| S2_k141_115974                        |        | 2261  | No  | NA   | 0  | 0  | Low-quality    | Genome-fragment | NA | 4.77  | 0     |
| S11-final-viral-combined_k141_223851  | [full] | 2262  | No  | NA   | 0  | 1  | Low-quality    | Genome-fragment | NA | 4.3   | 0     |
| S17-final-viral-combined_k141_94158   | [full] | 5005  | No  | NA   | 0  | 1  | Not-determined | Genome-fragment | NA | 0     | 0     |
| S17-final-viral-combined_k141_106649  | [full] | 1374  | No  | NA   | 0  | 3  | Not-determined | Genome-fragment | NA | 0     | 0     |
| S17-final-viral-combined_k141_173487  | [full] | 1999  | No  | NA   | 0  | 1  | Not-determined | Genome-fragment | NA | 0     | 0     |
| S17-final-viral-combined_k141_49117   | [full] | 2760  | No  | NA   | 0  | 0  | Not-determined | Genome-fragment | NA | 0     | 0     |
| S17-final-viral-combined_k141_239961  | [full] | 3702  | No  | NA   | 0  | 1  | Not-determined | Genome-fragment | NA | 0     | 0     |
| S17-final-viral-combined_k141_140454  | [full] | 2005  | No  | NA   | 0  | 1  | Not-determined | Genome-fragment | NA | 0     | 0     |
| S1-final-viral-combined_k141_394529   | [full] | 2262  | No  | NA   | 0  | 1  | Low-quality    | Genome-fragment | NA | 41.86 | 0     |
| S5-final-viral-combined_k141_186998   | [full] | 2262  | No  | NA   | 0  | 2  | Low-quality    | Genome-fragment | NA | 1.62  | 0     |
| S17-final-viral-combined_k141_180660  | [full] | 2262  | No  | NA   | 0  | 0  | Low-quality    | Genome-fragment | NA | 3.8   | 0     |
| S4-final-viral-combined_k141_66608    | [full] | 2262  | No  | NA   | 0  | 1  | Low-quality    | Genome-fragment | NA | 1.55  | 0     |
| S11-final-viral-combined_k141_320393  | [full] | 2263  | No  | NA   | 1  | 0  | Low-quality    | Genome-fragment | NA | 5.18  | 0     |
| S17-final-viral-combined_k141_73904   | [full] | 3792  | No  | NA   | 0  | 3  | Not-determined | Genome-fragment | NA | 0     | 0     |
| S17-final-viral-combined_k141_261494  | [full] | 3115  | No  | NA   | 0  | 2  | Not-determined | Genome-fragment | NA | 0     | 0     |
| S1-final-viral-combined_k141_15277    | [full] | 2263  | No  | NA   | 2  | 0  | Low-quality    | Genome-fragment | NA | 4.87  | 0     |
| S1_k141_140950                        |        | 2263  | No  | NA   | 0  | 2  | Low-quality    | Genome-fragment | NA | 1.64  | 0     |
| S17-final-viral-combined_k141_218887  | [full] | 2019  | No  | NA   | 0  | 2  | Not-determined | Genome-fragment | NA | 0     | 0     |
| S17-final-viral-combined_k141_218900  | [full] | 1426  | No  | NA   | 0  |    |                |                 |    |       |       |



|                                               |       |     |       |    |   |                |                 |    |       |       |
|-----------------------------------------------|-------|-----|-------|----|---|----------------|-----------------|----|-------|-------|
| S17-final-viral-combined_k141_250403]] [full  | 1533  | No  | NA    | 0  | 2 | Not-determined | Genome-fragment | NA | 0     | 0     |
| S17-final-viral-combined_k141_11551]] [full   | 2077  | No  | NA    | 0  | 1 | Not-determined | Genome-fragment | NA | 0     | 0     |
| S17-final-viral-combined_k141_6542]] [full    | 2171  | No  | NA    | 0  | 2 | Not-determined | Genome-fragment | NA | 0     | 0     |
| S11-final-viral-combined_k141_224185]] [full  | 2268  | No  | NA    | 0  | 0 | Low-quality    | Genome-fragment | NA | 3.81  | 0     |
| S14-final-viral-combined_k141_133958]] [full  | 2268  | No  | NA    | 0  | 0 | Low-quality    | Genome-fragment | NA | 5.95  | 0     |
| S17-final-viral-combined_k141_8573]] [full    | 1179  | No  | NA    | 0  | 1 | Not-determined | Genome-fragment | NA | 0     | 0     |
| S17-final-viral-combined_k141_6547]] [full    | 1006  | No  | NA    | 0  | 1 | Not-determined | Genome-fragment | NA | 0     | 0     |
| S17-final-viral-combined_k141_74067]] [full   | 3504  | No  | NA    | 0  | 2 | Not-determined | Genome-fragment | NA | 0     | 0     |
| S1-final-viral-combined_k141_216075]] [full   | 2268  | No  | NA    | 0  | 0 | Low-quality    | Genome-fragment | NA | 4     | 0     |
| S1-final-viral-combined_k141_332661]] [full   | 2268  | No  | NA    | 0  | 3 | Low-quality    | Genome-fragment | NA | 1.17  | 0     |
| S3-final-viral-combined_k141_65354]] [full    | 2268  | No  | NA    | 0  | 0 | Low-quality    | Genome-fragment | NA | 1.04  | 0     |
| S17-final-viral-combined_k141_173790]] [full  | 1340  | No  | NA    | 0  | 0 | Not-determined | Genome-fragment | NA | 1.3   | 0     |
| S8-final-viral-combined_k141_214917]] [full   | 2268  | No  | NA    | 0  | 4 | Low-quality    | Genome-fragment | NA | 1.3   | 0     |
| S17-final-viral-combined_k141_261758]] [full  | 1700  | No  | NA    | 0  | 1 | Not-determined | Genome-fragment | NA | 0     | 0     |
| S9-final-viral-combined_k141_21548]] [full    | 2269  | No  | NA    | 1  | 0 | Low-quality    | Genome-fragment | NA | 1.55  | 0     |
| S17-final-viral-combined_k141_62539]] [full   | 1817  | No  | NA    | 0  | 2 | Not-determined | Genome-fragment | NA | 0     | 0     |
| S17-final-viral-combined_k141_85759]] [full   | 1311  | No  | NA    | 0  | 0 | Not-determined | Genome-fragment | NA | 0     | 0     |
| S17-final-viral-combined_k141_6584]] [full    | 2591  | No  | NA    | 0  | 1 | Not-determined | Genome-fragment | NA | 0     | 0     |
| S17-final-viral-combined_k141_125553]] [full  | 2782  | No  | NA    | 0  | 1 | Not-determined | Genome-fragment | NA | 0     | 0     |
| S7-final-viral-combined_k141_80111]] [full    | 2269  | No  | NA    | 1  | 0 | Low-quality    | Genome-fragment | NA | 2.81  | 0     |
| S17-final-viral-combined_k141_16904]] [full   | 1047  | No  | NA    | 0  | 2 | Not-determined | Genome-fragment | NA | 1.99  | 0     |
| S6-final-viral-combined_k141_5029]] [full     | 2269  | No  | NA    | 0  | 1 | Low-quality    | Genome-fragment | NA | 0     | 0     |
| S17-final-viral-combined_k141_49585]] [full   | 1639  | No  | NA    | 0  | 0 | Not-determined | Genome-fragment | NA | 0     | 0     |
| S11-final-viral-combined_k141_209868]] [full  | 2270  | No  | NA    | 0  | 2 | Low-quality    | Genome-fragment | NA | 1.61  | 0     |
| S17-final-viral-combined_k141_261845]] [full  | 1670  | No  | NA    | 0  | 1 | Not-determined | Genome-fragment | NA | 6.36  | 0     |
| S1-final-viral-combined_k141_53870]] [full    | 2270  | No  | NA    | 0  | 0 | Low-quality    | Genome-fragment | NA | 6.71  | 0     |
| S1_k141_161705                                | 2270  | No  | NA    | 1  | 0 | Low-quality    | Genome-fragment | NA | 6.21  | 0     |
| S5-final-viral-combined_k141_197230]] [full   | 2270  | No  | NA    | 1  | 0 | Low-quality    | Genome-fragment | NA | 0     | 0     |
| S17-final-viral-combined_k141_161898]] [full  | 1567  | No  | NA    | 0  | 0 | Not-determined | Genome-fragment | NA | 0     | 0     |
| S8-final-viral-combined_k141_257262]] [full   | 2270  | No  | NA    | 0  | 0 | Low-quality    | Genome-fragment | NA | 14.7  | 0     |
| S17-final-viral-combined_k141_219253]] [full  | 2676  | No  | NA    | 0  | 1 | Not-determined | Genome-fragment | NA | 0     | 0     |
| S17-final-viral-combined_k141_25058]] [full   | 2058  | No  | NA    | 0  | 1 | Not-determined | Genome-fragment | NA | 0     | 0     |
| S11-final-viral-combined_k141_318656]] [full  | 2271  | No  | NA    | 0  | 0 | Low-quality    | Genome-fragment | NA | 2.31  | 0     |
| S17-final-viral-combined_k141_261902]] [full  | 1421  | No  | NA    | 0  | 0 | Not-determined | Genome-fragment | NA | 0     | 0     |
| S17-final-viral-combined_k141_230361]] [full  | 4667  | No  | NA    | 0  | 3 | Not-determined | Genome-fragment | NA | 0     | 0     |
| S6-final-viral-combined_k141_100840]] [full   | 6260  | Yes | 48510 | 10 | 0 | Medium-quality | Genome-fragment | NA | 77.06 | 22.61 |
| S17-final-viral-combined_k141_94511]] [full   | 2556  | No  | NA    | 0  | 0 | Not-determined | Genome-fragment | NA | 0     | 0     |
| S17-final-viral-combined_k141_261923]] [full  | 3104  | No  | NA    | 0  | 3 | Not-determined | Genome-fragment | NA | 0     | 0     |
| S17-final-viral-combined_k141_161941]] [full  | 1612  | No  | NA    | 0  | 2 | Not-determined | Genome-fragment | NA | 0     | 0     |
| S17-final-viral-combined_k141_49661]] [full   | 2347  | No  | NA    | 0  | 0 | Not-determined | Genome-fragment | NA | 0     | 0     |
| S17-final-viral-combined_k141_85869]] [full   | 2968  | No  | NA    | 0  | 2 | Not-determined | Genome-fragment | NA | 0     | 0     |
| S11-final-viral-combined_k141_21482]] [full   | 2271  | No  | NA    | 0  | 1 | Low-quality    | Genome-fragment | NA | 1.5   | 0     |
| S17-final-viral-combined_k141_129649]] [full  | 2301  | No  | NA    | 0  | 0 | Not-determined | Genome-fragment | NA | 0     | 0     |
| S11-final-viral-combined_k141_74837]] [full   | 2271  | No  | NA    | 1  | 0 | Low-quality    | Genome-fragment | NA | 5.94  | 0     |
| S17-final-viral-combined_k141_173978]] [full  | 2958  | No  | NA    | 0  | 2 | Not-determined | Genome-fragment | NA | 0     | 0     |
| S17-final-viral-combined_k141_225167]] [full  | 2271  | No  | NA    | 2  | 0 | Low-quality    | Genome-fragment | NA | 4.86  | 0     |
| S17_k141_167225                               | 2271  | No  | NA    | 0  | 2 | Low-quality    | Genome-fragment | NA | 3     | 0     |
| S17-final-viral-combined_k141_40206]] [full   | 3096  | No  | NA    | 0  | 2 | Not-determined | Genome-fragment | NA | 0     | 0     |
| S12_k141_242069                               | 2271  | No  | NA    | 0  | 1 | Low-quality    | Genome-fragment | NA | 4.48  | 0     |
| S5_k141_170959                                | 2272  | No  | NA    | 3  | 0 | Low-quality    | Genome-fragment | NA | 3.4   | 0     |
| S7-final-viral-combined_k141_145577]] [full   | 2272  | No  | NA    | 0  | 1 | Low-quality    | Genome-fragment | NA | 5.5   | 0     |
| S2-final-viral-combined_k141_244718]] [full   | 2272  | No  | NA    | 0  | 2 | Low-quality    | Genome-fragment | NA | 1.4   | 0     |
| S4-final-viral-combined_k141_143403]] [full   | 2272  | No  | NA    | 4  | 0 | Low-quality    | Genome-fragment | NA | 3.66  | 0     |
| S8-final-viral-combined_k141_195073]] [H2gene | 2272  | No  | NA    | 2  | 0 | Low-quality    | Genome-fragment | NA | 5.91  | 0     |
| S1-final-viral-combined_k141_217168]] [full   | 2273  | No  | NA    | 0  | 1 | Low-quality    | Genome-fragment | NA | 3.61  | 0     |
| S5-final-viral-combined_k141_83089]] [full    | 2273  | No  | NA    | 0  | 0 | Low-quality    | Genome-fragment | NA | 1.32  | 0     |
| S12-final-viral-combined_k141_85809]] [full   | 2273  | No  | NA    | 0  | 0 | Low-quality    | Genome-fragment | NA | 4     | 0     |
| S12-final-viral-combined_k141_112093]] [full  | 2273  | No  | NA    | 1  | 0 | Low-quality    | Genome-fragment | NA | 1.67  | 0     |
| S8-final-viral-combined_k141_233042]] [full   | 2273  | No  | NA    | 0  | 0 | Low-quality    | Genome-fragment | NA | 3.75  | 0     |
| S8-final-viral-combined_k141_22326]] [full    | 2273  | No  | NA    | 0  | 0 | Low-quality    | Genome-fragment | NA | 3.69  | 0     |
| S4_k141_3280                                  | 2274  | No  | NA    | 0  | 1 | Low-quality    | Genome-fragment | NA | 0.9   | 0     |
| S8-final-viral-combined_k141_134813]] [full   | 2274  | No  | NA    | 0  | 1 | Low-quality    | Genome-fragment | NA | 1.42  | 0     |
| S17-final-viral-combined_k141_28923]] [full   | 1272  | No  | NA    | 0  | 2 | Not-determined | Genome-fragment | NA | 0     | 0     |
| S5-final-viral-combined_k141_164901]] [full   | 2275  | No  | NA    | 1  | 0 | Low-quality    | Genome-fragment | NA | 4.84  | 0     |
| S17-final-viral-combined_k141_49759]] [full   | 1593  | No  | NA    | 0  | 0 | Not-determined | Genome-fragment | NA | 0     | 0     |
| S17-final-viral-combined_k141_196371]] [full  | 2275  | No  | NA    | 0  | 1 | Low-quality    | Genome-fragment | NA | 5.08  | 0     |
| S17-final-viral-combined_k141_250594]] [full  | 2121  | No  | NA    | 0  | 1 | Not-determined | Genome-fragment | NA | 3.91  | 0     |
| S12-final-viral-combined_k141_57102]] [full   | 2275  | No  | NA    | 0  | 0 | Low-quality    | Genome-fragment | NA | 0     | 0     |
| S17-final-viral-combined_k141_214923]] [full  | 6216  | No  | NA    | 0  | 0 | Not-determined | Genome-fragment | NA | 0     | 0     |
| S1-final-viral-combined_k141_337405]] [full   | 2276  | No  | NA    | 0  | 1 | Low-quality    | Genome-fragment | NA | 5.31  | 0     |
| S14-final-viral-combined_k141_28913]] [full   | 2276  | No  | NA    | 0  | 2 | Low-quality    | Genome-fragment | NA | 5.12  | 0     |
| S17-final-viral-combined_k141_26200]] [full   | 1600  | No  | NA    | 0  | 0 | Not-determined | Genome-fragment | NA | 0     | 0     |
| S7-final-viral-combined_k141_89578]] [full    | 2276  | No  | NA    | 0  | 0 | Low-quality    | Genome-fragment | NA | 5.03  | 0     |
| S12-final-viral-combined_k141_376537]] [full  | 2276  | No  | NA    | 1  | 0 | Low-quality    | Genome-fragment | NA | 3.77  | 0     |
| S17-final-viral-combined_k141_215621]] [full  | 2402  | No  | NA    | 0  | 1 | Not-determined | Genome-fragment | NA | 0     | 0     |
| S17-final-viral-combined_k141_94665]] [full   | 1081  | No  | NA    | 0  | 1 | Not-determined | Genome-fragment | NA | 0     | 0     |
| S17-final-viral-combined_k141_62890]] [full   | 1601  | No  | NA    | 0  | 2 | Not-determined | Genome-fragment | NA | 0     | 0     |
| S17-final-viral-combined_k141_86053]] [full   | 2858  | No  | NA    | 0  | 1 | Not-determined | Genome-fragment | NA | 0     | 0     |
| S12-final-viral-combined_k141_238601]] [full  | 2276  | No  | NA    | 0  | 0 | Low-quality    | Genome-fragment | NA | 7.05  | 0     |
| S6_k141_81365                                 | 2276  | No  | NA    | 1  | 0 | Low-quality    | Genome-fragment | NA | 7.08  | 0     |
| S5-final-viral-combined_k141_56421]] [H2gene  | 2277  | No  | NA    | 2  | 0 | Low-quality    | Genome-fragment | NA | 3.74  | 0     |
| S17-final-viral-combined_k141_9386]] [full    | 2277  | No  | NA    | 0  | 1 | Low-quality    | Genome-fragment | NA | 1.53  | 0     |
| S17-final-viral-combined_k141_107110]] [full  | 2927  | No  | NA    | 0  | 3 | Not-determined | Genome-fragment | NA | 0     | 0     |
| S17-final-viral-combined_k141_151933]] [full  | 2419  | No  | NA    | 0  | 1 | Not-determined | Genome-fragment | NA | 0     | 0     |
| S12_k141_362164                               | 2277  | No  | NA    | 0  | 0 | Low-quality    | Genome-fragment | NA | 2.25  | 0     |
| S17-final-viral-combined_k141_107134]] [full  | 2594  | No  | NA    | 0  | 0 | Not-determined | Genome-fragment | NA | 0     | 0     |
| S17-final-viral-combined_k141_141068]] [full  | 1598  | No  | NA    | 0  | 0 | Not-determined | Genome-fragment | NA | 0     | 0     |
| S2-final-viral-combined_k141_56368]] [full    | 2277  | No  | NA    | 0  | 2 | Low-quality    | Genome-fragment | NA | 0.24  | 0     |
| S6-final-viral-combined_k141_61796]] [full    | 1801  | No  | NA    | 0  | 0 | Low-quality    | Genome-fragment | NA | 2.61  | 0     |
| S17-final-viral-combined_k141_40374]] [full   | 1801  | No  | NA    | 0  | 1 | Not-determined | Genome-fragment | NA | 0     | 0     |
| S17-final-viral-combined_k141_86107]] [full   | 2671  | No  | NA    | 0  | 3 | Not-determined | Genome-fragment | NA | 0     | 0     |
| S1-final-viral-combined_k141_187452]] [full   | 2278  | No  | NA    | 0  | 0 | Low-quality    | Genome-fragment | NA | 5.65  | 0     |
| S1-final-viral-combined_k141_340649]] [full   | 2278  | No  | NA    | 0  | 1 | Low-quality    | Genome-fragment | NA | 4.38  | 0     |
| S2-final-viral-combined_k141_116114]] [full   | 2278  | No  | NA    | 0  | 1 | Low-quality    | Genome-fragment | NA | 3.65  | 0     |
| S17-final-viral-combined_k141_119940]] [full  | 1278  | No  | NA    | 0  | 1 | Not-determined | Genome-fragment | NA | 0     | 0     |
| S4-final-viral-combined_k141_73558]] [full    | 2278  | No  | NA    | 0  | 0 | Low-quality    | Genome-fragment | NA | 2.91  | 0     |
| S17-final-viral-combined_k141_162058]] [full  | 15336 | No  | NA    | 0  | 4 | Not-determined | Genome-fragment | NA | 0     | 0     |
| S14-final-viral-combined_k141_289640]] [full  | 2279  | No  | NA    | 0  | 0 | Low-quality    | Genome-fragment | NA | 1.69  | 0     |
| S17-final-viral-combined_k141_161075]] [full  | 1134  | No  | NA    | 0  | 0 | Not-determined | Genome-fragment | NA | 0     | 0     |
| S17-final-viral-combined_k141_262099]] [full  | 1390  | No  | NA    | 0  | 0 | Not-determined | Genome-fragment | NA | 0     | 0     |
| S17-final-viral-combined_k141_250695]] [full  | 1161  | No  | NA    | 0  | 8 | Not-determined | Genome-fragment | NA | 0     | 0     |
| S17-final-viral-combined_k141_219560]] [full  | 2817  | No  | NA    | 0  | 1 | Not-determined | Genome-fragment | NA | 0     | 0     |
| S3-final-viral-combined_k141_129540]] [full   | 2279  | No  | NA    | 0  | 0 | Low-quality    | Genome-fragment | NA | 6.14  | 0     |
| S4-final-viral-combined_k141_109975]] [full   | 2279  | No  | NA    | 2  | 0 | Low-quality    | Genome-fragment | NA | 3.76  | 0     |
| S8-final-viral-combined_k141_180932]] [full   | 2279  | No  | NA    | 0  | 0 | Low-quality    | Genome-fragment | NA | 2.67  | 0     |
| S5-final-viral-combined_k141_91210]] [full    | 2280  | No  | NA    | 0  | 2 | Low-quality    | Genome-fragment | NA | 4.28  | 0     |
| S17-final-viral-combined_k141_262151]] [full  | 1174  | No  | NA    | 0  | 2 | Not-determined | Genome-fragment | NA | 0     | 0     |
| S12_k141_5489                                 | 2280  | No  | NA    | 1  | 0 | Low-quality    | Genome-fragment | NA | 5.42  | 0     |
| S4-final-viral-combined_k141_14820]] [full    | 2280  | No  | NA    | 0  | 0 | Low-quality    | Genome-fragment | NA | 1.26  | 0     |
| S1-final-viral-combined_k141_109733]] [full   | 2281  | No  | NA    | 3  | 0 | Low-quality    | Genome-fragment | NA | 5.5   | 0     |
| S5-final-viral-combined_k141_30694]] [full    | 2281  | No  | NA    | 3  | 0 | Low-quality    | Genome-fragment | NA | 5.06  | 0     |
| S17-final-viral-combined_k141_74460]] [full   | 4614  | No  | NA    | 0  | 1 | Not-determined | Genome-fragment | NA | 0     | 0     |
| S12-final-viral-combined_k141_73483]] [full   | 2281  | No  | NA    | 0  | 1 | Low-quality    | Genome-fragment | NA | 5.59  | 0     |
| S17-final-viral-combined_k141_86171]] [full   | 4822  | No  | NA    | 0  | 3 | Not-determined | Genome-fragment | NA | 0     | 0     |
| S17-final-viral-combined_k141_141181]] [full  | 5864  | No  | NA    | 0  | 0 | Not-determined | Genome-fragment | NA | 0     | 0     |
| S12-final-viral-combined_k141_45811]] [full   | 2281  | No  | NA    | 0  | 0 | Low-quality    | Genome-fragment | NA | 4.23  | 0     |
| S17-final-viral-combined_k141_141184]] [full  | 2885  | No  | NA    | 0  | 2 | Not-determined | Genome-fragment | NA | 0     | 0     |
| S17-final-viral-combined_k141_208385]] [full  | 3572  | No  | NA    | 0  | 1 | Not-determined | Genome-fragment | NA | 0     | 0     |
| S17-final-viral-combined_k141_86184]] [full   | 9255  | No  | NA    | 0  | 6 | Not-determined | Genome-fragment | NA | 0     | 0     |
| S17-final-viral-combined_k141_29054]] [full   | 3078  | No  | NA    | 0  | 1 | Not-determined | Genome-fragment | NA | 0     | 0     |
| S17-final-viral-combined_k141_141199]] [full  | 3381  | No  | NA    | 0  | 3 | Not-determined | Genome-fragment | NA | 2.73  | 0     |
| S12_k141_165670                               | 2281  | No  | NA    | 0  | 0 | Low-quality    | Genome-fragment | NA | 2.79  | 0     |
| S2_k141_202083                                | 2281  | No  | NA    | 0  | 1 | Low-quality    | Genome-fragment | NA | 0.61  | 0     |
| S17-final-viral-combined_k141_162194]] [full  | 3606  | No  | NA    | 0  | 3 | Not-determined | Genome-fragment | NA | 0     | 0     |
| S17-final-viral-combined_k141_174296]] [full  | 4267  | No  | NA    | 0  | 3 | Not-determined | Genome-fragment | NA | 0     | 0     |
| S17-final-viral-combined_k141_86207]] [full   | 2256  |     |       |    |   |                |                 |    |       |       |



|                                            |       |        |     |       |    |    |                |                 |       |       |
|--------------------------------------------|-------|--------|-----|-------|----|----|----------------|-----------------|-------|-------|
| S17-final-viral-combined_k141_139679]      | [full | 2286   | Yes | 429   | 1  | 1  | Low-quality    | Genome-fragment | 0.56  | 81.23 |
| S17-final-viral-combined_k141_208670]      | [full | 1070   | No  |       | 1  | 0  | Not-determined | Genome-fragment | NA    | 0     |
| S12-final-viral-combined_k141_385742]      | [full | 2286   | No  |       | 0  | 1  | Low-quality    | Genome-fragment | 5.07  | 0     |
| S17-final-viral-combined_k141_17479]       | [full | 1437   | No  |       | 0  | 1  | Not-determined | Genome-fragment | NA    | 0     |
| S17-final-viral-combined_k141_29209]       | [full | 1612   | No  |       | 0  | 1  | Not-determined | Genome-fragment | NA    | 0     |
| S12-final-viral-combined_k141_186064]      | [full | 2286   | No  |       | 1  | 0  | Low-quality    | Genome-fragment | 4.12  | 0     |
| S17-final-viral-combined_k141_231047]      | [full | 3418   | No  |       | 0  | 2  | Not-determined | Genome-fragment | NA    | 0     |
| S17-final-viral-combined_k141_34908]       | [full | 2195   | No  |       | 0  | 2  | Not-determined | Genome-fragment | NA    | 0     |
| S2-final-viral-combined_k141_207488]       | [full | 2286   | No  |       | 0  | 0  | Low-quality    | Genome-fragment | 5.67  | 0     |
| S17-final-viral-combined_k141_208742]      | [full | 2089   | No  |       | 0  | 1  | Not-determined | Genome-fragment | NA    | 0     |
| S2-final-viral-combined_k141_85229]        | [full | 2286   | No  |       | 1  | 0  | Low-quality    | Genome-fragment | 4.85  | 0     |
| S5-final-viral-combined_k141_194671]       | [full | 2287   | No  |       | 0  | 1  | Low-quality    | Genome-fragment | 5.12  | 0     |
| S7-final-viral-combined_k141_71438]        | [full | 2287   | No  |       | 0  | 0  | Low-quality    | Genome-fragment | 1.66  | 0     |
| S17-final-viral-combined_k141_186314]      | [full | 102104 | Yes | 39966 | 16 | 39 | Complete       | High-quality    | 100   | 60.86 |
| S17-final-viral-combined_k141_231122]      | [full | 2346   | No  |       | 0  | 0  | Not-determined | Genome-fragment | NA    | 0     |
| S2-final-viral-combined_k141_184607]       | [full | 2287   | No  |       | 1  | 0  | Low-quality    | Genome-fragment | 2.44  | 0     |
| S17-final-viral-combined_k141_186315]      | [full | 2433   | No  |       | 0  | 1  | Not-determined | Genome-fragment | NA    | 0     |
| S17-final-viral-combined_k141_210296]      | [full | 2700   | No  |       | 0  | 2  | Not-determined | Genome-fragment | NA    | 0     |
| S17-final-viral-combined_k141_219900]      | [full | 1712   | No  |       | 0  | 1  | Not-determined | Genome-fragment | NA    | 0     |
| S17-final-viral-combined_k141_208784]      | [full | 6561   | No  |       | 0  | 0  | Not-determined | Genome-fragment | NA    | 0     |
| S12-final-viral-combined_k141_265462]      | [full | 2288   | No  |       | 1  | 0  | Low-quality    | Genome-fragment | 5.79  | 0     |
| S17-final-viral-combined_k141_144240]      | [full | 2288   | No  |       | 0  | 0  | Low-quality    | Genome-fragment | 10.33 | 0     |
| S17-final-viral-combined_k141_6960]        | [full | 3287   | No  |       | 0  | 3  | Not-determined | Genome-fragment | NA    | 0     |
| S17-final-viral-combined_k141_262531]      | [full | 3000   | No  |       | 0  | 2  | Not-determined | Genome-fragment | NA    | 0     |
| S4-final-viral-combined_k141_91416]        | [full | 2288   | No  |       | 3  | 0  | Low-quality    | Genome-fragment | 5.51  | 0     |
| S17-final-viral-combined_k141_162492]      | [full | 1460   | No  |       | 0  | 2  | Not-determined | Genome-fragment | NA    | 0     |
| S17-final-viral-combined_k141_208814]      | [full | 2400   | No  |       | 0  | 1  | Not-determined | Genome-fragment | NA    | 0     |
| S6-final-viral-combined_k141_138986]       | [full | 2289   | No  |       | 1  | 0  | Low-quality    | Genome-fragment | 2.83  | 0     |
| S11-final-viral-combined_k141_292071]      | [full | 2290   | No  |       | 0  | 0  | Low-quality    | Genome-fragment | 5.27  | 0     |
| S17-final-viral-combined_k141_50140]       | [full | 1298   | No  |       | 0  | 2  | Not-determined | Genome-fragment | NA    | 0     |
| S1-final-viral-combined_k141_269081]       | [full | 2290   | No  |       | 0  | 1  | Low-quality    | Genome-fragment | 4.91  | 0     |
| S7-final-viral-combined_k141_253380]       | [full | 2290   | No  |       | 0  | 0  | Low-quality    | Genome-fragment | 6.62  | 0     |
| S17-final-viral-combined_k141_86577]       | [full | 1870   | No  |       | 0  | 1  | Not-determined | Genome-fragment | NA    | 0     |
| S17-final-viral-combined_k141_231192]      | [full | 1132   | No  |       | 0  | 1  | Not-determined | Genome-fragment | NA    | 0     |
| S12-final-viral-combined_k141_335812]      | [full | 2290   | No  |       | 0  | 0  | Low-quality    | Genome-fragment | 6.22  | 0     |
| S12_k141_227737]                           | [full | 2290   | No  |       | 0  | 0  | Low-quality    | Genome-fragment | 1.52  | 0     |
| S17-final-viral-combined_k141_240886]      | [full | 4795   | No  |       | 0  | 3  | Not-determined | Genome-fragment | NA    | 0     |
| S12_k141_264927]                           | [full | 2290   | No  |       | 0  | 0  | Low-quality    | Genome-fragment | 2.29  | 0     |
| S17-final-viral-combined_k141_231213]      | [full | 2360   | No  |       | 0  | 2  | Not-determined | Genome-fragment | NA    | 0     |
| S9_k141_77907]                             | [full | 2291   | No  |       | 1  | 0  | Low-quality    | Genome-fragment | 6.1   | 0     |
| S17-final-viral-combined_k141_86609]       | [full | 3023   | No  |       | 0  | 1  | Not-determined | Genome-fragment | NA    | 24.3  |
| S2-final-viral-combined_k141_62189]        | [full | 2291   | No  |       | 0  | 0  | Low-quality    | Genome-fragment | NA    | 0     |
| S17-final-viral-combined_k141_162561]      | [full | 1642   | No  |       | 0  | 0  | Not-determined | Genome-fragment | NA    | 0     |
| S17-final-viral-combined_k141_186460]      | [full | 1270   | No  |       | 0  | 1  | Not-determined | Genome-fragment | NA    | 0     |
| S2-final-viral-combined_k141_231459]       | [full | 2291   | No  |       | 0  | 0  | Low-quality    | Genome-fragment | 1.65  | 0     |
| S6-final-viral-combined_k141_100235]       | [full | 2291   | Yes | 750   | 1  | 0  | Not-determined | Genome-fragment | 0.93  | 67.26 |
| S6-final-viral-combined_k141_56566]        | [full | 2291   | No  |       | 4  | 0  | Low-quality    | Genome-fragment | 4.96  | 0     |
| S17-final-viral-combined_k141_120431]      | [full | 2334   | No  |       | 0  | 2  | Not-determined | Genome-fragment | NA    | 0     |
| S12-final-viral-combined_k141_358965]      | [full | 2292   | No  |       | 0  | 0  | Low-quality    | Genome-fragment | 6.2   | 0     |
| S17-final-viral-combined_k141_141676]      | [full | 2887   | No  |       | 0  | 0  | Not-determined | Genome-fragment | NA    | 0     |
| S17-final-viral-combined_k141_240939]      | [full | 2875   | No  |       | 0  | 2  | Not-determined | Genome-fragment | NA    | 3.7   |
| S2-final-viral-combined_k141_240277]       | [full | 2292   | No  |       | 0  | 0  | Low-quality    | Genome-fragment | 3.62  | 0     |
| S2-final-viral-combined_k141_154367]       | [full | 2292   | No  |       | 0  | 0  | Low-quality    | Genome-fragment | 2.07  | 0     |
| S4-final-viral-combined_k141_49045]        | [full | 2292   | No  |       | 0  | 0  | Low-quality    | Genome-fragment | 3.8   | 0     |
| S17-final-viral-combined_k141_186523]      | [full | 1015   | No  |       | 0  | 1  | Not-determined | Genome-fragment | NA    | 0     |
| S17-final-viral-combined_k141_324458]      | [full | 3783   | No  |       | 0  | 2  | Not-determined | Genome-fragment | NA    | 0     |
| S17-final-viral-combined_k141_86670]       | [full | 2202   | No  |       | 0  | 2  | Not-determined | Genome-fragment | NA    | 0     |
| S4-final-viral-combined_k141_45250]        | [full | 2292   | No  |       | 0  | 2  | Low-quality    | Genome-fragment | 1.06  | 0     |
| S12-final-viral-combined_k141_97441[NoGene | [full | 2293   | No  |       | 0  | 0  | Low-quality    | Genome-fragment | 3.62  | 0     |
| S4-final-viral-combined_k141_17780]        | [full | 2293   | No  |       | 0  | 0  | Low-quality    | Genome-fragment | 16.16 | 0     |
| S17-final-viral-combined_k141_162629]      | [full | 5635   | No  |       | 0  | 3  | Not-determined | Genome-fragment | NA    | 0     |
| S17-final-viral-combined_k141_186565]      | [full | 1111   | No  |       | 0  | 1  | Not-determined | Genome-fragment | NA    | 0     |
| S17-final-viral-combined_k141_197677]      | [full | 1191   | No  |       | 0  | 0  | Not-determined | Genome-fragment | NA    | 0     |
| S17-final-viral-combined_k141_186580]      | [full | 1702   | No  |       | 0  | 0  | Not-determined | Genome-fragment | NA    | 0     |
| S17-final-viral-combined_k141_107702]      | [full | 1642   | No  |       | 0  | 0  | Not-determined | Genome-fragment | NA    | 0     |
| S17-final-viral-combined_k141_86733]       | [full | 4525   | No  |       | 0  | 4  | Not-determined | Genome-fragment | NA    | 0     |
| S17-final-viral-combined_k141_7106]        | [full | 3838   | No  |       | 0  | 1  | Not-determined | Genome-fragment | NA    | 0     |
| S17-final-viral-combined_k141_186600]      | [full | 10915  | No  |       | 0  | 8  | Not-determined | Genome-fragment | NA    | 0     |
| S11-final-viral-combined_k141_55731]       | [full | 2295   | No  |       | 0  | 0  | Low-quality    | Genome-fragment | 2.65  | 0     |
| S17-final-viral-combined_k141_71512]       | [full | 1223   | No  |       | 0  | 1  | Not-determined | Genome-fragment | NA    | 0     |
| S17-final-viral-combined_k141_40581]       | [full | 1738   | No  |       | 0  | 2  | Not-determined | Genome-fragment | NA    | 0     |
| S17-final-viral-combined_k141_141726]      | [full | 2409   | No  |       | 0  | 1  | Not-determined | Genome-fragment | NA    | 0     |
| S1-final-viral-combined_k141_62633]        | [full | 2295   | No  |       | 0  | 2  | Low-quality    | Genome-fragment | 1.91  | 0     |
| S17-final-viral-combined_k141_17721]       | [full | 7347   | No  |       | 0  | 5  | Not-determined | Genome-fragment | NA    | 0     |
| S17-final-viral-combined_k141_13007]       | [full | 1161   | No  |       | 0  | 1  | Not-determined | Genome-fragment | NA    | 0     |
| S17-final-viral-combined_k141_162681]      | [full | 1915   | No  |       | 0  | 2  | Not-determined | Genome-fragment | NA    | 0     |
| S17-final-viral-combined_k141_220171]      | [full | 4120   | No  |       | 0  | 3  | Not-determined | Genome-fragment | NA    | 0     |
| S17-final-viral-combined_k141_186641]      | [full | 1541   | No  |       | 0  | 0  | Not-determined | Genome-fragment | NA    | 0     |
| S17-final-viral-combined_k141_220176]      | [full | 1270   | No  |       | 0  | 2  | Not-determined | Genome-fragment | NA    | 0     |
| S3-final-viral-combined_k141_132658]       | [full | 2295   | No  |       | 0  | 0  | Low-quality    | Genome-fragment | 3.87  | 0     |
| S6_k141_49778]                             | [full | 2295   | No  |       | 0  | 0  | Low-quality    | Genome-fragment | 2.43  | 0     |
| S17-final-viral-combined_k141_220185]      | [full | 2542   | No  |       | 0  | 4  | Not-determined | Genome-fragment | NA    | 0     |
| S17-final-viral-combined_k141_162696]      | [full | 1654   | No  |       | 0  | 1  | Not-determined | Genome-fragment | NA    | 0     |
| S17-final-viral-combined_k141_107744]      | [full | 1239   | No  |       | 0  | 2  | Not-determined | Genome-fragment | NA    | 0     |
| S11-final-viral-combined_k141_46965]       | [full | 2296   | No  |       | 0  | 1  | Low-quality    | Genome-fragment | 4.47  | 0     |
| S17-final-viral-combined_k141_162717]      | [full | 2206   | No  |       | 0  | 1  | Not-determined | Genome-fragment | NA    | 0     |
| S1-final-viral-combined_k141_141646]       | [full | 2296   | No  |       | 0  | 0  | Low-quality    | Genome-fragment | 3.79  | 0     |
| S17-final-viral-combined_k141_17780]       | [full | 1460   | No  |       | 0  | 1  | Not-determined | Genome-fragment | NA    | 0     |
| S17-final-viral-combined_k141_174976]      | [full | 3665   | No  |       | 0  | 1  | Not-determined | Genome-fragment | NA    | 0     |
| S5-final-viral-combined_k141_58088]        | [full | 2296   | No  |       | 0  | 0  | Low-quality    | Genome-fragment | 3.36  | 0     |
| S17-final-viral-combined_k141_251114]      | [full | 1435   | No  |       | 0  | 1  | Not-determined | Genome-fragment | NA    | 0     |
| S17-k141_250389                            | [full | 2296   | No  |       | 0  | 0  | Low-quality    | Genome-fragment | 4.38  | 0     |
| S17-final-viral-combined_k141_63602]       | [full | 1805   | No  |       | 0  | 0  | Not-determined | Genome-fragment | NA    | 0     |
| S17-final-viral-combined_k141_241094]      | [full | 1540   | No  |       | 0  | 0  | Not-determined | Genome-fragment | NA    | 0     |
| S12-final-viral-combined_k141_169651]      | [full | 2296   | No  |       | 0  | 0  | Low-quality    | Genome-fragment | 6.09  | 0     |
| S12-final-viral-combined_k141_359154]      | [full | 2296   | No  |       | 1  | 0  | Low-quality    | Genome-fragment | 2.14  | 0     |
| S17-final-viral-combined_k141_209115]      | [full | 1887   | No  |       | 0  | 0  | Not-determined | Genome-fragment | NA    | 0     |
| S17-final-viral-combined_k141_95155]       | [full | 3768   | No  |       | 0  | 0  | Not-determined | Genome-fragment | NA    | 0     |
| S17-final-viral-combined_k141_251143]      | [full | 1253   | No  |       | 0  | 0  | Not-determined | Genome-fragment | NA    | 0     |
| S17-final-viral-combined_k141_241120]      | [full | 6754   | No  |       | 0  | 1  | Not-determined | Genome-fragment | NA    | 0     |
| S17-final-viral-combined_k141_251156]      | [full | 1170   | No  |       | 0  | 0  | Not-determined | Genome-fragment | NA    | 0     |
| S12-final-viral-combined_k141_927591]      | [full | 2297   | No  |       | 0  | 1  | Low-quality    | Genome-fragment | 0.97  | 0     |
| S2-final-viral-combined_k141_43600]        | [full | 2297   | No  |       | 0  | 1  | Low-quality    | Genome-fragment | 3.97  | 0     |
| S17-final-viral-combined_k141_72477]       | [full | 1699   | No  |       | 0  | 0  | Not-determined | Genome-fragment | NA    | 4.2   |
| S6-final-viral-combined_k141_68988]        | [full | 2297   | No  |       | 0  | 2  | Low-quality    | Genome-fragment | NA    | 0     |
| S17-final-viral-combined_k141_241130]      | [full | 2075   | No  |       | 0  | 0  | Not-determined | Genome-fragment | NA    | 0     |
| S1-final-viral-combined_k141_203509]       | [full | 2298   | No  |       | 0  | 0  | Low-quality    | Genome-fragment | 2.82  | 0     |
| S17-final-viral-combined_k141_141819]      | [full | 1629   | No  |       | 0  | 0  | Not-determined | Genome-fragment | NA    | 0     |
| S17-final-viral-combined_k141_251183]      | [full | 1253   | No  |       | 0  | 0  | Not-determined | Genome-fragment | NA    | 0     |
| S17-final-viral-combined_k141_251195]      | [full | 1873   | No  |       | 0  | 0  | Not-determined | Genome-fragment | NA    | 0     |
| S5-final-viral-combined_k141_12165]        | [full | 2298   | No  |       | 0  | 1  | Low-quality    | Genome-fragment | 1.91  | 0     |
| S17-final-viral-combined_k141_197824]      | [full | 4792   | No  |       | 0  | 2  | Not-determined | Genome-fragment | NA    | 0     |
| S12-final-viral-combined_k141_139754]      | [full | 2298   | No  |       | 3  | 0  | Low-quality    | Genome-fragment | 4.96  | 0     |
| S17-final-viral-combined_k141_220295]      | [full | 2665   | No  |       | 0  | 2  | Not-determined | Genome-fragment | NA    | 5.4   |
| S12_k141_189239                            | [full | 2298   | No  |       | 0  | 0  | Low-quality    | Genome-fragment | NA    | 0     |
| S17-final-viral-combined_k141_209147]      | [full | 1625   | No  |       | 0  | 2  | Not-determined | Genome-fragment | NA    | 0     |
| S8-final-viral-combined_k141_12696]        | [full | 2298   | No  |       | 0  | 0  | Low-quality    | Genome-fragment | 3.8   | 0     |
| S17-final-viral-combined_k141_209162]      | [full | 1542   | No  |       | 0  | 2  | Not-determined | Genome-fragment | NA    | 0     |
| S1-final-viral-combined_k141_172028]       | [full | 2299   | No  |       | 0  | 2  | Low-quality    | Genome-fragment | 3.91  | 0     |
| S12-final-viral-combined_k141_88936]       | [full | 2299   | No  |       | 0  | 2  | Low-quality    | Genome-fragment | 3.73  | 0     |
| S17-final-viral-combined_k141_197837]      | [full | 1514   | No  |       | 0  | 0  | Not-determined | Genome-fragment | NA    | 1.12  |
| S2-final-viral-combined_k141_881615]       | [full | 2300   | No  |       | 0  | 0  | Low-quality    | Genome-fragment | NA    | 0     |
| S17-final-viral-combined_k141_175049]      | [full | 1964   | No  |       | 0  | 1  | Not-determined | Genome-fragment | NA    | 0     |
| S7-final-viral-combined_k141_209627]       | [full | 2300   | No  |       | 0  | 0  | Low-quality    | Genome-fragment | 4.87  | 0     |
| S7-final-viral-combined_k141_212144]       | [full | 2300   | No  |       | 0  | 0  | Low-quality    | Genome-fragment | 3.6   | 0     |
| S17-final-viral-combined_k141_186763]      | [full | 1480   | No  |       | 0  | 1  | Not-determined | Genome-fragment | NA    | 0     |
| S11_k141_140080                            | [full | 2301   | No  |       | 1  | 0  | Low-quality    | Genome-fragment | 1.02  | 0     |
| S17-final-viral-combined_k141_231611]      | [full | 2568   | No  |       | 2  | 2  | Not-determined | Genome-fragment | NA    | 0     |
| S1-final-viral-combined_k141_36015]        | [full | 2301   | Yes | 372   | 1  | 0  | Low-quality    | Genome-fragment | 0.68  | 83.83 |
| S9-final-viral-combined_k141_29598]        | [full | 2302   | No  |       | 0  | 0  | Low-quality    | Genome-fragment | 5.69  | 0     |
| S17-final-viral-combined_k141_17907]       | [full | 1841   | No  |       | 0  | 0  | Not-determined | Genome-fragment | NA    | 0     |
| S17-final                                  |       |        |     |       |    |    |                |                 |       |       |



|                                      |          |        |     |       |    |    |                |                 |       |       |
|--------------------------------------|----------|--------|-----|-------|----|----|----------------|-----------------|-------|-------|
| S17-final-viral-combined_k141_75161  | [full]   | 1145   | No  | NA    | 0  | 1  | Not-determined | Genome-fragment | NA    | 0     |
| S17-final-viral-combined_k141_120871 | [full]   | 1213   | No  | NA    | 0  | 0  | Not-determined | Genome-fragment | NA    | 0     |
| S17-final-viral-combined_k141_262839 | [full]   | 1405   | No  | NA    | 0  | 0  | Not-determined | Genome-fragment | NA    | 0     |
| S17-final-viral-combined_k141_241416 | [full]   | 1059   | No  | NA    | 0  | 2  | Not-determined | Genome-fragment | NA    | 0     |
| S17-final-viral-combined_k141_202328 | [full]   | 2305   | No  | NA    | 0  | 0  | Low-quality    | Genome-fragment | NA    | 0     |
| S17-final-viral-combined_k141_164501 | [full]   | 2305   | No  | NA    | 2  | 0  | Low-quality    | Genome-fragment | 4.31  | 0     |
| S17-final-viral-combined_k141_120987 | [full]   | 6420   | No  | NA    | 0  | 5  | Not-determined | Genome-fragment | NA    | 0     |
| S17-final-viral-combined_k141_120989 | [full]   | 1010   | No  | NA    | 0  | 1  | Not-determined | Genome-fragment | NA    | 0     |
| S17-final-viral-combined_k141_87271  | [full]   | 2597   | No  | NA    | 0  | 0  | Not-determined | Genome-fragment | NA    | 0     |
| S17-final-viral-combined_k141_95360  | [full]   | 128207 | Yes | 33366 | 17 | 74 | Complete       | High-quality    | 100   | 73.97 |
| S12-final-viral-combined_k141_103405 | [full]   | 2305   | No  | NA    | 0  | 0  | Low-quality    | Genome-fragment | 4.8   | 0     |
| S17-final-viral-combined_k141_75651  | [full]   | 2149   | No  | NA    | 0  | 1  | Not-determined | Genome-fragment | NA    | 0     |
| S17-final-viral-combined_k141_63996  | [full]   | 1826   | No  | NA    | 0  | 1  | Not-determined | Genome-fragment | NA    | 0     |
| S17-final-viral-combined_k141_142133 | [full]   | 1565   | No  | NA    | 0  | 1  | Not-determined | Genome-fragment | NA    | 0     |
| S17-final-viral-combined_k141_75688  | [full]   | 5660   | No  | NA    | 0  | 0  | Not-determined | Genome-fragment | NA    | 0     |
| S17-final-viral-combined_k141_10807  | [full]   | 2962   | No  | NA    | 0  | 1  | Not-determined | Genome-fragment | NA    | 0     |
| S17-final-viral-combined_k141_130215 | [full]   | 30179  | No  | NA    | 16 | 1  | Medium-quality | Genome-fragment | 89.39 | 0     |
| S17-final-viral-combined_k141_121037 | [full]   | 2705   | No  | NA    | 0  | 3  | Not-determined | Genome-fragment | NA    | 0     |
| S17-final-viral-combined_k141_87281  | [full]   | 1209   | No  | NA    | 0  | 1  | Not-determined | Genome-fragment | NA    | 0     |
| S17-final-viral-combined_k141_220750 | [full]   | 1666   | No  | NA    | 0  | 1  | Not-determined | Genome-fragment | NA    | 0     |
| S12-final-viral-combined_k141_226444 | [full]   | 2305   | No  | NA    | 3  | 0  | Low-quality    | Genome-fragment | 3.77  | 0     |
| S17-final-viral-combined_k141_142171 | [full]   | 2528   | No  | NA    | 0  | 2  | Not-determined | Genome-fragment | NA    | 0     |
| S9-final-viral-combined_k141_29274   | [full]   | 2306   | No  | NA    | 0  | 0  | Low-quality    | Genome-fragment | 2.54  | 0     |
| S17-final-viral-combined_k141_198195 | [full]   | 2023   | No  | NA    | 0  | 0  | Not-determined | Genome-fragment | NA    | 0     |
| S17-final-viral-combined_k141_7618   | [full]   | 6401   | No  | NA    | 0  | 5  | Not-determined | Genome-fragment | NA    | 0     |
| S17-final-viral-combined_k141_108107 | [full]   | 1478   | No  | NA    | 0  | 1  | Not-determined | Genome-fragment | NA    | 0     |
| S7-final-viral-combined_k141_116793  | [full]   | 2306   | No  | NA    | 2  | 0  | Low-quality    | Genome-fragment | 4.23  | 0     |
| S17-final-viral-combined_k141_50716  | [full]   | 1161   | No  | NA    | 0  | 1  | Not-determined | Genome-fragment | NA    | 0     |
| S17-final-viral-combined_k141_29591  | [full]   | 4818   | No  | NA    | 0  | 4  | Not-determined | Genome-fragment | NA    | 0     |
| S7-final-viral-combined_k141_244160  | [full]   | 2306   | Yes | 543   | 1  | 1  | Low-quality    | Genome-fragment | 0.67  | 76.45 |
| S11-final-viral-combined_k141_223921 | [full]   | 2307   | No  | NA    | 0  | 1  | Low-quality    | Genome-fragment | 3.05  | 0     |
| S1-final-viral-combined_k141_298520  | [full]   | 2307   | No  | NA    | 0  | 2  | Low-quality    | Genome-fragment | 1.08  | 0     |
| S17-final-viral-combined_k141_95443  | [full]   | 1725   | No  | NA    | 0  | 1  | Not-determined | Genome-fragment | NA    | 0     |
| S17-final-viral-combined_k141_220789 | [full]   | 3862   | No  | NA    | 0  | 1  | Not-determined | Genome-fragment | NA    | 0     |
| S17-final-viral-combined_k141_262951 | [full]   | 1342   | No  | NA    | 0  | 1  | Not-determined | Genome-fragment | NA    | 0     |
| S17-final-viral-combined_k141_87100  | [full]   | 2159   | No  | NA    | 0  | 2  | Not-determined | Genome-fragment | NA    | 0     |
| S17-final-viral-combined_k141_181751 | [full]   | 1721   | No  | NA    | 0  | 1  | Not-determined | Genome-fragment | NA    | 0     |
| S5-final-viral-combined_k141_25028   | [full]   | 2307   | No  | NA    | 1  | 0  | Low-quality    | Genome-fragment | 5.28  | 0     |
| S12-final-viral-combined_k141_179450 | [full]   | 2307   | No  | NA    | 0  | 2  | Low-quality    | Genome-fragment | 2.87  | 0     |
| S17-final-viral-combined_k141_75704  | [full]   | 1075   | No  | NA    | 0  | 1  | Not-determined | Genome-fragment | NA    | 0     |
| S17-final-viral-combined_k141_50764  | [full]   | 2192   | No  | NA    | 0  | 0  | Not-determined | Genome-fragment | NA    | 0     |
| S8_k141_272403                       | [full]   | 2307   | No  | NA    | 0  | 0  | Low-quality    | Genome-fragment | 2.51  | 0     |
| S11-final-viral-combined_k141_187358 | [full]   | 2308   | No  | NA    | 1  | 0  | Low-quality    | Genome-fragment | 3.02  | 0     |
| S1-final-viral-combined_k141_148016  | [full]   | 2308   | No  | NA    | 0  | 1  | Low-quality    | Genome-fragment | 3.58  | 0     |
| S17-final-viral-combined_k141_142252 | [full]   | 3832   | No  | NA    | 0  | 3  | Not-determined | Genome-fragment | NA    | 0     |
| S17-final-viral-combined_k141_18126  | [full]   | 2029   | No  | NA    | 0  | 0  | Not-determined | Genome-fragment | NA    | 0     |
| S5-final-viral-combined_k141_80874   | [full]   | 2308   | No  | NA    | 0  | 1  | Low-quality    | Genome-fragment | 1.6   | 0     |
| S6-final-viral-combined_k141_16570   | [full]   | 2308   | No  | NA    | 2  | 0  | Low-quality    | Genome-fragment | 5.04  | 0     |
| S11-final-viral-combined_k141_758    | [full]   | 2309   | No  | NA    | 0  | 0  | Low-quality    | Genome-fragment | 0     | 4     |
| S17-final-viral-combined_k141_231865 | [full]   | 1085   | No  | NA    | 0  | 0  | Not-determined | Genome-fragment | NA    | 3.61  |
| S1_k141_101777                       | [full]   | 2309   | No  | NA    | 1  | 0  | Low-quality    | Genome-fragment | NA    | 0     |
| S17-final-viral-combined_k141_95516  | [full]   | 1466   | No  | NA    | 0  | 0  | Not-determined | Genome-fragment | NA    | 0     |
| S12-final-viral-combined_k141_297643 | [H2gene] | 2309   | No  | NA    | 1  | 0  | Low-quality    | Genome-fragment | 3.88  | 0     |
| S17-final-viral-combined_k141_75780  | [full]   | 1691   | No  | NA    | 0  | 1  | Not-determined | Genome-fragment | NA    | 0     |
| S17-final-viral-combined_k141_231881 | [full]   | 4263   | No  | NA    | 0  | 3  | Not-determined | Genome-fragment | NA    | 0     |
| S17-final-viral-combined_k141_161336 | [full]   | 3511   | No  | NA    | 0  | 2  | Not-determined | Genome-fragment | NA    | 0     |
| S17-final-viral-combined_k141_241609 | [full]   | 2573   | No  | NA    | 0  | 2  | Not-determined | Genome-fragment | NA    | 0     |
| S17-final-viral-combined_k141_187145 | [full]   | 3195   | No  | NA    | 0  | 1  | Not-determined | Genome-fragment | NA    | 0     |
| S2_k141_142205                       | [full]   | 2309   | No  | NA    | 0  | 0  | Low-quality    | Genome-fragment | 0.42  | 0     |
| S17-final-viral-combined_k141_120859 | [full]   | 3492   | No  | NA    | 0  | 2  | Not-determined | Genome-fragment | NA    | 0     |
| S17-final-viral-combined_k141_187173 | [full]   | 1025   | No  | NA    | 0  | 0  | Not-determined | Genome-fragment | NA    | 0     |
| S17-final-viral-combined_k141_87408  | [full]   | 1863   | No  | NA    | 0  | 1  | Not-determined | Genome-fragment | NA    | 0     |
| S17-final-viral-combined_k141_263066 | [full]   | 1204   | No  | NA    | 0  | 0  | Not-determined | Genome-fragment | NA    | 0     |
| S17-final-viral-combined_k141_187173 | [full]   | 1770   | No  | NA    | 0  | 1  | Not-determined | Genome-fragment | NA    | 0     |
| S17-final-viral-combined_k141_241416 | [full]   | 1827   | No  | NA    | 0  | 1  | Not-determined | Genome-fragment | NA    | 5.44  |
| S4-final-viral-combined_k141_11548   | [full]   | 2309   | No  | NA    | 4  | 0  | Low-quality    | Genome-fragment | 3.17  | 0     |
| S4-final-viral-combined_k141_69546   | [full]   | 2309   | No  | NA    | 0  | 1  | Low-quality    | Genome-fragment | 1.02  | 0     |
| S11-final-viral-combined_k141_166975 | [full]   | 2310   | No  | NA    | 1  | 0  | Low-quality    | Genome-fragment | 4.03  | 0     |
| S1-final-viral-combined_k141_112388  | [full]   | 2310   | No  | NA    | 0  | 0  | Low-quality    | Genome-fragment | 0.76  | 0     |
| S1_k141_56737                        | [full]   | 2310   | No  | NA    | 1  | 0  | Low-quality    | Genome-fragment | 2.11  | 0     |
| S17-final-viral-combined_k141_187214 | [full]   | 1138   | No  | NA    | 0  | 0  | Not-determined | Genome-fragment | NA    | 0     |
| S17-final-viral-combined_k141_20926  | [full]   | 5453   | No  | NA    | 0  | 2  | Not-determined | Genome-fragment | NA    | 0     |
| S5-final-viral-combined_k141_200900  | [full]   | 2310   | No  | NA    | 3  | 0  | Low-quality    | Genome-fragment | 6.06  | 0     |
| S17-final-viral-combined_k141_75892  | [full]   | 33931  | No  | NA    | 26 | 0  | Medium-quality | Genome-fragment | 78.06 | 0     |
| S17-final-viral-combined_k141_20077  | [full]   | 1046   | No  | NA    | 0  | 1  | Not-determined | Genome-fragment | NA    | 0     |
| S17-final-viral-combined_k141_95611  | [full]   | 6336   | No  | NA    | 0  | 4  | Not-determined | Genome-fragment | NA    | 0     |
| S17-final-viral-combined_k141_163217 | [full]   | 1396   | No  | NA    | 0  | 1  | Not-determined | Genome-fragment | NA    | 0     |
| S17-final-viral-combined_k141_220968 | [full]   | 1730   | No  | NA    | 0  | 1  | Not-determined | Genome-fragment | NA    | 0     |
| S17-final-viral-combined_k141_87515  | [full]   | 3278   | No  | NA    | 0  | 2  | Not-determined | Genome-fragment | NA    | 0     |
| S7-final-viral-combined_k141_120411  | [full]   | 2310   | No  | NA    | 1  | 0  | Low-quality    | Genome-fragment | 2.59  | 0     |
| S17-final-viral-combined_k141_220994 | [full]   | 1894   | No  | NA    | 0  | 2  | Not-determined | Genome-fragment | NA    | 0     |
| S12-final-viral-combined_k141_38156  | [H2gene] | 2310   | No  | NA    | 0  | 0  | Low-quality    | Genome-fragment | 0.89  | 0     |
| S4-final-viral-combined_k141_27095   | [full]   | 2310   | No  | NA    | 2  | 0  | Low-quality    | Genome-fragment | 6.78  | 0     |
| S17-final-viral-combined_k141_142479 | [full]   | 2222   | No  | NA    | 0  | 1  | Not-determined | Genome-fragment | NA    | 0     |
| S17-final-viral-combined_k141_87540  | [full]   | 3461   | No  | NA    | 0  | 3  | Not-determined | Genome-fragment | NA    | 0     |
| S17-final-viral-combined_k141_75957  | [full]   | 2915   | No  | NA    | 0  | 2  | Not-determined | Genome-fragment | NA    | 0     |
| S17-final-viral-combined_k141_221012 | [full]   | 1747   | No  | NA    | 0  | 1  | Not-determined | Genome-fragment | NA    | 0     |
| S17-final-viral-combined_k141_130471 | [full]   | 5693   | No  | NA    | 0  | 2  | Not-determined | Genome-fragment | NA    | 0     |
| S17-final-viral-combined_k141_20567  | [full]   | 1659   | No  | NA    | 0  | 0  | Not-determined | Genome-fragment | NA    | 0     |
| S17-final-viral-combined_k141_30136  | [full]   | 2284   | No  | NA    | 0  | 3  | Not-determined | Genome-fragment | NA    | 0     |
| S11-final-viral-combined_k141_54406  | [full]   | 2311   | No  | NA    | 0  | 1  | Low-quality    | Genome-fragment | 1.65  | 0     |
| S1-final-viral-combined_k141_164051  | [full]   | 2311   | No  | NA    | 0  | 0  | Low-quality    | Genome-fragment | 5.44  | 0     |
| S12-final-viral-combined_k141_378241 | [full]   | 2311   | No  | NA    | 0  | 0  | Low-quality    | Genome-fragment | 4.97  | 0     |
| S2-final-viral-combined_k141_158645  | [full]   | 2311   | No  | NA    | 0  | 1  | Low-quality    | Genome-fragment | 5.19  | 0     |
| S17-final-viral-combined_k141_25170  | [full]   | 8127   | No  | NA    | 0  | 0  | Not-determined | Genome-fragment | NA    | 0     |
| S17-final-viral-combined_k141_153206 | [full]   | 1525   | No  | NA    | 0  | 1  | Not-determined | Genome-fragment | NA    | 0     |
| S6-final-viral-combined_k141_12080   | [full]   | 2311   | No  | NA    | 0  | 2  | Low-quality    | Genome-fragment | 1.06  | 0     |
| S17-final-viral-combined_k141_20952  | [full]   | 2123   | No  | NA    | 0  | 1  | Not-determined | Genome-fragment | NA    | 1.98  |
| S8-final-viral-combined_k141_45447   | [full]   | 2311   | No  | NA    | 0  | 1  | Low-quality    | Genome-fragment | NA    | 0     |
| S17-final-viral-combined_k141_263254 | [full]   | 17093  | No  | NA    | 0  | 11 | Not-determined | Genome-fragment | NA    | 0     |
| S17-final-viral-combined_k141_87622  | [full]   | 3836   | No  | NA    | 0  | 2  | Not-determined | Genome-fragment | NA    | 0     |
| S17-final-viral-combined_k141_263255 | [full]   | 7934   | No  | NA    | 0  | 5  | Not-determined | Genome-fragment | NA    | 0     |
| S9-final-viral-combined_k141_78884   | [full]   | 2312   | No  | NA    | 0  | 0  | Low-quality    | Genome-fragment | 2.7   | 0     |
| S1-final-viral-combined_k141_150600  | [full]   | 2312   | No  | NA    | 1  | 0  | Low-quality    | Genome-fragment | 4.79  | 0     |
| S17-final-viral-combined_k141_95700  | [full]   | 1484   | No  | NA    | 0  | 1  | Not-determined | Genome-fragment | NA    | 0     |
| S17-final-viral-combined_k141_180669 | [full]   | 2312   | No  | NA    | 0  | 0  | Low-quality    | Genome-fragment | 6.77  | 0     |
| S2-final-viral-combined_k141_109036  | [full]   | 2312   | No  | NA    | 3  | 0  | Low-quality    | Genome-fragment | 5.33  | 0     |
| S2_k141_240854                       | [full]   | 2312   | No  | NA    | 0  | 2  | Low-quality    | Genome-fragment | 1.24  | 0     |
| S17-final-viral-combined_k141_130542 | [full]   | 12455  | No  | NA    | 0  | 0  | Not-determined | Genome-fragment | NA    | 0     |
| S1-final-viral-combined_k141_344259  | [full]   | 2313   | No  | NA    | 3  | 0  | Low-quality    | Genome-fragment | 6.15  | 0     |
| S1_k141_191262                       | [full]   | 2313   | No  | NA    | 0  | 1  | Low-quality    | Genome-fragment | 3.29  | 0     |
| S17-final-viral-combined_k141_41239  | [full]   | 9330   | No  | NA    | 0  | 7  | Not-determined | Genome-fragment | NA    | 0     |
| S17-final-viral-combined_k141_95719  | [full]   | 1587   | No  | NA    | 0  | 1  | Not-determined | Genome-fragment | NA    | 0     |
| S17-final-viral-combined_k141_121376 | [full]   | 1103   | No  | NA    | 0  | 2  | Not-determined | Genome-fragment | NA    | 0     |
| S17-final-viral-combined_k141_251780 | [full]   | 1612   | No  | NA    | 0  | 1  | Not-determined | Genome-fragment | NA    | 0     |
| S17-final-viral-combined_k141_108484 | [full]   | 2724   | No  | NA    | 0  | 2  | Not-determined | Genome-fragment | NA    | 0     |
| S17-final-viral-combined_k141_187408 | [full]   | 2007   | No  | NA    | 0  | 1  | Not-determined | Genome-fragment | NA    | 0     |
| S17-final-viral-combined_k141_108496 | [full]   | 1202   | No  | NA    | 0  | 1  | Not-determined | Genome-fragment | NA    | 0     |
| S17-final-viral-combined_k141_232059 | [full]   | 2326   | No  | NA    | 0  | 2  | Not-determined | Genome-fragment | NA    | 0     |
| S17-final-viral-combined_k141_251830 | [full]   | 1587   | No  | NA    | 0  | 1  | Not-determined | Genome-fragment | NA    | 0     |
| S17-final-viral-combined_k141_251834 | [full]   | 1140   | No  | NA    | 0  | 2  | Not-determined | Genome-fragment | NA    | 0     |
| S5-final-viral-combined_k141_85629   | [full]   | 2313   | No  | NA    | 0  | 0  | Low-quality    | Genome-fragment | 2.81  | 0     |
| S17-final-viral-combined_k141_130580 | [full]   | 2086   | No  | NA    | 0  | 0  | Not-determined | Genome-fragment | NA    | 0     |
| S17-final-viral-combined_k141_121431 | [full]   | 5041   | No  | NA    | 0  | 1  | Not-determined | Genome-fragment | NA    | 0     |
| S17-final-viral-combined_k141_153238 | [full]   | 1713   | No  | NA    | 0  | 2  | Not-determined | Genome-fragment | NA    | 0     |
| S2-final-viral-combined_k141_157471  | [full]   | 2313   | No  | NA    | 1  | 0  | Low-quality    | Genome-fragment | 1.17  | 0     |
| S2-final-viral-combined_k141_200595  | [full]   | 2313   | No  | NA    | 0  | 1  | Low-quality    | Genome-fragment | 0.8   | 0     |
| S17-final-viral-combined_k141_175695 | [full]   | 1754   | No  | NA    | 0  | 0  | Not-determined | Genome-fragment | NA    | 0     |
| S17-final-viral-combined_k141_95786  | [full]   | 4424   | No  | NA    | 0  | 2  | Not-determined |                 |       |       |



|                                      |          |       |     |    |     |   |                |                 |    |      |       |
|--------------------------------------|----------|-------|-----|----|-----|---|----------------|-----------------|----|------|-------|
| S17-final-viral-combined_k141_232291 | [full]   | 1321  | No  | NA | 0   | 2 | Not-determined | Genome-fragment | NA | 0    | 0     |
| S17-final-viral-combined_k141_41160  | [full]   | 4884  | No  | NA | 0   | 4 | Not-determined | Genome-fragment | NA | 0    | 0     |
| S17-final-viral-combined_k141_64439  | [full]   | 2986  | No  | NA | 0   | 3 | Not-determined | Genome-fragment | NA | 0    | 0     |
| S17-final-viral-combined_k141_161489 | [full]   | 2006  | No  | NA | 0   | 1 | Not-determined | Genome-fragment | NA | 0    | 0     |
| S17-final-viral-combined_k141_121537 | [full]   | 6670  | No  | NA | 0   | 2 | Not-determined | Genome-fragment | NA | 0    | 0     |
| S12-final-viral-combined_k141_13798  | [full]   | 2318  | No  | NA | 0   | 2 | Low-quality    | Genome-fragment | NA | 0.77 | 0     |
| S17-final-viral-combined_k141_76292  | [full]   | 1729  | No  | NA | 0   | 1 | Not-determined | Genome-fragment | NA | 0    | 0     |
| S17-final-viral-combined_k141_142841 | [full]   | 5542  | No  | NA | 0   | 2 | Not-determined | Genome-fragment | NA | 0    | 0     |
| S12_k141_169524                      | [full]   | 2318  | No  | NA | 0   | 0 | Low-quality    | Genome-fragment | NA | 1.51 | 0     |
| S17-final-viral-combined_k141_64471  | [full]   | 1278  | No  | NA | 0   | 1 | Not-determined | Genome-fragment | NA | 0    | 0     |
| S17-final-viral-combined_k141_18692  | [full]   | 4803  | No  | NA | 0   | 3 | Not-determined | Genome-fragment | NA | 0    | 0     |
| S2-final-viral-combined_k141_24776   | [full]   | 2318  | No  | NA | 0   | 0 | Low-quality    | Genome-fragment | NA | 5.3  | 0     |
| S8-final-viral-combined_k141_212274  | [full]   | 2318  | No  | NA | 5   | 0 | Low-quality    | Genome-fragment | NA | 3.66 | 0     |
| S17-final-viral-combined_k141_142858 | [full]   | 1856  | No  | NA | 0   | 2 | Not-determined | Genome-fragment | NA | 0    | 0     |
| S17-final-viral-combined_k141_242067 | [full]   | 4101  | No  | NA | 0   | 0 | Not-determined | Genome-fragment | NA | 0    | 0     |
| S17-final-viral-combined_k141_151631 | [full]   | 2318  | No  | NA | 0   | 2 | Not-determined | Genome-fragment | NA | 0    | 0     |
| S17-final-viral-combined_k141_232360 | [full]   | 9425  | No  | NA | 0   | 6 | Not-determined | Genome-fragment | NA | 0    | 0     |
| S17-final-viral-combined_k141_18707  | [full]   | 1657  | No  | NA | 0   | 0 | Not-determined | Genome-fragment | NA | 0    | 0     |
| S17-final-viral-combined_k141_165524 | [full]   | 2092  | No  | NA | 0   | 1 | Not-determined | Genome-fragment | NA | 0    | 0     |
| S11-final-viral-combined_k141_69074  | [full]   | 2319  | No  | NA | 0   | 0 | Low-quality    | Genome-fragment | NA | 3.8  | 0     |
| S17-final-viral-combined_k141_163526 | [full]   | 3552  | No  | NA | 0   | 4 | Not-determined | Genome-fragment | NA | 1.41 | 0     |
| S2-final-viral-combined_k141_20179   | [full]   | 2319  | No  | NA | 1   | 0 | Low-quality    | Genome-fragment | NA | 5    | 0     |
| S17-final-viral-combined_k141_64524  | [full]   | 1855  | No  | NA | 0   | 2 | Not-determined | Genome-fragment | NA | 0    | 0     |
| S4-final-viral-combined_k141_146037  | [full]   | 2319  | No  | NA | 0   | 1 | Low-quality    | Genome-fragment | NA | 4.19 | 0     |
| S17-final-viral-combined_k141_87902  | [full]   | 1668  | No  | NA | 0   | 1 | Not-determined | Genome-fragment | NA | 0    | 0     |
| S11-final-viral-combined_k141_26148  | [full]   | 2320  | No  | NA | 0   | 1 | Low-quality    | Genome-fragment | NA | 0.69 | 0     |
| S17-final-viral-combined_k141_142918 | [full]   | 8963  | No  | NA | 0   | 7 | Not-determined | Genome-fragment | NA | 0    | 0     |
| S1-final-viral-combined_k141_89012   | [full]   | 2320  | No  | NA | 1   | 0 | Low-quality    | Genome-fragment | NA | 6.44 | 0     |
| S7-final-viral-combined_k141_236541  | [full]   | 2320  | No  | NA | 0   | 0 | Low-quality    | Genome-fragment | NA | 3.21 | 0     |
| S17-final-viral-combined_k141_76397  | [full]   | 2214  | No  | NA | 0   | 2 | Not-determined | Genome-fragment | NA | 0    | 0     |
| S17-final-viral-combined_k141_187601 | [full]   | 5817  | No  | NA | 0   | 3 | Not-determined | Genome-fragment | NA | 0    | 0     |
| S7-final-viral-combined_k141_86239   | [full]   | 2320  | No  | NA | 0   | 0 | Low-quality    | Genome-fragment | NA | 5.37 | 0     |
| S17-final-viral-combined_k141_51345  | [full]   | 2455  | No  | NA | 1   | 1 | Not-determined | Genome-fragment | NA | 0    | 0     |
| S17-final-viral-combined_k141_187616 | [full]   | 1477  | No  | NA | 0   | 1 | Not-determined | Genome-fragment | NA | 0    | 0     |
| S2-final-viral-combined_k141_81662   | [full]   | 2320  | No  | NA | 0   | 1 | Low-quality    | Genome-fragment | NA | 1.41 | 0     |
| S17-final-viral-combined_k141_96019  | [full]   | 1318  | No  | NA | 0   | 2 | Not-determined | Genome-fragment | NA | 0    | 0     |
| S3-final-viral-combined_k141_26190   | [full]   | 2321  | No  | NA | 0   | 0 | Low-quality    | Genome-fragment | NA | 1.63 | 0     |
| S17-final-viral-combined_k141_232394 | [full]   | 2976  | No  | NA | 0   | 2 | Not-determined | Genome-fragment | NA | 0    | 0     |
| S17-final-viral-combined_k141_179294 | [full]   | 8365  | No  | NA | 1   | 1 | High-quality   | Genome-fragment | NA | 100  | 0     |
| S17-final-viral-combined_k141_41761  | [full]   | 3818  | No  | NA | 0   | 3 | Not-determined | Genome-fragment | NA | 0    | 0     |
| S17-final-viral-combined_k141_153606 | [full]   | 1747  | No  | NA | 0   | 0 | Not-determined | Genome-fragment | NA | 0    | 0     |
| S12-final-viral-combined_k141_14188  | [full]   | 2321  | No  | NA | 0   | 0 | Low-quality    | Genome-fragment | NA | 5.77 | 0     |
| S4-final-viral-combined_k141_31446   | [full]   | 2321  | No  | NA | 0   | 0 | Low-quality    | Genome-fragment | NA | 5.75 | 0     |
| S11-final-viral-combined_k141_80393  | [full]   | 2322  | No  | NA | 1   | 0 | Low-quality    | Genome-fragment | NA | 6.71 | 0     |
| S17-final-viral-combined_k141_19889  | [full]   | 2401  | No  | NA | 0   | 1 | Not-determined | Genome-fragment | NA | 0    | 0     |
| S17-final-viral-combined_k141_20945  | [full]   | 1708  | No  | NA | 0   | 0 | Not-determined | Genome-fragment | NA | 0    | 0     |
| S1-final-viral-combined_k141_320496  | [full]   | 2322  | No  | NA | 0   | 3 | Low-quality    | Genome-fragment | NA | 1.18 | 0     |
| S1-final-viral-combined_k141_20526   | [full]   | 2322  | No  | NA | 2   | 0 | Low-quality    | Genome-fragment | NA | 4.18 | 0     |
| S5-final-viral-combined_k141_195139  | [full]   | 2322  | No  | NA | 0   | 0 | Low-quality    | Genome-fragment | NA | 0.18 | 0     |
| S17-final-viral-combined_k141_41511  | [full]   | 3037  | No  | NA | 0   | 2 | Not-determined | Genome-fragment | NA | 0    | 0     |
| S12-final-viral-combined_k141_313398 | [full]   | 2322  | No  | NA | 0   | 2 | Low-quality    | Genome-fragment | NA | 3.42 | 0     |
| S17-final-viral-combined_k141_153646 | [full]   | 4847  | No  | NA | 0   | 2 | Not-determined | Genome-fragment | NA | 0    | 0     |
| S9-final-viral-combined_k141_20912   | [full]   | 2323  | No  | NA | 0   | 1 | Low-quality    | Genome-fragment | NA | 2.18 | 0     |
| S11-final-viral-combined_k141_322696 | [full]   | 2323  | No  | NA | 0   | 3 | Low-quality    | Genome-fragment | NA | 0.92 | 0     |
| S2-final-viral-combined_k141_20168   | [full]   | 2323  | No  | NA | 2   | 0 | Low-quality    | Genome-fragment | NA | 1.76 | 0     |
| S8-final-viral-combined_k141_273141  | [full]   | 2323  | No  | NA | 1   | 0 | Low-quality    | Genome-fragment | NA | 0    | 0     |
| S17-final-viral-combined_k141_30609  | [full]   | 1126  | No  | NA | 0   | 2 | Not-determined | Genome-fragment | NA | 0    | 0     |
| S9-final-viral-combined_k141_44299   | [full]   | 2324  | No  | NA | 0   | 1 | Low-quality    | Genome-fragment | NA | 1.21 | 0     |
| S11-final-viral-combined_k141_41515  | [full]   | 2324  | No  | NA | 1   | 0 | Low-quality    | Genome-fragment | NA | 3.59 | 0     |
| S17-final-viral-combined_k141_221484 | [full]   | 3318  | No  | NA | 0   | 4 | Not-determined | Genome-fragment | NA | 0    | 0     |
| S17-final-viral-combined_k141_10839  | [full]   | 3995  | No  | NA | 0   | 2 | Not-determined | Genome-fragment | NA | 0    | 0     |
| S17-final-viral-combined_k141_88649  | [full]   | 1022  | No  | NA | 0   | 1 | Not-determined | Genome-fragment | NA | 0    | 0     |
| S7-final-viral-combined_k141_209709  | [full]   | 2324  | No  | NA | 1   | 0 | Low-quality    | Genome-fragment | NA | 4.26 | 0     |
| S17-final-viral-combined_k141_143110 | [full]   | 1095  | No  | NA | 0   | 1 | Not-determined | Genome-fragment | NA | 0    | 0     |
| S17-final-viral-combined_k141_64797  | [full]   | 5966  | No  | NA | 0   | 3 | Not-determined | Genome-fragment | NA | 0    | 0     |
| S17-final-viral-combined_k141_64812  | [full]   | 1084  | No  | NA | 0   | 0 | Not-determined | Genome-fragment | NA | 0    | 0     |
| S17-final-viral-combined_k141_131069 | [full]   | 1485  | No  | NA | 0   | 1 | Not-determined | Genome-fragment | NA | 0    | 0     |
| S12-final-viral-combined_k141_665    | [full]   | 2324  | No  | NA | 0   | 0 | Low-quality    | Genome-fragment | NA | 4.5  | 0     |
| S17-final-viral-combined_k141_18819  | [full]   | 1844  | No  | NA | 0   | 0 | Not-determined | Genome-fragment | NA | 0    | 0     |
| S12-final-viral-combined_k141_231179 | [full]   | 2324  | No  | NA | 0   | 0 | Low-quality    | Genome-fragment | NA | 5.58 | 0     |
| S17-final-viral-combined_k141_131088 | [full]   | 6170  | No  | NA | 0   | 1 | Not-determined | Genome-fragment | NA | 0    | 0     |
| S2-final-viral-combined_k141_147186  | [full]   | 2324  | No  | NA | 0   | 0 | Low-quality    | Genome-fragment | NA | 4.95 | 0     |
| S17-final-viral-combined_k141_18835  | [full]   | 10542 | No  | NA | 0   | 6 | Not-determined | Genome-fragment | NA | 0    | 0     |
| S2-final-viral-combined_k141_23974   | [full]   | 2324  | No  | NA | 1   | 0 | Low-quality    | Genome-fragment | NA | 5.05 | 0     |
| S8_k141_145341                       | [full]   | 2324  | No  | NA | 1   | 0 | Low-quality    | Genome-fragment | NA | 3.81 | 0     |
| S9_k141_104                          | [full]   | 2325  | No  | NA | 0   | 2 | Low-quality    | Genome-fragment | NA | 4.38 | 0     |
| S17-final-viral-combined_k141_176075 | [full]   | 1408  | No  | NA | 0   | 1 | Not-determined | Genome-fragment | NA | 0    | 0     |
| S2_k141_24629                        | [full]   | 2325  | No  | NA | 0   | 0 | Low-quality    | Genome-fragment | NA | 2.42 | 0     |
| S17-final-viral-combined_k141_121843 | [full]   | 1014  | No  | NA | 0   | 1 | Not-determined | Genome-fragment | NA | 0    | 0     |
| S12-final-viral-combined_k141_128796 | [full]   | 2326  | No  | NA | 0   | 0 | Low-quality    | Genome-fragment | NA | 3.52 | 0     |
| S17-final-viral-combined_k141_163784 | [full]   | 2894  | No  | NA | 0   | 0 | Not-determined | Genome-fragment | NA | 0    | 0     |
| S17-final-viral-combined_k141_198930 | [full]   | 3468  | No  | NA | 0   | 2 | Not-determined | Genome-fragment | NA | 0    | 0     |
| S12-final-viral-combined_k141_374386 | [H2gene] | 2326  | No  | NA | 1   | 0 | Low-quality    | Genome-fragment | NA | 5.14 | 0     |
| S12-final-viral-combined_k141_199036 | [full]   | 2258  | No  | NA | 0   | 0 | Not-determined | Genome-fragment | NA | 0    | 0     |
| S2-final-viral-combined_k141_50701   | [full]   | 2326  | No  | NA | 1   | 1 | Low-quality    | Genome-fragment | NA | 3.41 | 35.08 |
| S17-final-viral-combined_k141_210112 | [full]   | 2065  | No  | NA | 0   | 3 | Not-determined | Genome-fragment | NA | 0    | 0     |
| S17-final-viral-combined_k141_96150  | [full]   | 4473  | No  | NA | 0   | 3 | Not-determined | Genome-fragment | NA | 0    | 0     |
| S17-final-viral-combined_k141_21026  | [full]   | 4445  | No  | NA | 0   | 5 | Not-determined | Genome-fragment | NA | 0    | 0     |
| S17-final-viral-combined_k141_64670  | [full]   | 2079  | No  | NA | 0   | 2 | Not-determined | Genome-fragment | NA | 0    | 0     |
| S17-final-viral-combined_k141_143206 | [full]   | 1227  | No  | NA | 0   | 0 | Not-determined | Genome-fragment | NA | 0    | 0     |
| S17-final-viral-combined_k141_210155 | [full]   | 2568  | No  | NA | 0   | 3 | Not-determined | Genome-fragment | NA | 0    | 0     |
| S17-final-viral-combined_k141_242341 | [full]   | 1744  | No  | NA | 0   | 0 | Not-determined | Genome-fragment | NA | 0    | 0     |
| S17-final-viral-combined_k141_88217  | [full]   | 1582  | No  | NA | 0   | 1 | Not-determined | Genome-fragment | NA | 0    | 0     |
| S17-final-viral-combined_k141_252168 | [full]   | 1605  | No  | NA | 0   | 1 | Not-determined | Genome-fragment | NA | 0    | 0     |
| S2_k141_134475                       | [full]   | 2326  | No  | NA | 2   | 0 | Low-quality    | Genome-fragment | NA | 5.73 | 0     |
| S8-final-viral-combined_k141_219792  | [full]   | 2326  | No  | NA | 0   | 2 | Low-quality    | Genome-fragment | NA | 2.28 | 0     |
| S17-final-viral-combined_k141_242362 | [full]   | 1283  | No  | NA | 0   | 2 | Not-determined | Genome-fragment | NA | 0    | 0     |
| S11-final-viral-combined_k141_65248  | [H2gene] | 2327  | Yes | NA | 1   | 1 | Low-quality    | Genome-fragment | NA | 0.71 | 55.65 |
| S17-final-viral-combined_k141_231684 | [full]   | 2758  | No  | NA | 0   | 1 | Not-determined | Genome-fragment | NA | 0    | 0     |
| S17-final-viral-combined_k141_88241  | [full]   | 2682  | No  | NA | 0   | 0 | Not-determined | Genome-fragment | NA | 0    | 0     |
| S17-final-viral-combined_k141_41735  | [full]   | 1471  | No  | NA | 0   | 1 | Not-determined | Genome-fragment | NA | 0    | 0     |
| S17-k141_110629                      | [full]   | 2327  | No  | NA | 0   | 0 | Low-quality    | Genome-fragment | NA | 4.68 | 0     |
| S17-final-viral-combined_k141_263710 | [full]   | 2066  | No  | NA | 0   | 0 | Not-determined | Genome-fragment | NA | 0    | 0     |
| S17-final-viral-combined_k141_221700 | [full]   | 2606  | No  | NA | 0   | 2 | Not-determined | Genome-fragment | NA | 0    | 0     |
| S12-final-viral-combined_k141_10762  | [full]   | 2327  | No  | NA | 0   | 0 | Low-quality    | Genome-fragment | NA | 4.25 | 0     |
| S11-final-viral-combined_k141_189030 | [full]   | 2328  | No  | NA | 0   | 2 | Low-quality    | Genome-fragment | NA | 1.12 | 0     |
| S17-final-viral-combined_k141_232703 | [full]   | 1710  | No  | NA | 0   | 1 | Not-determined | Genome-fragment | NA | 0    | 0     |
| S17-final-viral-combined_k141_187909 | [full]   | 2469  | No  | NA | 0   | 0 | Not-determined | Genome-fragment | NA | 0    | 0     |
| S17-final-viral-combined_k141_41168  | [full]   | 1683  | No  | NA | 0   | 0 | Not-determined | Genome-fragment | NA | 0    | 0     |
| S17-final-viral-combined_k141_143272 | [full]   | 1632  | No  | NA | 0   | 1 | Not-determined | Genome-fragment | NA | 0    | 0     |
| S11_k141_281688                      | [full]   | 2328  | No  | NA | 0   | 0 | Low-quality    | Genome-fragment | NA | 1.77 | 0     |
| S2_k141_190264                       | [full]   | 2328  | No  | NA | 0   | 0 | Low-quality    | Genome-fragment | NA | 0.96 | 0     |
| S17-final-viral-combined_k141_232740 | [full]   | 4265  | No  | NA | 0   | 4 | Not-determined | Genome-fragment | NA | 0    | 0     |
| S2_k141_60225                        | [full]   | 2328  | No  | NA | 0   | 1 | Low-quality    | Genome-fragment | NA | 3.53 | 0     |
| S17-final-viral-combined_k141_76773  | [full]   | 1773  | No  | NA | 0   | 2 | Not-determined | Genome-fragment | NA | 0    | 0     |
| S17-final-viral-combined_k141_153950 | [full]   | 1695  | No  | NA | 0   | 1 | Not-determined | Genome-fragment | NA | 0    | 0     |
| S17-final-viral-combined_k141_163925 | [full]   | 1698  | No  | NA | 0   | 2 | Not-determined | Genome-fragment | NA | 0    | 0     |
| S17-final-viral-combined_k141_19803  | [full]   | 1750  | No  | NA | 0   | 1 | Not-determined | Genome-fragment | NA | 0    | 0     |
| S1-final-viral-combined_k141_319466  | [full]   | 2329  | No  | NA | 1   | 0 | Low-quality    | Genome-fragment | NA | 3.91 | 0     |
| S17-final-viral-combined_k141_96261  | [full]   | 1688  | No  | NA | 0   | 1 | Not-determined | Genome-fragment | NA | 0    | 0     |
| S17-final-viral-combined_k141_76790  | [full]   | 1450  | No  | NA | 0   | 0 | Not-determined | Genome-fragment | NA | 0    | 0     |
| S17-final-viral-combined_k141_19923  | [full]   | 5010  | No  | NA | 0</ |   |                |                 |    |      |       |



|                                       |          |      |    |    |    |   |                |                 |    |       |   |
|---------------------------------------|----------|------|----|----|----|---|----------------|-----------------|----|-------|---|
| S17-final-viral-combined_k141_2303031 | [Full]   | 1415 | No | NA | 0  | 0 | Not-determined | Genome-fragment | NA |       | 0 |
| S4-final-viral-combined_k141_154051   | [Full]   | 2333 | No | NA | 0  | 0 | Low-quality    | Genome-fragment | NA | 6.21  | 0 |
| S17-final-viral-combined_k141_154207  | [Full]   | 1291 | No | NA | 0  | 0 | Not-determined | Genome-fragment | NA |       | 0 |
| S17-final-viral-combined_k141_87911   | [Full]   | 2292 | No | NA | 0  | 2 | Not-determined | Genome-fragment | NA |       | 0 |
| S17-final-viral-combined_k141_31036   | [Full]   | 1512 | No | NA | 0  | 0 | Not-determined | Genome-fragment | NA |       | 0 |
| S17-final-viral-combined_k141_131444  | [Full]   | 3802 | No | NA | 0  | 1 | Not-determined | Genome-fragment | NA |       | 0 |
| S17-final-viral-combined_k141_231990  | [Full]   | 1654 | No | NA | 0  | 0 | Not-determined | Genome-fragment | NA |       | 0 |
| S4-final-viral-combined_k141_29833    | [Full]   | 2333 | No | NA | 0  | 0 | Low-quality    | Genome-fragment | NA | 1.54  | 0 |
| S17-final-viral-combined_k141_8795    | [Full]   | 1241 | No | NA | 0  | 0 | Not-determined | Genome-fragment | NA |       | 0 |
| S17-final-viral-combined_k141_88574   | [Full]   | 4500 | No | NA | 0  | 1 | Not-determined | Genome-fragment | NA |       | 0 |
| S3_k141_59314                         |          | 2334 | No | NA | 0  | 0 | Low-quality    | Genome-fragment | NA | 0.62  | 0 |
| S7-final-viral-combined_k141_64524    | [Full]   | 2334 | No | NA | 1  | 0 | Low-quality    | Genome-fragment | NA | 4.94  | 0 |
| S7_k141_114612                        |          | 2334 | No | NA | 0  | 0 | Low-quality    | Genome-fragment | NA | 1.53  | 0 |
| S17-final-viral-combined_k141_176498  | [Full]   | 1401 | No | NA | 0  | 1 | Not-determined | Genome-fragment | NA |       | 0 |
| S17-final-viral-combined_k141_76988   | [Full]   | 2462 | No | NA | 0  | 3 | Not-determined | Genome-fragment | NA |       | 0 |
| S17-final-viral-combined_k141_109310  | [Full]   | 2907 | No | NA | 0  | 3 | Not-determined | Genome-fragment | NA |       | 0 |
| S17-final-viral-combined_k141_233033  | [Full]   | 3872 | No | NA | 0  | 2 | Not-determined | Genome-fragment | NA |       | 0 |
| S17-final-viral-combined_k141_37775   | [Full]   | 2334 | No | NA | 0  | 1 | Low-quality    | Genome-fragment | NA | 4.52  | 0 |
| S17-final-viral-combined_k141_252454  | [Full]   | 1405 | No | NA | 0  | 2 | Not-determined | Genome-fragment | NA |       | 0 |
| S6-final-viral-combined_k141_11013    | [Full]   | 2334 | No | NA | 0  | 0 | Low-quality    | Genome-fragment | NA | 0.74  | 0 |
| S17-final-viral-combined_k141_109319  | [Full]   | 2282 | No | NA | 0  | 4 | Not-determined | Genome-fragment | NA |       | 0 |
| S17-final-viral-combined_k141_199440  | [Full]   | 2757 | No | NA | 10 | 1 | Medium-quality | Genome-fragment | NA | 61.84 | 0 |
| S9-final-viral-combined_k141_76387    | [Full]   | 2335 | No | NA | 0  | 0 | Low-quality    | Genome-fragment | NA | 3.06  | 0 |
| S11-final-viral-combined_k141_23173   | [Full]   | 2335 | No | NA | 0  | 2 | Low-quality    | Genome-fragment | NA | 1.09  | 0 |
| S17-final-viral-combined_k141_8847    | [Full]   | 1416 | No | NA | 0  | 2 | Not-determined | Genome-fragment | NA |       | 0 |
| S17-final-viral-combined_k141_121164  | [Full]   | 2623 | No | NA | 0  | 1 | Not-determined | Genome-fragment | NA |       | 0 |
| S17-final-viral-combined_k141_210567  | [Full]   | 1185 | No | NA | 0  | 1 | Not-determined | Genome-fragment | NA |       | 0 |
| S14-final-viral-combined_k141_7636    | [Full]   | 2335 | No | NA | 0  | 2 | Low-quality    | Genome-fragment | NA | 2.82  | 0 |
| S17-final-viral-combined_k141_143636  | [Full]   | 1210 | No | NA | 0  | 0 | Not-determined | Genome-fragment | NA |       | 0 |
| S17-final-viral-combined_k141_222067  | [Full]   | 5764 | No | NA | 0  | 3 | Not-determined | Genome-fragment | NA |       | 0 |
| S17-final-viral-combined_k141_42079   | [Full]   | 1785 | No | NA | 0  | 2 | Not-determined | Genome-fragment | NA |       | 0 |
| S17-final-viral-combined_k141_2087    | [Full]   | 2087 | No | NA | 0  | 0 | Not-determined | Genome-fragment | NA |       | 0 |
| S17-final-viral-combined_k141_164220  | [Full]   | 1172 | No | NA | 0  | 1 | Not-determined | Genome-fragment | NA |       | 0 |
| S17-final-viral-combined_k141_88670   | [Full]   | 3834 | No | NA | 0  | 2 | Not-determined | Genome-fragment | NA |       | 0 |
| S17-final-viral-combined_k141_210606  | [Full]   | 1226 | No | NA | 0  | 3 | Not-determined | Genome-fragment | NA |       | 0 |
| S17-final-viral-combined_k141_221077  | [Full]   | 8212 | No | NA | 0  | 6 | Not-determined | Genome-fragment | NA |       | 0 |
| S17-final-viral-combined_k141_252537  | [Full]   | 1928 | No | NA | 0  | 0 | Not-determined | Genome-fragment | NA |       | 0 |
| S17-final-viral-combined_k141_109394  | [Full]   | 1202 | No | NA | 0  | 1 | Not-determined | Genome-fragment | NA |       | 0 |
| S17-final-viral-combined_k141_131538  | [Full]   | 3441 | No | NA | 0  | 2 | Not-determined | Genome-fragment | NA |       | 0 |
| S17-final-viral-combined_k141_188299  | [Full]   | 3003 | No | NA | 0  | 1 | Not-determined | Genome-fragment | NA |       | 0 |
| S17-final-viral-combined_k141_154356  | [Full]   | 3197 | No | NA | 0  | 2 | Not-determined | Genome-fragment | NA |       | 0 |
| S17-final-viral-combined_k141_88786   | [Full]   | 1405 | No | NA | 0  | 1 | Not-determined | Genome-fragment | NA |       | 0 |
| S7-final-viral-combined_k141_59331    | [Full]   | 2335 | No | NA | 1  | 0 | Low-quality    | Genome-fragment | NA | 3.09  | 0 |
| S12-final-viral-combined_k141_282058  | [Full]   | 2335 | No | NA | 0  | 2 | Low-quality    | Genome-fragment | NA | 1.12  | 0 |
| S12-final-viral-combined_k141_350666  | [Full]   | 2335 | No | NA | 1  | 0 | Low-quality    | Genome-fragment | NA | 1.43  | 0 |
| S2-final-viral-combined_k141_108078   | [Full]   | 2335 | No | NA | 0  | 0 | Low-quality    | Genome-fragment | NA | 1.42  | 0 |
| S17-final-viral-combined_k141_188330  | [Full]   | 1120 | No | NA | 0  | 0 | Not-determined | Genome-fragment | NA |       | 0 |
| S17-final-viral-combined_k141_199532  | [Full]   | 1998 | No | NA | 0  | 3 | Not-determined | Genome-fragment | NA |       | 0 |
| S17-final-viral-combined_k141_77051   | [Full]   | 2943 | No | NA | 0  | 2 | Not-determined | Genome-fragment | NA |       | 0 |
| S2-final-viral-combined_k141_24712    | [Full]   | 2335 | No | NA | 1  | 0 | Low-quality    | Genome-fragment | NA | 3.67  | 0 |
| S17-final-viral-combined_k141_147563  | [Full]   | 2336 | No | NA | 0  | 1 | Low-quality    | Genome-fragment | NA | 5.36  | 0 |
| S17-final-viral-combined_k141_210739  | [Full]   | 1078 | No | NA | 0  | 2 | Not-determined | Genome-fragment | NA |       | 0 |
| S17-final-viral-combined_k141_149913  | [Full]   | 2336 | No | NA | 1  | 0 | Low-quality    | Genome-fragment | NA | 3.62  | 0 |
| S17-final-viral-combined_k141_154398  | [Full]   | 6818 | No | NA | 0  | 5 | Not-determined | Genome-fragment | NA |       | 0 |
| S17-final-viral-combined_k141_51778   | [Full]   | 1708 | No | NA | 0  | 1 | Not-determined | Genome-fragment | NA |       | 0 |
| S12-final-viral-combined_k141_77145   | [Full]   | 2336 | No | NA | 0  | 0 | Low-quality    | Genome-fragment | NA | 3.53  | 0 |
| S11-final-viral-combined_k141_97828   | [Full]   | 2337 | No | NA | 0  | 2 | Low-quality    | Genome-fragment | NA | 1.06  | 0 |
| S17-final-viral-combined_k141_252592  | [Full]   | 1573 | No | NA | 0  | 1 | Not-determined | Genome-fragment | NA |       | 0 |
| S17-final-viral-combined_k141_176691  | [Full]   | 1159 | No | NA | 0  | 1 | Not-determined | Genome-fragment | NA |       | 0 |
| S17-final-viral-combined_k141_19336   | [Full]   | 1291 | No | NA | 0  | 2 | Not-determined | Genome-fragment | NA |       | 0 |
| S7-final-viral-combined_k141_211846   | [R2gene] | 2337 | No | NA | 2  | 0 | Low-quality    | Genome-fragment | NA | 3.28  | 0 |
| S17-final-viral-combined_k141_131593  | [Full]   | 1815 | No | NA | 0  | 0 | Not-determined | Genome-fragment | NA |       | 0 |
| S17-final-viral-combined_k141_176695  | [Full]   | 3112 | No | NA | 0  | 0 | Not-determined | Genome-fragment | NA |       | 0 |
| S12-final-viral-combined_k141_48035   | [R2gene] | 2337 | No | NA | 1  | 0 | Low-quality    | Genome-fragment | NA | 2.27  | 0 |
| S4_k141_20972                         |          | 2337 | No | NA | 2  | 2 | Low-quality    | Genome-fragment | NA | 1.53  | 0 |
| S17-final-viral-combined_k141_233228  | [Full]   | 4368 | No | NA | 0  | 2 | Not-determined | Genome-fragment | NA |       | 0 |
| S17-final-viral-combined_k141_143779  | [Full]   | 6695 | No | NA | 0  | 3 | Not-determined | Genome-fragment | NA |       | 0 |
| S17-final-viral-combined_k141_222197  | [Full]   | 2010 | No | NA | 0  | 0 | Not-determined | Genome-fragment | NA |       | 0 |
| S14-final-viral-combined_k141_255946  | [Full]   | 2338 | No | NA | 0  | 0 | Low-quality    | Genome-fragment | NA | 3.14  | 0 |
| S17-final-viral-combined_k141_199615  | [Full]   | 3347 | No | NA | 0  | 1 | Not-determined | Genome-fragment | NA |       | 0 |
| S17-final-viral-combined_k141_91191   | [Full]   | 1327 | No | NA | 0  | 2 | Not-determined | Genome-fragment | NA |       | 0 |
| S17-final-viral-combined_k141_131631  | [Full]   | 1310 | No | NA | 0  | 2 | Not-determined | Genome-fragment | NA |       | 0 |
| S12-final-viral-combined_k141_42924   | [Full]   | 2338 | No | NA | 0  | 2 | Low-quality    | Genome-fragment | NA | 0.4   | 0 |
| S11-final-viral-combined_k141_211685  | [Full]   | 2339 | No | NA | 0  | 3 | Low-quality    | Genome-fragment | NA | 1.06  | 0 |
| S17-final-viral-combined_k141_242721  | [Full]   | 3952 | No | NA | 0  | 1 | Not-determined | Genome-fragment | NA |       | 0 |
| S17-final-viral-combined_k141_154496  | [Full]   | 2507 | No | NA | 0  | 1 | Not-determined | Genome-fragment | NA |       | 0 |
| S17-final-viral-combined_k141_154499  | [Full]   | 3076 | No | NA | 0  | 1 | Not-determined | Genome-fragment | NA |       | 0 |
| S17-final-viral-combined_k141_264129  | [Full]   | 2176 | No | NA | 0  | 2 | Not-determined | Genome-fragment | NA |       | 0 |
| S17-final-viral-combined_k141_231398  | [Full]   | 2773 | No | NA | 0  | 3 | Not-determined | Genome-fragment | NA |       | 0 |
| S11-final-viral-combined_k141_295029  | [Full]   | 2339 | No | NA | 0  | 0 | Low-quality    | Genome-fragment | NA | 4.99  | 0 |
| S17-final-viral-combined_k141_122121  | [Full]   | 5250 | No | NA | 0  | 3 | Not-determined | Genome-fragment | NA |       | 0 |
| S17-final-viral-combined_k141_271721  | [Full]   | 2339 | No | NA | 0  | 0 | Low-quality    | Genome-fragment | NA | 5.44  | 0 |
| S17-final-viral-combined_k141_164346  | [Full]   | 1547 | No | NA | 0  | 1 | Not-determined | Genome-fragment | NA |       | 0 |
| S12-final-viral-combined_k141_251591  | [Full]   | 2339 | No | NA | 1  | 0 | Low-quality    | Genome-fragment | NA | 6.14  | 0 |
| S12_k141_286734                       |          | 2339 | No | NA | 0  | 1 | Low-quality    | Genome-fragment | NA | 4.71  | 0 |
| S17-final-viral-combined_k141_176816  | [Full]   | 2434 | No | NA | 0  | 3 | Not-determined | Genome-fragment | NA |       | 0 |
| S17-final-viral-combined_k141_133757  | [Full]   | 1537 | No | NA | 0  | 2 | Not-determined | Genome-fragment | NA |       | 0 |
| S4-final-viral-combined_k141_391453   | [Full]   | 2340 | No | NA | 3  | 0 | Low-quality    | Genome-fragment | NA | 5.03  | 0 |
| S1_k141_388250                        |          | 2340 | No | NA | 0  | 0 | Low-quality    | Genome-fragment | NA | 3.38  | 0 |
| S17-final-viral-combined_k141_65520   | [Full]   | 1508 | No | NA | 0  | 0 | Not-determined | Genome-fragment | NA |       | 0 |
| S3-final-viral-combined_k141_30083    | [Full]   | 2340 | No | NA | 2  | 0 | Low-quality    | Genome-fragment | NA | 6.05  | 0 |
| S17-final-viral-combined_k141_131750  | [Full]   | 3348 | No | NA | 0  | 2 | Not-determined | Genome-fragment | NA |       | 0 |
| S17-final-viral-combined_k141_65528   | [Full]   | 1288 | No | NA | 0  | 0 | Not-determined | Genome-fragment | NA |       | 0 |
| S7-final-viral-combined_k141_35819    | [Full]   | 2340 | No | NA | 0  | 2 | Low-quality    | Genome-fragment | NA | 1.16  | 0 |
| S17-final-viral-combined_k141_154651  | [Full]   | 1088 | No | NA | 0  | 0 | Not-determined | Genome-fragment | NA |       | 0 |
| S17-final-viral-combined_k141_222249  | [Full]   | 3962 | No | NA | 0  | 0 | Not-determined | Genome-fragment | NA |       | 0 |
| S17-final-viral-combined_k141_31301   | [Full]   | 2328 | No | NA | 0  | 2 | Not-determined | Genome-fragment | NA |       | 0 |
| S17-final-viral-combined_k141_222255  | [Full]   | 1079 | No | NA | 0  | 1 | Not-determined | Genome-fragment | NA |       | 0 |
| S2-final-viral-combined_k141_170866   | [Full]   | 2340 | No | NA | 0  | 1 | Low-quality    | Genome-fragment | NA | 6.48  | 0 |
| S17-final-viral-combined_k141_242828  | [Full]   | 3582 | No | NA | 0  | 3 | Not-determined | Genome-fragment | NA |       | 0 |
| S11-final-viral-combined_k141_324248  | [Full]   | 2341 | No | NA | 5  | 0 | Low-quality    | Genome-fragment | NA | 4.81  | 0 |
| S17-final-viral-combined_k141_92101   | [Full]   | 3311 | No | NA | 0  | 0 | Not-determined | Genome-fragment | NA |       | 0 |
| S17-final-viral-combined_k141_51901   | [Full]   | 1226 | No | NA | 0  | 2 | Not-determined | Genome-fragment | NA |       | 0 |
| S17-final-viral-combined_k141_42153   | [Full]   | 2807 | No | NA | 0  | 0 | Not-determined | Genome-fragment | NA |       | 0 |
| S17-final-viral-combined_k141_19487   | [Full]   | 1402 | No | NA | 0  | 0 | Not-determined | Genome-fragment | NA |       | 0 |
| S17-final-viral-combined_k141_65603   | [Full]   | 2966 | No | NA | 0  | 2 | Not-determined | Genome-fragment | NA |       | 0 |
| S3-final-viral-combined_k141_38003    | [Full]   | 2341 | No | NA | 0  | 2 | Low-quality    | Genome-fragment | NA | 4.42  | 0 |
| S17-final-viral-combined_k141_131836  | [Full]   | 3520 | No | NA | 0  | 3 | Not-determined | Genome-fragment | NA |       | 0 |
| S7-final-viral-combined_k141_112490   | [Full]   | 2341 | No | NA | 0  | 0 | Low-quality    | Genome-fragment | NA | 2.19  | 0 |
| S17-final-viral-combined_k141_213570  | [Full]   | 2341 | No | NA | 0  | 1 | Low-quality    | Genome-fragment | NA | 1.03  | 0 |
| S17-final-viral-combined_k141_19515   | [Full]   | 1378 | No | NA | 0  | 0 | Not-determined | Genome-fragment | NA |       | 0 |
| S17-final-viral-combined_k141_109700  | [Full]   | 1801 | No | NA | 0  | 1 | Not-determined | Genome-fragment | NA |       | 0 |
| S17-final-viral-combined_k141_143904  | [Full]   | 5224 | No | NA | 0  | 6 | Not-determined | Genome-fragment | NA |       | 0 |
| S17-final-viral-combined_k141_188486  | [Full]   | 3483 | No | NA | 0  | 1 | Not-determined | Genome-fragment | NA |       | 0 |
| S8-final-viral-combined_k141_95267    | [Full]   | 2341 | No | NA | 0  | 1 | Low-quality    | Genome-fragment | NA | 1.63  | 0 |
| S17-final-viral-combined_k141_242885  | [Full]   | 1244 | No | NA | 0  | 1 | Not-determined | Genome-fragment | NA |       | 0 |
| S9-final-viral-combined_k141_62601    | [Full]   | 2342 | No | NA | 2  | 0 | Low-quality    | Genome-fragment | NA | 5.54  | 0 |
| S17-final-viral-combined_k141_264251  | [Full]   | 1024 | No | NA | 0  | 0 | Not-determined | Genome-fragment | NA |       | 0 |
| S17-final-viral-combined_k141_159597  | [Full]   | 1155 | No | NA | 0  | 0 | Not-determined | Genome-fragment | NA |       | 0 |
| S3_k141_51167                         |          | 2342 | No | NA | 0  | 0 | Low-quality    | Genome-fragment | NA | 2.22  | 0 |
| S17-final-viral-combined_k141_96837   | [Full]   | 1037 | No | NA | 0  | 0 | Not-determined | Genome-fragment | NA |       | 0 |
| S17-final-viral-combined_k141_241200  | [Full]   | 2828 | No | NA | 0  | 3 | Not-determined | Genome-fragment | NA |       | 0 |
| S7-final-viral-combined_k141_400      | [Full]   | 2342 | No | NA | 0  | 0 | Low-quality    | Genome-fragment | NA | 4.91  | 0 |



|                                       |          |       |    |    |    |   |                |                 |    |       |   |
|---------------------------------------|----------|-------|----|----|----|---|----------------|-----------------|----|-------|---|
| S17-final-viral-combined_k141_317181  | [full]   | 2993  | No | NA | 0  | 3 | Not-determined | Genome-fragment | NA | 0     | 0 |
| S17-final-viral-combined_k141_427181  | [full]   | 1678  | No | NA | 0  | 2 | Not-determined | Genome-fragment | NA | 0     | 0 |
| S17-final-viral-combined_k141_317271  | [full]   | 1182  | No | NA | 0  | 1 | Not-determined | Genome-fragment | NA | 0     | 0 |
| S17-final-viral-combined_k141_1648401 | [full]   | 1508  | No | NA | 0  | 1 | Not-determined | Genome-fragment | NA | 0     | 0 |
| S4-final-viral-combined_k141_20241    | [full]   | 2347  | No | NA | 0  | 0 | Low-quality    | Genome-fragment | NA | 5.34  | 0 |
| S17-final-viral-combined_k141_1989241 | [full]   | 2184  | No | NA | 0  | 1 | Not-determined | Genome-fragment | NA | 0     | 0 |
| S17-final-viral-combined_k141_2431101 | [full]   | 1218  | No | NA | 0  | 1 | Not-determined | Genome-fragment | NA | 0     | 0 |
| S17-final-viral-combined_k141_2530441 | [full]   | 7763  | No | NA | 0  | 3 | Not-determined | Genome-fragment | NA | 0     | 0 |
| S17-final-viral-combined_k141_243111  | [full]   | 2744  | No | NA | 0  | 1 | Not-determined | Genome-fragment | NA | 0     | 0 |
| S17-final-viral-combined_k141_776871  | [full]   | 3152  | No | NA | 0  | 2 | Not-determined | Genome-fragment | NA | 0     | 0 |
| S11-final-viral-combined_k141_2351521 | [full]   | 2348  | No | NA | 0  | 0 | Low-quality    | Genome-fragment | NA | 4.05  | 0 |
| S1-final-viral-combined_k141_82421    | [full]   | 2348  | No | NA | 0  | 0 | Low-quality    | Genome-fragment | NA | 7.01  | 0 |
| S17-final-viral-combined_k141_1323081 | [full]   | 1439  | No | NA | 0  | 2 | Not-determined | Genome-fragment | NA | 0     | 0 |
| S17-final-viral-combined_k141_1999591 | [full]   | 2594  | No | NA | 0  | 0 | Not-determined | Genome-fragment | NA | 0     | 0 |
| S12-final-viral-combined_k141_458751  | [H2gene] | 2348  | No | NA | 1  | 0 | Low-quality    | Genome-fragment | NA | 5.36  | 0 |
| S7_k141_238889                        |          | 2349  | No | NA | 0  | 2 | Not-determined | Genome-fragment | NA | 0.75  | 0 |
| S17-final-viral-combined_k141_1323311 | [full]   | 1297  | No | NA | 0  | 2 | Not-determined | Genome-fragment | NA | 0     | 0 |
| S17-final-viral-combined_k141_166871  | [full]   | 7194  | No | NA | 0  | 1 | Not-determined | Genome-fragment | NA | 0     | 0 |
| S17-final-viral-combined_k141_1549541 | [full]   | 2809  | No | NA | 0  | 2 | Not-determined | Genome-fragment | NA | 0     | 0 |
| S17-final-viral-combined_k141_258901  | [full]   | 2349  | No | NA | 0  | 3 | Low-quality    | Genome-fragment | NA | 2.21  | 0 |
| S17-final-viral-combined_k141_2645201 | [full]   | 1794  | No | NA | 0  | 0 | Not-determined | Genome-fragment | NA | 2.09  | 0 |
| S2-final-viral-combined_k141_1455341  | [H2gene] | 2349  | No | NA | 1  | 0 | Low-quality    | Genome-fragment | NA | 0     | 0 |
| S17-final-viral-combined_k141_1773811 | [full]   | 3998  | No | NA | 0  | 1 | Not-determined | Genome-fragment | NA | 0     | 0 |
| S8-final-viral-combined_k141_1062801  | [full]   | 2349  | No | NA | 0  | 0 | Low-quality    | Genome-fragment | NA | 4.71  | 0 |
| S17-final-viral-combined_k141_161231  | [full]   | 22947 | No | NA | 21 | 0 | Medium-quality | Genome-fragment | NA | 52.87 | 0 |
| S11-final-viral-combined_k141_1757401 | [full]   | 2350  | No | NA | 0  | 0 | Low-quality    | Genome-fragment | NA | 4.27  | 0 |
| S17-final-viral-combined_k141_2432151 | [full]   | 2418  | No | NA | 0  | 0 | Not-determined | Genome-fragment | NA | 0     | 0 |
| S17-final-viral-combined_k141_198141  | [full]   | 1055  | No | NA | 0  | 0 | Not-determined | Genome-fragment | NA | 0     | 0 |
| S17-final-viral-combined_k141_1100081 | [full]   | 1117  | No | NA | 0  | 0 | Not-determined | Genome-fragment | NA | 0     | 0 |
| S3-final-viral-combined_k141_198961   | [full]   | 2350  | No | NA | 0  | 2 | Low-quality    | Genome-fragment | NA | 0.56  | 0 |
| S7-final-viral-combined_k141_2119421  | [full]   | 2350  | No | NA | 0  | 3 | Low-quality    | Genome-fragment | NA | 0.8   | 0 |
| S17-final-viral-combined_k141_177441  | [full]   | 2583  | No | NA | 0  | 0 | Not-determined | Genome-fragment | NA | 4.11  | 0 |
| S12-final-viral-combined_k141_3719141 | [full]   | 2350  | No | NA | 0  | 3 | Low-quality    | Genome-fragment | NA | 3.19  | 0 |
| S17-final-viral-combined_k141_2511631 | [full]   | 2539  | No | NA | 0  | 1 | Not-determined | Genome-fragment | NA | 0     | 0 |
| S17-final-viral-combined_k141_198511  | [full]   | 2513  | No | NA | 0  | 0 | Not-determined | Genome-fragment | NA | 0     | 0 |
| S17-final-viral-combined_k141_4292001 | [full]   | 1854  | No | NA | 0  | 0 | Not-determined | Genome-fragment | NA | 0     | 0 |
| S17-final-viral-combined_k141_2511911 | [full]   | 2478  | No | NA | 0  | 1 | Not-determined | Genome-fragment | NA | 0     | 0 |
| S2-final-viral-combined_k141_1759211  | [full]   | 2350  | No | NA | 0  | 1 | Low-quality    | Genome-fragment | NA | 3.39  | 0 |
| S17-final-viral-combined_k141_429231  | [full]   | 1653  | No | NA | 0  | 0 | Not-determined | Genome-fragment | NA | 0     | 0 |
| S17-final-viral-combined_k141_318601  | [full]   | 2534  | No | NA | 0  | 2 | Not-determined | Genome-fragment | NA | 0     | 0 |
| S8-final-viral-combined_k141_168931   | [full]   | 2350  | No | NA | 1  | 0 | Low-quality    | Genome-fragment | NA | 4.97  | 0 |
| S9-final-viral-combined_k141_1753391  | [full]   | 2351  | No | NA | 0  | 0 | Low-quality    | Genome-fragment | NA | 4.11  | 0 |
| S11-final-viral-combined_k141_3284541 | [full]   | 2351  | No | NA | 0  | 0 | Low-quality    | Genome-fragment | NA | 0.69  | 0 |
| S11-final-viral-combined_k141_1610051 | [full]   | 2351  | No | NA | 0  | 2 | Low-quality    | Genome-fragment | NA | 0.63  | 0 |
| S7-final-viral-combined_k141_1945111  | [full]   | 2351  | No | NA | 2  | 0 | Low-quality    | Genome-fragment | NA | 5.11  | 0 |
| S17-final-viral-combined_k141_1101331 | [full]   | 1159  | No | NA | 0  | 1 | Not-determined | Genome-fragment | NA | 0     | 0 |
| S7-final-viral-combined_k141_2140661  | [full]   | 2351  | No | NA | 0  | 1 | Low-quality    | Genome-fragment | NA | 0.43  | 0 |
| S17-final-viral-combined_k141_1604251 | [full]   | 2351  | No | NA | 0  | 1 | Low-quality    | Genome-fragment | NA | 4.67  | 0 |
| S17-final-viral-combined_k141_264641  | [full]   | 197   | No | NA | 0  | 3 | Not-determined | Genome-fragment | NA | 0     | 0 |
| S17-final-viral-combined_k141_973641  | [full]   | 3541  | No | NA | 0  | 0 | Not-determined | Genome-fragment | NA | 0     | 0 |
| S2-final-viral-combined_k141_1176521  | [full]   | 2351  | No | NA | 1  | 0 | Low-quality    | Genome-fragment | NA | 0.43  | 0 |
| S17-final-viral-combined_k141_199791  | [full]   | 1809  | No | NA | 0  | 0 | Not-determined | Genome-fragment | NA | 0     | 0 |
| S4-final-viral-combined_k141_686181   | [full]   | 2351  | No | NA | 1  | 0 | Low-quality    | Genome-fragment | NA | 5.96  | 0 |
| S17-final-viral-combined_k141_430281  | [full]   | 2641  | No | NA | 0  | 0 | Not-determined | Genome-fragment | NA | 0     | 0 |
| S17-final-viral-combined_k141_974101  | [full]   | 1551  | No | NA | 0  | 1 | Not-determined | Genome-fragment | NA | 0     | 0 |
| S17-final-viral-combined_k141_9841    | [full]   | 43832 | No | NA | 21 | 1 | Medium-quality | Genome-fragment | NA | 87.74 | 0 |
| S17-final-viral-combined_k141_2533151 | [full]   | 1165  | No | NA | 0  | 0 | Not-determined | Genome-fragment | NA | 0     | 0 |
| S17-final-viral-combined_k141_974241  | [full]   | 2355  | No | NA | 0  | 3 | Not-determined | Genome-fragment | NA | 0     | 0 |
| S17-final-viral-combined_k141_98801   | [full]   | 1930  | No | NA | 0  | 3 | Not-determined | Genome-fragment | NA | 0     | 0 |
| S17-final-viral-combined_k141_1441751 | [full]   | 1716  | No | NA | 0  | 2 | Not-determined | Genome-fragment | NA | 0     | 0 |
| S17-final-viral-combined_k141_777601  | [full]   | 15866 | No | NA | 0  | 3 | Not-determined | Genome-fragment | NA | 0     | 0 |
| S17-final-viral-combined_k141_1653451 | [full]   | 7198  | No | NA | 0  | 4 | Not-determined | Genome-fragment | NA | 0     | 0 |
| S17-final-viral-combined_k141_430721  | [full]   | 1259  | No | NA | 0  | 0 | Not-determined | Genome-fragment | NA | 0     | 0 |
| S17-final-viral-combined_k141_1550761 | [full]   | 1237  | No | NA | 0  | 0 | Not-determined | Genome-fragment | NA | 0     | 0 |
| S17-final-viral-combined_k141_1550771 | [full]   | 2257  | No | NA | 0  | 1 | Not-determined | Genome-fragment | NA | 5.65  | 0 |
| S6-final-viral-combined_k141_117231   | [full]   | 2351  | No | NA | 0  | 0 | Low-quality    | Genome-fragment | NA | 1.42  | 0 |
| S11-final-viral-combined_k141_3371911 | [full]   | 2352  | No | NA | 1  | 0 | Low-quality    | Genome-fragment | NA | 3.54  | 0 |
| S5-final-viral-combined_k141_1798161  | [full]   | 2352  | No | NA | 0  | 0 | Low-quality    | Genome-fragment | NA | 0     | 0 |
| S17-final-viral-combined_k141_251354  | [full]   | 1559  | No | NA | 0  | 1 | Not-determined | Genome-fragment | NA | 0     | 0 |
| S17-final-viral-combined_k141_1325771 | [full]   | 5530  | No | NA | 0  | 2 | Not-determined | Genome-fragment | NA | 0     | 0 |
| S17-final-viral-combined_k141_431801  | [full]   | 2744  | No | NA | 0  | 3 | Not-determined | Genome-fragment | NA | 1.27  | 0 |
| S5-final-viral-combined_k141_8161511  | [full]   | 2352  | No | NA | 0  | 2 | Low-quality    | Genome-fragment | NA | 0     | 0 |
| S17-final-viral-combined_k141_431821  | [full]   | 1223  | No | NA | 0  | 2 | Not-determined | Genome-fragment | NA | 0     | 0 |
| S17-final-viral-combined_k141_431941  | [full]   | 7397  | No | NA | 0  | 6 | Not-determined | Genome-fragment | NA | 0     | 0 |
| S2-final-viral-combined_k141_1833561  | [full]   | 2352  | No | NA | 0  | 0 | Low-quality    | Genome-fragment | NA | 6.41  | 0 |
| S1-final-viral-combined_k141_892501   | [full]   | 2353  | No | NA | 0  | 1 | Low-quality    | Genome-fragment | NA | 6.14  | 0 |
| S17-final-viral-combined_k141_199991  | [full]   | 10296 | No | NA | 0  | 8 | Not-determined | Genome-fragment | NA | 0     | 0 |
| S17-final-viral-combined_k141_1653341 | [full]   | 2011  | No | NA | 0  | 0 | Not-determined | Genome-fragment | NA | 0     | 0 |
| S5-final-viral-combined_k141_1447191  | [full]   | 2353  | No | NA | 0  | 0 | Low-quality    | Genome-fragment | NA | 5.04  | 0 |
| S17-final-viral-combined_k141_2534711 | [full]   | 1024  | No | NA | 0  | 1 | Not-determined | Genome-fragment | NA | 0     | 0 |
| S5-final-viral-combined_k141_1400061  | [full]   | 2353  | No | NA | 0  | 0 | Low-quality    | Genome-fragment | NA | 2.66  | 0 |
| S17-final-viral-combined_k141_1664191 | [full]   | 2053  | No | NA | 0  | 2 | Not-determined | Genome-fragment | NA | 0     | 0 |
| S17-final-viral-combined_k141_2151141 | [full]   | 2353  | No | NA | 4  | 0 | Low-quality    | Genome-fragment | NA | 4.71  | 0 |
| S17-final-viral-combined_k141_432241  | [full]   | 6743  | No | NA | 0  | 5 | Not-determined | Genome-fragment | NA | 16.68 | 0 |
| S11-final-viral-combined_k141_2888801 | [full]   | 2354  | No | NA | 0  | 1 | Low-quality    | Genome-fragment | NA | 0     | 0 |
| S17-final-viral-combined_k141_975561  | [full]   | 2897  | No | NA | 0  | 1 | Not-determined | Genome-fragment | NA | 0     | 0 |
| S17-final-viral-combined_k141_1442841 | [full]   | 1400  | No | NA | 0  | 0 | Not-determined | Genome-fragment | NA | 0     | 0 |
| S17-final-viral-combined_k141_1551921 | [full]   | 4947  | No | NA | 0  | 2 | Not-determined | Genome-fragment | NA | 0     | 0 |
| S17-final-viral-combined_k141_1526551 | [full]   | 2459  | No | NA | 0  | 2 | Not-determined | Genome-fragment | NA | 0     | 0 |
| S17-final-viral-combined_k141_1103061 | [full]   | 1034  | No | NA | 0  | 1 | Not-determined | Genome-fragment | NA | 0     | 0 |
| S17-final-viral-combined_k141_1552141 | [full]   | 1072  | No | NA | 0  | 2 | Not-determined | Genome-fragment | NA | 0     | 0 |
| S17-final-viral-combined_k141_1664691 | [full]   | 4285  | No | NA | 0  | 3 | Not-determined | Genome-fragment | NA | 0     | 0 |
| S17-k141_103556                       |          | 2354  | No | NA | 0  | 0 | Low-quality    | Genome-fragment | NA | 4.57  | 0 |
| S17-final-viral-combined_k141_1443351 | [full]   | 2810  | No | NA | 0  | 3 | Not-determined | Genome-fragment | NA | 0     | 0 |
| S17-final-viral-combined_k141_110331  | [full]   | 1089  | No | NA | 0  | 1 | Not-determined | Genome-fragment | NA | 6.91  | 0 |
| S2-final-viral-combined_k141_489501   | [full]   | 2354  | No | NA | 2  | 0 | Low-quality    | Genome-fragment | NA | 2.02  | 0 |
| S8-final-viral-combined_k141_1158211  | [full]   | 2354  | No | NA | 0  | 0 | Low-quality    | Genome-fragment | NA | 0     | 0 |
| S17-final-viral-combined_k141_1654721 | [full]   | 2849  | No | NA | 0  | 0 | Not-determined | Genome-fragment | NA | 0     | 0 |
| S17-final-viral-combined_k141_1317441 | [full]   | 1811  | No | NA | 0  | 2 | Not-determined | Genome-fragment | NA | 0     | 0 |
| S5-final-viral-combined_k141_146871   | [full]   | 2355  | No | NA | 0  | 1 | Low-quality    | Genome-fragment | NA | 0.72  | 0 |
| S7-final-viral-combined_k141_1735041  | [full]   | 2355  | No | NA | 2  | 1 | Low-quality    | Genome-fragment | NA | 3.67  | 0 |
| S17-final-viral-combined_k141_165121  | [full]   | 2094  | No | NA | 12 | 0 | Not-determined | Genome-fragment | NA | 0     | 0 |
| S17-final-viral-combined_k141_1655151 | [full]   | 1743  | No | NA | 0  | 0 | Not-determined | Genome-fragment | NA | 0     | 0 |
| S17-final-viral-combined_k141_253491  | [full]   | 4949  | No | NA | 13 | 0 | High-quality   | High-quality    | NA | 99.37 | 0 |
| S17-final-viral-combined_k141_71181   | [full]   | 2355  | No | NA | 0  | 1 | Low-quality    | Genome-fragment | NA | 1.68  | 0 |
| S17-final-viral-combined_k141_1655221 | [full]   | 2417  | No | NA | 0  | 0 | Not-determined | Genome-fragment | NA | 0     | 0 |
| S17-final-viral-combined_k141_433971  | [full]   | 1910  | No | NA | 0  | 0 | Not-determined | Genome-fragment | NA | 0     | 0 |
| S1-final-viral-combined_k141_120941   | [full]   | 2356  | No | NA | 0  | 2 | Low-quality    | Genome-fragment | NA | 1.19  | 0 |
| S17-final-viral-combined_k141_1444501 | [full]   | 1780  | No | NA | 0  | 1 | Not-determined | Genome-fragment | NA | 0     | 0 |
| S12-final-viral-combined_k141_1114421 | [full]   | 2356  | No | NA | 3  | 0 | Low-quality    | Genome-fragment | NA | 4.44  | 0 |
| S12-final-viral-combined_k141_1128851 | [full]   | 2356  | No | NA | 2  | 0 | Low-quality    | Genome-fragment | NA | 5.79  | 0 |
| S17-final-viral-combined_k141_97611   | [full]   | 1854  | No | NA | 0  | 1 | Not-determined | Genome-fragment | NA | 0     | 0 |
| S17-final-viral-combined_k141_1444621 | [full]   | 10583 | No | NA | 0  | 4 | Not-determined | Genome-fragment | NA | 0     | 0 |
| S1-final-viral-combined_k141_1136301  | [full]   | 2357  | No | NA | 0  | 1 | Low-quality    | Genome-fragment | NA | 4.8   | 0 |
| S17-final-viral-combined_k141_1238091 | [full]   | 18407 | No | NA | 0  | 2 | Not-determined | Genome-fragment | NA | 0     | 0 |
| S17-final-viral-combined_k141_977051  | [full]   | 5307  | No | NA | 0  | 1 | Not-determined | Genome-fragment | NA | 0     | 0 |
| S17-final-viral-combined_k141_434701  | [full]   | 3679  | No | NA | 0  | 0 | Not-determined | Genome-fragment | NA | 0     | 0 |
| S17-final-viral-combined_k141_434811  | [full]   | 2828  | No | NA | 0  | 2 | Not-determined | Genome-fragment | NA | 0     | 0 |
| S17-final-viral-combined_k141_2650001 | [full]   | 1388  | No | NA | 0  | 0 | Not-determined | Genome-fragment | NA | 0     | 0 |
| S17-final-viral-combined_k141_1528971 | [full]   | 1424  | No | NA | 0  | 0 | Not-determined | Genome-fragment | NA | 0     |   |



|                                       |          |        |     |      |    |    |                |                 |       |       |
|---------------------------------------|----------|--------|-----|------|----|----|----------------|-----------------|-------|-------|
| S11-final-viral-combined_k141_1731219 | [full]   | 2364   | No  | NA   | 0  | 2  | Low-quality    | Genome-fragment | 3.52  | 0     |
| S17-final-viral-combined_k141_200701  | [full]   | 8463   | No  | NA   | 0  | 1  | Not-determined | Genome-fragment | NA    | 0     |
| S17-final-viral-combined_k141_133168  | [full]   | 1613   | No  | NA   | 0  | 2  | Not-determined | Genome-fragment | NA    | 0     |
| S17-final-viral-combined_k141_155664  | [full]   | 2364   | No  | NA   | 1  | 0  | Low-quality    | Genome-fragment | 4.22  | 0     |
| S17-final-viral-combined_k141_133175  | [full]   | 1861   | No  | NA   | 0  | 1  | Not-determined | Genome-fragment | NA    | 0     |
| S12-final-viral-combined_k141_187160  | [full]   | 2364   | No  | NA   | 0  | 0  | Low-quality    | Genome-fragment | 4.71  | 0     |
| S17-final-viral-combined_k141_254094  | [full]   | 2118   | No  | NA   | 0  | 1  | Not-determined | Genome-fragment | NA    | 0     |
| S12-final-viral-combined_k141_340810  | [full]   | 2364   | No  | NA   | 0  | 0  | Low-quality    | Genome-fragment | 5.08  | 0     |
| S17-final-viral-combined_k141_439091  | [full]   | 1780   | No  | NA   | 0  | 1  | Not-determined | Genome-fragment | NA    | 0     |
| S4-final-viral-combined_k141_75455    | [full]   | 2364   | No  | NA   | 2  | 0  | Low-quality    | Genome-fragment | 4.83  | 0     |
| S17-final-viral-combined_k141_110680  | [full]   | 3206   | No  | NA   | 0  | 1  | Not-determined | Genome-fragment | NA    | 0     |
| S17-final-viral-combined_k141_244090  | [full]   | 2028   | No  | NA   | 0  | 3  | Not-determined | Genome-fragment | NA    | 0     |
| S17-final-viral-combined_k141_166124  | [full]   | 1659   | No  | NA   | 0  | 0  | Not-determined | Genome-fragment | NA    | 0     |
| S11-final-viral-combined_k141_291275  | [full]   | 2365   | No  | NA   | 0  | 0  | Low-quality    | Genome-fragment | 6.91  | 0     |
| S17-final-viral-combined_k141_240694  | [full]   | 3076   | No  | NA   | 0  | 0  | Not-determined | Genome-fragment | NA    | 0     |
| S17-final-viral-combined_k141_439081  | [full]   | 4453   | No  | NA   | 0  | 2  | Not-determined | Genome-fragment | NA    | 0     |
| S5-final-viral-combined_k141_50546    | [full]   | 2365   | No  | NA   | 1  | 0  | Low-quality    | Genome-fragment | 3.8   | 0     |
| S17-final-viral-combined_k141_53393   | [full]   | 3123   | No  | NA   | 0  | 4  | Not-determined | Genome-fragment | NA    | 0     |
| S17-final-viral-combined_k141_23605   | [full]   | 3009   | No  | NA   | 0  | 1  | Not-determined | Genome-fragment | NA    | 0     |
| S17-final-viral-combined_k141_20741   | [full]   | 6419   | No  | NA   | 0  | 4  | Not-determined | Genome-fragment | NA    | 0     |
| S17-final-viral-combined_k141_179088  | [full]   | 2365   | No  | NA   | 0  | 1  | Low-quality    | Genome-fragment | 5.66  | 0     |
| S17-final-viral-combined_k141_20740   | [full]   | 1658   | No  | NA   | 0  | 0  | Not-determined | Genome-fragment | NA    | 0     |
| S17-final-viral-combined_k141_98256   | [full]   | 1264   | No  | NA   | 0  | 0  | Not-determined | Genome-fragment | NA    | 0     |
| S17-final-viral-combined_k141_44049   | [full]   | 3039   | No  | NA   | 0  | 0  | Not-determined | Genome-fragment | NA    | 0     |
| S17-final-viral-combined_k141_240657  | [full]   | 3056   | No  | NA   | 0  | 3  | Not-determined | Genome-fragment | NA    | 0     |
| S17-final-viral-combined_k141_98288   | [full]   | 1660   | No  | NA   | 0  | 1  | Not-determined | Genome-fragment | NA    | 0     |
| S17-final-viral-combined_k141_166178  | [full]   | 2197   | No  | NA   | 0  | 3  | Not-determined | Genome-fragment | NA    | 0     |
| S4-final-viral-combined_k141_62335    | [full]   | 2365   | No  | NA   | 0  | 1  | Low-quality    | Genome-fragment | 0.32  | 0     |
| S17-final-viral-combined_k141_133031  | [full]   | 1406   | No  | NA   | 0  | 1  | Not-determined | Genome-fragment | NA    | 0     |
| S1-final-viral-combined_k141_30315    | [full]   | 2366   | No  | NA   | 1  | 0  | Low-quality    | Genome-fragment | 4.06  | 0     |
| S17-final-viral-combined_k141_60400   | [full]   | 2366   | No  | NA   | 0  | 3  | Low-quality    | Genome-fragment | 2.64  | 0     |
| S17-final-viral-combined_k141_23810   | [full]   | 1738   | No  | NA   | 0  | 0  | Not-determined | Genome-fragment | NA    | 0     |
| S12-final-viral-combined_k141_60626   | [full]   | 2366   | No  | NA   | 1  | 0  | Low-quality    | Genome-fragment | 4.4   | 0     |
| S4-final-viral-combined_k141_73684    | [full]   | 2366   | No  | NA   | 0  | 1  | Low-quality    | Genome-fragment | 1.51  | 0     |
| S17-final-viral-combined_k141_110764  | [full]   | 3234   | No  | NA   | 0  | 1  | Not-determined | Genome-fragment | NA    | 0     |
| S17-final-viral-combined_k141_244286  | [full]   | 3729   | No  | NA   | 0  | 2  | Not-determined | Genome-fragment | NA    | 0     |
| S6-final-viral-combined_k141_136692   | [full]   | 2366   | No  | NA   | 0  | 1  | Low-quality    | Genome-fragment | 2.81  | 0     |
| S17-final-viral-combined_k141_244306  | [full]   | 4881   | No  | NA   | 0  | 4  | Not-determined | Genome-fragment | NA    | 0     |
| S17-final-viral-combined_k141_244335  | [full]   | 1826   | No  | NA   | 0  | 0  | Not-determined | Genome-fragment | NA    | 0     |
| S17-final-viral-combined_k141_166192  | [full]   | 2376   | No  | NA   | 0  | 1  | Not-determined | Genome-fragment | NA    | 0     |
| S17-final-viral-combined_k141_32886   | [full]   | 1339   | No  | NA   | 0  | 2  | Not-determined | Genome-fragment | NA    | 0     |
| S6-final-viral-combined_k141_401489   | [full]   | 2366   | No  | NA   | 0  | 1  | Low-quality    | Genome-fragment | 1.48  | 0     |
| S17-final-viral-combined_k141_265510  | [full]   | 1013   | No  | NA   | 0  | 0  | Not-determined | Genome-fragment | NA    | 0     |
| S17-final-viral-combined_k141_10770   | [full]   | 4932   | No  | NA   | 0  | 1  | Not-determined | Genome-fragment | NA    | 0     |
| S17-final-viral-combined_k141_254285  | [full]   | 1373   | No  | NA   | 0  | 2  | Not-determined | Genome-fragment | NA    | 0     |
| S8-final-viral-combined_k141_135482   | [full]   | 2366   | No  | NA   | 0  | 2  | Low-quality    | Genome-fragment | 0.75  | 0     |
| S17-final-viral-combined_k141_98460   | [full]   | 1770   | No  | NA   | 0  | 2  | Not-determined | Genome-fragment | NA    | 0     |
| S17-final-viral-combined_k141_244371  | [full]   | 1570   | No  | NA   | 0  | 0  | Not-determined | Genome-fragment | NA    | 0     |
| S7-final-viral-combined_k141_117002   | [full]   | 2827   | No  | NA   | 0  | 2  | Low-quality    | Genome-fragment | 3.16  | 0     |
| S2-final-viral-combined_k141_67360    | [full]   | 2367   | No  | NA   | 0  | 1  | Low-quality    | Genome-fragment | 2.53  | 0     |
| S9-final-viral-combined_k141_75046    | [full]   | 2368   | No  | NA   | 0  | 1  | Low-quality    | Genome-fragment | 4.45  | 0     |
| S5-final-viral-combined_k141_99607    | [full]   | 2368   | No  | NA   | 2  | 2  | Low-quality    | Genome-fragment | 5.27  | 0     |
| S17-final-viral-combined_k141_123393  | [full]   | 2368   | No  | NA   | 2  | 0  | Low-quality    | Genome-fragment | 2.88  | 0     |
| S17-final-viral-combined_k141_163057  | [full]   | 2368   | No  | NA   | 0  | 9  | Not-determined | Genome-fragment | NA    | 0     |
| S17-final-viral-combined_k141_21609   | [full]   | 121476 | No  | NA   | 0  | 2  | Not-determined | Genome-fragment | NA    | 0     |
| S17-final-viral-combined_k141_254433  | [full]   | 1216   | No  | NA   | 0  | 2  | Not-determined | Genome-fragment | NA    | 0     |
| S17-final-viral-combined_k141_244432  | [full]   | 1174   | No  | NA   | 0  | 1  | Not-determined | Genome-fragment | NA    | 0     |
| S12-final-viral-combined_k141_235545  | [full]   | 2368   | No  | NA   | 5  | 0  | Low-quality    | Genome-fragment | 5.1   | 0     |
| S2-final-viral-combined_k141_163071   | [full]   | 2368   | No  | NA   | 0  | 0  | Low-quality    | Genome-fragment | 5.38  | 0     |
| S17-final-viral-combined_k141_98567   | [full]   | 1085   | No  | NA   | 0  | 0  | Not-determined | Genome-fragment | NA    | 0     |
| S17-final-viral-combined_k141_33027   | [full]   | 1701   | No  | NA   | 0  | 2  | Not-determined | Genome-fragment | NA    | 0     |
| S17-final-viral-combined_k141_53393   | [full]   | 1400   | No  | NA   | 0  | 0  | Not-determined | Genome-fragment | NA    | 0     |
| S17-final-viral-combined_k141_53414   | [full]   | 1184   | No  | NA   | 0  | 1  | Not-determined | Genome-fragment | NA    | 0     |
| S6_k141_68946                         |          | 2368   | No  | NA   | 0  | 2  | Low-quality    | Genome-fragment | 1.97  | 0     |
| S17-final-viral-combined_k141_21215   | [full]   | 15744  | No  | NA   | 10 | 0  | Not-determined | Genome-fragment | NA    | 0     |
| S8-final-viral-combined_k141_219112   | [H2gene] | 2368   | No  | NA   | 2  | 0  | Low-quality    | Genome-fragment | 5.2   | 0     |
| S17-final-viral-combined_k141_33105   | [full]   | 1412   | No  | NA   | 0  | 3  | Not-determined | Genome-fragment | NA    | 0     |
| S17-final-viral-combined_k141_265702  | [full]   | 1245   | No  | NA   | 0  | 0  | Not-determined | Genome-fragment | NA    | 0     |
| S17-final-viral-combined_k141_11041   | [full]   | 3112   | No  | NA   | 0  | 1  | Not-determined | Genome-fragment | NA    | 0     |
| S11-final-viral-combined_k141_182489  | [full]   | 2369   | No  | NA   | 0  | 2  | Low-quality    | Genome-fragment | 1.16  | 0     |
| S12-final-viral-combined_k141_99126   | [full]   | 2369   | No  | NA   | 0  | 0  | Low-quality    | Genome-fragment | 1.41  | 0     |
| S8_k141_236161                        |          | 2369   | No  | NA   | 0  | 0  | Low-quality    | Genome-fragment | 1.89  | 0     |
| S17-final-viral-combined_k141_98757   | [full]   | 2861   | No  | NA   | 0  | 2  | Not-determined | Genome-fragment | NA    | 0     |
| S17-final-viral-combined_k141_265756  | [full]   | 1178   | No  | NA   | 0  | 0  | Not-determined | Genome-fragment | NA    | 0     |
| S17-final-viral-combined_k141_265767  | [full]   | 1619   | No  | NA   | 0  | 0  | Not-determined | Genome-fragment | NA    | 0     |
| S1_k141_298129                        |          | 2370   | Yes | 1428 | 1  | 1  | Low-quality    | Genome-fragment | 3.7   | 39.75 |
| S17-final-viral-combined_k141_21314   | [full]   | 1145   | No  | NA   | 0  | 1  | Not-determined | Genome-fragment | NA    | 0     |
| S17-final-viral-combined_k141_33175   | [full]   | 2369   | No  | NA   | 0  | 1  | Not-determined | Genome-fragment | NA    | 0     |
| S17-final-viral-combined_k141_166391  | [full]   | 1210   | No  | NA   | 0  | 0  | Not-determined | Genome-fragment | NA    | 0     |
| S8-final-viral-combined_k141_116991   | [full]   | 2370   | No  | NA   | 0  | 0  | Low-quality    | Genome-fragment | 3.74  | 0     |
| S17-final-viral-combined_k141_254591  | [full]   | 2711   | No  | NA   | 0  | 3  | Not-determined | Genome-fragment | NA    | 0     |
| S17-final-viral-combined_k141_98516   | [full]   | 2195   | No  | NA   | 0  | 0  | Not-determined | Genome-fragment | NA    | 0     |
| S17-final-viral-combined_k141_254627  | [full]   | 1068   | No  | NA   | 0  | 0  | Not-determined | Genome-fragment | NA    | 0     |
| S17-final-viral-combined_k141_21440   | [full]   | 3799   | No  | NA   | 0  | 0  | Not-determined | Genome-fragment | NA    | 0     |
| S17-final-viral-combined_k141_111040  | [full]   | 3752   | No  | NA   | 0  | 1  | Not-determined | Genome-fragment | NA    | 0     |
| S17-final-viral-combined_k141_33293   | [full]   | 26635  | No  | NA   | 0  | 16 | Not-determined | Genome-fragment | NA    | 0     |
| S1-final-viral-combined_k141_68461    | [full]   | 2371   | No  | NA   | 0  | 0  | Low-quality    | Genome-fragment | 2.28  | 0     |
| S4-final-viral-combined_k141_360846   | [full]   | 2371   | Yes | 448  | 1  | 1  | Low-quality    | Genome-fragment | 0.18  | 81.11 |
| S17-final-viral-combined_k141_266170  | [full]   | 1658   | No  | NA   | 0  | 2  | Not-determined | Genome-fragment | NA    | 0     |
| S17-final-viral-combined_k141_254710  | [full]   | 1476   | No  | NA   | 0  | 1  | Not-determined | Genome-fragment | NA    | 0     |
| S8_k141_297                           |          | 2371   | No  | NA   | 0  | 0  | Low-quality    | Genome-fragment | 6.54  | 0     |
| S1-final-viral-combined_k141_155188   | [full]   | 2372   | No  | NA   | 0  | 0  | Low-quality    | Genome-fragment | 1.7   | 0     |
| S5-final-viral-combined_k141_19304    | [full]   | 2372   | No  | NA   | 0  | 2  | Low-quality    | Genome-fragment | 5.2   | 0     |
| S7-final-viral-combined_k141_23554    | [full]   | 2372   | No  | NA   | 0  | 0  | Low-quality    | Genome-fragment | 5.11  | 0     |
| S5_k141_25084                         |          | 2373   | No  | NA   | 1  | 0  | Low-quality    | Genome-fragment | 6.95  | 0     |
| S12-final-viral-combined_k141_120970  | [full]   | 2373   | No  | NA   | 0  | 1  | Low-quality    | Genome-fragment | 1.53  | 0     |
| S17-final-viral-combined_k141_21733   | [full]   | 1828   | No  | NA   | 0  | 2  | Not-determined | Genome-fragment | NA    | 0     |
| S12-final-viral-combined_k141_243938  | [full]   | 2373   | No  | NA   | 2  | 0  | Low-quality    | Genome-fragment | 3.35  | 0     |
| S17-final-viral-combined_k141_264381  | [full]   | 1562   | No  | NA   | 0  | 2  | Not-determined | Genome-fragment | NA    | 0     |
| S17-final-viral-combined_k141_254877  | [full]   | 2562   | No  | NA   | 0  | 4  | Not-determined | Genome-fragment | NA    | 0     |
| S12-final-viral-combined_k141_316891  | [full]   | 2373   | No  | NA   | 0  | 3  | Low-quality    | Genome-fragment | 1.83  | 0     |
| S17-final-viral-combined_k141_254904  | [full]   | 2366   | No  | NA   | 0  | 1  | Not-determined | Genome-fragment | NA    | 0     |
| S4-final-viral-combined_k141_58722    | [full]   | 2373   | No  | NA   | 0  | 0  | Low-quality    | Genome-fragment | 6.15  | 0     |
| S17-final-viral-combined_k141_99306   | [full]   | 4506   | No  | NA   | 0  | 3  | Not-determined | Genome-fragment | NA    | 0     |
| S1-final-viral-combined_k141_270013   | [full]   | 2374   | No  | NA   | 0  | 2  | Low-quality    | Genome-fragment | 0.69  | 0     |
| S1_k141_333993                        |          | 2374   | No  | NA   | 0  | 0  | Low-quality    | Genome-fragment | 3.51  | 0     |
| S17-final-viral-combined_k141_266479  | [full]   | 3398   | No  | NA   | 0  | 3  | Not-determined | Genome-fragment | NA    | 0     |
| S17-final-viral-combined_k141_21908   | [full]   | 2486   | No  | NA   | 0  | 0  | Not-determined | Genome-fragment | NA    | 0     |
| S5-final-viral-combined_k141_15660    | [full]   | 2374   | No  | NA   | 0  | 0  | Low-quality    | Genome-fragment | 5.46  | 0     |
| S12-final-viral-combined_k141_169312  | [full]   | 2374   | No  | NA   | 0  | 0  | Low-quality    | Genome-fragment | 5.54  | 0     |
| S17-final-viral-combined_k141_29532   | [full]   | 1725   | No  | NA   | 0  | 1  | Not-determined | Genome-fragment | NA    | 0     |
| S8-final-viral-combined_k141_123098   | [full]   | 2374   | No  | NA   | 0  | 0  | Low-quality    | Genome-fragment | 1.13  | 0     |
| S17-final-viral-combined_k141_21986   | [full]   | 2086   | No  | NA   | 0  | 0  | Not-determined | Genome-fragment | NA    | 0     |
| S11-final-viral-combined_k141_184695  | [full]   | 2375   | No  | NA   | 0  | 0  | Low-quality    | Genome-fragment | 2.54  | 0     |
| S17-final-viral-combined_k141_54126   | [full]   | 1653   | No  | NA   | 0  | 2  | Not-determined | Genome-fragment | NA    | 0     |
| S17-final-viral-combined_k141_93915   | [full]   | 2375   | No  | NA   | 1  | 0  | Low-quality    | Genome-fragment | 4.08  | 0     |
| S17-final-viral-combined_k141_99577   | [full]   | 2108   | No  | NA   | 0  | 0  | Not-determined | Genome-fragment | NA    | 0     |
| S17-final-viral-combined_k141_255279  | [full]   | 3145   | No  | NA   | 0  | 2  | Not-determined | Genome-fragment | NA    | 0     |
| S8-final-viral-combined_k141_15814    | [full]   | 2375   | No  | NA   | 1  | 0  | Low-quality    | Genome-fragment | 9.38  | 0     |
| S17-final-viral-combined_k141_99687   | [full]   | 1711   | No  | NA   | 0  | 2  | Not-determined | Genome-fragment | NA    | 0     |
| S17-final-viral-combined_k141_99694   | [full]   | 2165   | No  | NA   | 0  | 0  | Not-determined | Genome-fragment | NA    | 0     |
| S1-final-viral-combined_k141_289796   | [full]   | 2376   | No  | NA   | 0  | 2  | Low-quality    | Genome-fragment | 8.17  | 0     |
| S3-final-viral-combined_k141_77464    | [full]   | 2376   | No  | NA   | 0  | 1  | Low-quality    | Genome-fragment | 0.99  | 0     |
| S5_k141_138856                        |          | 2376   | Yes | 1662 | 1  | 1  | Low-quality    | Genome-fragment | 0.54  | 30.05 |
| S17-final-viral-combined_k141_54632   | [full]   | 2959   | No  | NA   | 0  | 2  | Not-determined | Genome-fragment | NA    | 0     |
| S12_k141_121782                       |          | 2376   | No  | NA   | 0  | 0  | Low-quality    | Genome-fragment | 10.09 | 0     |
| S17-final-viral-combined_k141_99780   | [full]   | 3146   | No  | NA   | 0  | 6  | Not-determined | Genome-fragment | NA    | 0     |
| S4-final-viral-combined_k141_93281    | [full]   | 2376   | No  | NA   | 0  | 2  | Low-quality    | Genome-fragment | 1.15  | 0     |
| S17-final-viral-combined_k141_255537  | [full]   | 4323   | No  | NA   | 0  | 0  | Not-determined | Genome-fragment | NA    | 0     |



|                                      |          |      |     |    |   |   |                |                 |       |       |
|--------------------------------------|----------|------|-----|----|---|---|----------------|-----------------|-------|-------|
| 58-final-viral-combined_k141_104532  | [full]   | 2385 | No  | NA | 0 | 0 | Low-quality    | Genome-fragment | 15.42 | 0     |
| 57-final-viral-combined_k141_75492   | [full]   | 2386 | No  | NA | 2 | 1 | Low-quality    | Genome-fragment | 1.73  | 0     |
| 517-final-viral-combined_k141_155785 | [H2gene] | 1113 | No  | NA | 0 | 1 | Not-determined | Genome-fragment | NA    | 0     |
| 512-final-viral-combined_k141_349561 | [full]   | 2386 | No  | NA | 2 | 0 | Low-quality    | Genome-fragment | 7.7   | 0     |
| 512_k141_91591                       |          | 2386 | Yes | NA | 1 | 1 | Low-quality    | Genome-fragment | 0.75  | 42.12 |
| 51-final-viral-combined_k141_139789  | [full]   | 2387 | No  | NA | 0 | 1 | Low-quality    | Genome-fragment | 0.75  | 0     |
| 55-final-viral-combined_k141_86134   | [full]   | 2387 | No  | NA | 0 | 1 | Low-quality    | Genome-fragment | 3.39  | 0     |
| 517-final-viral-combined_k141_89332  | [H2gene] | 1226 | No  | NA | 0 | 0 | Not-determined | Genome-fragment | NA    | 0     |
| 517-final-viral-combined_k141_33811  | [H2gene] | 1047 | No  | NA | 0 | 0 | Not-determined | Genome-fragment | NA    | 0     |
| 512-final-viral-combined_k141_302502 | [full]   | 2387 | No  | NA | 1 | 0 | Low-quality    | Genome-fragment | 4.87  | 0     |
| 52-final-viral-combined_k141_138869  | [full]   | 2387 | No  | NA | 1 | 0 | Low-quality    | Genome-fragment | 4.71  | 0     |
| 52-final-viral-combined_k141_28309   | [full]   | 2387 | No  | NA | 0 | 0 | Low-quality    | Genome-fragment | 9.9   | 0     |
| 58-final-viral-combined_k141_219854  | [full]   | 2387 | No  | NA | 3 | 0 | Low-quality    | Genome-fragment | 1.1   | 0     |
| 51-final-viral-combined_k141_67061   | [full]   | 2388 | No  | NA | 0 | 1 | Low-quality    | Genome-fragment | 1.62  | 0     |
| 517-final-viral-combined_k141_99543  | [full]   | 2388 | No  | NA | 0 | 2 | Low-quality    | Genome-fragment | 1.35  | 0     |
| 517-final-viral-combined_k141_1274   | [H2gene] | 1069 | No  | NA | 0 | 0 | Not-determined | Genome-fragment | NA    | 0     |
| 512-final-viral-combined_k141_99678  | [full]   | 2388 | No  | NA | 3 | 0 | Low-quality    | Genome-fragment | 4.77  | 0     |
| 54_k141_141336                       |          | 2388 | No  | NA | 1 | 0 | Low-quality    | Genome-fragment | 7.05  | 0     |
| 512_k141_62469                       |          | 2389 | No  | NA | 0 | 0 | Low-quality    | Genome-fragment | 5.48  | 0     |
| 52-final-viral-combined_k141_236123  | [full]   | 2389 | No  | NA | 0 | 0 | Low-quality    | Genome-fragment | 5.61  | 0     |
| 511-final-viral-combined_k141_165265 | [full]   | 2390 | No  | NA | 1 | 0 | Low-quality    | Genome-fragment | 1.45  | 0     |
| 51-final-viral-combined_k141_206852  | [full]   | 2390 | No  | NA | 0 | 1 | Low-quality    | Genome-fragment | 1.33  | 0     |
| 517-final-viral-combined_k141_23835  | [H2gene] | 1961 | No  | NA | 0 | 0 | Not-determined | Genome-fragment | NA    | 0     |
| 517-final-viral-combined_k141_84130  | [full]   | 2390 | No  | NA | 1 | 0 | Low-quality    | Genome-fragment | 1.52  | 0     |
| 517-final-viral-combined_k141_115518 | [H2gene] | 1254 | No  | NA | 0 | 0 | Not-determined | Genome-fragment | NA    | 0     |
| 517-final-viral-combined_k141_35500  | [H2gene] | 1276 | No  | NA | 0 | 0 | Not-determined | Genome-fragment | NA    | 0     |
| 517-final-viral-combined_k141_146765 | [H2gene] | 1568 | No  | NA | 0 | 0 | Not-determined | Genome-fragment | NA    | 0     |
| 517-final-viral-combined_k141_135813 | [H2gene] | 1652 | No  | NA | 0 | 1 | Not-determined | Genome-fragment | NA    | 0     |
| 58-final-viral-combined_k141_118361  | [full]   | 2390 | No  | NA | 0 | 0 | Low-quality    | Genome-fragment | 5.14  | 0     |
| 52-final-viral-combined_k141_10680   | [full]   | 2391 | No  | NA | 2 | 0 | Low-quality    | Genome-fragment | 6.48  | 0     |
| 58-final-viral-combined_k141_30926   | [full]   | 2391 | No  | NA | 0 | 0 | Low-quality    | Genome-fragment | 4.28  | 0     |
| 517-final-viral-combined_k141_173208 | [full]   | 2393 | No  | NA | 0 | 0 | Low-quality    | Genome-fragment | 6.23  | 0     |
| 517-final-viral-combined_k141_246593 | [H2gene] | 1028 | No  | NA | 0 | 0 | Not-determined | Genome-fragment | NA    | 0     |
| 52-final-viral-combined_k141_232608  | [full]   | 2393 | No  | NA | 0 | 1 | Low-quality    | Genome-fragment | 5.42  | 0     |
| 517-final-viral-combined_k141_246622 | [H2gene] | 1285 | No  | NA | 0 | 0 | Not-determined | Genome-fragment | NA    | 0     |
| 55-final-viral-combined_k141_58925   | [full]   | 2394 | No  | NA | 0 | 0 | Low-quality    | Genome-fragment | 3.59  | 0     |
| 517-final-viral-combined_k141_202248 | [full]   | 2394 | No  | NA | 2 | 0 | Low-quality    | Genome-fragment | 5.27  | 0     |
| 517-final-viral-combined_k141_58144  | [H2gene] | 1862 | No  | NA | 0 | 2 | Not-determined | Genome-fragment | NA    | 0     |
| 517-final-viral-combined_k141_102496 | [H2gene] | 1213 | No  | NA | 1 | 0 | Not-determined | Genome-fragment | NA    | 0     |
| 517-final-viral-combined_k141_36061  | [H2gene] | 2155 | No  | NA | 0 | 0 | Not-determined | Genome-fragment | NA    | 0     |
| 511-final-viral-combined_k141_72401  | [full]   | 2395 | No  | NA | 1 | 0 | Low-quality    | Genome-fragment | 4.97  | 0     |
| 517-final-viral-combined_k141_20242  | [H2gene] | 1044 | No  | NA | 1 | 0 | Not-determined | Genome-fragment | NA    | 0     |
| 55-final-viral-combined_k141_153266  | [full]   | 2395 | No  | NA | 1 | 0 | Low-quality    | Genome-fragment | 2.68  | 0     |
| 58-final-viral-combined_k141_178829  | [full]   | 2395 | No  | NA | 2 | 0 | Low-quality    | Genome-fragment | 4.86  | 0     |
| 517-final-viral-combined_k141_236282 | [H2gene] | 1203 | No  | NA | 0 | 0 | Not-determined | Genome-fragment | NA    | 0     |
| 511-final-viral-combined_k141_214514 | [full]   | 2396 | No  | NA | 0 | 0 | Low-quality    | Genome-fragment | 1.42  | 0     |
| 512-final-viral-combined_k141_231355 | [full]   | 2397 | No  | NA | 0 | 0 | Low-quality    | Genome-fragment | 5.18  | 0     |
| 51-final-viral-combined_k141_1118    | [full]   | 2398 | No  | NA | 0 | 1 | Low-quality    | Genome-fragment | 2.6   | 0     |
| 517-k141_156308                      |          | 2398 | No  | NA | 0 | 0 | Low-quality    | Genome-fragment | 3.98  | 0     |
| 517-final-viral-combined_k141_115238 | [H2gene] | 1052 | No  | NA | 0 | 1 | Not-determined | Genome-fragment | NA    | 0     |
| 517-final-viral-combined_k141_225887 | [H2gene] | 1072 | No  | NA | 0 | 0 | Not-determined | Genome-fragment | NA    | 0     |
| 512-final-viral-combined_k141_130588 | [full]   | 2398 | No  | NA | 0 | 0 | Low-quality    | Genome-fragment | 3.58  | 0     |
| 517-final-viral-combined_k141_103309 | [H2gene] | 1665 | No  | NA | 0 | 1 | Not-determined | Genome-fragment | NA    | 0     |
| 517-final-viral-combined_k141_236752 | [H2gene] | 1526 | No  | NA | 0 | 0 | Not-determined | Genome-fragment | NA    | 0     |
| 52-final-viral-combined_k141_249951  | [full]   | 2398 | No  | NA | 0 | 0 | Low-quality    | Genome-fragment | 5.15  | 0     |
| 517-final-viral-combined_k141_170483 | [H2gene] | 1500 | No  | NA | 0 | 0 | Not-determined | Genome-fragment | NA    | 0     |
| 58-final-viral-combined_k141_188518  | [full]   | 2398 | No  | NA | 0 | 1 | Low-quality    | Genome-fragment | 3.38  | 0     |
| 58_k141_220505                       |          | 2398 | No  | NA | 3 | 0 | Low-quality    | Genome-fragment | 7.52  | 0     |
| 517-final-viral-combined_k141_82313  | [H2gene] | 1163 | No  | NA | 0 | 0 | Not-determined | Genome-fragment | NA    | 0     |
| 517-final-viral-combined_k141_59193  | [H2gene] | 1219 | No  | NA | 0 | 0 | Not-determined | Genome-fragment | NA    | 0     |
| 517-final-viral-combined_k141_215684 | [H2gene] | 1088 | No  | NA | 0 | 0 | Not-determined | Genome-fragment | NA    | 0     |
| 517-final-viral-combined_k141_25448  | [full]   | 2244 | No  | NA | 0 | 0 | Not-determined | Genome-fragment | NA    | 0     |
| 517-final-viral-combined_k141_148583 | [H2gene] | 1162 | No  | NA | 0 | 0 | Not-determined | Genome-fragment | NA    | 0     |
| 58-final-viral-combined_k141_71650   | [full]   | 2399 | No  | NA | 0 | 1 | Low-quality    | Genome-fragment | 1.28  | 0     |
| 511-final-viral-combined_k141_133816 | [full]   | 2400 | No  | NA | 0 | 0 | Low-quality    | Genome-fragment | 1.72  | 0     |
| 517-final-viral-combined_k141_215754 | [H2gene] | 1280 | No  | NA | 0 | 0 | Not-determined | Genome-fragment | NA    | 0     |
| 57-final-viral-combined_k141_183765  | [full]   | 2400 | No  | NA | 2 | 0 | Low-quality    | Genome-fragment | 5.39  | 0     |
| 57-final-viral-combined_k141_81297   | [full]   | 2400 | No  | NA | 0 | 0 | Low-quality    | Genome-fragment | 3.89  | 0     |
| 517-final-viral-combined_k141_207007 | [full]   | 2400 | No  | NA | 0 | 0 | Low-quality    | Genome-fragment | 1.26  | 0     |
| 512-final-viral-combined_k141_177679 | [full]   | 2400 | No  | NA | 0 | 2 | Low-quality    | Genome-fragment | 5.48  | 0     |
| 517-final-viral-combined_k141_4271   | [H2gene] | 1103 | No  | NA | 0 | 0 | Not-determined | Genome-fragment | NA    | 0     |
| 512-final-viral-combined_k141_97861  | [full]   | 2400 | No  | NA | 0 | 1 | Low-quality    | Genome-fragment | 3.22  | 0     |
| 56-final-viral-combined_k141_127600  | [full]   | 2400 | No  | NA | 3 | 0 | Low-quality    | Genome-fragment | 3.19  | 0     |
| 511-final-viral-combined_k141_292697 | [full]   | 2401 | No  | NA | 0 | 0 | Low-quality    | Genome-fragment | 1.62  | 0     |
| 511-final-viral-combined_k141_86154  | [full]   | 2402 | No  | NA | 0 | 2 | Low-quality    | Genome-fragment | 2.2   | 0     |
| 511-final-viral-combined_k141_33773  | [full]   | 2402 | No  | NA | 0 | 3 | Low-quality    | Genome-fragment | 2.74  | 0     |
| 517-final-viral-combined_k141_216541 | [H2gene] | 1062 | No  | NA | 0 | 0 | Not-determined | Genome-fragment | NA    | 0     |
| 51-final-viral-combined_k141_150311  | [full]   | 2402 | No  | NA | 1 | 0 | Low-quality    | Genome-fragment | 5.45  | 0     |
| 51-final-viral-combined_k141_128861  | [full]   | 2402 | No  | NA | 0 | 1 | Low-quality    | Genome-fragment | 2.01  | 0     |
| 517-final-viral-combined_k141_71796  | [H2gene] | 1655 | No  | NA | 0 | 2 | Not-determined | Genome-fragment | NA    | 0     |
| 512-final-viral-combined_k141_173484 | [full]   | 2402 | No  | NA | 0 | 1 | Low-quality    | Genome-fragment | 1.71  | 0     |
| 52-final-viral-combined_k141_621813  | [full]   | 2402 | No  | NA | 0 | 0 | Low-quality    | Genome-fragment | 2.79  | 0     |
| 517-final-viral-combined_k141_205603 | [H2gene] | 1424 | No  | NA | 0 | 0 | Not-determined | Genome-fragment | NA    | 0     |
| 51-final-viral-combined_k141_194753  | [full]   | 2403 | No  | NA | 0 | 1 | Low-quality    | Genome-fragment | 0.26  | 0     |
| 59-final-viral-combined_k141_596211  | [full]   | 2404 | No  | NA | 0 | 1 | Low-quality    | Genome-fragment | 2.75  | 0     |
| 511-final-viral-combined_k141_194753 | [full]   | 2404 | No  | NA | 1 | 0 | Low-quality    | Genome-fragment | 5.78  | 0     |
| 511-final-viral-combined_k141_5604   | [full]   | 2404 | No  | NA | 0 | 0 | Low-quality    | Genome-fragment | 4.08  | 0     |
| 52-final-viral-combined_k141_26854   | [full]   | 2404 | No  | NA | 0 | 1 | Low-quality    | Genome-fragment | 3.51  | 0     |
| 57-final-viral-combined_k141_179188  | [full]   | 2404 | No  | NA | 0 | 1 | Low-quality    | Genome-fragment | 0.84  | 0     |
| 57-final-viral-combined_k141_211302  | [full]   | 2404 | No  | NA | 0 | 1 | Low-quality    | Genome-fragment | 1.9   | 0     |
| 517-final-viral-combined_k141_145530 | [full]   | 2404 | No  | NA | 0 | 1 | Low-quality    | Genome-fragment | 5.14  | 0     |
| 58-final-viral-combined_k141_1632    | [full]   | 2404 | No  | NA | 0 | 0 | Low-quality    | Genome-fragment | 4.06  | 0     |
| 511-final-viral-combined_k141_162465 | [full]   | 2405 | No  | NA | 2 | 0 | Low-quality    | Genome-fragment | 3.52  | 0     |
| 51-final-viral-combined_k141_19109   | [full]   | 2405 | No  | NA | 1 | 0 | Low-quality    | Genome-fragment | 1.84  | 0     |
| 51_k141_152391                       |          | 2405 | No  | NA | 0 | 0 | Low-quality    | Genome-fragment | 1.93  | 0     |
| 55-final-viral-combined_k141_116950  | [full]   | 2405 | No  | NA | 0 | 0 | Low-quality    | Genome-fragment | 0.84  | 0     |
| 517-k141_58064                       |          | 2405 | No  | NA | 0 | 1 | Low-quality    | Genome-fragment | 17.17 | 0     |
| 56-final-viral-combined_k141_80348   | [full]   | 2405 | No  | NA | 0 | 2 | Low-quality    | Genome-fragment | 2.32  | 0     |
| 59-final-viral-combined_k141_43522   | [full]   | 2406 | No  | NA | 0 | 1 | Low-quality    | Genome-fragment | 0.84  | 0     |
| 57-final-viral-combined_k141_237268  | [full]   | 2406 | No  | NA | 0 | 2 | Low-quality    | Genome-fragment | 1.64  | 0     |
| 57_k141_242278                       |          | 2406 | No  | NA | 0 | 0 | Low-quality    | Genome-fragment | 5.62  | 0     |
| 517-final-viral-combined_k141_48839  | [H2gene] | 1462 | No  | NA | 0 | 1 | Not-determined | Genome-fragment | NA    | 0     |
| 517-final-viral-combined_k141_239409 | [H2gene] | 2078 | No  | NA | 0 | 0 | Not-determined | Genome-fragment | NA    | 0     |
| 57_k141_40181                        |          | 2406 | No  | NA | 0 | 1 | Low-quality    | Genome-fragment | 0.21  | 0     |
| 52_k141_199142                       |          | 2406 | No  | NA | 0 | 0 | Low-quality    | Genome-fragment | 5.35  | 0     |
| 517-final-viral-combined_k141_261137 | [H2gene] | 1482 | No  | NA | 0 | 0 | Not-determined | Genome-fragment | NA    | 0     |
| 58_k141_190401                       |          | 2406 | No  | NA | 0 | 0 | Low-quality    | Genome-fragment | 2.87  | 0     |
| 517-final-viral-combined_k141_196257 | [H2gene] | 1563 | No  | NA | 0 | 0 | Not-determined | Genome-fragment | NA    | 0     |
| 517-final-viral-combined_k141_119334 | [H2gene] | 1430 | No  | NA | 0 | 0 | Not-determined | Genome-fragment | NA    | 0     |
| 517-final-viral-combined_k141_185501 | [H2gene] | 1069 | No  | NA | 0 | 0 | Not-determined | Genome-fragment | NA    | 0     |
| 51-final-viral-combined_k141_86124   | [full]   | 2407 | No  | NA | 0 | 0 | Low-quality    | Genome-fragment | 3.31  | 0     |
| 517-final-viral-combined_k141_80347  | [full]   | 2407 | No  | NA | 0 | 0 | Low-quality    | Genome-fragment | 1.36  | 0     |
| 52-final-viral-combined_k141_20163   | [full]   | 2407 | No  | NA | 1 | 0 | Low-quality    | Genome-fragment | 5.57  | 0     |
| 52-final-viral-combined_k141_134335  | [full]   | 2407 | No  | NA | 2 | 0 | Low-quality    | Genome-fragment | 4.94  | 0     |
| 517-final-viral-combined_k141_261870 | [H2gene] | 1115 | No  | NA | 0 | 0 | Not-determined | Genome-fragment | NA    | 0     |
| 517-final-viral-combined_k141_106991 | [H2gene] | 1057 | No  | NA | 0 | 0 | Not-determined | Genome-fragment | NA    | 0     |
| 51_k141_378141                       |          | 2408 | No  | NA | 0 | 2 | Low-quality    | Genome-fragment | 0.35  | 0     |
| 511-final-viral-combined_k141_42441  | [full]   | 2409 | No  | NA | 5 | 0 | Low-quality    | Genome-fragment | 6.28  | 0     |
| 57-final-viral-combined_k141_42655   | [full]   | 2409 | No  | NA | 0 | 0 | Low-quality    | Genome-fragment | 1.93  | 0     |
| 517-final-viral-combined_k141_197371 | [H2gene] | 1102 | No  | NA | 0 | 0 | Not-determined | Genome-fragment | NA    | 0     |
| 517-final-viral-combined_k141_186588 | [H2gene] | 2409 | No  | NA | 1 | 0 | Low-quality    | Genome-fragment | 5.21  | 0     |
| 54_k141_140700                       |          | 2409 | No  | NA | 0 | 0 | Low-quality    | Genome-fragment | 1.36  | 0     |
| 54_k141_71008                        |          | 2409 | No  | NA | 0 | 1 | Low-quality    | Genome-fragment | 4.67  | 0     |
| 58-final-viral-combined_k141_138918  | [full]   | 2409 | No  | NA | 0 | 0 | Low-quality    | Genome-fragment | 2.99  | 0     |
| 58-final-viral-combined_k141_47196   | [full]   | 2409 | No  | NA | 1 | 0 | Low-quality    | Genome-fragment | 5.52  | 0     |
| 517-final-viral-combined_k141_174990 | [H2gene] | 1021 | No  | NA | 0 | 1 | Not-determined | Genome-fragment | NA    | 0     |
| 511-final-viral-combined_k141_117861 | [full]   | 2410 | No  | NA | 0 | 2 | Low-quality    | Genome-fragment | 0.63  | 0     |



|                                            |       |     |    |   |   |                |                 |    |      |
|--------------------------------------------|-------|-----|----|---|---|----------------|-----------------|----|------|
| S17-k141_255655                            | 2525  | No  | NA | 0 | 0 | Not-determined | Genome-fragment | NA | 0    |
| S17-k141_31409                             | 1180  | No  | NA | 0 | 1 | Not-determined | Genome-fragment | NA | 0    |
| S17-k141_55608                             | 1480  | No  | NA | 0 | 0 | Not-determined | Genome-fragment | NA | 0    |
| S17-k141_222388                            | 2060  | No  | NA | 0 | 2 | Not-determined | Genome-fragment | NA | 0    |
| S17-k141_81                                | 3194  | No  | NA | 0 | 4 | Not-determined | Genome-fragment | NA | 0    |
| S5-final-viral-combined_k141_113440}[H2gme | 2418  | No  | NA | 1 | 0 | Low-quality    | Genome-fragment | NA | 4.58 |
| S17-k141_177819                            | 1487  | No  | NA | 0 | 2 | Not-determined | Genome-fragment | NA | 0    |
| S11-final-viral-combined_k141_6802}[H2gme  | 2419  | No  | NA | 2 | 0 | Low-quality    | Genome-fragment | NA | 5.66 |
| S7-final-viral-combined_k141_754594}[full  | 2419  | No  | NA | 1 | 0 | Low-quality    | Genome-fragment | NA | 5.55 |
| S17-k141_122331                            | 3305  | No  | NA | 0 | 1 | Not-determined | Genome-fragment | NA | 0    |
| S17-k141_144622                            | 1092  | No  | NA | 0 | 1 | Not-determined | Genome-fragment | NA | 0    |
| S17-k141_131464                            | 1333  | No  | NA | 0 | 0 | Not-determined | Genome-fragment | NA | 0    |
| S17-k141_144647                            | 1155  | No  | NA | 0 | 1 | Not-determined | Genome-fragment | NA | 0    |
| S17-final-viral-combined_k141_222056}[full | 2419  | No  | NA | 0 | 1 | Low-quality    | Genome-fragment | NA | 0.87 |
| S17-k141_11180                             | 3812  | No  | NA | 0 | 3 | Not-determined | Genome-fragment | NA | 0    |
| S17-k141_33147                             | 2176  | No  | NA | 0 | 1 | Not-determined | Genome-fragment | NA | 0    |
| S12-final-viral-combined_k141_7226}[full   | 2419  | No  | NA | 0 | 0 | Low-quality    | Genome-fragment | NA | 3.8  |
| S17-k141_144699                            | 2419  | No  | NA | 0 | 1 | Not-determined | Genome-fragment | NA | 0    |
| S17-k141_144716                            | 1251  | No  | NA | 0 | 1 | Not-determined | Genome-fragment | NA | 0    |
| S17-k141_78005                             | 1178  | No  | NA | 0 | 1 | Not-determined | Genome-fragment | NA | 0    |
| S17-k141_122424                            | 4386  | No  | NA | 0 | 0 | Not-determined | Genome-fragment | NA | 0    |
| S17-k141_100216                            | 1004  | No  | NA | 0 | 1 | Not-determined | Genome-fragment | NA | 0    |
| S17-k141_122430                            | 4646  | No  | NA | 0 | 1 | Not-determined | Genome-fragment | NA | 0    |
| S4-final-viral-combined_k141_135290}[full  | 2419  | No  | NA | 0 | 1 | Low-quality    | Genome-fragment | NA | 1.38 |
| S17-k141_188                               | 1226  | No  | NA | 0 | 1 | Not-determined | Genome-fragment | NA | 0    |
| S17-k141_177942                            | 1089  | No  | NA | 0 | 0 | Not-determined | Genome-fragment | NA | 0    |
| S17-k141_222495                            | 1638  | No  | NA | 0 | 3 | Not-determined | Genome-fragment | NA | 0    |
| S17-k141_111356                            | 7039  | No  | NA | 0 | 2 | Not-determined | Genome-fragment | NA | 0    |
| S1-final-viral-combined_k141_109563}[full  | 2420  | No  | NA | 0 | 2 | Low-quality    | Genome-fragment | NA | 1.1  |
| S17-k141_144760                            | 2183  | No  | NA | 0 | 2 | Not-determined | Genome-fragment | NA | 0    |
| S17-k141_78084                             | 1979  | No  | NA | 0 | 0 | Not-determined | Genome-fragment | NA | 0    |
| S17-k141_78091                             | 1361  | No  | NA | 0 | 1 | Not-determined | Genome-fragment | NA | 0    |
| S17-final-viral-combined_k141_178441}[full | 2420  | No  | NA | 0 | 0 | Low-quality    | Genome-fragment | NA | 5.4  |
| S17-k141_122487                            | 1756  | No  | NA | 0 | 1 | Not-determined | Genome-fragment | NA | 0    |
| S8-final-viral-combined_k141_130631}[full  | 2420  | No  | NA | 1 | 0 | Low-quality    | Genome-fragment | NA | 5.68 |
| S17-k141_144788                            | 1016  | No  | NA | 0 | 1 | Not-determined | Genome-fragment | NA | 0    |
| S17-k141_133687                            | 1002  | No  | NA | 0 | 1 | Not-determined | Genome-fragment | NA | 0    |
| S17-k141_22428                             | 1002  | No  | NA | 0 | 1 | Not-determined | Genome-fragment | NA | 0    |
| S12-final-viral-combined_k141_86596}[full  | 2421  | No  | NA | 0 | 1 | Low-quality    | Genome-fragment | NA | 1.53 |
| S17-k141_66941                             | 1035  | No  | NA | 0 | 1 | Not-determined | Genome-fragment | NA | 0    |
| S17-k141_33713                             | 1078  | No  | NA | 0 | 1 | Not-determined | Genome-fragment | NA | 0    |
| S12_k141_26571                             | 2421  | No  | NA | 0 | 1 | Low-quality    | Genome-fragment | NA | 0.43 |
| S2-final-viral-combined_k141_210006}[full  | 2421  | No  | NA | 1 | 0 | Low-quality    | Genome-fragment | NA | 3.12 |
| S17-k141_222608                            | 1840  | No  | NA | 0 | 2 | Not-determined | Genome-fragment | NA | 0    |
| S17-k141_255926                            | 1980  | No  | NA | 0 | 0 | Not-determined | Genome-fragment | NA | 0    |
| S17-k141_78189                             | 1289  | No  | NA | 0 | 0 | Not-determined | Genome-fragment | NA | 0    |
| S17-k141_100208                            | 1815  | No  | NA | 0 | 1 | Not-determined | Genome-fragment | NA | 0    |
| S17-k141_160892                            | 4195  | No  | NA | 0 | 3 | Not-determined | Genome-fragment | NA | 0    |
| S17-k141_122542                            | 2386  | No  | NA | 0 | 0 | Not-determined | Genome-fragment | NA | 0    |
| S17-k141_122562                            | 1701  | No  | NA | 0 | 0 | Not-determined | Genome-fragment | NA | 0    |
| S2-final-viral-combined_k141_86686}[full   | 2421  | No  | NA | 2 | 0 | Low-quality    | Genome-fragment | NA | 6.72 |
| S6-final-viral-combined_k141_51782}[full   | 2421  | No  | NA | 0 | 1 | Low-quality    | Genome-fragment | NA | 1.83 |
| S8-final-viral-combined_k141_210978}[full  | 2421  | No  | NA | 0 | 0 | Low-quality    | Genome-fragment | NA | 5.94 |
| S17-k141_233732                            | 1219  | No  | NA | 0 | 1 | Not-determined | Genome-fragment | NA | 0    |
| S17-k141_255988                            | 1948  | No  | NA | 0 | 2 | Not-determined | Genome-fragment | NA | 0    |
| S17-k141_78258                             | 1301  | No  | NA | 0 | 0 | Not-determined | Genome-fragment | NA | 0    |
| S17-k141_166916                            | 1194  | No  | NA | 0 | 0 | Not-determined | Genome-fragment | NA | 0    |
| S17-k141_44702                             | 3197  | No  | NA | 0 | 2 | Not-determined | Genome-fragment | NA | 0    |
| S11-final-viral-combined_k141_287144}[full | 2422  | No  | NA | 1 | 0 | Low-quality    | Genome-fragment | NA | 3.87 |
| S17-k141_122645                            | 3646  | No  | NA | 0 | 0 | Not-determined | Genome-fragment | NA | 0    |
| S17-k141_11418                             | 1619  | No  | NA | 0 | 0 | Not-determined | Genome-fragment | NA | 0    |
| S17-k141_122673                            | 1213  | No  | NA | 0 | 1 | Not-determined | Genome-fragment | NA | 0    |
| S17-k141_11438                             | 1411  | No  | NA | 0 | 2 | Not-determined | Genome-fragment | NA | 0    |
| S17-k141_166962                            | 2933  | No  | NA | 0 | 1 | Not-determined | Genome-fragment | NA | 0    |
| S17-k141_211614                            | 1128  | No  | NA | 0 | 1 | Not-determined | Genome-fragment | NA | 0    |
| S5-final-viral-combined_k141_154751}[full  | 2422  | No  | NA | 0 | 1 | Low-quality    | Genome-fragment | NA | 2.27 |
| S17-k141_145035                            | 1085  | No  | NA | 0 | 1 | Not-determined | Genome-fragment | NA | 0    |
| S4-final-viral-combined_k141_237941}[full  | 2422  | No  | NA | 1 | 0 | Low-quality    | Genome-fragment | NA | 2.3  |
| S8-final-viral-combined_k141_232595}[full  | 2422  | No  | NA | 1 | 0 | Low-quality    | Genome-fragment | NA | 2.83 |
| S17-k141_178088                            | 1298  | No  | NA | 0 | 1 | Not-determined | Genome-fragment | NA | 0    |
| S17-k141_44774                             | 1123  | No  | NA | 0 | 1 | Not-determined | Genome-fragment | NA | 0    |
| S17-k141_111618                            | 1884  | No  | NA | 0 | 2 | Not-determined | Genome-fragment | NA | 0    |
| S1-final-viral-combined_k141_298315}[full  | 2423  | No  | NA | 0 | 0 | Low-quality    | Genome-fragment | NA | 5.19 |
| S12-final-viral-combined_k141_380203}[full | 2423  | No  | NA | 0 | 0 | Low-quality    | Genome-fragment | NA | 3.58 |
| S17-k141_111639                            | 3002  | No  | NA | 0 | 2 | Not-determined | Genome-fragment | NA | 0    |
| S17-k141_111645                            | 3458  | No  | NA | 0 | 5 | Not-determined | Genome-fragment | NA | 0    |
| S17-k141_244988                            | 5087  | No  | NA | 0 | 1 | Not-determined | Genome-fragment | NA | 0    |
| S17-k141_33784                             | 2009  | No  | NA | 0 | 1 | Not-determined | Genome-fragment | NA | 0    |
| S12-final-viral-combined_k141_47125}[full  | 2423  | No  | NA | 3 | 0 | Low-quality    | Genome-fragment | NA | 5.09 |
| S17-k141_122728                            | 1041  | No  | NA | 0 | 2 | Not-determined | Genome-fragment | NA | 0    |
| S17-k141_155997                            | 1528  | No  | NA | 0 | 1 | Not-determined | Genome-fragment | NA | 0    |
| S17-k141_155999                            | 1896  | No  | NA | 0 | 0 | Not-determined | Genome-fragment | NA | 0    |
| S17-k141_211674                            | 1149  | No  | NA | 0 | 1 | Not-determined | Genome-fragment | NA | 0    |
| S11-final-viral-combined_k141_105795}[full | 2424  | No  | NA | 1 | 0 | Low-quality    | Genome-fragment | NA | 4.84 |
| S17-k141_78416                             | 1297  | No  | NA | 0 | 1 | Not-determined | Genome-fragment | NA | 0    |
| S11_k141_230377                            | 2425  | No  | NA | 0 | 0 | Low-quality    | Genome-fragment | NA | 2.58 |
| S17-k141_245029                            | 1240  | No  | NA | 0 | 0 | Not-determined | Genome-fragment | NA | 0    |
| S17-final-viral-combined_k141_206818}[full | 2425  | No  | NA | 0 | 1 | Low-quality    | Genome-fragment | NA | 1.72 |
| S2-final-viral-combined_k141_75323}[full   | 2425  | No  | NA | 0 | 0 | Low-quality    | Genome-fragment | NA | 5.69 |
| S17-k141_167100                            | 3442  | No  | NA | 0 | 3 | Not-determined | Genome-fragment | NA | 0    |
| S17-k141_189332                            | 1017  | No  | NA | 0 | 1 | Not-determined | Genome-fragment | NA | 0    |
| S17-k141_167114                            | 1621  | No  | NA | 0 | 1 | Not-determined | Genome-fragment | NA | 0    |
| S17-k141_167115                            | 1279  | No  | NA | 0 | 1 | Not-determined | Genome-fragment | NA | 0    |
| S7-final-viral-combined_k141_243467}[full  | 2426  | No  | NA | 2 | 0 | Low-quality    | Genome-fragment | NA | 5.89 |
| S17-k141_33855                             | 1707  | No  | NA | 1 | 0 | Low-quality    | Genome-fragment | NA | 6.99 |
| S17-final-viral-combined_k141_34632}[full  | 2426  | No  | NA | 2 | 0 | Low-quality    | Genome-fragment | NA | 6.99 |
| S17-k141_111725                            | 1166  | No  | NA | 0 | 2 | Not-determined | Genome-fragment | NA | 0    |
| S17-k141_158061                            | 1047  | No  | NA | 0 | 0 | Not-determined | Genome-fragment | NA | 0    |
| S17-k141_313822                            | 1673  | No  | NA | 0 | 0 | Not-determined | Genome-fragment | NA | 0    |
| S12-final-viral-combined_k141_241022}[full | 2426  | No  | NA | 0 | 2 | Low-quality    | Genome-fragment | NA | 1.71 |
| S17-k141_11531                             | 3662  | No  | NA | 0 | 3 | Not-determined | Genome-fragment | NA | 0    |
| S17-k141_256117                            | 1041  | No  | NA | 0 | 0 | Not-determined | Genome-fragment | NA | 0    |
| S17-k141_67391                             | 1827  | No  | NA | 0 | 0 | Not-determined | Genome-fragment | NA | 0    |
| S17-k141_133859                            | 1070  | No  | NA | 0 | 1 | Not-determined | Genome-fragment | NA | 0    |
| S17-k141_212909                            | 1217  | No  | NA | 0 | 0 | Not-determined | Genome-fragment | NA | 0    |
| S12_k141_401233                            | 2426  | No  | NA | 0 | 1 | Low-quality    | Genome-fragment | NA | 4.32 |
| S17-k141_67402                             | 3346  | No  | NA | 0 | 0 | Not-determined | Genome-fragment | NA | 0    |
| S8_k141_216184                             | 2426  | No  | NA | 0 | 2 | Low-quality    | Genome-fragment | NA | 0.9  |
| S17-k141_67407                             | 3841  | No  | NA | 0 | 0 | Not-determined | Genome-fragment | NA | 0    |
| S17-k141_67408                             | 1604  | No  | NA | 0 | 0 | Not-determined | Genome-fragment | NA | 0    |
| S9-final-viral-combined_k141_70044}[full   | 2427  | No  | NA | 1 | 0 | Low-quality    | Genome-fragment | NA | 4.52 |
| S1-final-viral-combined_k141_233767}[full  | 2427  | No  | NA | 1 | 0 | Low-quality    | Genome-fragment | NA | 3.67 |
| S17-k141_11562                             | 1464  | No  | NA | 0 | 1 | Not-determined | Genome-fragment | NA | 0    |
| S17-k141_598                               | 1850  | No  | NA | 0 | 1 | Not-determined | Genome-fragment | NA | 0    |
| S17-k141_200729                            | 1600  | No  | NA | 0 | 2 | Not-determined | Genome-fragment | NA | 0    |
| S17-final-viral-combined_k141_113892}[full | 2427  | No  | NA | 3 | 0 | Low-quality    | Genome-fragment | NA | 7.08 |
| S17-final-viral-combined_k141_81779}[full  | 2427  | No  | NA | 0 | 0 | Low-quality    | Genome-fragment | NA | 4.54 |
| S2-final-viral-combined_k141_6463}[full    | 2427  | No  | NA | 0 | 0 | Low-quality    | Genome-fragment | NA | 3.99 |
| S17-k141_200789                            | 1063  | No  | NA | 0 | 1 | Not-determined | Genome-fragment | NA | 0    |
| S17-k141_111881                            | 1472  | No  | NA | 0 | 0 | Not-determined | Genome-fragment | NA | 0    |
| S17-k141_89394                             | 1186  | No  | NA | 0 | 1 | Not-determined | Genome-fragment | NA | 0    |
| S17-k141_156169                            | 1386  | No  | NA | 0 | 0 | Not-determined | Genome-fragment | NA | 0    |
| S17-k141_211884                            | 3895  | No  | NA | 0 | 3 | Not-determined | Genome-fragment | NA | 0    |
| S17-k141_100511                            | 1457  | No  | NA | 0 | 1 | Not-determined | Genome-fragment | NA | 0    |
| S17-k141_111907                            | 1020  | No  | NA | 0 | 0 | Not-determined | Genome-fragment | NA | 0    |
| S17-k141_671                               | 1257  | No  | NA | 0 | 0 | Not-determined | Genome-fragment | NA | 0    |
| S2-final-viral-combined_k141_26998}[full   | 2427  | No  | NA | 0 | 2 | Low-quality    | Genome-fragment | NA | 3.11 |
| S17-k141_245148                            | 14120 | No  | NA | 0 | 2 | Not-determined | Genome-fragment | NA | 0    |
| S4-final-viral-combined_k141_25430}[H2gme  | 2427  | No  | NA | 1 | 0 | Low-quality    | Genome-fragment | NA | 3.95 |
| S17-k141_44906                             | 1804  | No  | NA | 0 | 1 | Not-determined | Genome-fragment | NA | 0    |
| S5-final-viral-combined_k141_730510}[full  | 2428  | No  | NA | 0 | 3 | Low-quality    | Genome-fragment | NA | 1.38 |
| S17-k141_189537                            | 3474  | No  | NA | 0 | 1 | Not-determined | Genome-fragment | NA | 0    |
| S17-k141_245177                            | 2273  | No  | NA | 0 | 1 | Not-determined | Genome-fragment | NA | 0    |
| S17-k141_178323                            | 2796  | No  | NA | 0 | 2 | Not-determined | Genome-fragment | NA | 0    |
| S17-k141_114149                            | 1091  | No  | NA | 0 | 1 | Not-determined | Genome-fragment | NA | 0    |
| S17-k141_134037                            | 6051  | No  | NA | 0 | 1 | Not-determined | Genome-fragment | NA | 0    |
| S17-k141_121043                            | 3373  | No  | NA | 0 | 2 | Not-determined | Genome-fragment | NA | 0    |
| S17-k141_145292                            | 1167  | No  | NA | 0 | 1 | Not-determined | Genome-fragment | NA | 0    |
| S17-k141_89524                             | 1064  | No  | NA | 0 | 1 | Not-determined | Genome-fragment | NA | 0    |
| S17-k141_89530                             | 2042  | No  | NA | 0 | 0 | Not-determined | Genome-fragment | NA | 0    |
| S17-k141_56211                             | 1039  | No  | NA | 0 | 0 | Not-determined | Genome-fragment | NA | 0    |
| S17-k141_213960                            | 1371  | No  | NA | 0 | 1 | Not-determined | Genome-fragment | NA | 0    |
| S17-k141_34122                             | 1627  | No  | NA | 0 | 1 | Not-determined | Genome-fragment | NA | 0    |
| S5-final-viral-combined_k141_82549}[full   | 2428  | Yes | NA | 1 | 1 |                |                 |    |      |



|                                            |       |     |      |   |   |                |                 |      |       |
|--------------------------------------------|-------|-----|------|---|---|----------------|-----------------|------|-------|
| S17-1411_167389                            | 1488  | No  | NA   | 0 | 0 | Not-determined | Genome-fragment | NA   | 0     |
| S17-1411_178583                            | 1060  | No  | NA   | 0 | 0 | Not-determined | Genome-fragment | NA   | 0     |
| S17-1411_189778                            | 2308  | No  | NA   | 0 | 0 | Not-determined | Genome-fragment | NA   | 0     |
| S17-1411_234063                            | 1620  | No  | NA   | 0 | 2 | Not-determined | Genome-fragment | NA   | 0     |
| S17-1411_256504                            | 1205  | No  | NA   | 0 | 0 | Not-determined | Genome-fragment | NA   | 0     |
| S17-1411_167469                            | 1396  | No  | NA   | 0 | 0 | Not-determined | Genome-fragment | NA   | 0     |
| S17-1411_100724                            | 3491  | No  | NA   | 0 | 2 | Not-determined | Genome-fragment | NA   | 0     |
| S17-1411_112183                            | 1974  | No  | NA   | 0 | 0 | Not-determined | Genome-fragment | NA   | 0     |
| S17-1411_234112                            | 1214  | No  | NA   | 0 | 0 | Not-determined | Genome-fragment | NA   | 0     |
| S17-1411_78976                             | 3692  | No  | NA   | 0 | 2 | Not-determined | Genome-fragment | NA   | 0     |
| S17-1411_100730                            | 1580  | No  | NA   | 1 | 0 | Not-determined | Genome-fragment | NA   | 0     |
| S3-final-viral-combined_k141_127282  full  | 2450  | No  | NA   | 0 | 0 | Low-quality    | Genome-fragment | 7.11 | 0     |
| S17-1411_78999                             | 1262  | No  | NA   | 0 | 2 | Not-determined | Genome-fragment | NA   | 0     |
| S17-1411_876                               | 6037  | No  | NA   | 0 | 3 | Not-determined | Genome-fragment | NA   | 0     |
| S17-1411_100741                            | 1116  | No  | NA   | 0 | 0 | Not-determined | Genome-fragment | NA   | 0     |
| S5-final-viral-combined_k141_596  full     | 2450  | No  | NA   | 0 | 1 | Low-quality    | Genome-fragment | 6.89 | 0     |
| S17-1411_56504                             | 1275  | No  | NA   | 0 | 0 | Not-determined | Genome-fragment | NA   | 0     |
| S17-1411_201204                            | 1229  | No  | NA   | 0 | 2 | Not-determined | Genome-fragment | NA   | 0     |
| S17-1411_45120                             | 2662  | No  | NA   | 0 | 2 | Not-determined | Genome-fragment | NA   | 0     |
| S17-1411_56518                             | 2185  | No  | NA   | 0 | 0 | Not-determined | Genome-fragment | NA   | 0     |
| S2_k141_56250                              | 2430  | No  | NA   | 0 | 0 | Low-quality    | Genome-fragment | 1.74 | 0     |
| S17-1411_223387                            | 5813  | No  | NA   | 0 | 3 | Not-determined | Genome-fragment | NA   | 0     |
| S17-1411_245460                            | 1458  | No  | NA   | 0 | 0 | Not-determined | Genome-fragment | NA   | 0     |
| S17-1411_178739                            | 4360  | No  | NA   | 0 | 4 | Not-determined | Genome-fragment | NA   | 0     |
| S8-final-viral-combined_k141_83385  full   | 2431  | No  | NA   | 3 | 0 | Low-quality    | Genome-fragment | 6.91 | 0     |
| S17-1411_123334                            | 1214  | No  | NA   | 0 | 2 | Not-determined | Genome-fragment | NA   | 0     |
| S12-final-viral-combined_k141_135833  full | 2431  | No  | NA   | 0 | 0 | Low-quality    | Genome-fragment | 2.95 | 0     |
| S4-final-viral-combined_k141_127794  full  | 2431  | No  | NA   | 0 | 1 | Low-quality    | Genome-fragment | 0.69 | 0     |
| S4-final-viral-combined_k141_48319  full   | 2431  | No  | NA   | 2 | 0 | Low-quality    | Genome-fragment | 4.58 | 0     |
| S17-1411_949                               | 8052  | No  | NA   | 0 | 0 | Not-determined | Genome-fragment | NA   | 0     |
| S17-1411_123367                            | 1298  | No  | NA   | 0 | 2 | Not-determined | Genome-fragment | NA   | 0     |
| S17-1411_201261                            | 1399  | No  | NA   | 0 | 2 | Not-determined | Genome-fragment | NA   | 0     |
| S17-1411_201271                            | 1025  | No  | NA   | 0 | 1 | Not-determined | Genome-fragment | NA   | 0     |
| S17-1411_56627                             | 3832  | No  | NA   | 0 | 5 | Not-determined | Genome-fragment | NA   | 0     |
| S17-1411_1017                              | 1291  | No  | NA   | 0 | 0 | Not-determined | Genome-fragment | NA   | 0     |
| S6_k141_89503                              | 2431  | No  | NA   | 1 | 0 | Low-quality    | Genome-fragment | 7.57 | 0     |
| S17-1411_89734                             | 1265  | No  | NA   | 0 | 0 | Not-determined | Genome-fragment | NA   | 0     |
| S17-1411_178771                            | 3485  | No  | NA   | 0 | 2 | Not-determined | Genome-fragment | NA   | 0     |
| S17-1411_167615                            | 2218  | No  | NA   | 0 | 1 | Not-determined | Genome-fragment | NA   | 0     |
| S17-1411_112373                            | 14552 | No  | NA   | 0 | 5 | Not-determined | Genome-fragment | NA   | 0     |
| S17-1411_121368                            | 10218 | No  | NA   | 0 | 8 | Not-determined | Genome-fragment | NA   | 0     |
| S17-1411_167628                            | 1000  | No  | NA   | 0 | 1 | Not-determined | Genome-fragment | NA   | 0     |
| S17-1411_189891                            | 1125  | No  | NA   | 0 | 1 | Not-determined | Genome-fragment | NA   | 0     |
| S17-1411_167629                            | 4873  | No  | NA   | 0 | 5 | Not-determined | Genome-fragment | NA   | 0     |
| S17-1411_234239                            | 2574  | No  | NA   | 0 | 0 | Not-determined | Genome-fragment | NA   | 0     |
| S17-1411_1013                              | 1455  | No  | NA   | 0 | 1 | Not-determined | Genome-fragment | NA   | 0     |
| S17-1411_234242                            | 1569  | No  | NA   | 0 | 0 | Not-determined | Genome-fragment | NA   | 0     |
| S17-1411_234243                            | 1227  | No  | NA   | 0 | 1 | Not-determined | Genome-fragment | NA   | 0     |
| S17-1411_234067                            | 1346  | No  | NA   | 0 | 2 | Not-determined | Genome-fragment | NA   | 0     |
| S17-1411_189908                            | 1002  | No  | NA   | 0 | 1 | Not-determined | Genome-fragment | NA   | 0     |
| S17-1411_256638                            | 1028  | No  | NA   | 0 | 1 | Not-determined | Genome-fragment | NA   | 0     |
| S17-1411_56694                             | 1065  | No  | NA   | 0 | 0 | Not-determined | Genome-fragment | NA   | 0     |
| S17-1411_167682                            | 1157  | No  | NA   | 0 | 2 | Not-determined | Genome-fragment | NA   | 0     |
| S17-1411_56699                             | 1735  | No  | NA   | 0 | 1 | Not-determined | Genome-fragment | NA   | 0     |
| S17-1411_123518                            | 3285  | No  | NA   | 0 | 2 | Not-determined | Genome-fragment | NA   | 0     |
| S17-1411_234316                            | 1432  | No  | NA   | 0 | 0 | Not-determined | Genome-fragment | NA   | 0     |
| S17-1411_256684                            | 2266  | No  | NA   | 0 | 1 | Not-determined | Genome-fragment | NA   | 0     |
| S17-1411_145694                            | 1105  | No  | NA   | 0 | 0 | Not-determined | Genome-fragment | NA   | 0     |
| S17-1411_123534                            | 1514  | No  | NA   | 0 | 2 | Not-determined | Genome-fragment | NA   | 0     |
| S17-1411_79240                             | 1003  | No  | NA   | 0 | 0 | Not-determined | Genome-fragment | NA   | 0     |
| S17-1411_201382                            | 1242  | No  | NA   | 0 | 1 | Not-determined | Genome-fragment | NA   | 0     |
| S17-1411_212424                            | 7079  | No  | NA   | 0 | 4 | Not-determined | Genome-fragment | NA   | 0     |
| S17-1411_112478                            | 1006  | No  | NA   | 0 | 1 | Not-determined | Genome-fragment | NA   | 0     |
| S17-1411_167762                            | 4912  | No  | NA   | 0 | 2 | Not-determined | Genome-fragment | NA   | 0     |
| S1_k141_62739                              | 2432  | Yes | 1524 | 0 | 1 | Low-quality    | Genome-fragment | 3.48 | 37.34 |
| S17-1411_167769                            | 1157  | No  | NA   | 0 | 2 | Not-determined | Genome-fragment | NA   | 0     |
| S17-1411_34486                             | 1174  | No  | NA   | 0 | 0 | Not-determined | Genome-fragment | NA   | 0     |
| S8-final-viral-combined_k141_204958  full  | 2432  | No  | NA   | 1 | 0 | Low-quality    | Genome-fragment | 6.82 | 0     |
| S17-1411_34496                             | 1093  | No  | NA   | 0 | 0 | Not-determined | Genome-fragment | NA   | 0     |
| S7-final-viral-combined_k141_234447  full  | 2432  | No  | NA   | 0 | 0 | Low-quality    | Genome-fragment | 1.53 | 0     |
| S17-1411_179041                            | 3439  | No  | NA   | 0 | 1 | Not-determined | Genome-fragment | NA   | 0     |
| S12-final-viral-combined_k141_64632  full  | 2432  | No  | NA   | 0 | 0 | Low-quality    | Genome-fragment | 5.3  | 0     |
| S17-1411_1179                              | 2669  | No  | NA   | 0 | 1 | Not-determined | Genome-fragment | NA   | 0     |
| S17-1411_79304                             | 1456  | No  | NA   | 0 | 1 | Not-determined | Genome-fragment | NA   | 0     |
| S17-1411_12151                             | 1583  | No  | NA   | 0 | 1 | Not-determined | Genome-fragment | NA   | 0     |
| S9-final-viral-combined_k141_12694  full   | 2433  | No  | NA   | 0 | 0 | Low-quality    | Genome-fragment | 5.25 | 0     |
| S17-1411_256725                            | 2199  | No  | NA   | 0 | 1 | Not-determined | Genome-fragment | NA   | 0     |
| S17-1411_204346                            | 1181  | No  | NA   | 0 | 1 | Not-determined | Genome-fragment | NA   | 0     |
| S17-1411_134455                            | 1315  | No  | NA   | 0 | 0 | Not-determined | Genome-fragment | NA   | 0     |
| S17-1411_68004                             | 1072  | No  | NA   | 0 | 1 | Not-determined | Genome-fragment | NA   | 0     |
| S17-1411_256740                            | 1112  | No  | NA   | 0 | 2 | Not-determined | Genome-fragment | NA   | 0     |
| S17-1411_134482                            | 3754  | No  | NA   | 0 | 0 | Not-determined | Genome-fragment | NA   | 0     |
| S17-1411_223731                            | 4512  | No  | NA   | 0 | 0 | Not-determined | Genome-fragment | NA   | 0     |
| S17-1411_212528                            | 1827  | No  | NA   | 0 | 0 | Not-determined | Genome-fragment | NA   | 0     |
| S17-1411_68063                             | 1198  | No  | NA   | 0 | 1 | Not-determined | Genome-fragment | NA   | 0     |
| S17-1411_212543                            | 1525  | No  | NA   | 0 | 1 | Not-determined | Genome-fragment | NA   | 0     |
| S17-1411_134534                            | 2222  | No  | NA   | 0 | 1 | Not-determined | Genome-fragment | NA   | 0     |
| S17-1411_23246                             | 1120  | No  | NA   | 0 | 1 | Not-determined | Genome-fragment | NA   | 0     |
| S17-1411_79396                             | 1009  | No  | NA   | 0 | 2 | Not-determined | Genome-fragment | NA   | 0     |
| S17-1411_179110                            | 4677  | No  | NA   | 0 | 3 | Not-determined | Genome-fragment | NA   | 0     |
| S17-1411_145862                            | 1288  | No  | NA   | 0 | 1 | Not-determined | Genome-fragment | NA   | 0     |
| S17-1411_101052                            | 1079  | No  | NA   | 0 | 1 | Not-determined | Genome-fragment | NA   | 0     |
| S17-1411_145886                            | 1039  | No  | NA   | 0 | 0 | Not-determined | Genome-fragment | NA   | 0     |
| S17-1411_89940                             | 1057  | No  | NA   | 0 | 1 | Not-determined | Genome-fragment | NA   | 0     |
| S17-1411_156986                            | 1096  | No  | NA   | 0 | 0 | Not-determined | Genome-fragment | NA   | 0     |
| S17-1411_201551                            | 2187  | No  | NA   | 0 | 2 | Not-determined | Genome-fragment | NA   | 0     |
| S17-1411_1304                              | 1798  | No  | NA   | 0 | 1 | Not-determined | Genome-fragment | NA   | 0     |
| S11-final-viral-combined_k141_60098  full  | 2433  | No  | NA   | 1 | 0 | Low-quality    | Genome-fragment | 1.82 | 0     |
| S17-1411_179148                            | 1499  | No  | NA   | 0 | 1 | Not-determined | Genome-fragment | NA   | 0     |
| S17-1411_256808                            | 1004  | No  | NA   | 0 | 0 | Not-determined | Genome-fragment | NA   | 0     |
| S17-final-viral-combined_k141_242256  full | 2433  | No  | NA   | 0 | 3 | Low-quality    | Genome-fragment | 1.2  | 0     |
| S17-1411_213634                            | 1113  | No  | NA   | 0 | 0 | Not-determined | Genome-fragment | NA   | 0     |
| S17-1411_245735                            | 3459  | No  | NA   | 0 | 4 | Not-determined | Genome-fragment | NA   | 0     |
| S17-1411_123759                            | 2064  | No  | NA   | 0 | 2 | Not-determined | Genome-fragment | NA   | 0     |
| S17-1411_201613                            | 1009  | No  | NA   | 0 | 1 | Not-determined | Genome-fragment | NA   | 0     |
| S17-1411_223836                            | 2481  | No  | NA   | 0 | 0 | Not-determined | Genome-fragment | NA   | 0     |
| S17-1411_223837                            | 6790  | No  | NA   | 0 | 0 | Not-determined | Genome-fragment | NA   | 0     |
| S17-1411_101133                            | 1394  | No  | NA   | 0 | 2 | Not-determined | Genome-fragment | NA   | 0     |
| S17-1411_45411                             | 1002  | No  | NA   | 0 | 0 | Not-determined | Genome-fragment | NA   | 0     |
| S17-1411_1342                              | 3723  | No  | NA   | 0 | 0 | Not-determined | Genome-fragment | NA   | 0     |
| S17-1411_190207                            | 1243  | No  | NA   | 0 | 1 | Not-determined | Genome-fragment | NA   | 0     |
| S17-1411_201658                            | 1364  | No  | NA   | 0 | 1 | Not-determined | Genome-fragment | NA   | 0     |
| S17-1411_223872                            | 1402  | No  | NA   | 0 | 1 | Not-determined | Genome-fragment | NA   | 0     |
| S17-1411_167892                            | 1539  | No  | NA   | 0 | 0 | Not-determined | Genome-fragment | NA   | 0     |
| S17-1411_217731                            | 1099  | No  | NA   | 0 | 1 | Not-determined | Genome-fragment | NA   | 0     |
| S17-1411_23347                             | 1462  | No  | NA   | 0 | 2 | Not-determined | Genome-fragment | NA   | 0     |
| S17-1411_79592                             | 1024  | No  | NA   | 0 | 0 | Not-determined | Genome-fragment | NA   | 0     |
| S17-1411_24690                             | 1828  | No  | NA   | 0 | 1 | Not-determined | Genome-fragment | NA   | 0     |
| S17-1411_223901                            | 4569  | No  | NA   | 0 | 0 | Not-determined | Genome-fragment | NA   | 0     |
| S17-1411_101194                            | 4102  | No  | NA   | 0 | 3 | Not-determined | Genome-fragment | NA   | 0     |
| S17-1411_201733                            | 3352  | No  | NA   | 0 | 1 | Not-determined | Genome-fragment | NA   | 0     |
| S17-1411_101201                            | 1589  | No  | NA   | 0 | 2 | Not-determined | Genome-fragment | NA   | 0     |
| S17-1411_256927                            | 4796  | No  | NA   | 0 | 1 | Not-determined | Genome-fragment | NA   | 0     |
| S8-final-viral-combined_k141_80885  full   | 2434  | No  | NA   | 0 | 0 | Low-quality    | Genome-fragment | 5.23 | 0     |
| S17-1411_156883                            | 4217  | No  | NA   | 0 | 2 | Not-determined | Genome-fragment | NA   | 0     |
| S17-1411_79649                             | 1126  | No  | NA   | 0 | 0 | Not-determined | Genome-fragment | NA   | 0     |
| S11-final-viral-combined_k141_64665  full  | 2435  | No  | NA   | 0 | 2 | Low-quality    | Genome-fragment | 0.99 | 0     |
| S7-final-viral-combined_k141_114153  full  | 2435  | No  | NA   | 0 | 0 | Low-quality    | Genome-fragment | 2.61 | 0     |
| S17-1411_145988                            | 1404  | No  | NA   | 0 | 1 | Not-determined | Genome-fragment | NA   | 0     |
| S17-1411_79675                             | 1146  | No  | NA   | 0 | 2 | Not-determined | Genome-fragment | NA   | 0     |
| S17-1411_90722                             | 2435  | No  | NA   | 1 | 0 | Low-quality    | Genome-fragment | 3.95 | 0     |
| S17-1411_101234                            | 2157  | No  | NA   | 0 | 2 | Not-determined | Genome-fragment | NA   | 0     |
| S17-1411_45515                             | 2574  | No  | NA   | 0 | 0 | Not-determined | Genome-fragment | NA   | 0     |
| S6-final-viral-combined_k141_132393  full  | 2435  | No  | NA   | 0 | 2 | Low-quality    | Genome-fragment | 1.2  | 0     |
| S17-1411_257003                            | 1693  | No  | NA   | 0 | 1 | Not-determined | Genome-fragment | NA   | 0     |
| S17-1411_167992                            | 5353  | No  | NA   | 0 | 1 | Not-determined | Genome-fragment | NA   | 0     |
| S17-final-viral-combined_k141_25771  full  | 2436  | No  | NA   | 0 | 2 | Low-quality    | Genome-fragment | 4.13 | 0     |
| S17-1411_146044                            | 1051  | No  | NA   | 0 | 2 | Not-determined | Genome-fragment | NA   | 0     |
| S17-1411_56963                             | 1074  | No  | NA   | 0 | 0 | Not-determined | Genome-fragment | NA   | 0     |
| S2-final-viral-combined_k141_79193  full   | 2436  | No  | NA   | 0 | 1 | Low-quality    | Genome-fragment | 2.15 | 0     |
| S17-1411_224031                            | 1248  | No  | NA   | 0 | 1 | Not-determined | Genome-fragment | NA   | 0     |
| S17-1411_79755                             | 5174  | No  | NA   | 0 | 2 | Not-determined | Genome-fragment | NA   | 0     |
| S2_k141_226862                             | 2436  | No  | NA   | 0 | 0 | Low-quality    | Genome-fragment | 5.75 | 0     |
| S17-1411_112753                            | 1046  | No  | NA   | 0 | 1 | Not-determined | Genome-fragment | NA   | 0     |
| S17-1411_1213                              |       |     |      |   |   |                |                 |      |       |



|                                      |            |       |    |    |    |    |                  |                 |       |   |
|--------------------------------------|------------|-------|----|----|----|----|------------------|-----------------|-------|---|
| S1-final-viral-combined_k141_3742311 | [full]     | 2437  | No | NA | 0  | 0  | Low-quality      | Genome-fragment | 6.23  | 0 |
| S12-final-viral-combined_k141_30890  | [full]     | 2437  | No | NA | 2  | 0  | Low-quality      | Genome-fragment | 5.68  | 0 |
| S17-k141_68586                       |            | 1086  | No | NA | 0  | 0  | Not-determined   | Genome-fragment | NA    | 0 |
| S17-k141_1761                        |            | 1214  | No | NA | 0  | 1  | Not-determined   | Genome-fragment | NA    | 0 |
| S17-k141_168290                      |            | 1390  | No | NA | 0  | 1  | Not-determined   | Genome-fragment | NA    | 0 |
| S17-k141_113009                      |            | 1446  | No | NA | 0  | 1  | Not-determined   | Genome-fragment | NA    | 0 |
| S17-k141_202093                      |            | 2134  | No | NA | 0  | 0  | Not-determined   | Genome-fragment | NA    | 0 |
| S17-k141_124242                      |            | 1310  | No | NA | 0  | 1  | Not-determined   | Genome-fragment | NA    | 0 |
| S5-final-viral-combined_k141_1187041 | [full]     | 2438  | No | NA | 2  | 0  | Low-quality      | Genome-fragment | 7.11  | 0 |
| S17-k141_202130                      |            | 4312  | No | NA | 0  | 2  | Not-determined   | Genome-fragment | NA    | 0 |
| S17-k141_113075                      |            | 1201  | No | NA | 0  | 1  | Not-determined   | Genome-fragment | NA    | 0 |
| S17-k141_257359                      |            | 6395  | No | NA | 0  | 5  | Not-determined   | Genome-fragment | NA    | 0 |
| S17-k141_245876                      |            | 1762  | No | NA | 0  | 0  | Not-determined   | Genome-fragment | NA    | 0 |
| S17-k141_224366                      |            | 6774  | No | NA | 0  | 4  | Not-determined   | Genome-fragment | NA    | 0 |
| S17-k141_199750                      |            | 1548  | No | NA | 0  | 0  | Not-determined   | Genome-fragment | NA    | 0 |
| S17-k141_45779                       |            | 1280  | No | NA | 0  | 3  | Not-determined   | Genome-fragment | NA    | 0 |
| S17-k141_146277                      |            | 1077  | No | NA | 0  | 1  | Not-determined   | Genome-fragment | NA    | 0 |
| S17-k141_257408                      |            | 1253  | No | NA | 0  | 0  | Not-determined   | Genome-fragment | NA    | 0 |
| S17-k141_113100                      |            | 1210  | No | NA | 0  | 1  | Not-determined   | Genome-fragment | NA    | 0 |
| S17-k141_57242                       |            | 3827  | No | NA | 0  | 3  | Not-determined   | Genome-fragment | NA    | 0 |
| S5-final-viral-combined_k141_178008  | [full]     | 2438  | No | NA | 1  | 0  | Low-quality      | Genome-fragment | 7.06  | 0 |
| S2-final-viral-combined_k141_74206   | [full]     | 2438  | No | NA | 0  | 1  | Low-quality      | Genome-fragment | 7.43  | 0 |
| S17-k141_113145                      |            | 1571  | No | NA | 0  | 1  | Not-determined   | Genome-fragment | NA    | 0 |
| S17-k141_124308                      |            | 22750 | No | NA | 12 | 0  | Medium-quality   | Genome-fragment | 70.13 | 0 |
| S17-k141_135212                      |            | 1127  | No | NA | 0  | 1  | Not-determined   | Genome-fragment | NA    | 0 |
| S17-k141_190809                      |            | 1683  | No | NA | 0  | 2  | Not-determined   | Genome-fragment | NA    | 0 |
| S17-k141_179642                      |            | 2073  | No | NA | 0  | 0  | Not-determined   | Genome-fragment | NA    | 0 |
| S17-k141_190826                      |            | 4729  | No | NA | 0  | 3  | Not-determined   | Genome-fragment | NA    | 0 |
| S17-k141_245987                      |            | 2179  | No | NA | 0  | 2  | Not-determined   | Genome-fragment | NA    | 0 |
| S17-k141_12426                       |            | 1098  | No | NA | 0  | 2  | Not-determined   | Genome-fragment | NA    | 0 |
| S17-k141_12435                       |            | 1896  | No | NA | 0  | 1  | Not-determined   | Genome-fragment | NA    | 0 |
| S17-k141_124368                      |            | 1586  | No | NA | 0  | 1  | Not-determined   | Genome-fragment | NA    | 0 |
| S17-k141_1860                        |            | 3852  | No | NA | 0  | 2  | Not-determined   | Genome-fragment | NA    | 0 |
| S6-final-viral-combined_k141_39375   | [full]     | 2438  | No | NA | 0  | 1  | Low-quality      | Genome-fragment | 2.47  | 0 |
| S17-k141_12474                       |            | 1884  | No | NA | 0  | 2  | Not-determined   | Genome-fragment | NA    | 0 |
| S17-k141_211249                      |            | 2365  | No | NA | 0  | 2  | Not-determined   | Genome-fragment | NA    | 0 |
| S17-k141_80076                       |            | 3549  | No | NA | 0  | 2  | Not-determined   | Genome-fragment | NA    | 0 |
| S17-k141_146364                      |            | 1215  | No | NA | 0  | 1  | Not-determined   | Genome-fragment | NA    | 0 |
| S17-k141_90484                       |            | 4909  | No | NA | 0  | 1  | Not-determined   | Genome-fragment | NA    | 0 |
| S17-k141_1907                        |            | 1090  | No | NA | 0  | 1  | Not-determined   | Genome-fragment | NA    | 0 |
| S17-k141_202366                      |            | 1573  | No | NA | 0  | 0  | Not-determined   | Genome-fragment | NA    | 0 |
| S17-k141_68761                       |            | 4050  | No | NA | 0  | 2  | Not-determined   | Genome-fragment | NA    | 0 |
| S7-final-viral-combined_k141_13006   | [full]     | 2439  | No | NA | 0  | 0  | Low-quality      | Genome-fragment | 3.91  | 0 |
| S12-final-viral-combined_k141_22480  | [full]     | 2439  | No | NA | 2  | 0  | Low-quality      | Genome-fragment | 6.71  | 0 |
| S12_k141_372279                      |            | 2439  | No | NA | 0  | 0  | Low-quality      | Genome-fragment | 6.49  | 0 |
| S17-k141_179748                      |            | 1478  | No | NA | 0  | 1  | Not-determined   | Genome-fragment | NA    | 0 |
| S6-final-viral-combined_k141_75064   | [full]     | 2440  | No | NA | 0  | 0  | Low-quality      | Genome-fragment | 4.41  | 0 |
| S17-k141_124445                      |            | 2132  | No | NA | 0  | 2  | Not-determined   | Genome-fragment | NA    | 0 |
| S17-k141_235055                      |            | 3796  | No | NA | 0  | 1  | Not-determined   | Genome-fragment | NA    | 0 |
| S8-final-viral-combined_k141_43149   | [full]     | 2440  | No | NA | 1  | 0  | Low-quality      | Genome-fragment | 3.96  | 0 |
| S17-k141_113341                      |            | 1123  | No | NA | 0  | 1  | Not-determined   | Genome-fragment | NA    | 0 |
| S8-final-viral-combined_k141_79618   | [full]     | 2440  | No | NA | 0  | 1  | Low-quality      | Genome-fragment | 1.44  | 0 |
| S17-k141_246046                      |            | 1094  | No | NA | 0  | 0  | Not-determined   | Genome-fragment | NA    | 0 |
| S17-k141_12525                       |            | 4298  | No | NA | 0  | 2  | Not-determined   | Genome-fragment | NA    | 0 |
| S17-k141_168638                      |            | 1284  | No | NA | 0  | 0  | Not-determined   | Genome-fragment | NA    | 0 |
| S17-k141_246059                      |            | 1975  | No | NA | 0  | 0  | Not-determined   | Genome-fragment | NA    | 0 |
| S11-final-viral-combined_k141_140968 | [full]     | 2441  | No | NA | 0  | 2  | Low-quality      | Genome-fragment | 2     | 0 |
| S17-k141_23932                       |            | 1185  | No | NA | 0  | 0  | Not-determined   | Genome-fragment | NA    | 0 |
| S17-k141_131439                      |            | 3096  | No | NA | 0  | 1  | Not-determined   | Genome-fragment | NA    | 0 |
| S17-k141_213401                      |            | 1310  | No | NA | 0  | 0  | Not-determined   | Genome-fragment | NA    | 0 |
| S17-k141_35304                       |            | 1848  | No | NA | 0  | 0  | Not-determined   | Genome-fragment | NA    | 0 |
| S17-k141_12149                       |            | 3645  | No | NA | 0  | 5  | Not-determined   | Genome-fragment | NA    | 0 |
| S17-k141_168704                      |            | 1999  | No | NA | 0  | 0  | Not-determined   | Genome-fragment | NA    | 0 |
| S17-k141_57469                       |            | 1082  | No | NA | 0  | 1  | Not-determined   | Genome-fragment | NA    | 0 |
| S17-k141_213455                      |            | 3577  | No | NA | 0  | 3  | Not-determined   | Genome-fragment | NA    | 0 |
| S17-k141_146525                      |            | 5830  | No | NA | 0  | 0  | Not-determined   | Genome-fragment | NA    | 0 |
| S17-k141_179866                      |            | 1375  | No | NA | 0  | 1  | Not-determined   | Genome-fragment | NA    | 0 |
| S17-k141_68901                       |            | 1017  | No | NA | 0  | 1  | Not-determined   | Genome-fragment | NA    | 0 |
| S17-k141_231214                      |            | 1417  | No | NA | 0  | 0  | Not-determined   | Genome-fragment | NA    | 0 |
| S17-k141_146584                      |            | 1107  | No | NA | 0  | 0  | Not-determined   | Genome-fragment | NA    | 0 |
| S17-k141_146596                      |            | 1160  | No | NA | 0  | 3  | Not-determined   | Genome-fragment | NA    | 0 |
| S11-final-viral-combined_k141_105807 | [full]     | 2441  | No | NA | 0  | 0  | Low-quality      | Genome-fragment | 4.78  | 0 |
| S17-k141_257633                      |            | 1243  | No | NA | 0  | 3  | Not-determined   | Genome-fragment | NA    | 0 |
| S17-k141_68964                       |            | 5702  | No | NA | 0  | 14 | Not-determined   | Genome-fragment | NA    | 0 |
| S17-k141_15589                       |            | 1669  | No | NA | 0  | 2  | Not-determined   | Genome-fragment | NA    | 0 |
| S17-k141_146627                      |            | 1416  | No | NA | 0  | 1  | Not-determined   | Genome-fragment | NA    | 0 |
| S11-final-viral-combined_k141_336399 | [full]     | 2441  | No | NA | 0  | 2  | Low-quality      | Genome-fragment | 3.21  | 0 |
| S2-final-viral-combined_k141_346383  | [12]genome | 2441  | No | NA | 2  | 0  | Low-quality      | Genome-fragment | 5.38  | 0 |
| S7-final-viral-combined_k141_114773  | [full]     | 2441  | No | NA | 0  | 1  | Low-quality      | Genome-fragment | 6.72  | 0 |
| S7-final-viral-combined_k141_3235    | [full]     | 2441  | No | NA | 1  | 0  | Low-quality      | Genome-fragment | 1.75  | 0 |
| S17-k141_113597                      |            | 1796  | No | NA | 0  | 0  | Not-determined   | Genome-fragment | NA    | 0 |
| S17-k141_101868                      |            | 1042  | No | NA | 0  | 1  | Not-determined   | Genome-fragment | NA    | 0 |
| S17-k141_124555                      |            | 1966  | No | NA | 0  | 1  | Not-determined   | Genome-fragment | NA    | 0 |
| S17-k141_124577                      |            | 1812  | No | NA | 0  | 1  | Not-determined   | Genome-fragment | NA    | 0 |
| S12-final-viral-combined_k141_1921   | [full]     | 2441  | No | NA | 0  | 1  | Low-quality      | Genome-fragment | 4.27  | 0 |
| S17-k141_57625                       |            | 1490  | No | NA | 0  | 1  | Not-determined   | Genome-fragment | NA    | 0 |
| S17-k141_124587                      |            | 1754  | No | NA | 0  | 1  | Not-determined   | Genome-fragment | NA    | 0 |
| S17-k141_80382                       |            | 3778  | No | NA | 0  | 1  | Not-determined   | Genome-fragment | NA    | 0 |
| S17-k141_191185                      |            | 1385  | No | NA | 0  | 1  | Not-determined   | Genome-fragment | NA    | 0 |
| S17-k141_90685                       |            | 3499  | No | NA | 0  | 3  | Not-determined   | Genome-fragment | NA    | 0 |
| S17-k141_235294                      |            | 11140 | No | NA | 0  | 2  | Not-determined   | Genome-fragment | NA    | 0 |
| S6_k141_73667                        |            | 2441  | No | NA | 0  | 2  | Low-quality      | Genome-fragment | 0.88  | 0 |
| S17-k141_224661                      |            | 6757  | No | NA | 0  | 3  | Not-determined   | Genome-fragment | NA    | 0 |
| S17-k141_224668                      |            | 1239  | No | NA | 0  | 0  | Not-determined   | Genome-fragment | NA    | 0 |
| S17-k141_46023                       |            | 3832  | No | NA | 0  | 4  | Not-determined   | Genome-fragment | NA    | 0 |
| S17-k141_235331                      |            | 1076  | No | NA | 0  | 2  | Not-determined   | Genome-fragment | NA    | 0 |
| S17-k141_113729                      |            | 1326  | No | NA | 0  | 0  | Not-determined   | Genome-fragment | NA    | 0 |
| S17-k141_218641                      |            | 8406  | No | NA | 0  | 2  | Not-determined   | Genome-fragment | NA    | 0 |
| S17-k141_46076                       |            | 1264  | No | NA | 0  | 1  | Not-determined   | Genome-fragment | NA    | 0 |
| S17-k141_202725                      |            | 3069  | No | NA | 0  | 2  | Not-determined   | Genome-fragment | NA    | 0 |
| S17-k141_168893                      |            | 2153  | No | NA | 0  | 1  | Not-determined   | Genome-fragment | NA    | 0 |
| S17-k141_124707                      |            | 1016  | No | NA | 0  | 1  | Not-determined   | Genome-fragment | NA    | 0 |
| S17-k141_213652                      |            | 5378  | No | NA | 0  | 2  | Not-determined   | Genome-fragment | NA    | 0 |
| S17-k141_24119                       |            | 5968  | No | NA | 0  | 6  | Not-determined   | Genome-fragment | NA    | 0 |
| S9_k141_75072                        |            | 2442  | No | NA | 1  | 0  | Low-quality      | Genome-fragment | 6.28  | 0 |
| S17-k141_157535                      |            | 4085  | No | NA | 0  | 1  | Not-determined   | Genome-fragment | NA    | 0 |
| S17-k141_12820                       |            | 4348  | No | NA | 0  | 2  | Not-determined   | Genome-fragment | NA    | 0 |
| S3-final-viral-combined_k141_37987   | [full]     | 2442  | No | NA | 0  | 1  | Low-quality      | Genome-fragment | 4.99  | 0 |
| S17-k141_80499                       |            | 1428  | No | NA | 0  | 0  | Not-determined   | Genome-fragment | NA    | 0 |
| S17-k141_168999                      |            | 1339  | No | NA | 0  | 1  | Not-determined   | Genome-fragment | NA    | 0 |
| S17-k141_69146                       |            | 1094  | No | NA | 0  | 0  | Not-determined   | Genome-fragment | NA    | 0 |
| S17-k141_46176                       |            | 1017  | No | NA | 0  | 1  | Not-determined   | Genome-fragment | NA    | 0 |
| S17-k141_113838                      |            | 1434  | No | NA | 0  | 2  | Not-determined   | Genome-fragment | NA    | 0 |
| S17-k141_146794                      |            | 2534  | No | NA | 0  | 0  | Not-determined   | Genome-fragment | NA    | 0 |
| S17-k141_113846                      |            | 1455  | No | NA | 0  | 5  | Not-determined   | Genome-fragment | NA    | 0 |
| S5-final-viral-combined_k141_92884   | [full]     | 2442  | No | NA | 0  | 1  | Low-quality      | Genome-fragment | 1.11  | 0 |
| S17-k141_224796                      |            | 1015  | No | NA | 0  | 1  | Not-determined   | Genome-fragment | NA    | 0 |
| S17-k141_113857                      |            | 1113  | No | NA | 0  | 0  | Not-determined   | Genome-fragment | NA    | 0 |
| S17-k141_202824                      |            | 1445  | No | NA | 0  | 1  | Not-determined   | Genome-fragment | NA    | 0 |
| S17-k141_124855                      |            | 2175  | No | NA | 0  | 1  | Not-determined   | Genome-fragment | NA    | 0 |
| S17-k141_24201                       |            | 10175 | No | NA | 0  | 4  | Not-determined   | Genome-fragment | NA    | 0 |
| S17-k141_191378                      |            | 6063  | No | NA | 0  | 4  | Not-determined   | Genome-fragment | NA    | 0 |
| S17-k141_180196                      |            | 6305  | No | NA | 0  | 2  | Not-determined   | Genome-fragment | NA    | 0 |
| S17-k141_57776                       |            | 2543  | No | NA | 0  | 1  | Not-determined   | Genome-fragment | NA    | 0 |
| S17-k141_121848                      |            | 7552  | No | NA | 0  | 5  | Not-determined   | Genome-fragment | NA    | 0 |
| S17-k141_12865                       |            | 2008  | No | NA | 0  | 2  | Not-determined   | Genome-fragment | NA    | 0 |
| S17-k141_124917                      |            | 1390  | No | NA | 0  | 1  | Not-determined   | Genome-fragment | NA    | 0 |
| S17-k141_244973                      |            | 4986  | No | NA | 0  | 1  | Not-determined   | Genome-fragment | NA    | 0 |
| S17-k141_113931                      |            | 5110  | No | NA | 0  | 2  | Not-determined   | Genome-fragment | NA    | 0 |
| S17-k141_35624                       |            | 1265  | No | NA | 0  | 1  | Not-determined   | Genome-fragment | NA    | 0 |
| S17-k141_257871                      |            | 5496  | No | NA | 0  | 4  | Not-determined   | Genome-fragment | NA    | 0 |
| S17-k141_90996                       |            | 4217  | No | NA | 0  | 2  | Not-determined   | Genome-fragment | NA    | 0 |
| S17-k141_191432                      |            | 1385  | No | NA | 0  | 1  | Not-determined   | Genome-fragment | NA    | 0 |
| S17-k141_202889                      |            | 1231  | No | NA | 0  | 1  | Not-determined   | Genome-fragment | NA    | 0 |
| S17-k141_235536                      |            | 30415 | No | NA | 0  | 6  | Medium-quality   | Genome-fragment | 87.71 | 0 |
| S17-k141_235537                      |            | 1802  | No | NA | 0  | 0  | Not-determined   | Genome-fragment | NA    | 0 |
| S17-k141_102077                      |            | 1011  | No | NA | 0  | 1  | Not-determined   | Genome-fragment | NA    | 0 |
| S17-k141_24288                       |            | 1374  | No | NA | 0  | 1  | Not-determined   | Genome-fragment | NA    | 0 |
| S17-k141_213798                      |            | 3403  | No | NA | 0  | 3  | Not-determined</ |                 |       |   |



|                                      |       |    |    |   |   |                |                 |    |      |
|--------------------------------------|-------|----|----|---|---|----------------|-----------------|----|------|
| S17-4141_191668                      | 17844 | No | NA | 0 | 4 | Not-determined | Genome-fragment | NA | 0    |
| S17-4141_191768                      | 1050  | No | NA | 0 | 2 | Not-determined | Genome-fragment | NA | 0    |
| S17-4141_80720                       | 1136  | No | NA | 0 | 1 | Not-determined | Genome-fragment | NA | 0    |
| S17-4141_80722                       | 2435  | No | NA | 0 | 1 | Not-determined | Genome-fragment | NA | 0    |
| S12-final-viral-combined_k141_283803 | 2443  | No | NA | 0 | 0 | Low-quality    | Genome-fragment | NA | 0    |
| S17-4141_180460                      | 1228  | No | NA | 0 | 0 | Not-determined | Genome-fragment | NA | 4.99 |
| S2_k141_51811                        | 2443  | No | NA | 4 | 0 | Low-quality    | Genome-fragment | NA | 5.7  |
| S17-4141_147211                      | 1872  | No | NA | 0 | 1 | Not-determined | Genome-fragment | NA | 0    |
| S17-4141_169406                      | 4919  | No | NA | 0 | 1 | Not-determined | Genome-fragment | NA | 0    |
| S17-4141_147211                      | 1068  | No | NA | 0 | 2 | Not-determined | Genome-fragment | NA | 0    |
| S17-4141_114349                      | 2647  | No | NA | 0 | 0 | Not-determined | Genome-fragment | NA | 0    |
| S17-4141_169499                      | 1529  | No | NA | 0 | 0 | Not-determined | Genome-fragment | NA | 0    |
| S17-4141_203214                      | 3311  | No | NA | 0 | 1 | Not-determined | Genome-fragment | NA | 0    |
| S17-4141_125140                      | 1104  | No | NA | 0 | 1 | Not-determined | Genome-fragment | NA | 0    |
| S17-4141_2510                        | 4608  | No | NA | 0 | 2 | Not-determined | Genome-fragment | NA | 0    |
| S8-final-viral-combined_k141_193956  | 2443  | No | NA | 2 | 0 | Low-quality    | Genome-fragment | NA | 4.47 |
| S17-4141_169481                      | 4707  | No | NA | 0 | 2 | Not-determined | Genome-fragment | NA | 0    |
| S17-4141_114393                      | 3378  | No | NA | 0 | 1 | Not-determined | Genome-fragment | NA | 0    |
| S17-4141_146672                      | 2849  | No | NA | 0 | 0 | Not-determined | Genome-fragment | NA | 0    |
| S17-4141_169494                      | 1100  | No | NA | 0 | 1 | Not-determined | Genome-fragment | NA | 0    |
| S17-4141_235920                      | 1534  | No | NA | 0 | 0 | Not-determined | Genome-fragment | NA | 0    |
| S17-4141_147278                      | 1230  | No | NA | 0 | 1 | Not-determined | Genome-fragment | NA | 0    |
| S17-4141_58042                       | 1337  | No | NA | 0 | 0 | Not-determined | Genome-fragment | NA | 0    |
| S11-final-viral-combined_k141_64714  | 2444  | No | NA | 0 | 0 | Low-quality    | Genome-fragment | NA | 6.59 |
| S17-4141_24482                       | 1215  | No | NA | 0 | 2 | Not-determined | Genome-fragment | NA | 0    |
| S17-4141_80918                       | 1255  | No | NA | 0 | 1 | Not-determined | Genome-fragment | NA | 0    |
| S17-4141_147305                      | 1292  | No | NA | 0 | 2 | Not-determined | Genome-fragment | NA | 0    |
| S17-4141_191742                      | 1250  | No | NA | 0 | 1 | Not-determined | Genome-fragment | NA | 0    |
| S12_k141_184114                      | 2444  | No | NA | 0 | 0 | Low-quality    | Genome-fragment | NA | 8.79 |
| S17-4141_114469                      | 7401  | No | NA | 0 | 5 | Not-determined | Genome-fragment | NA | 0    |
| S6-final-viral-combined_k141_44340   | 2444  | No | NA | 0 | 0 | Low-quality    | Genome-fragment | NA | 3.85 |
| S17-4141_246758                      | 3300  | No | NA | 0 | 1 | Not-determined | Genome-fragment | NA | 0    |
| S9_k141_34557                        | 2445  | No | NA | 3 | 0 | Low-quality    | Genome-fragment | NA | 1.6  |
| S17-4141_180616                      | 2121  | No | NA | 0 | 2 | Not-determined | Genome-fragment | NA | 0    |
| S17-4141_169565                      | 1520  | No | NA | 0 | 2 | Not-determined | Genome-fragment | NA | 0    |
| S17-4141_191824                      | 1527  | No | NA | 0 | 2 | Not-determined | Genome-fragment | NA | 0    |
| S17-4141_203344                      | 2736  | No | NA | 0 | 2 | Not-determined | Genome-fragment | NA | 0    |
| S17-4141_114515                      | 1554  | No | NA | 0 | 1 | Not-determined | Genome-fragment | NA | 0    |
| S17-4141_46432                       | 5736  | No | NA | 0 | 2 | Not-determined | Genome-fragment | NA | 0    |
| S17-4141_136257                      | 1178  | No | NA | 0 | 1 | Not-determined | Genome-fragment | NA | 0    |
| S17-4141_24561                       | 3417  | No | NA | 0 | 2 | Not-determined | Genome-fragment | NA | 0    |
| S17-4141_180770                      | 2270  | No | NA | 0 | 1 | Not-determined | Genome-fragment | NA | 0    |
| S17-4141_236092                      | 1439  | No | NA | 0 | 1 | Not-determined | Genome-fragment | NA | 0    |
| S1-final-viral-combined_k141_9952    | 2445  | No | NA | 2 | 0 | Low-quality    | Genome-fragment | NA | 5.14 |
| S12-final-viral-combined_k141_48890  | 2445  | No | NA | 0 | 0 | Low-quality    | Genome-fragment | NA | 5    |
| S17-4141_136324                      | 1057  | No | NA | 0 | 0 | Not-determined | Genome-fragment | NA | 0    |
| S17-4141_114589                      | 1496  | No | NA | 0 | 0 | Not-determined | Genome-fragment | NA | 0    |
| S17-4141_258552                      | 1443  | No | NA | 0 | 0 | Not-determined | Genome-fragment | NA | 0    |
| S17-4141_191865                      | 1273  | No | NA | 0 | 1 | Not-determined | Genome-fragment | NA | 0    |
| S17-4141_191870                      | 1345  | No | NA | 0 | 2 | Not-determined | Genome-fragment | NA | 0    |
| S17-4141_157988                      | 1210  | No | NA | 0 | 1 | Not-determined | Genome-fragment | NA | 0    |
| S17-4141_225362                      | 1011  | No | NA | 0 | 0 | Not-determined | Genome-fragment | NA | 0    |
| S17-4141_236115                      | 11662 | No | NA | 0 | 0 | Not-determined | Genome-fragment | NA | 0    |
| S2_k141_126888                       | 2445  | No | NA | 0 | 0 | Low-quality    | Genome-fragment | NA | 6.2  |
| S8-final-viral-combined_k141_82941   | 2445  | No | NA | 2 | 0 | Low-quality    | Genome-fragment | NA | 6.1  |
| S17-4141_215320                      | 1720  | No | NA | 0 | 2 | Not-determined | Genome-fragment | NA | 0    |
| S9-final-viral-combined_k141_108405  | 2446  | No | NA | 0 | 1 | Low-quality    | Genome-fragment | NA | 5.13 |
| S17-4141_125338                      | 6251  | No | NA | 0 | 5 | Not-determined | Genome-fragment | NA | 0    |
| S17-4141_225378                      | 1560  | No | NA | 0 | 0 | Not-determined | Genome-fragment | NA | 0    |
| S17-4141_69782                       | 1527  | No | NA | 0 | 2 | Not-determined | Genome-fragment | NA | 0    |
| S17-4141_191905                      | 1191  | No | NA | 0 | 0 | Not-determined | Genome-fragment | NA | 0    |
| S17-4141_158028                      | 1115  | No | NA | 0 | 1 | Not-determined | Genome-fragment | NA | 0    |
| S11-final-viral-combined_k141_289968 | 2446  | No | NA | 0 | 1 | Low-quality    | Genome-fragment | NA | 4.21 |
| S17-4141_2774                        | 1090  | No | NA | 0 | 1 | Not-determined | Genome-fragment | NA | 0    |
| S17-4141_136399                      | 1385  | No | NA | 0 | 2 | Not-determined | Genome-fragment | NA | 0    |
| S17-4141_180835                      | 1095  | No | NA | 0 | 2 | Not-determined | Genome-fragment | NA | 0    |
| S17-4141_246841                      | 3112  | No | NA | 0 | 1 | Not-determined | Genome-fragment | NA | 0    |
| S17-4141_180836                      | 4376  | No | NA | 0 | 3 | Not-determined | Genome-fragment | NA | 0    |
| S17-4141_114636                      | 1564  | No | NA | 0 | 1 | Not-determined | Genome-fragment | NA | 0    |
| S17-4141_58352                       | 6656  | No | NA | 0 | 4 | Not-determined | Genome-fragment | NA | 0    |
| S8-final-viral-combined_k141_195726  | 2446  | No | NA | 0 | 0 | Low-quality    | Genome-fragment | NA | 5.66 |
| S17-4141_36152                       | 1720  | No | NA | 0 | 0 | Not-determined | Genome-fragment | NA | 0    |
| S11-final-viral-combined_k141_309192 | 2447  | No | NA | 0 | 0 | Low-quality    | Genome-fragment | NA | 5.92 |
| S11-final-viral-combined_k141_243481 | 2447  | No | NA | 1 | 0 | Low-quality    | Genome-fragment | NA | 3.22 |
| S17-4141_59834                       | 1421  | No | NA | 0 | 0 | Not-determined | Genome-fragment | NA | 0    |
| S1-final-viral-combined_k141_101775  | 2447  | No | NA | 0 | 2 | Low-quality    | Genome-fragment | NA | 1.41 |
| S7-final-viral-combined_k141_5457    | 2447  | No | NA | 0 | 0 | Low-quality    | Genome-fragment | NA | 5.39 |
| S17-4141_225497                      | 1050  | No | NA | 0 | 1 | Not-determined | Genome-fragment | NA | 0    |
| S17-4141_81198                       | 7183  | No | NA | 0 | 2 | Not-determined | Genome-fragment | NA | 0    |
| S17-4141_147507                      | 1221  | No | NA | 0 | 0 | Not-determined | Genome-fragment | NA | 0    |
| S17-4141_258460                      | 1122  | No | NA | 0 | 1 | Not-determined | Genome-fragment | NA | 0    |
| S17-final-viral-combined_k141_20347  | 2447  | No | NA | 0 | 0 | Low-quality    | Genome-fragment | NA | 4.49 |
| S17-4141_203490                      | 10124 | No | NA | 0 | 1 | Not-determined | Genome-fragment | NA | 0    |
| S17-4141_81264                       | 4924  | No | NA | 0 | 3 | Not-determined | Genome-fragment | NA | 0    |
| S17-4141_236216                      | 1129  | No | NA | 0 | 1 | Not-determined | Genome-fragment | NA | 0    |
| S17-4141_246987                      | 3029  | No | NA | 0 | 0 | Not-determined | Genome-fragment | NA | 0    |
| S17-4141_236219                      | 6982  | No | NA | 0 | 5 | Not-determined | Genome-fragment | NA | 0    |
| S17-4141_91281                       | 3296  | No | NA | 0 | 2 | Not-determined | Genome-fragment | NA | 0    |
| S17-4141_191044                      | 2505  | No | NA | 0 | 1 | Not-determined | Genome-fragment | NA | 0    |
| S17-4141_258492                      | 1150  | No | NA | 0 | 1 | Not-determined | Genome-fragment | NA | 0    |
| S17-4141_91285                       | 1756  | No | NA | 0 | 1 | Not-determined | Genome-fragment | NA | 0    |
| S17-4141_191053                      | 1235  | No | NA | 0 | 1 | Not-determined | Genome-fragment | NA | 0    |
| S17-4141_236237                      | 2762  | No | NA | 0 | 0 | Not-determined | Genome-fragment | NA | 0    |
| S17-4141_225545                      | 1063  | No | NA | 0 | 0 | Not-determined | Genome-fragment | NA | 0    |
| S17-4141_147578                      | 2763  | No | NA | 0 | 0 | Not-determined | Genome-fragment | NA | 0    |
| S17-4141_114871                      | 1756  | No | NA | 0 | 1 | Not-determined | Genome-fragment | NA | 0    |
| S17-4141_81301                       | 5752  | No | NA | 0 | 1 | Not-determined | Genome-fragment | NA | 0    |
| S17-4141_214620                      | 2648  | No | NA | 0 | 2 | Not-determined | Genome-fragment | NA | 0    |
| S12-final-viral-combined_k141_180671 | 2447  | No | NA | 1 | 0 | Low-quality    | Genome-fragment | NA | 4.48 |
| S17-4141_214630                      | 5613  | No | NA | 0 | 1 | Not-determined | Genome-fragment | NA | 0    |
| S2-final-viral-combined_k141_189995  | 2447  | No | NA | 0 | 0 | Low-quality    | Genome-fragment | NA | 4.84 |
| S17-4141_69920                       | 7412  | No | NA | 0 | 0 | Not-determined | Genome-fragment | NA | 0    |
| S17-4141_125616                      | 1348  | No | NA | 0 | 1 | Not-determined | Genome-fragment | NA | 0    |
| S17-4141_169816                      | 3395  | No | NA | 0 | 0 | Not-determined | Genome-fragment | NA | 0    |
| S17-final-viral-combined_k141_92112  | 2448  | No | NA | 0 | 1 | Low-quality    | Genome-fragment | NA | 3.86 |
| S17-4141_258580                      | 1171  | No | NA | 0 | 2 | Not-determined | Genome-fragment | NA | 0    |
| S17-4141_58381                       | 1080  | No | NA | 0 | 2 | Not-determined | Genome-fragment | NA | 0    |
| S17-final-viral-combined_k141_127955 | 2448  | No | NA | 1 | 0 | Low-quality    | Genome-fragment | NA | 3.59 |
| S17-4141_69937                       | 1389  | No | NA | 0 | 0 | Not-determined | Genome-fragment | NA | 0    |
| S17-4141_125703                      | 1947  | No | NA | 0 | 3 | Not-determined | Genome-fragment | NA | 0    |
| S17-4141_81377                       | 4195  | No | NA | 0 | 0 | Not-determined | Genome-fragment | NA | 0    |
| S17-4141_236295                      | 1131  | No | NA | 0 | 0 | Not-determined | Genome-fragment | NA | 0    |
| S17-4141_236297                      | 4941  | No | NA | 0 | 3 | Not-determined | Genome-fragment | NA | 0    |
| S17-4141_191223                      | 1209  | No | NA | 0 | 0 | Not-determined | Genome-fragment | NA | 0    |
| S12-final-viral-combined_k141_169954 | 2448  | No | NA | 0 | 0 | Low-quality    | Genome-fragment | NA | 5.12 |
| S17-4141_102923                      | 1115  | No | NA | 0 | 1 | Not-determined | Genome-fragment | NA | 0    |
| S17-4141_236309                      | 1057  | No | NA | 0 | 1 | Not-determined | Genome-fragment | NA | 0    |
| S17-4141_214716                      | 2363  | No | NA | 0 | 1 | Not-determined | Genome-fragment | NA | 0    |
| S17-4141_147686                      | 1100  | No | NA | 0 | 1 | Not-determined | Genome-fragment | NA | 0    |
| S17-4141_181232                      | 1566  | No | NA | 0 | 0 | Not-determined | Genome-fragment | NA | 0    |
| S17-4141_24974                       | 1178  | No | NA | 0 | 1 | Not-determined | Genome-fragment | NA | 0    |
| S2_k141_89525                        | 2448  | No | NA | 1 | 0 | Low-quality    | Genome-fragment | NA | 2.55 |
| S3-final-viral-combined_k141_35588   | 2449  | No | NA | 0 | 0 | Low-quality    | Genome-fragment | NA | 4.18 |
| S2-final-viral-combined_k141_121663  | 2449  | No | NA | 0 | 0 | Low-quality    | Genome-fragment | NA | 2.4  |
| S17-4141_125745                      | 5264  | No | NA | 0 | 0 | Not-determined | Genome-fragment | NA | 0    |
| S2-final-viral-combined_k141_9599    | 2449  | No | NA | 0 | 1 | Low-quality    | Genome-fragment | NA | 1.84 |
| S17-4141_70079                       | 1070  | No | NA | 0 | 1 | Not-determined | Genome-fragment | NA | 0    |
| S17-4141_81520                       | 1276  | No | NA | 0 | 1 | Not-determined | Genome-fragment | NA | 0    |
| S17-4141_81527                       | 5511  | No | NA | 0 | 2 | Not-determined | Genome-fragment | NA | 0    |
| S17-4141_1225759                     | 2148  | No | NA | 0 | 1 | Not-determined | Genome-fragment | NA | 0    |
| S17-4141_36491                       | 5378  | No | NA | 0 | 6 | Not-determined | Genome-fragment | NA | 0    |
| S5_k141_194704                       | 2450  | No | NA | 1 | 0 | Low-quality    | Genome-fragment | NA | 5.51 |
| S17-4141_147870                      | 1442  | No | NA | 0 | 0 | Not-determined | Genome-fragment | NA | 0    |
| S17-4141_191245                      | 1122  | No | NA | 0 | 2 | Not-determined | Genome-fragment | NA | 0    |
| S17-4141_147904                      | 1757  | No | NA | 0 | 2 | Not-determined | Genome-fragment | NA | 0    |
| S17-4141_70133                       | 3012  | No | NA | 0 | 2 | Not-determined | Genome-fragment | NA | 0    |
| S17-4141_136878                      | 3543  | No | NA | 0 | 1 | Not-determined | Genome-fragment | NA | 0    |
| S7-final-viral-combined_k141_86528   | 2450  | No | NA | 0 | 1 | Low-quality    | Genome-fragment | NA | 3.54 |
| S17-4141_158283                      | 4769  | No | NA | 0 | 4 | Not-determined | Genome-fragment | NA | 0    |
| S17-4141_214850                      | 1044  | No | NA | 0 | 2 | Not-determined | Genome-fragment | NA | 0    |
| S17-4141_125885                      | 1026  | No | NA | 0 | 2 | Not-determined | Genome-fragment | NA | 0    |
| S17-4141_136888                      | 3717  | No | NA | 0 | 1 | Not-determined | Genome-fragment | NA | 0    |
| S12-final-viral-combined_k141_197983 | 2450  | No | NA | 1 | 0 | Low-quality    | Genome-fragment | NA | 2.63 |
| S11_k141_267127                      | 2451  | No | NA | 0 | 1 | Low-quality    | Genome-fragment | NA | 2.24 |
|                                      |       |    |    |   |   |                |                 |    |      |



|                                             |       |     |    |      |   |                |                 |      |       |
|---------------------------------------------|-------|-----|----|------|---|----------------|-----------------|------|-------|
| S4_k141_11211                               | 2455  | No  | NA | 1    | 0 | Low-quality    | Genome-fragment | 1.35 | 0     |
| S17-k141_58792                              | 3119  | No  | NA | 1    | 0 | Not-determined | Genome-fragment | NA   | 0     |
| S2-final-viral-combined_k141_97380}[full    | 2456  | No  | NA | 1    | 0 | Low-quality    | Genome-fragment | 6.05 | 0     |
| S17-k141_58804                              | 1058  | No  | NA | 0    | 1 | Not-determined | Genome-fragment | NA   | 0     |
| S17-k141_192073                             | 5347  | No  | NA | 0    | 9 | Not-determined | Genome-fragment | NA   | 0     |
| S17-k141_193090                             | 2309  | No  | NA | 0    | 1 | Not-determined | Genome-fragment | NA   | 0     |
| S17-k141_226017                             | 1400  | No  | NA | 0    | 1 | Not-determined | Genome-fragment | NA   | 0     |
| S17-k141_236674                             | 1763  | No  | NA | 0    | 0 | Not-determined | Genome-fragment | NA   | 0     |
| S17-k141_193099                             | 1183  | No  | NA | 0    | 2 | Not-determined | Genome-fragment | NA   | 0     |
| S17-k141_126120                             | 22102 | No  | NA | 0    | 1 | Not-determined | Genome-fragment | NA   | 0     |
| S17-k141_226043                             | 2710  | No  | NA | 0    | 0 | Not-determined | Genome-fragment | NA   | 0     |
| S17-k141_81861                              | 1217  | No  | NA | 0    | 1 | Not-determined | Genome-fragment | NA   | 0     |
| S17-k141_137104                             | 1277  | No  | NA | 0    | 0 | Not-determined | Genome-fragment | NA   | 0     |
| S17-k141_36727                              | 1702  | No  | NA | 0    | 1 | Not-determined | Genome-fragment | NA   | 0     |
| S17-k141_103301                             | 2092  | No  | NA | 0    | 2 | Not-determined | Genome-fragment | NA   | 0     |
| S17-k141_170215                             | 3572  | No  | NA | 0    | 3 | Not-determined | Genome-fragment | NA   | 0     |
| S17-k141_192742                             | 1377  | No  | NA | 0    | 2 | Not-determined | Genome-fragment | NA   | 0     |
| S17-k141_3503                               | 1010  | No  | NA | 0    | 0 | Not-determined | Genome-fragment | NA   | 0     |
| S17-k141_121741                             | 1449  | No  | NA | 0    | 0 | Not-determined | Genome-fragment | NA   | 0     |
| S17-k141_36757                              | 3682  | No  | NA | 0    | 3 | Not-determined | Genome-fragment | NA   | 0     |
| S17-k141_103334                             | 1029  | No  | NA | 0    | 0 | Not-determined | Genome-fragment | NA   | 0     |
| S17-k141_247460                             | 1661  | No  | NA | 0    | 0 | Not-determined | Genome-fragment | NA   | 0     |
| S17-k141_148142                             | 3769  | No  | NA | 0    | 1 | Not-determined | Genome-fragment | NA   | 0     |
| S8_k141_227793                              | 2456  | No  | NA | 1    | 0 | Low-quality    | Genome-fragment | 1.84 | 0     |
| S17-k141_3538                               | 1562  | No  | NA | 0    | 2 | Not-determined | Genome-fragment | NA   | 0     |
| S7-final-viral-combined_k141_90183}[full    | 2457  | No  | NA | 0    | 0 | Low-quality    | Genome-fragment | 4.4  | 0     |
| S17-k141_70495                              | 1120  | No  | NA | 0    | 0 | Not-determined | Genome-fragment | NA   | 0     |
| S17-k141_25455                              | 1224  | No  | NA | 0    | 1 | Not-determined | Genome-fragment | NA   | 0     |
| S7-final-viral-combined_k141_179470}[H2gene | 2457  | No  | NA | 1    | 0 | Low-quality    | Genome-fragment | 6.82 | 0     |
| S17-k141_204094                             | 1126  | No  | NA | 0    | 0 | Not-determined | Genome-fragment | NA   | 0     |
| S17-k141_115652                             | 1177  | No  | NA | 0    | 0 | Not-determined | Genome-fragment | NA   | 0     |
| S17-k141_70559                              | 1826  | No  | NA | 0    | 1 | Not-determined | Genome-fragment | NA   | 0     |
| S17-k141_215296                             | 1054  | No  | NA | 0    | 1 | Not-determined | Genome-fragment | NA   | 0     |
| S17-k141_148227                             | 1922  | No  | NA | 0    | 1 | Not-determined | Genome-fragment | NA   | 0     |
| S17-k141_70573                              | 1470  | No  | NA | 0    | 1 | Not-determined | Genome-fragment | NA   | 0     |
| S17-k141_193861                             | 3200  | No  | NA | 0    | 1 | Not-determined | Genome-fragment | NA   | 0     |
| S17-k141_170285                             | 3228  | No  | NA | 0    | 2 | Not-determined | Genome-fragment | NA   | 0     |
| S17-k141_170289                             | 1466  | No  | NA | 0    | 0 | Not-determined | Genome-fragment | NA   | 0     |
| S17-k141_170294                             | 1102  | No  | NA | 0    | 1 | Not-determined | Genome-fragment | NA   | 0     |
| S17-k141_70627                              | 1503  | No  | NA | 0    | 1 | Not-determined | Genome-fragment | NA   | 0     |
| S17-k141_236757                             | 1095  | No  | NA | 0    | 2 | Not-determined | Genome-fragment | NA   | 0     |
| S17-k141_25325                              | 1584  | No  | NA | 0    | 0 | Not-determined | Genome-fragment | NA   | 0     |
| S17-k141_103487                             | 1100  | No  | NA | 0    | 1 | Not-determined | Genome-fragment | NA   | 0     |
| S17-k141_258933                             | 1177  | No  | NA | 0    | 0 | Not-determined | Genome-fragment | NA   | 0     |
| S17-k141_247545                             | 1679  | No  | NA | 0    | 1 | Not-determined | Genome-fragment | NA   | 0     |
| S12-final-viral-combined_k141_349617}[full  | 2457  | No  | NA | 1    | 0 | Low-quality    | Genome-fragment | 6.44 | 0     |
| S17-k141_70676                              | 3928  | No  | NA | 0    | 3 | Not-determined | Genome-fragment | NA   | 0     |
| S17-k141_81190                              | 19438 | No  | NA | 0    | 9 | Not-determined | Genome-fragment | NA   | 0     |
| S17-k141_70719                              | 1540  | No  | NA | 0    | 0 | Not-determined | Genome-fragment | NA   | 0     |
| S17-k141_258967                             | 3831  | No  | NA | 0    | 6 | Not-determined | Genome-fragment | NA   | 0     |
| S4-final-viral-combined_k141_111316}[full   | 2457  | No  | NA | 2    | 0 | Low-quality    | Genome-fragment | 5.91 | 0     |
| S17-k141_137201                             | 2126  | No  | NA | 0    | 1 | Not-determined | Genome-fragment | NA   | 0     |
| S8-final-viral-combined_k141_216552}[full   | 2457  | No  | NA | 0    | 1 | Low-quality    | Genome-fragment | 0.86 | 0     |
| S17-k141_247580                             | 1276  | No  | NA | 0    | 2 | Not-determined | Genome-fragment | NA   | 0     |
| S8-final-viral-combined_k141_203867}[full   | 2457  | No  | NA | 2    | 0 | Low-quality    | Genome-fragment | 4.76 | 0     |
| S1-final-viral-combined_k141_292966}[full   | 2458  | No  | NA | 0    | 0 | Low-quality    | Genome-fragment | 5.07 | 0     |
| S17-k141_36867                              | 1629  | No  | NA | 0    | 1 | Not-determined | Genome-fragment | NA   | 0     |
| S17-k141_25600                              | 1154  | No  | NA | 0    | 1 | Not-determined | Genome-fragment | NA   | 0     |
| S17-k141_226261                             | 1005  | No  | NA | 0    | 1 | Not-determined | Genome-fragment | NA   | 0     |
| S17-k141_193000                             | 1399  | No  | NA | 0    | 2 | Not-determined | Genome-fragment | NA   | 0     |
| S17-k141_193003                             | 1087  | No  | NA | 0    | 0 | Not-determined | Genome-fragment | NA   | 0     |
| S17-k141_70919                              | 2218  | No  | NA | 0    | 3 | Not-determined | Genome-fragment | NA   | 0     |
| S17-k141_70820                              | 1070  | No  | NA | 0    | 1 | Not-determined | Genome-fragment | NA   | 0     |
| S17-final-viral-combined_k141_46087}[full   | 2458  | No  | NA | 0    | 0 | Low-quality    | Genome-fragment | 6.62 | 0     |
| S17-k141_25644                              | 1729  | No  | NA | 0    | 1 | Not-determined | Genome-fragment | NA   | 0     |
| S17-k141_204277                             | 2576  | No  | NA | 0    | 2 | Not-determined | Genome-fragment | NA   | 0     |
| S17-k141_14148                              | 3405  | No  | NA | 0    | 2 | Not-determined | Genome-fragment | NA   | 0     |
| S8-final-viral-combined_k141_70304}[full    | 2458  | No  | NA | 0    | 0 | Low-quality    | Genome-fragment | 1.47 | 0     |
| S17-k141_91878                              | 1028  | No  | NA | 0    | 1 | Not-determined | Genome-fragment | NA   | 0     |
| S8_k141_237035                              | 2458  | No  | NA | 1    | 0 | Low-quality    | Genome-fragment | 1.89 | 0     |
| S5-final-viral-combined_k141_151530}[full   | 2459  | No  | NA | 0    | 1 | Low-quality    | Genome-fragment | 1.14 | 0     |
| S17-k141_14199                              | 2186  | No  | NA | 0    | 1 | Not-determined | Genome-fragment | NA   | 0     |
| S17-k141_36903                              | 21036 | No  | NA | 0    | 2 | Not-determined | Genome-fragment | NA   | 0     |
| S5-final-viral-combined_k141_8855}[full     | 2459  | No  | NA | 1    | 0 | Low-quality    | Genome-fragment | 5.18 | 0     |
| S17-k141_126327                             | 1780  | No  | NA | 0    | 2 | Not-determined | Genome-fragment | NA   | 0     |
| S17-k141_91896                              | 1185  | No  | NA | 0    | 1 | Not-determined | Genome-fragment | NA   | 0     |
| S17-k141_204367                             | 2292  | No  | NA | 0    | 2 | Not-determined | Genome-fragment | NA   | 0     |
| S17-k141_59101                              | 3274  | No  | NA | 0    | 3 | Not-determined | Genome-fragment | NA   | 0     |
| S12-final-viral-combined_k141_198556}[full  | 2459  | No  | NA | 0    | 1 | Low-quality    | Genome-fragment | 1.17 | 0     |
| S12_k141_398446                             | 2459  | No  | NA | 0    | 1 | Low-quality    | Genome-fragment | 8.52 | 0     |
| S11-final-viral-combined_k141_39002}[full   | 2460  | Yes | NA | 1837 | 1 | Low-quality    | Genome-fragment | 1.41 | 25.33 |
| S17-final-viral-combined_k141_56677}[full   | 2460  | No  | NA | 0    | 0 | Low-quality    | Genome-fragment | 5.85 | 0     |
| S17-k141_103646                             | 1855  | No  | NA | 0    | 2 | Not-determined | Genome-fragment | NA   | 0     |
| S17-k141_126346                             | 1099  | No  | NA | 0    | 1 | Not-determined | Genome-fragment | NA   | 0     |
| S17-k141_126382                             | 1151  | No  | NA | 0    | 0 | Not-determined | Genome-fragment | NA   | 0     |
| S17-k141_103651                             | 1253  | No  | NA | 0    | 2 | Not-determined | Genome-fragment | NA   | 0     |
| S17-k141_148486                             | 1992  | No  | NA | 0    | 1 | Not-determined | Genome-fragment | NA   | 0     |
| S17-final-viral-combined_k141_82120}[full   | 2460  | No  | NA | 0    | 2 | Low-quality    | Genome-fragment | 1.2  | 0     |
| S17-k141_155828                             | 7172  | No  | NA | 0    | 1 | Not-determined | Genome-fragment | NA   | 0     |
| S17-k141_82249                              | 4451  | No  | NA | 0    | 2 | Not-determined | Genome-fragment | NA   | 0     |
| S17-final-viral-combined_k141_6140}[full    | 2460  | No  | NA | 0    | 0 | Low-quality    | Genome-fragment | 4.86 | 0     |
| S17-k141_204456                             | 1740  | No  | NA | 0    | 1 | Not-determined | Genome-fragment | NA   | 0     |
| S17-k141_116074                             | 1077  | No  | NA | 0    | 1 | Not-determined | Genome-fragment | NA   | 0     |
| S17-k141_247663                             | 1596  | No  | NA | 0    | 1 | Not-determined | Genome-fragment | NA   | 0     |
| S17-k141_137472                             | 1321  | No  | NA | 0    | 1 | Not-determined | Genome-fragment | NA   | 0     |
| S17-k141_148518                             | 2165  | No  | NA | 0    | 1 | Not-determined | Genome-fragment | NA   | 0     |
| S17-k141_59187                              | 6457  | No  | NA | 0    | 4 | Not-determined | Genome-fragment | NA   | 0     |
| S12-final-viral-combined_k141_250164}[full  | 2460  | No  | NA | 0    | 2 | Low-quality    | Genome-fragment | 4.73 | 0     |
| S2-final-viral-combined_k141_191512}[full   | 2460  | No  | NA | 0    | 1 | Low-quality    | Genome-fragment | 2.39 | 0     |
| S17-k141_182193                             | 5063  | No  | NA | 0    | 2 | Not-determined | Genome-fragment | NA   | 0     |
| S6-final-viral-combined_k141_79553}[full    | 2460  | No  | NA | 0    | 4 | Low-quality    | Genome-fragment | 2.03 | 0     |
| S17-k141_182220                             | 1278  | No  | NA | 0    | 1 | Not-determined | Genome-fragment | NA   | 0     |
| S5-final-viral-combined_k141_58660}[full    | 2461  | No  | NA | 3    | 0 | Low-quality    | Genome-fragment | 5.17 | 0     |
| S17-k141_137549                             | 1127  | No  | NA | 0    | 1 | Not-determined | Genome-fragment | NA   | 0     |
| S17-k141_92148                              | 6090  | No  | NA | 0    | 0 | Not-determined | Genome-fragment | NA   | 0     |
| S17-k141_37065                              | 1635  | No  | NA | 0    | 2 | Not-determined | Genome-fragment | NA   | 0     |
| S17-k141_148562                             | 1327  | No  | NA | 0    | 0 | Not-determined | Genome-fragment | NA   | 0     |
| S17-k141_126484                             | 7778  | No  | NA | 0    | 6 | Not-determined | Genome-fragment | NA   | 0     |
| S17-k141_37072                              | 1756  | No  | NA | 0    | 1 | Not-determined | Genome-fragment | NA   | 0     |
| S17-k141_215713                             | 1037  | No  | NA | 0    | 1 | Not-determined | Genome-fragment | NA   | 0     |
| S17-k141_247730                             | 1305  | No  | NA | 0    | 1 | Not-determined | Genome-fragment | NA   | 0     |
| S17-k141_126496                             | 1520  | No  | NA | 0    | 1 | Not-determined | Genome-fragment | NA   | 0     |
| S17-k141_126503                             | 1116  | No  | NA | 0    | 1 | Not-determined | Genome-fragment | NA   | 0     |
| S17-k141_126525                             | 4311  | No  | NA | 0    | 1 | Not-determined | Genome-fragment | NA   | 0     |
| S17-k141_170615                             | 1017  | No  | NA | 0    | 1 | Not-determined | Genome-fragment | NA   | 0     |
| S17-k141_182281                             | 8336  | No  | NA | 0    | 1 | Not-determined | Genome-fragment | NA   | 0     |
| S17-k141_47073                              | 1640  | No  | NA | 0    | 1 | Not-determined | Genome-fragment | NA   | 0     |
| S17-k141_158929                             | 1624  | No  | NA | 0    | 0 | Not-determined | Genome-fragment | NA   | 0     |
| S17-k141_37139                              | 5057  | No  | NA | 0    | 3 | Not-determined | Genome-fragment | NA   | 0     |
| S17-k141_247783                             | 1325  | No  | NA | 0    | 0 | Not-determined | Genome-fragment | NA   | 0     |
| S17-final-viral-combined_k141_89420}[full   | 2461  | No  | NA | 0    | 2 | Low-quality    | Genome-fragment | 1.43 | 0     |
| S17-k141_247795                             | 4170  | No  | NA | 0    | 1 | Not-determined | Genome-fragment | NA   | 0     |
| S17-k141_37173                              | 1507  | No  | NA | 0    | 2 | Not-determined | Genome-fragment | NA   | 0     |
| S8-final-viral-combined_k141_53056}[full    | 2461  | No  | NA | 3    | 0 | Low-quality    | Genome-fragment | 6.78 | 0     |
| S17-final-viral-combined_k141_243803}[full  | 2462  | No  | NA | 0    | 2 | Low-quality    | Genome-fragment | 0.78 | 0     |
| S17-k141_215854                             | 3704  | No  | NA | 0    | 0 | Not-determined | Genome-fragment | NA   | 0     |
| S17-k141_116248                             | 37748 | No  | NA | 25   | 3 | High-quality   | High-quality    | 100  | 0     |
| S17-k141_215855                             | 3099  | No  | NA | 0    | 1 | Not-determined | Genome-fragment | NA   | 0     |
| S12-final-viral-combined_k141_368806}[full  | 2462  | No  | NA | 0    | 0 | Low-quality    | Genome-fragment | 2.81 | 0     |
| S17-k141_82509                              | 1117  | No  | NA | 0    | 1 | Not-determined | Genome-fragment | NA   | 0     |
| S17-k141_82513                              | 2478  | No  | NA | 0    | 0 | Not-determined | Genome-fragment | NA   | 0     |
| S17-k141_47113                              | 1062  | No  | NA | 0    | 1 | Not-determined | Genome-fragment | NA   | 0     |
| S17-k141_237251                             | 4899  | No  | NA | 0    | 2 | Not-determined | Genome-fragment | NA   | 0     |
| S17-k141_116292                             | 1332  | No  | NA | 0    | 1 | Not-determined | Genome-fragment | NA   | 0     |
| S17-k141_71135                              | 1254  | No  | NA | 0    | 1 | Not-determined | Genome-fragment | NA   | 0     |
| S17-k141_82553                              | 4136  | No  | NA | 0    | 3 | Not-determined | Genome-fragment | NA   | 0     |
| S17-k141_170732                             | 2075  | No  | NA | 0    | 1 | Not-determined | Genome-fragment | NA   | 0     |
| S12_k141_9902                               | 2462  | No  | NA | 0    | 0 | Low-quality    | Genome-fragment | 1.27 | 0     |
| S1-final-viral-combined_k141_185261}[full   | 2463  | No  | NA | 0    | 2 | Low-quality    | Genome-fragment | 2.39 | 0     |
| S17-k141_237314                             | 1101  | No  | NA | 0    | 1 | Not-determined | Genome-fragment | NA   | 0     |
| S17-k141_82620                              | 1275  | No  | NA | 0    | 0 | Not-determined | Genome-fragment | NA   | 0     |
| S17-k141_237323                             | 1051  | No  | NA | 0    | 1 | Not-determined | Genome-fragment | NA   | 0     |
| S17-k141_193470                             | 1241  | No  | NA | 0    | 0 | Not-determined | Genome-fragment | NA   | 0     |
| S1-final-viral-combined_k141_296151}[full   | 2463  | No  | NA | 0    | 1 | Low-quality    | Genome-fragment | 3.52 | 0     |
| S17-k141_37278                              | 1075  | No  | NA | 0    |   |                |                 |      |       |



|                                      |           |       |     |     |   |    |                  |                 |       |       |
|--------------------------------------|-----------|-------|-----|-----|---|----|------------------|-----------------|-------|-------|
| S1-final-viral-combined_k141_300736  | [full]    | 2465  | No  | NA  | 0 | 0  | Low-quality      | Genome-fragment | 5.57  | 0     |
| S7-final-viral-combined_k141_55629   | [full]    | 2465  | No  | NA  | 1 | 0  | 2 Low-quality    | Genome-fragment | 3.59  | 0     |
| S17-k141_4125                        |           | 1164  | No  | NA  | 0 | 0  | 0 Not-determined | Genome-fragment | NA    | 0     |
| S17-k141_204784                      |           | 20084 | No  | NA  | 0 | 19 | Not-determined   | Genome-fragment | NA    | 0     |
| S17-k141_59555                       |           | 1378  | No  | NA  | 0 | 2  | Not-determined   | Genome-fragment | NA    | 0     |
| S17-k141_4155                        |           | 1727  | No  | NA  | 0 | 0  | Not-determined   | Genome-fragment | NA    | 0     |
| S17-k141_237527                      |           | 1033  | No  | NA  | 0 | 1  | Not-determined   | Genome-fragment | NA    | 0     |
| S17-k141_227124                      |           | 1033  | No  | NA  | 0 | 0  | Not-determined   | Genome-fragment | NA    | 0     |
| S17-k141_237536                      |           | 1039  | No  | NA  | 0 | 1  | Not-determined   | Genome-fragment | NA    | 0     |
| S17-k141_237539                      |           | 3761  | No  | NA  | 0 | 2  | Not-determined   | Genome-fragment | NA    | 0     |
| S17-k141_182726                      |           | 1839  | No  | NA  | 0 | 1  | Not-determined   | Genome-fragment | NA    | 0     |
| S17-final-viral-combined_k141_476    | [full]    | 2465  | No  | NA  | 2 | 0  | Low-quality      | Genome-fragment | 5.36  | 0     |
| S17-k141_26313                       |           | 1066  | No  | NA  | 0 | 1  | Not-determined   | Genome-fragment | NA    | 0     |
| S2-final-viral-combined_k141_29464   | [full]    | 2465  | No  | NA  | 0 | 1  | Low-quality      | Genome-fragment | 2.77  | 0     |
| S17-k141_248086                      |           | 3932  | No  | NA  | 0 | 1  | Not-determined   | Genome-fragment | NA    | 0     |
| S8-final-viral-combined_k141_130865  | [full]    | 2465  | No  | NA  | 0 | 0  | Low-quality      | Genome-fragment | 15.9  | 0     |
| S17-k141_216196                      |           | 3838  | No  | NA  | 0 | 1  | Not-determined   | Genome-fragment | NA    | 0     |
| S17-k141_83041                       |           | 1629  | No  | NA  | 0 | 2  | Not-determined   | Genome-fragment | NA    | 0     |
| S17-k141_14642                       |           | 1167  | No  | NA  | 0 | 0  | Not-determined   | Genome-fragment | NA    | 0     |
| S17-k141_193695                      |           | 3958  | No  | NA  | 0 | 3  | Not-determined   | Genome-fragment | NA    | 0     |
| S8_k141_128847                       |           | 2465  | No  | NA  | 0 | 0  | Low-quality      | Genome-fragment | 3.23  | 0     |
| S17-k141_193701                      |           | 1274  | No  | NA  | 0 | 1  | Not-determined   | Genome-fragment | NA    | 0     |
| S17-k141_259344                      |           | 1328  | No  | NA  | 0 | 0  | Not-determined   | Genome-fragment | NA    | 0     |
| S1-final-viral-combined_k141_234666  | [full]    | 2466  | Yes | 568 | 1 | 1  | Low-quality      | Genome-fragment | 1.27  | 76.97 |
| S17-k141_193729                      |           | 1358  | No  | NA  | 0 | 2  | Not-determined   | Genome-fragment | NA    | 0     |
| S5-final-viral-combined_k141_104827  | [full]    | 2466  | No  | NA  | 0 | 0  | Low-quality      | Genome-fragment | 5.74  | 0     |
| S17-k141_237627                      |           | 1423  | No  | NA  | 0 | 2  | Not-determined   | Genome-fragment | NA    | 0     |
| S17-k141_159271                      |           | 1955  | No  | NA  | 0 | 0  | Not-determined   | Genome-fragment | NA    | 0     |
| S17-k141_116795                      |           | 5145  | No  | NA  | 0 | 1  | Not-determined   | Genome-fragment | NA    | 0     |
| S17-k141_26386                       |           | 5054  | No  | NA  | 0 | 0  | Not-determined   | Genome-fragment | NA    | 0     |
| S12_k141_380323                      |           | 2466  | No  | NA  | 0 | 2  | Low-quality      | Genome-fragment | 1.41  | 0     |
| S17-k141_227224                      |           | 1209  | No  | NA  | 0 | 0  | Not-determined   | Genome-fragment | NA    | 0     |
| S17-k141_259365                      |           | 3310  | No  | NA  | 0 | 3  | Not-determined   | Genome-fragment | NA    | 0     |
| S17-k141_149040                      |           | 1120  | No  | NA  | 0 | 0  | Not-determined   | Genome-fragment | NA    | 0     |
| S8-final-viral-combined_k141_148799  | [full]    | 2466  | No  | NA  | 1 | 0  | Low-quality      | Genome-fragment | 2.77  | 0     |
| S17-k141_137961                      |           | 1341  | No  | NA  | 0 | 0  | Not-determined   | Genome-fragment | NA    | 0     |
| S11-final-viral-combined_k141_185310 | [full]    | 2467  | No  | NA  | 0 | 1  | Low-quality      | Genome-fragment | 1.93  | 0     |
| S5-final-viral-combined_k141_49596   | [full]    | 2467  | No  | NA  | 0 | 2  | Low-quality      | Genome-fragment | 1.59  | 0     |
| S17-k141_193807                      |           | 1129  | No  | NA  | 0 | 1  | Not-determined   | Genome-fragment | NA    | 0     |
| S17-k141_83064                       |           | 1020  | No  | NA  | 0 | 0  | Not-determined   | Genome-fragment | NA    | 0     |
| S2-final-viral-combined_k141_117840  | [full]    | 2467  | No  | NA  | 2 | 0  | Low-quality      | Genome-fragment | 4.2   | 0     |
| S17-k141_37607                       |           | 2470  | No  | NA  | 0 | 1  | Not-determined   | Genome-fragment | NA    | 0     |
| S17-k141_216259                      |           | 1244  | No  | NA  | 0 | 1  | Not-determined   | Genome-fragment | NA    | 0     |
| S17-k141_159365                      |           | 1508  | No  | NA  | 0 | 3  | Not-determined   | Genome-fragment | NA    | 0     |
| S17-k141_182900                      |           | 4193  | No  | NA  | 0 | 3  | Not-determined   | Genome-fragment | NA    | 0     |
| S17-k141_149333                      |           | 1574  | No  | NA  | 0 | 1  | Not-determined   | Genome-fragment | NA    | 0     |
| S17-k141_92438                       |           | 1309  | No  | NA  | 0 | 0  | Not-determined   | Genome-fragment | NA    | 0     |
| S17-k141_171172                      |           | 3071  | No  | NA  | 0 | 3  | Not-determined   | Genome-fragment | NA    | 0     |
| S17-k141_92445                       |           | 3245  | No  | NA  | 0 | 2  | Not-determined   | Genome-fragment | NA    | 0     |
| S1-final-viral-combined_k141_305382  | [full]    | 2468  | No  | NA  | 0 | 0  | Low-quality      | Genome-fragment | 2.31  | 0     |
| S17-k141_149160                      |           | 1210  | No  | NA  | 0 | 1  | Not-determined   | Genome-fragment | NA    | 0     |
| S17-k141_93164                       |           | 1582  | No  | NA  | 0 | 1  | Not-determined   | Genome-fragment | NA    | 0     |
| S17-k141_248288                      |           | 2036  | No  | NA  | 0 | 1  | Not-determined   | Genome-fragment | NA    | 0     |
| S17-k141_193874                      |           | 2051  | No  | NA  | 0 | 0  | Not-determined   | Genome-fragment | NA    | 0     |
| S17-k141_138038                      |           | 3324  | No  | NA  | 0 | 1  | Not-determined   | Genome-fragment | NA    | 0     |
| S17-k141_83207                       |           | 1609  | No  | NA  | 0 | 2  | Not-determined   | Genome-fragment | NA    | 0     |
| S17-k141_37691                       |           | 3395  | No  | NA  | 0 | 3  | Not-determined   | Genome-fragment | NA    | 0     |
| S17-k141_159425                      |           | 2316  | No  | NA  | 0 | 2  | Not-determined   | Genome-fragment | NA    | 0     |
| S17-k141_26461                       |           | 1019  | No  | NA  | 0 | 0  | Not-determined   | Genome-fragment | NA    | 0     |
| S17-k141_59835                       |           | 1054  | No  | NA  | 0 | 0  | Not-determined   | Genome-fragment | NA    | 0     |
| S3-final-viral-combined_k141_104402  | [full]    | 2468  | No  | NA  | 0 | 1  | Low-quality      | Genome-fragment | 2.07  | 0     |
| S17-k141_104447                      |           | 3386  | No  | NA  | 0 | 2  | Not-determined   | Genome-fragment | NA    | 0     |
| S17-final-viral-combined_k141_139077 | [full]    | 2468  | No  | NA  | 0 | 2  | Low-quality      | Genome-fragment | 1.77  | 0     |
| S17-k141_227431                      |           | 4226  | No  | NA  | 0 | 4  | Not-determined   | Genome-fragment | NA    | 0     |
| S17-k141_29474                       |           | 6135  | No  | NA  | 0 | 1  | Not-determined   | Genome-fragment | NA    | 0     |
| S17-k141_59851                       |           | 1514  | No  | NA  | 0 | 0  | Not-determined   | Genome-fragment | NA    | 0     |
| S17-k141_193898                      |           | 1345  | No  | NA  | 0 | 0  | Not-determined   | Genome-fragment | NA    | 0     |
| S17-k141_83216                       |           | 4727  | No  | NA  | 0 | 2  | Not-determined   | Genome-fragment | NA    | 0     |
| S17-k141_183005                      |           | 1279  | No  | NA  | 0 | 0  | Not-determined   | Genome-fragment | NA    | 0     |
| S17-k141_240054                      |           | 2468  | No  | NA  | 0 | 0  | Low-quality      | Genome-fragment | 3.53  | 0     |
| S12-final-viral-combined_k141_120940 | [full]    | 2468  | No  | NA  | 1 | 0  | Low-quality      | Genome-fragment | 7.24  | 0     |
| S17-k141_183018                      |           | 5487  | No  | NA  | 0 | 1  | Not-determined   | Genome-fragment | NA    | 0     |
| S17-k141_171279                      |           | 1062  | No  | NA  | 0 | 1  | Not-determined   | Genome-fragment | NA    | 0     |
| S17-k141_183024                      |           | 1401  | No  | NA  | 0 | 1  | Not-determined   | Genome-fragment | NA    | 0     |
| S12-final-viral-combined_k141_140198 | [full]    | 2468  | No  | NA  | 0 | 1  | Low-quality      | Genome-fragment | 1.2   | 0     |
| S17-k141_237730                      |           | 3499  | No  | NA  | 0 | 3  | Not-determined   | Genome-fragment | NA    | 0     |
| S17-k141_14825                       |           | 1921  | No  | NA  | 0 | 1  | Not-determined   | Genome-fragment | NA    | 0     |
| S17-k141_26339                       |           | 1563  | No  | NA  | 0 | 1  | Not-determined   | Genome-fragment | NA    | 0     |
| S12_k141_241289                      |           | 2468  | No  | NA  | 0 | 2  | Low-quality      | Genome-fragment | 0.92  | 0     |
| S17-k141_47532                       |           | 1023  | No  | NA  | 0 | 0  | Not-determined   | Genome-fragment | NA    | 0     |
| S17-k141_205103                      |           | 1875  | No  | NA  | 0 | 1  | Not-determined   | Genome-fragment | NA    | 0     |
| S17-k141_47142                       |           | 1323  | No  | NA  | 0 | 1  | Not-determined   | Genome-fragment | NA    | 0     |
| S17-k141_237762                      |           | 7499  | No  | NA  | 0 | 3  | Not-determined   | Genome-fragment | NA    | 0     |
| S17-k141_205139                      |           | 1235  | No  | NA  | 0 | 2  | Not-determined   | Genome-fragment | NA    | 0     |
| S17-k141_171115                      |           | 1192  | No  | NA  | 0 | 1  | Not-determined   | Genome-fragment | NA    | 0     |
| S8-final-viral-combined_k141_195537  | [full]    | 2468  | No  | NA  | 0 | 0  | Low-quality      | Genome-fragment | 15.95 | 0     |
| S17-k141_259423                      |           | 1554  | No  | NA  | 0 | 0  | Not-determined   | Genome-fragment | NA    | 0     |
| S11-final-viral-combined_k141_238196 | [lt2gene] | 2469  | No  | NA  | 1 | 0  | Low-quality      | Genome-fragment | 5.32  | 0     |
| S17-k141_216427                      |           | 1375  | No  | NA  | 0 | 1  | Not-determined   | Genome-fragment | NA    | 0     |
| S17-k141_216428                      |           | 9317  | No  | NA  | 0 | 2  | Not-determined   | Genome-fragment | NA    | 0     |
| S17-k141_149339                      |           | 1357  | No  | NA  | 0 | 1  | Not-determined   | Genome-fragment | NA    | 0     |
| S17-k141_237008                      |           | 1109  | No  | NA  | 0 | 1  | Not-determined   | Genome-fragment | NA    | 0     |
| S17-k141_26595                       |           | 3401  | No  | NA  | 0 | 1  | Not-determined   | Genome-fragment | NA    | 0     |
| S17-k141_59965                       |           | 1079  | No  | NA  | 0 | 1  | Not-determined   | Genome-fragment | NA    | 0     |
| S17-k141_181121                      |           | 1059  | No  | NA  | 0 | 1  | Not-determined   | Genome-fragment | NA    | 0     |
| S17-k141_59964                       |           | 1087  | No  | NA  | 0 | 1  | Not-determined   | Genome-fragment | NA    | 0     |
| S17-k141_171615                      |           | 1968  | No  | NA  | 0 | 2  | Not-determined   | Genome-fragment | NA    | 0     |
| S17-k141_127091                      |           | 1333  | No  | NA  | 0 | 1  | Not-determined   | Genome-fragment | NA    | 0     |
| S17-k141_259473                      |           | 1417  | No  | NA  | 0 | 0  | Not-determined   | Genome-fragment | NA    | 0     |
| S2_k141_209200                       |           | 2469  | No  | NA  | 0 | 0  | Low-quality      | Genome-fragment | 0.21  | 0     |
| S17-k141_138215                      |           | 1087  | No  | NA  | 0 | 0  | Not-determined   | Genome-fragment | NA    | 0     |
| S17-k141_248164                      |           | 6383  | No  | NA  | 0 | 4  | Not-determined   | Genome-fragment | NA    | 0     |
| S17-k141_149394                      |           | 1707  | No  | NA  | 0 | 0  | Not-determined   | Genome-fragment | NA    | 0     |
| S17-k141_26677                       |           | 1223  | No  | NA  | 0 | 0  | Not-determined   | Genome-fragment | NA    | 0     |
| S17-k141_259511                      |           | 4011  | No  | NA  | 0 | 3  | Not-determined   | Genome-fragment | NA    | 0     |
| S9_k141_58568                        |           | 2470  | No  | NA  | 0 | 0  | Low-quality      | Genome-fragment | 5.13  | 0     |
| S17-k141_227713                      |           | 1021  | No  | NA  | 0 | 1  | Not-determined   | Genome-fragment | NA    | 0     |
| S17-k141_117293                      |           | 1138  | No  | NA  | 0 | 3  | Not-determined   | Genome-fragment | NA    | 0     |
| S17-k141_371839                      |           | 2453  | No  | NA  | 0 | 0  | Not-determined   | Genome-fragment | NA    | 0     |
| S17-k141_216530                      |           | 2337  | No  | NA  | 0 | 3  | Not-determined   | Genome-fragment | NA    | 0     |
| S17-k141_71540                       |           | 3959  | No  | NA  | 0 | 4  | Not-determined   | Genome-fragment | NA    | 0     |
| S17-k141_127154                      |           | 3092  | No  | NA  | 0 | 1  | Not-determined   | Genome-fragment | NA    | 0     |
| S17-k141_104626                      |           | 1058  | No  | NA  | 0 | 1  | Not-determined   | Genome-fragment | NA    | 0     |
| S17-k141_71602                       |           | 1725  | No  | NA  | 0 | 1  | Not-determined   | Genome-fragment | NA    | 0     |
| S17-k141_259530                      |           | 4552  | No  | NA  | 0 | 1  | Not-determined   | Genome-fragment | NA    | 0     |
| S17-k141_171391                      |           | 1100  | No  | NA  | 0 | 0  | Not-determined   | Genome-fragment | NA    | 0     |
| S17-k141_26750                       |           | 2200  | No  | NA  | 0 | 0  | Not-determined   | Genome-fragment | NA    | 0     |
| S1-final-viral-combined_k141_304182  | [full]    | 2470  | No  | NA  | 2 | 2  | Low-quality      | Genome-fragment | 6.45  | 0     |
| S17-k141_259547                      |           | 3639  | No  | NA  | 0 | 0  | Not-determined   | Genome-fragment | NA    | 0     |
| S17-k141_83476                       |           | 1175  | No  | NA  | 0 | 1  | Not-determined   | Genome-fragment | NA    | 0     |
| S17-k141_138216                      |           | 1015  | No  | NA  | 0 | 0  | Not-determined   | Genome-fragment | NA    | 0     |
| S17-k141_248440                      |           | 1035  | No  | NA  | 0 | 1  | Not-determined   | Genome-fragment | NA    | 0     |
| S3-final-viral-combined_k141_52045   | [full]    | 2470  | No  | NA  | 0 | 2  | Low-quality      | Genome-fragment | 1.33  | 0     |
| S17-k141_259557                      |           | 1820  | No  | NA  | 0 | 2  | Not-determined   | Genome-fragment | NA    | 0     |
| S17-k141_259564                      |           | 1113  | No  | NA  | 0 | 0  | Not-determined   | Genome-fragment | NA    | 0     |
| S17-k141_193964                      |           | 1127  | No  | NA  | 0 | 1  | Not-determined   | Genome-fragment | NA    | 0     |
| S17-k141_17173                       |           | 1342  | No  | NA  | 0 | 1  | Not-determined   | Genome-fragment | NA    | 0     |
| S17-k141_83806                       |           | 1115  | No  | NA  | 0 | 0  | Not-determined   | Genome-fragment | NA    | 0     |
| S17-k141_149456                      |           | 1889  | No  | NA  | 0 | 4  | Not-determined   | Genome-fragment | NA    | 0     |
| S17-k141_4483                        |           | 2011  | No  | NA  | 0 | 1  | Not-determined   | Genome-fragment | NA    | 0     |
| S17-k141_227771                      |           | 1283  | No  | NA  | 0 | 1  | Not-determined   | Genome-fragment | NA    | 0     |
| S17-k141_92063                       |           | 1092  | No  | NA  | 0 | 0  | Not-determined   | Genome-fragment | NA    | 0     |
| S17-k141_216636                      |           | 1760  | No  | NA  | 0 | 2  | Not-determined   | Genome-fragment | NA    | 0     |
| S17-k141_248474                      |           | 1213  | No  | NA  | 0 | 0  | Not-determined   | Genome-fragment | NA    | 0     |
| S17-k141_205368                      |           | 1782  | No  | NA  | 0 | 1  | Not-determined   | Genome-fragment | NA    | 0     |
| S17-k141_216665                      |           | 1087  | No  | NA  | 0 | 0  | Not-determined   | Genome-fragment | NA    | 0     |
| S17-k141_183322                      |           | 4152  | No  | NA  | 0 | 0  | Not-determined   | Genome-fragment | NA    | 0     |
| S17-k141_104691                      |           | 4677  | No  | NA  | 0 | 2  | Not-determined   | Genome-fragment | NA    | 0     |
| S17-k141_127333                      |           | 1967  | No  | NA  | 0 |    |                  |                 |       |       |



|                                            |       |    |    |   |   |                |                 |      |     |
|--------------------------------------------|-------|----|----|---|---|----------------|-----------------|------|-----|
| S17-4141_171751                            | 2205  | No | NA | 0 | 0 | Not-determined | Genome-fragment | NA   | 0   |
| S17-4141_149677                            | 5609  | No | NA | 0 | 1 | Not-determined | Genome-fragment | NA   | 0   |
| S17-4141_15220                             | 1056  | No | NA | 0 | 1 | Not-determined | Genome-fragment | NA   | 0   |
| S17-4141_238073                            | 1111  | No | NA | 0 | 1 | Not-determined | Genome-fragment | NA   | 0   |
| S17-4141_117534                            | 5511  | No | NA | 0 | 2 | Not-determined | Genome-fragment | NA   | 0   |
| S17-final-viral-combined_k141_68541  full  | 2471  | No | NA | 0 | 1 | Low-quality    | Genome-fragment | 0    | 6.8 |
| S17-4141_228030                            | 1408  | No | NA | 0 | 2 | Not-determined | Genome-fragment | NA   | 0   |
| S17-4141_259762                            | 2389  | No | NA | 0 | 2 | Not-determined | Genome-fragment | NA   | 0   |
| S17-4141_228038                            | 2010  | No | NA | 0 | 2 | Not-determined | Genome-fragment | NA   | 0   |
| S17-4141_259788                            | 1103  | No | NA | 0 | 1 | Not-determined | Genome-fragment | NA   | 0   |
| S17-4141_238123                            | 1295  | No | NA | 0 | 1 | Not-determined | Genome-fragment | NA   | 0   |
| S17-4141_38254                             | 1362  | No | NA | 0 | 1 | Not-determined | Genome-fragment | NA   | 0   |
| S17-4141_238157                            | 1300  | No | NA | 0 | 1 | Not-determined | Genome-fragment | NA   | 0   |
| S17-4141_117623                            | 1815  | No | NA | 0 | 2 | Not-determined | Genome-fragment | NA   | 0   |
| S17-4141_187117                            | 1157  | No | NA | 0 | 1 | Not-determined | Genome-fragment | NA   | 0   |
| S8-final-viral-combined_k141_168547  full  | 2471  | No | NA | 1 | 0 | Low-quality    | Genome-fragment | 6.24 | 0   |
| S17-4141_15289                             | 1084  | No | NA | 0 | 1 | Not-determined | Genome-fragment | NA   | 0   |
| S17-4141_228117                            | 1334  | No | NA | 0 | 0 | Not-determined | Genome-fragment | NA   | 0   |
| S11_4141_218240                            | 2472  | No | NA | 0 | 0 | Low-quality    | Genome-fragment | 2.49 | 0   |
| S17-4141_248773                            | 8526  | No | NA | 0 | 4 | Not-determined | Genome-fragment | NA   | 0   |
| S2-final-viral-combined_k141_88716  full   | 2472  | No | NA | 0 | 0 | Low-quality    | Genome-fragment | 6.67 | 0   |
| S17-4141_216951                            | 1182  | No | NA | 0 | 1 | Not-determined | Genome-fragment | NA   | 0   |
| S17-4141_60438                             | 2890  | No | NA | 0 | 0 | Not-determined | Genome-fragment | NA   | 0   |
| S17-4141_92878                             | 1543  | No | NA | 0 | 0 | Not-determined | Genome-fragment | NA   | 0   |
| S17-4141_248833                            | 1025  | No | NA | 0 | 0 | Not-determined | Genome-fragment | NA   | 0   |
| S17-4141_183759                            | 1313  | No | NA | 0 | 0 | Not-determined | Genome-fragment | NA   | 0   |
| S17-4141_160066                            | 3654  | No | NA | 0 | 0 | Not-determined | Genome-fragment | NA   | 0   |
| S2-final-viral-combined_k141_186293  full  | 2472  | No | NA | 1 | 0 | Low-quality    | Genome-fragment | 5.37 | 0   |
| S17-4141_105092                            | 1201  | No | NA | 0 | 1 | Not-determined | Genome-fragment | NA   | 0   |
| S17-4141_38357                             | 2886  | No | NA | 0 | 0 | Not-determined | Genome-fragment | NA   | 0   |
| S17-4141_60483                             | 2830  | No | NA | 0 | 0 | Not-determined | Genome-fragment | NA   | 0   |
| S17-4141_201790                            | 1004  | No | NA | 0 | 0 | Not-determined | Genome-fragment | NA   | 0   |
| S17-4141_4860                              | 2992  | No | NA | 0 | 2 | Not-determined | Genome-fragment | NA   | 0   |
| S7-final-viral-combined_k141_214266  full  | 2473  | No | NA | 1 | 0 | Low-quality    | Genome-fragment | 1.59 | 0   |
| S17-4141_105118                            | 1413  | No | NA | 0 | 2 | Not-determined | Genome-fragment | NA   | 0   |
| S17-4141_60527                             | 1300  | No | NA | 0 | 1 | Not-determined | Genome-fragment | NA   | 0   |
| S17-4141_149873                            | 1068  | No | NA | 0 | 0 | Not-determined | Genome-fragment | NA   | 0   |
| S17-4141_160116                            | 3642  | No | NA | 0 | 1 | Not-determined | Genome-fragment | NA   | 0   |
| S17-4141_217015                            | 2355  | No | NA | 0 | 2 | Not-determined | Genome-fragment | NA   | 0   |
| S17-4141_149889                            | 1132  | No | NA | 0 | 1 | Not-determined | Genome-fragment | NA   | 0   |
| S17-4141_238259                            | 1767  | No | NA | 0 | 0 | Not-determined | Genome-fragment | NA   | 0   |
| S17-4141_4901                              | 4431  | No | NA | 0 | 2 | Not-determined | Genome-fragment | NA   | 0   |
| S17-4141_183852                            | 1072  | No | NA | 0 | 0 | Not-determined | Genome-fragment | NA   | 0   |
| S2-final-viral-combined_k141_215216  full  | 2473  | No | NA | 1 | 0 | Low-quality    | Genome-fragment | 6.87 | 0   |
| S17-4141_117781                            | 2101  | No | NA | 0 | 1 | Not-determined | Genome-fragment | NA   | 0   |
| S17-4141_60571                             | 1101  | No | NA | 0 | 1 | Not-determined | Genome-fragment | NA   | 0   |
| S17-4141_127739                            | 2380  | No | NA | 0 | 3 | Not-determined | Genome-fragment | NA   | 0   |
| S17-4141_72233                             | 1205  | No | NA | 0 | 1 | Not-determined | Genome-fragment | NA   | 0   |
| S17-4141_60586                             | 3066  | No | NA | 0 | 1 | Not-determined | Genome-fragment | NA   | 0   |
| S17-4141_117795                            | 7202  | No | NA | 0 | 1 | Not-determined | Genome-fragment | NA   | 0   |
| S17-4141_92949                             | 1452  | No | NA | 0 | 0 | Not-determined | Genome-fragment | NA   | 0   |
| S17-4141_94125                             | 1271  | No | NA | 0 | 1 | Not-determined | Genome-fragment | NA   | 0   |
| S17-4141_160192                            | 1399  | No | NA | 0 | 0 | Not-determined | Genome-fragment | NA   | 0   |
| S7-final-viral-combined_k141_112029  full  | 2474  | No | NA | 5 | 0 | Low-quality    | Genome-fragment | 5.3  | 0   |
| S17-4141_149980                            | 1388  | No | NA | 0 | 1 | Not-determined | Genome-fragment | NA   | 0   |
| S17-4141_160210                            | 3508  | No | NA | 0 | 3 | Not-determined | Genome-fragment | NA   | 0   |
| S17-4141_27241                             | 1354  | No | NA | 0 | 1 | Not-determined | Genome-fragment | NA   | 0   |
| S17-4141_92974                             | 3068  | No | NA | 0 | 3 | Not-determined | Genome-fragment | NA   | 0   |
| S5-final-viral-combined_k141_2991  full    | 2475  | No | NA | 0 | 0 | Low-quality    | Genome-fragment | 3.39 | 0   |
| S17-4141_217145                            | 1431  | No | NA | 0 | 1 | Not-determined | Genome-fragment | NA   | 0   |
| S17-4141_217146                            | 1307  | No | NA | 0 | 0 | Not-determined | Genome-fragment | NA   | 0   |
| S17-4141_160227                            | 1144  | No | NA | 0 | 1 | Not-determined | Genome-fragment | NA   | 0   |
| S17-4141_217164                            | 1622  | No | NA | 0 | 2 | Not-determined | Genome-fragment | NA   | 0   |
| S17-final-viral-combined_k141_117931  full | 2475  | No | NA | 1 | 0 | Low-quality    | Genome-fragment | 6.77 | 0   |
| S17-4141_228368                            | 1215  | No | NA | 0 | 1 | Not-determined | Genome-fragment | NA   | 0   |
| S17-final-viral-combined_k141_130651  full | 2475  | No | NA | 0 | 0 | Low-quality    | Genome-fragment | 3.63 | 0   |
| S17-4141_183927                            | 1292  | No | NA | 0 | 0 | Not-determined | Genome-fragment | NA   | 0   |
| S17-4141_84185                             | 1955  | No | NA | 0 | 2 | Not-determined | Genome-fragment | NA   | 0   |
| S17-4141_101285                            | 1176  | No | NA | 0 | 0 | Not-determined | Genome-fragment | NA   | 0   |
| S17-4141_72346                             | 1753  | No | NA | 0 | 2 | Not-determined | Genome-fragment | NA   | 0   |
| S17-4141_72356                             | 1262  | No | NA | 0 | 1 | Not-determined | Genome-fragment | NA   | 0   |
| S17-4141_127836                            | 2114  | No | NA | 0 | 0 | Not-determined | Genome-fragment | NA   | 0   |
| S12-final-viral-combined_k141_29761  full  | 2475  | No | NA | 0 | 1 | Low-quality    | Genome-fragment | 1.25 | 0   |
| S17-4141_183954                            | 6012  | No | NA | 0 | 0 | Not-determined | Genome-fragment | NA   | 0   |
| S17-4141_260227                            | 4798  | No | NA | 0 | 1 | Not-determined | Genome-fragment | NA   | 0   |
| S17-4141_172092                            | 1288  | No | NA | 0 | 1 | Not-determined | Genome-fragment | NA   | 0   |
| S2-final-viral-combined_k141_244489  full  | 2475  | No | NA | 0 | 0 | Low-quality    | Genome-fragment | 6.96 | 0   |
| S8-final-viral-combined_k141_22615  full   | 2476  | No | NA | 0 | 1 | Low-quality    | Genome-fragment | 5.02 | 0   |
| S1-final-viral-combined_k141_105076  full  | 2476  | No | NA | 0 | 1 | Low-quality    | Genome-fragment | 4.28 | 0   |
| S17-4141_5099                              | 1169  | No | NA | 0 | 2 | Not-determined | Genome-fragment | NA   | 0   |
| S17-4141_160302                            | 1403  | No | NA | 0 | 1 | Not-determined | Genome-fragment | NA   | 0   |
| S17-4141_59192                             | 2717  | No | NA | 0 | 1 | Not-determined | Genome-fragment | NA   | 0   |
| S17-4141_15524                             | 3082  | No | NA | 0 | 0 | Not-determined | Genome-fragment | NA   | 0   |
| S1_k141_11576                              | 2476  | No | NA | 3 | 0 | Low-quality    | Genome-fragment | 4.24 | 0   |
| S7-final-viral-combined_k141_230685  full  | 2476  | No | NA | 0 | 2 | Low-quality    | Genome-fragment | 1.08 | 0   |
| S17-4141_206038                            | 4297  | No | NA | 0 | 2 | Not-determined | Genome-fragment | NA   | 0   |
| S17-4141_217247                            | 3536  | No | NA | 0 | 0 | Not-determined | Genome-fragment | NA   | 0   |
| S17-4141_238452                            | 1484  | No | NA | 0 | 2 | Not-determined | Genome-fragment | NA   | 0   |
| S17-4141_101390                            | 6073  | No | NA | 0 | 0 | Not-determined | Genome-fragment | NA   | 0   |
| S12-final-viral-combined_k141_381698  full | 2476  | No | NA | 1 | 0 | Low-quality    | Genome-fragment | 3.56 | 0   |
| S17-4141_38486                             | 1001  | No | NA | 0 | 2 | Not-determined | Genome-fragment | NA   | 0   |
| S17-4141_151557                            | 2150  | No | NA | 0 | 1 | Not-determined | Genome-fragment | NA   | 0   |
| S17-4141_15569                             | 1404  | No | NA | 0 | 3 | Not-determined | Genome-fragment | NA   | 0   |
| S17-4141_139330                            | 1166  | No | NA | 0 | 0 | Not-determined | Genome-fragment | NA   | 0   |
| S17-4141_194772                            | 1128  | No | NA | 0 | 0 | Not-determined | Genome-fragment | NA   | 0   |
| S17-4141_260127                            | 1031  | No | NA | 0 | 2 | Not-determined | Genome-fragment | NA   | 0   |
| S17-4141_127932                            | 1013  | No | NA | 0 | 1 | Not-determined | Genome-fragment | NA   | 0   |
| S17-4141_228506                            | 2142  | No | NA | 0 | 1 | Not-determined | Genome-fragment | NA   | 0   |
| S17-4141_238518                            | 3212  | No | NA | 0 | 1 | Not-determined | Genome-fragment | NA   | 0   |
| S17-4141_93151                             | 1795  | No | NA | 0 | 0 | Not-determined | Genome-fragment | NA   | 0   |
| S17-4141_38562                             | 1006  | No | NA | 0 | 1 | Not-determined | Genome-fragment | NA   | 0   |
| S17-4141_118093                            | 1451  | No | NA | 0 | 0 | Not-determined | Genome-fragment | NA   | 0   |
| S17-4141_260171                            | 1688  | No | NA | 0 | 1 | Not-determined | Genome-fragment | NA   | 0   |
| S8-final-viral-combined_k141_106502  full  | 2476  | No | NA | 3 | 0 | Low-quality    | Genome-fragment | 3.01 | 0   |
| S17-4141_38180                             | 1216  | No | NA | 0 | 1 | Not-determined | Genome-fragment | NA   | 0   |
| S17-4141_48173                             | 1083  | No | NA | 0 | 1 | Not-determined | Genome-fragment | NA   | 0   |
| S17-4141_84233                             | 1160  | No | NA | 0 | 1 | Not-determined | Genome-fragment | NA   | 0   |
| S17-4141_60843                             | 1209  | No | NA | 0 | 0 | Not-determined | Genome-fragment | NA   | 0   |
| S17-final-viral-combined_k141_58966  full  | 2477  | No | NA | 0 | 1 | Low-quality    | Genome-fragment | 3.18 | 0   |
| S17-4141_194876                            | 2892  | No | NA | 0 | 2 | Not-determined | Genome-fragment | NA   | 0   |
| S17-4141_118121                            | 2633  | No | NA | 0 | 4 | Not-determined | Genome-fragment | NA   | 0   |
| S17-4141_194880                            | 1003  | No | NA | 0 | 0 | Not-determined | Genome-fragment | NA   | 0   |
| S17-4141_38628                             | 2844  | No | NA | 0 | 1 | Not-determined | Genome-fragment | NA   | 0   |
| S17-4141_15623                             | 1041  | No | NA | 0 | 1 | Not-determined | Genome-fragment | NA   | 0   |
| S17-4141_206252                            | 1219  | No | NA | 0 | 2 | Not-determined | Genome-fragment | NA   | 0   |
| S4_k141_70643                              | 2477  | No | NA | 0 | 0 | Low-quality    | Genome-fragment | 6.28 | 0   |
| S17-4141_249076                            | 3778  | No | NA | 0 | 4 | Not-determined | Genome-fragment | NA   | 0   |
| S11-final-viral-combined_k141_293337  full | 2478  | No | NA | 2 | 0 | Low-quality    | Genome-fragment | 3.8  | 0   |
| S17-4141_115840                            | 1030  | No | NA | 0 | 0 | Not-determined | Genome-fragment | NA   | 0   |
| S17-4141_150203                            | 2024  | No | NA | 0 | 1 | Not-determined | Genome-fragment | NA   | 0   |
| S17-4141_193285                            | 1280  | No | NA | 0 | 0 | Not-determined | Genome-fragment | NA   | 0   |
| S11-final-viral-combined_k141_48117  full  | 2478  | No | NA | 0 | 0 | Low-quality    | Genome-fragment | 6.93 | 0   |
| S7-final-viral-combined_k141_10440  full   | 2478  | No | NA | 0 | 0 | Low-quality    | Genome-fragment | 4.36 | 0   |
| S17-4141_172172                            | 1168  | No | NA | 0 | 0 | Not-determined | Genome-fragment | NA   | 0   |
| S17-4141_260224                            | 1072  | No | NA | 0 | 0 | Not-determined | Genome-fragment | NA   | 0   |
| S17-4141_206309                            | 1114  | No | NA | 0 | 1 | Not-determined | Genome-fragment | NA   | 0   |
| S17-4141_238658                            | 1041  | No | NA | 0 | 0 | Not-determined | Genome-fragment | NA   | 0   |
| S17-4141_217476                            | 3167  | No | NA | 0 | 3 | Not-determined | Genome-fragment | NA   | 0   |
| S17-4141_60925                             | 3431  | No | NA | 0 | 2 | Not-determined | Genome-fragment | NA   | 0   |
| S17-final-viral-combined_k141_157305  full | 2478  | No | NA | 0 | 0 | Low-quality    | Genome-fragment | 3.21 | 0   |
| S17-4141_217499                            | 1316  | No | NA | 0 | 1 | Not-determined | Genome-fragment | NA   | 0   |
| S17-4141_160554                            | 1072  | No | NA | 0 | 1 | Not-determined | Genome-fragment | NA   | 0   |
| S17-4141_238697                            | 4697  | No | NA | 0 | 3 | Not-determined | Genome-fragment | NA   | 0   |
| S17-4141_72614                             | 2383  | No | NA | 0 | 2 | Not-determined | Genome-fragment | NA   | 0   |
| S17-4141_249150                            | 1819  | No | NA | 0 | 1 | Not-determined | Genome-fragment | NA   | 0   |
| S17-4141_184170                            | 14093 | No | NA | 0 | 5 | Not-determined | Genome-fragment | NA   | 0   |
| S17-4141_238723                            | 2304  | No | NA | 0 | 2 | Not-determined | Genome-fragment | NA   | 0   |
| S17-4141_5320                              | 1939  | No | NA | 0 | 0 | Not-determined | Genome-fragment | NA   | 0   |
| S17-4141_206369                            | 1773  | No | NA | 0 | 0 | Not-determined | Genome-fragment | NA   | 0   |
| S17-4141_160608                            | 1352  | No | NA | 0 | 2 | Not-determined | Genome-fragment | NA   | 0   |
| S17-4141_48308                             | 1183  | No | NA | 0 | 1 | Not-determined | Genome-fragment | NA   | 0   |
| S17-4141_48313                             | 1486  | No | NA | 0 | 0 | Not-determined | Genome-fragment | NA   | 0   |
| S17-4141_195002                            | 2246  | No | NA | 0 | 2 | Not-determined | Genome-fragment | NA   | 0   |
| S17-4141_61016                             | 1048  | No | NA | 0 | 0 | Not-determined | Genome-fragment |      |     |



|                                            |       |     |    |      |   |                |                 |      |       |
|--------------------------------------------|-------|-----|----|------|---|----------------|-----------------|------|-------|
| S17-k141_184446                            | 1190  | No  | NA | 0    | 1 | Not-determined | Genome-fragment | NA   | 0     |
| S17-k141_184504                            | 4093  | No  | NA | 0    | 0 | Not-determined | Genome-fragment | NA   | 0     |
| S17-k141_184492                            | 1312  | No  | NA | 0    | 0 | Not-determined | Genome-fragment | NA   | 0     |
| S4-final-viral-combined_k141_114301[full]  | 2480  | Yes |    | 863  | 1 | Low-quality    | Genome-fragment | 1.73 | 65.2  |
| S17-k141_61175                             | 1052  | No  | NA | 0    | 0 | Not-determined | Genome-fragment | NA   | 0     |
| S17-k141_93481                             | 7371  | No  | NA | 0    | 0 | Not-determined | Genome-fragment | NA   | 0     |
| S17-k141_217833                            | 1007  | No  | NA | 0    | 0 | Not-determined | Genome-fragment | NA   | 0     |
| S6-final-viral-combined_k141_11151[full]   | 2480  | No  | NA | 2    | 0 | Low-quality    | Genome-fragment | 5.05 | 0     |
| S17-k141_118509                            | 5493  | No  | NA | 0    | 0 | Not-determined | Genome-fragment | NA   | 0     |
| S17-k141_61244                             | 1310  | No  | NA | 0    | 0 | Not-determined | Genome-fragment | NA   | 0     |
| S17-k141_228972                            | 1099  | No  | NA | 0    | 0 | Not-determined | Genome-fragment | NA   | 0     |
| S17-k141_205732                            | 1236  | No  | NA | 0    | 0 | Not-determined | Genome-fragment | NA   | 0     |
| S17-k141_118554                            | 2253  | No  | NA | 0    | 0 | Not-determined | Genome-fragment | NA   | 0     |
| S17-k141_150604                            | 21029 | No  | NA | 0    | 8 | Not-determined | Genome-fragment | NA   | 0     |
| S17-k141_105855                            | 1382  | No  | NA | 0    | 0 | Not-determined | Genome-fragment | NA   | 0     |
| S17-k141_105837                            | 1458  | No  | NA | 0    | 0 | Not-determined | Genome-fragment | NA   | 0     |
| S17-k141_118592                            | 4961  | No  | NA | 0    | 4 | Not-determined | Genome-fragment | NA   | 0     |
| S17-k141_38920                             | 1056  | No  | NA | 0    | 1 | Not-determined | Genome-fragment | NA   | 0     |
| S17-k141_229030                            | 3564  | No  | NA | 0    | 3 | Not-determined | Genome-fragment | NA   | 0     |
| S17-k141_15957                             | 7705  | No  | NA | 0    | 3 | Not-determined | Genome-fragment | NA   | 0     |
| S17-k141_61298                             | 1443  | No  | NA | 0    | 1 | Not-determined | Genome-fragment | NA   | 0     |
| S17-k141_105860                            | 2072  | No  | NA | 0    | 1 | Not-determined | Genome-fragment | NA   | 0     |
| S17-k141_15990                             | 2517  | No  | NA | 0    | 4 | Not-determined | Genome-fragment | NA   | 0     |
| S17-k141_105886                            | 1730  | No  | NA | 0    | 1 | Not-determined | Genome-fragment | NA   | 0     |
| S17-k141_93915                             | 5384  | No  | NA | 0    | 1 | Not-determined | Genome-fragment | NA   | 0     |
| S17-k141_239123                            | 1024  | No  | NA | 0    | 1 | Not-determined | Genome-fragment | NA   | 0     |
| S17-k141_118623                            | 1029  | No  | NA | 0    | 1 | Not-determined | Genome-fragment | NA   | 0     |
| S17-k141_160962                            | 1106  | No  | NA | 0    | 0 | Not-determined | Genome-fragment | NA   | 0     |
| S17-k141_217993                            | 1990  | No  | NA | 0    | 0 | Not-determined | Genome-fragment | NA   | 0     |
| S8_k141_176228                             | 2480  | No  | NA | 0    | 2 | Low-quality    | Genome-fragment | 3.53 | 0     |
| S17-k141_172610                            | 5588  | No  | NA | 0    | 5 | Not-determined | Genome-fragment | NA   | 0     |
| S17-k141_160991                            | 2346  | No  | NA | 0    | 1 | Not-determined | Genome-fragment | NA   | 0     |
| S17-k141_93666                             | 3962  | No  | NA | 0    | 0 | Not-determined | Genome-fragment | NA   | 0     |
| S17-k141_260640                            | 4286  | No  | NA | 0    | 4 | Not-determined | Genome-fragment | NA   | 0     |
| S17-k141_206921                            | 3788  | No  | NA | 0    | 2 | Not-determined | Genome-fragment | NA   | 0     |
| S1-final-viral-combined_k141_35590[full]   | 2481  | Yes |    | 2004 | 1 | Low-quality    | Genome-fragment | 5.36 | 19.23 |
| S1-final-viral-combined_k141_105804[full]  | 2481  | No  | NA | 0    | 0 | Low-quality    | Genome-fragment | 6.41 | 0     |
| S17-k141_172675                            | 1093  | No  | NA | 0    | 0 | Not-determined | Genome-fragment | NA   | 0     |
| S17-k141_93675                             | 7463  | No  | NA | 0    | 3 | Not-determined | Genome-fragment | NA   | 0     |
| S1-final-viral-combined_k141_356683[full]  | 2481  | No  | NA | 2    | 0 | Low-quality    | Genome-fragment | 4.73 | 0     |
| S17-k141_218031                            | 1344  | No  | NA | 0    | 0 | Not-determined | Genome-fragment | NA   | 0     |
| S17-k141_260668                            | 1193  | No  | NA | 0    | 0 | Not-determined | Genome-fragment | NA   | 0     |
| S17-k141_106011                            | 1328  | No  | NA | 0    | 1 | Not-determined | Genome-fragment | NA   | 0     |
| S17-k141_84749                             | 1019  | No  | NA | 0    | 0 | Not-determined | Genome-fragment | NA   | 0     |
| S1-final-viral-combined_k141_274450[full]  | 2481  | No  | NA | 0    | 2 | Low-quality    | Genome-fragment | 1.36 | 0     |
| S17-k141_128614                            | 1817  | No  | NA | 0    | 1 | Not-determined | Genome-fragment | NA   | 0     |
| S17-k141_249635                            | 1388  | No  | NA | 0    | 0 | Not-determined | Genome-fragment | NA   | 0     |
| S17-k141_239232                            | 3177  | No  | NA | 0    | 0 | Not-determined | Genome-fragment | NA   | 0     |
| S17-k141_195625                            | 1117  | No  | NA | 0    | 1 | Not-determined | Genome-fragment | NA   | 0     |
| S17-k141_139899                            | 2464  | No  | NA | 0    | 2 | Not-determined | Genome-fragment | NA   | 0     |
| S17-k141_27822                             | 1030  | No  | NA | 0    | 1 | Not-determined | Genome-fragment | NA   | 0     |
| S17-k141_48742                             | 1060  | No  | NA | 0    | 0 | Not-determined | Genome-fragment | NA   | 0     |
| S17-k141_39052                             | 1220  | No  | NA | 0    | 1 | Not-determined | Genome-fragment | NA   | 0     |
| S17-k141_39060                             | 1053  | No  | NA | 0    | 1 | Not-determined | Genome-fragment | NA   | 0     |
| S17-k141_139939                            | 1106  | No  | NA | 0    | 0 | Not-determined | Genome-fragment | NA   | 0     |
| S7-final-viral-combined_k141_18652[full]   | 2481  | No  | NA | 1    | 1 | Low-quality    | Genome-fragment | 1.33 | 0     |
| S12-final-viral-combined_k141_223969[full] | 2481  | No  | NA | 1    | 0 | Low-quality    | Genome-fragment | 5.79 | 0     |
| S17-k141_177783                            | 1049  | No  | NA | 0    | 1 | Not-determined | Genome-fragment | NA   | 0     |
| S2_k141_5039                               | 2481  | No  | NA | 0    | 1 | Low-quality    | Genome-fragment | 1.27 | 0     |
| S17-k141_249672                            | 1360  | No  | NA | 0    | 0 | Not-determined | Genome-fragment | NA   | 0     |
| S17-k141_260778                            | 1076  | No  | NA | 0    | 0 | Not-determined | Genome-fragment | NA   | 0     |
| S17-k141_207039                            | 1111  | No  | NA | 0    | 0 | Not-determined | Genome-fragment | NA   | 0     |
| S17-k141_84857                             | 1546  | No  | NA | 0    | 2 | Not-determined | Genome-fragment | NA   | 0     |
| S1-final-viral-combined_k141_225988[full]  | 2482  | No  | NA | 0    | 2 | Low-quality    | Genome-fragment | 1.99 | 0     |
| S17-k141_218211                            | 2049  | No  | NA | 0    | 3 | Not-determined | Genome-fragment | NA   | 0     |
| S17-k141_16138                             | 2257  | No  | NA | 0    | 0 | Not-determined | Genome-fragment | NA   | 0     |
| S17-k141_128694                            | 1931  | No  | NA | 0    | 1 | Not-determined | Genome-fragment | NA   | 0     |
| S17-k141_39147                             | 1626  | No  | NA | 0    | 1 | Not-determined | Genome-fragment | NA   | 0     |
| S7-final-viral-combined_k141_178729[full]  | 2482  | No  | NA | 0    | 1 | Low-quality    | Genome-fragment | 6.37 | 0     |
| S17-k141_229382                            | 1265  | No  | NA | 0    | 1 | Not-determined | Genome-fragment | NA   | 0     |
| S7-final-viral-combined_k141_233476[full]  | 2482  | No  | NA | 1    | 0 | Low-quality    | Genome-fragment | 3.48 | 0     |
| S17-k141_140038                            | 2940  | No  | NA | 0    | 0 | Not-determined | Genome-fragment | NA   | 0     |
| S17-k141_106139                            | 3486  | No  | NA | 0    | 0 | Not-determined | Genome-fragment | NA   | 0     |
| S7-final-viral-combined_k141_173345[full]  | 2482  | No  | NA | 1    | 0 | Low-quality    | Genome-fragment | 5.3  | 0     |
| S12-final-viral-combined_k141_227238[full] | 2482  | No  | NA | 0    | 0 | Low-quality    | Genome-fragment | 6.43 | 0     |
| S17-k141_207073                            | 1021  | No  | NA | 0    | 1 | Not-determined | Genome-fragment | NA   | 0     |
| S2-final-viral-combined_k141_201973[full]  | 2482  | No  | NA | 1    | 0 | Low-quality    | Genome-fragment | 5.91 | 0     |
| S17-k141_48867                             | 1123  | No  | NA | 0    | 0 | Not-determined | Genome-fragment | NA   | 0     |
| S17-k141_118806                            | 1457  | No  | NA | 0    | 0 | Not-determined | Genome-fragment | NA   | 0     |
| S17-k141_84928                             | 1369  | No  | NA | 0    | 1 | Not-determined | Genome-fragment | NA   | 0     |
| S17-k141_16150                             | 1588  | No  | NA | 0    | 2 | Not-determined | Genome-fragment | NA   | 0     |
| S17-k141_218281                            | 3085  | No  | NA | 0    | 2 | Not-determined | Genome-fragment | NA   | 0     |
| S17-k141_249763                            | 1009  | No  | NA | 0    | 1 | Not-determined | Genome-fragment | NA   | 0     |
| S17-k141_5864                              | 1005  | No  | NA | 0    | 0 | Not-determined | Genome-fragment | NA   | 0     |
| S2_k141_210517                             | 2482  | No  | NA | 0    | 0 | Low-quality    | Genome-fragment | 2.59 | 0     |
| S17-k141_93786                             | 4909  | No  | NA | 0    | 4 | Not-determined | Genome-fragment | NA   | 0     |
| S17-k141_106223                            | 1010  | No  | NA | 0    | 1 | Not-determined | Genome-fragment | NA   | 0     |
| S17-k141_39249                             | 1956  | No  | NA | 0    | 1 | Not-determined | Genome-fragment | NA   | 0     |
| S8-final-viral-combined_k141_8853[full]    | 2483  | No  | NA | 3    | 0 | Low-quality    | Genome-fragment | 21.1 | 0     |
| S17-k141_93813                             | 6486  | No  | NA | 0    | 2 | Not-determined | Genome-fragment | NA   | 0     |
| S17-k141_93817                             | 1055  | No  | NA | 0    | 2 | Not-determined | Genome-fragment | NA   | 0     |
| S17-k141_195004                            | 1042  | No  | NA | 0    | 0 | Not-determined | Genome-fragment | NA   | 0     |
| S1-final-viral-combined_k141_282867[full]  | 2483  | No  | NA | 1    | 0 | Low-quality    | Genome-fragment | 5.62 | 0     |
| S5-final-viral-combined_k141_63036[full]   | 2483  | No  | NA | 0    | 4 | Low-quality    | Genome-fragment | 0.82 | 0     |
| S17-k141_195819                            | 1388  | No  | NA | 0    | 0 | Not-determined | Genome-fragment | NA   | 0     |
| S17-k141_249785                            | 1123  | No  | NA | 0    | 0 | Not-determined | Genome-fragment | NA   | 0     |
| S17-k141_140198                            | 1344  | No  | NA | 0    | 1 | Not-determined | Genome-fragment | NA   | 0     |
| S17-k141_48988                             | 3309  | No  | NA | 0    | 2 | Not-determined | Genome-fragment | NA   | 0     |
| S17-k141_207255                            | 1813  | No  | NA | 0    | 2 | Not-determined | Genome-fragment | NA   | 0     |
| S17-k141_229589                            | 1347  | No  | NA | 0    | 0 | Not-determined | Genome-fragment | NA   | 0     |
| S17-k141_48994                             | 3678  | No  | NA | 0    | 1 | Not-determined | Genome-fragment | NA   | 0     |
| S5-final-viral-combined_k141_48043[full]   | 2483  | No  | NA | 1    | 0 | Low-quality    | Genome-fragment | 4.43 | 0     |
| S17-k141_128787                            | 1120  | No  | NA | 0    | 2 | Not-determined | Genome-fragment | NA   | 0     |
| S17-k141_150914                            | 1476  | No  | NA | 0    | 1 | Not-determined | Genome-fragment | NA   | 0     |
| S17-k141_185091                            | 4673  | No  | NA | 0    | 1 | Not-determined | Genome-fragment | NA   | 0     |
| S17-k141_140253                            | 1118  | No  | NA | 0    | 1 | Not-determined | Genome-fragment | NA   | 0     |
| S17-k141_261085                            | 1502  | No  | NA | 0    | 1 | Not-determined | Genome-fragment | NA   | 0     |
| S17-k141_39384                             | 1084  | No  | NA | 0    | 1 | Not-determined | Genome-fragment | NA   | 0     |
| S5-final-viral-combined_k141_95384[full]   | 2483  | No  | NA | 0    | 1 | Low-quality    | Genome-fragment | 3.93 | 0     |
| S17-k141_118981                            | 1235  | No  | NA | 0    | 3 | Not-determined | Genome-fragment | NA   | 0     |
| S17-k141_185146                            | 1167  | No  | NA | 0    | 2 | Not-determined | Genome-fragment | NA   | 0     |
| S17-k141_93914                             | 1672  | No  | NA | 0    | 1 | Not-determined | Genome-fragment | NA   | 0     |
| S17-k141_128863                            | 1320  | No  | NA | 0    | 0 | Not-determined | Genome-fragment | NA   | 0     |
| S17-k141_118991                            | 1302  | No  | NA | 0    | 1 | Not-determined | Genome-fragment | NA   | 0     |
| S17-k141_50138                             | 1046  | No  | NA | 0    | 1 | Not-determined | Genome-fragment | NA   | 0     |
| S17-k141_195957                            | 3840  | No  | NA | 0    | 5 | Not-determined | Genome-fragment | NA   | 0     |
| S17-k141_195958                            | 1106  | No  | NA | 0    | 0 | Not-determined | Genome-fragment | NA   | 0     |
| S17-k141_16388                             | 1510  | No  | NA | 0    | 1 | Not-determined | Genome-fragment | NA   | 0     |
| S17-k141_85142                             | 1015  | No  | NA | 0    | 1 | Not-determined | Genome-fragment | NA   | 0     |
| S17-k141_85143                             | 2170  | No  | NA | 0    | 4 | Not-determined | Genome-fragment | NA   | 0     |
| S17-k141_229652                            | 3361  | No  | NA | 0    | 3 | Not-determined | Genome-fragment | NA   | 0     |
| S17-k141_28128                             | 1387  | No  | NA | 0    | 0 | Not-determined | Genome-fragment | NA   | 0     |
| S17-k141_173169                            | 1157  | No  | NA | 0    | 1 | Not-determined | Genome-fragment | NA   | 0     |
| S17-k141_28142                             | 1195  | No  | NA | 0    | 4 | Not-determined | Genome-fragment | NA   | 0     |
| S17-k141_61859                             | 2181  | No  | NA | 0    | 4 | Not-determined | Genome-fragment | NA   | 0     |
| S17-k141_28154                             | 1504  | No  | NA | 0    | 1 | Not-determined | Genome-fragment | NA   | 0     |
| S17-k141_207419                            | 1556  | No  | NA | 0    | 0 | Not-determined | Genome-fragment | NA   | 0     |
| S7-final-viral-combined_k141_99362[full]   | 2483  | No  | NA | 0    | 2 | Low-quality    | Genome-fragment | 3.15 | 0     |
| S17-k141_16448                             | 9007  | No  | NA | 1    | 1 | Not-determined | Genome-fragment | NA   | 0     |
| S17-k141_161348                            | 1151  | No  | NA | 0    | 3 | Not-determined | Genome-fragment | NA   | 0     |
| S17-k141_6127                              | 1943  | No  | NA | 0    | 0 | Not-determined | Genome-fragment | NA   | 0     |
| S17-k141_16493                             | 3994  | No  | NA | 0    | 1 | Not-determined | Genome-fragment | NA   | 0     |
| S7-final-viral-combined_k141_205102[full]  | 2483  | No  | NA | 1    | 0 | Low-quality    | Genome-fragment | 6.44 | 0     |
| S17-k141_161395                            | 1400  | No  | NA | 0    | 1 | Not-determined | Genome-fragment | NA   | 0     |
| S17-k141_161397                            | 1067  | No  | NA | 0    | 0 | Not-determined | Genome-fragment | NA   | 0     |
| S17-k141_261248                            | 1077  | No  | NA | 0    | 1 | Not-determined | Genome-fragment | NA   | 0     |
| S17-k141_49146                             | 3260  | No  | NA | 0    | 1 | Not-determined | Genome-fragment | NA   | 0     |
| S17-k141_61989                             | 1148  | No  | NA | 0    | 1 | Not-determined | Genome-fragment | NA   | 0     |
| S17-k141_161416                            | 1386  | No  | NA | 0    | 0 | Not-determined | Genome-fragment | NA   | 0     |
| S12-final-viral-combined_k141_319736[full] | 2483  | No  | NA | 1    | 0 | Low-quality    | Genome-fragment | 5.69 | 0     |
| S2-final-viral-combined_k141_35196[full]   | 2483  | No  | NA | 0    | 0 | Low-quality    | Genome-fragment | 1.81 | 0     |
| S2-final-viral-combined_k141_37654[full]   | 2483  | No  | NA | 1    | 0 | Low-quality    | Genome-fragment | 6.59 | 0     |
| S17-k141_151103                            | 1396  | No  | NA | 0    | 0 | Not-determined | Genome-fragment | NA   | 0     |
| S2-final-viral-combined_k141_129511[full]  | 2483  | No  | NA | 0    | 0 | Low-quality    | Genome-fragment | 5.93 | 0     |
| S17-k141_39591                             | 4865  | No  | NA | 0    | 1 | Not-determined | Genome-fragment | NA   |       |



|                                             |       |    |    |      |    |                |                 |    |       |
|---------------------------------------------|-------|----|----|------|----|----------------|-----------------|----|-------|
| S17-4141_85382                              | 3203  | No | NA | 0    | 2  | Not-determined | Genome-fragment | NA | 0     |
| S17-4141_49256                              | 8513  | No | NA | 0    | 18 | Not-determined | Genome-fragment | NA | 0     |
| S17-4141_239891                             | 3516  | No | NA | 0    | 1  | Not-determined | Genome-fragment | NA | 0     |
| S17-4141_151293                             | 1323  | No | NA | 0    | 1  | Not-determined | Genome-fragment | NA | 0     |
| S17-4141_207600                             | 1095  | No | NA | 0    | 1  | Not-determined | Genome-fragment | NA | 0     |
| S17-4141_39710                              | 2397  | No | NA | 0    | 0  | Not-determined | Genome-fragment | NA | 0     |
| S17-4141_73828                              | 1075  | No | NA | 0    | 0  | Not-determined | Genome-fragment | NA | 0     |
| S17-4141_106618                             | 6277  | No | NA | 0    | 1  | Not-determined | Genome-fragment | NA | 0     |
| S17-4141_151354                             | 1099  | No | NA | 0    | 1  | Not-determined | Genome-fragment | NA | 0     |
| S17-4141_173460                             | 1249  | No | NA | 0    | 0  | Not-determined | Genome-fragment | NA | 0     |
| S17-4141_28466                              | 1550  | No | NA | 0    | 1  | Not-determined | Genome-fragment | NA | 0     |
| S17-4141_36458                              | 1024  | No | NA | 0    | 0  | Not-determined | Genome-fragment | NA | 0     |
| S17-4141_151364                             | 1343  | No | NA | 0    | 1  | Not-determined | Genome-fragment | NA | 0     |
| S17-4141_49307                              | 3121  | No | NA | 0    | 4  | Not-determined | Genome-fragment | NA | 0     |
| S17-4141_229984                             | 2560  | No | NA | 0    | 1  | Not-determined | Genome-fragment | NA | 0     |
| S17-4141_49115                              | 3163  | No | NA | 0    | 0  | Not-determined | Genome-fragment | NA | 0     |
| S12-final-viral-combined_k141_362887  full  | 2484  | No | NA | 0    | 1  | Low-quality    | Genome-fragment | NA | 4.24  |
| S17-4141_28488                              | 1121  | No | NA | 0    | 0  | Not-determined | Genome-fragment | NA | 0     |
| S17-4141_49226                              | 2577  | No | NA | 0    | 1  | Not-determined | Genome-fragment | NA | 0     |
| S2-final-viral-combined_k141_115095  full   | 2485  | No | NA | 0    | 0  | Low-quality    | Genome-fragment | NA | 4.48  |
| S17-4141_49352                              | 2449  | No | NA | 0    | 1  | Not-determined | Genome-fragment | NA | 0     |
| S2_4141_78499                               | 2485  | No | NA | 0    | 0  | Low-quality    | Genome-fragment | NA | 4.15  |
| S17-4141_106671                             | 23575 | No | NA | 21   | 1  | Medium-quality | Genome-fragment | NA | 52.15 |
| S17-4141_106677                             | 2560  | No | NA | 0    | 0  | Not-determined | Genome-fragment | NA | 0     |
| S17-4141_73980                              | 1722  | No | NA | 0    | 2  | Not-determined | Genome-fragment | NA | 0     |
| S17-4141_62305                              | 2323  | No | NA | 0    | 1  | Not-determined | Genome-fragment | NA | 0     |
| S17-4141_129265                             | 1163  | No | NA | 0    | 1  | Not-determined | Genome-fragment | NA | 0     |
| S17-4141_28564                              | 1136  | No | NA | 0    | 1  | Not-determined | Genome-fragment | NA | 0     |
| S17-4141_129273                             | 3811  | No | NA | 0    | 0  | Not-determined | Genome-fragment | NA | 0     |
| S8_k141_60282                               | 2485  | No | NA | 0    | 1  | Low-quality    | Genome-fragment | NA | 1.28  |
| S17-4141_230051                             | 1666  | No | NA | 0    | 1  | Not-determined | Genome-fragment | NA | 0     |
| S11-final-viral-combined_k141_89701  H2gene | 2486  | No | NA | 1862 | 1  | Low-quality    | Genome-fragment | NA | 1.01  |
| S7-final-viral-combined_k141_97860  full    | 2486  | No | NA | 1    | 0  | Low-quality    | Genome-fragment | NA | 3.86  |
| S17-4141_230086                             | 1547  | No | NA | 0    | 1  | Not-determined | Genome-fragment | NA | 0     |
| S17-4141_214043                             | 1322  | No | NA | 0    | 1  | Not-determined | Genome-fragment | NA | 0     |
| S3-final-viral-combined_k141_127875  full   | 2487  | No | NA | 0    | 0  | Low-quality    | Genome-fragment | NA | 4.05  |
| S17-4141_219055                             | 1329  | No | NA | 0    | 1  | Not-determined | Genome-fragment | NA | 0     |
| S17-4141_85616                              | 1475  | No | NA | 0    | 2  | Not-determined | Genome-fragment | NA | 0     |
| S17-4141_219057                             | 3174  | No | NA | 0    | 0  | Not-determined | Genome-fragment | NA | 0     |
| S17-4141_62374                              | 2087  | No | NA | 0    | 2  | Not-determined | Genome-fragment | NA | 0     |
| S17-4141_28595                              | 2229  | No | NA | 0    | 1  | Not-determined | Genome-fragment | NA | 0     |
| S17-4141_28602                              | 1216  | No | NA | 0    | 1  | Not-determined | Genome-fragment | NA | 0     |
| S17-4141_161624                             | 4705  | No | NA | 0    | 3  | Not-determined | Genome-fragment | NA | 0     |
| S17-4141_85679                              | 1713  | No | NA | 0    | 1  | Not-determined | Genome-fragment | NA | 0     |
| S6-final-viral-combined_k141_86182  full    | 2487  | No | NA | 2    | 0  | Low-quality    | Genome-fragment | NA | 5.41  |
| S17-final-viral-combined_k141_198800  full  | 2487  | No | NA | 0    | 0  | Low-quality    | Genome-fragment | NA | 4.79  |
| S17-4141_261654                             | 2574  | No | NA | 0    | 3  | Not-determined | Genome-fragment | NA | 0     |
| S4-final-viral-combined_k141_130670  full   | 2487  | No | NA | 0    | 2  | Low-quality    | Genome-fragment | NA | 1.2   |
| S11-final-viral-combined_k141_189724  full  | 2488  | No | NA | 1    | 0  | Low-quality    | Genome-fragment | NA | 4.81  |
| S17-4141_49505                              | 1168  | No | NA | 0    | 1  | Not-determined | Genome-fragment | NA | 0     |
| S17-4141_119436                             | 2384  | No | NA | 0    | 2  | Not-determined | Genome-fragment | NA | 0     |
| S17-4141_16081                              | 1005  | No | NA | 0    | 1  | Not-determined | Genome-fragment | NA | 0     |
| S17-4141_129460                             | 2669  | No | NA | 0    | 0  | Not-determined | Genome-fragment | NA | 0     |
| S6-final-viral-combined_k141_40095  full    | 2488  | No | NA | 2    | 0  | Low-quality    | Genome-fragment | NA | 5.14  |
| S17-4141_119465                             | 1025  | No | NA | 0    | 1  | Not-determined | Genome-fragment | NA | 0     |
| S17-4141_161740                             | 1359  | No | NA | 0    | 0  | Not-determined | Genome-fragment | NA | 0     |
| S6_k141_34122                               | 2488  | No | NA | 1    | 0  | Low-quality    | Genome-fragment | NA | 4.31  |
| S17-4141_261731                             | 5434  | No | NA | 0    | 2  | Not-determined | Genome-fragment | NA | 0     |
| S17-4141_106641                             | 1707  | No | NA | 0    | 1  | Not-determined | Genome-fragment | NA | 0     |
| S11-final-viral-combined_k141_8491  H2gene  | 2489  | No | NA | 1    | 0  | Low-quality    | Genome-fragment | NA | 1.54  |
| S17-4141_28725                              | 2954  | No | NA | 0    | 0  | Not-determined | Genome-fragment | NA | 0     |
| S17-4141_161770                             | 1217  | No | NA | 0    | 2  | Not-determined | Genome-fragment | NA | 0     |
| S17-4141_6570                               | 1334  | No | NA | 0    | 1  | Not-determined | Genome-fragment | NA | 0     |
| S12-final-viral-combined_k141_338951  full  | 2489  | No | NA | 0    | 2  | Low-quality    | Genome-fragment | NA | 4.16  |
| S17-4141_250421                             | 1222  | No | NA | 0    | 1  | Not-determined | Genome-fragment | NA | 0     |
| S12-final-viral-combined_k141_49354  full   | 2489  | No | NA | 0    | 0  | Low-quality    | Genome-fragment | NA | 5.32  |
| S17-4141_161799                             | 1156  | No | NA | 0    | 2  | Not-determined | Genome-fragment | NA | 0     |
| S17-4141_230238                             | 1609  | No | NA | 0    | 0  | Not-determined | Genome-fragment | NA | 0     |
| S17-4141_49036                              | 1468  | No | NA | 0    | 1  | Not-determined | Genome-fragment | NA | 0     |
| S17-4141_250435                             | 5307  | No | NA | 0    | 2  | Not-determined | Genome-fragment | NA | 0     |
| S8-final-viral-combined_k141_128782  full   | 2489  | No | NA | 4    | 0  | Low-quality    | Genome-fragment | NA | 5.43  |
| S17-4141_196694                             | 1102  | No | NA | 0    | 0  | Not-determined | Genome-fragment | NA | 0     |
| S3-final-viral-combined_k141_43548  full    | 2490  | No | NA | 2    | 0  | Low-quality    | Genome-fragment | NA | 6.71  |
| S17-4141_75492                              | 2490  | No | NA | 0    | 1  | Low-quality    | Genome-fragment | NA | 0.66  |
| S12-final-viral-combined_k141_152564  full  | 2490  | No | NA | 0    | 0  | Low-quality    | Genome-fragment | NA | 6.68  |
| S17-4141_161858                             | 1063  | No | NA | 0    | 0  | Not-determined | Genome-fragment | NA | 0     |
| S17-4141_161859                             | 1432  | No | NA | 0    | 0  | Not-determined | Genome-fragment | NA | 0     |
| S17-4141_28785                              | 3205  | No | NA | 0    | 2  | Not-determined | Genome-fragment | NA | 0     |
| S17-4141_240275                             | 5786  | No | NA | 0    | 7  | Not-determined | Genome-fragment | NA | 0     |
| S17-4141_261823                             | 1525  | No | NA | 0    | 1  | Not-determined | Genome-fragment | NA | 0     |
| S17-4141_74140                              | 1067  | No | NA | 0    | 1  | Not-determined | Genome-fragment | NA | 0     |
| S17-4141_49193                              | 1025  | No | NA | 0    | 0  | Not-determined | Genome-fragment | NA | 0     |
| S17-4141_49595                              | 1085  | No | NA | 0    | 1  | Not-determined | Genome-fragment | NA | 0     |
| S17-4141_16933                              | 1960  | No | NA | 0    | 4  | Not-determined | Genome-fragment | NA | 0     |
| S17-4141_161872                             | 1247  | No | NA | 0    | 1  | Not-determined | Genome-fragment | NA | 0     |
| S6-final-viral-combined_k141_42489  full    | 2490  | No | NA | 0    | 1  | Low-quality    | Genome-fragment | NA | 8.35  |
| S17-4141_119695                             | 1072  | No | NA | 0    | 1  | Not-determined | Genome-fragment | NA | 0     |
| S17-4141_230345                             | 1095  | No | NA | 0    | 1  | Not-determined | Genome-fragment | NA | 0     |
| S17-4141_119706                             | 1130  | No | NA | 0    | 1  | Not-determined | Genome-fragment | NA | 0     |
| S17-4141_161928                             | 1017  | No | NA | 0    | 0  | Not-determined | Genome-fragment | NA | 0     |
| S17-4141_230371                             | 1148  | No | NA | 0    | 0  | Not-determined | Genome-fragment | NA | 0     |
| S17-4141_240305                             | 1602  | No | NA | 0    | 1  | Not-determined | Genome-fragment | NA | 0     |
| S17-4141_28884                              | 1575  | No | NA | 0    | 1  | Not-determined | Genome-fragment | NA | 0     |
| S17-4141_161956                             | 1464  | No | NA | 0    | 4  | Not-determined | Genome-fragment | NA | 0     |
| S17-4141_173989                             | 5744  | No | NA | 0    | 1  | Not-determined | Genome-fragment | NA | 0     |
| S17-4141_28915                              | 1400  | No | NA | 0    | 0  | Not-determined | Genome-fragment | NA | 0     |
| S17-4141_161971                             | 1229  | No | NA | 0    | 1  | Not-determined | Genome-fragment | NA | 0     |
| S17-4141_261937                             | 1779  | No | NA | 0    | 1  | Not-determined | Genome-fragment | NA | 0     |
| S11_k141_151365                             | 2451  | No | NA | 0    | 0  | Low-quality    | Genome-fragment | NA | 2.34  |
| S17-4141_219348                             | 1400  | No | NA | 0    | 0  | Not-determined | Genome-fragment | NA | 0     |
| S17-4141_230442                             | 1580  | No | NA | 0    | 2  | Not-determined | Genome-fragment | NA | 0     |
| S17-4141_230446                             | 1018  | No | NA | 0    | 2  | Not-determined | Genome-fragment | NA | 0     |
| S17-4141_140847                             | 1179  | No | NA | 0    | 1  | Not-determined | Genome-fragment | NA | 0     |
| S17-4141_208113                             | 1215  | No | NA | 0    | 1  | Not-determined | Genome-fragment | NA | 0     |
| S17-4141_161992                             | 1028  | No | NA | 0    | 1  | Not-determined | Genome-fragment | NA | 0     |
| S17-4141_119812                             | 1081  | No | NA | 0    | 3  | Not-determined | Genome-fragment | NA | 0     |
| S17-4141_40253                              | 1016  | No | NA | 0    | 0  | Not-determined | Genome-fragment | NA | 0     |
| S17-4141_74272                              | 1963  | No | NA | 0    | 1  | Not-determined | Genome-fragment | NA | 0     |
| S17-4141_208140                             | 1317  | No | NA | 0    | 1  | Not-determined | Genome-fragment | NA | 0     |
| S17-4141_151871                             | 1531  | No | NA | 0    | 1  | Not-determined | Genome-fragment | NA | 0     |
| S17-4141_49750                              | 6421  | No | NA | 0    | 7  | Not-determined | Genome-fragment | NA | 0     |
| S17-4141_171070                             | 1075  | No | NA | 0    | 0  | Not-determined | Genome-fragment | NA | 0     |
| S17-4141_140927                             | 1300  | No | NA | 0    | 1  | Not-determined | Genome-fragment | NA | 0     |
| S1-final-viral-combined_k141_137784  full   | 2491  | No | NA | 0    | 1  | Low-quality    | Genome-fragment | NA | 1.33  |
| S17-4141_219414                             | 1450  | No | NA | 0    | 2  | Low-quality    | Genome-fragment | NA | 0     |
| S17-4141_262033                             | 4065  | No | NA | 0    | 3  | Not-determined | Genome-fragment | NA | 0     |
| S17-4141_107086                             | 9945  | No | NA | 0    | 14 | Not-determined | Genome-fragment | NA | 0     |
| S17-4141_28938                              | 1467  | No | NA | 0    | 2  | Not-determined | Genome-fragment | NA | 0     |
| S1-final-viral-combined_k141_290543  full   | 2491  | No | NA | 0    | 1  | Low-quality    | Genome-fragment | NA | 1.66  |
| S17-4141_230579                             | 3099  | No | NA | 0    | 1  | Not-determined | Genome-fragment | NA | 0     |
| S17-4141_140963                             | 1399  | No | NA | 0    | 2  | Not-determined | Genome-fragment | NA | 0     |
| S3-final-viral-combined_k141_120053  full   | 2451  | No | NA | 0    | 1  | Low-quality    | Genome-fragment | NA | 0.73  |
| S7-final-viral-combined_k141_202039  full   | 2491  | No | NA | 0    | 0  | Low-quality    | Genome-fragment | NA | 2.05  |
| S17-4141_129767                             | 1307  | No | NA | 0    | 2  | Not-determined | Genome-fragment | NA | 0     |
| S17-4141_196916                             | 3305  | No | NA | 0    | 1  | Not-determined | Genome-fragment | NA | 0     |
| S17-final-viral-combined_k141_242109  full  | 2491  | No | NA | 0    | 0  | Low-quality    | Genome-fragment | NA | 3.39  |
| S17-4141_17103                              | 11297 | No | NA | 0    | 1  | Not-determined | Genome-fragment | NA | 0     |
| S17-4141_107144                             | 1538  | No | NA | 0    | 0  | Not-determined | Genome-fragment | NA | 0     |
| S17-4141_74413                              | 1190  | No | NA | 0    | 2  | Not-determined | Genome-fragment | NA | 0     |
| S17-4141_74416                              | 1021  | No | NA | 0    | 2  | Not-determined | Genome-fragment | NA | 0     |
| S17-4141_219529                             | 1149  | No | NA | 0    | 1  | Not-determined | Genome-fragment | NA | 0     |
| S12-final-viral-combined_k141_222692  full  | 2451  | No | NA | 2    | 0  | Low-quality    | Genome-fragment | NA | 5.25  |
| S17-4141_230675                             | 1128  | No | NA | 0    | 0  | Not-determined | Genome-fragment | NA | 0     |
| S2-final-viral-combined_k141_241874  full   | 2491  | No | NA | 0    | 1  | Low-quality    | Genome-fragment | NA | 5.69  |
| S11_k141_70335                              | 2492  | No | NA | 0    | 2  | Low-quality    | Genome-fragment | NA | 0.93  |
| S5-final-viral-combined_k141_23874  full    | 2492  | No | NA | 2    | 0  | Low-quality    | Genome-fragment | NA | 4.02  |
| S17-4141_162071                             | 1174  | No | NA | 0    | 1  | Not-determined | Genome-fragment | NA | 0     |
| S17-4141_162077                             | 1066  | No | NA | 0    | 1  | Not-determined | Genome-fragment | NA | 0     |
| S7-final-viral-combined_k141_154232  full   | 2492  | No | NA | 3    | 0  | Low-quality    | Genome-fragment | NA | 6.28  |
| S17-4141_262136                             | 1462  | No | NA | 0    | 1  | Not-determined | Genome-fragment | NA | 0     |
| S17-4141_262140                             | 6230  | No | NA | 0    | 3  | Not-determined | Genome-fragment | NA | 0     |
| S17-4141_230781                             | 1051  | No | NA | 0    | 1  | Not-determined | Genome-fragment | NA | 0     |
| S17-4141_86145                              | 1236  | No | NA | 0    | 1  | Not-determined | Genome-fragment | NA | 0     |
| S17-4141_129876</                           |       |    |    |      |    |                |                 |    |       |



|                                             |       |     |    |   |   |                |                 |    |       |
|---------------------------------------------|-------|-----|----|---|---|----------------|-----------------|----|-------|
| S17-k141_29092                              | 1615  | No  | NA | 0 | 1 | Not-determined | Genome-fragment | NA | 0     |
| S17-k141_262302                             | 1797  | No  | NA | 0 | 0 | Not-determined | Genome-fragment | NA | 0     |
| S17-k141_208562                             | 2715  | No  | NA | 0 | 0 | Not-determined | Genome-fragment | NA | 0     |
| S17-k141_219728                             | 1581  | No  | NA | 0 | 0 | Not-determined | Genome-fragment | NA | 0     |
| S11-final-viral-combined_k141_83201  full   | 2495  | No  | NA | 0 | 0 | Low-quality    | Genome-fragment | NA | 8.2   |
| S17-k141_186275                             | 1324  | No  | NA | 0 | 1 | Not-determined | Genome-fragment | NA | 0     |
| S17-k141_174512                             | 1257  | No  | NA | 0 | 0 | Not-determined | Genome-fragment | NA | 0     |
| S17-k141_230975                             | 1203  | No  | NA | 0 | 0 | Not-determined | Genome-fragment | NA | 0     |
| S17-k141_219792                             | 1488  | No  | NA | 0 | 1 | Not-determined | Genome-fragment | NA | 0     |
| S11-final-viral-combined_k141_187068  full  | 2495  | No  | NA | 0 | 0 | Low-quality    | Genome-fragment | NA | 6.17  |
| S17-k141_86417                              | 1289  | No  | NA | 0 | 0 | Not-determined | Genome-fragment | NA | 0     |
| S17-k141_231002                             | 5135  | No  | NA | 0 | 3 | Not-determined | Genome-fragment | NA | 0     |
| S17-k141_74737                              | 1077  | No  | NA | 0 | 0 | Not-determined | Genome-fragment | NA | 0     |
| S17-k141_291262                             | 1016  | No  | NA | 0 | 0 | Not-determined | Genome-fragment | NA | 0     |
| S17-k141_152252                             | 1833  | No  | NA | 0 | 2 | Not-determined | Genome-fragment | NA | 0     |
| S5-final-viral-combined_k141_61757  full    | 2495  | No  | NA | 1 | 0 | Low-quality    | Genome-fragment | NA | 5.08  |
| S17-k141_262385                             | 1133  | No  | NA | 0 | 0 | Not-determined | Genome-fragment | NA | 0     |
| S17-k141_147466                             | 1129  | No  | NA | 0 | 0 | Not-determined | Genome-fragment | NA | 0     |
| S17-k141_17486                              | 1265  | No  | NA | 0 | 1 | Not-determined | Genome-fragment | NA | 0     |
| S17-k141_141484                             | 3026  | No  | NA | 0 | 8 | Not-determined | Genome-fragment | NA | 0     |
| S7_k141_41712                               | 2495  | No  | NA | 0 | 0 | Low-quality    | Genome-fragment | NA | 2.37  |
| S12-final-viral-combined_k141_286860  full  | 2495  | No  | NA | 1 | 0 | Low-quality    | Genome-fragment | NA | 4.81  |
| S17-k141_74802                              | 5917  | No  | NA | 0 | 1 | Not-determined | Genome-fragment | NA | 0     |
| S17-k141_174684                             | 1342  | No  | NA | 0 | 2 | Not-determined | Genome-fragment | NA | 0     |
| S17-k141_250950                             | 1092  | No  | NA | 0 | 3 | Not-determined | Genome-fragment | NA | 0     |
| S11-final-viral-combined_k141_155290  full  | 2496  | No  | NA | 3 | 0 | Low-quality    | Genome-fragment | NA | 4.3   |
| S17-k141_208772                             | 1137  | No  | NA | 0 | 0 | Not-determined | Genome-fragment | NA | 0     |
| S17-k141_147415                             | 4147  | No  | NA | 0 | 5 | Not-determined | Genome-fragment | NA | 0     |
| S17-k141_50102                              | 5811  | No  | NA | 0 | 3 | Not-determined | Genome-fragment | NA | 0     |
| S8-final-viral-combined_k141_153191  full   | 2497  | No  | NA | 1 | 0 | Low-quality    | Genome-fragment | NA | 6.14  |
| S17-k141_162463                             | 2011  | No  | NA | 0 | 2 | Not-determined | Genome-fragment | NA | 0     |
| S17-k141_174549                             | 1043  | No  | NA | 0 | 1 | Not-determined | Genome-fragment | NA | 0     |
| S17-k141_162484                             | 4116  | No  | NA | 0 | 1 | Not-determined | Genome-fragment | NA | 0     |
| S17-k141_74877                              | 3329  | No  | NA | 0 | 3 | Not-determined | Genome-fragment | NA | 0     |
| S17-k141_120310                             | 1068  | No  | NA | 0 | 2 | Not-determined | Genome-fragment | NA | 0     |
| S17-k141_208815                             | 3267  | No  | NA | 0 | 0 | Not-determined | Genome-fragment | NA | 0     |
| S17-k141_141551                             | 1477  | No  | NA | 0 | 1 | Not-determined | Genome-fragment | NA | 0     |
| S11_k141_179336                             | 2498  | No  | NA | 1 | 0 | Low-quality    | Genome-fragment | NA | 4     |
| S17-k141_7000                               | 8088  | No  | NA | 0 | 4 | Not-determined | Genome-fragment | NA | 0     |
| S17-k141_120369                             | 1339  | No  | NA | 0 | 1 | Not-determined | Genome-fragment | NA | 0     |
| S17-k141_186391                             | 13965 | No  | NA | 0 | 1 | Not-determined | Genome-fragment | NA | 0     |
| S17-k141_186395                             | 1025  | No  | NA | 0 | 1 | Not-determined | Genome-fragment | NA | 0     |
| S1-final-viral-combined_k141_265445  H2gene | 2498  | No  | NA | 1 | 0 | Low-quality    | Genome-fragment | NA | 4.41  |
| S12-final-viral-combined_k141_157385  full  | 2498  | No  | NA | 0 | 0 | Low-quality    | Genome-fragment | NA | 4.14  |
| S17-k141_240868                             | 1023  | No  | NA | 0 | 0 | Not-determined | Genome-fragment | NA | 0     |
| S17-k141_63360                              | 1130  | No  | NA | 0 | 1 | Not-determined | Genome-fragment | NA | 0     |
| S17-k141_120384                             | 2052  | No  | NA | 0 | 1 | Not-determined | Genome-fragment | NA | 0     |
| S17-k141_86582                              | 2213  | No  | NA | 0 | 3 | Not-determined | Genome-fragment | NA | 0     |
| S17-k141_107626                             | 3461  | No  | NA | 0 | 2 | Not-determined | Genome-fragment | NA | 0     |
| S8-final-viral-combined_k141_220612  full   | 2498  | No  | NA | 1 | 0 | Low-quality    | Genome-fragment | NA | 5.45  |
| S17-k141_107631                             | 1316  | No  | NA | 0 | 1 | Not-determined | Genome-fragment | NA | 0     |
| S17-k141_197566                             | 3601  | No  | NA | 0 | 4 | Not-determined | Genome-fragment | NA | 0     |
| S17-k141_63393                              | 1680  | No  | NA | 0 | 0 | Not-determined | Genome-fragment | NA | 0     |
| S17-k141_197605                             | 1049  | No  | NA | 0 | 0 | Not-determined | Genome-fragment | NA | 0     |
| S17-k141_220009                             | 1306  | No  | NA | 0 | 2 | Not-determined | Genome-fragment | NA | 0     |
| S17-k141_50131                              | 3047  | No  | NA | 0 | 0 | Not-determined | Genome-fragment | NA | 0     |
| S17-k141_86650                              | 1008  | No  | NA | 0 | 1 | Not-determined | Genome-fragment | NA | 0     |
| S5-final-viral-combined_k141_141550  H2gene | 2499  | No  | NA | 1 | 0 | Low-quality    | Genome-fragment | NA | 1.43  |
| S2-final-viral-combined_k141_112956  full   | 2499  | No  | NA | 0 | 0 | Low-quality    | Genome-fragment | NA | 1.67  |
| S17-k141_95060                              | 1144  | No  | NA | 0 | 2 | Not-determined | Genome-fragment | NA | 0     |
| S17-k141_141672                             | 1288  | No  | NA | 0 | 2 | Not-determined | Genome-fragment | NA | 0     |
| S17-k141_231284                             | 1713  | No  | NA | 0 | 0 | Not-determined | Genome-fragment | NA | 0     |
| S17-k141_40493                              | 1645  | No  | NA | 0 | 1 | Not-determined | Genome-fragment | NA | 0     |
| S11-final-viral-combined_k141_137063  full  | 2500  | No  | NA | 0 | 1 | Low-quality    | Genome-fragment | NA | 1.06  |
| S1-final-viral-combined_k141_336982  H2gene | 2500  | No  | NA | 2 | 0 | Low-quality    | Genome-fragment | NA | 5.28  |
| S17-k141_262594                             | 1412  | No  | NA | 0 | 1 | Not-determined | Genome-fragment | NA | 0     |
| S17-k141_95071                              | 1665  | No  | NA | 0 | 1 | Not-determined | Genome-fragment | NA | 0     |
| S17-k141_63432                              | 3330  | No  | NA | 0 | 0 | Not-determined | Genome-fragment | NA | 0     |
| S17-k141_95095                              | 2160  | No  | NA | 0 | 0 | Not-determined | Genome-fragment | NA | 0     |
| S17-k141_186534                             | 1994  | No  | NA | 0 | 2 | Not-determined | Genome-fragment | NA | 0     |
| S17-k141_186548                             | 1004  | No  | NA | 0 | 0 | Not-determined | Genome-fragment | NA | 0     |
| S17-k141_7062                               | 3711  | No  | NA | 0 | 1 | Not-determined | Genome-fragment | NA | 0     |
| S7-final-viral-combined_k141_244481  full   | 2500  | No  | NA | 0 | 0 | Low-quality    | Genome-fragment | NA | 4.39  |
| S17-k141_240987                             | 3380  | No  | NA | 0 | 1 | Not-determined | Genome-fragment | NA | 0     |
| S17-k141_262618                             | 1213  | No  | NA | 0 | 1 | Not-determined | Genome-fragment | NA | 0     |
| S17-k141_152507                             | 1010  | No  | NA | 0 | 1 | Not-determined | Genome-fragment | NA | 0     |
| S17-k141_80845                              | 2500  | No  | NA | 0 | 2 | Low-quality    | Genome-fragment | NA | 5.1   |
| S12-final-viral-combined_k141_83591  full   | 2500  | No  | NA | 0 | 2 | Low-quality    | Genome-fragment | NA | 1.62  |
| S17-k141_50181                              | 14077 | No  | NA | 0 | 0 | Not-determined | Genome-fragment | NA | 0     |
| S17-k141_86723                              | 1164  | No  | NA | 0 | 1 | Not-determined | Genome-fragment | NA | 0     |
| S17-k141_231325                             | 1209  | No  | NA | 0 | 1 | Not-determined | Genome-fragment | NA | 0     |
| S17-k141_220162                             | 1490  | No  | NA | 0 | 1 | Not-determined | Genome-fragment | NA | 0     |
| S8-final-viral-combined_k141_29961  full    | 2500  | No  | NA | 2 | 0 | Low-quality    | Genome-fragment | NA | 1.58  |
| S17-k141_186603                             | 1483  | No  | NA | 0 | 1 | Not-determined | Genome-fragment | NA | 0     |
| S1-final-viral-combined_k141_280592  full   | 2501  | No  | NA | 0 | 2 | Low-quality    | Genome-fragment | NA | 2.47  |
| S17-k141_197713                             | 2547  | No  | NA | 0 | 2 | Not-determined | Genome-fragment | NA | 0     |
| S17-k141_231351                             | 1904  | No  | NA | 0 | 2 | Not-determined | Genome-fragment | NA | 0     |
| S17-k141_231381                             | 18660 | No  | NA | 0 | 3 | Not-determined | Genome-fragment | NA | 0     |
| S17-k141_231401                             | 1211  | No  | NA | 0 | 0 | Not-determined | Genome-fragment | NA | 0     |
| S1-final-viral-combined_k141_259641  full   | 2501  | No  | NA | 0 | 0 | Low-quality    | Genome-fragment | NA | 5.73  |
| S5-final-viral-combined_k141_160464  full   | 2501  | No  | NA | 1 | 0 | Low-quality    | Genome-fragment | NA | 5.72  |
| S17-k141_63596                              | 1417  | No  | NA | 0 | 1 | Not-determined | Genome-fragment | NA | 0     |
| S17-k141_95142                              | 1112  | No  | NA | 0 | 0 | Not-determined | Genome-fragment | NA | 0     |
| S17-k141_186691                             | 2243  | No  | NA | 0 | 1 | Not-determined | Genome-fragment | NA | 0     |
| S17-k141_251153                             | 1096  | No  | NA | 0 | 2 | Not-determined | Genome-fragment | NA | 0     |
| S7-final-viral-combined_k141_147966  full   | 2501  | No  | NA | 3 | 0 | Low-quality    | Genome-fragment | NA | 5.37  |
| S17-k141_162761                             | 5869  | No  | NA | 0 | 1 | Not-determined | Genome-fragment | NA | 0     |
| S17-k141_251170                             | 1212  | No  | NA | 0 | 1 | Not-determined | Genome-fragment | NA | 0     |
| S17-k141_17835                              | 1539  | No  | NA | 0 | 1 | Not-determined | Genome-fragment | NA | 0     |
| S17-k141_75245                              | 1047  | No  | NA | 0 | 1 | Not-determined | Genome-fragment | NA | 0     |
| S17-k141_152567                             | 1387  | No  | NA | 0 | 0 | Not-determined | Genome-fragment | NA | 0     |
| S17-k141_7269                               | 1797  | No  | NA | 0 | 1 | Not-determined | Genome-fragment | NA | 0     |
| S17-k141_209134                             | 3880  | No  | NA | 0 | 5 | Not-determined | Genome-fragment | NA | 0     |
| S17-k141_29667                              | 1020  | No  | NA | 0 | 2 | Not-determined | Genome-fragment | NA | 0     |
| S17-k141_120670                             | 1278  | No  | NA | 0 | 2 | Not-determined | Genome-fragment | NA | 0     |
| S17-k141_40713                              | 1440  | No  | NA | 0 | 2 | Not-determined | Genome-fragment | NA | 0     |
| S17-k141_120698                             | 1037  | No  | NA | 0 | 1 | Not-determined | Genome-fragment | NA | 0     |
| S17-k141_40738                              | 1183  | No  | NA | 0 | 0 | Not-determined | Genome-fragment | NA | 0     |
| S12-final-viral-combined_k141_359350  full  | 2501  | No  | NA | 2 | 0 | Low-quality    | Genome-fragment | NA | 6.18  |
| S17-k141_175029                             | 2431  | No  | NA | 0 | 2 | Not-determined | Genome-fragment | NA | 0     |
| S17-k141_220440                             | 1389  | No  | NA | 0 | 2 | Not-determined | Genome-fragment | NA | 0     |
| S17-k141_251222                             | 1419  | No  | NA | 0 | 2 | Not-determined | Genome-fragment | NA | 0     |
| S17-k141_107851                             | 4088  | No  | NA | 0 | 0 | Not-determined | Genome-fragment | NA | 0     |
| S1-final-viral-combined_k141_225538  full   | 2502  | No  | NA | 0 | 1 | Low-quality    | Genome-fragment | NA | 1.83  |
| S8-final-viral-combined_k141_116802  full   | 2502  | Yes | NA | 1 | 0 | Low-quality    | Genome-fragment | NA | 4.26  |
| S17-k141_40756                              | 5364  | No  | NA | 1 | 0 | Not-determined | Genome-fragment | NA | 0     |
| S8-final-viral-combined_k141_168831  full   | 2502  | No  | NA | 2 | 0 | Low-quality    | Genome-fragment | NA | 7.27  |
| S17-k141_262684                             | 1090  | No  | NA | 0 | 1 | Not-determined | Genome-fragment | NA | 0     |
| S17-k141_17325                              | 1462  | No  | NA | 0 | 1 | Not-determined | Genome-fragment | NA | 0     |
| S17-k141_182776                             | 2503  | No  | NA | 0 | 1 | Low-quality    | Genome-fragment | NA | 1.39  |
| S12-final-viral-combined_k141_398536  full  | 2503  | Yes | NA | 1 | 1 | Low-quality    | Genome-fragment | NA | 2.99  |
| S17-k141_75374                              | 1006  | No  | NA | 0 | 0 | Not-determined | Genome-fragment | NA | 41.63 |
| S4-final-viral-combined_k141_39491  full    | 2503  | No  | NA | 0 | 1 | Low-quality    | Genome-fragment | NA | 3.66  |
| S17-k141_87024                              | 4529  | No  | NA | 0 | 3 | Not-determined | Genome-fragment | NA | 0     |
| S17-k141_87038                              | 1060  | No  | NA | 0 | 1 | Not-determined | Genome-fragment | NA | 0     |
| S17-k141_141939                             | 1681  | No  | NA | 0 | 1 | Not-determined | Genome-fragment | NA | 0     |
| S17-k141_162806                             | 1301  | No  | NA | 0 | 1 | Not-determined | Genome-fragment | NA | 0     |
| S17-k141_241338                             | 2513  | No  | NA | 0 | 1 | Not-determined | Genome-fragment | NA | 0     |
| S17-k141_75471                              | 1374  | No  | NA | 0 | 1 | Not-determined | Genome-fragment | NA | 0     |
| S17-k141_152781                             | 2383  | No  | NA | 0 | 2 | Not-determined | Genome-fragment | NA | 0     |
| S4_k141_143841                              | 2503  | No  | NA | 0 | 0 | Low-quality    | Genome-fragment | NA | 2.53  |
| S17-k141_29749                              | 1075  | No  | NA | 0 | 1 | Not-determined | Genome-fragment | NA | 0     |
| S8-final-viral-combined_k141_255182  full   | 2503  | No  | NA | 0 | 1 | Low-quality    | Genome-fragment | NA | 4.11  |
| S17-k141_175221                             | 1633  | No  | NA | 0 | 0 | Not-determined | Genome-fragment | NA | 0     |
| S17-k141_50147                              | 4449  | No  | NA | 0 | 3 | Not-determined | Genome-fragment | NA | 0     |
| S17-k141_198034                             | 1245  | No  | NA | 0 | 1 | Not-determined | Genome-fragment | NA | 0     |
| S17-k141_162876                             | 1498  | No  | NA | 0 | 1 | Not-determined | Genome-fragment | NA | 0     |
| S7-final-viral-combined_k141_54961  full    | 2504  | No  | NA | 1 | 0 | Low-quality    | Genome-fragment | NA | 6.78  |
| S2-final-viral-combined_k141_57615  full    | 2504  | No  | NA | 1 | 0 | Low-quality    | Genome-fragment | NA | 1.49  |
| S17-k141_262821                             | 1135  | No  | NA | 0 | 1 | Not-determined | Genome-fragment | NA | 0     |
| S2-final-viral-combined_k141_215814  full   | 2504  | No  | NA | 0 | 2 | Low-quality    | Genome-fragment | NA | 1.93  |
| S17-k141_7499                               | 1155  | No  | NA | 0 | 0 | Not-determined | Genome-fragment | NA | 0     |
| S1-final-viral-combined_k141_64894  full    | 2505  | No  | NA | 0 | 0 | Low-quality    | Genome-fragment | NA | 5.35  |
| S17-k141_220610                             | 1017  | No  | NA | 0 | 1 | Not-determined | Genome-fragment | NA | 0     |
| S17                                         |       |     |    |   |   |                |                 |    |       |



|                                              |       |    |    |   |   |                |                 |    |      |
|----------------------------------------------|-------|----|----|---|---|----------------|-----------------|----|------|
| S17-k141_142204                              | 1162  | No | NA | 0 | 1 | Not-determined | Genome-fragment | NA | 0    |
| S17-k141_25455                               | 3162  | No | NA | 0 | 2 | Not-determined | Genome-fragment | NA | 0    |
| S17-k141_18193                               | 2571  | No | NA | 0 | 2 | Not-determined | Genome-fragment | NA | 0    |
| S17-k141_7666                                | 2632  | No | NA | 0 | 1 | Not-determined | Genome-fragment | NA | 0    |
| S17-k141_153030                              | 2787  | No | NA | 0 | 2 | Not-determined | Genome-fragment | NA | 0    |
| S4_k141_74688                                | 2506  | No | NA | 1 | 0 | Low-quality    | Genome-fragment | NA | 2.62 |
| S17-k141_153056                              | 1851  | No | NA | 0 | 2 | Not-determined | Genome-fragment | NA | 0    |
| S17-k141_187122                              | 1957  | No | NA | 0 | 0 | Not-determined | Genome-fragment | NA | 0    |
| S17-k141_263009                              | 4374  | No | NA | 0 | 2 | Not-determined | Genome-fragment | NA | 0    |
| S17-k141_95518                               | 1389  | No | NA | 0 | 1 | Not-determined | Genome-fragment | NA | 0    |
| S17-k141_231875                              | 4864  | No | NA | 0 | 3 | Not-determined | Genome-fragment | NA | 0    |
| S6-final-viral-combined_k141_09848  full     | 2506  | No | NA | 0 | 2 | Low-quality    | Genome-fragment | NA | 1.21 |
| S1-final-viral-combined_k141_100695  full    | 2507  | No | NA | 1 | 0 | Low-quality    | Genome-fragment | NA | 6.99 |
| S17-k141_108229                              | 2636  | No | NA | 0 | 2 | Not-determined | Genome-fragment | NA | 0    |
| S17-final-viral-combined_k141_72173  full    | 2507  | No | NA | 2 | 0 | Low-quality    | Genome-fragment | NA | 6.44 |
| S17-k141_241612                              | 1629  | No | NA | 0 | 0 | Not-determined | Genome-fragment | NA | 0    |
| S17-k141_18259                               | 1292  | No | NA | 0 | 0 | Not-determined | Genome-fragment | NA | 0    |
| S17-k141_142232                              | 1039  | No | NA | 0 | 0 | Not-determined | Genome-fragment | NA | 0    |
| S17-k141_241656                              | 1272  | No | NA | 0 | 1 | Not-determined | Genome-fragment | NA | 0    |
| S17-k141_209479                              | 7129  | No | NA | 0 | 2 | Not-determined | Genome-fragment | NA | 0    |
| S17-k141_41009                               | 1022  | No | NA | 0 | 1 | Not-determined | Genome-fragment | NA | 0    |
| S17-k141_187188                              | 3710  | No | NA | 0 | 1 | Not-determined | Genome-fragment | NA | 0    |
| S17-k141_7743                                | 1621  | No | NA | 0 | 0 | Not-determined | Genome-fragment | NA | 0    |
| S12-final-viral-combined_k141_22800  full    | 2507  | No | NA | 0 | 0 | Low-quality    | Genome-fragment | NA | 6.91 |
| S4-final-viral-combined_k141_1287  full      | 2507  | No | NA | 0 | 0 | Low-quality    | Genome-fragment | NA | 4.13 |
| S4-final-viral-combined_k141_39215  full     | 2507  | No | NA | 0 | 0 | Low-quality    | Genome-fragment | NA | 3.94 |
| S4_k141_144018                               | 2507  | No | NA | 0 | 0 | Low-quality    | Genome-fragment | NA | 2.33 |
| S17-k141_30046                               | 1251  | No | NA | 0 | 1 | Not-determined | Genome-fragment | NA | 0    |
| S4-final-viral-combined_k141_97471  full     | 2508  | No | NA | 2 | 0 | Low-quality    | Genome-fragment | NA | 14.5 |
| S17-k141_198286                              | 2356  | No | NA | 0 | 1 | Not-determined | Genome-fragment | NA | 0    |
| S17-k141_175564                              | 1463  | No | NA | 0 | 1 | Not-determined | Genome-fragment | NA | 0    |
| S17-k141_75908                               | 1057  | No | NA | 0 | 1 | Not-determined | Genome-fragment | NA | 0    |
| S17-k141_187272                              | 2083  | No | NA | 0 | 0 | Not-determined | Genome-fragment | NA | 0    |
| S17-k141_263145                              | 1369  | No | NA | 0 | 0 | Not-determined | Genome-fragment | NA | 0    |
| S6-final-viral-combined_k141_68562  full     | 2508  | No | NA | 2 | 0 | Low-quality    | Genome-fragment | NA | 7.26 |
| S17-k141_7812                                | 5477  | No | NA | 0 | 1 | Not-determined | Genome-fragment | NA | 0    |
| S8_k141_210455                               | 2508  | No | NA | 0 | 0 | Low-quality    | Genome-fragment | NA | 2.2  |
| S17-k141_142469                              | 3175  | No | NA | 0 | 2 | Not-determined | Genome-fragment | NA | 0    |
| S17-k141_187319                              | 1397  | No | NA | 0 | 1 | Not-determined | Genome-fragment | NA | 0    |
| S17-k141_263189                              | 1673  | No | NA | 0 | 1 | Not-determined | Genome-fragment | NA | 0    |
| S17-k141_209593                              | 1373  | No | NA | 0 | 0 | Not-determined | Genome-fragment | NA | 0    |
| S17-k141_162362                              | 1113  | No | NA | 0 | 1 | Not-determined | Genome-fragment | NA | 0    |
| S17-k141_130463                              | 4393  | No | NA | 0 | 3 | Not-determined | Genome-fragment | NA | 0    |
| S17-k141_130465                              | 5054  | No | NA | 0 | 2 | Not-determined | Genome-fragment | NA | 0    |
| S17-k141_30123                               | 2562  | No | NA | 0 | 2 | Not-determined | Genome-fragment | NA | 0    |
| S1_k141_38876                                | 2509  | No | NA | 0 | 1 | Low-quality    | Genome-fragment | NA | 0.68 |
| S17-k141_263245                              | 1477  | No | NA | 0 | 2 | Not-determined | Genome-fragment | NA | 0    |
| S12-final-viral-combined_k141_29358  full    | 2509  | No | NA | 0 | 0 | Low-quality    | Genome-fragment | NA | 1.9  |
| S17-k141_163294                              | 2469  | No | NA | 0 | 1 | Not-determined | Genome-fragment | NA | 0    |
| S2-final-viral-combined_k141_19131  H2gene   | 2509  | No | NA | 1 | 0 | Low-quality    | Genome-fragment | NA | 4.12 |
| S17-k141_142523                              | 2837  | No | NA | 0 | 2 | Not-determined | Genome-fragment | NA | 0    |
| S17-k141_163301                              | 1127  | No | NA | 0 | 1 | Not-determined | Genome-fragment | NA | 0    |
| S17-k141_41209                               | 2480  | No | NA | 0 | 2 | Not-determined | Genome-fragment | NA | 0    |
| S8-final-viral-combined_k141_31907  full     | 2509  | No | NA | 0 | 2 | Low-quality    | Genome-fragment | NA | 1.49 |
| S17-k141_87627                               | 1405  | No | NA | 0 | 2 | Not-determined | Genome-fragment | NA | 0    |
| S17-k141_245566                              | 1140  | No | NA | 0 | 1 | Not-determined | Genome-fragment | NA | 0    |
| S17-k141_221070                              | 6379  | No | NA | 0 | 4 | Not-determined | Genome-fragment | NA | 0    |
| S17-k141_76036                               | 4070  | No | NA | 0 | 2 | Not-determined | Genome-fragment | NA | 0    |
| S17-k141_108441                              | 7830  | No | NA | 0 | 1 | Not-determined | Genome-fragment | NA | 0    |
| S17-k141_187387                              | 1071  | No | NA | 0 | 0 | Not-determined | Genome-fragment | NA | 0    |
| S17-k141_30209                               | 3463  | No | NA | 0 | 6 | Not-determined | Genome-fragment | NA | 0    |
| S1-final-viral-combined_k141_217493  full    | 2510  | No | NA | 0 | 0 | Low-quality    | Genome-fragment | NA | 3.83 |
| S17-k141_142612                              | 1092  | No | NA | 0 | 1 | Not-determined | Genome-fragment | NA | 0    |
| S17-k141_50998                               | 3039  | No | NA | 0 | 1 | Not-determined | Genome-fragment | NA | 0    |
| S17-final-viral-combined_k141_103402  full   | 2510  | No | NA | 1 | 0 | Low-quality    | Genome-fragment | NA | 7.07 |
| S17-k141_198491                              | 3881  | No | NA | 0 | 3 | Not-determined | Genome-fragment | NA | 0    |
| S17-k141_51005                               | 1154  | No | NA | 0 | 0 | Not-determined | Genome-fragment | NA | 0    |
| S12-final-viral-combined_k141_343600  H2gene | 2510  | No | NA | 1 | 0 | Low-quality    | Genome-fragment | NA | 5.48 |
| S17-k141_87690                               | 4621  | No | NA | 0 | 1 | Not-determined | Genome-fragment | NA | 0    |
| S17-k141_51035                               | 1110  | No | NA | 0 | 1 | Not-determined | Genome-fragment | NA | 0    |
| S17-k141_209729                              | 1022  | No | NA | 0 | 0 | Not-determined | Genome-fragment | NA | 0    |
| S17-k141_18483                               | 1211  | No | NA | 0 | 1 | Not-determined | Genome-fragment | NA | 0    |
| S17-k141_108529                              | 1208  | No | NA | 0 | 1 | Not-determined | Genome-fragment | NA | 0    |
| S17-k141_41279                               | 1071  | No | NA | 0 | 2 | Not-determined | Genome-fragment | NA | 0    |
| S17-k141_142661                              | 1182  | No | NA | 0 | 1 | Not-determined | Genome-fragment | NA | 0    |
| S17-k141_251893                              | 1412  | No | NA | 0 | 0 | Not-determined | Genome-fragment | NA | 0    |
| S17-k141_18513                               | 1122  | No | NA | 0 | 1 | Not-determined | Genome-fragment | NA | 0    |
| S17-k141_209808                              | 4183  | No | NA | 0 | 3 | Not-determined | Genome-fragment | NA | 0    |
| S17-k141_130648                              | 1445  | No | NA | 0 | 1 | Not-determined | Genome-fragment | NA | 0    |
| S17-k141_30317                               | 1417  | No | NA | 0 | 0 | Not-determined | Genome-fragment | NA | 0    |
| S2-final-viral-combined_k141_326  full       | 2510  | No | NA | 0 | 0 | Low-quality    | Genome-fragment | NA | 5.03 |
| S17-k141_18547                               | 2874  | No | NA | 0 | 1 | Not-determined | Genome-fragment | NA | 0    |
| S17-k141_18548                               | 1163  | No | NA | 0 | 1 | Not-determined | Genome-fragment | NA | 0    |
| S17-k141_8126                                | 1020  | No | NA | 0 | 0 | Not-determined | Genome-fragment | NA | 0    |
| S17-k141_108617                              | 14054 | No | NA | 0 | 8 | Not-determined | Genome-fragment | NA | 0    |
| S11-final-viral-combined_k141_295693  full   | 2511  | No | NA | 0 | 0 | Low-quality    | Genome-fragment | NA | 5.77 |
| S17-k141_18559                               | 2474  | No | NA | 0 | 1 | Not-determined | Genome-fragment | NA | 0    |
| S17-k141_76199                               | 2330  | No | NA | 0 | 0 | Not-determined | Genome-fragment | NA | 0    |
| S17-k141_87760                               | 1060  | No | NA | 0 | 2 | Not-determined | Genome-fragment | NA | 0    |
| S17-k141_108645                              | 2163  | No | NA | 0 | 2 | Not-determined | Genome-fragment | NA | 0    |
| S1-final-viral-combined_k141_225815  H2gene  | 2511  | No | NA | 2 | 0 | Low-quality    | Genome-fragment | NA | 4.88 |
| S17-k141_130768                              | 1084  | No | NA | 0 | 1 | Not-determined | Genome-fragment | NA | 0    |
| S5-final-viral-combined_k141_41338  full     | 2511  | No | NA | 0 | 3 | Low-quality    | Genome-fragment | NA | 0.87 |
| S17-k141_163439                              | 1482  | No | NA | 0 | 1 | Not-determined | Genome-fragment | NA | 0    |
| S17-k141_203791                              | 1076  | No | NA | 0 | 1 | Not-determined | Genome-fragment | NA | 0    |
| S17-k141_8245                                | 2830  | No | NA | 0 | 1 | Not-determined | Genome-fragment | NA | 0    |
| S17-k141_153515                              | 1402  | No | NA | 0 | 1 | Not-determined | Genome-fragment | NA | 0    |
| S17-k141_18602                               | 1141  | No | NA | 0 | 1 | Not-determined | Genome-fragment | NA | 0    |
| S17-k141_189742                              | 3810  | No | NA | 0 | 1 | Not-determined | Genome-fragment | NA | 0    |
| S17-k141_41372                               | 1547  | No | NA | 0 | 1 | Not-determined | Genome-fragment | NA | 0    |
| S17-k141_41383                               | 1594  | No | NA | 0 | 1 | Not-determined | Genome-fragment | NA | 0    |
| S17-k141_187007                              | 2681  | No | NA | 0 | 1 | Not-determined | Genome-fragment | NA | 0    |
| S17-k141_263384                              | 1949  | No | NA | 0 | 1 | Not-determined | Genome-fragment | NA | 0    |
| S12-final-viral-combined_k141_153560  full   | 2511  | No | NA | 0 | 0 | Low-quality    | Genome-fragment | NA | 4.19 |
| S17-k141_41392                               | 3454  | No | NA | 0 | 2 | Not-determined | Genome-fragment | NA | 0    |
| S17-k141_153567                              | 1591  | No | NA | 0 | 1 | Not-determined | Genome-fragment | NA | 0    |
| S17-k141_87860                               | 1153  | No | NA | 0 | 0 | Not-determined | Genome-fragment | NA | 0    |
| S17-k141_76226                               | 1036  | No | NA | 0 | 0 | Not-determined | Genome-fragment | NA | 0    |
| S17-k141_221275                              | 1255  | No | NA | 0 | 0 | Not-determined | Genome-fragment | NA | 0    |
| S8-final-viral-combined_k141_124661  full    | 2512  | No | NA | 1 | 0 | Low-quality    | Genome-fragment | NA | 4.08 |
| S17-k141_175870                              | 3710  | No | NA | 0 | 1 | Not-determined | Genome-fragment | NA | 0    |
| S17-k141_64529                               | 1134  | No | NA | 0 | 1 | Not-determined | Genome-fragment | NA | 0    |
| S11-final-viral-combined_k141_175192  full   | 2514  | No | NA | 0 | 1 | Low-quality    | Genome-fragment | NA | 1.48 |
| S17-k141_108806                              | 1137  | No | NA | 0 | 1 | Not-determined | Genome-fragment | NA | 0    |
| S17-k141_20475                               | 1161  | No | NA | 0 | 1 | Not-determined | Genome-fragment | NA | 0    |
| S17-k141_263429                              | 1095  | No | NA | 0 | 1 | Not-determined | Genome-fragment | NA | 0    |
| S17-k141_87918                               | 1343  | No | NA | 0 | 1 | Not-determined | Genome-fragment | NA | 0    |
| S1-final-viral-combined_k141_215267  full    | 2514  | No | NA | 2 | 0 | Low-quality    | Genome-fragment | NA | 3.89 |
| S3-final-viral-combined_k141_40663  full     | 2514  | No | NA | 1 | 0 | Low-quality    | Genome-fragment | NA | 4.17 |
| S17-k141_263483                              | 1713  | No | NA | 0 | 3 | Not-determined | Genome-fragment | NA | 0    |
| S17-k141_142987                              | 2672  | No | NA | 0 | 2 | Not-determined | Genome-fragment | NA | 0    |
| S5-final-viral-combined_k141_101249  full    | 2514  | No | NA | 0 | 1 | Low-quality    | Genome-fragment | NA | 3.91 |
| S17-k141_51363                               | 4383  | No | NA | 0 | 4 | Not-determined | Genome-fragment | NA | 0    |
| S17-k141_175944                              | 1163  | No | NA | 0 | 1 | Not-determined | Genome-fragment | NA | 0    |
| S5_k141_50193                                | 2514  | No | NA | 0 | 2 | Low-quality    | Genome-fragment | NA | 1.62 |
| S17-k141_221407                              | 2371  | No | NA | 0 | 2 | Not-determined | Genome-fragment | NA | 0    |
| S17-k141_175958                              | 2112  | No | NA | 0 | 1 | Not-determined | Genome-fragment | NA | 0    |
| S17-k141_187664                              | 1138  | No | NA | 0 | 1 | Not-determined | Genome-fragment | NA | 0    |
| S17-k141_242191                              | 1182  | No | NA | 0 | 1 | Not-determined | Genome-fragment | NA | 0    |
| S17-k141_108895                              | 1111  | No | NA | 0 | 0 | Not-determined | Genome-fragment | NA | 0    |
| S17-k141_130989                              | 1811  | No | NA | 0 | 1 | Not-determined | Genome-fragment | NA | 0    |
| S17-k141_18771                               | 1089  | No | NA | 0 | 1 | Not-determined | Genome-fragment | NA | 0    |
| S17-k141_121739                              | 1344  | No | NA | 0 | 2 | Not-determined | Genome-fragment | NA | 0    |
| S17-k141_64694                               | 1058  | No | NA | 0 | 0 | Not-determined | Genome-fragment | NA | 0    |
| S17-k141_76467                               | 1058  | No | NA | 0 | 1 | Not-determined | Genome-fragment | NA | 0    |
| S17-k141_163658                              | 3950  | No | NA | 0 | 1 | Not-determined | Genome-fragment | NA | 0    |
| S17-k141_108944                              | 1052  | No | NA | 0 | 1 | Not-determined | Genome-fragment | NA | 0    |
| S17-k141_210004                              | 1047  | No | NA | 0 | 2 | Not-determined | Genome-fragment | NA | 0    |
| S17-k141_198983                              | 4572  | No | NA | 0 | 2 | Not-determined | Genome-fragment | NA | 0    |
| S17-k141_232480                              | 1896  | No | NA | 0 | 2 | Not-determined | Genome-fragment | NA | 0    |
| S17-k141_88032                               | 8393  | No | NA | 0 | 4 | Not-determined | Genome-fragment | NA | 0    |
| S17-k141_76518                               | 1301  | No | NA | 0 | 1 | Not-determined | Genome-fragment | NA | 0    |
| S17-k141_143106                              | 3143  | No | NA | 0 | 2 | Not-determined | Genome-fragment | NA | 0    |
| S12-final-viral-combined_k141_184847  full   | 2514  | No | NA | 3 | 0 | Low-quality    | Genome-fragment | NA | 6.55 |
| S17-k141_96104                               | 2614  | No | NA | 0 | 0 | Not-determined | Genome-fragment | NA | 0    |



|                                               |      |      |    |   |   |                |                 |    |      |
|-----------------------------------------------|------|------|----|---|---|----------------|-----------------|----|------|
| S17-1411_153922                               | 2082 | No   | NA | 0 | 1 | Not-determined | Genome-fragment | NA | 0    |
| S17-1411_212713                               | 1300 | No   | NA | 0 | 0 | Not-determined | Genome-fragment | NA | 0    |
| S17-final-viral-combined_k141_34611[1]full    | 2518 | No   | NA | 1 | 0 | Low-quality    | Genome-fragment | NA | 4.69 |
| S17-1411_30825                                | 3134 | No   | NA | 0 | 2 | Not-determined | Genome-fragment | NA | 0    |
| S17-1411_232753                               | 1007 | No   | NA | 0 | 0 | Not-determined | Genome-fragment | NA | 0    |
| S17-1411_143302                               | 1712 | No   | NA | 0 | 2 | Not-determined | Genome-fragment | NA | 0    |
| S17-1411_41808                                | 2049 | No   | NA | 0 | 2 | Not-determined | Genome-fragment | NA | 0    |
| S17-1411_199202                               | 1329 | No   | NA | 0 | 2 | Not-determined | Genome-fragment | NA | 0    |
| S17-1411_30188                                | 1386 | No   | NA | 0 | 2 | Not-determined | Genome-fragment | NA | 0    |
| S17-1411_143332                               | 4380 | No   | NA | 0 | 3 | Not-determined | Genome-fragment | NA | 0    |
| S2_k141_245151                                | 2518 | No   | NA | 0 | 1 | Low-quality    | Genome-fragment | NA | 2.09 |
| S8-final-viral-combined_k141_215258[1]full    | 2518 | No   | NA | 0 | 1 | Low-quality    | Genome-fragment | NA | 2.68 |
| S17-1411_65055                                | 1190 | No   | NA | 0 | 1 | Not-determined | Genome-fragment | NA | 0    |
| S17-1411_252259                               | 1340 | No   | NA | 0 | 1 | Not-determined | Genome-fragment | NA | 0    |
| S2_k141_83623                                 | 2519 | No   | NA | 0 | 0 | Low-quality    | Genome-fragment | NA | 1.64 |
| S5-final-viral-combined_k141_98609[1]full     | 2519 | No   | NA | 2 | 0 | Low-quality    | Genome-fragment | NA | 6.16 |
| S17-1411_30866                                | 1881 | No   | NA | 0 | 1 | Not-determined | Genome-fragment | NA | 0    |
| S17-1411_143380                               | 3446 | No   | NA | 0 | 1 | Not-determined | Genome-fragment | NA | 0    |
| S17-1411_109161                               | 2222 | No   | NA | 0 | 1 | Not-determined | Genome-fragment | NA | 0    |
| S17-1411_76866                                | 2671 | No   | NA | 0 | 1 | Not-determined | Genome-fragment | NA | 0    |
| S17-1411_88457                                | 1092 | No   | NA | 0 | 0 | Not-determined | Genome-fragment | NA | 0    |
| S17-1411_163956                               | 3278 | No   | NA | 0 | 1 | Not-determined | Genome-fragment | NA | 0    |
| S17-1411_232884                               | 1067 | No   | NA | 0 | 0 | Not-determined | Genome-fragment | NA | 0    |
| S5-final-viral-combined_k141_58176[1]full     | 2519 | No   | NA | 0 | 0 | Low-quality    | Genome-fragment | NA | 6.96 |
| S7-final-viral-combined_k141_26571[1]full     | 2519 | No   | NA | 0 | 2 | Low-quality    | Genome-fragment | NA | 1.94 |
| S17-1411_30922                                | 3065 | No   | NA | 0 | 2 | Not-determined | Genome-fragment | NA | 0    |
| S17-1411_51693                                | 2312 | No   | NA | 0 | 0 | Not-determined | Genome-fragment | NA | 0    |
| S17-1411_164023                               | 1128 | No   | NA | 0 | 1 | Not-determined | Genome-fragment | NA | 0    |
| S17-1411_199317                               | 1747 | No   | NA | 0 | 0 | Not-determined | Genome-fragment | NA | 0    |
| S17-1411_221895                               | 2586 | No   | NA | 0 | 1 | Not-determined | Genome-fragment | NA | 0    |
| S17-1411_41882                                | 5481 | No   | NA | 0 | 1 | Not-determined | Genome-fragment | NA | 0    |
| S17-1411_232923                               | 3492 | No   | NA | 0 | 2 | Not-determined | Genome-fragment | NA | 0    |
| S12-final-viral-combined_k141_365360[1]full   | 2519 | No   | NA | 0 | 2 | Low-quality    | Genome-fragment | NA | 0.76 |
| S17-1411_154125                               | 1336 | No   | NA | 0 | 2 | Not-determined | Genome-fragment | NA | 0    |
| S17-1411_252359                               | 1728 | No   | NA | 0 | 3 | Not-determined | Genome-fragment | NA | 0    |
| S17-1411_191100                               | 1062 | No   | NA | 0 | 1 | Not-determined | Genome-fragment | NA | 0    |
| S17-1411_122055                               | 1057 | No   | NA | 0 | 1 | Not-determined | Genome-fragment | NA | 0    |
| S17-1411_199358                               | 2344 | No   | NA | 0 | 0 | Not-determined | Genome-fragment | NA | 0    |
| S17-1411_19112                                | 1184 | No   | NA | 0 | 1 | Not-determined | Genome-fragment | NA | 0    |
| S8_k141_196542                                | 2519 | No   | NA | 0 | 0 | Low-quality    | Genome-fragment | NA | 4.76 |
| S17-1411_76911                                | 2566 | No   | NA | 0 | 2 | Not-determined | Genome-fragment | NA | 0    |
| S11-final-viral-combined_k141_118899[1]full   | 2520 | No   | NA | 0 | 1 | Low-quality    | Genome-fragment | NA | 5.42 |
| S11-final-viral-combined_k141_120303[1]full   | 2520 | No   | NA | 0 | 0 | Low-quality    | Genome-fragment | NA | 4.38 |
| S17-1411_176416                               | 1100 | No   | NA | 0 | 0 | Not-determined | Genome-fragment | NA | 0    |
| S17-1411_154154                               | 1136 | No   | NA | 0 | 0 | Not-determined | Genome-fragment | NA | 0    |
| S1-final-viral-combined_k141_362096[1]full    | 2520 | No   | NA | 0 | 1 | Low-quality    | Genome-fragment | NA | 6.18 |
| S17-1411_242564                               | 1339 | No   | NA | 0 | 1 | Not-determined | Genome-fragment | NA | 0    |
| S17-1411_143502                               | 1401 | No   | NA | 0 | 2 | Not-determined | Genome-fragment | NA | 0    |
| S17-1411_242571                               | 1314 | No   | NA | 0 | 2 | Not-determined | Genome-fragment | NA | 0    |
| S17-1411_252397                               | 1131 | No   | NA | 0 | 0 | Not-determined | Genome-fragment | NA | 0    |
| S17-1411_41942                                | 1236 | No   | NA | 0 | 1 | Not-determined | Genome-fragment | NA | 0    |
| S17-1411_122081                               | 2313 | No   | NA | 0 | 4 | Not-determined | Genome-fragment | NA | 0    |
| S17-1411_109293                               | 2300 | No   | NA | 0 | 2 | Not-determined | Genome-fragment | NA | 0    |
| S17-1411_41991                                | 1083 | No   | NA | 0 | 1 | Not-determined | Genome-fragment | NA | 0    |
| S17-1411_176483                               | 1536 | No   | NA | 0 | 0 | Not-determined | Genome-fragment | NA | 0    |
| S17-1411_41992                                | 1061 | No   | NA | 0 | 2 | Not-determined | Genome-fragment | NA | 0    |
| S17-1411_8811                                 | 1279 | No   | NA | 0 | 4 | Not-determined | Genome-fragment | NA | 0    |
| S17-1411_188208                               | 1058 | No   | NA | 0 | 0 | Not-determined | Genome-fragment | NA | 0    |
| S1-final-viral-combined_k141_111802[1]full    | 2520 | No   | NA | 0 | 0 | Low-quality    | Genome-fragment | NA | 5.93 |
| S17-1411_154257                               | 1048 | No   | NA | 0 | 1 | Not-determined | Genome-fragment | NA | 0    |
| S17-1411_131476                               | 1256 | No   | NA | 0 | 4 | Not-determined | Genome-fragment | NA | 0    |
| S17-1411_65382                                | 4258 | No   | NA | 0 | 2 | Not-determined | Genome-fragment | NA | 0    |
| S17-1411_31098                                | 1741 | No   | NA | 0 | 0 | Not-determined | Genome-fragment | NA | 0    |
| S1_k141_386913                                | 2520 | No   | NA | 0 | 0 | Low-quality    | Genome-fragment | NA | 2.74 |
| S17-1411_154274                               | 2363 | No   | NA | 0 | 2 | Not-determined | Genome-fragment | NA | 0    |
| S17-1411_176546                               | 1047 | No   | NA | 0 | 0 | Not-determined | Genome-fragment | NA | 0    |
| S17-1411_122147                               | 2265 | No   | NA | 0 | 0 | Not-determined | Genome-fragment | NA | 0    |
| S17-1411_176555                               | 1316 | No   | NA | 0 | 1 | Not-determined | Genome-fragment | NA | 0    |
| S17-1411_176556                               | 1266 | No   | NA | 0 | 0 | Not-determined | Genome-fragment | NA | 0    |
| S17-1411_31120                                | 1555 | No   | NA | 0 | 0 | Not-determined | Genome-fragment | NA | 0    |
| S17-1411_222066                               | 1059 | No   | NA | 0 | 1 | Not-determined | Genome-fragment | NA | 0    |
| S12-final-viral-combined_k141_277068[1]full   | 2520 | No   | NA | 0 | 0 | Low-quality    | Genome-fragment | NA | 4.37 |
| S17-1411_242644                               | 1765 | No   | NA | 0 | 1 | Not-determined | Genome-fragment | NA | 0    |
| S17-1411_263983                               | 2053 | No   | NA | 0 | 3 | Not-determined | Genome-fragment | NA | 0    |
| S17-1411_222094                               | 2094 | No   | NA | 0 | 2 | Not-determined | Genome-fragment | NA | 0    |
| S17-1411_222095                               | 1765 | No   | NA | 0 | 0 | Not-determined | Genome-fragment | NA | 0    |
| S17-1411_31169                                | 1844 | No   | NA | 0 | 1 | Not-determined | Genome-fragment | NA | 0    |
| S17-1411_222102                               | 5179 | No   | NA | 0 | 1 | Not-determined | Genome-fragment | NA | 0    |
| S17-1411_65376                                | 6488 | No   | NA | 0 | 1 | Not-determined | Genome-fragment | NA | 0    |
| S17-1411_109416                               | 1270 | No   | NA | 0 | 0 | Not-determined | Genome-fragment | NA | 0    |
| S17-1411_188319                               | 6473 | No   | NA | 0 | 3 | Not-determined | Genome-fragment | NA | 0    |
| S17-1411_222143                               | 1766 | No   | NA | 0 | 1 | Not-determined | Genome-fragment | NA | 0    |
| S17-1411_77067                                | 1358 | No   | NA | 0 | 2 | Not-determined | Genome-fragment | NA | 0    |
| S17-1411_222161                               | 1911 | No   | NA | 0 | 2 | Not-determined | Genome-fragment | NA | 0    |
| S17-1411_222165                               | 1349 | No   | NA | 0 | 0 | Not-determined | Genome-fragment | NA | 0    |
| S17-1411_143718                               | 1087 | No   | NA | 0 | 1 | Not-determined | Genome-fragment | NA | 0    |
| S17-1411_199549                               | 1492 | No   | NA | 0 | 2 | Not-determined | Genome-fragment | NA | 0    |
| S17-1411_233198                               | 1555 | No   | NA | 0 | 1 | Not-determined | Genome-fragment | NA | 0    |
| S17-1411_86591                                | 1275 | No   | NA | 0 | 1 | Not-determined | Genome-fragment | NA | 0    |
| S17-1411_210759                               | 2198 | No   | NA | 0 | 1 | Not-determined | Genome-fragment | NA | 0    |
| S17-1411_176676                               | 3076 | No   | NA | 0 | 2 | Not-determined | Genome-fragment | NA | 0    |
| S17-1411_65413                                | 1058 | No   | NA | 0 | 0 | Not-determined | Genome-fragment | NA | 0    |
| S17-1411_252605                               | 1225 | No   | NA | 0 | 1 | Not-determined | Genome-fragment | NA | 0    |
| S17-1411_199589                               | 3038 | No   | NA | 0 | 2 | Not-determined | Genome-fragment | NA | 0    |
| S17-1411_19139                                | 2044 | No   | NA | 0 | 0 | Not-determined | Genome-fragment | NA | 0    |
| S17-1411_210790                               | 1501 | No   | NA | 0 | 0 | Not-determined | Genome-fragment | NA | 0    |
| S17-1411_19346                                | 8835 | No   | NA | 0 | 3 | Not-determined | Genome-fragment | NA | 0    |
| S17-1411_31203                                | 1009 | No   | NA | 0 | 1 | Not-determined | Genome-fragment | NA | 0    |
| S2-final-viral-combined_k141_125449[1]full    | 2520 | No   | NA | 0 | 1 | Low-quality    | Genome-fragment | NA | 5.46 |
| S4-final-viral-combined_k141_147536[1]full    | 2520 | No   | NA | 0 | 0 | Low-quality    | Genome-fragment | NA | 4.75 |
| S17-1411_96650                                | 1461 | No   | NA | 0 | 1 | Not-determined | Genome-fragment | NA | 0    |
| S17-1411_65430                                | 1111 | No   | NA | 0 | 2 | Not-determined | Genome-fragment | NA | 0    |
| S17-1411_42245                                | 2727 | No   | NA | 0 | 1 | Not-determined | Genome-fragment | NA | 0    |
| S17-1411_210837                               | 1773 | No   | NA | 0 | 2 | Not-determined | Genome-fragment | NA | 0    |
| S17-1411_65450                                | 1112 | No   | NA | 0 | 0 | Not-determined | Genome-fragment | NA | 0    |
| S8-final-viral-combined_k141_59851[1]H2genome | 2520 | No   | NA | 1 | 0 | Low-quality    | Genome-fragment | NA | 5.86 |
| S17-1411_88801                                | 1074 | No   | NA | 0 | 1 | Not-determined | Genome-fragment | NA | 0    |
| S17-1411_154474                               | 1071 | No   | NA | 0 | 1 | Not-determined | Genome-fragment | NA | 0    |
| S7-final-viral-combined_k141_159909[1]full    | 2521 | No   | NA | 0 | 1 | Low-quality    | Genome-fragment | NA | 5.3  |
| S2_k141_111684                                | 2521 | No   | NA | 2 | 0 | Low-quality    | Genome-fragment | NA | 7.54 |
| S8-final-viral-combined_k141_195778[1]full    | 2521 | No   | NA | 0 | 3 | Low-quality    | Genome-fragment | NA | 0.91 |
| S17-1411_42365                                | 1053 | No   | NA | 0 | 0 | Not-determined | Genome-fragment | NA | 0    |
| S17-1411_199673                               | 1192 | No   | NA | 0 | 1 | Not-determined | Genome-fragment | NA | 0    |
| S17-1411_77215                                | 1319 | No   | NA | 0 | 1 | Not-determined | Genome-fragment | NA | 0    |
| S17-1411_131732                               | 1209 | No   | NA | 0 | 1 | Not-determined | Genome-fragment | NA | 0    |
| S17-1411_42285                                | 2257 | No   | NA | 0 | 0 | Not-determined | Genome-fragment | NA | 0    |
| S17-1411_242772                               | 1332 | No   | NA | 0 | 1 | Not-determined | Genome-fragment | NA | 0    |
| S17-1411_65524                                | 3370 | No   | NA | 0 | 1 | Not-determined | Genome-fragment | NA | 0    |
| S17-1411_39432                                | 1089 | No   | NA | 0 | 0 | Not-determined | Genome-fragment | NA | 0    |
| S2-final-viral-combined_k141_167397[1]full    | 2522 | No   | NA | 0 | 0 | Low-quality    | Genome-fragment | NA | 4.26 |
| S17-1411_137389                               | 1704 | No   | NA | 0 | 2 | Not-determined | Genome-fragment | NA | 0    |
| S17-1411_131790                               | 2612 | No   | NA | 0 | 2 | Not-determined | Genome-fragment | NA | 0    |
| S2-final-viral-combined_k141_245018[1]full    | 2522 | No   | NA | 1 | 0 | Low-quality    | Genome-fragment | NA | 7.14 |
| S17-1411_51909                                | 1231 | No   | NA | 0 | 0 | Not-determined | Genome-fragment | NA | 0    |
| S6-final-viral-combined_k141_67761[1]full     | 2522 | No   | NA | 0 | 0 | Low-quality    | Genome-fragment | NA | 4.44 |
| S17-1411_77298                                | 2488 | No   | NA | 0 | 2 | Not-determined | Genome-fragment | NA | 0    |
| S8-final-viral-combined_k141_2322[1]full      | 2523 | No   | NA | 1 | 0 | Low-quality    | Genome-fragment | NA | 3.2  |
| S17-1411_19524                                | 1717 | No   | NA | 0 | 2 | Not-determined | Genome-fragment | NA | 0    |
| S17-1411_31387                                | 3402 | No   | NA | 0 | 1 | Not-determined | Genome-fragment | NA | 0    |
| S17-1411_42420                                | 1117 | No   | NA | 0 | 0 | Not-determined | Genome-fragment | NA | 0    |
| S17-1411_264238                               | 3217 | No   | NA | 0 | 2 | Not-determined | Genome-fragment | NA | 0    |
| S17-1411_143924                               | 1624 | No   | NA | 0 | 1 | Not-determined | Genome-fragment | NA | 0    |
| S17-1411_9299                                 | 1131 | No   | NA | 0 | 2 | Not-determined | Genome-fragment | NA | 0    |
| S17-1411_9302                                 | 3155 | No   | NA | 0 | 1 | Not-determined | Genome-fragment | NA | 0    |
| S17-1411_242896                               | 5813 | No   | NA | 0 | 2 | Not-determined | Genome-fragment | NA | 0    |
| S17-1411_154647                               | 1144 | No   | NA | 0 | 1 | Not-determined | Genome-fragment | NA | 0    |
| S17-1411_15976                                | 2404 | No   | NA | 0 | 1 | Not-determined | Genome-fragment | NA | 0    |
| S17-final-viral-combined_k141_88082[1]full    | 2523 | No   | NA | 0 | 2 | Low-quality    | Genome-fragment | NA | 3.04 |
| S17-1411_51998                                | 1056 | No   | NA | 0 | 0 | Not-determined | Genome-fragment | NA | 0    |
| S17-1411_131927                               | 1684 | No   | NA | 0 | 0 | Not-determined | Genome-fragment | NA | 0    |
| S17-1411_42458                                | 1369 | No   | NA | 0 | 0 | Not-determined | Genome-fragment | NA | 0    |
| S17-1411_131971                               | 1315 | No   | NA | 0 | 1 | Not-determined | Genome-fragment | NA | 0    |
| S11-final-viral-combined_k141_159342[1]full   | 2524 | No   | NA | 0 | 0 | Low-quality    | Genome-fragment | NA | 6.55 |
| S17-1411_164519                               | 1536 | No</ |    |   |   |                |                 |    |      |



|                                            |       |     |      |   |                |                 |                 |      |       |
|--------------------------------------------|-------|-----|------|---|----------------|-----------------|-----------------|------|-------|
| S4-final-viral-combined_k141_822181[full]  | 2524  | No  | NA   | 0 | 1              | Low-quality     | Genome-fragment | 1.83 | 0     |
| S4-final-viral-combined_k141_1246161[full] | 2524  | No  | NA   | 0 | 0              | Low-quality     | Genome-fragment | 2.48 | 0     |
| S9-final-viral-combined_k141_52941[full]   | 2525  | No  | NA   | 0 | 0              | Low-quality     | Genome-fragment | 4.44 | 0     |
| S11_k141_125472                            | 2525  | No  | NA   | 0 | 1              | Low-quality     | Genome-fragment | 0.67 | 0     |
| S17-k141_253084                            | 1077  | No  | NA   | 0 | 2              | Not-determined  | Genome-fragment | NA   | 0     |
| S17-k141_77714                             | 4544  | No  | NA   | 0 | 2              | Not-determined  | Genome-fragment | NA   | 0     |
| S17-k141_164892                            | 3266  | No  | NA   | 0 | 3              | Not-determined  | Genome-fragment | NA   | 0     |
| S17-k141_109927                            | 1209  | No  | NA   | 0 | 0              | Not-determined  | Genome-fragment | NA   | 0     |
| S17-k141_66085                             | 1257  | No  | NA   | 0 | 0              | Not-determined  | Genome-fragment | NA   | 0     |
| S17-k141_253099                            | 3936  | No  | NA   | 0 | 5              | Not-determined  | Genome-fragment | NA   | 0     |
| S17-k141_9691                              | 1502  | No  | NA   | 0 | 2              | Not-determined  | Genome-fragment | NA   | 0     |
| S17-k141_253144                            | 1053  | No  | NA   | 0 | 1              | Not-determined  | Genome-fragment | NA   | 0     |
| S17-k141_199985                            | 8078  | No  | NA   | 0 | 0              | Not-determined  | Genome-fragment | NA   | 0     |
| S17-k141_42824                             | 1632  | No  | NA   | 0 | 2              | Not-determined  | Genome-fragment | NA   | 0     |
| S17-k141_86111                             | 1172  | No  | NA   | 0 | 1              | Not-determined  | Genome-fragment | NA   | 0     |
| S17-k141_97188                             | 2134  | No  | NA   | 0 | 2              | Not-determined  | Genome-fragment | NA   | 0     |
| S17-k141_177376                            | 3496  | No  | NA   | 0 | 0              | Not-determined  | Genome-fragment | NA   | 0     |
| S17-k141_243171                            | 2552  | No  | NA   | 0 | 5              | Not-determined  | Genome-fragment | NA   | 0     |
| S17-k141_264518                            | 1045  | No  | NA   | 0 | 0              | Not-determined  | Genome-fragment | NA   | 0     |
| S17-k141_264528                            | 1127  | No  | NA   | 0 | 1              | Not-determined  | Genome-fragment | NA   | 0     |
| S17-k141_42875                             | 5463  | No  | NA   | 0 | 0              | Not-determined  | Genome-fragment | NA   | 0     |
| S17-k141_165027                            | 1021  | No  | NA   | 0 | 0              | Not-determined  | Genome-fragment | NA   | 0     |
| S17-k141_243263                            | 3241  | No  | NA   | 0 | 2              | Not-determined  | Genome-fragment | NA   | 0     |
| S17-k141_264571                            | 4439  | No  | NA   | 0 | 0              | Not-determined  | Genome-fragment | NA   | 0     |
| S7-final-viral-combined_k141_182407[full]  | 2525  | No  | NA   | 1 | 0              | Low-quality     | Genome-fragment | 6.6  | 0     |
| S17-k141_52362                             | 1261  | No  | NA   | 0 | 1              | Not-determined  | Genome-fragment | NA   | 0     |
| S12-final-viral-combined_k141_319270[full] | 2525  | No  | NA   | 1 | 0              | Low-quality     | Genome-fragment | 3.01 | 0     |
| S12-final-viral-combined_k141_137111[full] | 2525  | No  | NA   | 0 | 2              | Low-quality     | Genome-fragment | 1.63 | 0     |
| S17-k141_66210                             | 6183  | No  | NA   | 0 | 2              | Not-determined  | Genome-fragment | NA   | 0     |
| S17-k141_177504                            | 3562  | No  | NA   | 0 | 1              | Not-determined  | Genome-fragment | NA   | 0     |
| S17-k141_132421                            | 1009  | No  | NA   | 0 | 0              | Not-determined  | Genome-fragment | NA   | 0     |
| S17-k141_177505                            | 1942  | No  | NA   | 0 | 2              | Not-determined  | Genome-fragment | NA   | 0     |
| S17-final-viral-combined_k141_193287[full] | 2526  | No  | NA   | 0 | 2              | Low-quality     | Genome-fragment | 1.41 | 0     |
| S17-final-viral-combined_k141_148821[full] | 2526  | No  | NA   | 0 | 2              | Low-quality     | Genome-fragment | 1.35 | 0     |
| S17-k141_264634                            | 3182  | No  | NA   | 0 | 2              | Not-determined  | Genome-fragment | NA   | 0     |
| S17-k141_19395                             | 1042  | No  | NA   | 0 | 0              | Not-determined  | Genome-fragment | NA   | 0     |
| S17-k141_264674                            | 1418  | No  | NA   | 0 | 0              | Not-determined  | Genome-fragment | NA   | 0     |
| S17-k141_253279                            | 1149  | No  | NA   | 0 | 1              | Not-determined  | Genome-fragment | NA   | 0     |
| S17-k141_43015                             | 1124  | No  | NA   | 0 | 2              | Not-determined  | Genome-fragment | NA   | 0     |
| S17-final-viral-combined_k141_15132[full]  | 2526  | No  | NA   | 0 | 1              | Low-quality     | Genome-fragment | 1.41 | 0     |
| S17-k141_97400                             | 1454  | No  | NA   | 0 | 1              | Not-determined  | Genome-fragment | NA   | 0     |
| S17-k141_132511                            | 5044  | No  | NA   | 0 | 1              | Not-determined  | Genome-fragment | NA   | 0     |
| S17-k141_43062                             | 1116  | No  | NA   | 0 | 2              | Not-determined  | Genome-fragment | NA   | 0     |
| S17-k141_177648                            | 1111  | No  | NA   | 0 | 0              | Not-determined  | Genome-fragment | NA   | 0     |
| S17-k141_243339                            | 4751  | No  | NA   | 0 | 1              | Not-determined  | Genome-fragment | NA   | 0     |
| S2-final-viral-combined_k141_406781[12gme] | 2526  | No  | NA   | 0 | 1              | Low-quality     | Genome-fragment | 6.98 | 0     |
| S17-k141_52557                             | 1080  | No  | NA   | 0 | 1              | Not-determined  | Genome-fragment | NA   | 0     |
| S17-k141_43119                             | 1445  | No  | NA   | 0 | 1              | Not-determined  | Genome-fragment | NA   | 0     |
| S17-k141_132570                            | 1000  | No  | NA   | 0 | 1              | Not-determined  | Genome-fragment | NA   | 0     |
| S17-k141_165296                            | 1018  | No  | NA   | 0 | 0              | Not-determined  | Genome-fragment | NA   | 0     |
| S9-final-viral-combined_k141_122213[full]  | 2527  | No  | NA   | 0 | 1              | Low-quality     | Genome-fragment | 2.36 | 0     |
| S17-k141_144251                            | 1084  | No  | NA   | 0 | 6              | Not-determined  | Genome-fragment | NA   | 0     |
| S5-final-viral-combined_k141_15165[full]   | 2527  | No  | NA   | 0 | 3              | Low-quality     | Genome-fragment | 1.24 | 0     |
| S7-final-viral-combined_k141_47385[full]   | 2527  | No  | NA   | 0 | 0              | Low-quality     | Genome-fragment | 4.99 | 0     |
| S17-k141_52625                             | 1347  | No  | NA   | 0 | 0              | Not-determined  | Genome-fragment | NA   | 0     |
| S17-k141_43207                             | 3450  | No  | NA   | 0 | 1              | Not-determined  | Genome-fragment | NA   | 0     |
| S17-k141_43211                             | 1653  | No  | NA   | 0 | 0              | Not-determined  | Genome-fragment | NA   | 0     |
| S17-k141_144274                            | 3703  | No  | NA   | 0 | 3              | Not-determined  | Genome-fragment | NA   | 0     |
| S17-k141_97554                             | 2809  | No  | NA   | 0 | 1              | Not-determined  | Genome-fragment | NA   | 0     |
| S17-k141_52657                             | 2139  | No  | NA   | 0 | 0              | Not-determined  | Genome-fragment | NA   | 0     |
| S17-final-viral-combined_k141_215550[full] | 2527  | No  | NA   | 2 | 0              | Low-quality     | Genome-fragment | 4.35 | 0     |
| S17-k141_253438                            | 4246  | No  | NA   | 6 | Not-determined | Genome-fragment | NA              | 0    | 0     |
| S17-final-viral-combined_k141_104243[full] | 2527  | Yes | 1740 | 1 | 1              | Low-quality     | Genome-fragment | 1.06 | 31.14 |
| S17-k141_253476                            | 4317  | No  | NA   | 0 | 0              | Not-determined  | Genome-fragment | NA   | 0     |
| S17-final-viral-combined_k141_218132[full] | 2527  | Yes | 1843 | 2 | 2              | Low-quality     | Genome-fragment | 1.61 | 27.07 |
| S17-k141_243483                            | 1286  | No  | NA   | 0 | 2              | Not-determined  | Genome-fragment | NA   | 0     |
| S17-k141_264900                            | 3702  | No  | NA   | 0 | 2              | Not-determined  | Genome-fragment | NA   | 0     |
| S17-k141_165510                            | 2398  | No  | NA   | 0 | 2              | Not-determined  | Genome-fragment | NA   | 0     |
| S17-k141_110390                            | 4117  | No  | NA   | 0 | 2              | Not-determined  | Genome-fragment | NA   | 0     |
| S17-k141_264950                            | 1131  | No  | NA   | 0 | 1              | Not-determined  | Genome-fragment | NA   | 0     |
| S17-k141_132796                            | 1016  | No  | NA   | 0 | 0              | Not-determined  | Genome-fragment | NA   | 0     |
| S17-k141_97649                             | 5442  | No  | NA   | 7 | Not-determined | Genome-fragment | NA              | 0    | 0     |
| S2-final-viral-combined_k141_202871[full]  | 2527  | No  | NA   | 0 | 0              | Low-quality     | Genome-fragment | 5.87 | 0     |
| S4_k141_3551                               | 2527  | No  | NA   | 0 | 0              | Low-quality     | Genome-fragment | 6.06 | 0     |
| S17-k141_20125                             | 1248  | No  | NA   | 0 | 1              | Not-determined  | Genome-fragment | NA   | 0     |
| S17-k141_165563                            | 1154  | No  | NA   | 0 | 1              | Not-determined  | Genome-fragment | NA   | 0     |
| S17-k141_97673                             | 1214  | No  | NA   | 0 | 1              | Not-determined  | Genome-fragment | NA   | 0     |
| S17-k141_52827                             | 1239  | No  | NA   | 0 | 0              | Not-determined  | Genome-fragment | NA   | 0     |
| S17-k141_10167                             | 4681  | No  | NA   | 0 | 2              | Not-determined  | Genome-fragment | NA   | 0     |
| S17-k141_43450                             | 1668  | No  | NA   | 0 | 0              | Not-determined  | Genome-fragment | NA   | 0     |
| S17-k141_97756                             | 1508  | No  | NA   | 0 | 1              | Not-determined  | Genome-fragment | NA   | 0     |
| S17-k141_52892                             | 1017  | No  | NA   | 0 | 0              | Not-determined  | Genome-fragment | NA   | 0     |
| S8_k141_252674                             | 2527  | No  | NA   | 3 | 0              | Low-quality     | Genome-fragment | 3.26 | 0     |
| S17-k141_20345                             | 1047  | No  | NA   | 0 | 1              | Not-determined  | Genome-fragment | NA   | 0     |
| S17-k141_155422                            | 2529  | No  | NA   | 0 | 0              | Not-determined  | Genome-fragment | NA   | 0     |
| S17-k141_165770                            | 1469  | No  | NA   | 0 | 0              | Not-determined  | Genome-fragment | NA   | 0     |
| S17-k141_253734                            | 1076  | No  | NA   | 0 | 1              | Not-determined  | Genome-fragment | NA   | 0     |
| S17-k141_20404                             | 1014  | No  | NA   | 0 | 1              | Not-determined  | Genome-fragment | NA   | 0     |
| S17-k141_243865                            | 1131  | No  | NA   | 0 | 0              | Not-determined  | Genome-fragment | NA   | 0     |
| S17-k141_243869                            | 2274  | No  | NA   | 0 | 1              | Not-determined  | Genome-fragment | NA   | 0     |
| S9-final-viral-combined_k141_53780[full]   | 2528  | No  | NA   | 0 | 1              | Low-quality     | Genome-fragment | 6.63 | 0     |
| S17-k141_97896                             | 2878  | No  | NA   | 0 | 1              | Not-determined  | Genome-fragment | NA   | 0     |
| S17-k141_20462                             | 5304  | No  | NA   | 0 | 6              | Not-determined  | Genome-fragment | NA   | 0     |
| S17-k141_265121                            | 2920  | No  | NA   | 0 | 1              | Not-determined  | Genome-fragment | NA   | 0     |
| S17-k141_253820                            | 6428  | No  | NA   | 0 | 0              | Not-determined  | Genome-fragment | NA   | 0     |
| S17-k141_20503                             | 3032  | No  | NA   | 0 | 1              | Not-determined  | Genome-fragment | NA   | 0     |
| S17-k141_97934                             | 3370  | No  | NA   | 0 | 1              | Not-determined  | Genome-fragment | NA   | 0     |
| S17-k141_243910                            | 1037  | No  | NA   | 0 | 1              | Not-determined  | Genome-fragment | NA   | 0     |
| S17-k141_155547                            | 1149  | No  | NA   | 0 | 0              | Not-determined  | Genome-fragment | NA   | 0     |
| S17-k141_32442                             | 1513  | No  | NA   | 0 | 1              | Not-determined  | Genome-fragment | NA   | 0     |
| S8_k141_94704                              | 2528  | No  | NA   | 1 | 0              | Low-quality     | Genome-fragment | 1.16 | 0     |
| S17-k141_32477                             | 1154  | No  | NA   | 0 | 0              | Not-determined  | Genome-fragment | NA   | 0     |
| S5-final-viral-combined_k141_26717[full]   | 2528  | No  | NA   | 0 | 0              | Low-quality     | Genome-fragment | 1.45 | 0     |
| S17-final-viral-combined_k141_204594[full] | 2528  | No  | NA   | 0 | 0              | Low-quality     | Genome-fragment | 6.45 | 0     |
| S17-k141_133091                            | 1214  | No  | NA   | 0 | 1              | Not-determined  | Genome-fragment | NA   | 0     |
| S17-k141_20601                             | 1018  | No  | NA   | 0 | 0              | Not-determined  | Genome-fragment | NA   | 0     |
| S17-k141_53032                             | 2131  | No  | NA   | 0 | 1              | Not-determined  | Genome-fragment | NA   | 0     |
| S17-k141_265214                            | 1016  | No  | NA   | 0 | 0              | Not-determined  | Genome-fragment | NA   | 0     |
| S2-final-viral-combined_k141_228839[full]  | 2528  | No  | NA   | 2 | 2              | Low-quality     | Genome-fragment | 4.39 | 0     |
| S17-k141_265256                            | 1343  | No  | NA   | 0 | 1              | Not-determined  | Genome-fragment | NA   | 0     |
| S17-k141_10656                             | 3107  | No  | NA   | 0 | 3              | Not-determined  | Genome-fragment | NA   | 0     |
| S17-k141_265275                            | 3053  | No  | NA   | 0 | 2              | Not-determined  | Genome-fragment | NA   | 0     |
| S17-k141_166110                            | 1272  | No  | NA   | 0 | 1              | Not-determined  | Genome-fragment | NA   | 0     |
| S11-final-viral-combined_k141_52564[full]  | 2529  | No  | NA   | 1 | 0              | Low-quality     | Genome-fragment | 6.86 | 0     |
| S17-k141_23462                             | 4306  | No  | NA   | 2 | Not-determined | Genome-fragment | NA              | 0    | 0     |
| S17-k141_53161                             | 1297  | No  | NA   | 0 | 1              | Not-determined  | Genome-fragment | NA   | 0     |
| S17-k141_32677                             | 1551  | No  | NA   | 0 | 1              | Not-determined  | Genome-fragment | NA   | 0     |
| S17-k141_20725                             | 10585 | No  | NA   | 0 | 4              | Not-determined  | Genome-fragment | NA   | 0     |
| S17-k141_131320                            | 2492  | No  | NA   | 0 | 1              | Not-determined  | Genome-fragment | NA   | 0     |
| S17-k141_20767                             | 2336  | No  | NA   | 0 | 1              | Not-determined  | Genome-fragment | NA   | 0     |
| S17-k141_265403                            | 1967  | No  | NA   | 0 | 2              | Not-determined  | Genome-fragment | NA   | 0     |
| S17-k141_165162                            | 1251  | No  | NA   | 0 | 0              | Not-determined  | Genome-fragment | NA   | 0     |
| S17-k141_265423                            | 1172  | No  | NA   | 0 | 2              | Not-determined  | Genome-fragment | NA   | 0     |
| S17-k141_244241                            | 2390  | No  | NA   | 0 | 1              | Not-determined  | Genome-fragment | NA   | 0     |
| S17-k141_29123                             | 2529  | No  | NA   | 0 | 1              | Low-quality     | Genome-fragment | 0.29 | 0     |
| S17-k141_44048                             | 1153  | No  | NA   | 0 | 1              | Not-determined  | Genome-fragment | NA   | 0     |
| S17-k141_53240                             | 2165  | No  | NA   | 0 | 1              | Not-determined  | Genome-fragment | NA   | 0     |
| S17-k141_32754                             | 1022  | No  | NA   | 0 | 0              | Not-determined  | Genome-fragment | NA   | 0     |
| S17-k141_32756                             | 1060  | No  | NA   | 0 | 0              | Not-determined  | Genome-fragment | NA   | 0     |
| S2-final-viral-combined_k141_87363[full]   | 2529  | No  | NA   | 1 | 0              | Low-quality     | Genome-fragment | 5.89 | 0     |
| S17-k141_131286                            | 3784  | No  | NA   | 0 | 6              | Not-determined  | Genome-fragment | NA   | 0     |
| S17-k141_20923                             | 1074  | No  | NA   | 0 | 1              | Not-determined  | Genome-fragment | NA   | 0     |
| S17-k141_53281                             | 1795  | No  | NA   | 0 | 1              | Not-determined  | Genome-fragment | NA   | 0     |
| S17-k141_53287                             | 1925  | No  | NA   | 0 | 1              | Not-determined  | Genome-fragment | NA   | 0     |
| S17-final-viral-combined_k141_179456[full] | 2530  | No  | NA   | 0 | 2              | Low-quality     | Genome-fragment | 1.57 | 0     |
| S17-k141_98338                             | 2726  | No  | NA   | 0 | 2              | Not-determined  | Genome-fragment | NA   | 0     |
| S17-k141_265459                            | 30938 | No  | NA   | 0 | 23             | Not-determined  | Genome-fragment | NA   | 0     |
| S17-k141_98349                             | 1040  | No  | NA   | 0 | 0              | Not-determined  | Genome-fragment | NA   | 0     |
| S17-k141_10726                             | 3675  | No  | NA   | 0 | 3              | Not-determined  | Genome-fragment | NA   | 0     |
| S4-final-viral-combined_k141_63059[full]   | 2530  | No  | NA   | 1 | 0              | Low-quality     | Genome-fragment | 1.17 | 0     |
| S17-k141_32864                             | 1910  | No  | NA   | 0 | 1              | Not-determined  | Genome-fragment | NA   | 0     |
| S17-k141_131345                            | 4650  | No  | NA   | 0 | 2              | Not-determined  | Genome-fragment | NA   | 0     |
| S8-final-viral-combined_k141_33984[full]   | 2530  | No  | NA   | 0 | 1              | Low-quality     | Genome-fragment | 1.45 | 0     |
| S17-k141_265593                            | 1560  | No  | NA   | 0 | 0              | Not-determined  | Genome-fragment | NA   | 0     |
| S17-k141_44267                             | 1113  | No  | NA   | 0 | 0              | Not-d           |                 |      |       |



|                                             |        |     |    |       |                |                 |                 |     |       |       |
|---------------------------------------------|--------|-----|----|-------|----------------|-----------------|-----------------|-----|-------|-------|
| S17-4141_33254                              | 1552   | No  | NA | 0     | 2              | Not-determined  | Genome-fragment | NA  | 3.05  | 0     |
| S17-4141_68663                              | 2533   | No  | NA | 0     | 2              | Low-quality     | Genome-fragment | NA  | 0.77  | 0     |
| S17-4141_33264                              | 1906   | No  | NA | 0     | 0              | Not-determined  | Genome-fragment | NA  | 0     | 0     |
| S17-4141_125265                             | 2533   | No  | NA | 0     | 2              | Low-quality     | Genome-fragment | NA  | 0.77  | 0     |
| S17-4141_21416                              | 2289   | No  | NA | 0     | 1              | Not-determined  | Genome-fragment | NA  | 0     | 0     |
| S17-4141_53707                              | 1063   | No  | NA | 0     | 1              | Not-determined  | Genome-fragment | NA  | 0     | 0     |
| S17-4141_265966                             | 1157   | No  | NA | 0     | 1              | Not-determined  | Genome-fragment | NA  | 0     | 0     |
| S17-4141_21470                              | 1013   | No  | NA | 0     | 0              | Not-determined  | Genome-fragment | NA  | 0     | 0     |
| S17-4141_21498                              | 1176   | No  | NA | 0     | 1              | Not-determined  | Genome-fragment | NA  | 0     | 0     |
| S17-4141_53802                              | 1412   | No  | NA | 0     | 1              | Not-determined  | Genome-fragment | NA  | 0     | 0     |
| S17-4141_266120                             | 2195   | No  | NA | 0     | 0              | Not-determined  | Genome-fragment | NA  | 0     | 0     |
| S12-final-viral-combined_k141_52777[Full]   | 2533   | No  | NA | 2     | 0              | Low-quality     | Genome-fragment | NA  | 4.25  | 0     |
| S17-4141_21641                              | 5689   | No  | NA | 0     | 4              | Not-determined  | Genome-fragment | NA  | 0     | 0     |
| S17-4141_166588                             | 1468   | No  | NA | 0     | 0              | Not-determined  | Genome-fragment | NA  | 0     | 0     |
| S17-4141_166601                             | 1273   | No  | NA | 0     | 0              | Not-determined  | Genome-fragment | NA  | 0     | 0     |
| S17-4141_266287                             | 6161   | No  | NA | 7     | Not-determined | Genome-fragment | NA              | 7.3 | 0     |       |
| S12-final-viral-combined_k141_289803[Full]  | 2534   | No  | NA | 0     | 3              | Low-quality     | Genome-fragment | NA  | 1.5   | 0     |
| S12-final-viral-combined_k141_255752[Full]  | 2534   | No  | NA | 1     | 0              | Low-quality     | Genome-fragment | NA  | 7.3   | 0     |
| S17-4141_53968                              | 1253   | No  | NA | 0     | 0              | Not-determined  | Genome-fragment | NA  | 0     | 0     |
| S17-4141_254872                             | 6309   | No  | NA | 3     | 0              | High-quality    | High-quality    | NA  | 100   | 0     |
| S17-4141_21813                              | 1002   | No  | NA | 0     | 1              | Not-determined  | Genome-fragment | NA  | 0     | 0     |
| S17-4141_99300                              | 1572   | No  | NA | 0     | 1              | Not-determined  | Genome-fragment | NA  | 0     | 0     |
| S17-4141_53992                              | 1671   | No  | NA | 0     | 0              | Not-determined  | Genome-fragment | NA  | 0     | 0     |
| S17-4141_21837                              | 1121   | No  | NA | 0     | 1              | Not-determined  | Genome-fragment | NA  | 0     | 0     |
| S17-4141_54015                              | 1404   | No  | NA | 0     | 1              | Not-determined  | Genome-fragment | NA  | 0     | 0     |
| S17-4141_266448                             | 1305   | No  | NA | 0     | 1              | Not-determined  | Genome-fragment | NA  | 0     | 0     |
| S17-4141_99377                              | 1485   | No  | NA | 0     | 1              | Not-determined  | Genome-fragment | NA  | 0     | 0     |
| S17-4141_266482                             | 3121   | No  | NA | 0     | 1              | Not-determined  | Genome-fragment | NA  | 0     | 0     |
| S17-4141_266507                             | 5528   | No  | NA | 0     | 1              | Not-determined  | Genome-fragment | NA  | 0     | 0     |
| S12-final-viral-combined_k141_247553[Full]  | 2534   | No  | NA | 1     | 0              | Low-quality     | Genome-fragment | NA  | 4.08  | 0     |
| S17-4141_266511                             | 40034  | No  | NA | 44    | 0              | Complete        | High-quality    | NA  | 100   | 0     |
| S17-4141_255017                             | 1054   | No  | NA | 0     | 1              | Not-determined  | Genome-fragment | NA  | 0     | 0     |
| S17-4141_266523                             | 1204   | No  | NA | 0     | 0              | Not-determined  | Genome-fragment | NA  | 0     | 0     |
| S17-4141_266544                             | 4526   | No  | NA | 0     | 0              | Not-determined  | Genome-fragment | NA  | 0     | 0     |
| S4_k141_246368                              | 2534   | No  | NA | 0     | 0              | Low-quality     | Genome-fragment | NA  | 2.67  | 0     |
| S17-4141_22115                              | 4616   | No  | NA | 0     | 0              | Not-determined  | Genome-fragment | NA  | 0     | 0     |
| S17-4141_255203                             | 2614   | No  | NA | 0     | 1              | Not-determined  | Genome-fragment | NA  | 0     | 0     |
| S17-4141_54414                              | 3199   | No  | NA | 0     | 5              | Not-determined  | Genome-fragment | NA  | 0     | 0     |
| S17-4141_54474                              | 2887   | No  | NA | 0     | 1              | Not-determined  | Genome-fragment | NA  | 0     | 0     |
| S17-4141_99746                              | 1740   | No  | NA | 0     | 1              | Not-determined  | Genome-fragment | NA  | 0     | 0     |
| S1-final-viral-combined_k141_177606[Full]   | 2535   | No  | NA | 1     | 0              | Low-quality     | Genome-fragment | NA  | 1.7   | 0     |
| S17-4141_99756                              | 4285   | No  | NA | 0     | 1              | Not-determined  | Genome-fragment | NA  | 0     | 0     |
| S17-4141_255494                             | 4712   | No  | NA | 0     | 3              | Not-determined  | Genome-fragment | NA  | 0     | 0     |
| S17-4141_99785                              | 3065   | No  | NA | 0     | 6              | Not-determined  | Genome-fragment | NA  | 0     | 0     |
| S17-4141_255545                             | 4203   | No  | NA | 0     | 2              | Not-determined  | Genome-fragment | NA  | 0     | 0     |
| S17-4141_54784                              | 1004   | No  | NA | 0     | 1              | Not-determined  | Genome-fragment | NA  | 0     | 0     |
| S17-4141_54829                              | 1199   | No  | NA | 0     | 1              | Not-determined  | Genome-fragment | NA  | 0     | 0     |
| S17-4141_54845                              | 1199   | No  | NA | 0     | 1              | Not-determined  | Genome-fragment | NA  | 0     | 0     |
| S17-4141_55118                              | 1699   | No  | NA | 0     | 2              | Not-determined  | Genome-fragment | NA  | 0     | 0     |
| S17-4141_55311                              | 1917   | No  | NA | 0     | 1              | Not-determined  | Genome-fragment | NA  | 0     | 0     |
| S17-4141_55515                              | 2254   | No  | NA | 0     | 1              | Not-determined  | Genome-fragment | NA  | 0     | 0     |
| S12-final-viral-combined_k141_221274[Full]  | 21212  | No  | NA | 14    | 1              | High-quality    | High-quality    | NA  | 98.29 | 0     |
| S12-final-viral-combined_k141_342900[Full]  | 2133   | No  | NA | 0     | 0              | Not-determined  | Genome-fragment | NA  | 0     | 0     |
| S12-final-viral-combined_k141_383488[Full]  | 1001   | No  | NA | 0     | 0              | Not-determined  | Genome-fragment | NA  | 0     | 0     |
| S12-final-viral-combined_k141_266071[Full]  | 3847   | No  | NA | 0     | 1              | Not-determined  | Genome-fragment | NA  | 0     | 0     |
| S12-final-viral-combined_k141_401374[Full]  | 6103   | No  | NA | 0     | 0              | Not-determined  | Genome-fragment | NA  | 0     | 0     |
| S12-final-viral-combined_k141_401375[Full]  | 5326   | No  | NA | 0     | 1              | Not-determined  | Genome-fragment | NA  | 0     | 0     |
| S12-final-viral-combined_k141_401379[Full]  | 10959  | No  | NA | 0     | 1              | Medium-quality  | Genome-fragment | NA  | 74.67 | 0     |
| S12-final-viral-combined_k141_401381[Full]  | 5467   | No  | NA | 0     | 0              | High-quality    | High-quality    | NA  | 95.51 | 0     |
| S12-final-viral-combined_k141_200877[Full]  | 1536   | No  | NA | 0     | 0              | Not-determined  | Genome-fragment | NA  | 0     | 0     |
| S12-final-viral-combined_k141_385000[Full]  | 3281   | No  | NA | 0     | 2              | Not-determined  | Genome-fragment | NA  | 0     | 0     |
| S12-final-viral-combined_k141_502501[Full]  | 1545   | No  | NA | 0     | 0              | Not-determined  | Genome-fragment | NA  | 0     | 0     |
| S12-final-viral-combined_k141_21[Full]      | 6799   | No  | NA | 0     | 1              | Not-determined  | Genome-fragment | NA  | 0     | 0     |
| S12-final-viral-combined_k141_385009[Full]  | 2545   | No  | NA | 0     | 1              | Not-determined  | Genome-fragment | NA  | 0     | 0     |
| S12-final-viral-combined_k141_83728[Full]   | 6003   | No  | NA | 0     | 3              | Not-determined  | Genome-fragment | NA  | 0     | 0     |
| S6-final-viral-combined_k141_128463[Full]   | 2535   | No  | NA | 0     | 0              | Low-quality     | Genome-fragment | NA  | 5.9   | 0     |
| S1-final-viral-combined_k141_244662[Full]   | 2536   | No  | NA | 2     | 0              | Low-quality     | Genome-fragment | NA  | 5.7   | 0     |
| S1-final-viral-combined_k141_108769[Full]   | 2537   | No  | NA | 0     | 2              | Low-quality     | Genome-fragment | NA  | 1.11  | 0     |
| S17-final-viral-combined_k141_081001[Full]  | 2537   | No  | NA | 0     | 0              | Low-quality     | Genome-fragment | NA  | 1.75  | 0     |
| S4-final-viral-combined_k141_43602[Full]    | 2537   | No  | NA | 0     | 2              | Low-quality     | Genome-fragment | NA  | 1.89  | 0     |
| S12-final-viral-combined_k141_200900[Full]  | 1857   | No  | NA | 0     | 2              | Not-determined  | Genome-fragment | NA  | 0.11  | 49.9  |
| S6-final-viral-combined_k141_134381[Full]   | 2537   | Yes | NA | 1271  | 2              | Low-quality     | Genome-fragment | NA  | 48.9  | 0     |
| S12-final-viral-combined_k141_368301[Full]  | 1950   | No  | NA | 1     | 3              | Not-determined  | Genome-fragment | NA  | 0     | 0     |
| S8-final-viral-combined_k141_219128[Full]   | 2537   | No  | NA | 1     | 0              | Low-quality     | Genome-fragment | NA  | 4.43  | 0     |
| S12-final-viral-combined_k141_134381[Full]  | 5113   | No  | NA | 0     | 1              | Not-determined  | Genome-fragment | NA  | 0     | 0     |
| S12-final-viral-combined_k141_351543[Full]  | 1023   | No  | NA | 0     | 0              | Not-determined  | Genome-fragment | NA  | 0     | 0     |
| S9-final-viral-combined_k141_9257[Full]     | 2538   | No  | NA | 0     | 0              | Low-quality     | Genome-fragment | NA  | 12.6  | 0     |
| S1-final-viral-combined_k141_334336[Full]   | 2538   | No  | NA | 0     | 2              | Low-quality     | Genome-fragment | NA  | 1.22  | 0     |
| S12-final-viral-combined_k141_368317[Full]  | 3477   | No  | NA | 0     | 0              | Not-determined  | Genome-fragment | NA  | 0     | 0     |
| S1-final-viral-combined_k141_95460[Full]    | 2538   | No  | NA | 2     | 0              | Low-quality     | Genome-fragment | NA  | 5.84  | 0     |
| S12-final-viral-combined_k141_117218[Full]  | 1842   | No  | NA | 0     | 0              | Not-determined  | Genome-fragment | NA  | 0     | 0     |
| S12-final-viral-combined_k141_670211[Full]  | 2574   | No  | NA | 0     | 0              | Not-determined  | Genome-fragment | NA  | 0     | 0     |
| S1-final-viral-combined_k141_48411[Full]    | 2538   | No  | NA | 0     | 2              | Low-quality     | Genome-fragment | NA  | 1.49  | 0     |
| S12-final-viral-combined_k141_251397[Full]  | 1327   | No  | NA | 0     | 1              | Not-determined  | Genome-fragment | NA  | 0     | 0     |
| S12-final-viral-combined_k141_251397[Full]  | 1493   | No  | NA | 0     | 0              | Not-determined  | Genome-fragment | NA  | 0     | 0     |
| S12-final-viral-combined_k141_200985[Full]  | 1155   | No  | NA | 0     | 0              | Not-determined  | Genome-fragment | NA  | 0     | 0     |
| S5-final-viral-combined_k141_180533[Full]   | 2538   | No  | NA | 0     | 1              | Low-quality     | Genome-fragment | NA  | 6.63  | 0     |
| S2_k141_23457                               | 2538   | No  | NA | 0     | 0              | Low-quality     | Genome-fragment | NA  | 0.43  | 0     |
| S12-final-viral-combined_k141_334806[Full]  | 82744  | Yes | NA | 39697 | 37             | High-quality    | High-quality    | NA  | 51.82 | 51.0  |
| S4-final-viral-combined_k141_110136[Full]   | 2538   | No  | NA | 3     | 0              | Low-quality     | Genome-fragment | NA  | 3.91  | 0     |
| S12-final-viral-combined_k141_30353[Full]   | 2539   | No  | NA | 1     | 0              | Low-quality     | Genome-fragment | NA  | 6.28  | 0     |
| S17-final-viral-combined_k141_530721[Full]  | 2539   | No  | NA | 0     | 2              | Low-quality     | Genome-fragment | NA  | 0.56  | 0     |
| S12-final-viral-combined_k141_117276[Full]  | 4816   | No  | NA | 0     | 1              | Not-determined  | Genome-fragment | NA  | 0     | 0     |
| S12-final-viral-combined_k141_284745[Full]  | 3231   | No  | NA | 0     | 1              | Not-determined  | Genome-fragment | NA  | 0     | 0     |
| S12-final-viral-combined_k141_1757691[Full] | 2539   | No  | NA | 0     | 2              | Low-quality     | Genome-fragment | NA  | 6.59  | 0     |
| S12-final-viral-combined_k141_83766[Full]   | 1582   | No  | NA | 0     | 2              | Not-determined  | Genome-fragment | NA  | 0     | 0     |
| S12-final-viral-combined_k141_83769[Full]   | 1049   | No  | NA | 0     | 1              | Not-determined  | Genome-fragment | NA  | 0     | 0     |
| S12-final-viral-combined_k141_303426[Full]  | 4655   | No  | NA | 0     | 3              | Not-determined  | Genome-fragment | NA  | 0     | 0     |
| S12-final-viral-combined_k141_117280[Full]  | 4014   | No  | NA | 0     | 0              | Not-determined  | Genome-fragment | NA  | 0     | 0     |
| S12-final-viral-combined_k141_334838[Full]  | 1760   | No  | NA | 0     | 0              | Not-determined  | Genome-fragment | NA  | 0     | 0     |
| S12-final-viral-combined_k141_303435[Full]  | 6336   | No  | NA | 0     | 1              | Not-determined  | Genome-fragment | NA  | 0     | 0     |
| S4_k141_101992                              | 2539   | No  | NA | 0     | 1              | Low-quality     | Genome-fragment | NA  | 1.48  | 0     |
| S9-final-viral-combined_k141_271911[Full]   | 2540   | No  | NA | 0     | 2              | Low-quality     | Genome-fragment | NA  | 4.47  | 0     |
| S12-final-viral-combined_k141_217795[Full]  | 1662   | No  | NA | 0     | 2              | Not-determined  | Genome-fragment | NA  | 0     | 0     |
| S12-final-viral-combined_k141_284381[Full]  | 13631  | No  | NA | 9     | 1              | Not-determined  | Genome-fragment | NA  | 0     | 0     |
| S12-final-viral-combined_k141_83809[Full]   | 1016   | No  | NA | 0     | 1              | Not-determined  | Genome-fragment | NA  | 0     | 0     |
| S11-final-viral-combined_k141_186120[Full]  | 2540   | No  | NA | 0     | 0              | Low-quality     | Genome-fragment | NA  | 4.12  | 0     |
| S12-final-viral-combined_k141_150754[Full]  | 1556   | No  | NA | 0     | 0              | Not-determined  | Genome-fragment | NA  | 0     | 0     |
| S12-final-viral-combined_k141_83815[Full]   | 3550   | No  | NA | 0     | 1              | Not-determined  | Genome-fragment | NA  | 0     | 0     |
| S12-final-viral-combined_k141_301472[Full]  | 2619   | No  | NA | 0     | 1              | Not-determined  | Genome-fragment | NA  | 5.28  | 0     |
| S5-final-viral-combined_k141_4799[Full]     | 2540   | No  | NA | 1     | 0              | Low-quality     | Genome-fragment | NA  | 0     | 0     |
| S12-final-viral-combined_k141_150761[Full]  | 2549   | No  | NA | 0     | 0              | Not-determined  | Genome-fragment | NA  | 0     | 0     |
| S12-final-viral-combined_k141_170762[Full]  | 2540   | No  | NA | 2     | 0              | Low-quality     | Genome-fragment | NA  | 7.16  | 0     |
| S17-final-viral-combined_k141_201111[Full]  | 2541   | No  | NA | 0     | 0              | Low-quality     | Genome-fragment | NA  | 5.88  | 0     |
| S12-final-viral-combined_k141_201501[Full]  | 4186   | No  | NA | 0     | 1              | Not-determined  | Genome-fragment | NA  | 0     | 0     |
| S12-final-viral-combined_k141_385217[Full]  | 1656   | No  | NA | 0     | 1              | Not-determined  | Genome-fragment | NA  | 0     | 0     |
| S12-final-viral-combined_k141_377681[Full]  | 2541   | No  | NA | 0     | 0              | Low-quality     | Genome-fragment | NA  | 5.69  | 0     |
| S12-final-viral-combined_k141_318216[Full]  | 1376   | No  | NA | 0     | 2              | Not-determined  | Genome-fragment | NA  | 0     | 0     |
| S12-final-viral-combined_k141_1171551[Full] | 2254   | No  | NA | 0     | 0              | Not-determined  | Genome-fragment | NA  | 0     | 0     |
| S12-final-viral-combined_k141_368434[Full]  | 2376   | No  | NA | 0     | 1              | Not-determined  | Genome-fragment | NA  | 0     | 0     |
| S12-final-viral-combined_k141_284841[Full]  | 4886   | No  | NA | 0     | 3              | Not-determined  | Genome-fragment | NA  | 0     | 0     |
| S12-final-viral-combined_k141_368435[Full]  | 3560   | No  | NA | 0     | 4              | Not-determined  | Genome-fragment | NA  | 0     | 0     |
| S12-final-viral-combined_k141_83855[Full]   | 2410   | No  | NA | 0     | 2              | Not-determined  | Genome-fragment | NA  | 0     | 0     |
| S12-final-viral-combined_k141_16917[Full]   | 1339   | No  | NA | 0     | 0              | Not-determined  | Genome-fragment | NA  | 0     | 0     |
| S12-final-viral-combined_k141_184338[Full]  | 50077  | Yes | NA | 38325 | 20             | Complete        | High-quality    | NA  | 100   | 23.47 |
| S12_k141_304421                             | 2541   | No  | NA | 1     | 0              | Low-quality     | Genome-fragment | NA  | 7.72  | 0     |
| S12-final-viral-combined_k141_284847[Full]  | 1674   | No  | NA | 0     | 0              | Not-determined  | Genome-fragment | NA  | 0     | 0     |
| S12-final-viral-combined_k141_184348[Full]  | 1199   | No  | NA | 0     | 1              | Not-determined  | Genome-fragment | NA  | 0     | 0     |
| S12-final-viral-combined_k141_205576[Full]  | 2541   | No  | NA | 1     | 0              | Low-quality     | Genome-fragment | NA  | 1.45  | 0     |
| S4_k141_18730                               | 2541</ |     |    |       |                |                 |                 |     |       |       |



|                                      |          |       |    |    |   |    |                |                 |       |   |
|--------------------------------------|----------|-------|----|----|---|----|----------------|-----------------|-------|---|
| S5-final-viral-combined_k141_453277  | [full]   | 2545  | No | NA | 0 | 0  | Low-quality    | Genome-fragment | 2.71  | 0 |
| S12-final-viral-combined_k141_318440 | [full]   | 1262  | No | NA | 0 | 0  | Not-determined | Genome-fragment | NA    | 0 |
| S5_k141_193829                       |          | 2545  | No | NA | 0 | 1  | Low-quality    | Genome-fragment | 1.66  | 0 |
| S12-final-viral-combined_k141_67326  | [full]   | 1279  | No | NA | 0 | 2  | Not-determined | Genome-fragment | NA    | 0 |
| S12-final-viral-combined_k141_100749 | [full]   | 2314  | No | NA | 0 | 2  | Not-determined | Genome-fragment | NA    | 0 |
| S12-final-viral-combined_k141_334986 | [full]   | 1924  | No | NA | 0 | 1  | Not-determined | Genome-fragment | NA    | 0 |
| S12-final-viral-combined_k141_50612  | [full]   | 9714  | No | NA | 0 | 7  | Not-determined | Genome-fragment | NA    | 0 |
| S12-final-viral-combined_k141_201138 | [full]   | 8995  | No | NA | 0 | 7  | Not-determined | Genome-fragment | NA    | 0 |
| S12-final-viral-combined_k141_201139 | [full]   | 2247  | No | NA | 0 | 2  | Not-determined | Genome-fragment | NA    | 0 |
| S7-final-viral-combined_k141_24074   | [full]   | 2545  | No | NA | 2 | 0  | Low-quality    | Genome-fragment | 6.24  | 0 |
| S12-final-viral-combined_k141_268082 | [full]   | 3563  | No | NA | 0 | 1  | Not-determined | Genome-fragment | NA    | 0 |
| S12-final-viral-combined_k141_36566  | [full]   | 23237 | No | NA | 2 | 2  | Medium-quality | Genome-fragment | 54.25 | 0 |
| S12-final-viral-combined_k141_33984  | [full]   | 1781  | No | NA | 0 | 0  | Not-determined | Genome-fragment | NA    | 0 |
| S12-final-viral-combined_k141_318478 | [full]   | 1627  | No | NA | 0 | 1  | Not-determined | Genome-fragment | NA    | 0 |
| S12-final-viral-combined_k141_33986  | [full]   | 1288  | No | NA | 0 | 0  | Not-determined | Genome-fragment | NA    | 0 |
| S11-final-viral-combined_k141_183928 | [full]   | 2546  | No | NA | 0 | 0  | Low-quality    | Genome-fragment | 2.29  | 0 |
| S12-final-viral-combined_k141_50653  | [full]   | 3846  | No | NA | 0 | 2  | Not-determined | Genome-fragment | NA    | 0 |
| S12-final-viral-combined_k141_167831 | [full]   | 1759  | No | NA | 0 | 0  | Not-determined | Genome-fragment | NA    | 0 |
| S9-final-viral-combined_k141_133047  | [R2gene] | 2546  | No | NA | 0 | 0  | Low-quality    | Genome-fragment | 1.17  | 0 |
| S7-final-viral-combined_k141_174134  | [full]   | 2546  | No | NA | 0 | 0  | Low-quality    | Genome-fragment | 5.11  | 0 |
| S12-final-viral-combined_k141_318505 | [full]   | 1167  | No | NA | 0 | 0  | Not-determined | Genome-fragment | NA    | 0 |
| S12-final-viral-combined_k141_365881 | [full]   | 1824  | No | NA | 0 | 0  | Not-determined | Genome-fragment | NA    | 0 |
| S12-final-viral-combined_k141_100825 | [full]   | 2610  | No | NA | 0 | 0  | Not-determined | Genome-fragment | NA    | 0 |
| S12-final-viral-combined_k141_217996 | [full]   | 2712  | No | NA | 0 | 3  | Not-determined | Genome-fragment | NA    | 0 |
| S12-final-viral-combined_k141_268128 | [full]   | 8883  | No | NA | 0 | 4  | Not-determined | Genome-fragment | NA    | 0 |
| S12-final-viral-combined_k141_234755 | [full]   | 2885  | No | NA | 0 | 2  | Not-determined | Genome-fragment | NA    | 0 |
| S12-final-viral-combined_k141_155781 | [full]   | 2546  | No | NA | 0 | 0  | Low-quality    | Genome-fragment | 1.43  | 0 |
| S12-final-viral-combined_k141_50693  | [full]   | 1851  | No | NA | 0 | 0  | Not-determined | Genome-fragment | NA    | 0 |
| S12-final-viral-combined_k141_395568 | [full]   | 2546  | No | NA | 1 | 1  | Low-quality    | Genome-fragment | 5.68  | 0 |
| S12-final-viral-combined_k141_234767 | [full]   | 4224  | No | NA | 0 | 2  | Not-determined | Genome-fragment | NA    | 0 |
| S8-final-viral-combined_k141_217377  | [full]   | 2546  | No | NA | 0 | 2  | Low-quality    | Genome-fragment | 6.17  | 0 |
| S12-final-viral-combined_k141_335202 | [full]   | 1174  | No | NA | 0 | 2  | Not-determined | Genome-fragment | NA    | 0 |
| S12-final-viral-combined_k141_50745  | [full]   | 4445  | No | NA | 0 | 2  | Not-determined | Genome-fragment | NA    | 0 |
| S12-final-viral-combined_k141_385472 | [full]   | 1758  | No | NA | 0 | 2  | Not-determined | Genome-fragment | NA    | 0 |
| S5-final-viral-combined_k141_169403  | [full]   | 2547  | No | NA | 1 | 0  | Low-quality    | Genome-fragment | 2.86  | 0 |
| S12-final-viral-combined_k141_201220 | [full]   | 2063  | No | NA | 0 | 1  | Not-determined | Genome-fragment | NA    | 0 |
| S12-final-viral-combined_k141_67394  | [full]   | 4357  | No | NA | 0 | 1  | Not-determined | Genome-fragment | NA    | 0 |
| S5-final-viral-combined_k141_46896   | [full]   | 2547  | No | NA | 1 | 0  | Low-quality    | Genome-fragment | 4.77  | 0 |
| S12-final-viral-combined_k141_234796 | [full]   | 6003  | No | NA | 0 | 1  | Not-determined | Genome-fragment | NA    | 0 |
| S7-final-viral-combined_k141_194825  | [full]   | 2547  | No | NA | 0 | 1  | Low-quality    | Genome-fragment | 6.15  | 0 |
| S12-final-viral-combined_k141_335082 | [full]   | 2206  | No | NA | 0 | 0  | Not-determined | Genome-fragment | NA    | 0 |
| S12-final-viral-combined_k141_36888  | [full]   | 2547  | No | NA | 2 | 2  | Low-quality    | Genome-fragment | 3.15  | 0 |
| S12-final-viral-combined_k141_84196  | [full]   | 2433  | No | NA | 0 | 1  | Not-determined | Genome-fragment | NA    | 0 |
| S12-final-viral-combined_k141_556    | [full]   | 2886  | No | NA | 0 | 0  | Not-determined | Genome-fragment | NA    | 0 |
| S2-final-viral-combined_k141_107467  | [full]   | 2547  | No | NA | 2 | 0  | Low-quality    | Genome-fragment | 5.71  | 0 |
| S12-final-viral-combined_k141_335088 | [full]   | 1665  | No | NA | 0 | 0  | Not-determined | Genome-fragment | NA    | 0 |
| S2-final-viral-combined_k141_255682  | [full]   | 2547  | No | NA | 1 | 0  | Low-quality    | Genome-fragment | 5.69  | 0 |
| S12-final-viral-combined_k141_201275 | [full]   | 2934  | No | NA | 0 | 0  | Not-determined | Genome-fragment | NA    | 0 |
| S4_k141_2273                         |          | 2547  | No | NA | 0 | 0  | Low-quality    | Genome-fragment | 15.22 | 0 |
| S12-final-viral-combined_k141_50792  | [full]   | 2211  | No | NA | 0 | 0  | Not-determined | Genome-fragment | NA    | 0 |
| S12-final-viral-combined_k141_218111 | [full]   | 2611  | No | NA | 0 | 2  | Not-determined | Genome-fragment | NA    | 0 |
| S12-final-viral-combined_k141_368700 | [full]   | 1892  | No | NA | 0 | 1  | Not-determined | Genome-fragment | NA    | 0 |
| S12-final-viral-combined_k141_301863 | [full]   | 1259  | No | NA | 0 | 2  | Not-determined | Genome-fragment | NA    | 0 |
| S12-final-viral-combined_k141_285228 | [full]   | 9234  | No | NA | 0 | 1  | Not-determined | Genome-fragment | NA    | 0 |
| S12-final-viral-combined_k141_335096 | [full]   | 1520  | No | NA | 0 | 0  | Not-determined | Genome-fragment | NA    | 0 |
| S12-final-viral-combined_k141_301868 | [full]   | 2844  | No | NA | 0 | 1  | Not-determined | Genome-fragment | NA    | 0 |
| S12-final-viral-combined_k141_617    | [full]   | 2611  | No | NA | 0 | 0  | Not-determined | Genome-fragment | NA    | 0 |
| S12-final-viral-combined_k141_285237 | [full]   | 1297  | No | NA | 0 | 3  | Not-determined | Genome-fragment | NA    | 0 |
| S12-final-viral-combined_k141_268200 | [full]   | 4330  | No | NA | 0 | 0  | Not-determined | Genome-fragment | NA    | 0 |
| S12-final-viral-combined_k141_184608 | [full]   | 6415  | No | NA | 0 | 7  | Not-determined | Genome-fragment | NA    | 0 |
| S12-final-viral-combined_k141_100983 | [full]   | 1606  | No | NA | 0 | 2  | Not-determined | Genome-fragment | NA    | 0 |
| S12-final-viral-combined_k141_150997 | [full]   | 2016  | No | NA | 0 | 2  | Not-determined | Genome-fragment | NA    | 0 |
| S12-final-viral-combined_k141_351767 | [full]   | 15789 | No | NA | 0 | 4  | Not-determined | Genome-fragment | NA    | 0 |
| S12-final-viral-combined_k141_234862 | [full]   | 1224  | No | NA | 0 | 0  | Not-determined | Genome-fragment | NA    | 0 |
| S12-final-viral-combined_k141_341701 | [full]   | 2172  | No | NA | 0 | 0  | Not-determined | Genome-fragment | NA    | 0 |
| S12-final-viral-combined_k141_335103 | [full]   | 7382  | No | NA | 0 | 0  | Not-determined | Genome-fragment | NA    | 0 |
| S5_k141_123823                       |          | 2548  | No | NA | 5 | 0  | Low-quality    | Genome-fragment | 6.18  | 0 |
| S7-final-viral-combined_k141_78567   | [full]   | 2548  | No | NA | 4 | 0  | Low-quality    | Genome-fragment | 5.61  | 0 |
| S12-final-viral-combined_k141_76297  | [full]   | 2548  | No | NA | 2 | 2  | Low-quality    | Genome-fragment | 1.54  | 0 |
| S12_k141_359663                      |          | 2548  | No | NA | 0 | 0  | Low-quality    | Genome-fragment | 1.66  | 0 |
| S12-final-viral-combined_k141_67493  | [full]   | 2745  | No | NA | 0 | 0  | Not-determined | Genome-fragment | NA    | 0 |
| S12-final-viral-combined_k141_234895 | [full]   | 3272  | No | NA | 0 | 2  | Not-determined | Genome-fragment | NA    | 0 |
| S12_k141_346211                      |          | 2548  | No | NA | 0 | 0  | Low-quality    | Genome-fragment | 4.6   | 0 |
| S12-final-viral-combined_k141_134589 | [full]   | 1338  | No | NA | 0 | 2  | Not-determined | Genome-fragment | NA    | 0 |
| S12-final-viral-combined_k141_34217  | [full]   | 1696  | No | NA | 0 | 0  | Not-determined | Genome-fragment | NA    | 0 |
| S9-final-viral-combined_k141_101405  | [full]   | 2549  | No | NA | 2 | 0  | Low-quality    | Genome-fragment | 4.34  | 0 |
| S4-final-viral-combined_k141_101094  | [full]   | 2549  | No | NA | 0 | 0  | Low-quality    | Genome-fragment | 3.16  | 0 |
| S8-final-viral-combined_k141_96821   | [full]   | 2549  | No | NA | 2 | 0  | Low-quality    | Genome-fragment | 1.93  | 0 |
| S12-final-viral-combined_k141_201387 | [full]   | 1849  | No | NA | 0 | 2  | Not-determined | Genome-fragment | NA    | 0 |
| S12-final-viral-combined_k141_34226  | [full]   | 10414 | No | NA | 0 | 7  | Not-determined | Genome-fragment | NA    | 0 |
| S12-final-viral-combined_k141_368824 | [full]   | 1522  | No | NA | 0 | 1  | Not-determined | Genome-fragment | NA    | 0 |
| S12-final-viral-combined_k141_342361 | [full]   | 1359  | No | NA | 0 | 0  | Not-determined | Genome-fragment | NA    | 0 |
| S12-final-viral-combined_k141_117510 | [full]   | 3342  | No | NA | 0 | 3  | Not-determined | Genome-fragment | NA    | 0 |
| S8-final-viral-combined_k141_120990  | [full]   | 2549  | No | NA | 0 | 0  | Low-quality    | Genome-fragment | 4.9   | 0 |
| S11-final-viral-combined_k141_67870  | [full]   | 2550  | No | NA | 0 | 1  | Low-quality    | Genome-fragment | 2.06  | 0 |
| S12-final-viral-combined_k141_151054 | [full]   | 2822  | No | NA | 0 | 4  | Not-determined | Genome-fragment | NA    | 0 |
| S12-final-viral-combined_k141_151057 | [full]   | 2886  | No | NA | 0 | 2  | Not-determined | Genome-fragment | NA    | 0 |
| S12-final-viral-combined_k141_235171 | [full]   | 1918  | No | NA | 0 | 6  | Not-determined | Genome-fragment | NA    | 0 |
| S2-final-viral-combined_k141_134451  | [full]   | 2550  | No | NA | 0 | 0  | Low-quality    | Genome-fragment | 3.08  | 0 |
| S12-final-viral-combined_k141_101036 | [full]   | 1079  | No | NA | 0 | 1  | Not-determined | Genome-fragment | NA    | 0 |
| S12-final-viral-combined_k141_50905  | [full]   | 2940  | No | NA | 0 | 4  | Not-determined | Genome-fragment | NA    | 0 |
| S12-final-viral-combined_k141_117450 | [full]   | 254   | No | NA | 0 | 1  | Not-determined | Genome-fragment | NA    | 0 |
| S12-final-viral-combined_k141_134629 | [full]   | 2909  | No | NA | 0 | 1  | Not-determined | Genome-fragment | NA    | 0 |
| S12-final-viral-combined_k141_351847 | [full]   | 12931 | No | NA | 1 | 1  | Medium-quality | Genome-fragment | 61.98 | 0 |
| S9-final-viral-combined_k141_83118   | [full]   | 2551  | No | NA | 0 | 0  | Low-quality    | Genome-fragment | 1.54  | 0 |
| S11-final-viral-combined_k141_142885 | [full]   | 2551  | No | NA | 2 | 0  | Low-quality    | Genome-fragment | 7.62  | 0 |
| S12-final-viral-combined_k141_84358  | [full]   | 2422  | No | NA | 0 | 2  | Not-determined | Genome-fragment | NA    | 0 |
| S12-final-viral-combined_k141_780    | [full]   | 19689 | No | NA | 0 | 12 | Not-determined | Genome-fragment | NA    | 0 |
| S12-final-viral-combined_k141_285466 | [full]   | 1468  | No | NA | 0 | 0  | Not-determined | Genome-fragment | NA    | 0 |
| S12-final-viral-combined_k141_184749 | [full]   | 1111  | No | NA | 0 | 0  | Not-determined | Genome-fragment | NA    | 0 |
| S12-final-viral-combined_k141_268378 | [full]   | 3149  | No | NA | 0 | 0  | Not-determined | Genome-fragment | NA    | 0 |
| S11-final-viral-combined_k141_272097 | [full]   | 2551  | No | NA | 0 | 0  | Low-quality    | Genome-fragment | 0.55  | 0 |
| S17-final-viral-combined_k141_17629  | [full]   | 2551  | No | NA | 0 | 1  | Low-quality    | Genome-fragment | 3.04  | 0 |
| S12-final-viral-combined_k141_358610 | [full]   | 4011  | No | NA | 0 | 2  | Not-determined | Genome-fragment | NA    | 0 |
| S12-final-viral-combined_k141_335208 | [full]   | 2210  | No | NA | 0 | 0  | Not-determined | Genome-fragment | NA    | 0 |
| S12-final-viral-combined_k141_360168 | [full]   | 2551  | No | NA | 0 | 1  | Low-quality    | Genome-fragment | 1.9   | 0 |
| S8_k141_139466                       |          | 2551  | No | NA | 0 | 1  | Low-quality    | Genome-fragment | 0.95  | 0 |
| S5-final-viral-combined_k141_71865   | [full]   | 2552  | No | NA | 1 | 0  | Low-quality    | Genome-fragment | 4.71  | 0 |
| S12-final-viral-combined_k141_17565  | [full]   | 1184  | No | NA | 0 | 1  | Not-determined | Genome-fragment | NA    | 0 |
| S12-final-viral-combined_k141_803    | [full]   | 1194  | No | NA | 0 | 1  | Not-determined | Genome-fragment | NA    | 0 |
| S12-final-viral-combined_k141_201556 | [full]   | 2317  | No | NA | 0 | 2  | Not-determined | Genome-fragment | NA    | 0 |
| S12-final-viral-combined_k141_318748 | [full]   | 4015  | No | NA | 0 | 3  | Not-determined | Genome-fragment | NA    | 0 |
| S12-final-viral-combined_k141_301980 | [full]   | 1847  | No | NA | 0 | 0  | Not-determined | Genome-fragment | NA    | 0 |
| S12-final-viral-combined_k141_351936 | [full]   | 7284  | No | NA | 0 | 3  | Not-determined | Genome-fragment | NA    | 0 |
| S12-final-viral-combined_k141_285504 | [full]   | 1602  | No | NA | 0 | 1  | Not-determined | Genome-fragment | NA    | 0 |
| S5-final-viral-combined_k141_18627   | [full]   | 2552  | No | NA | 0 | 0  | Low-quality    | Genome-fragment | 4.92  | 0 |
| S12-final-viral-combined_k141_287615 | [full]   | 2552  | No | NA | 3 | 0  | Low-quality    | Genome-fragment | 5.32  | 0 |
| S4-final-viral-combined_k141_45269   | [full]   | 2552  | No | NA | 0 | 0  | Low-quality    | Genome-fragment | 3.32  | 0 |
| S12-final-viral-combined_k141_351842 | [full]   | 1379  | No | NA | 0 | 2  | Not-determined | Genome-fragment | NA    | 0 |
| S12-final-viral-combined_k141_84399  | [full]   | 8535  | No | NA | 0 | 6  | Not-determined | Genome-fragment | NA    | 0 |
| S12-final-viral-combined_k141_318758 | [full]   | 6965  | No | NA | 0 | 5  | Not-determined | Genome-fragment | NA    | 0 |
| S12-final-viral-combined_k141_184806 | [full]   | 3469  | No | NA | 0 | 2  | Not-determined | Genome-fragment | NA    | 0 |
| S12-final-viral-combined_k141_151169 | [full]   | 1075  | No | NA | 0 | 0  | Not-determined | Genome-fragment | NA    | 0 |
| S12-final-viral-combined_k141_201582 | [full]   | 2612  | No | NA | 0 | 0  | Not-determined | Genome-fragment | NA    | 0 |
| S12-final-viral-combined_k141_235047 | [full]   | 3309  | No | NA | 0 | 3  | Not-determined | Genome-fragment | NA    | 0 |
| S8-final-viral-combined_k141_11433   | [full]   | 2552  | No | NA | 0 | 0  | Low-quality    | Genome-fragment | 4.22  | 0 |
| S12-final-viral-combined_k141_109329 | [R2gene] | 2552  | No | NA | 1 | 0  | Low-quality    | Genome-fragment | 7.4   | 0 |
| S12-final-viral-combined_k141_268436 | [full]   | 1385  | No | NA | 0 | 1  | Not-determined | Genome-fragment | NA    | 0 |
| S9-final-viral-combined_k141_126139  | [full]   | 2553  | No | NA | 1 | 0  | Low-quality    | Genome-fragment | 3.76  | 0 |



|                                      |        |       |    |    |   |   |                |                 |    |      |   |
|--------------------------------------|--------|-------|----|----|---|---|----------------|-----------------|----|------|---|
| S12-final-viral-combined_k141_385894 | [full] | 2694  | No | NA | 0 | 0 | Not-determined | Genome-fragment | NA | 0    | 0 |
| S12-final-viral-combined_k141_302234 | [full] | 1971  | No | NA | 0 | 0 | Not-determined | Genome-fragment | NA | 0    | 0 |
| S12_k141_304034                      |        | 2558  | No | NA | 0 | 1 | Low-quality    | Genome-fragment | NA | 3.25 | 0 |
| S12-final-viral-combined_k141_84514  | [full] | 2558  | No | NA | 1 | 0 | Low-quality    | Genome-fragment | NA | 2.67 | 0 |
| S9-final-viral-combined_k141_87843   | [full] | 2559  | No | NA | 0 | 0 | Low-quality    | Genome-fragment | NA | 3.32 | 0 |
| S12-final-viral-combined_k141_23526  | [full] | 1085  | No | NA | 0 | 0 | Not-determined | Genome-fragment | NA | 0    | 0 |
| S9-final-viral-combined_k141_121235  | [full] | 2559  | No | NA | 1 | 0 | Low-quality    | Genome-fragment | NA | 4.19 | 0 |
| S12-final-viral-combined_k141_26866  | [full] | 3515  | No | NA | 0 | 2 | Not-determined | Genome-fragment | NA | 8    | 0 |
| S12-final-viral-combined_k141_117431 | [full] | 14210 | No | NA | 0 | 0 | Not-determined | Genome-fragment | NA | 0    | 0 |
| S11-final-viral-combined_k141_36139  | [full] | 2559  | No | NA | 0 | 3 | Low-quality    | Genome-fragment | NA | 3.7  | 0 |
| S12-final-viral-combined_k141_285753 | [full] | 16786 | No | NA | 0 | 4 | Not-determined | Genome-fragment | NA | 0    | 0 |
| S12-final-viral-combined_k141_34639  | [full] | 1995  | No | NA | 0 | 2 | Not-determined | Genome-fragment | NA | 0    | 0 |
| S12-final-viral-combined_k141_101305 | [full] | 1556  | No | NA | 0 | 1 | Not-determined | Genome-fragment | NA | 0    | 0 |
| S12-final-viral-combined_k141_285765 | [full] | 2652  | No | NA | 0 | 2 | Not-determined | Genome-fragment | NA | 0    | 0 |
| S12-final-viral-combined_k141_335429 | [full] | 5783  | No | NA | 0 | 5 | Not-determined | Genome-fragment | NA | 0    | 0 |
| S12-final-viral-combined_k141_36544  | [full] | 1915  | No | NA | 0 | 0 | Not-determined | Genome-fragment | NA | 0    | 0 |
| S12-final-viral-combined_k141_285778 | [full] | 1909  | No | NA | 0 | 1 | Not-determined | Genome-fragment | NA | 0    | 0 |
| S1-final-viral-combined_k141_87365   | [full] | 2559  | No | NA | 0 | 0 | Low-quality    | Genome-fragment | NA | 4.03 | 0 |
| S5-final-viral-combined_k141_92389   | [full] | 2559  | No | NA | 0 | 3 | Low-quality    | Genome-fragment | NA | 1.55 | 0 |
| S12-final-viral-combined_k141_385958 | [full] | 1733  | No | NA | 0 | 2 | Not-determined | Genome-fragment | NA | 0    | 0 |
| S12-final-viral-combined_k141_17903  | [full] | 1264  | No | NA | 0 | 0 | Not-determined | Genome-fragment | NA | 0    | 0 |
| S7-final-viral-combined_k141_36097   | [full] | 2559  | No | NA | 0 | 3 | Low-quality    | Genome-fragment | NA | 7.64 | 0 |
| S12-final-viral-combined_k141_185086 | [full] | 1504  | No | NA | 0 | 2 | Not-determined | Genome-fragment | NA | 0    | 0 |
| S7-final-viral-combined_k141_48937   | [full] | 2559  | No | NA | 1 | 0 | Low-quality    | Genome-fragment | NA | 1.64 | 0 |
| S12-final-viral-combined_k141_385991 | [full] | 2392  | No | NA | 0 | 1 | Not-determined | Genome-fragment | NA | 0    | 0 |
| S12-final-viral-combined_k141_385995 | [full] | 2376  | No | NA | 0 | 0 | Not-determined | Genome-fragment | NA | 0    | 0 |
| S2_k141_37816                        |        | 2559  | No | NA | 0 | 1 | Low-quality    | Genome-fragment | NA | 1.14 | 0 |
| S12-final-viral-combined_k141_268774 | [full] | 2338  | No | NA | 0 | 2 | Not-determined | Genome-fragment | NA | 0    | 0 |
| S12-final-viral-combined_k141_268779 | [full] | 1712  | No | NA | 0 | 0 | Not-determined | Genome-fragment | NA | 0    | 0 |
| S17-k141_260059                      |        | 2561  | No | NA | 0 | 0 | Low-quality    | Genome-fragment | NA | 6.48 | 0 |
| S12-final-viral-combined_k141_218512 | [full] | 2719  | No | NA | 0 | 2 | Not-determined | Genome-fragment | NA | 0    | 0 |
| S12-final-viral-combined_k141_268782 | [full] | 8983  | No | NA | 0 | 3 | Not-determined | Genome-fragment | NA | 0    | 0 |
| S12-final-viral-combined_k141_352183 | [full] | 1732  | No | NA | 0 | 0 | Not-determined | Genome-fragment | NA | 0    | 0 |
| S12-final-viral-combined_k141_134875 | [full] | 8667  | No | NA | 0 | 3 | Not-determined | Genome-fragment | NA | 0    | 0 |
| S9-final-viral-combined_k141_43519   | [full] | 2562  | No | NA | 3 | 0 | Low-quality    | Genome-fragment | NA | 6.5  | 0 |
| S12-final-viral-combined_k141_34742  | [full] | 1135  | No | NA | 0 | 2 | Not-determined | Genome-fragment | NA | 0    | 0 |
| S12-final-viral-combined_k141_179551 | [full] | 10510 | No | NA | 0 | 8 | Not-determined | Genome-fragment | NA | 0    | 0 |
| S12-final-viral-combined_k141_134897 | [full] | 4303  | No | NA | 0 | 2 | Not-determined | Genome-fragment | NA | 0    | 0 |
| S12-final-viral-combined_k141_302330 | [full] | 1677  | No | NA | 0 | 0 | Not-determined | Genome-fragment | NA | 0    | 0 |
| S9_k141_65446                        |        | 2562  | No | NA | 0 | 0 | Low-quality    | Genome-fragment | NA | 4.4  | 0 |
| S7-final-viral-combined_k141_124108  | [full] | 2562  | No | NA | 0 | 1 | Low-quality    | Genome-fragment | NA | 2.1  | 0 |
| S12-final-viral-combined_k141_240863 | [full] | 2562  | No | NA | 0 | 0 | Low-quality    | Genome-fragment | NA | 4.65 | 0 |
| S12-final-viral-combined_k141_117824 | [full] | 1729  | No | NA | 0 | 3 | Not-determined | Genome-fragment | NA | 0    | 0 |
| S1-final-viral-combined_k141_156785  | [full] | 2563  | No | NA | 0 | 3 | Low-quality    | Genome-fragment | NA | 3.02 | 0 |
| S3-final-viral-combined_k141_27283   | [full] | 2563  | No | NA | 0 | 0 | Low-quality    | Genome-fragment | NA | 4.76 | 0 |
| S12-final-viral-combined_k141_117841 | [full] | 1312  | No | NA | 0 | 2 | Not-determined | Genome-fragment | NA | 0    | 0 |
| S5-final-viral-combined_k141_118217  | [full] | 2563  | No | NA | 0 | 2 | Low-quality    | Genome-fragment | NA | 1.45 | 0 |
| S5_k141_188809                       |        | 2563  | No | NA | 1 | 0 | Low-quality    | Genome-fragment | NA | 1.58 | 0 |
| S12-final-viral-combined_k141_134926 | [full] | 1864  | No | NA | 0 | 0 | Not-determined | Genome-fragment | NA | 0    | 0 |
| S12-final-viral-combined_k141_319096 | [full] | 1065  | No | NA | 0 | 0 | Not-determined | Genome-fragment | NA | 0    | 0 |
| S12-final-viral-combined_k141_252070 | [full] | 1350  | No | NA | 0 | 1 | Not-determined | Genome-fragment | NA | 0    | 0 |
| S12-final-viral-combined_k141_56950  | [full] | 2563  | No | NA | 0 | 0 | Low-quality    | Genome-fragment | NA | 2.49 | 0 |
| S12-final-viral-combined_k141_34773  | [full] | 2655  | No | NA | 0 | 1 | Not-determined | Genome-fragment | NA | 0    | 0 |
| S12_k141_68113                       |        | 2563  | No | NA | 0 | 1 | Low-quality    | Genome-fragment | NA | 1.26 | 0 |
| S11_k141_21648                       |        | 2564  | No | NA | 1 | 0 | Low-quality    | Genome-fragment | NA | 1.93 | 0 |
| S12-final-viral-combined_k141_117866 | [full] | 1376  | No | NA | 0 | 0 | Not-determined | Genome-fragment | NA | 0    | 0 |
| S12-final-viral-combined_k141_252089 | [full] | 4933  | No | NA | 0 | 2 | Not-determined | Genome-fragment | NA | 0    | 0 |
| S12-final-viral-combined_k141_386064 | [full] | 8169  | No | NA | 0 | 5 | Not-determined | Genome-fragment | NA | 0    | 0 |
| S12-final-viral-combined_k141_10142  | [full] | 3117  | No | NA | 0 | 0 | Not-determined | Genome-fragment | NA | 0    | 0 |
| S12-final-viral-combined_k141_285887 | [full] | 3070  | No | NA | 0 | 2 | Not-determined | Genome-fragment | NA | 0    | 0 |
| S1-final-viral-combined_k141_246788  | [full] | 2564  | No | NA | 0 | 0 | Low-quality    | Genome-fragment | NA | 6.16 | 0 |
| S12-final-viral-combined_k141_204360 | [full] | 2564  | No | NA | 0 | 0 | Low-quality    | Genome-fragment | NA | 1.93 | 0 |
| S12-final-viral-combined_k141_386095 | [full] | 3474  | No | NA | 0 | 4 | Not-determined | Genome-fragment | NA | 0    | 0 |
| S12-final-viral-combined_k141_252154 | [full] | 1622  | No | NA | 0 | 0 | Not-determined | Genome-fragment | NA | 0    | 0 |
| S12-final-viral-combined_k141_185206 | [full] | 12841 | No | NA | 0 | 0 | Not-determined | Genome-fragment | NA | 0    | 0 |
| S12_k141_401223                      |        | 2564  | No | NA | 1 | 0 | Low-quality    | Genome-fragment | NA | 1.86 | 0 |
| S12-final-viral-combined_k141_352313 | [full] | 5990  | No | NA | 0 | 2 | Not-determined | Genome-fragment | NA | 0    | 0 |
| S12-final-viral-combined_k141_352319 | [full] | 2074  | No | NA | 0 | 0 | Not-determined | Genome-fragment | NA | 0    | 0 |
| S1-final-viral-combined_k141_230930  | [full] | 2565  | No | NA | 0 | 0 | Low-quality    | Genome-fragment | NA | 4.43 | 0 |
| S17-final-viral-combined_k141_102133 | [full] | 2565  | No | NA | 0 | 1 | Low-quality    | Genome-fragment | NA | 4.42 | 0 |
| S12-final-viral-combined_k141_1154   | [full] | 1403  | No | NA | 0 | 2 | Not-determined | Genome-fragment | NA | 2.85 | 0 |
| S2-final-viral-combined_k141_15697   | [full] | 2565  | No | NA | 0 | 0 | Low-quality    | Genome-fragment | NA | 0    | 0 |
| S12-final-viral-combined_k141_302401 | [full] | 2658  | No | NA | 0 | 2 | Not-determined | Genome-fragment | NA | 0    | 0 |
| S2_k141_80876                        |        | 2565  | No | NA | 0 | 0 | Low-quality    | Genome-fragment | NA | 2.49 | 0 |
| S12-final-viral-combined_k141_185266 | [full] | 2241  | No | NA | 0 | 1 | Not-determined | Genome-fragment | NA | 0    | 0 |
| S12-final-viral-combined_k141_352366 | [full] | 2184  | No | NA | 0 | 0 | Not-determined | Genome-fragment | NA | 0    | 0 |
| S12-final-viral-combined_k141_369324 | [full] | 3286  | No | NA | 0 | 1 | Not-determined | Genome-fragment | NA | 0    | 0 |
| S12-final-viral-combined_k141_117947 | [full] | 1527  | No | NA | 0 | 0 | Not-determined | Genome-fragment | NA | 0    | 0 |
| S12-final-viral-combined_k141_252173 | [full] | 1958  | No | NA | 0 | 2 | Not-determined | Genome-fragment | NA | 0    | 0 |
| S12-final-viral-combined_k141_101476 | [full] | 2735  | No | NA | 0 | 1 | Not-determined | Genome-fragment | NA | 0    | 0 |
| S4-final-viral-combined_k141_103877  | [full] | 2565  | No | NA | 0 | 2 | Low-quality    | Genome-fragment | NA | 1.33 | 0 |
| S17-final-viral-combined_k141_62351  | [full] | 2566  | No | NA | 0 | 0 | Low-quality    | Genome-fragment | NA | 3.39 | 0 |
| S1-final-viral-combined_k141_278715  | [full] | 2567  | No | NA | 0 | 3 | Low-quality    | Genome-fragment | NA | 3.42 | 0 |
| S12-final-viral-combined_k141_157291 | [full] | 2567  | No | NA | 0 | 0 | Low-quality    | Genome-fragment | NA | 5.9  | 0 |
| S9-final-viral-combined_k141_100205  | [full] | 2568  | No | NA | 0 | 0 | Low-quality    | Genome-fragment | NA | 5.89 | 0 |
| S7-final-viral-combined_k141_189259  | [full] | 2568  | No | NA | 0 | 0 | Low-quality    | Genome-fragment | NA | 1.85 | 0 |
| S12-final-viral-combined_k141_84828  | [full] | 1105  | No | NA | 0 | 0 | Not-determined | Genome-fragment | NA | 0    | 0 |
| S12-final-viral-combined_k141_36942  | [full] | 1146  | No | NA | 0 | 0 | Not-determined | Genome-fragment | NA | 0    | 0 |
| S2-final-viral-combined_k141_53251   | [full] | 2568  | No | NA | 0 | 0 | Low-quality    | Genome-fragment | NA | 5.73 | 0 |
| S11-final-viral-combined_k141_108095 | [full] | 2569  | No | NA | 1 | 0 | Low-quality    | Genome-fragment | NA | 1.55 | 0 |
| S12-final-viral-combined_k141_118009 | [full] | 2466  | No | NA | 0 | 0 | Not-determined | Genome-fragment | NA | 0    | 0 |
| S12-final-viral-combined_k141_18001  | [full] | 1059  | No | NA | 0 | 0 | Not-determined | Genome-fragment | NA | 0    | 0 |
| S12-final-viral-combined_k141_118020 | [full] | 3111  | No | NA | 0 | 4 | Not-determined | Genome-fragment | NA | 0    | 0 |
| S11_k141_258682                      |        | 2569  | No | NA | 0 | 0 | Low-quality    | Genome-fragment | NA | 2.39 | 0 |
| S12-final-viral-combined_k141_154690 | [full] | 1931  | No | NA | 0 | 2 | Not-determined | Genome-fragment | NA | 0    | 0 |
| S12-final-viral-combined_k141_369441 | [full] | 1631  | No | NA | 0 | 0 | Not-determined | Genome-fragment | NA | 0    | 0 |
| S1-final-viral-combined_k141_357705  | [full] | 2569  | No | NA | 2 | 0 | Low-quality    | Genome-fragment | NA | 5.36 | 0 |
| S12-final-viral-combined_k141_252259 | [full] | 2737  | No | NA | 0 | 2 | Not-determined | Genome-fragment | NA | 3.39 | 0 |
| S5-final-viral-combined_k141_114085  | [full] | 2569  | No | NA | 0 | 1 | Low-quality    | Genome-fragment | NA | 1.83 | 0 |
| S17-final-viral-combined_k141_264487 | [full] | 2569  | No | NA | 0 | 0 | Low-quality    | Genome-fragment | NA | 5.46 | 0 |
| S12_k141_101817                      |        | 2569  | No | NA | 0 | 1 | Low-quality    | Genome-fragment | NA | 0    | 0 |
| S12-final-viral-combined_k141_302509 | [full] | 2844  | No | NA | 0 | 2 | Not-determined | Genome-fragment | NA | 0    | 0 |
| S12-final-viral-combined_k141_386249 | [full] | 5263  | No | NA | 0 | 2 | Not-determined | Genome-fragment | NA | 0    | 0 |
| S6-final-viral-combined_k141_97286   | [full] | 2569  | No | NA | 2 | 0 | Low-quality    | Genome-fragment | NA | 6.91 | 0 |
| S11-final-viral-combined_k141_98394  | [full] | 2570  | No | NA | 0 | 1 | Low-quality    | Genome-fragment | NA | 5.67 | 0 |
| S9_k141_71088                        |        | 2570  | No | NA | 0 | 0 | Low-quality    | Genome-fragment | NA | 5.73 | 0 |
| S12-final-viral-combined_k141_151708 | [full] | 2441  | No | NA | 0 | 1 | Not-determined | Genome-fragment | NA | 0    | 0 |
| S12-final-viral-combined_k141_369514 | [full] | 2063  | No | NA | 0 | 2 | Not-determined | Genome-fragment | NA | 0    | 0 |
| S12-final-viral-combined_k141_335661 | [full] | 1103  | No | NA | 0 | 3 | Not-determined | Genome-fragment | NA | 0    | 0 |
| S12-final-viral-combined_k141_84948  | [full] | 1699  | No | NA | 0 | 0 | Not-determined | Genome-fragment | NA | 0    | 0 |
| S8-final-viral-combined_k141_55150   | [full] | 2570  | No | NA | 1 | 0 | Low-quality    | Genome-fragment | NA | 6.76 | 0 |
| S5-final-viral-combined_k141_32313   | [full] | 2571  | No | NA | 0 | 0 | Low-quality    | Genome-fragment | NA | 0    | 0 |
| S12-final-viral-combined_k141_386284 | [full] | 9454  | No | NA | 0 | 4 | Not-determined | Genome-fragment | NA | 0    | 0 |
| S12-final-viral-combined_k141_118091 | [full] | 2569  | No | NA | 0 | 0 | Not-determined | Genome-fragment | NA | 0    | 0 |
| S12-final-viral-combined_k141_285961 | [full] | 1480  | No | NA | 0 | 0 | Not-determined | Genome-fragment | NA | 0    | 0 |
| S12-final-viral-combined_k141_352503 | [full] | 6962  | No | NA | 0 | 2 | Not-determined | Genome-fragment | NA | 0    | 0 |
| S12-final-viral-combined_k141_118097 | [full] | 1401  | No | NA | 0 | 2 | Not-determined | Genome-fragment | NA | 0    | 0 |
| S17-final-viral-combined_k141_242127 | [full] | 2571  | No | NA | 0 | 1 | Low-quality    | Genome-fragment | NA | 1.81 | 0 |
| S12-final-viral-combined_k141_97726  | [full] | 2571  | No | NA | 0 | 0 | Low-quality    | Genome-fragment | NA | 2.16 | 0 |
| S12-final-viral-combined_k141_98773  | [full] | 2571  | No | NA | 0 | 3 | Low-quality    | Genome-fragment | NA | 1.51 | 0 |
| S6-final-viral-combined_k141_2158    | [full] | 2571  | No | NA | 0 | 1 | Low-quality    | Genome-fragment | NA | 1.96 | 0 |
| S1-final-viral-combined_k141_1266    | [full] | 2572  | No | NA | 0 | 0 | Low-quality    | Genome-fragment | NA |      |   |



|                                      |         |       |     |    |    |    |    |                |                 |    |       |       |
|--------------------------------------|---------|-------|-----|----|----|----|----|----------------|-----------------|----|-------|-------|
| S12-final-viral-combined_k141_352653 | [full]  | 1307  | No  | NA | 0  | 0  | 0  | Not-determined | Genome-fragment | NA |       | 0     |
| S9-final-viral-combined_k141_28846   | [full]  | 2578  | No  | NA | 0  | 0  | 0  | Low-quality    | Genome-fragment | NA | 7.25  | 0     |
| S11-final-viral-combined_k141_202175 | [full]  | 2578  | No  | NA | 0  | 0  | 0  | Low-quality    | Genome-fragment | NA | 5.67  | 0     |
| S12-final-viral-combined_k141_85178  | [full]  | 2582  | No  | NA | 0  | 0  | 0  | Not-determined | Genome-fragment | NA |       | 0     |
| S11-final-viral-combined_k141_203930 | [full]  | 2578  | No  | NA | 0  | 0  | 2  | Low-quality    | Genome-fragment | NA | 3.54  | 0     |
| S12-final-viral-combined_k141_16511  | [full]  | 1217  | No  | NA | 0  | 0  | 1  | Not-determined | Genome-fragment | NA | 0     | 0     |
| S12-final-viral-combined_k141_335956 | [full]  | 1067  | No  | NA | 0  | 0  | 2  | Not-determined | Genome-fragment | NA |       | 0     |
| S14-final-viral-combined_k141_115184 | [full]  | 2578  | No  | NA | 0  | 0  | 2  | Low-quality    | Genome-fragment | NA | 3.35  | 0     |
| S12-final-viral-combined_k141_1667   | [full]  | 2853  | No  | NA | 0  | 0  | 0  | Not-determined | Genome-fragment | NA | 0     | 0     |
| S5-final-viral-combined_k141_77389   | [full]  | 2578  | No  | NA | 0  | 2  | 2  | Low-quality    | Genome-fragment | NA | 4.39  | 0     |
| S12-final-viral-combined_k141_101820 | [full]  | 7835  | No  | NA | 0  | 0  | 3  | Not-determined | Genome-fragment | NA |       | 0     |
| S12-final-viral-combined_k141_152792 | [full]  | 2578  | No  | NA | 0  | 0  | 0  | Low-quality    | Genome-fragment | NA | 4.64  | 0     |
| S12-final-viral-combined_k141_191503 | [full]  | 2578  | No  | NA | 2  | 0  | 0  | Low-quality    | Genome-fragment | NA | 4.37  | 0     |
| S11-final-viral-combined_k141_287278 | [full]  | 2579  | No  | NA | 0  | 0  | 3  | Low-quality    | Genome-fragment | NA | 1.29  | 0     |
| S12-final-viral-combined_k141_168868 | [full]  | 1467  | No  | NA | 0  | 1  | 1  | Not-determined | Genome-fragment | NA |       | 0     |
| S12-final-viral-combined_k141_168874 | [full]  | 2074  | No  | NA | 0  | 0  | 1  | Not-determined | Genome-fragment | NA |       | 0     |
| S12-final-viral-combined_k141_269289 | [full]  | 2925  | No  | NA | 0  | 0  | 1  | Not-determined | Genome-fragment | NA |       | 0     |
| S14-final-viral-combined_k141_252029 | [full]  | 2579  | No  | NA | 0  | 0  | 1  | Low-quality    | Genome-fragment | NA | 4.35  | 0     |
| S14-final-viral-combined_k141_114162 | [full]  | 2579  | No  | NA | 0  | 0  | 0  | Low-quality    | Genome-fragment | NA | 6.42  | 0     |
| S1_k141_69200                        |         | 2579  | No  | NA | 1  | 0  | 0  | Low-quality    | Genome-fragment | NA | 46.59 | 0     |
| S7-final-viral-combined_k141_22427   | [full]  | 2579  | No  | NA | 1  | 0  | 0  | Low-quality    | Genome-fragment | NA | 4.13  | 0     |
| S12-final-viral-combined_k141_364849 | [full]  | 2579  | No  | NA | 0  | 2  | 2  | Low-quality    | Genome-fragment | NA | 3.97  | 0     |
| S12-final-viral-combined_k141_85259  | [full]  | 1564  | No  | NA | 0  | 1  | 1  | Not-determined | Genome-fragment | NA |       | 0     |
| S12-final-viral-combined_k141_302876 | [full]  | 24330 | No  | NA | 18 | 0  | 0  | Medium-quality | Genome-fragment | NA | 59.7  | 0     |
| S9_k141_39365                        |         | 2580  | No  | NA | 0  | 2  | 2  | Low-quality    | Genome-fragment | NA | 0.72  | 0     |
| S12-final-viral-combined_k141_137588 | [full]  | 1546  | No  | NA | 0  | 1  | 1  | Not-determined | Genome-fragment | NA |       | 0     |
| S5-final-viral-combined_k141_212718  | [full]  | 2580  | No  | NA | 3  | 0  | 0  | Low-quality    | Genome-fragment | NA | 3.42  | 0     |
| S17-final-viral-combined_k141_122572 | [full]  | 2580  | No  | NA | 1  | 0  | 0  | Low-quality    | Genome-fragment | NA | 4.39  | 0     |
| S17-final-viral-combined_k141_137588 | [full]  | 2580  | No  | NA | 0  | 0  | 0  | Low-quality    | Genome-fragment | NA | 6.03  | 0     |
| S12-final-viral-combined_k141_252542 | [full]  | 1367  | No  | NA | 0  | 1  | 1  | Not-determined | Genome-fragment | NA |       | 0     |
| S2-final-viral-combined_k141_235897  | [full]  | 2580  | No  | NA | 1  | 0  | 0  | Low-quality    | Genome-fragment | NA | 5.71  | 0     |
| S12-final-viral-combined_k141_68418  | [full]  | 6911  | No  | NA | 7  | 1  | 1  | Not-determined | Genome-fragment | NA |       | 0     |
| S4-final-viral-combined_k141_75487   | [full]  | 2580  | No  | NA | 3  | 0  | 0  | Low-quality    | Genome-fragment | NA | 6     | 0     |
| S8_k141_187539                       |         | 2580  | No  | NA | 2  | 0  | 0  | Low-quality    | Genome-fragment | NA | 1.95  | 0     |
| S14-final-viral-combined_k141_09089  | [full]  | 2581  | No  | NA | 1  | 0  | 0  | Low-quality    | Genome-fragment | NA | 2.33  | 0     |
| S12-final-viral-combined_k141_352837 | [full]  | 1436  | No  | NA | 1  | 0  | 1  | Not-determined | Genome-fragment | NA |       | 0     |
| S5_k141_126511                       |         | 2581  | No  | NA | 3  | 0  | 0  | Low-quality    | Genome-fragment | NA | 8.02  | 0     |
| S12-final-viral-combined_k141_302937 | [full]  | 1353  | No  | NA | 0  | 1  | 1  | Not-determined | Genome-fragment | NA |       | 0     |
| S7-final-viral-combined_k141_1450    | [full]  | 2581  | No  | NA | 0  | 0  | 0  | Low-quality    | Genome-fragment | NA | 2.48  | 0     |
| S7-final-viral-combined_k141_50236   | [full]  | 2581  | No  | NA | 0  | 2  | 2  | Low-quality    | Genome-fragment | NA | 1.23  | 0     |
| S12-final-viral-combined_k141_235889 | [full]  | 1768  | No  | NA | 0  | 2  | 2  | Not-determined | Genome-fragment | NA |       | 0     |
| S11-final-viral-combined_k141_125715 | [full]  | 2582  | No  | NA | 0  | 0  | 0  | Low-quality    | Genome-fragment | NA | 6.02  | 0     |
| S12-final-viral-combined_k141_319671 | [full]  | 5945  | No  | NA | 0  | 2  | 2  | Not-determined | Genome-fragment | NA |       | 0     |
| S12-final-viral-combined_k141_101872 | [full]  | 1424  | No  | NA | 0  | 1  | 1  | Not-determined | Genome-fragment | NA |       | 0     |
| S12-final-viral-combined_k141_252596 | [full]  | 3880  | No  | NA | 0  | 0  | 0  | Not-determined | Genome-fragment | NA |       | 0     |
| S1_k141_241905                       |         | 2582  | No  | NA | 0  | 0  | 0  | Low-quality    | Genome-fragment | NA | 7.28  | 0     |
| S12-final-viral-combined_k141_1802   | [full]  | 5356  | No  | NA | 0  | 2  | 2  | Not-determined | Genome-fragment | NA |       | 0     |
| S5-final-viral-combined_k141_27682   | [full]  | 2582  | No  | NA | 1  | 0  | 0  | Low-quality    | Genome-fragment | NA | 3.36  | 0     |
| S5-final-viral-combined_k141_194488  | [full]  | 2582  | No  | NA | 0  | 0  | 0  | Low-quality    | Genome-fragment | NA | 2.51  | 0     |
| S12-final-viral-combined_k141_118387 | [full]  | 3408  | No  | NA | 0  | 2  | 2  | Not-determined | Genome-fragment | NA |       | 0     |
| S2-final-viral-combined_k141_209667  | [full]  | 2582  | No  | NA | 2  | 0  | 0  | Low-quality    | Genome-fragment | NA | 6.13  | 0     |
| S4_k141_155225                       |         | 2582  | No  | NA | 0  | 2  | 2  | Low-quality    | Genome-fragment | NA | 4.37  | 0     |
| S12-final-viral-combined_k141_303022 | [full]  | 1391  | No  | NA | 0  | 1  | 1  | Not-determined | Genome-fragment | NA |       | 0     |
| S4_k141_122166                       |         | 2582  | No  | NA | 1  | 0  | 0  | Low-quality    | Genome-fragment | NA | 2.6   | 0     |
| S1-final-viral-combined_k141_199470  | [full]  | 2583  | No  | NA | 1  | 1  | 1  | Low-quality    | Genome-fragment | NA | 12.26 | 80.26 |
| S12-final-viral-combined_k141_235945 | [full]  | 1717  | No  | NA | 0  | 0  | 0  | Not-determined | Genome-fragment | NA |       | 0     |
| S12-final-viral-combined_k141_101942 | [full]  | 1711  | No  | NA | 0  | 0  | 0  | Not-determined | Genome-fragment | NA |       | 0     |
| S12-final-viral-combined_k141_215746 | [full]  | 4977  | No  | NA | 0  | 6  | 6  | Not-determined | Genome-fragment | NA |       | 0     |
| S12-final-viral-combined_k141_215900 | [full]  | 4714  | No  | NA | 0  | 3  | 3  | Not-determined | Genome-fragment | NA |       | 0     |
| S11-final-viral-combined_k141_319278 | [full]  | 2583  | No  | NA | 0  | 1  | 0  | Low-quality    | Genome-fragment | NA | 2.44  | 0     |
| S11-final-viral-combined_k141_297662 | [full]  | 2584  | No  | NA | 0  | 0  | 0  | Low-quality    | Genome-fragment | NA | 2.68  | 0     |
| S12-final-viral-combined_k141_169057 | [full]  | 2770  | No  | NA | 0  | 2  | 2  | Not-determined | Genome-fragment | NA |       | 0     |
| S12-final-viral-combined_k141_370082 | [full]  | 2373  | No  | NA | 0  | 0  | 0  | Not-determined | Genome-fragment | NA |       | 0     |
| S1-final-viral-combined_k141_55930   | [full]  | 2584  | No  | NA | 0  | 0  | 0  | Low-quality    | Genome-fragment | NA | 5.32  | 0     |
| S12-final-viral-combined_k141_68518  | [full]  | 4083  | No  | NA | 0  | 0  | 0  | Not-determined | Genome-fragment | NA |       | 0     |
| S12-final-viral-combined_k141_18287  | [full]  | 98430 | Yes | NA | 17 | 33 | 33 | Medium-quality | Genome-fragment | NA | 73.31 | 66.57 |
| S12-final-viral-combined_k141_85397  | [full]  | 1545  | No  | NA | 0  | 2  | 2  | Not-determined | Genome-fragment | NA |       | 0     |
| S14-final-viral-combined_k141_357156 | [full]  | 2584  | No  | NA | 0  | 0  | 0  | Low-quality    | Genome-fragment | NA | 2.96  | 0     |
| S7-final-viral-combined_k141_278771  | [full]  | 2584  | No  | NA | 0  | 1  | 1  | Not-determined | Genome-fragment | NA | 1.84  | 0     |
| S12-final-viral-combined_k141_18318  | [full]  | 1049  | No  | NA | 0  | 1  | 1  | Not-determined | Genome-fragment | NA |       | 0     |
| S12-final-viral-combined_k141_352905 | [full]  | 3932  | No  | NA | 0  | 2  | 2  | Not-determined | Genome-fragment | NA |       | 0     |
| S12-final-viral-combined_k141_102026 | [full]  | 1849  | No  | NA | 0  | 2  | 2  | Not-determined | Genome-fragment | NA |       | 0     |
| S12-final-viral-combined_k141_370112 | [full]  | 1778  | No  | NA | 0  | 0  | 0  | Not-determined | Genome-fragment | NA |       | 0     |
| S12-final-viral-combined_k141_370117 | [full]  | 1071  | No  | NA | 0  | 1  | 1  | Not-determined | Genome-fragment | NA |       | 0     |
| S8-final-viral-combined_k141_20882   | [full]  | 2584  | No  | NA | 0  | 2  | 2  | Low-quality    | Genome-fragment | NA | 1.2   | 0     |
| S12-final-viral-combined_k141_118483 | [full]  | 1725  | No  | NA | 0  | 2  | 2  | Not-determined | Genome-fragment | NA |       | 0     |
| S12-final-viral-combined_k141_152275 | [full]  | 7050  | No  | NA | 0  | 0  | 0  | Not-determined | Genome-fragment | NA |       | 0     |
| S12-final-viral-combined_k141_215215 | [full]  | 3551  | No  | NA | 0  | 3  | 3  | Not-determined | Genome-fragment | NA |       | 0     |
| S12-final-viral-combined_k141_202351 | [full]  | 3676  | No  | NA | 0  | 1  | 1  | Not-determined | Genome-fragment | NA |       | 0     |
| S8-final-viral-combined_k141_205633  | [full]  | 2584  | No  | NA | 0  | 2  | 2  | Low-quality    | Genome-fragment | NA | 3.57  | 0     |
| S12-final-viral-combined_k141_252744 | [full]  | 2768  | No  | NA | 0  | 3  | 3  | Not-determined | Genome-fragment | NA |       | 0     |
| S12-final-viral-combined_k141_370127 | [full]  | 4477  | No  | NA | 0  | 3  | 3  | Not-determined | Genome-fragment | NA |       | 0     |
| S12-final-viral-combined_k141_269459 | [full]  | 2862  | No  | NA | 0  | 1  | 1  | Not-determined | Genome-fragment | NA |       | 0     |
| S12-final-viral-combined_k141_215245 | [full]  | 1997  | No  | NA | 0  | 2  | 2  | Not-determined | Genome-fragment | NA |       | 0     |
| S12-final-viral-combined_k141_202371 | [full]  | 4970  | No  | NA | 0  | 2  | 2  | Not-determined | Genome-fragment | NA |       | 0     |
| S1-final-viral-combined_k141_209665  | [full]  | 2585  | No  | NA | 0  | 1  | 1  | Low-quality    | Genome-fragment | NA | 5.91  | 0     |
| S12-final-viral-combined_k141_236129 | [full]  | 2009  | No  | NA | 0  | 0  | 0  | Not-determined | Genome-fragment | NA |       | 0     |
| S7-final-viral-combined_k141_112927  | [full]  | 2585  | No  | NA | 0  | 1  | 1  | Low-quality    | Genome-fragment | NA | 1.84  | 0     |
| S12-final-viral-combined_k141_152353 | [full]  | 1745  | No  | NA | 0  | 1  | 1  | Not-determined | Genome-fragment | NA |       | 0     |
| S7-final-viral-combined_k141_62583   | [full]  | 2585  | No  | NA | 1  | 0  | 0  | Low-quality    | Genome-fragment | NA | 8.5   | 0     |
| S11-final-viral-combined_k141_20479  | [full]  | 2586  | No  | NA | 4  | 0  | 0  | Low-quality    | Genome-fragment | NA | 3.96  | 0     |
| S14-final-viral-combined_k141_68294  | [full]  | 2586  | No  | NA | 0  | 0  | 0  | Low-quality    | Genome-fragment | NA | 5.76  | 0     |
| S12-final-viral-combined_k141_73512  | [full]  | 2586  | No  | NA | 0  | 1  | 1  | Low-quality    | Genome-fragment | NA | 0.62  | 0     |
| S12-final-viral-combined_k141_303251 | [full]  | 2664  | No  | NA | 0  | 2  | 2  | Not-determined | Genome-fragment | NA |       | 0     |
| S12-final-viral-combined_k141_215393 | [full]  | 2908  | No  | NA | 1  | 1  | 1  | Not-determined | Genome-fragment | NA |       | 0     |
| S12-final-viral-combined_k141_236230 | [full]  | 1725  | No  | NA | 0  | 0  | 0  | Not-determined | Genome-fragment | NA |       | 0     |
| S12-final-viral-combined_k141_236231 | [full]  | 1334  | No  | NA | 0  | 0  | 0  | Not-determined | Genome-fragment | NA |       | 0     |
| S12-final-viral-combined_k141_18387  | [full]  | 1190  | No  | NA | 0  | 1  | 1  | Not-determined | Genome-fragment | NA |       | 0     |
| S12-final-viral-combined_k141_135613 | [full]  | 2078  | No  | NA | 0  | 2  | 2  | Not-determined | Genome-fragment | NA |       | 0     |
| S12-final-viral-combined_k141_202426 | [full]  | 2355  | No  | NA | 0  | 2  | 2  | Not-determined | Genome-fragment | NA |       | 0     |
| S12-final-viral-combined_k141_35516  | [full]  | 3765  | No  | NA | 0  | 3  | 3  | Not-determined | Genome-fragment | NA |       | 0     |
| S12-final-viral-combined_k141_169162 | [full]  | 1846  | No  | NA | 0  | 1  | 1  | Not-determined | Genome-fragment | NA |       | 0     |
| S12-final-viral-combined_k141_269492 | [full]  | 2601  | No  | NA | 0  | 0  | 0  | Not-determined | Genome-fragment | NA |       | 0     |
| S12-final-viral-combined_k141_353018 | [full]  | 5519  | No  | NA | 0  | 1  | 1  | Not-determined | Genome-fragment | NA |       | 0     |
| S6-final-viral-combined_k141_131031  | [full]  | 2586  | No  | NA | 0  | 0  | 0  | Low-quality    | Genome-fragment | NA | 7.71  | 0     |
| S12-final-viral-combined_k141_52054  | [full]  | 1929  | No  | NA | 0  | 3  | 3  | Not-determined | Genome-fragment | NA |       | 0     |
| S12-final-viral-combined_k141_20241  | [full]  | 1682  | No  | NA | 0  | 0  | 0  | Not-determined | Genome-fragment | NA |       | 0     |
| S12-final-viral-combined_k141_386896 | [full]  | 1154  | No  | NA | 0  | 1  | 1  | Not-determined | Genome-fragment | NA |       | 0     |
| S8_k141_41578                        |         | 2586  | No  | NA | 0  | 0  | 0  | Low-quality    | Genome-fragment | NA | 4.93  | 0     |
| S12-final-viral-combined_k141_202482 | [full]  | 2200  | No  | NA | 0  | 0  | 0  | Not-determined | Genome-fragment | NA |       | 0     |
| S11-final-viral-combined_k141_255075 | [full]  | 2587  | No  | NA | 0  | 2  | 2  | Low-quality    | Genome-fragment | NA | 2.98  | 0     |
| S14-final-viral-combined_k141_314531 | [full]  | 2587  | No  | NA | 0  | 0  | 0  | Low-quality    | Genome-fragment | NA | 1.65  | 0     |
| S1-final-viral-combined_k141_255845  | [full]  | 2587  | No  | NA | 0  | 0  | 0  | Low-quality    | Genome-fragment | NA | 6.61  | 0     |
| S12-final-viral-combined_k141_362846 | [H2gen] | 2587  | No  | NA | 1  | 0  | 0  | Low-quality    | Genome-fragment | NA | 4.31  | 0     |
| S6-final-viral-combined_k141_10950   | [full]  | 2587  | No  | NA | 0  | 1  | 1  | Low-quality    | Genome-fragment | NA | 2.72  | 0     |
| S12-final-viral-combined_k141_85527  | [full]  | 12368 | No  | NA | 0  |    |    |                |                 |    |       |       |



|                                      |          |       |     |       |    |    |                |                 |    |       |       |
|--------------------------------------|----------|-------|-----|-------|----|----|----------------|-----------------|----|-------|-------|
| S12-final-viral-combined_k141_202707 | [full]   | 4184  | No  | NA    | 0  | 3  | Not-determined | Genome-fragment | NA |       | 0     |
| S12_k141_96528                       |          | 2595  | No  | NA    | 0  | 0  | Low-quality    | Genome-fragment | NA | 1.42  | 0     |
| S12-final-viral-combined_k141_353300 | [full]   | 2948  | No  | NA    | 0  | 0  | Not-determined | Genome-fragment | NA |       | 0     |
| S8-final-viral-combined_k141_164837  | [full]   | 2595  | No  | NA    | 0  | 2  | Low-quality    | Genome-fragment | NA | 6.77  | 0     |
| S1-final-viral-combined_k141_390361  | [full]   | 2596  | No  | NA    | 1  | 0  | Low-quality    | Genome-fragment | NA | 1.24  | 0     |
| S5-final-viral-combined_k141_173731  | [full]   | 2596  | No  | NA    | 0  | 0  | Low-quality    | Genome-fragment | NA | 1.45  | 0     |
| S7-final-viral-combined_k141_723051  | [full]   | 2596  | No  | NA    | 5  | 0  | Low-quality    | Genome-fragment | NA | 6.16  | 0     |
| S12-final-viral-combined_k141_370512 | [full]   | 12515 | No  | NA    | 0  | 7  | Not-determined | Genome-fragment | NA |       | 0     |
| S7_k141_17150                        |          | 2596  | No  | NA    | 0  | 0  | Low-quality    | Genome-fragment | NA | 3.81  | 0     |
| S12-final-viral-combined_k141_135859 | [full]   | 2563  | No  | NA    | 0  | 0  | Not-determined | Genome-fragment | NA |       | 0     |
| S12-final-viral-combined_k141_186343 | [full]   | 1467  | No  | NA    | 0  | 1  | Not-determined | Genome-fragment | NA |       | 0     |
| S12-final-viral-combined_k141_169382 | [full]   | 1478  | No  | NA    | 0  | 1  | Not-determined | Genome-fragment | NA |       | 0     |
| S7_k141_7924                         |          | 2596  | No  | NA    | 1  | 0  | Low-quality    | Genome-fragment | NA | 5.51  | 0     |
| S12-final-viral-combined_k141_370543 | [full]   | 1162  | No  | NA    | 0  | 0  | Not-determined | Genome-fragment | NA |       | 0     |
| S17-final-viral-combined_k141_81557  | [full]   | 2596  | No  | NA    | 1  | 0  | Low-quality    | Genome-fragment | NA | 3.71  | 0     |
| S6-final-viral-combined_k141_353427  | [full]   | 2596  | No  | NA    | 0  | 0  | Low-quality    | Genome-fragment | NA | 0.21  | 0     |
| S8-final-viral-combined_k141_113282  | [full]   | 2596  | No  | NA    | 0  | 0  | Low-quality    | Genome-fragment | NA | 6.59  | 0     |
| S11-final-viral-combined_k141_103249 | [full]   | 2597  | No  | NA    | 4  | 0  | Low-quality    | Genome-fragment | NA | 3.94  | 0     |
| S12-final-viral-combined_k141_135929 | [full]   | 2598  | No  | NA    | 0  | 0  | Not-determined | Genome-fragment | NA |       | 0     |
| S12-final-viral-combined_k141_135932 | [full]   | 2312  | No  | NA    | 0  | 2  | Not-determined | Genome-fragment | NA |       | 0     |
| S12-final-viral-combined_k141_118957 | [full]   | 4734  | No  | NA    | 0  | 1  | Not-determined | Genome-fragment | NA |       | 0     |
| S11_k141_151896                      |          | 2597  | No  | NA    | 0  | 0  | Low-quality    | Genome-fragment | NA | 4.37  | 0     |
| S7-final-viral-combined_k141_208256  | [full]   | 2597  | No  | NA    | 0  | 3  | Low-quality    | Genome-fragment | NA | 2.15  | 0     |
| S12-final-viral-combined_k141_152789 | [full]   | 2435  | No  | NA    | 0  | 1  | Not-determined | Genome-fragment | NA |       | 0     |
| S12-final-viral-combined_k141_236277 | [full]   | 5402  | No  | NA    | 0  | 3  | Not-determined | Genome-fragment | NA |       | 0     |
| S12-final-viral-combined_k141_353427 | [full]   | 3812  | No  | NA    | 0  | 3  | Not-determined | Genome-fragment | NA |       | 0     |
| S17-final-viral-combined_k141_47873  | [full]   | 2597  | No  | NA    | 0  | 1  | Low-quality    | Genome-fragment | NA | 3.05  | 0     |
| S12-final-viral-combined_k141_236279 | [full]   | 5521  | No  | NA    | 0  | 4  | Not-determined | Genome-fragment | NA |       | 0     |
| S12-final-viral-combined_k141_230271 | [full]   | 1753  | No  | NA    | 0  | 0  | Not-determined | Genome-fragment | NA |       | 0     |
| S17-final-viral-combined_k141_116333 | [full]   | 2598  | No  | NA    | 1  | 0  | Low-quality    | Genome-fragment | NA | 5.75  | 0     |
| S12-final-viral-combined_k141_118981 | [full]   | 2877  | No  | NA    | 0  | 0  | Not-determined | Genome-fragment | NA |       | 0     |
| S12-final-viral-combined_k141_59029  | [full]   | 3180  | No  | NA    | 1  | 1  | Not-determined | Genome-fragment | NA |       | 0     |
| S12-final-viral-combined_k141_320262 | [full]   | 38035 | No  | NA    | 3  | 23 | Medium-quality | Genome-fragment | NA | 72.38 | 0     |
| S12-final-viral-combined_k141_174408 | [full]   | 2598  | No  | NA    | 3  | 0  | Low-quality    | Genome-fragment | NA | 5.45  | 0     |
| S12-final-viral-combined_k141_186426 | [full]   | 1147  | No  | NA    | 0  | 1  | Not-determined | Genome-fragment | NA |       | 0     |
| S12-final-viral-combined_k141_334481 | [full]   | 1333  | No  | NA    | 0  | 2  | Not-determined | Genome-fragment | NA |       | 0     |
| S6_k141_84733                        |          | 2598  | No  | NA    | 0  | 1  | Low-quality    | Genome-fragment | NA | 1.4   | 0     |
| S12-final-viral-combined_k141_102418 | [full]   | 2597  | No  | NA    | 0  | 1  | Not-determined | Genome-fragment | NA |       | 0     |
| S12-final-viral-combined_k141_119006 | [full]   | 4116  | No  | NA    | 0  | 5  | Not-determined | Genome-fragment | NA |       | 0     |
| S11-final-viral-combined_k141_263155 | [full]   | 2599  | Yes | 1336  | 1  | 1  | Low-quality    | Genome-fragment | NA | 0.7   | 48.6  |
| S7_k141_165441                       |          | 2599  | No  | NA    | 0  | 3  | Low-quality    | Genome-fragment | NA | 5.85  | 0     |
| S12-final-viral-combined_k141_102450 | [full]   | 2811  | No  | NA    | 0  | 1  | Not-determined | Genome-fragment | NA |       | 0     |
| S12-final-viral-combined_k141_354513 | [full]   | 2599  | No  | NA    | 3  | 0  | Low-quality    | Genome-fragment | NA | 6.87  | 0     |
| S12-final-viral-combined_k141_85827  | [full]   | 3493  | No  | NA    | 0  | 0  | Not-determined | Genome-fragment | NA |       | 0     |
| S12-final-viral-combined_k141_85828  | [full]   | 2054  | No  | NA    | 0  | 1  | Not-determined | Genome-fragment | NA |       | 0     |
| S12-final-viral-combined_k141_269833 | [full]   | 3238  | No  | NA    | 0  | 2  | Not-determined | Genome-fragment | NA |       | 0     |
| S12-final-viral-combined_k141_286910 | [full]   | 1959  | No  | NA    | 0  | 2  | Not-determined | Genome-fragment | NA |       | 0     |
| S12-final-viral-combined_k141_119039 | [full]   | 1705  | No  | NA    | 0  | 2  | Not-determined | Genome-fragment | NA |       | 0     |
| S2-final-viral-combined_k141_86807   | [full]   | 2599  | No  | NA    | 0  | 0  | Low-quality    | Genome-fragment | NA | 5.3   | 0     |
| S12-final-viral-combined_k141_202825 | [full]   | 4596  | No  | NA    | 0  | 1  | Not-determined | Genome-fragment | NA |       | 0     |
| S8-final-viral-combined_k141_190637  | [full]   | 2599  | No  | NA    | 3  | 0  | Low-quality    | Genome-fragment | NA | 5.37  | 0     |
| S12-final-viral-combined_k141_119057 | [full]   | 1815  | No  | NA    | 0  | 0  | Not-determined | Genome-fragment | NA |       | 0     |
| S3-final-viral-combined_k141_98007   | [full]   | 2600  | No  | NA    | 0  | 0  | Low-quality    | Genome-fragment | NA | 5.26  | 0     |
| S12-final-viral-combined_k141_268877 | [full]   | 1174  | No  | NA    | 0  | 1  | Not-determined | Genome-fragment | NA |       | 0     |
| S1-final-viral-combined_k141_320263  | [full]   | 2601  | Yes | 1081  | 1  | 1  | Low-quality    | Genome-fragment | NA | 2.39  | 58.44 |
| S1-final-viral-combined_k141_168853  | [full]   | 2603  | No  | NA    | 0  | 2  | Low-quality    | Genome-fragment | NA | 2.35  | 0     |
| S12-final-viral-combined_k141_253084 | [full]   | 10525 | No  | NA    | 0  | 7  | Not-determined | Genome-fragment | NA |       | 0     |
| S12-final-viral-combined_k141_102475 | [full]   | 4051  | No  | NA    | 0  | 1  | Not-determined | Genome-fragment | NA |       | 0     |
| S12-final-viral-combined_k141_155912 | [full]   | 1754  | No  | NA    | 0  | 2  | Not-determined | Genome-fragment | NA |       | 0     |
| S12-final-viral-combined_k141_69155  | [full]   | 1785  | No  | NA    | 0  | 2  | Not-determined | Genome-fragment | NA |       | 0     |
| S12-final-viral-combined_k141_119106 | [full]   | 3468  | No  | NA    | 0  | 1  | Not-determined | Genome-fragment | NA |       | 0     |
| S12-final-viral-combined_k141_202865 | [full]   | 1711  | No  | NA    | 0  | 0  | Not-determined | Genome-fragment | NA |       | 0     |
| S3-final-viral-combined_k141_6233    | [full]   | 2603  | No  | NA    | 0  | 0  | Low-quality    | Genome-fragment | NA | 6.83  | 0     |
| S12-final-viral-combined_k141_102505 | [full]   | 1293  | No  | NA    | 0  | 1  | Not-determined | Genome-fragment | NA |       | 0     |
| S3-final-viral-combined_k141_38170   | [full]   | 2603  | No  | NA    | 0  | 1  | Low-quality    | Genome-fragment | NA | 0.86  | 0     |
| S6-final-viral-combined_k141_128669  | [full]   | 2603  | No  | NA    | 0  | 1  | Low-quality    | Genome-fragment | NA | 0.82  | 0     |
| S12-final-viral-combined_k141_85940  | [full]   | 1188  | No  | NA    | 0  | 0  | Not-determined | Genome-fragment | NA |       | 0     |
| S1-final-viral-combined_k141_337568  | [full]   | 2604  | No  | NA    | 0  | 2  | Low-quality    | Genome-fragment | NA | 1.44  | 0     |
| S1_k141_62756                        |          | 2604  | No  | NA    | 0  | 0  | Low-quality    | Genome-fragment | NA | 2.31  | 0     |
| S12-final-viral-combined_k141_186643 | [full]   | 1467  | No  | NA    | 0  | 1  | Not-determined | Genome-fragment | NA |       | 0     |
| S12-final-viral-combined_k141_236456 | [full]   | 1921  | No  | NA    | 0  | 0  | Not-determined | Genome-fragment | NA |       | 0     |
| S7-final-viral-combined_k141_342455  | [full]   | 2604  | Yes | 1521  | 1  | 2  | Low-quality    | Genome-fragment | NA | 4.16  | 41.59 |
| S8-final-viral-combined_k141_162436  | [full]   | 2604  | No  | NA    | 0  | 0  | Low-quality    | Genome-fragment | NA | 17.99 | 0     |
| S12-final-viral-combined_k141_35982  | [full]   | 1427  | No  | NA    | 0  | 1  | Not-determined | Genome-fragment | NA |       | 0     |
| S12-final-viral-combined_k141_152995 | [full]   | 1789  | No  | NA    | 0  | 1  | Not-determined | Genome-fragment | NA |       | 0     |
| S12-final-viral-combined_k141_69245  | [full]   | 1686  | No  | NA    | 0  | 1  | Not-determined | Genome-fragment | NA |       | 0     |
| S12-final-viral-combined_k141_186677 | [full]   | 1012  | No  | NA    | 0  | 0  | Not-determined | Genome-fragment | NA |       | 0     |
| S8-final-viral-combined_k141_112424  | [full]   | 2605  | No  | NA    | 1  | 0  | Low-quality    | Genome-fragment | NA | 4.42  | 0     |
| S7-final-viral-combined_k141_113205  | [full]   | 2605  | No  | NA    | 0  | 2  | Low-quality    | Genome-fragment | NA | 5.01  | 0     |
| S12-final-viral-combined_k141_169553 | [full]   | 6277  | No  | NA    | 0  | 5  | Not-determined | Genome-fragment | NA |       | 0     |
| S12-final-viral-combined_k141_249822 | [full]   | 2605  | No  | NA    | 0  | 0  | Low-quality    | Genome-fragment | NA | 18.97 | 0     |
| S12-final-viral-combined_k141_320431 | [full]   | 1118  | No  | NA    | 0  | 0  | Not-determined | Genome-fragment | NA |       | 0     |
| S12-final-viral-combined_k141_56603  | [full]   | 2605  | No  | NA    | 0  | 1  | Low-quality    | Genome-fragment | NA | 3.87  | 0     |
| S12-final-viral-combined_k141_320448 | [full]   | 2710  | No  | NA    | 0  | 1  | Not-determined | Genome-fragment | NA |       | 0     |
| S12-final-viral-combined_k141_202930 | [full]   | 3879  | No  | NA    | 0  | 1  | Not-determined | Genome-fragment | NA |       | 0     |
| S12-final-viral-combined_k141_370743 | [full]   | 3865  | No  | NA    | 0  | 3  | Not-determined | Genome-fragment | NA |       | 0     |
| S12_k141_216224                      |          | 2605  | No  | NA    | 0  | 1  | Low-quality    | Genome-fragment | NA | 6.03  | 0     |
| S12-final-viral-combined_k141_2440   | [full]   | 2258  | No  | NA    | 0  | 1  | Not-determined | Genome-fragment | NA |       | 0     |
| S12-final-viral-combined_k141_252199 | [full]   | 6204  | No  | NA    | 0  | 3  | Not-determined | Genome-fragment | NA |       | 0     |
| S12-final-viral-combined_k141_52623  | [full]   | 1795  | No  | NA    | 0  | 2  | Not-determined | Genome-fragment | NA |       | 0     |
| S12-final-viral-combined_k141_18738  | [full]   | 4825  | No  | NA    | 0  | 1  | Not-determined | Genome-fragment | NA |       | 0     |
| S2-final-viral-combined_k141_113811  | [full]   | 2605  | No  | NA    | 0  | 0  | Low-quality    | Genome-fragment | NA | 0.91  | 0     |
| S12-final-viral-combined_k141_287093 | [full]   | 2265  | No  | NA    | 0  | 0  | Not-determined | Genome-fragment | NA |       | 0     |
| S12-final-viral-combined_k141_69358  | [full]   | 1879  | No  | NA    | 0  | 1  | Not-determined | Genome-fragment | NA |       | 0     |
| S4-final-viral-combined_k141_337215  | [full]   | 2606  | No  | NA    | 0  | 2  | Low-quality    | Genome-fragment | NA | 0.73  | 0     |
| S1-final-viral-combined_k141_287038  | [full]   | 2607  | No  | NA    | 1  | 0  | Low-quality    | Genome-fragment | NA | 4.36  | 0     |
| S7-final-viral-combined_k141_228762  | [full]   | 2607  | No  | NA    | 2  | 0  | Low-quality    | Genome-fragment | NA | 5.76  | 0     |
| S12-final-viral-combined_k141_303944 | [full]   | 7836  | No  | NA    | 0  | 1  | Not-determined | Genome-fragment | NA |       | 0     |
| S7_k141_51466                        |          | 2607  | No  | NA    | 2  | 0  | Low-quality    | Genome-fragment | NA | 5.82  | 0     |
| S12-final-viral-combined_k141_287115 | [full]   | 9609  | No  | NA    | 0  | 8  | Not-determined | Genome-fragment | NA |       | 0     |
| S12-final-viral-combined_k141_36038  | [full]   | 16145 | No  | NA    | 0  | 4  | Not-determined | Genome-fragment | NA |       | 0     |
| S12-final-viral-combined_k141_203020 | [full]   | 2679  | No  | NA    | 0  | 3  | Not-determined | Genome-fragment | NA |       | 0     |
| S2_k141_136247                       |          | 2607  | No  | NA    | 3  | 0  | Low-quality    | Genome-fragment | NA | 5.98  | 0     |
| S12-final-viral-combined_k141_2450   | [full]   | 81938 | Yes | 32513 | 12 | 26 | Medium-quality | Genome-fragment | NA | 60.16 | 60.32 |
| S12-final-viral-combined_k141_187164 | [full]   | 1945  | No  | NA    | 0  | 2  | Not-determined | Genome-fragment | NA |       | 0     |
| S12-final-viral-combined_k141_36051  | [full]   | 8386  | No  | NA    | 0  | 3  | Not-determined | Genome-fragment | NA |       | 0     |
| S12-final-viral-combined_k141_287148 | [full]   | 1526  | No  | NA    | 0  | 0  | Not-determined | Genome-fragment | NA |       | 0     |
| S12-final-viral-combined_k141_52746  | [full]   | 4771  | No  | NA    | 0  | 5  | Not-determined | Genome-fragment | NA |       | 0     |
| S4_k141_160384                       |          | 2607  | No  | NA    | 0  | 1  | Low-quality    | Genome-fragment | NA | 2.5   | 0     |
| S12-final-viral-combined_k141_187951 | [full]   | 1602  | No  | NA    | 0  | 1  | Not-determined | Genome-fragment | NA |       | 0     |
| S8-final-viral-combined_k141_138445  | [full]   | 2607  | No  | NA    | 1  | 0  | Low-quality    | Genome-fragment | NA | 1.75  | 0     |
| S11-final-viral-combined_k141_174530 | [full]   | 2608  | No  | NA    | 0  | 0  | Low-quality    | Genome-fragment | NA | 0.73  | 0     |
| S12-final-viral-combined_k141_304019 | [full]   | 1811  | No  | NA    | 0  | 1  | Not-determined | Genome-fragment | NA |       | 0     |
| S12-final-viral-combined_k141_353758 | [full]   | 3703  | No  | NA    | 0  | 2  | Not-determined | Genome-fragment | NA |       | 0     |
| S12-final-viral-combined_k141_236480 | [full]   | 1604  | No  | NA    | 0  | 1  | Not-determined | Genome-fragment | NA |       | 0     |
| S1-final-viral-combined_k141_71073   | [full]   | 2608  | No  | NA    | 2  | 0  | Low-quality    | Genome-fragment | NA | 5.97  | 0     |
| S12-final-viral-combined_k141_169717 | [full]   | 6742  | No  | NA    | 0  | 3  | Not-determined | Genome-fragment | NA |       | 0     |
| S12-final-viral-combined_k141_353765 | [full]   | 2363  | No  | NA    | 0  | 0  | Not-determined | Genome-fragment | NA |       | 0     |
| S12-final-viral-combined_k141_169719 | [full]   | 2797  | No  | NA    | 0  | 3  | Not-determined | Genome-fragment | NA |       | 0     |
| S12-final-viral-combined_k141_255343 | [full]   | 2608  | No  | NA    | 2  | 0  | Low-quality    | Genome-fragment | NA | 7.72  | 0     |
| S4-final-viral-combined_k141_117761  | [full]   | 2608  | No  | NA    | 0  | 3  | Low-quality    | Genome-fragment | NA | 0.83  | 0     |
| S8-final-viral-combined_k141_162270  | [H2gene] | 2608  | No  | NA    | 0  | 0  | Low-quality    | Genome-fragment | NA | 1.4   | 0     |
| S12-final-viral-combined_k141_169743 | [full]   | 2782  | No  | NA    | 0  | 1  |                |                 |    |       |       |



|                                      |        |        |     |      |    |    |                |                 |    |       |       |
|--------------------------------------|--------|--------|-----|------|----|----|----------------|-----------------|----|-------|-------|
| S12-final-viral-combined_k141_287357 | [full] | 2214   | No  | NA   | 0  | 2  | Not-determined | Genome-fragment | NA | 0     | 0     |
| S12-final-viral-combined_k141_263056 | [full] | 3382   | No  | NA   | 0  | 2  | Not-determined | Genome-fragment | NA | 0     | 0     |
| S1-final-viral-combined_k141_10887   | [full] | 2616   | No  | NA   | 0  | 2  | Low-quality    | Genome-fragment | NA | 1.18  | 0     |
| S12-final-viral-combined_k141_186971 | [full] | 3090   | No  | NA   | 0  | 2  | Not-determined | Genome-fragment | NA | 0     | 0     |
| S12-final-viral-combined_k141_32992  | [full] | 2616   | No  | NA   | 1  | 0  | Low-quality    | Genome-fragment | NA | 6.88  | 0     |
| S6-final-viral-combined_k141_121086  | [full] | 2617   | No  | NA   | 5  | 0  | Low-quality    | Genome-fragment | NA | 4.06  | 0     |
| S12-final-viral-combined_k141_52894  | [full] | 3288   | No  | NA   | 0  | 3  | Not-determined | Genome-fragment | NA | 0     | 0     |
| S12-final-viral-combined_k141_52895  | [full] | 5889   | No  | NA   | 0  | 5  | Not-determined | Genome-fragment | NA | 0     | 0     |
| S12-final-viral-combined_k141_330740 | [full] | 1512   | No  | NA   | 0  | 2  | Not-determined | Genome-fragment | NA | 0     | 0     |
| S12-final-viral-combined_k141_52898  | [full] | 8405   | No  | NA   | 0  | 4  | Not-determined | Genome-fragment | NA | 0     | 0     |
| S12-final-viral-combined_k141_219968 | [full] | 1428   | No  | NA   | 0  | 0  | Not-determined | Genome-fragment | NA | 0     | 0     |
| S8-final-viral-combined_k141_386165  | [full] | 2617   | Yes | 1361 | 1  | 1  | Low-quality    | Genome-fragment | NA | 0.86  | 47.99 |
| S12-final-viral-combined_k141_287417 | [full] | 1982   | No  | NA   | 0  | 1  | Not-determined | Genome-fragment | NA | 0     | 0     |
| S12-final-viral-combined_k141_203338 | [full] | 2626   | No  | NA   | 0  | 1  | Not-determined | Genome-fragment | NA | 0     | 0     |
| S11-final-viral-combined_k141_323259 | [full] | 2618   | No  | NA   | 0  | 2  | Low-quality    | Genome-fragment | NA | 3.8   | 0     |
| S12-final-viral-combined_k141_270274 | [full] | 4327   | No  | NA   | 2  | 0  | Not-determined | Genome-fragment | NA | 0     | 0     |
| S1-final-viral-combined_k141_321833  | [full] | 2618   | No  | NA   | 4  | 0  | Low-quality    | Genome-fragment | NA | 7.64  | 0     |
| S9-final-viral-combined_k141_921     | [full] | 2619   | No  | NA   | 3  | 0  | Low-quality    | Genome-fragment | NA | 4.82  | 0     |
| S12-final-viral-combined_k141_262493 | [full] | 4512   | No  | NA   | 0  | 1  | Not-determined | Genome-fragment | NA | 0     | 0     |
| S12-final-viral-combined_k141_102844 | [full] | 4092   | No  | NA   | 0  | 3  | Not-determined | Genome-fragment | NA | 0     | 0     |
| S11-final-viral-combined_k141_308166 | [full] | 2619   | No  | NA   | 1  | 0  | Low-quality    | Genome-fragment | NA | 4.19  | 0     |
| S12-final-viral-combined_k141_230272 | [full] | 178383 | No  | NA   | 11 | 37 | High-quality   | High-quality    | NA | 56.18 | 0     |
| S3-final-viral-combined_k141_49147   | [full] | 2619   | No  | NA   | 0  | 2  | Low-quality    | Genome-fragment | NA | 1.21  | 0     |
| S12-final-viral-combined_k141_270322 | [full] | 1616   | No  | NA   | 0  | 1  | Not-determined | Genome-fragment | NA | 0     | 0     |
| S4-final-viral-combined_k141_19940   | [full] | 2619   | No  | NA   | 0  | 2  | Low-quality    | Genome-fragment | NA | 0.83  | 0     |
| S4_k141_92360                        | [full] | 2619   | No  | NA   | 2  | 0  | Low-quality    | Genome-fragment | NA | 4.3   | 0     |
| S12-final-viral-combined_k141_119531 | [full] | 1689   | No  | NA   | 0  | 1  | Not-determined | Genome-fragment | NA | 0     | 0     |
| S9-final-viral-combined_k141_76521   | [full] | 2620   | No  | NA   | 3  | 0  | Low-quality    | Genome-fragment | NA | 4.91  | 0     |
| S12-final-viral-combined_k141_73393  | [full] | 2620   | No  | NA   | 0  | 0  | Low-quality    | Genome-fragment | NA | 4.95  | 0     |
| S12-final-viral-combined_k141_99427  | [full] | 2620   | No  | NA   | 0  | 3  | Low-quality    | Genome-fragment | NA | 2.03  | 0     |
| S12-final-viral-combined_k141_36322  | [full] | 11523  | No  | NA   | 0  | 10 | Not-determined | Genome-fragment | NA | 0     | 0     |
| S12-final-viral-combined_k141_156958 | [full] | 2621   | No  | NA   | 0  | 0  | Low-quality    | Genome-fragment | NA | 4.23  | 0     |
| S4-final-viral-combined_k141_76797   | [full] | 2621   | No  | NA   | 0  | 2  | Low-quality    | Genome-fragment | NA | 3.07  | 0     |
| S5_k141_205078                       | [full] | 2623   | No  | NA   | 0  | 1  | Low-quality    | Genome-fragment | NA | 2.63  | 0     |
| S12-final-viral-combined_k141_2008   | [full] | 4975   | No  | NA   | 0  | 2  | Not-determined | Genome-fragment | NA | 0     | 0     |
| S12-final-viral-combined_k141_287321 | [full] | 1658   | No  | NA   | 0  | 0  | Not-determined | Genome-fragment | NA | 0     | 0     |
| S5-final-viral-combined_k141_182051  | [full] | 2625   | No  | NA   | 0  | 2  | Low-quality    | Genome-fragment | NA | 5.18  | 0     |
| S17-final-viral-combined_k141_144035 | [full] | 2625   | No  | NA   | 1  | 0  | Low-quality    | Genome-fragment | NA | 5.97  | 0     |
| S12-final-viral-combined_k141_529931 | [full] | 284    | No  | NA   | 0  | 1  | Not-determined | Genome-fragment | NA | 0     | 0     |
| S12-final-viral-combined_k141_371234 | [full] | 1929   | No  | NA   | 0  | 0  | Not-determined | Genome-fragment | NA | 0     | 0     |
| S12-final-viral-combined_k141_86420  | [full] | 1970   | No  | NA   | 0  | 0  | Not-determined | Genome-fragment | NA | 0     | 0     |
| S12-final-viral-combined_k141_253550 | [full] | 3338   | No  | NA   | 0  | 2  | Not-determined | Genome-fragment | NA | 0     | 0     |
| S11_k141_222458                      | [full] | 2626   | No  | NA   | 0  | 0  | Low-quality    | Genome-fragment | NA | 9.16  | 0     |
| S12-final-viral-combined_k141_119648 | [full] | 1234   | No  | NA   | 0  | 1  | Not-determined | Genome-fragment | NA | 0     | 0     |
| S12-final-viral-combined_k141_253567 | [full] | 6361   | No  | NA   | 0  | 6  | Not-determined | Genome-fragment | NA | 0     | 0     |
| S12-final-viral-combined_k141_231075 | [full] | 1441   | No  | NA   | 0  | 1  | Not-determined | Genome-fragment | NA | 0     | 0     |
| S12-final-viral-combined_k141_36418  | [full] | 1196   | No  | NA   | 0  | 0  | Not-determined | Genome-fragment | NA | 0     | 0     |
| S12-final-viral-combined_k141_304388 | [full] | 1136   | No  | NA   | 0  | 2  | Not-determined | Genome-fragment | NA | 0     | 0     |
| S17-final-viral-combined_k141_354671 | [full] | 2626   | No  | NA   | 0  | 0  | Low-quality    | Genome-fragment | NA | 2.72  | 0     |
| S12-final-viral-combined_k141_203543 | [full] | 1862   | No  | NA   | 0  | 2  | Not-determined | Genome-fragment | NA | 0     | 0     |
| S12-final-viral-combined_k141_187241 | [full] | 15382  | No  | NA   | 0  | 10 | Not-determined | Genome-fragment | NA | 0     | 0     |
| S12-final-viral-combined_k141_2933   | [full] | 1642   | No  | NA   | 0  | 0  | Not-determined | Genome-fragment | NA | 0     | 0     |
| S8_k141_58166                        | [full] | 2626   | No  | NA   | 0  | 0  | Low-quality    | Genome-fragment | NA | 1.99  | 0     |
| S12-final-viral-combined_k141_304432 | [full] | 9485   | No  | NA   | 0  | 6  | Not-determined | Genome-fragment | NA | 0     | 0     |
| S12-final-viral-combined_k141_27320  | [full] | 1281   | No  | NA   | 0  | 1  | Not-determined | Genome-fragment | NA | 0     | 0     |
| S12-final-viral-combined_k141_53050  | [full] | 1475   | No  | NA   | 0  | 2  | Not-determined | Genome-fragment | NA | 0     | 0     |
| S12-final-viral-combined_k141_336954 | [full] | 2432   | No  | NA   | 0  | 2  | Not-determined | Genome-fragment | NA | 0     | 0     |
| S11-final-viral-combined_k141_305883 | [full] | 2627   | No  | NA   | 2  | 0  | Low-quality    | Genome-fragment | NA | 3.19  | 0     |
| S12-final-viral-combined_k141_336958 | [full] | 2623   | No  | NA   | 0  | 2  | Not-determined | Genome-fragment | NA | 0     | 0     |
| S1-final-viral-combined_k141_436673  | [full] | 2627   | No  | NA   | 0  | 0  | Low-quality    | Genome-fragment | NA | 6.51  | 0     |
| S12-final-viral-combined_k141_2991   | [full] | 3076   | No  | NA   | 0  | 0  | Not-determined | Genome-fragment | NA | 0     | 0     |
| S12-final-viral-combined_k141_304473 | [full] | 2088   | No  | NA   | 0  | 0  | Not-determined | Genome-fragment | NA | 0     | 0     |
| S12-final-viral-combined_k141_53093  | [full] | 1579   | No  | NA   | 0  | 1  | Not-determined | Genome-fragment | NA | 0     | 0     |
| S12-final-viral-combined_k141_270523 | [full] | 6587   | No  | NA   | 0  | 3  | Not-determined | Genome-fragment | NA | 0     | 0     |
| S5-final-viral-combined_k141_34680   | [full] | 2627   | No  | NA   | 0  | 0  | Low-quality    | Genome-fragment | NA | 4.83  | 0     |
| S12-final-viral-combined_k141_320885 | [full] | 1189   | No  | NA   | 0  | 0  | Not-determined | Genome-fragment | NA | 0     | 0     |
| S7-final-viral-combined_k141_52633   | [full] | 2627   | No  | NA   | 0  | 2  | Low-quality    | Genome-fragment | NA | 2.07  | 0     |
| S12-final-viral-combined_k141_306396 | [full] | 2627   | No  | NA   | 0  | 0  | Low-quality    | Genome-fragment | NA | 3.69  | 0     |
| S5_k141_145079                       | [full] | 2628   | No  | NA   | 0  | 1  | Low-quality    | Genome-fragment | NA | 1.09  | 0     |
| S12-final-viral-combined_k141_119789 | [full] | 8101   | No  | NA   | 0  | 4  | Not-determined | Genome-fragment | NA | 0     | 0     |
| S7-final-viral-combined_k141_9856    | [full] | 2628   | No  | NA   | 0  | 1  | Low-quality    | Genome-fragment | NA | 5.13  | 0     |
| S12-final-viral-combined_k141_201651 | [full] | 4028   | No  | NA   | 0  | 0  | Not-determined | Genome-fragment | NA | 0     | 0     |
| S12-final-viral-combined_k141_19184  | [full] | 1454   | No  | NA   | 0  | 1  | Not-determined | Genome-fragment | NA | 0     | 0     |
| S11-final-viral-combined_k141_107756 | [full] | 2629   | No  | NA   | 2  | 0  | Low-quality    | Genome-fragment | NA | 3.23  | 0     |
| S12-final-viral-combined_k141_26551  | [full] | 1006   | No  | NA   | 0  | 0  | Not-determined | Genome-fragment | NA | 0     | 0     |
| S17-final-viral-combined_k141_69828  | [full] | 2629   | No  | NA   | 0  | 1  | Low-quality    | Genome-fragment | NA | 6.17  | 0     |
| S12-final-viral-combined_k141_40025  | [full] | 2629   | No  | NA   | 0  | 3  | Low-quality    | Genome-fragment | NA | 5.1   | 0     |
| S12-final-viral-combined_k141_70159  | [full] | 3883   | No  | NA   | 0  | 0  | Not-determined | Genome-fragment | NA | 0     | 0     |
| S12-final-viral-combined_k141_287931 | [full] | 2324   | No  | NA   | 0  | 2  | Not-determined | Genome-fragment | NA | 0     | 0     |
| S2-final-viral-combined_k141_82995   | [full] | 2629   | No  | NA   | 1  | 0  | Low-quality    | Genome-fragment | NA | 1.28  | 0     |
| S8-final-viral-combined_k141_126604  | [full] | 2629   | No  | NA   | 0  | 1  | Low-quality    | Genome-fragment | NA | 5.04  | 0     |
| S11-final-viral-combined_k141_213840 | [full] | 2630   | No  | NA   | 0  | 3  | Low-quality    | Genome-fragment | NA | 1.66  | 0     |
| S12-final-viral-combined_k141_36544  | [full] | 1434   | No  | NA   | 0  | 1  | Not-determined | Genome-fragment | NA | 0     | 0     |
| S12-final-viral-combined_k141_237252 | [full] | 1988   | No  | NA   | 0  | 2  | Not-determined | Genome-fragment | NA | 0     | 0     |
| S12-final-viral-combined_k141_136868 | [full] | 1827   | No  | NA   | 0  | 2  | Not-determined | Genome-fragment | NA | 0     | 0     |
| S1-final-viral-combined_k141_195260  | [full] | 2630   | No  | NA   | 0  | 1  | Low-quality    | Genome-fragment | NA | 1.84  | 0     |
| S12-final-viral-combined_k141_220292 | [full] | 1802   | No  | NA   | 0  | 1  | Not-determined | Genome-fragment | NA | 0     | 0     |
| S12-final-viral-combined_k141_203685 | [full] | 3785   | No  | NA   | 0  | 1  | Not-determined | Genome-fragment | NA | 0     | 0     |
| S12-final-viral-combined_k141_220296 | [full] | 1004   | No  | NA   | 0  | 0  | Not-determined | Genome-fragment | NA | 0     | 0     |
| S12-final-viral-combined_k141_270629 | [full] | 2724   | No  | NA   | 0  | 1  | Not-determined | Genome-fragment | NA | 0     | 0     |
| S12-final-viral-combined_k141_173897 | [full] | 2631   | No  | NA   | 2  | 0  | Low-quality    | Genome-fragment | NA | 6.72  | 0     |
| S12-final-viral-combined_k141_220310 | [full] | 1948   | No  | NA   | 0  | 0  | Not-determined | Genome-fragment | NA | 0     | 0     |
| S12-final-viral-combined_k141_3066   | [full] | 10875  | No  | NA   | 0  | 7  | Not-determined | Genome-fragment | NA | 0     | 0     |
| S12-final-viral-combined_k141_226585 | [full] | 2631   | No  | NA   | 0  | 1  | Low-quality    | Genome-fragment | NA | 3.09  | 0     |
| S8-final-viral-combined_k141_258164  | [full] | 2631   | No  | NA   | 0  | 1  | Low-quality    | Genome-fragment | NA | 3.28  | 0     |
| S12-final-viral-combined_k141_220317 | [full] | 1021   | No  | NA   | 0  | 0  | Not-determined | Genome-fragment | NA | 0     | 0     |
| S12-final-viral-combined_k141_220321 | [full] | 1608   | No  | NA   | 0  | 1  | Not-determined | Genome-fragment | NA | 0     | 0     |
| S12-final-viral-combined_k141_37434  | [full] | 1223   | No  | NA   | 0  | 0  | Not-determined | Genome-fragment | NA | 0     | 0     |
| S11-final-viral-combined_k141_374471 | [full] | 2632   | No  | NA   | 0  | 1  | Low-quality    | Genome-fragment | NA | 1.86  | 0     |
| S1-final-viral-combined_k141_48545   | [full] | 2632   | No  | NA   | 0  | 0  | Low-quality    | Genome-fragment | NA | 2.18  | 0     |
| S12-final-viral-combined_k141_86641  | [full] | 2769   | No  | NA   | 0  | 4  | Not-determined | Genome-fragment | NA | 0     | 0     |
| S12-final-viral-combined_k141_151608 | [full] | 6813   | No  | NA   | 0  | 0  | Not-determined | Genome-fragment | NA | 0     | 0     |
| S12-final-viral-combined_k141_170346 | [full] | 1625   | No  | NA   | 0  | 0  | Not-determined | Genome-fragment | NA | 0     | 0     |
| S12-final-viral-combined_k141_124487 | [full] | 2632   | No  | NA   | 0  | 0  | Low-quality    | Genome-fragment | NA | 6.86  | 0     |
| S6-final-viral-combined_k141_17409   | [full] | 2632   | No  | NA   | 0  | 0  | Low-quality    | Genome-fragment | NA | 3.21  | 0     |
| S12-final-viral-combined_k141_387927 | [full] | 1202   | No  | NA   | 0  | 0  | Not-determined | Genome-fragment | NA | 0     | 0     |
| S8-final-viral-combined_k141_7635    | [full] | 2632   | No  | NA   | 0  | 0  | Low-quality    | Genome-fragment | NA | 1.52  | 0     |
| S12-final-viral-combined_k141_202762 | [full] | 5231   | No  | NA   | 0  | 4  | Not-determined | Genome-fragment | NA | 0     | 0     |
| S12-final-viral-combined_k141_220403 | [full] | 2135   | No  | NA   | 0  | 3  | Not-determined | Genome-fragment | NA | 0     | 0     |
| S12-final-viral-combined_k141_203764 | [full] | 1601   | No  | NA   | 0  | 0  | Not-determined | Genome-fragment | NA | 0     | 0     |
| S12-final-viral-combined_k141_103100 | [full] | 3295   | No  | NA   | 0  | 2  | Not-determined | Genome-fragment | NA | 6.12  | 0     |
| S11-final-viral-combined_k141_212762 | [full] | 2633   | No  | NA   | 0  | 1  | Low-quality    | Genome-fragment | NA | 0     | 0     |
| S3-final-viral-combined_k141_3969    | [full] | 2633   | No  | NA   | 0  | 2  | Low-quality    | Genome-fragment | NA | 1.17  | 0     |
| S12-final-viral-combined_k141_3148   | [full] | 1977   | No  | NA   | 0  | 2  | Not-determined | Genome-fragment | NA | 7.04  | 0     |
| S12-final-viral-combined_k141_473781 | [full] | 2633   | No  | NA   | 0  | 0  | Low-quality    | Genome-fragment | NA | 0     | 0     |
| S12-final-viral-combined_k141_136996 | [full] | 1674   | No  | NA   | 0  | 1  | Not-determined | Genome-fragment | NA | 0     | 0     |
| S12-final-viral-combined_k141_304613 | [full] | 1556   | No  | NA   | 0  | 1  | Not-determined | Genome-fragment | NA | 0     | 0     |
| S12-final-viral-combined_k141_187463 | [full] | 4564   | No  | NA   | 0  | 0  | Not-determined | Genome-fragment | NA | 0     | 0     |
| S12-final-viral-combined_k141_30462  | [full] | 3076   | No  | NA   | 0  | 0  | Not-determined | Genome-fragment | NA | 0     | 0     |
| S5-final-viral-combined_k141_22963   | [full] | 2634   | Yes | 2348 | 1  | 1  | Low-quality    | Genome-fragment | NA | 3.15  | 10.86 |
| S5_k141_129524                       | [full] | 2634   | No  | NA   | 1  | 0  | Low-quality    | Genome-fragment | NA | 6.27  | 0     |
| S12-final-viral-com                  |        |        |     |      |    |    |                |                 |    |       |       |



|                                      |          |       |     |    |       |    |                |                 |       |       |
|--------------------------------------|----------|-------|-----|----|-------|----|----------------|-----------------|-------|-------|
| S1-final-viral-combined_k141_496961  | [full]   | 2641  | No  | NA | 0     | 2  | Low-quality    | Genome-fragment | 1.98  | 0     |
| S1-final-viral-combined_k141_150531  | [full]   | 2641  | No  | NA | 0     | 0  | Low-quality    | Genome-fragment | 5.63  | 0     |
| S12-final-viral-combined_k141_304787 | [full]   | 3779  | No  | NA | 0     | 0  | Not-determined | Genome-fragment | NA    | 0     |
| S12-final-viral-combined_k141_206109 | [full]   | 2641  | No  | NA | 0     | 0  | Low-quality    | Genome-fragment | 1.75  | 0     |
| S12-final-viral-combined_k141_337466 | [full]   | 1063  | No  | NA | 0     | 2  | Not-determined | Genome-fragment | NA    | 0     |
| S1-final-viral-combined_k141_278791  | [full]   | 2642  | No  | NA | 1     | 0  | Low-quality    | Genome-fragment | 1.4   | 0     |
| S12-final-viral-combined_k141_53511  | [full]   | 2009  | No  | NA | 0     | 0  | Not-determined | Genome-fragment | NA    | 0     |
| S12-final-viral-combined_k141_120072 | [full]   | 1317  | No  | NA | 0     | 0  | Not-determined | Genome-fragment | NA    | 0     |
| S1_k141_305650                       |          | 2642  | No  | NA | 0     | 0  | Low-quality    | Genome-fragment | 32.07 | 0     |
| S5-final-viral-combined_k141_131545  | [full]   | 2642  | No  | NA | 0     | 0  | Low-quality    | Genome-fragment | 6.5   | 0     |
| S17-final-viral-combined_k141_186141 | [full]   | 2642  | No  | NA | 0     | 0  | Low-quality    | Genome-fragment | 2.71  | 0     |
| S12-final-viral-combined_k141_237621 | [full]   | 2678  | No  | NA | 0     | 0  | Not-determined | Genome-fragment | NA    | 0     |
| S12-final-viral-combined_k141_220648 | [full]   | 16404 | No  | NA | 0     | 11 | Not-determined | Genome-fragment | NA    | 0     |
| S12-final-viral-combined_k141_354505 | [full]   | 2741  | No  | NA | 0     | 0  | Not-determined | Genome-fragment | NA    | 0     |
| S12-final-viral-combined_k141_70539  | [full]   | 2088  | No  | NA | 0     | 0  | Not-determined | Genome-fragment | NA    | 0     |
| S12-final-viral-combined_k141_357321 | [full]   | 2642  | No  | NA | 0     | 0  | Low-quality    | Genome-fragment | 2.92  | 0     |
| S1-final-viral-combined_k141_200344  | [full]   | 2643  | No  | NA | 0     | 0  | Low-quality    | Genome-fragment | 4.5   | 0     |
| S12-final-viral-combined_k141_69786  | [full]   | 2643  | No  | NA | 1     | 0  | Low-quality    | Genome-fragment | 5.57  | 0     |
| S12-final-viral-combined_k141_170851 | [full]   | 1564  | No  | NA | 0     | 1  | Not-determined | Genome-fragment | NA    | 0     |
| S12-final-viral-combined_k141_244123 | [H2gene] | 2643  | No  | NA | 1     | 0  | Low-quality    | Genome-fragment | 1.96  | 0     |
| S12-final-viral-combined_k141_287937 | [full]   | 1202  | No  | NA | 0     | 1  | Not-determined | Genome-fragment | NA    | 0     |
| S12-final-viral-combined_k141_389206 | [full]   | 1123  | No  | NA | 0     | 0  | Not-determined | Genome-fragment | NA    | 0     |
| S12-final-viral-combined_k141_270898 | [full]   | 1051  | No  | NA | 0     | 0  | Not-determined | Genome-fragment | NA    | 0     |
| S6-final-viral-combined_k141_78806   | [full]   | 2643  | No  | NA | 1     | 0  | Low-quality    | Genome-fragment | 4.81  | 0     |
| S12-final-viral-combined_k141_86937  | [full]   | 1611  | No  | NA | 0     | 0  | Not-determined | Genome-fragment | NA    | 0     |
| S12-final-viral-combined_k141_86940  | [full]   | 4138  | No  | NA | 0     | 2  | Not-determined | Genome-fragment | NA    | 0     |
| S12-final-viral-combined_k141_287973 | [full]   | 1008  | No  | NA | 0     | 0  | Not-determined | Genome-fragment | NA    | 0     |
| S6_k141_41535                        |          | 2643  | No  | NA | 1     | 0  | Low-quality    | Genome-fragment | 8.2   | 0     |
| S12-final-viral-combined_k141_287999 | [full]   | 2367  | No  | NA | 0     | 1  | Not-determined | Genome-fragment | NA    | 0     |
| S8-final-viral-combined_k141_164316  | [full]   | 2643  | No  | NA | 4     | 0  | Low-quality    | Genome-fragment | 6.73  | 0     |
| S1-final-viral-combined_k141_364989  | [full]   | 2644  | No  | NA | 0     | 0  | Low-quality    | Genome-fragment | 6.88  | 0     |
| S1-final-viral-combined_k141_122545  | [full]   | 2644  | No  | NA | 1     | 0  | Low-quality    | Genome-fragment | 4.59  | 0     |
| S12-final-viral-combined_k141_288014 | [full]   | 5345  | No  | NA | 0     | 3  | Not-determined | Genome-fragment | NA    | 0     |
| S5-final-viral-combined_k141_111093  | [full]   | 2644  | No  | NA | 3     | 0  | Low-quality    | Genome-fragment | 5.05  | 0     |
| S12-final-viral-combined_k141_204160 | [full]   | 2582  | No  | NA | 0     | 3  | Not-determined | Genome-fragment | NA    | 0     |
| S12-final-viral-combined_k141_204184 | [full]   | 2061  | No  | NA | 0     | 2  | Not-determined | Genome-fragment | NA    | 0     |
| S12-final-viral-combined_k141_3440   | [full]   | 9871  | No  | NA | 0     | 5  | Not-determined | Genome-fragment | NA    | 0     |
| S12-final-viral-combined_k141_288026 | [full]   | 10642 | No  | NA | 0     | 5  | Not-determined | Genome-fragment | NA    | 0     |
| S12_k141_11548                       |          | 2644  | No  | NA | 0     | 1  | Low-quality    | Genome-fragment | 5.98  | 0     |
| S12-final-viral-combined_k141_388296 | [full]   | 1716  | No  | NA | 0     | 2  | Not-determined | Genome-fragment | NA    | 0     |
| S12-final-viral-combined_k141_120133 | [full]   | 43578 | Yes | NA | 29566 | 19 | Medium-quality | Genome-fragment | 86.79 | 32.15 |
| S4-final-viral-combined_k141_19321   | [full]   | 2644  | No  | NA | 0     | 1  | Low-quality    | Genome-fragment | 5.56  | 0     |
| S12-final-viral-combined_k141_19780  | [full]   | 5050  | No  | NA | 0     | 3  | Not-determined | Genome-fragment | NA    | 0     |
| S8-final-viral-combined_k141_228464  | [full]   | 2644  | No  | NA | 0     | 0  | Low-quality    | Genome-fragment | 5.57  | 0     |
| S9-final-viral-combined_k141_103851  | [full]   | 2645  | No  | NA | 0     | 0  | Low-quality    | Genome-fragment | 1.03  | 0     |
| S7-final-viral-combined_k141_215171  | [full]   | 2645  | No  | NA | 0     | 0  | Low-quality    | Genome-fragment | 3.49  | 0     |
| S12-final-viral-combined_k141_137325 | [full]   | 1349  | No  | NA | 0     | 0  | Not-determined | Genome-fragment | NA    | 0     |
| S12-final-viral-combined_k141_204258 | [full]   | 1648  | No  | NA | 0     | 1  | Not-determined | Genome-fragment | NA    | 0     |
| S12-final-viral-combined_k141_3499   | [full]   | 2341  | No  | NA | 0     | 1  | Not-determined | Genome-fragment | NA    | 0     |
| S8-final-viral-combined_k141_772147  | [full]   | 2645  | No  | NA | 0     | 2  | Low-quality    | Genome-fragment | 3.75  | 0     |
| S9-final-viral-combined_k141_105817  | [full]   | 2646  | No  | NA | 0     | 2  | Low-quality    | Genome-fragment | 6.35  | 0     |
| S12-final-viral-combined_k141_204941 | [full]   | 3395  | No  | NA | 0     | 0  | Not-determined | Genome-fragment | NA    | 0     |
| S12-final-viral-combined_k141_354622 | [full]   | 3876  | No  | NA | 0     | 3  | Not-determined | Genome-fragment | NA    | 0     |
| S12-final-viral-combined_k141_323372 | [full]   | 2019  | No  | NA | 0     | 0  | Not-determined | Genome-fragment | NA    | 0     |
| S12-final-viral-combined_k141_86885  | [full]   | 3807  | No  | NA | 0     | 4  | Not-determined | Genome-fragment | NA    | 0     |
| S12-final-viral-combined_k141_105351 | [full]   | 3704  | No  | NA | 0     | 3  | Not-determined | Genome-fragment | NA    | 0     |
| S1-final-viral-combined_k141_298341  | [full]   | 2646  | No  | NA | 0     | 0  | Low-quality    | Genome-fragment | 4.66  | 0     |
| S12-final-viral-combined_k141_23532  | [full]   | 1035  | No  | NA | 0     | 0  | Not-determined | Genome-fragment | NA    | 0     |
| S3-final-viral-combined_k141_2372    | [full]   | 2646  | No  | NA | 1     | 0  | Low-quality    | Genome-fragment | 4.42  | 0     |
| S17-final-viral-combined_k141_240370 | [full]   | 2646  | No  | NA | 1     | 0  | Low-quality    | Genome-fragment | 5.92  | 0     |
| S9-final-viral-combined_k141_83818   | [full]   | 2647  | Yes | NA | 1537  | 1  | Low-quality    | Genome-fragment | 0.84  | 41.93 |
| S9-final-viral-combined_k141_82373   | [full]   | 2647  | No  | NA | 3     | 0  | Low-quality    | Genome-fragment | 7.14  | 0     |
| S12-final-viral-combined_k141_305029 | [full]   | 2790  | No  | NA | 0     | 2  | Not-determined | Genome-fragment | NA    | 0     |
| S11-final-viral-combined_k141_166426 | [full]   | 2647  | No  | NA | 1     | 0  | Low-quality    | Genome-fragment | 4.09  | 0     |
| S12-final-viral-combined_k141_371851 | [full]   | 1024  | No  | NA | 0     | 2  | Not-determined | Genome-fragment | NA    | 0     |
| S2-final-viral-combined_k141_131356  | [full]   | 2648  | No  | NA | 0     | 1  | Low-quality    | Genome-fragment | 3.32  | 0     |
| S12-final-viral-combined_k141_103626 | [full]   | 1114  | No  | NA | 0     | 0  | Not-determined | Genome-fragment | NA    | 0     |
| S6-final-viral-combined_k141_41208   | [full]   | 2649  | No  | NA | 0     | 4  | Low-quality    | Genome-fragment | 5.65  | 0     |
| S1-final-viral-combined_k141_1927    | [full]   | 2650  | No  | NA | 0     | 0  | Low-quality    | Genome-fragment | 7.68  | 0     |
| S3-final-viral-combined_k141_93678   | [full]   | 2650  | No  | NA | 2     | 0  | Low-quality    | Genome-fragment | 7.16  | 0     |
| S7-final-viral-combined_k141_96669   | [full]   | 2650  | No  | NA | 0     | 2  | Low-quality    | Genome-fragment | 0.82  | 0     |
| S7-final-viral-combined_k141_160317  | [full]   | 2650  | No  | NA | 1     | 0  | Low-quality    | Genome-fragment | 2.52  | 0     |
| S7-final-viral-combined_k141_233481  | [full]   | 2650  | No  | NA | 1     | 1  | Low-quality    | Genome-fragment | 5.26  | 0     |
| S17-final-viral-combined_k141_84451  | [full]   | 2650  | No  | NA | 0     | 0  | Low-quality    | Genome-fragment | 5.83  | 0     |
| S12-final-viral-combined_k141_237751 | [full]   | 4994  | No  | NA | 0     | 2  | Not-determined | Genome-fragment | NA    | 0     |
| S12-final-viral-combined_k141_3600   | [full]   | 10525 | No  | NA | 0     | 2  | Not-determined | Genome-fragment | NA    | 0     |
| S12-final-viral-combined_k141_339346 | [full]   | 2650  | No  | NA | 4     | 0  | Low-quality    | Genome-fragment | 7.36  | 0     |
| S11-final-viral-combined_k141_1185   | [full]   | 2651  | No  | NA | 0     | 1  | Low-quality    | Genome-fragment | 2.18  | 0     |
| S1-final-viral-combined_k141_316448  | [full]   | 2651  | No  | NA | 1     | 0  | Low-quality    | Genome-fragment | 4.37  | 0     |
| S17-k141_98269                       |          | 2651  | No  | NA | 0     | 0  | Low-quality    | Genome-fragment | 5.52  | 0     |
| S12-final-viral-combined_k141_170975 | [full]   | 5771  | No  | NA | 0     | 1  | Not-determined | Genome-fragment | NA    | 0     |
| S12-final-viral-combined_k141_103691 | [full]   | 3159  | No  | NA | 0     | 2  | Not-determined | Genome-fragment | NA    | 0     |
| S12-final-viral-combined_k141_288263 | [full]   | 1733  | No  | NA | 0     | 1  | Not-determined | Genome-fragment | NA    | 0     |
| S12-final-viral-combined_k141_288287 | [full]   | 1412  | No  | NA | 0     | 0  | Not-determined | Genome-fragment | NA    | 0     |
| S1-final-viral-combined_k141_232918  | [full]   | 2652  | Yes | NA | 1900  | 1  | Low-quality    | Genome-fragment | 4.24  | 28.36 |
| S5-final-viral-combined_k141_18907   | [full]   | 2652  | No  | NA | 0     | 0  | Low-quality    | Genome-fragment | 6.28  | 0     |
| S5-final-viral-combined_k141_162864  | [full]   | 2652  | No  | NA | 3     | 0  | Low-quality    | Genome-fragment | 4.43  | 0     |
| S12-final-viral-combined_k141_27475  | [full]   | 2652  | No  | NA | 0     | 1  | Low-quality    | Genome-fragment | 4.9   | 0     |
| S4-final-viral-combined_k141_16144   | [full]   | 2652  | No  | NA | 0     | 2  | Low-quality    | Genome-fragment | 0.84  | 0     |
| S5-final-viral-combined_k141_104899  | [full]   | 2653  | No  | NA | 0     | 0  | Low-quality    | Genome-fragment | 5.38  | 0     |
| S12-final-viral-combined_k141_87151  | [full]   | 1936  | No  | NA | 0     | 2  | Not-determined | Genome-fragment | NA    | 0     |
| S4-final-viral-combined_k141_126817  | [full]   | 2653  | No  | NA | 2     | 0  | Low-quality    | Genome-fragment | 3.26  | 0     |
| S3_k141_2425                         |          | 2654  | No  | NA | 0     | 1  | Low-quality    | Genome-fragment | 2.41  | 0     |
| S12-final-viral-combined_k141_154181 | [full]   | 2628  | No  | NA | 0     | 1  | Not-determined | Genome-fragment | NA    | 0     |
| S12-final-viral-combined_k141_25478  | [full]   | 1079  | No  | NA | 0     | 1  | Not-determined | Genome-fragment | NA    | 0     |
| S12-final-viral-combined_k141_271086 | [full]   | 5684  | No  | NA | 0     | 4  | Not-determined | Genome-fragment | NA    | 0     |
| S12-final-viral-combined_k141_3702   | [full]   | 1522  | No  | NA | 0     | 2  | Not-determined | Genome-fragment | NA    | 0     |
| S12-final-viral-combined_k141_204381 | [full]   | 1252  | No  | NA | 0     | 2  | Not-determined | Genome-fragment | NA    | 0     |
| S12-final-viral-combined_k141_53608  | [full]   | 2248  | No  | NA | 0     | 2  | Not-determined | Genome-fragment | NA    | 0     |
| S7-final-viral-combined_k141_140325  | [full]   | 2654  | No  | NA | 1     | 0  | Low-quality    | Genome-fragment | 6.69  | 0     |
| S12-final-viral-combined_k141_337620 | [full]   | 2620  | No  | NA | 0     | 0  | Not-determined | Genome-fragment | NA    | 0     |
| S12-final-viral-combined_k141_271131 | [full]   | 9708  | No  | NA | 0     | 9  | Not-determined | Genome-fragment | NA    | 0     |
| S4-final-viral-combined_k141_85018   | [full]   | 2654  | No  | NA | 0     | 3  | Low-quality    | Genome-fragment | 1.64  | 0     |
| S8_k141_58352                        |          | 2654  | No  | NA | 0     | 2  | Low-quality    | Genome-fragment | 2.76  | 0     |
| S12-final-viral-combined_k141_120220 | [full]   | 1170  | No  | NA | 0     | 0  | Not-determined | Genome-fragment | NA    | 0     |
| S1-final-viral-combined_k141_59321   | [full]   | 2655  | No  | NA | 1     | 0  | Low-quality    | Genome-fragment | 7.24  | 0     |
| S12-final-viral-combined_k141_271126 | [full]   | 2633  | No  | NA | 0     | 0  | Not-determined | Genome-fragment | NA    | 0     |
| S12-final-viral-combined_k141_220880 | [full]   | 1835  | No  | NA | 0     | 2  | Not-determined | Genome-fragment | NA    | 0     |
| S12-final-viral-combined_k141_371996 | [full]   | 1348  | No  | NA | 0     | 0  | Not-determined | Genome-fragment | NA    | 0     |
| S12-final-viral-combined_k141_188086 | [full]   | 6673  | No  | NA | 0     | 4  | Not-determined | Genome-fragment | NA    | 0     |
| S12-final-viral-combined_k141_305248 | [full]   | 1996  | No  | NA | 0     | 0  | Not-determined | Genome-fragment | NA    | 0     |
| S12-final-viral-combined_k141_28453  | [full]   | 1347  | No  | NA | 0     | 1  | Not-determined | Genome-fragment | NA    | 0     |
| S12-final-viral-combined_k141_20114  | [full]   | 1155  | No  | NA | 0     | 0  | Not-determined | Genome-fragment | NA    | 0     |
| S17-final-viral-combined_k141_97657  | [full]   | 2655  | No  | NA | 0     | 0  | Low-quality    | Genome-fragment | 3.21  | 0     |
| S12-final-viral-combined_k141_28837  | [full]   | 2268  | No  | NA | 0     | 1  | Not-determined | Genome-fragment | NA    | 0     |
| S12-final-viral-combined_k141_388574 | [full]   | 7468  | No  | NA | 0     | 0  | Not-determined | Genome-fragment | NA    | 0     |
| S12-final-viral-combined_k141_103806 | [full]   | 1440  | No  | NA | 0     | 2  | Not-determined | Genome-fragment | NA    | 0     |
| S2_k141_198064                       |          | 2655  | No  | NA | 0     | 3  | Low-quality    | Genome-fragment | 5.93  | 0     |
| S12-final-viral-combined_k141_372071 | [full]   | 1303  | No  | NA | 0     | 1  | Not-determined | Genome-fragment | NA    | 0     |
| S12-final-viral-combined_k141_188137 | [full]   | 6246  | No  | NA | 0     | 0  | Not-determined | Genome-fragment | NA    | 0     |
| S11-final-viral-combined_k141_27035  | [full]   | 2656  | No  | NA | 0     | 2  | Low-quality    | Genome-fragment | 1.89  | 0     |
| S12-final-viral-combined_k141_237865 | [full]   | 2655  | No  | NA | 0     | 1  | Not-determined | Genome-fragment | NA    | 0     |
| S11-final-viral-combined_k141_210126 | [full]   | 2656  | No  | NA | 0     | 1  | Low-quality    | Genome-fragment | 2.16  | 0     |
| S12-final-viral-combined_k141_354794 | [full]   | 2042  | No  | NA | 0     | 1  | Not-determined | Genome-fragment | NA    | 0     |
| S12-final-viral-combined_k141_288487 | [full]   | 2162  | No  | NA | 0     | 1  | Not-determined | Genome-fragment | NA    | 0     |
| S12-final-viral-combined_k141_372110 | [full]   | 4192  | No  | NA | 0     | 2  | Not-determined | Genome-fragment | NA    | 0     |
| S12-final-viral-combined_k141_103856 | [full]   | 1484  | No  | NA | 0     | 0  | Not-determined | Genome-fragment | NA    | 0     |
| S5-final-viral-combined_k141_33131   | [full]   | 2656  | No  | NA | 0     | 2  | Low-quality    | Genome-fragment | NA    | 0     |
| S12-final-viral-combined_k141_3822   | [full]   | 3612  | No  | NA | 0     | 1  | Not-determined |                 |       |       |



|                                      |       |     |      |    |   |                  |                 |       |       |
|--------------------------------------|-------|-----|------|----|---|------------------|-----------------|-------|-------|
| 56_k141_131828                       | 2662  | No  | NA   | 0  | 0 | Low-quality      | Genome-fragment | 5.64  | 0     |
| S12-final-viral-combined_k141_53019  | 9574  | No  | NA   | 0  | 2 | Not-determined   | Genome-fragment | NA    | 0     |
| S12-final-viral-combined_k141_204538 | 1300  | No  | NA   | 0  | 0 | Not-determined   | Genome-fragment | NA    | 0     |
| S12-final-viral-combined_k141_171190 | 1051  | No  | NA   | 0  | 0 | Not-determined   | Genome-fragment | NA    | 0     |
| S9-final-viral-combined_k141_42549   | 2663  | No  | NA   | 4  | 0 | Low-quality      | Genome-fragment | 6.08  | 0     |
| S6-final-viral-combined_k141_108325  | 2663  | No  | NA   | 0  | 0 | Low-quality      | Genome-fragment | 6.03  | 0     |
| S1_k141_20293                        | 2664  | No  | NA   | 0  | 1 | Low-quality      | Genome-fragment | 5.33  | 0     |
| S12-final-viral-combined_k141_104041 | 3711  | No  | NA   | 0  | 0 | Not-determined   | Genome-fragment | NA    | 0     |
| S12-final-viral-combined_k141_53901  | 1916  | No  | NA   | 0  | 2 | Not-determined   | Genome-fragment | NA    | 0     |
| S12-final-viral-combined_k141_254407 | 3547  | No  | NA   | 0  | 2 | Not-determined   | Genome-fragment | NA    | 0     |
| S12-final-viral-combined_k141_388909 | 1669  | No  | NA   | 0  | 2 | Not-determined   | Genome-fragment | NA    | 0     |
| S12-final-viral-combined_k141_221261 | 3038  | No  | NA   | 0  | 0 | Not-determined   | Genome-fragment | NA    | 0     |
| S12-final-viral-combined_k141_238224 | 2428  | No  | NA   | 0  | 2 | Not-determined   | Genome-fragment | NA    | 0     |
| S7-final-viral-combined_k141_232128  | 2664  | No  | NA   | 3  | 0 | Low-quality      | Genome-fragment | 5.93  | 0     |
| S12-final-viral-combined_k141_321953 | 1790  | No  | NA   | 0  | 2 | Not-determined   | Genome-fragment | NA    | 0     |
| S12-final-viral-combined_k141_204861 | 7055  | No  | NA   | 0  | 0 | Not-determined   | Genome-fragment | NA    | 0     |
| S17-k141_112235                      | 2664  | No  | NA   | 0  | 4 | Low-quality      | Genome-fragment | 1.81  | 0     |
| S12-final-viral-combined_k141_355025 | 2809  | No  | NA   | 0  | 1 | Not-determined   | Genome-fragment | NA    | 0     |
| S12-final-viral-combined_k141_204581 | 1951  | No  | NA   | 0  | 2 | Not-determined   | Genome-fragment | NA    | 0     |
| S12-final-viral-combined_k141_338233 | 3000  | No  | NA   | 0  | 2 | Not-determined   | Genome-fragment | NA    | 0     |
| S12-final-viral-combined_k141_20507  | 2682  | No  | NA   | 0  | 5 | Not-determined   | Genome-fragment | NA    | 0     |
| S12_k141_306392                      | 2664  | No  | NA   | 0  | 0 | Low-quality      | Genome-fragment | 4.69  | 0     |
| S12-final-viral-combined_k141_338243 | 3171  | No  | NA   | 0  | 2 | Not-determined   | Genome-fragment | NA    | 0     |
| S11-final-viral-combined_k141_296465 | 2665  | Yes | 2050 | 1  | 1 | Low-quality      | Genome-fragment | 1.51  | 23.08 |
| S12-final-viral-combined_k141_305576 | 1858  | No  | NA   | 0  | 0 | Not-determined   | Genome-fragment | NA    | 0     |
| S1-final-viral-combined_k141_158121  | 2665  | No  | NA   | 0  | 0 | Low-quality      | Genome-fragment | 1.95  | 0     |
| S12-final-viral-combined_k141_271562 | 1171  | No  | NA   | 0  | 1 | Not-determined   | Genome-fragment | NA    | 0     |
| S12-final-viral-combined_k141_154508 | 1215  | No  | NA   | 0  | 2 | Not-determined   | Genome-fragment | NA    | 0     |
| S12-final-viral-combined_k141_104098 | 1445  | No  | NA   | 0  | 0 | Not-determined   | Genome-fragment | NA    | 0     |
| S12-final-viral-combined_k141_210041 | 2665  | No  | NA   | 0  | 1 | Low-quality      | Genome-fragment | 4.62  | 0     |
| S12-final-viral-combined_k141_54021  | 2383  | No  | NA   | 0  | 2 | Not-determined   | Genome-fragment | NA    | 0     |
| S12-final-viral-combined_k141_104861 | 1073  | No  | NA   | 0  | 1 | Not-determined   | Genome-fragment | NA    | 0     |
| S12-final-viral-combined_k141_71235  | 22756 | No  | NA   | 17 | 1 | Medium-quality   | Genome-fragment | 64.99 | 0     |
| S12-final-viral-combined_k141_137917 | 1060  | No  | NA   | 0  | 0 | Not-determined   | Genome-fragment | NA    | 0     |
| S12-final-viral-combined_k141_221226 | 2185  | No  | NA   | 0  | 2 | Not-determined   | Genome-fragment | NA    | 0     |
| S12-final-viral-combined_k141_338016 | 2665  | No  | NA   | 0  | 0 | Low-quality      | Genome-fragment | 4.82  | 0     |
| S12-final-viral-combined_k141_338284 | 3141  | No  | NA   | 0  | 1 | Not-determined   | Genome-fragment | NA    | 0     |
| S12-final-viral-combined_k141_39971  | 3490  | No  | NA   | 0  | 3 | Not-determined   | Genome-fragment | NA    | 0     |
| S12-final-viral-combined_k141_204676 | 2486  | No  | NA   | 0  | 3 | Not-determined   | Genome-fragment | NA    | 0     |
| S12-final-viral-combined_k141_316494 | 2665  | No  | NA   | 1  | 0 | Low-quality      | Genome-fragment | 6.96  | 0     |
| S2-final-viral-combined_k141_100890  | 2665  | No  | NA   | 0  | 0 | Low-quality      | Genome-fragment | 5.44  | 0     |
| S1_k141_201208                       | 2666  | No  | NA   | 1  | 0 | Low-quality      | Genome-fragment | 5.63  | 0     |
| S12-final-viral-combined_k141_355068 | 3221  | No  | NA   | 0  | 0 | Not-determined   | Genome-fragment | NA    | 0     |
| S17-final-viral-combined_k141_172489 | 2666  | No  | NA   | 2  | 0 | Low-quality      | Genome-fragment | 6.86  | 0     |
| S12-final-viral-combined_k141_355072 | 3262  | No  | NA   | 0  | 0 | Not-determined   | Genome-fragment | NA    | 0     |
| S12-final-viral-combined_k141_311886 | 2666  | No  | NA   | 0  | 0 | Low-quality      | Genome-fragment | 3.23  | 0     |
| S12-final-viral-combined_k141_288681 | 1824  | No  | NA   | 0  | 0 | Not-determined   | Genome-fragment | NA    | 0     |
| S12-final-viral-combined_k141_321211 | 2514  | No  | NA   | 0  | 1 | Not-determined   | Genome-fragment | NA    | 0     |
| S12-final-viral-combined_k141_372497 | 3817  | No  | NA   | 0  | 0 | Not-determined   | Genome-fragment | NA    | 0     |
| S12-final-viral-combined_k141_154640 | 4524  | No  | NA   | 0  | 2 | Not-determined   | Genome-fragment | NA    | 0     |
| S2-final-viral-combined_k141_97051   | 2666  | No  | NA   | 1  | 0 | Low-quality      | Genome-fragment | 4.89  | 0     |
| S7-final-viral-combined_k141_88451   | 2667  | No  | NA   | 1  | 0 | Low-quality      | Genome-fragment | 7.35  | 0     |
| S12-final-viral-combined_k141_171396 | 2156  | No  | NA   | 0  | 1 | Not-determined   | Genome-fragment | NA    | 0     |
| S12-final-viral-combined_k141_271705 | 6123  | No  | NA   | 0  | 4 | Not-determined   | Genome-fragment | NA    | 0     |
| S12-final-viral-combined_k141_104221 | 2692  | No  | NA   | 0  | 0 | Not-determined   | Genome-fragment | NA    | 0     |
| S12-final-viral-combined_k141_547371 | 1397  | No  | NA   | 0  | 1 | Not-determined   | Genome-fragment | NA    | 0     |
| S12-final-viral-combined_k141_275994 | 2667  | No  | NA   | 0  | 1 | Low-quality      | Genome-fragment | 6.49  | 0     |
| S12-final-viral-combined_k141_205755 | 3202  | No  | NA   | 0  | 2 | Not-determined   | Genome-fragment | NA    | 0     |
| S12-final-viral-combined_k141_188461 | 1261  | No  | NA   | 0  | 0 | Not-determined   | Genome-fragment | NA    | 0     |
| S12-final-viral-combined_k141_355162 | 4807  | No  | NA   | 0  | 3 | Not-determined   | Genome-fragment | NA    | 0     |
| S8-final-viral-combined_k141_7701    | 2667  | No  | NA   | 0  | 0 | Low-quality      | Genome-fragment | 4.95  | 0     |
| S9-final-viral-combined_k141_211261  | 2668  | No  | NA   | 1  | 0 | Low-quality      | Genome-fragment | 6.43  | 0     |
| S8_k141_146630                       | 2668  | No  | NA   | 1  | 0 | Low-quality      | Genome-fragment | 2.36  | 0     |
| S12-final-viral-combined_k141_221392 | 2212  | No  | NA   | 0  | 0 | Not-determined   | Genome-fragment | NA    | 0     |
| S12-final-viral-combined_k141_542626 | 3880  | No  | NA   | 0  | 0 | Not-determined   | Genome-fragment | NA    | 0     |
| S3-final-viral-combined_k141_829051  | 2669  | No  | NA   | 0  | 0 | Low-quality      | Genome-fragment | 0.97  | 0     |
| S12-final-viral-combined_k141_221414 | 1367  | No  | NA   | 0  | 0 | Not-determined   | Genome-fragment | NA    | 0     |
| S17-final-viral-combined_k141_204977 | 2669  | No  | NA   | 2  | 0 | Low-quality      | Genome-fragment | 5.83  | 0     |
| S12-final-viral-combined_k141_238426 | 9712  | No  | NA   | 0  | 0 | Not-determined   | Genome-fragment | NA    | 0     |
| S12-final-viral-combined_k141_134382 | 2669  | No  | NA   | 0  | 0 | Low-quality      | Genome-fragment | 6.09  | 0     |
| S1-final-viral-combined_k141_155203  | 2670  | No  | NA   | 0  | 2 | Low-quality      | Genome-fragment | 1.93  | 0     |
| S12-final-viral-combined_k141_171500 | 5207  | No  | NA   | 0  | 4 | Not-determined   | Genome-fragment | NA    | 0     |
| S12-final-viral-combined_k141_4138   | 1634  | No  | NA   | 0  | 0 | Not-determined   | Genome-fragment | NA    | 0     |
| S1_k141_101129                       | 2670  | No  | NA   | 0  | 0 | Low-quality      | Genome-fragment | 4.88  | 0     |
| S12-final-viral-combined_k141_120783 | 1590  | No  | NA   | 0  | 0 | Not-determined   | Genome-fragment | NA    | 0     |
| S12-final-viral-combined_k141_271843 | 2749  | No  | NA   | 0  | 2 | Not-determined   | Genome-fragment | NA    | 0     |
| S12-final-viral-combined_k141_71568  | 3046  | No  | NA   | 0  | 1 | Not-determined   | Genome-fragment | NA    | 0     |
| S5-final-viral-combined_k141_129479  | 2670  | No  | NA   | 1  | 0 | Low-quality      | Genome-fragment | 7.01  | 0     |
| S12-final-viral-combined_k141_189758 | 1886  | No  | NA   | 0  | 3 | Not-determined   | Genome-fragment | NA    | 0     |
| S7-final-viral-combined_k141_69537   | 2670  | No  | NA   | 0  | 2 | Low-quality      | Genome-fragment | 1.81  | 0     |
| S12-final-viral-combined_k141_175259 | 1173  | No  | NA   | 0  | 1 | Not-determined   | Genome-fragment | NA    | 0     |
| S17-final-viral-combined_k141_73941  | 2670  | No  | NA   | 2  | 0 | Low-quality      | Genome-fragment | 4.95  | 0     |
| S8_k141_22061                        | 2670  | No  | NA   | 1  | 0 | Low-quality      | Genome-fragment | 2.13  | 0     |
| S12-final-viral-combined_k141_203755 | 2671  | No  | NA   | 0  | 1 | Low-quality      | Genome-fragment | 3.56  | 0     |
| S3-final-viral-combined_k141_524909  | 2671  | No  | NA   | 0  | 0 | Low-quality      | Genome-fragment | 5.63  | 0     |
| S12-final-viral-combined_k141_221490 | 1195  | No  | NA   | 0  | 1 | Not-determined   | Genome-fragment | NA    | 0     |
| S2_k141_182966                       | 2671  | No  | NA   | 0  | 0 | Low-quality      | Genome-fragment | 4.46  | 0     |
| S12-final-viral-combined_k141_188778 | 5980  | No  | NA   | 0  | 4 | Not-determined   | Genome-fragment | NA    | 0     |
| S8_k141_272364                       | 2671  | No  | NA   | 1  | 0 | Low-quality      | Genome-fragment | 2.39  | 0     |
| S11-final-viral-combined_k141_300689 | 2672  | No  | NA   | 1  | 0 | Low-quality      | Genome-fragment | 1.35  | 0     |
| S12-final-viral-combined_k141_238421 | 2672  | Yes | 1244 | 1  | 1 | Low-quality      | Genome-fragment | 1.92  | 53.44 |
| S2-final-viral-combined_k141_476401  | 2672  | No  | NA   | 0  | 0 | Low-quality      | Genome-fragment | 0.32  | 0     |
| S12-final-viral-combined_k141_238454 | 9824  | No  | NA   | 0  | 6 | Not-determined   | Genome-fragment | NA    | 0     |
| S12-final-viral-combined_k141_542651 | 5238  | No  | NA   | 0  | 1 | Not-determined   | Genome-fragment | NA    | 0     |
| S12-final-viral-combined_k141_322336 | 2422  | No  | NA   | 0  | 1 | Not-determined   | Genome-fragment | NA    | 0     |
| S8-final-viral-combined_k141_137787  | 2672  | No  | NA   | 0  | 1 | Low-quality      | Genome-fragment | 4.72  | 0     |
| S11-final-viral-combined_k141_179785 | 2673  | No  | NA   | 2  | 0 | Low-quality      | Genome-fragment | 3.88  | 0     |
| S12-final-viral-combined_k141_104364 | 2608  | No  | NA   | 0  | 0 | Not-determined   | Genome-fragment | NA    | 0     |
| S12-final-viral-combined_k141_271951 | 1661  | No  | NA   | 0  | 2 | Not-determined   | Genome-fragment | NA    | 0     |
| S12-final-viral-combined_k141_238475 | 2465  | No  | NA   | 0  | 0 | Not-determined   | Genome-fragment | NA    | 0     |
| S12-final-viral-combined_k141_543031 | 1034  | No  | NA   | 0  | 0 | 1 Not-determined | Genome-fragment | NA    | 0     |
| S12-final-viral-combined_k141_154861 | 1313  | No  | NA   | 0  | 0 | Not-determined   | Genome-fragment | NA    | 0     |
| S5-final-viral-combined_k141_140102  | 2673  | No  | NA   | 0  | 2 | Low-quality      | Genome-fragment | 2.88  | 0     |
| S12-final-viral-combined_k141_355358 | 4686  | No  | NA   | 0  | 3 | Not-determined   | Genome-fragment | NA    | 0     |
| S7-final-viral-combined_k141_136615  | 2674  | No  | NA   | 0  | 0 | Low-quality      | Genome-fragment | 6.37  | 0     |
| S7-final-viral-combined_k141_128737  | 2674  | No  | NA   | 3  | 0 | Low-quality      | Genome-fragment | 5.9   | 0     |
| S12-final-viral-combined_k141_154892 | 1162  | No  | NA   | 0  | 0 | Not-determined   | Genome-fragment | NA    | 0     |
| S12-final-viral-combined_k141_254836 | 1304  | No  | NA   | 0  | 0 | Not-determined   | Genome-fragment | NA    | 0     |
| S17-final-viral-combined_k141_201522 | 2674  | No  | NA   | 0  | 0 | Low-quality      | Genome-fragment | 3.31  | 0     |
| S17-final-viral-combined_k141_250629 | 2675  | No  | NA   | 6  | 0 | Low-quality      | Genome-fragment | 6.11  | 0     |
| S12_k141_208865                      | 2675  | No  | NA   | 0  | 2 | Low-quality      | Genome-fragment | 1.89  | 0     |
| S6-final-viral-combined_k141_121255  | 2675  | No  | NA   | 0  | 0 | Low-quality      | Genome-fragment | 0     | 5     |
| S5-final-viral-combined_k141_156784  | 2676  | No  | NA   | 1  | 0 | Low-quality      | Genome-fragment | 4.77  | 0     |
| S12-final-viral-combined_k141_154924 | 1739  | No  | NA   | 0  | 1 | Not-determined   | Genome-fragment | NA    | 0     |
| S12-final-viral-combined_k141_221661 | 1702  | No  | NA   | 0  | 0 | Not-determined   | Genome-fragment | NA    | 0     |
| S12-final-viral-combined_k141_356871 | 2676  | No  | NA   | 1  | 0 | Low-quality      | Genome-fragment | 1.85  | 0     |
| S12-final-viral-combined_k141_154933 | 2134  | No  | NA   | 0  | 2 | Not-determined   | Genome-fragment | NA    | 0     |
| S1-final-viral-combined_k141_362443  | 2677  | No  | NA   | 0  | 0 | Low-quality      | Genome-fragment | 43.38 | 0     |
| S5-final-viral-combined_k141_111179  | 2677  | No  | NA   | 1  | 0 | Low-quality      | Genome-fragment | 4.65  | 0     |
| S12-final-viral-combined_k141_194791 | 2677  | No  | NA   | 0  | 2 | Low-quality      | Genome-fragment | 4.61  | 0     |
| S12-final-viral-combined_k141_205020 | 4400  | No  | NA   | 0  | 3 | Not-determined   | Genome-fragment | NA    | 0     |
| S12-final-viral-combined_k141_235971 | 2677  | No  | NA   | 0  | 0 | Low-quality      | Genome-fragment | 5.98  | 0     |
| S12-final-viral-combined_k141_120962 | 4180  | No  | NA   | 0  | 2 | Not-determined   | Genome-fragment | NA    | 0     |
| S12-final-viral-combined_k141_205028 | 1133  | No  | NA   | 0  | 0 | Not-determined   | Genome-fragment | NA    | 0     |
| S12-final-viral-combined_k141_138380 | 6909  | No  | NA   | 0  | 1 | Not-determined   | Genome-fragment | NA    | 0     |
| S12-final-viral-combined_k141_322432 | 1515  | No  | NA   | 0  | 1 | Not-determined   | Genome-fragment | NA    | 0     |
| S4-final-viral-combined_k141_143647  | 2677  | No  | NA   | 1  | 0 | Low-quality      | Genome-fragment | 4.67  | 0     |
| S11-final-viral-combined_k141_186161 | 2678  | No  | NA   | 0  | 0 | Low-quality      | Genome-fragment | 1.21  | 0     |
| S12-final-viral-combined_k141_209231 | 2332  | No  | NA   | 0  | 3 | Not-determined   | Genome-fragment | NA    | 0     |
| S12-final-viral-combined_k141_205050 | 1835  | No  | NA   | 0  | 3 | Not-determined   | Genome-fragment | NA    | 0     |
| S1-final-viral-combined_k141_189381  | 2678  | No  | NA   | 1  | 0 | Low-quality      | Genome-fragment | 4.05  | 0     |
| S12-final-viral-combined_k141_711841 | 1224  | No  | NA   | 0  | 2 | Not-determined   | Genome-fragment | NA    | 0     |
| S12-final-viral-combined_k141_120980 | 2128  | No  | NA   | 0  | 0 | Not-determined   | Genome-fragment | NA    | 0     |
| S12-final-viral-combined_k141_238517 | 2396  | No  | NA   | 0  | 0 | Not-determined   | Genome-fragment | NA    | 0     |
| S12-final-viral-combined_k141_338777 | 2939  | No  | NA   | 0  | 0 | Not-determined   | Genome-fragment | NA    | 0     |
| S12-final-viral-combined_k141_12121  | 1121  | No  | NA   | 0  | 1 | Not-determined   | Genome-fragment | NA    | 0     |
| S12-final-viral-combined_k141_254870 | 15731 | No  | NA   | 0  | 8 | Not-determined   | Genome-fragment | NA    | 0     |
| S12-final-viral-com                  |       |     |      |    |   |                  |                 |       |       |



|                                      |        |       |     |       |    |    |                |                 |    |       |       |
|--------------------------------------|--------|-------|-----|-------|----|----|----------------|-----------------|----|-------|-------|
| S12-final-viral-combined_k141_87972  | [full] | 1814  | No  | NA    | 0  | 1  | Not-determined | Genome-fragment | NA | 0     | 0     |
| S12-final-viral-combined_k141_27272  | [full] | 3296  | No  | NA    | 0  | 2  | Not-determined | Genome-fragment | NA | 0     | 0     |
| S2-final-viral-combined_k141_143326  | [full] | 2680  | No  | NA    | 0  | 1  | Low-quality    | Genome-fragment | NA | 0.84  | 0     |
| S12-final-viral-combined_k141_289231 | [full] | 16211 | No  | NA    | 0  | 3  | Not-determined | Genome-fragment | NA | 0     | 0     |
| S12-final-viral-combined_k141_88032  | [full] | 3761  | No  | NA    | 0  | 0  | Not-determined | Genome-fragment | NA | 0     | 0     |
| S2-final-viral-combined_k141_7837    | [full] | 2680  | No  | NA    | 1  | 0  | Low-quality    | Genome-fragment | NA | 5.39  | 0     |
| S12-final-viral-combined_k141_389562 | [full] | 1583  | No  | NA    | 0  | 0  | Not-determined | Genome-fragment | NA | 0     | 0     |
| S12-final-viral-combined_k141_322640 | [full] | 2346  | No  | NA    | 0  | 0  | Not-determined | Genome-fragment | NA | 0     | 0     |
| S12-final-viral-combined_k141_289770 | [full] | 1016  | No  | NA    | 0  | 2  | Not-determined | Genome-fragment | NA | 0     | 0     |
| S7-final-viral-combined_k141_244878  | [full] | 2681  | No  | NA    | 0  | 1  | Low-quality    | Genome-fragment | NA | 1.42  | 0     |
| S12-final-viral-combined_k141_88033  | [full] | 2752  | No  | NA    | 0  | 1  | Not-determined | Genome-fragment | NA | 0     | 0     |
| S2-final-viral-combined_k141_212138  | [full] | 2681  | No  | NA    | 0  | 0  | Low-quality    | Genome-fragment | NA | 5.28  | 0     |
| S2-final-viral-combined_k141_8865    | [full] | 2681  | No  | NA    | 1  | 0  | Low-quality    | Genome-fragment | NA | 6.05  | 0     |
| S12-final-viral-combined_k141_171737 | [full] | 1257  | No  | NA    | 0  | 0  | Not-determined | Genome-fragment | NA | 0     | 0     |
| S12-final-viral-combined_k141_306306 | [full] | 4311  | No  | NA    | 0  | 1  | Not-determined | Genome-fragment | NA | 0     | 0     |
| S2-final-viral-combined_k141_165479  | [full] | 2682  | No  | NA    | 0  | 0  | Low-quality    | Genome-fragment | NA | 0.92  | 0     |
| S12-final-viral-combined_k141_171745 | [full] | 1234  | No  | NA    | 0  | 0  | Not-determined | Genome-fragment | NA | 0     | 0     |
| S12-final-viral-combined_k141_88074  | [full] | 1358  | No  | NA    | 0  | 0  | Not-determined | Genome-fragment | NA | 0     | 0     |
| S12-final-viral-combined_k141_289738 | [full] | 2354  | No  | NA    | 0  | 2  | Not-determined | Genome-fragment | NA | 0     | 0     |
| S1-final-viral-combined_k141_339182  | [full] | 2682  | No  | NA    | 4  | 0  | Low-quality    | Genome-fragment | NA | 4.08  | 0     |
| S1_k141_227214                       |        | 2682  | No  | NA    | 0  | 1  | Low-quality    | Genome-fragment | NA | 0.96  | 0     |
| S12-final-viral-combined_k141_104736 | [full] | 2750  | No  | NA    | 0  | 1  | Not-determined | Genome-fragment | NA | 0     | 0     |
| S11-final-viral-combined_k141_232505 | [full] | 2683  | No  | NA    | 2  | 0  | Low-quality    | Genome-fragment | NA | 5.71  | 0     |
| S17-final-viral-combined_k141_39717  | [full] | 2683  | No  | NA    | 0  | 0  | Low-quality    | Genome-fragment | NA | 4.43  | 0     |
| S12-final-viral-combined_k141_322747 | [full] | 8044  | No  | NA    | 0  | 1  | Not-determined | Genome-fragment | NA | 0     | 0     |
| S2-final-viral-combined_k141_27222   | [full] | 2683  | No  | NA    | 0  | 0  | Low-quality    | Genome-fragment | NA | 2.8   | 0     |
| S12-final-viral-combined_k141_4539   | [full] | 1226  | No  | NA    | 0  | 0  | Not-determined | Genome-fragment | NA | 0     | 0     |
| S6-final-viral-combined_k141_65998   | [full] | 2683  | Yes | 528   | 1  | 1  | Low-quality    | Genome-fragment | NA | 0.25  | 80.32 |
| S12-final-viral-combined_k141_4542   | [full] | 3931  | No  | NA    | 0  | 1  | Not-determined | Genome-fragment | NA | 0     | 0     |
| S7-final-viral-combined_k141_25023   | [full] | 2684  | No  | NA    | 0  | 0  | Low-quality    | Genome-fragment | NA | 4.48  | 0     |
| S12-final-viral-combined_k141_54658  | [full] | 5244  | No  | NA    | 0  | 3  | Not-determined | Genome-fragment | NA | 0     | 0     |
| S17-k141_111452                      |        | 2684  | No  | NA    | 0  | 0  | Low-quality    | Genome-fragment | NA | 3.74  | 0     |
| S12-final-viral-combined_k141_189248 | [full] | 1214  | No  | NA    | 0  | 0  | Not-determined | Genome-fragment | NA | 0     | 0     |
| S12-final-viral-combined_k141_4544   | [full] | 5080  | No  | NA    | 0  | 4  | Not-determined | Genome-fragment | NA | 0     | 0     |
| S12-final-viral-combined_k141_238870 | [full] | 1363  | No  | NA    | 0  | 1  | Not-determined | Genome-fragment | NA | 0     | 0     |
| S2-final-viral-combined_k141_114768  | [full] | 2684  | No  | NA    | 0  | 0  | Low-quality    | Genome-fragment | NA | 3.46  | 0     |
| S12-final-viral-combined_k141_21317  | [full] | 1617  | No  | NA    | 0  | 3  | Not-determined | Genome-fragment | NA | 0     | 0     |
| S12-final-viral-combined_k141_289462 | [full] | 1487  | No  | NA    | 0  | 1  | Not-determined | Genome-fragment | NA | 0     | 0     |
| S4-final-viral-combined_k141_113621  | [full] | 2684  | No  | NA    | 0  | 0  | Low-quality    | Genome-fragment | NA | 8.21  | 0     |
| S8-final-viral-combined_k141_108888  | [full] | 2684  | No  | NA    | 1  | 0  | Low-quality    | Genome-fragment | NA | 6.64  | 0     |
| S12-final-viral-combined_k141_282793 | [full] | 1457  | No  | NA    | 0  | 0  | Not-determined | Genome-fragment | NA | 0     | 0     |
| S12-final-viral-combined_k141_239793 | [full] | 1217  | No  | NA    | 1  | 1  | Not-determined | Genome-fragment | NA | 0     | 0     |
| S12-final-viral-combined_k141_306437 | [full] | 1474  | No  | NA    | 0  | 1  | Not-determined | Genome-fragment | NA | 0     | 0     |
| S12-final-viral-combined_k141_272428 | [full] | 4641  | No  | NA    | 0  | 3  | Not-determined | Genome-fragment | NA | 0     | 0     |
| S12-final-viral-combined_k141_289529 | [full] | 2618  | No  | NA    | 0  | 3  | Not-determined | Genome-fragment | NA | 0     | 0     |
| S11-final-viral-combined_k141_19588  | [full] | 2685  | No  | NA    | 0  | 0  | Low-quality    | Genome-fragment | NA | 5.6   | 0     |
| S11_k141_11422                       |        | 2685  | No  | NA    | 0  | 2  | Low-quality    | Genome-fragment | NA | 1.08  | 0     |
| S12-final-viral-combined_k141_225885 | [full] | 2685  | No  | NA    | 0  | 2  | Low-quality    | Genome-fragment | NA | 6.07  | 0     |
| S11-final-viral-combined_k141_262750 | [full] | 2686  | No  | NA    | 0  | 0  | Low-quality    | Genome-fragment | NA | 2.95  | 0     |
| S12-final-viral-combined_k141_121243 | [full] | 2512  | No  | NA    | 0  | 1  | Not-determined | Genome-fragment | NA | 0     | 0     |
| S12-final-viral-combined_k141_355701 | [full] | 1546  | No  | NA    | 0  | 2  | Not-determined | Genome-fragment | NA | 0     | 0     |
| S1-final-viral-combined_k141_299265  | [full] | 2687  | No  | NA    | 0  | 1  | Low-quality    | Genome-fragment | NA | 2.83  | 0     |
| S1-final-viral-combined_k141_334611  | [full] | 2687  | No  | NA    | 1  | 0  | Low-quality    | Genome-fragment | NA | 2.89  | 0     |
| S7-final-viral-combined_k141_207855  | [full] | 2687  | No  | NA    | 0  | 0  | Low-quality    | Genome-fragment | NA | 4.82  | 0     |
| S12-final-viral-combined_k141_155210 | [full] | 1612  | No  | NA    | 0  | 0  | Not-determined | Genome-fragment | NA | 0     | 0     |
| S7_k141_133687                       |        | 2687  | No  | NA    | 1  | 0  | Low-quality    | Genome-fragment | NA | 11.43 | 0     |
| S12-final-viral-combined_k141_30363  | [full] | 2687  | No  | NA    | 3  | 0  | Low-quality    | Genome-fragment | NA | 4.57  | 0     |
| S12-final-viral-combined_k141_155236 | [full] | 3417  | No  | NA    | 0  | 2  | Not-determined | Genome-fragment | NA | 0     | 0     |
| S12-final-viral-combined_k141_289404 | [full] | 1061  | No  | NA    | 0  | 2  | Not-determined | Genome-fragment | NA | 0     | 0     |
| S12-final-viral-combined_k141_173915 | [full] | 1383  | No  | NA    | 0  | 2  | Not-determined | Genome-fragment | NA | 0     | 0     |
| S12-final-viral-combined_k141_62433  | [full] | 2687  | No  | NA    | 0  | 1  | Low-quality    | Genome-fragment | NA | 3.08  | 0     |
| S4-final-viral-combined_k141_21695   | [full] | 2687  | No  | NA    | 0  | 2  | Low-quality    | Genome-fragment | NA | 1.25  | 0     |
| S12-final-viral-combined_k141_322886 | [full] | 1515  | No  | NA    | 0  | 0  | Not-determined | Genome-fragment | NA | 0     | 0     |
| S12-final-viral-combined_k141_189323 | [full] | 83620 | Yes | 38428 | 9  | 26 | Medium-quality | Genome-fragment | NA | 89.72 | 54.04 |
| S8-final-viral-combined_k141_137478  | [full] | 2687  | No  | NA    | 0  | 0  | Low-quality    | Genome-fragment | NA | 4.74  | 0     |
| S11-final-viral-combined_k141_31881  | [full] | 2688  | No  | NA    | 2  | 0  | Low-quality    | Genome-fragment | NA | 5.74  | 0     |
| S12-final-viral-combined_k141_339179 | [full] | 1160  | No  | NA    | 0  | 2  | Not-determined | Genome-fragment | NA | 0     | 0     |
| S12-final-viral-combined_k141_189357 | [full] | 2605  | No  | NA    | 0  | 1  | Not-determined | Genome-fragment | NA | 0     | 0     |
| S3-final-viral-combined_k141_61151   | [full] | 2688  | No  | NA    | 0  | 0  | Low-quality    | Genome-fragment | NA | 4.6   | 0     |
| S12-final-viral-combined_k141_38376  | [full] | 5224  | No  | NA    | 0  | 1  | Not-determined | Genome-fragment | NA | 0     | 0     |
| S12-final-viral-combined_k141_272528 | [full] | 2063  | No  | NA    | 0  | 2  | Not-determined | Genome-fragment | NA | 0     | 0     |
| S12-final-viral-combined_k141_25327  | [full] | 7415  | No  | NA    | 0  | 4  | Not-determined | Genome-fragment | NA | 0     | 0     |
| S12-final-viral-combined_k141_389771 | [full] | 1560  | No  | NA    | 0  | 1  | Not-determined | Genome-fragment | NA | 0     | 0     |
| S12-final-viral-combined_k141_373375 | [full] | 1179  | No  | NA    | 0  | 0  | Not-determined | Genome-fragment | NA | 0     | 0     |
| S12-final-viral-combined_k141_105874 | [full] | 2096  | No  | NA    | 0  | 1  | Not-determined | Genome-fragment | NA | 0     | 0     |
| S17-final-viral-combined_k141_122764 | [full] | 2689  | No  | NA    | 1  | 0  | Low-quality    | Genome-fragment | NA | 1.63  | 0     |
| S9-final-viral-combined_k141_45840   | [full] | 2690  | No  | NA    | 0  | 2  | Low-quality    | Genome-fragment | NA | 1.08  | 0     |
| S12-final-viral-combined_k141_105041 | [full] | 1603  | No  | NA    | 0  | 1  | Not-determined | Genome-fragment | NA | 0     | 0     |
| S1_k141_30231                        |        | 2690  | No  | NA    | 1  | 0  | Low-quality    | Genome-fragment | NA | 5.96  | 0     |
| S17-final-viral-combined_k141_201203 | [full] | 2690  | No  | NA    | 0  | 0  | Low-quality    | Genome-fragment | NA | 6.56  | 0     |
| S12-final-viral-combined_k141_373418 | [full] | 4225  | No  | NA    | 0  | 4  | Not-determined | Genome-fragment | NA | 0     | 0     |
| S8-final-viral-combined_k141_202073  | [full] | 2690  | No  | NA    | 1  | 0  | Low-quality    | Genome-fragment | NA | 3.97  | 0     |
| S8-final-viral-combined_k141_169312  | [full] | 2690  | No  | NA    | 1  | 0  | Low-quality    | Genome-fragment | NA | 5.59  | 0     |
| S12-final-viral-combined_k141_38465  | [full] | 2691  | No  | NA    | 0  | 0  | Low-quality    | Genome-fragment | NA | 2.48  | 0     |
| S12-final-viral-combined_k141_38465  | [full] | 4024  | No  | NA    | 0  | 4  | Not-determined | Genome-fragment | NA | 0     | 0     |
| S3-final-viral-combined_k141_136284  | [full] | 2691  | No  | NA    | 0  | 2  | Low-quality    | Genome-fragment | NA | 2.02  | 0     |
| S12-final-viral-combined_k141_155385 | [full] | 3660  | No  | NA    | 0  | 3  | Not-determined | Genome-fragment | NA | 0     | 0     |
| S12-final-viral-combined_k141_24735  | [full] | 1203  | No  | NA    | 0  | 0  | Not-determined | Genome-fragment | NA | 0     | 0     |
| S12-final-viral-combined_k141_38881  | [full] | 2123  | No  | NA    | 0  | 2  | Not-determined | Genome-fragment | NA | 0     | 0     |
| S12-final-viral-combined_k141_33557  | [full] | 2691  | No  | NA    | 0  | 2  | Low-quality    | Genome-fragment | NA | 1.86  | 0     |
| S12-final-viral-combined_k141_105111 | [full] | 5906  | No  | NA    | 0  | 5  | Not-determined | Genome-fragment | NA | 0     | 0     |
| S2-final-viral-combined_k141_184203  | [full] | 2691  | No  | NA    | 0  | 1  | Low-quality    | Genome-fragment | NA | 5.98  | 0     |
| S12-final-viral-combined_k141_72256  | [full] | 1523  | No  | NA    | 0  | 2  | Not-determined | Genome-fragment | NA | 0     | 0     |
| S12-final-viral-combined_k141_105165 | [full] | 1052  | No  | NA    | 0  | 0  | Not-determined | Genome-fragment | NA | 0     | 0     |
| S12-final-viral-combined_k141_38986  | [full] | 1595  | No  | NA    | 0  | 2  | Not-determined | Genome-fragment | NA | 0     | 0     |
| S12-final-viral-combined_k141_21504  | [full] | 37101 | No  | NA    | 16 | 1  | Medium-quality | Genome-fragment | NA | 73.46 | 0     |
| S11-final-viral-combined_k141_92821  | [full] | 2692  | No  | NA    | 2  | 0  | Low-quality    | Genome-fragment | NA | 1.95  | 0     |
| S12-final-viral-combined_k141_21506  | [full] | 1058  | No  | NA    | 0  | 0  | Not-determined | Genome-fragment | NA | 0     | 0     |
| S1-final-viral-combined_k141_327776  | [full] | 2692  | No  | NA    | 0  | 0  | Low-quality    | Genome-fragment | NA | 7.23  | 0     |
| S12-final-viral-combined_k141_34471  | [full] | 2692  | No  | NA    | 0  | 0  | Low-quality    | Genome-fragment | NA | 3.55  | 0     |
| S12-final-viral-combined_k141_323100 | [full] | 2149  | No  | NA    | 0  | 2  | Not-determined | Genome-fragment | NA | 0     | 0     |
| S12-final-viral-combined_k141_88566  | [full] | 2213  | No  | NA    | 0  | 2  | Not-determined | Genome-fragment | NA | 0     | 0     |
| S8-final-viral-combined_k141_260529  | [full] | 2692  | No  | NA    | 0  | 3  | Low-quality    | Genome-fragment | NA | 1.03  | 0     |
| S12-final-viral-combined_k141_339379 | [full] | 2583  | No  | NA    | 0  | 1  | Not-determined | Genome-fragment | NA | 0     | 0     |
| S1-final-viral-combined_k141_17306   | [full] | 2693  | No  | NA    | 0  | 0  | Low-quality    | Genome-fragment | NA | 6.25  | 0     |
| S12-final-viral-combined_k141_306622 | [full] | 2144  | No  | NA    | 0  | 1  | Not-determined | Genome-fragment | NA | 0     | 0     |
| S9-final-viral-combined_k141_51366   | [full] | 2694  | No  | NA    | 0  | 0  | Low-quality    | Genome-fragment | NA | 5.46  | 0     |
| S12-final-viral-combined_k141_323121 | [full] | 1187  | No  | NA    | 0  | 0  | Not-determined | Genome-fragment | NA | 0     | 0     |
| S12-final-viral-combined_k141_301869 | [full] | 2694  | No  | NA    | 0  | 0  | Low-quality    | Genome-fragment | NA | 4.25  | 0     |
| S4-final-viral-combined_k141_20923   | [full] | 2694  | No  | NA    | 0  | 1  | Low-quality    | Genome-fragment | NA | 5.1   | 0     |
| S12-final-viral-combined_k141_155504 | [full] | 1679  | No  | NA    | 0  | 2  | Not-determined | Genome-fragment | NA | 1.18  | 0     |
| S11-final-viral-combined_k141_251743 | [full] | 2695  | No  | NA    | 0  | 0  | Low-quality    | Genome-fragment | NA | 0     | 0     |
| S11-final-viral-combined_k141_61507  | [full] | 2695  | No  | NA    | 0  | 0  | Low-quality    | Genome-fragment | NA | 5.75  | 0     |
| S12-final-viral-combined_k141_189593 | [full] | 1206  | No  | NA    | 0  | 1  | Not-determined | Genome-fragment | NA | 0     | 0     |
| S7-final-viral-combined_k141_141218  | [full] | 2695  | No  | NA    | 0  | 0  | Low-quality    | Genome-fragment | NA | 6.36  | 0     |
| S12-final-viral-combined_k141_35140  | [full] | 2695  | No  | NA    | 0  | 1  | Low-quality    | Genome-fragment | NA | 1.59  | 0     |
| S12-final-viral-combined_k141_88330  | [full] | 1532  | No  | NA    | 0  | 2  | Not-determined | Genome-fragment | NA | 0     | 0     |
| S12-final-viral-combined_k141_38939  | [full] | 8813  | No  | NA    | 0  | 4  | Not-determined | Genome-fragment | NA | 0     | 0     |
| S12-final-viral-combined_k141_339434 | [full] | 3067  | No  | NA    | 0  | 3  | Not-determined | Genome-fragment | NA | 0     | 0     |
| S8-final-viral-combined_k141_43407   | [full] | 2695  | No  | NA    | 0  | 2  | Low-quality    | Genome-fragment | NA | 2.19  | 0     |
| S12-final-viral-combined_k141_355926 | [full] | 2807  | No  | NA    | 0  | 1  | Not-determined | Genome-fragment | NA | 0     | 0     |
| S12-final                            |        |       |     |       |    |    |                |                 |    |       |       |



|                                       |            |       |     |    |       |    |                |                 |                 |       |       |
|---------------------------------------|------------|-------|-----|----|-------|----|----------------|-----------------|-----------------|-------|-------|
| S12-final-viral-combined_k141_3070051 | [full]     | 7489  | No  | NA | 0     | 2  | Not-determined | Genome-fragment | NA              | 2.55  | 0     |
| S11-final-viral-combined_k141_102721  | [full]     | 2704  | No  | NA | 0     | 1  | Low-quality    | Genome-fragment | NA              | 0     | 0     |
| S12-final-viral-combined_k141_121534  | [full]     | 1538  | No  | NA | 0     | 0  | Not-determined | Genome-fragment | NA              | 0     | 0     |
| S12-final-viral-combined_k141_272973  | [full]     | 3175  | No  | NA | 0     | 0  | Not-determined | Genome-fragment | NA              | 0     | 0     |
| S1-final-viral-combined_k141_37137    | [full]     | 2704  | No  | NA | 1     | 0  | Low-quality    | Genome-fragment | NA              | 7.48  | 0     |
| S12-final-viral-combined_k141_5012    | [full]     | 2219  | No  | NA | 0     | 1  | Not-determined | Genome-fragment | NA              | 0     | 0     |
| S5-final-viral-combined_k141_125894   | [H2genome] | 2704  | No  | NA | 1     | 0  | Low-quality    | Genome-fragment | NA              | 4.27  | 0     |
| S7-final-viral-combined_k141_102840   | [full]     | 2704  | No  | NA | 0     | 1  | Low-quality    | Genome-fragment | NA              | 1.65  | 0     |
| S12-final-viral-combined_k141_121550  | [full]     | 1650  | No  | NA | 0     | 1  | Not-determined | Genome-fragment | NA              | 6.12  | 0     |
| S12-final-viral-combined_k141_273000  | [full]     | 1422  | No  | NA | 0     | 2  | Not-determined | Genome-fragment | NA              | 0     | 0     |
| S12-final-viral-combined_k141_190848  | [full]     | 2704  | No  | NA | 0     | 2  | Low-quality    | Genome-fragment | NA              | 1.95  | 0     |
| S12-final-viral-combined_k141_121567  | [full]     | 1268  | No  | NA | 0     | 0  | Not-determined | Genome-fragment | NA              | 0     | 0     |
| S12-final-viral-combined_k141_222556  | [full]     | 1968  | No  | NA | 0     | 0  | Not-determined | Genome-fragment | NA              | 0     | 0     |
| S12-final-viral-combined_k141_38969   | [full]     | 12127 | No  | NA | 0     | 11 | Not-determined | Genome-fragment | NA              | 0     | 0     |
| S2-final-viral-combined_k141_105492   | [full]     | 2704  | No  | NA | 0     | 2  | Low-quality    | Genome-fragment | NA              | 1.66  | 0     |
| S9-final-viral-combined_k141_396191   | [full]     | 2705  | No  | NA | 0     | 0  | Low-quality    | Genome-fragment | NA              | 2.01  | 0     |
| S9_k141_54246                         |            | 2705  | No  | NA | 0     | 1  | Low-quality    | Genome-fragment | NA              | 1.66  | 0     |
| S11-final-viral-combined_k141_246629  | [full]     | 2705  | No  | NA | 1     | 0  | Low-quality    | Genome-fragment | NA              | 4.75  | 0     |
| S11-final-viral-combined_k141_220464  | [full]     | 2705  | No  | NA | 0     | 0  | Low-quality    | Genome-fragment | NA              | 6.12  | 0     |
| S17-final-viral-combined_k141_239963  | [full]     | 2705  | No  | NA | 0     | 1  | Low-quality    | Genome-fragment | NA              | 1.31  | 0     |
| S12-final-viral-combined_k141_222572  | [full]     | 1211  | No  | NA | 0     | 1  | Not-determined | Genome-fragment | NA              | 0     | 0     |
| S12-final-viral-combined_k141_273041  | [full]     | 2421  | No  | NA | 0     | 0  | Not-determined | Genome-fragment | NA              | 0     | 0     |
| S5-final-viral-combined_k141_34509    | [full]     | 2706  | No  | NA | 1     | 0  | Low-quality    | Genome-fragment | NA              | 5.79  | 0     |
| S12-final-viral-combined_k141_290124  | [full]     | 2714  | No  | NA | 0     | 2  | Not-determined | Genome-fragment | NA              | 0     | 0     |
| S17_k141_246698                       |            | 2706  | No  | NA | 0     | 2  | Low-quality    | Genome-fragment | NA              | 0.23  | 0     |
| S2-final-viral-combined_k141_49817    | [full]     | 2706  | No  | NA | 0     | 1  | Low-quality    | Genome-fragment | NA              | 6.15  | 0     |
| S12-final-viral-combined_k141_239433  | [full]     | 1467  | No  | NA | 0     | 2  | Not-determined | Genome-fragment | NA              | 0     | 0     |
| S9-final-viral-combined_k141_104070   | [full]     | 2707  | No  | NA | 0     | 0  | Low-quality    | Genome-fragment | NA              | 21.33 | 0     |
| S12-final-viral-combined_k141_297379  | [full]     | 2707  | No  | NA | 0     | 0  | Low-quality    | Genome-fragment | NA              | 1.59  | 0     |
| S12-final-viral-combined_k141_390399  | [full]     | 6742  | No  | NA | 0     | 3  | Not-determined | Genome-fragment | NA              | 0     | 0     |
| S12-final-viral-combined_k141_139209  | [full]     | 1103  | No  | NA | 0     | 1  | Not-determined | Genome-fragment | NA              | 0     | 0     |
| S2-final-viral-combined_k141_238751   | [full]     | 2707  | No  | NA | 0     | 0  | Low-quality    | Genome-fragment | NA              | 5.13  | 0     |
| S12-final-viral-combined_k141_105477  | [full]     | 1829  | No  | NA | 0     | 1  | Not-determined | Genome-fragment | NA              | 0     | 0     |
| S12-final-viral-combined_k141_21957   | [full]     | 3859  | No  | NA | 0     | 1  | Not-determined | Genome-fragment | NA              | 0     | 0     |
| S12-final-viral-combined_k141_336979  | [full]     | 5488  | No  | NA | 0     | 1  | Not-determined | Genome-fragment | NA              | 0     | 0     |
| S12-final-viral-combined_k141_139248  | [full]     | 2413  | No  | NA | 0     | 1  | Not-determined | Genome-fragment | NA              | 0     | 0     |
| S12-final-viral-combined_k141_105523  | [full]     | 1275  | No  | NA | 0     | 0  | Not-determined | Genome-fragment | NA              | 0     | 0     |
| S12-final-viral-combined_k141_190866  | [full]     | 6745  | No  | NA | 0     | 2  | Not-determined | Genome-fragment | NA              | 0     | 0     |
| S12-final-viral-combined_k141_5002    | [full]     | 4753  | No  | NA | 0     | 0  | Not-determined | Genome-fragment | NA              | 0     | 0     |
| S12-final-viral-combined_k141_290193  | [full]     | 3373  | No  | NA | 0     | 2  | Not-determined | Genome-fragment | NA              | 0     | 0     |
| S12-final-viral-combined_k141_390469  | [full]     | 5215  | No  | NA | 0     | 4  | Not-determined | Genome-fragment | NA              | 0     | 0     |
| S12-final-viral-combined_k141_39087   | [full]     | 3027  | No  | NA | 0     | 3  | Not-determined | Genome-fragment | NA              | 0     | 0     |
| S2-final-viral-combined_k141_210869   | [full]     | 2707  | No  | NA | 1     | 0  | Low-quality    | Genome-fragment | NA              | 5.15  | 0     |
| S9-final-viral-combined_k141_72677    | [full]     | 2708  | No  | NA | 1     | 0  | Low-quality    | Genome-fragment | NA              | 6.95  | 0     |
| S1-final-viral-combined_k141_135632   | [full]     | 2708  | No  | NA | 0     | 1  | Low-quality    | Genome-fragment | NA              | 1.24  | 0     |
| S12-final-viral-combined_k141_371835  | [full]     | 3512  | No  | NA | 0     | 1  | Not-determined | Genome-fragment | NA              | 0     | 0     |
| S12-final-viral-combined_k141_105568  | [full]     | 1358  | No  | NA | 0     | 1  | Not-determined | Genome-fragment | NA              | 0     | 0     |
| S12-final-viral-combined_k141_339732  | [full]     | 8879  | No  | NA | 0     | 6  | Not-determined | Genome-fragment | NA              | 0     | 0     |
| S12-final-viral-combined_k141_350666  | [full]     | 1053  | No  | NA | 0     | 1  | Not-determined | Genome-fragment | NA              | 0     | 0     |
| S7-final-viral-combined_k141_303077   | [full]     | 2708  | No  | NA | 1     | 0  | Low-quality    | Genome-fragment | NA              | 5.16  | 0     |
| S17-final-viral-combined_k141_85689   | [full]     | 2708  | No  | NA | 1     | 0  | Low-quality    | Genome-fragment | NA              | 1.52  | 0     |
| S12-final-viral-combined_k141_72936   | [full]     | 2517  | No  | NA | 0     | 0  | Not-determined | Genome-fragment | NA              | 0     | 0     |
| S12-final-viral-combined_k141_39098   | [full]     | 4668  | No  | NA | 0     | 0  | Not-determined | Genome-fragment | NA              | 0     | 0     |
| S8-final-viral-combined_k141_175441   | [full]     | 2708  | No  | NA | 1     | 0  | Low-quality    | Genome-fragment | NA              | 3.04  | 0     |
| S5-final-viral-combined_k141_119074   | [full]     | 2709  | No  | NA | 0     | 1  | Low-quality    | Genome-fragment | NA              | 7.68  | 0     |
| S12-final-viral-combined_k141_190114  | [full]     | 30285 | No  | NA | 6     | 0  | Medium-quality | Genome-fragment | NA              | 53.01 | 0     |
| S9-final-viral-combined_k141_47218    | [full]     | 2710  | No  | NA | 2     | 0  | Low-quality    | Genome-fragment | NA              | 7.9   | 0     |
| S12-final-viral-combined_k141_256135  | [full]     | 5530  | No  | NA | 0     | 1  | Not-determined | Genome-fragment | NA              | 0     | 0     |
| S12-final-viral-combined_k141_172574  | [full]     | 1917  | No  | NA | 0     | 1  | Not-determined | Genome-fragment | NA              | 0     | 0     |
| S3-final-viral-combined_k141_37871    | [full]     | 2710  | No  | NA | 0     | 3  | Low-quality    | Genome-fragment | NA              | 4.07  | 0     |
| S11-final-viral-combined_k141_145336  | [full]     | 2711  | No  | NA | 0     | 0  | Low-quality    | Genome-fragment | NA              | 4.21  | 0     |
| S12-final-viral-combined_k141_239626  | [full]     | 1715  | No  | NA | 0     | 2  | Not-determined | Genome-fragment | NA              | 0     | 0     |
| S12-final-viral-combined_k141_307314  | [full]     | 1886  | No  | NA | 0     | 0  | Not-determined | Genome-fragment | NA              | 0     | 0     |
| S12-final-viral-combined_k141_307331  | [full]     | 1078  | No  | NA | 0     | 0  | Not-determined | Genome-fragment | NA              | 0     | 0     |
| S12-final-viral-combined_k141_220874  | [full]     | 1890  | No  | NA | 0     | 2  | Not-determined | Genome-fragment | NA              | 5.89  | 0     |
| S12-final-viral-combined_k141_390566  | [full]     | 3910  | No  | NA | 0     | 0  | Not-determined | Genome-fragment | NA              | 0     | 0     |
| S17-final-viral-combined_k141_38219   | [full]     | 2712  | No  | NA | 0     | 1  | Low-quality    | Genome-fragment | NA              | 0.7   | 0     |
| S9-final-viral-combined_k141_113629   | [full]     | 2713  | No  | NA | 0     | 1  | Low-quality    | Genome-fragment | NA              | 4.21  | 0     |
| S12-final-viral-combined_k141_156057  | [full]     | 6319  | No  | NA | 0     | 1  | Not-determined | Genome-fragment | NA              | 0     | 0     |
| S12-final-viral-combined_k141_139293  | [full]     | 2045  | No  | NA | 0     | 3  | Not-determined | Genome-fragment | NA              | 0     | 0     |
| S1-final-viral-combined_k141_399      | [full]     | 2713  | No  | NA | 0     | 2  | Low-quality    | Genome-fragment | NA              | 1.89  | 0     |
| S8-final-viral-combined_k141_187402   | [full]     | 2713  | No  | NA | 0     | 0  | Low-quality    | Genome-fragment | NA              | 2.54  | 0     |
| S5-final-viral-combined_k141_48601    | [full]     | 2714  | No  | NA | 2     | 0  | Low-quality    | Genome-fragment | NA              | 7.18  | 0     |
| S12-final-viral-combined_k141_139315  | [full]     | 1403  | No  | NA | 0     | 0  | Not-determined | Genome-fragment | NA              | 0     | 0     |
| S12-final-viral-combined_k141_272323  | [full]     | 9404  | No  | NA | 0     | 4  | Not-determined | Genome-fragment | NA              | 0     | 0     |
| S12-final-viral-combined_k141_222784  | [full]     | 1837  | No  | NA | 0     | 0  | Not-determined | Genome-fragment | NA              | 0     | 0     |
| S12-final-viral-combined_k141_239681  | [full]     | 1253  | No  | NA | 0     | 0  | Not-determined | Genome-fragment | NA              | 0     | 0     |
| S7-final-viral-combined_k141_123991   | [full]     | 2714  | No  | NA | 0     | 1  | Low-quality    | Genome-fragment | NA              | 4.72  | 0     |
| S12-final-viral-combined_k141_221341  | [full]     | 7666  | No  | NA | 0     | 2  | Not-determined | Genome-fragment | NA              | 0     | 0     |
| S17-final-viral-combined_k141_216359  | [full]     | 2714  | No  | NA | 0     | 0  | Low-quality    | Genome-fragment | NA              | 5.69  | 0     |
| S1-final-viral-combined_k141_123279   | [full]     | 2715  | No  | NA | 0     | 1  | Low-quality    | Genome-fragment | NA              | 2.83  | 0     |
| S8_k141_222340                        |            | 2715  | No  | NA | 0     | 0  | Low-quality    | Genome-fragment | NA              | 1.97  | 0     |
| S11-final-viral-combined_k141_52442   | [full]     | 2716  | No  | NA | 0     | 1  | Low-quality    | Genome-fragment | NA              | 0.86  | 0     |
| S1-final-viral-combined_k141_33725    | [full]     | 2716  | No  | NA | 2     | 0  | Low-quality    | Genome-fragment | NA              | 6.45  | 0     |
| S1-final-viral-combined_k141_148469   | [full]     | 2716  | No  | NA | 0     | 1  | Low-quality    | Genome-fragment | NA              | 4.13  | 0     |
| S3-final-viral-combined_k141_112081   | [full]     | 2716  | No  | NA | 1     | 0  | Low-quality    | Genome-fragment | NA              | 4.71  | 0     |
| S12-final-viral-combined_k141_39106   | [full]     | 6621  | No  | NA | 0     | 0  | Not-determined | Genome-fragment | NA              | 5.7   | 0     |
| S7-final-viral-combined_k141_87706    | [full]     | 2716  | No  | NA | 2     | 0  | Low-quality    | Genome-fragment | NA              | 5.7   | 0     |
| S12-final-viral-combined_k141_74741   | [full]     | 2716  | No  | NA | 0     | 1  | Low-quality    | Genome-fragment | NA              | 1.79  | 0     |
| S12-final-viral-combined_k141_55124   | [full]     | 2045  | No  | NA | 0     | 0  | Not-determined | Genome-fragment | NA              | 0     | 0     |
| S2-final-viral-combined_k141_245876   | [full]     | 2716  | No  | NA | 0     | 1  | Low-quality    | Genome-fragment | NA              | 1.06  | 0     |
| S1-final-viral-combined_k141_187402   | [full]     | 2717  | No  | NA | 0     | 0  | Low-quality    | Genome-fragment | NA              | 5.89  | 0     |
| S5_k141_89982                         |            | 2717  | No  | NA | 0     | 0  | Low-quality    | Genome-fragment | NA              | 3.51  | 0     |
| S12-final-viral-combined_k141_256298  | [full]     | 7822  | No  | NA | 0     | 1  | Not-determined | Genome-fragment | NA              | 0     | 0     |
| S12-final-viral-combined_k141_232762  | [full]     | 1362  | No  | NA | 0     | 0  | Not-determined | Genome-fragment | NA              | 0     | 0     |
| S12-final-viral-combined_k141_205979  | [full]     | 2940  | No  | NA | 0     | 3  | Not-determined | Genome-fragment | NA              | 0     | 0     |
| S12-final-viral-combined_k141_307478  | [full]     | 4477  | No  | NA | 0     | 3  | Not-determined | Genome-fragment | NA              | 0     | 0     |
| S12-final-viral-combined_k141_121944  | [full]     | 1730  | No  | NA | 0     | 1  | Not-determined | Genome-fragment | NA              | 0     | 0     |
| S2-final-viral-combined_k141_108174   | [full]     | 2717  | No  | NA | 0     | 0  | Low-quality    | Genome-fragment | NA              | 7.79  | 0     |
| S4_k141_128331                        |            | 2717  | No  | NA | 0     | 0  | Low-quality    | Genome-fragment | NA              | 2.85  | 0     |
| S12-final-viral-combined_k141_256299  | [full]     | 5341  | Yes | NA | 46763 | 12 | 4              | Medium-quality  | Genome-fragment | NA    | 12.45 |
| S12-final-viral-combined_k141_121965  | [full]     | 2277  | No  | NA | 0     | 0  | Not-determined | Genome-fragment | NA              | 0     | 0     |
| S12-final-viral-combined_k141_190314  | [full]     | 2267  | No  | NA | 0     | 3  | Not-determined | Genome-fragment | NA              | 0     | 0     |
| S12-final-viral-combined_k141_39231   | [full]     | 1414  | No  | NA | 0     | 0  | Not-determined | Genome-fragment | NA              | 0     | 0     |
| S12-final-viral-combined_k141_156347  | [full]     | 46318 | Yes | NA | 30049 | 18 | 34             | Medium-quality  | Genome-fragment | NA    | 52.44 |
| S11-final-viral-combined_k141_181225  | [full]     | 2718  | No  | NA | 0     | 0  | Low-quality    | Genome-fragment | NA              | 4.59  | 0     |
| S12-final-viral-combined_k141_155200  | [full]     | 1581  | No  | NA | 0     | 0  | Not-determined | Genome-fragment | NA              | 0     | 0     |
| S12-final-viral-combined_k141_121995  | [full]     | 1822  | No  | NA | 0     | 1  | Not-determined | Genome-fragment | NA              | 0     | 0     |
| S12-final-viral-combined_k141_301330  | [full]     | 2718  | No  | NA | 0     | 1  | Low-quality    | Genome-fragment | NA              | 4.78  | 0     |
| S12-final-viral-combined_k141_307532  | [full]     | 4428  | No  | NA | 0     | 3  | Not-determined | Genome-fragment | NA              | 0     | 0     |
| S12-final-viral-combined_k141_190370  | [full]     | 1150  | No  | NA | 0     | 1  | Not-determined | Genome-fragment | NA              | 0     | 0     |
| S12-final-viral-combined_k141_221043  | [full]     | 20174 | No  | NA | 10    | 1  | Medium-quality | Genome-fragment | NA              | 56.36 | 0     |
| S12-final-viral-combined_k141_239853  | [full]     | 2987  | No  | NA | 0     | 3  | Not-determined | Genome-fragment | NA              | 0     | 0     |
| S12-final-viral-combined_k141_5272    | [full]     | 1880  | No  | NA | 0     | 2  | Not-determined | Genome-fragment | NA              | 0     | 0     |
| S12-final-viral-combined_k141_55258   | [full]     | 2120  | No  | NA | 0     | 0  | Not-determined | Genome-fragment | NA              | 0     | 0     |
| S2-final-viral-combined_k141_178300   | [full]     | 2718  | No  | NA | 2     | 0  | Low-quality    | Genome-fragment | NA              | 5.56  | 0     |
| S12-final-viral-combined_k141_239888  | [full]     | 2695  | No  | NA | 0     | 0  | Not-determined | Genome-fragment | NA              | 0     | 0     |
| S12-final-viral-combined_k141_5274    | [full]     | 20098 | No  | NA | 0     | 3  | Not-determined | Genome-fragment | NA              | 0     | 0     |
| S2-final-viral-combined_k141_172596   | [full]     | 2718  | No  | NA | 0     | 1  | Low-quality    | Genome-fragment | NA              | 6.94  | 0     |
| S12-final-viral-combined_k141_356239  | [full]     | 8702  | No  | NA | 0     | 2  | Not-determined | Genome-fragment | NA              | 0     | 0     |
| S12-final-viral-combined_k141_374031  | [full]     | 1080  | No  | NA | 0     | 0  | Not-determined | Genome-fragment |                 |       |       |



|                                      |             |       |     |      |    |   |                |                 |       |       |
|--------------------------------------|-------------|-------|-----|------|----|---|----------------|-----------------|-------|-------|
| S12-final-viral-combined_k141_240201 | [full]      | 1819  | No  | NA   | 0  | 0 | Not-determined | Genome-fragment | NA    | 0     |
| S12-final-viral-combined_k141_256461 | [full]      | 18975 | No  | NA   | 0  | 0 | Not-determined | Genome-fragment | NA    | 0     |
| S12-final-viral-combined_k141_223202 | [full]      | 2228  | No  | NA   | 0  | 0 | Not-determined | Genome-fragment | NA    | 0     |
| S11-final-viral-combined_k141_218827 | [full]      | 2727  | No  | NA   | 0  | 1 | Low-quality    | Genome-fragment | 2.01  | 0     |
| S7-final-viral-combined_k141_17171   | [full]      | 2727  | No  | NA   | 0  | 0 | Low-quality    | Genome-fragment | 4.27  | 0     |
| S12-final-viral-combined_k141_35571  | [full]      | 1884  | No  | NA   | 0  | 1 | Not-determined | Genome-fragment | NA    | 0     |
| S12-final-viral-combined_k141_89417  | [full]      | 1561  | No  | NA   | 0  | 1 | Not-determined | Genome-fragment | NA    | 0     |
| S12-final-viral-combined_k141_324087 | [full]      | 1267  | No  | NA   | 0  | 1 | Not-determined | Genome-fragment | NA    | 0     |
| S12-final-viral-combined_k141_37477  | [full]      | 1197  | No  | NA   | 0  | 0 | Not-determined | Genome-fragment | NA    | 0     |
| S17-final-viral-combined_k141_158427 | [full]      | 2727  | No  | NA   | 0  | 2 | Low-quality    | Genome-fragment | 5.06  | 0     |
| S12-final-viral-combined_k141_290988 | [full]      | 3097  | No  | NA   | 0  | 2 | Not-determined | Genome-fragment | NA    | 0     |
| S1_k141_130051                       | [full]      | 2728  | No  | NA   | 2  | 0 | Low-quality    | Genome-fragment | 6.17  | 0     |
| S12-final-viral-combined_k141_126808 | [full]      | 2728  | No  | NA   | 1  | 0 | Low-quality    | Genome-fragment | 1.28  | 0     |
| S8-final-viral-combined_k141_117021  | [full]      | 2728  | No  | NA   | 0  | 0 | Low-quality    | Genome-fragment | 8.48  | 0     |
| S7-final-viral-combined_k141_129311  | [full]      | 2729  | No  | NA   | 0  | 0 | Low-quality    | Genome-fragment | 5.99  | 0     |
| S12-final-viral-combined_k141_35631  | [full]      | 2381  | No  | NA   | 0  | 2 | Not-determined | Genome-fragment | NA    | 0     |
| S4-final-viral-combined_k141_118833  | [full]      | 2729  | No  | NA   | 0  | 0 | Low-quality    | Genome-fragment | 4.31  | 0     |
| S12-final-viral-combined_k141_374395 | [full]      | 2730  | No  | NA   | 1  | 0 | Low-quality    | Genome-fragment | 8.2   | 0     |
| S8-final-viral-combined_k141_120071  | [full]      | 2731  | No  | NA   | 1  | 0 | Low-quality    | Genome-fragment | 46.34 | 0     |
| S5-final-viral-combined_k141_178670  | [full]      | 2732  | No  | NA   | 0  | 0 | Low-quality    | Genome-fragment | 4.53  | 0     |
| S12-final-viral-combined_k141_307909 | [full]      | 1097  | No  | NA   | 0  | 2 | Not-determined | Genome-fragment | NA    | 0     |
| S12-final-viral-combined_k141_374332 | [full]      | 1345  | No  | NA   | 0  | 2 | Not-determined | Genome-fragment | NA    | 0     |
| S7-final-viral-combined_k141_61397   | [full]      | 2732  | No  | NA   | 0  | 0 | Low-quality    | Genome-fragment | 4.85  | 0     |
| S2-final-viral-combined_k141_18817   | [0_partial] | 2732  | Yes | 1435 | 1  | 1 | Low-quality    | Genome-fragment | 34.48 | 47.47 |
| S12-final-viral-combined_k141_240290 | [full]      | 1664  | No  | NA   | 0  | 0 | Not-determined | Genome-fragment | NA    | 0     |
| S1-final-viral-combined_k141_19241   | [full]      | 2733  | No  | NA   | 1  | 0 | Low-quality    | Genome-fragment | 6.17  | 0     |
| S12-final-viral-combined_k141_307922 | [full]      | 1046  | No  | NA   | 0  | 0 | Not-determined | Genome-fragment | NA    | 0     |
| S12-final-viral-combined_k141_73574  | [full]      | 2086  | No  | NA   | 0  | 2 | Not-determined | Genome-fragment | NA    | 0     |
| S12-final-viral-combined_k141_58401  | [full]      | 2733  | No  | NA   | 1  | 1 | Low-quality    | Genome-fragment | 6.38  | 0     |
| S12-final-viral-combined_k141_39658  | [full]      | 1490  | No  | NA   | 0  | 3 | Not-determined | Genome-fragment | NA    | 0     |
| S12-final-viral-combined_k141_307923 | [full]      | 2385  | No  | NA   | 0  | 0 | Not-determined | Genome-fragment | NA    | 0     |
| S12-final-viral-combined_k141_56317  | [full]      | 1254  | No  | NA   | 1  | 1 | Not-determined | Genome-fragment | NA    | 0     |
| S12-final-viral-combined_k141_206517 | [full]      | 5204  | No  | NA   | 0  | 0 | Not-determined | Genome-fragment | NA    | 0     |
| S12-final-viral-combined_k141_356570 | [full]      | 1685  | No  | NA   | 0  | 2 | Not-determined | Genome-fragment | NA    | 0     |
| S12-final-viral-combined_k141_190917 | [full]      | 3184  | No  | NA   | 0  | 0 | Not-determined | Genome-fragment | NA    | 0     |
| S8-final-viral-combined_k141_120978  | [full]      | 2733  | No  | NA   | 0  | 1 | Low-quality    | Genome-fragment | 4.22  | 0     |
| S11-final-viral-combined_k141_180827 | [full]      | 2734  | No  | NA   | 0  | 1 | Low-quality    | Genome-fragment | 3.62  | 0     |
| S7-final-viral-combined_k141_224339  | [full]      | 2734  | No  | NA   | 0  | 0 | Low-quality    | Genome-fragment | 6.09  | 0     |
| S12-final-viral-combined_k141_46466  | [full]      | 2734  | No  | NA   | 1  | 1 | Low-quality    | Genome-fragment | 1.73  | 0     |
| S12-final-viral-combined_k141_391235 | [full]      | 1621  | No  | NA   | 0  | 0 | Not-determined | Genome-fragment | NA    | 0     |
| S12-final-viral-combined_k141_173600 | [full]      | 1037  | No  | NA   | 0  | 2 | Not-determined | Genome-fragment | NA    | 0     |
| S4-final-viral-combined_k141_140280  | [full]      | 2734  | No  | NA   | 1  | 0 | Low-quality    | Genome-fragment | 2.29  | 0     |
| S9_k141_33407                        | [full]      | 2735  | No  | NA   | 0  | 0 | Low-quality    | Genome-fragment | 5.76  | 0     |
| S12-final-viral-combined_k141_307957 | [full]      | 1530  | No  | NA   | 0  | 1 | Not-determined | Genome-fragment | NA    | 0     |
| S12-final-viral-combined_k141_156785 | [full]      | 1931  | No  | NA   | 0  | 0 | Not-determined | Genome-fragment | NA    | 0     |
| S6-final-viral-combined_k141_49531   | [full]      | 2735  | No  | NA   | 1  | 0 | Low-quality    | Genome-fragment | 3.46  | 0     |
| S11-final-viral-combined_k141_244293 | [full]      | 2736  | No  | NA   | 1  | 0 | Low-quality    | Genome-fragment | 4.78  | 0     |
| S1-final-viral-combined_k141_4996    | [full]      | 2736  | No  | NA   | 0  | 0 | Low-quality    | Genome-fragment | 4.43  | 0     |
| S1-final-viral-combined_k141_269856  | [full]      | 2737  | No  | NA   | 0  | 1 | Low-quality    | Genome-fragment | 1.1   | 0     |
| S12-final-viral-combined_k141_256729 | [full]      | 2915  | No  | NA   | 0  | 2 | Not-determined | Genome-fragment | NA    | 0     |
| S12-final-viral-combined_k141_324302 | [full]      | 8177  | No  | NA   | 0  | 6 | Not-determined | Genome-fragment | NA    | 0     |
| S12-final-viral-combined_k141_223412 | [full]      | 1492  | No  | NA   | 0  | 1 | Not-determined | Genome-fragment | NA    | 0     |
| S3-final-viral-combined_k141_21086   | [full]      | 2737  | No  | NA   | 0  | 1 | Low-quality    | Genome-fragment | 4.8   | 0     |
| S12-final-viral-combined_k141_307984 | [full]      | 1909  | No  | NA   | 0  | 1 | Not-determined | Genome-fragment | NA    | 0     |
| S12-final-viral-combined_k141_324308 | [full]      | 3078  | No  | NA   | 0  | 1 | Not-determined | Genome-fragment | NA    | 0     |
| S12-final-viral-combined_k141_122499 | [full]      | 8579  | No  | NA   | 0  | 0 | Not-determined | Genome-fragment | NA    | 0     |
| S7-final-viral-combined_k141_28330   | [full]      | 2737  | No  | NA   | 0  | 2 | Low-quality    | Genome-fragment | 0.75  | 0     |
| S12-final-viral-combined_k141_256761 | [full]      | 4225  | No  | NA   | 0  | 2 | Not-determined | Genome-fragment | NA    | 0     |
| S5-final-viral-combined_k141_51783   | [full]      | 2738  | No  | NA   | 0  | 1 | Low-quality    | Genome-fragment | 5.92  | 0     |
| S17-final-viral-combined_k141_113016 | [full]      | 2738  | No  | NA   | 2  | 0 | Low-quality    | Genome-fragment | 6.53  | 0     |
| S2-final-viral-combined_k141_128739  | [full]      | 2738  | No  | NA   | 0  | 0 | Low-quality    | Genome-fragment | 5.83  | 0     |
| S7-final-viral-combined_k141_219734  | [full]      | 2739  | No  | NA   | 0  | 0 | Low-quality    | Genome-fragment | 4.54  | 0     |
| S2-final-viral-combined_k141_105479  | [full]      | 2739  | No  | NA   | 0  | 0 | Low-quality    | Genome-fragment | 3.7   | 0     |
| S12-final-viral-combined_k141_55621  | [full]      | 3214  | No  | NA   | 0  | 2 | Not-determined | Genome-fragment | NA    | 0     |
| S12-final-viral-combined_k141_291180 | [full]      | 1511  | No  | NA   | 0  | 0 | Not-determined | Genome-fragment | NA    | 0     |
| S2_k141_233761                       | [full]      | 2739  | No  | NA   | 0  | 2 | Low-quality    | Genome-fragment | 0.83  | 0     |
| S4-final-viral-combined_k141_63968   | [full]      | 2739  | No  | NA   | 0  | 1 | Low-quality    | Genome-fragment | 2.2   | 0     |
| S12-final-viral-combined_k141_356603 | [full]      | 5992  | No  | NA   | 0  | 5 | Not-determined | Genome-fragment | NA    | 0     |
| S11-final-viral-combined_k141_229390 | [full]      | 2740  | No  | NA   | 0  | 1 | Low-quality    | Genome-fragment | 7.87  | 0     |
| S2-final-viral-combined_k141_146141  | [full]      | 2740  | No  | NA   | 0  | 1 | Low-quality    | Genome-fragment | 5.55  | 0     |
| S8-final-viral-combined_k141_226095  | [full]      | 2740  | No  | NA   | 5  | 0 | Low-quality    | Genome-fragment | 5.4   | 0     |
| S12-final-viral-combined_k141_89418  | [full]      | 4426  | No  | NA   | 3  | 1 | Not-determined | Genome-fragment | NA    | 0     |
| S12-final-viral-combined_k141_5820   | [full]      | 3145  | No  | NA   | 0  | 2 | Not-determined | Genome-fragment | NA    | 0     |
| S12-final-viral-combined_k141_39848  | [full]      | 1561  | No  | NA   | 0  | 0 | Not-determined | Genome-fragment | NA    | 0     |
| S1-final-viral-combined_k141_374267  | [full]      | 2741  | No  | NA   | 2  | 0 | Low-quality    | Genome-fragment | 1.62  | 0     |
| S2_k141_224799                       | [full]      | 2741  | No  | NA   | 0  | 3 | Low-quality    | Genome-fragment | 3.28  | 0     |
| S8-final-viral-combined_k141_5151    | [full]      | 2741  | No  | NA   | 0  | 0 | Low-quality    | Genome-fragment | 7.41  | 0     |
| S12-final-viral-combined_k141_35678  | [full]      | 1691  | No  | NA   | 0  | 0 | Not-determined | Genome-fragment | NA    | 0     |
| S8-final-viral-combined_k141_14551   | [full]      | 2742  | No  | NA   | 0  | 1 | Low-quality    | Genome-fragment | 1.57  | 0     |
| S1-final-viral-combined_k141_144330  | [full]      | 2742  | No  | NA   | 0  | 3 | Low-quality    | Genome-fragment | 0.66  | 0     |
| S12-final-viral-combined_k141_308074 | [full]      | 1770  | No  | NA   | 0  | 1 | Not-determined | Genome-fragment | NA    | 0     |
| S11-final-viral-combined_k141_140508 | [full]      | 2743  | No  | NA   | 0  | 1 | Low-quality    | Genome-fragment | 1.73  | 0     |
| S12-final-viral-combined_k141_22884  | [full]      | 6193  | No  | NA   | 0  | 4 | Not-determined | Genome-fragment | NA    | 0     |
| S7_k141_59537                        | [full]      | 2743  | No  | NA   | 0  | 1 | Low-quality    | Genome-fragment | 7.05  | 0     |
| S2-final-viral-combined_k141_155737  | [full]      | 2743  | No  | NA   | 0  | 1 | Low-quality    | Genome-fragment | 7.27  | 0     |
| S8-final-viral-combined_k141_94178   | [full]      | 2743  | No  | NA   | 1  | 0 | Low-quality    | Genome-fragment | 5.98  | 0     |
| S12-final-viral-combined_k141_39882  | [full]      | 4885  | No  | NA   | 0  | 0 | Not-determined | Genome-fragment | NA    | 0     |
| S7-final-viral-combined_k141_65518   | [full]      | 2744  | No  | NA   | 2  | 0 | Low-quality    | Genome-fragment | 3.33  | 0     |
| S12-final-viral-combined_k141_256826 | [full]      | 2048  | No  | NA   | 1  | 1 | Not-determined | Genome-fragment | NA    | 0     |
| S1-final-viral-combined_k141_282664  | [full]      | 2745  | No  | NA   | 0  | 2 | Low-quality    | Genome-fragment | 1.33  | 0     |
| S12-final-viral-combined_k141_106326 | [full]      | 1258  | No  | NA   | 0  | 2 | Not-determined | Genome-fragment | NA    | 0     |
| S12-final-viral-combined_k141_398981 | [full]      | 4620  | No  | NA   | 0  | 3 | Not-determined | Genome-fragment | NA    | 0     |
| S12-final-viral-combined_k141_191072 | [full]      | 4826  | No  | NA   | 0  | 0 | Not-determined | Genome-fragment | NA    | 0     |
| S12-final-viral-combined_k141_223598 | [full]      | 2667  | No  | NA   | 0  | 2 | Not-determined | Genome-fragment | NA    | 0     |
| S12-final-viral-combined_k141_240523 | [full]      | 8898  | No  | NA   | 11 | 1 | Not-determined | Genome-fragment | NA    | 0     |
| S12-final-viral-combined_k141_206736 | [full]      | 1957  | No  | NA   | 0  | 1 | Not-determined | Genome-fragment | NA    | 0     |
| S12-final-viral-combined_k141_206739 | [full]      | 1324  | No  | NA   | 0  | 2 | Not-determined | Genome-fragment | NA    | 0     |
| S12-final-viral-combined_k141_308177 | [full]      | 1518  | No  | NA   | 0  | 0 | Not-determined | Genome-fragment | NA    | 0     |
| S1-final-viral-combined_k141_149781  | [full]      | 2745  | No  | NA   | 0  | 1 | Low-quality    | Genome-fragment | 4.75  | 0     |
| S1_k141_220334                       | [full]      | 2745  | No  | NA   | 1  | 0 | Low-quality    | Genome-fragment | 6.03  | 0     |
| S12-final-viral-combined_k141_55775  | [full]      | 6929  | No  | NA   | 0  | 3 | Not-determined | Genome-fragment | NA    | 0     |
| S12-final-viral-combined_k141_140159 | [full]      | 6641  | No  | NA   | 2  | 0 | Not-determined | Genome-fragment | NA    | 0     |
| S12-final-viral-combined_k141_5952   | [full]      | 2343  | No  | NA   | 0  | 2 | Not-determined | Genome-fragment | NA    | 0     |
| S7-final-viral-combined_k141_210723  | [full]      | 2745  | No  | NA   | 0  | 1 | Low-quality    | Genome-fragment | 1.74  | 0     |
| S17-k141_142240                      | [full]      | 2745  | No  | NA   | 0  | 0 | Low-quality    | Genome-fragment | 9.52  | 0     |
| S12-final-viral-combined_k141_73834  | [full]      | 3063  | No  | NA   | 0  | 1 | Not-determined | Genome-fragment | NA    | 0     |
| S12-final-viral-combined_k141_273931 | [full]      | 5816  | No  | NA   | 0  | 5 | Not-determined | Genome-fragment | NA    | 0     |
| S12-final-viral-combined_k141_240577 | [full]      | 1106  | No  | NA   | 0  | 1 | Not-determined | Genome-fragment | NA    | 0     |
| S17-final-viral-combined_k141_448231 | [full]      | 2746  | No  | NA   | 0  | 1 | Low-quality    | Genome-fragment | 1.29  | 0     |
| S12-final-viral-combined_k141_391435 | [full]      | 2147  | No  | NA   | 0  | 1 | Not-determined | Genome-fragment | NA    | 0     |
| S12-final-viral-combined_k141_39994  | [full]      | 5842  | No  | NA   | 0  | 3 | Not-determined | Genome-fragment | NA    | 0     |
| S12-final-viral-combined_k141_221700 | [full]      | 2739  | No  | NA   | 0  | 2 | Not-determined | Genome-fragment | NA    | 0     |
| S12-final-viral-combined_k141_543331 | [full]      | 2746  | No  | NA   | 0  | 2 | Low-quality    | Genome-fragment | 4.23  | 0     |
| S12-final-viral-combined_k141_273983 | [full]      | 4600  | No  | NA   | 0  | 1 | Not-determined | Genome-fragment | NA    | 0     |
| S8-final-viral-combined_k141_151101  | [full]      | 2747  | No  | NA   | 0  | 1 | Low-quality    | Genome-fragment | 2.04  | 0     |
| S12-final-viral-combined_k141_308284 | [full]      | 5534  | No  | NA   | 0  | 3 | Not-determined | Genome-fragment | NA    | 0     |
| S11-final-viral-combined_k141_188519 | [full]      | 2748  | No  | NA   | 2  | 0 | Low-quality    | Genome-fragment | 3.38  | 0     |
| S5-final-viral-combined_k141_240011  | [full]      | 2748  | No  | NA   | 0  | 1 | Low-quality    | Genome-fragment | 0.45  | 0     |
| S12-final-viral-combined_k141_37478  | [full]      | 2679  | No  | NA   | 0  | 1 | Not-determined | Genome-fragment | NA    | 0     |
| S12-final-viral-combined_k141_223769 | [full]      | 1726  | No  | NA   | 0  | 1 | Not-determined | Genome-fragment | NA    | 0     |
| S12-final-viral-combined_k141_191398 | [full]      | 5280  | No  | NA   | 0  | 3 | Not-determined | Genome-fragment | NA    | 0     |
| S17-final-viral-combined_k141_256523 | [full]      | 2748  | No  | NA   | 0  | 1 | Low-quality    | Genome-fragment | 6.53  | 0     |
| S12-final-viral-combined_k141_122762 | [full]      | 4950  | No  | NA   | 0  | 5 | Not-determined | Genome-fragment | NA    | 0     |
| S11-final-viral-combined_k141_292418 | [full]      | 2749  | No  | NA   | 1  | 0 | Low-quality    | Genome-fragment | 4.69  | 0     |
| S12-final-viral-combined_k141_23063  | [full]      | 3020  | No  | NA   | 0  | 2 | Not-determined | Genome-fragment | NA    | 0     |
| S11_k141_163147                      | [full]      | 2749  | No  | NA   | 0  | 0 | Low-quality    | Genome-fragment | 5.89  | 0     |
| S1-final-viral-combined_k141_290976  | [full]      | 2749  | No  | NA   | 0  | 3 | Low-quality    | Genome-fragment | 4.56  | 0     |
| S7-final-viral-combined_k141_214072  | [full]      | 2749  | No  | NA   | 0  | 0 | Low-quality    | Genome-fragment | 6.74  | 0     |
| S12-final-viral-combined_k141_55925  | [full]      | 1731  | No  | NA   | 0  | 2 | Not-determined |                 |       |       |



|                                       |        |       |     |    |    |    |                |                 |    |       |       |
|---------------------------------------|--------|-------|-----|----|----|----|----------------|-----------------|----|-------|-------|
| S12-final-viral-combined_k141_2240931 | [full] | 2560  | No  | NA | 0  | 2  | Not-determined | Genome-fragment | NA | 2.58  | 0     |
| S8-final-viral-combined_k141_101761   | [full] | 2755  | No  | NA | 0  | 0  | Low-quality    | Genome-fragment | NA | 0     | 0     |
| S12-final-viral-combined_k141_1405131 | [full] | 5190  | No  | NA | 0  | 0  | Not-determined | Genome-fragment | NA | 0     | 0     |
| S12-final-viral-combined_k141_2742731 | [full] | 6973  | No  | NA | 0  | 5  | Not-determined | Genome-fragment | NA | 0     | 0     |
| S11-final-viral-combined_k141_2275041 | [full] | 2756  | No  | NA | 1  | 0  | Low-quality    | Genome-fragment | NA | 5.93  | 0     |
| S1-final-viral-combined_k141_184461   | [full] | 2756  | No  | NA | 0  | 0  | Low-quality    | Genome-fragment | NA | 7.06  | 0     |
| S3-final-viral-combined_k141_686991   | [full] | 2756  | No  | NA | 0  | 0  | Low-quality    | Genome-fragment | NA | 6.43  | 0     |
| S12-final-viral-combined_k141_1066821 | [full] | 3412  | No  | NA | 0  | 0  | Not-determined | Genome-fragment | NA | 5.02  | 0     |
| S5-final-viral-combined_k141_1670141  | [full] | 2757  | No  | NA | 0  | 0  | Low-quality    | Genome-fragment | NA | 0     | 0     |
| S7-final-viral-combined_k141_1977931  | [full] | 2757  | No  | NA | 0  | 0  | Low-quality    | Genome-fragment | NA | 5.25  | 0     |
| S7-final-viral-combined_k141_281291   | [full] | 2757  | Yes | NA | 1  | 1  | Low-quality    | Genome-fragment | NA | 0.39  | 87.89 |
| S2_k141_78029                         | [full] | 2757  | No  | NA | 0  | 0  | Low-quality    | Genome-fragment | NA | 1.16  | 0     |
| S12-final-viral-combined_k141_63751   | [full] | 1714  | No  | NA | 0  | 1  | Not-determined | Genome-fragment | NA | 0     | 0     |
| S12-final-viral-combined_k141_3086181 | [full] | 1893  | No  | NA | 0  | 0  | Not-determined | Genome-fragment | NA | 0     | 0     |
| S12-final-viral-combined_k141_1405511 | [full] | 6053  | No  | NA | 0  | 4  | Not-determined | Genome-fragment | NA | 0     | 0     |
| S12-final-viral-combined_k141_3406861 | [full] | 2653  | No  | NA | 0  | 1  | Not-determined | Genome-fragment | NA | 0     | 0     |
| S12-final-viral-combined_k141_2573231 | [full] | 5351  | No  | NA | 0  | 2  | Not-determined | Genome-fragment | NA | 0     | 0     |
| S12_k141_243632                       | [full] | 2758  | No  | NA | 1  | 0  | Low-quality    | Genome-fragment | NA | 1.49  | 0     |
| S12-final-viral-combined_k141_1230561 | [full] | 4528  | No  | NA | 2  | 2  | Not-determined | Genome-fragment | NA | 0     | 0     |
| S2-final-viral-combined_k141_2104501  | [full] | 2758  | No  | NA | 0  | 0  | Low-quality    | Genome-fragment | NA | 5.15  | 0     |
| S4-final-viral-combined_k141_503801   | [full] | 2758  | No  | NA | 1  | 0  | Low-quality    | Genome-fragment | NA | 7.89  | 0     |
| S12-final-viral-combined_k141_1230601 | [full] | 2521  | No  | NA | 0  | 0  | Not-determined | Genome-fragment | NA | 0     | 0     |
| S12-final-viral-combined_k141_561431  | [full] | 2253  | No  | NA | 0  | 2  | Not-determined | Genome-fragment | NA | 0     | 0     |
| S12-final-viral-combined_k141_233241  | [full] | 1299  | No  | NA | 0  | 1  | Not-determined | Genome-fragment | NA | 0     | 0     |
| S11-final-viral-combined_k141_1965841 | [full] | 2759  | No  | NA | 0  | 0  | Low-quality    | Genome-fragment | NA | 3.39  | 0     |
| S12-final-viral-combined_k141_1007541 | [full] | 1511  | No  | NA | 0  | 0  | Not-determined | Genome-fragment | NA | 0     | 0     |
| S12-final-viral-combined_k141_2573281 | [full] | 6241  | No  | NA | 0  | 1  | Not-determined | Genome-fragment | NA | 0     | 0     |
| S11-final-viral-combined_k141_1808951 | [full] | 2760  | No  | NA | 0  | 3  | Low-quality    | Genome-fragment | NA | 0.8   | 0     |
| S12-final-viral-combined_k141_3750671 | [full] | 2236  | No  | NA | 0  | 0  | Not-determined | Genome-fragment | NA | 0     | 0     |
| S12-final-viral-combined_k141_2743621 | [full] | 1026  | No  | NA | 0  | 0  | Not-determined | Genome-fragment | NA | 0     | 0     |
| S5-final-viral-combined_k141_1524431  | [full] | 2760  | No  | NA | 1  | 0  | Low-quality    | Genome-fragment | NA | 4.58  | 0     |
| S12-final-viral-combined_k141_173851  | [full] | 3214  | No  | NA | 0  | 2  | Not-determined | Genome-fragment | NA | 0     | 0     |
| S12-final-viral-combined_k141_2242031 | [full] | 5787  | No  | NA | 0  | 2  | Not-determined | Genome-fragment | NA | 0     | 0     |
| S12-final-viral-combined_k141_2917881 | [full] | 8447  | No  | NA | 0  | 6  | Not-determined | Genome-fragment | NA | 0     | 0     |
| S12-final-viral-combined_k141_403801  | [full] | 1493  | No  | NA | 0  | 0  | Not-determined | Genome-fragment | NA | 0     | 0     |
| S2-final-viral-combined_k141_182101   | [full] | 2760  | No  | NA | 0  | 0  | Low-quality    | Genome-fragment | NA | 7.84  | 0     |
| S7-final-viral-combined_k141_2218901  | [full] | 2761  | No  | NA | 3  | 0  | Low-quality    | Genome-fragment | NA | 5.95  | 0     |
| S12-final-viral-combined_k141_2573951 | [full] | 1619  | No  | NA | 0  | 0  | Not-determined | Genome-fragment | NA | 0     | 0     |
| S12-final-viral-combined_k141_90211   | [full] | 7214  | No  | NA | 0  | 3  | Not-determined | Genome-fragment | NA | 0     | 0     |
| S12-final-viral-combined_k141_3750861 | [full] | 1143  | No  | NA | 0  | 0  | Not-determined | Genome-fragment | NA | 0     | 0     |
| S17-final-viral-combined_k141_655581  | [full] | 2761  | No  | NA | 2  | 0  | Low-quality    | Genome-fragment | NA | 3.35  | 0     |
| S1_k141_238102                        | [full] | 2762  | No  | NA | 0  | 1  | Low-quality    | Genome-fragment | NA | 6.49  | 0     |
| S7-final-viral-combined_k141_1433421  | [full] | 2762  | No  | NA | 0  | 0  | Low-quality    | Genome-fragment | NA | 2.6   | 0     |
| S17_k141_118788                       | [full] | 2762  | No  | NA | 0  | 2  | Low-quality    | Genome-fragment | NA | 2.47  | 0     |
| S12-final-viral-combined_k141_1409201 | [full] | 2762  | No  | NA | 0  | 1  | Low-quality    | Genome-fragment | NA | 3.59  | 0     |
| S12-final-viral-combined_k141_3919131 | [full] | 1972  | No  | NA | 0  | 2  | Not-determined | Genome-fragment | NA | 0     | 0     |
| S12-final-viral-combined_k141_2574591 | [full] | 1819  | No  | NA | 0  | 3  | Not-determined | Genome-fragment | NA | 0     | 0     |
| S12_k141_198853                       | [full] | 2762  | No  | NA | 0  | 2  | Low-quality    | Genome-fragment | NA | 1.33  | 0     |
| S12-final-viral-combined_k141_1575061 | [full] | 2133  | No  | NA | 0  | 0  | Not-determined | Genome-fragment | NA | 0     | 0     |
| S12-final-viral-combined_k141_1575121 | [full] | 2544  | No  | NA | 0  | 1  | Not-determined | Genome-fragment | NA | 0     | 0     |
| S12-final-viral-combined_k141_2744461 | [full] | 6759  | No  | NA | 0  | 4  | Not-determined | Genome-fragment | NA | 0     | 0     |
| S12-final-viral-combined_k141_2572161 | [full] | 2264  | No  | NA | 0  | 2  | Not-determined | Genome-fragment | NA | 0     | 0     |
| S2-final-viral-combined_k141_1328671  | [full] | 2762  | No  | NA | 0  | 1  | Low-quality    | Genome-fragment | NA | 3.08  | 0     |
| S9-final-viral-combined_k141_918691   | [full] | 2763  | No  | NA | 0  | 4  | Low-quality    | Genome-fragment | NA | 1.44  | 0     |
| S11-final-viral-combined_k141_2166371 | [full] | 2763  | No  | NA | 0  | 0  | Low-quality    | Genome-fragment | NA | 1.12  | 0     |
| S6_k141_127335                        | [full] | 2764  | No  | NA | 0  | 0  | Low-quality    | Genome-fragment | NA | 1.47  | 0     |
| S12-final-viral-combined_k141_902631  | [full] | 17033 | No  | NA | 0  | 13 | Not-determined | Genome-fragment | NA | 0     | 0     |
| S12-final-viral-combined_k141_308751  | [full] | 2814  | No  | NA | 0  | 0  | Not-determined | Genome-fragment | NA | 0     | 0     |
| S12-final-viral-combined_k141_233851  | [full] | 2803  | No  | NA | 0  | 0  | Not-determined | Genome-fragment | NA | 0     | 0     |
| S8-final-viral-combined_k141_1008491  | [full] | 2764  | No  | NA | 0  | 3  | Low-quality    | Genome-fragment | NA | 1.92  | 0     |
| S12-final-viral-combined_k141_2074851 | [full] | 10504 | No  | NA | 0  | 2  | Not-determined | Genome-fragment | NA | 0     | 0     |
| S12-final-viral-combined_k141_2408921 | [full] | 2361  | No  | NA | 0  | 1  | Not-determined | Genome-fragment | NA | 0     | 0     |
| S12-final-viral-combined_k141_2575341 | [full] | 2348  | No  | NA | 0  | 0  | Not-determined | Genome-fragment | NA | 0     | 0     |
| S11-final-viral-combined_k141_749121  | [full] | 2765  | No  | NA | 2  | 0  | Low-quality    | Genome-fragment | NA | 6.59  | 0     |
| S1-final-viral-combined_k141_3790811  | [full] | 2765  | No  | NA | 0  | 0  | Low-quality    | Genome-fragment | NA | 1.91  | 0     |
| S17_k141_254689                       | [full] | 2765  | No  | NA | 0  | 0  | Low-quality    | Genome-fragment | NA | 5.45  | 0     |
| S8-final-viral-combined_k141_1741461  | [full] | 2765  | No  | NA | 0  | 1  | Low-quality    | Genome-fragment | NA | 4.05  | 0     |
| S11-final-viral-combined_k141_145731  | [full] | 2766  | No  | NA | 0  | 2  | Low-quality    | Genome-fragment | NA | 1.53  | 0     |
| S2_k141_137390                        | [full] | 2766  | No  | NA | 0  | 0  | Low-quality    | Genome-fragment | NA | 6.17  | 0     |
| S12-final-viral-combined_k141_1915701 | [full] | 26127 | No  | NA | 16 | 0  | Medium-quality | Genome-fragment | NA | 58.02 | 0     |
| S12-final-viral-combined_k141_340871  | [full] | 3023  | No  | NA | 0  | 0  | Not-determined | Genome-fragment | NA | 0     | 0     |
| S6-final-viral-combined_k141_36001    | [full] | 2766  | No  | NA | 0  | 1  | Low-quality    | Genome-fragment | NA | 1.27  | 0     |
| S12-final-viral-combined_k141_744051  | [full] | 1675  | No  | NA | 0  | 2  | Not-determined | Genome-fragment | NA | 0     | 0     |
| S12-final-viral-combined_k141_1915841 | [full] | 1723  | No  | NA | 0  | 0  | Not-determined | Genome-fragment | NA | 0     | 0     |
| S9-final-viral-combined_k141_183771   | [full] | 2767  | No  | NA | 0  | 0  | Low-quality    | Genome-fragment | NA | 5.57  | 0     |
| S12-final-viral-combined_k141_1407151 | [full] | 2354  | No  | NA | 0  | 0  | Not-determined | Genome-fragment | NA | 0     | 0     |
| S5-final-viral-combined_k141_1921951  | [full] | 2767  | No  | NA | 2  | 0  | Low-quality    | Genome-fragment | NA | 6.39  | 0     |
| S5-final-viral-combined_k141_215881   | [full] | 2767  | No  | NA | 1  | 0  | Low-quality    | Genome-fragment | NA | 7.03  | 0     |
| S11-final-viral-combined_k141_1099521 | [full] | 2768  | No  | NA | 0  | 1  | Low-quality    | Genome-fragment | NA | 4.79  | 0     |
| S12-final-viral-combined_k141_903541  | [full] | 1717  | No  | NA | 0  | 1  | Not-determined | Genome-fragment | NA | 0     | 0     |
| S12-final-viral-combined_k141_3409351 | [full] | 1372  | No  | NA | 0  | 2  | Not-determined | Genome-fragment | NA | 0     | 0     |
| S5-final-viral-combined_k141_1758211  | [full] | 2768  | No  | NA | 0  | 0  | Low-quality    | Genome-fragment | NA | 4.79  | 0     |
| S12-final-viral-combined_k141_65471   | [full] | 1058  | No  | NA | 0  | 0  | Not-determined | Genome-fragment | NA | 0     | 0     |
| S12-final-viral-combined_k141_3250071 | [full] | 2048  | No  | NA | 0  | 1  | Not-determined | Genome-fragment | NA | 0     | 0     |
| S12-final-viral-combined_k141_207591  | [full] | 1815  | No  | NA | 0  | 0  | Not-determined | Genome-fragment | NA | 0     | 0     |
| S12-final-viral-combined_k141_2409321 | [full] | 2954  | No  | NA | 0  | 3  | Not-determined | Genome-fragment | NA | 0     | 0     |
| S12-final-viral-combined_k141_3920631 | [full] | 1796  | No  | NA | 0  | 1  | Not-determined | Genome-fragment | NA | 0     | 0     |
| S12-final-viral-combined_k141_903821  | [full] | 3362  | No  | NA | 0  | 2  | Not-determined | Genome-fragment | NA | 0     | 0     |
| S6_k141_105721                        | [full] | 2768  | Yes | NA | 1  | 0  | Low-quality    | Genome-fragment | NA | 1.64  | 64.82 |
| S12-final-viral-combined_k141_1407661 | [full] | 6981  | No  | NA | 0  | 3  | Not-determined | Genome-fragment | NA | 0     | 0     |
| S11-final-viral-combined_k141_507421  | [full] | 2769  | No  | NA | 1  | 0  | Low-quality    | Genome-fragment | NA | 6.04  | 0     |
| S12-final-viral-combined_k141_659111  | [full] | 1066  | No  | NA | 0  | 0  | Not-determined | Genome-fragment | NA | 0     | 0     |
| S12-final-viral-combined_k141_1233101 | [full] | 1967  | No  | NA | 0  | 2  | Not-determined | Genome-fragment | NA | 0     | 0     |
| S12-final-viral-combined_k141_1188591 | [full] | 2769  | No  | NA | 0  | 2  | Low-quality    | Genome-fragment | NA | 2.95  | 0     |
| S12-final-viral-combined_k141_2746061 | [full] | 3263  | No  | NA | 0  | 2  | Not-determined | Genome-fragment | NA | 6.59  | 0     |
| S17-final-viral-combined_k141_875251  | [full] | 2769  | No  | NA | 2  | 0  | Low-quality    | Genome-fragment | NA | 4.73  | 0     |
| S4-final-viral-combined_k141_184791   | [full] | 2769  | No  | NA | 0  | 0  | Low-quality    | Genome-fragment | NA | 0     | 0     |
| S12-final-viral-combined_k141_1233221 | [full] | 6543  | No  | NA | 0  | 1  | Not-determined | Genome-fragment | NA | 0     | 0     |
| S12-final-viral-combined_k141_325061  | [full] | 2418  | No  | NA | 0  | 0  | Not-determined | Genome-fragment | NA | 0     | 0     |
| S8-final-viral-combined_k141_933251   | [full] | 2769  | No  | NA | 0  | 2  | Low-quality    | Genome-fragment | NA | 5.06  | 0     |
| S11-final-viral-combined_k141_1331351 | [full] | 2770  | No  | NA | 0  | 2  | Low-quality    | Genome-fragment | NA | 2.24  | 0     |
| S12-final-viral-combined_k141_2241831 | [full] | 1262  | No  | NA | 0  | 0  | Not-determined | Genome-fragment | NA | 0     | 0     |
| S1-final-viral-combined_k141_141511   | [full] | 2770  | No  | NA | 0  | 0  | Low-quality    | Genome-fragment | NA | 1.81  | 0     |
| S6-final-viral-combined_k141_1415771  | [full] | 2770  | No  | NA | 1  | 0  | Low-quality    | Genome-fragment | NA | 4.6   | 0     |
| S8_k141_222760                        | [full] | 2770  | No  | NA | 1  | 0  | Low-quality    | Genome-fragment | NA | 4.61  | 0     |
| S12-final-viral-combined_k141_1577731 | [full] | 2069  | No  | NA | 0  | 1  | Not-determined | Genome-fragment | NA | 0     | 0     |
| S12-final-viral-combined_k141_2576611 | [full] | 2162  | No  | NA | 0  | 1  | Not-determined | Genome-fragment | NA | 0     | 0     |
| S4-final-viral-combined_k141_10191    | [full] | 2771  | No  | NA | 2  | 0  | Low-quality    | Genome-fragment | NA | 6.74  | 0     |
| S11-final-viral-combined_k141_3031621 | [full] | 2772  | No  | NA | 6  | 0  | Low-quality    | Genome-fragment | NA | 4.58  | 0     |
| S11-final-viral-combined_k141_494491  | [full] | 2772  | Yes | NA | 1  | 0  | Low-quality    | Genome-fragment | NA | 3.34  | 42.24 |
| S17-final-viral-combined_k141_673731  | [full] | 2772  | No  | NA | 3  | 0  | Low-quality    | Genome-fragment | NA | 5.98  | 0     |
| S17-final-viral-combined_k141_23471   | [full] | 2772  | No  | NA | 0  | 0  | Low-quality    | Genome-fragment | NA | 3.87  | 0     |
| S12-final-viral-combined_k141_235021  | [full] | 6568  | No  | NA | 0  | 2  | Not-determined | Genome-fragment | NA | 0     | 0     |
| S12-final-viral-combined_k141_2576851 | [full] | 1848  | No  | NA | 0  | 0  | Not-determined | Genome-fragment | NA | 0     | 0     |
| S12-final-viral-combined_k141_2747321 | [full] | 2325  | No  | NA | 0  | 0  | Not-determined | Genome-fragment | NA | 0     | 0     |
| S12-final-viral-combined_k141_235091  | [full] | 1819  | No  | NA | 0  | 0  | Not-determined | Genome-fragment | NA | 0     | 0     |
| S12-final-viral-combined_k141_77391   | [full] | 2773  | No  | NA | 0  | 1  | Low-quality    | Genome-fragment | NA | 2.53  | 0     |
| S12-final-viral-combined_k141_2577961 | [full] | 9787  | No  | NA | 0  | 8  | Not-determined | Genome-fragment | NA | 0     | 0     |
| S12-final-viral-combined_k141_1764261 | [full] | 2773  | No  | NA | 0  | 1  | Low-quality    | Genome-fragment | NA | 6.99  | 0     |
| S12-final-viral-combined_k141_2577051 | [full] | 5244  | No  | NA | 0  | 2  | Not-determined | Genome-fragment | NA | 0     | 0     |
| S12-final-viral-combined_k141         |        |       |     |    |    |    |                |                 |    |       |       |



|                                      |       |     |       |    |   |                 |                 |       |       |
|--------------------------------------|-------|-----|-------|----|---|-----------------|-----------------|-------|-------|
| S2_k141_230012                       | 2782  | No  | NA    | 0  | 2 | Low-quality     | Genome-fragment | 0.53  | 0     |
| S12-final-viral-combined_k141_375532 | 1603  | No  | NA    | 0  | 1 | Not-determined  | Genome-fragment | NA    | 0     |
| S12-final-viral-combined_k141_357682 | 4454  | No  | NA    | 0  | 0 | Not-determined  | Genome-fragment | NA    | 0     |
| S12-final-viral-combined_k141_309126 | 4069  | No  | NA    | 0  | 1 | Not-determined  | Genome-fragment | NA    | 0     |
| S12-final-viral-combined_k141_309135 | 2920  | No  | NA    | 0  | 0 | Not-determined  | Genome-fragment | NA    | 0     |
| S12-final-viral-combined_k141_241871 | 1148  | No  | NA    | 0  | 2 | Not-determined  | Genome-fragment | NA    | 0     |
| S12-final-viral-combined_k141_6941   | 1622  | No  | NA    | 0  | 0 | Not-determined  | Genome-fragment | NA    | 0     |
| S8-final-viral-combined_k141_58542   | 2782  | No  | NA    | 0  | 0 | Low-quality     | Genome-fragment | NA    | 2.94  |
| S12-final-viral-combined_k141_158061 | 1661  | No  | NA    | 0  | 1 | Not-determined  | Genome-fragment | NA    | 0     |
| S11-final-viral-combined_k141_134925 | 2783  | No  | NA    | 0  | 3 | Low-quality     | Genome-fragment | 6.05  | 0     |
| S1_k141_183559                       | 2783  | No  | NA    | 1  | 0 | Low-quality     | Genome-fragment | 4.8   | 0     |
| S12-final-viral-combined_k141_567341 | 7023  | No  | NA    | 0  | 1 | Not-determined  | Genome-fragment | NA    | 0     |
| S12-final-viral-combined_k141_325407 | 1934  | No  | NA    | 0  | 0 | Not-determined  | Genome-fragment | NA    | 0     |
| S12-final-viral-combined_k141_224751 | 1728  | No  | NA    | 0  | 2 | Not-determined  | Genome-fragment | NA    | 0     |
| S12-final-viral-combined_k141_6948   | 1627  | No  | NA    | 0  | 0 | Not-determined  | Genome-fragment | NA    | 0     |
| S12-final-viral-combined_k141_341078 | 1773  | No  | NA    | 0  | 0 | Not-determined  | Genome-fragment | NA    | 0     |
| S3_k141_53117                        | 2783  | No  | NA    | 0  | 0 | Low-quality     | Genome-fragment | 1.28  | 0     |
| S12-final-viral-combined_k141_174358 | 1082  | No  | NA    | 0  | 1 | Not-determined  | Genome-fragment | NA    | 0     |
| S11-final-viral-combined_k141_66276  | 2784  | No  | NA    | 1  | 0 | Low-quality     | Genome-fragment | 1.32  | 0     |
| S3-final-viral-combined_k141_117963  | 2784  | No  | NA    | 0  | 2 | Low-quality     | Genome-fragment | 4.05  | 0     |
| S12-final-viral-combined_k141_325418 | 34704 | No  | NA    | 9  | 0 | Medium-quality  | Genome-fragment | 71.85 | 0     |
| S12-final-viral-combined_k141_241324 | 2086  | No  | NA    | 0  | 2 | Not-determined  | Genome-fragment | NA    | 0     |
| S12-final-viral-combined_k141_192017 | 4766  | No  | NA    | 0  | 4 | Not-determined  | Genome-fragment | NA    | 0     |
| S12-final-viral-combined_k141_309184 | 1202  | No  | NA    | 0  | 0 | Not-determined  | Genome-fragment | NA    | 0     |
| S12-final-viral-combined_k141_193531 | 2784  | No  | NA    | 1  | 0 | Low-quality     | Genome-fragment | 6.93  | 0     |
| S12-final-viral-combined_k141_192021 | 1552  | No  | NA    | 0  | 3 | Not-determined  | Genome-fragment | NA    | 0     |
| S12-final-viral-combined_k141_192023 | 2329  | No  | NA    | 0  | 2 | Not-determined  | Genome-fragment | NA    | 0     |
| S12-final-viral-combined_k141_309188 | 3401  | No  | NA    | 0  | 3 | Not-determined  | Genome-fragment | NA    | 0     |
| S12-final-viral-combined_k141_241513 | 2770  | No  | NA    | 0  | 0 | Not-determined  | Genome-fragment | NA    | 0     |
| S12-final-viral-combined_k141_341336 | 2444  | No  | NA    | 0  | 1 | Not-determined  | Genome-fragment | NA    | 0     |
| S12-final-viral-combined_k141_40848  | 1984  | No  | NA    | 0  | 2 | Not-determined  | Genome-fragment | NA    | 0     |
| S12-final-viral-combined_k141_341341 | 1682  | No  | NA    | 1  | 1 | Not-determined  | Genome-fragment | NA    | 0     |
| S12-final-viral-combined_k141_141143 | 1989  | No  | NA    | 0  | 2 | Not-determined  | Genome-fragment | NA    | 0     |
| S12-final-viral-combined_k141_192038 | 1974  | No  | NA    | 0  | 2 | Not-determined  | Genome-fragment | NA    | 0     |
| S4_k141_87387                        | 2784  | No  | NA    | 0  | 3 | Low-quality     | Genome-fragment | 1.58  | 0     |
| S12-final-viral-combined_k141_23861  | 10779 | No  | NA    | 1  | 1 | Not-determined  | Genome-fragment | NA    | 0     |
| S12-final-viral-combined_k141_375700 | 4116  | No  | NA    | 0  | 3 | Not-determined  | Genome-fragment | NA    | 0     |
| S12-final-viral-combined_k141_10969  | 5658  | No  | NA    | 0  | 4 | Not-determined  | Genome-fragment | NA    | 0     |
| S11-final-viral-combined_k141_192444 | 2785  | No  | NA    | 2  | 0 | Low-quality     | Genome-fragment | 6.18  | 0     |
| S12-final-viral-combined_k141_374958 | 2785  | No  | NA    | 1  | 0 | Low-quality     | Genome-fragment | 7.26  | 0     |
| S12-final-viral-combined_k141_241300 | 2388  | No  | NA    | 0  | 0 | Not-determined  | Genome-fragment | NA    | 0     |
| S12-final-viral-combined_k141_309237 | 2925  | No  | NA    | 0  | 0 | Not-determined  | Genome-fragment | NA    | 0     |
| S12-final-viral-combined_k141_107354 | 4049  | No  | NA    | 0  | 0 | Not-determined  | Genome-fragment | NA    | 0     |
| S12-final-viral-combined_k141_343388 | 2785  | No  | NA    | 0  | 2 | Low-quality     | Genome-fragment | 0.89  | 0     |
| S12-final-viral-combined_k141_107356 | 1583  | No  | NA    | 0  | 1 | Not-determined  | Genome-fragment | NA    | 0     |
| S5-final-viral-combined_k141_57164   | 2785  | No  | NA    | 2  | 0 | Low-quality     | Genome-fragment | 6.98  | 0     |
| S12-final-viral-combined_k141_104011 | 2785  | No  | NA    | 1  | 0 | Low-quality     | Genome-fragment | 1.29  | 0     |
| S12-final-viral-combined_k141_207950 | 1954  | No  | NA    | 0  | 2 | Not-determined  | Genome-fragment | NA    | 0     |
| S11-final-viral-combined_k141_390276 | 2786  | Yes | 286   | 1  | 2 | Low-quality     | Genome-fragment | 0.22  | 89.73 |
| S8-final-viral-combined_k141_248385  | 2786  | No  | NA    | 0  | 2 | Low-quality     | Genome-fragment | 7.26  | 0     |
| S12-final-viral-combined_k141_20797  | 2712  | No  | NA    | 0  | 1 | Not-determined  | Genome-fragment | NA    | 0     |
| S12-final-viral-combined_k141_158246 | 2318  | No  | NA    | 0  | 0 | Not-determined  | Genome-fragment | NA    | 0     |
| S3-final-viral-combined_k141_26678   | 2787  | No  | NA    | 1  | 0 | Low-quality     | Genome-fragment | 7.31  | 0     |
| S12-final-viral-combined_k141_309365 | 1571  | No  | NA    | 0  | 0 | Not-determined  | Genome-fragment | NA    | 0     |
| S12-final-viral-combined_k141_241559 | 2847  | No  | NA    | 0  | 3 | Not-determined  | Genome-fragment | NA    | 0     |
| S3-final-viral-combined_k141_137528  | 2787  | No  | NA    | 0  | 0 | Low-quality     | Genome-fragment | 3.9   | 0     |
| S12-final-viral-combined_k141_208007 | 1334  | No  | NA    | 0  | 0 | Not-determined  | Genome-fragment | NA    | 0     |
| S12-final-viral-combined_k141_32547  | 881   | No  | NA    | 0  | 0 | Not-determined  | Genome-fragment | NA    | 0     |
| S12-final-viral-combined_k141_238144 | 2787  | No  | NA    | 0  | 0 | Low-quality     | Genome-fragment | 3.18  | 0     |
| S12-final-viral-combined_k141_258130 | 2021  | No  | NA    | 0  | 2 | Not-determined  | Genome-fragment | NA    | 4.61  |
| S12-final-viral-combined_k141_305853 | 2787  | No  | NA    | 0  | 1 | Low-quality     | Genome-fragment | 4.71  | 0     |
| S11-final-viral-combined_k141_46553  | 2788  | No  | NA    | 0  | 1 | Low-quality     | Genome-fragment | 4.71  | 0     |
| S12-final-viral-combined_k141_177980 | 2788  | No  | NA    | 1  | 0 | Low-quality     | Genome-fragment | 1.51  | 0     |
| S12-final-viral-combined_k141_192144 | 2465  | No  | NA    | 0  | 1 | Not-determined  | Genome-fragment | NA    | 0     |
| S12-final-viral-combined_k141_341469 | 4099  | No  | NA    | 0  | 0 | Not-determined  | Genome-fragment | NA    | 0     |
| S11-final-viral-combined_k141_105650 | 2789  | Yes | 1289  | 1  | 1 | Low-quality     | Genome-fragment | 3.34  | 53.78 |
| S12-final-viral-combined_k141_392591 | 2061  | No  | NA    | 0  | 0 | Not-determined  | Genome-fragment | NA    | 0     |
| S12-final-viral-combined_k141_36841  | 1029  | No  | NA    | 0  | 0 | Not-determined  | Genome-fragment | NA    | 0     |
| S12-final-viral-combined_k141_7035   | 5833  | No  | NA    | 0  | 4 | Not-determined  | Genome-fragment | NA    | 0     |
| S7-final-viral-combined_k141_240342  | 2789  | No  | NA    | 0  | 0 | Low-quality     | Genome-fragment | 5.87  | 0     |
| S12-final-viral-combined_k141_357980 | 3101  | No  | NA    | 0  | 2 | Not-determined  | Genome-fragment | NA    | 0     |
| S12-final-viral-combined_k141_7038   | 3696  | No  | NA    | 0  | 1 | Not-determined  | Genome-fragment | NA    | 0     |
| S12-final-viral-combined_k141_174546 | 1674  | No  | NA    | 0  | 0 | Not-determined  | Genome-fragment | NA    | 0     |
| S6-final-viral-combined_k141_122527  | 2789  | No  | NA    | 0  | 1 | Low-quality     | Genome-fragment | 1.34  | 0     |
| S9-final-viral-combined_k141_50415   | 2790  | No  | NA    | 0  | 0 | Low-quality     | Genome-fragment | 3.01  | 0     |
| S5-final-viral-combined_k141_186501  | 2791  | Yes | 2088  | 1  | 1 | Low-quality     | Genome-fragment | 1.31  | 25.19 |
| S12-final-viral-combined_k141_25693  | 2333  | No  | NA    | 0  | 1 | Not-determined  | Genome-fragment | NA    | 0     |
| S12-final-viral-combined_k141_7053   | 4275  | No  | NA    | 0  | 2 | Not-determined  | Genome-fragment | NA    | 0     |
| S7-final-viral-combined_k141_62438   | 2791  | No  | NA    | 0  | 3 | Low-quality     | Genome-fragment | 2.28  | 0     |
| S12-final-viral-combined_k141_157626 | 2791  | No  | NA    | 0  | 2 | Low-quality     | Genome-fragment | 1.94  | 0     |
| S12-final-viral-combined_k141_27530  | 2812  | No  | NA    | 0  | 0 | Not-determined  | Genome-fragment | NA    | 0     |
| S12-final-viral-combined_k141_56986  | 2360  | No  | NA    | 0  | 2 | Not-determined  | Genome-fragment | NA    | 0     |
| S12-final-viral-combined_k141_375876 | 1866  | No  | NA    | 0  | 0 | Not-determined  | Genome-fragment | NA    | 0     |
| S12-final-viral-combined_k141_309562 | 7746  | No  | NA    | 0  | 2 | Not-determined  | Genome-fragment | NA    | 0     |
| S12-final-viral-combined_k141_292370 | 1758  | No  | NA    | 0  | 0 | Not-determined  | Genome-fragment | NA    | 0     |
| S12-final-viral-combined_k141_7068   | 4083  | No  | NA    | 0  | 2 | Not-determined  | Genome-fragment | NA    | 0     |
| S12-final-viral-combined_k141_158485 | 1676  | No  | NA    | 0  | 2 | Not-determined  | Genome-fragment | NA    | 0     |
| S12-final-viral-combined_k141_391657 | 1517  | No  | NA    | 0  | 1 | Not-determined  | Genome-fragment | NA    | 0     |
| S5-final-viral-combined_k141_117729  | 2792  | No  | NA    | 0  | 0 | Low-quality     | Genome-fragment | 6.64  | 0     |
| S12-final-viral-combined_k141_341576 | 2166  | No  | NA    | 0  | 3 | Not-determined  | Genome-fragment | NA    | 0     |
| S12-final-viral-combined_k141_375911 | 1416  | No  | NA    | 0  | 0 | Not-determined  | Genome-fragment | NA    | 0     |
| S12-final-viral-combined_k141_292405 | 2842  | No  | NA    | 0  | 0 | Not-determined  | Genome-fragment | NA    | 0     |
| S17-k141_241280                      | 2792  | No  | NA    | 0  | 2 | Low-quality     | Genome-fragment | 3.66  | 0     |
| S12-final-viral-combined_k141_341578 | 6019  | No  | NA    | 0  | 0 | Genome-fragment | Genome-fragment | NA    | 4.58  |
| S12-final-viral-combined_k141_84630  | 2792  | No  | NA    | 0  | 0 | Low-quality     | Genome-fragment | 56.12 | 0     |
| S12-final-viral-combined_k141_41160  | 22653 | No  | NA    | 8  | 1 | Medium-quality  | Genome-fragment | 2.49  | 0     |
| S17-final-viral-combined_k141_142809 | 2793  | No  | NA    | 0  | 0 | Low-quality     | Genome-fragment | NA    | 0     |
| S12-final-viral-combined_k141_325781 | 4099  | No  | NA    | 0  | 1 | Not-determined  | Genome-fragment | NA    | 0     |
| S12-final-viral-combined_k141_341368 | 2271  | No  | NA    | 0  | 1 | Not-determined  | Genome-fragment | NA    | 0     |
| S12-final-viral-combined_k141_341629 | 1788  | No  | NA    | 0  | 0 | Not-determined  | Genome-fragment | NA    | 0     |
| S12-final-viral-combined_k141_444351 | 2793  | No  | NA    | 0  | 1 | Low-quality     | Genome-fragment | 3.48  | 0     |
| S11-final-viral-combined_k141_256995 | 2794  | No  | NA    | 2  | 0 | Low-quality     | Genome-fragment | 3.39  | 0     |
| S12-final-viral-combined_k141_71741  | 25484 | No  | NA    | 18 | 0 | Medium-quality  | Genome-fragment | 53.42 | 0     |
| S12-final-viral-combined_k141_209621 | 3094  | No  | NA    | 0  | 1 | Not-determined  | Genome-fragment | NA    | 0     |
| S12-final-viral-combined_k141_192314 | 9097  | No  | NA    | 0  | 6 | Not-determined  | Genome-fragment | NA    | 0     |
| S12-final-viral-combined_k141_225052 | 6903  | No  | NA    | 0  | 3 | Not-determined  | Genome-fragment | NA    | 18.09 |
| S12-final-viral-combined_k141_366627 | 2794  | No  | NA    | 0  | 0 | Low-quality     | Genome-fragment | NA    | 0     |
| S12-final-viral-combined_k141_291486 | 4123  | No  | NA    | 0  | 1 | Not-determined  | Genome-fragment | NA    | 0     |
| S12-final-viral-combined_k141_174714 | 1892  | No  | NA    | 0  | 0 | Not-determined  | Genome-fragment | NA    | 0     |
| S12-final-viral-combined_k141_274716 | 1501  | No  | NA    | 0  | 0 | Not-determined  | Genome-fragment | NA    | 7.46  |
| S7-final-viral-combined_k141_427616  | 1844  | No  | NA    | 0  | 0 | Low-quality     | Genome-fragment | NA    | 0     |
| S12-final-viral-combined_k141_90819  | 1368  | No  | NA    | 0  | 1 | Not-determined  | Genome-fragment | NA    | 0     |
| S12-final-viral-combined_k141_131772 | 2794  | No  | NA    | 0  | 0 | Low-quality     | Genome-fragment | 1.59  | 0     |
| S8-final-viral-combined_k141_208148  | 2794  | Yes | 1876  | 1  | 1 | Low-quality     | Genome-fragment | 4.27  | 32.86 |
| S9-final-viral-combined_k141_115184  | 2795  | No  | NA    | 5  | 0 | Low-quality     | Genome-fragment | 6.04  | 0     |
| S12-final-viral-combined_k141_242541 | 1596  | No  | NA    | 0  | 1 | Not-determined  | Genome-fragment | NA    | 0     |
| S1-final-viral-combined_k141_15076   | 2795  | No  | NA    | 3  | 0 | Low-quality     | Genome-fragment | 4.43  | 0     |
| S12-final-viral-combined_k141_376008 | 1237  | No  | NA    | 0  | 1 | Not-determined  | Genome-fragment | NA    | 0     |
| S12-final-viral-combined_k141_225092 | 2468  | No  | NA    | 0  | 0 | Not-determined  | Genome-fragment | NA    | 0     |
| S12-final-viral-combined_k141_358010 | 57083 | Yes | 52856 | 11 | 4 | High-quality    | High-quality    | 100   | 7.41  |
| S12-final-viral-combined_k141_159181 | 2796  | No  | NA    | 0  | 2 | Low-quality     | Genome-fragment | 6.56  | 0     |
| S12-final-viral-combined_k141_341757 | 3191  | No  | NA    | 0  | 2 | Not-determined  | Genome-fragment | NA    | 0     |
| S12-final-viral-combined_k141_13176  | 2796  | No  | NA    | 0  | 3 | Low-quality     | Genome-fragment | 0.74  | 0     |
| S6-final-viral-combined_k141_140348  | 2796  | No  | NA    | 0  | 1 | Low-quality     | Genome-fragment | 5.34  | 0     |
| S11-final-viral-combined_k141_48556  | 2797  | No  | NA    | 2  | 0 | Low-quality     | Genome-fragment | 6.96  | 0     |
| S4_k141_32645                        | 2797  | No  | NA    | 0  | 0 | Low-quality     | Genome-fragment | 5.86  | 0     |
| S12-final-viral-combined_k141_392791 | 4568  | No  | NA    | 0  | 0 | Not-determined  | Genome-fragment | NA    | 0     |
| S12-final-viral-combined_k141_225176 | 1833  | No  | NA    | 0  | 1 | Not-determined  | Genome-fragment | NA    | 0     |
| S12-final-viral-combined_k141_90895  | 3508  | No  | NA    | 0  | 1 | Not-determined  | Genome-fragment | NA    | 0     |
| S11-final-viral-combined_k141_119510 | 2798  | No  | NA    | 3  | 0 | Low-quality     | Genome-fragment | 3.61  | 0     |
| S12-final-viral-combined_k141_285138 | 2798  | No  | NA    | 0  | 1 | Low-quality     | Genome-fragment | NA    | 7.4   |
| S12-final-viral-combined_k141_57237  | 2031  | No  | NA    | 0  | 1 | Not-determined  | Genome-fragment | NA    | 0     |
| S12-final-viral-combined_k141_210901 | 2798  | No  | NA    | 0  | 0 | Low-quality     | Genome-fragment | 3.37  | 0     |
| S12-final-viral-combined_k141_141590 | 1009  | No  | NA    | 0  | 1 | Not-determined  | Genome-fragment | NA    | 0     |
| S12-final-viral-combined_k141_141602 | 2719  | No  | NA    | 0  | 2 | Not-determined  | Genome-fragment | NA    | 0     |
| S12-final-viral-combined_k141_214163 | 2798  | No  | NA    | 1  | 0 | Low-quality     | Genome-fragment | 6.62  | 0     |
| S12-final-viral-combined_k141_7137   | 2414  | No  | NA    | 0  | 1 |                 |                 |       |       |



|                                      |          |       |     |       |    |   |                |                 |       |       |
|--------------------------------------|----------|-------|-----|-------|----|---|----------------|-----------------|-------|-------|
| S17-final-viral-combined_k141_16830  | [full]   | 2805  | No  | NA    | 0  | 0 | Low-quality    | Genome-fragment | 6.8   | 0     |
| S12-final-viral-combined_k141_276272 | [full]   | 1214  | No  | NA    | 0  | 1 | Not-determined | Genome-fragment | NA    | 0     |
| S12-final-viral-combined_k141_75716  | [full]   | 2394  | No  | NA    | 0  | 1 | Not-determined | Genome-fragment | NA    | 0     |
| S2-final-viral-combined_k141_10633   | [full]   | 2805  | No  | NA    | 0  | 0 | Low-quality    | Genome-fragment | 4.26  | 0     |
| S12-final-viral-combined_k141_242218 | [full]   | 1172  | No  | NA    | 0  | 1 | Not-determined | Genome-fragment | NA    | 0     |
| S12-final-viral-combined_k141_41530  | [full]   | 1431  | No  | NA    | 0  | 2 | Not-determined | Genome-fragment | NA    | 0     |
| S12-final-viral-combined_k141_75191  | [full]   | 4143  | No  | NA    | 0  | 4 | Not-determined | Genome-fragment | NA    | 0     |
| S12-final-viral-combined_k141_22537  | [full]   | 5267  | No  | NA    | 0  | 4 | Not-determined | Genome-fragment | NA    | 0     |
| S12-final-viral-combined_k141_7666   | [full]   | 1664  | No  | NA    | 0  | 2 | Not-determined | Genome-fragment | NA    | 0     |
| S11-final-viral-combined_k141_17662  | [full]   | 2806  | No  | NA    | 0  | 0 | Low-quality    | Genome-fragment | 1.8   | 0     |
| S12-final-viral-combined_k141_7668   | [full]   | 2085  | No  | NA    | 0  | 1 | Not-determined | Genome-fragment | NA    | 0     |
| S11_k141_289779                      |          | 2806  | No  | NA    | 0  | 0 | Low-quality    | Genome-fragment | 6.44  | 0     |
| S12-final-viral-combined_k141_24521  | [full]   | 1621  | No  | NA    | 0  | 0 | Not-determined | Genome-fragment | NA    | 0     |
| S12-final-viral-combined_k141_342095 | [full]   | 2947  | No  | NA    | 0  | 3 | Not-determined | Genome-fragment | NA    | 0     |
| S12-final-viral-combined_k141_242274 | [full]   | 2029  | No  | NA    | 0  | 1 | Not-determined | Genome-fragment | NA    | 0     |
| S7-final-viral-combined_k141_78001   | [full]   | 2806  | No  | NA    | 0  | 1 | Low-quality    | Genome-fragment | 2.25  | 0     |
| S2-final-viral-combined_k141_163935  | [full]   | 2806  | No  | NA    | 2  | 0 | Low-quality    | Genome-fragment | 6.47  | 0     |
| S4-final-viral-combined_k141_6281    | [full]   | 2806  | No  | NA    | 0  | 1 | Low-quality    | Genome-fragment | 0.82  | 0     |
| S12-final-viral-combined_k141_242134 | [full]   | 1057  | No  | NA    | 0  | 2 | Not-determined | Genome-fragment | NA    | 0     |
| S2-final-viral-combined_k141_44026   | [full]   | 2807  | No  | NA    | 0  | 3 | Low-quality    | Genome-fragment | 4.77  | 0     |
| S8-final-viral-combined_k141_216926  | [full]   | 2807  | No  | NA    | 0  | 0 | Low-quality    | Genome-fragment | 7.33  | 0     |
| S1-final-viral-combined_k141_246687  | [full]   | 2808  | No  | NA    | 2  | 0 | Low-quality    | Genome-fragment | 7.43  | 0     |
| S12-final-viral-combined_k141_7722   | [full]   | 2434  | No  | NA    | 0  | 2 | Not-determined | Genome-fragment | NA    | 0     |
| S5-final-viral-combined_k141_80100   | [full]   | 2808  | No  | NA    | 0  | 0 | Low-quality    | Genome-fragment | 9.71  | 0     |
| S12-final-viral-combined_k141_258269 | [full]   | 5159  | No  | NA    | 0  | 0 | Not-determined | Genome-fragment | NA    | 0     |
| S12-final-viral-combined_k141_158878 | [full]   | 3045  | No  | NA    | 0  | 1 | Not-determined | Genome-fragment | NA    | 0     |
| S6-final-viral-combined_k141_42814   | [full]   | 2808  | No  | NA    | 0  | 2 | Low-quality    | Genome-fragment | 2.84  | 0     |
| S11-final-viral-combined_k141_326657 | [full]   | 2809  | No  | NA    | 0  | 3 | Low-quality    | Genome-fragment | 3.29  | 0     |
| S1_k141_242389                       |          | 2809  | No  | NA    | 0  | 1 | Low-quality    | Genome-fragment | 2.53  | 0     |
| S12-final-viral-combined_k141_24590  | [full]   | 1946  | No  | NA    | 0  | 1 | Not-determined | Genome-fragment | NA    | 0     |
| S3-final-viral-combined_k141_28261   | [full]   | 2809  | No  | NA    | 0  | 0 | Low-quality    | Genome-fragment | 3.18  | 0     |
| S12-final-viral-combined_k141_358291 | [full]   | 2470  | No  | NA    | 0  | 2 | Not-determined | Genome-fragment | NA    | 0     |
| S12-final-viral-combined_k141_158892 | [full]   | 2691  | No  | NA    | 0  | 1 | Not-determined | Genome-fragment | NA    | 0     |
| S12-final-viral-combined_k141_91175  | [full]   | 3242  | No  | NA    | 0  | 3 | Not-determined | Genome-fragment | NA    | 0     |
| S2-final-viral-combined_k141_18315   | [full]   | 2809  | No  | NA    | 1  | 0 | Low-quality    | Genome-fragment | 5.91  | 0     |
| S8-final-viral-combined_k141_232121  | [full]   | 2809  | No  | NA    | 0  | 1 | Low-quality    | Genome-fragment | 2.16  | 0     |
| S12-final-viral-combined_k141_358315 | [full]   | 4855  | No  | NA    | 0  | 2 | Not-determined | Genome-fragment | NA    | 0     |
| S3-final-viral-combined_k141_16369   | [full]   | 2810  | No  | NA    | 0  | 0 | Low-quality    | Genome-fragment | 6.04  | 0     |
| S5-final-viral-combined_k141_71638   | [full]   | 2810  | No  | NA    | 0  | 1 | Low-quality    | Genome-fragment | 7.41  | 0     |
| S5-final-viral-combined_k141_171584  | [full]   | 2810  | No  | NA    | 3  | 0 | Low-quality    | Genome-fragment | 6.66  | 0     |
| S12-final-viral-combined_k141_7773   | [full]   | 1011  | No  | NA    | 0  | 0 | Not-determined | Genome-fragment | NA    | 0     |
| S12-final-viral-combined_k141_75151  | [full]   | 1241  | No  | NA    | 0  | 0 | Not-determined | Genome-fragment | NA    | 0     |
| S5-final-viral-combined_k141_80700   | [full]   | 2811  | No  | NA    | 0  | 1 | Low-quality    | Genome-fragment | 1.28  | 0     |
| S12-final-viral-combined_k141_111170 | [full]   | 2811  | No  | NA    | 1  | 0 | Low-quality    | Genome-fragment | 2.01  | 0     |
| S12-final-viral-combined_k141_258318 | [full]   | 2632  | No  | NA    | 0  | 2 | Not-determined | Genome-fragment | NA    | 0     |
| S1_k141_216384                       |          | 2812  | No  | NA    | 2  | 0 | Low-quality    | Genome-fragment | 6.55  | 0     |
| S12-final-viral-combined_k141_75367  | [full]   | 4911  | No  | NA    | 0  | 2 | Not-determined | Genome-fragment | NA    | 0     |
| S12-final-viral-combined_k141_276054 | [full]   | 1196  | No  | NA    | 0  | 0 | Not-determined | Genome-fragment | NA    | 0     |
| S12-final-viral-combined_k141_753791 | [full]   | 1042  | No  | NA    | 0  | 0 | Not-determined | Genome-fragment | NA    | 0     |
| S5-final-viral-combined_k141_1537    | [full]   | 2812  | No  | NA    | 0  | 1 | Low-quality    | Genome-fragment | 6.5   | 0     |
| S12-final-viral-combined_k141_41697  | [full]   | 3943  | No  | NA    | 0  | 1 | Not-determined | Genome-fragment | NA    | 0     |
| S12-final-viral-combined_k141_24666  | [full]   | 2714  | No  | NA    | 0  | 0 | Low-quality    | Genome-fragment | NA    | 0     |
| S12-final-viral-combined_k141_376326 | [full]   | 46498 | No  | NA    | 21 | 0 | Medium-quality | Genome-fragment | 78.92 | 0     |
| S12-final-viral-combined_k141_142052 | [full]   | 1350  | No  | NA    | 0  | 0 | Not-determined | Genome-fragment | NA    | 0     |
| S7-final-viral-combined_k141_136607  | [full]   | 2812  | No  | NA    | 0  | 0 | Low-quality    | Genome-fragment | 3.51  | 0     |
| S17_k141_3095                        |          | 2812  | No  | NA    | 0  | 1 | Low-quality    | Genome-fragment | 4.81  | 0     |
| S12-final-viral-combined_k141_376348 | [full]   | 1980  | No  | NA    | 0  | 0 | Not-determined | Genome-fragment | NA    | 0     |
| S12-final-viral-combined_k141_242083 | [full]   | 2432  | No  | NA    | 0  | 0 | Not-determined | Genome-fragment | NA    | 0     |
| S12-final-viral-combined_k141_912311 | [full]   | 48609 | No  | NA    | 0  | 1 | Medium-quality | Genome-fragment | 78.28 | 0     |
| S12-final-viral-combined_k141_137370 | [full]   | 2812  | No  | NA    | 0  | 1 | Low-quality    | Genome-fragment | 5.98  | 0     |
| S12-final-viral-combined_k141_127543 | [full]   | 2812  | No  | NA    | 0  | 1 | Low-quality    | Genome-fragment | 2.68  | 0     |
| S12-final-viral-combined_k141_107942 | [full]   | 30800 | No  | NA    | 23 | 0 | Medium-quality | Genome-fragment | 51.21 | 0     |
| S12-final-viral-combined_k141_159015 | [full]   | 7414  | No  | NA    | 0  | 7 | Not-determined | Genome-fragment | NA    | 0     |
| S12-final-viral-combined_k141_297529 | [full]   | 2812  | No  | NA    | 0  | 1 | Low-quality    | Genome-fragment | 3.32  | 0     |
| S6-final-viral-combined_k141_1258    | [full]   | 2813  | No  | NA    | 0  | 1 | Low-quality    | Genome-fragment | 1.76  | 0     |
| S12-final-viral-combined_k141_293286 | [full]   | 1493  | No  | NA    | 0  | 1 | Not-determined | Genome-fragment | NA    | 0     |
| S12-final-viral-combined_k141_393277 | [full]   | 6529  | No  | NA    | 0  | 1 | Not-determined | Genome-fragment | NA    | 0     |
| S12-final-viral-combined_k141_393282 | [full]   | 1135  | No  | NA    | 0  | 1 | Not-determined | Genome-fragment | NA    | 0     |
| S12-final-viral-combined_k141_37637  | [full]   | 6214  | No  | NA    | 0  | 2 | Not-determined | Genome-fragment | NA    | 0     |
| S12-final-viral-combined_k141_366161 | [full]   | 2814  | No  | NA    | 0  | 1 | Low-quality    | Genome-fragment | 6.5   | 0     |
| S8-final-viral-combined_k141_6397    | [full]   | 2814  | No  | NA    | 0  | 1 | Low-quality    | Genome-fragment | 0.9   | 0     |
| S12-final-viral-combined_k141_19397  | [full]   | 2417  | No  | NA    | 0  | 1 | Not-determined | Genome-fragment | NA    | 0     |
| S9-final-viral-combined_k141_65678   | [full]   | 2815  | No  | NA    | 1  | 0 | Low-quality    | Genome-fragment | 5.47  | 0     |
| S11-final-viral-combined_k141_163285 | [full]   | 2815  | No  | NA    | 0  | 2 | Low-quality    | Genome-fragment | 1.29  | 0     |
| S12-final-viral-combined_k141_193201 | [full]   | 1576  | No  | NA    | 0  | 1 | Not-determined | Genome-fragment | NA    | 0     |
| S12-final-viral-combined_k141_91284  | [full]   | 1703  | No  | NA    | 0  | 1 | Not-determined | Genome-fragment | NA    | 0     |
| S11-final-viral-combined_k141_287534 | [full]   | 2815  | No  | NA    | 2  | 0 | Low-quality    | Genome-fragment | 4.44  | 0     |
| S4-final-viral-combined_k141_291219  | [full]   | 2815  | No  | NA    | 0  | 1 | Low-quality    | Genome-fragment | 3.82  | 0     |
| S17-final-viral-combined_k141_134948 | [full]   | 2815  | No  | NA    | 0  | 1 | Low-quality    | Genome-fragment | 0.24  | 0     |
| S12-final-viral-combined_k141_124392 | [full]   | 4736  | No  | NA    | 0  | 0 | Not-determined | Genome-fragment | NA    | 0     |
| S12_k141_274512                      |          | 2815  | No  | NA    | 3  | 0 | Low-quality    | Genome-fragment | 7.51  | 0     |
| S12-final-viral-combined_k141_75502  | [full]   | 2150  | No  | NA    | 0  | 0 | Not-determined | Genome-fragment | NA    | 0     |
| S9-final-viral-combined_k141_70318   | [full]   | 2816  | No  | NA    | 1  | 0 | Low-quality    | Genome-fragment | 5.26  | 0     |
| S1-final-viral-combined_k141_382632  | [full]   | 2816  | No  | NA    | 0  | 1 | Low-quality    | Genome-fragment | 1.79  | 0     |
| S12-final-viral-combined_k141_276321 | [full]   | 1891  | No  | NA    | 0  | 1 | Not-determined | Genome-fragment | NA    | 0     |
| S17-final-viral-combined_k141_163742 | [full]   | 2816  | No  | NA    | 0  | 0 | Low-quality    | Genome-fragment | 49.73 | 0     |
| S12-final-viral-combined_k141_392609 | [full]   | 2816  | No  | NA    | 0  | 2 | Low-quality    | Genome-fragment | 3.41  | 0     |
| S12-final-viral-combined_k141_276263 | [full]   | 1705  | No  | NA    | 0  | 1 | Not-determined | Genome-fragment | NA    | 0     |
| S12-final-viral-combined_k141_347430 | [full]   | 4522  | No  | NA    | 0  | 1 | Not-determined | Genome-fragment | NA    | 0     |
| S11-final-viral-combined_k141_126093 | [full]   | 2817  | No  | NA    | 0  | 0 | Low-quality    | Genome-fragment | 6.18  | 0     |
| S1_k141_165445                       |          | 2817  | No  | NA    | 0  | 1 | Low-quality    | Genome-fragment | 6.07  | 0     |
| S12-final-viral-combined_k141_225838 | [full]   | 3298  | No  | NA    | 0  | 1 | Not-determined | Genome-fragment | NA    | 0     |
| S12-final-viral-combined_k141_376483 | [full]   | 2259  | No  | NA    | 0  | 0 | Not-determined | Genome-fragment | NA    | 0     |
| S12-final-viral-combined_k141_124442 | [full]   | 1954  | No  | NA    | 0  | 2 | Not-determined | Genome-fragment | NA    | 0     |
| S1_k141_355195                       |          | 2817  | No  | NA    | 1  | 0 | Low-quality    | Genome-fragment | 3.8   | 0     |
| S12-final-viral-combined_k141_342471 | [full]   | 3078  | No  | NA    | 0  | 3 | Not-determined | Genome-fragment | NA    | 0     |
| S12-final-viral-combined_k141_276295 | [full]   | 24242 | No  | NA    | 0  | 7 | Not-determined | Genome-fragment | NA    | 0     |
| S5-final-viral-combined_k141_19037   | [full]   | 2817  | No  | NA    | 0  | 0 | Low-quality    | Genome-fragment | 2.14  | 0     |
| S12-final-viral-combined_k141_29134  | [full]   | 40065 | Yes | 37843 | 13 | 0 | Medium-quality | Genome-fragment | 74.45 | 5.5   |
| S12-final-viral-combined_k141_376497 | [full]   | 9149  | No  | NA    | 0  | 2 | Not-determined | Genome-fragment | NA    | 0     |
| S17-final-viral-combined_k141_223560 | [full]   | 2817  | No  | NA    | 0  | 1 | Low-quality    | Genome-fragment | 1.42  | 0     |
| S12-final-viral-combined_k141_249161 | [full]   | 1802  | No  | NA    | 0  | 0 | Not-determined | Genome-fragment | NA    | 0     |
| S12-final-viral-combined_k141_259057 | [full]   | 3555  | No  | NA    | 0  | 1 | Not-determined | Genome-fragment | NA    | 0     |
| S17-final-viral-combined_k141_49379  | [full]   | 2817  | Yes | 1134  | 1  | 1 | Low-quality    | Genome-fragment | 22.13 | 59.74 |
| S12-final-viral-combined_k141_23636  | [full]   | 1220  | No  | NA    | 0  | 1 | Not-determined | Genome-fragment | NA    | 0     |
| S12-final-viral-combined_k141_142256 | [full]   | 1320  | No  | NA    | 0  | 0 | Not-determined | Genome-fragment | NA    | 0     |
| S1-final-viral-combined_k141_362745  | [H2gene] | 2818  | No  | NA    | 1  | 0 | Low-quality    | Genome-fragment | 5.84  | 0     |
| S17-final-viral-combined_k141_169246 | [full]   | 2818  | No  | NA    | 0  | 1 | Low-quality    | Genome-fragment | 2.96  | 0     |
| S17-final-viral-combined_k141_321771 | [full]   | 2818  | No  | NA    | 0  | 0 | Low-quality    | Genome-fragment | 0.24  | 0     |
| S12-final-viral-combined_k141_242557 | [full]   | 1022  | No  | NA    | 0  | 0 | Not-determined | Genome-fragment | NA    | 0     |
| S17-final-viral-combined_k141_105471 | [H2gene] | 2818  | No  | NA    | 1  | 0 | Low-quality    | Genome-fragment | 4.67  | 0     |
| S12-final-viral-combined_k141_347521 | [full]   | 1259  | No  | NA    | 0  | 1 | Not-determined | Genome-fragment | NA    | 0     |
| S11-final-viral-combined_k141_129834 | [full]   | 2819  | No  | NA    | 0  | 1 | Low-quality    | Genome-fragment | 5.04  | 0     |
| S12-final-viral-combined_k141_108149 | [full]   | 2888  | No  | NA    | 0  | 3 | Not-determined | Genome-fragment | NA    | 0     |
| S12-final-viral-combined_k141_57958  | [full]   | 2151  | No  | NA    | 0  | 0 | Not-determined | Genome-fragment | NA    | 0     |
| S12-final-viral-combined_k141_142273 | [full]   | 1913  | No  | NA    | 0  | 0 | Not-determined | Genome-fragment | NA    | 0     |
| S12-final-viral-combined_k141_193271 | [full]   | 1483  | No  | NA    | 0  | 1 | Not-determined | Genome-fragment | NA    | 0     |
| S12-final-viral-combined_k141_342557 | [full]   | 1940  | No  | NA    | 0  | 1 | Not-determined | Genome-fragment | NA    | 0     |
| S12-final-viral-combined_k141_358560 | [full]   | 2441  | No  | NA    | 0  | 0 | Not-determined | Genome-fragment | NA    | 0     |
| S11-final-viral-combined_k141_20658  | [full]   | 2819  | No  | NA    | 1  | 0 | Low-quality    | Genome-fragment | 6.79  | 0     |
| S8-final-viral-combined_k141_43443   | [full]   | 2820  | No  | NA    | 1  | 0 | Low-quality    | Genome-fragment | 6.68  | 0     |
| S2-final-viral-combined_k141_110475  | [full]   | 2820  | No  | NA    | 0  | 1 | Low-quality    | Genome-fragment | 5.43  | 0     |
| S12-final-viral-combined_k141_276398 | [full]   | 1941  | No  | NA    | 0  | 0 | Not-determined | Genome-fragment | NA    | 0     |
| S12-final-viral-combined_k141_242616 | [full]   | 1045  | No  | NA    | 0  | 1 | Not-determined | Genome-fragment | NA    | 0     |
| S12-final-viral-combined_k141_21651  | [full]   | 2707  | No  | NA    | 0  | 3 | Not-determined | Genome-fragment | NA    | 0     |
| S12-final-viral-combined_k141_208881 | [full]   | 5803  | No  | NA    | 0  | 5 | Not-determined | Genome-fragment | NA    | 0     |
| S12-final-viral-combined_k141_342581 | [full]   | 2099  | No  | NA    | 0  | 0 | Not-determined | Genome-fragment | NA    | 0     |
| S8_k141_102398                       |          | 2820  | No  | NA    | 0  | 2 | Low-quality    | Genome-fragment | 4.76  | 0     |
| S11-final-viral-combined_k141_113904 | [full]   | 2821  | No  | NA    | 1  | 0 | Low-quality    |                 |       |       |



|                                      |        |       |     |       |      |    |                |                 |       |       |
|--------------------------------------|--------|-------|-----|-------|------|----|----------------|-----------------|-------|-------|
| S11-final-viral-combined_k141_284601 | [full] | 2830  | No  | NA    | 0    | 2  | Low-quality    | Genome-fragment | 0.43  | 0     |
| S12-final-viral-combined_k141_276821 | [full] | 22185 | No  | NA    | 0    | 1  | Not-determined | Genome-fragment | NA    | 0     |
| S12-final-viral-combined_k141_108375 | [full] | 2955  | No  | NA    | 0    | 2  | Not-determined | Genome-fragment | NA    | 0     |
| S1-final-viral-combined_k141_217082  | [full] | 2830  | No  | NA    | 2    | 0  | Low-quality    | Genome-fragment | 4.65  | 0     |
| S12-final-viral-combined_k141_75733  | [full] | 5432  | No  | NA    | 1    | 0  | High-quality   | High-quality    | 98.25 | 0     |
| S12-final-viral-combined_k141_320765 | [full] | 3879  | No  | NA    | 0    | 1  | Not-determined | Genome-fragment | NA    | 0     |
| S4_k141_23138                        |        | 2830  | No  | NA    | 0    | 0  | Low-quality    | Genome-fragment | 17.09 | 0     |
| S12-final-viral-combined_k141_276607 | [full] | 1442  | No  | NA    | 0    | 1  | Not-determined | Genome-fragment | NA    | 0     |
| S12-final-viral-combined_k141_124792 | [full] | 1749  | No  | NA    | 0    | 1  | Not-determined | Genome-fragment | NA    | 0     |
| S12-final-viral-combined_k141_326784 | [full] | 2508  | No  | NA    | 0    | 0  | Not-determined | Genome-fragment | NA    | 0     |
| S12-final-viral-combined_k141_175610 | [full] | 5266  | No  | NA    | 0    | 2  | Not-determined | Genome-fragment | NA    | 0     |
| S12-final-viral-combined_k141_58247  | [full] | 6679  | No  | NA    | 3    | 0  | Not-determined | Genome-fragment | NA    | 0     |
| S6-final-viral-combined_k141_74882   | [full] | 2830  | No  | NA    | 2    | 0  | Low-quality    | Genome-fragment | 10.3  | 0     |
| S12-final-viral-combined_k141_276628 | [full] | 2928  | No  | NA    | 0    | 1  | Not-determined | Genome-fragment | NA    | 0     |
| S12-final-viral-combined_k141_155339 | [full] | 2388  | No  | NA    | 0    | 0  | Not-determined | Genome-fragment | NA    | 0     |
| S8-final-viral-combined_k141_218661  | [full] | 2830  | No  | NA    | 0    | 1  | Low-quality    | Genome-fragment | 3.63  | 0     |
| S12-final-viral-combined_k141_259320 | [full] | 1786  | No  | NA    | 0    | 0  | Not-determined | Genome-fragment | NA    | 0     |
| S8_k141_26665                        |        | 2831  | No  | NA    | 1    | 0  | Low-quality    | Genome-fragment | 2.39  | 0     |
| S12-final-viral-combined_k141_293703 | [full] | 11812 | No  | NA    | 1    | 2  | High-quality   | High-quality    | 100   | 0     |
| S12-final-viral-combined_k141_226239 | [full] | 1433  | No  | NA    | 0    | 1  | Not-determined | Genome-fragment | NA    | 0     |
| S12-final-viral-combined_k141_259346 | [full] | 1359  | No  | NA    | 0    | 0  | Not-determined | Genome-fragment | NA    | 0     |
| S11-final-viral-combined_k141_160703 | [full] | 2832  | No  | NA    | 0    | 0  | Low-quality    | Genome-fragment | 6.37  | 0     |
| S1_k141_84197                        |        | 2832  | No  | NA    | 1    | 0  | Low-quality    | Genome-fragment | 6     | 0     |
| S12-final-viral-combined_k141_242798 | [full] | 3762  | No  | NA    | 0    | 2  | Not-determined | Genome-fragment | NA    | 0     |
| S12-final-viral-combined_k141_259388 | [full] | 1506  | No  | NA    | 0    | 1  | Not-determined | Genome-fragment | NA    | 0     |
| S12-final-viral-combined_k141_108486 | [full] | 5617  | No  | NA    | 0    | 3  | Not-determined | Genome-fragment | NA    | 0     |
| S12-final-viral-combined_k141_58319  | [full] | 3732  | No  | NA    | 0    | 0  | Not-determined | Genome-fragment | NA    | 0     |
| S12-final-viral-combined_k141_376807 | [full] | 1264  | No  | NA    | 0    | 0  | Not-determined | Genome-fragment | NA    | 0     |
| S7-final-viral-combined_k141_403213  | [full] | 2812  | Yes |       | 1782 | 1  | Low-quality    | Genome-fragment | 1.26  | 37.08 |
| S12-final-viral-combined_k141_358797 | [full] | 41816 | Yes | 27363 | 9    | 14 | Medium-quality | Genome-fragment | 56.81 | 34.56 |
| S12-final-viral-combined_k141_91698  | [full] | 4318  | No  | NA    | 0    | 2  | Not-determined | Genome-fragment | NA    | 0     |
| S4_k141_27668                        |        | 2832  | No  | NA    | 0    | 0  | Low-quality    | Genome-fragment | 5.09  | 0     |
| S12-final-viral-combined_k141_208921 | [full] | 2833  | No  | NA    | 0    | 1  | Low-quality    | Genome-fragment | 3.5   | 0     |
| S12-final-viral-combined_k141_423761 | [full] | 2466  | No  | NA    | 0    | 3  | Not-determined | Genome-fragment | NA    | 0     |
| S12-final-viral-combined_k141_226356 | [full] | 3408  | No  | NA    | 0    | 2  | Not-determined | Genome-fragment | NA    | 0     |
| S11-final-viral-combined_k141_107884 | [full] | 2814  | No  | NA    | 0    | 1  | Low-quality    | Genome-fragment | 1.01  | 0     |
| S12-final-viral-combined_k141_242912 | [full] | 3295  | No  | NA    | 0    | 0  | Not-determined | Genome-fragment | NA    | 0     |
| S7-final-viral-combined_k141_199801  | [full] | 2814  | No  | NA    | 0    | 1  | Low-quality    | Genome-fragment | 5.23  | 0     |
| S12-final-viral-combined_k141_124966 | [full] | 3535  | No  | NA    | 0    | 1  | Not-determined | Genome-fragment | NA    | 0     |
| S2-final-viral-combined_k141_86823   | [full] | 2834  | No  | NA    | 0    | 1  | Low-quality    | Genome-fragment | 0.94  | 0     |
| S12-final-viral-combined_k141_276734 | [full] | 1267  | No  | NA    | 0    | 1  | Not-determined | Genome-fragment | NA    | 0     |
| S12-final-viral-combined_k141_242952 | [full] | 1008  | No  | NA    | 0    | 0  | Not-determined | Genome-fragment | NA    | 0     |
| S8_k141_132391                       |        | 2834  | No  | NA    | 3    | 0  | Low-quality    | Genome-fragment | 4.59  | 0     |
| S11-final-viral-combined_k141_263184 | [full] | 2835  | No  | NA    | 2    | 0  | Low-quality    | Genome-fragment | 6.2   | 0     |
| S12-final-viral-combined_k141_376885 | [full] | 1724  | No  | NA    | 0    | 2  | Not-determined | Genome-fragment | NA    | 0     |
| S12-final-viral-combined_k141_293892 | [full] | 2036  | No  | NA    | 0    | 3  | Not-determined | Genome-fragment | NA    | 0     |
| S11-final-viral-combined_k141_205862 | [full] | 2835  | No  | NA    | 0    | 2  | Low-quality    | Genome-fragment | 2.61  | 0     |
| S2-final-viral-combined_k141_197947  | [full] | 2835  | No  | NA    | 0    | 0  | Low-quality    | Genome-fragment | 5.14  | 0     |
| S12-final-viral-combined_k141_125006 | [full] | 2047  | No  | NA    | 0    | 0  | Not-determined | Genome-fragment | NA    | 0     |
| S2-final-viral-combined_k141_182771  | [full] | 2835  | No  | NA    | 0    | 0  | Low-quality    | Genome-fragment | 5.53  | 0     |
| S8-final-viral-combined_k141_272718  | [full] | 2835  | No  | NA    | 1    | 0  | Low-quality    | Genome-fragment | 5.34  | 0     |
| S9-final-viral-combined_k141_201217  | [full] | 2836  | No  | NA    | 0    | 0  | Not-determined | Genome-fragment | 4.85  | 0     |
| S12-final-viral-combined_k141_293929 | [full] | 4052  | No  | NA    | 0    | 2  | Not-determined | Genome-fragment | NA    | 0     |
| S7-final-viral-combined_k141_82093   | [full] | 2836  | No  | NA    | 0    | 0  | Low-quality    | Genome-fragment | 5.23  | 0     |
| S12-final-viral-combined_k141_209293 | [full] | 1341  | No  | NA    | 0    | 0  | Not-determined | Genome-fragment | NA    | 0     |
| S12-final-viral-combined_k141_58436  | [full] | 1419  | No  | NA    | 0    | 0  | Not-determined | Genome-fragment | NA    | 0     |
| S1-final-viral-combined_k141_40941   | [full] | 2837  | No  | NA    | 1    | 0  | Low-quality    | Genome-fragment | 6.55  | 0     |
| S12-final-viral-combined_k141_358941 | [full] | 1201  | No  | NA    | 0    | 1  | Not-determined | Genome-fragment | NA    | 0     |
| S12-final-viral-combined_k141_159568 | [full] | 1544  | No  | NA    | 0    | 1  | Not-determined | Genome-fragment | NA    | 0     |
| S4_k141_6399                         |        | 2837  | No  | NA    | 0    | 2  | Low-quality    | Genome-fragment | 0.75  | 0     |
| S12-final-viral-combined_k141_108651 | [full] | 1501  | No  | NA    | 0    | 0  | Not-determined | Genome-fragment | NA    | 0     |
| S12-final-viral-combined_k141_91840  | [full] | 1472  | No  | NA    | 0    | 1  | Not-determined | Genome-fragment | NA    | 0     |
| S12-final-viral-combined_k141_25459  | [full] | 47975 | No  | NA    | 2    | 20 | High-quality   | High-quality    | 100   | 0     |
| S5-final-viral-combined_k141_19109   | [full] | 2838  | No  | NA    | 3    | 0  | Low-quality    | Genome-fragment | 6.33  | 0     |
| S9-final-viral-combined_k141_12584   | [full] | 2839  | No  | NA    | 0    | 0  | Low-quality    | Genome-fragment | 5.57  | 0     |
| S12-final-viral-combined_k141_76064  | [full] | 1497  | No  | NA    | 0    | 0  | Not-determined | Genome-fragment | NA    | 0     |
| S12-final-viral-combined_k141_293992 | [full] | 1236  | No  | NA    | 0    | 0  | Not-determined | Genome-fragment | NA    | 0     |
| S12-final-viral-combined_k141_58516  | [full] | 3004  | No  | NA    | 0    | 0  | Not-determined | Genome-fragment | NA    | 0     |
| S12-final-viral-combined_k141_209386 | [full] | 3613  | No  | NA    | 0    | 0  | Not-determined | Genome-fragment | NA    | 0     |
| S12-final-viral-combined_k141_294022 | [full] | 3826  | No  | NA    | 0    | 2  | Not-determined | Genome-fragment | NA    | 0     |
| S12-final-viral-combined_k141_393973 | [full] | 4855  | No  | NA    | 0    | 4  | Not-determined | Genome-fragment | NA    | 0     |
| S12-final-viral-combined_k141_193690 | [full] | 5948  | No  | NA    | 0    | 0  | Not-determined | Genome-fragment | NA    | 0     |
| S12-final-viral-combined_k141_359037 | [full] | 1544  | No  | NA    | 0    | 1  | Not-determined | Genome-fragment | NA    | 0     |
| S11-final-viral-combined_k141_273453 | [full] | 2839  | No  | NA    | 0    | 1  | Low-quality    | Genome-fragment | 2.36  | 0     |
| S12-final-viral-combined_k141_142957 | [full] | 1911  | No  | NA    | 0    | 0  | Not-determined | Genome-fragment | NA    | 0     |
| S17_k141_15555                       |        | 2839  | No  | NA    | 0    | 0  | Low-quality    | Genome-fragment | 6.02  | 0     |
| S12-final-viral-combined_k141_226633 | [full] | 1239  | No  | NA    | 0    | 1  | Not-determined | Genome-fragment | NA    | 0     |
| S12_k141_51455                       |        | 2839  | No  | NA    | 0    | 0  | Low-quality    | Genome-fragment | 4.49  | 0     |
| S4-final-viral-combined_k141_21590   | [full] | 2839  | No  | NA    | 0    | 1  | Low-quality    | Genome-fragment | 0.49  | 0     |
| S12-final-viral-combined_k141_175940 | [full] | 5763  | No  | NA    | 0    | 4  | Not-determined | Genome-fragment | NA    | 0     |
| S1-final-viral-combined_k141_180273  | [full] | 2840  | No  | NA    | 0    | 2  | Low-quality    | Genome-fragment | 1.54  | 0     |
| S3-final-viral-combined_k141_123451  | [full] | 2840  | No  | NA    | 0    | 0  | Low-quality    | Genome-fragment | 3.35  | 0     |
| S17-final-viral-combined_k141_73251  | [full] | 2840  | No  | NA    | 0    | 0  | Low-quality    | Genome-fragment | 5.63  | 0     |
| S12-final-viral-combined_k141_343081 | [full] | 1396  | No  | NA    | 0    | 0  | Not-determined | Genome-fragment | NA    | 0     |
| S12-final-viral-combined_k141_125263 | [full] | 4943  | No  | NA    | 0    | 4  | Not-determined | Genome-fragment | NA    | 0     |
| S6-final-viral-combined_k141_100160  | [full] | 2840  | No  | NA    | 0    | 0  | Low-quality    | Genome-fragment | 8.03  | 0     |
| S12-final-viral-combined_k141_294056 | [full] | 1552  | No  | NA    | 0    | 0  | Not-determined | Genome-fragment | NA    | 0     |
| S11_k141_29950                       |        | 2841  | No  | NA    | 0    | 0  | Low-quality    | Genome-fragment | 4.76  | 0     |
| S12-final-viral-combined_k141_159627 | [full] | 1568  | No  | NA    | 0    | 1  | Not-determined | Genome-fragment | NA    | 0     |
| S12-final-viral-combined_k141_25573  | [full] | 3344  | No  | NA    | 0    | 1  | Not-determined | Genome-fragment | NA    | 0     |
| S12-final-viral-combined_k141_176000 | [full] | 1020  | No  | NA    | 0    | 2  | Not-determined | Genome-fragment | NA    | 0     |
| S12-final-viral-combined_k141_209493 | [full] | 1200  | No  | NA    | 0    | 1  | Not-determined | Genome-fragment | NA    | 0     |
| S12-final-viral-combined_k141_42589  | [full] | 3562  | No  | NA    | 0    | 1  | Not-determined | Genome-fragment | NA    | 0     |
| S1-final-viral-combined_k141_53388   | [full] | 2841  | No  | NA    | 0    | 0  | Low-quality    | Genome-fragment | 7.28  | 0     |
| S12-final-viral-combined_k141_10883  | [full] | 2297  | No  | NA    | 0    | 1  | Not-determined | Genome-fragment | NA    | 0     |
| S7-final-viral-combined_k141_51742   | [full] | 2841  | No  | NA    | 0    | 4  | Low-quality    | Genome-fragment | 0.8   | 0     |
| S12-final-viral-combined_k141_209515 | [full] | 1515  | No  | NA    | 0    | 1  | Not-determined | Genome-fragment | NA    | 0     |
| S7-final-viral-combined_k141_217797  | [full] | 2841  | No  | NA    | 0    | 3  | Low-quality    | Genome-fragment | 5.16  | 0     |
| S12-final-viral-combined_k141_76219  | [full] | 1427  | No  | NA    | 0    | 0  | Not-determined | Genome-fragment | NA    | 0     |
| S6-final-viral-combined_k141_12575   | [full] | 2841  | No  | NA    | 0    | 4  | Low-quality    | Genome-fragment | 2.22  | 0     |
| S12-final-viral-combined_k141_343179 | [full] | 1493  | No  | NA    | 0    | 1  | Not-determined | Genome-fragment | NA    | 0     |
| S12-final-viral-combined_k141_343188 | [full] | 2918  | No  | NA    | 0    | 0  | Not-determined | Genome-fragment | NA    | 0     |
| S12-final-viral-combined_k141_143074 | [full] | 2028  | No  | NA    | 0    | 0  | Not-determined | Genome-fragment | NA    | 0     |
| S12-final-viral-combined_k141_343196 | [full] | 1201  | No  | NA    | 0    | 1  | Not-determined | Genome-fragment | NA    | 0     |
| S3-final-viral-combined_k141_200140  | [full] | 2842  | No  | NA    | 0    | 2  | Low-quality    | Genome-fragment | 0.85  | 0     |
| S3-final-viral-combined_k141_1339    | [full] | 2842  | No  | NA    | 0    | 3  | Low-quality    | Genome-fragment | 1.39  | 0     |
| S12-final-viral-combined_k141_310274 | [full] | 2842  | No  | NA    | 3    | 0  | Low-quality    | Genome-fragment | 4.4   | 0     |
| S12-final-viral-combined_k141_294383 | [full] | 2004  | No  | NA    | 0    | 2  | Not-determined | Genome-fragment | NA    | 0     |
| S2-final-viral-combined_k141_18975   | [full] | 2842  | No  | NA    | 0    | 0  | Low-quality    | Genome-fragment | 6.43  | 0     |
| S12-final-viral-combined_k141_231626 | [full] | 2842  | No  | NA    | 1    | 0  | Low-quality    | Genome-fragment | 5.44  | 0     |
| S2_k141_151826                       |        | 2843  | No  | NA    | 0    | 1  | Low-quality    | Genome-fragment | 2.78  | 0     |
| S12-final-viral-combined_k141_193910 | [full] | 1916  | No  | NA    | 0    | 0  | Not-determined | Genome-fragment | NA    | 0     |
| S12-final-viral-combined_k141_226810 | [full] | 1210  | No  | NA    | 0    | 0  | Not-determined | Genome-fragment | NA    | 0     |
| S4-final-viral-combined_k141_156476  | [full] | 2843  | No  | NA    | 3    | 0  | Low-quality    | Genome-fragment | 7.62  | 0     |
| S12-final-viral-combined_k141_243243 | [full] | 2063  | No  | NA    | 0    | 0  | Not-determined | Genome-fragment | NA    | 0     |
| S1-final-viral-combined_k141_242105  | [full] | 2844  | No  | NA    | 0    | 0  | Low-quality    | Genome-fragment | 6.42  | 0     |
| S12-final-viral-combined_k141_377116 | [full] | 1855  | No  | NA    | 0    | 2  | Not-determined | Genome-fragment | NA    | 0     |
| S12-final-viral-combined_k141_36448  | [full] | 2844  | No  | NA    | 0    | 1  | Low-quality    | Genome-fragment | 0.84  | 0     |
| S12-final-viral-combined_k141_176070 | [full] | 3831  | No  | NA    | 0    | 2  | Not-determined | Genome-fragment | NA    | 0     |
| S12-final-viral-combined_k141_226847 | [full] | 3773  | No  | NA    | 0    | 2  | Not-determined | Genome-fragment | NA    | 0     |
| S12-final-viral-combined_k141_394111 | [full] | 7714  | No  | NA    | 0    | 3  | Not-determined | Genome-fragment | NA    | 0     |
| S12-final-viral-combined_k141_400781 | [full] | 2844  | No  | NA    | 0    | 1  | Low-quality    | Genome-fragment | 7.64  | 0     |
| S12-final-viral-combined_k141_58715  | [full] | 1692  | No  | NA    | 0    | 1  | Not-determined | Genome-fragment | NA    | 0     |
| S12-final-viral-combined_k141_8742   | [full] | 1065  | No  | NA    | 0    | 1  | Not-determined | Genome-fragment | NA    | 0     |
| S12-final-viral-combined_k141_25911  | [full] | 5840  | No  | NA    | 0    | 4  | Not-determined | Genome-fragment | NA    | 0     |
| S12-final-viral-combined_k141_209717 | [full] | 2749  | No  | NA    | 0    | 1  | Not-determined | Genome-fragment | NA    | 0     |
| S12-final-viral-combined_k141_8762   | [full] | 3610  | No  | NA    | 0    | 2  | Not-determined | Genome-fragment | NA    | 0     |
| S17-final-viral-combined_k141_138120 | [full] | 2845  | No  | NA    | 0    | 1  | Low-quality    | Genome-fragment | 1.96  | 0     |
| S12-final-viral-combined_k141_42716  | [full] | 2056  | No  | NA    | 0    | 2  | Not-determined | Genome-fragment | NA    | 0     |
| S12-final-viral-comb                 |        |       |     |       |      |    |                |                 |       |       |



|                                       |          |       |     |       |    |    |                |                 |    |       |       |
|---------------------------------------|----------|-------|-----|-------|----|----|----------------|-----------------|----|-------|-------|
| S12-final-viral-combined_k141_2270151 | [full]   | 1042  | No  | NA    | 0  | 1  | Not-determined | Genome-fragment | NA | 2.12  | 0     |
| S1-final-viral-combined_k141_194691   | [full]   | 2852  | No  | NA    | 0  | 0  | Low-quality    | Genome-fragment | NA | 1.44  | 0     |
| S1-final-viral-combined_k141_1955291  | [full]   | 2852  | No  | NA    | 0  | 0  | Low-quality    | Genome-fragment | NA | 1.44  | 0     |
| S12-final-viral-combined_k141_3434801 | [full]   | 11984 | No  | NA    | 0  | 14 | Not-determined | Genome-fragment | NA | 0     | 0     |
| S12-final-viral-combined_k141_3434841 | [full]   | 1179  | No  | NA    | 0  | 1  | Not-determined | Genome-fragment | NA | 0     | 0     |
| S12-final-viral-combined_k141_761311  | [full]   | 1508  | No  | NA    | 0  | 0  | Not-determined | Genome-fragment | NA | 0     | 0     |
| S12-final-viral-combined_k141_1359781 | [full]   | 2852  | No  | NA    | 0  | 0  | Low-quality    | Genome-fragment | NA | 7.33  | 0     |
| S12-final-viral-combined_k141_3434871 | [full]   | 4446  | No  | NA    | 0  | 5  | Not-determined | Genome-fragment | NA | 0     | 0     |
| S12-final-viral-combined_k141_429151  | [full]   | 2855  | No  | NA    | 0  | 1  | Not-determined | Genome-fragment | NA | 0     | 0     |
| S5-final-viral-combined_k141_1070491  | [full]   | 2853  | No  | NA    | 0  | 3  | Low-quality    | Genome-fragment | NA | 1.37  | 0     |
| S12-final-viral-combined_k141_3591901 | [full]   | 64793 | Yes | 27741 | 19 | 26 | Medium-quality | Genome-fragment | NA | 58.55 | 57.19 |
| S17-final-viral-combined_k141_200501  | [full]   | 2854  | No  | NA    | 1  | 0  | Low-quality    | Genome-fragment | NA | 1.82  | 0     |
| S8-final-viral-combined_k141_820051   | [full]   | 2854  | No  | NA    | 2  | 0  | Low-quality    | Genome-fragment | NA | 6     | 0     |
| S12-final-viral-combined_k141_2098811 | [full]   | 10045 | No  | NA    | 0  | 3  | Not-determined | Genome-fragment | NA | 0     | 0     |
| S12-final-viral-combined_k141_314521  | [full]   | 1165  | No  | NA    | 0  | 3  | Low-quality    | Genome-fragment | NA | 0     | 0     |
| S12-final-viral-combined_k141_2557811 | [full]   | 45415 | No  | NA    | 15 | 0  | High-quality   | Genome-fragment | NA | 97.98 | 0     |
| S8-final-viral-combined_k141_2177911  | [full]   | 2854  | No  | NA    | 0  | 3  | Low-quality    | Genome-fragment | NA | 0.99  | 0     |
| S12-final-viral-combined_k141_1092161 | [full]   | 2802  | No  | NA    | 0  | 2  | Not-determined | Genome-fragment | NA | 0     | 0     |
| S12-final-viral-combined_k141_1253771 | [full]   | 2856  | No  | NA    | 0  | 2  | Not-determined | Genome-fragment | NA | 0     | 0     |
| S8_k141_58232                         |          | 2854  | No  | NA    | 0  | 0  | Low-quality    | Genome-fragment | NA | 3.02  | 0     |
| S12-final-viral-combined_k141_38411   | [full]   | 2855  | No  | NA    | 0  | 3  | Low-quality    | Genome-fragment | NA | 2.22  | 0     |
| S12-final-viral-combined_k141_259801  | [full]   | 1220  | No  | NA    | 0  | 1  | Not-determined | Genome-fragment | NA | 0     | 0     |
| S12-final-viral-combined_k141_3774241 | [full]   | 5747  | No  | NA    | 0  | 2  | Not-determined | Genome-fragment | NA | 0     | 0     |
| S12-final-viral-combined_k141_89051   | [full]   | 7910  | No  | NA    | 0  | 7  | Not-determined | Genome-fragment | NA | 0     | 0     |
| S2-final-viral-combined_k141_1873561  | [full]   | 2855  | No  | NA    | 0  | 2  | Low-quality    | Genome-fragment | NA | 0.69  | 0     |
| S12-final-viral-combined_k141_58521   | [full]   | 2457  | No  | NA    | 0  | 1  | Not-determined | Genome-fragment | NA | 0     | 0     |
| S8_k141_232309                        |          | 2855  | No  | NA    | 1  | 0  | Low-quality    | Genome-fragment | NA | 1.92  | 0     |
| S12-final-viral-combined_k141_1253641 | [full]   | 3550  | No  | NA    | 0  | 1  | Not-determined | Genome-fragment | NA | 0     | 0     |
| S7_k141_235089                        |          | 2856  | No  | NA    | 0  | 0  | Low-quality    | Genome-fragment | NA | 4.77  | 0     |
| S12-final-viral-combined_k141_3435561 | [full]   | 2120  | No  | NA    | 0  | 2  | Not-determined | Genome-fragment | NA | 0     | 0     |
| S12-final-viral-combined_k141_3134801 | [full]   | 3413  | No  | NA    | 0  | 2  | Not-determined | Genome-fragment | NA | 0     | 0     |
| S12-final-viral-combined_k141_22191   | [full]   | 2219  | No  | NA    | 0  | 2  | Not-determined | Genome-fragment | NA | 0     | 0     |
| S12-final-viral-combined_k141_2434821 | [full]   | 1201  | No  | NA    | 0  | 0  | Not-determined | Genome-fragment | NA | 0     | 0     |
| S12-final-viral-combined_k141_1765691 | [full]   | 2856  | No  | NA    | 0  | 1  | Low-quality    | Genome-fragment | NA | 5.09  | 0     |
| S12-final-viral-combined_k141_3151511 | [full]   | 1003  | No  | NA    | 0  | 1  | Not-determined | Genome-fragment | NA | 0     | 0     |
| S12-final-viral-combined_k141_2099811 | [full]   | 1116  | No  | NA    | 0  | 0  | Not-determined | Genome-fragment | NA | 0     | 0     |
| S11-final-viral-combined_k141_1742051 | [H2gene] | 2857  | No  | NA    | 0  | 0  | Low-quality    | Genome-fragment | NA | 4.77  | 0     |
| S12-final-viral-combined_k141_766091  | [full]   | 5369  | No  | NA    | 0  | 2  | Not-determined | Genome-fragment | NA | 0     | 0     |
| S12-final-viral-combined_k141_3436041 | [full]   | 1879  | No  | NA    | 0  | 2  | Not-determined | Genome-fragment | NA | 0     | 0     |
| S1-final-viral-combined_k141_3374231  | [full]   | 2857  | No  | NA    | 0  | 1  | Low-quality    | Genome-fragment | NA | 3.04  | 0     |
| S12-final-viral-combined_k141_2099971 | [full]   | 1114  | No  | NA    | 0  | 1  | Not-determined | Genome-fragment | NA | 0     | 0     |
| S12-final-viral-combined_k141_1761791 | [full]   | 1309  | No  | NA    | 0  | 0  | Not-determined | Genome-fragment | NA | 7.03  | 0     |
| S2-final-viral-combined_k141_2205991  | [full]   | 2857  | No  | NA    | 2  | 0  | Low-quality    | Genome-fragment | NA | 4.66  | 0     |
| S12-final-viral-combined_k141_1092911 | [full]   | 1252  | No  | NA    | 0  | 0  | Not-determined | Genome-fragment | NA | 0     | 0     |
| S12-final-viral-combined_k141_30461   | [full]   | 4357  | No  | NA    | 0  | 2  | Not-determined | Genome-fragment | NA | 0     | 0     |
| S11-final-viral-combined_k141_1445131 | [full]   | 2858  | No  | NA    | 3  | 0  | Low-quality    | Genome-fragment | NA | 7.78  | 0     |
| S12-final-viral-combined_k141_3277261 | [full]   | 3297  | No  | NA    | 0  | 2  | Not-determined | Genome-fragment | NA | 0     | 0     |
| S12-final-viral-combined_k141_1254251 | [full]   | 2646  | No  | NA    | 0  | 2  | Not-determined | Genome-fragment | NA | 0     | 0     |
| S1-final-viral-combined_k141_2718011  | [full]   | 2858  | No  | NA    | 0  | 0  | Low-quality    | Genome-fragment | NA | 7.2   | 0     |
| S12-final-viral-combined_k141_2100391 | [full]   | 11138 | No  | NA    | 0  | 5  | Not-determined | Genome-fragment | NA | 6.14  | 0     |
| S12-final-viral-combined_k141_3552161 | [full]   | 2858  | No  | NA    | 0  | 0  | Low-quality    | Genome-fragment | NA | 6.14  | 0     |
| S11-final-viral-combined_k141_2107651 | [full]   | 2859  | No  | NA    | 0  | 0  | Low-quality    | Genome-fragment | NA | 4.99  | 0     |
| S12-final-viral-combined_k141_90651   | [full]   | 1282  | No  | NA    | 1  | 2  | Not-determined | Genome-fragment | NA | 0     | 0     |
| S12-final-viral-combined_k141_90711   | [full]   | 5352  | No  | NA    | 0  | 4  | Not-determined | Genome-fragment | NA | 0     | 0     |
| S12-final-viral-combined_k141_2272051 | [full]   | 1028  | No  | NA    | 0  | 1  | Not-determined | Genome-fragment | NA | 0     | 0     |
| S12-final-viral-combined_k141_2598501 | [full]   | 2147  | No  | NA    | 0  | 1  | Not-determined | Genome-fragment | NA | 0     | 0     |
| S12-final-viral-combined_k141_1754581 | [full]   | 2859  | No  | NA    | 2  | 0  | Low-quality    | Genome-fragment | NA | 4.64  | 0     |
| S4-final-viral-combined_k141_61991    | [full]   | 2859  | No  | NA    | 0  | 2  | Low-quality    | Genome-fragment | NA | 1.41  | 0     |
| S12-final-viral-combined_k141_3820931 | [full]   | 2860  | No  | NA    | 0  | 0  | Low-quality    | Genome-fragment | NA | 6.59  | 0     |
| S12-final-viral-combined_k141_2436081 | [full]   | 2450  | No  | NA    | 0  | 3  | Not-determined | Genome-fragment | NA | 0     | 0     |
| S12-final-viral-combined_k141_430441  | [full]   | 1609  | No  | NA    | 0  | 0  | Not-determined | Genome-fragment | NA | 0     | 0     |
| S2-final-viral-combined_k141_1116511  | [full]   | 2861  | No  | NA    | 0  | 0  | Low-quality    | Genome-fragment | NA | 2.37  | 0     |
| S12-final-viral-combined_k141_1764431 | [full]   | 1051  | No  | NA    | 0  | 2  | Not-determined | Genome-fragment | NA | 0     | 0     |
| S6-final-viral-combined_k141_200651   | [full]   | 2861  | No  | NA    | 3  | 0  | Low-quality    | Genome-fragment | NA | 7.55  | 0     |
| S8-final-viral-combined_k141_2554101  | [full]   | 2861  | No  | NA    | 3  | 0  | Low-quality    | Genome-fragment | NA | 7.03  | 0     |
| S17-final-viral-combined_k141_1668941 | [full]   | 2862  | No  | NA    | 0  | 0  | Low-quality    | Genome-fragment | NA | 6.41  | 0     |
| S12-final-viral-combined_k141_1106831 | [full]   | 2862  | No  | NA    | 2  | 0  | Low-quality    | Genome-fragment | NA | 4.17  | 0     |
| S12-final-viral-combined_k141_590031  | [full]   | 1074  | No  | NA    | 0  | 0  | Not-determined | Genome-fragment | NA | 5.28  | 0     |
| S2-final-viral-combined_k141_1641791  | [full]   | 2862  | No  | NA    | 0  | 0  | Low-quality    | Genome-fragment | NA | 0     | 0     |
| S12-final-viral-combined_k141_1602141 | [full]   | 2853  | No  | NA    | 0  | 2  | Not-determined | Genome-fragment | NA | 0     | 0     |
| S12-final-viral-combined_k141_2272931 | [full]   | 1447  | No  | NA    | 0  | 0  | Not-determined | Genome-fragment | NA | 0     | 0     |
| S12-final-viral-combined_k141_2945001 | [full]   | 2268  | No  | NA    | 0  | 0  | Not-determined | Genome-fragment | NA | 0     | 0     |
| S12-final-viral-combined_k141_1765641 | [full]   | 1303  | No  | NA    | 0  | 1  | Not-determined | Genome-fragment | NA | 0     | 0     |
| S4_k141_13355                         |          | 2862  | No  | NA    | 0  | 1  | Low-quality    | Genome-fragment | NA | 0.76  | 0     |
| S12-final-viral-combined_k141_3151791 | [full]   | 4230  | No  | NA    | 0  | 0  | Not-determined | Genome-fragment | NA | 0     | 0     |
| S5-final-viral-combined_k141_802441   | [full]   | 2863  | No  | NA    | 0  | 0  | Low-quality    | Genome-fragment | NA | 6.43  | 0     |
| S12-final-viral-combined_k141_590791  | [full]   | 1090  | No  | NA    | 0  | 1  | Not-determined | Genome-fragment | NA | 0     | 0     |
| S12-final-viral-combined_k141_1602551 | [full]   | 1842  | No  | NA    | 0  | 1  | Not-determined | Genome-fragment | NA | 0     | 0     |
| S12-final-viral-combined_k141_925251  | [full]   | 1258  | No  | NA    | 0  | 0  | Not-determined | Genome-fragment | NA | 0     | 0     |
| S12-final-viral-combined_k141_2774201 | [full]   | 4788  | No  | NA    | 0  | 3  | Not-determined | Genome-fragment | NA | 0     | 0     |
| S11-final-viral-combined_k141_3083161 | [full]   | 2864  | No  | NA    | 0  | 1  | Low-quality    | Genome-fragment | NA | 1.53  | 0     |
| S12-final-viral-combined_k141_1095151 | [full]   | 1305  | No  | NA    | 0  | 0  | Not-determined | Genome-fragment | NA | 0     | 0     |
| S12-final-viral-combined_k141_591211  | [full]   | 2375  | No  | NA    | 0  | 1  | Not-determined | Genome-fragment | NA | 0     | 0     |
| S12-final-viral-combined_k141_3438701 | [full]   | 3722  | No  | NA    | 0  | 1  | Not-determined | Genome-fragment | NA | 0     | 0     |
| S12-final-viral-combined_k141_2949591 | [full]   | 5012  | No  | NA    | 0  | 3  | Not-determined | Genome-fragment | NA | 0     | 0     |
| S12-final-viral-combined_k141_261561  | [full]   | 2257  | No  | NA    | 0  | 1  | Not-determined | Genome-fragment | NA | 0     | 0     |
| S12-final-viral-combined_k141_2274201 | [full]   | 1426  | No  | NA    | 0  | 0  | Not-determined | Genome-fragment | NA | 0     | 0     |
| S12-final-viral-combined_k141_2946251 | [full]   | 1136  | No  | NA    | 0  | 1  | Not-determined | Genome-fragment | NA | 0     | 0     |
| S12-final-viral-combined_k141_3869731 | [full]   | 2864  | No  | NA    | 0  | 0  | Low-quality    | Genome-fragment | NA | 3.71  | 0     |
| S12-final-viral-combined_k141_591791  | [full]   | 1598  | No  | NA    | 0  | 1  | Not-determined | Genome-fragment | NA | 0     | 0     |
| S12-final-viral-combined_k141_3142301 | [full]   | 2864  | No  | NA    | 0  | 0  | Low-quality    | Genome-fragment | NA | 5.58  | 0     |
| S12-final-viral-combined_k141_769111  | [full]   | 1296  | No  | NA    | 0  | 0  | Not-determined | Genome-fragment | NA | 0     | 0     |
| S8-final-viral-combined_k141_2128351  | [full]   | 2864  | No  | NA    | 2  | 0  | Low-quality    | Genome-fragment | NA | 6.75  | 0     |
| S7-final-viral-combined_k141_199651   | [full]   | 2865  | No  | NA    | 0  | 1  | Low-quality    | Genome-fragment | NA | 2.77  | 0     |
| S12-final-viral-combined_k141_260021  | [full]   | 1165  | No  | NA    | 0  | 0  | Not-determined | Genome-fragment | NA | 0     | 0     |
| S12-final-viral-combined_k141_1766441 | [full]   | 2008  | No  | NA    | 0  | 1  | Not-determined | Genome-fragment | NA | 0     | 0     |
| S12-final-viral-combined_k141_162091  | [full]   | 2771  | No  | NA    | 0  | 2  | Not-determined | Genome-fragment | NA | 0     | 0     |
| S8-final-viral-combined_k141_2467901  | [full]   | 2865  | No  | NA    | 0  | 2  | Low-quality    | Genome-fragment | NA | 7.48  | 0     |
| S11-final-viral-combined_k141_2818751 | [full]   | 2866  | No  | NA    | 0  | 0  | Low-quality    | Genome-fragment | NA | 3.32  | 0     |
| S12-final-viral-combined_k141_2107201 | [full]   | 1369  | No  | NA    | 0  | 0  | Not-determined | Genome-fragment | NA | 0     | 0     |
| S17-final-viral-combined_k141_1953781 | [full]   | 2866  | No  | NA    | 0  | 0  | Low-quality    | Genome-fragment | NA | 1.89  | 0     |
| S2-final-viral-combined_k141_4231711  | [full]   | 2866  | No  | NA    | 2  | 0  | Low-quality    | Genome-fragment | NA | 0.34  | 0     |
| S12-final-viral-combined_k141_1944651 | [full]   | 6796  | No  | NA    | 0  | 0  | Not-determined | Genome-fragment | NA | 0     | 0     |
| S8-final-viral-combined_k141_1300981  | [full]   | 2866  | No  | NA    | 0  | 0  | Low-quality    | Genome-fragment | NA | 0.82  | 0     |
| S12-final-viral-combined_k141_359601  | [full]   | 1291  | No  | NA    | 0  | 0  | Not-determined | Genome-fragment | NA | 0     | 0     |
| S5-final-viral-combined_k141_1152421  | [full]   | 2867  | No  | NA    | 0  | 1  | Low-quality    | Genome-fragment | NA | 2.61  | 0     |
| S8-final-viral-combined_k141_2459991  | [full]   | 2867  | No  | NA    | 0  | 2  | Low-quality    | Genome-fragment | NA | 4.91  | 0     |
| S12-final-viral-combined_k141_2600361 | [full]   | 31189 | No  | NA    | 4  | 0  | Medium-quality | Genome-fragment | NA | 54.91 | 0     |
| S12-final-viral-combined_k141_91481   | [full]   | 2112  | No  | NA    | 0  | 0  | Not-determined | Genome-fragment | NA | 0     | 0     |
| S12-final-viral-combined_k141_3119141 | [full]   | 1895  | No  | NA    | 0  | 3  | Not-determined | Genome-fragment | NA | 0     | 0     |
| S11-final-viral-combined_k141_1846811 | [full]   | 2868  | No  | NA    | 0  | 0  | Low-quality    | Genome-fragment | NA | 7.12  | 0     |
| S3-final-viral-combined_k141_266861   | [full]   | 2868  | No  | NA    | 0  | 0  | Low-quality    | Genome-fragment | NA | 6.61  | 0     |
| S5-final-viral-combined_k141_1944071  | [full]   | 2869  | Yes | 1404  | 1  | 1  | Low-quality    | Genome-fragment | NA | 1.57  | 51.06 |
| S12-final-viral-combined_k141_433651  | [full]   | 2270  | No  | NA    | 0  | 0  | Not-determined | Genome-fragment | NA | 0     | 0     |
| S12-final-viral-combined_k141_125581  | [full]   | 1652  | No  | NA    | 0  | 1  | Not-determined | Genome-fragment | NA | 0     | 0     |
| S7-final-viral-combined_k141_616861   | [full]   | 2869  | No  | NA    | 2  | 0  | Low-quality    | Genome-fragment | NA | 6.47  | 0     |
| S12-final-viral-combined_k141_3139551 | [full]   | 10977 | No  | NA    | 0  | 0  | Not-determined | Genome-fragment | NA | 0     | 0     |
| S12-final-viral-combined_k141_1086071 | [full]   | 1135  | No  | NA    | 0  | 0  | Not-determined | Genome-fragment | NA | 0     | 0     |
| S12-final-viral-combined_k141_1607951 | [full]   | 2869  | No  | NA    | 2  | 0  | Low-quality    | Genome-fragment | NA | 6.67  | 0     |
| S12-final-viral-combined_k141_2601191 | [full]   | 3193  | No  | NA    | 0  | 0  | Not-determined |                 |    |       |       |



|                                      |          |        |     |      |   |   |                |                 |                 |      |       |   |
|--------------------------------------|----------|--------|-----|------|---|---|----------------|-----------------|-----------------|------|-------|---|
| S12-final-viral-combined_k141_328080 | [full]   | 6392   | No  | NA   | 0 | 3 | Not-determined | Genome-fragment | NA              | 0    | 0     |   |
| S12-final-viral-combined_k141_312313 | [full]   | 4736   | No  | NA   | 0 | 3 | Not-determined | Genome-fragment | NA              | 0    | 0     |   |
| S1-final-viral-combined_k141_196806  | [full]   | 2878   | No  | NA   | 5 | 0 | Low-quality    | Genome-fragment | NA              | 9.02 | 0     |   |
| S12-final-viral-combined_k141_260373 | [full]   | 1901   | No  | NA   | 0 | 2 | Not-determined | Genome-fragment | NA              | 0    | 0     |   |
| S11-final-viral-combined_k141_250315 | [full]   | 2879   | No  | NA   | 0 | 0 | Low-quality    | Genome-fragment | NA              | 5.79 | 0     |   |
| S12-final-viral-combined_k141_295072 | [full]   | 1287   | No  | NA   | 0 | 1 | Not-determined | Genome-fragment | NA              | 0    | 0     |   |
| S12-final-viral-combined_k141_394752 | [full]   | 2195   | No  | NA   | 0 | 2 | Not-determined | Genome-fragment | NA              | 0    | 0     |   |
| S12-final-viral-combined_k141_74553  | [full]   | 2879   | No  | NA   | 1 | 0 | Low-quality    | Genome-fragment | NA              | 6.87 | 0     |   |
| S12-final-viral-combined_k141_148018 | [full]   | 2879   | No  | NA   | 0 | 1 | Low-quality    | Genome-fragment | NA              | 7.89 | 0     |   |
| S12-final-viral-combined_k141_9434   | [full]   | 3208   | No  | NA   | 0 | 3 | Not-determined | Genome-fragment | NA              | 0    | 0     |   |
| S9-final-viral-combined_k141_123341  | [full]   | 2880   | Yes | 246  | 1 | 1 | Low-quality    | Genome-fragment | NA              | 0.07 | 91.46 |   |
| S12-final-viral-combined_k141_238201 | [full]   | 6026   | No  | NA   | 0 | 2 | Not-determined | Genome-fragment | NA              | 0    | 0     |   |
| S12-final-viral-combined_k141_18570  | [full]   | 2880   | No  | NA   | 0 | 3 | Low-quality    | Genome-fragment | NA              | 3.27 | 0     |   |
| S12-final-viral-combined_k141_92952  | [full]   | 3539   | No  | NA   | 0 | 4 | Not-determined | Genome-fragment | NA              | 0    | 0     |   |
| S12-final-viral-combined_k141_246091 | [full]   | 4319   | No  | NA   | 0 | 1 | Not-determined | Genome-fragment | NA              | 0    | 0     |   |
| S2-final-viral-combined_k141_130040  | [full]   | 2880   | No  | NA   | 0 | 1 | Low-quality    | Genome-fragment | NA              | 0.69 | 0     |   |
| S12-final-viral-combined_k141_243926 | [full]   | 3679   | No  | NA   | 0 | 4 | Not-determined | Genome-fragment | NA              | 0    | 0     |   |
| S1-final-viral-combined_k141_28427   | [full]   | 2881   | No  | NA   | 0 | 2 | Low-quality    | Genome-fragment | NA              | 8.18 | 0     |   |
| S2_k141_238200                       | [full]   | 2881   | No  | NA   | 1 | 0 | Low-quality    | Genome-fragment | NA              | 1.59 | 0     |   |
| S11-final-viral-combined_k141_287706 | [full]   | 2882   | No  | NA   | 0 | 0 | Low-quality    | Genome-fragment | NA              | 5.36 | 0     |   |
| S1-final-viral-combined_k141_121446  | [full]   | 2882   | No  | NA   | 0 | 2 | Low-quality    | Genome-fragment | NA              | 2.65 | 0     |   |
| S17-k141_193561                      | [full]   | 2882   | No  | NA   | 0 | 3 | Low-quality    | Genome-fragment | NA              | 1.4  | 0     |   |
| S8-final-viral-combined_k141_140062  | [full]   | 2882   | No  | NA   | 0 | 0 | Low-quality    | Genome-fragment | NA              | 6.51 | 0     |   |
| S12-final-viral-combined_k141_125940 | [full]   | 1715   | No  | NA   | 0 | 0 | Not-determined | Genome-fragment | NA              | 0    | 0     |   |
| S9-final-viral-combined_k141_57891   | [full]   | 2883   | No  | NA   | 0 | 2 | Low-quality    | Genome-fragment | NA              | 1.04 | 0     |   |
| S12-final-viral-combined_k141_125951 | [full]   | 2528   | No  | NA   | 0 | 1 | Not-determined | Genome-fragment | NA              | 0    | 0     |   |
| S5-final-viral-combined_k141_101917  | [full]   | 2883   | No  | NA   | 0 | 1 | Low-quality    | Genome-fragment | NA              | 4.56 | 0     |   |
| S12-final-viral-combined_k141_43858  | [full]   | 2725   | No  | NA   | 0 | 2 | Not-determined | Genome-fragment | NA              | 0    | 0     |   |
| S12-final-viral-combined_k141_59730  | [full]   | 3981   | No  | NA   | 0 | 0 | Not-determined | Genome-fragment | NA              | 0    | 0     |   |
| S12-final-viral-combined_k141_247493 | [full]   | 2883   | No  | NA   | 0 | 4 | Low-quality    | Genome-fragment | NA              | 1.03 | 0     |   |
| S12-final-viral-combined_k141_243986 | [full]   | 1954   | No  | NA   | 0 | 0 | Not-determined | Genome-fragment | NA              | 0    | 0     |   |
| S12-final-viral-combined_k141_59745  | [full]   | 5181   | No  | NA   | 0 | 6 | Not-determined | Genome-fragment | NA              | 0    | 0     |   |
| S12-final-viral-combined_k141_77583  | [full]   | 1794   | No  | NA   | 0 | 1 | Not-determined | Genome-fragment | NA              | 0    | 0     |   |
| S12-final-viral-combined_k141_260478 | [full]   | 1855   | No  | NA   | 0 | 0 | Not-determined | Genome-fragment | NA              | 0    | 0     |   |
| S2_k141_221565                       | [full]   | 2883   | No  | NA   | 0 | 0 | Low-quality    | Genome-fragment | NA              | 4.82 | 0     |   |
| S12-final-viral-combined_k141_9603   | [full]   | 1527   | No  | NA   | 0 | 1 | Not-determined | Genome-fragment | NA              | 0    | 0     |   |
| S11-final-viral-combined_k141_188923 | [full]   | 2884   | No  | NA   | 2 | 0 | Low-quality    | Genome-fragment | NA              | 3.72 | 0     |   |
| S12-final-viral-combined_k141_77603  | [full]   | 1690   | No  | NA   | 0 | 0 | Not-determined | Genome-fragment | NA              | 0    | 0     |   |
| S7_k141_222241                       | [full]   | 2884   | No  | NA   | 0 | 0 | Low-quality    | Genome-fragment | NA              | 2.7  | 0     |   |
| S8-final-viral-combined_k141_104959  | [full]   | 2884   | No  | NA   | 2 | 0 | Low-quality    | Genome-fragment | NA              | 5.23 | 0     |   |
| S12-final-viral-combined_k141_210663 | [full]   | 3318   | No  | NA   | 0 | 0 | Not-determined | Genome-fragment | NA              | 0.33 | 0     |   |
| S7-final-viral-combined_k141_53818   | [full]   | 2885   | No  | NA   | 0 | 2 | Low-quality    | Genome-fragment | NA              | 0    | 0     |   |
| S12-final-viral-combined_k141_378280 | [full]   | 1191   | No  | NA   | 0 | 1 | Not-determined | Genome-fragment | NA              | 0    | 0     |   |
| S12-final-viral-combined_k141_278014 | [full]   | 2845   | No  | NA   | 0 | 2 | Not-determined | Genome-fragment | NA              | 0    | 0     |   |
| S8_k141_119458                       | [full]   | 2885   | No  | NA   | 0 | 3 | Low-quality    | Genome-fragment | NA              | 1.89 | 0     |   |
| S12-final-viral-combined_k141_26805  | [full]   | 6340   | No  | NA   | 0 | 2 | Not-determined | Genome-fragment | NA              | 0    | 0     |   |
| S11-final-viral-combined_k141_9009   | [full]   | 2886   | No  | NA   | 0 | 4 | Low-quality    | Genome-fragment | NA              | 1.99 | 0     |   |
| S12-final-viral-combined_k141_210669 | [full]   | 8273   | No  | NA   | 0 | 3 | Not-determined | Genome-fragment | NA              | 0    | 0     |   |
| S2_k141_158226                       | [full]   | 2886   | No  | NA   | 0 | 1 | Low-quality    | Genome-fragment | NA              | 0.44 | 0     |   |
| S12-final-viral-combined_k141_260518 | [full]   | 1552   | No  | NA   | 0 | 0 | Not-determined | Genome-fragment | NA              | 0    | 0     |   |
| S12-final-viral-combined_k141_26813  | [full]   | 1877   | No  | NA   | 0 | 1 | Not-determined | Genome-fragment | NA              | 0    | 0     |   |
| S12-final-viral-combined_k141_278028 | [full]   | 2017   | No  | NA   | 0 | 2 | Not-determined | Genome-fragment | NA              | 0    | 0     |   |
| S12-final-viral-combined_k141_328262 | [full]   | 1592   | No  | NA   | 0 | 0 | Not-determined | Genome-fragment | NA              | 0    | 0     |   |
| S12-final-viral-combined_k141_143565 | [full]   | 2613   | No  | NA   | 0 | 3 | Not-determined | Genome-fragment | NA              | 0    | 0     |   |
| S12-final-viral-combined_k141_59856  | [full]   | 610289 | No  | NA   | 0 | 5 | Not-determined | Genome-fragment | NA              | 0    | 0     |   |
| S12-final-viral-combined_k141_394942 | [full]   | 11493  | No  | NA   | 0 | 6 | Not-determined | Genome-fragment | NA              | 0    | 0     |   |
| S12-final-viral-combined_k141_328298 | [full]   | 1014   | No  | NA   | 0 | 0 | Not-determined | Genome-fragment | NA              | 0    | 0     |   |
| S12-final-viral-combined_k141_44023  | [full]   | 1119   | No  | NA   | 0 | 0 | Not-determined | Genome-fragment | NA              | 0    | 0     |   |
| S12-final-viral-combined_k141_344541 | [full]   | 1340   | No  | NA   | 0 | 2 | Not-determined | Genome-fragment | NA              | 0    | 0     |   |
| S12-final-viral-combined_k141_295290 | [full]   | 1492   | No  | NA   | 0 | 0 | Not-determined | Genome-fragment | NA              | 0    | 0     |   |
| S12-final-viral-combined_k141_378367 | [full]   | 1333   | No  | NA   | 0 | 1 | Not-determined | Genome-fragment | NA              | 0    | 0     |   |
| S12-final-viral-combined_k141_378369 | [full]   | 4340   | No  | NA   | 0 | 2 | Not-determined | Genome-fragment | NA              | 0    | 0     |   |
| S12-final-viral-combined_k141_312602 | [full]   | 2949   | No  | NA   | 0 | 0 | Not-determined | Genome-fragment | NA              | 0    | 0     |   |
| S12-final-viral-combined_k141_44083  | [full]   | 1132   | No  | NA   | 0 | 1 | Not-determined | Genome-fragment | NA              | 0    | 0     |   |
| S8-final-viral-combined_k141_152707  | [full]   | 2886   | Yes | 1378 | 0 | 1 | Low-quality    | Genome-fragment | NA              | 2.28 | 52.25 |   |
| S12-final-viral-combined_k141_160908 | [full]   | 1054   | No  | NA   | 0 | 0 | Not-determined | Genome-fragment | NA              | 0    | 0     |   |
| S12-final-viral-combined_k141_17796  | [full]   | 2887   | No  | NA   | 0 | 2 | Low-quality    | Genome-fragment | NA              | 1.58 | 0     |   |
| S12-final-viral-combined_k141_59953  | [full]   | 2373   | No  | NA   | 0 | 2 | Not-determined | Genome-fragment | NA              | 0    | 0     |   |
| S12-final-viral-combined_k141_218096 | [full]   | 2887   | No  | NA   | 0 | 1 | Not-determined | Genome-fragment | NA              | 0    | 0     |   |
| S11-final-viral-combined_k141_172027 | [H2gene] | 2888   | No  | NA   | 1 | 0 | Low-quality    | Genome-fragment | NA              | 7.53 | 0     |   |
| S12-final-viral-combined_k141_160917 | [full]   | 3245   | No  | NA   | 0 | 2 | Not-determined | Genome-fragment | NA              | 0    | 0     |   |
| S1-final-viral-combined_k141_233641  | [full]   | 2888   | No  | NA   | 0 | 2 | Low-quality    | Genome-fragment | NA              | 3.58 | 0     |   |
| S3-final-viral-combined_k141_54440   | [full]   | 2888   | No  | NA   | 1 | 0 | Low-quality    | Genome-fragment | NA              | 7.56 | 0     |   |
| S12-final-viral-combined_k141_378423 | [full]   | 1848   | No  | NA   | 0 | 0 | Not-determined | Genome-fragment | NA              | 0    | 0     |   |
| S12-final-viral-combined_k141_328335 | [full]   | 1987   | No  | NA   | 0 | 3 | Not-determined | Genome-fragment | NA              | 0    | 0     |   |
| S17-final-viral-combined_k141_181617 | [full]   | 2888   | No  | NA   | 0 | 3 | Low-quality    | Genome-fragment | NA              | 1.31 | 0     |   |
| S12-final-viral-combined_k141_44136  | [full]   | 6721   | No  | NA   | 0 | 4 | Not-determined | Genome-fragment | NA              | 0    | 0     |   |
| S12-final-viral-combined_k141_328356 | [full]   | 6616   | No  | NA   | 0 | 4 | Not-determined | Genome-fragment | NA              | 0    | 0     |   |
| S1-final-viral-combined_k141_367618  | [full]   | 2889   | No  | NA   | 0 | 0 | Low-quality    | Genome-fragment | NA              | 2.76 | 0     |   |
| S12-final-viral-combined_k141_241588 | [full]   | 2889   | No  | NA   | 1 | 0 | Low-quality    | Genome-fragment | NA              | 1.94 | 0     |   |
| S12-final-viral-combined_k141_177131 | [full]   | 1700   | No  | NA   | 0 | 2 | Not-determined | Genome-fragment | NA              | 0    | 0     |   |
| S2-final-viral-combined_k141_100351  | [full]   | 2889   | No  | NA   | 0 | 1 | Low-quality    | Genome-fragment | NA              | 2.15 | 0     |   |
| S11-final-viral-combined_k141_8513   | [full]   | 2890   | No  | NA   | 0 | 0 | Low-quality    | Genome-fragment | NA              | 7.28 | 0     |   |
| S12-final-viral-combined_k141_77726  | [full]   | 4128   | No  | NA   | 0 | 1 | Not-determined | Genome-fragment | NA              | 0    | 0     |   |
| S12-final-viral-combined_k141_109997 | [full]   | 1061   | No  | NA   | 0 | 0 | Not-determined | Genome-fragment | NA              | 0    | 0     |   |
| S5-final-viral-combined_k141_201163  | [full]   | 2890   | No  | NA   | 0 | 0 | Low-quality    | Genome-fragment | NA              | 6.62 | 0     |   |
| S17-final-viral-combined_k141_13938  | [full]   | 2890   | No  | NA   | 0 | 1 | Low-quality    | Genome-fragment | NA              | 5.08 | 0     |   |
| S12-final-viral-combined_k141_44191  | [full]   | 1816   | No  | NA   | 0 | 1 | Not-determined | Genome-fragment | NA              | 0    | 0     |   |
| S8-final-viral-combined_k141_181815  | [full]   | 2890   | No  | NA   | 0 | 0 | Low-quality    | Genome-fragment | NA              | 2.41 | 0     |   |
| S1-final-viral-combined_k141_52637   | [full]   | 2891   | No  | NA   | 0 | 0 | Low-quality    | Genome-fragment | NA              | 6.4  | 0     |   |
| S1-final-viral-combined_k141_109091  | [full]   | 2891   | No  | NA   | 0 | 2 | Low-quality    | Genome-fragment | NA              | 1.87 | 0     |   |
| S6-final-viral-combined_k141_181771  | [full]   | 2891   | No  | NA   | 0 | 2 | Low-quality    | Genome-fragment | NA              | 3.59 | 0     |   |
| S5-final-viral-combined_k141_203097  | [full]   | 2892   | No  | NA   | 2 | 0 | Low-quality    | Genome-fragment | NA              | 3.21 | 0     |   |
| S12-final-viral-combined_k141_312704 | [full]   | 1738   | No  | NA   | 0 | 2 | Not-determined | Genome-fragment | NA              | 0    | 0     |   |
| S12-final-viral-combined_k141_238201 | [full]   | 8641   | No  | NA   | 0 | 2 | Not-determined | Genome-fragment | NA              | 0    | 0     |   |
| S12-final-viral-combined_k141_161018 | [full]   | 5833   | No  | NA   | 0 | 0 | Not-determined | Genome-fragment | NA              | 0    | 0     |   |
| S5-final-viral-combined_k141_26412   | [full]   | 2892   | No  | NA   | 1 | 0 | Low-quality    | Genome-fragment | NA              | 6.6  | 0     |   |
| S12-final-viral-combined_k141_60031  | [full]   | 1764   | No  | NA   | 0 | 2 | Not-determined | Genome-fragment | NA              | 0    | 0     |   |
| S17-final-viral-combined_k141_14818  | [full]   | 2893   | No  | NA   | 0 | 0 | Low-quality    | Genome-fragment | NA              | 8.13 | 0     |   |
| S12-final-viral-combined_k141_177344 | [full]   | 2288   | No  | NA   | 0 | 2 | Not-determined | Genome-fragment | NA              | 0    | 0     |   |
| S1-final-viral-combined_k141_21619   | [full]   | 2894   | Yes | 2567 | 2 | 1 | Low-quality    | Genome-fragment | NA              | 7.38 | 11.3  |   |
| S5-final-viral-combined_k141_136921  | [full]   | 2894   | Yes | 2293 | 1 | 0 | Low-quality    | Genome-fragment | NA              | 5.38 | 20.77 |   |
| S12-final-viral-combined_k141_26995  | [full]   | 8478   | No  | NA   | 0 | 7 | Not-determined | Genome-fragment | NA              | 0    | 0     |   |
| S12-final-viral-combined_k141_395157 | [full]   | 5720   | No  | NA   | 0 | 4 | Not-determined | Genome-fragment | NA              | 0    | 0     |   |
| S12-final-viral-combined_k141_395157 | [full]   | 2437   | No  | NA   | 0 | 1 | Not-determined | Genome-fragment | NA              | 0    | 0     |   |
| S12-final-viral-combined_k141_328444 | [full]   | 1271   | No  | NA   | 0 | 0 | Not-determined | Genome-fragment | NA              | 0    | 0     |   |
| S17-final-viral-combined_k141_46301  | [full]   | 2894   | No  | NA   | 2 | 0 | Low-quality    | Genome-fragment | NA              | 6.45 | 0     |   |
| S12-final-viral-combined_k141_60080  | [full]   | 1204   | No  | NA   | 0 | 0 | Not-determined | Genome-fragment | NA              | 0    | 0     |   |
| S12-final-viral-combined_k141_77770  | [full]   | 1815   | No  | NA   | 0 | 1 | Not-determined | Genome-fragment | NA              | 0    | 0     |   |
| S9-final-viral-combined_k141_56813   | [full]   | 2895   | No  | NA   | 0 | 0 | Low-quality    | Genome-fragment | NA              | 7    | 0     |   |
| S12-final-viral-combined_k141_244257 | [full]   | 1863   | No  | NA   | 0 | 0 | Not-determined | Genome-fragment | NA              | 100  | 0     |   |
| S12-final-viral-combined_k141_210942 | [full]   | 18527  | No  | NA   | 0 | 1 | High-quality   | High-quality    | Genome-fragment | NA   | 6.28  | 0 |
| S11-final-viral-combined_k141_112515 | [full]   | 2895   | No  | NA   | 4 | 0 | Low-quality    | Genome-fragment | NA              | 1.84 | 0     |   |
| S2-final-viral-combined_k141_247413  | [full]   | 2895   | No  | NA   | 0 | 3 | Low-quality    | Genome-fragment | NA              | 0    | 0     |   |
| S12-final-viral-combined_k141_238493 | [full]   | 1171   | No  | NA   | 0 | 2 | Not-determined | Genome-fragment | NA              | 0    | 0     |   |
| S12-final-viral-combined_k141_344806 | [full]   | 1416   | No  | NA   | 0 | 0 | Not-determined | Genome-fragment | NA              | 0    | 0     |   |
| S4-final-viral-combined_k141_107369  | [full]   | 2895   | No  | NA   | 0 | 2 | Low-quality    | Genome-fragment | NA              | 0.92 | 0     |   |
| S1_k141_118737                       | [full]   | 2896   | Yes | 2192 | 1 | 1 | Low-quality    | Genome-fragment | NA              | 2.58 | 24.31 |   |
| S3_k141_76027                        | [full]   | 2896   | No  | NA   | 1 | 0 | Low-quality    | Genome-fragment | NA              | 0.33 | 0     |   |
| S11-final-viral-combined_k141_244811 | [full]   | 2897   | No  | NA   | 1 | 0 | Low-quality    | Genome-fragment | NA              | 6.56 | 0     |   |
| S17-final-viral-combined_k141_177502 | [full]   | 2897   | No  | NA   | 0 | 0 | Low-quality    | Genome-fragment | NA              |      |       |   |



|                                      |           |       |     |      |   |      |                |                 |    |       |       |
|--------------------------------------|-----------|-------|-----|------|---|------|----------------|-----------------|----|-------|-------|
| S12-final-viral-combined_k141_360282 | [full]    | 6545  | No  | NA   | 0 | 3    | Not-determined | Genome-fragment | NA | 0     | 0     |
| S5-final-viral-combined_k141_261048  | [full]    | 5846  | No  | NA   | 0 | 2    | Not-determined | Genome-fragment | NA | 0     | 0     |
| S12-final-viral-combined_k141_281225 | [full]    | 2905  | No  | NA   | 0 | 1    | Low-quality    | Genome-fragment | NA | 5.54  | 0     |
| S12-final-viral-combined_k141_167325 | [full]    | 2905  | No  | NA   | 1 | 0    | Low-quality    | Genome-fragment | NA | 3.08  | 0     |
| S12-final-viral-combined_k141_328593 | [full]    | 8287  | No  | NA   | 0 | 2    | Not-determined | Genome-fragment | NA | 0     | 0     |
| S12-final-viral-combined_k141_195278 | [full]    | 5990  | No  | NA   | 0 | 5    | Not-determined | Genome-fragment | NA | 0     | 0     |
| S1-final-viral-combined_k141_291361  | [full]    | 2906  | No  | NA   | 0 | 2    | Low-quality    | Genome-fragment | NA | 7.59  | 0     |
| S5-final-viral-combined_k141_146992  | [full]    | 2906  | No  | NA   | 3 | 0    | Low-quality    | Genome-fragment | NA | 7.93  | 0     |
| S12-final-viral-combined_k141_157802 | [full]    | 2906  | No  | NA   | 0 | 2    | Low-quality    | Genome-fragment | NA | 0.93  | 0     |
| S12-final-viral-combined_k141_261121 | [full]    | 1026  | No  | NA   | 0 | 1    | Not-determined | Genome-fragment | NA | 0     | 0     |
| S12-final-viral-combined_k141_295543 | [full]    | 1354  | No  | NA   | 0 | 0    | Not-determined | Genome-fragment | NA | 0     | 0     |
| S1-final-viral-combined_k141_86      | [full]    | 2907  | No  | NA   | 0 | 2    | Low-quality    | Genome-fragment | NA | 1.03  | 0     |
| S1_k141_8648                         |           | 2907  | No  | NA   | 1 | 0    | Low-quality    | Genome-fragment | NA | 4.43  | 0     |
| S12-final-viral-combined_k141_328678 | [full]    | 2011  | No  | NA   | 0 | 2    | Not-determined | Genome-fragment | NA | 0     | 0     |
| S2-final-viral-combined_k141_1309    | [full]    | 2907  | No  | NA   | 2 | 0    | Low-quality    | Genome-fragment | NA | 8.67  | 0     |
| S12-final-viral-combined_k141_78698  | [full]    | 5213  | No  | NA   | 0 | 4    | Not-determined | Genome-fragment | NA | 0     | 0     |
| S17-final-viral-combined_k141_145733 | [full]    | 2908  | No  | NA   | 0 | 0    | Low-quality    | Genome-fragment | NA | 2.34  | 0     |
| S1_k141_82837                        |           | 2909  | No  | NA   | 1 | 0    | Low-quality    | Genome-fragment | NA | 7.3   | 0     |
| S12-final-viral-combined_k141_245119 | [full]    | 1211  | No  | NA   | 0 | 0    | Not-determined | Genome-fragment | NA | 0     | 0     |
| S1-final-viral-combined_k141_75696   | [full]    | 2910  | No  | NA   | 3 | 0    | Low-quality    | Genome-fragment | NA | 5.44  | 0     |
| S12-final-viral-combined_k141_139337 | [full]    | 2910  | No  | NA   | 3 | 0    | Low-quality    | Genome-fragment | NA | 1.41  | 0     |
| S12-final-viral-combined_k141_144021 | [full]    | 2409  | No  | NA   | 0 | 2    | Not-determined | Genome-fragment | NA | 0     | 0     |
| S12-final-viral-combined_k141_93714  | [full]    | 3913  | No  | NA   | 0 | 1    | Not-determined | Genome-fragment | NA | 0     | 0     |
| S12-final-viral-combined_k141_261211 | [full]    | 1957  | No  | NA   | 0 | 1    | Not-determined | Genome-fragment | NA | 0     | 0     |
| S12_k141_352526                      |           | 2910  | No  | NA   | 0 | 0    | Low-quality    | Genome-fragment | NA | 6.64  | 0     |
| S12-final-viral-combined_k141_78165  | [full]    | 1566  | No  | NA   | 0 | 1    | Not-determined | Genome-fragment | NA | 0     | 0     |
| S12-final-viral-combined_k141_244637 | [full]    | 1620  | No  | NA   | 0 | 1    | Not-determined | Genome-fragment | NA | 0     | 0     |
| S12-final-viral-combined_k141_10077  | [full]    | 4210  | No  | NA   | 0 | 2    | Not-determined | Genome-fragment | NA | 0     | 0     |
| S5-final-viral-combined_k141_166211  | [full]    | 2911  | No  | NA   | 0 | 2    | Low-quality    | Genome-fragment | NA | 3.6   | 0     |
| S12-final-viral-combined_k141_194391 | [full]    | 2911  | Yes | 2575 | 2 | 1    | Low-quality    | Genome-fragment | NA | 6.16  | 11.54 |
| S11_k141_206429                      |           | 2912  | No  | NA   | 0 | 2    | Low-quality    | Genome-fragment | NA | 0.44  | 0     |
| S12-final-viral-combined_k141_278868 | [full]    | 2000  | No  | NA   | 0 | 0    | Not-determined | Genome-fragment | NA | 0     | 0     |
| S12-final-viral-combined_k141_313039 | [full]    | 2281  | No  | NA   | 0 | 2    | Not-determined | Genome-fragment | NA | 0     | 0     |
| S12-final-viral-combined_k141_360460 | [full]    | 3090  | No  | NA   | 0 | 2    | Not-determined | Genome-fragment | NA | 0     | 0     |
| S1-final-viral-combined_k141_8796    | [full]    | 2912  | No  | NA   | 0 | 2    | Low-quality    | Genome-fragment | NA | 2.09  | 0     |
| S12-final-viral-combined_k141_277141 | [full]    | 8811  | No  | NA   | 0 | 2    | Not-determined | Genome-fragment | NA | 0     | 0     |
| S12-final-viral-combined_k141_395579 | [full]    | 1693  | No  | NA   | 0 | 0    | Not-determined | Genome-fragment | NA | 0     | 0     |
| S12-final-viral-combined_k141_27392  | [full]    | 1318  | No  | NA   | 0 | 0    | Not-determined | Genome-fragment | NA | 0     | 0     |
| S2-final-viral-combined_k141_471515  | [full]    | 2912  | No  | NA   | 0 | 0    | Low-quality    | Genome-fragment | NA | 5.43  | 0     |
| S4-final-viral-combined_k141_6344    | [full]    | 2912  | No  | NA   | 1 | 1    | Low-quality    | Genome-fragment | NA | 7.11  | 0     |
| S12-final-viral-combined_k141_213464 | [full]    | 1693  | No  | NA   | 0 | 0    | Not-determined | Genome-fragment | NA | 0     | 0     |
| S12-final-viral-combined_k141_379063 | [full]    | 1210  | No  | NA   | 0 | 0    | Not-determined | Genome-fragment | NA | 0     | 0     |
| S4_k141_48165                        |           | 2913  | No  | NA   | 0 | 0    | Low-quality    | Genome-fragment | NA | 3.08  | 0     |
| S12-final-viral-combined_k141_161487 | [full]    | 3929  | No  | NA   | 0 | 2    | Not-determined | Genome-fragment | NA | 0     | 0     |
| S12-final-viral-combined_k141_60572  | [full]    | 9401  | No  | NA   | 0 | 7    | Not-determined | Genome-fragment | NA | 0     | 0     |
| S12-final-viral-combined_k141_27430  | [full]    | 1586  | No  | NA   | 0 | 1    | Not-determined | Genome-fragment | NA | 0     | 0     |
| S9-final-viral-combined_k141_88184   | [full]    | 2914  | No  | NA   | 0 | 2    | Low-quality    | Genome-fragment | NA | 4.02  | 0     |
| S12-final-viral-combined_k141_10137  | [full]    | 2756  | No  | NA   | 0 | 1    | Not-determined | Genome-fragment | NA | 0     | 0     |
| S12-final-viral-combined_k141_44745  | [full]    | 2212  | No  | NA   | 0 | 2    | Not-determined | Genome-fragment | NA | 0     | 0     |
| S17-final-viral-combined_k141_74072  | [full]    | 2914  | No  | NA   | 0 | 2    | Low-quality    | Genome-fragment | NA | 1.27  | 0     |
| S4-final-viral-combined_k141_87566   | [full]    | 2915  | No  | NA   | 0 | 1    | Low-quality    | Genome-fragment | NA | 4.59  | 0     |
| S12-final-viral-combined_k141_144247 | [full]    | 1402  | No  | NA   | 0 | 2    | Not-determined | Genome-fragment | NA | 0     | 0     |
| S6-final-viral-combined_k141_6446    | [full]    | 2915  | No  | NA   | 0 | 1    | Low-quality    | Genome-fragment | NA | 4.2   | 0     |
| S5-final-viral-combined_k141_3899    | [full]    | 2916  | No  | NA   | 1 | 0    | Low-quality    | Genome-fragment | NA | 5.01  | 0     |
| S12-final-viral-combined_k141_228802 | [full]    | 1955  | No  | NA   | 0 | 1    | Not-determined | Genome-fragment | NA | 0     | 0     |
| S12-final-viral-combined_k141_244786 | [full]    | 1198  | No  | NA   | 0 | 2    | Not-determined | Genome-fragment | NA | 0     | 0     |
| S8-final-viral-combined_k141_1749    | [full]    | 2916  | No  | NA   | 0 | 1    | Low-quality    | Genome-fragment | NA | 7.72  | 0     |
| S7-final-viral-combined_k141_226388  | [full]    | 2917  | No  | NA   | 0 | 0    | Low-quality    | Genome-fragment | NA | 4.2   | 0     |
| S12-final-viral-combined_k141_335095 | [partial] | 2917  | Yes | 1426 | 2 | 1    | Low-quality    | Genome-fragment | NA | 34.27 | 51.11 |
| S12-final-viral-combined_k141_328858 | [full]    | 1549  | No  | NA   | 0 | 1    | Not-determined | Genome-fragment | NA | 0     | 0     |
| S12-final-viral-combined_k141_144286 | [full]    | 2650  | No  | NA   | 0 | 3    | Not-determined | Genome-fragment | NA | 0     | 0     |
| S12-final-viral-combined_k141_177881 | [full]    | 1104  | No  | NA   | 0 | 0    | Not-determined | Genome-fragment | NA | 0     | 0     |
| S1-final-viral-combined_k141_167149  | [full]    | 2918  | No  | NA   | 0 | 2    | Low-quality    | Genome-fragment | NA | 4.98  | 0     |
| S12-final-viral-combined_k141_144293 | [full]    | 4186  | No  | NA   | 0 | 2    | Not-determined | Genome-fragment | NA | 0     | 0     |
| S12-final-viral-combined_k141_78144  | [full]    | 2835  | No  | NA   | 0 | 2    | Not-determined | Genome-fragment | NA | 0     | 0     |
| S12-final-viral-combined_k141_328884 | [full]    | 1013  | No  | NA   | 0 | 2    | Not-determined | Genome-fragment | NA | 0     | 0     |
| S12-final-viral-combined_k141_379169 | [full]    | 1386  | No  | NA   | 0 | 1    | Not-determined | Genome-fragment | NA | 0     | 0     |
| S12-final-viral-combined_k141_10194  | [full]    | 2098  | No  | NA   | 0 | 1    | Not-determined | Genome-fragment | NA | 0     | 0     |
| S1-final-viral-combined_k141_39112   | [full]    | 2918  | No  | NA   | 0 | 1    | Low-quality    | Genome-fragment | NA | 0.7   | 0     |
| S5-final-viral-combined_k141_211462  | [full]    | 2918  | No  | NA   | 0 | 3    | Low-quality    | Genome-fragment | NA | 3.29  | 0     |
| S12-final-viral-combined_k141_244844 | [full]    | 1468  | No  | NA   | 0 | 0    | Not-determined | Genome-fragment | NA | 0     | 0     |
| S12-final-viral-combined_k141_244850 | [full]    | 3418  | No  | NA   | 0 | 0    | Not-determined | Genome-fragment | NA | 0     | 0     |
| S12-final-viral-combined_k141_93884  | [full]    | 2209  | No  | NA   | 0 | 2    | Not-determined | Genome-fragment | NA | 0     | 0     |
| S12-final-viral-combined_k141_27573  | [full]    | 1324  | No  | NA   | 0 | 0    | Not-determined | Genome-fragment | NA | 0     | 0     |
| S12-final-viral-combined_k141_212121 | [full]    | 8560  | No  | NA   | 0 | 0    | Not-determined | Genome-fragment | NA | 0     | 0     |
| S17-final-viral-combined_k141_259398 | [full]    | 2919  | No  | NA   | 0 | 0    | Low-quality    | Genome-fragment | NA | 7.91  | 0     |
| S12-final-viral-combined_k141_78431  | [full]    | 1012  | No  | NA   | 0 | 0    | Not-determined | Genome-fragment | NA | 0     | 0     |
| S8_k141_45772                        |           | 2919  | No  | NA   | 1 | 0    | Low-quality    | Genome-fragment | NA | 3.89  | 0     |
| S17-final-viral-combined_k141_65836  | [full]    | 2920  | No  | NA   | 0 | 1    | Low-quality    | Genome-fragment | NA | 5.5   | 0     |
| S2-final-viral-combined_k141_195284  | [full]    | 2920  | No  | NA   | 1 | 0    | Low-quality    | Genome-fragment | NA | 5.21  | 0     |
| S7-final-viral-combined_k141_10649   | [full]    | 2921  | No  | NA   | 1 | 0    | Low-quality    | Genome-fragment | NA | 6.42  | 0     |
| S12-final-viral-combined_k141_93919  | [full]    | 3777  | No  | NA   | 0 | 0    | Not-determined | Genome-fragment | NA | 0     | 0     |
| S12-final-viral-combined_k141_395714 | [full]    | 1020  | No  | NA   | 0 | 0    | Not-determined | Genome-fragment | NA | 0     | 0     |
| S8-final-viral-combined_k141_230095  | [full]    | 2921  | No  | NA   | 1 | 0    | Low-quality    | Genome-fragment | NA | 3.68  | 0     |
| S5-final-viral-combined_k141_135038  | [full]    | 2922  | No  | NA   | 0 | 0    | Low-quality    | Genome-fragment | NA | 7.46  | 0     |
| S12-final-viral-combined_k141_44844  | [full]    | 2003  | No  | NA   | 0 | 0    | Not-determined | Genome-fragment | NA | 0     | 0     |
| S2-final-viral-combined_k141_218932  | [full]    | 2922  | Yes | 2203 | 1 | 1    | Low-quality    | Genome-fragment | NA | 1.48  | 24.61 |
| S12-final-viral-combined_k141_211679 | [full]    | 4202  | No  | NA   | 0 | 5    | Not-determined | Genome-fragment | NA | 0     | 0     |
| S12-final-viral-combined_k141_211685 | [full]    | 1006  | No  | NA   | 0 | 0    | Not-determined | Genome-fragment | NA | 0     | 0     |
| S9-final-viral-combined_k141_64007   | [full]    | 2923  | No  | NA   | 3 | 0    | Low-quality    | Genome-fragment | NA | 6.51  | 0     |
| S6-final-viral-combined_k141_29467   | [partial] | 2923  | Yes | 1423 | 1 | 1    | Low-quality    | Genome-fragment | NA | 6.37  | 51.32 |
| S11-final-viral-combined_k141_273577 | [full]    | 2924  | No  | NA   | 1 | 2362 | Low-quality    | Genome-fragment | NA | 1.5   | 19.22 |
| S12-final-viral-combined_k141_126751 | [full]    | 1220  | No  | NA   | 0 | 2    | Not-determined | Genome-fragment | NA | 0     | 0     |
| S12-final-viral-combined_k141_345467 | [full]    | 1976  | No  | NA   | 0 | 1    | Not-determined | Genome-fragment | NA | 0     | 0     |
| S9-final-viral-combined_k141_97169   | [full]    | 2925  | No  | NA   | 0 | 1    | Low-quality    | Genome-fragment | NA | 0.9   | 0     |
| S12-final-viral-combined_k141_126794 | [full]    | 1558  | No  | NA   | 0 | 0    | Not-determined | Genome-fragment | NA | 0     | 0     |
| S12_k141_206981                      |           | 2925  | No  | NA   | 1 | 0    | Low-quality    | Genome-fragment | NA | 5.01  | 0     |
| S12-final-viral-combined_k141_153698 | [full]    | 2926  | No  | NA   | 2 | 0    | Low-quality    | Genome-fragment | NA | 5.11  | 0     |
| S12-final-viral-combined_k141_295863 | [full]    | 8616  | No  | NA   | 0 | 1    | Not-determined | Genome-fragment | NA | 0     | 0     |
| S2-final-viral-combined_k141_127550  | [H2gene]  | 2926  | No  | NA   | 1 | 0    | Low-quality    | Genome-fragment | NA | 6.13  | 0     |
| S5-final-viral-combined_k141_268221  | [full]    | 2927  | No  | NA   | 1 | 0    | Low-quality    | Genome-fragment | NA | 2.09  | 0     |
| S12-final-viral-combined_k141_379406 | [full]    | 2866  | No  | NA   | 0 | 2    | Not-determined | Genome-fragment | NA | 0     | 0     |
| S1-final-viral-combined_k141_240048  | [full]    | 2928  | No  | NA   | 3 | 0    | Low-quality    | Genome-fragment | NA | 8.41  | 0     |
| S12-final-viral-combined_k141_78559  | [full]    | 6177  | No  | NA   | 0 | 4    | Not-determined | Genome-fragment | NA | 0     | 0     |
| S1_k141_209530                       |           | 2928  | No  | NA   | 0 | 2    | Low-quality    | Genome-fragment | NA | 0.46  | 0     |
| S12-final-viral-combined_k141_360733 | [full]    | 2644  | No  | NA   | 0 | 3    | Not-determined | Genome-fragment | NA | 0     | 0     |
| S12-final-viral-combined_k141_10359  | [full]    | 3510  | No  | NA   | 0 | 2    | Not-determined | Genome-fragment | NA | 0     | 0     |
| S12-final-viral-combined_k141_211788 | [full]    | 12974 | No  | NA   | 0 | 9    | Not-determined | Genome-fragment | NA | 0     | 0     |
| S12-final-viral-combined_k141_27708  | [full]    | 1348  | No  | NA   | 0 | 2    | Not-determined | Genome-fragment | NA | 0     | 0     |
| S7-final-viral-combined_k141_68829   | [full]    | 2928  | No  | NA   | 0 | 1    | Low-quality    | Genome-fragment | NA | 3.82  | 0     |
| S12-final-viral-combined_k141_377108 | [full]    | 2928  | No  | NA   | 0 | 0    | Low-quality    | Genome-fragment | NA | 6.92  | 0     |
| S1-final-viral-combined_k141_391511  | [full]    | 2929  | No  | NA   | 0 | 0    | Low-quality    | Genome-fragment | NA | 0     | 0     |
| S7-final-viral-combined_k141_8801    | [full]    | 2929  | No  | NA   | 0 | 0    | Low-quality    | Genome-fragment | NA | 5.34  | 0     |
| S12-final-viral-combined_k141_178007 | [full]    | 1003  | No  | NA   | 0 | 0    | Not-determined | Genome-fragment | NA | 0     | 0     |
| S12-final-viral-combined_k141_229152 | [full]    | 1510  | No  | NA   | 0 | 1    | Not-determined | Genome-fragment | NA | 0     | 0     |
| S12-final-viral-combined_k141_10395  | [full]    | 1396  | No  | NA   | 0 | 0    | Not-determined | Genome-fragment | NA | 0     | 0     |
| S11-final-viral-combined_k141_143621 | [full]    | 2930  | No  | NA   | 0 | 3    | Low-quality    | Genome-fragment | NA | 1.42  | 0     |
| S12-final-viral-combined_k141_126912 | [full]    | 2040  | No  | NA   | 0 | 1    | Not-determined | Genome-fragment | NA | 0     | 0     |
| S12-final-viral-combined_k141_289844 | [full]    | 1329  | No  | NA   | 0 | 2    | Not-determined | Genome-fragment | NA | 0     | 0     |
| S7-final-viral-combined_k141_191727  | [full]    | 2931  | No  | NA   | 0 | 0    | Low-quality    | Genome-fragment | NA | 5.33  | 0     |
| S12-final-viral-combined_k141_275262 | [full]    | 1892  | No  | NA   | 0 | 2    | Not-determined | Genome-fragment | NA | 0     | 0     |
| S12-final-viral-combined_k141_261587 | [         |       |     |      |   |      |                |                 |    |       |       |



|                                      |            |       |     |       |    |   |                |                 |    |       |       |
|--------------------------------------|------------|-------|-----|-------|----|---|----------------|-----------------|----|-------|-------|
| S12-final-viral-combined_k141_195917 | [Full]     | 1679  | No  | NA    | 0  | 2 | Not-determined | Genome-fragment | NA | 0     | 0     |
| S12-final-viral-combined_k141_22951  | [Full]     | 1913  | No  | NA    | 0  | 0 | Not-determined | Genome-fragment | NA | 0     | 0     |
| S12-final-viral-combined_k141_279537 | [Full]     | 7284  | No  | NA    | 0  | 8 | Not-determined | Genome-fragment | NA | 0     | 0     |
| S17-final-viral-combined_k141_61717  | [Full]     | 2937  | No  | NA    | 3  | 0 | Low-quality    | Genome-fragment | NA | 6.84  | 0     |
| S12-final-viral-combined_k141_61059  | [Full]     | 3882  | No  | NA    | 0  | 4 | Not-determined | Genome-fragment | NA | 4     | 0     |
| S4-final-viral-combined_k141_136867  | [Full]     | 2937  | No  | NA    | 1  | 0 | Low-quality    | Genome-fragment | NA | 6.95  | 0     |
| S12-final-viral-combined_k141_27953  | [Full]     | 2054  | No  | NA    | 0  | 2 | Not-determined | Genome-fragment | NA | 0     | 0     |
| S12-final-viral-combined_k141_229558 | [Full]     | 3929  | No  | NA    | 0  | 4 | Not-determined | Genome-fragment | NA | 0     | 0     |
| S12-final-viral-combined_k141_79801  | [Full]     | 6434  | No  | NA    | 0  | 5 | Not-determined | Genome-fragment | NA | 0     | 0     |
| S12-final-viral-combined_k141_379860 | [Full]     | 6970  | No  | NA    | 0  | 6 | Not-determined | Genome-fragment | NA | 0     | 0     |
| S12-final-viral-combined_k141_378290 | [Full]     | 1620  | No  | NA    | 0  | 1 | Not-determined | Genome-fragment | NA | 0     | 0     |
| S1-final-viral-combined_k141_33183   | [Full]     | 2938  | No  | NA    | 1  | 2 | Low-quality    | Genome-fragment | NA | 3.45  | 0     |
| S12-final-viral-combined_k141_396215 | [Full]     | 2614  | No  | NA    | 0  | 1 | Not-determined | Genome-fragment | NA | 0     | 0     |
| S12-final-viral-combined_k141_341582 | [Full]     | 2938  | No  | NA    | 0  | 1 | Low-quality    | Genome-fragment | NA | 8.61  | 0     |
| S12-final-viral-combined_k141_45302  | [Full]     | 7017  | No  | NA    | 0  | 0 | Not-determined | Genome-fragment | NA | 0     | 0     |
| S4-final-viral-combined_k141_05661   | [Full]     | 2938  | No  | NA    | 0  | 1 | Not-determined | Genome-fragment | NA | 1.69  | 0     |
| S12-final-viral-combined_k141_229611 | [Full]     | 1474  | No  | NA    | 0  | 0 | Not-determined | Genome-fragment | NA | 0     | 0     |
| S12-final-viral-combined_k141_127332 | [Full]     | 1520  | No  | NA    | 0  | 1 | Not-determined | Genome-fragment | NA | 0     | 0     |
| S12-final-viral-combined_k141_161957 | [Full]     | 4286  | No  | NA    | 0  | 2 | Not-determined | Genome-fragment | NA | 0     | 0     |
| S2-final-viral-combined_k141_92333   | [Full]     | 2939  | No  | NA    | 1  | 0 | Low-quality    | Genome-fragment | NA | 8     | 0     |
| S5-final-viral-combined_k141_6360    | [Full]     | 2940  | No  | NA    | 0  | 0 | Low-quality    | Genome-fragment | NA | 3.03  | 0     |
| S12-final-viral-combined_k141_290269 | [Full]     | 1859  | No  | NA    | 0  | 0 | Not-determined | Genome-fragment | NA | 0     | 0     |
| S12-final-viral-combined_k141_379916 | [Full]     | 3608  | No  | NA    | 0  | 1 | Not-determined | Genome-fragment | NA | 0     | 0     |
| S12-final-viral-combined_k141_329359 | [Full]     | 2360  | No  | NA    | 0  | 2 | Not-determined | Genome-fragment | NA | 0     | 0     |
| S12-final-viral-combined_k141_325137 | [Full]     | 2940  | No  | NA    | 2  | 0 | Low-quality    | Genome-fragment | NA | 7.36  | 0     |
| S12-final-viral-combined_k141_311781 | [Full]     | 1178  | No  | NA    | 0  | 1 | Not-determined | Genome-fragment | NA | 0     | 0     |
| S12-final-viral-combined_k141_162016 | [Full]     | 1240  | No  | NA    | 0  | 2 | Not-determined | Genome-fragment | NA | 0     | 0     |
| S9-final-viral-combined_k141_100477  | [Full]     | 2941  | No  | NA    | 3  | 0 | Low-quality    | Genome-fragment | NA | 7.45  | 0     |
| S5-final-viral-combined_k141_38151   | [Full]     | 2941  | Yes | 502   | 4  | 4 | Low-quality    | Genome-fragment | NA | 0.87  | 82.93 |
| S12-final-viral-combined_k141_78935  | [Full]     | 1715  | No  | NA    | 0  | 0 | Not-determined | Genome-fragment | NA | 0     | 0     |
| S5-final-viral-combined_k141_172205  | [R2genome] | 2941  | No  | NA    | 2  | 0 | Low-quality    | Genome-fragment | NA | 5.17  | 0     |
| S4-final-viral-combined_k141_117265  | [Full]     | 2941  | Yes | 1947  | 1  | 0 | Not-determined | Genome-fragment | NA | 1.23  | 33.8  |
| S12-final-viral-combined_k141_94412  | [Full]     | 1536  | No  | NA    | 0  | 0 | Not-determined | Genome-fragment | NA | 0     | 0     |
| S7-final-viral-combined_k141_129496  | [Full]     | 2943  | No  | NA    | 1  | 0 | Low-quality    | Genome-fragment | NA | 1.92  | 0     |
| S17-k141_22400                       | [Full]     | 2943  | No  | NA    | 0  | 1 | Low-quality    | Genome-fragment | NA | 3.24  | 0     |
| S12-final-viral-combined_k141_144693 | [Full]     | 8448  | No  | NA    | 0  | 0 | Not-determined | Genome-fragment | NA | 0     | 0     |
| S8-final-viral-combined_k141_236032  | [Full]     | 2943  | No  | NA    | 1  | 0 | Low-quality    | Genome-fragment | NA | 5.24  | 0     |
| S12-final-viral-combined_k141_178429 | [Full]     | 2381  | No  | NA    | 0  | 2 | Not-determined | Genome-fragment | NA | 0     | 0     |
| S12-final-viral-combined_k141_10790  | [Full]     | 2324  | No  | NA    | 0  | 1 | Not-determined | Genome-fragment | NA | 0     | 0     |
| S8_k141_109011                       | [Full]     | 2943  | No  | NA    | 0  | 0 | Low-quality    | Genome-fragment | NA | 5.34  | 0     |
| S1-final-viral-combined_k141_117861  | [Full]     | 2944  | No  | NA    | 0  | 0 | Low-quality    | Genome-fragment | NA | 3.92  | 0     |
| S4_k141_128142                       | [Full]     | 2944  | No  | NA    | 0  | 2 | Low-quality    | Genome-fragment | NA | 5.86  | 0     |
| S2_k141_234550                       | [Full]     | 2945  | No  | NA    | 0  | 1 | Low-quality    | Genome-fragment | NA | 6.53  | 0     |
| S11-final-viral-combined_k141_46779  | [Full]     | 2947  | No  | NA    | 0  | 0 | Low-quality    | Genome-fragment | NA | 2.1   | 0     |
| S12-final-viral-combined_k141_212237 | [Full]     | 2397  | No  | NA    | 0  | 2 | Not-determined | Genome-fragment | NA | 0     | 0     |
| S7_k141_104822                       | [Full]     | 2947  | No  | NA    | 3  | 0 | Low-quality    | Genome-fragment | NA | 4.94  | 0     |
| S17-final-viral-combined_k141_240176 | [Full]     | 2947  | No  | NA    | 0  | 0 | Low-quality    | Genome-fragment | NA | 3.58  | 0     |
| S12-final-viral-combined_k141_61258  | [Full]     | 1457  | No  | NA    | 0  | 1 | Not-determined | Genome-fragment | NA | 0     | 0     |
| S12-final-viral-combined_k141_229732 | [Full]     | 4026  | No  | NA    | 0  | 0 | Not-determined | Genome-fragment | NA | 0     | 0     |
| S17-final-viral-combined_k141_86245  | [Full]     | 2947  | No  | NA    | 0  | 1 | Low-quality    | Genome-fragment | NA | 1.48  | 0     |
| S12-final-viral-combined_k141_261974 | [Full]     | 1985  | No  | NA    | 0  | 1 | Not-determined | Genome-fragment | NA | 0     | 0     |
| S2_k141_241250                       | [Full]     | 2947  | Yes | 997   | 1  | 1 | Low-quality    | Genome-fragment | NA | 0.61  | 66.17 |
| S6-final-viral-combined_k141_46245   | [Full]     | 2947  | Yes | 1800  | 1  | 2 | Low-quality    | Genome-fragment | NA | 3.29  | 38.92 |
| S11-final-viral-combined_k141_96946  | [Full]     | 2948  | No  | NA    | 1  | 0 | Low-quality    | Genome-fragment | NA | 1.78  | 0     |
| S12-final-viral-combined_k141_299895 | [Full]     | 2948  | No  | NA    | 1  | 0 | Low-quality    | Genome-fragment | NA | 7.22  | 0     |
| S12-final-viral-combined_k141_229745 | [Full]     | 1154  | No  | NA    | 0  | 0 | Not-determined | Genome-fragment | NA | 0     | 0     |
| S12-final-viral-combined_k141_396396 | [Full]     | 2699  | No  | NA    | 0  | 0 | Not-determined | Genome-fragment | NA | 0     | 0     |
| S12-final-viral-combined_k141_229750 | [Full]     | 2150  | No  | NA    | 0  | 1 | Not-determined | Genome-fragment | NA | 0     | 0     |
| S8-final-viral-combined_k141_63343   | [Full]     | 2948  | No  | NA    | 0  | 1 | Low-quality    | Genome-fragment | NA | 6.77  | 0     |
| S12-final-viral-combined_k141_345948 | [Full]     | 33538 | Yes | 28220 | 18 | 4 | Medium-quality | Genome-fragment | NA | 81.24 | 15.86 |
| S8-final-viral-combined_k141_258367  | [Full]     | 2949  | No  | NA    | 0  | 3 | Low-quality    | Genome-fragment | NA | 1.69  | 0     |
| S12-final-viral-combined_k141_162155 | [Full]     | 1490  | No  | NA    | 0  | 2 | Not-determined | Genome-fragment | NA | 0     | 0     |
| S12-final-viral-combined_k141_10831  | [Full]     | 1138  | No  | NA    | 0  | 1 | Not-determined | Genome-fragment | NA | 0     | 0     |
| S17-final-viral-combined_k141_77559  | [Full]     | 2950  | No  | NA    | 2  | 0 | Low-quality    | Genome-fragment | NA | 6.37  | 0     |
| S2_k141_189206                       | [Full]     | 2950  | No  | NA    | 2  | 0 | Low-quality    | Genome-fragment | NA | 6.56  | 0     |
| S1-final-viral-combined_k141_100469  | [Full]     | 2951  | No  | NA    | 0  | 0 | Low-quality    | Genome-fragment | NA | 6.63  | 0     |
| S12-final-viral-combined_k141_94590  | [Full]     | 1462  | No  | NA    | 0  | 0 | Not-determined | Genome-fragment | NA | 0     | 0     |
| S12-final-viral-combined_k141_10854  | [Full]     | 1886  | No  | NA    | 0  | 2 | Not-determined | Genome-fragment | NA | 0     | 0     |
| S7-final-viral-combined_k141_209608  | [Full]     | 2951  | No  | NA    | 0  | 0 | Not-determined | Genome-fragment | NA | 5.95  | 0     |
| S12-final-viral-combined_k141_212137 | [Full]     | 2213  | No  | NA    | 0  | 1 | Not-determined | Genome-fragment | NA | 0     | 0     |
| S12-final-viral-combined_k141_127577 | [Full]     | 1775  | No  | NA    | 0  | 0 | Not-determined | Genome-fragment | NA | 0     | 0     |
| S12-final-viral-combined_k141_245666 | [Full]     | 1350  | No  | NA    | 0  | 0 | Not-determined | Genome-fragment | NA | 0     | 0     |
| S12-final-viral-combined_k141_262126 | [Full]     | 2008  | No  | NA    | 0  | 2 | Not-determined | Genome-fragment | NA | 0     | 0     |
| S9_k141_43404                        | [Full]     | 2952  | No  | NA    | 0  | 0 | Low-quality    | Genome-fragment | NA | 6.02  | 0     |
| S12-final-viral-combined_k141_127601 | [Full]     | 2883  | No  | NA    | 0  | 4 | Not-determined | Genome-fragment | NA | 0     | 0     |
| S12-final-viral-combined_k141_178584 | [Full]     | 1497  | No  | NA    | 0  | 0 | Not-determined | Genome-fragment | NA | 0     | 0     |
| S1_k141_130302                       | [Full]     | 2952  | No  | NA    | 1  | 0 | Low-quality    | Genome-fragment | NA | 1.32  | 0     |
| S12-final-viral-combined_k141_262144 | [Full]     | 2003  | No  | NA    | 0  | 0 | Not-determined | Genome-fragment | NA | 0     | 0     |
| S11-final-viral-combined_k141_218910 | [Full]     | 2953  | No  | NA    | 0  | 0 | Low-quality    | Genome-fragment | NA | 6.47  | 0     |
| S12-final-viral-combined_k141_178608 | [Full]     | 1811  | No  | NA    | 0  | 1 | Not-determined | Genome-fragment | NA | 0     | 0     |
| S12-final-viral-combined_k141_262155 | [Full]     | 6562  | No  | NA    | 0  | 8 | Not-determined | Genome-fragment | NA | 0     | 0     |
| S12-final-viral-combined_k141_219353 | [Full]     | 6118  | Yes | 52155 | 21 | 7 | High-quality   | Genome-fragment | NA | 100   | 14.67 |
| S12-final-viral-combined_k141_262159 | [Full]     | 1923  | No  | NA    | 0  | 2 | Not-determined | Genome-fragment | NA | 0     | 0     |
| S11-final-viral-combined_k141_166078 | [Full]     | 2953  | No  | NA    | 0  | 1 | Low-quality    | Genome-fragment | NA | 11.4  | 0     |
| S1-final-viral-combined_k141_206478  | [Full]     | 2953  | No  | NA    | 0  | 2 | Low-quality    | Genome-fragment | NA | 2.09  | 0     |
| S12-final-viral-combined_k141_127638 | [Full]     | 1070  | No  | NA    | 0  | 1 | Not-determined | Genome-fragment | NA | 0     | 0     |
| S12-final-viral-combined_k141_33073  | [Full]     | 2953  | No  | NA    | 3  | 0 | Low-quality    | Genome-fragment | NA | 9.6   | 0     |
| S12-final-viral-combined_k141_32584  | [Full]     | 8565  | No  | NA    | 0  | 3 | Not-determined | Genome-fragment | NA | 0     | 0     |
| S12-final-viral-combined_k141_45433  | [Full]     | 1512  | No  | NA    | 0  | 2 | Not-determined | Genome-fragment | NA | 0     | 0     |
| S12-final-viral-combined_k141_127688 | [Full]     | 1325  | No  | NA    | 0  | 2 | Not-determined | Genome-fragment | NA | 0     | 0     |
| S12-final-viral-combined_k141_396593 | [Full]     | 4361  | No  | NA    | 0  | 2 | Not-determined | Genome-fragment | NA | 0     | 0     |
| S12-final-viral-combined_k141_178704 | [Full]     | 1905  | No  | NA    | 0  | 0 | Not-determined | Genome-fragment | NA | 0     | 0     |
| S3-final-viral-combined_k141_54251   | [Full]     | 2954  | No  | NA    | 0  | 1 | Low-quality    | Genome-fragment | NA | 4.57  | 0     |
| S12-final-viral-combined_k141_279968 | [Full]     | 2955  | No  | NA    | 0  | 1 | Not-determined | Genome-fragment | NA | 0     | 0     |
| S17-final-viral-combined_k141_156187 | [Full]     | 2954  | No  | NA    | 0  | 0 | Low-quality    | Genome-fragment | NA | 5.69  | 0     |
| S12-final-viral-combined_k141_119021 | [Full]     | 2954  | No  | NA    | 1  | 0 | Low-quality    | Genome-fragment | NA | 4.14  | 0     |
| S12-final-viral-combined_k141_245755 | [Full]     | 29036 | No  | NA    | 19 | 0 | Medium-quality | Genome-fragment | NA | 88.69 | 0     |
| S12-final-viral-combined_k141_145753 | [Full]     | 2384  | No  | NA    | 0  | 3 | Not-determined | Genome-fragment | NA | 0.77  | 58.4  |
| S12-final-viral-combined_k141_101978 | [Full]     | 2954  | Yes | 1228  | 0  | 1 | Low-quality    | Genome-fragment | NA | 0.96  | 0     |
| S12_k141_350225                      | [Full]     | 2954  | No  | NA    | 0  | 2 | Low-quality    | Genome-fragment | NA | 3.7   | 0     |
| S12-final-viral-combined_k141_162365 | [Full]     | 2781  | No  | NA    | 0  | 1 | Not-determined | Genome-fragment | NA | 0     | 0     |
| S4-final-viral-combined_k141_118105  | [Full]     | 2954  | No  | NA    | 0  | 1 | Low-quality    | Genome-fragment | NA | 3.96  | 0     |
| S12-final-viral-combined_k141_212506 | [Full]     | 4160  | No  | NA    | 0  | 3 | Not-determined | Genome-fragment | NA | 0     | 0     |
| S8_k141_250112                       | [Full]     | 2954  | No  | NA    | 0  | 1 | Low-quality    | Genome-fragment | NA | 2.41  | 0     |
| S3-final-viral-combined_k141_42715   | [Full]     | 2955  | No  | NA    | 0  | 1 | Low-quality    | Genome-fragment | NA | 6.58  | 0     |
| S9_k141_83055                        | [Full]     | 2957  | No  | NA    | 0  | 2 | Low-quality    | Genome-fragment | NA | 0.79  | 0     |
| S12-final-viral-combined_k141_296512 | [Full]     | 2165  | No  | NA    | 0  | 2 | Not-determined | Genome-fragment | NA | 0     | 0     |
| S12-final-viral-combined_k141_262291 | [Full]     | 3218  | No  | NA    | 0  | 4 | Not-determined | Genome-fragment | NA | 0     | 0     |
| S11-final-viral-combined_k141_207026 | [Full]     | 2957  | No  | NA    | 0  | 0 | Low-quality    | Genome-fragment | NA | 3.43  | 0     |
| S11-final-viral-combined_k141_109524 | [Full]     | 2957  | No  | NA    | 0  | 1 | Low-quality    | Genome-fragment | NA | 5.5   | 0     |
| S14-final-viral-combined_k141_239826 | [Full]     | 2957  | No  | NA    | 0  | 1 | Low-quality    | Genome-fragment | NA | 1.31  | 0     |
| S12-final-viral-combined_k141_245861 | [Full]     | 3167  | No  | NA    | 0  | 0 | Not-determined | Genome-fragment | NA | 0     | 0     |
| S12-final-viral-combined_k141_11089  | [Full]     | 1087  | No  | NA    | 0  | 1 | Not-determined | Genome-fragment | NA | 0     | 0     |
| S2-final-viral-combined_k141_82062   | [Full]     | 2959  | No  | NA    | 0  | 0 | Low-quality    | Genome-fragment | NA | 6.51  | 0     |
| S9-final-viral-combined_k141_479761  | [Full]     | 2960  | No  | NA    | 1  | 0 | Low-quality    | Genome-fragment | NA | 2.33  | 0     |
| S11-final-viral-combined_k141_69880  | [Full]     | 2961  | No  | NA    | 1  | 0 | Low-quality    | Genome-fragment | NA | 6.25  | 0     |
| S12-final-viral-combined_k141_280051 | [Full]     | 2396  | No  | NA    | 0  | 1 | Not-determined | Genome-fragment | NA | 0     | 0     |
| S12-final-viral-combined_k141_314112 | [Full]     | 3823  | No  | NA    | 0  | 2 | Not-determined | Genome-fragment | NA | 0     | 0     |
| S12-final-viral-combined_k141_178836 | [Full]     | 1831  | No  | NA    | 0  | 0 | Not-determined | Genome-fragment | NA | 0     | 0     |
| S12-final-viral-combined_k141_262380 | [Full]     | 2169  | No  | NA    | 0  | 2 | Not-determined | Genome-fragment | NA | 0     | 0     |
| S14-final-viral-combined_k141_76201  | [Full]     | 2962  | No  | NA    | 0  | 3 | Low-quality    | Genome-fragment |    |       |       |



|                                      |        |       |     |    |      |   |                |                 |       |       |
|--------------------------------------|--------|-------|-----|----|------|---|----------------|-----------------|-------|-------|
| S8-final-viral-combined_k141_239910  | [full] | 2966  | No  | NA | 1    | 0 | Low-quality    | Genome-fragment | 4.49  | 0     |
| S12-final-viral-combined_k141_38052  | [full] | 2976  | No  | NA | 0    | 2 | Not-determined | Genome-fragment | NA    | 0     |
| S11-final-viral-combined_k141_92938  | [full] | 2967  | No  | NA | 1    | 0 | Low-quality    | Genome-fragment | 6.99  | 0     |
| S3-final-viral-combined_k141_44915   | [full] | 2967  | No  | NA | 1    | 0 | Low-quality    | Genome-fragment | 4.76  | 0     |
| S12-final-viral-combined_k141_46099  | [full] | 3037  | No  | NA | 0    | 1 | Not-determined | Genome-fragment | NA    | 0     |
| S12-final-viral-combined_k141_262727 | [full] | 15826 | No  | NA | 0    | 9 | Not-determined | Genome-fragment | NA    | 0     |
| S12-final-viral-combined_k141_128239 | [full] | 2388  | No  | NA | 0    | 1 | Not-determined | Genome-fragment | NA    | 0     |
| S12-final-viral-combined_k141_330037 | [full] | 1469  | No  | NA | 0    | 0 | Not-determined | Genome-fragment | NA    | 0     |
| S2-final-viral-combined_k141_10791   | [full] | 2967  | No  | NA | 0    | 1 | Low-quality    | Genome-fragment | 1.5   | 0     |
| S12-final-viral-combined_k141_246092 | [full] | 2298  | No  | NA | 0    | 1 | Not-determined | Genome-fragment | NA    | 0     |
| S12-final-viral-combined_k141_28485  | [full] | 2214  | No  | NA | 0    | 1 | Not-determined | Genome-fragment | NA    | 0     |
| S1-final-viral-combined_k141_184241  | [full] | 2968  | No  | NA | 1    | 0 | Low-quality    | Genome-fragment | 7.25  | 0     |
| S12-final-viral-combined_k141_314375 | [full] | 1623  | No  | NA | 0    | 0 | Not-determined | Genome-fragment | NA    | 0     |
| S12-final-viral-combined_k141_380594 | [full] | 8122  | No  | NA | 0    | 4 | Not-determined | Genome-fragment | NA    | 0     |
| S17-final-viral-combined_k141_188998 | [full] | 2968  | Yes | NA | 1410 | 1 | Low-quality    | Genome-fragment | 2.85  | 52.49 |
| S2-final-viral-combined_k141_262727  | [full] | 10010 | No  | NA | 0    | 2 | Not-determined | Genome-fragment | NA    | 0     |
| S8-final-viral-combined_k141_258904  | [full] | 2968  | No  | NA | 2    | 0 | Low-quality    | Genome-fragment | 4.81  | 0     |
| S9-final-viral-combined_k141_120578  | [full] | 2969  | Yes | NA | 1219 | 2 | Low-quality    | Genome-fragment | 3.09  | 58.84 |
| S12-final-viral-combined_k141_246600 | [full] | 2412  | No  | NA | 0    | 2 | Not-determined | Genome-fragment | NA    | 0     |
| S9-final-viral-combined_k141_89465   | [full] | 2969  | No  | NA | 0    | 0 | Low-quality    | Genome-fragment | 7.45  | 0     |
| S17-final-viral-combined_k141_97011  | [full] | 2970  | No  | NA | 2    | 0 | Low-quality    | Genome-fragment | 1.71  | 0     |
| S9-final-viral-combined_k141_46140   | [full] | 2971  | No  | NA | 0    | 2 | Low-quality    | Genome-fragment | 0.85  | 0     |
| S17-final-viral-combined_k141_147740 | [full] | 2971  | No  | NA | 0    | 0 | Low-quality    | Genome-fragment | 3.31  | 0     |
| S12-final-viral-combined_k141_145498 | [full] | 5502  | No  | NA | 0    | 3 | Not-determined | Genome-fragment | NA    | 0     |
| S12-final-viral-combined_k141_113671 | [full] | 3432  | No  | NA | 0    | 3 | Not-determined | Genome-fragment | NA    | 0     |
| S2-final-viral-combined_k141_7321    | [full] | 2971  | No  | NA | 0    | 0 | Low-quality    | Genome-fragment | 5.98  | 0     |
| S12-final-viral-combined_k141_145503 | [full] | 4612  | No  | NA | 0    | 4 | Not-determined | Genome-fragment | NA    | 0     |
| S1_k141_337347                       | [full] | 2972  | No  | NA | 0    | 2 | Low-quality    | Genome-fragment | 1.1   | 0     |
| S12-final-viral-combined_k141_261893 | [full] | 3878  | No  | NA | 0    | 2 | Not-determined | Genome-fragment | NA    | 0     |
| S12-final-viral-combined_k141_262844 | [full] | 1511  | No  | NA | 0    | 0 | Not-determined | Genome-fragment | NA    | 0     |
| S12-final-viral-combined_k141_128350 | [full] | 1697  | No  | NA | 0    | 0 | Not-determined | Genome-fragment | NA    | 0     |
| S12-final-viral-combined_k141_397471 | [full] | 1108  | No  | NA | 0    | 1 | Not-determined | Genome-fragment | NA    | 0     |
| S1-final-viral-combined_k141_213804  | [full] | 2974  | No  | NA | 0    | 2 | Low-quality    | Genome-fragment | 6.02  | 0     |
| S12-final-viral-combined_k141_297012 | [full] | 2856  | No  | NA | 0    | 1 | Not-determined | Genome-fragment | NA    | 0     |
| S5-final-viral-combined_k141_133403  | [full] | 2974  | No  | NA | 3    | 0 | Low-quality    | Genome-fragment | 7.78  | 0     |
| S12-final-viral-combined_k141_145590 | [full] | 1579  | No  | NA | 0    | 0 | Not-determined | Genome-fragment | NA    | 0     |
| S12-final-viral-combined_k141_346748 | [full] | 3131  | No  | NA | 0    | 0 | Not-determined | Genome-fragment | NA    | 0     |
| S7-final-viral-combined_k141_204478  | [full] | 2974  | Yes | NA | 441  | 1 | Low-quality    | Genome-fragment | 0.34  | 85.17 |
| S12_k141_101456                      | [full] | 2974  | No  | NA | 0    | 0 | Low-quality    | Genome-fragment | 7.16  | 0     |
| S12-final-viral-combined_k141_62031  | [full] | 1196  | No  | NA | 0    | 1 | Not-determined | Genome-fragment | NA    | 0     |
| S12-final-viral-combined_k141_128429 | [full] | 1980  | No  | NA | 0    | 1 | Not-determined | Genome-fragment | NA    | 0     |
| S12-final-viral-combined_k141_46312  | [full] | 1715  | No  | NA | 0    | 0 | Not-determined | Genome-fragment | NA    | 0     |
| S8-final-viral-combined_k141_183717  | [full] | 2974  | No  | NA | 0    | 2 | Low-quality    | Genome-fragment | 0.84  | 0     |
| S9-final-viral-combined_k141_402741  | [full] | 2975  | No  | NA | 0    | 0 | Low-quality    | Genome-fragment | 7.41  | 0     |
| S1-final-viral-combined_k141_215089  | [full] | 2976  | No  | NA | 0    | 2 | Low-quality    | Genome-fragment | 6.21  | 0     |
| S12-final-viral-combined_k141_330246 | [full] | 1001  | No  | NA | 0    | 1 | Not-determined | Genome-fragment | NA    | 0     |
| S12-final-viral-combined_k141_79615  | [full] | 1543  | No  | NA | 0    | 0 | Not-determined | Genome-fragment | NA    | 0     |
| S12-final-viral-combined_k141_213104 | [full] | 1774  | No  | NA | 0    | 1 | Not-determined | Genome-fragment | NA    | 0     |
| S12-final-viral-combined_k141_397471 | [full] | 1736  | No  | NA | 0    | 1 | Not-determined | Genome-fragment | NA    | 0     |
| S12-final-viral-combined_k141_246289 | [full] | 1242  | No  | NA | 0    | 2 | Not-determined | Genome-fragment | NA    | 0     |
| S1-final-viral-combined_k141_209982  | [full] | 2976  | No  | NA | 0    | 0 | Low-quality    | Genome-fragment | 1.11  | 0     |
| S1-final-viral-combined_k141_243282  | [full] | 2976  | No  | NA | 0    | 0 | Low-quality    | Genome-fragment | 1.25  | 0     |
| S12-final-viral-combined_k141_48886  | [full] | 2976  | No  | NA | 1    | 0 | Low-quality    | Genome-fragment | 2.37  | 0     |
| S12-final-viral-combined_k141_330276 | [full] | 3533  | No  | NA | 0    | 3 | Not-determined | Genome-fragment | NA    | 0     |
| S2-final-viral-combined_k141_11776   | [full] | 2976  | No  | NA | 0    | 0 | Low-quality    | Genome-fragment | 1.99  | 0     |
| S12-final-viral-combined_k141_297051 | [full] | 2888  | No  | NA | 0    | 0 | Not-determined | Genome-fragment | NA    | 0     |
| S7_k141_12538                        | [full] | 2977  | No  | NA | 1    | 0 | Low-quality    | Genome-fragment | 4.73  | 0     |
| S8-final-viral-combined_k141_114151  | [full] | 2977  | No  | NA | 0    | 4 | Low-quality    | Genome-fragment | 1.01  | 0     |
| S12-final-viral-combined_k141_230330 | [full] | 1674  | No  | NA | 0    | 1 | Not-determined | Genome-fragment | NA    | 0     |
| S9-final-viral-combined_k141_17003   | [full] | 2978  | No  | NA | 2    | 0 | Low-quality    | Genome-fragment | 5.93  | 0     |
| S12-final-viral-combined_k141_113834 | [full] | 1820  | No  | NA | 0    | 2 | Not-determined | Genome-fragment | NA    | 0     |
| S12-final-viral-combined_k141_35463  | [full] | 11688 | No  | NA | 0    | 4 | Not-determined | Genome-fragment | NA    | 0     |
| S11-final-viral-combined_k141_56874  | [full] | 2978  | Yes | NA | 1433 | 1 | Low-quality    | Genome-fragment | 2.99  | 51.88 |
| S12-final-viral-combined_k141_179403 | [full] | 1811  | No  | NA | 0    | 0 | Not-determined | Genome-fragment | NA    | 0     |
| S12-final-viral-combined_k141_111855 | [full] | 1494  | No  | NA | 0    | 0 | Not-determined | Genome-fragment | NA    | 0     |
| S11_k141_260580                      | [full] | 2978  | No  | NA | 0    | 1 | Low-quality    | Genome-fragment | 1.28  | 0     |
| S12-final-viral-combined_k141_196598 | [full] | 4203  | No  | NA | 0    | 3 | Not-determined | Genome-fragment | NA    | 0     |
| S12-final-viral-combined_k141_79694  | [full] | 2559  | No  | NA | 0    | 1 | Not-determined | Genome-fragment | NA    | 0     |
| S12-final-viral-combined_k141_128573 | [full] | 1092  | No  | NA | 0    | 0 | Not-determined | Genome-fragment | NA    | 0     |
| S1-final-viral-combined_k141_39311   | [full] | 2978  | No  | NA | 0    | 1 | Low-quality    | Genome-fragment | 2.31  | 0     |
| S12-final-viral-combined_k141_280691 | [full] | 1191  | No  | NA | 0    | 0 | Not-determined | Genome-fragment | NA    | 0     |
| S12-final-viral-combined_k141_263961 | [full] | 5836  | No  | NA | 0    | 2 | Not-determined | Genome-fragment | NA    | 0     |
| S12-final-viral-combined_k141_62191  | [full] | 1578  | No  | NA | 0    | 0 | Not-determined | Genome-fragment | NA    | 0     |
| S12-final-viral-combined_k141_362034 | [full] | 4787  | No  | NA | 0    | 3 | Not-determined | Genome-fragment | NA    | 0     |
| S12-final-viral-combined_k141_25520  | [full] | 2978  | No  | NA | 2    | 0 | Low-quality    | Genome-fragment | 5.99  | 0     |
| S2-final-viral-combined_k141_107444  | [full] | 2978  | No  | NA | 0    | 1 | Low-quality    | Genome-fragment | 6.31  | 0     |
| S9-final-viral-combined_k141_10970   | [full] | 2979  | No  | NA | 0    | 2 | Low-quality    | Genome-fragment | 7.78  | 0     |
| S12-final-viral-combined_k141_196623 | [full] | 1072  | No  | NA | 0    | 2 | Not-determined | Genome-fragment | NA    | 0     |
| S12-final-viral-combined_k141_116661 | [full] | 1077  | No  | NA | 0    | 0 | Not-determined | Genome-fragment | NA    | 0     |
| S11-final-viral-combined_k141_196346 | [full] | 2979  | No  | NA | 0    | 0 | Low-quality    | Genome-fragment | 3.77  | 0     |
| S12-final-viral-combined_k141_79737  | [full] | 2653  | No  | NA | 0    | 4 | Not-determined | Genome-fragment | NA    | 0     |
| S17-final-viral-combined_k141_116546 | [full] | 2979  | No  | NA | 0    | 0 | Low-quality    | Genome-fragment | 6.97  | 0     |
| S12-final-viral-combined_k141_40470  | [full] | 2979  | No  | NA | 0    | 2 | Low-quality    | Genome-fragment | 5.93  | 0     |
| S12-final-viral-combined_k141_345635 | [full] | 2979  | No  | NA | 0    | 2 | Low-quality    | Genome-fragment | 4.05  | 0     |
| S8-final-viral-combined_k141_50172   | [full] | 2979  | No  | NA | 1    | 0 | Low-quality    | Genome-fragment | 7.6   | 0     |
| S12-final-viral-combined_k141_246376 | [full] | 1240  | No  | NA | 0    | 1 | Not-determined | Genome-fragment | NA    | 0     |
| S12-final-viral-combined_k141_95538  | [full] | 4947  | No  | NA | 0    | 8 | Not-determined | Genome-fragment | NA    | 0     |
| S12-final-viral-combined_k141_179531 | [full] | 1455  | No  | NA | 0    | 1 | Not-determined | Genome-fragment | NA    | 0     |
| S12-final-viral-combined_k141_213271 | [full] | 2383  | No  | NA | 0    | 1 | Not-determined | Genome-fragment | NA    | 0     |
| S12-final-viral-combined_k141_95554  | [full] | 1551  | No  | NA | 0    | 3 | Not-determined | Genome-fragment | NA    | 0     |
| S12-final-viral-combined_k141_380787 | [full] | 2185  | No  | NA | 0    | 0 | Not-determined | Genome-fragment | NA    | 0     |
| S12-final-viral-combined_k141_179570 | [full] | 1389  | No  | NA | 0    | 0 | Not-determined | Genome-fragment | NA    | 0     |
| S12-final-viral-combined_k141_173591 | [full] | 2980  | No  | NA | 0    | 0 | Low-quality    | Genome-fragment | 5.96  | 0     |
| S12-final-viral-combined_k141_62254  | [full] | 2551  | No  | NA | 0    | 3 | Not-determined | Genome-fragment | NA    | 0     |
| S17-final-viral-combined_k141_21561  | [full] | 2981  | No  | NA | 0    | 2 | Low-quality    | Genome-fragment | 2.27  | 0     |
| S1-final-viral-combined_k141_370587  | [full] | 2983  | No  | NA | 0    | 2 | Low-quality    | Genome-fragment | 1.3   | 0     |
| S12-final-viral-combined_k141_280821 | [full] | 2594  | No  | NA | 0    | 0 | Not-determined | Genome-fragment | NA    | 0     |
| S12-final-viral-combined_k141_280824 | [full] | 1066  | No  | NA | 0    | 2 | Not-determined | Genome-fragment | NA    | 0     |
| S12-final-viral-combined_k141_179626 | [full] | 2648  | No  | NA | 0    | 0 | Not-determined | Genome-fragment | NA    | 0     |
| S4_k141_148152                       | [full] | 2983  | No  | NA | 1    | 0 | Low-quality    | Genome-fragment | 4.73  | 0     |
| S8-final-viral-combined_k141_230165  | [full] | 2983  | No  | NA | 1    | 0 | Low-quality    | Genome-fragment | 3.35  | 0     |
| S12-final-viral-combined_k141_280850 | [full] | 1487  | No  | NA | 0    | 2 | Not-determined | Genome-fragment | NA    | 0     |
| S4-final-viral-combined_k141_21317   | [full] | 2984  | No  | NA | 0    | 2 | Low-quality    | Genome-fragment | 1.84  | 0     |
| S12-final-viral-combined_k141_196785 | [full] | 1773  | No  | NA | 0    | 0 | Not-determined | Genome-fragment | NA    | 0     |
| S12-final-viral-combined_k141_362132 | [full] | 1785  | No  | NA | 0    | 1 | Not-determined | Genome-fragment | NA    | 0     |
| S4-final-viral-combined_k141_166360  | [full] | 2984  | No  | NA | 0    | 1 | Low-quality    | Genome-fragment | 6.44  | 0     |
| S12-final-viral-combined_k141_297278 | [full] | 2070  | No  | NA | 0    | 1 | Not-determined | Genome-fragment | NA    | 0     |
| S1-final-viral-combined_k141_7027    | [full] | 2985  | No  | NA | 0    | 0 | Low-quality    | Genome-fragment | 4.98  | 0     |
| S12-final-viral-combined_k141_238479 | [full] | 1420  | No  | NA | 0    | 0 | Not-determined | Genome-fragment | NA    | 0     |
| S12-final-viral-combined_k141_79899  | [full] | 3251  | No  | NA | 0    | 0 | Not-determined | Genome-fragment | NA    | 0     |
| S12-final-viral-combined_k141_314686 | [full] | 1627  | No  | NA | 0    | 0 | Not-determined | Genome-fragment | NA    | 0     |
| S12-final-viral-combined_k141_297311 | [full] | 1149  | No  | NA | 0    | 1 | Not-determined | Genome-fragment | NA    | 0     |
| S12-final-viral-combined_k141_111991 | [full] | 7472  | No  | NA | 0    | 5 | Not-determined | Genome-fragment | NA    | 0     |
| S12-final-viral-combined_k141_397406 | [full] | 1492  | No  | NA | 0    | 2 | Not-determined | Genome-fragment | NA    | 0     |
| S12-final-viral-combined_k141_263238 | [full] | 5375  | No  | NA | 0    | 4 | Not-determined | Genome-fragment | NA    | 0     |
| S12-final-viral-combined_k141_196869 | [full] | 2277  | No  | NA | 0    | 2 | Not-determined | Genome-fragment | NA    | 0     |
| S7-final-viral-combined_k141_4669    | [full] | 2985  | No  | NA | 0    | 4 | Low-quality    | Genome-fragment | 2.11  | 0     |
| S12-final-viral-combined_k141_79981  | [full] | 1587  | No  | NA | 0    | 0 | Not-determined | Genome-fragment | NA    | 0     |
| S4-final-viral-combined_k141_145266  | [full] | 2985  | No  | NA | 0    | 0 | Low-quality    | Genome-fragment | 8.8   | 0     |
| S9-final-viral-combined_k141_104094  | [full] | 2986  | No  | NA | 0    | 3 | Low-quality    | Genome-fragment | 3.09  | 0     |
| S8_k141_253005                       | [full] | 2986  | No  | NA | 0    | 0 | Low-quality    | Genome-fragment | 5.64  | 0     |
| S2-final-viral-combined_k141_192841  | [full] | 2987  | Yes | NA | 2170 | 3 | Low-quality    | Genome-fragment | 27.35 | 0     |
| S4-final-viral-combined_k141_28444   | [full] | 2987  | No  | NA | 0    | 1 | Low-quality    | Genome-fragment | 5.79  | 0     |
| S12-final-viral-combined_k141_28842  | [full] | 1936  | No  | NA | 0    | 2 | Not-determined | Genome-fragment | NA    | 0     |
| S12-final-viral-combined_k141_35463  | [full] | 4207  | No  | NA | 0    | 0 | Not-determined | Genome-fragment | NA    | 0     |
| S12-final-viral-combined_k141_380902 | [full] | 1178  | No  | NA | 0    | 0 | Not-determined | Genome-fragment | NA    | 0     |
| S12-final-viral-combined_k141_213484 | [full] | 1915  | No  | NA | 0    | 2 | Not-determined | Genome-fragment | NA    | 0     |
| S3-final-viral-combined_k141_83356   | [full] | 2988  | No  | NA | 0    | 0 | Low-quality    | Genome-fragment | 4.8   | 0     |
| S12-final-viral-combined_k141_230592 | [full] | 1585  | No  |    |      |   |                |                 |       |       |



|                                              |          |        |     |    |       |    |                |                 |                 |       |       |
|----------------------------------------------|----------|--------|-----|----|-------|----|----------------|-----------------|-----------------|-------|-------|
| S12-final-viral-combined_k141_163428}}       | [full]   | 4387   | No  | NA | 0     | 3  | Not-determined | Genome-fragment | NA              | 0     |       |
| S12-final-viral-combined_k141_181041}}       | [full]   | 2593   | No  | NA | 0     | 0  | Not-determined | Genome-fragment | NA              | 0     |       |
| S12-final-viral-combined_k141_213666}}       | [full]   | 1329   | No  | NA | 0     | 0  | Not-determined | Genome-fragment | NA              | 0     |       |
| S12-final-viral-combined_k141_163430}}       | [full]   | 1937   | No  | NA | 0     | 2  | Not-determined | Genome-fragment | NA              | 0     |       |
| S12-final-viral-combined_k141_263377}}       | [full]   | 59167  | No  | NA | 21    | 1  | High-quality   | High-quality    | 97.94           | 0     |       |
| S12-final-viral-combined_k141_146165}}       | [full]   | 2578   | No  | NA | 0     | 3  | Not-determined | Genome-fragment | NA              | 0     |       |
| S12-final-viral-combined_k141_29078}}        | [full]   | 1107   | No  | NA | 0     | 1  | Not-determined | Genome-fragment | NA              | 0     |       |
| S8-final-viral-combined_k141_148231}}        | [full]   | 2997   | No  | NA | 0     | 1  | Low-quality    | Genome-fragment | 1.38            | 0     |       |
| S11-final-viral-combined_k141_251911}}       | [full]   | 2998   | No  | NA | 0     | 0  | Low-quality    | Genome-fragment | 8.16            | 0     |       |
| S12-final-viral-combined_k141_121611}}       | [full]   | 2700   | No  | NA | 0     | 0  | Not-determined | Genome-fragment | NA              | 0     |       |
| S7_k141_115390                               |          | 2999   | No  | NA | 0     | 0  | Low-quality    | Genome-fragment | 4.97            | 0     |       |
| S7_k141_237373                               |          | 3000   | No  | NA | 0     | 0  | Low-quality    | Genome-fragment | 3.42            | 0     |       |
| S12-final-viral-combined_k141_62718}}        | [full]   | 1659   | No  | NA | 0     | 2  | Not-determined | Genome-fragment | NA              | 0     |       |
| S12-final-viral-combined_k141_213726}}       | [full]   | 1682   | No  | NA | 0     | 0  | Not-determined | Genome-fragment | NA              | 0     |       |
| S12_k141_140254                              |          | 3000   | No  | NA | 2     | 0  | Low-quality    | Genome-fragment | 8               | 0     |       |
| S12-final-viral-combined_k141_95951}}        | [full]   | 1101   | No  | NA | 0     | 1  | Not-determined | Genome-fragment | NA              | 0     |       |
| S12-final-viral-combined_k141_263457}}       | [full]   | 1218   | No  | NA | 0     | 2  | Not-determined | Genome-fragment | NA              | 0     |       |
| S12-final-viral-combined_k141_297545}}       | [full]   | 135267 | Yes | NA | 52934 | 15 | 50             | Medium-quality  | Genome-fragment | 66.71 | 60.87 |
| S12-final-viral-combined_k141_213759}}       | [full]   | 6027   | No  | NA | 0     | 5  | Not-determined | Genome-fragment | NA              | 0     |       |
| S8-final-viral-combined_k141_251499}}        | [full]   | 3000   | No  | NA | 0     | 1  | Low-quality    | Genome-fragment | 4.66            | 0     |       |
| S12-final-viral-combined_k141_146283}}       | [full]   | 5356   | No  | NA | 0     | 2  | Not-determined | Genome-fragment | NA              | 0     |       |
| S1-final-viral-combined_k141_237321}}        | [full]   | 3001   | No  | NA | 0     | 1  | Low-quality    | Genome-fragment | 4.94            | 0     |       |
| S12-final-viral-combined_k141_146289}}       | [full]   | 2841   | No  | NA | 0     | 0  | Not-determined | Genome-fragment | NA              | 0     |       |
| S12-final-viral-combined_k141_112345}}       | [full]   | 1969   | No  | NA | 0     | 2  | Not-determined | Genome-fragment | NA              | 0     |       |
| S12-final-viral-combined_k141_297578}}       | [full]   | 1080   | No  | NA | 0     | 0  | Not-determined | Genome-fragment | NA              | 0     |       |
| S17-final-viral-combined_k141_164489}}       | [full]   | 3001   | No  | NA | 0     | 2  | Low-quality    | Genome-fragment | 0.69            | 0     |       |
| S12-final-viral-combined_k141_397759}}       | [full]   | 1726   | No  | NA | 0     | 0  | Not-determined | Genome-fragment | NA              | 0     |       |
| S11-final-viral-combined_k141_185782}}       | [full]   | 3002   | No  | NA | 0     | 0  | Low-quality    | Genome-fragment | 6.47            | 0     |       |
| S6_k141_212786                               |          | 3002   | No  | NA | 0     | 0  | Low-quality    | Genome-fragment | 3.2             | 0     |       |
| S12-final-viral-combined_k141_129156}}       | [full]   | 2602   | No  | NA | 0     | 1  | Not-determined | Genome-fragment | NA              | 0     |       |
| S12-final-viral-combined_k141_281375}}       | [full]   | 3606   | No  | NA | 0     | 2  | Not-determined | Genome-fragment | NA              | 0     |       |
| S5-final-viral-combined_k141_835389}}        | [2genes] | 3003   | No  | NA | 0     | 0  | Low-quality    | Genome-fragment | 7.22            | 0     |       |
| S12-final-viral-combined_k141_62784}}        | [full]   | 1603   | No  | NA | 0     | 1  | Not-determined | Genome-fragment | NA              | 0     |       |
| S5_k141_87521                                |          | 3003   | No  | NA | 0     | 0  | Low-quality    | Genome-fragment | 2.92            | 0     |       |
| S12-final-viral-combined_k141_246855}}       | [full]   | 1971   | No  | NA | 0     | 1  | Not-determined | Genome-fragment | NA              | 0     |       |
| S2_k141_168441                               |          | 3003   | No  | NA | 0     | 0  | Low-quality    | Genome-fragment | 6.48            | 0     |       |
| S1-final-viral-combined_k141_102706}}        | [full]   | 3004   | No  | NA | 3     | 0  | Low-quality    | Genome-fragment | 4.92            | 0     |       |
| S12-final-viral-combined_k141_230907}}       | [full]   | 1484   | No  | NA | 0     | 1  | Not-determined | Genome-fragment | NA              | 0     |       |
| S1_k141_384257                               |          | 3004   | No  | NA | 0     | 0  | Low-quality    | Genome-fragment | 13.07           | 0     |       |
| S12-final-viral-combined_k141_180229}}       | [full]   | 1193   | No  | NA | 0     | 1  | Not-determined | Genome-fragment | NA              | 0     |       |
| S5-final-viral-combined_k141_208581}}        | [full]   | 3004   | No  | NA | 1     | 0  | Low-quality    | Genome-fragment | 4.77            | 0     |       |
| S12-final-viral-combined_k141_197374}}       | [full]   | 5050   | No  | NA | 0     | 1  | Not-determined | Genome-fragment | NA              | 0     |       |
| S12-final-viral-combined_k141_246893}}       | [full]   | 2790   | No  | NA | 0     | 1  | Not-determined | Genome-fragment | NA              | 0     |       |
| S7-final-viral-combined_k141_335841}}        | [full]   | 3004   | No  | NA | 1     | 0  | Low-quality    | Genome-fragment | 2.84            | 0     |       |
| S12-final-viral-combined_k141_129194}}       | [full]   | 1236   | No  | NA | 0     | 1  | Not-determined | Genome-fragment | 0               | 0     |       |
| S12-final-viral-combined_k141_281458}}       | [full]   | 1581   | No  | NA | 0     | 0  | Not-determined | Genome-fragment | NA              | 0     |       |
| S8_k141_252385                               |          | 3004   | No  | NA | 0     | 2  | Low-quality    | Genome-fragment | 5.12            | 0     |       |
| S8-final-viral-combined_k141_100813}}        | [full]   | 3005   | No  | NA | 0     | 1  | Low-quality    | Genome-fragment | 5.41            | 0     |       |
| S12-final-viral-combined_k141_362561}}       | [full]   | 5419   | No  | NA | 0     | 1  | Not-determined | Genome-fragment | NA              | 0     |       |
| S1-final-viral-combined_k141_11881}}         | [full]   | 3005   | No  | NA | 1     | 0  | Low-quality    | Genome-fragment | 5.59            | 0     |       |
| S7_k141_26847                                |          | 3005   | No  | NA | 0     | 1  | Low-quality    | Genome-fragment | 2.71            | 0     |       |
| S12-final-viral-combined_k141_228156}}       | [full]   | 3006   | No  | NA | 1     | 0  | Low-quality    | Genome-fragment | 5.59            | 0     |       |
| S12-final-viral-combined_k141_263564}}       | [full]   | 1104   | No  | NA | 0     | 1  | Not-determined | Genome-fragment | NA              | 0     |       |
| S12-final-viral-combined_k141_197314}}       | [full]   | 2118   | No  | NA | 0     | 2  | Not-determined | Genome-fragment | NA              | 0     |       |
| S11_k141_54529                               |          | 3006   | No  | NA | 0     | 2  | Low-quality    | Genome-fragment | 1.97            | 0     |       |
| S3-final-viral-combined_k141_38873}}         | [full]   | 3006   | No  | NA | 2     | 0  | Low-quality    | Genome-fragment | 7.86            | 0     |       |
| S12-final-viral-combined_k141_49121}}        | [full]   | 3006   | No  | NA | 3     | 0  | Low-quality    | Genome-fragment | 7.61            | 0     |       |
| S12-final-viral-combined_k141_29313}}        | [full]   | 1117   | No  | NA | 0     | 1  | Not-determined | Genome-fragment | NA              | 0     |       |
| S12-final-viral-combined_k141_146410}}       | [full]   | 1409   | No  | NA | 0     | 1  | Not-determined | Genome-fragment | NA              | 0     |       |
| S12-final-viral-combined_k141_31542}}        | [full]   | 3006   | No  | NA | 0     | 2  | Low-quality    | Genome-fragment | 0.87            | 0     |       |
| S12-final-viral-combined_k141_128404}}       | [full]   | 1234   | No  | NA | 0     | 2  | Not-determined | Genome-fragment | NA              | 0     |       |
| S12-final-viral-combined_k141_28151}}        | [full]   | 2041   | No  | NA | 0     | 3  | Not-determined | Genome-fragment | NA              | 0     |       |
| S12-final-viral-combined_k141_347759}}       | [full]   | 1932   | No  | NA | 0     | 1  | Not-determined | Genome-fragment | NA              | 0     |       |
| S12-final-viral-combined_k141_12427}}        | [full]   | 2270   | No  | NA | 0     | 2  | Not-determined | Genome-fragment | NA              | 0     |       |
| S1_k141_376155                               |          | 3007   | No  | NA | 0     | 2  | Low-quality    | Genome-fragment | 2.83            | 0     |       |
| S12-final-viral-combined_k141_180358}}       | [full]   | 2147   | No  | NA | 0     | 0  | Not-determined | Genome-fragment | NA              | 0     |       |
| S12-final-viral-combined_k141_231085}}       | [full]   | 3222   | No  | NA | 0     | 0  | Not-determined | Genome-fragment | NA              | 0     |       |
| S12-final-viral-combined_k141_12446}}        | [full]   | 1440   | No  | NA | 0     | 1  | Not-determined | Genome-fragment | NA              | 0     |       |
| S12-final-viral-combined_k141_231101}}       | [full]   | 1216   | No  | NA | 0     | 0  | Not-determined | Genome-fragment | NA              | 0     |       |
| S17-final-viral-combined_k141_236398}}       | [full]   | 3007   | No  | NA | 0     | 0  | Low-quality    | Genome-fragment | 6.57            | 0     |       |
| S2-final-viral-combined_k141_126628}}        | [full]   | 3007   | No  | NA | 0     | 1  | Low-quality    | Genome-fragment | 2.13            | 0     |       |
| S12-final-viral-combined_k141_62886}}        | [full]   | 4517   | No  | NA | 0     | 2  | Not-determined | Genome-fragment | NA              | 0     |       |
| S12-final-viral-combined_k141_197428}}       | [full]   | 1620   | No  | NA | 0     | 2  | Not-determined | Genome-fragment | NA              | 0     |       |
| S12-final-viral-combined_k141_163821}}       | [full]   | 5388   | No  | NA | 0     | 2  | Not-determined | Genome-fragment | NA              | 0     |       |
| S8-final-viral-combined_k141_171210_2partial |          | 3007   | No  | NA | 0     | 0  | Low-quality    | Genome-fragment | 6.22            | 0     |       |
| S12-final-viral-combined_k141_80457}}        | [full]   | 3729   | No  | NA | 0     | 3  | Not-determined | Genome-fragment | NA              | 0     |       |
| S12-final-viral-combined_k141_197436}}       | [full]   | 1162   | No  | NA | 0     | 1  | Not-determined | Genome-fragment | NA              | 0     |       |
| S12-final-viral-combined_k141_281615}}       | [full]   | 1012   | No  | NA | 0     | 0  | Not-determined | Genome-fragment | NA              | 0     |       |
| S12-final-viral-combined_k141_381385}}       | [full]   | 3272   | No  | NA | 0     | 1  | Not-determined | Genome-fragment | NA              | 0     |       |
| S12-final-viral-combined_k141_112535}}       | [full]   | 1810   | No  | NA | 0     | 1  | Not-determined | Genome-fragment | NA              | 0     |       |
| S8_k141_28603                                |          | 3007   | No  | NA | 0     | 2  | Low-quality    | Genome-fragment | 0.81            | 0     |       |
| S12-final-viral-combined_k141_1295352}}      | [full]   | 10804  | No  | NA | 0     | 0  | Not-determined | Genome-fragment | NA              | 0     |       |
| S12-final-viral-combined_k141_231154}}       | [full]   | 1040   | No  | NA | 0     | 1  | Not-determined | Genome-fragment | NA              | 0     |       |
| S5_k141_184551                               |          | 3009   | No  | NA | 2     | 0  | Low-quality    | Genome-fragment | 3.92            | 0     |       |
| S12-final-viral-combined_k141_163847}}       | [full]   | 2200   | No  | NA | 0     | 2  | Not-determined | Genome-fragment | NA              | 0     |       |
| S12-final-viral-combined_k141_397951}}       | [full]   | 1812   | No  | NA | 0     | 0  | Not-determined | Genome-fragment | NA              | 0     |       |
| S12-final-viral-combined_k141_365561}}       | [full]   | 3009   | No  | NA | 0     | 0  | Low-quality    | Genome-fragment | 4.78            | 0     |       |
| S12-final-viral-combined_k141_331343}}       | [full]   | 7504   | No  | NA | 0     | 4  | Not-determined | Genome-fragment | NA              | 0     |       |
| S8-final-viral-combined_k141_178661}}        | [full]   | 3009   | No  | NA | 0     | 0  | Low-quality    | Genome-fragment | 2.53            | 0     |       |
| S8-final-viral-combined_k141_157208}}        | [full]   | 3009   | No  | NA | 0     | 2  | Low-quality    | Genome-fragment | 4.5             | 0     |       |
| S5-final-viral-combined_k141_204459}}        | [full]   | 3010   | No  | NA | 1     | 0  | Low-quality    | Genome-fragment | 7.71            | 0     |       |
| S12-final-viral-combined_k141_397960}}       | [full]   | 1277   | No  | NA | 0     | 0  | Not-determined | Genome-fragment | NA              | 0     |       |
| S2-final-viral-combined_k141_248228}}        | [full]   | 3010   | No  | NA | 0     | 1  | Low-quality    | Genome-fragment | 1.28            | 0     |       |
| S12-final-viral-combined_k141_362773}}       | [full]   | 2062   | No  | NA | 0     | 1  | Not-determined | Genome-fragment | NA              | 0     |       |
| S11-final-viral-combined_k141_212976}}       | [full]   | 3011   | No  | NA | 0     | 0  | Low-quality    | Genome-fragment | 8.15            | 0     |       |
| S12-final-viral-combined_k141_331154}}       | [full]   | 1203   | No  | NA | 0     | 1  | Not-determined | Genome-fragment | NA              | 0     |       |
| S12-final-viral-combined_k141_62948}}        | [full]   | 10597  | No  | NA | 0     | 5  | Not-determined | Genome-fragment | NA              | 0     |       |
| S12-final-viral-combined_k141_125391}}       | [full]   | 1446   | No  | NA | 0     | 2  | Not-determined | Genome-fragment | NA              | 0     |       |
| S3_k141_25854                                |          | 3011   | No  | NA | 1     | 0  | Low-quality    | Genome-fragment | 7.57            | 0     |       |
| S12-final-viral-combined_k141_112654}}       | [full]   | 1714   | No  | NA | 0     | 0  | Not-determined | Genome-fragment | NA              | 0     |       |
| S12-final-viral-combined_k141_315408}}       | [full]   | 1323   | No  | NA | 0     | 0  | Not-determined | Genome-fragment | NA              | 0     |       |
| S17-final-viral-combined_k141_155032}}       | [full]   | 3011   | No  | NA | 0     | 1  | Low-quality    | Genome-fragment | 1.27            | 0     |       |
| S8_k141_4896                                 |          | 3011   | No  | NA | 0     | 0  | Low-quality    | Genome-fragment | 6.58            | 0     |       |
| S12-final-viral-combined_k141_129420}}       | [full]   | 1343   | No  | NA | 0     | 1  | Not-determined | Genome-fragment | NA              | 0     |       |
| S12-final-viral-combined_k141_214051}}       | [full]   | 1750   | No  | NA | 0     | 1  | Not-determined | Genome-fragment | NA              | 0     |       |
| S3-final-viral-combined_k141_62421}}         | [full]   | 3012   | No  | NA | 0     | 2  | Low-quality    | Genome-fragment | 1.55            | 0     |       |
| S12-final-viral-combined_k141_231250}}       | [full]   | 1698   | No  | NA | 0     | 1  | Not-determined | Genome-fragment | NA              | 0     |       |
| S7-final-viral-combined_k141_117345}}        | [full]   | 3012   | No  | NA | 0     | 0  | Low-quality    | Genome-fragment | 7.05            | 0     |       |
| S12-final-viral-combined_k141_163846}}       | [full]   | 1201   | No  | NA | 0     | 2  | Not-determined | Genome-fragment | NA              | 0     |       |
| S12-final-viral-combined_k141_281744}}       | [full]   | 2616   | No  | NA | 0     | 0  | Not-determined | Genome-fragment | NA              | 0     |       |
| S12-final-viral-combined_k141_297804}}       | [full]   | 4791   | No  | NA | 0     | 2  | Not-determined | Genome-fragment | NA              | 0     |       |
| S12-final-viral-combined_k141_231263}}       | [full]   | 1453   | No  | NA | 0     | 1  | Not-determined | Genome-fragment | NA              | 0     |       |
| S12-final-viral-combined_k141_163962}}       | [full]   | 2098   | No  | NA | 0     | 2  | Not-determined | Genome-fragment | NA              | 0     |       |
| S12-final-viral-combined_k141_398009}}       | [full]   | 2008   | No  | NA | 0     | 1  | Not-determined | Genome-fragment | NA              | 0     |       |
| S4_k141_50598                                |          | 3012   | No  | NA | 0     | 1  | Low-quality    | Genome-fragment | 0.96            | 0     |       |
| S12-final-viral-combined_k141_197519}}       | [full]   | 2954   | No  | NA | 0     | 2  | Not-determined | Genome-fragment | NA              | 0     |       |
| S5_k141_77347                                |          | 3013   | No  | NA | 0     | 0  | Low-quality    | Genome-fragment | 6.27            | 0     |       |
| S12-final-viral-combined_k141_247964}}       | [full]   | 1078   | No  | NA | 0     | 1  | Not-determined | Genome-fragment | NA              | 0     |       |
| S12-final-viral-combined_k141_362844}}       | [full]   | 2324   | No  | NA | 0     | 2  | Not-determined | Genome-fragment | NA              | 0     |       |
| S17-final-viral-combined_k141_147736}}       | [full]   | 3013   | No  | NA | 0     | 3  | Low-quality    | Genome-fragment | 4.99            | 0     |       |
| S12-final-viral-combined_k141_388665}}       | [full]   | 3013   | No  | NA | 0     | 0  | Low-quality    | Genome-fragment | 4.95            | 0     |       |
| S12-final-viral-combined_k141_180490}}       | [full]   | 1680   | No  | NA | 0     | 0  | Not-determined | Genome-fragment | NA              | 0     |       |
| S12-final-viral-combined_k141_129498}}       | [full]   | 2633   | No  | NA | 0     | 2  | Not-determined | Genome-fragment | NA              | 0     |       |
| S12-final-viral-combined_k141_116899}}       | [full]   | 2136   | No  | NA | 0     | 2  | Not-determined | Genome-fragment | NA              | 0     |       |
| S12-final-viral-combined_k141_363863}}       | [full]   | 2132   | No  | NA | 0     | 1  | Not-determined | Genome-fragment | NA              | 0     |       |
| S12-final-viral-combined_k141_126101}}       | [full]   | 1684   | No  | NA | 0     | 1  | Not-determined | Genome-fragment | NA              | 0     |       |
| S8-final-viral-combined_k141_96950}}         | [full]   | 3014   | No  | NA | 4     | 0  | Low-quality    | Genome-fragment | 6.96            | 0     |       |
| S12-final-viral-combined_k141_398055}}       | [full]   | 1255   | No  | NA | 0     | 2  | Not-determined | Genome-fragment | NA              | 0     |       |
| S17_k141_133662                              |          | 3014   | No  | NA | 1     | 0  | Low-quality    | Genome-fragment | 4.81            | 0     |       |
| S12-final-viral-combined_k141_263735}}       | [full]   | 1450   | No  | NA |       |    |                |                 |                 |       |       |



|                                      |          |       |     |       |    |    |                |                 |    |       |       |
|--------------------------------------|----------|-------|-----|-------|----|----|----------------|-----------------|----|-------|-------|
| S12-final-viral-combined_k141_164241 | [Full]   | 6213  | No  | NA    | 0  | 3  | Not-determined | Genome-fragment | NA | 0     | 0     |
| S12-final-viral-combined_k141_263981 | [Full]   | 2757  | No  | NA    | 0  | 2  | Not-determined | Genome-fragment | NA | 0     | 0     |
| S5-final-viral-combined_k141_154739  | [Full]   | 3021  | Yes | 354   | 1  | 3  | Low-quality    | Genome-fragment | NA | 0.16  | 88.28 |
| S17-k141_155194                      |          | 3021  | No  | NA    | 0  | 2  | Low-quality    | Genome-fragment | NA | 6.35  | 0     |
| S12-final-viral-combined_k141_164253 | [Full]   | 3318  | No  | NA    | 0  | 1  | Not-determined | Genome-fragment | NA | 0     | 0     |
| S11-final-viral-combined_k141_184651 | [Full]   | 3022  | No  | NA    | 0  | 1  | Low-quality    | Genome-fragment | NA | 1.13  | 0     |
| S12-final-viral-combined_k141_231552 | [Full]   | 2049  | No  | NA    | 0  | 2  | Not-determined | Genome-fragment | NA | 0     | 0     |
| S12-final-viral-combined_k141_146830 | [Full]   | 1876  | No  | NA    | 0  | 1  | Not-determined | Genome-fragment | NA | 0     | 0     |
| S5_k141_180047                       |          | 3022  | No  | NA    | 0  | 0  | Low-quality    | Genome-fragment | NA | 4     | 0     |
| S12-final-viral-combined_k141_214254 | [Full]   | 2772  | No  | NA    | 0  | 0  | Not-determined | Genome-fragment | NA | 0     | 0     |
| S12-final-viral-combined_k141_315618 | [Full]   | 3217  | No  | NA    | 0  | 1  | Not-determined | Genome-fragment | NA | 0     | 0     |
| S12-final-viral-combined_k141_477071 | [Full]   | 1804  | No  | NA    | 0  | 1  | Not-determined | Genome-fragment | NA | 0     | 0     |
| S12-final-viral-combined_k141_348202 | [Full]   | 1520  | No  | NA    | 0  | 1  | Not-determined | Genome-fragment | NA | 0     | 0     |
| S12-final-viral-combined_k141_263989 | [Full]   | 1068  | No  | NA    | 0  | 1  | Not-determined | Genome-fragment | NA | 0     | 0     |
| S12-final-viral-combined_k141_282143 | [Full]   | 3022  | No  | NA    | 0  | 1  | Low-quality    | Genome-fragment | NA | 6.4   | 0     |
| S2-final-viral-combined_k141_239384  | [Full]   | 3022  | Yes | 1948  | 1  | 2  | Not-determined | Genome-fragment | NA | 2.46  | 35.4  |
| S17-final-viral-combined_k141_100484 | [Full]   | 3023  | No  | NA    | 0  | 3  | Low-quality    | Genome-fragment | NA | 1.31  | 0     |
| S17-k141_236933                      |          | 3023  | No  | NA    | 0  | 0  | Low-quality    | Genome-fragment | NA | 7.11  | 0     |
| S17-k141_19140                       |          | 3023  | No  | NA    | 1  | 0  | Low-quality    | Genome-fragment | NA | 7.65  | 0     |
| S8-final-viral-combined_k141_273786  | [Full]   | 3023  | No  | NA    | 0  | 1  | Low-quality    | Genome-fragment | NA | 1.37  | 0     |
| S12-final-viral-combined_k141_127789 | [Full]   | 2903  | No  | NA    | 0  | 1  | Not-determined | Genome-fragment | NA | 0     | 0     |
| S12-final-viral-combined_k141_200910 | [Full]   | 2168  | No  | NA    | 0  | 1  | Not-determined | Genome-fragment | NA | 0     | 0     |
| S12-final-viral-combined_k141_247459 | [Full]   | 2308  | No  | NA    | 0  | 2  | Not-determined | Genome-fragment | NA | 0     | 0     |
| S12-final-viral-combined_k141_282077 | [Full]   | 2557  | No  | NA    | 0  | 1  | Not-determined | Genome-fragment | NA | 0     | 0     |
| S1_k141_145386                       |          | 3025  | No  | NA    | 1  | 0  | Low-quality    | Genome-fragment | NA | 1.36  | 0     |
| S12-final-viral-combined_k141_129740 | [Full]   | 2707  | No  | NA    | 0  | 2  | Not-determined | Genome-fragment | NA | 0     | 0     |
| S3-final-viral-combined_k141_58212   | [Full]   | 3025  | No  | NA    | 0  | 2  | Low-quality    | Genome-fragment | NA | 7.86  | 0     |
| S12-final-viral-combined_k141_146863 | [Full]   | 5194  | No  | NA    | 0  | 0  | Not-determined | Genome-fragment | NA | 0     | 0     |
| S12-final-viral-combined_k141_121981 | [Full]   | 2263  | No  | NA    | 0  | 1  | Not-determined | Genome-fragment | NA | 0     | 0     |
| S12-final-viral-combined_k141_164334 | [Full]   | 1461  | No  | NA    | 0  | 1  | Not-determined | Genome-fragment | NA | 0     | 0     |
| S12-final-viral-combined_k141_197822 | [Full]   | 4931  | No  | NA    | 0  | 2  | Not-determined | Genome-fragment | NA | 0     | 0     |
| S12-final-viral-combined_k141_164388 | [Full]   | 1298  | No  | NA    | 1  | 1  | Not-determined | Genome-fragment | NA | 0     | 0     |
| S5-final-viral-combined_k141_189959  | [H2gene] | 3025  | No  | NA    | 2  | 0  | Low-quality    | Genome-fragment | NA | 1.47  | 0     |
| S12-final-viral-combined_k141_282104 | [Full]   | 4356  | No  | NA    | 0  | 3  | Not-determined | Genome-fragment | NA | 0     | 0     |
| S12-final-viral-combined_k141_197834 | [Full]   | 3431  | No  | NA    | 0  | 1  | Not-determined | Genome-fragment | NA | 0     | 0     |
| S12-final-viral-combined_k141_128141 | [Full]   | 2218  | No  | NA    | 0  | 1  | Not-determined | Genome-fragment | NA | 0     | 0     |
| S12-final-viral-combined_k141_381872 | [Full]   | 13772 | No  | NA    | 0  | 3  | Not-determined | Genome-fragment | NA | 0     | 0     |
| S12-final-viral-combined_k141_298079 | [Full]   | 2480  | No  | NA    | 0  | 2  | Not-determined | Genome-fragment | NA | 0     | 0     |
| S8-final-viral-combined_k141_177778  | [Full]   | 3025  | Yes | 1751  | 1  | 1  | Low-quality    | Genome-fragment | NA | 4.08  | 42.12 |
| S9_k141_56516                        |          | 3026  | Yes | 777   | 1  | 1  | Low-quality    | Genome-fragment | NA | 1.46  | 74.32 |
| S12-final-viral-combined_k141_180831 | [Full]   | 1604  | No  | NA    | 0  | 2  | Not-determined | Genome-fragment | NA | 0     | 0     |
| S9_k141_127778                       |          | 3026  | No  | NA    | 2  | 0  | Low-quality    | Genome-fragment | NA | 7.62  | 0     |
| S3-final-viral-combined_k141_115846  | [Full]   | 3026  | No  | NA    | 0  | 2  | Low-quality    | Genome-fragment | NA | 0.58  | 0     |
| S12-final-viral-combined_k141_214351 | [Full]   | 1025  | No  | NA    | 0  | 0  | Not-determined | Genome-fragment | NA | 0     | 0     |
| S12-final-viral-combined_k141_113038 | [Full]   | 1637  | No  | NA    | 0  | 1  | Not-determined | Genome-fragment | NA | 0     | 0     |
| S17-final-viral-combined_k141_165129 | [Full]   | 3026  | No  | NA    | 0  | 2  | Low-quality    | Genome-fragment | NA | 2.89  | 0     |
| S17-final-viral-combined_k141_41517  | [Full]   | 3026  | No  | NA    | 2  | 0  | Low-quality    | Genome-fragment | NA | 8.29  | 0     |
| S12-final-viral-combined_k141_363169 | [Full]   | 4728  | No  | NA    | 0  | 0  | Not-determined | Genome-fragment | NA | 0     | 0     |
| S12-final-viral-combined_k141_315758 | [Full]   | 2023  | No  | NA    | 0  | 1  | Not-determined | Genome-fragment | NA | 0     | 0     |
| S17-k141_86449                       |          | 3026  | No  | NA    | 1  | 0  | Low-quality    | Genome-fragment | NA | 6.53  | 0     |
| S12-final-viral-combined_k141_131078 | [Full]   | 1705  | No  | NA    | 0  | 0  | Not-determined | Genome-fragment | NA | 0     | 0     |
| S12-final-viral-combined_k141_197918 | [Full]   | 2789  | No  | NA    | 0  | 2  | Not-determined | Genome-fragment | NA | 0     | 0     |
| S12-final-viral-combined_k141_231691 | [Full]   | 1019  | No  | NA    | 0  | 0  | Not-determined | Genome-fragment | NA | 0     | 0     |
| S12-final-viral-combined_k141_247576 | [Full]   | 1600  | No  | NA    | 0  | 0  | Not-determined | Genome-fragment | NA | 0     | 0     |
| S12-final-viral-combined_k141_264074 | [Full]   | 1231  | No  | NA    | 0  | 1  | Not-determined | Genome-fragment | NA | 0     | 0     |
| S12_k141_16557                       |          | 3026  | No  | NA    | 0  | 1  | Low-quality    | Genome-fragment | NA | 5.9   | 0     |
| S12-final-viral-combined_k141_63322  | [Full]   | 3565  | No  | NA    | 0  | 1  | Not-determined | Genome-fragment | NA | 0     | 0     |
| S6_k141_116762                       |          | 3027  | No  | NA    | 0  | 2  | Low-quality    | Genome-fragment | NA | 0.43  | 0     |
| S1-final-viral-combined_k141_131500  | [Full]   | 3028  | No  | NA    | 0  | 3  | Low-quality    | Genome-fragment | NA | 1.47  | 0     |
| S12-final-viral-combined_k141_363245 | [Full]   | 1800  | No  | NA    | 0  | 0  | Not-determined | Genome-fragment | NA | 0     | 0     |
| S12-final-viral-combined_k141_214422 | [Full]   | 3679  | No  | NA    | 0  | 2  | Not-determined | Genome-fragment | NA | 0     | 0     |
| S12-final-viral-combined_k141_36781  | [Full]   | 3501  | No  | NA    | 0  | 0  | Not-determined | Genome-fragment | NA | 0     | 0     |
| S12-final-viral-combined_k141_197946 | [Full]   | 9220  | No  | NA    | 0  | 7  | Not-determined | Genome-fragment | NA | 0     | 0     |
| S12-final-viral-combined_k141_264077 | [Full]   | 32216 | No  | NA    | 8  | 1  | Medium-quality | Genome-fragment | NA | 60.94 | 0     |
| S12-final-viral-combined_k141_247647 | [Full]   | 2174  | No  | NA    | 0  | 0  | Not-determined | Genome-fragment | NA | 0     | 0     |
| S12-final-viral-combined_k141_146844 | [Full]   | 1193  | No  | NA    | 0  | 1  | Not-determined | Genome-fragment | NA | 0     | 0     |
| S12-final-viral-combined_k141_315852 | [Full]   | 1472  | No  | NA    | 0  | 1  | Not-determined | Genome-fragment | NA | 0     | 0     |
| S12-final-viral-combined_k141_180924 | [Full]   | 7751  | No  | NA    | 0  | 6  | Not-determined | Genome-fragment | NA | 0     | 0     |
| S7-final-viral-combined_k141_152066  | [Full]   | 3028  | No  | NA    | 0  | 1  | Low-quality    | Genome-fragment | NA | 5.52  | 0     |
| S12-final-viral-combined_k141_47819  | [Full]   | 3896  | No  | NA    | 0  | 2  | Not-determined | Genome-fragment | NA | 0     | 0     |
| S2_k141_175743                       |          | 3028  | No  | NA    | 0  | 1  | Low-quality    | Genome-fragment | NA | 2.97  | 0     |
| S12-final-viral-combined_k141_363282 | [Full]   | 3112  | No  | NA    | 0  | 2  | Not-determined | Genome-fragment | NA | 0     | 0     |
| S6_k141_98410                        |          | 3028  | No  | NA    | 1  | 0  | Low-quality    | Genome-fragment | NA | 3.07  | 0     |
| S8-final-viral-combined_k141_256488  | [Full]   | 3028  | No  | NA    | 0  | 1  | Low-quality    | Genome-fragment | NA | 7.69  | 0     |
| S1-final-viral-combined_k141_273238  | [Full]   | 3029  | No  | NA    | 0  | 1  | Low-quality    | Genome-fragment | NA | 3.57  | 0     |
| S1_k141_73152                        |          | 3029  | No  | NA    | 1  | 0  | Low-quality    | Genome-fragment | NA | 3.61  | 0     |
| S12-final-viral-combined_k141_180947 | [Full]   | 2725  | No  | NA    | 0  | 3  | Not-determined | Genome-fragment | NA | 0     | 0     |
| S12-final-viral-combined_k141_231802 | [Full]   | 1896  | No  | NA    | 0  | 1  | Not-determined | Genome-fragment | NA | 0     | 0     |
| S12-final-viral-combined_k141_198000 | [Full]   | 3081  | No  | NA    | 0  | 0  | Not-determined | Genome-fragment | NA | 0     | 0     |
| S7-final-viral-combined_k141_243623  | [Full]   | 3029  | No  | NA    | 0  | 0  | Low-quality    | Genome-fragment | NA | 3.76  | 0     |
| S12-final-viral-combined_k141_164553 | [Full]   | 1684  | No  | NA    | 0  | 1  | Not-determined | Genome-fragment | NA | 0     | 0     |
| S4-final-viral-combined_k141_401401  | [Full]   | 3029  | No  | NA    | 0  | 1  | Low-quality    | Genome-fragment | NA | 2.09  | 0     |
| S8-final-viral-combined_k141_207261  | [Full]   | 3029  | No  | NA    | 0  | 0  | Low-quality    | Genome-fragment | NA | 8.38  | 0     |
| S12-final-viral-combined_k141_282330 | [Full]   | 1326  | No  | NA    | 0  | 0  | Not-determined | Genome-fragment | NA | 0     | 0     |
| S9-final-viral-combined_k141_435577  | [Full]   | 3030  | No  | NA    | 0  | 0  | Low-quality    | Genome-fragment | NA | 7.59  | 0     |
| S12-final-viral-combined_k141_129799 | [Full]   | 86035 | Yes | 43504 | 19 | 24 | Complete       | High-quality    | NA | 100   | 49.43 |
| S12-final-viral-combined_k141_196857 | [Full]   | 2210  | No  | NA    | 0  | 0  | Not-determined | Genome-fragment | NA | 0     | 0     |
| S1-final-viral-combined_k141_153822  | [Full]   | 3030  | No  | NA    | 0  | 3  | Low-quality    | Genome-fragment | NA | 6.88  | 0     |
| S1-final-viral-combined_k141_230001  | [Full]   | 3030  | No  | NA    | 0  | 2  | Low-quality    | Genome-fragment | NA | 2.12  | 0     |
| S1-final-viral-combined_k141_336039  | [Full]   | 3030  | No  | NA    | 0  | 2  | Low-quality    | Genome-fragment | NA | 2.76  | 0     |
| S12-final-viral-combined_k141_131003 | [Full]   | 1264  | No  | NA    | 0  | 0  | Not-determined | Genome-fragment | NA | 0     | 0     |
| S3-final-viral-combined_k141_160894  | [Full]   | 3030  | No  | NA    | 0  | 0  | Low-quality    | Genome-fragment | NA | 9.12  | 0     |
| S12-final-viral-combined_k141_315917 | [Full]   | 2540  | No  | NA    | 1  | 2  | Not-determined | Genome-fragment | NA | 0     | 0     |
| S12-final-viral-combined_k141_181030 | [Full]   | 4725  | No  | NA    | 0  | 2  | Not-determined | Genome-fragment | NA | 0     | 0     |
| S12_k141_253156                      |          | 3030  | No  | NA    | 0  | 0  | Low-quality    | Genome-fragment | NA | 9.34  | 0     |
| S17-final-viral-combined_k141_124415 | [Full]   | 3031  | No  | NA    | 0  | 0  | Low-quality    | Genome-fragment | NA | 2.61  | 0     |
| S12-final-viral-combined_k141_331792 | [Full]   | 3604  | No  | NA    | 0  | 0  | Not-determined | Genome-fragment | NA | 0     | 0     |
| S4_k141_28899                        |          | 3031  | No  | NA    | 0  | 3  | Low-quality    | Genome-fragment | NA | 7.12  | 0     |
| S12-final-viral-combined_k141_478871 | [Full]   | 1435  | No  | NA    | 0  | 0  | Not-determined | Genome-fragment | NA | 0     | 0     |
| S12-final-viral-combined_k141_381999 | [Full]   | 3653  | No  | NA    | 0  | 2  | Not-determined | Genome-fragment | NA | 0     | 0     |
| S12-final-viral-combined_k141_478961 | [Full]   | 2578  | No  | NA    | 0  | 1  | Not-determined | Genome-fragment | NA | 0     | 0     |
| S4_k141_98576                        |          | 3031  | No  | NA    | 0  | 2  | Low-quality    | Genome-fragment | NA | 0.86  | 0     |
| S12-final-viral-combined_k141_363325 | [Full]   | 1383  | No  | NA    | 0  | 0  | Not-determined | Genome-fragment | NA | 0     | 0     |
| S8-final-viral-combined_k141_54404   | [Full]   | 3031  | Yes | 1419  | 1  | 1  | Low-quality    | Genome-fragment | NA | 3.24  | 53.18 |
| S12-final-viral-combined_k141_198096 | [Full]   | 1917  | No  | NA    | 0  | 1  | Not-determined | Genome-fragment | NA | 0     | 0     |
| S12-final-viral-combined_k141_363344 | [Full]   | 2974  | No  | NA    | 0  | 2  | Not-determined | Genome-fragment | NA | 0     | 0     |
| S9-final-viral-combined_k141_83427   | [Full]   | 3032  | No  | NA    | 0  | 3  | Low-quality    | Genome-fragment | NA | 5.03  | 0     |
| S12-final-viral-combined_k141_298258 | [Full]   | 3034  | No  | NA    | 0  | 2  | Not-determined | Genome-fragment | NA | 0     | 0     |
| S12-final-viral-combined_k141_81020  | [Full]   | 2422  | No  | NA    | 0  | 2  | Not-determined | Genome-fragment | NA | 0     | 0     |
| S12-final-viral-combined_k141_301201 | [Full]   | 8868  | No  | NA    | 0  | 1  | Not-determined | Genome-fragment | NA | 0     | 0     |
| S12-final-viral-combined_k141_181120 | [Full]   | 5663  | No  | NA    | 0  | 2  | Not-determined | Genome-fragment | NA | 0     | 0     |
| S12-final-viral-combined_k141_365591 | [Full]   | 1916  | No  | NA    | 0  | 0  | Not-determined | Genome-fragment | NA | 0     | 0     |
| S12-final-viral-combined_k141_247836 | [Full]   | 3086  | No  | NA    | 0  | 0  | Not-determined | Genome-fragment | NA | 0     | 0     |
| S11-final-viral-combined_k141_179046 | [Full]   | 3032  | No  | NA    | 1  | 0  | Low-quality    | Genome-fragment | NA | 6.62  | 0     |
| S12-final-viral-combined_k141_131251 | [Full]   | 1287  | No  | NA    | 0  | 0  | Not-determined | Genome-fragment | NA | 0     | 0     |
| S1-final-viral-combined_k141_40195   | [Full]   | 3032  | No  | NA    | 4  | 0  | Low-quality    | Genome-fragment | NA | 5.64  | 0     |
| S1_k141_290738                       |          | 3032  | No  | NA    | 1  | 0  | Low-quality    | Genome-fragment | NA | 1.25  | 0     |
| S12-final-viral-combined_k141_181144 | [Full]   | 1765  | No  | NA    | 0  | 1  | Not-determined | Genome-fragment | NA | 0     | 0     |
| S12-final-viral-combined_k141_382063 | [Full]   | 3483  | No  | NA    | 0  | 4  | Not-determined | Genome-fragment | NA | 0     | 0     |
| S12-final-viral-combined_k141_30146  | [Full]   | 3443  | No  | NA    | 0  | 0  | Not-determined | Genome-fragment | NA | 0     | 0     |
| S12-final-viral-combined_k141_13357  | [Full]   | 4198  | No  | NA    | 0  | 2  | Not-determined | Genome-fragment | NA | 0     | 0     |
| S12-final-viral-combined_k141_386335 | [Full]   | 1066  | No  | NA    | 0  |    |                |                 |    |       |       |



|                                      |        |       |     |       |    |    |                |                 |    |       |       |
|--------------------------------------|--------|-------|-----|-------|----|----|----------------|-----------------|----|-------|-------|
| S12-final-viral-combined_k141_214940 | [full] | 1776  | No  | NA    | 0  | 0  | Not-determined | Genome-fragment | NA | 0     | 0     |
| S12_k141_140912                      | No     | 3017  | No  | NA    | 0  | 2  | Low-quality    | Genome-fragment | NA | 0.99  | 0     |
| S12-final-viral-combined_k141_113546 | [full] | 6996  | No  | NA    | 0  | 2  | Not-determined | Genome-fragment | NA | 0     | 0     |
| S12-final-viral-combined_k141_207876 | [full] | 3017  | No  | NA    | 0  | 3  | Low-quality    | Genome-fragment | NA | 1.47  | 0     |
| S8-final-viral-combined_k141_141859  | [full] | 3017  | No  | NA    | 2  | 0  | Low-quality    | Genome-fragment | NA | 5.36  | 0     |
| S12-final-viral-combined_k141_331151 | [full] | 2651  | No  | NA    | 0  | 4  | Not-determined | Genome-fragment | NA | 0     | 0     |
| S12-final-viral-combined_k141_181434 | [full] | 1843  | No  | NA    | 0  | 2  | Not-determined | Genome-fragment | NA | 0     | 0     |
| S9_k141_56766                        |        | 3038  | No  | NA    | 0  | 3  | Low-quality    | Genome-fragment | NA | 1.14  | 0     |
| S3_k141_135787                       |        | 3038  | No  | NA    | 0  | 2  | Low-quality    | Genome-fragment | NA | 1.06  | 0     |
| S12-final-viral-combined_k141_363561 | [full] | 9583  | Yes | 7172  | 1  | 1  | Not-determined | Genome-fragment | NA | 25.16 | 0     |
| S12-final-viral-combined_k141_282594 | [full] | 93773 | Yes | 40043 | 6  | 28 | Medium-quality | Genome-fragment | NA | 52.76 | 57.3  |
| S12-final-viral-combined_k141_812160 | [full] | 3921  | No  | NA    | 0  | 1  | Not-determined | Genome-fragment | NA | 0     | 0     |
| S7-final-viral-combined_k141_60704   | [full] | 3038  | No  | NA    | 0  | 1  | Low-quality    | Genome-fragment | NA | 2.14  | 0     |
| S12-final-viral-combined_k141_147318 | [full] | 1753  | No  | NA    | 0  | 0  | Not-determined | Genome-fragment | NA | 0     | 0     |
| S12-final-viral-combined_k141_298595 | [full] | 5072  | No  | NA    | 0  | 2  | Not-determined | Genome-fragment | NA | 0     | 0     |
| S12-final-viral-combined_k141_115647 | [full] | 1756  | No  | NA    | 0  | 0  | Not-determined | Genome-fragment | NA | 0     | 0     |
| S12-final-viral-combined_k141_130241 | [full] | 1033  | No  | NA    | 0  | 0  | Not-determined | Genome-fragment | NA | 0     | 0     |
| S12-final-viral-combined_k141_210010 | [full] | 3038  | No  | NA    | 0  | 3  | Low-quality    | Genome-fragment | NA | 8.54  | 0     |
| S12-final-viral-combined_k141_332192 | [full] | 1951  | No  | NA    | 0  | 0  | Not-determined | Genome-fragment | NA | 0     | 0     |
| S12-final-viral-combined_k141_482559 | [full] | 7925  | No  | NA    | 0  | 4  | Not-determined | Genome-fragment | NA | 0     | 0     |
| S12-final-viral-combined_k141_332195 | [full] | 3248  | No  | NA    | 0  | 1  | Not-determined | Genome-fragment | NA | 0     | 0     |
| S9_k141_76540                        |        | 3059  | No  | NA    | 1  | 0  | Low-quality    | Genome-fragment | NA | 7.1   | 0     |
| S1-final-viral-combined_k141_221894  | [full] | 3039  | No  | NA    | 2  | 0  | Low-quality    | Genome-fragment | NA | 3.15  | 0     |
| S12-final-viral-combined_k141_130280 | [full] | 2702  | No  | NA    | 0  | 2  | Not-determined | Genome-fragment | NA | 0     | 0     |
| S12-final-viral-combined_k141_97265  | [full] | 2971  | No  | NA    | 0  | 3  | Not-determined | Genome-fragment | NA | 0     | 0     |
| S12-final-viral-combined_k141_135301 | [full] | 1028  | No  | NA    | 0  | 0  | Not-determined | Genome-fragment | NA | 0     | 0     |
| S12-final-viral-combined_k141_298686 | [full] | 8811  | No  | NA    | 0  | 4  | Not-determined | Genome-fragment | NA | 7.23  | 0     |
| S1_k141_24755                        |        | 3039  | No  | NA    | 0  | 2  | Low-quality    | Genome-fragment | NA | 0     | 0     |
| S12-final-viral-combined_k141_264425 | [full] | 4657  | No  | NA    | 13 | 1  | High-quality   | High-quality    | NA | 190   | 0     |
| S12-final-viral-combined_k141_316430 | [full] | 1243  | No  | NA    | 0  | 1  | Not-determined | Genome-fragment | NA | 0     | 0     |
| S12-final-viral-combined_k141_164916 | [full] | 1934  | No  | NA    | 0  | 1  | Not-determined | Genome-fragment | NA | 0     | 0     |
| S12-final-viral-combined_k141_264445 | [full] | 1316  | No  | NA    | 0  | 2  | Not-determined | Genome-fragment | NA | 0     | 0     |
| S12-final-viral-combined_k141_181525 | [full] | 1024  | No  | NA    | 0  | 0  | Not-determined | Genome-fragment | NA | 0     | 0     |
| S3_k141_70888                        |        | 3039  | No  | NA    | 0  | 1  | Low-quality    | Genome-fragment | NA | 5.92  | 0     |
| S17-final-viral-combined_k141_140907 | [full] | 3039  | No  | NA    | 0  | 0  | Low-quality    | Genome-fragment | NA | 7.02  | 0     |
| S12-final-viral-combined_k141_50420  | [full] | 3039  | No  | NA    | 0  | 2  | Low-quality    | Genome-fragment | NA | 1.43  | 0     |
| S12-final-viral-combined_k141_361701 | [full] | 2239  | No  | NA    | 0  | 1  | Not-determined | Genome-fragment | NA | 0     | 0     |
| S12-final-viral-combined_k141_298753 | [full] | 1659  | No  | NA    | 0  | 0  | Not-determined | Genome-fragment | NA | 0     | 0     |
| S12-final-viral-combined_k141_164972 | [full] | 1715  | No  | NA    | 0  | 0  | Not-determined | Genome-fragment | NA | 0     | 0     |
| S8-final-viral-combined_k141_55332   | [full] | 3039  | No  | NA    | 0  | 1  | Low-quality    | Genome-fragment | NA | 3.24  | 0     |
| S3-final-viral-combined_k141_63451   | [full] | 3040  | No  | NA    | 0  | 3  | Low-quality    | Genome-fragment | NA | 1.53  | 0     |
| S12-final-viral-combined_k141_113756 | [full] | 2402  | No  | NA    | 0  | 0  | Not-determined | Genome-fragment | NA | 0     | 0     |
| S12-final-viral-combined_k141_332298 | [full] | 2001  | No  | NA    | 0  | 1  | Not-determined | Genome-fragment | NA | 0     | 0     |
| S12-final-viral-combined_k141_363714 | [full] | 3614  | No  | NA    | 0  | 1  | Not-determined | Genome-fragment | NA | 0     | 0     |
| S17-final-viral-combined_k141_47675  | [full] | 2040  | Yes | 2019  | 2  | 1  | Low-quality    | Genome-fragment | NA | 7.04  | 33.59 |
| S12-final-viral-combined_k141_97159  | [full] | 3751  | No  | NA    | 0  | 2  | Not-determined | Genome-fragment | NA | 0     | 0     |
| S3_k141_630                          |        | 3041  | No  | NA    | 0  | 1  | Low-quality    | Genome-fragment | NA | 5.66  | 0     |
| S12-final-viral-combined_k141_186497 | [full] | 3041  | Yes | 1168  | 1  | 1  | Low-quality    | Genome-fragment | NA | 2.87  | 61.59 |
| S2-final-viral-combined_k141_72828   | [full] | 3041  | No  | NA    | 0  | 0  | Low-quality    | Genome-fragment | NA | 6.9   | 0     |
| S11-final-viral-combined_k141_324092 | [full] | 3042  | No  | NA    | 0  | 3  | Low-quality    | Genome-fragment | NA | 1.74  | 0     |
| S1-final-viral-combined_k141_278162  | [full] | 3042  | No  | NA    | 0  | 0  | Low-quality    | Genome-fragment | NA | 2.49  | 0     |
| S1_k141_205219                       |        | 2042  | No  | NA    | 2  | 0  | Low-quality    | Genome-fragment | NA | 7.68  | 0     |
| S12-final-viral-combined_k141_316505 | [full] | 5744  | No  | NA    | 0  | 4  | Not-determined | Genome-fragment | NA | 0     | 0     |
| S12-final-viral-combined_k141_348967 | [full] | 3923  | No  | NA    | 0  | 3  | Not-determined | Genome-fragment | NA | 0     | 0     |
| S7-final-viral-combined_k141_157570  | [full] | 2042  | No  | NA    | 0  | 2  | Low-quality    | Genome-fragment | NA | 5.18  | 0     |
| S12-final-viral-combined_k141_398676 | [full] | 2270  | No  | NA    | 0  | 2  | Not-determined | Genome-fragment | NA | 0     | 0     |
| S4-final-viral-combined_k141_80275   | [full] | 3042  | No  | NA    | 1  | 0  | Low-quality    | Genome-fragment | NA | 6.72  | 0     |
| S7-final-viral-combined_k141_79970   | [full] | 3043  | No  | NA    | 0  | 1  | Low-quality    | Genome-fragment | NA | 3.2   | 0     |
| S12-final-viral-combined_k141_282826 | [full] | 1303  | No  | NA    | 0  | 0  | Not-determined | Genome-fragment | NA | 0     | 0     |
| S12-final-viral-combined_k141_147453 | [full] | 1385  | No  | NA    | 0  | 1  | Not-determined | Genome-fragment | NA | 0     | 0     |
| S12-final-viral-combined_k141_63890  | [full] | 2266  | No  | NA    | 0  | 0  | Not-determined | Genome-fragment | NA | 0     | 0     |
| S12_k141_167233                      |        | 3043  | No  | NA    | 0  | 0  | Not-determined | Genome-fragment | NA | 7.73  | 0     |
| S12-final-viral-combined_k141_63900  | [full] | 1252  | No  | NA    | 0  | 1  | Not-determined | Genome-fragment | NA | 0     | 0     |
| S12-final-viral-combined_k141_147467 | [full] | 3095  | No  | NA    | 0  | 3  | Not-determined | Genome-fragment | NA | 0     | 0     |
| S8-final-viral-combined_k141_275540  | [full] | 3043  | No  | NA    | 0  | 0  | Low-quality    | Genome-fragment | NA | 8.98  | 0     |
| S12-final-viral-combined_k141_48446  | [full] | 6461  | No  | NA    | 0  | 3  | Not-determined | Genome-fragment | NA | 0     | 0     |
| S12-final-viral-combined_k141_63932  | [full] | 1662  | No  | NA    | 0  | 1  | Not-determined | Genome-fragment | NA | 0     | 0     |
| S12-final-viral-combined_k141_232454 | [full] | 1793  | No  | NA    | 0  | 0  | Not-determined | Genome-fragment | NA | 0     | 0     |
| S12-final-viral-combined_k141_198603 | [full] | 3550  | No  | NA    | 0  | 0  | Not-determined | Genome-fragment | NA | 0     | 0     |
| S12-final-viral-combined_k141_97440  | [full] | 1955  | No  | NA    | 0  | 1  | Not-determined | Genome-fragment | NA | 0     | 0     |
| S12-final-viral-combined_k141_282842 | [full] | 2254  | No  | NA    | 0  | 2  | Not-determined | Genome-fragment | NA | 5.05  | 0     |
| S9-final-viral-combined_k141_50920   | [full] | 3044  | No  | NA    | 0  | 3  | Low-quality    | Genome-fragment | NA | 0     | 0     |
| S12-final-viral-combined_k141_232466 | [full] | 1481  | No  | NA    | 0  | 1  | Not-determined | Genome-fragment | NA | 0     | 0     |
| S12-final-viral-combined_k141_398705 | [full] | 1311  | No  | NA    | 0  | 0  | Not-determined | Genome-fragment | NA | 0     | 0     |
| S9-final-viral-combined_k141_242481  | [full] | 3044  | No  | NA    | 0  | 0  | Low-quality    | Genome-fragment | NA | 8.11  | 0     |
| S12-final-viral-combined_k141_248343 | [full] | 1929  | No  | NA    | 0  | 1  | Not-determined | Genome-fragment | NA | 0     | 0     |
| S11-final-viral-combined_k141_209946 | [full] | 3044  | No  | NA    | 1  | 0  | Low-quality    | Genome-fragment | NA | 4.61  | 0     |
| S12-final-viral-combined_k141_130456 | [full] | 3001  | No  | NA    | 0  | 0  | Not-determined | Genome-fragment | NA | 0     | 0     |
| S12-final-viral-combined_k141_305231 | [full] | 1413  | No  | NA    | 0  | 0  | Not-determined | Genome-fragment | NA | 0     | 0     |
| S1-final-viral-combined_k141_353133  | [full] | 3044  | No  | NA    | 0  | 3  | Low-quality    | Genome-fragment | NA | 0.6   | 0     |
| S12-final-viral-combined_k141_332480 | [full] | 1346  | No  | NA    | 0  | 0  | Not-determined | Genome-fragment | NA | 0     | 0     |
| S12-final-viral-combined_k141_305241 | [full] | 6860  | No  | NA    | 0  | 1  | Not-determined | Genome-fragment | NA | 0     | 0     |
| S4-final-viral-combined_k141_6622    | [full] | 3044  | No  | NA    | 0  | 2  | Low-quality    | Genome-fragment | NA | 0.86  | 0     |
| S1-final-viral-combined_k141_20001   | [full] | 3045  | No  | NA    | 0  | 0  | Low-quality    | Genome-fragment | NA | 5.29  | 0     |
| S1-final-viral-combined_k141_201217  | [full] | 3045  | No  | NA    | 0  | 1  | Low-quality    | Genome-fragment | NA | 4.26  | 0     |
| S5-final-viral-combined_k141_10407   | [full] | 3045  | No  | NA    | 0  | 1  | Low-quality    | Genome-fragment | NA | 1.43  | 0     |
| S17-final-viral-combined_k141_16547  | [full] | 3045  | No  | NA    | 2  | 0  | Low-quality    | Genome-fragment | NA | 7.34  | 0     |
| S17-final-viral-combined_k141_274054 | [full] | 3046  | No  | NA    | 0  | 1  | Low-quality    | Genome-fragment | NA | 4.07  | 0     |
| S17-final-viral-combined_k141_98756  | [full] | 3046  | No  | NA    | 0  | 1  | Low-quality    | Genome-fragment | NA | 1.64  | 0     |
| S4-final-viral-combined_k141_59155   | [full] | 3046  | No  | NA    | 0  | 0  | Low-quality    | Genome-fragment | NA | 2.02  | 0     |
| S1_k141_13823                        |        | 3047  | No  | NA    | 0  | 0  | Low-quality    | Genome-fragment | NA | 5.01  | 0     |
| S12-final-viral-combined_k141_30559  | [full] | 5005  | No  | NA    | 1  | 1  | Not-determined | Genome-fragment | NA | 0     | 0     |
| S12-final-viral-combined_k141_165054 | [full] | 1649  | No  | NA    | 0  | 2  | Not-determined | Genome-fragment | NA | 0     | 0     |
| S12-final-viral-combined_k141_282985 | [full] | 4681  | No  | NA    | 0  | 0  | Not-determined | Genome-fragment | NA | 0     | 0     |
| S12-final-viral-combined_k141_298949 | [full] | 3152  | No  | NA    | 0  | 1  | Not-determined | Genome-fragment | NA | 0     | 0     |
| S5_k141_154321                       |        | 3047  | No  | NA    | 0  | 3  | Low-quality    | Genome-fragment | NA | 1.15  | 0     |
| S12-final-viral-combined_k141_97586  | [full] | 3376  | No  | NA    | 0  | 3  | Not-determined | Genome-fragment | NA | 0     | 0     |
| S4-final-viral-combined_k141_45560   | [full] | 3047  | No  | NA    | 0  | 2  | Low-quality    | Genome-fragment | NA | 2.59  | 0     |
| S17-final-viral-combined_k141_137671 | [full] | 3048  | No  | NA    | 0  | 0  | Low-quality    | Genome-fragment | NA | 8.18  | 0     |
| S12-final-viral-combined_k141_97588  | [full] | 3059  | No  | NA    | 0  | 0  | Not-determined | Genome-fragment | NA | 0     | 0     |
| S12-final-viral-combined_k141_181744 | [full] | 1268  | No  | NA    | 0  | 1  | Not-determined | Genome-fragment | NA | 0     | 0     |
| S12-final-viral-combined_k141_131992 | [full] | 3350  | No  | NA    | 0  | 2  | Not-determined | Genome-fragment | NA | 0     | 0     |
| S12-final-viral-combined_k141_30585  | [full] | 1707  | No  | NA    | 0  | 2  | Not-determined | Genome-fragment | NA | 0     | 0     |
| S12-final-viral-combined_k141_64022  | [full] | 3211  | No  | NA    | 0  | 2  | Not-determined | Genome-fragment | NA | 0     | 0     |
| S11-final-viral-combined_k141_278828 | [full] | 3049  | No  | NA    | 0  | 0  | Low-quality    | Genome-fragment | NA | 6.45  | 0     |
| S11_k141_133717                      |        | 3049  | No  | NA    | 0  | 3  | Low-quality    | Genome-fragment | NA | 1.12  | 0     |
| S12-final-viral-combined_k141_298996 | [full] | 2251  | No  | NA    | 0  | 0  | Not-determined | Genome-fragment | NA | 0     | 0     |
| S12-final-viral-combined_k141_147568 | [full] | 4362  | No  | NA    | 0  | 3  | Not-determined | Genome-fragment | NA | 0     | 0     |
| S12-final-viral-combined_k141_97624  | [full] | 1886  | No  | NA    | 0  | 1  | Not-determined | Genome-fragment | NA | 0     | 0     |
| S12-final-viral-combined_k141_332610 | [full] | 1109  | No  | NA    | 0  | 1  | Not-determined | Genome-fragment | NA | 0     | 0     |
| S12-final-viral-combined_k141_13859  | [full] | 1516  | No  | NA    | 0  | 1  | Not-determined | Genome-fragment | NA | 0     | 0     |
| S12-final-viral-combined_k141_48540  | [full] | 2314  | No  | NA    | 0  | 2  | Not-determined | Genome-fragment | NA | 0     | 0     |
| S12-final-viral-combined_k141_30624  | [full] | 7186  | No  | NA    | 0  | 1  | Not-determined | Genome-fragment | NA | 0     | 0     |
| S12-final-viral-combined_k141_212856 | [full] | 3049  | No  | NA    | 0  | 2  | Low-quality    | Genome-fragment | NA | 0.51  | 0     |
| S2-final-viral-combined_k141_35070   | [full] | 3049  | No  | NA    | 0  | 1  | Low-quality    | Genome-fragment | NA | 1.79  | 0     |
| S12_k141_357369                      |        | 3050  | No  | NA    | 0  | 0  | Low-quality    | Genome-fragment | NA | 1.42  | 0     |
| S12-final-viral-combined_k141_198803 | [full] | 3019  | No  | NA    | 0  | 3  | Not-determined | Genome-fragment | NA | 0     | 0     |
| S12-final-viral-combined_k141_81657  | [full] | 3224  | No  | NA    | 0  | 0  | Not-determined | Genome-fragment | NA | 0     | 0     |
| S12-final-viral-combined_k141_81677  | [full] | 2059  | No  | NA    | 0  | 2  | Not-determined | Genome-fragment | NA | 0     | 0     |
| S12-final-viral-combined_k141_332684 | [full] | 2909  | No  | NA    | 0  | 1  | Not-determined | Genome-fragment | NA | 0     | 0     |
| S12-final-viral-combined_k141_295088 | [full] | 1732  | No  | NA    | 0  | 0  | Not-determined | Genome-fragment | NA | 0     | 0     |
| S11-final-viral-combined_k141_123925 | [full] | 3651  | No  | NA    | 0  |    |                |                 |    |       |       |



|                                      |           |       |     |       |    |    |                |                 |    |       |
|--------------------------------------|-----------|-------|-----|-------|----|----|----------------|-----------------|----|-------|
| S12-final-viral-combined_k141_349413 | [full]    | 5480  | No  | NA    | 0  | 2  | Not-determined | Genome-fragment | NA | 0     |
| S12-final-viral-combined_k141_299297 | [full]    | 1149  | No  | NA    | 0  | 0  | Not-determined | Genome-fragment | NA | 0     |
| S12-final-viral-combined_k141_81957  | [full]    | 9870  | No  | NA    | 0  | 4  | Not-determined | Genome-fragment | NA | 0     |
| S12-final-viral-combined_k141_64291  | [full]    | 4071  | No  | NA    | 0  | 1  | Not-determined | Genome-fragment | NA | 0     |
| S17-final-viral-combined_k141_18271  | [112gene] | 3056  | No  | NA    | 1  | 0  | Low-quality    | Genome-fragment | NA | 8.21  |
| S2-final-viral-combined_k141_16219   | [full]    | 3056  | No  | NA    | 0  | 1  | Low-quality    | Genome-fragment | NA | 1.53  |
| S11_k141_45569                       |           | 3058  | No  | NA    | 0  | 0  | Low-quality    | Genome-fragment | NA | 5.48  |
| S17-final-viral-combined_k141_37291  | [full]    | 3058  | Yes | NA    | 1  | 2  | Low-quality    | Genome-fragment | NA | 0.54  |
| S17-final-viral-combined_k141_140490 | [full]    | 3058  | No  | 997   | 0  | 1  | Low-quality    | Genome-fragment | NA | 2.77  |
| S7-final-viral-combined_k141_93841   | [full]    | 3059  | No  | NA    | 0  | 0  | Low-quality    | Genome-fragment | NA | 5.31  |
| S12-final-viral-combined_k141_30862  | [full]    | 1295  | No  | NA    | 0  | 2  | Not-determined | Genome-fragment | NA | 0     |
| S2_k141_240154                       |           | 3059  | No  | NA    | 0  | 2  | Low-quality    | Genome-fragment | NA | 0.49  |
| S12-final-viral-combined_k141_332983 | [full]    | 7009  | No  | NA    | 0  | 3  | Not-determined | Genome-fragment | NA | 0     |
| S12-final-viral-combined_k141_332987 | [full]    | 2634  | No  | NA    | 0  | 3  | Not-determined | Genome-fragment | NA | 0     |
| S12-final-viral-combined_k141_232940 | [full]    | 2450  | No  | NA    | 0  | 2  | Not-determined | Genome-fragment | NA | 0     |
| S12-final-viral-combined_k141_265034 | [full]    | 4969  | No  | NA    | 0  | 3  | Not-determined | Genome-fragment | NA | 0     |
| S12-final-viral-combined_k141_182235 | [full]    | 1687  | No  | NA    | 0  | 0  | Not-determined | Genome-fragment | NA | 0     |
| S12_k141_253268                      |           | 3060  | No  | NA    | 2  | 0  | Low-quality    | Genome-fragment | NA | 7.67  |
| S12-final-viral-combined_k141_130990 | [full]    | 1360  | No  | NA    | 0  | 0  | Not-determined | Genome-fragment | NA | 0     |
| S6-final-viral-combined_k141_24766   | [full]    | 3060  | No  | NA    | 0  | 1  | Low-quality    | Genome-fragment | NA | 3.71  |
| S12-final-viral-combined_k141_248714 | [full]    | 6055  | No  | NA    | 0  | 2  | Not-determined | Genome-fragment | NA | 0     |
| S2_k141_3558                         |           | 3061  | No  | NA    | 5  | 0  | Low-quality    | Genome-fragment | NA | 6.42  |
| S4_k141_74160                        |           | 3061  | No  | NA    | 0  | 0  | Low-quality    | Genome-fragment | NA | 12.29 |
| S4_k141_144845                       |           | 3061  | No  | NA    | 0  | 2  | Low-quality    | Genome-fragment | NA | 7.28  |
| S8-final-viral-combined_k141_78173   | [full]    | 3061  | No  | NA    | 2  | 0  | Low-quality    | Genome-fragment | NA | 4.47  |
| S11-final-viral-combined_k141_165584 | [full]    | 3062  | No  | NA    | 6  | 0  | Low-quality    | Genome-fragment | NA | 6.54  |
| S12-final-viral-combined_k141_233003 | [full]    | 1519  | No  | NA    | 0  | 2  | Not-determined | Genome-fragment | NA | 0     |
| S12-final-viral-combined_k141_215733 | [full]    | 1033  | No  | NA    | 0  | 1  | Not-determined | Genome-fragment | NA | 0     |
| S1-final-viral-combined_k141_109260  | [full]    | 3062  | No  | NA    | 0  | 2  | Low-quality    | Genome-fragment | NA | 4.72  |
| S17-k141_108097                      |           | 3062  | No  | NA    | 0  | 0  | Low-quality    | Genome-fragment | NA | 3.49  |
| S2-final-viral-combined_k141_151597  | [full]    | 3062  | No  | NA    | 0  | 0  | Low-quality    | Genome-fragment | NA | 2.55  |
| S12-final-viral-combined_k141_64419  | [full]    | 1010  | No  | NA    | 0  | 0  | Not-determined | Genome-fragment | NA | 4.11  |
| S8_k141_69768                        |           | 3062  | No  | NA    | 1  | 0  | Low-quality    | Genome-fragment | NA | 0     |
| S12-final-viral-combined_k141_165500 | [full]    | 1114  | No  | NA    | 0  | 1  | Not-determined | Genome-fragment | NA | 0     |
| S12-final-viral-combined_k141_233025 | [full]    | 4987  | No  | NA    | 0  | 1  | Not-determined | Genome-fragment | NA | 0     |
| S12-final-viral-combined_k141_281580 | [full]    | 2552  | No  | NA    | 0  | 4  | Not-determined | Genome-fragment | NA | 0     |
| S12-final-viral-combined_k141_182297 | [full]    | 1802  | No  | NA    | 0  | 2  | Not-determined | Genome-fragment | NA | 0     |
| S12-final-viral-combined_k141_131083 | [full]    | 2396  | No  | NA    | 0  | 1  | Not-determined | Genome-fragment | NA | 0     |
| S12-final-viral-combined_k141_349544 | [full]    | 2503  | No  | NA    | 0  | 1  | Not-determined | Genome-fragment | NA | 0     |
| S5_k141_18535                        |           | 3063  | No  | NA    | 2  | 0  | Low-quality    | Genome-fragment | NA | 8.02  |
| S12-final-viral-combined_k141_165522 | [full]    | 2914  | No  | NA    | 0  | 2  | Not-determined | Genome-fragment | NA | 0     |
| S12-final-viral-combined_k141_282858 | [full]    | 1690  | No  | NA    | 0  | 1  | Not-determined | Genome-fragment | NA | 0     |
| S12-final-viral-combined_k141_215786 | [full]    | 1832  | No  | NA    | 0  | 1  | Not-determined | Genome-fragment | NA | 0     |
| S1-final-viral-combined_k141_187472  | [full]    | 3064  | No  | NA    | 1  | 0  | Low-quality    | Genome-fragment | NA | 3.61  |
| S4-final-viral-combined_k141_83396   | [full]    | 3064  | No  | NA    | 0  | 0  | Low-quality    | Genome-fragment | NA | 4.74  |
| S12-final-viral-combined_k141_317200 | [full]    | 1954  | No  | NA    | 0  | 1  | Not-determined | Genome-fragment | NA | 0     |
| S12-final-viral-combined_k141_98046  | [full]    | 89205 | No  | 39193 | 21 | 24 | Medium-quality | Genome-fragment | NA | 61.36 |
| S11-final-viral-combined_k141_291053 | [full]    | 3066  | No  | NA    | 0  | 1  | Low-quality    | Genome-fragment | NA | 9.18  |
| S4-final-viral-combined_k141_66663   | [full]    | 3066  | No  | NA    | 0  | 0  | Low-quality    | Genome-fragment | NA | 1.93  |
| S12-final-viral-combined_k141_148021 | [full]    | 1776  | No  | NA    | 0  | 0  | Not-determined | Genome-fragment | NA | 0     |
| S5_k141_185889                       |           | 3067  | No  | NA    | 7  | 0  | Low-quality    | Genome-fragment | NA | 7.54  |
| S17-final-viral-combined_k141_59428  | [full]    | 3067  | No  | NA    | 0  | 1  | Low-quality    | Genome-fragment | NA | 5.23  |
| S12-final-viral-combined_k141_165617 | [full]    | 2211  | No  | NA    | 0  | 3  | Not-determined | Genome-fragment | NA | 0     |
| S17-final-viral-combined_k141_127863 | [full]    | 3067  | No  | NA    | 0  | 2  | Low-quality    | Genome-fragment | NA | 2.44  |
| S12_k141_270280                      |           | 3067  | No  | NA    | 0  | 4  | Low-quality    | Genome-fragment | NA | 6.56  |
| S2_k141_207923                       |           | 3067  | No  | NA    | 0  | 2  | Low-quality    | Genome-fragment | NA | 5     |
| S12-final-viral-combined_k141_64596  | [full]    | 3725  | No  | NA    | 0  | 2  | Not-determined | Genome-fragment | NA | 0     |
| S12-final-viral-combined_k141_131226 | [full]    | 4448  | No  | NA    | 0  | 1  | Not-determined | Genome-fragment | NA | 0     |
| S12-final-viral-combined_k141_382953 | [full]    | 3041  | No  | NA    | 0  | 2  | Not-determined | Genome-fragment | NA | 0     |
| S12-final-viral-combined_k141_215927 | [full]    | 2690  | No  | NA    | 0  | 0  | Not-determined | Genome-fragment | NA | 0     |
| S4-final-viral-combined_k141_47790   | [full]    | 3067  | No  | NA    | 0  | 0  | Low-quality    | Genome-fragment | NA | 2.18  |
| S12-final-viral-combined_k141_299467 | [full]    | 2211  | No  | NA    | 0  | 2  | Not-determined | Genome-fragment | NA | 0     |
| S12-final-viral-combined_k141_114579 | [full]    | 1817  | No  | NA    | 0  | 1  | Not-determined | Genome-fragment | NA | 0     |
| S12-final-viral-combined_k141_182456 | [full]    | 4870  | No  | NA    | 0  | 3  | Not-determined | Genome-fragment | NA | 0     |
| S12-final-viral-combined_k141_148141 | [full]    | 1747  | No  | NA    | 0  | 1  | Not-determined | Genome-fragment | NA | 0     |
| S12-final-viral-combined_k141_399191 | [full]    | 1021  | No  | NA    | 0  | 0  | Not-determined | Genome-fragment | NA | 0     |
| S4_k141_63903                        |           | 3067  | No  | NA    | 0  | 0  | Low-quality    | Genome-fragment | NA | 3.19  |
| S4_k141_28135                        |           | 3067  | No  | NA    | 0  | 1  | Low-quality    | Genome-fragment | NA | 10.69 |
| S12-final-viral-combined_k141_299519 | [full]    | 2114  | No  | NA    | 0  | 1  | Not-determined | Genome-fragment | NA | 0     |
| S1-final-viral-combined_k141_244081  | [full]    | 3068  | No  | NA    | 1  | 1  | Low-quality    | Genome-fragment | NA | 2.78  |
| S4-final-viral-combined_k141_136853  | [full]    | 3068  | Yes | 1680  | 1  | 1  | Low-quality    | Genome-fragment | NA | 0.71  |
| S1-final-viral-combined_k141_286050  | [full]    | 3069  | No  | NA    | 0  | 0  | Low-quality    | Genome-fragment | NA | 0.19  |
| S12-final-viral-combined_k141_399208 | [full]    | 3078  | No  | NA    | 0  | 3  | Not-determined | Genome-fragment | NA | 0     |
| S12-final-viral-combined_k141_165717 | [full]    | 1223  | No  | NA    | 0  | 1  | Not-determined | Genome-fragment | NA | 0     |
| S1-final-viral-combined_k141_387262  | [full]    | 3069  | No  | NA    | 0  | 1  | Low-quality    | Genome-fragment | NA | 2.52  |
| S12-final-viral-combined_k141_199260 | [full]    | 2516  | No  | NA    | 0  | 1  | Not-determined | Genome-fragment | NA | 0     |
| S1_k141_364714                       |           | 3069  | No  | NA    | 1  | 0  | Low-quality    | Genome-fragment | NA | 2.19  |
| S12-final-viral-combined_k141_282709 | [full]    | 2469  | No  | NA    | 0  | 2  | Not-determined | Genome-fragment | NA | 0     |
| S12-final-viral-combined_k141_282716 | [full]    | 1160  | No  | NA    | 1  | 1  | Not-determined | Genome-fragment | NA | 0     |
| S12-final-viral-combined_k141_981189 | [full]    | 8462  | No  | NA    | 0  | 7  | Not-determined | Genome-fragment | NA | 0     |
| S12-final-viral-combined_k141_216026 | [full]    | 1506  | No  | NA    | 0  | 1  | Not-determined | Genome-fragment | NA | 0     |
| S12-final-viral-combined_k141_312141 | [full]    | 8199  | No  | NA    | 0  | 7  | Not-determined | Genome-fragment | NA | 0     |
| S12-final-viral-combined_k141_165742 | [full]    | 2084  | No  | NA    | 0  | 0  | Not-determined | Genome-fragment | NA | 0     |
| S12-final-viral-combined_k141_399299 | [full]    | 1232  | No  | NA    | 0  | 0  | Not-determined | Genome-fragment | NA | 0     |
| S1_k141_197079                       |           | 3069  | No  | NA    | 0  | 1  | Low-quality    | Genome-fragment | NA | 3.23  |
| S12_k141_318757                      |           | 3069  | No  | NA    | 0  | 1  | Low-quality    | Genome-fragment | NA | 5.69  |
| S12-final-viral-combined_k141_312701 | [full]    | 1163  | No  | NA    | 0  | 0  | Not-determined | Genome-fragment | NA | 0     |
| S2-final-viral-combined_k141_155952  | [full]    | 3069  | No  | NA    | 3  | 1  | Low-quality    | Genome-fragment | NA | 6.5   |
| S12-final-viral-combined_k141_131446 | [full]    | 1504  | No  | NA    | 0  | 1  | Not-determined | Genome-fragment | NA | 0     |
| S8-final-viral-combined_k141_107078  | [full]    | 3069  | No  | NA    | 0  | 0  | Low-quality    | Genome-fragment | NA | 5.85  |
| S12-final-viral-combined_k141_216123 | [full]    | 1128  | No  | NA    | 0  | 0  | Not-determined | Genome-fragment | NA | 0     |
| S8-final-viral-combined_k141_249755  | [full]    | 3069  | No  | NA    | 2  | 0  | Low-quality    | Genome-fragment | NA | 7.09  |
| S9_k141_25580                        |           | 3070  | No  | NA    | 0  | 1  | Low-quality    | Genome-fragment | NA | 3.62  |
| S7_k141_189327                       |           | 3070  | No  | NA    | 1  | 0  | Low-quality    | Genome-fragment | NA | 6.88  |
| S12-final-viral-combined_k141_299628 | [full]    | 1226  | No  | NA    | 1  | 1  | Not-determined | Genome-fragment | NA | 0     |
| S12-final-viral-combined_k141_216165 | [full]    | 2100  | No  | NA    | 0  | 0  | Not-determined | Genome-fragment | NA | 0     |
| S12-final-viral-combined_k141_75495  | [full]    | 3070  | No  | NA    | 0  | 1  | Low-quality    | Genome-fragment | NA | 4.99  |
| S12-final-viral-combined_k141_349875 | [full]    | 2098  | No  | NA    | 0  | 2  | Not-determined | Genome-fragment | NA | 0     |
| S12-final-viral-combined_k141_491671 | [full]    | 2705  | No  | NA    | 0  | 1  | Not-determined | Genome-fragment | NA | 0     |
| S12-final-viral-combined_k141_98378  | [full]    | 4022  | No  | NA    | 0  | 2  | Not-determined | Genome-fragment | NA | 0     |
| S12-final-viral-combined_k141_148383 | [full]    | 1279  | No  | NA    | 0  | 0  | Not-determined | Genome-fragment | NA | 0     |
| S12-final-viral-combined_k141_349928 | [full]    | 1116  | No  | NA    | 0  | 0  | Not-determined | Genome-fragment | NA | 0     |
| S12-final-viral-combined_k141_49219  | [full]    | 3252  | No  | NA    | 0  | 0  | Not-determined | Genome-fragment | NA | 0     |
| S12-final-viral-combined_k141_399487 | [full]    | 1570  | No  | NA    | 0  | 1  | Not-determined | Genome-fragment | NA | 0     |
| S12-final-viral-combined_k141_233150 | [full]    | 1231  | No  | NA    | 0  | 1  | Not-determined | Genome-fragment | NA | 0     |
| S11-final-viral-combined_k141_163945 | [full]    | 3071  | No  | NA    | 0  | 2  | Low-quality    | Genome-fragment | NA | 1.68  |
| S12-final-viral-combined_k141_82530  | [full]    | 1954  | No  | NA    | 0  | 0  | Not-determined | Genome-fragment | NA | 0     |
| S11_k141_119113                      |           | 3072  | No  | NA    | 1  | 0  | Low-quality    | Genome-fragment | NA | 2.31  |
| S7-final-viral-combined_k141_31890   | [full]    | 3072  | No  | NA    | 0  | 1  | Low-quality    | Genome-fragment | NA | 8.05  |
| S12-final-viral-combined_k141_182671 | [full]    | 1414  | No  | NA    | 0  | 0  | Not-determined | Genome-fragment | NA | 0     |
| S12-final-viral-combined_k141_199460 | [full]    | 1325  | No  | NA    | 0  | 1  | Not-determined | Genome-fragment | NA | 0     |
| S12-final-viral-combined_k141_249198 | [full]    | 1210  | No  | NA    | 0  | 1  | Not-determined | Genome-fragment | NA | 0     |
| S12-final-viral-combined_k141_199476 | [full]    | 1235  | No  | NA    | 0  | 1  | Not-determined | Genome-fragment | NA | 0     |
| S7-final-viral-combined_k141_176199  | [full]    | 3072  | No  | NA    | 0  | 1  | Low-quality    | Genome-fragment | NA | 3.63  |
| S12-final-viral-combined_k141_147191 | [full]    | 2278  | No  | NA    | 0  | 1  | Low-quality    | Genome-fragment | NA | 0     |
| S12-final-viral-combined_k141_148470 | [full]    | 1121  | No  | NA    | 0  | 1  | Not-determined | Genome-fragment | NA | 0     |
| S12-final-viral-combined_k141_199485 | [full]    | 5462  | No  | NA    | 0  | 2  | Not-determined | Genome-fragment | NA | 0     |
| S12-final-viral-combined_k141_165925 | [full]    | 1883  | No  | NA    | 0  | 0  | Not-determined | Genome-fragment | NA | 2.04  |
| S6-final-viral-combined_k141_106361  | [full]    | 3072  | No  | NA    | 0  | 1  | Low-quality    | Genome-fragment | NA | 5.47  |
| S1_k141_85840                        |           | 3073  | No  | NA    | 0  | 2  | Low-quality    | Genome-fragment | NA | 9.24  |
| S1-final-viral-combined_k141_38244   | [full]    | 3074  | No  | NA    | 1  | 0  | Low-quality    | Genome-fragment | NA | 8.33  |
| S12-final-viral-combined_k141_165948 | [full]    | 1723  | No  | NA    | 0  | 3  | Not-determined | Genome-fragment | NA | 0     |
| S1_k141_8417                         |           | 3074  | No  | NA    | 2  | 0  | Low-quality    | Genome-fragment | NA | 2.27  |
| S1_k141_128192                       |           | 3074  | No  | NA    | 3  | 0  | Low-quality    | Genome-fragment | NA | 8.0   |
| S11_k141_303559                      |           | 3075  | No  | NA    | 3  | 0  | Low-quality    | Genome-fragment | NA | 7.17  |
| S17-final-viral-combined_k141_140628 | [full]    | 3075  | No  | NA    | 1  | 0  | Low-quality    | Genome-fragment | NA | 7     |
| S12-final-viral-combined_k141_182784 | [full]    | 2635  | No  | NA    | 0  | 1  | Not-determined | Genome-fragment | NA | 0     |
| S12-final-viral-combined_k141_49343  | [full]    | 1776  | No  | NA    | 0  | 0  | Not-determined | Genome-fragment | NA | 0     |
| S12-final-viral-combined_k141_165975 | [full]    | 3435  | No  | NA    | 0  | 2  | Not-determined | Genome-fragment | NA | 0     |
| S12-final-viral-combined_k141_364955 | [full]    | 1386  | No  | NA    | 0  | 2  | Not-determined | Genome-fragment | NA | 0     |
| S12-final-viral-combined_k1          |           |       |     |       |    |    |                |                 |    |       |



|                                       |          |       |     |    |       |    |                |                 |                 |       |
|---------------------------------------|----------|-------|-----|----|-------|----|----------------|-----------------|-----------------|-------|
| S12-final-viral-combined_k141_285390  | [full]   | 3081  | No  | NA | 0     | 3  | Low-quality    | Genome-fragment | 2.56            | 0     |
| S12-final-viral-combined_k141_49395   | [full]   | 5585  | No  | NA | 1     | 0  | Not-determined | Genome-fragment | NA              | 0     |
| S12-final-viral-combined_k141_14856   | [full]   | 15255 | No  | NA | 0     | 6  | Not-determined | Genome-fragment | NA              | 0     |
| S12-final-viral-combined_k141_82869   | [full]   | 1087  | No  | NA | 0     | 1  | Not-determined | Genome-fragment | NA              | 0     |
| S12-final-viral-combined_k141_148741  | [full]   | 41121 | Yes | NA | 37297 | 7  | 4              | High-quality    | High-quality    | 94.73 |
| S7_k141_95658                         | [full]   | 3081  | No  | NA | 0     | 1  | Low-quality    | Genome-fragment | NA              | 0     |
| S17-k141_193606                       | [full]   | 3081  | No  | NA | 0     | 3  | Low-quality    | Genome-fragment | 1.15            | 0     |
| S12-final-viral-combined_k141_98767   | [full]   | 4582  | No  | NA | 0     | 4  | Not-determined | Genome-fragment | NA              | 0     |
| S12_k141_233335                       | [full]   | 3081  | No  | NA | 0     | 0  | Low-quality    | Genome-fragment | 6.23            | 0     |
| S12-final-viral-combined_k141_233937  | [full]   | 1532  | No  | NA | 2     | 0  | 1              | Not-determined  | Genome-fragment | NA    |
| S12-final-viral-combined_k141_333793  | [full]   | 2373  | No  | NA | 0     | 0  | Not-determined | Genome-fragment | NA              | 0     |
| S12-final-viral-combined_k141_333803  | [full]   | 2192  | No  | NA | 0     | 2  | Not-determined | Genome-fragment | NA              | 0     |
| S4_k141_128264                        | [full]   | 3081  | No  | NA | 0     | 0  | Low-quality    | Genome-fragment | 1.98            | 0     |
| S17-final-viral-combined_k141_61361   | [full]   | 3082  | No  | NA | 0     | 1  | Low-quality    | Genome-fragment | 5.73            | 0     |
| S12-final-viral-combined_k141_31761   | [full]   | 40932 | Yes | NA | 36180 | 14 | 7              | High-quality    | High-quality    | 100   |
| S12-final-viral-combined_k141_350262  | [full]   | 7579  | No  | NA | 0     | 2  | Not-determined | Genome-fragment | NA              | 0     |
| S12-final-viral-combined_k141_249514  | [full]   | 1235  | No  | NA | 0     | 2  | Not-determined | Genome-fragment | NA              | 0     |
| S12_k141_232654                       | [full]   | 3082  | No  | NA | 0     | 2  | Low-quality    | Genome-fragment | 0.95            | 0     |
| S12-final-viral-combined_k141_249516  | [full]   | 4518  | No  | NA | 0     | 2  | Not-determined | Genome-fragment | NA              | 0     |
| S12-final-viral-combined_k141_82942   | [full]   | 1483  | No  | NA | 0     | 3  | Not-determined | Genome-fragment | NA              | 0     |
| S5-final-viral-combined_k141_167643   | [full]   | 3083  | No  | NA | 1     | 0  | Low-quality    | Genome-fragment | 0.49            | 0     |
| S12-final-viral-combined_k141_350257  | [full]   | 1723  | No  | NA | 0     | 1  | Not-determined | Genome-fragment | NA              | 0     |
| S17-final-viral-combined_k141_53460   | [full]   | 3083  | No  | NA | 0     | 2  | Low-quality    | Genome-fragment | 3.7             | 0     |
| S12-final-viral-combined_k141_169931  | [full]   | 3083  | No  | NA | 2     | 1  | Low-quality    | Genome-fragment | 6.12            | 0     |
| S8-final-viral-combined_k141_125445   | [full]   | 3083  | No  | NA | 1     | 0  | Low-quality    | Genome-fragment | 7.56            | 0     |
| S12-final-viral-combined_k141_148782  | [full]   | 1144  | No  | NA | 0     | 1  | Not-determined | Genome-fragment | NA              | 0     |
| S5-final-viral-combined_k141_188693   | [full]   | 3084  | No  | NA | 1     | 0  | Low-quality    | Genome-fragment | 2.32            | 0     |
| S5-final-viral-combined_k141_134047   | [full]   | 3085  | No  | NA | 0     | 2  | Low-quality    | Genome-fragment | 3.65            | 0     |
| S17-k141_43791                        | [full]   | 3085  | No  | NA | 1     | 0  | Low-quality    | Genome-fragment | 3.75            | 0     |
| S12-final-viral-combined_k141_383463  | [full]   | 1609  | No  | NA | 0     | 0  | Not-determined | Genome-fragment | NA              | 0     |
| S12-final-viral-combined_k141_199948  | [full]   | 2967  | No  | NA | 0     | 0  | Not-determined | Genome-fragment | NA              | 0     |
| S12_k141_20452                        | [full]   | 3085  | Yes | NA | 586   | 1  | 2              | Low-quality     | Genome-fragment | 0.53  |
| S4-final-viral-combined_k141_136536   | [full]   | 3085  | No  | NA | 1     | 0  | Low-quality    | Genome-fragment | 7.3             | 0     |
| S12-final-viral-combined_k141_333867  | [full]   | 1075  | No  | NA | 0     | 1  | Not-determined | Genome-fragment | NA              | 0     |
| S12-final-viral-combined_k141_365317  | [full]   | 5229  | No  | NA | 0     | 4  | Not-determined | Genome-fragment | NA              | 0     |
| S12-final-viral-combined_k141_365323  | [full]   | 1433  | No  | NA | 0     | 2  | Not-determined | Genome-fragment | NA              | 0     |
| S12-final-viral-combined_k141_350343  | [full]   | 5760  | No  | NA | 0     | 2  | Not-determined | Genome-fragment | NA              | 0     |
| S12-final-viral-combined_k141_350316  | [full]   | 1056  | No  | NA | 0     | 0  | Not-determined | Genome-fragment | NA              | 0     |
| S1-final-viral-combined_k141_133914   | [full]   | 3086  | No  | NA | 0     | 1  | Low-quality    | Genome-fragment | 6.73            | 0     |
| S7-final-viral-combined_k141_170149   | [full]   | 3086  | No  | NA | 2     | 0  | Low-quality    | Genome-fragment | 3.75            | 0     |
| S12-final-viral-combined_k141_131947  | [full]   | 2777  | No  | NA | 0     | 2  | Not-determined | Genome-fragment | NA              | 0     |
| S7_k141_99046                         | [full]   | 3086  | No  | NA | 4     | 0  | Low-quality    | Genome-fragment | 7.6             | 0     |
| S9_k141_53282                         | [full]   | 3087  | No  | NA | 1     | 0  | Low-quality    | Genome-fragment | 4.93            | 0     |
| S6_k141_84172                         | [full]   | 3087  | No  | NA | 0     | 2  | Low-quality    | Genome-fragment | 2.13            | 0     |
| S8_k141_236488                        | [full]   | 3087  | No  | NA | 0     | 0  | Low-quality    | Genome-fragment | 2.47            | 0     |
| S12-final-viral-combined_k141_98904   | [full]   | 3346  | No  | NA | 0     | 2  | Not-determined | Genome-fragment | NA              | 0     |
| S12-final-viral-combined_k141_365380  | [full]   | 1793  | No  | NA | 0     | 1  | Not-determined | Genome-fragment | NA              | 0     |
| S12-final-viral-combined_k141_65468   | [full]   | 4532  | No  | NA | 0     | 0  | Not-determined | Genome-fragment | NA              | 0     |
| S12-final-viral-combined_k141_115143  | [full]   | 5246  | No  | NA | 0     | 5  | Not-determined | Genome-fragment | NA              | 0     |
| S1-final-viral-combined_k141_265559   | [H2gene] | 3088  | No  | NA | 2     | 0  | Low-quality    | Genome-fragment | 4.78            | 0     |
| S4_k141_107922                        | [full]   | 3088  | No  | NA | 0     | 1  | Low-quality    | Genome-fragment | 4.88            | 0     |
| S6-final-viral-combined_k141_23461    | [full]   | 3088  | No  | NA | 0     | 2  | Low-quality    | Genome-fragment | 6.86            | 0     |
| S12-final-viral-combined_k141_199962  | [full]   | 2241  | No  | NA | 0     | 3  | Not-determined | Genome-fragment | NA              | 0     |
| S12-final-viral-combined_k141_216850  | [full]   | 2943  | No  | NA | 0     | 2  | Not-determined | Genome-fragment | NA              | 0     |
| S8-final-viral-combined_k141_228489   | [full]   | 3088  | No  | NA | 0     | 0  | Low-quality    | Genome-fragment | 4.22            | 0     |
| S9-final-viral-combined_k141_11076    | [full]   | 3090  | No  | NA | 0     | 1  | Low-quality    | Genome-fragment | 0.43            | 0     |
| S12-final-viral-combined_k141_42770   | [full]   | 3090  | No  | NA | 0     | 3  | Low-quality    | Genome-fragment | 3.77            | 0     |
| S12-final-viral-combined_k141_199989  | [full]   | 2018  | No  | NA | 0     | 1  | Not-determined | Genome-fragment | NA              | 0     |
| S12-final-viral-combined_k141_234097  | [full]   | 1847  | No  | NA | 0     | 2  | Not-determined | Genome-fragment | NA              | 0     |
| S12_k141_174005                       | [full]   | 3090  | No  | NA | 0     | 1  | Low-quality    | Genome-fragment | 2.86            | 0     |
| S12-final-viral-combined_k141_199996  | [full]   | 1683  | No  | NA | 0     | 0  | Not-determined | Genome-fragment | NA              | 0     |
| S12-final-viral-combined_k141_166983  | [full]   | 1619  | No  | NA | 0     | 1  | Not-determined | Genome-fragment | NA              | 0     |
| S8-final-viral-combined_k141_197865   | [full]   | 3090  | No  | NA | 0     | 0  | Low-quality    | Genome-fragment | 2.53            | 0     |
| S12-final-viral-combined_k141_265696  | [full]   | 1945  | No  | NA | 0     | 1  | Not-determined | Genome-fragment | NA              | 0     |
| S12-final-viral-combined_k141_230751  | [full]   | 1428  | No  | NA | 0     | 0  | Not-determined | Genome-fragment | NA              | 0     |
| S12-final-viral-combined_k141_350458  | [full]   | 4035  | No  | NA | 0     | 1  | Not-determined | Genome-fragment | NA              | 0     |
| S8-final-viral-combined_k141_31023    | [full]   | 3090  | No  | NA | 0     | 0  | Low-quality    | Genome-fragment | 6.26            | 0     |
| S12-final-viral-combined_k141_83129   | [full]   | 2080  | No  | NA | 0     | 2  | Not-determined | Genome-fragment | NA              | 0     |
| S12-final-viral-combined_k141_115133  | [full]   | 1684  | No  | NA | 0     | 0  | Not-determined | Genome-fragment | NA              | 0     |
| S12-final-viral-combined_k141_317966  | [full]   | 4161  | No  | NA | 0     | 5  | Not-determined | Genome-fragment | NA              | 0     |
| S12-final-viral-combined_k141_1151236 | [full]   | 1286  | No  | NA | 0     | 1  | Not-determined | Genome-fragment | NA              | 0     |
| S9-final-viral-combined_k141_8243     | [full]   | 3091  | No  | NA | 0     | 3  | Low-quality    | Genome-fragment | 2.29            | 0     |
| S1-final-viral-combined_k141_345966   | [full]   | 3091  | No  | NA | 0     | 4  | Low-quality    | Genome-fragment | 2.51            | 0     |
| S7-final-viral-combined_k141_176840   | [full]   | 3091  | No  | NA | 0     | 2  | Low-quality    | Genome-fragment | 1.39            | 0     |
| S12-final-viral-combined_k141_383481  | [full]   | 1247  | No  | NA | 0     | 1  | Not-determined | Genome-fragment | NA              | 0     |
| S12-final-viral-combined_k141_15233   | [full]   | 3088  | No  | NA | 0     | 0  | Not-determined | Genome-fragment | NA              | 0     |
| S12-final-viral-combined_k141_98966   | [full]   | 1271  | No  | NA | 0     | 0  | Not-determined | Genome-fragment | NA              | 0     |
| S12-final-viral-combined_k141_83188   | [full]   | 1286  | No  | NA | 0     | 0  | Not-determined | Genome-fragment | NA              | 0     |
| S12-final-viral-combined_k141_166447  | [full]   | 1485  | No  | NA | 0     | 1  | Not-determined | Genome-fragment | NA              | 0     |
| S12-final-viral-combined_k141_234200  | [full]   | 2293  | No  | NA | 0     | 1  | Not-determined | Genome-fragment | NA              | 0     |
| S8-final-viral-combined_k141_266419   | [full]   | 3091  | No  | NA | 2     | 0  | Low-quality    | Genome-fragment | 8.59            | 0     |
| S1-final-viral-combined_k141_375923   | [full]   | 3092  | No  | NA | 1     | 0  | Low-quality    | Genome-fragment | 2.38            | 0     |
| S7_k141_93445                         | [full]   | 3092  | No  | NA | 0     | 1  | Low-quality    | Genome-fragment | 6.66            | 0     |
| S17-k141_71843                        | [full]   | 3092  | No  | NA | 1     | 0  | Low-quality    | Genome-fragment | 0.25            | 0     |
| S12-final-viral-combined_k141_166464  | [full]   | 1024  | No  | NA | 0     | 0  | Not-determined | Genome-fragment | NA              | 0     |
| S4_k141_109411                        | [full]   | 3092  | No  | NA | 0     | 0  | Low-quality    | Genome-fragment | 5.11            | 0     |
| S8_k141_93486                         | [full]   | 3092  | No  | NA | 1     | 0  | Low-quality    | Genome-fragment | 7.43            | 0     |
| S12-final-viral-combined_k141_228238  | [full]   | 3086  | No  | NA | 0     | 2  | Not-determined | Genome-fragment | NA              | 0     |
| S12-final-viral-combined_k141_399981  | [full]   | 2280  | No  | NA | 0     | 0  | Not-determined | Genome-fragment | NA              | 0     |
| S12-final-viral-combined_k141_166477  | [full]   | 1288  | No  | NA | 0     | 0  | Not-determined | Genome-fragment | NA              | 0     |
| S9-final-viral-combined_k141_59260    | [full]   | 3093  | No  | NA | 0     | 0  | Low-quality    | Genome-fragment | 6.58            | 0     |
| S11-final-viral-combined_k141_241531  | [full]   | 3093  | No  | NA | 0     | 0  | Low-quality    | Genome-fragment | 4.38            | 0     |
| S1-final-viral-combined_k141_160635   | [full]   | 3093  | No  | NA | 0     | 1  | Low-quality    | Genome-fragment | 5.51            | 0     |
| S12-final-viral-combined_k141_15357   | [full]   | 1110  | No  | NA | 0     | 0  | Not-determined | Genome-fragment | NA              | 0     |
| S5-final-viral-combined_k141_52561    | [full]   | 3093  | No  | NA | 0     | 1  | Low-quality    | Genome-fragment | 3.59            | 0     |
| S12-final-viral-combined_k141_300361  | [full]   | 1810  | No  | NA | 0     | 2  | Not-determined | Genome-fragment | NA              | 0     |
| S17-k141_91181                        | [full]   | 3093  | No  | NA | 0     | 2  | Low-quality    | Genome-fragment | 1.49            | 0     |
| S12-final-viral-combined_k141_132177  | [full]   | 1198  | No  | NA | 0     | 2  | Not-determined | Genome-fragment | NA              | 0     |
| S12-final-viral-combined_k141_136292  | [full]   | 3093  | No  | NA | 0     | 0  | Low-quality    | Genome-fragment | 7.21            | 0     |
| S4-final-viral-combined_k141_77551    | [full]   | 3093  | No  | NA | 0     | 1  | Low-quality    | Genome-fragment | 4.4             | 0     |
| S12-final-viral-combined_k141_83181   | [full]   | 1878  | No  | NA | 0     | 1  | Not-determined | Genome-fragment | NA              | 0     |
| S9-final-viral-combined_k141_167515   | [full]   | 3094  | No  | NA | 0     | 1  | Low-quality    | Genome-fragment | 2.88            | 0     |
| S7-final-viral-combined_k141_202007   | [full]   | 3094  | No  | NA | 0     | 0  | Low-quality    | Genome-fragment | 5.45            | 0     |
| S12-final-viral-combined_k141_238125  | [full]   | 1439  | No  | NA | 0     | 2  | Not-determined | Genome-fragment | NA              | 0     |
| S12-final-viral-combined_k141_249787  | [full]   | 16419 | No  | NA | 10    | 0  | Not-determined | Genome-fragment | NA              | 0     |
| S12-final-viral-combined_k141_350620  | [full]   | 2158  | No  | NA | 0     | 1  | Not-determined | Genome-fragment | NA              | 0     |
| S12-final-viral-combined_k141_234325  | [full]   | 1532  | No  | NA | 0     | 1  | Not-determined | Genome-fragment | NA              | 0     |
| S12-final-viral-combined_k141_65755   | [full]   | 3287  | No  | NA | 0     | 0  | Not-determined | Genome-fragment | NA              | 0     |
| S12-final-viral-combined_k141_181484  | [full]   | 3913  | No  | NA | 0     | 0  | Not-determined | Genome-fragment | NA              | 0     |
| S12-final-viral-combined_k141_103858  | [full]   | 3094  | No  | NA | 1     | 0  | Low-quality    | Genome-fragment | 2.37            | 0     |
| S12-final-viral-combined_k141_265966  | [full]   | 4476  | No  | NA | 0     | 1  | Not-determined | Genome-fragment | NA              | 0     |
| S12-final-viral-combined_k141_50100   | [full]   | 3695  | No  | NA | 0     | 3  | Not-determined | Genome-fragment | NA              | 0     |
| S12_k141_188934                       | [full]   | 3095  | No  | NA | 0     | 0  | Low-quality    | Genome-fragment | 3.11            | 0     |
| S12-final-viral-combined_k141_15480   | [full]   | 2338  | No  | NA | 0     | 3  | Not-determined | Genome-fragment | NA              | 0     |
| S1_k141_242140                        | [full]   | 3096  | No  | NA | 0     | 0  | Low-quality    | Genome-fragment | 6.83            | 0     |
| S1-final-viral-combined_k141_178551   | [full]   | 3097  | No  | NA | 3     | 0  | Low-quality    | Genome-fragment | 4.98            | 0     |
| S12-final-viral-combined_k141_200245  | [full]   | 2107  | No  | NA | 0     | 0  | Not-determined | Genome-fragment | NA              | 0     |
| S12-final-viral-combined_k141_99239   | [full]   | 1031  | No  | NA | 0     | 1  | Not-determined | Genome-fragment | NA              | 0     |
| S12_k141_200153                       | [full]   | 3097  | No  | NA | 0     | 2  | Low-quality    | Genome-fragment | 7.18            | 0     |
| S12-final-viral-combined_k141_266011  | [full]   | 3740  | No  | NA | 0     | 2  | Not-determined | Genome-fragment | NA              | 0     |
| S2-final-viral-combined_k141_238125   | [full]   | 3097  | No  | NA | 0     | 1  | Low-quality    | Genome-fragment | 1.4             | 0     |
| S12-final-viral-combined_k141_383821  | [full]   | 3046  | No  | NA | 0     | 1  | Not-determined | Genome-fragment | NA              | 0     |
| S7-final-viral-combined_k141_240486   | [full]   | 3098  | No  | NA | 0     | 2  | Low-quality    | Genome-fragment | 1.06            | 0     |
| S12-final-viral-combined_k141_217552  | [full]   | 2215  | No  | NA | 0     | 1  | Not-determined | Genome-fragment | NA              | 0     |
| S12-final-viral-combined_k141_334290  | [full]   | 1376  | No  | NA | 0     | 1  | Not-determined | Genome-fragment | NA              | 0     |
| S17-k141_167540                       | [full]   | 3098  | No  | NA | 1     | 0  | Low-quality    | Genome-fragment | 1.19            | 0     |
| S12-final-viral-combined_k141_50197   | [full]   | 1785  | No  | NA | 0     | 0  | Not-determined | Genome-fragment | NA              | 0     |
| S12-final-viral-combined_k141_350735  | [full]   | 2800  | No  | NA | 0     | 2  | Not-determined | Genome-fragment | NA              | 0     |
| S12_k141_20173                        | [full]   | 3098  | No  | NA | 2     | 0  | Low-quality    | Genome-fragment | 8.12            | 0     |
| S12-final-viral-combined_k141_183652  | [full]   | 2416  | No  | NA | 0     |    |                |                 |                 |       |



|                                      |         |       |     |      |   |   |                |                 |                 |       |       |
|--------------------------------------|---------|-------|-----|------|---|---|----------------|-----------------|-----------------|-------|-------|
| S12-final-viral-combined_k141_334532 | [full]  | 5146  | No  | NA   | 0 | 3 | Not-determined | Genome-fragment | NA              | 0     | 0     |
| S12-final-viral-combined_k141_321591 | [full]  | 2122  | No  | NA   | 0 | 1 | Not-determined | Genome-fragment | NA              | 0     | 0     |
| S1-final-viral-combined_k141_166385  | [full]  | 3106  | No  | NA   | 0 | 4 | Low-quality    | Genome-fragment | NA              | 4.52  | 0     |
| S12-final-viral-combined_k141_365771 | [full]  | 1093  | No  | NA   | 0 | 2 | Not-determined | Genome-fragment | NA              | 0     | 0     |
| S3-final-viral-combined_k141_83200   | [full]  | 3106  | No  | NA   | 0 | 0 | Low-quality    | Genome-fragment | NA              | 7.34  | 0     |
| S12-final-viral-combined_k141_250105 | [full]  | 2679  | No  | NA   | 0 | 3 | Not-determined | Genome-fragment | NA              | 0     | 0     |
| S3-final-viral-combined_k141_67163   | [full]  | 3106  | No  | NA   | 0 | 2 | Low-quality    | Genome-fragment | NA              | 3.27  | 0     |
| S12-final-viral-combined_k141_351016 | [full]  | 3426  | No  | NA   | 0 | 3 | Not-determined | Genome-fragment | NA              | 0     | 0     |
| S12-final-viral-combined_k141_167340 | [full]  | 1573  | No  | NA   | 0 | 2 | Not-determined | Genome-fragment | NA              | 0     | 0     |
| S12-final-viral-combined_k141_183088 | [full]  | 3106  | No  | NA   | 0 | 2 | Low-quality    | Genome-fragment | NA              | 1.58  | 0     |
| S12-final-viral-combined_k141_99626  | [full]  | 1523  | No  | NA   | 0 | 0 | Not-determined | Genome-fragment | NA              | 0     | 0     |
| S12_k141_218054                      |         | 3106  | No  | NA   | 0 | 0 | Low-quality    | Genome-fragment | NA              | 4.39  | 0     |
| S2_k141_197641                       |         | 3107  | No  | NA   | 0 | 2 | Low-quality    | Genome-fragment | NA              | 0.6   | 0     |
| S2_k141_7957                         |         | 3107  | No  | NA   | 0 | 1 | Low-quality    | Genome-fragment | NA              | 3.31  | 0     |
| S3-final-viral-combined_k141_136862  | [H2gme] | 3108  | No  | NA   | 0 | 0 | Low-quality    | Genome-fragment | NA              | 2.03  | 0     |
| S12_k141_61535                       |         | 3108  | No  | NA   | 0 | 0 | Low-quality    | Genome-fragment | NA              | 6.49  | 0     |
| S9-final-viral-combined_k141_99246   | [full]  | 3109  | No  | NA   | 0 | 0 | Low-quality    | Genome-fragment | NA              | 6.99  | 0     |
| S11-final-viral-combined_k141_115652 | [full]  | 3109  | Yes | 993  | 1 | 1 | Low-quality    | Genome-fragment | NA              | 0.46  | 68.06 |
| S12-final-viral-combined_k141_145047 | [full]  | 2208  | No  | NA   | 0 | 2 | Not-determined | Genome-fragment | NA              | 0     | 0     |
| S12-final-viral-combined_k141_32644  | [full]  | 13102 | No  | NA   | 0 | 7 | Not-determined | Genome-fragment | NA              | 0     | 0     |
| S12-final-viral-combined_k141_351122 | [full]  | 1803  | No  | NA   | 0 | 0 | Not-determined | Genome-fragment | NA              | 0     | 0     |
| S12-final-viral-combined_k141_298597 | [full]  | 2206  | No  | NA   | 0 | 2 | Not-determined | Genome-fragment | NA              | 0     | 0     |
| S12-final-viral-combined_k141_183957 | [full]  | 1639  | No  | NA   | 0 | 0 | Not-determined | Genome-fragment | NA              | 0     | 0     |
| S4-final-viral-combined_k141_92371   | [full]  | 3109  | No  | NA   | 0 | 3 | Low-quality    | Genome-fragment | NA              | 3.57  | 0     |
| S12-final-viral-combined_k141_400125 | [full]  | 4391  | No  | NA   | 0 | 2 | Not-determined | Genome-fragment | NA              | 0     | 0     |
| S12-final-viral-combined_k141_167146 | [full]  | 1759  | No  | NA   | 0 | 0 | Not-determined | Genome-fragment | NA              | 0     | 0     |
| S17-final-viral-combined_k141_226757 | [full]  | 3110  | No  | NA   | 1 | 0 | Low-quality    | Genome-fragment | NA              | 1.11  | 0     |
| S12-final-viral-combined_k141_217509 | [full]  | 6472  | No  | NA   | 0 | 6 | Not-determined | Genome-fragment | NA              | 0     | 0     |
| S12-final-viral-combined_k141_15871  | [full]  | 2450  | No  | NA   | 0 | 0 | Not-determined | Genome-fragment | NA              | 0     | 0     |
| S12-final-viral-combined_k141_132751 | [full]  | 4615  | No  | NA   | 0 | 3 | Not-determined | Genome-fragment | NA              | 0     | 0     |
| S12-final-viral-combined_k141_99704  | [full]  | 82142 | No  | 24   | 0 | 0 | Medium-quality | Genome-fragment | NA              | 67.85 | 0     |
| S9-final-viral-combined_k141_351120  | [full]  | 3111  | No  | NA   | 0 | 3 | Low-quality    | Genome-fragment | NA              | 2.23  | 0     |
| S12-final-viral-combined_k141_15865  | [full]  | 2056  | No  | NA   | 0 | 2 | Not-determined | Genome-fragment | NA              | 0     | 0     |
| S12-final-viral-combined_k141_32707  | [full]  | 1283  | No  | NA   | 0 | 1 | Not-determined | Genome-fragment | NA              | 0     | 0     |
| S1-final-viral-combined_k141_284487  | [full]  | 3111  | No  | NA   | 0 | 3 | Low-quality    | Genome-fragment | NA              | 3.57  | 0     |
| S12-final-viral-combined_k141_114027 | [full]  | 10048 | No  | NA   | 0 | 0 | Not-determined | Genome-fragment | NA              | 0     | 0     |
| S12-final-viral-combined_k141_66402  | [full]  | 5537  | No  | NA   | 0 | 0 | Not-determined | Genome-fragment | NA              | 0     | 0     |
| S12-final-viral-combined_k141_66403  | [full]  | 1251  | No  | NA   | 0 | 0 | Not-determined | Genome-fragment | NA              | 0     | 0     |
| S11-final-viral-combined_k141_287490 | [full]  | 3112  | No  | NA   | 0 | 0 | Low-quality    | Genome-fragment | NA              | 5.68  | 0     |
| S12-final-viral-combined_k141_334700 | [full]  | 1093  | No  | NA   | 1 | 0 | 1              | Not-determined  | Genome-fragment | NA    | 0     |
| S12-final-viral-combined_k141_116050 | [full]  | 2330  | No  | NA   | 0 | 2 | Not-determined | Genome-fragment | NA              | 0     | 0     |
| S17-final-viral-combined_k141_228071 | [full]  | 2112  | No  | NA   | 0 | 0 | Low-quality    | Genome-fragment | NA              | 5.87  | 0     |
| S12-final-viral-combined_k141_32764  | [full]  | 2432  | No  | NA   | 0 | 1 | Not-determined | Genome-fragment | NA              | 0     | 0     |
| S12-final-viral-combined_k141_384315 | [full]  | 3615  | No  | NA   | 0 | 2 | Not-determined | Genome-fragment | NA              | 0     | 0     |
| S12-final-viral-combined_k141_2282   | [full]  | 1252  | No  | NA   | 0 | 0 | Not-determined | Genome-fragment | NA              | 0     | 0     |
| S12-final-viral-combined_k141_366045 | [full]  | 3113  | No  | NA   | 4 | 0 | Not-determined | Genome-fragment | NA              | 6.84  | 0     |
| S11-final-viral-combined_k141_225908 | [full]  | 3113  | No  | NA   | 0 | 0 | Low-quality    | Genome-fragment | NA              | 1.06  | 0     |
| S11_k141_191820                      |         | 3113  | No  | NA   | 0 | 0 | Low-quality    | Genome-fragment | NA              | 3.59  | 0     |
| S8_k141_150166                       |         | 3113  | No  | NA   | 0 | 0 | Low-quality    | Genome-fragment | NA              | 0     | 0     |
| S12-final-viral-combined_k141_334734 | [full]  | 2236  | No  | NA   | 0 | 0 | Not-determined | Genome-fragment | NA              | 0     | 0     |
| S12-final-viral-combined_k141_149677 | [full]  | 1459  | No  | NA   | 0 | 2 | Not-determined | Genome-fragment | NA              | 0     | 0     |
| S9_k141_50689                        |         | 3114  | No  | NA   | 0 | 2 | Low-quality    | Genome-fragment | NA              | 3.88  | 0     |
| S7-final-viral-combined_k141_28640   | [full]  | 2114  | No  | NA   | 2 | 0 | Low-quality    | Genome-fragment | NA              | 6.67  | 0     |
| S17-k141_65196                       |         | 3114  | No  | NA   | 0 | 0 | Low-quality    | Genome-fragment | NA              | 3.56  | 0     |
| S1-final-viral-combined_k141_114773  | [full]  | 3115  | No  | NA   | 0 | 1 | Low-quality    | Genome-fragment | NA              | 2.24  | 0     |
| S12-final-viral-combined_k141_334757 | [full]  | 4789  | No  | NA   | 0 | 4 | Not-determined | Genome-fragment | NA              | 0     | 0     |
| S12-final-viral-combined_k141_99186  | [full]  | 2860  | No  | NA   | 0 | 2 | Not-determined | Genome-fragment | NA              | 0     | 0     |
| S12-final-viral-combined_k141_384391 | [full]  | 3240  | No  | NA   | 0 | 1 | Not-determined | Genome-fragment | NA              | 0     | 0     |
| S12-final-viral-combined_k141_149714 | [full]  | 2610  | No  | NA   | 0 | 1 | Not-determined | Genome-fragment | NA              | 0     | 0     |
| S12_k141_155308                      |         | 3115  | No  | NA   | 0 | 0 | Low-quality    | Genome-fragment | NA              | 3.14  | 0     |
| S12-final-viral-combined_k141_69715  | [full]  | 3115  | No  | NA   | 0 | 2 | Low-quality    | Genome-fragment | NA              | 2.38  | 0     |
| S8-final-viral-combined_k141_20674   | [full]  | 3115  | No  | NA   | 1 | 0 | Low-quality    | Genome-fragment | NA              | 5.38  | 0     |
| S8_k141_6282                         |         | 3115  | No  | NA   | 0 | 1 | Low-quality    | Genome-fragment | NA              | 1.68  | 0     |
| S1-final-viral-combined_k141_151131  | [full]  | 3116  | No  | NA   | 0 | 0 | Low-quality    | Genome-fragment | NA              | 2.4   | 0     |
| S7_k141_114524                       |         | 3116  | No  | NA   | 0 | 0 | Low-quality    | Genome-fragment | NA              | 5.22  | 0     |
| S6_k141_102908                       |         | 3116  | No  | NA   | 0 | 3 | Low-quality    | Genome-fragment | NA              | 2.25  | 0     |
| S9-final-viral-combined_k141_70947   | [full]  | 3117  | No  | NA   | 0 | 0 | Low-quality    | Genome-fragment | NA              | 3.89  | 0     |
| S12-final-viral-combined_k141_86007  | [full]  | 3117  | No  | NA   | 1 | 0 | Low-quality    | Genome-fragment | NA              | 2.31  | 0     |
| S12-final-viral-combined_k141_366171 | [full]  | 3561  | No  | NA   | 0 | 0 | Not-determined | Genome-fragment | NA              | 90.9  | 0     |
| S12-final-viral-combined_k141_132907 | [full]  | 4130  | No  | 30   | 0 | 0 | High-quality   | Genome-fragment | NA              | 0     | 0     |
| S12-final-viral-combined_k141_366173 | [full]  | 2954  | No  | NA   | 0 | 2 | Not-determined | Genome-fragment | NA              | 0     | 0     |
| S12-final-viral-combined_k141_351321 | [full]  | 1575  | No  | NA   | 0 | 0 | Not-determined | Genome-fragment | NA              | 0     | 0     |
| S7-final-viral-combined_k141_182591  | [full]  | 3118  | No  | NA   | 0 | 0 | Low-quality    | Genome-fragment | NA              | 5.56  | 0     |
| S17-final-viral-combined_k141_43557  | [full]  | 3118  | No  | NA   | 0 | 0 | Low-quality    | Genome-fragment | NA              | 5.66  | 0     |
| S12-final-viral-combined_k141_149756 | [full]  | 1429  | No  | NA   | 0 | 0 | Not-determined | Genome-fragment | NA              | 0     | 0     |
| S12-final-viral-combined_k141_370906 | [full]  | 3118  | No  | NA   | 0 | 0 | Low-quality    | Genome-fragment | NA              | 5.88  | 0     |
| S12-final-viral-combined_k141_66622  | [full]  | 2525  | No  | NA   | 0 | 0 | Not-determined | Genome-fragment | NA              | 0     | 0     |
| S12-final-viral-combined_k141_384460 | [full]  | 1027  | No  | NA   | 0 | 1 | Not-determined | Genome-fragment | NA              | 0     | 0     |
| S9_k141_118003                       |         | 3119  | No  | NA   | 1 | 0 | Low-quality    | Genome-fragment | NA              | 5.8   | 0     |
| S12-final-viral-combined_k141_132974 | [full]  | 2815  | No  | NA   | 0 | 2 | Not-determined | Genome-fragment | NA              | 0     | 0     |
| S1-final-viral-combined_k141_363234  | [full]  | 3119  | No  | NA   | 4 | 0 | Low-quality    | Genome-fragment | NA              | 5.53  | 0     |
| S12-final-viral-combined_k141_131633 | [full]  | 3119  | No  | NA   | 0 | 3 | Low-quality    | Genome-fragment | NA              | 0.92  | 0     |
| S9-final-viral-combined_k141_113310  | [full]  | 3120  | No  | NA   | 0 | 2 | Low-quality    | Genome-fragment | NA              | 0.92  | 0     |
| S12-final-viral-combined_k141_266567 | [full]  | 1403  | No  | NA   | 0 | 1 | Not-determined | Genome-fragment | NA              | 0     | 0     |
| S12-final-viral-combined_k141_384520 | [full]  | 4218  | No  | NA   | 0 | 3 | Not-determined | Genome-fragment | NA              | 6.68  | 0     |
| S11-final-viral-combined_k141_11761  | [full]  | 3120  | No  | NA   | 0 | 0 | Low-quality    | Genome-fragment | NA              | 7.14  | 0     |
| S1-final-viral-combined_k141_276808  | [full]  | 3120  | No  | NA   | 0 | 1 | Low-quality    | Genome-fragment | NA              | 3.32  | 0     |
| S5_k141_118665                       |         | 3120  | No  | NA   | 0 | 0 | Low-quality    | Genome-fragment | NA              | 3.7   | 0     |
| S12-final-viral-combined_k141_22050  | [full]  | 3120  | No  | NA   | 1 | 0 | Low-quality    | Genome-fragment | NA              | 5.34  | 0     |
| S2_k141_180204                       |         | 3120  | No  | NA   | 0 | 1 | Low-quality    | Genome-fragment | NA              | 97.46 | 0     |
| S12-final-viral-combined_k141_250551 | [full]  | 41741 | No  | NA   | 5 | 2 | High-quality   | Genome-fragment | NA              | 1.55  | 0     |
| S8_k141_255148                       |         | 3120  | No  | NA   | 0 | 2 | Low-quality    | Genome-fragment | NA              | 0     | 0     |
| S12-final-viral-combined_k141_66749  | [full]  | 1223  | No  | NA   | 0 | 0 | Not-determined | Genome-fragment | NA              | 1.69  | 0     |
| S1-final-viral-combined_k141_383983  | [full]  | 3121  | No  | NA   | 1 | 0 | Low-quality    | Genome-fragment | NA              | 0     | 0     |
| S12-final-viral-combined_k141_100046 | [full]  | 1215  | No  | NA   | 0 | 1 | Not-determined | Genome-fragment | NA              | 5.16  | 0     |
| S1_k141_330699                       |         | 3121  | No  | NA   | 0 | 0 | Low-quality    | Genome-fragment | NA              | 7.4   | 0     |
| S17-final-viral-combined_k141_155963 | [full]  | 3121  | No  | NA   | 2 | 0 | Low-quality    | Genome-fragment | NA              | 0     | 0     |
| S12-final-viral-combined_k141_351414 | [full]  | 2120  | No  | NA   | 0 | 0 | Not-determined | Genome-fragment | NA              | 0     | 0     |
| S12-final-viral-combined_k141_16344  | [full]  | 4442  | No  | NA   | 0 | 3 | Not-determined | Genome-fragment | NA              | 3.48  | 0     |
| S12-final-viral-combined_k141_314726 | [full]  | 3121  | No  | NA   | 0 | 0 | Low-quality    | Genome-fragment | NA              | 4.63  | 35.11 |
| S11-final-viral-combined_k141_102994 | [full]  | 3122  | Yes | 2026 | 1 | 1 | Low-quality    | Genome-fragment | NA              | 0     | 0     |
| S12-final-viral-combined_k141_66812  | [full]  | 1410  | No  | NA   | 0 | 1 | Not-determined | Genome-fragment | NA              | 2.19  | 0     |
| S12-final-viral-combined_k141_66811  | [full]  | 4856  | No  | NA   | 0 | 0 | Not-determined | Genome-fragment | NA              | 0     | 0     |
| S3-final-viral-combined_k141_131056  | [full]  | 3122  | No  | NA   | 0 | 0 | Low-quality    | Genome-fragment | NA              | 0     | 0     |
| S12-final-viral-combined_k141_133180 | [full]  | 1525  | No  | NA   | 0 | 1 | Not-determined | Genome-fragment | NA              | 5.24  | 0     |
| S12-final-viral-combined_k141_133187 | [full]  | 2439  | No  | NA   | 0 | 4 | Not-determined | Genome-fragment | NA              | 0     | 0     |
| S12-final-viral-combined_k141_266681 | [full]  | 1268  | No  | NA   | 0 | 0 | Not-determined | Genome-fragment | NA              | 0     | 0     |
| S12-final-viral-combined_k141_133215 | [full]  | 1861  | No  | NA   | 0 | 2 | Not-determined | Genome-fragment | NA              | 0     | 0     |
| S12-final-viral-combined_k141_400553 | [full]  | 1743  | No  | NA   | 0 | 0 | Not-determined | Genome-fragment | NA              | 0     | 0     |
| S12-final-viral-combined_k141_100130 | [full]  | 1013  | No  | NA   | 0 | 1 | Not-determined | Genome-fragment | NA              | 0     | 0     |
| S12-final-viral-combined_k141_250647 | [full]  | 1533  | No  | NA   | 0 | 0 | Not-determined | Genome-fragment | NA              | 0     | 0     |
| S5-final-viral-combined_k141_14477   | [full]  | 3122  | No  | NA   | 2 | 0 | Low-quality    | Genome-fragment | NA              | 5.24  | 0     |
| S9-final-viral-combined_k141_25180   | [full]  | 3123  | No  | NA   | 0 | 0 | Low-quality    | Genome-fragment | NA              | 5.34  | 0     |
| S17-final-viral-combined_k141_89747  | [full]  | 3123  | No  | NA   | 7 | 0 | Low-quality    | Genome-fragment | NA              | 9.14  | 0     |
| S4_k141_1121261                      |         | 3123  | No  | NA   | 0 | 0 | Low-quality    | Genome-fragment | NA              | 5.22  | 0     |
| S8-final-viral-combined_k141_144362  | [full]  | 3123  | No  | NA   | 0 | 2 | Low-quality    | Genome-fragment | NA              | 2.31  | 0     |
| S12-final-viral-combined_k141_100195 | [full]  | 3291  | No  | NA   | 0 | 1 | Not-determined | Genome-fragment | NA              | 0     | 0     |
| S12-final-viral-combined_k141_301284 | [full]  | 3010  | No  | NA   | 0 | 0 | Not-determined | Genome-fragment | NA              | 0     | 0     |
| S12-final-viral-combined_k141_400590 | [full]  | 2681  | No  | NA   | 0 | 3 | Not-determined | Genome-fragment | NA              | 0     | 0     |
| S12-final-viral-combined_k141_331291 | [full]  | 1211  | No  | NA   | 0 | 0 | Not-determined | Genome-fragment | NA              | 0     | 0     |
| S12-final-viral-combined_k141_301290 | [full]  | 3028  | No  | NA   | 0 | 0 | Not-determined | Genome-fragment | NA              | 0     | 0     |
| S17-final-viral-combined_k141_80637  | [full]  | 3124  | Yes | 998  | 1 | 2 | Low-quality    | Genome-fragment | NA</            |       |       |



|                                        |             |       |     |    |       |    |                |                 |                 |                 |       |   |
|----------------------------------------|-------------|-------|-----|----|-------|----|----------------|-----------------|-----------------|-----------------|-------|---|
| S12-final-viral-combined_k141_117056[] | [full]      | 5039  | No  | NA | 0     | 2  | Not-determined | Genome-fragment | NA              | 4.34            | 0     |   |
| S11-final-viral-combined_k141_30459[]  | [full]      | 3133  | No  | NA | 3     | 0  | Low-quality    | Genome-fragment | NA              | 2.33            | 0     |   |
| S7-final-viral-combined_k141_33352[]   | [full]      | 3133  | No  | NA | 0     | 0  | Low-quality    | Genome-fragment | NA              | 2.33            | 0     |   |
| S12-final-viral-combined_k141_117113[] | [full]      | 1136  | No  | NA | 0     | 1  | Not-determined | Genome-fragment | NA              | 0               | 0     |   |
| S12-final-viral-combined_k141_267423[] | [full]      | 1717  | No  | NA | 0     | 0  | Not-determined | Genome-fragment | NA              | 0               | 0     |   |
| S17-final-viral-combined_k141_192416[] | [full]      | 3133  | No  | NA | 0     | 0  | Low-quality    | Genome-fragment | NA              | 3.86            | 0     |   |
| S12-final-viral-combined_k141_133759[] | [full]      | 2689  | No  | NA | 0     | 3  | Not-determined | Genome-fragment | NA              | 7.45            | 0     |   |
| S12_k141_182334                        |             | 3133  | No  | NA | 0     | 2  | Low-quality    | Genome-fragment | NA              | 3.26            | 0     |   |
| S2_k141_237139                         |             | 3133  | No  | NA | 2     | 0  | Low-quality    | Genome-fragment | NA              | 7.45            | 0     |   |
| S12-final-viral-combined_k141_133789[] | [full]      | 1051  | No  | NA | 0     | 2  | Not-determined | Genome-fragment | NA              | 0               | 0     |   |
| S12-final-viral-combined_k141_401196[] | [full]      | 5239  | No  | NA | 0     | 1  | Not-determined | Genome-fragment | NA              | 6.34            | 24.96 |   |
| S2_k141_245586                         |             | 3133  | Yes | NA | 2     | 1  | Low-quality    | Genome-fragment | NA              | 6.34            | 0     |   |
| S12-final-viral-combined_k141_401222[] | [full]      | 1395  | No  | NA | 0     | 0  | Not-determined | Genome-fragment | NA              | 5.55            | 0     |   |
| S7-final-viral-combined_k141_42140[]   | [full]      | 3134  | No  | NA | 0     | 0  | Low-quality    | Genome-fragment | NA              | 8.05            | 0     |   |
| S12-final-viral-combined_k141_267278[] | [full]      | 6251  | No  | NA | 0     | 2  | Not-determined | Genome-fragment | NA              | 8.43            | 0     |   |
| S12-final-viral-combined_k141_267531[] | [full]      | 1459  | No  | NA | 2     | 1  | Not-determined | Genome-fragment | NA              | 3.69            | 0     |   |
| S7-final-viral-combined_k141_201858[]  | [full]      | 3134  | No  | NA | 3     | 0  | Low-quality    | Genome-fragment | NA              | 2.43            | 0     |   |
| S17-final-viral-combined_k141_201536[] | [full]      | 3134  | No  | NA | 2     | 0  | Low-quality    | Genome-fragment | NA              | 3.05            | 0     |   |
| S12-final-viral-combined_k141_401346[] | [full]      | 3482  | No  | NA | 0     | 1  | Not-determined | Genome-fragment | NA              | 2.52            | 0     |   |
| S12-final-viral-combined_k141_401348[] | [full]      | 2958  | No  | NA | 0     | 0  | Not-determined | Genome-fragment | NA              | 4.75            | 0     |   |
| S17-final-viral-combined_k141_192348[] | [full]      | 3134  | No  | NA | 2     | 0  | Low-quality    | Genome-fragment | NA              | 2.52            | 0     |   |
| S12-final-viral-combined_k141_367581[] | [full]      | 1103  | No  | NA | 0     | 0  | Not-determined | Genome-fragment | NA              | 2.43            | 0     |   |
| S12-final-viral-combined_k141_367590[] | [full]      | 1727  | No  | NA | 0     | 0  | Not-determined | Genome-fragment | NA              | 51.73           | 0     |   |
| S6-final-viral-combined_k141_25729[]   | [full]      | 3134  | No  | NA | 0     | 2  | Low-quality    | Genome-fragment | NA              | 0               | 0     |   |
| S12-final-viral-combined_k141_367632[] | [full]      | 1294  | No  | NA | 0     | 0  | Not-determined | Genome-fragment | NA              | 3.05            | 0     |   |
| S8-final-viral-combined_k141_52743[]   | [H2gene]    | 3134  | No  | NA | 1     | 0  | Low-quality    | Genome-fragment | NA              | 0               | 0     |   |
| S12-final-viral-combined_k141_367827[] | [full]      | 5837  | No  | NA | 0     | 4  | Not-determined | Genome-fragment | NA              | 0               | 0     |   |
| S12-final-viral-combined_k141_267809[] | [full]      | 1652  | No  | NA | 0     | 1  | Not-determined | Genome-fragment | NA              | 100             | 53.73 |   |
| S12-final-viral-combined_k141_368100[] | [full]      | 11274 | Yes | NA | 52158 | 26 | Complete       | High-quality    | Genome-fragment | NA              | 0     |   |
| S12-final-viral-combined_k141_368216[] | [full]      | 1502  | No  | NA | 0     | 0  | Not-determined | Genome-fragment | NA              | 6.73            | 0     |   |
| S1_k141_172255                         |             | 3135  | No  | NA | 1     | 0  | Low-quality    | Genome-fragment | NA              | 0               | 0     |   |
| S12-final-viral-combined_k141_234454[] | [O_partial] | 25759 | No  | NA | 0     | 0  | Not-determined | Genome-fragment | NA              | 0               | 0     |   |
| S12-final-viral-combined_k141_334917[] | [O_partial] | 16813 | No  | NA | 0     | 4  | Not-determined | Genome-fragment | NA              | 2.52            | 0     |   |
| S12_k141_53474                         |             | 3135  | No  | NA | 1     | 0  | Low-quality    | Genome-fragment | NA              | 51              | 0     |   |
| S12-final-viral-combined_k141_137447[] | [O_partial] | 4229  | No  | NA | 1     | 0  | Medium-quality | Genome-fragment | NA              | 1.65            | 0     |   |
| S2-final-viral-combined_k141_77766[]   | [full]      | 3135  | No  | NA | 0     | 1  | Low-quality    | Genome-fragment | NA              | 4.25            | 26.49 |   |
| S5-final-viral-combined_k141_173433[]  | [full]      | 3136  | No  | NA | 1     | 0  | Low-quality    | Genome-fragment | NA              | 19.95           | 23.42 |   |
| S1-final-viral-combined_k141_148693[]  | [full]      | 3117  | Yes | NA | 2306  | 1  | Low-quality    | Genome-fragment | NA              | 0               | 0     |   |
| S12-final-viral-combined_k141_168798[] | [O_partial] | 4000  | Yes | NA | 30653 | 8  | High-quality   | High-quality    | Genome-fragment | NA              | 0     |   |
| S12-final-viral-combined_k141_84788[]  | [O_partial] | 22085 | No  | NA | 0     | 6  | Not-determined | Genome-fragment | NA              | 2.52            | 0     |   |
| S5-final-viral-combined_k141_188342[]  | [full]      | 3137  | No  | NA | 0     | 0  | Low-quality    | Genome-fragment | NA              | 4.75            | 0     |   |
| S1_k141_528                            |             | 3138  | No  | NA | 1     | 0  | Low-quality    | Genome-fragment | NA              | 0               | 0     |   |
| S12-final-viral-combined_k141_185931[] | [O_partial] | 3114  | No  | NA | 0     | 5  | Not-determined | Genome-fragment | NA              | 3.52            | 0     |   |
| S5-final-viral-combined_k141_124006[]  | [full]      | 3138  | No  | NA | 3     | 0  | Low-quality    | Genome-fragment | NA              | 5.51            | 0     |   |
| S7-final-viral-combined_k141_222241[]  | [full]      | 3138  | No  | NA | 0     | 0  | Low-quality    | Genome-fragment | NA              | 7.28            | 0     |   |
| S12-final-viral-combined_k141_360181[] | [O_partial] | 17461 | No  | NA | 0     | 10 | Not-determined | Genome-fragment | NA              | 4.92            | 49.06 |   |
| S7-final-viral-combined_k141_173507[]  | [full]      | 3138  | No  | NA | 0     | 3  | Low-quality    | Genome-fragment | NA              | 100             | 36.73 |   |
| S5_k141_156594                         |             | 3139  | Yes | NA | 1599  | 1  | 2              | Low-quality     | Genome-fragment | NA              | 0     |   |
| S12-final-viral-combined_k141_220029[] | [O_partial] | 10676 | No  | NA | 0     | 7  | Not-determined | Genome-fragment | NA              | 0               | 0     |   |
| S12-final-viral-combined_k141_270839[] | [O_partial] | 54725 | Yes | NA | 34624 | 6  | 17             | Complete        | High-quality    | Genome-fragment | NA    |   |
| S12-final-viral-combined_k141_120125[] | [O_partial] | 12078 | No  | NA | 0     | 11 | Not-determined | Genome-fragment | NA              | 1.6             | 0     |   |
| S12-final-viral-combined_k141_37166[]  | [O_partial] | 10772 | No  | NA | 0     | 6  | Not-determined | Genome-fragment | NA              | 0               | 0     |   |
| S2-final-viral-combined_k141_175574[]  | [full]      | 3139  | No  | NA | 0     | 3  | Low-quality    | Genome-fragment | NA              | 0               | 0     |   |
| S12-final-viral-combined_k141_138432[] | [O_partial] | 11277 | No  | NA | 0     | 4  | Not-determined | Genome-fragment | NA              | 7.78            | 0     |   |
| S11-final-viral-combined_k141_239134[] | [full]      | 3140  | No  | NA | 0     | 0  | Low-quality    | Genome-fragment | NA              | 6.18            | 0     |   |
| S17-final-viral-combined_k141_157987[] | [full]      | 3140  | No  | NA | 0     | 0  | Low-quality    | Genome-fragment | NA              | 0               | 0     |   |
| S12-final-viral-combined_k141_4752[]   | [O_partial] | 13259 | No  | NA | 0     | 7  | Not-determined | Genome-fragment | NA              | 69.41           | 0     |   |
| S12-final-viral-combined_k141_373648[] | [O_partial] | 21152 | No  | NA | 0     | 0  | Not-determined | Genome-fragment | NA              | 0               | 0     |   |
| S12-final-viral-combined_k141_323658[] | [O_partial] | 11952 | No  | NA | 0     | 10 | Not-determined | Genome-fragment | NA              | 19.34           | 0     |   |
| S12-final-viral-combined_k141_223051[] | [O_partial] | 14781 | No  | NA | 0     | 4  | Not-determined | Genome-fragment | NA              | 39.31           | 0     |   |
| S17-final-viral-combined_k141_19075[]  | [full]      | 3140  | No  | NA | 1     | 0  | Low-quality    | Genome-fragment | NA              | 1.66            | 0     |   |
| S12-final-viral-combined_k141_157167[] | [O_partial] | 3883  | No  | NA | 1     | 0  | High-quality   | High-quality    | Genome-fragment | NA              | 0     |   |
| S7_k141_238291                         |             | 3141  | No  | NA | 0     | 0  | Low-quality    | Genome-fragment | NA              | 6.94            | 0     |   |
| S9-final-viral-combined_k141_31567[]   | [full]      | 3142  | No  | NA | 2     | 0  | Low-quality    | Genome-fragment | NA              | 2.16            | 0     |   |
| S1-final-viral-combined_k141_430001[]  | [full]      | 3142  | Yes | NA | 282   | 0  | Low-quality    | Genome-fragment | NA              | 0.54            | 91.02 |   |
| S8-final-viral-combined_k141_85754[]   | [full]      | 3142  | Yes | NA | 1     | 3  | Low-quality    | Genome-fragment | NA              | 5.05            | 0     |   |
| S17-final-viral-combined_k141_231246[] | [full]      | 3143  | No  | NA | 0     | 2  | Low-quality    | Genome-fragment | NA              | 1.34            | 0     |   |
| S12-final-viral-combined_k141_141157[] | [O_partial] | 12794 | No  | NA | 0     | 2  | Not-determined | Genome-fragment | NA              | 6.53            | 0     |   |
| S12_k141_302331                        |             | 3143  | No  | NA | 1     | 0  | Low-quality    | Genome-fragment | NA              | 4.26            | 0     |   |
| S17-final-viral-combined_k141_29659[]  | [full]      | 3144  | No  | NA | 4     | 0  | Low-quality    | Genome-fragment | NA              | 2.09            | 0     |   |
| S8-final-viral-combined_k141_267897[]  | [full]      | 3144  | No  | NA | 0     | 1  | Low-quality    | Genome-fragment | NA              | 1.99            | 0     |   |
| S11-final-viral-combined_k141_178128[] | [full]      | 3145  | No  | NA | 0     | 1  | Low-quality    | Genome-fragment | NA              | 3.07            | 35.55 |   |
| S1-final-viral-combined_k141_152109[]  | [full]      | 3145  | No  | NA | 1     | 1  | Low-quality    | Genome-fragment | NA              | 0               | 0     |   |
| S7_k141_30503                          |             | 3145  | Yes | NA | 2027  | 1  | 1              | Low-quality     | Genome-fragment | NA              | 4.35  | 0 |
| S12-final-viral-combined_k141_312983[] | [O_partial] | 11027 | No  | NA | 0     | 2  | Low-quality    | Genome-fragment | NA              | 4.55            | 0     |   |
| S8-final-viral-combined_k141_168056[]  | [full]      | 3145  | No  | NA | 0     | 0  | Low-quality    | Genome-fragment | NA              | 2.4             | 0     |   |
| S1-final-viral-combined_k141_168679[]  | [full]      | 3146  | No  | NA | 2     | 0  | Low-quality    | Genome-fragment | NA              | 0               | 0     |   |
| S12-final-viral-combined_k141_162415[] | [O_partial] | 10884 | No  | NA | 0     | 11 | Not-determined | Genome-fragment | NA              | 0               | 0     |   |
| S1-final-viral-combined_k141_172615[]  | [full]      | 3146  | No  | NA | 0     | 1  | Low-quality    | Genome-fragment | NA              | 7.06            | 0     |   |
| S12-final-viral-combined_k141_112207[] | [O_partial] | 15004 | No  | NA | 0     | 10 | Not-determined | Genome-fragment | NA              | 4.95            | 0     |   |
| S12-final-viral-combined_k141_112382[] | [O_partial] | 13708 | No  | NA | 0     | 3  | Not-determined | Genome-fragment | NA              | 6.59            | 0     |   |
| S8-final-viral-combined_k141_187169[]  | [full]      | 3146  | No  | NA | 0     | 0  | Low-quality    | Genome-fragment | NA              | 69.41           | 0     |   |
| S2-final-viral-combined_k141_232128[]  | [full]      | 3147  | No  | NA | 2     | 0  | Low-quality    | Genome-fragment | NA              | 1.42            | 0     |   |
| S8-final-viral-combined_k141_88440[]   | [full]      | 3147  | No  | NA | 1     | 0  | Low-quality    | Genome-fragment | NA              | 3.69            | 0     |   |
| S12-final-viral-combined_k141_164656[] | [O_partial] | 24258 | No  | NA | 0     | 0  | Medium-quality | Genome-fragment | NA              | 9.49            | 0     |   |
| S7_k141_2875                           |             | 3148  | No  | NA | 0     | 2  | Low-quality    | Genome-fragment | NA              | 62.56           | 0     |   |
| S4_k141_63394                          |             | 3148  | No  | NA | 0     | 1  | Low-quality    | Genome-fragment | NA              | 0.38            | 0     |   |
| S9_k141_4527                           |             | 3149  | No  | NA | 3     | 0  | Low-quality    | Genome-fragment | NA              | 5.65            | 0     |   |
| S12-final-viral-combined_k141_133608[] | [O_partial] | 3151  | No  | NA | 1     | 0  | Medium-quality | Genome-fragment | NA              | 6.78            | 0     |   |
| S7_k141_54313                          |             | 3149  | No  | NA | 0     | 1  | Low-quality    | Genome-fragment | NA              | 3.37            | 0     |   |
| S12-final-viral-combined_k141_145601[] | [full]      | 3150  | No  | NA | 5     | 0  | Low-quality    | Genome-fragment | NA              | 1.79            | 0     |   |
| S12_k141_168303                        |             | 3151  | No  | NA | 1     | 1  | Low-quality    | Genome-fragment | NA              | 0.84            | 0     |   |
| S1-final-viral-combined_k141_214507[]  | [full]      | 3152  | No  | NA | 1     | 0  | Low-quality    | Genome-fragment | NA              | 0.93            | 0     |   |
| S7-final-viral-combined_k141_85940[]   | [full]      | 3152  | No  | NA | 1     | 0  | Low-quality    | Genome-fragment | NA              | 0.98            | 0     |   |
| S12-final-viral-combined_k141_251364[] | [H2gene]    | 1595  | No  | NA | 0     | 2  | Low-quality    | Genome-fragment | NA              | 1.98            | 20.91 |   |
| S17-k141_78509                         |             | 3152  | No  | NA | 0     | 2  | Low-quality    | Genome-fragment | NA              | 7.74            | 0     |   |
| S12-final-viral-combined_k141_84075[]  | [H2gene]    | 1408  | No  | NA | 0     | 1  | Not-determined | Genome-fragment | NA              | 8.87            | 39.8  |   |
| S4-final-viral-combined_k141_156689[]  | [full]      | 3152  | No  | NA | 0     | 1  | Low-quality    | Genome-fragment | NA              | 2.01            | 0     |   |
| S4_k141_42049                          |             | 3152  | No  | NA | 0     | 1  | Low-quality    | Genome-fragment | NA              | 6.65            | 0     |   |
| S12-final-viral-combined_k141_100851[] | [H2gene]    | 1069  | No  | NA | 0     | 0  | Not-determined | Genome-fragment | NA              | 0               | 0     |   |
| S8_k141_115790                         |             | 3152  | Yes | NA | 2493  | 1  | 1              | Low-quality     | Genome-fragment | NA              | 0     | 0 |
| S8_k141_131722                         |             | 3152  | No  | NA | 0     | 0  | Low-quality    | Genome-fragment | NA              | 7.84            | 0     |   |
| S11_k141_172206                        |             | 3153  | No  | NA | 0     | 1  | Low-quality    | Genome-fragment | NA              | 2.01            | 0     |   |
| S12-final-viral-combined_k141_335335[] | [H2gene]    | 1585  | No  | NA | 0     | 0  | Not-determined | Genome-fragment | NA              | 6.65            | 0     |   |
| S12-final-viral-combined_k141_354704[] | [full]      | 3153  | Yes | NA | 1898  | 2  | Low-quality    | Genome-fragment | NA              | 0               | 0     |   |
| S8-final-viral-combined_k141_12787[]   | [full]      | 3153  | No  | NA | 4     | 0  | Low-quality    | Genome-fragment | NA              | 0               | 0     |   |
| S11-final-viral-combined_k141_322835[] | [full]      | 3154  | No  | NA | 1     | 0  | Low-quality    | Genome-fragment | NA              | 0               | 0     |   |
| S17-final-viral-combined_k141_180774[] | [full]      | 3154  | No  | NA | 2     | 0  | Low-quality    | Genome-fragment | NA              | 0               | 0     |   |
| S12-final-viral-combined_k141_135067[] | [H2gene]    | 1171  | No  | NA | 0     | 0  | Not-determined | Genome-fragment | NA              | 0               | 0     |   |
| S12-final-viral-combined_k141_1508[]   | [H2gene]    | 1413  | No  | NA | 0     | 0  | Not-determined | Genome-fragment | NA              | 0               | 0     |   |
| S12-final-viral-combined_k141_369780[] | [H2gene]    | 1163  | No  | NA | 0     | 1  | Not-determined | Genome-fragment | NA              | 6.77            | 0     |   |
| S12-final-viral-combined_k141_359594[] | [full]      | 3154  | No  | NA | 0     | 1  | Low-quality    | Genome-fragment | NA              | 4.09            | 0     |   |
| S12_k141_115148                        |             | 3155  | No  | NA | 0     | 0  | Low-quality    | Genome-fragment | NA              | 1.42            | 0     |   |
| S6-final-viral-combined_k141_170501[]  | [full]      | 3155  | No  | NA | 0     | 1  | Low-quality    | Genome-fragment | NA              | 0               | 0     |   |
| S12-final-viral-combined_k141_152472[] | [H2gene]    | 3502  | No  | NA | 0     | 0  | Not-determined | Genome-fragment | NA              | 12.48           | 0     |   |
| S12-final-viral-combined_k141_319986[] | [H2gene]    | 1373  | No  | NA | 0     | 0  | Not-determined | Genome-fragment | NA              | 7.51            | 0     |   |
| S2-final-viral-combined_k141_102643[]  | [full]      | 3156  | No  | NA | 2     | 0  | Low-quality    | Genome-fragment | NA              | 5.3             | 0     |   |
| S11-final-viral-combined_k141_185441[] | [full]      | 3157  | No  | NA | 0     | 1  | Low-quality    | Genome-fragment | NA              | 6.71            | 0     |   |
| S17-final-viral-combined_k141_145473[] | [full]      | 3157  | No  | NA | 0     | 1  | Low-quality    | Genome-fragment | NA              | 7.79            | 0     |   |
| S8_k141_23184                          |             |       |     |    |       |    |                |                 |                 |                 |       |   |



|                                      |          |      |     |    |      |   |                |                 |                 |       |       |
|--------------------------------------|----------|------|-----|----|------|---|----------------|-----------------|-----------------|-------|-------|
| S11-final-viral-combined_k141_96396  | [full]   | 3170 | No  | NA | 0    | 3 | Low-quality    | Genome-fragment | 1.53            | 0     |       |
| S5-final-viral-combined_k141_115529  | [full]   | 3170 | No  | NA | 4    | 0 | Low-quality    | Genome-fragment | 8.75            | 0     |       |
| S12_k141_78288                       |          | 3170 | No  | NA | 0    | 0 | Low-quality    | Genome-fragment | 1.18            | 0     |       |
| S6-final-viral-combined_k141_111148  | [full]   | 3170 | No  | NA | 0    | 1 | Low-quality    | Genome-fragment | 5.81            | 0     |       |
| S17-final-viral-combined_k141_131850 | [full]   | 3171 | No  | NA | 0    | 2 | Low-quality    | Genome-fragment | 4.31            | 0     |       |
| S12-final-viral-combined_k141_189754 | [full]   | 3171 | No  | NA | 0    | 1 | Low-quality    | Genome-fragment | 3.38            | 0     |       |
| S2_k141_240285                       |          | 3171 | No  | NA | 0    | 3 | Low-quality    | Genome-fragment | 1.16            | 0     |       |
| S8_k141_207785                       |          | 3171 | No  | NA | 0    | 0 | Low-quality    | Genome-fragment | 8.15            | 0     |       |
| S12-final-viral-combined_k141_380265 | [full]   | 3172 | No  | NA | 1    | 0 | Low-quality    | Genome-fragment | 7.66            | 0     |       |
| S1-final-viral-combined_k141_21366   | [full]   | 3173 | No  | NA | 1    | 0 | Low-quality    | Genome-fragment | 4.8             | 0     |       |
| S12-final-viral-combined_k141_156934 | [H2gene] | 2066 | No  | NA | 0    | 0 | Not-determined | Genome-fragment | NA              | 0     |       |
| S2-final-viral-combined_k141_48831   | [full]   | 3173 | No  | NA | 0    | 1 | Low-quality    | Genome-fragment | 6.88            | 0     |       |
| S12-final-viral-combined_k141_73914  | [H2gene] | 1701 | No  | NA | 2    | 0 | Not-determined | Genome-fragment | NA              | 0     |       |
| S12-final-viral-combined_k141_40056  | [H2gene] | 1554 | No  | NA | 0    | 1 | Not-determined | Genome-fragment | NA              | 0     |       |
| S12-final-viral-combined_k141_106501 | [H2gene] | 1976 | No  | NA | 0    | 1 | Not-determined | Genome-fragment | NA              | 0     |       |
| S12-final-viral-combined_k141_274143 | [H2gene] | 1412 | No  | NA | 0    | 0 | Not-determined | Genome-fragment | NA              | 0     |       |
| S5-final-viral-combined_k141_156067  | [full]   | 3174 | No  | NA | 0    | 0 | Low-quality    | Genome-fragment | 8.36            | 0     |       |
| S12-final-viral-combined_k141_3963   | [full]   | 3174 | No  | NA | 1    | 0 | Low-quality    | Genome-fragment | 8.14            | 0     |       |
| S4_k141_161877                       |          | 3174 | No  | NA | 1    | 0 | Low-quality    | Genome-fragment | 5.12            | 0     |       |
| S2_k141_202482                       |          | 3175 | No  | NA | 0    | 1 | Low-quality    | Genome-fragment | 1.32            | 0     |       |
| S11_k141_258242                      |          | 3176 | No  | NA | 0    | 0 | Low-quality    | Genome-fragment | 6.23            | 0     |       |
| S12-final-viral-combined_k141_140494 | [H2gene] | 3189 | No  | NA | 0    | 0 | Not-determined | Genome-fragment | NA              | 0     |       |
| S1-final-viral-combined_k141_112091  | [full]   | 3176 | No  | NA | 0    | 1 | Low-quality    | Genome-fragment | 5.84            | 0     |       |
| S12-final-viral-combined_k141_207614 | [H2gene] | 1470 | No  | NA | 0    | 0 | Not-determined | Genome-fragment | NA              | 0     |       |
| S1_k141_82765                        |          | 3176 | No  | NA | 0    | 2 | Low-quality    | Genome-fragment | 1.75            | 0     |       |
| S12-final-viral-combined_k141_6656   | [H2gene] | 1025 | No  | NA | 0    | 0 | Not-determined | Genome-fragment | NA              | 0     |       |
| S5-final-viral-combined_k141_82625   | [full]   | 3176 | No  | NA | 0    | 2 | Low-quality    | Genome-fragment | 1.29            | 0     |       |
| S5_k141_31160                        |          | 3176 | Yes | NA | 1343 | 1 | 1              | Low-quality     | Genome-fragment | 0.62  | 57.71 |
| S12_k141_31194                       |          | 3176 | No  | NA | 0    | 1 | Low-quality    | Genome-fragment | 6.07            | 0     |       |
| S17-k141_26252                       |          | 3177 | No  | NA | 3    | 0 | Low-quality    | Genome-fragment | 7.53            | 0     |       |
| S2-final-viral-combined_k141_16835   | [full]   | 3177 | No  | NA | 0    | 1 | Low-quality    | Genome-fragment | 3.38            | 0     |       |
| S8-final-viral-combined_k141_83167   | [full]   | 3177 | No  | NA | 1    | 1 | Low-quality    | Genome-fragment | 2.42            | 0     |       |
| S9-final-viral-combined_k141_59156   | [full]   | 3179 | No  | NA | 0    | 2 | Low-quality    | Genome-fragment | 6.37            | 0     |       |
| S12-final-viral-combined_k141_375598 | [H2gene] | 1571 | No  | NA | 0    | 1 | Not-determined | Genome-fragment | NA              | 0     |       |
| S9-final-viral-combined_k141_82889   | [full]   | 3179 | No  | NA | 0    | 1 | Low-quality    | Genome-fragment | 4.23            | 0     |       |
| S1-final-viral-combined_k141_246671  | [full]   | 3179 | No  | NA | 0    | 0 | Low-quality    | Genome-fragment | 3.1             | 0     |       |
| S1_k141_320103                       |          | 3179 | No  | NA | 0    | 0 | Low-quality    | Genome-fragment | 5.24            | 0     |       |
| S3-final-viral-combined_k141_15745   | [full]   | 3179 | No  | NA | 4    | 0 | Low-quality    | Genome-fragment | 5.26            | 0     |       |
| S12-final-viral-combined_k141_325578 | [H2gene] | 1484 | No  | NA | 0    | 0 | Not-determined | Genome-fragment | NA              | 0     |       |
| S12-final-viral-combined_k141_258218 | [H2gene] | 1950 | No  | NA | 0    | 0 | Not-determined | Genome-fragment | NA              | 0     |       |
| S17-final-viral-combined_k141_86531  | [full]   | 3179 | No  | NA | 1    | 0 | Low-quality    | Genome-fragment | 2.18            | 0     |       |
| S12-final-viral-combined_k141_24697  | [H2gene] | 2096 | No  | NA | 1    | 0 | Not-determined | Genome-fragment | NA              | 0     |       |
| S7-final-viral-combined_k141_28998   | [full]   | 3180 | No  | NA | 0    | 0 | Low-quality    | Genome-fragment | 3.24            | 0     |       |
| S8_k141_109932                       |          | 3180 | No  | NA | 2    | 0 | Low-quality    | Genome-fragment | 7.81            | 0     |       |
| S8-final-viral-combined_k141_242302  | [full]   | 3181 | No  | NA | 0    | 0 | Low-quality    | Genome-fragment | 7.36            | 0     |       |
| S3-final-viral-combined_k141_21786   | [full]   | 3182 | No  | NA | 4    | 0 | Low-quality    | Genome-fragment | 9.12            | 0     |       |
| S7-final-viral-combined_k141_90881   | [full]   | 3182 | No  | NA | 0    | 3 | Low-quality    | Genome-fragment | 4.18            | 0     |       |
| S12-final-viral-combined_k141_41484  | [H2gene] | 1315 | No  | NA | 0    | 1 | Not-determined | Genome-fragment | NA              | 0     |       |
| S12-final-viral-combined_k141_255397 | [full]   | 3182 | No  | NA | 0    | 1 | Low-quality    | Genome-fragment | 7.09            | 0     |       |
| S12-final-viral-combined_k141_358423 | [H2gene] | 1419 | No  | NA | 0    | 0 | Not-determined | Genome-fragment | NA              | 0     |       |
| S1-final-viral-combined_k141_181420  | [full]   | 3183 | Yes | NA | 2302 | 1 | 1              | Low-quality     | Genome-fragment | 1.42  | 27.68 |
| S12-final-viral-combined_k141_208775 | [H2gene] | 2296 | No  | NA | 0    | 1 | Not-determined | Genome-fragment | NA              | 0     |       |
| S1_k141_343190                       |          | 3183 | No  | NA | 0    | 4 | Low-quality    | Genome-fragment | 0.82            | 0     |       |
| S2-final-viral-combined_k141_238696  | [full]   | 3183 | No  | NA | 0    | 0 | Low-quality    | Genome-fragment | 5.28            | 0     |       |
| S1-final-viral-combined_k141_226848  | [full]   | 3185 | No  | NA | 0    | 0 | Low-quality    | Genome-fragment | 4.94            | 0     |       |
| S12-final-viral-combined_k141_342365 | [H2gene] | 1644 | No  | NA | 0    | 0 | Not-determined | Genome-fragment | NA              | 0     |       |
| S12-final-viral-combined_k141_108522 | [H2gene] | 1079 | No  | NA | 0    | 0 | Not-determined | Genome-fragment | NA              | 0     |       |
| S1_k141_370285                       |          | 3185 | No  | NA | 5    | 0 | Low-quality    | Genome-fragment | 8.04            | 0     |       |
| S7_k141_158482                       |          | 3185 | No  | NA | 0    | 0 | Low-quality    | Genome-fragment | 5.06            | 0     |       |
| S12-final-viral-combined_k141_74476  | [full]   | 3185 | No  | NA | 0    | 1 | Low-quality    | Genome-fragment | 6.3             | 0     |       |
| S12-final-viral-combined_k141_276791 | [H2gene] | 1104 | No  | NA | 0    | 0 | Not-determined | Genome-fragment | NA              | 0     |       |
| S12-final-viral-combined_k141_43023  | [H2gene] | 1295 | No  | NA | 0    | 0 | Not-determined | Genome-fragment | NA              | 0     |       |
| S6-final-viral-combined_k141_24254   | [full]   | 3185 | No  | NA | 0    | 0 | Low-quality    | Genome-fragment | 8.36            | 0     |       |
| S12-final-viral-combined_k141_25744  | [H2gene] | 1543 | No  | NA | 0    | 2 | Not-determined | Genome-fragment | NA              | 0     |       |
| S12_k141_203713                      |          | 3186 | Yes | NA | 549  | 0 | Low-quality    | Genome-fragment | 0.68            | 82.77 |       |
| S12-final-viral-combined_k141_311331 | [H2gene] | 1274 | No  | NA | 0    | 0 | Not-determined | Genome-fragment | NA              | 0     |       |
| S12_k141_120373                      |          | 3186 | No  | NA | 0    | 2 | Low-quality    | Genome-fragment | 2.16            | 0     |       |
| S8_k141_220193                       |          | 3186 | No  | NA | 0    | 3 | Low-quality    | Genome-fragment | 3.88            | 0     |       |
| S12-final-viral-combined_k141_42972  | [H2gene] | 1224 | No  | NA | 0    | 0 | Not-determined | Genome-fragment | NA              | 0     |       |
| S8_k141_202741                       |          | 3186 | Yes | NA | 729  | 1 | 1              | Low-quality     | Genome-fragment | 0.33  | 77.12 |
| S12-final-viral-combined_k141_243596 | [H2gene] | 1392 | No  | NA | 0    | 0 | Not-determined | Genome-fragment | NA              | 0     |       |
| S11-final-viral-combined_k141_302243 | [full]   | 3188 | No  | NA | 0    | 0 | Low-quality    | Genome-fragment | 2.39            | 0     |       |
| S7-final-viral-combined_k141_126021  | [full]   | 3190 | No  | NA | 2    | 0 | Low-quality    | Genome-fragment | 5               | 0     |       |
| S1-final-viral-combined_k141_267982  | [full]   | 3191 | No  | NA | 0    | 3 | Low-quality    | Genome-fragment | 1.54            | 0     |       |
| S1-final-viral-combined_k141_128806  | [full]   | 3191 | No  | NA | 0    | 3 | Low-quality    | Genome-fragment | 5.99            | 0     |       |
| S12-final-viral-combined_k141_9176   | [H2gene] | 1341 | No  | NA | 0    | 1 | Not-determined | Genome-fragment | NA              | 0     |       |
| S1-final-viral-combined_k141_341729  | [full]   | 3191 | No  | NA | 0    | 0 | Low-quality    | Genome-fragment | 6.61            | 0     |       |
| S12-final-viral-combined_k141_160512 | [H2gene] | 1135 | No  | NA | 0    | 0 | Not-determined | Genome-fragment | NA              | 0     |       |
| S12-final-viral-combined_k141_74091  | [full]   | 3191 | No  | NA | 0    | 0 | Low-quality    | Genome-fragment | 7.13            | 0     |       |
| S11-final-viral-combined_k141_303354 | [full]   | 3192 | No  | NA | 3    | 0 | Low-quality    | Genome-fragment | 5.28            | 0     |       |
| S1_k141_371977                       |          | 3192 | No  | NA | 0    | 3 | Low-quality    | Genome-fragment | 6.98            | 0     |       |
| S12-final-viral-combined_k141_39565  | [H2gene] | 2475 | No  | NA | 0    | 0 | Not-determined | Genome-fragment | NA              | 0     |       |
| S12-final-viral-combined_k141_243976 | [H2gene] | 1390 | No  | NA | 0    | 1 | Not-determined | Genome-fragment | NA              | 0     |       |
| S17-final-viral-combined_k141_26999  | [full]   | 3192 | No  | NA | 0    | 0 | Low-quality    | Genome-fragment | 5.92            | 0     |       |
| S12-final-viral-combined_k141_77666  | [H2gene] | 2056 | No  | NA | 0    | 0 | Not-determined | Genome-fragment | NA              | 0     |       |
| S17-final-viral-combined_k141_56682  | [full]   | 3193 | No  | NA | 0    | 1 | Low-quality    | Genome-fragment | 6.77            | 0     |       |
| S12-final-viral-combined_k141_377264 | [H2gene] | 1036 | No  | NA | 0    | 0 | Not-determined | Genome-fragment | NA              | 0     |       |
| S4-final-viral-combined_k141_140017  | [full]   | 3194 | No  | NA | 0    | 3 | Low-quality    | Genome-fragment | 1.44            | 0     |       |
| S12-final-viral-combined_k141_44213  | [H2gene] | 1324 | No  | NA | 0    | 0 | Not-determined | Genome-fragment | NA              | 0     |       |
| S12-final-viral-combined_k141_395165 | [H2gene] | 1310 | No  | NA | 0    | 0 | Not-determined | Genome-fragment | NA              | 0     |       |
| S1-final-viral-combined_k141_212181  | [full]   | 3195 | No  | NA | 0    | 1 | Low-quality    | Genome-fragment | 3.18            | 0     |       |
| S1-final-viral-combined_k141_138741  | [full]   | 3195 | No  | NA | 0    | 1 | Low-quality    | Genome-fragment | 7.52            | 0     |       |
| S12-final-viral-combined_k141_295407 | [H2gene] | 1802 | No  | NA | 0    | 0 | Not-determined | Genome-fragment | NA              | 0     |       |
| S12-final-viral-combined_k141_119547 | [full]   | 3195 | No  | NA | 0    | 4 | Low-quality    | Genome-fragment | 1.02            | 0     |       |
| S12-final-viral-combined_k141_212134 | [H2gene] | 1750 | No  | NA | 0    | 0 | Not-determined | Genome-fragment | NA              | 0     |       |
| S12-final-viral-combined_k141_115262 | [H2gene] | 3195 | No  | NA | 1    | 0 | Low-quality    | Genome-fragment | 6.81            | 0     |       |
| S12-final-viral-combined_k141_295648 | [H2gene] | 1280 | No  | NA | 0    | 1 | Not-determined | Genome-fragment | NA              | 0     |       |
| S11-final-viral-combined_k141_202122 | [full]   | 3196 | No  | NA | 2    | 0 | Low-quality    | Genome-fragment | 4.95            | 0     |       |
| S1-final-viral-combined_k141_205018  | [full]   | 3196 | No  | NA | 0    | 0 | Low-quality    | Genome-fragment | 8.55            | 0     |       |
| S9-final-viral-combined_k141_126119  | [full]   | 3197 | No  | NA | 0    | 3 | Low-quality    | Genome-fragment | 3.74            | 0     |       |
| S12-final-viral-combined_k141_395592 | [H2gene] | 1015 | No  | NA | 0    | 0 | Not-determined | Genome-fragment | NA              | 0     |       |
| S1_k141_395133                       |          | 3197 | No  | NA | 0    | 0 | Low-quality    | Genome-fragment | 7.54            | 0     |       |
| S2_k141_120242                       |          | 3197 | No  | NA | 0    | 0 | Low-quality    | Genome-fragment | 4.4             | 0     |       |
| S1-final-viral-combined_k141_311831  | [full]   | 3198 | No  | NA | 1    | 0 | Low-quality    | Genome-fragment | 5.81            | 0     |       |
| S3_k141_94901                        |          | 3198 | No  | NA | 1    | 0 | Low-quality    | Genome-fragment | 5.79            | 0     |       |
| S7_k141_91120                        |          | 3198 | No  | NA | 0    | 4 | Low-quality    | Genome-fragment | 3.48            | 0     |       |
| S12-final-viral-combined_k141_44944  | [H2gene] | 1453 | No  | NA | 0    | 0 | Not-determined | Genome-fragment | NA              | 0     |       |
| S2-final-viral-combined_k141_207191  | [full]   | 3198 | No  | NA | 0    | 0 | Low-quality    | Genome-fragment | 6.47            | 0     |       |
| S4-final-viral-combined_k141_105507  | [full]   | 3198 | No  | NA | 0    | 0 | Low-quality    | Genome-fragment | 3.76            | 0     |       |
| S6-final-viral-combined_k141_629     | [full]   | 3198 | No  | NA | 0    | 1 | Low-quality    | Genome-fragment | 5.84            | 0     |       |
| S1_k141_109191                       |          | 3199 | No  | NA | 0    | 0 | Low-quality    | Genome-fragment | 2.73            | 0     |       |
| S17-final-viral-combined_k141_51277  | [full]   | 3199 | No  | NA | 1    | 0 | Low-quality    | Genome-fragment | 5.65            | 0     |       |
| S2-final-viral-combined_k141_104200  | [full]   | 3199 | No  | NA | 0    | 3 | Low-quality    | Genome-fragment | 2.59            | 0     |       |
| S8_k141_110686                       |          | 3199 | No  | NA | 0    | 1 | Low-quality    | Genome-fragment | 1.72            | 0     |       |
| S12-final-viral-combined_k141_178214 | [H2gene] | 1100 | No  | NA | 0    | 0 | Not-determined | Genome-fragment | NA              | 0     |       |
| S12-final-viral-combined_k141_10619  | [H2gene] | 1447 | No  | NA | 0    | 0 | Not-determined | Genome-fragment | NA              | 0     |       |
| S1-final-viral-combined_k141_207856  | [full]   | 3200 | No  | NA | 0    | 0 | Low-quality    | Genome-fragment | 8.62            | 0     |       |
| S5-final-viral-combined_k141_33215   | [full]   | 3200 | No  | NA | 3    | 0 | Low-quality    | Genome-fragment | 8.01            | 0     |       |
| S1-final-viral-combined_k141_167466  | [full]   | 3201 | No  | NA | 1    | 0 | Low-quality    | Genome-fragment | 2.04            | 0     |       |
| S3_k141_5095                         |          | 3201 | No  | NA | 2    | 0 | Low-quality    | Genome-fragment | 5.3             | 0     |       |
| S12-final-viral-combined_k141_45688  | [H2gene] | 2024 | No  | NA | 0    | 0 | Not-determined | Genome-fragment | NA              | 0     |       |
| S12-final-viral-combined_k141_296509 | [H2gene] | 1073 | No  | NA | 0    | 0 | Not-determined | Genome-fragment | NA              | 0     |       |
| S12_k141_215106                      |          | 3201 | No  | NA | 3    | 0 | Low-quality    | Genome-fragment | 5.79            | 0     |       |
| S2_k141_174802                       |          | 3201 | No  | NA | 2    | 0 | Low-quality    | Genome-fragment | 3.65            | 0     |       |
| S3-final-viral-combined_k141_112327  | [full]   | 3202 | No  | NA | 0    | 2 | Low-quality    | Genome-fragment | 1.39            | 0     |       |
| S3_k141_114964                       |          | 3202 | No  | NA | 0    | 1 | Low-quality    | Genome-fragment | 3.01            | 0     |       |
| S7-final-viral-combined_k141_84272   | [full]   | 3202 | No  | NA | 0    | 1 | Low-quality    | Genome-fragment | 1.79            | 0     |       |
| S12-final-viral-combined_k141_212807 | [H2gene] | 1049 | No  | NA | 0    | 0 | Not-determined | Genome-fragment | NA              | 0     |       |
| S12-final-viral-combined_k141_11477  | [H2gene] | 1113 | No  | NA | 0    | 0 | Not-determined | Genome-fragment | NA              | 0     |       |
| S17-final-viral-combined_k141_264523 |          |      |     |    |      |   |                |                 |                 |       |       |



|                                      |          |       |     |    |      |    |                |                 |                 |       |       |
|--------------------------------------|----------|-------|-----|----|------|----|----------------|-----------------|-----------------|-------|-------|
| S17-final-viral-combined_k141_35045  | [full]   | 3216  | No  | NA | 2    | 0  | Low-quality    | Genome-fragment | 2               | 0     |       |
| S12_k141_277198                      |          | 3216  | No  | NA | 3    | 0  | Low-quality    | Genome-fragment | 2.4             | 0     |       |
| S12-final-viral-combined_k141_216660 | [H2gene] | 1305  | No  | NA | 0    | 0  | Not-determined | Genome-fragment | NA              | 0     |       |
| S12-final-viral-combined_k141_284257 | [H2gene] | 1712  | No  | NA | 0    | 0  | Not-determined | Genome-fragment | NA              | 0     |       |
| S12-final-viral-combined_k141_317884 | [H2gene] | 1714  | No  | NA | 0    | 0  | Not-determined | Genome-fragment | NA              | 0     |       |
| S4-final-viral-combined_k141_134640  | [full]   | 3217  | No  | NA | 0    | 0  | Low-quality    | Genome-fragment | 5.99            | 0     |       |
| S7-final-viral-combined_k141_155516  | [full]   | 3218  | No  | NA | 0    | 1  | Low-quality    | Genome-fragment | 1.54            | 0     |       |
| S12-final-viral-combined_k141_98960  | [H2gene] | 1315  | No  | NA | 0    | 0  | Not-determined | Genome-fragment | NA              | 0     |       |
| S8_k141_256648                       |          | 3218  | Yes | NA | 1    | 0  | Low-quality    | Genome-fragment | 0.12            | 89.15 |       |
| S12-final-viral-combined_k141_132105 | [H2gene] | 1029  | No  | NA | 0    | 0  | Not-determined | Genome-fragment | NA              | 0     |       |
| S12-final-viral-combined_k141_399957 | [H2gene] | 1087  | No  | NA | 0    | 0  | Not-determined | Genome-fragment | NA              | 0     |       |
| S9_k141_74080                        |          | 3219  | No  | NA | 0    | 1  | Low-quality    | Genome-fragment | 7.56            | 0     |       |
| S1-final-viral-combined_k141_107001  | [full]   | 3219  | No  | NA | 0    | 0  | Low-quality    | Genome-fragment | 1.64            | 0     |       |
| S1_k141_2290                         |          | 3219  | No  | NA | 0    | 1  | Low-quality    | Genome-fragment | 8.37            | 0     |       |
| S12-final-viral-combined_k141_140618 | [H2gene] | 1272  | No  | NA | 0    | 0  | Not-determined | Genome-fragment | NA              | 0     |       |
| S5-final-viral-combined_k141_297057  | [full]   | 3219  | No  | NA | 3    | 0  | Low-quality    | Genome-fragment | 9.03            | 0     |       |
| S7_k141_166395                       |          | 3219  | No  | NA | 0    | 0  | Low-quality    | Genome-fragment | 5.62            | 0     |       |
| S12-final-viral-combined_k141_56578  | [full]   | 3219  | No  | NA | 0    | 2  | Low-quality    | Genome-fragment | 1.91            | 0     |       |
| S2_k141_28021                        |          | 3219  | No  | NA | 0    | 0  | Low-quality    | Genome-fragment | 7.54            | 0     |       |
| S12_k141_392957                      |          | 3220  | No  | NA | 0    | 0  | Low-quality    | Genome-fragment | 3.18            | 0     |       |
| S1_k141_365635                       |          | 3221  | No  | NA | 0    | 1  | Low-quality    | Genome-fragment | 4.66            | 0     |       |
| S12-final-viral-combined_k141_99899  | [H2gene] | 1328  | No  | NA | 0    | 0  | Not-determined | Genome-fragment | NA              | 0     |       |
| S12-final-viral-combined_k141_384421 | [H2gene] | 1753  | No  | NA | 0    | 1  | Not-determined | Genome-fragment | NA              | 0     |       |
| S5-final-viral-combined_k141_196613  | [full]   | 3221  | No  | NA | 0    | 1  | Low-quality    | Genome-fragment | 8.07            | 0     |       |
| S17-final-viral-combined_k141_173333 | [full]   | 3221  | No  | NA | 0    | 2  | Low-quality    | Genome-fragment | 2.45            | 0     |       |
| S12-final-viral-combined_k141_297057 | [full]   | 3221  | No  | NA | 0    | 2  | Low-quality    | Genome-fragment | 3.59            | 0     |       |
| S1-final-viral-combined_k141_190010  | [full]   | 3222  | No  | NA | 0    | 0  | Low-quality    | Genome-fragment | 5.45            | 0     |       |
| S17-final-viral-combined_k141_241588 | [H2gene] | 3222  | No  | NA | 1    | 0  | Low-quality    | Genome-fragment | 6.61            | 0     |       |
| S12-final-viral-combined_k141_255858 | [full]   | 3222  | No  | NA | 0    | 0  | Low-quality    | Genome-fragment | 4.36            | 0     |       |
| S12-final-viral-combined_k141_367516 | [H2gene] | 1016  | No  | NA | 0    | 1  | Not-determined | Genome-fragment | NA              | 0     |       |
| S6-final-viral-combined_k141_188583  | [full]   | 3222  | No  | NA | 2    | 0  | Low-quality    | Genome-fragment | 6.27            | 0     |       |
| S12_k141_217609                      |          | 1014  | No  | NA | 0    | 0  | Not-determined | Genome-fragment | NA              | 0     |       |
| S12_k141_16745                       |          | 1531  | No  | NA | 0    | 1  | Not-determined | Genome-fragment | NA              | 0     |       |
| S12_k141_83709                       |          | 1584  | No  | NA | 0    | 0  | Not-determined | Genome-fragment | NA              | 0     |       |
| S12_k141_234364                      |          | 1003  | No  | NA | 0    | 1  | Not-determined | Genome-fragment | NA              | 0     |       |
| S12_k141_83713                       |          | 1518  | No  | NA | 0    | 1  | Not-determined | Genome-fragment | NA              | 0     |       |
| S12_k141_117184                      |          | 45814 | No  | NA | 0    | 19 | Not-determined | Genome-fragment | NA              | 0     |       |
| S12_k141_117196                      |          | 3776  | No  | NA | 0    | 3  | Not-determined | Genome-fragment | NA              | 0     |       |
| S12_k141_201143                      |          | 1828  | No  | NA | 0    | 2  | Not-determined | Genome-fragment | NA              | 0     |       |
| S12_k141_301366                      |          | 1037  | No  | NA | 0    | 1  | Not-determined | Genome-fragment | NA              | 0     |       |
| S12_k141_301387                      |          | 2245  | No  | NA | 0    | 0  | Not-determined | Genome-fragment | NA              | 0     |       |
| S6-final-viral-combined_k141_16246   | [full]   | 3222  | No  | NA | 1    | 0  | Low-quality    | Genome-fragment | 4.9             | 0     |       |
| S12_k141_67008                       |          | 3970  | No  | NA | 0    | 2  | Not-determined | Genome-fragment | NA              | 0     |       |
| S12_k141_301383                      |          | 1665  | No  | NA | 0    | 0  | Not-determined | Genome-fragment | NA              | 0     |       |
| S12_k141_318084                      |          | 2057  | No  | NA | 0    | 1  | Not-determined | Genome-fragment | NA              | 0     |       |
| S12_k141_167503                      |          | 1108  | No  | NA | 0    | 1  | Not-determined | Genome-fragment | NA              | 0     |       |
| S12_k141_301394                      |          | 1561  | No  | NA | 0    | 4  | Not-determined | Genome-fragment | NA              | 0     |       |
| S12_k141_134004                      |          | 4003  | No  | NA | 0    | 1  | Not-determined | Genome-fragment | NA              | 0     |       |
| S12_k141_369352                      |          | 1117  | No  | NA | 0    | 0  | Not-determined | Genome-fragment | NA              | 0     |       |
| S12_k141_334807                      |          | 1448  | No  | NA | 0    | 1  | Not-determined | Genome-fragment | NA              | 0     |       |
| S12_k141_134017                      |          | 1005  | No  | NA | 0    | 2  | Not-determined | Genome-fragment | NA              | 0     |       |
| S12_k141_16823                       |          | 2340  | No  | NA | 0    | 0  | Not-determined | Genome-fragment | NA              | 0     |       |
| S12_k141_167                         |          | 1907  | No  | NA | 0    | 0  | Not-determined | Genome-fragment | NA              | 0     |       |
| S12_k141_184276                      |          | 30698 | No  | NA | 18   | 1  | High-quality   | High-quality    | 95.99           | 0     |       |
| S12_k141_217794                      |          | 7498  | No  | NA | 0    | 3  | Not-determined | Genome-fragment | NA              | 0     |       |
| S12_k141_351619                      |          | 1298  | No  | NA | 0    | 1  | Not-determined | Genome-fragment | NA              | 0     |       |
| S12_k141_351622                      |          | 4636  | No  | NA | 0    | 0  | Not-determined | Genome-fragment | NA              | 0     |       |
| S12_k141_201107                      |          | 3155  | No  | NA | 0    | 2  | Not-determined | Genome-fragment | NA              | 0     |       |
| S12_k141_301478                      |          | 1151  | No  | NA | 0    | 1  | Not-determined | Genome-fragment | NA              | 0     |       |
| S12_k141_50445                       |          | 1566  | No  | NA | 0    | 2  | Not-determined | Genome-fragment | NA              | 0     |       |
| S12_k141_284828                      |          | 1214  | No  | NA | 0    | 0  | Not-determined | Genome-fragment | NA              | 0     |       |
| S12_k141_318246                      |          | 1844  | No  | NA | 0    | 0  | Not-determined | Genome-fragment | NA              | 0     |       |
| S12_k141_351653                      |          | 28451 | No  | NA | 0    | 13 | Not-determined | Genome-fragment | NA              | 0     |       |
| S12_k141_301576                      |          | 1176  | No  | NA | 0    | 0  | Not-determined | Genome-fragment | NA              | 0     |       |
| S5-final-viral-combined_k141_172358  | [full]   | 3223  | No  | NA | 2    | 0  | Low-quality    | Genome-fragment | 7.09            | 0     |       |
| S17-final-viral-combined_k141_234546 | [full]   | 3223  | No  | NA | 1    | 0  | Low-quality    | Genome-fragment | 4.88            | 0     |       |
| S12_k141_117385                      |          | 1330  | No  | NA | 0    | 1  | Not-determined | Genome-fragment | NA              | 0     |       |
| S12_k141_314897                      |          | 1298  | No  | NA | 0    | 4  | Not-determined | Genome-fragment | NA              | 0     |       |
| S12_k141_369473                      |          | 1351  | No  | NA | 0    | 0  | Not-determined | Genome-fragment | NA              | 0     |       |
| S12_k141_67216                       |          | 1227  | No  | NA | 0    | 0  | Not-determined | Genome-fragment | NA              | 0     |       |
| S12_k141_334902                      |          | 4424  | No  | NA | 0    | 1  | Not-determined | Genome-fragment | NA              | 0     |       |
| S12_k141_385271                      |          | 15581 | No  | NA | 29   | 0  | Not-determined | Genome-fragment | NA              | 0     |       |
| S12_k141_100688                      |          | 3128  | No  | NA | 0    | 1  | Not-determined | Genome-fragment | NA              | 0     |       |
| S12_k141_67243                       |          | 1420  | No  | NA | 0    | 1  | Not-determined | Genome-fragment | NA              | 0     |       |
| S12_k141_267999                      |          | 1183  | No  | NA | 0    | 1  | Not-determined | Genome-fragment | NA              | 0     |       |
| S12_k141_351710                      |          | 1319  | No  | NA | 0    | 1  | Not-determined | Genome-fragment | NA              | 0     |       |
| S12-final-viral-combined_k141_158119 | [full]   | 3223  | No  | NA | 0    | 0  | Low-quality    | Genome-fragment | 8.57            | 0     |       |
| S1_k141_87486                        |          | 3224  | No  | NA | 0    | 0  | Low-quality    | Genome-fragment | 3.05            | 0     |       |
| S12_k141_234576                      |          | 1048  | No  | NA | 0    | 0  | Not-determined | Genome-fragment | NA              | 0     |       |
| S12_k141_100730                      |          | 5102  | No  | NA | 0    | 5  | Not-determined | Genome-fragment | NA              | 0     |       |
| S11-final-viral-combined_k141_116212 | [full]   | 3225  | No  | NA | 4    | 0  | Low-quality    | Genome-fragment | 8.97            | 0     |       |
| S12_k141_301712                      |          | 2959  | No  | NA | 0    | 2  | Not-determined | Genome-fragment | NA              | 0     |       |
| S12_k141_318401                      |          | 3022  | No  | NA | 0    | 0  | Not-determined | Genome-fragment | NA              | 0     |       |
| S12_k141_268053                      |          | 1859  | No  | NA | 0    | 1  | Not-determined | Genome-fragment | NA              | 0     |       |
| S1-final-viral-combined_k141_25136   | [full]   | 3225  | No  | NA | 0    | 0  | Low-quality    | Genome-fragment | 2.21            | 0     |       |
| S12_k141_67308                       |          | 1933  | No  | NA | 0    | 1  | Not-determined | Genome-fragment | NA              | 0     |       |
| S12_k141_334943                      |          | 2140  | No  | NA | 0    | 0  | Not-determined | Genome-fragment | NA              | 0     |       |
| S12_k141_334957                      |          | 2747  | No  | NA | 0    | 5  | Not-determined | Genome-fragment | NA              | 0     |       |
| S12_k141_318428                      |          | 1213  | No  | NA | 0    | 3  | Not-determined | Genome-fragment | NA              | 0     |       |
| S1-final-viral-combined_k141_157991  | [full]   | 3225  | No  | NA | 0    | 3  | Low-quality    | Genome-fragment | 1.02            | 0     |       |
| S7-final-viral-combined_k141_12554   | [full]   | 3225  | Yes | NA | 2361 | 2  | 1              | Low-quality     | Genome-fragment | 2.9   | 26.79 |
| S12_k141_134294                      |          | 1558  | No  | NA | 0    | 1  | Not-determined | Genome-fragment | NA              | 0     |       |
| S12_k141_167780                      |          | 1367  | No  | NA | 0    | 0  | Not-determined | Genome-fragment | NA              | 0     |       |
| S12_k141_50619                       |          | 1029  | No  | NA | 0    | 0  | Not-determined | Genome-fragment | NA              | 0     |       |
| S12_k141_318456                      |          | 1213  | No  | NA | 0    | 0  | Not-determined | Genome-fragment | NA              | 0     |       |
| S12_k141_201146                      |          | 1497  | No  | NA | 0    | 1  | Not-determined | Genome-fragment | NA              | 0     |       |
| S12_k141_268091                      |          | 1796  | No  | NA | 0    | 0  | Not-determined | Genome-fragment | NA              | 0     |       |
| S12_k141_17160                       |          | 2468  | No  | NA | 0    | 1  | Not-determined | Genome-fragment | NA              | 0     |       |
| S12_k141_50631                       |          | 8375  | No  | NA | 0    | 0  | Not-determined | Genome-fragment | NA              | 0     |       |
| S12_k141_33998                       |          | 1300  | No  | NA | 0    | 0  | Not-determined | Genome-fragment | NA              | 0     |       |
| S12_k141_34023                       |          | 1028  | No  | NA | 0    | 2  | Not-determined | Genome-fragment | NA              | 0     |       |
| S12_k141_234725                      |          | 1268  | No  | NA | 0    | 0  | Not-determined | Genome-fragment | NA              | 0     |       |
| S5-final-viral-combined_k141_161547  | [full]   | 3227  | No  | NA | 0    | 0  | Low-quality    | Genome-fragment | 3.36            | 0     |       |
| S12_k141_471                         |          | 7288  | No  | NA | 0    | 1  | Not-determined | Genome-fragment | NA              | 0     |       |
| S12_k141_217997                      |          | 5874  | No  | NA | 0    | 2  | Not-determined | Genome-fragment | NA              | 0     |       |
| S12_k141_268134                      |          | 1305  | No  | NA | 0    | 1  | Not-determined | Genome-fragment | NA              | 0     |       |
| S12_k141_234749                      |          | 1175  | No  | NA | 0    | 1  | Not-determined | Genome-fragment | NA              | 0     |       |
| S17-final-viral-combined_k141_112257 | [full]   | 3228  | No  | NA | 0    | 2  | Low-quality    | Genome-fragment | 2.35            | 0     |       |
| S12_k141_17242                       |          | 3671  | No  | NA | 0    | 8  | Not-determined | Genome-fragment | NA              | 0     |       |
| S12_k141_50712                       |          | 7040  | No  | NA | 0    | 0  | Not-determined | Genome-fragment | NA              | 0     |       |
| S12_k141_285183                      |          | 2929  | No  | NA | 0    | 0  | Not-determined | Genome-fragment | NA              | 0     |       |
| S12_k141_50714                       |          | 2844  | No  | NA | 0    | 3  | Not-determined | Genome-fragment | NA              | 0     |       |
| S12_k141_67390                       |          | 1017  | No  | NA | 0    | 0  | Not-determined | Genome-fragment | NA              | 0     |       |
| S12_k141_351747                      |          | 4005  | No  | NA | 0    | 0  | Not-determined | Genome-fragment | NA              | 0     |       |
| S12_k141_318600                      |          | 1185  | No  | NA | 0    | 0  | Not-determined | Genome-fragment | NA              | 0     |       |
| S12_k141_60072                       |          | 3228  | No  | NA | 1    | 0  | Low-quality    | Genome-fragment | 8.79            | 0     |       |
| S12_k141_318618                      |          | 2449  | No  | NA | 0    | 1  | Not-determined | Genome-fragment | NA              | 0     |       |
| S12_k141_50772                       |          | 1614  | No  | NA | 0    | 1  | Not-determined | Genome-fragment | NA              | 0     |       |
| S17-final-viral-combined_k141_20713  | [full]   | 3229  | No  | NA | 0    | 1  | Low-quality    | Genome-fragment | 6.58            | 0     |       |
| S12_k141_318651                      |          | 6133  | No  | NA | 0    | 5  | Not-determined | Genome-fragment | NA              | 0     |       |
| S12_k141_318659                      |          | 1247  | No  | NA | 0    | 1  | Not-determined | Genome-fragment | NA              | 0     |       |
| S12_k141_369713                      |          | 2764  | No  | NA | 0    | 2  | Not-determined | Genome-fragment | NA              | 0     |       |
| S1-final-viral-combined_k141_392693  | [full]   | 3230  | No  | NA | 0    | 2  | Low-quality    | Genome-fragment | 2.24            | 0     |       |
| S12_k141_201304                      |          | 1156  | No  | NA | 0    | 0  | Not-determined | Genome-fragment | NA              | 0     |       |
| S12_k141_234828                      |          | 5005  | No  | NA | 0    | 0  | Not-determined | Genome-fragment | NA              | 0     |       |
| S12_k141_285256                      |          | 2214  | No  | NA | 0    | 1  | Not-determined | Genome-fragment | NA              | 0     |       |
| S12_k141_100979                      |          | 8392  | No  | NA | 0    | 4  | Not-determined | Genome-fragment | NA              | 0     |       |
| S12_k141_285264                      |          | 1670  | No  | NA | 0    | 2  | Not-determined | Genome-fragment | NA              | 0     |       |
| S12_k141_285281                      |          | 1857  | No  | NA | 0    | 0  | Not-determined | Genome-fragment | NA              | 0     |       |
| S7-final-viral-combined_k141_175740  | [full]   | 3230  | Yes | NA | 720  | 1  | 3              | Low-quality     | Genome-fragment | 0.31  | 77.71 |
| S12_k141_285298                      |          | 1186  | No  | NA | 0    | 0  | Not-determined | Genome-fragment | NA              | 0     |       |
| S12_k141_682                         |          | 5257  | No  | NA | 0    | 2  | Not-determined | Genome-fragment | NA              | 0     |       |
| S12_k141_67502                       |          | 1004  | No  | NA | 0    | 0  | Not-determined | Genome-fragment | NA              | 0     |       |
| S12_k141_50871                       |          | 1214  | No  | NA | 0    | 0  | Not-determined | Genome-fragment | NA              | 0     |       |
| S12_k141_335337                      |          | 5322  | No  | NA | 0    | 6  | Not-determined | Genome-fragment | NA              | 0     |       |
| S7_k141_223725                       |          | 3230  | No  | NA | 0    | 3  | Low-quality    | Genome-fragment | 1.01            | 0     |       |
| S5-final-viral-combined_k141_132138  | [full]   | 32    |     |    |      |    |                |                 |                 |       |       |



|                                            |       |     |    |      |             |                  |                 |                 |       |
|--------------------------------------------|-------|-----|----|------|-------------|------------------|-----------------|-----------------|-------|
| S12_k141_368977                            | 1732  | No  | NA | 0    | 1           | Not-determined   | Genome-fragment | NA              | 0     |
| S12_k141_34398                             | 3263  | No  | NA | 0    | 2           | Not-determined   | Genome-fragment | NA              | 0     |
| S12_k141_51065                             | 4759  | No  | NA | 0    | 1           | Not-determined   | Genome-fragment | NA              | 0     |
| S2_k141_24253                              | 3236  | No  | NA | 0    | 2           | Low-quality      | Genome-fragment | 1.66            | 0     |
| S2-final-viral-combined_k141_145207[[full  | 3237  | No  | NA | 0    | 2           | Low-quality      | Genome-fragment | 1.03            | 0     |
| S12_k141_302103                            | 3013  | No  | NA | 0    | 5           | Not-determined   | Genome-fragment | NA              | 0     |
| S12_k141_235125                            | 23589 | No  | NA | 1    | 0           | Medium-quality   | Genome-fragment | 55.38           | 0     |
| S12_k141_201673                            | 5153  | No  | NA | 0    | 1           | Not-determined   | Genome-fragment | NA              | 0     |
| S12_k141_101153                            | 2254  | No  | NA | 0    | 1           | Not-determined   | Genome-fragment | NA              | 0     |
| S12_k141_268553                            | 1428  | No  | NA | 0    | 0           | Not-determined   | Genome-fragment | NA              | 0     |
| S2_k141_114224                             | 3237  | Yes | NA | 2189 | 1           | 1                | Low-quality     | Genome-fragment | 3.92  |
| S12_k141_369055                            | 1946  | No  | NA | 0    | 2           | Not-determined   | Genome-fragment | NA              | 32.38 |
| S12_k141_101207                            | 2638  | No  | NA | 0    | 2           | Not-determined   | Genome-fragment | NA              | 0     |
| S8-final-viral-combined_k141_111114[[full  | 3237  | No  | NA | 0    | 1           | Low-quality      | Genome-fragment | 6.2             | 0     |
| S11-final-viral-combined_k141_248146[[full | 3238  | No  | NA | 0    | 1           | Low-quality      | Genome-fragment | 1.59            | 0     |
| S7-final-viral-combined_k141_34963[[full   | 3238  | No  | NA | 0    | 1           | Low-quality      | Genome-fragment | 3.95            | 0     |
| S12-final-viral-combined_k141_47180[[full  | 3238  | No  | NA | 0    | 0           | Low-quality      | Genome-fragment | 7.03            | 0     |
| S12_k141_285662                            | 2744  | No  | NA | 0    | 1           | Not-determined   | Genome-fragment | NA              | 0     |
| S17-k141_170969                            | 3229  | No  | NA | 0    | 1           | Low-quality      | Genome-fragment | 2.75            | 0     |
| S12_k141_352070                            | 1274  | No  | NA | 0    | 1           | Not-determined   | Genome-fragment | NA              | 0     |
| S12_k141_201706                            | 2184  | No  | NA | 0    | 1           | Not-determined   | Genome-fragment | NA              | 0     |
| S12_k141_171717                            | 4221  | No  | NA | 0    | 2           | Not-determined   | Genome-fragment | NA              | 0     |
| S12_k141_251853                            | 1291  | No  | NA | 0    | 0           | Not-determined   | Genome-fragment | NA              | 0     |
| S12_k141_285727                            | 1522  | No  | NA | 0    | 1           | Not-determined   | Genome-fragment | NA              | 0     |
| S12_k141_352087                            | 1232  | No  | NA | 0    | 0           | Not-determined   | Genome-fragment | NA              | 0     |
| S8-final-viral-combined_k141_105589[[full  | 3239  | No  | NA | 1    | 0           | Low-quality      | Genome-fragment | 8.72            | 0     |
| S12_k141_302224                            | 2598  | No  | NA | 0    | 1           | Not-determined   | Genome-fragment | NA              | 0     |
| S5_k141_209303                             | 3240  | No  | NA | 1    | 0           | Low-quality      | Genome-fragment | 5.43            | 0     |
| S12_k141_215221                            | 3545  | No  | NA | 0    | 0           | Not-determined   | Genome-fragment | NA              | 0     |
| S12_k141_268651                            | 2278  | No  | NA | 0    | 0           | Not-determined   | Genome-fragment | NA              | 0     |
| S17-k141_103752                            | 3240  | No  | NA | 1    | 0           | Low-quality      | Genome-fragment | 5.03            | 0     |
| S8_k141_71716                              | 3241  | No  | NA | 1    | 0           | Low-quality      | Genome-fragment | 3.95            | 0     |
| S7-final-viral-combined_k141_163551[[full  | 3242  | No  | NA | 0    | 2           | Low-quality      | Genome-fragment | 10.9            | 0     |
| S2-final-viral-combined_k141_712951[[full  | 3242  | No  | NA | 2    | 0           | Low-quality      | Genome-fragment | 8.83            | 0     |
| S12_k141_268753                            | 2761  | No  | NA | 0    | 1           | Not-determined   | Genome-fragment | NA              | 0     |
| S12_k141_208764                            | 1100  | No  | NA | 0    | 0           | Not-determined   | Genome-fragment | NA              | 0     |
| S12_k141_134864                            | 5842  | No  | NA | 0    | 1           | Not-determined   | Genome-fragment | NA              | 0     |
| S12_k141_268771                            | 2261  | No  | NA | 0    | 0           | Not-determined   | Genome-fragment | NA              | 0     |
| S12_k141_34724                             | 8596  | No  | NA | 0    | 0           | Not-determined   | Genome-fragment | NA              | 0     |
| S12_k141_168338                            | 3322  | No  | NA | 0    | 0           | Not-determined   | Genome-fragment | NA              | 0     |
| S12_k141_101370                            | 15744 | No  | NA | 0    | 5           | Not-determined   | Genome-fragment | NA              | 0     |
| S12_k141_17950                             | 11870 | No  | NA | 7    | 0           | Medium-quality   | Genome-fragment | 89.5            | 0     |
| S2-final-viral-combined_k141_225691[[full  | 3242  | No  | NA | 1    | 0           | Low-quality      | Genome-fragment | 2.66            | 0     |
| S12_k141_201818                            | 1093  | No  | NA | 0    | 1           | Not-determined   | Genome-fragment | NA              | 0     |
| S12_k141_315526                            | 1012  | No  | NA | 0    | 0           | Not-determined   | Genome-fragment | NA              | 0     |
| S11-final-viral-combined_k141_247407[[full | 3243  | No  | NA | 0    | 0           | Low-quality      | Genome-fragment | 6.98            | 0     |
| S12_k141_67919                             | 1157  | No  | NA | 0    | 1           | Not-determined   | Genome-fragment | NA              | 0     |
| S12_k141_201857                            | 1141  | No  | NA | 0    | 0           | Not-determined   | Genome-fragment | NA              | 0     |
| S2-final-viral-combined_k141_129338[[full  | 3243  | No  | NA | 0    | 0           | Low-quality      | Genome-fragment | 3.91            | 0     |
| S12_k141_335549                            | 1092  | No  | NA | 0    | 0           | Not-determined   | Genome-fragment | NA              | 0     |
| S12_k141_268820                            | 10662 | No  | NA | 0    | 8           | Not-determined   | Genome-fragment | NA              | 0     |
| S12_k141_34767                             | 3028  | No  | NA | 0    | 0           | Not-determined   | Genome-fragment | NA              | 0     |
| S12_k141_369162                            | 1494  | No  | NA | 0    | 1           | Not-determined   | Genome-fragment | NA              | 0     |
| S12_k141_352255                            | 1157  | No  | NA | 0    | 0           | Not-determined   | Genome-fragment | NA              | 0     |
| S12_k141_134927                            | 3108  | No  | NA | 0    | 3           | Not-determined   | Genome-fragment | NA              | 0     |
| S6_k141_40182                              | 3243  | No  | NA | 0    | 0           | Low-quality      | Genome-fragment | 3.43            | 0     |
| S12_k141_201878                            | 2041  | No  | NA | 0    | 1           | Not-determined   | Genome-fragment | NA              | 0     |
| S12_k141_185197                            | 1415  | No  | NA | 0    | 1           | Not-determined   | Genome-fragment | NA              | 0     |
| S12_k141_101427                            | 7039  | No  | NA | 0    | 3           | Not-determined   | Genome-fragment | NA              | 0     |
| S12_k141_335612                            | 5661  | No  | NA | 0    | 4           | Not-determined   | Genome-fragment | NA              | 0     |
| S12_k141_84776                             | 3391  | No  | NA | 0    | 0           | Not-determined   | Genome-fragment | NA              | 0     |
| S8_k141_224085                             | 3243  | No  | NA | 5    | 0           | Low-quality      | Genome-fragment | 10.08           | 0     |
| S12_k141_101447                            | 1950  | No  | NA | 0    | 1           | Not-determined   | Genome-fragment | NA              | 0     |
| S8_k141_120545                             | 3243  | No  | NA | 1    | 0           | Low-quality      | Genome-fragment | 2.43            | 0     |
| S12_k141_168427                            | 1729  | No  | NA | 0    | 1           | Not-determined   | Genome-fragment | NA              | 0     |
| S12_k141_34835                             | 1009  | No  | NA | 0    | 0           | Not-determined   | Genome-fragment | NA              | 0     |
| S12_k141_352336                            | 2001  | No  | NA | 0    | 1           | Not-determined   | Genome-fragment | NA              | 0     |
| S12_k141_1193                              | 2571  | No  | NA | 0    | 1           | Not-determined   | Genome-fragment | NA              | 0     |
| S12_k141_302419                            | 3415  | No  | NA | 0    | 0           | Not-determined   | Genome-fragment | NA              | 0     |
| S12_k141_117951                            | 1344  | No  | NA | 0    | 1           | Not-determined   | Genome-fragment | NA              | 0     |
| S12_k141_101474                            | 3255  | No  | NA | 0    | 0           | Not-determined   | Genome-fragment | NA              | 0     |
| S11-final-viral-combined_k141_266398[[full | 3244  | No  | NA | 2    | Low-quality | Genome-fragment  | 1.73            | 0               |       |
| S12_k141_319215                            | 1631  | No  | NA | 0    | 0           | Not-determined   | Genome-fragment | NA              | 0     |
| S12_k141_268929                            | 1207  | No  | NA | 0    | 0           | Not-determined   | Genome-fragment | NA              | 0     |
| S12_k141_12108                             | 1278  | No  | NA | 0    | 0           | Not-determined   | Genome-fragment | NA              | 0     |
| S12-final-viral-combined_k141_252401[[full | 3244  | No  | NA | 1    | 0           | Low-quality      | Genome-fragment | 4.76            | 0     |
| S12-final-viral-combined_k141_27496[[full  | 3244  | No  | NA | 0    | 0           | Low-quality      | Genome-fragment | 7.62            | 0     |
| S12_k141_319242                            | 1429  | No  | NA | 0    | 0           | Not-determined   | Genome-fragment | NA              | 0     |
| S12_k141_51347                             | 1250  | No  | NA | 0    | 1           | Not-determined   | Genome-fragment | NA              | 0     |
| S12_k141_117981                            | 1820  | No  | NA | 0    | 1           | Not-determined   | Genome-fragment | NA              | 0     |
| S12_k141_84833                             | 2683  | No  | NA | 0    | 0           | Not-determined   | Genome-fragment | NA              | 0     |
| S12_k141_511374                            | 4681  | No  | NA | 0    | 1           | Not-determined   | Genome-fragment | NA              | 0     |
| S12_k141_51376                             | 1074  | No  | NA | 0    | 1           | Not-determined   | Genome-fragment | NA              | 0     |
| S2_k141_43409                              | 3244  | No  | NA | 0    | 2           | Low-quality      | Genome-fragment | 1.49            | 0     |
| S12_k141_51423                             | 1157  | No  | NA | 0    | 1           | Not-determined   | Genome-fragment | NA              | 0     |
| S12_k141_68068                             | 2324  | No  | NA | 0    | 2           | Not-determined   | Genome-fragment | NA              | 0     |
| S12_k141_18055                             | 1154  | No  | NA | 0    | 0           | Not-determined   | Genome-fragment | NA              | 0     |
| S2-final-viral-combined_k141_329791[[full  | 3245  | No  | NA | 0    | 0           | Low-quality      | Genome-fragment | 7.59            | 0     |
| S12_k141_118053                            | 3017  | No  | NA | 0    | 1           | Not-determined   | Genome-fragment | NA              | 0     |
| S12_k141_168543                            | 1242  | No  | NA | 0    | 1           | Not-determined   | Genome-fragment | NA              | 0     |
| S6_k141_35748                              | 3245  | No  | NA | 0    | 2           | Low-quality      | Genome-fragment | 0.62            | 0     |
| S12_k141_185387                            | 1068  | No  | NA | 0    | 1           | Not-determined   | Genome-fragment | NA              | 0     |
| S12_k141_269001                            | 6049  | No  | NA | 0    | 6           | Not-determined   | Genome-fragment | NA              | 0     |
| S11_k141_123858                            | 3246  | No  | NA | 4    | 0           | Low-quality      | Genome-fragment | 7.93            | 0     |
| S12_k141_309517                            | 4213  | No  | NA | 0    | 0           | Not-determined   | Genome-fragment | NA              | 0     |
| S12_k141_202017                            | 3667  | No  | NA | 0    | 0           | Not-determined   | Genome-fragment | NA              | 0     |
| S12_k141_51478                             | 6878  | No  | NA | 0    | 5           | Not-determined   | Genome-fragment | NA              | 0     |
| S12-final-viral-combined_k141_155410[[full | 3247  | No  | NA | 0    | 2           | Low-quality      | Genome-fragment | 1.14            | 0     |
| S12_k141_285969                            | 1278  | No  | NA | 0    | 0           | Not-determined   | Genome-fragment | NA              | 0     |
| S12_k141_302588                            | 1085  | No  | NA | 0    | 1           | Not-determined   | Genome-fragment | NA              | 0     |
| S12_k141_319300                            | 1070  | No  | NA | 0    | 0           | Not-determined   | Genome-fragment | NA              | 0     |
| S12_k141_115073                            | 1113  | No  | NA | 0    | 1           | Not-determined   | Genome-fragment | NA              | 0     |
| S12_k141_352538                            | 1225  | No  | NA | 0    | 0           | Not-determined   | Genome-fragment | NA              | 0     |
| S12_k141_202052                            | 4652  | No  | NA | 0    | 2           | Not-determined   | Genome-fragment | NA              | 0     |
| S12_k141_68176                             | 2115  | No  | NA | 0    | 0           | Not-determined   | Genome-fragment | NA              | 0     |
| S12_k141_319344                            | 1616  | No  | NA | 0    | 0           | Not-determined   | Genome-fragment | NA              | 0     |
| S12_k141_1361                              | 1211  | No  | NA | 0    | 1           | Not-determined   | Genome-fragment | NA              | 0     |
| S12_k141_151796                            | 2538  | No  | NA | 0    | 0           | Not-determined   | Genome-fragment | NA              | 0     |
| S12_k141_286005                            | 1336  | No  | NA | 0    | 0           | Not-determined   | Genome-fragment | NA              | 0     |
| S12_k141_85009                             | 14995 | No  | NA | 0    | 9           | Not-determined   | Genome-fragment | NA              | 0     |
| S8-final-viral-combined_k141_126804[[full  | 3249  | No  | NA | 0    | 1           | Low-quality      | Genome-fragment | 6.8             | 0     |
| S12_k141_319776                            | 1505  | No  | NA | 0    | 0           | Not-determined   | Genome-fragment | NA              | 0     |
| S12_k141_34929                             | 3687  | No  | NA | 0    | 1           | Not-determined   | Genome-fragment | NA              | 0     |
| S12_k141_335781                            | 1000  | No  | NA | 0    | 1           | Not-determined   | Genome-fragment | NA              | 0     |
| S9_k141_59086                              | 2349  | No  | NA | 0    | 1           | Low-quality      | Genome-fragment | 3.46            | 0     |
| S12_k141_168893                            | 2346  | No  | NA | 0    | 1           | Not-determined   | Genome-fragment | NA              | 0     |
| S12_k141_269130                            | 1120  | No  | NA | 0    | 0           | Not-determined   | Genome-fragment | NA              | 0     |
| S12_k141_335797                            | 1656  | No  | NA | 0    | 1           | Not-determined   | Genome-fragment | NA              | 0     |
| S12_k141_18123                             | 1213  | No  | NA | 0    | 0           | Not-determined   | Genome-fragment | NA              | 0     |
| S12-final-viral-combined_k141_8118[[full   | 3249  | No  | NA | 0    | 1           | Low-quality      | Genome-fragment | 2.59            | 0     |
| S12_k141_153167                            | 1425  | No  | NA | 0    | 0           | Not-determined   | Genome-fragment | NA              | 0     |
| S12_k141_286045                            | 5043  | No  | NA | 0    | 0           | Not-determined   | Genome-fragment | NA              | 0     |
| S2-final-viral-combined_k141_186421[[full  | 3249  | No  | NA | 1    | 2           | Low-quality      | Genome-fragment | 7.89            | 0     |
| S12-final-viral-combined_k141_23219[[full  | 3249  | No  | NA | 0    | 2           | Low-quality      | Genome-fragment | 1.62            | 0     |
| S12_k141_185545                            | 3028  | No  | NA | 0    | 1           | Not-determined   | Genome-fragment | NA              | 0     |
| S12_k141_218877                            | 2208  | No  | NA | 0    | 0           | Not-determined   | Genome-fragment | NA              | 0     |
| S12_k141_1510                              | 1578  | No  | NA | 0    | 1           | Not-determined   | Genome-fragment | NA              | 0     |
| S12_k141_218883                            | 2454  | No  | NA | 0    | 2           | Not-determined   | Genome-fragment | NA              | 0     |
| S12_k141_202104                            | 1453  | No  | NA | 0    | 0           | Not-determined   | Genome-fragment | NA              | 0     |
| S2-final-viral-combined_k141_171011[[full  | 3249  | No  | NA | 0    | 0           | Low-quality      | Genome-fragment | 6.71            | 0     |
| S12_k141_315833                            | 1533  | No  | NA | 0    | 1           | Not-determined   | Genome-fragment | NA              | 0     |
| S12_k141_218891                            | 6999  | No  | NA | 0    | 0           | Not-determined   | Genome-fragment | NA              | 0     |
| S12_k141_386424                            | 4502  | No  | NA | 0    | 2           | Not-determined   | Genome-fragment | NA              | 0     |
| S2-final-viral-combined_k141_195391[[full  | 3249  | No  | NA | 1    | 0           | Low-quality      | Genome-fragment | 7.85            | 0     |
| S12_k141_681253                            | 1166  | No  | NA | 0    | 2           | Not-determined   | Genome-fragment | NA              | 0     |
| S12_k141_185603                            | 1570  | No  | NA | 0    | 0           | Not-determined   | Genome-fragment | NA              | 0     |
| S12_k141_386457                            | 1085  | No  | NA | 0    | 1           | Not-determined   | Genome-fragment | NA              | 0     |
| S12_k141_215677                            | 1087  | No  | NA | 0    | 0           | Not-determined   | Genome-fragment | NA              | 0     |
| S12_k141_35052                             | 1227  | No  | NA | 0    | 0           | Not-determined   | Genome-fragment | NA              | 0     |
| S12_k141_118217                            | 1556  | No  | NA | 0    | 0           | Not-determined   | Genome-fragment | NA              | 0     |
| S12_k141_185673                            | 6014  | No  | NA | 0    | 1           | Not-determined   | Genome-fragment | NA              | 0     |
| S12_k141_60295                             | 3250  | No  | NA | 0    | 1           | Low-quality      | Genome-fragment | 2.92            | 0     |
| S12_k141_101766                            | 2263  | No  | NA | 0    | 1           | Not-determined   | Genome-fragment | NA              | 0     |
| S12_k141_153291                            | 35092 | No  | NA | 1    | 11          | Medium-quality   | Genome-fragment | 50.05           | 0     |
| S12_k141_151863                            | 1141  | No  | NA | 0    | 1           | Not-determined</ |                 |                 |       |



|                                                |       |     |    |      |   |                |                 |       |       |
|------------------------------------------------|-------|-----|----|------|---|----------------|-----------------|-------|-------|
| S12_k141_336019                                | 1164  | No  | NA | 0    | 0 | Not-determined | Genome-fragment | NA    | 0     |
| S12_k141_360991                                | 2564  | No  | NA | 0    | 2 | Not-determined | Genome-fragment | NA    | 0     |
| S12_k141_302972                                | 1071  | No  | NA | 0    | 1 | Not-determined | Genome-fragment | NA    | 0     |
| S12_k141_302993                                | 1071  | No  | NA | 0    | 1 | Not-determined | Genome-fragment | NA    | 0     |
| S12_k141_51826                                 | 11676 | No  | NA | 0    | 2 | Not-determined | Genome-fragment | NA    | 0     |
| S12_k141_319710                                | 6217  | No  | NA | 0    | 0 | Not-determined | Genome-fragment | NA    | 0     |
| S12_k141_51845                                 | 1445  | No  | NA | 0    | 1 | Not-determined | Genome-fragment | NA    | 0     |
| S12_k141_1849                                  | 3288  | No  | NA | 0    | 0 | Not-determined | Genome-fragment | NA    | 0     |
| S17-final-viral-combined_k141_927301[full]     | 3252  | No  | NA | 0    | 1 | Low-quality    | Genome-fragment | NA    | 6.93  |
| S12_k141_219167                                | 1086  | No  | NA | 0    | 0 | Not-determined | Genome-fragment | NA    | 0     |
| S12_k141_352846                                | 67870 | No  | NA | 5    | 0 | High-quality   | High-quality    | 98.66 | 0     |
| S1_k141_140751                                 | 3253  | No  | NA | 0    | 0 | Low-quality    | Genome-fragment | NA    | 4.95  |
| S12_k141_1871                                  | 1040  | No  | NA | 0    | 1 | Not-determined | Genome-fragment | NA    | 0     |
| S12_k141_386692                                | 40153 | No  | NA | 8    | 1 | Complete       | High-quality    | 100   | 0     |
| S12_k141_51854                                 | 1263  | No  | NA | 0    | 0 | Not-determined | Genome-fragment | NA    | 0     |
| S12_k141_370050                                | 2120  | No  | NA | 0    | 2 | Not-determined | Genome-fragment | NA    | 0     |
| S12_k141_169042                                | 4320  | No  | NA | 0    | 2 | Not-determined | Genome-fragment | NA    | 0     |
| S12_k141_151046                                | 3255  | No  | NA | 0    | 0 | Low-quality    | Genome-fragment | NA    | 6.88  |
| S12_k141_386704                                | 2708  | No  | NA | 0    | 2 | Not-determined | Genome-fragment | NA    | 0     |
| S8_k141_6190                                   | 3255  | No  | NA | 0    | 2 | Low-quality    | Genome-fragment | NA    | 0.74  |
| S8_k141_43671                                  | 3255  | No  | NA | 0    | 1 | Low-quality    | Genome-fragment | NA    | 7     |
| S12_k141_286341                                | 3426  | No  | NA | 0    | 1 | Not-determined | Genome-fragment | NA    | 0     |
| S12_k141_286348                                | 1334  | No  | NA | 0    | 1 | Not-determined | Genome-fragment | NA    | 0     |
| S12_k141_169087                                | 1508  | No  | NA | 0    | 2 | Not-determined | Genome-fragment | NA    | 0     |
| S12_k141_85409                                 | 1183  | No  | NA | 0    | 0 | Not-determined | Genome-fragment | NA    | 0     |
| S12_k141_51890                                 | 1167  | No  | NA | 0    | 0 | Not-determined | Genome-fragment | NA    | 0     |
| S12_k141_102048                                | 1134  | No  | NA | 0    | 1 | Not-determined | Genome-fragment | NA    | 0     |
| S12_k141_352918                                | 1451  | No  | NA | 0    | 1 | Not-determined | Genome-fragment | NA    | 0     |
| S12_k141_35450                                 | 1502  | No  | NA | 0    | 2 | Not-determined | Genome-fragment | NA    | 0     |
| S12_k141_269439                                | 5518  | No  | NA | 0    | 2 | Not-determined | Genome-fragment | NA    | 0     |
| S3-final-viral-combined_k141_993771[full]      | 3256  | No  | NA | 0    | 1 | Low-quality    | Genome-fragment | NA    | 5.44  |
| S12_k141_35453                                 | 1513  | No  | NA | 0    | 1 | Not-determined | Genome-fragment | NA    | 0     |
| S12_k141_102071                                | 1054  | No  | NA | 0    | 0 | Not-determined | Genome-fragment | NA    | 0     |
| S12_k141_252746                                | 1122  | No  | NA | 0    | 2 | Not-determined | Genome-fragment | NA    | 0     |
| S12_k141_152304                                | 3817  | No  | NA | 0    | 0 | Not-determined | Genome-fragment | NA    | 0     |
| S12_k141_386795                                | 1193  | No  | NA | 0    | 1 | Not-determined | Genome-fragment | NA    | 0     |
| S17-final-viral-combined_k141_358461[full]     | 3256  | No  | NA | 0    | 2 | Low-quality    | Genome-fragment | NA    | 7.89  |
| S12_k141_68615                                 | 3850  | No  | NA | 0    | 2 | Not-determined | Genome-fragment | NA    | 0     |
| S12_k141_316176                                | 1013  | No  | NA | 0    | 0 | Not-determined | Genome-fragment | NA    | 0     |
| S12_k141_236192                                | 1275  | No  | NA | 0    | 1 | Not-determined | Genome-fragment | NA    | 0     |
| S2_k141_54886                                  | 3256  | No  | NA | 0    | 1 | Low-quality    | Genome-fragment | NA    | 7.37  |
| S12_k141_118532                                | 6869  | No  | NA | 0    | 4 | Not-determined | Genome-fragment | NA    | 0     |
| S12_k141_303254                                | 1035  | No  | NA | 0    | 0 | Not-determined | Genome-fragment | NA    | 0     |
| S12_k141_303262                                | 1305  | No  | NA | 0    | 0 | Not-determined | Genome-fragment | NA    | 0     |
| S12_k141_386860                                | 1105  | No  | NA | 0    | 1 | Not-determined | Genome-fragment | NA    | 0     |
| S12_k141_169151                                | 1536  | No  | NA | 0    | 1 | Not-determined | Genome-fragment | NA    | 0     |
| S1-final-viral-combined_k141_916871[full]      | 3257  | No  | NA | 0    | 1 | Low-quality    | Genome-fragment | NA    | 7.28  |
| S12_k141_219390                                | 1122  | No  | NA | 0    | 1 | Not-determined | Genome-fragment | NA    | 0     |
| S12_k141_286577                                | 3361  | No  | NA | 0    | 1 | Not-determined | Genome-fragment | NA    | 0     |
| S12_k141_303333                                | 2732  | No  | NA | 0    | 2 | Not-determined | Genome-fragment | NA    | 0     |
| S12_k141_303341                                | 3120  | No  | NA | 0    | 1 | Not-determined | Genome-fragment | NA    | 0     |
| S12_k141_202461                                | 1600  | No  | NA | 0    | 1 | Not-determined | Genome-fragment | NA    | 0     |
| S4_k141_96371                                  | 3257  | No  | NA | 2    | 0 | Low-quality    | Genome-fragment | NA    | 3.31  |
| S12_k141_286599                                | 1817  | No  | NA | 0    | 1 | Not-determined | Genome-fragment | NA    | 0     |
| S12_k141_86668                                 | 1615  | No  | NA | 0    | 0 | Not-determined | Genome-fragment | NA    | 0     |
| S12_k141_85353                                 | 1374  | No  | NA | 0    | 1 | Not-determined | Genome-fragment | NA    | 0     |
| S12_k141_319984                                | 1037  | No  | NA | 0    | 0 | Not-determined | Genome-fragment | NA    | 0     |
| S9_k141_51203                                  | 3258  | No  | NA | 0    | 1 | Low-quality    | Genome-fragment | NA    | 0.86  |
| S12_k141_336229                                | 1247  | No  | NA | 0    | 0 | Not-determined | Genome-fragment | NA    | 0     |
| S12_k141_303370                                | 10384 | No  | NA | 0    | 2 | Not-determined | Genome-fragment | NA    | 0     |
| S12_k141_319993                                | 3329  | No  | NA | 0    | 2 | Not-determined | Genome-fragment | NA    | 0     |
| S12_k141_68746                                 | 1466  | No  | NA | 0    | 1 | Not-determined | Genome-fragment | NA    | 0     |
| S12_k141_386949                                | 1222  | No  | NA | 0    | 1 | Not-determined | Genome-fragment | NA    | 0     |
| S11_k141_245860                                | 3258  | Yes | NA | 2620 | 1 | Low-quality    | Genome-fragment | NA    | 5.66  |
| S12_k141_169086                                | 2093  | No  | NA | 0    | 1 | Not-determined | Genome-fragment | NA    | 19.58 |
| S12_k141_353127                                | 1612  | No  | NA | 0    | 1 | Not-determined | Genome-fragment | NA    | 0     |
| S12_k141_85599                                 | 1044  | No  | NA | 0    | 0 | Not-determined | Genome-fragment | NA    | 0     |
| S12_k141_85609                                 | 1107  | No  | NA | 0    | 1 | Not-determined | Genome-fragment | NA    | 0     |
| S1-final-viral-combined_k141_244921[full]      | 3258  | No  | NA | 0    | 1 | Low-quality    | Genome-fragment | NA    | 7.1   |
| S7-final-viral-combined_k141_2173921[R2genome] | 3258  | No  | NA | 1    | 0 | Low-quality    | Genome-fragment | NA    | 5.94  |
| S12_k141_320059                                | 3095  | No  | NA | 0    | 3 | Not-determined | Genome-fragment | NA    | 0     |
| S12_k141_310061                                | 1252  | No  | NA | 0    | 0 | Not-determined | Genome-fragment | NA    | 0     |
| S12_k141_303436                                | 1146  | No  | NA | 0    | 0 | Not-determined | Genome-fragment | NA    | 0     |
| S12_k141_85641                                 | 1559  | No  | NA | 0    | 1 | Not-determined | Genome-fragment | NA    | 0     |
| S3-final-viral-combined_k141_2347431[full]     | 3258  | No  | NA | 0    | 0 | Low-quality    | Genome-fragment | NA    | 6.09  |
| S8-final-viral-combined_k141_612391[full]      | 3259  | No  | NA | 1    | 0 | Low-quality    | Genome-fragment | NA    | 2.06  |
| S12_k141_370389                                | 3273  | No  | NA | 0    | 0 | Not-determined | Genome-fragment | NA    | 0     |
| S12_k141_35709                                 | 2127  | No  | NA | 0    | 0 | Not-determined | Genome-fragment | NA    | 0     |
| S12_k141_269572                                | 1016  | No  | NA | 0    | 1 | Not-determined | Genome-fragment | NA    | 0     |
| S12_k141_68832                                 | 4316  | No  | NA | 0    | 1 | Not-determined | Genome-fragment | NA    | 0     |
| S12_k141_202596                                | 1219  | No  | NA | 0    | 0 | Not-determined | Genome-fragment | NA    | 0     |
| S3-final-viral-combined_k141_415751[full]      | 3260  | No  | NA | 0    | 0 | Low-quality    | Genome-fragment | NA    | 7.56  |
| S12_k141_353256                                | 1002  | No  | NA | 0    | 0 | Not-determined | Genome-fragment | NA    | 0     |
| S12_k141_169266                                | 1113  | No  | NA | 0    | 0 | Not-determined | Genome-fragment | NA    | 0     |
| S12_k141_2181                                  | 3914  | No  | NA | 0    | 1 | Not-determined | Genome-fragment | NA    | 0     |
| S5_k141_8711                                   | 3260  | No  | NA | 0    | 1 | Low-quality    | Genome-fragment | NA    | 5.45  |
| S12_k141_286743                                | 3905  | No  | NA | 0    | 1 | Not-determined | Genome-fragment | NA    | 0     |
| S12_k141_102300                                | 1156  | No  | NA | 0    | 1 | Not-determined | Genome-fragment | NA    | 0     |
| S2-final-viral-combined_k141_1980481[full]     | 3260  | No  | NA | 0    | 1 | Low-quality    | Genome-fragment | NA    | 4.2   |
| S17-final-viral-combined_k141_6161251[full]    | 3261  | No  | NA | 0    | 1 | Low-quality    | Genome-fragment | NA    | 3.96  |
| S12_k141_169364                                | 1046  | No  | NA | 0    | 0 | Not-determined | Genome-fragment | NA    | 0     |
| S12_k141_2128                                  | 3805  | No  | NA | 0    | 2 | Not-determined | Genome-fragment | NA    | 0     |
| S12_k141_387147                                | 4127  | No  | NA | 0    | 0 | Not-determined | Genome-fragment | NA    | 0     |
| S12_k141_286813                                | 1017  | No  | NA | 0    | 1 | Not-determined | Genome-fragment | NA    | 0     |
| S12_k141_269758                                | 3463  | No  | NA | 0    | 3 | Not-determined | Genome-fragment | NA    | 0     |
| S12_k141_253013                                | 3205  | No  | NA | 0    | 3 | Not-determined | Genome-fragment | NA    | 0     |
| S12_k141_102346                                | 1108  | No  | NA | 0    | 0 | Not-determined | Genome-fragment | NA    | 0     |
| S12_k141_88978                                 | 2782  | No  | NA | 0    | 2 | Not-determined | Genome-fragment | NA    | 0     |
| S12_k141_209762                                | 8317  | No  | NA | 0    | 1 | Not-determined | Genome-fragment | NA    | 0     |
| S12_k141_118958                                | 1700  | No  | NA | 0    | 1 | Not-determined | Genome-fragment | NA    | 0     |
| S12_k141_303635                                | 1547  | No  | NA | 0    | 1 | Not-determined | Genome-fragment | NA    | 0     |
| S12-final-viral-combined_k141_1366361[full]    | 3261  | No  | NA | 0    | 0 | Low-quality    | Genome-fragment | NA    | 3.53  |
| S12_k141_387194                                | 1882  | No  | NA | 0    | 0 | Not-determined | Genome-fragment | NA    | 0     |
| S12_k141_2308                                  | 4153  | No  | NA | 0    | 3 | Not-determined | Genome-fragment | NA    | 0     |
| S12_k141_186413                                | 1070  | No  | NA | 0    | 1 | Not-determined | Genome-fragment | NA    | 0     |
| S12_k141_364927                                | 3261  | No  | NA | 1    | 0 | Low-quality    | Genome-fragment | NA    | 5.81  |
| S2_k141_129766                                 | 3261  | No  | NA | 0    | 1 | Low-quality    | Genome-fragment | NA    | 2.99  |
| S12_k141_2318                                  | 1064  | No  | NA | 0    | 0 | Not-determined | Genome-fragment | NA    | 0     |
| S11-final-viral-combined_k141_2109641[full]    | 3262  | No  | NA | 3    | 0 | Low-quality    | Genome-fragment | NA    | 2.64  |
| S12_k141_102429                                | 1911  | No  | NA | 0    | 0 | Not-determined | Genome-fragment | NA    | 0     |
| S12_k141_51423                                 | 1119  | No  | NA | 0    | 1 | Not-determined | Genome-fragment | NA    | 0     |
| S1-final-viral-combined_k141_786391[full]      | 3262  | No  | NA | 0    | 1 | Low-quality    | Genome-fragment | NA    | 7.47  |
| S12_k141_2338                                  | 1824  | No  | NA | 0    | 0 | Not-determined | Genome-fragment | NA    | 0     |
| S12_k141_236304                                | 5552  | No  | NA | 0    | 1 | Not-determined | Genome-fragment | NA    | 0     |
| S12_k141_119026                                | 1384  | No  | NA | 0    | 0 | Not-determined | Genome-fragment | NA    | 0     |
| S12_k141_320300                                | 3187  | No  | NA | 0    | 3 | Not-determined | Genome-fragment | NA    | 0     |
| S12_k141_202803                                | 42999 | No  | NA | 13   | 0 | High-quality   | High-quality    | 100   | 0     |
| S12_k141_269899                                | 2237  | No  | NA | 0    | 1 | Not-determined | Genome-fragment | NA    | 0     |
| S12_k141_2147                                  | 5073  | No  | NA | 0    | 2 | Not-determined | Genome-fragment | NA    | 0     |
| S12_k141_202816                                | 1061  | No  | NA | 0    | 0 | Not-determined | Genome-fragment | NA    | 0     |
| S12_k141_152893                                | 1134  | No  | NA | 0    | 1 | Not-determined | Genome-fragment | NA    | 0     |
| S12_k141_136023                                | 15739 | No  | NA | 0    | 1 | Not-determined | Genome-fragment | NA    | 0     |
| S12_k141_186537                                | 4379  | No  | NA | 0    | 4 | Not-determined | Genome-fragment | NA    | 0     |
| S12_k141_69163                                 | 1050  | No  | NA | 0    | 1 | Not-determined | Genome-fragment | NA    | 0     |
| S12_k141_206564                                | 4247  | No  | NA | 0    | 1 | Not-determined | Genome-fragment | NA    | 0     |
| S17-final-viral-combined_k141_2203111[full]    | 3262  | No  | NA | 2    | 0 | Low-quality    | Genome-fragment | NA    | 3.93  |
| S12_k141_269908                                | 14275 | No  | NA | 0    | 3 | Not-determined | Genome-fragment | NA    | 0     |
| S12_k141_51513                                 | 2244  | No  | NA | 0    | 1 | Not-determined | Genome-fragment | NA    | 0     |
| S9-final-viral-combined_k141_1068601[full]     | 3264  | No  | NA | 0    | 2 | Low-quality    | Genome-fragment | NA    | 1.13  |
| S5-final-viral-combined_k141_659631[full]      | 3264  | No  | NA | 0    | 1 | Low-quality    | Genome-fragment | NA    | 2.34  |
| S12_k141_353524                                | 1333  | No  | NA | 0    | 1 | Not-determined | Genome-fragment | NA    | 0     |
| S12_k141_310377                                | 1473  | No  | NA | 0    | 1 | Not-determined | Genome-fragment | NA    | 0     |
| S12_k141_85957                                 | 1318  | No  | NA | 0    | 1 | Not-determined | Genome-fragment | NA    | 0     |
| S12_k141_69210                                 | 3415  | No  | NA | 0    | 2 | Not-determined | Genome-fragment | NA    | 0     |
| S12-final-viral-combined_k141_2106051[full]    | 3264  | No  | NA | 3    | 0 | Low-quality    | Genome-fragment | NA    | 7.92  |
| S2_k141_85751                                  | 3264  | No  | NA | 2    | 0 | Low-quality    | Genome-fragment | NA    | 9.11  |
| S12_k141_36005                                 | 1057  | No  | NA | 0    | 1 | Not-determined | Genome-fragment | NA    | 0     |
| S12_k141_269978                                | 1614  | No  | NA | 0    | 1 | Not-determined | Genome-fragment | NA    | 0     |
| S12_k141_52580                                 | 3466  | No  | NA | 0    | 0 | Not-determined | Genome-fragment | NA    | 0     |
| S12_k141_253187                                | 1044  | No  | NA | 0    | 0 | Not-determined | Genome-fragment | NA    | 0     |
| S12_k141_136169                                | 4111  | No  | NA | 0    | 0 | Not-determined | Genome-fragment | NA    | 0     |
| S12_k141_320463                                | 1070  | No  | NA | 0    | 1 | Not-determined | Genome-fragment | NA    | 0     |
| S12_k141_51625                                 | 1555  | No  | NA | 0    | 2 | Not-determined | Genome-fragment | NA    | 0     |
| S4_k141_14780                                  | 3264  | No  | NA | 0    | 2 | Low-quality    | Genome-fragment | NA    | 1.36  |
| S11_k141_188008                                | 3265  | No  | NA | 2    | 0 | Low-quality    | Genome-fragment | NA    | 5.14  |
| S12_k141_387338                                |       |     |    |      |   |                |                 |       |       |



|                                              |       |     |      |    |    |                |                 |       |       |
|----------------------------------------------|-------|-----|------|----|----|----------------|-----------------|-------|-------|
| S12_k141_304118                              | 1042  | No  | NA   | 0  | 1  | Not-determined | Genome-fragment | NA    | 0     |
| S8-final-viral-combined_k141_65280  full     | 3269  | No  | NA   | 0  | 1  | Low-quality    | Genome-fragment | 1.64  | 0     |
| S12_k141_203168                              | 1455  | No  | NA   | 0  | 1  | Not-determined | Genome-fragment | NA    | 0     |
| S12_k141_353879                              | 1292  | No  | NA   | 0  | 1  | Not-determined | Genome-fragment | NA    | 0     |
| S12_k141_387517                              | 1654  | No  | NA   | 0  | 1  | Not-determined | Genome-fragment | NA    | 0     |
| S12_k141_86190                               | 1086  | No  | NA   | 0  | 1  | Not-determined | Genome-fragment | NA    | 0     |
| S12_k141_387558                              | 2315  | No  | NA   | 0  | 0  | Not-determined | Genome-fragment | NA    | 0     |
| S11-final-viral-combined_k141_245152  full   | 3270  | No  | NA   | 1  | 0  | Low-quality    | Genome-fragment | 7.24  | 0     |
| S12_k141_86208                               | 1129  | No  | NA   | 0  | 0  | Not-determined | Genome-fragment | NA    | 0     |
| S12_k141_387572                              | 1443  | No  | NA   | 0  | 2  | Not-determined | Genome-fragment | NA    | 0     |
| S12_k141_119302                              | 1577  | No  | NA   | 0  | 0  | Not-determined | Genome-fragment | NA    | 0     |
| S5-final-viral-combined_k141_148491  full    | 3270  | No  | NA   | 3  | 0  | Low-quality    | Genome-fragment | 5.06  | 0     |
| S11-final-viral-combined_k141_10611  full    | 3271  | No  | NA   | 0  | 1  | Low-quality    | Genome-fragment | 1.73  | 0     |
| S12_k141_253414                              | 3463  | No  | NA   | 0  | 2  | Not-determined | Genome-fragment | NA    | 0     |
| S12_k141_09736                               | 1522  | No  | NA   | 0  | 1  | Not-determined | Genome-fragment | NA    | 0     |
| S12_k141_153395                              | 1423  | No  | NA   | 0  | 1  | Not-determined | Genome-fragment | NA    | 0     |
| S12_k141_69808                               | 1223  | No  | NA   | 0  | 1  | Not-determined | Genome-fragment | NA    | 0     |
| S12_k141_86284                               | 2100  | No  | NA   | 0  | 1  | Not-determined | Genome-fragment | NA    | 0     |
| S12-final-viral-combined_k141_86967  full    | 3271  | No  | NA   | 1  | 0  | Low-quality    | Genome-fragment | 6.99  | 0     |
| S12_k141_169960                              | 3841  | No  | NA   | 0  | 2  | Not-determined | Genome-fragment | NA    | 0     |
| S12_k141_2741                                | 1373  | No  | NA   | 0  | 1  | Not-determined | Genome-fragment | NA    | 0     |
| S12_k141_207372                              | 1404  | No  | NA   | 0  | 0  | Not-determined | Genome-fragment | NA    | 0     |
| S12_k141_354100                              | 1660  | No  | NA   | 0  | 0  | Not-determined | Genome-fragment | NA    | 0     |
| S12_k141_287385                              | 1103  | No  | NA   | 0  | 1  | Not-determined | Genome-fragment | NA    | 0     |
| S7_k141_111589                               | 3273  | No  | NA   | 0  | 0  | Low-quality    | Genome-fragment | 4.98  | 0     |
| S17-final-viral-combined_k141_17823  full    | 3274  | No  | NA   | 3  | 0  | Low-quality    | Genome-fragment | 7.8   | 0     |
| S12_k141_270255                              | 1341  | No  | NA   | 0  | 1  | Not-determined | Genome-fragment | NA    | 0     |
| S12_k141_169990                              | 1280  | No  | NA   | 0  | 0  | Not-determined | Genome-fragment | NA    | 0     |
| S12_k141_219969                              | 1349  | No  | NA   | 0  | 1  | Not-determined | Genome-fragment | NA    | 0     |
| S12_k141_153441                              | 1163  | No  | NA   | 0  | 1  | Not-determined | Genome-fragment | NA    | 0     |
| S1-final-viral-combined_k141_178650  full    | 3275  | No  | NA   | 3  | 0  | Low-quality    | Genome-fragment | 7.05  | 0     |
| S12_k141_336780                              | 8997  | No  | NA   | 1  | 1  | Medium-quality | Genome-fragment | 50.86 | 0     |
| S12_k141_18935                               | 6895  | No  | NA   | 0  | 7  | Not-determined | Genome-fragment | NA    | 0     |
| S12_k141_371198                              | 1882  | No  | NA   | 0  | 0  | Not-determined | Genome-fragment | NA    | 0     |
| S12_k141_18966                               | 3397  | No  | NA   | 0  | 1  | Not-determined | Genome-fragment | NA    | 0     |
| S12_k141_102902                              | 1394  | No  | NA   | 0  | 0  | Not-determined | Genome-fragment | NA    | 0     |
| S12_k141_203415                              | 2314  | No  | NA   | 0  | 0  | Not-determined | Genome-fragment | NA    | 0     |
| S1_k141_145547                               | 3275  | No  | NA   | 0  | 1  | Low-quality    | Genome-fragment | 0.28  | 0     |
| S12_k141_191013                              | 1315  | No  | NA   | 0  | 0  | Not-determined | Genome-fragment | NA    | 0     |
| S12_k141_86396                               | 1028  | No  | NA   | 0  | 1  | Not-determined | Genome-fragment | NA    | 0     |
| S12_k141_119592                              | 1016  | No  | NA   | 0  | 0  | Not-determined | Genome-fragment | NA    | 0     |
| S12_k141_336871                              | 3604  | No  | NA   | 0  | 0  | Not-determined | Genome-fragment | NA    | 0     |
| S12_k141_320820                              | 1365  | No  | NA   | 0  | 0  | Not-determined | Genome-fragment | NA    | 0     |
| S4_k141_126707                               | 3275  | No  | NA   | 0  | 0  | Low-quality    | Genome-fragment | 3.92  | 0     |
| S12_k141_320835                              | 3097  | No  | NA   | 0  | 3  | Not-determined | Genome-fragment | NA    | 0     |
| S12_k141_116675                              | 1158  | No  | NA   | 0  | 2  | Not-determined | Genome-fragment | NA    | 0     |
| S17-final-viral-combined_k141_191307  full   | 3276  | No  | NA   | 0  | 0  | Low-quality    | Genome-fragment | 5.26  | 0     |
| S12_k141_220055                              | 1484  | No  | NA   | 0  | 0  | Not-determined | Genome-fragment | NA    | 0     |
| S12_k141_387766                              | 1958  | No  | NA   | 0  | 0  | Not-determined | Genome-fragment | NA    | 0     |
| S12-final-viral-combined_k141_153634  full   | 3276  | Yes | 2213 | 1  | 1  | Low-quality    | Genome-fragment | 2.82  | 32.45 |
| S4-final-viral-combined_k141_150442  full    | 3276  | No  | NA   | 0  | 0  | Low-quality    | Genome-fragment | 2.73  | 0     |
| S12_k141_270459                              | 11480 | No  | NA   | 12 | 0  | Not-determined | Genome-fragment | NA    | 0     |
| S12_k141_203568                              | 2236  | No  | NA   | 0  | 1  | Not-determined | Genome-fragment | NA    | 0     |
| S3-final-viral-combined_k141_44502  full     | 3277  | No  | NA   | 0  | 3  | Low-quality    | Genome-fragment | 8.55  | 0     |
| S12_k141_136746                              | 1128  | No  | NA   | 0  | 0  | Not-determined | Genome-fragment | NA    | 0     |
| S12_k141_186747                              | 3848  | No  | NA   | 0  | 4  | Not-determined | Genome-fragment | NA    | 0     |
| S8-final-viral-combined_k141_234686  full    | 3277  | No  | NA   | 0  | 2  | Low-quality    | Genome-fragment | 1.92  | 0     |
| S12_k141_2957                                | 1203  | No  | NA   | 0  | 1  | Not-determined | Genome-fragment | NA    | 0     |
| S9_k141_393101                               | 3278  | No  | NA   | 0  | 0  | Low-quality    | Genome-fragment | 3.43  | 0     |
| S11_k141_316883                              | 3279  | No  | NA   | 1  | 0  | Low-quality    | Genome-fragment | 2.43  | 0     |
| S1_k141_361083                               | 3279  | No  | NA   | 0  | 0  | Low-quality    | Genome-fragment | 5.42  | 0     |
| S12_k141_220139                              | 4356  | No  | NA   | 0  | 0  | Not-determined | Genome-fragment | NA    | 0     |
| S8-final-viral-combined_k141_67818  full     | 3279  | No  | NA   | 0  | 2  | Low-quality    | Genome-fragment | 2.22  | 0     |
| S9_k141_100169                               | 3280  | No  | NA   | 4  | 0  | Low-quality    | Genome-fragment | 6.86  | 0     |
| S11-final-viral-combined_k141_128843  full   | 3280  | No  | NA   | 0  | 1  | Low-quality    | Genome-fragment | 4.22  | 0     |
| S12_k141_3004                                | 1003  | No  | NA   | 0  | 1  | Not-determined | Genome-fragment | NA    | 0     |
| S12_k141_136811                              | 1333  | No  | NA   | 0  | 0  | Not-determined | Genome-fragment | NA    | 0     |
| S12_k141_19145                               | 1743  | No  | NA   | 0  | 1  | Not-determined | Genome-fragment | NA    | 0     |
| S12_k141_3017                                | 2867  | No  | NA   | 0  | 0  | Not-determined | Genome-fragment | NA    | 0     |
| S12_k141_531106                              | 6859  | No  | NA   | 0  | 4  | Not-determined | Genome-fragment | NA    | 0     |
| S12_k141_320896                              | 3914  | No  | NA   | 0  | 1  | Not-determined | Genome-fragment | NA    | 0     |
| S12_k141_310898                              | 6416  | No  | NA   | 0  | 1  | Not-determined | Genome-fragment | NA    | 0     |
| S12_k141_320908                              | 1009  | No  | NA   | 0  | 0  | Not-determined | Genome-fragment | NA    | 0     |
| S12_k141_187329                              | 1707  | No  | NA   | 0  | 1  | Not-determined | Genome-fragment | NA    | 0     |
| S12_k141_220234                              | 1034  | No  | NA   | 0  | 1  | Not-determined | Genome-fragment | NA    | 0     |
| S12_k141_287611                              | 3648  | No  | NA   | 0  | 4  | Not-determined | Genome-fragment | NA    | 0     |
| S12_k141_86573                               | 3808  | No  | NA   | 0  | 3  | Not-determined | Genome-fragment | NA    | 0     |
| S12_k141_119816                              | 2882  | No  | NA   | 0  | 7  | Not-determined | Genome-fragment | NA    | 0     |
| S12-final-viral-combined_k141_329347  H2gene | 3280  | No  | NA   | 0  | 0  | Low-quality    | Genome-fragment | 7.12  | 0     |
| S12-final-viral-combined_k141_179048  H2gene | 3280  | No  | NA   | 1  | 2  | Low-quality    | Genome-fragment | 4.49  | 0     |
| S12_k141_289003                              | 3280  | No  | NA   | 0  | 0  | Low-quality    | Genome-fragment | 1.26  | 0     |
| S9_k141_116108                               | 3282  | No  | NA   | 0  | 2  | Low-quality    | Genome-fragment | 2.93  | 0     |
| S11-final-viral-combined_k141_191476  full   | 3282  | No  | NA   | 2  | 0  | Low-quality    | Genome-fragment | 7.55  | 0     |
| S12_k141_270631                              | 5979  | No  | NA   | 0  | 1  | Not-determined | Genome-fragment | NA    | 0     |
| S5-final-viral-combined_k141_182535  full    | 3282  | No  | NA   | 1  | 0  | Low-quality    | Genome-fragment | 7.21  | 0     |
| S12_k141_19262                               | 1178  | No  | NA   | 0  | 2  | Not-determined | Genome-fragment | NA    | 0     |
| S12_k141_187393                              | 1451  | No  | NA   | 0  | 1  | Not-determined | Genome-fragment | NA    | 0     |
| S1-final-viral-combined_k141_41504  full     | 3283  | No  | NA   | 0  | 0  | Low-quality    | Genome-fragment | 5.27  | 0     |
| S2-final-viral-combined_k141_197567  full    | 3283  | No  | NA   | 0  | 0  | Low-quality    | Genome-fragment | 5.89  | 0     |
| S12_k141_3082                                | 1189  | No  | NA   | 0  | 1  | Not-determined | Genome-fragment | NA    | 0     |
| S2-final-viral-combined_k141_96323  full     | 3283  | No  | NA   | 0  | 1  | Low-quality    | Genome-fragment | 5.82  | 0     |
| S7-final-viral-combined_k141_226147  full    | 3284  | No  | NA   | 0  | 1  | Low-quality    | Genome-fragment | 4.17  | 0     |
| S12_k141_371470                              | 1058  | No  | NA   | 0  | 0  | Not-determined | Genome-fragment | NA    | 0     |
| S4_k141_151366                               | 3284  | No  | NA   | 0  | 0  | Low-quality    | Genome-fragment | 6.33  | 0     |
| S12_k141_156968                              | 5179  | No  | NA   | 0  | 0  | Not-determined | Genome-fragment | NA    | 0     |
| S12_k141_270687                              | 1512  | No  | NA   | 0  | 0  | Not-determined | Genome-fragment | NA    | 0     |
| S12_k141_86661                               | 4868  | No  | NA   | 0  | 1  | Not-determined | Genome-fragment | NA    | 0     |
| S11-final-viral-combined_k141_151801  full   | 3286  | No  | NA   | 1  | 0  | Low-quality    | Genome-fragment | 6.1   | 0     |
| S12_k141_3122                                | 6689  | No  | NA   | 0  | 2  | Not-determined | Genome-fragment | NA    | 0     |
| S12_k141_320982                              | 5071  | No  | NA   | 0  | 3  | Not-determined | Genome-fragment | NA    | 0     |
| S12_k141_70277                               | 3427  | No  | NA   | 0  | 0  | Not-determined | Genome-fragment | NA    | 0     |
| S12_k141_354271                              | 3650  | No  | NA   | 0  | 0  | Not-determined | Genome-fragment | NA    | 0     |
| S12_k141_304658                              | 1030  | No  | NA   | 0  | 2  | Not-determined | Genome-fragment | NA    | 0     |
| S12_k141_314460                              | 3286  | No  | NA   | 0  | 2  | Low-quality    | Genome-fragment | 1.56  | 0     |
| S12_k141_171713                              | 2287  | No  | NA   | 0  | 2  | Low-quality    | Genome-fragment | 1.84  | 0     |
| S12-final-viral-combined_k141_259553  full   | 3288  | No  | NA   | 3  | 0  | Low-quality    | Genome-fragment | 8.34  | 0     |
| S12_k141_337286                              | 2117  | No  | NA   | 0  | 0  | Not-determined | Genome-fragment | NA    | 0     |
| S12_k141_270809                              | 2884  | No  | NA   | 0  | 0  | Not-determined | Genome-fragment | NA    | 0     |
| S12-final-viral-combined_k141_307256  full   | 2389  | No  | NA   | 0  | 0  | Low-quality    | Genome-fragment | 4.5   | 0     |
| S12_k141_203884                              | 1118  | No  | NA   | 0  | 1  | Not-determined | Genome-fragment | NA    | 0     |
| S11-final-viral-combined_k141_11547  full    | 3290  | No  | NA   | 1  | 0  | Low-quality    | Genome-fragment | 3.08  | 0     |
| S1-final-viral-combined_k141_77878  full     | 3290  | No  | NA   | 0  | 0  | Low-quality    | Genome-fragment | 10.91 | 0     |
| S12_k141_170558                              | 1024  | No  | NA   | 0  | 1  | Not-determined | Genome-fragment | NA    | 0     |
| S12_k141_304707                              | 1049  | No  | NA   | 0  | 0  | Not-determined | Genome-fragment | NA    | 0     |
| S12_k141_19441                               | 1157  | No  | NA   | 0  | 2  | Not-determined | Genome-fragment | NA    | 0     |
| S12_k141_253768                              | 1338  | No  | NA   | 0  | 0  | Not-determined | Genome-fragment | NA    | 0     |
| S12_k141_321084                              | 1414  | No  | NA   | 0  | 1  | Not-determined | Genome-fragment | NA    | 0     |
| S12_k141_321096                              | 1217  | No  | NA   | 0  | 1  | Not-determined | Genome-fragment | NA    | 0     |
| S12_k141_371612                              | 1186  | No  | NA   | 0  | 0  | Not-determined | Genome-fragment | NA    | 0     |
| S12_k141_371614                              | 1275  | No  | NA   | 0  | 1  | Not-determined | Genome-fragment | NA    | 0     |
| S12_k141_371616                              | 1353  | No  | NA   | 0  | 1  | Not-determined | Genome-fragment | NA    | 0     |
| S12_k141_137140                              | 3674  | No  | NA   | 0  | 3  | Not-determined | Genome-fragment | NA    | 0     |
| S1-final-viral-combined_k141_49100  full     | 3290  | Yes | 1891 | 2  | 1  | Low-quality    | Genome-fragment | 4.03  | 42.52 |
| S12_k141_388119                              | 9342  | No  | NA   | 0  | 19 | Not-determined | Genome-fragment | NA    | 0     |
| S12-final-viral-combined_k141_224104  full   | 3290  | No  | NA   | 0  | 0  | Low-quality    | Genome-fragment | 8.62  | 0     |
| S12_k141_354447                              | 5457  | No  | NA   | 0  | 2  | Not-determined | Genome-fragment | NA    | 0     |
| S12_k141_187647                              | 3570  | No  | NA   | 0  | 2  | Not-determined | Genome-fragment | NA    | 0     |
| S2_k141_138271                               | 3290  | No  | NA   | 1  | 0  | Low-quality    | Genome-fragment | 1.73  | 0     |
| S8_k141_21669                                | 3290  | No  | NA   | 0  | 0  | Low-quality    | Genome-fragment | 4.86  | 0     |
| S1-final-viral-combined_k141_352634  full    | 3291  | No  | NA   | 3  | 0  | Low-quality    | Genome-fragment | 11.47 | 0     |
| S5-final-viral-combined_k141_144576  full    | 3291  | No  | NA   | 0  | 0  | Low-quality    | Genome-fragment | 7.78  | 0     |
| S12_k141_321194                              | 1149  | No  | NA   | 0  | 2  | Not-determined | Genome-fragment | NA    | 0     |
| S12_k141_321216                              | 4603  | No  | NA   | 0  | 1  | Not-determined | Genome-fragment | NA    | 0     |
| S12_k141_153892                              | 1205  | No  | NA   | 0  | 0  | Not-determined | Genome-fragment | NA    | 0     |
| S12_k141_253885                              | 1173  | No  | NA   | 0  | 2  | Not-determined | Genome-fragment | NA    | 0     |
| S5_k141_59078                                | 3291  | No  | NA   | 0  | 2  | Low-quality    | Genome-fragment | 5.04  | 0     |
| S7-final-viral-combined_k141_153353  full    | 3291  | No  | NA   | 1  | 0  | Low-quality    | Genome-fragment | 6.28  | 0     |
| S1_k141_229783                               | 3292  | No  | NA   | 0  | 1  | Low-quality    | Genome-fragment | 4.34  | 0     |
| S12_k141_304889                              | 3750  | No  | NA   | 0  | 0  | Not-determined | Genome-fragment | NA    | 0     |
| S12_k141_253903                              | 1627  | No  | NA   | 0  | 1  | Not-determined | Genome-fragment | NA    | 0     |
| S17-final-viral-combined_k141_173472  full   | 3292  | No  | NA   | 1  | 0  | Low-quality    | Genome-fragment | 8.69  | 0     |
| S12_k141_270903                              | 2755  | No  | NA   | 0  | 2  | Not-determined | Genome-fragment | NA    | 0     |
| S12_k141_103422                              | 4827  | No  | NA   | 0  | 8  | Not-determined | Genome-fragment | NA    | 0     |
| S12_k141_204119                              | 48    |     |      |    |    |                |                 |       |       |



|                                            |       |     |      |   |   |                |                 |       |       |
|--------------------------------------------|-------|-----|------|---|---|----------------|-----------------|-------|-------|
| S12_k141_270979                            | 1225  | No  | NA   | 0 | 0 | Not-determined | Genome-fragment | NA    | 0     |
| S12_k141_131751                            | 1316  | No  | NA   | 0 | 1 | Not-determined | Genome-fragment | NA    | 0     |
| S12_k141_37095                             | 11686 | No  | NA   | 0 | 4 | Not-determined | Genome-fragment | NA    | 0     |
| S5_k141_167355                             | 3294  | No  | NA   | 0 | 3 | Low-quality    | Genome-fragment | 1.06  | 0     |
| S12_k141_70762                             | 3050  | No  | NA   | 0 | 1 | Not-determined | Genome-fragment | NA    | 0     |
| S12_k141_37126                             | 1646  | No  | NA   | 0 | 0 | Not-determined | Genome-fragment | NA    | 0     |
| S12_k141_53561                             | 1280  | No  | NA   | 0 | 0 | Not-determined | Genome-fragment | NA    | 0     |
| S12_k141_35599                             | 1232  | No  | NA   | 0 | 1 | Not-determined | Genome-fragment | NA    | 0     |
| S12_k141_37172                             | 1536  | No  | NA   | 0 | 1 | Not-determined | Genome-fragment | NA    | 0     |
| S12_k141_288235                            | 1421  | No  | NA   | 0 | 0 | Not-determined | Genome-fragment | NA    | 0     |
| S6-final-viral-combined_k141_42017  full   | 3294  | No  | NA   | 0 | 3 | Low-quality    | Genome-fragment | 1.59  | 0     |
| S12_k141_282827                            | 4268  | No  | NA   | 0 | 1 | Not-determined | Genome-fragment | NA    | 0     |
| S12_k141_103708                            | 2083  | No  | NA   | 0 | 0 | Not-determined | Genome-fragment | NA    | 0     |
| S12_k141_271034                            | 2926  | No  | NA   | 0 | 2 | Not-determined | Genome-fragment | NA    | 0     |
| S12_k141_3653                              | 1095  | No  | NA   | 0 | 0 | Not-determined | Genome-fragment | NA    | 0     |
| S12_k141_217753                            | 1478  | No  | NA   | 0 | 2 | Not-determined | Genome-fragment | NA    | 0     |
| S12_k141_137441                            | 5079  | No  | NA   | 0 | 3 | Not-determined | Genome-fragment | NA    | 0     |
| S12_k141_70854                             | 3133  | No  | NA   | 0 | 1 | Not-determined | Genome-fragment | NA    | 0     |
| S12_k141_321528                            | 1072  | No  | NA   | 0 | 1 | Not-determined | Genome-fragment | NA    | 0     |
| S12_k141_3687                              | 1469  | No  | NA   | 0 | 0 | Not-determined | Genome-fragment | NA    | 0     |
| S12_k141_271078                            | 3467  | No  | NA   | 0 | 1 | Not-determined | Genome-fragment | NA    | 0     |
| S12_k141_120170                            | 2156  | No  | NA   | 0 | 0 | Not-determined | Genome-fragment | NA    | 0     |
| S3_k141_29974                              | 3295  | No  | NA   | 0 | 1 | Low-quality    | Genome-fragment | 5.44  | 0     |
| S7-final-viral-combined_k141_108004  full  | 3295  | No  | NA   | 2 | 0 | Low-quality    | Genome-fragment | 7.25  | 0     |
| S12_k141_3703                              | 6804  | No  | NA   | 0 | 2 | Not-determined | Genome-fragment | NA    | 0     |
| S12_k141_220858                            | 1551  | No  | NA   | 0 | 0 | Not-determined | Genome-fragment | NA    | 0     |
| S12_k141_20061                             | 1084  | No  | NA   | 0 | 0 | Not-determined | Genome-fragment | NA    | 0     |
| S17-final-viral-combined_k141_83307  full  | 3295  | No  | NA   | 1 | 0 | Low-quality    | Genome-fragment | 2.1   | 0     |
| S12_k141_305218                            | 5153  | No  | NA   | 0 | 1 | Not-determined | Genome-fragment | NA    | 0     |
| S12_k141_120223                            | 1155  | No  | NA   | 0 | 3 | Not-determined | Genome-fragment | NA    | 0     |
| S4-final-viral-combined_k141_14212  full   | 3295  | No  | NA   | 0 | 3 | Low-quality    | Genome-fragment | 2.31  | 0     |
| S5-final-viral-combined_k141_160778  full  | 2297  | Yes | 700  | 0 | 2 | Low-quality    | Genome-fragment | 0.53  | 78.77 |
| S12_k141_288366                            | 1025  | No  | NA   | 0 | 0 | Not-determined | Genome-fragment | NA    | 0     |
| S7-final-viral-combined_k141_179564  full  | 3298  | No  | NA   | 0 | 0 | Low-quality    | Genome-fragment | 8.43  | 0     |
| S12_k141_372034                            | 1479  | No  | NA   | 0 | 2 | Not-determined | Genome-fragment | NA    | 0     |
| S12_k141_120917                            | 1492  | No  | NA   | 0 | 1 | Not-determined | Genome-fragment | NA    | 0     |
| S12_k141_137532                            | 4106  | No  | NA   | 0 | 1 | Not-determined | Genome-fragment | NA    | 0     |
| S12_k141_3764                              | 2375  | No  | NA   | 0 | 2 | Not-determined | Genome-fragment | NA    | 0     |
| S12_k141_67773                             | 3298  | No  | NA   | 0 | 1 | Low-quality    | Genome-fragment | 3.83  | 0     |
| S12_k141_37281                             | 3113  | No  | NA   | 0 | 2 | Not-determined | Genome-fragment | NA    | 0     |
| S2-final-viral-combined_k141_90952  full   | 3298  | Yes | 2720 | 2 | 1 | Low-quality    | Genome-fragment | 4.21  | 17.53 |
| S12_k141_254232                            | 2194  | No  | NA   | 0 | 0 | Not-determined | Genome-fragment | NA    | 0     |
| S8_k141_203434                             | 3298  | No  | NA   | 0 | 1 | Low-quality    | Genome-fragment | 6.09  | 0     |
| S12_k141_271183                            | 1009  | No  | NA   | 0 | 0 | Not-determined | Genome-fragment | NA    | 0     |
| S12_k141_337922                            | 2640  | No  | NA   | 0 | 0 | Not-determined | Genome-fragment | NA    | 0     |
| S12_k141_288468                            | 1062  | No  | NA   | 0 | 2 | Not-determined | Genome-fragment | NA    | 0     |
| S12_k141_271203                            | 1160  | No  | NA   | 0 | 2 | Not-determined | Genome-fragment | NA    | 0     |
| S12_k141_103844                            | 1735  | No  | NA   | 0 | 0 | Not-determined | Genome-fragment | NA    | 0     |
| S12-final-viral-combined_k141_243477  full | 3299  | No  | NA   | 0 | 0 | Low-quality    | Genome-fragment | 2.37  | 0     |
| S12_k141_271242                            | 1124  | No  | NA   | 0 | 0 | Not-determined | Genome-fragment | NA    | 0     |
| S12_k141_237945                            | 1168  | No  | NA   | 0 | 2 | Not-determined | Genome-fragment | NA    | 0     |
| S12_k141_386898                            | 4026  | No  | NA   | 0 | 3 | Not-determined | Genome-fragment | NA    | 0     |
| S11_k141_81322                             | 3300  | Yes | 2859 | 2 | 1 | Low-quality    | Genome-fragment | 5.01  | 13.36 |
| S12_k141_237952                            | 2233  | No  | NA   | 0 | 1 | Not-determined | Genome-fragment | NA    | 0     |
| S12_k141_305408                            | 1111  | No  | NA   | 0 | 0 | Not-determined | Genome-fragment | NA    | 0     |
| S12_k141_305411                            | 4486  | No  | NA   | 0 | 2 | Not-determined | Genome-fragment | NA    | 0     |
| S12_k141_221009                            | 1573  | No  | NA   | 0 | 0 | Not-determined | Genome-fragment | NA    | 0     |
| S12_k141_121096                            | 1934  | No  | NA   | 0 | 1 | Not-determined | Genome-fragment | NA    | 0     |
| S12_k141_305422                            | 1472  | No  | NA   | 0 | 1 | Not-determined | Genome-fragment | NA    | 0     |
| S17-final-viral-combined_k141_215974  full | 3300  | Yes | 3039 | 1 | 1 | Low-quality    | Genome-fragment | 3.41  | 7.91  |
| S12_k141_71013                             | 1184  | No  | NA   | 0 | 2 | Not-determined | Genome-fragment | NA    | 0     |
| S12_k141_1210317                           | 1317  | No  | NA   | 0 | 1 | Not-determined | Genome-fragment | NA    | 0     |
| S12_k141_271316                            | 3542  | No  | NA   | 0 | 3 | Not-determined | Genome-fragment | NA    | 0     |
| S12_k141_20320                             | 1198  | No  | NA   | 0 | 1 | Not-determined | Genome-fragment | NA    | 0     |
| S8-final-viral-combined_k141_85842  full   | 3300  | No  | NA   | 2 | 0 | Low-quality    | Genome-fragment | 7.82  | 0     |
| S12_k141_350656                            | 3301  | No  | NA   | 2 | 0 | Low-quality    | Genome-fragment | 10.08 | 0     |
| S1_k141_101175                             | 3302  | No  | NA   | 0 | 3 | Low-quality    | Genome-fragment | 2.62  | 0     |
| S12_k141_137729                            | 1573  | No  | NA   | 0 | 0 | Not-determined | Genome-fragment | NA    | 0     |
| S8-final-viral-combined_k141_273217  full  | 3302  | No  | NA   | 1 | 0 | Low-quality    | Genome-fragment | 4.41  | 0     |
| S11-final-viral-combined_k141_224508  full | 3303  | No  | NA   | 0 | 3 | Low-quality    | Genome-fragment | 1.53  | 0     |
| S12_k141_37402                             | 1009  | No  | NA   | 0 | 0 | Not-determined | Genome-fragment | NA    | 0     |
| S12_k141_51872                             | 1177  | No  | NA   | 0 | 0 | Not-determined | Genome-fragment | NA    | 0     |
| S12_k141_3893                              | 3229  | No  | NA   | 0 | 2 | Not-determined | Genome-fragment | NA    | 0     |
| S12_k141_53585                             | 1626  | No  | NA   | 0 | 0 | Not-determined | Genome-fragment | NA    | 0     |
| S12_k141_171074                            | 5287  | No  | NA   | 0 | 4 | Not-determined | Genome-fragment | NA    | 0     |
| S12_k141_171144                            | 2001  | No  | NA   | 0 | 0 | Not-determined | Genome-fragment | NA    | 0     |
| S12_k141_354958                            | 3035  | No  | NA   | 0 | 0 | Not-determined | Genome-fragment | NA    | 0     |
| S1-final-viral-combined_k141_291380  full  | 3303  | No  | NA   | 0 | 0 | Low-quality    | Genome-fragment | 7.19  | 0     |
| S12_k141_20417                             | 4678  | No  | NA   | 0 | 2 | Not-determined | Genome-fragment | NA    | 0     |
| S12_k141_221060                            | 1039  | No  | NA   | 0 | 2 | Not-determined | Genome-fragment | NA    | 0     |
| S12_k141_388860                            | 2241  | No  | NA   | 0 | 1 | Not-determined | Genome-fragment | NA    | 0     |
| S12_k141_372266                            | 1086  | No  | NA   | 0 | 2 | Not-determined | Genome-fragment | NA    | 0     |
| S12_k141_305533                            | 2698  | No  | NA   | 0 | 0 | Not-determined | Genome-fragment | NA    | 0     |
| S12_k141_355006                            | 1126  | No  | NA   | 0 | 2 | Not-determined | Genome-fragment | NA    | 0     |
| S9_k141_52027                              | 3304  | No  | NA   | 3 | 0 | Low-quality    | Genome-fragment | 5.79  | 0     |
| S12_k141_355013                            | 1246  | No  | NA   | 0 | 1 | Not-determined | Genome-fragment | NA    | 0     |
| S8-final-viral-combined_k141_45310  full   | 3304  | No  | NA   | 0 | 0 | Low-quality    | Genome-fragment | 5.62  | 0     |
| S12_k141_171207                            | 6471  | No  | NA   | 0 | 2 | Not-determined | Genome-fragment | NA    | 0     |
| S12_k141_254423                            | 1177  | No  | NA   | 0 | 0 | Not-determined | Genome-fragment | NA    | 0     |
| S8_k141_270783                             | 3304  | No  | NA   | 0 | 0 | Low-quality    | Genome-fragment | 6.6   | 0     |
| S12_k141_171230                            | 1109  | No  | NA   | 0 | 0 | Not-determined | Genome-fragment | NA    | 0     |
| S7-final-viral-combined_k141_184416  full  | 3305  | No  | NA   | 0 | 0 | Low-quality    | Genome-fragment | 4.01  | 0     |
| S12_k141_120476                            | 1180  | No  | NA   | 0 | 0 | Not-determined | Genome-fragment | NA    | 0     |
| S12_k141_120477                            | 1351  | No  | NA   | 0 | 0 | Not-determined | Genome-fragment | NA    | 0     |
| S12_k141_288596                            | 1265  | No  | NA   | 0 | 1 | Not-determined | Genome-fragment | NA    | 0     |
| S17-final-viral-combined_k141_90382  full  | 3305  | No  | NA   | 1 | 0 | Low-quality    | Genome-fragment | 5.88  | 0     |
| S12_k141_204588                            | 1338  | No  | NA   | 0 | 0 | Not-determined | Genome-fragment | NA    | 0     |
| S12_k141_20510                             | 1288  | No  | NA   | 0 | 1 | Not-determined | Genome-fragment | NA    | 0     |
| S12_k141_137885                            | 1133  | No  | NA   | 0 | 1 | Not-determined | Genome-fragment | NA    | 0     |
| S12_k141_71210                             | 1215  | No  | NA   | 0 | 1 | Not-determined | Genome-fragment | NA    | 0     |
| S12_k141_20532                             | 3301  | No  | NA   | 0 | 2 | Not-determined | Genome-fragment | NA    | 0     |
| S12_k141_137901                            | 1847  | No  | NA   | 0 | 0 | Not-determined | Genome-fragment | NA    | 0     |
| S12-final-viral-combined_k141_281370  full | 3305  | Yes | 630  | 1 | 2 | Low-quality    | Genome-fragment | 0.36  | 80.94 |
| S12_k141_20569                             | 1192  | No  | NA   | 0 | 1 | Not-determined | Genome-fragment | NA    | 0     |
| S12_k141_154511                            | 3511  | No  | NA   | 0 | 3 | Not-determined | Genome-fragment | NA    | 0     |
| S12_k141_188511                            | 1122  | No  | NA   | 0 | 1 | Not-determined | Genome-fragment | NA    | 0     |
| S12_k141_254504                            | 1521  | No  | NA   | 0 | 1 | Not-determined | Genome-fragment | NA    | 0     |
| S12_k141_3996                              | 1137  | No  | NA   | 0 | 0 | Not-determined | Genome-fragment | NA    | 0     |
| S12_k141_154555                            | 1258  | No  | NA   | 0 | 0 | Not-determined | Genome-fragment | NA    | 0     |
| S12_k141_254530                            | 1070  | No  | NA   | 0 | 0 | Not-determined | Genome-fragment | NA    | 0     |
| S12_k141_322089                            | 1104  | No  | NA   | 0 | 1 | Not-determined | Genome-fragment | NA    | 0     |
| S12_k141_271637                            | 1383  | No  | NA   | 0 | 1 | Not-determined | Genome-fragment | NA    | 0     |
| S12_k141_71295                             | 10829 | No  | NA   | 0 | 3 | Not-determined | Genome-fragment | NA    | 0     |
| S12_k141_1210636                           | 1097  | No  | NA   | 0 | 0 | Not-determined | Genome-fragment | NA    | 0     |
| S12_k141_104198                            | 2630  | No  | NA   | 0 | 0 | Not-determined | Genome-fragment | NA    | 0     |
| S12_k141_188576                            | 5969  | No  | NA   | 0 | 1 | Not-determined | Genome-fragment | NA    | 0     |
| S8-final-viral-combined_k141_106254  full  | 3305  | No  | NA   | 0 | 5 | Low-quality    | Genome-fragment | 1.23  | 0     |
| S12_k141_271691                            | 2559  | No  | NA   | 0 | 0 | Not-determined | Genome-fragment | NA    | 0     |
| S12_k141_171390                            | 4281  | No  | NA   | 0 | 2 | Not-determined | Genome-fragment | NA    | 0     |
| S12_k141_71362                             | 5716  | No  | NA   | 0 | 1 | Not-determined | Genome-fragment | NA    | 0     |
| S8-final-viral-combined_k141_19005  full   | 3306  | No  | NA   | 0 | 1 | Low-quality    | Genome-fragment | 5.31  | 0     |
| S12_k141_104223                            | 1766  | No  | NA   | 0 | 1 | Not-determined | Genome-fragment | NA    | 0     |
| S8-final-viral-combined_k141_161928  full  | 3306  | No  | NA   | 0 | 1 | Low-quality    | Genome-fragment | 1.64  | 0     |
| S12_k141_389023                            | 3713  | No  | NA   | 0 | 3 | Not-determined | Genome-fragment | NA    | 0     |
| S5-final-viral-combined_k141_210046  full  | 3308  | No  | NA   | 0 | 0 | Low-quality    | Genome-fragment | 7.4   | 0     |
| S12_k141_204755                            | 1149  | No  | NA   | 0 | 1 | Not-determined | Genome-fragment | NA    | 0     |
| S12_k141_204767                            | 1988  | No  | NA   | 0 | 1 | Not-determined | Genome-fragment | NA    | 0     |
| S12_k141_355173                            | 1338  | No  | NA   | 0 | 1 | Not-determined | Genome-fragment | NA    | 0     |
| S12_k141_254638                            | 1005  | No  | NA   | 0 | 0 | Not-determined | Genome-fragment | NA    | 0     |
| S12_k141_389079                            | 5066  | No  | NA   | 0 | 1 | Not-determined | Genome-fragment | NA    | 0     |
| S12_k141_305750                            | 1653  | No  | NA   | 0 | 0 | Not-determined | Genome-fragment | NA    | 0     |
| S12_k141_138115                            | 1845  | No  | NA   | 0 | 2 | Not-determined | Genome-fragment | NA    | 0     |
| S12-final-viral-combined_k141_68410  full  | 3308  | No  | NA   | 1 | 0 | Low-quality    | Genome-fragment | 2.02  | 0     |
| S12_k141_389107                            | 1280  | No  | NA   | 0 | 0 | Not-determined | Genome-fragment | NA    | 0     |
| S12-final-viral-combined_k141_373792  full | 3309  | No  | NA   | 0 | 0 | Low-quality    | Genome-fragment | 6.77  | 0     |
| S12_k141_288747                            | 1558  | No  | NA   | 0 | 0 | Not-determined | Genome-fragment | NA    | 0     |
| S12_k141_188741                            | 1359  | No  | NA   | 0 | 1 | Not-determined | Genome-fragment | NA    | 0     |
| S12_k141_305762                            | 1114  | No  | NA   | 0 | 2 | Not-determined | Genome-fragment | NA    | 0     |
| S12_k141_254711                            | 3695  | No  | NA   | 0 | 3 | Not-determined | Genome-fragment | NA    | 0     |
| S12_k141_71567                             | 7371  | No  | NA   | 0 | 0 | Not-determined | Genome-fragment | NA    | 0     |
| S12_k141_1210796                           | 4592  | No  | NA   | 0 | 1 | Not-determined | Genome-fragment | NA    | 0     |
| S12_k141_35764                             | 3309  | No  | NA   | 0 | 1 | Low-quality    | Genome-fragment | 1.96  | 0     |
| S12_k141_221513                            | 1524  | No  | NA   | 0 | 2 | Not-determined | Genome-fragment | NA    | 0     |
| S4_k141_127624                             | 3309  | No  | NA   | 0 | 0 | Low-quality    | Genome-fragment | 6.34  | 0     |
| S12_k141_221518                            | 2075  | No  | NA   |   |   |                |                 |       |       |



|                                             |       |     |      |   |   |                |                 |    |       |
|---------------------------------------------|-------|-----|------|---|---|----------------|-----------------|----|-------|
| S12_k141_54384                              | 3139  | No  | NA   | 0 | 1 | Not-determined | Genome-fragment | NA | 0     |
| S12_k141_4284                               | 3873  | No  | NA   | 0 | 1 | Not-determined | Genome-fragment | NA | 0     |
| S12_k141_288883                             | 2693  | No  | NA   | 0 | 0 | Not-determined | Genome-fragment | NA | 0     |
| S1-final-viral-combined_k141_139791[full]   | 3314  | No  | NA   | 1 | 0 | Low-quality    | Genome-fragment | NA | 6.74  |
| S12_k141_87806                              | 2410  | No  | NA   | 0 | 1 | Not-determined | Genome-fragment | NA | 0     |
| S5_k141_13143                               | 3314  | No  | NA   | 0 | 1 | Low-quality    | Genome-fragment | NA | 2.03  |
| S12_k141_37935                              | 5463  | No  | NA   | 0 | 0 | Not-determined | Genome-fragment | NA | 0     |
| S1_k141_53739                               | 3315  | No  | NA   | 0 | 0 | Low-quality    | Genome-fragment | NA | 7.86  |
| S12_k141_37950                              | 1312  | No  | NA   | 0 | 1 | Not-determined | Genome-fragment | NA | 0     |
| S12_k141_4299                               | 1240  | No  | NA   | 0 | 0 | Not-determined | Genome-fragment | NA | 0     |
| S12_k141_221821                             | 1216  | No  | NA   | 0 | 1 | Not-determined | Genome-fragment | NA | 0     |
| S12_k141_118453                             | 1159  | No  | NA   | 0 | 0 | Not-determined | Genome-fragment | NA | 0     |
| S12_k141_171531                             | 1674  | No  | NA   | 0 | 1 | Not-determined | Genome-fragment | NA | 0     |
| S12_k141_322554                             | 3563  | No  | NA   | 0 | 2 | Not-determined | Genome-fragment | NA | 0     |
| S9_k141_103955                              | 3316  | No  | NA   | 0 | 0 | Low-quality    | Genome-fragment | NA | 5.31  |
| S2-final-viral-combined_k141_66557[full]    | 3316  | No  | NA   | 2 | 0 | Low-quality    | Genome-fragment | NA | 7.73  |
| S12_k141_289088                             | 1256  | No  | NA   | 0 | 0 | Not-determined | Genome-fragment | NA | 0     |
| S12_k141_171563                             | 3349  | No  | NA   | 0 | 0 | Not-determined | Genome-fragment | NA | 0     |
| S12_k141_205514                             | 1120  | No  | NA   | 0 | 1 | Not-determined | Genome-fragment | NA | 0     |
| S12_k141_372949                             | 1263  | No  | NA   | 0 | 1 | Not-determined | Genome-fragment | NA | 0     |
| S2-final-viral-combined_k141_213214[full]   | 3317  | No  | NA   | 0 | 3 | Low-quality    | Genome-fragment | NA | 0.31  |
| S12_k141_4362                               | 1862  | No  | NA   | 0 | 1 | Not-determined | Genome-fragment | NA | 0     |
| S2-final-viral-combined_k141_213916[full]   | 3317  | No  | NA   | 1 | 0 | Low-quality    | Genome-fragment | NA | 3.72  |
| S12_k141_221892                             | 1059  | No  | NA   | 0 | 1 | Not-determined | Genome-fragment | NA | 0     |
| S12_k141_306204                             | 2765  | No  | NA   | 0 | 1 | Not-determined | Genome-fragment | NA | 0     |
| S2-final-viral-combined_k141_82161[full]    | 3317  | No  | NA   | 0 | 0 | Low-quality    | Genome-fragment | NA | 10.14 |
| S12_k141_255023                             | 1318  | No  | NA   | 0 | 0 | Not-determined | Genome-fragment | NA | 0     |
| S12_k141_205150                             | 3016  | No  | NA   | 0 | 3 | Not-determined | Genome-fragment | NA | 0     |
| S12_k141_272178                             | 1022  | No  | NA   | 0 | 1 | Not-determined | Genome-fragment | NA | 0     |
| S12_k141_255041                             | 4187  | No  | NA   | 0 | 2 | Not-determined | Genome-fragment | NA | 0     |
| S12_k141_289197                             | 2444  | No  | NA   | 0 | 0 | Not-determined | Genome-fragment | NA | 0     |
| S12_k141_118598                             | 2216  | No  | NA   | 0 | 1 | Not-determined | Genome-fragment | NA | 0     |
| S12_k141_118599                             | 1479  | No  | NA   | 0 | 1 | Not-determined | Genome-fragment | NA | 0     |
| S4-final-viral-combined_k141_126705[full]   | 3317  | Yes | 1566 | 1 | 1 | Low-quality    | Genome-fragment | NA | 2.23  |
| S12_k141_318939                             | 1046  | No  | NA   | 0 | 0 | Not-determined | Genome-fragment | NA | 52.79 |
| S8-final-viral-combined_k141_123611[full]   | 3318  | No  | NA   | 0 | 1 | Low-quality    | Genome-fragment | NA | 3.94  |
| S12_k141_322600                             | 1307  | No  | NA   | 0 | 2 | Not-determined | Genome-fragment | NA | 0     |
| S1_k141_164399                              | 3319  | No  | NA   | 0 | 0 | Low-quality    | Genome-fragment | NA | 6.88  |
| S12_k141_189181                             | 1216  | No  | NA   | 0 | 1 | Not-determined | Genome-fragment | NA | 0     |
| S12_k141_84867                              | 3319  | Yes | 649  | 1 | 1 | Low-quality    | Genome-fragment | NA | 0.7   |
| S12_k141_238774                             | 1076  | No  | NA   | 0 | 1 | Not-determined | Genome-fragment | NA | 80.45 |
| S12_k141_104697                             | 8408  | No  | NA   | 0 | 2 | Not-determined | Genome-fragment | NA | 0     |
| S12_k141_322661                             | 1401  | No  | NA   | 0 | 1 | Not-determined | Genome-fragment | NA | 0     |
| S12_k141_272308                             | 2336  | No  | NA   | 0 | 1 | Not-determined | Genome-fragment | NA | 0     |
| S12_k141_231879                             | 1041  | No  | NA   | 0 | 0 | Not-determined | Genome-fragment | NA | 0     |
| S11-final-viral-combined_k141_2716521[full] | 3320  | No  | NA   | 3 | 0 | Low-quality    | Genome-fragment | NA | 7.02  |
| S12_k141_71942                              | 2184  | No  | NA   | 0 | 0 | Not-determined | Genome-fragment | NA | 0     |
| S1-final-viral-combined_k141_1320921[full]  | 3321  | No  | NA   | 0 | 2 | Low-quality    | Genome-fragment | NA | 6.89  |
| S12_k141_21261                              | 1479  | No  | NA   | 0 | 2 | Not-determined | Genome-fragment | NA | 0     |
| S12_k141_171743                             | 1722  | No  | NA   | 0 | 1 | Not-determined | Genome-fragment | NA | 0     |
| S12_k141_322703                             | 1166  | No  | NA   | 0 | 0 | Not-determined | Genome-fragment | NA | 0     |
| S12_k141_88088                              | 1545  | No  | NA   | 0 | 0 | Not-determined | Genome-fragment | NA | 0     |
| S12_k141_88091                              | 1504  | No  | NA   | 0 | 1 | Not-determined | Genome-fragment | NA | 0     |
| S12_k141_138744                             | 1170  | No  | NA   | 0 | 1 | Not-determined | Genome-fragment | NA | 0     |
| S12_k141_271769                             | 3987  | No  | NA   | 0 | 1 | Not-determined | Genome-fragment | NA | 0     |
| S7-final-viral-combined_k141_177871[full]   | 3321  | No  | NA   | 0 | 2 | Low-quality    | Genome-fragment | NA | 1.91  |
| S12_k141_54595                              | 3104  | No  | NA   | 0 | 0 | Not-determined | Genome-fragment | NA | 0     |
| S12_k141_71981                              | 8191  | No  | NA   | 0 | 3 | Not-determined | Genome-fragment | NA | 0     |
| S12_k141_104771                             | 5312  | No  | NA   | 0 | 2 | Not-determined | Genome-fragment | NA | 0     |
| S12_k141_389666                             | 1924  | No  | NA   | 0 | 1 | Not-determined | Genome-fragment | NA | 0     |
| S12-final-viral-combined_k141_1899921[full] | 3321  | No  | NA   | 0 | 0 | Low-quality    | Genome-fragment | NA | 10.38 |
| S12_k141_289420                             | 1210  | No  | NA   | 0 | 1 | Not-determined | Genome-fragment | NA | 0     |
| S12_k141_4543                               | 4124  | No  | NA   | 0 | 0 | Not-determined | Genome-fragment | NA | 0     |
| S4-final-viral-combined_k141_557061[full]   | 3321  | No  | NA   | 0 | 2 | Low-quality    | Genome-fragment | NA | 5.2   |
| S12_k141_189246                             | 1322  | No  | NA   | 0 | 0 | Not-determined | Genome-fragment | NA | 0     |
| S12_k141_38193                              | 1218  | No  | NA   | 0 | 1 | Not-determined | Genome-fragment | NA | 0     |
| S12_k141_121151                             | 1117  | No  | NA   | 0 | 2 | Not-determined | Genome-fragment | NA | 0     |
| S12_k141_306399                             | 1404  | No  | NA   | 0 | 0 | Not-determined | Genome-fragment | NA | 0     |
| S11-final-viral-combined_k141_2274271[full] | 3322  | No  | NA   | 0 | 0 | Low-quality    | Genome-fragment | NA | 5.89  |
| S12_k141_38220                              | 2160  | No  | NA   | 0 | 2 | Not-determined | Genome-fragment | NA | 0     |
| S12_k141_38223                              | 1503  | No  | NA   | 0 | 1 | Not-determined | Genome-fragment | NA | 0     |
| S12_k141_203346                             | 1867  | No  | NA   | 0 | 0 | Not-determined | Genome-fragment | NA | 0     |
| S12_k141_339104                             | 1763  | No  | NA   | 0 | 3 | Not-determined | Genome-fragment | NA | 0     |
| S12_k141_21347                              | 3087  | No  | NA   | 0 | 2 | Not-determined | Genome-fragment | NA | 0     |
| S12_k141_189314                             | 1092  | No  | NA   | 0 | 0 | Not-determined | Genome-fragment | NA | 0     |
| S12_k141_38245                              | 1015  | No  | NA   | 0 | 0 | Not-determined | Genome-fragment | NA | 0     |
| S12_k141_221990                             | 1370  | No  | NA   | 0 | 2 | Not-determined | Genome-fragment | NA | 0     |
| S12_k141_238923                             | 1919  | No  | NA   | 0 | 1 | Not-determined | Genome-fragment | NA | 0     |
| S12_k141_21358                              | 1428  | No  | NA   | 0 | 7 | Not-determined | Genome-fragment | NA | 0     |
| S12_k141_289540                             | 1768  | No  | NA   | 0 | 0 | Not-determined | Genome-fragment | NA | 0     |
| S12_k141_289548                             | 1122  | No  | NA   | 0 | 0 | Not-determined | Genome-fragment | NA | 0     |
| S12_k141_351700                             | 1168  | No  | NA   | 0 | 0 | Not-determined | Genome-fragment | NA | 0     |
| S12_k141_155188                             | 4510  | No  | NA   | 0 | 1 | Not-determined | Genome-fragment | NA | 0     |
| S17-final-viral-combined_k141_2292121[full] | 3322  | No  | NA   | 3 | 0 | Low-quality    | Genome-fragment | NA | 9.63  |
| S12_k141_228970                             | 2056  | No  | NA   | 0 | 1 | Not-determined | Genome-fragment | NA | 0     |
| S12_k141_98757                              | 3322  | No  | NA   | 3 | 0 | Low-quality    | Genome-fragment | NA | 8.69  |
| S12_k141_272489                             | 3184  | No  | NA   | 0 | 3 | Not-determined | Genome-fragment | NA | 0     |
| S4-final-viral-combined_k141_1465891[full]  | 3322  | No  | NA   | 0 | 0 | Low-quality    | Genome-fragment | NA | 3.07  |
| S3_k141_13859                               | 3323  | No  | NA   | 2 | 0 | Low-quality    | Genome-fragment | NA | 5.75  |
| S12_k141_72136                              | 2441  | No  | NA   | 0 | 0 | Not-determined | Genome-fragment | NA | 0     |
| S12_k141_239012                             | 4683  | No  | NA   | 0 | 3 | Not-determined | Genome-fragment | NA | 0     |
| S12_k141_371345                             | 1069  | No  | NA   | 0 | 1 | Not-determined | Genome-fragment | NA | 0     |
| S12_k141_339185                             | 1248  | No  | NA   | 0 | 0 | Not-determined | Genome-fragment | NA | 0     |
| S17-final-viral-combined_k141_1479251[full] | 3323  | Yes | 2595 | 1 | 1 | Low-quality    | Genome-fragment | NA | 1.63  |
| S12_k141_389787                             | 5271  | No  | NA   | 0 | 1 | Not-determined | Genome-fragment | NA | 21.91 |
| S2-final-viral-combined_k141_1850821[full]  | 3323  | No  | NA   | 0 | 0 | Low-quality    | Genome-fragment | NA | 7.3   |
| S12_k141_373399                             | 1325  | No  | NA   | 0 | 2 | Not-determined | Genome-fragment | NA | 0     |
| S12_k141_118921                             | 2558  | No  | NA   | 0 | 0 | Not-determined | Genome-fragment | NA | 0     |
| S12_k141_254009                             | 1261  | No  | NA   | 0 | 1 | Not-determined | Genome-fragment | NA | 0     |
| S12_k141_306515                             | 1731  | No  | NA   | 0 | 0 | Not-determined | Genome-fragment | NA | 0     |
| S12_k141_323024                             | 1630  | No  | NA   | 0 | 0 | Not-determined | Genome-fragment | NA | 0     |
| S12_k141_121301                             | 1249  | No  | NA   | 0 | 0 | Not-determined | Genome-fragment | NA | 0     |
| S12_k141_38501                              | 2230  | No  | NA   | 0 | 1 | Not-determined | Genome-fragment | NA | 0     |
| S12_k141_105140                             | 1367  | No  | NA   | 0 | 1 | Not-determined | Genome-fragment | NA | 0     |
| S12_k141_151515                             | 1310  | No  | NA   | 0 | 1 | Not-determined | Genome-fragment | NA | 0     |
| S12_k141_272637                             | 10142 | No  | NA   | 0 | 0 | Not-determined | Genome-fragment | NA | 0     |
| S12_k141_255472                             | 1235  | No  | NA   | 0 | 1 | Not-determined | Genome-fragment | NA | 0     |
| S12_k141_345752                             | 1615  | No  | NA   | 0 | 1 | Not-determined | Genome-fragment | NA | 0     |
| S12_k141_354889                             | 1098  | No  | NA   | 0 | 0 | Not-determined | Genome-fragment | NA | 0     |
| S12_k141_339373                             | 1747  | No  | NA   | 0 | 0 | Not-determined | Genome-fragment | NA | 0     |
| S11-final-viral-combined_k141_1965051[full] | 3324  | No  | NA   | 0 | 3 | Low-quality    | Genome-fragment | NA | 2.54  |
| S2-final-viral-combined_k141_79501[full]    | 3325  | No  | NA   | 0 | 0 | Low-quality    | Genome-fragment | NA | 3.06  |
| S12_k141_355902                             | 1071  | No  | NA   | 0 | 1 | Not-determined | Genome-fragment | NA | 0     |
| S4_k141_1954                                | 3325  | No  | NA   | 0 | 1 | Low-quality    | Genome-fragment | NA | 5.3   |
| S12_k141_72123                              | 1028  | No  | NA   | 0 | 0 | Not-determined | Genome-fragment | NA | 0     |
| S1-final-viral-combined_k141_693531[full]   | 3326  | No  | NA   | 0 | 2 | Low-quality    | Genome-fragment | NA | 1.57  |
| S12_k141_4686                               | 2190  | No  | NA   | 0 | 2 | Not-determined | Genome-fragment | NA | 0     |
| S12_k141_155523                             | 1920  | No  | NA   | 0 | 0 | Not-determined | Genome-fragment | NA | 0     |
| S1_k141_135140                              | 3326  | No  | NA   | 0 | 1 | Low-quality    | Genome-fragment | NA | 1.79  |
| S12_k141_389922                             | 1550  | No  | NA   | 0 | 0 | Not-determined | Genome-fragment | NA | 0     |
| S12_k141_355935                             | 1754  | No  | NA   | 0 | 2 | Not-determined | Genome-fragment | NA | 0     |
| S12_k141_88406                              | 1002  | No  | NA   | 0 | 1 | Not-determined | Genome-fragment | NA | 0     |
| S1_k141_335678                              | 3326  | No  | NA   | 1 | 0 | Low-quality    | Genome-fragment | NA | 2.43  |
| S12_k141_189664                             | 1677  | No  | NA   | 0 | 1 | Not-determined | Genome-fragment | NA | 0     |
| S12_k141_239471                             | 2544  | No  | NA   | 0 | 2 | Not-determined | Genome-fragment | NA | 0     |
| S5-final-viral-combined_k141_283351[full]   | 3326  | No  | NA   | 0 | 4 | Low-quality    | Genome-fragment | NA | 3.12  |
| S12_k141_390023                             | 2881  | No  | NA   | 0 | 2 | Not-determined | Genome-fragment | NA | 0     |
| S12_k141_28674                              | 1011  | No  | NA   | 0 | 1 | Not-determined | Genome-fragment | NA | 0     |
| S12_k141_54893                              | 4734  | No  | NA   | 0 | 3 | Not-determined | Genome-fragment | NA | 0     |
| S5-final-viral-combined_k141_80921[full]    | 3326  | Yes | 792  | 1 | 1 | Low-quality    | Genome-fragment | NA | 1.5   |
| S12_k141_339486                             | 3478  | No  | NA   | 0 | 1 | Not-determined | Genome-fragment | NA | 76.19 |
| S12_k141_390054                             | 3512  | No  | NA   | 0 | 1 | Not-determined | Genome-fragment | NA | 0     |
| S12_k141_272751                             | 1093  | No  | NA   | 0 | 1 | Not-determined | Genome-fragment | NA | 0     |
| S12_k141_139072                             | 6835  | No  | NA   | 0 | 1 | Not-determined | Genome-fragment | NA | 0     |
| S12_k141_171201                             | 2302  | No  | NA   | 0 | 2 | Not-determined | Genome-fragment | NA | 0     |
| S12_k141_239264                             | 1016  | No  | NA   | 0 | 1 | Not-determined | Genome-fragment | NA | 0     |
| S12_k141_38717                              | 2193  | No  | NA   | 0 | 1 | Not-determined | Genome-fragment | NA | 0     |
| S12_k141_86495                              | 2565  | No  | NA   | 0 | 0 | Not-determined | Genome-fragment | NA | 0     |
| S17-k141_202635                             | 3327  | No  | NA   | 0 | 0 | Low-quality    | Genome-fragment | NA | 3.08  |
| S4_k141_115111                              | 3327  | No  | NA   | 0 | 0 | Low-quality    | Genome-fragment | NA | 3.22  |
| S12_k141_38752                              | 1125  | No  | NA   | 0 | 0 | Not-determined | Genome-fragment | NA | 0     |
| S12_k141_205562                             | 1132  | No  | NA   | 0 | 1 | Not-determined | Genome-fragment | NA | 0     |
| S12_k141_373671                             | 1010  | No  | NA   | 0 | 0 | Not-determined | Genome-fragment | NA | 0     |
| S12_k141_239281                             | 1260  | No  | NA   | 0 | 0 | Not-determined | Genome-fragment | NA | 0     |
| S3-final-viral-combined_k141_560081[full]   | 3328  | No  | NA   |   |   |                |                 |    |       |



|                                            |       |     |      |   |    |                |                 |       |       |
|--------------------------------------------|-------|-----|------|---|----|----------------|-----------------|-------|-------|
| S12_k141_273017                            | 1000  | No  | NA   | 0 | 0  | Not-determined | Genome-fragment | NA    | 0     |
| S12_k141_273035                            | 1003  | No  | NA   | 0 | 0  | Not-determined | Genome-fragment | NA    | 0     |
| S12_k141_189975                            | 1065  | No  | NA   | 0 | 0  | Not-determined | Genome-fragment | NA    | 0     |
| S12_k141_323338                            | 1588  | No  | NA   | 0 | 1  | Not-determined | Genome-fragment | NA    | 0     |
| S12_k141_307155                            | 3045  | No  | NA   | 0 | 2  | Not-determined | Genome-fragment | NA    | 0     |
| S12_k141_390386                            | 1139  | No  | NA   | 0 | 2  | Not-determined | Genome-fragment | NA    | 0     |
| S1-final-viral-combined_k141_148963  full  | 3332  | No  | NA   | 0 | 0  | Low-quality    | Genome-fragment | 6.25  | 0     |
| S12_k141_239436                            | 1143  | No  | NA   | 0 | 1  | Not-determined | Genome-fragment | NA    | 0     |
| S12_k141_390393                            | 1225  | No  | NA   | 0 | 1  | Not-determined | Genome-fragment | NA    | 0     |
| S12_k141_373775                            | 14211 | No  | NA   | 2 | 1  | High-quality   | High-quality    | 97.66 | 0     |
| S12_k141_323394                            | 1003  | No  | NA   | 0 | 0  | Not-determined | Genome-fragment | NA    | 0     |
| S12_k141_155888                            | 3105  | No  | NA   | 0 | 1  | Not-determined | Genome-fragment | NA    | 0     |
| S1_k141_358238                             | 3332  | No  | NA   | 0 | 2  | Low-quality    | Genome-fragment | 0.37  | 0     |
| S12_k141_39071                             | 6507  | No  | NA   | 0 | 3  | Not-determined | Genome-fragment | NA    | 0     |
| S17_k141_63763                             | 3332  | No  | NA   | 0 | 2  | Low-quality    | Genome-fragment | 3.3   | 0     |
| S12_k141_105532                            | 3314  | No  | NA   | 0 | 1  | Not-determined | Genome-fragment | NA    | 0     |
| S12_k141_290208                            | 1405  | No  | NA   | 0 | 2  | Not-determined | Genome-fragment | NA    | 0     |
| S1_k141_177585                             | 3333  | No  | NA   | 1 | 0  | Low-quality    | Genome-fragment | 5.26  | 0     |
| S12_k141_98820                             | 1426  | No  | NA   | 0 | 1  | Not-determined | Genome-fragment | NA    | 0     |
| S2-final-viral-combined_k141_8273  full    | 3333  | No  | NA   | 0 | 3  | Low-quality    | Genome-fragment | 7.36  | 0     |
| S6_k141_140139                             | 3333  | No  | NA   | 0 | 0  | Low-quality    | Genome-fragment | 8.18  | 0     |
| S12_k141_256070                            | 1671  | No  | NA   | 0 | 0  | Not-determined | Genome-fragment | NA    | 0     |
| S12_k141_356079                            | 1126  | No  | NA   | 0 | 1  | Not-determined | Genome-fragment | NA    | 0     |
| S12_k141_105590                            | 2892  | No  | NA   | 0 | 3  | Not-determined | Genome-fragment | NA    | 0     |
| S12_k141_356084                            | 1388  | No  | NA   | 0 | 0  | Not-determined | Genome-fragment | NA    | 0     |
| S12_k141_313475                            | 2343  | No  | NA   | 0 | 1  | Not-determined | Genome-fragment | NA    | 0     |
| S12-final-viral-combined_k141_114503  full | 3334  | No  | NA   | 4 | 0  | Low-quality    | Genome-fragment | 7.8   | 0     |
| S12_k141_307254                            | 3847  | No  | NA   | 0 | 8  | Not-determined | Genome-fragment | NA    | 0     |
| S12_k141_373898                            | 1609  | No  | NA   | 0 | 1  | Not-determined | Genome-fragment | NA    | 0     |
| S7-final-viral-combined_k141_226036  full  | 3335  | No  | NA   | 0 | 0  | Low-quality    | Genome-fragment | 5.44  | 0     |
| S1_k141_23558                              | 3338  | No  | NA   | 2 | 0  | Low-quality    | Genome-fragment | 8.58  | 0     |
| S12_k141_191928                            | 4119  | No  | NA   | 0 | 0  | Not-determined | Genome-fragment | NA    | 0     |
| S12_k141_205816                            | 7077  | No  | NA   | 0 | 2  | Not-determined | Genome-fragment | NA    | 0     |
| S8-final-viral-combined_k141_81554  full   | 3339  | No  | NA   | 0 | 2  | Low-quality    | Genome-fragment | 2.71  | 0     |
| S12_k141_273227                            | 6963  | No  | NA   | 0 | 3  | Not-determined | Genome-fragment | NA    | 0     |
| S7-final-viral-combined_k141_61355  full   | 3339  | No  | NA   | 1 | 0  | Low-quality    | Genome-fragment | 3.84  | 0     |
| S12_k141_290357                            | 1367  | No  | NA   | 0 | 0  | Not-determined | Genome-fragment | NA    | 0     |
| S12_k141_323588                            | 5942  | No  | NA   | 0 | 1  | Not-determined | Genome-fragment | NA    | 0     |
| S12_k141_156073                            | 1002  | No  | NA   | 0 | 0  | Not-determined | Genome-fragment | NA    | 0     |
| S12_k141_121787                            | 8398  | No  | NA   | 0 | 4  | Not-determined | Genome-fragment | NA    | 0     |
| S7_k141_164505                             | 3339  | No  | NA   | 0 | 2  | Low-quality    | Genome-fragment | 0.92  | 0     |
| S12_k141_307338                            | 1448  | No  | NA   | 0 | 2  | Not-determined | Genome-fragment | NA    | 0     |
| S12_k141_390589                            | 1913  | No  | NA   | 0 | 1  | Not-determined | Genome-fragment | NA    | 0     |
| S12_k141_205867                            | 1042  | No  | NA   | 0 | 0  | Not-determined | Genome-fragment | NA    | 0     |
| S12_k141_205871                            | 3574  | No  | NA   | 0 | 1  | Not-determined | Genome-fragment | NA    | 0     |
| S12_k141_88933                             | 4059  | No  | NA   | 0 | 2  | Not-determined | Genome-fragment | NA    | 0     |
| S12_k141_222810                            | 1043  | No  | NA   | 0 | 1  | Not-determined | Genome-fragment | NA    | 0     |
| S12_k141_307388                            | 1304  | No  | NA   | 0 | 0  | Not-determined | Genome-fragment | NA    | 0     |
| S12_k141_390635                            | 1444  | No  | NA   | 0 | 0  | Not-determined | Genome-fragment | NA    | 0     |
| S12_k141_390649                            | 1214  | No  | NA   | 0 | 1  | Not-determined | Genome-fragment | NA    | 0     |
| S12_k141_55044                             | 1283  | No  | NA   | 0 | 0  | Not-determined | Genome-fragment | NA    | 0     |
| S12_k141_307410                            | 2028  | No  | NA   | 0 | 1  | Not-determined | Genome-fragment | NA    | 0     |
| S12_k141_134453                            | 3339  | No  | NA   | 1 | 0  | Low-quality    | Genome-fragment | 9.51  | 0     |
| S12_k141_390687                            | 1015  | No  | NA   | 0 | 1  | Not-determined | Genome-fragment | NA    | 0     |
| S12_k141_39147                             | 1242  | No  | NA   | 0 | 1  | Not-determined | Genome-fragment | NA    | 0     |
| S12_k141_55097                             | 1775  | No  | NA   | 0 | 1  | Not-determined | Genome-fragment | NA    | 0     |
| S12_k141_256291                            | 1147  | No  | NA   | 0 | 1  | Not-determined | Genome-fragment | NA    | 0     |
| S12_k141_156198                            | 4264  | No  | NA   | 0 | 2  | Not-determined | Genome-fragment | NA    | 0     |
| S11-final-viral-combined_k141_209135  full | 3340  | No  | NA   | 0 | 0  | Low-quality    | Genome-fragment | 6.71  | 0     |
| S12_k141_39182                             | 1106  | No  | NA   | 0 | 1  | Not-determined | Genome-fragment | NA    | 0     |
| S12_k141_121921                            | 1058  | No  | NA   | 0 | 1  | Not-determined | Genome-fragment | NA    | 0     |
| S11-final-viral-combined_k141_204350  full | 3340  | No  | NA   | 0 | 0  | Low-quality    | Genome-fragment | 8.28  | 0     |
| S5-final-viral-combined_k141_186913  full  | 3340  | No  | NA   | 0 | 1  | Low-quality    | Genome-fragment | 5.59  | 0     |
| S12_k141_323787                            | 1800  | No  | NA   | 0 | 1  | Not-determined | Genome-fragment | NA    | 0     |
| S12_k141_51190                             | 1411  | No  | NA   | 0 | 0  | Not-determined | Genome-fragment | NA    | 0     |
| S5_k141_142011                             | 3340  | No  | NA   | 0 | 0  | Low-quality    | Genome-fragment | 6.43  | 0     |
| S12_k141_5206                              | 6774  | No  | NA   | 0 | 6  | Not-determined | Genome-fragment | NA    | 0     |
| S12_k141_55184                             | 2142  | No  | NA   | 0 | 2  | Not-determined | Genome-fragment | NA    | 0     |
| S12_k141_119483                            | 2586  | No  | NA   | 0 | 1  | Not-determined | Genome-fragment | NA    | 0     |
| S12_k141_55206                             | 1410  | No  | NA   | 0 | 2  | Not-determined | Genome-fragment | NA    | 0     |
| S7_k141_14842                              | 3340  | No  | NA   | 0 | 0  | Low-quality    | Genome-fragment | 6.36  | 0     |
| S4_k141_160823                             | 3340  | No  | NA   | 0 | 0  | Low-quality    | Genome-fragment | 10.29 | 0     |
| S12_k141_39288                             | 1028  | No  | NA   | 0 | 0  | Not-determined | Genome-fragment | NA    | 0     |
| S12_k141_390779                            | 8486  | No  | NA   | 0 | 3  | Not-determined | Genome-fragment | NA    | 0     |
| S12_k141_256324                            | 1043  | No  | NA   | 0 | 0  | Not-determined | Genome-fragment | NA    | 0     |
| S12_k141_256326                            | 1577  | No  | NA   | 0 | 1  | Not-determined | Genome-fragment | NA    | 0     |
| S12_k141_55217                             | 1279  | No  | NA   | 0 | 1  | Not-determined | Genome-fragment | NA    | 0     |
| S12_k141_390789                            | 1222  | No  | NA   | 0 | 0  | Not-determined | Genome-fragment | NA    | 0     |
| S12_k141_390790                            | 1508  | No  | NA   | 0 | 0  | Not-determined | Genome-fragment | NA    | 0     |
| S12_k141_273437                            | 1222  | No  | NA   | 0 | 1  | Not-determined | Genome-fragment | NA    | 0     |
| S12_k141_105716                            | 1401  | No  | NA   | 0 | 1  | Not-determined | Genome-fragment | NA    | 0     |
| S8-final-viral-combined_k141_22615  full   | 3340  | Yes | 2604 | 1 | 0  | Low-quality    | Genome-fragment | 6.88  | 22.04 |
| S12_k141_374007                            | 1036  | No  | NA   | 0 | 1  | Not-determined | Genome-fragment | NA    | 0     |
| S12_k141_390843                            | 1239  | No  | NA   | 0 | 0  | Not-determined | Genome-fragment | NA    | 0     |
| S11-final-viral-combined_k141_208002  full | 3341  | No  | NA   | 0 | 0  | Low-quality    | Genome-fragment | 6.99  | 0     |
| S12_k141_55259                             | 3224  | No  | NA   | 0 | 1  | Not-determined | Genome-fragment | NA    | 0     |
| S12_k141_223053                            | 1178  | No  | NA   | 0 | 0  | Not-determined | Genome-fragment | NA    | 0     |
| S12_k141_206028                            | 3203  | No  | NA   | 0 | 2  | Not-determined | Genome-fragment | NA    | 0     |
| S12_k141_105771                            | 1202  | No  | NA   | 0 | 2  | Not-determined | Genome-fragment | NA    | 0     |
| S12_k141_139537                            | 1623  | No  | NA   | 0 | 1  | Not-determined | Genome-fragment | NA    | 0     |
| S12_k141_256380                            | 12505 | No  | NA   | 0 | 23 | Not-determined | Genome-fragment | NA    | 0     |
| S12_k141_156330                            | 2457  | No  | NA   | 0 | 2  | Not-determined | Genome-fragment | NA    | 0     |
| S12_k141_190463                            | 1037  | No  | NA   | 0 | 0  | Not-determined | Genome-fragment | NA    | 0     |
| S12_k141_105778                            | 1643  | No  | NA   | 0 | 1  | Not-determined | Genome-fragment | NA    | 0     |
| S11_k141_296993                            | 3341  | No  | NA   | 0 | 2  | Low-quality    | Genome-fragment | 7.19  | 0     |
| S12_k141_273504                            | 1397  | No  | NA   | 0 | 1  | Not-determined | Genome-fragment | NA    | 0     |
| S12_k141_55294                             | 1343  | No  | NA   | 0 | 1  | Not-determined | Genome-fragment | NA    | 0     |
| S12_k141_239926                            | 1473  | No  | NA   | 0 | 0  | Not-determined | Genome-fragment | NA    | 0     |
| S12_k141_89168                             | 1276  | No  | NA   | 0 | 1  | Not-determined | Genome-fragment | NA    | 0     |
| S12_k141_55300                             | 2165  | No  | NA   | 0 | 1  | Not-determined | Genome-fragment | NA    | 0     |
| S12_k141_307638                            | 1419  | No  | NA   | 0 | 0  | Not-determined | Genome-fragment | NA    | 0     |
| S7-final-viral-combined_k141_63740  full   | 3341  | No  | NA   | 1 | 0  | Low-quality    | Genome-fragment | 5.95  | 0     |
| S12_k141_139604                            | 1129  | No  | NA   | 0 | 1  | Not-determined | Genome-fragment | NA    | 0     |
| S7-final-viral-combined_k141_173177  full  | 3341  | No  | NA   | 0 | 0  | Low-quality    | Genome-fragment | 1.69  | 0     |
| S12_k141_356320                            | 1693  | No  | NA   | 0 | 1  | Not-determined | Genome-fragment | NA    | 0     |
| S12_k141_73169                             | 1194  | No  | NA   | 0 | 1  | Not-determined | Genome-fragment | NA    | 0     |
| S12_k141_374101                            | 1615  | No  | NA   | 0 | 1  | Not-determined | Genome-fragment | NA    | 0     |
| S11-final-viral-combined_k141_96961  full  | 3342  | No  | NA   | 0 | 0  | Low-quality    | Genome-fragment | 2.32  | 0     |
| S12_k141_374114                            | 1616  | No  | NA   | 0 | 0  | Not-determined | Genome-fragment | NA    | 0     |
| S7_k141_62079                              | 3342  | No  | NA   | 0 | 3  | Low-quality    | Genome-fragment | 6.01  | 0     |
| S12_k141_139659                            | 7870  | No  | NA   | 0 | 3  | Not-determined | Genome-fragment | NA    | 0     |
| S12_k141_374124                            | 1641  | No  | NA   | 0 | 1  | Not-determined | Genome-fragment | NA    | 0     |
| S7-final-viral-combined_k141_56109  full   | 3344  | No  | NA   | 1 | 4  | Low-quality    | Genome-fragment | 6.7   | 0     |
| S9-final-viral-combined_k141_109571  full  | 3345  | No  | NA   | 0 | 0  | Low-quality    | Genome-fragment | 5.09  | 0     |
| S17_k141_240350                            | 3346  | No  | NA   | 0 | 2  | Low-quality    | Genome-fragment | 5.18  | 0     |
| S1_k141_318563                             | 3347  | No  | NA   | 0 | 0  | Low-quality    | Genome-fragment | 2.98  | 0     |
| S5-final-viral-combined_k141_80491  full   | 3347  | No  | NA   | 3 | 0  | Low-quality    | Genome-fragment | 7.5   | 0     |
| S12_k141_374189                            | 2655  | No  | NA   | 0 | 1  | Not-determined | Genome-fragment | NA    | 0     |
| S12_k141_89257                             | 1987  | No  | NA   | 0 | 1  | Not-determined | Genome-fragment | NA    | 0     |
| S17_k141_67039                             | 3347  | No  | NA   | 0 | 4  | Low-quality    | Genome-fragment | 1.23  | 0     |
| S12_k141_39311                             | 1683  | No  | NA   | 0 | 0  | Not-determined | Genome-fragment | NA    | 0     |
| S12_k141_256333                            | 1007  | No  | NA   | 0 | 1  | Not-determined | Genome-fragment | NA    | 0     |
| S12_k141_223082                            | 1317  | No  | NA   | 0 | 0  | Not-determined | Genome-fragment | NA    | 0     |
| S12_k141_290764                            | 3655  | No  | NA   | 0 | 1  | Not-determined | Genome-fragment | NA    | 0     |
| S12_k141_273642                            | 3421  | No  | NA   | 0 | 0  | Not-determined | Genome-fragment | NA    | 0     |
| S2-final-viral-combined_k141_242247  full  | 3347  | No  | NA   | 0 | 1  | Low-quality    | Genome-fragment | 1.28  | 0     |
| S12_k141_223098                            | 1807  | No  | NA   | 0 | 0  | Not-determined | Genome-fragment | NA    | 0     |
| S8-final-viral-combined_k141_113762  full  | 3347  | No  | NA   | 0 | 1  | Low-quality    | Genome-fragment | 3.65  | 0     |
| S12_k141_390955                            | 1034  | No  | NA   | 0 | 0  | Not-determined | Genome-fragment | NA    | 0     |
| S12_k141_190711                            | 10526 | No  | NA   | 0 | 0  | Not-determined | Genome-fragment | NA    | 0     |
| S6-final-viral-combined_k141_126383  full  | 3347  | Yes | 1487 | 1 | 1  | Low-quality    | Genome-fragment | 0.83  | 55.57 |
| S12_k141_173000                            | 1081  | No  | NA   | 0 | 1  | Not-determined | Genome-fragment | NA    | 0     |
| S12_k141_39369                             | 1013  | No  | NA   | 0 | 0  | Not-determined | Genome-fragment | NA    | 0     |
| S12_k141_273683                            | 2449  | No  | NA   | 0 | 1  | Not-determined | Genome-fragment | NA    | 0     |
| S12_k141_54568                             | 5547  | No  | NA   | 0 | 3  | Not-determined | Genome-fragment | NA    | 0     |
| S12_k141_273692                            | 3245  | No  | NA   | 0 | 2  | Not-determined | Genome-fragment | NA    | 0     |
| S12_k141_122249                            | 3431  | No  | NA   | 0 | 1  | Not-determined | Genome-fragment | NA    | 0     |
| S12_k141_391001                            | 1203  | No  | NA   | 0 | 0  | Not-determined | Genome-fragment | NA    | 0     |
| S12_k141_206290                            | 1477  | No  | NA   | 0 | 0  | Not-determined | Genome-fragment | NA    | 0     |
| S12_k141_290867                            | 1110  | No  | NA   | 0 | 1  | Not-determined | Genome-fragment | NA    | 0     |
| S12_k141_156556                            | 1639  | No  | NA   | 0 | 2  | Not-determined | Genome-fragment | NA    | 0     |
| S3-final-viral-combined_k141_89637  full   | 3348  | No  | NA   | 2 | 0  | Low-quality    | Genome-fragment | 8.14  | 0     |
| S12_k141_223143                            | 1138  | No  | NA   | 0 | 1  | Not-determined | Genome-fragment | NA    | 0     |
| S12_k141_340187                            | 1185  | No  | NA   | 0 | 0  | Not-determined | Genome-fragment | NA    | 0     |
| S12_k141_190757                            | 1145  | No  | NA   | 0 | 1  | Not-determined | Genome-         |       |       |



|                                             |       |     |    |      |   |                |                 |    |       |       |
|---------------------------------------------|-------|-----|----|------|---|----------------|-----------------|----|-------|-------|
| S12_k141_106186                             | 1509  | No  | NA | 0    | 1 | Not-determined | Genome-fragment | NA |       | 0     |
| S17-final-viral-combined_k141_1516611[full] | 3351  | No  | NA | 0    | 1 | Low-quality    | Genome-fragment | NA | 7.94  | 0     |
| S12_k141_106189                             | 1024  | No  | NA | 0    | 0 | Not-determined | Genome-fragment | NA |       | 0     |
| S12_k141_256644                             | 1577  | No  | NA | 0    | 1 | Not-determined | Genome-fragment | NA |       | 0     |
| S12_k141_374362                             | 1985  | No  | NA | 0    | 0 | Not-determined | Genome-fragment | NA |       | 0     |
| S17-k141_90348                              | 3351  | No  | NA | 1    | 0 | Low-quality    | Genome-fragment | NA | 3.56  | 0     |
| S12_k141_122425                             | 1377  | No  | NA | 0    | 0 | Not-determined | Genome-fragment | NA |       | 0     |
| S12_k141_240303                             | 2978  | No  | NA | 0    | 0 | Not-determined | Genome-fragment | NA |       | 0     |
| S12_k141_307933                             | 1291  | No  | NA | 0    | 1 | Not-determined | Genome-fragment | NA |       | 0     |
| S12_k141_240312                             | 1114  | No  | NA | 0    | 1 | Not-determined | Genome-fragment | NA |       | 0     |
| S12_k141_122432                             | 5460  | No  | NA | 0    | 3 | Not-determined | Genome-fragment | NA |       | 0     |
| S12_k141_22230                              | 3351  | No  | NA | 0    | 2 | Low-quality    | Genome-fragment | NA | 9.45  | 0     |
| S12_k141_391234                             | 1648  | No  | NA | 0    | 2 | Not-determined | Genome-fragment | NA |       | 0     |
| S12_k141_55556                              | 1117  | No  | NA | 0    | 1 | Not-determined | Genome-fragment | NA |       | 0     |
| S12_k141_324293                             | 1531  | No  | NA | 0    | 0 | Not-determined | Genome-fragment | NA |       | 0     |
| S12_k141_55572                              | 1552  | No  | NA | 0    | 2 | Not-determined | Genome-fragment | NA |       | 0     |
| S12_k141_122490                             | 1794  | No  | NA | 0    | 0 | Not-determined | Genome-fragment | NA |       | 0     |
| S12_k141_173248                             | 1615  | No  | NA | 0    | 1 | Not-determined | Genome-fragment | NA |       | 0     |
| S2-final-viral-combined_k141_159874[full]   | 3352  | No  | NA | 0    | 2 | Low-quality    | Genome-fragment | NA | 1.85  | 0     |
| S11-final-viral-combined_k141_45324[full]   | 3353  | No  | NA | 3    | 0 | Low-quality    | Genome-fragment | NA | 4.45  | 0     |
| S12_k141_55611                              | 4802  | No  | NA | 0    | 3 | Not-determined | Genome-fragment | NA |       | 0     |
| S12_k141_256782                             | 1057  | No  | NA | 0    | 1 | Not-determined | Genome-fragment | NA |       | 0     |
| S12_k141_223458                             | 4481  | No  | NA | 0    | 2 | Not-determined | Genome-fragment | NA |       | 0     |
| S12_k141_240419                             | 2091  | No  | NA | 0    | 1 | Not-determined | Genome-fragment | NA |       | 0     |
| S12_k141_154849                             | 3873  | No  | NA | 0    | 1 | Not-determined | Genome-fragment | NA |       | 0     |
| S1-final-viral-combined_k141_27202[full]    | 3353  | No  | NA | 0    | 1 | Low-quality    | Genome-fragment | NA | 0.96  | 0     |
| S12_k141_5799                               | 1049  | No  | NA | 0    | 0 | Not-determined | Genome-fragment | NA |       | 0     |
| S12_k141_89612                              | 1252  | No  | NA | 0    | 1 | Not-determined | Genome-fragment | NA |       | 0     |
| S12-final-viral-combined_k141_349808[full]  | 3353  | No  | NA | 0    | 0 | Low-quality    | Genome-fragment | NA | 5.42  | 0     |
| S12_k141_55672                              | 2343  | No  | NA | 0    | 1 | Not-determined | Genome-fragment | NA |       | 0     |
| S12_k141_291258                             | 8014  | No  | NA | 0    | 2 | Not-determined | Genome-fragment | NA |       | 0     |
| S1-final-viral-combined_k141_254135[full]   | 3354  | No  | NA | 1    | 2 | Low-quality    | Genome-fragment | NA | 1.51  | 0     |
| S11-final-viral-combined_k141_157611[full]  | 3356  | No  | NA | 0    | 0 | Low-quality    | Genome-fragment | NA | 5.06  | 0     |
| S12_k141_291281                             | 1400  | No  | NA | 0    | 1 | Not-determined | Genome-fragment | NA |       | 0     |
| S12_k141_122842                             | 1752  | No  | NA | 0    | 1 | Not-determined | Genome-fragment | NA |       | 0     |
| S12_k141_308104                             | 3128  | No  | NA | 0    | 1 | Not-determined | Genome-fragment | NA |       | 0     |
| S3-final-viral-combined_k141_61142[full]    | 3356  | No  | NA | 1    | 0 | Low-quality    | Genome-fragment | NA | 21.72 | 0     |
| S12_k141_89485                              | 2106  | No  | NA | 0    | 1 | Not-determined | Genome-fragment | NA |       | 0     |
| S12_k141_391336                             | 41614 | No  | NA | 0    | 9 | Not-determined | Genome-fragment | NA |       | 0     |
| S12_k141_122669                             | 1255  | No  | NA | 0    | 0 | Not-determined | Genome-fragment | NA |       | 0     |
| S12_k141_5876                               | 3778  | No  | NA | 0    | 1 | Not-determined | Genome-fragment | NA |       | 0     |
| S2-final-viral-combined_k141_13200[full]    | 3356  | No  | NA | 1    | 0 | Low-quality    | Genome-fragment | NA | 3.9   | 0     |
| S12_k141_22953                              | 3282  | No  | NA | 0    | 2 | Not-determined | Genome-fragment | NA |       | 0     |
| S12_k141_356711                             | 1179  | No  | NA | 0    | 0 | Not-determined | Genome-fragment | NA |       | 0     |
| S12_k141_306201                             | 1364  | No  | NA | 0    | 0 | Not-determined | Genome-fragment | NA |       | 0     |
| S12_k141_296922                             | 1112  | No  | NA | 0    | 0 | Not-determined | Genome-fragment | NA |       | 0     |
| S12_k141_391426                             | 2079  | No  | NA | 0    | 0 | Not-determined | Genome-fragment | NA |       | 0     |
| S12_k141_5966                               | 2612  | No  | NA | 0    | 2 | Not-determined | Genome-fragment | NA |       | 0     |
| S4-final-viral-combined_k141_41039[full]    | 3356  | Yes | NA | 1    | 1 | Low-quality    | Genome-fragment | NA | 2.53  | 43.06 |
| S12_k141_256952                             | 1055  | No  | NA | 0    | 1 | Not-determined | Genome-fragment | NA |       | 0     |
| S12_k141_340348                             | 2570  | No  | NA | 0    | 2 | Not-determined | Genome-fragment | NA |       | 0     |
| S8_k141_216736                              | 2356  | No  | NA | 0    | 4 | Low-quality    | Genome-fragment | NA | 2.61  | 0     |
| S12_k141_273987                             | 1695  | No  | NA | 0    | 0 | Not-determined | Genome-fragment | NA |       | 0     |
| S12_k141_106401                             | 3422  | No  | NA | 0    | 1 | Not-determined | Genome-fragment | NA |       | 0     |
| S12_k141_391455                             | 1149  | No  | NA | 0    | 1 | Not-determined | Genome-fragment | NA |       | 0     |
| S12_k141_106412                             | 1005  | No  | NA | 0    | 1 | Not-determined | Genome-fragment | NA |       | 0     |
| S12_k141_356798                             | 1290  | No  | NA | 0    | 0 | Not-determined | Genome-fragment | NA |       | 0     |
| S4_k141_147206                              | 3357  | No  | NA | 0    | 2 | Low-quality    | Genome-fragment | NA | 6.85  | 0     |
| S12_k141_279881                             | 1376  | No  | NA | 0    | 0 | Not-determined | Genome-fragment | NA |       | 0     |
| S12_k141_356816                             | 2593  | No  | NA | 0    | 0 | Not-determined | Genome-fragment | NA |       | 0     |
| S8-final-viral-combined_k141_140574[full]   | 3357  | Yes | NA | 1    | 2 | Low-quality    | Genome-fragment | NA | 0.72  | 58.65 |
| S12_k141_271882                             | 3358  | No  | NA | 1388 | 0 | Low-quality    | Genome-fragment | NA | 10.17 | 0     |
| S12_k141_374725                             | 1205  | No  | NA | 0    | 0 | Not-determined | Genome-fragment | NA |       | 0     |
| S2-final-viral-combined_k141_131149[full]   | 3358  | No  | NA | 1    | 0 | Low-quality    | Genome-fragment | NA | 7.92  | 0     |
| S12_k141_373608                             | 21222 | No  | NA | 16   | 1 | Not-determined | Genome-fragment | NA |       | 0     |
| S12_k141_257004                             | 3836  | No  | NA | 0    | 1 | Not-determined | Genome-fragment | NA |       | 0     |
| S12_k141_324563                             | 1042  | No  | NA | 0    | 1 | Not-determined | Genome-fragment | NA |       | 0     |
| S12_k141_6077                               | 1074  | No  | NA | 0    | 1 | Not-determined | Genome-fragment | NA |       | 0     |
| S12_k141_340417                             | 1386  | No  | NA | 0    | 1 | Not-determined | Genome-fragment | NA |       | 0     |
| S12_k141_324569                             | 8406  | No  | NA | 0    | 2 | Not-determined | Genome-fragment | NA |       | 0     |
| S12_k141_191239                             | 1124  | No  | NA | 0    | 1 | Not-determined | Genome-fragment | NA |       | 0     |
| S11-final-viral-combined_k141_209501[full]  | 3359  | No  | NA | 0    | 0 | Low-quality    | Genome-fragment | NA | 5.83  | 0     |
| S12_k141_206962                             | 3897  | No  | NA | 0    | 3 | Not-determined | Genome-fragment | NA |       | 0     |
| S12_k141_73923                              | 14119 | No  | NA | 0    | 9 | Not-determined | Genome-fragment | NA |       | 0     |
| S12_k141_191264                             | 1121  | No  | NA | 0    | 2 | Not-determined | Genome-fragment | NA |       | 0     |
| S12_k141_122809                             | 1159  | No  | NA | 0    | 1 | Not-determined | Genome-fragment | NA |       | 0     |
| S17-final-viral-combined_k141_78377[full]   | 3359  | No  | NA | 6    | 0 | Low-quality    | Genome-fragment | NA | 4.08  | 0     |
| S12_k141_178617                             | 3110  | No  | NA | 0    | 2 | Not-determined | Genome-fragment | NA |       | 0     |
| S12_k141_40088                              | 2455  | No  | NA | 0    | 3 | Not-determined | Genome-fragment | NA |       | 0     |
| S12_k141_122839                             | 1521  | No  | NA | 0    | 1 | Not-determined | Genome-fragment | NA |       | 0     |
| S12-final-viral-combined_k141_314679[full]  | 3360  | Yes | NA | 1574 | 2 | Low-quality    | Genome-fragment | NA | 5.49  | 53.15 |
| S12_k141_118706                             | 3360  | No  | NA | 2    | 0 | Low-quality    | Genome-fragment | NA | 6.02  | 0     |
| S12_k141_207006                             | 1089  | No  | NA | 0    | 0 | Not-determined | Genome-fragment | NA |       | 0     |
| S11-final-viral-combined_k141_308448[full]  | 3361  | No  | NA | 0    | 1 | Low-quality    | Genome-fragment | NA | 3.16  | 0     |
| S12_k141_157140                             | 3638  | No  | NA | 0    | 2 | Not-determined | Genome-fragment | NA |       | 0     |
| S17-final-viral-combined_k141_89666[full]   | 3361  | No  | NA | 2    | 0 | Low-quality    | Genome-fragment | NA | 7.8   | 0     |
| S12_k141_140397                             | 1351  | No  | NA | 0    | 0 | Not-determined | Genome-fragment | NA |       | 0     |
| S12_k141_89331                              | 3096  | No  | NA | 0    | 3 | Not-determined | Genome-fragment | NA |       | 0     |
| S12_k141_212307                             | 1048  | No  | NA | 0    | 3 | Not-determined | Genome-fragment | NA |       | 0     |
| S12_k141_6158                               | 3661  | No  | NA | 0    | 3 | Not-determined | Genome-fragment | NA |       | 0     |
| S12_k141_240789                             | 1428  | No  | NA | 0    | 0 | Not-determined | Genome-fragment | NA |       | 0     |
| S9_k141_95593                               | 3362  | No  | NA | 1    | 0 | Low-quality    | Genome-fragment | NA | 9.19  | 0     |
| S12_k141_122897                             | 1030  | No  | NA | 0    | 1 | Not-determined | Genome-fragment | NA |       | 0     |
| S12_k141_308493                             | 1062  | No  | NA | 0    | 0 | Not-determined | Genome-fragment | NA |       | 0     |
| S12_k141_212965                             | 3552  | No  | NA | 0    | 2 | Not-determined | Genome-fragment | NA |       | 0     |
| S12_k141_274202                             | 1046  | No  | NA | 0    | 1 | Not-determined | Genome-fragment | NA |       | 0     |
| S2-final-viral-combined_k141_172827[full]   | 3362  | No  | NA | 0    | 0 | Low-quality    | Genome-fragment | NA | 7.24  | 0     |
| S9_k141_12154                               | 3363  | No  | NA | 3    | 0 | Low-quality    | Genome-fragment | NA | 8.35  | 0     |
| S12_k141_340619                             | 1013  | No  | NA | 0    | 2 | Not-determined | Genome-fragment | NA |       | 0     |
| S11-final-viral-combined_k141_226613[full]  | 3363  | No  | NA | 0    | 0 | Low-quality    | Genome-fragment | NA | 8.29  | 0     |
| S9-final-viral-combined_k141_36222[full]    | 3364  | No  | NA | 0    | 1 | Low-quality    | Genome-fragment | NA | 4.16  | 0     |
| S12_k141_391699                             | 1041  | No  | NA | 0    | 0 | Not-determined | Genome-fragment | NA |       | 0     |
| S12_k141_207152                             | 3176  | No  | NA | 0    | 1 | Not-determined | Genome-fragment | NA |       | 0     |
| S12_k141_207154                             | 1585  | No  | NA | 0    | 1 | Not-determined | Genome-fragment | NA |       | 0     |
| S12_k141_214040                             | 1755  | No  | NA | 0    | 0 | Not-determined | Genome-fragment | NA |       | 0     |
| S11-final-viral-combined_k141_307756[full]  | 3364  | No  | NA | 4    | 0 | Low-quality    | Genome-fragment | NA | 5.78  | 0     |
| S12_k141_257265                             | 1183  | No  | NA | 0    | 2 | Not-determined | Genome-fragment | NA |       | 0     |
| S12_k141_6277                               | 5134  | No  | NA | 0    | 1 | Not-determined | Genome-fragment | NA |       | 0     |
| S5-final-viral-combined_k141_105097[full]   | 3364  | No  | NA | 0    | 0 | Low-quality    | Genome-fragment | NA | 2.35  | 0     |
| S12_k141_224095                             | 3835  | No  | NA | 0    | 0 | Not-determined | Genome-fragment | NA |       | 0     |
| S12_k141_157270                             | 8538  | No  | NA | 0    | 8 | Not-determined | Genome-fragment | NA |       | 0     |
| S12_k141_40023                              | 1200  | No  | NA | 0    | 1 | Not-determined | Genome-fragment | NA |       | 0     |
| S12_k141_340665                             | 1462  | No  | NA | 0    | 1 | Not-determined | Genome-fragment | NA |       | 0     |
| S12_k141_74154                              | 1542  | No  | NA | 0    | 0 | Not-determined | Genome-fragment | NA |       | 0     |
| S12_k141_6153                               | 1481  | No  | NA | 0    | 0 | Not-determined | Genome-fragment | NA |       | 0     |
| S12_k141_324825                             | 1256  | No  | NA | 0    | 1 | Not-determined | Genome-fragment | NA |       | 0     |
| S9-final-viral-combined_k141_78014[full]    | 3365  | No  | NA | 0    | 2 | Low-quality    | Genome-fragment | NA | 5.93  | 0     |
| S12_k141_207240                             | 3121  | No  | NA | 0    | 0 | Not-determined | Genome-fragment | NA |       | 0     |
| S12_k141_257306                             | 3559  | No  | NA | 0    | 2 | Not-determined | Genome-fragment | NA |       | 0     |
| S12_k141_40277                              | 1080  | No  | NA | 0    | 0 | Not-determined | Genome-fragment | NA |       | 0     |
| S8_k141_188879                              | 3365  | No  | NA | 0    | 0 | Low-quality    | Genome-fragment | NA | 5.95  | 0     |
| S12_k141_140549                             | 3536  | No  | NA | 0    | 1 | Not-determined | Genome-fragment | NA |       | 0     |
| S12_k141_123040                             | 1065  | No  | NA | 0    | 0 | Not-determined | Genome-fragment | NA |       | 0     |
| S12_k141_106711                             | 1257  | No  | NA | 0    | 1 | Not-determined | Genome-fragment | NA |       | 0     |
| S12_k141_90134                              | 1055  | No  | NA | 0    | 0 | Not-determined | Genome-fragment | NA |       | 0     |
| S1_k141_266011                              | 3366  | No  | NA | 0    | 1 | Low-quality    | Genome-fragment | NA | 11.67 | 0     |
| S12_k141_274336                             | 1361  | No  | NA | 0    | 1 | Not-determined | Genome-fragment | NA |       | 0     |
| S12_k141_375035                             | 1621  | No  | NA | 0    | 2 | Not-determined | Genome-fragment | NA |       | 0     |
| S12_k141_207323                             | 5357  | No  | NA | 0    | 5 | Not-determined | Genome-fragment | NA |       | 0     |
| S12_k141_90159                              | 6100  | No  | NA | 0    | 0 | Not-determined | Genome-fragment | NA |       | 0     |
| S12_k141_391841                             | 1029  | No  | NA | 0    | 1 | Not-determined | Genome-fragment | NA |       | 0     |
| S12_k141_6452                               | 2433  | No  | NA | 0    | 1 | Not-determined | Genome-fragment | NA |       | 0     |
| S7-final-viral-combined_k141_96391[full]    | 3366  | No  | NA | 0    | 2 | Low-quality    | Genome-fragment | NA | 1.02  | 0     |
| S12_k141_257374                             | 7852  | No  | NA | 0    | 5 | Not-determined | Genome-fragment | NA |       | 0     |
| S12_k141_375080                             | 1022  | No  | NA | 0    | 1 | Not-determined | Genome-fragment | NA |       | 0     |
| S12_k141_140579                             | 3315  | No  | NA | 0    | 4 | Not-determined | Genome-fragment | NA |       | 0     |
| S12_k141_40394                              | 2659  | No  | NA | 0    | 1 | Not-determined | Genome-fragment | NA |       | 0     |
| S1_k141                                     |       |     |    |      |   |                |                 |    |       |       |



|                                             |          |      |   |    |                |                 |       |       |  |
|---------------------------------------------|----------|------|---|----|----------------|-----------------|-------|-------|--|
| S12_k141_140751                             | 6391 No  | NA   | 0 | 4  | Not-determined | Genome-fragment | NA    | 0     |  |
| S17-final-viral-combined_k141_6586  i12gene | 3369 No  | NA   | 1 | 0  | Low-quality    | Genome-fragment | 8.91  | 0     |  |
| S12_k141_106947                             | 3334 No  | NA   | 0 | 1  | Not-determined | Genome-fragment | NA    | 0     |  |
| S12_k141_40568                              | 1366 No  | NA   | 0 | 1  | Not-determined | Genome-fragment | NA    | 0     |  |
| S12_k141_340947                             | 1295 No  | NA   | 0 | 2  | Not-determined | Genome-fragment | NA    | 0     |  |
| S12_k141_157667                             | 2465 No  | NA   | 0 | 1  | Not-determined | Genome-fragment | NA    | 0     |  |
| S12_k141_174095                             | 1041 No  | NA   | 0 | 1  | Not-determined | Genome-fragment | NA    | 0     |  |
| S11_k141_153239                             | 3371 No  | NA   | 0 | 4  | Low-quality    | Genome-fragment | 1.25  | 0     |  |
| S12_k141_274598                             | 2150 No  | NA   | 0 | 1  | Not-determined | Genome-fragment | NA    | 0     |  |
| S12_k141_90400                              | 10601 No | NA   | 0 | 4  | Not-determined | Genome-fragment | NA    | 0     |  |
| S3-final-viral-combined_k141_82376  full    | 3372 No  | NA   | 0 | 2  | Low-quality    | Genome-fragment | 2.24  | 0     |  |
| S6_k141_59020                               | 3372 No  | NA   | 0 | 4  | Low-quality    | Genome-fragment | 28.25 | 0     |  |
| S6-final-viral-combined_k141_81283  full    | 3373 No  | NA   | 0 | 2  | Low-quality    | Genome-fragment | 1.92  | 0     |  |
| S12_k141_274616                             | 3459 No  | NA   | 0 | 1  | Not-determined | Genome-fragment | NA    | 0     |  |
| S8_k141_231632                              | 3373 No  | NA   | 0 | 3  | Low-quality    | Genome-fragment | 5.68  | 0     |  |
| S11-final-viral-combined_k141_47927  full   | 3374 No  | NA   | 0 | 0  | Low-quality    | Genome-fragment | 2.05  | 0     |  |
| S17-final-viral-combined_k141_14950  full   | 3374 No  | NA   | 1 | 0  | Low-quality    | Genome-fragment | 5.11  | 0     |  |
| S12_k141_106988                             | 1265 No  | NA   | 0 | 1  | Not-determined | Genome-fragment | NA    | 0     |  |
| S12_k141_265650                             | 3374 No  | NA   | 0 | 2  | Low-quality    | Genome-fragment | 1.82  | 0     |  |
| S2-final-viral-combined_k141_45243  full    | 3374 No  | NA   | 1 | 0  | Low-quality    | Genome-fragment | 9.09  | 0     |  |
| S12_k141_274654                             | 1204 No  | NA   | 0 | 1  | Not-determined | Genome-fragment | NA    | 0     |  |
| S1-final-viral-combined_k141_172801  full   | 3375 No  | NA   | 0 | 1  | Not-determined | Genome-fragment | 1.91  | 0     |  |
| S12_k141_308946                             | 3278 No  | NA   | 0 | 1  | Not-determined | Genome-fragment | NA    | 0     |  |
| S12_k141_292015                             | 2034 No  | NA   | 0 | 1  | Not-determined | Genome-fragment | NA    | 0     |  |
| S12-final-viral-combined_k141_334664  full  | 3375 No  | NA   | 0 | 3  | Low-quality    | Genome-fragment | 1.69  | 0     |  |
| S12_k141_292021                             | 1324 No  | NA   | 0 | 0  | Not-determined | Genome-fragment | NA    | 0     |  |
| S9-final-viral-combined_k141_90144  full    | 3377 No  | NA   | 3 | 0  | Low-quality    | Genome-fragment | 7.03  | 0     |  |
| S12_k141_6645                               | 1685 No  | NA   | 0 | 1  | Not-determined | Genome-fragment | NA    | 0     |  |
| S1-final-viral-combined_k141_65480  full    | 3377 No  | NA   | 1 | 0  | Low-quality    | Genome-fragment | 8.06  | 0     |  |
| S12_k141_123350                             | 8783 No  | NA   | 0 | 2  | Not-determined | Genome-fragment | NA    | 0     |  |
| S12_k141_308976                             | 1196 No  | NA   | 0 | 1  | Not-determined | Genome-fragment | NA    | 0     |  |
| S17-final-viral-combined_k141_210687  full  | 3377 No  | NA   | 0 | 0  | Low-quality    | Genome-fragment | 26.1  | 0     |  |
| S12_k141_257715                             | 1768 No  | NA   | 0 | 2  | Not-determined | Genome-fragment | NA    | 0     |  |
| S12_k141_309003                             | 1109 No  | NA   | 0 | 1  | Not-determined | Genome-fragment | NA    | 0     |  |
| S12_k141_107049                             | 2360 No  | NA   | 0 | 1  | Not-determined | Genome-fragment | NA    | 0     |  |
| S12_k141_3090214                            | 3313 No  | NA   | 0 | 2  | Not-determined | Genome-fragment | NA    | 0     |  |
| S12_k141_56413                              | 1203 No  | NA   | 0 | 1  | Not-determined | Genome-fragment | NA    | 0     |  |
| S12_k141_140849                             | 1274 No  | NA   | 0 | 1  | Not-determined | Genome-fragment | NA    | 0     |  |
| S12_k141_291201                             | 1045 No  | NA   | 0 | 0  | Not-determined | Genome-fragment | NA    | 0     |  |
| S8_k141_213935                              | 3377 No  | NA   | 1 | 0  | Low-quality    | Genome-fragment | 1.63  | 0     |  |
| S12_k141_375338                             | 3323 No  | NA   | 0 | 2  | Not-determined | Genome-fragment | NA    | 0     |  |
| S7-final-viral-combined_k141_221549  full   | 3378 No  | NA   | 0 | 0  | Low-quality    | Genome-fragment | 7.44  | 0     |  |
| S12_k141_292178                             | 2094 No  | NA   | 0 | 0  | Not-determined | Genome-fragment | NA    | 0     |  |
| S12_k141_325196                             | 33104 No | NA   | 0 | 43 | Not-determined | Genome-fragment | NA    | 0     |  |
| S12-final-viral-combined_k141_352399  full  | 3378 No  | NA   | 0 | 1  | Low-quality    | Genome-fragment | 3.57  | 0     |  |
| S12_k141_224621                             | 3865 No  | NA   | 0 | 0  | Not-determined | Genome-fragment | NA    | 0     |  |
| S12_k141_257861                             | 1311 No  | NA   | 0 | 2  | Not-determined | Genome-fragment | NA    | 0     |  |
| S9-final-viral-combined_k141_106874  full   | 3379 No  | NA   | 0 | 1  | Low-quality    | Genome-fragment | 9.35  | 0     |  |
| S12_k141_90560                              | 4444 No  | NA   | 0 | 0  | Not-determined | Genome-fragment | NA    | 0     |  |
| S9_k141_111592                              | 3379 No  | NA   | 0 | 3  | Low-quality    | Genome-fragment | 3.17  | 0     |  |
| S12_k141_325254                             | 1326 No  | NA   | 0 | 1  | Not-determined | Genome-fragment | NA    | 0     |  |
| S12_k141_40682                              | 1052 No  | NA   | 0 | 0  | Not-determined | Genome-fragment | NA    | 0     |  |
| S12_k141_375382                             | 4383 No  | NA   | 0 | 2  | Not-determined | Genome-fragment | NA    | 0     |  |
| S12_k141_325278                             | 1013 No  | NA   | 0 | 0  | Not-determined | Genome-fragment | NA    | 0     |  |
| S12_k141_392296                             | 3389 No  | NA   | 0 | 2  | Not-determined | Genome-fragment | NA    | 0     |  |
| S12_k141_274871                             | 9412 No  | NA   | 0 | 4  | Not-determined | Genome-fragment | NA    | 0     |  |
| S12_k141_123557                             | 3776 No  | NA   | 0 | 2  | Not-determined | Genome-fragment | NA    | 0     |  |
| S12_k141_224617                             | 1066 No  | NA   | 0 | 2  | Not-determined | Genome-fragment | NA    | 0     |  |
| S12_k141_332926                             | 1504 No  | NA   | 0 | 0  | Not-determined | Genome-fragment | NA    | 0     |  |
| S12_k141_325298                             | 1317 No  | NA   | 0 | 0  | Not-determined | Genome-fragment | NA    | 0     |  |
| S12_k141_6816                               | 1315 No  | NA   | 0 | 1  | Not-determined | Genome-fragment | NA    | 0     |  |
| S17-final-viral-combined_k141_9676  full    | 3379 No  | NA   | 1 | 1  | Low-quality    | Genome-fragment | 8.95  | 0     |  |
| S12_k141_158006                             | 7821 No  | NA   | 0 | 1  | Not-determined | Genome-fragment | NA    | 0     |  |
| S12_k141_140960                             | 1236 No  | NA   | 0 | 1  | Not-determined | Genome-fragment | NA    | 0     |  |
| S12_k141_191889                             | 1350 No  | NA   | 0 | 1  | Not-determined | Genome-fragment | NA    | 0     |  |
| S12_k141_309105                             | 1034 No  | NA   | 0 | 1  | Not-determined | Genome-fragment | NA    | 0     |  |
| S12_k141_56629                              | 1296 No  | NA   | 0 | 0  | Not-determined | Genome-fragment | NA    | 0     |  |
| S17-k141_40755                              | 3379 No  | NA   | 0 | 0  | Low-quality    | Genome-fragment | 8.01  | 0     |  |
| S12_k141_375520                             | 1391 No  | NA   | 0 | 0  | Not-determined | Genome-fragment | NA    | 0     |  |
| S11-final-viral-combined_k141_253202  full  | 3380 No  | NA   | 0 | 3  | Low-quality    | Genome-fragment | 3.23  | 0     |  |
| S12_k141_6902                               | 1059 No  | NA   | 0 | 1  | Not-determined | Genome-fragment | NA    | 0     |  |
| S12-final-viral-combined_k141_232386  full  | 3380 No  | NA   | 0 | 3  | Low-quality    | Genome-fragment | 1.78  | 0     |  |
| S12_k141_224706                             | 6653 No  | NA   | 0 | 0  | Not-determined | Genome-fragment | NA    | 0     |  |
| S12_k141_141035                             | 1194 No  | NA   | 0 | 1  | Not-determined | Genome-fragment | NA    | 0     |  |
| S12_k141_56694                              | 3362 No  | NA   | 0 | 2  | Not-determined | Genome-fragment | NA    | 0     |  |
| S12_k141_241388                             | 1070 No  | NA   | 0 | 1  | Not-determined | Genome-fragment | NA    | 0     |  |
| S12_k141_191928                             | 1007 No  | NA   | 0 | 0  | Not-determined | Genome-fragment | NA    | 0     |  |
| S12_k141_6935                               | 1140 No  | NA   | 0 | 0  | Not-determined | Genome-fragment | NA    | 0     |  |
| S9-final-viral-combined_k141_89018  full    | 3381 Yes | 2273 | 1 | 1  | Low-quality    | Genome-fragment | 1.15  | 31.77 |  |
| S12_k141_392438                             | 1373 No  | NA   | 0 | 2  | Not-determined | Genome-fragment | NA    | 0     |  |
| S12_k141_123724                             | 1428 No  | NA   | 0 | 1  | Not-determined | Genome-fragment | NA    | 0     |  |
| S12_k141_207881                             | 1360 No  | NA   | 0 | 1  | Not-determined | Genome-fragment | NA    | 0     |  |
| S12_k141_74688                              | 3461 No  | NA   | 0 | 4  | Not-determined | Genome-fragment | NA    | 0     |  |
| S1_k141_106138                              | 3381 No  | NA   | 0 | 0  | Low-quality    | Genome-fragment | 7.4   | 0     |  |
| S12_k141_6957                               | 12349 No | NA   | 0 | 24 | Not-determined | Genome-fragment | NA    | 0     |  |
| S17-k141_120196                             | 3381 No  | NA   | 3 | 0  | Low-quality    | Genome-fragment | 9.08  | 0     |  |
| S12_k141_357777                             | 2308 No  | NA   | 0 | 2  | Not-determined | Genome-fragment | NA    | 0     |  |
| S12_k141_90571                              | 1169 No  | NA   | 0 | 1  | Not-determined | Genome-fragment | NA    | 0     |  |
| S12_k141_315423                             | 1153 No  | NA   | 0 | 2  | Not-determined | Genome-fragment | NA    | 0     |  |
| S12_k141_141109                             | 4948 No  | NA   | 0 | 13 | Not-determined | Genome-fragment | NA    | 0     |  |
| S12_k141_241504                             | 1365 No  | NA   | 0 | 1  | Not-determined | Genome-fragment | NA    | 0     |  |
| S12_k141_141116                             | 1067 No  | NA   | 0 | 1  | Not-determined | Genome-fragment | NA    | 0     |  |
| S12_k141_74763                              | 1563 No  | NA   | 0 | 0  | Not-determined | Genome-fragment | NA    | 0     |  |
| S12_k141_275049                             | 1573 No  | NA   | 0 | 2  | Not-determined | Genome-fragment | NA    | 0     |  |
| S12_k141_141122                             | 1302 No  | NA   | 0 | 2  | Not-determined | Genome-fragment | NA    | 0     |  |
| S12_k141_307997                             | 3381 No  | NA   | 0 | 0  | Low-quality    | Genome-fragment | 5.06  | 0     |  |
| S12_k141_158163                             | 2024 No  | NA   | 0 | 0  | Not-determined | Genome-fragment | NA    | 0     |  |
| S12_k141_174414                             | 1976 No  | NA   | 0 | 3  | Not-determined | Genome-fragment | NA    | 0     |  |
| S6_k141_108151                              | 3381 No  | NA   | 3 | 0  | Low-quality    | Genome-fragment | 8.17  | 0     |  |
| S8_k141_76328                               | 3382 No  | NA   | 0 | 3  | Low-quality    | Genome-fragment | 3.65  | 0     |  |
| S12_k141_224854                             | 7698 No  | NA   | 0 | 0  | Not-determined | Genome-fragment | NA    | 0     |  |
| S12_k141_56840                              | 1017 No  | NA   | 0 | 1  | Not-determined | Genome-fragment | NA    | 0     |  |
| S12_k141_275125                             | 1394 No  | NA   | 0 | 0  | Not-determined | Genome-fragment | NA    | 0     |  |
| S12_k141_325468                             | 1634 No  | NA   | 0 | 0  | Not-determined | Genome-fragment | NA    | 0     |  |
| S1_k141_276180                              | 3383 No  | NA   | 0 | 1  | Low-quality    | Genome-fragment | 3.01  | 0     |  |
| S12_k141_392475                             | 6343 No  | NA   | 0 | 4  | Not-determined | Genome-fragment | NA    | 0     |  |
| S12_k141_23926                              | 1677 No  | NA   | 0 | 4  | Not-determined | Genome-fragment | NA    | 0     |  |
| S12_k141_56880                              | 7814 No  | NA   | 0 | 3  | Not-determined | Genome-fragment | NA    | 0     |  |
| S12_k141_357807                             | 1078 No  | NA   | 0 | 2  | Not-determined | Genome-fragment | NA    | 0     |  |
| S1_k141_161293                              | 3383 No  | NA   | 0 | 0  | Low-quality    | Genome-fragment | 7.31  | 0     |  |
| S12_k141_341447                             | 1746 No  | NA   | 0 | 1  | Not-determined | Genome-fragment | NA    | 0     |  |
| S12_k141_357923                             | 1618 No  | NA   | 0 | 1  | Not-determined | Genome-fragment | NA    | 0     |  |
| S12_k141_107443                             | 1417 No  | NA   | 0 | 0  | Not-determined | Genome-fragment | NA    | 0     |  |
| S12_k141_325542                             | 1356 No  | NA   | 0 | 1  | Not-determined | Genome-fragment | NA    | 0     |  |
| S12_k141_392597                             | 2656 No  | NA   | 0 | 0  | Not-determined | Genome-fragment | NA    | 0     |  |
| S12_k141_309432                             | 1012 No  | NA   | 0 | 0  | Not-determined | Genome-fragment | NA    | 0     |  |
| S5-final-viral-combined_k141_172356  full   | 3383 No  | NA   | 3 | 0  | Low-quality    | Genome-fragment | 4.85  | 0     |  |
| S12_k141_41054                              | 4096 No  | NA   | 0 | 2  | Not-determined | Genome-fragment | NA    | 0     |  |
| S12_k141_141260                             | 1588 No  | NA   | 0 | 2  | Not-determined | Genome-fragment | NA    | 0     |  |
| S12_k141_174575                             | 1641 No  | NA   | 0 | 1  | Not-determined | Genome-fragment | NA    | 0     |  |
| S12_k141_90484                              | 4489 No  | NA   | 0 | 0  | Not-determined | Genome-fragment | NA    | 0     |  |
| S5-final-viral-combined_k141_168820  full   | 3383 No  | NA   | 0 | 1  | Low-quality    | Genome-fragment | 0.99  | 0     |  |
| S12_k141_258219                             | 3462 No  | NA   | 0 | 0  | Not-determined | Genome-fragment | NA    | 0     |  |
| S7_k141_244589                              | 3383 Yes | 2036 | 1 | 1  | Low-quality    | Genome-fragment | 2.57  | 39.82 |  |
| S12_k141_341552                             | 2570 No  | NA   | 0 | 0  | Not-determined | Genome-fragment | NA    | 0     |  |
| S12_k141_375880                             | 2381 No  | NA   | 0 | 0  | Not-determined | Genome-fragment | NA    | 0     |  |
| S12_k141_258249                             | 1113 No  | NA   | 0 | 0  | Not-determined | Genome-fragment | NA    | 0     |  |
| S12-final-viral-combined_k141_99880  full   | 3384 No  | NA   | 0 | 0  | Low-quality    | Genome-fragment | 10.47 | 0     |  |
| S12_k141_375884                             | 2364 No  | NA   | 0 | 3  | Not-determined | Genome-fragment | NA    | 0     |  |
| S12_k141_375892                             | 2504 No  | NA   | 0 | 0  | Not-determined | Genome-fragment | NA    | 0     |  |
| S12-final-viral-combined_k141_301129  full  | 3384 No  | NA   | 0 | 3  | Low-quality    | Genome-fragment | 2.79  | 0     |  |
| S12_k141_375903                             | 1568 No  | NA   | 0 | 0  | Not-determined | Genome-fragment | NA    | 0     |  |
| S9-final-viral-combined_k141_26272  full    | 3385 No  | NA   | 0 | 0  | Low-quality    | Genome-fragment | 5.34  | 0     |  |
| S12-final-viral-combined_k141_213644  full  | 3386 Yes | 2126 | 1 | 1  | Low-quality    | Genome-fragment | 2.91  | 37.21 |  |
| S12_k141_158476                             | 1022 No  | NA   | 0 | 1  | Not-determined | Genome-fragment | NA    | 0     |  |
| S12_k141_123897                             | 2185 No  | NA   | 0 | 0  | Not-determined | Genome-fragment | NA    | 0     |  |
| S12_k141_74987                              | 4724 No  | NA   | 0 | 4  | Not-determined | Genome-fragment | NA    | 0     |  |
| S12_k141_325743                             | 1414 No  | NA   | 0 | 0  | Not-determined | Genome-fragment | NA    | 0     |  |
| S12_k141_341642                             | 1031 No  | NA   | 0 | 1  | Not-determined | Genome-fragment | NA    | 0     |  |
| S12_k141_57089                              | 3436 No  | NA   | 0 | 0  | Not-determined | Genome-fragment | NA    | 0     |  |
| S8-final-viral-combined_k141_51393  full    | 3386 No  | NA   | 0 | 0  | Low-quality    | Genome-fragment | 9.2   | 0     |  |
| S12_k141_90788                              | 7016 No  | NA   | 0 | 6  | Not-determined | Genome-fragment | NA    | 0     |  |
| S12_k141_375959                             | 1480 No  | NA   | 0 | 0  | Not-determined | Genome-fragment | NA    | 0     |  |
| S2-final-viral-combined_k141_68735  full    | 3387 No  | NA   | 1 | 0  | Low-quality    | Genome-fragment | 6.06  | 0     |  |
| S12_k1                                      |          |      |   |    |                |                 |       |       |  |



|                                             |       |     |      |   |                |                 |                 |                 |       |
|---------------------------------------------|-------|-----|------|---|----------------|-----------------|-----------------|-----------------|-------|
| S12_k141_392854                             | 1094  | No  | NA   | 0 | 2              | Not-determined  | Genome-fragment | NA              | 0     |
| S12_k141_392867                             | 3032  | No  | NA   | 0 | 0              | Not-determined  | Genome-fragment | NA              | 0     |
| S12_k141_292698                             | 1453  | No  | NA   | 0 | 0              | Not-determined  | Genome-fragment | NA              | 0     |
| S12_k141_141649                             | 1704  | No  | NA   | 0 | 0              | Not-determined  | Genome-fragment | NA              | 0     |
| S12_k141_57303                              | 1018  | No  | NA   | 0 | 0              | 2               | Not-determined  | Genome-fragment | NA    |
| S12_k141_34337                              | 3815  | No  | NA   | 0 | 1              | Not-determined  | Genome-fragment | NA              | 0     |
| S12_k141_325902                             | 1201  | No  | NA   | 0 | 0              | 0               | Not-determined  | Genome-fragment | NA    |
| S7-final-viral-combined_k141_19685}[112gene | 3392  | No  | NA   | 1 | 0              | Low-quality     | Genome-fragment | NA              | 6.42  |
| S7-final-viral-combined_k141_1431}[full     | 3392  | No  | NA   | 1 | 0              | Low-quality     | Genome-fragment | NA              | 11.07 |
| S2-final-viral-combined_k141_136097}[full   | 3392  | No  | NA   | 0 | 2              | Low-quality     | Genome-fragment | NA              | 5.2   |
| S12_k141_292759                             | 1160  | No  | NA   | 0 | 1              | Not-determined  | Genome-fragment | NA              | 0     |
| S12_k141_174797                             | 34150 | No  | NA   | 0 | 4              | Not-determined  | Genome-fragment | NA              | 0     |
| S12_k141_57327                              | 3344  | No  | NA   | 0 | 1              | Not-determined  | Genome-fragment | NA              | 0     |
| S9-final-viral-combined_k141_17742}[full    | 3393  | No  | NA   | 0 | 0              | Low-quality     | Genome-fragment | NA              | 5.38  |
| S12_k141_41362                              | 1954  | No  | NA   | 0 | 1              | Not-determined  | Genome-fragment | NA              | 0     |
| S12_k141_41367                              | 1255  | No  | NA   | 1 | Not-determined | Genome-fragment | NA              | 0               |       |
| S17-final-viral-combined_k141_197657}[full  | 3393  | No  | NA   | 0 | 2              | Low-quality     | Genome-fragment | NA              | 2.98  |
| S12_k141_41373                              | 1039  | No  | NA   | 0 | 0              | Not-determined  | Genome-fragment | NA              | 0     |
| S12_k141_292791                             | 1032  | No  | NA   | 0 | 2              | Not-determined  | Genome-fragment | NA              | 0     |
| S12_k141_107697                             | 3794  | No  | NA   | 0 | 3              | Not-determined  | Genome-fragment | NA              | 0     |
| S12_k141_225329                             | 1579  | No  | NA   | 0 | 1              | Not-determined  | Genome-fragment | NA              | 0     |
| S12_k141_275707                             | 3753  | No  | NA   | 0 | 7              | Not-determined  | Genome-fragment | NA              | 0     |
| S12_k141_91065                              | 1075  | No  | NA   | 0 | 1              | Not-determined  | Genome-fragment | NA              | 0     |
| S12_k141_57407                              | 3531  | No  | NA   | 0 | 1              | Not-determined  | Genome-fragment | NA              | 0     |
| S12_k141_174877                             | 1063  | No  | NA   | 0 | 1              | Not-determined  | Genome-fragment | NA              | 0     |
| S12_k141_7515                               | 7072  | No  | NA   | 0 | 2              | Not-determined  | Genome-fragment | NA              | 0     |
| S12_k141_275770                             | 9590  | No  | NA   | 0 | 2              | Not-determined  | Genome-fragment | NA              | 0     |
| S12_k141_376187                             | 1461  | No  | NA   | 0 | 0              | Not-determined  | Genome-fragment | NA              | 0     |
| S12_k141_275788                             | 9708  | No  | NA   | 0 | 5              | Not-determined  | Genome-fragment | NA              | 0     |
| S12_k141_139490                             | 3393  | No  | NA   | 0 | 3              | Low-quality     | Genome-fragment | NA              | 0.79  |
| S12_k141_208467                             | 3467  | No  | NA   | 0 | 1              | Not-determined  | Genome-fragment | NA              | 0     |
| S12_k141_192704                             | 1214  | No  | NA   | 0 | 0              | Not-determined  | Genome-fragment | NA              | 0     |
| S11_k141_238717                             | 3394  | No  | NA   | 6 | 0              | Low-quality     | Genome-fragment | NA              | 7.53  |
| S12_k141_275809                             | 4259  | No  | NA   | 0 | 1              | Not-determined  | Genome-fragment | NA              | 0     |
| S12_k141_343796                             | 3979  | No  | NA   | 0 | 1              | Not-determined  | Genome-fragment | NA              | 0     |
| S12_k141_258679                             | 1195  | No  | NA   | 0 | 1              | Not-determined  | Genome-fragment | NA              | 0     |
| S12_k141_393009                             | 1044  | No  | NA   | 0 | 1              | Not-determined  | Genome-fragment | NA              | 0     |
| S12-final-viral-combined_k141_118350}[full  | 3395  | No  | NA   | 0 | 1              | Low-quality     | Genome-fragment | NA              | 8.81  |
| S12_k141_310092                             | 1052  | No  | NA   | 0 | 0              | Not-determined  | Genome-fragment | NA              | 0     |
| S1_k141_210015                              | 3396  | No  | NA   | 1 | 0              | Low-quality     | Genome-fragment | NA              | 7.37  |
| S1_k141_44392                               | 3396  | No  | NA   | 3 | 0              | Low-quality     | Genome-fragment | NA              | 9.7   |
| S11_k141_243555                             | 2397  | No  | NA   | 0 | 0              | Low-quality     | Genome-fragment | NA              | 5.09  |
| S12_k141_393050                             | 6390  | No  | NA   | 0 | 2              | Not-determined  | Genome-fragment | NA              | 0     |
| S12_k141_275917                             | 1055  | No  | NA   | 0 | 1              | Not-determined  | Genome-fragment | NA              | 0     |
| S1-final-viral-combined_k141_195044}[full   | 3397  | No  | NA   | 0 | 2              | Low-quality     | Genome-fragment | NA              | 2.31  |
| S12_k141_316060                             | 3318  | No  | NA   | 0 | 1              | Not-determined  | Genome-fragment | NA              | 0     |
| S12_k141_141902                             | 1407  | No  | NA   | 0 | 1              | Not-determined  | Genome-fragment | NA              | 0     |
| S12_k141_7709                               | 1034  | No  | NA   | 0 | 1              | Not-determined  | Genome-fragment | NA              | 0     |
| S12_k141_342158                             | 1470  | No  | NA   | 0 | 1              | Not-determined  | Genome-fragment | NA              | 0     |
| S12_k141_276012                             | 1542  | No  | NA   | 0 | 0              | Not-determined  | Genome-fragment | NA              | 0     |
| S12_k141_258768                             | 1009  | No  | NA   | 0 | 0              | Not-determined  | Genome-fragment | NA              | 0     |
| S17-final-viral-combined_k141_130732}[full  | 2397  | Yes | 1191 | 0 | 2              | Low-quality     | Genome-fragment | NA              | 2.17  |
| S12_k141_158894                             | 1244  | No  | NA   | 1 | 0              | Not-determined  | Genome-fragment | NA              | 64.94 |
| S12_k141_91181                              | 1408  | No  | NA   | 0 | 1              | Not-determined  | Genome-fragment | NA              | 0     |
| S12_k141_234612                             | 1387  | No  | NA   | 0 | 1              | Not-determined  | Genome-fragment | NA              | 0     |
| S12_k141_342220                             | 1222  | No  | NA   | 0 | 2              | Not-determined  | Genome-fragment | NA              | 0     |
| S12_k141_310205                             | 1382  | No  | NA   | 0 | 1              | Not-determined  | Genome-fragment | NA              | 0     |
| S11-final-viral-combined_k141_106112}[full  | 3399  | No  | NA   | 1 | 0              | Low-quality     | Genome-fragment | NA              | 7.02  |
| S12_k141_326161                             | 2675  | No  | NA   | 0 | 0              | Not-determined  | Genome-fragment | NA              | 0     |
| S12_k141_7792                               | 1074  | No  | NA   | 0 | 0              | Not-determined  | Genome-fragment | NA              | 0     |
| S12_k141_276055                             | 1103  | No  | NA   | 0 | 1              | Not-determined  | Genome-fragment | NA              | 0     |
| S12_k141_275738                             | 1092  | No  | NA   | 0 | 0              | Not-determined  | Genome-fragment | NA              | 0     |
| S12_k141_393206                             | 5504  | No  | NA   | 0 | 7              | Not-determined  | Genome-fragment | NA              | 0     |
| S12_k141_225653                             | 1929  | No  | NA   | 0 | 1              | Not-determined  | Genome-fragment | NA              | 0     |
| S12_k141_142015                             | 1260  | No  | NA   | 0 | 1              | Not-determined  | Genome-fragment | NA              | 0     |
| S12_k141_242355                             | 1647  | No  | NA   | 0 | 0              | Not-determined  | Genome-fragment | NA              | 0     |
| S12_k141_326195                             | 1629  | No  | NA   | 0 | 2              | Not-determined  | Genome-fragment | NA              | 0     |
| S7_k141_37259                               | 3399  | No  | NA   | 0 | 0              | Low-quality     | Genome-fragment | NA              | 5.68  |
| S12_k141_7821                               | 8766  | No  | NA   | 0 | 0              | Not-determined  | Genome-fragment | NA              | 0     |
| S12_k141_326225                             | 1405  | No  | NA   | 0 | 1              | Not-determined  | Genome-fragment | NA              | 0     |
| S12_k141_142049                             | 1459  | No  | NA   | 0 | 0              | Not-determined  | Genome-fragment | NA              | 0     |
| S12_k141_193871                             | 1096  | No  | NA   | 0 | 0              | Not-determined  | Genome-fragment | NA              | 0     |
| S12_k141_310217                             | 2975  | No  | NA   | 0 | 5              | Not-determined  | Genome-fragment | NA              | 0     |
| S12_k141_158981                             | 1117  | No  | NA   | 0 | 1              | Not-determined  | Genome-fragment | NA              | 0     |
| S2-final-viral-combined_k141_159535}[full   | 3400  | No  | NA   | 0 | 0              | Low-quality     | Genome-fragment | NA              | 9.36  |
| S12_k141_326253                             | 2771  | No  | NA   | 0 | 0              | Not-determined  | Genome-fragment | NA              | 0     |
| S4_k141_62966                               | 3400  | No  | NA   | 0 | 0              | Low-quality     | Genome-fragment | NA              | 6.68  |
| S12_k141_57751                              | 1189  | No  | NA   | 0 | 0              | Not-determined  | Genome-fragment | NA              | 0     |
| S12_k141_34736                              | 2456  | No  | NA   | 0 | 1              | Not-determined  | Genome-fragment | NA              | 0     |
| S12_k141_258850                             | 1505  | No  | NA   | 0 | 2              | Not-determined  | Genome-fragment | NA              | 0     |
| S12_k141_342343                             | 2295  | No  | NA   | 0 | 0              | Not-determined  | Genome-fragment | NA              | 0     |
| S2-final-viral-combined_k141_53299}[full    | 3401  | No  | NA   | 0 | 2              | Low-quality     | Genome-fragment | NA              | 3.34  |
| S12_k141_124367                             | 1848  | No  | NA   | 0 | 0              | Not-determined  | Genome-fragment | NA              | 0     |
| S8-final-viral-combined_k141_8460}[full     | 3402  | No  | NA   | 0 | 0              | Low-quality     | Genome-fragment | NA              | 8.37  |
| S11_k141_260926                             | 3403  | No  | NA   | 0 | 1              | Low-quality     | Genome-fragment | NA              | 1.27  |
| S12_k141_192992                             | 5439  | No  | NA   | 0 | 3              | Not-determined  | Genome-fragment | NA              | 0     |
| S12_k141_383616                             | 3403  | No  | NA   | 2 | 0              | Low-quality     | Genome-fragment | NA              | 8.53  |
| S12_k141_91292                              | 1345  | No  | NA   | 0 | 1              | Not-determined  | Genome-fragment | NA              | 0     |
| S12_k141_358455                             | 1640  | No  | NA   | 0 | 0              | Not-determined  | Genome-fragment | NA              | 0     |
| S12_k141_142169                             | 1418  | No  | NA   | 0 | 0              | Not-determined  | Genome-fragment | NA              | 0     |
| S12_k141_175231                             | 1005  | No  | NA   | 0 | 0              | Not-determined  | Genome-fragment | NA              | 0     |
| S3-final-viral-combined_k141_122558}[full   | 3403  | No  | NA   | 0 | 1              | Low-quality     | Genome-fragment | NA              | 2.81  |
| S12_k141_393345                             | 1013  | No  | NA   | 0 | 1              | Not-determined  | Genome-fragment | NA              | 0     |
| S12_k141_242512                             | 4514  | No  | NA   | 0 | 0              | Not-determined  | Genome-fragment | NA              | 0     |
| S12_k141_91326                              | 1609  | No  | NA   | 0 | 4              | Not-determined  | Genome-fragment | NA              | 0     |
| S2_k141_144143                              | 3403  | Yes | 1700 | 2 | 1              | Low-quality     | Genome-fragment | NA              | 1.35  |
| S12_k141_258992                             | 1010  | No  | NA   | 0 | 0              | Not-determined  | Genome-fragment | NA              | 0     |
| S12_k141_208739                             | 3263  | No  | NA   | 0 | 0              | Not-determined  | Genome-fragment | NA              | 0     |
| S12_k141_342431                             | 5467  | No  | NA   | 0 | 2              | Not-determined  | Genome-fragment | NA              | 0     |
| S12_k141_41817                              | 1074  | No  | NA   | 0 | 2              | Not-determined  | Genome-fragment | NA              | 0     |
| S12_k141_193113                             | 1344  | No  | NA   | 0 | 1              | Not-determined  | Genome-fragment | NA              | 0     |
| S12_k141_173310                             | 5483  | No  | NA   | 0 | 4              | Not-determined  | Genome-fragment | NA              | 0     |
| S9-final-viral-combined_k141_65882}[full    | 3404  | No  | NA   | 3 | 0              | Low-quality     | Genome-fragment | NA              | 4.54  |
| S7-final-viral-combined_k141_142038}[full   | 3404  | No  | NA   | 2 | 0              | Low-quality     | Genome-fragment | NA              | 9.27  |
| S12_k141_193179                             | 1366  | No  | NA   | 0 | 0              | Not-determined  | Genome-fragment | NA              | 0     |
| S12_k141_108087                             | 23055 | No  | NA   | 0 | 3              | Not-determined  | Genome-fragment | NA              | 0     |
| S12_k141_8025                               | 3391  | No  | NA   | 0 | 0              | Not-determined  | Genome-fragment | NA              | 0     |
| S12_k141_208807                             | 1442  | No  | NA   | 0 | 1              | Not-determined  | Genome-fragment | NA              | 0     |
| S12_k141_242529                             | 2011  | No  | NA   | 0 | 2              | Not-determined  | Genome-fragment | NA              | 0     |
| S12_k141_208817                             | 1790  | No  | NA   | 0 | 1              | Not-determined  | Genome-fragment | NA              | 0     |
| S12_k141_310451                             | 1183  | No  | NA   | 0 | 4              | Not-determined  | Genome-fragment | NA              | 0     |
| S12_k141_310458                             | 4323  | No  | NA   | 0 | 0              | Not-determined  | Genome-fragment | NA              | 0     |
| S12_k141_124530                             | 2965  | No  | NA   | 0 | 0              | Not-determined  | Genome-fragment | NA              | 0     |
| S12_k141_24978                              | 5484  | No  | NA   | 0 | 1              | Not-determined  | Genome-fragment | NA              | 0     |
| S12_k141_376546                             | 1583  | No  | NA   | 0 | 0              | Not-determined  | Genome-fragment | NA              | 0     |
| S12_k141_259101                             | 2504  | No  | NA   | 0 | 3              | Not-determined  | Genome-fragment | NA              | 0     |
| S12_k141_242577                             | 1037  | No  | NA   | 0 | 0              | Not-determined  | Genome-fragment | NA              | 0     |
| S12_k141_108160                             | 2165  | No  | NA   | 0 | 2              | Not-determined  | Genome-fragment | NA              | 0     |
| S2-final-viral-combined_k141_221684}[full   | 3404  | No  | NA   | 1 | 0              | Low-quality     | Genome-fragment | NA              | 5.15  |
| S12_k141_57973                              | 1421  | No  | NA   | 0 | 1              | Not-determined  | Genome-fragment | NA              | 0     |
| S12_k141_193313                             | 1315  | No  | NA   | 0 | 0              | Not-determined  | Genome-fragment | NA              | 0     |
| S1_k141_133373                              | 3405  | No  | NA   | 4 | 0              | Low-quality     | Genome-fragment | NA              | 3.12  |
| S12_k141_57984                              | 1023  | No  | NA   | 0 | 2              | Not-determined  | Genome-fragment | NA              | 0     |
| S12_k141_25578                              | 4130  | No  | NA   | 0 | 3              | Not-determined  | Genome-fragment | NA              | 0     |
| S12_k141_208892                             | 1912  | No  | NA   | 0 | 4              | Not-determined  | Genome-fragment | NA              | 0     |
| S12_k141_142314                             | 3624  | No  | NA   | 0 | 1              | Not-determined  | Genome-fragment | NA              | 0     |
| S12_k141_293443                             | 1885  | No  | NA   | 0 | 1              | Not-determined  | Genome-fragment | NA              | 0     |
| S12_k141_242657                             | 1605  | No  | NA   | 0 | 0              | Not-determined  | Genome-fragment | NA              | 0     |
| S12_k141_25066                              | 1160  | No  | NA   | 0 | 1              | Not-determined  | Genome-fragment | NA              | 0     |
| S12_k141_310543                             | 2111  | No  | NA   | 0 | 0              | Not-determined  | Genome-fragment | NA              | 0     |
| S7_k141_108846                              | 3405  | No  | NA   | 1 | 0              | Low-quality     | Genome-fragment | NA              | 7.67  |
| S7-final-viral-combined_k141_84524}[full    | 3405  | No  | NA   | 2 | 0              | Low-quality     | Genome-fragment | NA              | 5.14  |
| S7-final-viral-combined_k141_13924}[full    | 3407  | Yes | 2429 | 1 | 2              | Low-quality     | Genome-fragment | NA              | 3.49  |
| S12_k141_108210                             | 5213  | No  | NA   | 0 | 1              | Not-determined  | Genome-fragment | NA              | 0     |
| S12_k141_9170                               | 1910  | No  | NA   | 0 | 1              | Not-determined  | Genome-fragment | NA              | 0     |
| S12_k141_58023                              | 1049  | No  | NA   | 0 | 0              | Not-determined  | Genome-fragment | NA              | 0     |
| S12_k141_58094                              | 3599  | No  | NA   | 0 | 2              | Not-determined  | Genome-fragment | NA              | 0     |
| S12_k141_342707                             | 3997  | No  | NA   | 0 | 1              | Not-determined  | Genome-fragment | NA              | 0     |
| S12_k141_42059                              | 1529  | No  | NA   | 0 | 0              | Not-determined  | Genome-fragment | NA              | 0     |
| S12_k141_226135                             | 3186  | No  | NA   | 0 | 4              | Not-determined  | Genome-fragment | NA              | 0     |
| S12_k141_91485                              | 2083  | No  | NA   | 0 | 1              | Not-determined  | Genome-fragment | NA              | 0     |
| S12_k141_142528                             | 2458  | No  | NA   | 0 | 1              | Not-determined  | Genome-fragment | NA              | 0     |
| S12_k141_326677                             | 3685  | No  | NA   | 0 | 2              | Not-determined  | Genome-fragment | NA              | 0     |
| S12_k141_259198                             | 1090  | No  | NA   | 0 | 1              | Not-determined  | Genome-fragment | NA              | 0     |
| S2-final-viral-combined_k141_178260}[full   | 3407  | No  | NA   | 0 | 0              | Low-quality     | Genome-fragment | NA              | 5.89  |
| S12_k141_276546                             |       |     |      |   |                |                 |                 |                 |       |



|                                            |       |     |      |   |   |                |                 |    |       |       |
|--------------------------------------------|-------|-----|------|---|---|----------------|-----------------|----|-------|-------|
| S12_k141_75899                             | 1548  | No  | NA   | 0 | 0 | Not-determined | Genome-fragment | NA |       | 0     |
| S5-final-viral-combined_k141_118735[full]  | 3410  | No  | NA   | 1 | 0 | Low-quality    | Genome-fragment | NA | 8.66  | 0     |
| S12_k141_8507                              | 1133  | No  | NA   | 0 | 0 | Not-determined | Genome-fragment | NA |       | 0     |
| S12_k141_393791                            | 8996  | No  | NA   | 0 | 5 | Not-determined | Genome-fragment | NA |       | 0     |
| S12_k141_242929                            | 5234  | No  | NA   | 0 | 3 | Not-determined | Genome-fragment | NA |       | 0     |
| S12_k141_173759                            | 1188  | No  | NA   | 0 | 0 | Not-determined | Genome-fragment | NA |       | 0     |
| S12_k141_209234                            | 3862  | No  | NA   | 0 | 2 | Not-determined | Genome-fragment | NA |       | 0     |
| S4-final-viral-combined_k141_132100[full]  | 3410  | No  | NA   | 0 | 0 | Low-quality    | Genome-fragment | NA | 8.7   | 0     |
| S9_k141_95867                              | 3411  | No  | NA   | 0 | 1 | Low-quality    | Genome-fragment | NA | 5.79  | 0     |
| S3-final-viral-combined_k141_132929[full]  | 3411  | No  | NA   | 0 | 1 | Low-quality    | Genome-fragment | NA | 6.2   | 0     |
| S12_k141_393838                            | 1416  | No  | NA   | 0 | 1 | Not-determined | Genome-fragment | NA |       | 0     |
| S12_k141_125040                            | 2397  | No  | NA   | 0 | 2 | Not-determined | Genome-fragment | NA |       | 0     |
| S12_k141_276761                            | 1335  | No  | NA   | 0 | 1 | Not-determined | Genome-fragment | NA |       | 0     |
| S12_k141_276770                            | 2729  | No  | NA   | 0 | 1 | Not-determined | Genome-fragment | NA |       | 0     |
| S12_k141_108634                            | 1155  | No  | NA   | 0 | 1 | Not-determined | Genome-fragment | NA |       | 0     |
| S17-final-viral-combined_k141_212533[full] | 3411  | No  | NA   | 0 | 0 | Low-quality    | Genome-fragment | NA | 4.14  | 0     |
| S12_k141_25460                             | 1424  | No  | NA   | 1 | 0 | Not-determined | Genome-fragment | NA |       | 0     |
| S12_k141_276786                            | 1045  | No  | NA   | 0 | 1 | Not-determined | Genome-fragment | NA |       | 0     |
| S4_k141_91198                              | 3411  | No  | NA   | 0 | 1 | Low-quality    | Genome-fragment | NA | 5.86  | 0     |
| S12_k141_175870                            | 1344  | No  | NA   | 0 | 0 | Not-determined | Genome-fragment | NA |       | 0     |
| S12_k141_76065                             | 1088  | No  | NA   | 0 | 0 | Not-determined | Genome-fragment | NA |       | 0     |
| S12_k141_25478                             | 1158  | No  | NA   | 0 | 1 | Not-determined | Genome-fragment | NA |       | 0     |
| S12_k141_209362                            | 3362  | No  | NA   | 0 | 2 | Not-determined | Genome-fragment | NA |       | 0     |
| S12_k141_276799                            | 1887  | No  | NA   | 0 | 1 | Not-determined | Genome-fragment | NA |       | 0     |
| S12_k141_393944                            | 2706  | No  | NA   | 0 | 2 | Not-determined | Genome-fragment | NA |       | 0     |
| S5_k141_91187                              | 3413  | No  | NA   | 0 | 0 | Low-quality    | Genome-fragment | NA | 4.98  | 0     |
| S12_k141_294037                            | 1388  | No  | NA   | 0 | 0 | Not-determined | Genome-fragment | NA |       | 0     |
| S12_k141_175896                            | 3109  | No  | NA   | 0 | 1 | Not-determined | Genome-fragment | NA |       | 0     |
| S12-final-viral-combined_k141_85398[full]  | 3413  | No  | NA   | 0 | 0 | Low-quality    | Genome-fragment | NA | 9.16  | 0     |
| S12_k141_125169                            | 6170  | No  | NA   | 0 | 0 | Not-determined | Genome-fragment | NA |       | 0     |
| S12_k141_290405                            | 1344  | No  | NA   | 0 | 1 | Not-determined | Genome-fragment | NA |       | 0     |
| S2-final-viral-combined_k141_104439[full]  | 3413  | No  | NA   | 0 | 1 | Low-quality    | Genome-fragment | NA | 2.24  | 0     |
| S4-final-viral-combined_k141_106746[full]  | 3413  | No  | NA   | 0 | 2 | Low-quality    | Genome-fragment | NA | 1.28  | 0     |
| S12_k141_377000                            | 1044  | No  | NA   | 0 | 0 | Not-determined | Genome-fragment | NA |       | 0     |
| S12_k141_175921                            | 4551  | No  | NA   | 0 | 2 | Not-determined | Genome-fragment | NA |       | 0     |
| S12_k141_390957                            | 1362  | No  | NA   | 0 | 2 | Not-determined | Genome-fragment | NA |       | 0     |
| S12_k141_310989                            | 3399  | No  | NA   | 0 | 3 | Not-determined | Genome-fragment | NA |       | 0     |
| S12_k141_108732                            | 1872  | No  | NA   | 0 | 1 | Not-determined | Genome-fragment | NA |       | 0     |
| S1-final-viral-combined_k141_310902[full]  | 3414  | No  | NA   | 0 | 0 | Low-quality    | Genome-fragment | NA | 10.61 | 0     |
| S12_k141_125214                            | 1373  | No  | NA   | 0 | 1 | Not-determined | Genome-fragment | NA |       | 0     |
| S12_k141_377024                            | 1867  | No  | NA   | 0 | 1 | Not-determined | Genome-fragment | NA |       | 0     |
| S12_k141_209464                            | 2055  | No  | NA   | 0 | 2 | Not-determined | Genome-fragment | NA |       | 0     |
| S12_k141_25534                             | 2748  | No  | NA   | 0 | 2 | Not-determined | Genome-fragment | NA |       | 0     |
| S17-final-viral-combined_k141_238378[full] | 3414  | No  | NA   | 0 | 3 | Low-quality    | Genome-fragment | NA | 1.22  | 0     |
| S12-final-viral-combined_k141_225962[full] | 3414  | No  | NA   | 3 | 0 | Low-quality    | Genome-fragment | NA | 8.66  | 0     |
| S12_k141_76172                             | 5019  | No  | NA   | 0 | 1 | Not-determined | Genome-fragment | NA |       | 0     |
| S12_k141_42563                             | 1186  | No  | NA   | 0 | 1 | Not-determined | Genome-fragment | NA |       | 0     |
| S12_k141_327170                            | 3173  | No  | NA   | 0 | 3 | Not-determined | Genome-fragment | NA |       | 0     |
| S2_k141_150396                             | 3414  | No  | NA   | 1 | 0 | Low-quality    | Genome-fragment | NA | 6.88  | 0     |
| S6_k141_138839                             | 3414  | No  | NA   | 0 | 2 | Low-quality    | Genome-fragment | NA | 6.53  | 0     |
| S12_k141_76220                             | 4231  | No  | NA   | 0 | 4 | Not-determined | Genome-fragment | NA |       | 0     |
| S12_k141_175009                            | 3804  | No  | NA   | 0 | 0 | Not-determined | Genome-fragment | NA |       | 0     |
| S12_k141_327212                            | 4446  | No  | NA   | 0 | 2 | Not-determined | Genome-fragment | NA |       | 0     |
| S12_k141_58561                             | 2686  | No  | NA   | 0 | 1 | Not-determined | Genome-fragment | NA |       | 0     |
| S12_k141_108868                            | 1202  | No  | NA   | 0 | 0 | Not-determined | Genome-fragment | NA |       | 0     |
| S12_k141_259525                            | 1249  | No  | NA   | 0 | 2 | Not-determined | Genome-fragment | NA |       | 0     |
| S12_k141_91990                             | 4708  | No  | NA   | 0 | 2 | Not-determined | Genome-fragment | NA |       | 0     |
| S12_k141_209568                            | 1320  | No  | NA   | 0 | 1 | Not-determined | Genome-fragment | NA |       | 0     |
| S12_k141_294123                            | 7025  | No  | NA   | 0 | 1 | Not-determined | Genome-fragment | NA |       | 0     |
| S12_k141_58584                             | 1951  | No  | NA   | 0 | 1 | Not-determined | Genome-fragment | NA |       | 0     |
| S12_k141_193865                            | 1076  | No  | NA   | 0 | 0 | Not-determined | Genome-fragment | NA |       | 0     |
| S12_k141_42671                             | 1041  | No  | NA   | 0 | 1 | Not-determined | Genome-fragment | NA |       | 0     |
| S12_k141_377103                            | 1438  | No  | NA   | 0 | 1 | Not-determined | Genome-fragment | NA |       | 0     |
| S1_k141_373338                             | 3415  | No  | NA   | 5 | 0 | Low-quality    | Genome-fragment | NA | 7.37  | 0     |
| S12_k141_311166                            | 1778  | No  | NA   | 0 | 1 | Not-determined | Genome-fragment | NA |       | 0     |
| S12_k141_394078                            | 1236  | No  | NA   | 0 | 0 | Not-determined | Genome-fragment | NA |       | 0     |
| S12_k141_226827                            | 2084  | No  | NA   | 0 | 1 | Not-determined | Genome-fragment | NA |       | 0     |
| S12_k141_176066                            | 2674  | No  | NA   | 0 | 1 | Not-determined | Genome-fragment | NA |       | 0     |
| S17-final-viral-combined_k141_171967[full] | 3415  | No  | NA   | 0 | 0 | Low-quality    | Genome-fragment | NA | 1.3   | 0     |
| S12_k141_8717                              | 1583  | No  | NA   | 0 | 0 | Not-determined | Genome-fragment | NA |       | 0     |
| S12_k141_108990                            | 1445  | No  | NA   | 0 | 3 | Not-determined | Genome-fragment | NA |       | 0     |
| S2-final-viral-combined_k141_134759[full]  | 3416  | No  | NA   | 3 | 0 | Low-quality    | Genome-fragment | NA | 8.46  | 0     |
| S12_k141_92060                             | 1474  | No  | NA   | 0 | 0 | Not-determined | Genome-fragment | NA |       | 0     |
| S12_k141_25733                             | 1245  | No  | NA   | 0 | 1 | Not-determined | Genome-fragment | NA |       | 0     |
| S12_k141_377205                            | 3958  | No  | NA   | 0 | 1 | Not-determined | Genome-fragment | NA |       | 0     |
| S8-final-viral-combined_k141_190547[full]  | 3416  | No  | NA   | 0 | 2 | Low-quality    | Genome-fragment | NA | 6.42  | 0     |
| S12_k141_377210                            | 4440  | No  | NA   | 0 | 2 | Not-determined | Genome-fragment | NA |       | 0     |
| S6_k141_110894                             | 3417  | No  | NA   | 0 | 0 | Low-quality    | Genome-fragment | NA | 5.81  | 0     |
| S12_k141_394192                            | 2452  | No  | NA   | 0 | 3 | Not-determined | Genome-fragment | NA |       | 0     |
| S12_k141_92102                             | 2558  | No  | NA   | 0 | 2 | Not-determined | Genome-fragment | NA |       | 0     |
| S12_k141_377253                            | 1761  | No  | NA   | 0 | 1 | Not-determined | Genome-fragment | NA |       | 0     |
| S12_k141_317459                            | 1262  | No  | NA   | 0 | 1 | Not-determined | Genome-fragment | NA |       | 0     |
| S12_k141_159844                            | 1081  | No  | NA   | 0 | 2 | Not-determined | Genome-fragment | NA |       | 0     |
| S12_k141_109057                            | 2092  | No  | NA   | 0 | 1 | Not-determined | Genome-fragment | NA |       | 0     |
| S12_k141_194128                            | 1113  | No  | NA   | 0 | 0 | Not-determined | Genome-fragment | NA |       | 0     |
| S12_k141_176169                            | 3482  | No  | NA   | 0 | 2 | Not-determined | Genome-fragment | NA |       | 0     |
| S12_k141_8843                              | 1174  | No  | NA   | 0 | 1 | Not-determined | Genome-fragment | NA |       | 0     |
| S12_k141_109103                            | 1815  | No  | NA   | 0 | 4 | Not-determined | Genome-fragment | NA |       | 0     |
| S12_k141_8847                              | 1124  | No  | NA   | 0 | 1 | Not-determined | Genome-fragment | NA |       | 0     |
| S9_k141_6478                               | 3418  | No  | NA   | 0 | 1 | Low-quality    | Genome-fragment | NA | 10.44 | 0     |
| S12_k141_159909                            | 3693  | No  | NA   | 0 | 2 | Not-determined | Genome-fragment | NA |       | 0     |
| S12_k141_159922                            | 1354  | No  | NA   | 0 | 2 | Not-determined | Genome-fragment | NA |       | 0     |
| S9_k141_89763                              | 3418  | No  | NA   | 0 | 0 | Low-quality    | Genome-fragment | NA | 9.5   | 0     |
| S12_k141_277166                            | 1549  | No  | NA   | 0 | 2 | Not-determined | Genome-fragment | NA |       | 0     |
| S12_k141_209814                            | 1672  | No  | NA   | 0 | 0 | Not-determined | Genome-fragment | NA |       | 0     |
| S12_k141_109147                            | 1024  | No  | NA   | 0 | 1 | Not-determined | Genome-fragment | NA |       | 0     |
| S12_k141_109149                            | 1052  | No  | NA   | 0 | 1 | Not-determined | Genome-fragment | NA |       | 0     |
| S12_k141_76587                             | 1539  | No  | NA   | 0 | 0 | Not-determined | Genome-fragment | NA |       | 0     |
| S12_k141_209856                            | 1219  | No  | NA   | 0 | 0 | Not-determined | Genome-fragment | NA |       | 0     |
| S12_k141_311428                            | 6205  | No  | NA   | 0 | 2 | Not-determined | Genome-fragment | NA |       | 0     |
| S17-final-viral-combined_k141_127910[full] | 3418  | No  | NA   | 0 | 3 | Low-quality    | Genome-fragment | NA | 5.8   | 0     |
| S12_k141_92243                             | 1448  | No  | NA   | 0 | 0 | Not-determined | Genome-fragment | NA |       | 0     |
| S12_k141_243471                            | 1620  | No  | NA   | 0 | 2 | Not-determined | Genome-fragment | NA |       | 0     |
| S12_k141_327687                            | 3071  | No  | NA   | 0 | 2 | Not-determined | Genome-fragment | NA |       | 0     |
| S17-final-viral-combined_k141_53104[full]  | 3418  | Yes | 1264 | 1 | 0 | Low-quality    | Genome-fragment | NA | 2.53  | 63.02 |
| S12_k141_76689                             | 1103  | No  | NA   | 0 | 1 | Not-determined | Genome-fragment | NA |       | 0     |
| S12_k141_76697                             | 1010  | No  | NA   | 0 | 1 | Not-determined | Genome-fragment | NA |       | 0     |
| S12_k141_160056                            | 2102  | No  | NA   | 0 | 0 | Not-determined | Genome-fragment | NA |       | 0     |
| S12-final-viral-combined_k141_70956[full]  | 3418  | No  | NA   | 1 | 0 | Low-quality    | Genome-fragment | NA | 4.06  | 0     |
| S12_k141_390081                            | 3418  | No  | NA   | 0 | 2 | Low-quality    | Genome-fragment | NA | 2.23  | 0     |
| S12_k141_109280                            | 1113  | No  | NA   | 0 | 1 | Not-determined | Genome-fragment | NA |       | 0     |
| S1-final-viral-combined_k141_65149[full]   | 3419  | No  | NA   | 0 | 0 | Low-quality    | Genome-fragment | NA | 4.78  | 0     |
| S12_k141_210033                            | 3139  | No  | NA   | 0 | 0 | Not-determined | Genome-fragment | NA |       | 0     |
| S6-final-viral-combined_k141_40774[full]   | 3419  | No  | NA   | 0 | 4 | Low-quality    | Genome-fragment | NA | 2.42  | 0     |
| S9-final-viral-combined_k141_64319[full]   | 2420  | No  | NA   | 0 | 0 | Low-quality    | Genome-fragment | NA | 5.17  | 0     |
| S12_k141_160115                            | 2010  | No  | NA   | 0 | 0 | Not-determined | Genome-fragment | NA |       | 0     |
| S12_k141_109312                            | 1296  | No  | NA   | 0 | 1 | Not-determined | Genome-fragment | NA |       | 0     |
| S5-final-viral-combined_k141_27571[full]   | 3420  | No  | NA   | 1 | 0 | Low-quality    | Genome-fragment | NA | 4.53  | 0     |
| S12_k141_277306                            | 1472  | No  | NA   | 0 | 1 | Not-determined | Genome-fragment | NA |       | 0     |
| S12_k141_377509                            | 1246  | No  | NA   | 0 | 2 | Not-determined | Genome-fragment | NA |       | 0     |
| S12-final-viral-combined_k141_11031[full]  | 3420  | No  | NA   | 0 | 2 | Low-quality    | Genome-fragment | NA | 3.94  | 0     |
| S12_k141_160147                            | 1000  | No  | NA   | 0 | 0 | Not-determined | Genome-fragment | NA |       | 0     |
| S12_k141_277336                            | 2265  | No  | NA   | 0 | 0 | Not-determined | Genome-fragment | NA |       | 0     |
| S12_k141_343692                            | 2011  | No  | NA   | 0 | 1 | Not-determined | Genome-fragment | NA |       | 0     |
| S12_k141_343695                            | 1187  | No  | NA   | 0 | 1 | Not-determined | Genome-fragment | NA |       | 0     |
| S12_k141_160173                            | 2701  | No  | NA   | 0 | 2 | Not-determined | Genome-fragment | NA |       | 0     |
| S12_k141_259882                            | 1105  | No  | NA   | 0 | 0 | Not-determined | Genome-fragment | NA |       | 0     |
| S12_k141_109392                            | 1063  | No  | NA   | 0 | 1 | Not-determined | Genome-fragment | NA |       | 0     |
| S12_k141_184197                            | 1632  | No  | NA   | 0 | 0 | Not-determined | Genome-fragment | NA |       | 0     |
| S12_k141_109394                            | 7424  | No  | NA   | 0 | 1 | Not-determined | Genome-fragment | NA |       | 0     |
| S1-final-viral-combined_k141_183566[full]  | 3421  | No  | NA   | 1 | 0 | Low-quality    | Genome-fragment | NA | 2.02  | 0     |
| S12_k141_294481                            | 7051  | No  | NA   | 0 | 7 | Not-determined | Genome-fragment | NA |       | 0     |
| S12_k141_76828                             | 5571  | No  | NA   | 0 | 4 | Not-determined | Genome-fragment | NA |       | 0     |
| S2-final-viral-combined_k141_226912[full]  | 3421  | No  | NA   | 0 | 0 | Low-quality    | Genome-fragment | NA | 9.33  | 0     |
| S11-final-viral-combined_k141_44657[full]  | 3422  | No  | NA   | 3 | 0 | Low-quality    | Genome-fragment | NA | 7.22  | 0     |
| S12_k141_176497                            | 1284  | No  | NA   | 0 | 2 | Not-determined | Genome-fragment | NA |       | 0     |
| S12_k141_377569                            | 11039 | No  | NA   | 0 | 2 | Not-determined | Genome-fragment | NA |       | 0     |
| S12_k141_176522                            | 7835  | No  |      |   |   |                |                 |    |       |       |



|                                             |       |     |      |   |   |                |                 |    |       |
|---------------------------------------------|-------|-----|------|---|---|----------------|-----------------|----|-------|
| S12_k141_210330                             | 1388  | No  | NA   | 0 | 1 | Not-determined | Genome-fragment | NA | 0     |
| S12_k141_20922                              | 1516  | No  | NA   | 0 | 1 | Not-determined | Genome-fragment | NA | 0     |
| S12_k141_77050                              | 1496  | No  | NA   | 0 | 2 | Not-determined | Genome-fragment | NA | 0     |
| S12_k141_9211                               | 1395  | No  | NA   | 0 | 1 | Not-determined | Genome-fragment | NA | 0     |
| S12_k141_125606                             | 1270  | No  | NA   | 0 | 1 | Not-determined | Genome-fragment | NA | 0     |
| S12_k141_210346                             | 1165  | No  | NA   | 0 | 0 | Not-determined | Genome-fragment | NA | 0     |
| S4_k141_149808                              | 3425  | No  | NA   | 1 | 0 | Low-quality    | Genome-fragment | NA | 4.92  |
| S12_k141_377890                             | 1188  | No  | NA   | 0 | 1 | Not-determined | Genome-fragment | NA | 0     |
| S2_k141_54125                               | 3426  | No  | NA   | 0 | 1 | Low-quality    | Genome-fragment | NA | 5.21  |
| S11-final-viral-combined_k141_199136}[full] | 3427  | No  | NA   | 1 | 0 | Low-quality    | Genome-fragment | NA | 3.63  |
| S12_k141_125640                             | 1323  | No  | NA   | 0 | 0 | Not-determined | Genome-fragment | NA | 0     |
| S17-k141_31281                              | 3427  | No  | NA   | 0 | 4 | Low-quality    | Genome-fragment | NA | 1.27  |
| S12_k141_344155                             | 2587  | No  | NA   | 0 | 3 | Not-determined | Genome-fragment | NA | 0     |
| S12_k141_394473                             | 3715  | No  | NA   | 0 | 4 | Not-determined | Genome-fragment | NA | 0     |
| S12_k141_176791                             | 1243  | No  | NA   | 0 | 1 | Not-determined | Genome-fragment | NA | 0     |
| S12-final-viral-combined_k141_252276}[full] | 3427  | No  | NA   | 0 | 1 | Low-quality    | Genome-fragment | NA | 4.83  |
| S12_k141_312037                             | 1012  | No  | NA   | 0 | 0 | Not-determined | Genome-fragment | NA | 0     |
| S12_k141_160521                             | 1177  | No  | NA   | 0 | 0 | Not-determined | Genome-fragment | NA | 0     |
| S8-final-viral-combined_k141_148152}[full]  | 3427  | No  | NA   | 0 | 2 | Low-quality    | Genome-fragment | NA | 1.88  |
| S3-final-viral-combined_k141_61852}[full]   | 3428  | No  | NA   | 0 | 0 | Low-quality    | Genome-fragment | NA | 8.21  |
| S12_k141_176824                             | 1588  | No  | NA   | 0 | 1 | Not-determined | Genome-fragment | NA | 0     |
| S2-final-viral-combined_k141_160697}[full]  | 3428  | No  | NA   | 0 | 0 | Low-quality    | Genome-fragment | NA | 11.31 |
| S12_k141_227658                             | 1211  | No  | NA   | 0 | 0 | Not-determined | Genome-fragment | NA | 0     |
| S12_k141_927710                             | 11468 | No  | NA   | 0 | 7 | Not-determined | Genome-fragment | NA | 0     |
| S8-final-viral-combined_k141_103732}[full]  | 3429  | No  | NA   | 0 | 0 | Low-quality    | Genome-fragment | NA | 6.53  |
| S12_k141_77187                              | 1164  | No  | NA   | 0 | 2 | Not-determined | Genome-fragment | NA | 0     |
| S12_k141_359697                             | 1629  | No  | NA   | 0 | 0 | Not-determined | Genome-fragment | NA | 0     |
| S12_k141_394519                             | 1137  | No  | NA   | 0 | 1 | Not-determined | Genome-fragment | NA | 0     |
| S3-final-viral-combined_k141_72185}[full]   | 3429  | No  | NA   | 0 | 5 | Low-quality    | Genome-fragment | NA | 0.82  |
| S8-final-viral-combined_k141_276049}[full]  | 3429  | No  | NA   | 2 | 0 | Low-quality    | Genome-fragment | NA | 6.01  |
| S12_k141_294859                             | 13605 | No  | NA   | 0 | 3 | Not-determined | Genome-fragment | NA | 0     |
| S12_k141_1009731                            | 4247  | No  | NA   | 0 | 3 | Not-determined | Genome-fragment | NA | 0     |
| S12_k141_227697                             | 1083  | No  | NA   | 0 | 0 | Not-determined | Genome-fragment | NA | 0     |
| S12_k141_26459                              | 3295  | No  | NA   | 0 | 2 | Not-determined | Genome-fragment | NA | 0     |
| S12_k141_59415                              | 1883  | No  | NA   | 0 | 0 | Not-determined | Genome-fragment | NA | 0     |
| S8_k141_310384                              | 3429  | No  | NA   | 0 | 1 | Low-quality    | Genome-fragment | NA | 1.33  |
| S11-final-viral-combined_k141_140224}[full] | 3430  | No  | NA   | 1 | 0 | Low-quality    | Genome-fragment | NA | 5.97  |
| S12_k141_312180                             | 1406  | No  | NA   | 0 | 1 | Not-determined | Genome-fragment | NA | 0     |
| S12_k141_394634                             | 1083  | No  | NA   | 0 | 0 | Not-determined | Genome-fragment | NA | 0     |
| S5_k141_180003                              | 3430  | No  | NA   | 0 | 2 | Low-quality    | Genome-fragment | NA | 0.89  |
| S12_k141_176943                             | 1545  | No  | NA   | 0 | 0 | Not-determined | Genome-fragment | NA | 0     |
| S2_k141_116853                              | 3430  | No  | NA   | 0 | 1 | Low-quality    | Genome-fragment | NA | 3.57  |
| S12_k141_59486                              | 6087  | No  | NA   | 0 | 1 | Not-determined | Genome-fragment | NA | 0     |
| S12_k141_160651                             | 3272  | No  | NA   | 0 | 4 | Not-determined | Genome-fragment | NA | 0     |
| S11_k141_72198                              | 3431  | No  | NA   | 0 | 0 | Low-quality    | Genome-fragment | NA | 7.64  |
| S12_k141_59524                              | 1169  | No  | NA   | 0 | 0 | Not-determined | Genome-fragment | NA | 0     |
| S12_k141_295018                             | 6084  | No  | NA   | 0 | 4 | Not-determined | Genome-fragment | NA | 0     |
| S12_k141_160659                             | 2447  | No  | NA   | 0 | 2 | Not-determined | Genome-fragment | NA | 0     |
| S2_k141_204260                              | 3431  | No  | NA   | 0 | 0 | Low-quality    | Genome-fragment | NA | 3.19  |
| S1-final-viral-combined_k141_258917}[full]  | 3433  | No  | NA   | 0 | 0 | Low-quality    | Genome-fragment | NA | 7.34  |
| S12_k141_143415                             | 1312  | No  | NA   | 0 | 2 | Not-determined | Genome-fragment | NA | 0     |
| S12_k141_160076                             | 2184  | No  | NA   | 0 | 1 | Not-determined | Genome-fragment | NA | 0     |
| S12_k141_77377                              | 1061  | No  | NA   | 0 | 0 | Not-determined | Genome-fragment | NA | 0     |
| S12_k141_9400                               | 1359  | No  | NA   | 0 | 0 | Not-determined | Genome-fragment | NA | 0     |
| S12_k141_260359                             | 3390  | No  | NA   | 0 | 6 | Not-determined | Genome-fragment | NA | 0     |
| S12_k141_394741                             | 10156 | No  | NA   | 0 | 8 | Not-determined | Genome-fragment | NA | 0     |
| S12_k141_394758                             | 1229  | No  | NA   | 0 | 1 | Not-determined | Genome-fragment | NA | 0     |
| S12_k141_277895                             | 1742  | No  | NA   | 0 | 1 | Not-determined | Genome-fragment | NA | 0     |
| S12_k141_92090                              | 1363  | No  | NA   | 0 | 1 | Not-determined | Genome-fragment | NA | 0     |
| S12_k141_378242                             | 1516  | No  | NA   | 0 | 0 | Not-determined | Genome-fragment | NA | 0     |
| S12_k141_59626                              | 1027  | No  | NA   | 0 | 1 | Not-determined | Genome-fragment | NA | 0     |
| S12_k141_312379                             | 1176  | No  | NA   | 0 | 1 | Not-determined | Genome-fragment | NA | 0     |
| S9_k141_82440                               | 3434  | No  | NA   | 1 | 0 | Low-quality    | Genome-fragment | NA | 7.21  |
| S12_k141_59637                              | 2959  | No  | NA   | 0 | 0 | Not-determined | Genome-fragment | NA | 0     |
| S12_k141_109916                             | 1524  | No  | NA   | 0 | 0 | Not-determined | Genome-fragment | NA | 0     |
| S12_k141_394788                             | 2489  | No  | NA   | 0 | 2 | Not-determined | Genome-fragment | NA | 0     |
| S12_k141_26718                              | 1489  | No  | NA   | 0 | 3 | Not-determined | Genome-fragment | NA | 0     |
| S11_k141_304922                             | 3434  | No  | NA   | 0 | 0 | Low-quality    | Genome-fragment | NA | 2.04  |
| S12_k141_160753                             | 1617  | No  | NA   | 0 | 0 | Not-determined | Genome-fragment | NA | 0     |
| S12_k141_109950                             | 1024  | No  | NA   | 0 | 1 | Not-determined | Genome-fragment | NA | 0     |
| S12_k141_143512                             | 2220  | No  | NA   | 0 | 0 | Not-determined | Genome-fragment | NA | 0     |
| S8-final-viral-combined_k141_255297}[full]  | 3434  | No  | NA   | 1 | 0 | Low-quality    | Genome-fragment | NA | 2.46  |
| S12_k141_9511                               | 1177  | No  | NA   | 0 | 1 | Not-determined | Genome-fragment | NA | 0     |
| S12_k141_160772                             | 1673  | No  | NA   | 0 | 1 | Not-determined | Genome-fragment | NA | 0     |
| S12_k141_394814                             | 1124  | No  | NA   | 0 | 1 | Not-determined | Genome-fragment | NA | 0     |
| S9-final-viral-combined_k141_114452}[full]  | 3435  | No  | NA   | 0 | 0 | Low-quality    | Genome-fragment | NA | 5.74  |
| S1-final-viral-combined_k141_56493}[full]   | 3435  | No  | NA   | 3 | 0 | Low-quality    | Genome-fragment | NA | 4.12  |
| S12_k141_77342                              | 1061  | No  | NA   | 0 | 0 | Not-determined | Genome-fragment | NA | 0     |
| S12_k141_344442                             | 1744  | No  | NA   | 0 | 0 | Not-determined | Genome-fragment | NA | 0     |
| S12_k141_125955                             | 6224  | No  | NA   | 0 | 5 | Not-determined | Genome-fragment | NA | 0     |
| S12_k141_394847                             | 2243  | No  | NA   | 0 | 0 | Not-determined | Genome-fragment | NA | 0     |
| S12_k141_210646                             | 1002  | No  | NA   | 0 | 0 | Not-determined | Genome-fragment | NA | 0     |
| S12_k141_59787                              | 1042  | No  | NA   | 0 | 1 | Not-determined | Genome-fragment | NA | 0     |
| S12_k141_277989                             | 1154  | No  | NA   | 0 | 0 | Not-determined | Genome-fragment | NA | 0     |
| S5-final-viral-combined_k141_212556}[full]  | 3435  | No  | NA   | 0 | 0 | Low-quality    | Genome-fragment | NA | 9.08  |
| S12_k141_394898                             | 1246  | No  | NA   | 0 | 2 | Not-determined | Genome-fragment | NA | 0     |
| S12_k141_344486                             | 1512  | No  | NA   | 0 | 1 | Not-determined | Genome-fragment | NA | 0     |
| S12_k141_244029                             | 1355  | No  | NA   | 0 | 1 | Not-determined | Genome-fragment | NA | 0     |
| S12_k141_394921                             | 1027  | No  | NA   | 0 | 0 | Not-determined | Genome-fragment | NA | 0     |
| S12_k141_24243                              | 3435  | No  | NA   | 2 | 0 | Low-quality    | Genome-fragment | NA | 7.63  |
| S9-final-viral-combined_k141_102429}[full]  | 3436  | No  | NA   | 0 | 1 | Low-quality    | Genome-fragment | NA | 7.97  |
| S12_k141_9636                               | 3435  | No  | NA   | 0 | 0 | Not-determined | Genome-fragment | NA | 0     |
| S12_k141_344514                             | 1340  | No  | NA   | 0 | 1 | Not-determined | Genome-fragment | NA | 0     |
| S12_k141_360112                             | 1045  | No  | NA   | 0 | 1 | Not-determined | Genome-fragment | NA | 0     |
| S12_k141_44024                              | 1049  | No  | NA   | 0 | 0 | Not-determined | Genome-fragment | NA | 0     |
| S9-final-viral-combined_k141_73918}[full]   | 3436  | No  | NA   | 4 | 0 | Low-quality    | Genome-fragment | NA | 8.51  |
| S12_k141_260565                             | 9033  | No  | NA   | 0 | 3 | Not-determined | Genome-fragment | NA | 0     |
| S12_k141_210730                             | 1102  | No  | NA   | 0 | 1 | Not-determined | Genome-fragment | NA | 0     |
| S12_k141_360146                             | 3027  | No  | NA   | 0 | 1 | Not-determined | Genome-fragment | NA | 0     |
| S12_k141_44049                              | 1444  | No  | NA   | 0 | 1 | Not-determined | Genome-fragment | NA | 0     |
| S12_k141_44057                              | 1178  | No  | NA   | 0 | 0 | Not-determined | Genome-fragment | NA | 0     |
| S12_k141_59926                              | 1366  | No  | NA   | 0 | 2 | Not-determined | Genome-fragment | NA | 0     |
| S12_k141_160894                             | 3726  | No  | NA   | 0 | 2 | Not-determined | Genome-fragment | NA | 0     |
| S12_k141_394981                             | 1399  | No  | NA   | 0 | 0 | Not-determined | Genome-fragment | NA | 0     |
| S12_k141_210802                             | 1488  | No  | NA   | 0 | 0 | Not-determined | Genome-fragment | NA | 0     |
| S12_k141_260623                             | 1610  | No  | NA   | 0 | 0 | Not-determined | Genome-fragment | NA | 0     |
| S12_k141_344557                             | 1077  | No  | NA   | 0 | 1 | Not-determined | Genome-fragment | NA | 0     |
| S12_k141_39948                              | 7204  | No  | NA   | 0 | 2 | Not-determined | Genome-fragment | NA | 0     |
| S12_k141_278072                             | 5018  | No  | NA   | 0 | 0 | Not-determined | Genome-fragment | NA | 0     |
| S12_k141_210808                             | 1021  | No  | NA   | 0 | 1 | Not-determined | Genome-fragment | NA | 0     |
| S12_k141_177242                             | 1545  | No  | NA   | 0 | 1 | Not-determined | Genome-fragment | NA | 0     |
| S5_k141_103265                              | 3436  | Yes | 1229 | 1 | 0 | Low-quality    | Genome-fragment | NA | 0.72  |
| S7_k141_207241                              | 3436  | No  | NA   | 1 | 0 | Low-quality    | Genome-fragment | NA | 7.22  |
| S12_k141_244145                             | 8378  | No  | NA   | 0 | 9 | Not-determined | Genome-fragment | NA | 0     |
| S12_k141_295355                             | 1388  | No  | NA   | 0 | 2 | Not-determined | Genome-fragment | NA | 0     |
| S12_k141_109985                             | 6205  | No  | NA   | 0 | 2 | Not-determined | Genome-fragment | NA | 0     |
| S12_k141_160982                             | 1287  | No  | NA   | 0 | 1 | Not-determined | Genome-fragment | NA | 0     |
| S12_k141_278122                             | 1264  | No  | NA   | 0 | 1 | Not-determined | Genome-fragment | NA | 0     |
| S12_k141_395076                             | 1154  | No  | NA   | 0 | 1 | Not-determined | Genome-fragment | NA | 0     |
| S12_k141_210867                             | 1564  | No  | NA   | 0 | 0 | Not-determined | Genome-fragment | NA | 0     |
| S6-final-viral-combined_k141_184395}[full]  | 3436  | No  | NA   | 2 | 0 | Low-quality    | Genome-fragment | NA | 3.56  |
| S12_k141_395082                             | 1047  | No  | NA   | 0 | 0 | Not-determined | Genome-fragment | NA | 0     |
| S12_k141_278169                             | 1172  | No  | NA   | 0 | 1 | Not-determined | Genome-fragment | NA | 0     |
| S1-final-viral-combined_k141_240533}[full]  | 3437  | No  | NA   | 1 | 0 | Low-quality    | Genome-fragment | NA | 9.1   |
| S12_k141_194919                             | 2404  | No  | NA   | 0 | 0 | Not-determined | Genome-fragment | NA | 0     |
| S5-final-viral-combined_k141_18479}[full]   | 3437  | No  | NA   | 1 | 0 | Low-quality    | Genome-fragment | NA | 2.36  |
| S12_k141_278220                             | 1206  | No  | NA   | 0 | 0 | Not-determined | Genome-fragment | NA | 0     |
| S12_k141_210927                             | 1116  | No  | NA   | 0 | 1 | Not-determined | Genome-fragment | NA | 0     |
| S12_k141_378581                             | 1850  | No  | NA   | 0 | 0 | Not-determined | Genome-fragment | NA | 0     |
| S12-final-viral-combined_k141_180988}[full] | 3437  | No  | NA   | 0 | 2 | Low-quality    | Genome-fragment | NA | 1.46  |
| S12_k141_328482                             | 1526  | No  | NA   | 0 | 1 | Not-determined | Genome-fragment | NA | 0     |
| S12_k141_60124                              | 3561  | No  | NA   | 0 | 1 | Not-determined | Genome-fragment | NA | 0     |
| S12_k141_244295                             | 7935  | No  | NA   | 0 | 3 | Not-determined | Genome-fragment | NA | 0     |
| S12_k141_77837                              | 1197  | No  | NA   | 0 | 2 | Not-determined | Genome-fragment | NA | 0     |
| S6-final-viral-combined_k141_45485}[full]   | 3437  | No  | NA   | 0 | 1 | Low-quality    | Genome-fragment | NA | 7.41  |
| S12_k141_210954                             | 1867  | No  | NA   | 0 | 2 | Not-determined | Genome-fragment | NA | 0     |
| S12_k141_60159                              | 1008  | No  | NA   | 0 | 1 | Not-determined | Genome-fragment | NA | 0     |
| S12_k141_110025                             | 3117  | No  | NA   | 0 | 1 | Not-determined | Genome-fragment | NA | 0     |
| S12_k141_395244                             | 8405  | No  | NA   | 0 | 5 | Not-determined | Genome-fragment | NA | 0     |
| S12_k141_195025                             | 2607  | No  | NA   | 0 | 1 | Not-determined | Genome-fragment | NA | 0     |
| S12_k141_228334                             | 6318  | No  | NA   | 0 | 3 | Not-determined | Genome-fragment | NA | 0     |
| S12_k141_27049                              | 1229  | No  | NA   | 0 | 2 | Not-determined | Genome-fragment | NA | 0     |
| S12_k141_126250                             | 1123  | No  | NA   | 0 | 0 | Not-determined | Genome-fragment | NA | 0     |
| S12_k141_195072                             | 1216  | No  | NA   | 0 | 1 | Not-determined | Genome-fragment | NA | 0     |
| S12_k141_211035                             | 3283  | No  | NA   | 0 | 2 | Not-determined | Genome-fragment | NA | 0     |



|                                            |       |     |    |       |    |    |                |                 |       |       |
|--------------------------------------------|-------|-----|----|-------|----|----|----------------|-----------------|-------|-------|
| S12_k141_161239                            | 25372 | Yes |    | 19782 | 16 | 4  | Medium-quality | Genome-fragment | 54.65 | 22.03 |
| S12_k141_161248                            | 1240  | NO  | NA |       | 0  | 0  | Not-determined | Genome-fragment | NA    | 0     |
| S12_k141_9981                              | 1027  | NO  | NA |       | 0  | 1  | Not-determined | Genome-fragment | NA    | 0     |
| S12_k141_9989                              | 1528  | NO  | NA |       | 0  | 2  | Not-determined | Genome-fragment | NA    | 0     |
| S12_k141_261075                            | 1444  | NO  | NA |       | 0  | 2  | Not-determined | Genome-fragment | NA    | 0     |
| S2_k141_21384                              | 3442  | NO  | NA |       | 2  | 2  | Low-quality    | Genome-fragment | 2.37  | 0     |
| S12_k141_214621                            | 1092  | NO  | NA |       | 0  | 1  | Not-determined | Genome-fragment | NA    | 0     |
| S12_k141_195292                            | 1175  | NO  | NA |       | 0  | 1  | Not-determined | Genome-fragment | NA    | 0     |
| S12_k141_244579                            | 1004  | NO  | NA |       | 0  | 0  | Not-determined | Genome-fragment | NA    | 0     |
| S12_k141_244581                            | 1407  | NO  | NA |       | 0  | 0  | Not-determined | Genome-fragment | NA    | 0     |
| S12_k141_33629                             | 1078  | NO  | NA |       | 0  | 1  | Not-determined | Genome-fragment | NA    | 0     |
| S12_k141_44587                             | 1416  | NO  | NA |       | 0  | 2  | Not-determined | Genome-fragment | NA    | 0     |
| S12_k141_261128                            | 1883  | NO  | NA |       | 0  | 0  | Not-determined | Genome-fragment | NA    | 0     |
| S12_k141_21713                             | 1110  | NO  | NA |       | 0  | 2  | Not-determined | Genome-fragment | NA    | 0     |
| S8-final-viral-combined_k141_232066[full]  | 3442  | NO  | NA |       | 1  | 0  | Low-quality    | Genome-fragment | 2.23  | 0     |
| S17k141_169983                             | 3443  | Yes |    | 2498  | 1  | 1  | Low-quality    | Genome-fragment | 0.74  | 27.45 |
| S12_k141_21330                             | 1330  | NO  | NA |       | 0  | 2  | Not-determined | Genome-fragment | NA    | 0     |
| S12_k141_60495                             | 7847  | NO  | NA |       | 0  | 5  | Not-determined | Genome-fragment | NA    | 0     |
| S12_k141_278741                            | 3092  | NO  | NA |       | 0  | 2  | Not-determined | Genome-fragment | NA    | 0     |
| S12_k141_295930                            | 2359  | NO  | NA |       | 0  | 2  | Not-determined | Genome-fragment | NA    | 0     |
| S12_k141_215815                            | 1443  | NO  | NA |       | 0  | 1  | Low-quality    | Genome-fragment | 10.71 | 0     |
| S12_k141_161364                            | 1462  | NO  | NA |       | 0  | 1  | Not-determined | Genome-fragment | NA    | 0     |
| S12_k141_360368                            | 1617  | NO  | NA |       | 0  | 1  | Not-determined | Genome-fragment | NA    | 0     |
| S4-final-viral-combined_k141_3729[full]    | 3442  | NO  | NA |       | 0  | 0  | Low-quality    | Genome-fragment | 6.08  | 0     |
| S12_k141_228694                            | 3447  | NO  | NA |       | 0  | 2  | Not-determined | Genome-fragment | NA    | 0     |
| S17-final-viral-combined_k141_75443[full]  | 3445  | NO  | NA |       | 1  | 0  | Low-quality    | Genome-fragment | 8.34  | 0     |
| S12_k141_1385                              | 1065  | NO  | NA |       | 0  | 1  | Not-determined | Genome-fragment | NA    | 0     |
| S12_k141_341552                            | 2694  | NO  | NA |       | 0  | 2  | Not-determined | Genome-fragment | NA    | 0     |
| S12_k141_360398                            | 1255  | NO  | NA |       | 0  | 0  | Not-determined | Genome-fragment | NA    | 0     |
| S12_k141_278805                            | 1698  | NO  | NA |       | 0  | 1  | Not-determined | Genome-fragment | NA    | 0     |
| S8-final-viral-combined_k141_114833[full]  | 1445  | NO  | NA |       | 0  | 2  | Low-quality    | Genome-fragment | 6.61  | 0     |
| S12_k141_295614                            | 2110  | NO  | NA |       | 0  | 1  | Not-determined | Genome-fragment | NA    | 0     |
| S12_k141_295626                            | 1497  | NO  | NA |       | 0  | 0  | Not-determined | Genome-fragment | NA    | 0     |
| S17-final-viral-combined_k141_2892[full]   | 3446  | NO  | NA |       | 0  | 0  | Low-quality    | Genome-fragment | 9.96  | 0     |
| S12_k141_278856                            | 4079  | NO  | NA |       | 0  | 1  | Not-determined | Genome-fragment | NA    | 0     |
| S9-final-viral-combined_k141_44063[full]   | 3447  | NO  | NA |       | 0  | 0  | Low-quality    | Genome-fragment | 8.33  | 0     |
| S12_k141_25536                             | 1074  | NO  | NA |       | 0  | 0  | Low-quality    | Genome-fragment | NA    | 0     |
| S2_k141_201367                             | 3447  | NO  | NA |       | 0  | 0  | Low-quality    | Genome-fragment | 3.77  | 0     |
| S12_k141_195645                            | 3133  | NO  | NA |       | 0  | 1  | Not-determined | Genome-fragment | NA    | 0     |
| S12_k141_161466                            | 10084 | NO  | NA |       | 0  | 4  | Not-determined | Genome-fragment | NA    | 0     |
| S12_k141_110441                            | 0559  | NO  | NA |       | 0  | 2  | Not-determined | Genome-fragment | NA    | 0     |
| S12_k141_295671                            | 1440  | NO  | NA |       | 0  | 3  | Not-determined | Genome-fragment | NA    | 0     |
| S17-final-viral-combined_k141_259627[full] | 3448  | NO  | NA |       | 2  | 0  | Low-quality    | Genome-fragment | 10.09 | 0     |
| S12_k141_214542                            | 1063  | NO  | NA |       | 0  | 1  | Not-determined | Genome-fragment | NA    | 0     |
| S12_k141_278943                            | 4554  | NO  | NA |       | 0  | 2  | Not-determined | Genome-fragment | NA    | 0     |
| S12_k141_78296                             | 1613  | NO  | NA |       | 0  | 0  | Not-determined | Genome-fragment | NA    | 0     |
| S12_k141_278973                            | 1475  | NO  | NA |       | 0  | 3  | Not-determined | Genome-fragment | NA    | 0     |
| S12_k141_177855                            | 1354  | NO  | NA |       | 0  | 0  | Not-determined | Genome-fragment | NA    | 0     |
| S12_k141_328849                            | 1239  | NO  | NA |       | 0  | 1  | Not-determined | Genome-fragment | NA    | 0     |
| S2-final-viral-combined_k141_32731[full]   | 3448  | NO  | NA |       | 1  | 0  | Low-quality    | Genome-fragment | 8.49  | 0     |
| S12_k141_395617                            | 1144  | NO  | NA |       | 0  | 2  | Not-determined | Genome-fragment | NA    | 0     |
| S12_k141_379141                            | 1692  | NO  | NA |       | 0  | 0  | Not-determined | Genome-fragment | NA    | 0     |
| S4-final-viral-combined_k141_132708[full]  | 3448  | NO  | NA |       | 0  | 3  | Low-quality    | Genome-fragment | 6.9   | 0     |
| S12_k141_299002                            | 1602  | NO  | NA |       | 0  | 0  | Not-determined | Genome-fragment | NA    | 0     |
| S12_k141_177914                            | 17215 | NO  | NA |       | 0  | 3  | Not-determined | Genome-fragment | NA    | 0     |
| S12_k141_126054                            | 1697  | NO  | NA |       | 0  | 2  | Not-determined | Genome-fragment | NA    | 0     |
| S12_k141_214524                            | 1323  | NO  | NA |       | 0  | 1  | Not-determined | Genome-fragment | NA    | 0     |
| S5_k141_185495                             | 3449  | NO  | NA |       | 2  | 0  | Low-quality    | Genome-fragment | 8.51  | 0     |
| S11k141_140056                             | 3449  | NO  | NA |       | 0  | 3  | Low-quality    | Genome-fragment | 1.42  | 0     |
| S12_k141_126667                            | 10629 | NO  | NA |       | 0  | 5  | Not-determined | Genome-fragment | NA    | 0     |
| S12_k141_345337                            | 1002  | NO  | NA |       | 0  | 2  | Not-determined | Genome-fragment | NA    | 0     |
| S12_k141_78410                             | 2162  | NO  | NA |       | 0  | 2  | Not-determined | Genome-fragment | NA    | 0     |
| S12_k141_244883                            | 1074  | NO  | NA |       | 0  | 0  | Not-determined | Genome-fragment | NA    | 0     |
| S12_k141_214516                            | 1001  | NO  | NA |       | 0  | 1  | Not-determined | Genome-fragment | NA    | 0     |
| S12_k141_379227                            | 1503  | NO  | NA |       | 0  | 0  | Not-determined | Genome-fragment | NA    | 0     |
| S12_k141_10217                             | 13478 | NO  | NA |       | 0  | 11 | Not-determined | Genome-fragment | NA    | 0     |
| S12-final-viral-combined_k141_204217[full] | 3450  | NO  | NA |       | 0  | 0  | Low-quality    | Genome-fragment | 2.36  | 0     |
| S12_k141_345382                            | 2248  | NO  | NA |       | 0  | 3  | Not-determined | Genome-fragment | NA    | 0     |
| S12_k141_228938                            | 1077  | NO  | NA |       | 0  | 1  | Not-determined | Genome-fragment | NA    | 0     |
| S12_k141_360647                            | 1279  | NO  | NA |       | 0  | 1  | Not-determined | Genome-fragment | NA    | 0     |
| S12_k141_10241                             | 1321  | NO  | NA |       | 0  | 1  | Not-determined | Genome-fragment | NA    | 0     |
| S12_k141_44817                             | 34968 | NO  | NA |       | 10 | 0  | Medium-quality | Genome-fragment | 76.17 | 0     |
| S12_k141_211667                            | 1190  | NO  | NA |       | 0  | 2  | Not-determined | Genome-fragment | NA    | 0     |
| S12_k141_214564                            | 1766  | NO  | NA |       | 0  | 1  | Not-determined | Genome-fragment | NA    | 0     |
| S12-final-viral-combined_k141_191002[full] | 3450  | NO  | NA |       | 1  | 0  | Low-quality    | Genome-fragment | 7.13  | 0     |
| S12_k141_110574                            | 5631  | NO  | NA |       | 0  | 5  | Not-determined | Genome-fragment | NA    | 0     |
| S12_k141_395357                            | 1112  | NO  | NA |       | 0  | 2  | Not-determined | Genome-fragment | NA    | 0     |
| S12_k141_126766                            | 1043  | NO  | NA |       | 0  | 1  | Not-determined | Genome-fragment | NA    | 0     |
| S12_k141_261445                            | 1084  | NO  | NA |       | 0  | 0  | Not-determined | Genome-fragment | NA    | 0     |
| S2-final-viral-combined_k141_82146[full]   | 3452  | NO  | NA |       | 0  | 0  | Low-quality    | Genome-fragment | 7.48  | 0     |
| S12_k141_395776                            | 4468  | NO  | NA |       | 0  | 2  | Not-determined | Genome-fragment | NA    | 0     |
| S12_k141_78526                             | 3768  | NO  | NA |       | 0  | 2  | Not-determined | Genome-fragment | NA    | 0     |
| S12_k141_360682                            | 2069  | NO  | NA |       | 0  | 1  | Not-determined | Genome-fragment | NA    | 0     |
| S12_k141_395885                            | 1138  | NO  | NA |       | 0  | 0  | Not-determined | Genome-fragment | NA    | 0     |
| S12_k141_211735                            | 1101  | NO  | NA |       | 0  | 1  | Not-determined | Genome-fragment | NA    | 0     |
| S12_k141_265492                            | 1152  | NO  | NA |       | 0  | 0  | Not-determined | Genome-fragment | NA    | 0     |
| S12_k141_2145761                           | 5055  | NO  | NA |       | 0  | 2  | Not-determined | Genome-fragment | NA    | 0     |
| S12_k141_161638                            | 1092  | NO  | NA |       | 0  | 0  | Not-determined | Genome-fragment | NA    | 0     |
| S12_k141_211771                            | 1011  | NO  | NA |       | 0  | 1  | Not-determined | Genome-fragment | NA    | 0     |
| S12_k141_2145105                           | 1211  | NO  | NA |       | 0  | 0  | Not-determined | Genome-fragment | NA    | 0     |
| S12_k141_379454                            | 1033  | NO  | NA |       | 0  | 1  | Not-determined | Genome-fragment | NA    | 0     |
| S12_k141_195159                            | 1158  | NO  | NA |       | 0  | 3  | Not-determined | Genome-fragment | NA    | 0     |
| S12_k141_279254                            | 1050  | NO  | NA |       | 0  | 0  | Not-determined | Genome-fragment | NA    | 0     |
| S12_k141_279240                            | 1486  | NO  | NA |       | 0  | 1  | Not-determined | Genome-fragment | NA    | 0     |
| S7-final-viral-combined_k141_17040[full]   | 3453  | NO  | NA |       | 1  | 0  | Low-quality    | Genome-fragment | 9.24  | 0     |
| S4-final-viral-combined_k141_88864[full]   | 3453  | NO  | NA |       | 0  | 0  | Low-quality    | Genome-fragment | 4.13  | 0     |
| S12_k141_29504                             | 1547  | NO  | NA |       | 0  | 1  | Not-determined | Genome-fragment | NA    | 9.24  |
| S12_k141_110692                            | 1149  | NO  | NA |       | 0  | 0  | Not-determined | Genome-fragment | NA    | 0     |
| S12_k141_261600                            | 1226  | NO  | NA |       | 0  | 0  | Not-determined | Genome-fragment | NA    | 0     |
| S12_k141_295680                            | 1128  | NO  | NA |       | 0  | 1  | Not-determined | Genome-fragment | NA    | 0     |
| S12_k141_279781                            | 1013  | NO  | NA |       | 0  | 1  | Not-determined | Genome-fragment | NA    | 0     |
| S12_k141_360794                            | 1790  | NO  | NA |       | 0  | 2  | Not-determined | Genome-fragment | NA    | 0     |
| S12_k141_178060                            | 1098  | NO  | NA |       | 0  | 1  | Not-determined | Genome-fragment | NA    | 0     |
| S12_k141_360805                            | 1708  | NO  | NA |       | 0  | 6  | Not-determined | Genome-fragment | NA    | 0     |
| S12_k141_360808                            | 1291  | NO  | NA |       | 0  | 1  | Not-determined | Genome-fragment | NA    | 0     |
| S12_k141_229277                            | 5076  | NO  | NA |       | 0  | 1  | Not-determined | Genome-fragment | NA    | 0     |
| S11-final-viral-combined_k141_18600[full]  | 3454  | NO  | NA |       | 3  | 1  | Low-quality    | Genome-fragment | 1.14  | 0     |
| S12_k141_45078                             | 5071  | NO  | NA |       | 0  | 1  | Not-determined | Genome-fragment | NA    | 0     |
| S7_k141_175086                             | 3456  | NO  | NA |       | 0  | 1  | Low-quality    | Genome-fragment | 1.86  | 0     |
| S12_k141_295993                            | 5071  | NO  | NA |       | 0  | 0  | Not-determined | Genome-fragment | NA    | 0     |
| S12_k141_261718                            | 1379  | NO  | NA |       | 0  | 1  | Not-determined | Genome-fragment | NA    | 0     |
| S12-final-viral-combined_k141_142586[full] | 3456  | NO  | NA |       | 0  | 2  | Low-quality    | Genome-fragment | 7.2   | 0     |
| S12_k141_45095                             | 1254  | NO  | NA |       | 0  | 1  | Not-determined | Genome-fragment | NA    | 1.4   |
| S12-final-viral-combined_k141_137879[full] | 3456  | NO  | NA |       | 2  | 0  | Low-quality    | Genome-fragment | 8.79  | 0     |
| S12_k141_144427                            | 1546  | NO  | NA |       | 0  | 1  | Not-determined | Genome-fragment | NA    | 7.2   |
| S12_k141_36119                             | 3456  | NO  | NA |       | 0  | 0  | Low-quality    | Genome-fragment | NA    | 5.73  |
| S12_k141_214518                            | 1032  | NO  | NA |       | 0  | 0  | Not-determined | Genome-fragment | NA    | 0     |
| S12_k141_45144                             | 45109 | NO  | NA |       | 0  | 1  | Not-determined | Genome-fragment | NA    | 0     |
| S12_k141_60894                             | 1265  | NO  | NA |       | 0  | 0  | Not-determined | Genome-fragment | NA    | 0     |
| S6-final-viral-combined_k141_129140[full]  | 3457  | NO  | NA |       | 0  | 3  | Low-quality    | Genome-fragment | NA    | 3.87  |
| S12_k141_127308                            | 10930 | NO  | NA |       | 0  | 5  | Not-determined | Genome-fragment | NA    | 0     |
| S8-final-viral-combined_k141_51977[full]   | 3457  | NO  | NA |       | 0  | 0  | Low-quality    | Genome-fragment | NA    | 4.37  |
| S12_k141_161756                            | 2061  | NO  | NA |       | 0  | 1  | Not-determined | Genome-fragment | NA    | 0     |
| S12_k141_395777                            | 3457  | NO  | NA |       | 0  | 0  | Low-quality    | Genome-fragment | NA    | 3.61  |
| S12_k141_396055                            | 1006  | NO  | NA |       | 0  | 1  | Not-determined | Genome-fragment | NA    | 0     |
| S12_k141_215941                            | 1206  | NO  | NA |       | 0  | 0  | Not-determined | Genome-fragment | NA    | 0     |
| S12_k141_214536                            | 1118  | NO  | NA |       | 0  | 1  | Not-determined | Genome-fragment | NA    | 0     |
| S12_k141_127111                            | 2132  | NO  | NA |       | 0  | 1  | Not-determined | Genome-fragment | NA    | 0     |
| S12_k141_345637                            | 1069  | NO  | NA |       | 0  | 1  | Not-determined | Genome-fragment | NA    | 0     |
| S12_k141_214543                            | 1196  | NO  | NA |       | 0  | 1  | Not-determined | Genome-fragment | NA    | 0     |
| S12_k141_127134                            | 1149  | NO  | NA |       | 0  | 1  | Not-determined | Genome-fragment | NA    | 0     |
| S7-final-viral-combined_k141_29776[full]   | 3458  | NO  | NA |       | 0  | 1  | Low-quality    | Genome-fragment | NA    | 8.77  |
| S12_k141_212018                            | 3466  | NO  | NA |       | 0  | 4  | Not-determined | Genome-fragment | NA    | 3.59  |
| S7-final-viral-combined_k141_130812[full]  | 3458  | NO  | NA |       | 0  | 0  | Low-quality    | Genome-fragment | NA    | 8.77  |
| S12_k141_195842                            | 1127  | NO  | NA |       | 0  | 0  | Not-determined | Genome-fragment | NA    | 0     |
| S12_k141_396139                            | 1867  | NO  | NA |       | 0  | 7  | Not-determined | Genome-fragment | NA    | 0     |
| S12_k141_214590                            | 1142  | NO  | NA |       | 0  | 2  | Not-determined | Genome-fragment | NA    | 0     |
| S12_k141_212075                            | 3649  | NO  | NA |       | 0  | 0  | Not-determined | Genome-fragment | NA    | 0     |
| S12_k141_212079                            |       |     |    |       |    |    |                |                 |       |       |



|                                            |       |     |      |    |    |                |                 |    |       |
|--------------------------------------------|-------|-----|------|----|----|----------------|-----------------|----|-------|
| S12_k141_346092                            | 3450  | No  | NA   | 0  | 3  | Not-determined | Genome-fragment | NA | 0     |
| S12_k141_127608                            | 1024  | No  | NA   | 0  | 2  | Not-determined | Genome-fragment | NA | 0     |
| S2-final-viral-combined_k141_192331  full  | 3460  | No  | NA   | 1  | 0  | Low-quality    | Genome-fragment | NA | 6.58  |
| S12_k141_10908                             | 3915  | No  | NA   | 0  | 2  | Not-determined | Genome-fragment | NA | 0     |
| S12_k141_245724                            | 1397  | No  | NA   | 0  | 1  | Not-determined | Genome-fragment | NA | 0     |
| S6_k141_48562                              | 3460  | No  | NA   | 1  | 0  | Low-quality    | Genome-fragment | NA | 10.36 |
| S12-final-viral-combined_k141_157295  full | 3462  | No  | NA   | 0  | 0  | Low-quality    | Genome-fragment | NA | 6.94  |
| S12_k141_196224                            | 1069  | No  | NA   | 0  | 1  | Not-determined | Genome-fragment | NA | 0     |
| S12_k141_51401                             | 5468  | No  | NA   | 0  | 2  | Not-determined | Genome-fragment | NA | 0     |
| S12_k141_380115                            | 6005  | No  | NA   | 0  | 3  | Not-determined | Genome-fragment | NA | 0     |
| S8_k141_69678                              | 3462  | No  | NA   | 2  | 0  | Low-quality    | Genome-fragment | NA | 5.74  |
| S12_k141_178677                            | 1376  | No  | NA   | 0  | 0  | Not-determined | Genome-fragment | NA | 0     |
| S9-final-viral-combined_k141_60288  full   | 3463  | Yes | 1706 | 1  | 1  | Low-quality    | Genome-fragment | NA | 2.11  |
| S12_k141_10992                             | 1024  | No  | NA   | 0  | 0  | Not-determined | Genome-fragment | NA | 0     |
| S7-final-viral-combined_k141_79760  full   | 3463  | No  | NA   | 0  | 1  | Low-quality    | Genome-fragment | NA | 7.08  |
| S3-final-viral-combined_k141_120835  full  | 3464  | No  | NA   | 0  | 0  | Low-quality    | Genome-fragment | NA | 9.16  |
| S1_k141_274652                             | 3465  | Yes | 1968 | 1  | 2  | Low-quality    | Genome-fragment | NA | 3.28  |
| S2_k141_85479                              | 3465  | No  | NA   | 0  | 0  | Low-quality    | Genome-fragment | NA | 5.05  |
| S12_k141_296477                            | 1258  | No  | NA   | 0  | 0  | Not-determined | Genome-fragment | NA | 0     |
| S12_k141_380179                            | 1805  | No  | NA   | 0  | 1  | Not-determined | Genome-fragment | NA | 0     |
| S12_k141_144950                            | 1463  | No  | NA   | 0  | 3  | Not-determined | Genome-fragment | NA | 0     |
| S12_k141_11028                             | 1516  | No  | NA   | 0  | 2  | Not-determined | Genome-fragment | NA | 0     |
| S12_k141_111269                            | 1264  | No  | NA   | 0  | 1  | Not-determined | Genome-fragment | NA | 0     |
| S12_k141_346180                            | 2070  | No  | NA   | 0  | 0  | Not-determined | Genome-fragment | NA | 0     |
| S12_k141_162403                            | 3558  | No  | NA   | 0  | 1  | Not-determined | Genome-fragment | NA | 0     |
| S12_k141_346201                            | 1514  | No  | NA   | 0  | 1  | Not-determined | Genome-fragment | NA | 0     |
| S11-final-viral-combined_k141_246810  full | 3467  | No  | NA   | 1  | 0  | Low-quality    | Genome-fragment | NA | 2.58  |
| S17-final-viral-combined_k141_224051  full | 3468  | No  | NA   | 0  | 0  | Low-quality    | Genome-fragment | NA | 8.04  |
| S12_k141_145014                            | 1203  | No  | NA   | 0  | 1  | Not-determined | Genome-fragment | NA | 0     |
| S12_k141_212562                            | 1404  | No  | NA   | 0  | 1  | Not-determined | Genome-fragment | NA | 0     |
| S4-final-viral-combined_k141_158011  full  | 3468  | No  | NA   | 0  | 2  | Low-quality    | Genome-fragment | NA | 3.1   |
| S4_k141_144421                             | 3468  | No  | NA   | 0  | 3  | Low-quality    | Genome-fragment | NA | 1.72  |
| S12_k141_296529                            | 2097  | No  | NA   | 0  | 0  | Not-determined | Genome-fragment | NA | 0     |
| S12_k141_145046                            | 1822  | No  | NA   | 0  | 0  | Not-determined | Genome-fragment | NA | 0     |
| S12_k141_380227                            | 1053  | No  | NA   | 0  | 1  | Not-determined | Genome-fragment | NA | 0     |
| S12_k141_363516                            | 1097  | No  | NA   | 0  | 1  | Not-determined | Genome-fragment | NA | 0     |
| S12_k141_94795                             | 1021  | No  | NA   | 0  | 1  | Not-determined | Genome-fragment | NA | 0     |
| S9-final-viral-combined_k141_82458  H2gene | 3469  | No  | NA   | 2  | 0  | Low-quality    | Genome-fragment | NA | 8.63  |
| S12_k141_111370                            | 3014  | No  | NA   | 0  | 0  | Not-determined | Genome-fragment | NA | 0     |
| S12_k141_280040                            | 7414  | No  | NA   | 0  | 2  | Not-determined | Genome-fragment | NA | 0     |
| S12-final-viral-combined_k141_12228  full  | 3469  | No  | NA   | 0  | 0  | Low-quality    | Genome-fragment | NA | 7.97  |
| S4_k141_10110                              | 3469  | No  | NA   | 0  | 1  | Low-quality    | Genome-fragment | NA | 6.65  |
| S12_k141_45727                             | 5609  | No  | NA   | 0  | 5  | Not-determined | Genome-fragment | NA | 0     |
| S12_k141_346258                            | 4814  | No  | NA   | 0  | 2  | Not-determined | Genome-fragment | NA | 0     |
| S12_k141_196342                            | 1063  | No  | NA   | 0  | 0  | Not-determined | Genome-fragment | NA | 0     |
| S4_k141_25923                              | 3469  | No  | NA   | 0  | 2  | Low-quality    | Genome-fragment | NA | 19.31 |
| S12_k141_280094                            | 3388  | No  | NA   | 0  | 2  | Not-determined | Genome-fragment | NA | 0     |
| S12_k141_944828                            | 1076  | No  | NA   | 0  | 0  | Not-determined | Genome-fragment | NA | 0     |
| S12_k141_457763                            | 1298  | No  | NA   | 0  | 1  | Not-determined | Genome-fragment | NA | 0     |
| S12_k141_162519                            | 1026  | No  | NA   | 0  | 0  | Not-determined | Genome-fragment | NA | 0     |
| S12_k141_111457                            | 1279  | No  | NA   | 0  | 1  | Not-determined | Genome-fragment | NA | 0     |
| S5_k141_26641                              | 3470  | No  | NA   | 4  | 0  | Not-determined | Genome-fragment | NA | 10.86 |
| S12_k141_289576                            | 3470  | No  | NA   | 4  | 0  | Low-quality    | Genome-fragment | NA | 8.2   |
| S12_k141_111461                            | 4358  | No  | NA   | 0  | 3  | Not-determined | Genome-fragment | NA | 0     |
| S12_k141_296603                            | 3368  | No  | NA   | 0  | 2  | Not-determined | Genome-fragment | NA | 0     |
| S8-final-viral-combined_k141_245434  full  | 3470  | No  | NA   | 0  | 2  | Low-quality    | Genome-fragment | NA | 2.8   |
| S12_k141_396859                            | 3757  | No  | NA   | 0  | 1  | Not-determined | Genome-fragment | NA | 0     |
| S9-final-viral-combined_k141_84816  full   | 3471  | No  | NA   | 1  | 0  | Low-quality    | Genome-fragment | NA | 24.54 |
| S12_k141_396875                            | 2464  | No  | NA   | 0  | 1  | Not-determined | Genome-fragment | NA | 0     |
| S12_k141_79300                             | 1543  | No  | NA   | 0  | 2  | Not-determined | Genome-fragment | NA | 0     |
| S12_k141_262501                            | 1047  | No  | NA   | 0  | 0  | Not-determined | Genome-fragment | NA | 0     |
| S12_k141_346363                            | 1919  | No  | NA   | 0  | 0  | Not-determined | Genome-fragment | NA | 0     |
| S12_k141_296628                            | 1009  | No  | NA   | 0  | 1  | Not-determined | Genome-fragment | NA | 0     |
| S5-final-viral-combined_k141_196663  full  | 3471  | No  | NA   | 0  | 0  | Low-quality    | Genome-fragment | NA | 5.16  |
| S12-final-viral-combined_k141_48996  full  | 3471  | No  | NA   | 0  | 2  | Low-quality    | Genome-fragment | NA | 4.24  |
| S12_k141_212728                            | 1521  | No  | NA   | 0  | 0  | Not-determined | Genome-fragment | NA | 0     |
| S12_k141_245929                            | 1407  | No  | NA   | 0  | 1  | Not-determined | Genome-fragment | NA | 0     |
| S12_k141_262550                            | 1120  | No  | NA   | 0  | 1  | Not-determined | Genome-fragment | NA | 0     |
| S12_k141_127888                            | 1011  | No  | NA   | 0  | 1  | Not-determined | Genome-fragment | NA | 0     |
| S11-final-viral-combined_k141_63951  full  | 3472  | No  | NA   | 0  | 0  | Low-quality    | Genome-fragment | NA | 6.76  |
| S5-final-viral-combined_k141_171576  full  | 3472  | No  | NA   | 2  | 0  | Low-quality    | Genome-fragment | NA | 3.67  |
| S12_k141_296714                            | 1270  | No  | NA   | 1  | 1  | Not-determined | Genome-fragment | NA | 0     |
| S12_k141_296736                            | 1018  | No  | NA   | 0  | 0  | Not-determined | Genome-fragment | NA | 0     |
| S12_k141_95026                             | 1070  | No  | NA   | 0  | 1  | Not-determined | Genome-fragment | NA | 0     |
| S12_k141_262602                            | 1021  | No  | NA   | 0  | 0  | Not-determined | Genome-fragment | NA | 0     |
| S12_k141_179067                            | 1147  | No  | NA   | 0  | 0  | Not-determined | Genome-fragment | NA | 0     |
| S12_k141_230128                            | 3477  | No  | NA   | 0  | 1  | Not-determined | Genome-fragment | NA | 0     |
| S2-final-viral-combined_k141_164749  full  | 3472  | No  | NA   | 0  | 3  | Low-quality    | Genome-fragment | NA | 4.14  |
| S12_k141_28307                             | 1843  | No  | NA   | 0  | 2  | Not-determined | Genome-fragment | NA | 0     |
| S12_k141_230145                            | 1070  | No  | NA   | 0  | 1  | Not-determined | Genome-fragment | NA | 0     |
| S8_k141_122355                             | 3472  | No  | NA   | 0  | 0  | Low-quality    | Genome-fragment | NA | 7.47  |
| S12_k141_111300                            | 5572  | No  | NA   | 13 | 1  | Not-determined | Genome-fragment | NA | 0     |
| S12_k141_212830                            | 1188  | No  | NA   | 0  | 1  | Not-determined | Genome-fragment | NA | 0     |
| S12_k141_280299                            | 1018  | No  | NA   | 0  | 1  | Not-determined | Genome-fragment | NA | 0     |
| S12_k141_46051                             | 1003  | No  | NA   | 0  | 1  | Not-determined | Genome-fragment | NA | 0     |
| S12_k141_45955                             | 3615  | No  | NA   | 0  | 1  | Not-determined | Genome-fragment | NA | 0     |
| S12_k141_11319                             | 1259  | No  | NA   | 0  | 0  | Not-determined | Genome-fragment | NA | 0     |
| S12_k141_01748                             | 1842  | No  | NA   | 0  | 0  | Not-determined | Genome-fragment | NA | 0     |
| S12_k141_230155                            | 3469  | No  | NA   | 0  | 0  | Not-determined | Genome-fragment | NA | 0     |
| S12_k141_262678                            | 1210  | No  | NA   | 0  | 0  | Not-determined | Genome-fragment | NA | 0     |
| S12_k141_230218                            | 1014  | No  | NA   | 0  | 0  | Not-determined | Genome-fragment | NA | 0     |
| S12_k141_296834                            | 1062  | No  | NA   | 0  | 1  | Not-determined | Genome-fragment | NA | 0     |
| S12_k141_329939                            | 2146  | No  | NA   | 0  | 1  | Not-determined | Genome-fragment | NA | 0     |
| S12_k141_128138                            | 1365  | No  | NA   | 0  | 0  | Not-determined | Genome-fragment | NA | 0     |
| S12_k141_296852                            | 1395  | No  | NA   | 0  | 0  | Not-determined | Genome-fragment | NA | 0     |
| S8-final-viral-combined_k141_52202  full   | 3473  | No  | NA   | 0  | 2  | Low-quality    | Genome-fragment | NA | 2.4   |
| S1-final-viral-combined_k141_363128  full  | 3474  | No  | NA   | 0  | 0  | Low-quality    | Genome-fragment | NA | 6.98  |
| S12_k141_121818                            | 1894  | No  | NA   | 0  | 0  | Not-determined | Genome-fragment | NA | 0     |
| S12_k141_130009                            | 1152  | No  | NA   | 0  | 1  | Not-determined | Genome-fragment | NA | 0     |
| S12_k141_196457                            | 1017  | No  | NA   | 0  | 0  | Not-determined | Genome-fragment | NA | 0     |
| S12_k141_79410                             | 11566 | No  | NA   | 0  | 9  | Not-determined | Genome-fragment | NA | 0     |
| S12_k141_46100                             | 2381  | No  | NA   | 0  | 1  | Not-determined | Genome-fragment | NA | 0     |
| S12_k141_145424                            | 21494 | No  | NA   | 0  | 16 | Not-determined | Genome-fragment | NA | 0     |
| S12_k141_380569                            | 1143  | No  | NA   | 0  | 1  | Not-determined | Genome-fragment | NA | 0     |
| S1-final-viral-combined_k141_131600  full  | 3474  | No  | NA   | 0  | 0  | Low-quality    | Genome-fragment | NA | 2.2   |
| S12_k141_196503                            | 3285  | No  | NA   | 0  | 2  | Not-determined | Genome-fragment | NA | 0     |
| S12_k141_162739                            | 1920  | No  | NA   | 0  | 0  | Not-determined | Genome-fragment | NA | 0     |
| S12_k141_280425                            | 1808  | No  | NA   | 0  | 1  | Not-determined | Genome-fragment | NA | 0     |
| S12_k141_79456                             | 1779  | No  | NA   | 0  | 0  | Not-determined | Genome-fragment | NA | 0     |
| S12_k141_280446                            | 1409  | No  | NA   | 0  | 0  | Not-determined | Genome-fragment | NA | 0     |
| S12_k141_310087                            | 1085  | No  | NA   | 0  | 0  | Not-determined | Genome-fragment | NA | 0     |
| S12_k141_46162                             | 1005  | No  | NA   | 0  | 0  | Not-determined | Genome-fragment | NA | 0     |
| S12_k141_330109                            | 1339  | No  | NA   | 0  | 1  | Not-determined | Genome-fragment | NA | 0     |
| S12_k141_179244                            | 2142  | No  | NA   | 0  | 2  | Not-determined | Genome-fragment | NA | 0     |
| S8-final-viral-combined_k141_45371  full   | 3474  | No  | NA   | 0  | 0  | Low-quality    | Genome-fragment | NA | 2.35  |
| S12_k141_280486                            | 1601  | No  | NA   | 0  | 0  | Not-determined | Genome-fragment | NA | 0     |
| S12_k141_79543                             | 2090  | No  | NA   | 0  | 1  | Not-determined | Genome-fragment | NA | 0     |
| S12_k141_61963                             | 8069  | No  | NA   | 0  | 1  | Not-determined | Genome-fragment | NA | 0     |
| S11-final-viral-combined_k141_23122  full  | 3476  | No  | NA   | 1  | 0  | Low-quality    | Genome-fragment | NA | 6.64  |
| S12_k141_361917                            | 1132  | No  | NA   | 0  | 0  | Not-determined | Genome-fragment | NA | 0     |
| S12_k141_46222                             | 1087  | No  | NA   | 0  | 0  | Not-determined | Genome-fragment | NA | 0     |
| S12_k141_297009                            | 2004  | No  | NA   | 0  | 1  | Not-determined | Genome-fragment | NA | 0     |
| S12_k141_145550                            | 2076  | No  | NA   | 0  | 1  | Not-determined | Genome-fragment | NA | 0     |
| S11-final-viral-combined_k141_107797  full | 3476  | No  | NA   | 0  | 2  | Low-quality    | Genome-fragment | NA | 3.17  |
| S5-final-viral-combined_k141_147723  full  | 3476  | No  | NA   | 0  | 0  | Low-quality    | Genome-fragment | NA | 2.38  |
| S12_k141_262894                            | 4449  | No  | NA   | 0  | 4  | Not-determined | Genome-fragment | NA | 0     |
| S12_k141_314494                            | 1337  | No  | NA   | 0  | 0  | Not-determined | Genome-fragment | NA | 0     |
| S6-final-viral-combined_k141_88710  full   | 3476  | No  | NA   | 0  | 0  | Low-quality    | Genome-fragment | NA | 9.08  |
| S12_k141_46291                             | 1003  | No  | NA   | 0  | 0  | Not-determined | Genome-fragment | NA | 0     |
| S8-final-viral-combined_k141_164489  full  | 3476  | No  | NA   | 3  | 0  | Low-quality    | Genome-fragment | NA | 8.36  |
| S12_k141_297063                            | 1350  | No  | NA   | 0  | 2  | Not-determined | Genome-fragment | NA | 6.68  |
| S12_k141_130412                            | 3477  | No  | NA   | 0  | 0  | Low-quality    | Genome-fragment | NA | 1.69  |
| S8-final-viral-combined_k141_109360  full  | 3477  | No  | NA   | 0  | 1  | Low-quality    | Genome-fragment | NA | 0     |
| S12_k141_95416                             | 3220  | No  | NA   | 0  | 1  | Not-determined | Genome-fragment | NA | 0     |
| S12_k141_145661                            | 1016  | No  | NA   | 0  | 1  | Not-determined | Genome-fragment | NA | 0     |
| S12_k141_213107                            | 1040  | No  | NA   | 0  | 0  | Not-determined | Genome-fragment | NA | 0     |
| S12_k141_95442                             | 1632  | No  | NA   | 0  | 1  | Not-determined | Genome-fragment | NA | 0     |
| S12_k141_62103                             | 5658  | No  | NA   | 0  | 3  | Not-determined | Genome-fragment | NA | 0     |
| S12_k141_179388                            | 45584 | No  | NA   | 15 | 0  | High-quality   | High-quality    | NA | 99.32 |
| S12_k141_361977                            | 1194  | No  | NA   | 0  | 1  | Not-determined | Genome-fragment | NA | 0     |
| S12_k141_314576                            | 3127  | No  | NA   | 0  | 3  | Not-determined | Genome-fragment | NA | 0     |
| S12_k141_380704                            | 1150  | No  | NA   | 0  | 0  | Not-determined | Genome-fragment | NA | 0     |
| S1-final-viral-combined_k141_341146  full  | 3478  | No  | NA   | 0  | 1  | Low-quality    | Genome-fragment | NA | 25.88 |
| S12_k141_314580                            | 4790  | No  | NA   | 0  | 0  | Not-determined | Genome-fragment | NA | 0     |
| S12_k14                                    |       |     |      |    |    |                |                 |    |       |



|                                            |      |     |      |   |   |                  |                 |       |       |
|--------------------------------------------|------|-----|------|---|---|------------------|-----------------|-------|-------|
| S12_k141_79867                             | 1862 | No  | NA   | 0 | 1 | Not-determined   | Genome-fragment | NA    | 0     |
| S12_k141_360832                            | 1050 | No  | NA   | 0 | 0 | Not-determined   | Genome-fragment | NA    | 0     |
| S17-final-viral-combined_k141_37510  full  | 3483 | Yes | 2756 | 2 | 0 | Low-quality      | Genome-fragment | 4.29  | 20.87 |
| S12_k141_46574                             | 1315 | No  | NA   | 0 | 0 | 1 Not-determined | Genome-fragment | NA    | 0     |
| S12_k141_179642                            | 1799 | No  | NA   | 0 | 0 | 1 Not-determined | Genome-fragment | NA    | 0     |
| S12_k141_79894                             | 3417 | No  | NA   | 0 | 0 | 1 Not-determined | Genome-fragment | NA    | 0     |
| S12_k141_263186                            | 1061 | No  | NA   | 0 | 0 | 1 Not-determined | Genome-fragment | NA    | 0     |
| S12_k141_11801                             | 3045 | No  | NA   | 0 | 0 | 2 Not-determined | Genome-fragment | NA    | 0     |
| S12_k141_314707                            | 1125 | No  | NA   | 0 | 0 | 1 Not-determined | Genome-fragment | NA    | 0     |
| S12_k141_397369                            | 2978 | No  | NA   | 0 | 0 | 3 Not-determined | Genome-fragment | NA    | 0     |
| S12_k141_213422                            | 1847 | No  | NA   | 0 | 0 | 1 Not-determined | Genome-fragment | NA    | 0     |
| S1-final-viral-combined_k141_378608  full  | 3484 | No  | NA   | 0 | 0 | 1 Low-quality    | Genome-fragment | 7.62  | 0     |
| S5_k141_164925                             | 3484 | No  | NA   | 7 | 0 | 0 Low-quality    | Genome-fragment | 15.9  | 0     |
| S12_k141_145876                            | 2000 | No  | NA   | 0 | 0 | 2 Not-determined | Genome-fragment | NA    | 0     |
| S1_k141_72421                              | 3485 | No  | NA   | 1 | 0 | 0 Low-quality    | Genome-fragment | 8.78  | 0     |
| S6-final-viral-combined_k141_89406  full   | 3485 | No  | NA   | 1 | 0 | 0 Low-quality    | Genome-fragment | 8.14  | 0     |
| S12_k141_145905                            | 1216 | No  | NA   | 0 | 0 | 1 Not-determined | Genome-fragment | NA    | 0     |
| S7_k141_44374                              | 3486 | Yes | 2659 | 1 | 0 | 1 Low-quality    | Genome-fragment | 5.4   | 23.72 |
| S12_k141_260956                            | 4675 | No  | NA   | 0 | 0 | 0 Not-determined | Genome-fragment | NA    | 0     |
| S12_k141_196924                            | 1347 | No  | NA   | 0 | 0 | 3 Not-determined | Genome-fragment | NA    | 0     |
| S17-k141_216420                            | 3486 | No  | NA   | 1 | 0 | 0 Low-quality    | Genome-fragment | 2.59  | 0     |
| S12_k141_260963                            | 1218 | No  | NA   | 0 | 0 | 2 Not-determined | Genome-fragment | NA    | 0     |
| S12-final-viral-combined_k141_75682  full  | 3486 | No  | NA   | 1 | 0 | 0 Low-quality    | Genome-fragment | 4.36  | 0     |
| S4-final-viral-combined_k141_9728  full    | 3486 | No  | NA   | 0 | 0 | 1 Low-quality    | Genome-fragment | 7.02  | 0     |
| S8-final-viral-combined_k141_74458  full   | 3487 | Yes | 1617 | 1 | 2 | Low-quality      | Genome-fragment | 0.79  | 53.63 |
| S11-final-viral-combined_k141_156992  full | 3487 | No  | NA   | 0 | 0 | 0 Low-quality    | Genome-fragment | 7.55  | 0     |
| S12_k141_281013                            | 9649 | No  | NA   | 0 | 0 | 1 Not-determined | Genome-fragment | NA    | 0     |
| S12_k141_263287                            | 1541 | No  | NA   | 0 | 0 | 0 Not-determined | Genome-fragment | NA    | 0     |
| S12_k141_263290                            | 4058 | No  | NA   | 0 | 0 | 0 Not-determined | Genome-fragment | NA    | 0     |
| S12_k141_397477                            | 1017 | No  | NA   | 0 | 0 | 0 Not-determined | Genome-fragment | NA    | 0     |
| S12_k141_347313                            | 1472 | No  | NA   | 0 | 0 | 1 Not-determined | Genome-fragment | NA    | 0     |
| S5-final-viral-combined_k141_93762  full   | 3488 | No  | NA   | 0 | 0 | 0 Low-quality    | Genome-fragment | 5.49  | 0     |
| S12_k141_297467                            | 1630 | No  | NA   | 0 | 0 | 1 Not-determined | Genome-fragment | NA    | 0     |
| S12_k141_11962                             | 3469 | No  | NA   | 0 | 0 | 1 Not-determined | Genome-fragment | NA    | 0     |
| S7_k141_137740                             | 3488 | No  | NA   | 0 | 0 | 2 Low-quality    | Genome-fragment | 1.65  | 0     |
| S12-final-viral-combined_k141_102157  full | 3488 | No  | NA   | 0 | 0 | 2 Low-quality    | Genome-fragment | 2.13  | 0     |
| S12_k141_347337                            | 3333 | No  | NA   | 0 | 0 | 1 Not-determined | Genome-fragment | NA    | 0     |
| S12_k141_95700                             | 1837 | No  | NA   | 0 | 0 | 0 Not-determined | Genome-fragment | NA    | 0     |
| S12_k141_347347                            | 3071 | No  | NA   | 0 | 0 | 0 Not-determined | Genome-fragment | NA    | 0     |
| S12_k141_314882                            | 1072 | No  | NA   | 0 | 0 | 0 Not-determined | Genome-fragment | NA    | 0     |
| S11-final-viral-combined_k141_243513  full | 3489 | No  | NA   | 0 | 0 | 3 Low-quality    | Genome-fragment | 2.15  | 0     |
| S12_k141_362394                            | 2422 | No  | NA   | 0 | 0 | 0 Not-determined | Genome-fragment | NA    | 0     |
| S12_k141_28952                             | 4586 | No  | NA   | 0 | 0 | 5 Not-determined | Genome-fragment | NA    | 0     |
| S1_k141_293423                             | 3490 | No  | NA   | 0 | 0 | 2 Low-quality    | Genome-fragment | 1.69  | 0     |
| S12_k141_118911                            | 1052 | No  | NA   | 0 | 0 | 0 Not-determined | Genome-fragment | NA    | 0     |
| S12-final-viral-combined_k141_75237  full  | 3490 | No  | NA   | 2 | 0 | 0 Low-quality    | Genome-fragment | 9.62  | 0     |
| S12_k141_197033                            | 1209 | No  | NA   | 0 | 0 | 0 Not-determined | Genome-fragment | NA    | 0     |
| S12_k141_397534                            | 2006 | No  | NA   | 0 | 0 | 1 Not-determined | Genome-fragment | NA    | 0     |
| S12_k141_347429                            | 1302 | No  | NA   | 0 | 0 | 1 Not-determined | Genome-fragment | NA    | 0     |
| S12_k141_281147                            | 1146 | No  | NA   | 0 | 0 | 1 Not-determined | Genome-fragment | NA    | 0     |
| S12_k141_128926                            | 2124 | No  | NA   | 0 | 0 | 1 Not-determined | Genome-fragment | NA    | 0     |
| S12_k141_180047                            | 3877 | No  | NA   | 0 | 0 | 5 Not-determined | Genome-fragment | NA    | 0     |
| S12_k141_128943                            | 1164 | No  | NA   | 0 | 0 | 0 Not-determined | Genome-fragment | NA    | 0     |
| S12_k141_381057                            | 1057 | No  | NA   | 0 | 0 | 1 Not-determined | Genome-fragment | NA    | 0     |
| S12_k141_112259                            | 2065 | No  | NA   | 0 | 0 | 0 Not-determined | Genome-fragment | NA    | 0     |
| S12_k141_61658                             | 1409 | No  | NA   | 0 | 0 | 2 Not-determined | Genome-fragment | NA    | 0     |
| S12_k141_397659                            | 1107 | No  | NA   | 0 | 0 | 1 Not-determined | Genome-fragment | NA    | 0     |
| S12_k141_246754                            | 1305 | No  | NA   | 0 | 0 | 1 Not-determined | Genome-fragment | NA    | 0     |
| S12_k141_180130                            | 1274 | No  | NA   | 0 | 0 | 0 Not-determined | Genome-fragment | NA    | 0     |
| S12_k141_213706                            | 4020 | No  | NA   | 0 | 0 | 0 Not-determined | Genome-fragment | NA    | 0     |
| S12_k141_62719                             | 1356 | No  | NA   | 0 | 0 | 1 Not-determined | Genome-fragment | NA    | 0     |
| S12_k141_29105                             | 1162 | No  | NA   | 0 | 0 | 1 Not-determined | Genome-fragment | NA    | 0     |
| S12_k141_146249                            | 1006 | No  | NA   | 0 | 0 | 0 Not-determined | Genome-fragment | NA    | 0     |
| S12_k141_263441                            | 2332 | No  | NA   | 0 | 0 | 1 Not-determined | Genome-fragment | NA    | 0     |
| S12_k141_180149                            | 7935 | No  | NA   | 0 | 0 | 2 Not-determined | Genome-fragment | NA    | 0     |
| S12_k141_29147                             | 3299 | No  | NA   | 0 | 0 | 0 Not-determined | Genome-fragment | NA    | 0     |
| S7-final-viral-combined_k141_286010  full  | 3491 | No  | NA   | 0 | 0 | 3 Low-quality    | Genome-fragment | 1.86  | 0     |
| S12_k141_95987                             | 1493 | No  | NA   | 0 | 0 | 3 Not-determined | Genome-fragment | NA    | 0     |
| S12_k141_315144                            | 1637 | No  | NA   | 0 | 0 | 0 Not-determined | Genome-fragment | NA    | 0     |
| S12_k141_281327                            | 4861 | No  | NA   | 0 | 0 | 2 Not-determined | Genome-fragment | NA    | 0     |
| S12_k141_315165                            | 1248 | No  | NA   | 0 | 0 | 0 Not-determined | Genome-fragment | NA    | 0     |
| S12_k141_263487                            | 3840 | No  | NA   | 0 | 0 | 2 Not-determined | Genome-fragment | NA    | 0     |
| S12_k141_146310                            | 1082 | No  | NA   | 0 | 0 | 1 Not-determined | Genome-fragment | NA    | 0     |
| S12_k141_80304                             | 1746 | No  | NA   | 0 | 0 | 1 Not-determined | Genome-fragment | NA    | 0     |
| S12_k141_121204                            | 6819 | No  | NA   | 0 | 0 | 3 Not-determined | Genome-fragment | NA    | 0     |
| S12_k141_230861                            | 1461 | No  | NA   | 0 | 0 | 1 Not-determined | Genome-fragment | NA    | 0     |
| S12_k141_47064                             | 1217 | No  | NA   | 0 | 0 | 1 Not-determined | Genome-fragment | NA    | 0     |
| S12-final-viral-combined_k141_377776  full | 3491 | No  | NA   | 2 | 0 | 0 Low-quality    | Genome-fragment | 7.65  | 0     |
| S12_k141_315203                            | 1758 | No  | NA   | 0 | 0 | 1 Not-determined | Genome-fragment | NA    | 0     |
| S12_k141_381194                            | 1164 | No  | NA   | 0 | 0 | 1 Not-determined | Genome-fragment | NA    | 0     |
| S12_k141_263532                            | 2983 | No  | NA   | 0 | 0 | 1 Not-determined | Genome-fragment | NA    | 0     |
| S12_k141_127239                            | 3011 | No  | NA   | 0 | 0 | 0 Not-determined | Genome-fragment | NA    | 0     |
| S12_k141_29216                             | 4468 | No  | NA   | 0 | 0 | 0 Not-determined | Genome-fragment | NA    | 0     |
| S7-final-viral-combined_k141_119820  full  | 3492 | No  | NA   | 0 | 0 | 3 Low-quality    | Genome-fragment | 2.04  | 0     |
| S12_k141_297652                            | 2522 | No  | NA   | 0 | 0 | 2 Not-determined | Genome-fragment | NA    | 0     |
| S5-final-viral-combined_k141_69601  full   | 3493 | No  | NA   | 4 | 0 | 0 Low-quality    | Genome-fragment | 9.27  | 0     |
| S12_k141_397827                            | 1314 | No  | NA   | 0 | 0 | 3 Not-determined | Genome-fragment | NA    | 0     |
| S12_k141_246897                            | 1151 | No  | NA   | 0 | 0 | 1 Not-determined | Genome-fragment | NA    | 0     |
| S8_k141_241103                             | 3493 | No  | NA   | 1 | 0 | 0 Low-quality    | Genome-fragment | 6.34  | 0     |
| S12_k141_180258                            | 1137 | No  | NA   | 0 | 0 | 1 Not-determined | Genome-fragment | NA    | 0     |
| S12_k141_230966                            | 1099 | No  | NA   | 0 | 0 | 2 Not-determined | Genome-fragment | NA    | 0     |
| S12_k141_347683                            | 1163 | No  | NA   | 0 | 0 | 0 Not-determined | Genome-fragment | NA    | 0     |
| S12_k141_96120                             | 1005 | No  | NA   | 0 | 0 | 2 Not-determined | Genome-fragment | NA    | 0     |
| S12_k141_347702                            | 1646 | No  | NA   | 0 | 0 | 2 Not-determined | Genome-fragment | NA    | 0     |
| S12_k141_347714                            | 1210 | No  | NA   | 0 | 0 | 0 Not-determined | Genome-fragment | NA    | 0     |
| S12_k141_163715                            | 1790 | No  | NA   | 0 | 0 | 1 Not-determined | Genome-fragment | NA    | 0     |
| S12_k141_180306                            | 1816 | No  | NA   | 0 | 0 | 0 Not-determined | Genome-fragment | NA    | 0     |
| S12_k141_161741                            | 1791 | No  | NA   | 0 | 0 | 1 Not-determined | Genome-fragment | NA    | 0     |
| S12_k141_231034                            | 3025 | No  | NA   | 0 | 0 | 1 Not-determined | Genome-fragment | NA    | 0     |
| S12_k141_96186                             | 1285 | No  | NA   | 0 | 0 | 1 Not-determined | Genome-fragment | NA    | 0     |
| S5_k141_53973                              | 3494 | No  | NA   | 0 | 0 | 2 Low-quality    | Genome-fragment | 2.27  | 0     |
| S12_k141_347739                            | 4616 | No  | NA   | 0 | 0 | 1 Not-determined | Genome-fragment | NA    | 0     |
| S12_k141_197362                            | 2504 | No  | NA   | 0 | 0 | 0 Not-determined | Genome-fragment | NA    | 0     |
| S12_k141_315368                            | 3460 | No  | NA   | 0 | 0 | 4 Not-determined | Genome-fragment | NA    | 0     |
| S12_k141_281520                            | 1986 | No  | NA   | 0 | 0 | 2 Not-determined | Genome-fragment | NA    | 0     |
| S9-final-viral-combined_k141_55574  full   | 3495 | No  | NA   | 0 | 0 | 2 Low-quality    | Genome-fragment | 4.79  | 0     |
| S12_k141_96212                             | 1163 | No  | NA   | 0 | 0 | 1 Not-determined | Genome-fragment | NA    | 0     |
| S12_k141_80418                             | 1704 | No  | NA   | 0 | 0 | 1 Not-determined | Genome-fragment | NA    | 0     |
| S12_k141_80421                             | 1207 | No  | NA   | 0 | 0 | 2 Not-determined | Genome-fragment | NA    | 0     |
| S12_k141_231096                            | 2859 | No  | NA   | 0 | 0 | 2 Not-determined | Genome-fragment | NA    | 0     |
| S12_k141_96125                             | 3309 | No  | NA   | 0 | 0 | 3 Not-determined | Genome-fragment | NA    | 0     |
| S12_k141_247016                            | 2504 | No  | NA   | 0 | 0 | 0 Not-determined | Genome-fragment | NA    | 0     |
| S12_k141_347811                            | 2049 | No  | NA   | 0 | 0 | 0 Not-determined | Genome-fragment | NA    | 0     |
| S12_k141_96238                             | 1595 | No  | NA   | 0 | 0 | 1 Not-determined | Genome-fragment | NA    | 0     |
| S12_k141_347820                            | 1012 | No  | NA   | 0 | 0 | 1 Not-determined | Genome-fragment | NA    | 0     |
| S12_k141_96250                             | 1702 | No  | NA   | 0 | 0 | 2 Not-determined | Genome-fragment | NA    | 0     |
| S12_k141_12464                             | 1285 | No  | NA   | 0 | 0 | 1 Not-determined | Genome-fragment | NA    | 0     |
| S2_k141_168482                             | 3495 | No  | NA   | 0 | 0 | 2 Low-quality    | Genome-fragment | 28.24 | 0     |
| S12_k141_180375                            | 1729 | No  | NA   | 0 | 0 | 1 Not-determined | Genome-fragment | NA    | 0     |
| S12_k141_331106                            | 2368 | No  | NA   | 0 | 0 | 1 Not-determined | Genome-fragment | NA    | 0     |
| S12_k141_231550                            | 1545 | No  | NA   | 0 | 0 | 1 Not-determined | Genome-fragment | NA    | 0     |
| S12_k141_397837                            | 1015 | No  | NA   | 0 | 0 | 1 Not-determined | Genome-fragment | NA    | 0     |
| S2_k141_57282                              | 3495 | No  | NA   | 0 | 0 | 3 Low-quality    | Genome-fragment | 1.61  | 0     |
| S8_k141_164020                             | 3495 | No  | NA   | 0 | 0 | 0 Low-quality    | Genome-fragment | 3.64  | 0     |
| S12_k141_213980                            | 1187 | No  | NA   | 0 | 0 | 0 Not-determined | Genome-fragment | NA    | 0     |
| S12_k141_397958                            | 1190 | No  | NA   | 0 | 0 | 2 Not-determined | Genome-fragment | NA    | 0     |
| S12_k141_231194                            | 1334 | No  | NA   | 0 | 0 | 1 Not-determined | Genome-fragment | NA    | 0     |
| S12_k141_29375                             | 1835 | No  | NA   | 0 | 0 | 1 Not-determined | Genome-fragment | NA    | 0     |
| S12_k141_62950                             | 1330 | No  | NA   | 0 | 0 | 0 Not-determined | Genome-fragment | NA    | 0     |
| S12_k141_96368                             | 1044 | No  | NA   | 0 | 0 | 1 Not-determined | Genome-fragment | NA    | 0     |
| S12_k141_347898                            | 1116 | No  | NA   | 0 | 0 | 0 Not-determined | Genome-fragment | NA    | 0     |
| S12_k141_331180                            | 1106 | No  | NA   | 0 | 0 | 0 Not-determined | Genome-fragment | NA    | 0     |
| S8_k141_51097                              | 3495 | No  | NA   | 0 | 0 | 0 Low-quality    | Genome-fragment | 6.16  | 0     |
| S12_k141_163923                            | 1021 | No  | NA   | 0 | 0 | 0 Not-determined | Genome-fragment | NA    | 0     |
| S12_k141_315424                            | 1377 | No  | NA   | 0 | 0 | 1 Not-determined | Genome-fragment | NA    | 0     |
| S1-final-viral-combined_k141_207439  full  | 3497 | No  | NA   | 3 | 0 | 0 Low-quality    | Genome-fragment | 7.94  | 0     |
| S12_k141_146621                            | 1461 | No  | NA   | 0 | 0 | 0 Not-determined | Genome-fragment | NA    | 0     |
| S12_k141_129447                            | 6314 | No  | NA   | 0 | 0 | 2 Not-determined | Genome-fragment | NA    | 0     |
| S12_k141_146633                            | 1200 | No  | NA   | 0 | 0 | 0 Not-determined | Genome-fragment | NA    | 0     |
| S17-k141_175274                            | 3497 | No  | NA   | 0 | 0 | 0 Low-quality    | Genome-fragment | 9.92  | 0     |
| S12_k141_231283                            | 1119 | No  | NA   | 0 | 0 | 0 Not-determined | Genome-fragment | NA    | 0     |
| S12_k141_381549                            | 2375 | No  | NA   | 0 | 0 | 1 Not-determined | Genome-fragment | NA    | 0     |
| S12_k141_47392                             | 1739 | No  | NA   | 0 | 0 | 1 Not-determined | Genome-fragment | NA    | 0     |
| S12_k141_29483                             | 1729 | No  | NA   | 0 | 0 |                  |                 |       |       |



|                                               |       |     |    |      |    |                |                 |                 |      |       |
|-----------------------------------------------|-------|-----|----|------|----|----------------|-----------------|-----------------|------|-------|
| S11_k141_235888                               | 3500  | No  | NA | 2    | 0  | Low-quality    | Genome-fragment | 7.67            | 0    |       |
| S12_k141_247346                               | 1261  | No  | NA | 0    | 0  | Not-determined | Genome-fragment | NA              | 0    |       |
| S2-final-viral-combined_k141_207961[full]     | 3500  | No  | NA | 0    | 0  | Low-quality    | Genome-fragment | 9.36            | 0    |       |
| S12_k141_214235                               | 1440  | No  | NA | 0    | 1  | Not-determined | Genome-fragment | NA              | 0    |       |
| S12_k141_129641                               | 6040  | No  | NA | 0    | 2  | Not-determined | Genome-fragment | NA              | 0    |       |
| S12_k141_298005                               | 6123  | No  | NA | 0    | 0  | Not-determined | Genome-fragment | NA              | 0    |       |
| S8_k141_110259                                | 3500  | No  | NA | 0    | 4  | Low-quality    | Genome-fragment | 1.29            | 0    |       |
| S12_k141_164248                               | 5255  | No  | NA | 0    | 2  | Not-determined | Genome-fragment | NA              | 0    |       |
| S12_k141_307679                               | 3501  | No  | NA | 0    | 0  | Low-quality    | Genome-fragment | 5.78            | 0    |       |
| S12_k141_214249                               | 1117  | No  | NA | 0    | 0  | Not-determined | Genome-fragment | NA              | 0    |       |
| S12_k141_47708                                | 1439  | No  | NA | 0    | 1  | Not-determined | Genome-fragment | NA              | 0    |       |
| S12_k141_3426207                              | 1062  | No  | NA | 0    | 0  | Not-determined | Genome-fragment | NA              | 0    |       |
| S12_k141_96681                                | 4984  | No  | NA | 0    | 3  | Not-determined | Genome-fragment | NA              | 0    |       |
| S12_k141_282065                               | 3049  | No  | NA | 0    | 2  | Not-determined | Genome-fragment | NA              | 0    |       |
| S12_k141_381831                               | 1502  | No  | NA | 0    | 0  | Not-determined | Genome-fragment | NA              | 0    |       |
| S12_k141_282090                               | 1610  | No  | NA | 0    | 2  | Not-determined | Genome-fragment | NA              | 0    |       |
| S12_k141_348258                               | 1555  | No  | NA | 0    | 1  | Not-determined | Genome-fragment | NA              | 0    |       |
| S4-final-viral-combined_k141_50393[full]      | 3501  | No  | NA | 0    | 2  | Low-quality    | Genome-fragment | 7.43            | 0    |       |
| S12_k141_129784                               | 1719  | No  | NA | 0    | 0  | Not-determined | Genome-fragment | NA              | 0    |       |
| S12_k141_282117                               | 1675  | No  | NA | 0    | 1  | Not-determined | Genome-fragment | NA              | 0    |       |
| S1-final-viral-combined_k141_326470[full]     | 3502  | No  | NA | 0    | 4  | Low-quality    | Genome-fragment | 4.5             | 0    |       |
| S12_k141_247513                               | 1464  | No  | NA | 0    | 0  | Not-determined | Genome-fragment | NA              | 0    |       |
| S12_k141_197850                               | 1417  | No  | NA | 0    | 1  | Not-determined | Genome-fragment | NA              | 0    |       |
| S12_k141_29810                                | 1167  | No  | NA | 0    | 2  | Not-determined | Genome-fragment | NA              | 0    |       |
| S12_k141_398175                               | 1003  | No  | NA | 0    | 1  | Not-determined | Genome-fragment | NA              | 0    |       |
| S12_k141_298104                               | 1588  | No  | NA | 0    | 0  | Not-determined | Genome-fragment | NA              | 0    |       |
| S12_k141_113089                               | 4474  | No  | NA | 0    | 2  | Not-determined | Genome-fragment | NA              | 0    |       |
| S3-final-viral-combined_k141_57670[full]      | 3502  | No  | NA | 0    | 1  | Low-quality    | Genome-fragment | 4.44            | 0    |       |
| S12_k141_113098                               | 1082  | No  | NA | 0    | 1  | Not-determined | Genome-fragment | NA              | 0    |       |
| S12_k141_96764                                | 3011  | No  | NA | 0    | 1  | Not-determined | Genome-fragment | NA              | 0    |       |
| S12_k141_29849                                | 1073  | No  | NA | 0    | 1  | Not-determined | Genome-fragment | NA              | 0    |       |
| S12_k141_398210                               | 1041  | No  | NA | 0    | 2  | Not-determined | Genome-fragment | NA              | 0    |       |
| S12_k141_247571                               | 3039  | No  | NA | 0    | 2  | Not-determined | Genome-fragment | NA              | 0    |       |
| S12_k141_231696                               | 2656  | No  | NA | 0    | 1  | Not-determined | Genome-fragment | NA              | 0    |       |
| S12_k141_282204                               | 1517  | No  | NA | 0    | 1  | Not-determined | Genome-fragment | NA              | 0    |       |
| S12-final-viral-combined_k141_363884[full]    | 3502  | No  | NA | 1    | 0  | Low-quality    | Genome-fragment | 4.72            | 0    |       |
| S12_k141_247637                               | 1197  | No  | NA | 0    | 1  | Not-determined | Genome-fragment | NA              | 0    |       |
| S12_k141_113159                               | 1382  | No  | NA | 0    | 1  | Not-determined | Genome-fragment | NA              | 0    |       |
| S12_k141_197952                               | 3385  | No  | NA | 0    | 0  | Not-determined | Genome-fragment | NA              | 0    |       |
| S12_k141_146945                               | 1083  | No  | NA | 0    | 0  | Not-determined | Genome-fragment | NA              | 0    |       |
| S11-final-viral-combined_k141_329871[full]    | 3503  | No  | NA | 3    | 0  | Low-quality    | Genome-fragment | 7.89            | 0    |       |
| S12_k141_180926                               | 1341  | No  | NA | 0    | 0  | Not-determined | Genome-fragment | NA              | 0    |       |
| S12_k141_146958                               | 1042  | No  | NA | 0    | 0  | Not-determined | Genome-fragment | NA              | 0    |       |
| S12_k141_63350                                | 1203  | No  | NA | 0    | 0  | Not-determined | Genome-fragment | NA              | 0    |       |
| S12_k141_282284                               | 1135  | No  | NA | 0    | 0  | Not-determined | Genome-fragment | NA              | 0    |       |
| S12_k141_180953                               | 3509  | No  | NA | 0    | 1  | Not-determined | Genome-fragment | NA              | 0    |       |
| S12_k141_315900                               | 1150  | No  | NA | 0    | 0  | Not-determined | Genome-fragment | NA              | 0    |       |
| S12_k141_2909                                 | 3503  | No  | NA | 0    | 0  | Low-quality    | Genome-fragment | 7.8             | 0    |       |
| S17-final-viral-combined_k141_83105[full]     | 3504  | No  | NA | 1    | 0  | Low-quality    | Genome-fragment | 4.64            | 0    |       |
| S12_k141_348467                               | 3238  | No  | NA | 0    | 3  | Not-determined | Genome-fragment | NA              | 0    |       |
| S12_k141_264141                               | 1151  | No  | NA | 0    | 0  | Not-determined | Genome-fragment | NA              | 0    |       |
| S11-final-viral-combined_k141_81950[full]     | 3505  | No  | NA | 1    | 0  | Low-quality    | Genome-fragment | 4.96            | 0    |       |
| S12_k141_13018                                | 1141  | No  | NA | 0    | 1  | Not-determined | Genome-fragment | NA              | 0    |       |
| S12_k141_164586                               | 2575  | No  | NA | 0    | 1  | Not-determined | Genome-fragment | NA              | 0    |       |
| S17-final-viral-combined_k141_57980[full]     | 3505  | No  | NA | 0    | 0  | Low-quality    | Genome-fragment | 7.42            | 0    |       |
| S12_k141_381987                               | 1095  | No  | NA | 0    | 0  | Not-determined | Genome-fragment | NA              | 0    |       |
| S17-k141_6953                                 | 3505  | No  | NA | 0    | 0  | Low-quality    | Genome-fragment | 8.39            | 0    |       |
| S12_k141_129857                               | 2317  | No  | NA | 0    | 2  | Not-determined | Genome-fragment | NA              | 0    |       |
| S12_k141_147034                               | 2101  | No  | NA | 0    | 1  | Not-determined | Genome-fragment | NA              | 0    |       |
| S8_k141_149573                                | 3505  | No  | NA | 1    | 0  | Low-quality    | Genome-fragment | 4.42            | 0    |       |
| S12_k141_298254                               | 1434  | No  | NA | 0    | 1  | Not-determined | Genome-fragment | NA              | 0    |       |
| S7-final-viral-combined_k141_103195[full]     | 3506  | No  | NA | 0    | 3  | Low-quality    | Genome-fragment | 2.88            | 0    |       |
| S12-final-viral-combined_k141_220740[full]    | 3506  | No  | NA | 0    | 4  | Low-quality    | Genome-fragment | 1.79            | 0    |       |
| S12_k141_214675                               | 1445  | No  | NA | 0    | 1  | Not-determined | Genome-fragment | NA              | 0    |       |
| S8-final-viral-combined_k141_237255[full]     | 3506  | No  | NA | 0    | 0  | Low-quality    | Genome-fragment | 5.08            | 0    |       |
| S12_k141_398287                               | 6485  | No  | NA | 0    | 3  | Not-determined | Genome-fragment | NA              | 0    |       |
| S12_k141_214697                               | 4816  | No  | NA | 0    | 6  | Not-determined | Genome-fragment | NA              | 0    |       |
| S1_k141_4547                                  | 3507  | No  | NA | 1    | 0  | Low-quality    | Genome-fragment | 2.9             | 0    |       |
| S7_k141_93412                                 | 3507  | No  | NA | 0    | 0  | Low-quality    | Genome-fragment | 4.28            | 0    |       |
| S12_k141_13135                                | 1051  | No  | NA | 0    | 0  | Not-determined | Genome-fragment | NA              | 0    |       |
| S12_k141_398301                               | 1329  | No  | NA | 0    | 2  | Not-determined | Genome-fragment | NA              | 0    |       |
| S12_k141_91082                                | 3856  | No  | NA | 0    | 1  | Not-determined | Genome-fragment | NA              | 0    |       |
| S12_k141_398326                               | 1243  | No  | NA | 0    | 0  | Not-determined | Genome-fragment | NA              | 0    |       |
| S3-final-viral-combined_k141_9263[full]       | 3508  | Yes | NA | 1326 | 1  | 1              | Low-quality     | Genome-fragment | 2.36 | 62.2  |
| S12_k141_311927                               | 1280  | No  | NA | 0    | 2  | Not-determined | Genome-fragment | NA              | 0    |       |
| S12_k141_298334                               | 1415  | No  | NA | 0    | 0  | Not-determined | Genome-fragment | NA              | 0    |       |
| S12_k141_48020                                | 7977  | No  | NA | 0    | 15 | Not-determined | Genome-fragment | NA              | 0    |       |
| S12_k141_81144                                | 3082  | No  | NA | 0    | 2  | Not-determined | Genome-fragment | NA              | 0    |       |
| S12_k141_157266                               | 3508  | No  | NA | 0    | 0  | Low-quality    | Genome-fragment | 3.64            | 0    |       |
| S1-final-viral-combined_k141_271545[full]     | 3509  | No  | NA | 0    | 3  | Low-quality    | Genome-fragment | 2.44            | 0    |       |
| S1_k141_200308                                | 3509  | No  | NA | 4    | 0  | Low-quality    | Genome-fragment | 5.7             | 0    |       |
| S12_k141_363426                               | 1680  | No  | NA | 0    | 1  | Not-determined | Genome-fragment | NA              | 0    |       |
| S12_k141_48066                                | 1817  | No  | NA | 0    | 0  | Not-determined | Genome-fragment | NA              | 0    |       |
| S11-final-viral-combined_k141_99387[full]     | 3510  | No  | NA | 0    | 3  | Low-quality    | Genome-fragment | 1.56            | 0    |       |
| S1-final-viral-combined_k141_308053[full]     | 3510  | No  | NA | 0    | 0  | Low-quality    | Genome-fragment | 5.72            | 0    |       |
| S12_k141_282577                               | 1004  | No  | NA | 0    | 0  | Not-determined | Genome-fragment | NA              | 0    |       |
| S12_k141_81208                                | 1836  | No  | NA | 0    | 0  | Not-determined | Genome-fragment | NA              | 0    |       |
| S12_k141_91238                                | 1651  | No  | NA | 0    | 0  | Not-determined | Genome-fragment | NA              | 0    |       |
| S12_k141_348655                               | 2762  | No  | NA | 0    | 0  | Not-determined | Genome-fragment | NA              | 0    |       |
| S5-final-viral-combined_k141_61617[full]      | 3510  | No  | NA | 2    | 0  | Low-quality    | Genome-fragment | 13.96           | 0    |       |
| S12_k141_198259                               | 1010  | No  | NA | 0    | 1  | Not-determined | Genome-fragment | NA              | 0    |       |
| S6_k141_25388                                 | 3510  | No  | NA | 1    | 0  | Low-quality    | Genome-fragment | 3.78            | 0    |       |
| S12_k141_13328                                | 9651  | No  | NA | 0    | 3  | Not-determined | Genome-fragment | NA              | 0    |       |
| S12_k141_198288                               | 3316  | No  | NA | 0    | 1  | Not-determined | Genome-fragment | NA              | 0    |       |
| S12_k141_113541                               | 3776  | No  | NA | 0    | 1  | Not-determined | Genome-fragment | NA              | 0    |       |
| S11-final-viral-combined_k141_8135[112]genome | 3511  | No  | NA | 1    | 0  | Low-quality    | Genome-fragment | 9.69            | 0    |       |
| S12_k141_97192                                | 1201  | No  | NA | 0    | 1  | Not-determined | Genome-fragment | NA              | 0    |       |
| S12_k141_214977                               | 1041  | No  | NA | 0    | 2  | Not-determined | Genome-fragment | NA              | 0    |       |
| S12_k141_363557                               | 1394  | No  | NA | 0    | 1  | Not-determined | Genome-fragment | NA              | 0    |       |
| S12_k141_81286                                | 1750  | No  | NA | 0    | 4  | Not-determined | Genome-fragment | NA              | 0    |       |
| S12_k141_382280                               | 3415  | No  | NA | 0    | 1  | Not-determined | Genome-fragment | NA              | 0    |       |
| S12_k141_164822                               | 1002  | No  | NA | 0    | 1  | Not-determined | Genome-fragment | NA              | 0    |       |
| S2_k141_21354                                 | 3511  | No  | NA | 0    | 1  | Low-quality    | Genome-fragment | 5.85            | 0    |       |
| S12_k141_48219                                | 3025  | No  | NA | 0    | 2  | Not-determined | Genome-fragment | NA              | 0    |       |
| S12_k141_382329                               | 1461  | No  | NA | 0    | 2  | Not-determined | Genome-fragment | NA              | 0    |       |
| S12_k141_248158                               | 1546  | No  | NA | 0    | 1  | Not-determined | Genome-fragment | NA              | 0    |       |
| S12_k141_48240                                | 1087  | No  | NA | 0    | 0  | Not-determined | Genome-fragment | NA              | 0    |       |
| S12_k141_81344                                | 1266  | No  | NA | 0    | 1  | Not-determined | Genome-fragment | NA              | 0    |       |
| S12_k141_282664                               | 1088  | No  | NA | 0    | 0  | Not-determined | Genome-fragment | NA              | 0    |       |
| S12_k141_81383                                | 1048  | No  | NA | 0    | 1  | Not-determined | Genome-fragment | NA              | 0    |       |
| S12_k141_363617                               | 2617  | No  | NA | 0    | 1  | Not-determined | Genome-fragment | NA              | 0    |       |
| S8-final-viral-combined_k141_161032[full]     | 3511  | No  | NA | 0    | 1  | Low-quality    | Genome-fragment | 6.27            | 0    |       |
| S9-final-viral-combined_k141_59476[full]      | 3512  | No  | NA | 0    | 2  | Low-quality    | Genome-fragment | 7.48            | 0    |       |
| S12_k141_363634                               | 1283  | No  | NA | 0    | 0  | Not-determined | Genome-fragment | NA              | 0    |       |
| S12_k141_398578                               | 1004  | No  | NA | 0    | 0  | Not-determined | Genome-fragment | NA              | 0    |       |
| S12_k141_48303                                | 1366  | No  | NA | 0    | 2  | Not-determined | Genome-fragment | NA              | 0    |       |
| S12_k141_147362                               | 1588  | No  | NA | 0    | 2  | Not-determined | Genome-fragment | NA              | 0    |       |
| S12_k141_198475                               | 1302  | No  | NA | 0    | 2  | Not-determined | Genome-fragment | NA              | 0    |       |
| S12_k141_48320                                | 1360  | No  | NA | 0    | 1  | Not-determined | Genome-fragment | NA              | 0    |       |
| S12_k141_48324                                | 1167  | No  | NA | 0    | 3  | Not-determined | Genome-fragment | NA              | 0    |       |
| S4-final-viral-combined_k141_104799[full]     | 3512  | No  | NA | 0    | 3  | Low-quality    | Genome-fragment | 4.26            | 0    |       |
| S12_k141_13562                                | 3529  | No  | NA | 0    | 2  | Not-determined | Genome-fragment | NA              | 0    |       |
| S12_k141_164925                               | 3133  | No  | NA | 0    | 2  | Not-determined | Genome-fragment | NA              | 0    |       |
| S12_k141_84007                                | 3513  | No  | NA | 0    | 1  | Low-quality    | Genome-fragment | 8.51            | 0    |       |
| S12_k141_298272                               | 1180  | No  | NA | 0    | 1  | Not-determined | Genome-fragment | NA              | 0    |       |
| S12_k141_382401                               | 6044  | No  | NA | 0    | 2  | Not-determined | Genome-fragment | NA              | 0    |       |
| S2_k141_248328                                | 3513  | No  | NA | 0    | 0  | Low-quality    | Genome-fragment | 3.03            | 0    |       |
| S12_k141_198506                               | 1653  | No  | NA | 0    | 1  | Not-determined | Genome-fragment | NA              | 0    |       |
| S12_k141_147385                               | 1284  | No  | NA | 0    | 0  | Not-determined | Genome-fragment | NA              | 0    |       |
| S12_k141_282743                               | 1090  | No  | NA | 0    | 2  | Not-determined | Genome-fragment | NA              | 0    |       |
| S12_k141_97326                                | 4572  | No  | NA | 0    | 3  | Not-determined | Genome-fragment | NA              | 0    |       |
| S12_k141_215108                               | 3887  | No  | NA | 0    | 2  | Not-determined | Genome-fragment | NA              | 0    |       |
| S12_k141_232333                               | 1939  | No  | NA | 0    | 1  | Not-determined | Genome-fragment | NA              | 0    |       |
| S12_k141_298774                               | 1522  | No  | NA | 0    | 0  | Not-determined | Genome-fragment | NA              | 0    |       |
| S12_k141_316493                               | 2561  | No  | NA | 0    | 2  | Not-determined | Genome-fragment | NA              | 0    |       |
| S12_k141_282775                               | 5476  | No  | NA | 0    | 2  | Not-determined | Genome-fragment | NA              | 0    |       |
| S12_k141_248295                               | 1010  | No  | NA | 0    | 1  | Not-determined | Genome-fragment | NA              | 0    |       |
| S12_k141_48406                                | 1192  | No  | NA | 0    | 0  | Not-determined | Genome-fragment | NA              | 0    |       |
| S12_k141_382449                               | 12399 | No  | NA | 0    | 8  | Not-determined | Genome-fragment | NA              | 0    |       |
| S12_k141_215139                               | 3990  | No  | NA | 0    | 4  | Not-determined | Genome-fragment | NA              | 0    |       |
| S12_k141_97371                                | 1660  | No  | NA | 0    | 1  | Not-determined | Genome-fragment | NA              | 0    |       |
| S12_k141_63975                                | 3951  | No  | NA | 0    | 6  | Not-determined | Genome-fragment | NA              | 0    |       |
| S17-final-viral-combined_k141_100922[full]    | 3514  | Yes | NA | 996  | 1  | 2              | Low-quality     | Genome-fragment | 0.63 | 71.66 |
| S12_k141_398687                               | 7060  | No  | NA | 0    | 5  | Not-determined | Genome-fragment | NA              | 0    |       |
| S12_k141_215211                               | 3483  | No  | NA | 0    | 3  |                |                 |                 |      |       |



|                                      |      |     |    |   |   |                |                 |       |       |
|--------------------------------------|------|-----|----|---|---|----------------|-----------------|-------|-------|
| S12_k141_264675                      | 1070 | No  | NA | 0 | 1 | Not-determined | Genome-fragment | NA    | 0     |
| S12_k141_91600                       | 4240 | No  | NA | 0 | 0 | Not-determined | Genome-fragment | NA    | 0     |
| S12-final-viral-combined_k141_293752 | 3519 | No  | NA | 1 | 0 | Low-quality    | Genome-fragment | 8.7   | 0     |
| S12_k141_64106                       | 1144 | No  | NA | 0 | 0 | Not-determined | Genome-fragment | NA    | 0     |
| S12-final-viral-combined_k141_246114 | 3519 | No  | NA | 3 | 0 | Low-quality    | Genome-fragment | 7.71  | 0     |
| S8-final-viral-combined_k141_121091  | 3520 | No  | NA | 0 | 0 | Low-quality    | Genome-fragment | 5.47  | 0     |
| S12_k141_130688                      | 1910 | No  | NA | 0 | 2 | Not-determined | Genome-fragment | NA    | 0     |
| S12_k141_198847                      | 1167 | No  | NA | 0 | 0 | Not-determined | Genome-fragment | NA    | 0     |
| S12_k141_91759                       | 2148 | No  | NA | 0 | 0 | Not-determined | Genome-fragment | NA    | 0     |
| S12_k141_232745                      | 1122 | No  | NA | 0 | 1 | Not-determined | Genome-fragment | NA    | 0     |
| S9_k141_12809                        | 3520 | No  | NA | 2 | 1 | Low-quality    | Genome-fragment | 8.73  | 0     |
| S12_k141_398884                      | 1048 | No  | NA | 0 | 0 | Not-determined | Genome-fragment | NA    | 0     |
| S12_k141_48587                       | 2146 | No  | NA | 0 | 1 | Not-determined | Genome-fragment | NA    | 0     |
| S5-final-viral-combined_k141_140230  | 3520 | No  | NA | 3 | 0 | Low-quality    | Genome-fragment | 9.83  | 0     |
| S12_k141_131973                      | 3177 | No  | NA | 0 | 1 | Not-determined | Genome-fragment | NA    | 0     |
| S12_k141_231762                      | 2970 | No  | NA | 0 | 2 | Not-determined | Genome-fragment | NA    | 0     |
| S12_k141_299171                      | 7814 | No  | NA | 0 | 2 | Not-determined | Genome-fragment | NA    | 0     |
| S12_k141_30722                       | 1732 | No  | NA | 0 | 0 | Not-determined | Genome-fragment | NA    | 0     |
| S12_k141_262215                      | 1462 | No  | NA | 0 | 0 | Not-determined | Genome-fragment | NA    | 0     |
| S12_k141_81801                       | 1279 | No  | NA | 0 | 1 | Not-determined | Genome-fragment | NA    | 0     |
| S12_k141_81831                       | 2148 | No  | NA | 0 | 1 | Not-determined | Genome-fragment | NA    | 0     |
| S12_k141_349304                      | 1029 | No  | NA | 0 | 1 | Not-determined | Genome-fragment | NA    | 0     |
| S4-final-viral-combined_k141_96200   | 3520 | No  | NA | 0 | 1 | Low-quality    | Genome-fragment | 8.18  | 0     |
| S6-final-viral-combined_k141_72578   | 3520 | No  | NA | 0 | 2 | Low-quality    | Genome-fragment | 1.67  | 0     |
| S6-final-viral-combined_k141_98512   | 3521 | No  | NA | 1 | 0 | Low-quality    | Genome-fragment | 2.19  | 0     |
| S12_k141_48718                       | 1079 | No  | NA | 0 | 0 | Not-determined | Genome-fragment | NA    | 0     |
| S12_k141_81899                       | 1440 | No  | NA | 0 | 2 | Not-determined | Genome-fragment | NA    | 0     |
| S5-final-viral-combined_k141_141753  | 3522 | No  | NA | 9 | 0 | Low-quality    | Genome-fragment | 5.75  | 0     |
| S5_k141_164362                       | 3523 | Yes | NA | 1 | 2 | Low-quality    | Genome-fragment | 1.95  | 74.28 |
| S12_k141_64180                       | 1159 | No  | NA | 0 | 1 | Not-determined | Genome-fragment | NA    | 0     |
| S12_k141_64182                       | 5389 | No  | NA | 0 | 2 | Not-determined | Genome-fragment | NA    | 0     |
| S12_k141_198982                      | 9769 | No  | NA | 0 | 1 | Not-determined | Genome-fragment | NA    | 0     |
| S12_k141_81927                       | 3035 | No  | NA | 0 | 2 | Not-determined | Genome-fragment | NA    | 0     |
| S12_k141_48756                       | 4056 | No  | NA | 0 | 0 | Not-determined | Genome-fragment | NA    | 0     |
| S12_k141_163304                      | 1111 | No  | NA | 0 | 0 | Not-determined | Genome-fragment | NA    | 0     |
| S8-final-viral-combined_k141_46679   | 3523 | No  | NA | 1 | 0 | Low-quality    | Genome-fragment | 8.01  | 0     |
| S12_k141_332895                      | 1052 | No  | NA | 0 | 1 | Not-determined | Genome-fragment | NA    | 0     |
| S12_k141_364230                      | 3360 | No  | NA | 0 | 1 | Not-determined | Genome-fragment | NA    | 0     |
| S12_k141_163341                      | 1121 | No  | NA | 0 | 1 | Not-determined | Genome-fragment | NA    | 0     |
| S12_k141_48794                       | 1455 | No  | NA | 0 | 2 | Not-determined | Genome-fragment | NA    | 0     |
| S12_k141_30823                       | 1465 | No  | NA | 0 | 1 | Not-determined | Genome-fragment | NA    | 0     |
| S12_k141_249434                      | 1958 | No  | NA | 0 | 0 | Not-determined | Genome-fragment | NA    | 0     |
| S11-final-viral-combined_k141_245452 | 3524 | No  | NA | 0 | 1 | Low-quality    | Genome-fragment | 2.44  | 0     |
| S12_k141_199050                      | 4039 | No  | NA | 0 | 1 | Not-determined | Genome-fragment | NA    | 0     |
| S12_k141_349469                      | 1034 | No  | NA | 0 | 1 | Not-determined | Genome-fragment | NA    | 0     |
| S12_k141_48837                       | 2187 | No  | NA | 0 | 1 | Not-determined | Genome-fragment | NA    | 0     |
| S17-final-viral-combined_k141_2919   | 3524 | No  | NA | 3 | 0 | Low-quality    | Genome-fragment | 7.48  | 0     |
| S12_k141_14191                       | 1298 | No  | NA | 0 | 0 | Not-determined | Genome-fragment | NA    | 0     |
| S12_k141_232938                      | 1356 | No  | NA | 0 | 2 | Not-determined | Genome-fragment | NA    | 0     |
| S12_k141_264992                      | 1398 | No  | NA | 0 | 0 | Not-determined | Genome-fragment | NA    | 0     |
| S12_k141_165402                      | 3245 | No  | NA | 0 | 2 | Not-determined | Genome-fragment | NA    | 0     |
| S12_k141_14256                       | 1442 | No  | NA | 0 | 0 | Not-determined | Genome-fragment | NA    | 0     |
| S12_k141_283541                      | 1459 | No  | NA | 0 | 0 | Not-determined | Genome-fragment | NA    | 0     |
| S12_k141_382818                      | 2514 | No  | NA | 0 | 2 | Not-determined | Genome-fragment | NA    | 0     |
| S12_k141_199142                      | 1167 | No  | NA | 0 | 1 | Not-determined | Genome-fragment | NA    | 0     |
| S12_k141_48909                       | 1057 | No  | NA | 0 | 0 | Not-determined | Genome-fragment | NA    | 0     |
| S12_k141_233022                      | 1168 | No  | NA | 0 | 1 | Not-determined | Genome-fragment | NA    | 0     |
| S12_k141_248763                      | 1515 | No  | NA | 0 | 1 | Not-determined | Genome-fragment | NA    | 0     |
| S12_k141_48918                       | 1543 | No  | NA | 0 | 0 | Not-determined | Genome-fragment | NA    | 0     |
| S12_k141_82169                       | 3496 | No  | NA | 0 | 1 | Not-determined | Genome-fragment | NA    | 0     |
| S12_k141_333064                      | 1770 | No  | NA | 0 | 2 | Not-determined | Genome-fragment | NA    | 0     |
| S12_k141_165505                      | 1278 | No  | NA | 0 | 1 | Not-determined | Genome-fragment | NA    | 0     |
| S12_k141_233037                      | 1019 | No  | NA | 0 | 1 | Not-determined | Genome-fragment | NA    | 0     |
| S12_k141_114392                      | 4911 | No  | NA | 0 | 0 | Not-determined | Genome-fragment | NA    | 0     |
| S12_k141_399148                      | 1048 | No  | NA | 0 | 0 | Not-determined | Genome-fragment | NA    | 0     |
| S12_k141_333083                      | 1251 | No  | NA | 0 | 0 | Not-determined | Genome-fragment | NA    | 0     |
| S12_k141_333087                      | 3976 | No  | NA | 0 | 3 | Not-determined | Genome-fragment | NA    | 0     |
| S12_k141_165531                      | 2916 | No  | NA | 0 | 1 | Not-determined | Genome-fragment | NA    | 0     |
| S12_k141_31007                       | 5171 | No  | NA | 0 | 0 | Not-determined | Genome-fragment | NA    | 0     |
| S12_k141_333096                      | 3705 | No  | NA | 0 | 0 | Not-determined | Genome-fragment | NA    | 0     |
| S5_k141_90342                        | 3525 | No  | NA | 0 | 1 | Low-quality    | Genome-fragment | 5.92  | 0     |
| S12_k141_215793                      | 1042 | No  | NA | 0 | 1 | Not-determined | Genome-fragment | NA    | 0     |
| S12_k141_31026                       | 1087 | No  | NA | 0 | 1 | Not-determined | Genome-fragment | NA    | 0     |
| S12_k141_131142                      | 2672 | No  | NA | 0 | 2 | Not-determined | Genome-fragment | NA    | 0     |
| S12_k141_162396                      | 3035 | No  | NA | 0 | 1 | Not-determined | Genome-fragment | NA    | 0     |
| S8-final-viral-combined_k141_56042   | 3525 | No  | NA | 0 | 1 | Low-quality    | Genome-fragment | 2.4   | 0     |
| S12_k141_98086                       | 5522 | No  | NA | 0 | 3 | Not-determined | Genome-fragment | NA    | 0     |
| S1-final-viral-combined_k141_56934   | 3526 | No  | NA | 0 | 0 | Low-quality    | Genome-fragment | 2.1   | 0     |
| S12_k141_98092                       | 1094 | No  | NA | 0 | 1 | Not-determined | Genome-fragment | NA    | 0     |
| S12_k141_14463                       | 1183 | No  | NA | 0 | 0 | Not-determined | Genome-fragment | NA    | 0     |
| S12_k141_248852                      | 2300 | No  | NA | 0 | 2 | Not-determined | Genome-fragment | NA    | 0     |
| S12_k141_114566                      | 1201 | No  | NA | 0 | 0 | Not-determined | Genome-fragment | NA    | 0     |
| S12_k141_82295                       | 7754 | No  | NA | 0 | 3 | Not-determined | Genome-fragment | NA    | 0     |
| S12_k141_114610                      | 1043 | No  | NA | 0 | 2 | Not-determined | Genome-fragment | NA    | 0     |
| S12_k141_25475                       | 3526 | No  | NA | 2 | 0 | Low-quality    | Genome-fragment | 2.63  | 0     |
| S12_k141_283697                      | 1029 | No  | NA | 0 | 1 | Not-determined | Genome-fragment | NA    | 0     |
| S12_k141_248911                      | 1077 | No  | NA | 0 | 0 | Not-determined | Genome-fragment | NA    | 0     |
| S12_k141_31195                       | 1010 | No  | NA | 0 | 1 | Not-determined | Genome-fragment | NA    | 0     |
| S2-final-viral-combined_k141_200155  | 3526 | No  | NA | 0 | 1 | Low-quality    | Genome-fragment | 2.22  | 0     |
| S12_k141_364639                      | 1932 | No  | NA | 0 | 1 | Not-determined | Genome-fragment | NA    | 0     |
| S12_k141_216043                      | 1284 | No  | NA | 0 | 1 | Not-determined | Genome-fragment | NA    | 0     |
| S12_k141_364650                      | 1044 | No  | NA | 0 | 1 | Not-determined | Genome-fragment | NA    | 0     |
| S12_k141_349787                      | 1297 | No  | NA | 0 | 0 | Not-determined | Genome-fragment | NA    | 0     |
| S12_k141_49070                       | 3131 | No  | NA | 0 | 3 | Not-determined | Genome-fragment | NA    | 0     |
| S12_k141_248990                      | 1032 | No  | NA | 0 | 0 | Not-determined | Genome-fragment | NA    | 0     |
| S12_k141_349795                      | 3803 | No  | NA | 0 | 2 | Not-determined | Genome-fragment | NA    | 0     |
| S12_k141_216070                      | 1085 | No  | NA | 0 | 0 | Not-determined | Genome-fragment | NA    | 0     |
| S12_k141_148279                      | 1937 | No  | NA | 0 | 1 | Not-determined | Genome-fragment | NA    | 0     |
| S12_k141_263183                      | 1639 | No  | NA | 0 | 1 | Not-determined | Genome-fragment | NA    | 0     |
| S12_k141_317469                      | 1071 | No  | NA | 0 | 1 | Not-determined | Genome-fragment | NA    | 0     |
| S12_k141_317479                      | 1125 | No  | NA | 0 | 0 | Not-determined | Genome-fragment | NA    | 0     |
| S12_k141_199359                      | 1467 | No  | NA | 0 | 1 | Not-determined | Genome-fragment | NA    | 0     |
| S12_k141_364756                      | 1222 | No  | NA | 0 | 0 | Not-determined | Genome-fragment | NA    | 0     |
| S12_k141_216133                      | 1679 | No  | NA | 0 | 1 | Not-determined | Genome-fragment | NA    | 0     |
| S12_k141_164583                      | 1451 | No  | NA | 0 | 1 | Not-determined | Genome-fragment | NA    | 0     |
| S2-final-viral-combined_k141_143245  | 3526 | No  | NA | 0 | 3 | Low-quality    | Genome-fragment | 1.09  | 0     |
| S12_k141_364776                      | 2179 | No  | NA | 0 | 2 | Not-determined | Genome-fragment | NA    | 0     |
| S12_k141_216151                      | 1289 | No  | NA | 0 | 1 | Not-determined | Genome-fragment | NA    | 0     |
| S12_k141_49142                       | 6861 | No  | NA | 0 | 0 | Not-determined | Genome-fragment | NA    | 0     |
| S12_k141_14638                       | 1846 | No  | NA | 0 | 0 | Not-determined | Genome-fragment | NA    | 0     |
| S12_k141_283831                      | 1499 | No  | NA | 0 | 2 | Not-determined | Genome-fragment | NA    | 0     |
| S9_k141_91393                        | 3527 | No  | NA | 0 | 0 | Low-quality    | Genome-fragment | 10.85 | 0     |
| S17-final-viral-combined_k141_226500 | 3527 | No  | NA | 1 | 0 | Low-quality    | Genome-fragment | 3.43  | 0     |
| S12_k141_299685                      | 1085 | No  | NA | 0 | 2 | Not-determined | Genome-fragment | NA    | 0     |
| S12_k141_364842                      | 1573 | No  | NA | 0 | 0 | Not-determined | Genome-fragment | NA    | 0     |
| S17-final-viral-combined_k141_222001 | 3527 | No  | NA | 0 | 2 | Low-quality    | Genome-fragment | 3.66  | 0     |
| S12_k141_64920                       | 1353 | No  | NA | 0 | 1 | Not-determined | Genome-fragment | NA    | 0     |
| S11-final-viral-combined_k141_278168 | 3528 | No  | NA | 3 | 0 | Low-quality    | Genome-fragment | 9.56  | 0     |
| S12_k141_216222                      | 2129 | No  | NA | 0 | 2 | Not-determined | Genome-fragment | NA    | 0     |
| S1-final-viral-combined_k141_314356  | 3528 | No  | NA | 1 | 0 | Low-quality    | Genome-fragment | 5.81  | 0     |
| S12_k141_399480                      | 1079 | No  | NA | 0 | 1 | Not-determined | Genome-fragment | NA    | 0     |
| S5-final-viral-combined_k141_6608    | 3528 | No  | NA | 0 | 0 | Low-quality    | Genome-fragment | 5.21  | 0     |
| S12_k141_82540                       | 1056 | No  | NA | 0 | 0 | Not-determined | Genome-fragment | NA    | 0     |
| S7-final-viral-combined_k141_72695   | 3528 | No  | NA | 0 | 0 | Low-quality    | Genome-fragment | 8.54  | 0     |
| S12_k141_148436                      | 4762 | No  | NA | 0 | 1 | Not-determined | Genome-fragment | NA    | 0     |
| S12_k141_49253                       | 1401 | No  | NA | 0 | 1 | Not-determined | Genome-fragment | NA    | 0     |
| S12_k141_265340                      | 1043 | No  | NA | 0 | 2 | Not-determined | Genome-fragment | NA    | 0     |
| S12_k141_148440                      | 3354 | No  | NA | 0 | 0 | Not-determined | Genome-fragment | NA    | 0     |
| S12_k141_31463                       | 2194 | No  | NA | 0 | 0 | Not-determined | Genome-fragment | NA    | 0     |
| S12_k141_265350                      | 2294 | No  | NA | 0 | 1 | Not-determined | Genome-fragment | NA    | 0     |
| S12_k141_31478                       | 1367 | No  | NA | 0 | 0 | Not-determined | Genome-fragment | NA    | 0     |
| S12_k141_249218                      | 1372 | No  | NA | 0 | 1 | Not-determined | Genome-fragment | NA    | 0     |
| S12_k141_98428                       | 1012 | No  | NA | 0 | 1 | Not-determined | Genome-fragment | NA    | 0     |
| S7_k141_87798                        | 3528 | No  | NA | 0 | 2 | Low-quality    | Genome-fragment | 8.9   | 0     |
| S12_k141_216319                      | 1134 | No  | NA | 0 | 0 | Not-determined | Genome-fragment | NA    | 0     |
| S12_k141_98468                       | 1495 | No  | NA | 0 | 1 | Not-determined | Genome-fragment | NA    | 0     |
| S12_k141_199535                      | 1034 | No  | NA | 0 | 0 | Not-determined | Genome-fragment | NA    | 0     |
| S12_k141_14783                       | 1863 | No  | NA | 0 | 1 | Not-determined | Genome-fragment | NA    | 0     |
| S12_k141_165944                      | 6743 | No  | NA | 0 | 6 | Not-determined | Genome-fragment | NA    | 0     |
| S12_k141_383147                      | 4781 | No  | NA | 0 | 2 | Not-determined | Genome-fragment | NA    | 0     |
| S12_k141_165947                      | 1682 | No  | NA | 0 | 0 | Not-determined | Genome-fragment | NA    | 0     |
| S12_k141_206100                      | 3528 | No  | NA | 0 | 0 | Low-quality    | Genome-fragment | 4.83  | 0     |
| S12_k141_98490                       | 1355 | No  | NA | 0 | 0 | Not-determined | Genome-fragment | NA    | 0     |
| S2-final-viral-combined_k141_10659   | 3528 | No  | NA | 0 | 2 | Low-quality    | Genome-fragment | 3.91  | 0     |
| S12_k141_265373                      | 1058 | No  | NA | 0 | 0 | Not-determined | Genome-fragment | NA    | 0     |
| S12_k141_333490                      | 1665 | No  | NA | 0 | 1 | Not-determined |                 |       |       |



|                                                |       |     |      |     |   |                |                 |                 |       |       |
|------------------------------------------------|-------|-----|------|-----|---|----------------|-----------------|-----------------|-------|-------|
| S12_k141_98675                                 | 1094  | No  | NA   | 0   | 1 | Not-determined | Genome-fragment | NA              |       | 0     |
| S17-k141_129557                                | 3530  | No  | NA   | 0   | 0 | Low-quality    | Genome-fragment | NA              | 5.41  | 0     |
| S8-final-viral-combined_k141_167570[full]      | 3530  | No  | NA   | 0   | 0 | Low-quality    | Genome-fragment | NA              | 8.62  | 0     |
| S12_k141_233853                                | 4599  | No  | NA   | 0   | 0 | 1              | Not-determined  | Genome-fragment | NA    | 0     |
| S12_k141_98685                                 | 2317  | No  | NA   | 0   | 0 | 3              | Not-determined  | Genome-fragment | NA    | 0     |
| S12_k141_216597                                | 1072  | No  | NA   | 0   | 0 | 0              | Not-determined  | Genome-fragment | NA    | 0     |
| S12_k141_199823                                | 1073  | No  | NA   | 0   | 0 | 3              | Not-determined  | Genome-fragment | NA    | 0     |
| S17-final-viral-combined_k141_214803[full]     | 3532  | No  | NA   | 2   | 0 | Low-quality    | Genome-fragment | NA              | 9.57  | 0     |
| S12_k141_216605                                | 1188  | No  | NA   | 0   | 0 | 1              | Not-determined  | Genome-fragment | NA    | 0     |
| S12_k141_166105                                | 8341  | No  | NA   | 0   | 0 | 11             | Not-determined  | Genome-fragment | NA    | 0     |
| S12_k141_216632                                | 1238  | No  | NA   | 0   | 0 | 0              | Not-determined  | Genome-fragment | NA    | 0     |
| S12_k141_98751                                 | 1403  | No  | NA   | 0   | 0 | 0              | Not-determined  | Genome-fragment | NA    | 0     |
| S12_k141_399704                                | 1024  | No  | NA   | 0   | 0 | 1              | Not-determined  | Genome-fragment | NA    | 0     |
| S12-final-viral-combined_k141_181179[full]     | 3533  | No  | NA   | 1   | 0 | Low-quality    | Genome-fragment | NA              | 9.64  | 0     |
| S12_k141_383381                                | 1555  | No  | NA   | 0   | 0 | 2              | Not-determined  | Genome-fragment | NA    | 0     |
| S12_k141_131798                                | 1172  | No  | NA   | 0   | 0 | 1              | Not-determined  | Genome-fragment | NA    | 0     |
| S12_k141_383387                                | 2287  | No  | NA   | 0   | 0 | 0              | Not-determined  | Genome-fragment | NA    | 0     |
| S12_k141_333802                                | 1438  | No  | NA   | 0   | 0 | 0              | Not-determined  | Genome-fragment | NA    | 0     |
| S12_k141_284157                                | 4566  | No  | NA   | 0   | 0 | 3              | Not-determined  | Genome-fragment | NA    | 0     |
| S17-k141_207129                                | 3534  | No  | NA   | 0   | 0 | 1              | Low-quality     | Genome-fragment | NA    | 1.6   |
| S12_k141_249509                                | 4921  | No  | NA   | 0   | 0 | 4              | Not-determined  | Genome-fragment | NA    | 0     |
| S12_k141_279989                                | 3534  | No  | NA   | 0   | 0 | 0              | Low-quality     | Genome-fragment | NA    | 2.77  |
| S8-final-viral-combined_k141_188103[O partial] | 3534  | Yes | 2038 | 1   | 0 | 1              | Low-quality     | Genome-fragment | 48.97 | 42.33 |
| S12_k141_131821                                | 1027  | No  | NA   | 0   | 0 | 0              | Not-determined  | Genome-fragment | NA    | 0     |
| S12_k141_199898                                | 1493  | No  | NA   | 0   | 0 | 1              | Not-determined  | Genome-fragment | NA    | 0     |
| S12_k141_49667                                 | 1254  | No  | NA   | 0   | 0 | 1              | Not-determined  | Genome-fragment | NA    | 0     |
| S1_k141_98448                                  | 3537  | No  | NA   | 1   | 0 | 0              | Low-quality     | Genome-fragment | NA    | 8.02  |
| S12_k141_363251                                | 1957  | No  | NA   | 0   | 0 | 1              | Not-determined  | Genome-fragment | NA    | 0     |
| S12_k141_216700                                | 1442  | No  | NA   | 0   | 0 | 1              | Not-determined  | Genome-fragment | NA    | 0     |
| S12_k141_49673                                 | 2343  | No  | NA   | 0   | 0 | 1              | Not-determined  | Genome-fragment | NA    | 0     |
| S12_k141_31783                                 | 1806  | No  | NA   | 0   | 0 | 1              | Not-determined  | Genome-fragment | NA    | 0     |
| S12_k141_333848                                | 1255  | No  | NA   | 0   | 0 | 0              | Not-determined  | Genome-fragment | NA    | 0     |
| S12_k141_49690                                 | 1529  | No  | NA   | 0   | 0 | 1              | Not-determined  | Genome-fragment | NA    | 0     |
| S9-final-viral-combined_k141_7173[full]        | 3538  | No  | NA   | 0   | 2 | Low-quality    | Genome-fragment | NA              | 4.87  | 0     |
| S9-final-viral-combined_k141_73744[full]       | 3538  | No  | NA   | 4   | 0 | Low-quality    | Genome-fragment | NA              | 8.71  | 0     |
| S12_k141_363281                                | 1065  | No  | NA   | 0   | 0 | 1              | Not-determined  | Genome-fragment | NA    | 0     |
| S12_k141_216740                                | 1028  | No  | NA   | 0   | 0 | 2              | Not-determined  | Genome-fragment | NA    | 0     |
| S12_k141_49707                                 | 1010  | No  | NA   | 0   | 0 | 0              | Not-determined  | Genome-fragment | NA    | 0     |
| S12_k141_98831                                 | 1370  | No  | NA   | 0   | 0 | 0              | Not-determined  | Genome-fragment | NA    | 0     |
| S4-final-viral-combined_k141_43190[full]       | 3538  | No  | NA   | 1   | 0 | Low-quality    | Genome-fragment | NA              | 7.85  | 0     |
| S1-final-viral-combined_k141_233138[full]      | 3539  | No  | NA   | 2   | 0 | Low-quality    | Genome-fragment | NA              | 5.18  | 0     |
| S12_k141_350318                                | 1745  | No  | NA   | 0   | 0 | 0              | Not-determined  | Genome-fragment | NA    | 0     |
| S12_k141_14983                                 | 1529  | No  | NA   | 0   | 0 | 1              | Not-determined  | Genome-fragment | NA    | 0     |
| S12_k141_131903                                | 3380  | No  | NA   | 0   | 0 | 3              | Not-determined  | Genome-fragment | NA    | 0     |
| S12_k141_49765                                 | 1146  | No  | NA   | 0   | 0 | 0              | Not-determined  | Genome-fragment | NA    | 0     |
| S12-final-viral-combined_k141_330785[full]     | 3539  | No  | NA   | 0   | 0 | 0              | Low-quality     | Genome-fragment | NA    | 2.64  |
| S2-final-viral-combined_k141_153569[full]      | 3539  | No  | NA   | 0   | 0 | 0              | Low-quality     | Genome-fragment | NA    | 5.35  |
| S12_k141_49794                                 | 1076  | No  | NA   | 0   | 0 | 1              | Not-determined  | Genome-fragment | NA    | 0     |
| S12_k141_300168                                | 1017  | No  | NA   | 0   | 0 | 0              | Not-determined  | Genome-fragment | NA    | 0     |
| S12_k141_83038                                 | 1844  | No  | NA   | 0   | 0 | 2              | Not-determined  | Genome-fragment | NA    | 0     |
| S12_k141_166296                                | 1186  | No  | NA   | 0   | 0 | 2              | Not-determined  | Genome-fragment | NA    | 0     |
| S11-final-viral-combined_k141_88124[full]      | 3540  | No  | NA   | 0   | 0 | 0              | Low-quality     | Genome-fragment | NA    | 2.52  |
| S2-final-viral-combined_k141_229308[full]      | 3540  | No  | NA   | 0   | 2 | Low-quality    | Genome-fragment | NA              | 1.81  | 0     |
| S12_k141_166309                                | 1443  | No  | NA   | 0   | 0 | 3              | Not-determined  | Genome-fragment | NA    | 0     |
| S12_k141_216819                                | 1220  | No  | NA   | 0   | 0 | 0              | Not-determined  | Genome-fragment | NA    | 0     |
| S12_k141_284258                                | 1965  | No  | NA   | 0   | 0 | 3              | Not-determined  | Genome-fragment | NA    | 0     |
| S12_k141_65478                                 | 1010  | No  | NA   | 0   | 0 | 0              | Not-determined  | Genome-fragment | NA    | 0     |
| S12_k141_183171                                | 1038  | No  | NA   | 0   | 0 | 1              | Not-determined  | Genome-fragment | NA    | 0     |
| S8-final-viral-combined_k141_206685[full]      | 3540  | No  | NA   | 0   | 0 | 0              | Low-quality     | Genome-fragment | NA    | 7.88  |
| S12_k141_284293                                | 1212  | No  | NA   | 0   | 0 | 0              | Not-determined  | Genome-fragment | NA    | 0     |
| S12_k141_317910                                | 1152  | No  | NA   | 0   | 0 | 1              | Not-determined  | Genome-fragment | NA    | 0     |
| S12_k141_31950                                 | 1014  | No  | NA   | 0   | 0 | 1              | Not-determined  | Genome-fragment | NA    | 0     |
| S12_k141_115215                                | 1051  | No  | NA   | 0   | 0 | 0              | Not-determined  | Genome-fragment | NA    | 0     |
| S9-final-viral-combined_k141_97492[full]       | 3541  | No  | NA   | 0   | 2 | Low-quality    | Genome-fragment | NA              | 2.53  | 0     |
| S12_k141_115218                                | 4889  | No  | NA   | 0   | 0 | 0              | Not-determined  | Genome-fragment | NA    | 0     |
| S12_k141_31977                                 | 1137  | No  | NA   | 0   | 0 | 0              | Not-determined  | Genome-fragment | NA    | 0     |
| S12_k141_166364                                | 3281  | No  | NA   | 0   | 0 | 0              | Not-determined  | Genome-fragment | NA    | 0     |
| S12_k141_31988                                 | 1271  | No  | NA   | 0   | 0 | 0              | Not-determined  | Genome-fragment | NA    | 0     |
| S12_k141_284333                                | 1052  | No  | NA   | 0   | 0 | 0              | Not-determined  | Genome-fragment | NA    | 0     |
| S9_k141_52496                                  | 3541  | No  | NA   | 0   | 0 | 2              | Low-quality     | Genome-fragment | NA    | 1.47  |
| S12_k141_65573                                 | 1302  | No  | NA   | 0   | 0 | 1              | Not-determined  | Genome-fragment | NA    | 0     |
| S12_k141_65582                                 | 1178  | No  | NA   | 0   | 0 | 1              | Not-determined  | Genome-fragment | NA    | 0     |
| S7_k141_228390                                 | 3541  | No  | NA   | 0   | 0 | 3              | Low-quality     | Genome-fragment | NA    | 1.66  |
| S12_k141_399932                                | 1179  | No  | NA   | 0   | 0 | 1              | Not-determined  | Genome-fragment | NA    | 0     |
| S12_k141_15232                                 | 1017  | No  | NA   | 0   | 0 | 1              | Not-determined  | Genome-fragment | NA    | 0     |
| S12_k141_383613                                | 2455  | No  | NA   | 0   | 0 | 2              | Not-determined  | Genome-fragment | NA    | 0     |
| S12_k141_200063                                | 1564  | No  | NA   | 0   | 0 | 0              | Not-determined  | Genome-fragment | NA    | 0     |
| S17-final-viral-combined_k141_198687[full]     | 3541  | No  | NA   | 0   | 0 | 2              | Low-quality     | Genome-fragment | NA    | 1.78  |
| S12_k141_99008                                 | 1079  | No  | NA   | 0   | 0 | 0              | Not-determined  | Genome-fragment | NA    | 0     |
| S12_k141_265799                                | 1005  | No  | NA   | 0   | 0 | 1              | Not-determined  | Genome-fragment | NA    | 0     |
| S12_k141_115319                                | 1711  | No  | NA   | 0   | 0 | 0              | Not-determined  | Genome-fragment | NA    | 0     |
| S12_k141_284483                                | 1467  | No  | NA   | 0   | 0 | 1              | Not-determined  | Genome-fragment | NA    | 0     |
| S17-final-viral-combined_k141_53060[full]      | 3541  | No  | NA   | 0   | 0 | 1              | Low-quality     | Genome-fragment | NA    | 1.8   |
| S12_k141_265812                                | 2204  | No  | NA   | 0   | 0 | 0              | Not-determined  | Genome-fragment | NA    | 0     |
| S12_k141_265814                                | 1300  | No  | NA   | 0   | 0 | 1              | Not-determined  | Genome-fragment | NA    | 0     |
| S12_k141_350539                                | 2834  | No  | NA   | 0   | 0 | 2              | Not-determined  | Genome-fragment | NA    | 0     |
| S12_k141_334112                                | 11259 | No  | NA   | 0   | 0 | 6              | Not-determined  | Genome-fragment | NA    | 0     |
| S12_k141_300324                                | 12930 | No  | NA   | 0   | 0 | 8              | Not-determined  | Genome-fragment | NA    | 0     |
| S12_k141_300330                                | 1069  | No  | NA   | 0   | 0 | 1              | Not-determined  | Genome-fragment | NA    | 0     |
| S12_k141_115392                                | 2045  | No  | NA   | 0   | 0 | 1              | Not-determined  | Genome-fragment | NA    | 0     |
| S12_k141_65633                                 | 1509  | No  | NA   | 0   | 0 | 1              | Not-determined  | Genome-fragment | NA    | 0     |
| S12_k141_334150                                | 1584  | No  | NA   | 0   | 0 | 1              | Not-determined  | Genome-fragment | NA    | 0     |
| S12_k141_334150                                | 1079  | No  | NA   | 0   | 0 | 0              | Not-determined  | Genome-fragment | NA    | 0     |
| S12_k141_166575                                | 2035  | No  | NA   | 0   | 0 | 1              | Not-determined  | Genome-fragment | NA    | 0     |
| S12_k141_65668                                 | 1085  | No  | NA   | 0   | 0 | 1              | Not-determined  | Genome-fragment | NA    | 0     |
| S12_k141_15395                                 | 3485  | No  | NA   | 0   | 0 | 0              | Not-determined  | Genome-fragment | NA    | 0     |
| S12-final-viral-combined_k141_66958[full]      | 3541  | No  | NA   | 1   | 0 | Low-quality    | Genome-fragment | NA              | 6.4   | 0     |
| S8_k141_120199                                 | 3542  | No  | NA   | 0   | 0 | 1              | Low-quality     | Genome-fragment | NA    | 4.22  |
| S12_k141_312103                                | 1072  | No  | NA   | 0   | 0 | 1              | Not-determined  | Genome-fragment | NA    | 0     |
| S12_k141_234315                                | 1396  | No  | NA   | 0   | 0 | 1              | Not-determined  | Genome-fragment | NA    | 0     |
| S12_k141_15462                                 | 2841  | No  | NA   | 0   | 0 | 1              | Not-determined  | Genome-fragment | NA    | 0     |
| S12_k141_265968                                | 3454  | No  | NA   | 0   | 0 | 2              | Not-determined  | Genome-fragment | NA    | 0     |
| S12_k141_50108                                 | 2881  | No  | NA   | 0   | 0 | 1              | Not-determined  | Genome-fragment | NA    | 0     |
| S12_k141_65780                                 | 3245  | No  | NA   | 0   | 0 | 1              | Not-determined  | Genome-fragment | NA    | 0     |
| S5-final-viral-combined_k141_6562[full]        | 3542  | No  | NA   | 0   | 0 | 0              | Low-quality     | Genome-fragment | NA    | 5.39  |
| S12_k141_249848                                | 2539  | No  | NA   | 0   | 0 | 0              | Not-determined  | Genome-fragment | NA    | 0     |
| S12_k141_99205                                 | 1286  | No  | NA   | 0   | 0 | 0              | Not-determined  | Genome-fragment | NA    | 0     |
| S12_k141_265987                                | 1095  | No  | NA   | 0   | 0 | 2              | Not-determined  | Genome-fragment | NA    | 0     |
| S6_k141_134674                                 | 3542  | No  | NA   | 0   | 0 | 0              | Low-quality     | Genome-fragment | NA    | 0.46  |
| S12_k141_183584                                | 1087  | No  | NA   | 0   | 0 | 1              | Not-determined  | Genome-fragment | NA    | 0     |
| S12_k141_200266                                | 1347  | No  | NA   | 0   | 0 | 1              | Not-determined  | Genome-fragment | NA    | 0     |
| S12_k141_300461                                | 1331  | No  | NA   | 0   | 0 | 1              | Not-determined  | Genome-fragment | NA    | 0     |
| S11_k141_95355                                 | 3543  | No  | NA   | 0   | 0 | 0              | Low-quality     | Genome-fragment | NA    | 3.43  |
| S12_k141_149041                                | 1055  | No  | NA   | 0   | 0 | 1              | Not-determined  | Genome-fragment | NA    | 0     |
| S12_k141_340984                                | 3543  | No  | NA   | 0   | 0 | 1              | Low-quality     | Genome-fragment | NA    | 1.75  |
| S12_k141_300476                                | 1310  | No  | NA   | 0   | 0 | 0              | Not-determined  | Genome-fragment | NA    | 0     |
| S12_k141_83497                                 | 1761  | No  | NA   | 0   | 0 | 1              | Not-determined  | Genome-fragment | NA    | 0     |
| S12_k141_300494                                | 1008  | No  | NA   | 0   | 0 | 2              | Not-determined  | Genome-fragment | NA    | 0     |
| S12_k141_383851                                | 22736 | No  | NA   | 1   | 0 | 3              | Medium-quality  | Genome-fragment | NA    | 55.69 |
| S12_k141_99315                                 | 1052  | No  | NA   | 0   | 0 | 0              | Not-determined  | Genome-fragment | NA    | 0     |
| S12_k141_365550                                | 2699  | No  | NA   | 0   | 0 | 2              | Not-determined  | Genome-fragment | NA    | 0     |
| S12_k141_312959                                | 1000  | No  | NA   | 0   | 0 | 0              | Not-determined  | Genome-fragment | NA    | 0     |
| S12_k141_249906                                | 1699  | No  | NA   | 0   | 0 | 0              | Not-determined  | Genome-fragment | NA    | 0     |
| S12_k141_65889                                 | 1478  | No  | NA   | 0   | 0 | 1              | Not-determined  | Genome-fragment | NA    | 0     |
| S12_k141_1491238                               | 1118  | No  | NA   | 0   | 0 | 0              | Not-determined  | Genome-fragment | NA    | 0     |
| S12_k141_115614                                | 1104  | No  | NA   | 0   | 0 | 1              | Not-determined  | Genome-fragment | NA    | 0     |
| S12_k141_149154                                | 1974  | No  | NA   | 0   | 0 | 0              | Not-determined  | Genome-fragment | NA    | 0     |
| S12_k141_249925                                | 1378  | No  | NA   | 0   | 0 | 0              | Not-determined  | Genome-fragment | NA    | 0     |
| S12_k141_166757                                | 1134  | No  | NA   | 0   | 0 | 0              | Not-determined  | Genome-fragment | NA    | 0     |
| S1_k141_209301                                 | 3544  | No  | NA   | 0   | 0 | 1              | Low-quality     | Genome-fragment | NA    | 7.25  |
| S12_k141_300562                                | 2002  | No  | NA   | 0   | 0 | 2              | Not-determined  | Genome-fragment | NA    | 0     |
| S12_k141_83093                                 | 4189  | No  | NA   | 0   | 0 | 1              | Not-determined  | Genome-fragment | NA    | 0     |
| S12_k141_217242                                | 1317  | No  | NA   | 0   | 0 | 0              | Not-determined  | Genome-fragment | NA    | 0     |
| S12_k141_99409                                 | 1178  | No  | NA   | 1   | 0 | 0              | Not-determined  | Genome-fragment | NA    | 0     |
| S2-final-viral-combined_k141_114313[full]      | 3544  | No  | NA   | 0   | 2 | Low-quality    | Genome-fragment | NA              | 5.85  | 0     |
| S12_k141_200445                                | 1061  | No  | NA   | 0</ |   |                |                 |                 |       |       |



|                                            |       |     |      |    |   |                |                 |       |       |
|--------------------------------------------|-------|-----|------|----|---|----------------|-----------------|-------|-------|
| S12-final-viral-combined_k141_289260]]full | 3548  | No  | NA   | 1  | 0 | Low-quality    | Genome-fragment | 8.24  | 0     |
| S8-final-viral-combined_k141_1785]]full    | 3548  | No  | NA   | 0  | 2 | Low-quality    | Genome-fragment | 2.13  | 0     |
| S12_k141_400130                            | 1149  | No  | NA   | 0  | 1 | Not-determined | Genome-fragment | NA    | 0     |
| S12_k141_384198                            | 3969  | No  | NA   | 0  | 1 | Not-determined | Genome-fragment | NA    | 0     |
| S12_k141_314668                            | 3454  | No  | NA   | 0  | 3 | Not-determined | Genome-fragment | NA    | 0     |
| S12_k141_365942                            | 2519  | No  | NA   | 0  | 0 | Not-determined | Genome-fragment | NA    | 0     |
| S5-final-viral-combined_k141_161844]]full  | 3549  | No  | NA   | 2  | 0 | Low-quality    | Genome-fragment | 4.31  | 0     |
| S9_k141_103568                             | 3550  | No  | NA   | 3  | 0 | Low-quality    | Genome-fragment | 7.61  | 0     |
| S12_k141_145961                            | 1716  | No  | NA   | 0  | 3 | Not-determined | Genome-fragment | NA    | 0     |
| S12_k141_250334                            | 1452  | No  | NA   | 0  | 1 | Not-determined | Genome-fragment | NA    | 0     |
| S12_k141_132779                            | 2289  | No  | NA   | 0  | 1 | Not-determined | Genome-fragment | NA    | 0     |
| S12_k141_116039                            | 1111  | No  | NA   | 0  | 1 | Not-determined | Genome-fragment | NA    | 0     |
| S17-final-viral-combined_k141_45377]]full  | 3550  | No  | NA   | 1  | 0 | Low-quality    | Genome-fragment | 5.1   | 0     |
| S12_k141_184014                            | 1040  | No  | NA   | 0  | 2 | Not-determined | Genome-fragment | NA    | 0     |
| S12_k141_266489                            | 1291  | No  | NA   | 0  | 1 | Not-determined | Genome-fragment | NA    | 0     |
| S12_k141_145987                            | 1250  | No  | NA   | 0  | 0 | Not-determined | Genome-fragment | NA    | 0     |
| S2-final-viral-combined_k141_3899]]full    | 3550  | No  | NA   | 0  | 2 | Low-quality    | Genome-fragment | 4     | 0     |
| S12_k141_400211                            | 1870  | No  | NA   | 0  | 0 | Not-determined | Genome-fragment | NA    | 0     |
| S6-final-viral-combined_k141_47485]]full   | 3550  | No  | NA   | 3  | 0 | Low-quality    | Genome-fragment | 2.98  | 0     |
| S12_k141_300983                            | 1565  | No  | NA   | 0  | 1 | Not-determined | Genome-fragment | NA    | 0     |
| S11_k141_259789                            | 3551  | No  | NA   | 0  | 1 | Low-quality    | Genome-fragment | 4.54  | 0     |
| S12-final-viral-combined_k141_154136]]full | 3551  | No  | NA   | 3  | 0 | Low-quality    | Genome-fragment | 8.36  | 0     |
| S12_k141_167256                            | 6883  | No  | NA   | 0  | 6 | Not-determined | Genome-fragment | NA    | 0     |
| S12_k141_149694                            | 1181  | No  | NA   | 0  | 0 | Not-determined | Genome-fragment | NA    | 0     |
| S12_k141_06514                             | 2161  | No  | NA   | 0  | 2 | Not-determined | Genome-fragment | NA    | 0     |
| S12_k141_334771                            | 1119  | No  | NA   | 0  | 1 | Not-determined | Genome-fragment | NA    | 0     |
| S12_k141_384396                            | 2030  | No  | NA   | 0  | 1 | Not-determined | Genome-fragment | NA    | 0     |
| S12_k141_132918                            | 1608  | No  | NA   | 0  | 1 | Not-determined | Genome-fragment | NA    | 0     |
| S12_k141_301091                            | 1199  | No  | NA   | 0  | 1 | Not-determined | Genome-fragment | NA    | 0     |
| S12_k141_167330                            | 1454  | No  | NA   | 0  | 1 | Not-determined | Genome-fragment | NA    | 0     |
| S12_k141_99923                             | 1087  | No  | NA   | 0  | 2 | Not-determined | Genome-fragment | NA    | 0     |
| S12_k141_99933                             | 3990  | No  | NA   | 2  | 0 | Not-determined | Genome-fragment | NA    | 0     |
| S1-final-viral-combined_k141_216435]]full  | 3552  | No  | NA   | 0  | 0 | Low-quality    | Genome-fragment | 6.01  | 0     |
| S12_k141_384492                            | 3833  | No  | NA   | 0  | 0 | Not-determined | Genome-fragment | NA    | 0     |
| S12_k141_16189                             | 4273  | No  | NA   | 0  | 0 | Not-determined | Genome-fragment | NA    | 0     |
| S12_k141_133021                            | 1514  | No  | NA   | 0  | 0 | Not-determined | Genome-fragment | NA    | 0     |
| S12_k141_384513                            | 1097  | No  | NA   | 0  | 0 | Not-determined | Genome-fragment | NA    | 0     |
| S12-final-viral-combined_k141_72673]]full  | 3552  | No  | NA   | 1  | 0 | Low-quality    | Genome-fragment | 7.11  | 0     |
| S2_k141_04716                              | 3552  | No  | NA   | 0  | 1 | Low-quality    | Genome-fragment | 6.37  | 0     |
| S12_k141_400422                            | 4031  | No  | NA   | 0  | 1 | Not-determined | Genome-fragment | NA    | 0     |
| S12_k141_16249                             | 2091  | No  | NA   | 0  | 0 | Not-determined | Genome-fragment | NA    | 0     |
| S12_k141_351399                            | 1266  | No  | NA   | 0  | 0 | Not-determined | Genome-fragment | NA    | 0     |
| S12_k141_250561                            | 2115  | No  | NA   | 0  | 1 | Not-determined | Genome-fragment | NA    | 0     |
| S12_k141_301179                            | 3227  | No  | NA   | 0  | 2 | Not-determined | Genome-fragment | NA    | 0     |
| S12_k141_36623                             | 1330  | No  | NA   | 0  | 0 | Not-determined | Genome-fragment | NA    | 0     |
| S11-final-viral-combined_k141_157054]]full | 3553  | No  | NA   | 1  | 0 | Low-quality    | Genome-fragment | 8.33  | 0     |
| S12_k141_250602                            | 4145  | No  | NA   | 0  | 0 | Not-determined | Genome-fragment | NA    | 0     |
| S12_k141_400506                            | 1269  | No  | NA   | 0  | 0 | Not-determined | Genome-fragment | NA    | 0     |
| S1_k141_230771                             | 3554  | No  | NA   | 1  | 0 | Low-quality    | Genome-fragment | 7.71  | 0     |
| S12_k141_133206                            | 1575  | No  | NA   | 0  | 2 | Not-determined | Genome-fragment | NA    | 0     |
| S12_k141_116396                            | 2822  | No  | NA   | 0  | 0 | Not-determined | Genome-fragment | NA    | 0     |
| S12_k141_06625                             | 1065  | No  | NA   | 0  | 1 | Not-determined | Genome-fragment | NA    | 0     |
| S12_k141_149964                            | 7169  | No  | NA   | 0  | 4 | Not-determined | Genome-fragment | NA    | 0     |
| S12_k141_366452                            | 4179  | No  | NA   | 0  | 0 | Not-determined | Genome-fragment | NA    | 0     |
| S12_k141_100155                            | 1045  | No  | NA   | 0  | 0 | Not-determined | Genome-fragment | NA    | 0     |
| S12_k141_266739                            | 1276  | No  | NA   | 0  | 1 | Not-determined | Genome-fragment | NA    | 0     |
| S12_k141_33115                             | 1169  | No  | NA   | 0  | 0 | Not-determined | Genome-fragment | NA    | 0     |
| S12_k141_102021                            | 1451  | No  | NA   | 0  | 0 | Not-determined | Genome-fragment | NA    | 0     |
| S5-final-viral-combined_k141_48135]]full   | 3554  | Yes | 2806 | 1  | 0 | Low-quality    | Genome-fragment | 1.59  | 21.05 |
| S7-final-viral-combined_k141_233589]]full  | 3554  | No  | NA   | 0  | 1 | Low-quality    | Genome-fragment | 5.52  | 0     |
| S12_k141_366551                            | 1279  | No  | NA   | 0  | 0 | Not-determined | Genome-fragment | NA    | 0     |
| S12_k141_366554                            | 2944  | No  | NA   | 0  | 3 | Not-determined | Genome-fragment | NA    | 0     |
| S12_k141_400619                            | 1342  | No  | NA   | 0  | 2 | Not-determined | Genome-fragment | NA    | 0     |
| S12_k141_16483                             | 5981  | No  | NA   | 0  | 3 | Not-determined | Genome-fragment | NA    | 0     |
| S12_k141_131285                            | 3103  | No  | NA   | 0  | 3 | Not-determined | Genome-fragment | NA    | 0     |
| S12-final-viral-combined_k141_290833]]full | 3554  | No  | NA   | 0  | 0 | Low-quality    | Genome-fragment | 7.21  | 0     |
| S12_k141_60891                             | 3554  | No  | NA   | 0  | 0 | Low-quality    | Genome-fragment | 5.44  | 0     |
| S6-final-viral-combined_k141_131181]]full  | 3554  | No  | NA   | 1  | 0 | Low-quality    | Genome-fragment | 2.15  | 0     |
| S12_k141_266928                            | 1002  | No  | NA   | 0  | 1 | Not-determined | Genome-fragment | NA    | 0     |
| S12_k141_16594                             | 6382  | No  | NA   | 0  | 2 | Not-determined | Genome-fragment | NA    | 0     |
| S7-final-viral-combined_k141_145582]]full  | 3556  | No  | NA   | 3  | 0 | Low-quality    | Genome-fragment | 7.69  | 0     |
| S12_k141_31292                             | 1198  | No  | NA   | 0  | 3 | Not-determined | Genome-fragment | NA    | 0     |
| S12_k141_116644                            | 5096  | No  | NA   | 0  | 3 | Not-determined | Genome-fragment | NA    | 0     |
| S12_k141_266993                            | 4174  | No  | NA   | 0  | 0 | Not-determined | Genome-fragment | NA    | 0     |
| S12_k141_266998                            | 1615  | No  | NA   | 0  | 0 | Not-determined | Genome-fragment | NA    | 0     |
| S5_k141_90019                              | 3557  | No  | NA   | 4  | 0 | Low-quality    | Genome-fragment | 8.51  | 0     |
| S12_k141_400760                            | 1063  | No  | NA   | 0  | 1 | Not-determined | Genome-fragment | NA    | 0     |
| S12_k141_16716                             | 4781  | No  | NA   | 0  | 6 | Not-determined | Genome-fragment | NA    | 0     |
| S12_k141_400775                            | 2030  | No  | NA   | 0  | 0 | Not-determined | Genome-fragment | NA    | 0     |
| S12_k141_384805                            | 1842  | No  | NA   | 0  | 1 | Not-determined | Genome-fragment | NA    | 0     |
| S12_k141_250877                            | 3378  | No  | NA   | 0  | 1 | Not-determined | Genome-fragment | NA    | 0     |
| S12_k141_150362                            | 1616  | No  | NA   | 0  | 1 | Not-determined | Genome-fragment | NA    | 0     |
| S12_k141_267097                            | 5750  | No  | NA   | 0  | 1 | Not-determined | Genome-fragment | NA    | 0     |
| S12_k141_116812                            | 1199  | No  | NA   | 0  | 1 | Not-determined | Genome-fragment | NA    | 0     |
| S12_k141_384908                            | 4111  | No  | NA   | 0  | 3 | Not-determined | Genome-fragment | NA    | 0     |
| S12-final-viral-combined_k141_31466]]full  | 3558  | No  | NA   | 0  | 0 | Low-quality    | Genome-fragment | 5.13  | 0     |
| S12_k141_367008                            | 1223  | No  | NA   | 0  | 1 | Not-determined | Genome-fragment | NA    | 0     |
| S2_k141_10651                              | 3558  | No  | NA   | 1  | 0 | Low-quality    | Genome-fragment | 7.43  | 0     |
| S12_k141_367044                            | 1208  | No  | NA   | 0  | 0 | Not-determined | Genome-fragment | NA    | 0     |
| S12_k141_367082                            | 2801  | No  | NA   | 0  | 2 | Not-determined | Genome-fragment | NA    | 0     |
| S12_k141_401004                            | 1030  | No  | NA   | 0  | 0 | Not-determined | Genome-fragment | NA    | 0     |
| S12_k141_133643                            | 3212  | No  | NA   | 0  | 1 | Not-determined | Genome-fragment | NA    | 0     |
| S12_k141_401080                            | 1634  | No  | NA   | 0  | 1 | Not-determined | Genome-fragment | NA    | 0     |
| S8-final-viral-combined_k141_97165]]full   | 3558  | No  | NA   | 0  | 1 | Low-quality    | Genome-fragment | 17.5  | 0     |
| S12_k141_367247                            | 4880  | No  | NA   | 0  | 3 | Not-determined | Genome-fragment | NA    | 0     |
| S12_k141_267450                            | 3450  | No  | NA   | 0  | 0 | Not-determined | Genome-fragment | NA    | 0     |
| S12_k141_367276                            | 1035  | No  | NA   | 0  | 1 | Not-determined | Genome-fragment | NA    | 0     |
| S12_k141_367306                            | 4217  | No  | NA   | 0  | 2 | Not-determined | Genome-fragment | NA    | 0     |
| S17-final-viral-combined_k141_1541]]full   | 3559  | No  | NA   | 0  | 2 | Low-quality    | Genome-fragment | 2.18  | 0     |
| S2-final-viral-combined_k141_45594]]full   | 3559  | No  | NA   | 0  | 1 | Low-quality    | Genome-fragment | 6.4   | 0     |
| S12_k141_367350                            | 1173  | No  | NA   | 0  | 0 | Not-determined | Genome-fragment | NA    | 0     |
| S12_k141_367407                            | 6084  | No  | NA   | 0  | 1 | Not-determined | Genome-fragment | NA    | 0     |
| S12_k141_267512                            | 8796  | No  | NA   | 0  | 3 | Not-determined | Genome-fragment | NA    | 0     |
| S12_k141_267515                            | 3189  | No  | NA   | 0  | 3 | Not-determined | Genome-fragment | NA    | 0     |
| S12_k141_401283                            | 6581  | No  | NA   | 0  | 1 | Not-determined | Genome-fragment | NA    | 0     |
| S12_k141_267538                            | 4255  | No  | NA   | 0  | 1 | Not-determined | Genome-fragment | NA    | 0     |
| S12_k141_267620                            | 9530  | No  | NA   | 0  | 0 | Not-determined | Genome-fragment | NA    | 0     |
| S12_k141_401366                            | 45090 | No  | NA   | 14 | 0 | Complete       | High-quality    | 100   | 0     |
| S12_k141_267680                            | 3219  | No  | NA   | 0  | 1 | Not-determined | Genome-fragment | NA    | 0     |
| S12_k141_401372                            | 87910 | No  | NA   | 17 | 4 | Complete       | High-quality    | 100   | 0     |
| S12_k141_367796                            | 1159  | No  | NA   | 0  | 1 | Not-determined | Genome-fragment | NA    | 0     |
| S12_k141_401381                            | 4542  | No  | NA   | 0  | 1 | Not-determined | Genome-fragment | NA    | 0     |
| S12_k141_401422                            | 2043  | No  | NA   | 0  | 0 | Not-determined | Genome-fragment | NA    | 0     |
| S12_k141_401423                            | 3605  | No  | NA   | 0  | 0 | Not-determined | Genome-fragment | NA    | 0     |
| S12_k141_367960                            | 1140  | No  | NA   | 0  | 1 | Not-determined | Genome-fragment | NA    | 0     |
| S12_k141_401480                            | 1062  | No  | NA   | 0  | 0 | Not-determined | Genome-fragment | NA    | 0     |
| S1_k141_85911                              | 3560  | No  | NA   | 0  | 2 | Low-quality    | Genome-fragment | 7.1   | 0     |
| S12_k141_368136                            | 1004  | No  | NA   | 0  | 1 | Not-determined | Genome-fragment | NA    | 0     |
| S2-final-viral-combined_k141_135289]]full  | 2191  | No  | NA   | 0  | 0 | Not-determined | Genome-fragment | NA    | 0     |
| S2-final-viral-combined_k141_207832]]full  | 46322 | No  | NA   | 19 | 0 | High-quality   | High-quality    | 98.24 | 0     |
| S2-final-viral-combined_k141_252546]]full  | 12671 | No  | NA   | 0  | 4 | Not-determined | Genome-fragment | NA    | 0     |
| S2-final-viral-combined_k141_177556]]full  | 3566  | No  | NA   | 0  | 0 | Not-determined | Genome-fragment | NA    | 0     |
| S2-final-viral-combined_k141_114705]]full  | 3560  | No  | NA   | 0  | 2 | Low-quality    | Genome-fragment | 2.82  | 0     |
| S2-final-viral-combined_k141_15783]]full   | 7543  | No  | NA   | 0  | 2 | Not-determined | Genome-fragment | NA    | 0     |
| S2-final-viral-combined_k141_248318]]full  | 24915 | No  | NA   | 16 | 0 | High-quality   | High-quality    | 98.49 | 0     |
| S2-final-viral-combined_k141_248329]]full  | 31650 | No  | NA   | 17 | 0 | High-quality   | High-quality    | 100   | 0     |
| S2-final-viral-combined_k141_248339]]full  | 2859  | No  | NA   | 0  | 0 | Not-determined | Genome-fragment | NA    | 0     |
| S2-final-viral-combined_k141_133605]]full  | 1043  | No  | NA   | 0  | 1 | Not-determined | Genome-fragment | NA    | 0     |
| S2-final-viral-combined_k141_31082]]full   | 1697  | No  | NA   | 0  | 1 | Not-determined | Genome-fragment | NA    | 0     |
| S2-final-viral-combined_k141_31083]]full   | 1616  | No  | NA   | 0  | 0 | Not-determined | Genome-fragment | NA    | 0     |
| S2-final-viral-combined_k141_196775]]full  | 1467  | No  | NA   | 0  | 0 | Not-determined | Genome-fragment | NA    | 0     |
| S2-final-viral-combined_k141_17505]]full   | 5330  | No  | NA   | 0  | 0 | Not-determined | Genome-fragment | NA    | 0     |
| S2-final-viral-combined_k141_134641]]full  | 1162  | No  | NA   | 0  | 0 | Not-determined | Genome-fragment | NA    | 0     |
| S1_k141_353380                             | 3561  | No  | NA   | 0  | 1 | Low-quality    | Genome-fragment | 6.69  | 0     |
| S2-final-viral-combined_k141_17507]]full   | 1503  | No  | NA   | 0  | 3 | Not-determined | Genome-fragment | NA    | 0     |
| S4-final-viral-combined_k141_2897]]full    | 3561  | No  | NA   | 0  | 2 | Low-quality    | Genome-fragment | 3.59  | 0     |
| S11-final-viral-combined_k141_301407]]full | 3562  | No  | NA   | 0  | 1 | Low-quality    | Genome-fragment | 5.34  | 0     |
| S2-final-viral-combined_k141_134646]]full  | 6100  | No  | NA   | 0  | 3 | Not-determined | Genome-fragment | NA    | 0     |
| S2-final-viral-combined_k141_207548]]full  | 1651  | No  | NA   | 0  | 1 | Not-determined | Genome-fragment | NA    | 0     |
| S11_k141_82014                             | 3562  | No  | NA   | 0  | 2 | Low-quality    | Genome-fragment | 1.92  | 0     |
| S2-final-viral-combined_k141_31084]]full   | 31856 | No  | NA   | 14 | 1 | Medium-quality | Genome-fragment | 51.91 | 0     |
| S2-final-viral-combined_k141_207556]]full  | 4507  | No  | NA   | 0  | 1 | Not-determined | Genome-fragment | NA    | 0     |
| S12-final-viral-combined_k141_151748]]full | 3562  | No  | NA   | 0  | 2 | Low-quality    | Genome-fragment | 2.15  | 0     |
| S                                          |       |     |      |    |   |                |                 |       |       |



|                                             |       |     |       |    |    |                |                 |       |       |
|---------------------------------------------|-------|-----|-------|----|----|----------------|-----------------|-------|-------|
| S11_k141_184124                             | 3568  | No  | NA    | 1  | 0  | Low-quality    | Genome-fragment | 5.83  | 0     |
| S1-final-viral-combined_k141_189176[full]   | 3568  | No  | NA    | 3  | 0  | Low-quality    | Genome-fragment | 6.32  | 0     |
| S12_k141_369496                             | 3568  | No  | NA    | 0  | 0  | Low-quality    | Genome-fragment | 11.8  | 0     |
| S1-final-viral-combined_k141_207362[full]   | 3570  | No  | NA    | 0  | 2  | Low-quality    | Genome-fragment | 1.62  | 0     |
| S2-final-viral-combined_k141_165832[full]   | 3752  | No  | NA    | 0  | 2  | Not-determined | Genome-fragment | NA    | 0     |
| S2-final-viral-combined_k141_41626[full]    | 2764  | No  | NA    | 0  | 2  | Not-determined | Genome-fragment | NA    | 0     |
| S2-final-viral-combined_k141_1501[full]     | 4946  | No  | NA    | 0  | 0  | Not-determined | Genome-fragment | NA    | 0     |
| S2-final-viral-combined_k141_137385[full]   | 3570  | No  | NA    | 0  | 3  | Low-quality    | Genome-fragment | 3.63  | 0     |
| S2-final-viral-combined_k141_31196[full]    | 1790  | No  | NA    | 0  | 2  | Not-determined | Genome-fragment | NA    | 0     |
| S2-final-viral-combined_k141_155495[full]   | 3169  | No  | NA    | 0  | 3  | Not-determined | Genome-fragment | NA    | 0     |
| S2-final-viral-combined_k141_31212[full]    | 4469  | No  | NA    | 0  | 1  | Not-determined | Genome-fragment | NA    | 0     |
| S2-final-viral-combined_k141_165833[full]   | 30167 | No  | NA    | 13 | 1  | Medium-quality | Genome-fragment | 84.28 | 0     |
| S2-final-viral-combined_k141_155497[full]   | 6490  | No  | NA    | 0  | 4  | Not-determined | Genome-fragment | NA    | 0     |
| S11_k141_30458                              | 3571  | No  | NA    | 3  | 0  | Low-quality    | Genome-fragment | 8.06  | 0     |
| S2-final-viral-combined_k141_93339[full]    | 1910  | No  | NA    | 0  | 1  | Not-determined | Genome-fragment | NA    | 0     |
| S2-final-viral-combined_k141_75468[full]    | 2569  | No  | NA    | 0  | 8  | Not-determined | Genome-fragment | NA    | 0     |
| S2-final-viral-combined_k141_62281[full]    | 5483  | No  | NA    | 0  | 1  | Not-determined | Genome-fragment | NA    | 0     |
| S2-final-viral-combined_k141_83023[full]    | 1572  | No  | NA    | 0  | 3  | Low-quality    | Genome-fragment | NA    | 0     |
| S7-final-viral-combined_k141_146613[full]   | 3573  | No  | NA    | 0  | 0  | Low-quality    | Genome-fragment | 10.27 | 0     |
| S7_k141_242824                              | 3573  | No  | NA    | 0  | 0  | Low-quality    | Genome-fragment | 3.76  | 0     |
| S17-final-viral-combined_k141_154638[full]  | 3573  | No  | NA    | 0  | 3  | Low-quality    | Genome-fragment | 5.08  | 0     |
| S17-k141_213355                             | 3573  | No  | NA    | 2  | 0  | Low-quality    | Genome-fragment | 9.16  | 0     |
| S11-final-viral-combined_k141_75404[full]   | 3574  | No  | NA    | 1  | 0  | Low-quality    | Genome-fragment | 4.22  | 0     |
| S2-final-viral-combined_k141_196964[full]   | 2534  | No  | NA    | 0  | 3  | Not-determined | Genome-fragment | NA    | 0     |
| S2-final-viral-combined_k141_41682[full]    | 1751  | No  | NA    | 0  | 0  | Not-determined | Genome-fragment | NA    | 0     |
| S2-final-viral-combined_k141_144055[full]   | 12876 | No  | NA    | 0  | 8  | Not-determined | Genome-fragment | NA    | 0     |
| S2-final-viral-combined_k141_155523[full]   | 3463  | No  | NA    | 0  | 2  | Not-determined | Genome-fragment | NA    | 0     |
| S2-final-viral-combined_k141_238345[full]   | 3756  | No  | NA    | 0  | 1  | Not-determined | Genome-fragment | NA    | 0     |
| S2-final-viral-combined_k141_23603[full]    | 4621  | No  | NA    | 0  | 4  | Not-determined | Genome-fragment | NA    | 0     |
| S12-final-viral-combined_k141_65457[full]   | 3574  | No  | NA    | 0  | 2  | Low-quality    | Genome-fragment | 1.7   | 0     |
| S8-final-viral-combined_k141_275574[full]   | 3574  | No  | NA    | 0  | 1  | Low-quality    | Genome-fragment | 9.26  | 0     |
| S17-final-viral-combined_k141_20234[full]   | 3575  | No  | NA    | 0  | 0  | Low-quality    | Genome-fragment | 11.88 | 0     |
| S2-final-viral-combined_k141_41729[full]    | 1541  | No  | NA    | 0  | 0  | Not-determined | Genome-fragment | NA    | 0     |
| S2-final-viral-combined_k141_176376[full]   | 41888 | No  | NA    | 20 | 1  | Medium-quality | Genome-fragment | 62.84 | 0     |
| S9-final-viral-combined_k141_125750[full]   | 3576  | No  | NA    | 0  | 2  | Low-quality    | Genome-fragment | 1.55  | 0     |
| S2-final-viral-combined_k141_228051[full]   | 1490  | No  | NA    | 0  | 0  | Not-determined | Genome-fragment | NA    | 0     |
| S2-final-viral-combined_k141_2431[full]     | 1716  | No  | NA    | 0  | 0  | Not-determined | Genome-fragment | NA    | 0     |
| S5-final-viral-combined_k141_100111[full]   | 3576  | No  | NA    | 0  | 1  | Low-quality    | Genome-fragment | 4.5   | 0     |
| S2-final-viral-combined_k141_144071[full]   | 2570  | No  | NA    | 0  | 2  | Not-determined | Genome-fragment | NA    | 0     |
| S12-final-viral-combined_k141_4400[full]    | 3576  | Yes | 3276  | 3  | 1  | Low-quality    | Genome-fragment | 6.69  | 8.39  |
| S2-final-viral-combined_k141_134893[full]   | 2021  | No  | NA    | 0  | 0  | Not-determined | Genome-fragment | NA    | 0     |
| S2-final-viral-combined_k141_41774[full]    | 2319  | No  | NA    | 0  | 2  | Not-determined | Genome-fragment | NA    | 0     |
| S2_k141_172368                              | 3576  | No  | NA    | 0  | 1  | Low-quality    | Genome-fragment | 7.71  | 0     |
| S7-final-viral-combined_k141_206994[full]   | 3577  | No  | NA    | 0  | 2  | Low-quality    | Genome-fragment | 4.76  | 0     |
| S2-final-viral-combined_k141_313521[full]   | 4190  | No  | NA    | 0  | 2  | Not-determined | Genome-fragment | NA    | 0     |
| S8-final-viral-combined_k141_117191[full]   | 3578  | No  | NA    | 0  | 0  | Low-quality    | Genome-fragment | 2.69  | 0     |
| S2-final-viral-combined_k141_217740[full]   | 6062  | No  | NA    | 0  | 1  | Not-determined | Genome-fragment | NA    | 0     |
| S8-final-viral-combined_k141_455021[full]   | 3578  | No  | NA    | 4  | 0  | Low-quality    | Genome-fragment | 4.23  | 0     |
| S2-final-viral-combined_k141_217741[full]   | 1743  | No  | NA    | 0  | 0  | Not-determined | Genome-fragment | NA    | 0     |
| S2-final-viral-combined_k141_228148[full]   | 2495  | No  | NA    | 0  | 2  | Not-determined | Genome-fragment | NA    | 0     |
| S2-final-viral-combined_k141_2981[full]     | 1838  | No  | NA    | 0  | 1  | Not-determined | Genome-fragment | NA    | 0     |
| S11-final-viral-combined_k141_111704[full]  | 3579  | No  | NA    | 2  | 0  | Low-quality    | Genome-fragment | 7.69  | 0     |
| S1_k141_322949                              | 3579  | No  | NA    | 0  | 4  | Low-quality    | Genome-fragment | 1.33  | 0     |
| S17-k141_65453                              | 3579  | No  | NA    | 0  | 1  | Low-quality    | Genome-fragment | 1.78  | 0     |
| S2-final-viral-combined_k141_72674[full]    | 4042  | No  | NA    | 0  | 0  | Not-determined | Genome-fragment | NA    | 0     |
| S2_k141_149354                              | 3579  | No  | NA    | 1  | 0  | Low-quality    | Genome-fragment | 6.42  | 0     |
| S2-final-viral-combined_k141_31398[full]    | 6369  | No  | NA    | 0  | 0  | Not-determined | Genome-fragment | NA    | 0     |
| S8-final-viral-combined_k141_21550[full]    | 3579  | Yes | 2065  | 1  | 1  | Low-quality    | Genome-fragment | 0.54  | 42.3  |
| S6-final-viral-combined_k141_73234[full]    | 3580  | No  | NA    | 0  | 0  | Low-quality    | Genome-fragment | 6.52  | 0     |
| S17-final-viral-combined_k141_200493[full]  | 3580  | No  | NA    | 0  | 1  | Low-quality    | Genome-fragment | 8.07  | 0     |
| S2-final-viral-combined_k141_83111[full]    | 1103  | No  | NA    | 0  | 0  | Not-determined | Genome-fragment | NA    | 0     |
| S2-final-viral-combined_k141_374651[full]   | 3580  | No  | NA    | 0  | 0  | Low-quality    | Genome-fragment | 5.86  | 0     |
| S5-final-viral-combined_k141_54884[full]    | 3581  | No  | NA    | 0  | 1  | Low-quality    | Genome-fragment | 1.65  | 0     |
| S2-final-viral-combined_k141_217769[full]   | 25116 | No  | NA    | 0  | 14 | Not-determined | Genome-fragment | NA    | 0     |
| S2-final-viral-combined_k141_133879[full]   | 3581  | No  | NA    | 0  | 1  | Low-quality    | Genome-fragment | 2.27  | 0     |
| S2-final-viral-combined_k141_103956[full]   | 1688  | No  | NA    | 0  | 1  | Not-determined | Genome-fragment | NA    | 0     |
| S2-final-viral-combined_k141_418611[full]   | 2871  | No  | NA    | 0  | 2  | Not-determined | Genome-fragment | NA    | 0     |
| S2-final-viral-combined_k141_39497[full]    | 3704  | No  | NA    | 0  | 3  | Not-determined | Genome-fragment | NA    | 0     |
| S11_k141_18195                              | 3582  | No  | NA    | 1  | 1  | Low-quality    | Genome-fragment | 6.08  | 0     |
| S7-final-viral-combined_k141_979551[full]   | 3582  | Yes | 2868  | 1  | 1  | Low-quality    | Genome-fragment | 3.69  | 19.93 |
| S2-final-viral-combined_k141_238439[full]   | 5716  | No  | NA    | 0  | 1  | Not-determined | Genome-fragment | NA    | 0     |
| S2-final-viral-combined_k141_155061[full]   | 2211  | No  | NA    | 0  | 2  | Not-determined | Genome-fragment | NA    | 0     |
| S2-final-viral-combined_k141_134979[full]   | 4791  | No  | NA    | 0  | 2  | Not-determined | Genome-fragment | NA    | 0     |
| S17-k141_4207                               | 3582  | No  | NA    | 0  | 2  | Low-quality    | Genome-fragment | 0.95  | 0     |
| S1-final-viral-combined_k141_553951[full]   | 3583  | No  | NA    | 0  | 3  | Low-quality    | Genome-fragment | 1.71  | 0     |
| S2-final-viral-combined_k141_186737[full]   | 2181  | No  | NA    | 0  | 1  | Not-determined | Genome-fragment | NA    | 0     |
| S2-final-viral-combined_k141_1245541[full]  | 2289  | No  | NA    | 0  | 1  | Not-determined | Genome-fragment | NA    | 0     |
| S2-final-viral-combined_k141_62377[full]    | 60903 | No  | NA    | 33 | 0  | High-quality   | High-quality    | 100   | 0     |
| S2-final-viral-combined_k141_335091[full]   | 1716  | No  | NA    | 0  | 0  | Not-determined | Genome-fragment | NA    | 0     |
| S2-final-viral-combined_k141_2281781[full]  | 6900  | No  | NA    | 0  | 2  | Not-determined | Genome-fragment | NA    | 0     |
| S2-final-viral-combined_k141_228180[full]   | 3971  | No  | NA    | 0  | 4  | Not-determined | Genome-fragment | NA    | 0     |
| S2-final-viral-combined_k141_1245751[full]  | 1014  | No  | NA    | 0  | 1  | Not-determined | Genome-fragment | NA    | 0     |
| S2-final-viral-combined_k141_105641[full]   | 2224  | No  | NA    | 0  | 1  | Not-determined | Genome-fragment | NA    | 0     |
| S1-final-viral-combined_k141_64951[full]    | 3583  | No  | NA    | 0  | 3  | Low-quality    | Genome-fragment | 1.69  | 0     |
| S2-final-viral-combined_k141_624461[full]   | 1200  | No  | NA    | 0  | 0  | Not-determined | Genome-fragment | NA    | 0     |
| S2-final-viral-combined_k141_40871[full]    | 3583  | No  | NA    | 0  | 0  | Low-quality    | Genome-fragment | 10.51 | 0     |
| S2-final-viral-combined_k141_105761[full]   | 1066  | No  | NA    | 0  | 0  | Not-determined | Genome-fragment | NA    | 0     |
| S2-final-viral-combined_k141_419341[full]   | 9150  | No  | NA    | 0  | 1  | Not-determined | Genome-fragment | NA    | 0     |
| S3-final-viral-combined_k141_147061[full]   | 3584  | No  | NA    | 0  | 0  | Low-quality    | Genome-fragment | 3.74  | 0     |
| S7-final-viral-combined_k141_153332[full]   | 3584  | No  | NA    | 0  | 2  | Low-quality    | Genome-fragment | 5.77  | 0     |
| S2-final-viral-combined_k141_272751[full]   | 29807 | No  | NA    | 6  | 0  | Medium-quality | Genome-fragment | 80.47 | 0     |
| S17-final-viral-combined_k141_257940[full]  | 3584  | No  | NA    | 1  | 0  | Low-quality    | Genome-fragment | 7.92  | 0     |
| S12-final-viral-combined_k141_351400[full]  | 3584  | No  | NA    | 0  | 0  | Low-quality    | Genome-fragment | 7.92  | 0     |
| S2-final-viral-combined_k141_168949[full]   | 3584  | No  | NA    | 0  | 2  | Low-quality    | Genome-fragment | 3.2   | 0     |
| S3-final-viral-combined_k141_599561[full]   | 3585  | No  | NA    | 0  | 0  | Low-quality    | Genome-fragment | 9.04  | 0     |
| S2-final-viral-combined_k141_3541[full]     | 1208  | No  | NA    | 0  | 1  | Not-determined | Genome-fragment | NA    | 0     |
| S2-final-viral-combined_k141_1350141[full]  | 30512 | No  | NA    | 16 | 2  | Medium-quality | Genome-fragment | 67.23 | 0     |
| S2-final-viral-combined_k141_1350241[full]  | 1953  | No  | NA    | 0  | 0  | Not-determined | Genome-fragment | NA    | 0     |
| S2-final-viral-combined_k141_106081[full]   | 2414  | No  | NA    | 0  | 0  | Not-determined | Genome-fragment | NA    | 0     |
| S2-final-viral-combined_k141_727741[full]   | 1812  | No  | NA    | 0  | 1  | Not-determined | Genome-fragment | NA    | 0     |
| S2-final-viral-combined_k141_1141381[full]  | 1989  | No  | NA    | 0  | 0  | Not-determined | Genome-fragment | NA    | 0     |
| S7-final-viral-combined_k141_202248[full]   | 3585  | No  | NA    | 0  | 0  | Low-quality    | Genome-fragment | 8.93  | 0     |
| S8_k141_163655                              | 3585  | No  | NA    | 1  | 3  | Low-quality    | Genome-fragment | 1.04  | 0     |
| S11-final-viral-combined_k141_2022661[full] | 3586  | No  | NA    | 2  | 0  | Low-quality    | Genome-fragment | 6.95  | 0     |
| S2_k141_65362                               | 3586  | No  | NA    | 0  | 1  | Low-quality    | Genome-fragment | 4.54  | 0     |
| S17-final-viral-combined_k141_2124351[full] | 3586  | No  | NA    | 0  | 2  | Low-quality    | Genome-fragment | 6.99  | 0     |
| S2-final-viral-combined_k141_1350561[full]  | 1448  | No  | NA    | 0  | 2  | Not-determined | Genome-fragment | NA    | 0     |
| S11_k141_242203                             | 3587  | No  | NA    | 0  | 2  | Low-quality    | Genome-fragment | 0.97  | 0     |
| S7-final-viral-combined_k141_1914711[full]  | 3587  | No  | NA    | 0  | 0  | Low-quality    | Genome-fragment | 7.95  | 0     |
| S2-final-viral-combined_k141_2385381[full]  | 1507  | No  | NA    | 0  | 2  | Not-determined | Genome-fragment | NA    | 0     |
| S2-final-viral-combined_k141_1765161[full]  | 2021  | No  | NA    | 0  | 2  | Not-determined | Genome-fragment | NA    | 0     |
| S8-final-viral-combined_k141_389221[full]   | 3587  | No  | NA    | 0  | 0  | Low-quality    | Genome-fragment | 3.52  | 0     |
| S1-final-viral-combined_k141_2880441[full]  | 3588  | Yes | 375   | 1  | 1  | Low-quality    | Genome-fragment | 0.24  | 89.55 |
| S2-final-viral-combined_k141_1247001[full]  | 1278  | No  | NA    | 0  | 0  | Not-determined | Genome-fragment | NA    | 0     |
| S12-final-viral-combined_k141_182161[full]  | 3588  | No  | NA    | 0  | 1  | Low-quality    | Genome-fragment | 0.4   | 0     |
| S2-final-viral-combined_k141_1247011[full]  | 4463  | No  | NA    | 0  | 2  | Not-determined | Genome-fragment | NA    | 0     |
| S3-final-viral-combined_k141_362681[full]   | 3589  | No  | NA    | 0  | 2  | Low-quality    | Genome-fragment | 0.37  | 0     |
| S2-final-viral-combined_k141_831841[full]   | 1731  | No  | NA    | 0  | 2  | Not-determined | Genome-fragment | 0     | 0     |
| S5-final-viral-combined_k141_1752301[full]  | 3589  | No  | NA    | 0  | 1  | Low-quality    | Genome-fragment | 6.29  | 0     |
| S2-final-viral-combined_k141_728471[full]   | 5001  | No  | NA    | 0  | 0  | Not-determined | Genome-fragment | NA    | 0     |
| S12-final-viral-combined_k141_1816091[full] | 3590  | Yes | 1955  | 1  | 1  | Low-quality    | Genome-fragment | 1.83  | 45.54 |
| S7-final-viral-combined_k141_1691461[full]  | 3591  | No  | NA    | 0  | 1  | Low-quality    | Genome-fragment | 7.38  | 0     |
| S8-final-viral-combined_k141_9411[full]     | 3591  | No  | NA    | 0  | 4  | Low-quality    | Genome-fragment | 2.13  | 0     |
| S2-final-viral-combined_k141_832031[full]   | 6302  | No  | NA    | 0  | 2  | Not-determined | Genome-fragment | NA    | 0     |
| S8-final-viral-combined_k141_838971[full]   | 3591  | No  | NA    | 0  | 0  | Low-quality    | Genome-fragment | 7.82  | 0     |
| S2-final-viral-combined_k141_106341[full]   | 1729  | No  | NA    | 0  | 1  | Not-determined | Genome-fragment | NA    | 0     |
| S2-final-viral-combined_k141_832251[full]   | 1443  | No  | NA    | 0  | 0  | Not-determined | Genome-fragment | NA    | 0     |
| S8-final-viral-combined_k141_484491[full]   | 3592  | Yes | 2143  | 0  | 1  | Low-quality    | Genome-fragment | 4.31  | 40.34 |
| S2-final-viral-combined_k141_1557691[full]  | 6690  | No  | NA    | 0  | 2  | Not-determined | Genome-fragment | NA    | 0     |
| S2-final-viral-combined_k141_832541[full]   | 1160  | No  | NA    | 0  | 1  | Not-determined | Genome-fragment | NA    | 0     |
| S2-final-viral-combined_k141_1454281[full]  | 9162  | No  | NA    | 0  | 1  | Not-determined | Genome-fragment | NA    | 0     |
| S2-final-viral-combined_k141_325191[full]   | 85217 | Yes | 34105 | 19 | 31 | Medium-quality | Genome-fragment | 59.25 | 59.89 |
| S1_k141_153526                              | 3592  | No  | NA    | 3  | 0  | Low-quality    | Genome-fragment | 6.15  | 0     |
| S2-final-viral-combined_k141_207441[full]   | 15540 | No  | NA    | 0  | 13 | Not-determined | Genome-fragment | NA    | 0     |
| S2-final-viral-combined_k141_314891[full]   | 3275  | No  | NA    | 0  | 0  | Not-determined | Genome-fragment |       |       |



|                                        |        |       |     |       |    |    |                |                 |    |       |       |
|----------------------------------------|--------|-------|-----|-------|----|----|----------------|-----------------|----|-------|-------|
| 52-final-viral-combined_k141_197043]]  | [full] | 1820  | No  | NA    | 0  | 1  | Not-determined | Genome-fragment | NA | 0     | 0     |
| 52-final-viral-combined_k141_207584]]  | [full] | 2168  | No  | NA    | 0  | 1  | Not-determined | Genome-fragment | NA | 0     | 0     |
| 52-final-viral-combined_k141_83324]]   | [full] | 1951  | No  | NA    | 0  | 0  | Not-determined | Genome-fragment | NA | 0     | 0     |
| 52-final-viral-combined_k141_73061]]   | [full] | 2938  | No  | NA    | 0  | 2  | Not-determined | Genome-fragment | NA | 0     | 0     |
| 52-final-viral-combined_k141_52266]]   | [full] | 1855  | No  | NA    | 0  | 1  | Not-determined | Genome-fragment | NA | 0     | 0     |
| 53-final-viral-combined_k141_134168]]  | [full] | 3597  | No  | NA    | 0  | 0  | Low-quality    | Genome-fragment | NA | 2.84  | 0     |
| 57-final-viral-combined_k141_206439]]  | [full] | 3597  | No  | NA    | 0  | 0  | Low-quality    | Genome-fragment | NA | 7.87  | 0     |
| 52-final-viral-combined_k141_52284]]   | [full] | 1555  | No  | NA    | 0  | 1  | Not-determined | Genome-fragment | NA | 0     | 0     |
| 52-final-viral-combined_k141_62615]]   | [full] | 1726  | No  | NA    | 0  | 1  | Not-determined | Genome-fragment | NA | 0     | 0     |
| 511-final-viral-combined_k141_135994]] | [full] | 3598  | No  | NA    | 0  | 1  | Low-quality    | Genome-fragment | NA | 9.66  | 0     |
| 52-final-viral-combined_k141_124921]]  | [full] | 7446  | No  | NA    | 0  | 3  | Not-determined | Genome-fragment | NA | 0     | 0     |
| 52-final-viral-combined_k141_42307]]   | [full] | 1390  | No  | NA    | 0  | 2  | Not-determined | Genome-fragment | NA | 0     | 0     |
| 52-final-viral-combined_k141_572]]     | [full] | 1750  | No  | NA    | 0  | 2  | Not-determined | Genome-fragment | NA | 0     | 0     |
| 511_k141_102396                        |        | 3598  | No  | NA    | 2  | 0  | Low-quality    | Genome-fragment | NA | 7.75  | 0     |
| 52-final-viral-combined_k141_31028]]   | [full] | 2787  | No  | NA    | 0  | 2  | Not-determined | Genome-fragment | NA | 0     | 0     |
| 52-final-viral-combined_k141_12107]]   | [full] | 1007  | No  | NA    | 3  | 0  | Not-determined | Genome-fragment | NA | 0     | 0     |
| 52-final-viral-combined_k141_155997]]  | [full] | 2376  | No  | NA    | 0  | 0  | Not-determined | Genome-fragment | NA | 0     | 0     |
| 52-final-viral-combined_k141_7312]]    | [full] | 1941  | No  | NA    | 0  | 1  | Not-determined | Genome-fragment | NA | 0     | 0     |
| 52-final-viral-combined_k141_176076]]  | [full] | 1266  | No  | NA    | 0  | 0  | Not-determined | Genome-fragment | NA | 0     | 0     |
| 52-final-viral-combined_k141_166175]]  | [full] | 1641  | No  | NA    | 0  | 0  | Not-determined | Genome-fragment | NA | 0     | 0     |
| 52-final-viral-combined_k141_42359]]   | [full] | 8767  | No  | NA    | 0  | 7  | Not-determined | Genome-fragment | NA | 0     | 0     |
| 52-final-viral-combined_k141_156015]]  | [full] | 2760  | No  | NA    | 0  | 1  | Not-determined | Genome-fragment | NA | 0     | 0     |
| 53_k141_124445                         |        | 3598  | No  | NA    | 0  | 2  | Low-quality    | Genome-fragment | NA | 2.06  | 0     |
| 54-final-viral-combined_k141_18363]]   | [full] | 3598  | No  | NA    | 2  | 0  | Low-quality    | Genome-fragment | NA | 6.38  | 0     |
| 52-final-viral-combined_k141_156037]]  | [full] | 2084  | No  | NA    | 0  | 3  | Not-determined | Genome-fragment | NA | 8.97  | 0     |
| 58-final-viral-combined_k141_33138]]   | [full] | 3598  | No  | NA    | 0  | 0  | Low-quality    | Genome-fragment | NA | 5.76  | 0     |
| 517-k141_127772                        |        | 3599  | No  | NA    | 0  | 0  | Low-quality    | Genome-fragment | NA | 0     | 0     |
| 52-final-viral-combined_k141_187086]]  | [full] | 3421  | No  | NA    | 0  | 1  | Not-determined | Genome-fragment | NA | 0     | 0     |
| 52-final-viral-combined_k141_135238]]  | [full] | 4064  | No  | NA    | 4  | 0  | Not-determined | Genome-fragment | NA | 0     | 0     |
| 512-final-viral-combined_k141_34777]]  | [full] | 3599  | No  | NA    | 2  | 0  | Low-quality    | Genome-fragment | NA | 6.99  | 0     |
| 511_k141_287145                        |        | 3600  | No  | NA    | 2  | 0  | Low-quality    | Genome-fragment | NA | 8.33  | 0     |
| 52-final-viral-combined_k141_104192]]  | [full] | 6659  | No  | NA    | 0  | 4  | Not-determined | Genome-fragment | NA | 0     | 0     |
| 52-final-viral-combined_k141_207696]]  | [full] | 6676  | No  | NA    | 0  | 2  | Not-determined | Genome-fragment | NA | 0     | 0     |
| 57-final-viral-combined_k141_18453]]   | [full] | 3600  | No  | NA    | 3  | 0  | Low-quality    | Genome-fragment | NA | 7.1   | 0     |
| 52-final-viral-combined_k141_238929]]  | [full] | 6118  | No  | NA    | 0  | 3  | Not-determined | Genome-fragment | NA | 0     | 0     |
| 52-final-viral-combined_k141_166234]]  | [full] | 3110  | No  | NA    | 0  | 1  | Not-determined | Genome-fragment | NA | 0     | 0     |
| 52-final-viral-combined_k141_135284]]  | [full] | 1307  | No  | NA    | 0  | 1  | Not-determined | Genome-fragment | NA | 0     | 0     |
| 52-final-viral-combined_k141_10849]]   | [full] | 1845  | No  | NA    | 0  | 1  | Not-determined | Genome-fragment | NA | 0     | 0     |
| 512_k141_384605                        |        | 3600  | No  | NA    | 0  | 1  | Low-quality    | Genome-fragment | NA | 2.92  | 0     |
| 51-final-viral-combined_k141_117161]]  | [full] | 3601  | No  | NA    | 0  | 0  | Low-quality    | Genome-fragment | NA | 5.48  | 0     |
| 52-final-viral-combined_k141_238929]]  | [full] | 4218  | No  | NA    | 19 | 1  | High-quality   | High-quality    | NA | 92.62 | 0     |
| 52-final-viral-combined_k141_176160]]  | [full] | 2997  | No  | NA    | 0  | 0  | Not-determined | Genome-fragment | NA | 0     | 0     |
| 52-final-viral-combined_k141_73186]]   | [full] | 1653  | No  | NA    | 0  | 2  | Not-determined | Genome-fragment | NA | 0     | 0     |
| 52-final-viral-combined_k141_93800]]   | [full] | 2087  | No  | NA    | 0  | 0  | Not-determined | Genome-fragment | NA | 0     | 0     |
| 52-final-viral-combined_k141_197149]]  | [full] | 1046  | No  | NA    | 0  | 1  | Not-determined | Genome-fragment | NA | 0     | 0     |
| 51-final-viral-combined_k141_174594]]  | [full] | 3601  | No  | NA    | 1  | 1  | Low-quality    | Genome-fragment | NA | 3.87  | 0     |
| 52-final-viral-combined_k141_154318]]  | [full] | 3602  | No  | NA    | 1  | 0  | Low-quality    | Genome-fragment | NA | 4.2   | 0     |
| 52-final-viral-combined_k141_112572]]  | [full] | 3602  | No  | NA    | 1  | 0  | Low-quality    | Genome-fragment | NA | 8.59  | 0     |
| 58-final-viral-combined_k141_45832]]   | [full] | 3602  | No  | NA    | 0  | 2  | Low-quality    | Genome-fragment | NA | 6.65  | 0     |
| 52-final-viral-combined_k141_705]]     | [full] | 1941  | No  | NA    | 0  | 3  | Not-determined | Genome-fragment | NA | 0     | 0     |
| 511-final-viral-combined_k141_291762]] | [full] | 3603  | No  | NA    | 1  | 0  | Low-quality    | Genome-fragment | NA | 9.17  | 0     |
| 55-final-viral-combined_k141_171217]]  | [full] | 3603  | Yes | 1346  | 1  | 2  | Low-quality    | Genome-fragment | NA | 1.93  | 62.64 |
| 52-final-viral-combined_k141_83423]]   | [full] | 6155  | No  | NA    | 0  | 4  | Not-determined | Genome-fragment | NA | 0     | 0     |
| 52-final-viral-combined_k141_165546]]  | [full] | 3603  | No  | NA    | 0  | 1  | Low-quality    | Genome-fragment | NA | 1.53  | 0     |
| 52-final-viral-combined_k141_83433]]   | [full] | 4080  | No  | NA    | 0  | 2  | Not-determined | Genome-fragment | NA | 0     | 0     |
| 56-final-viral-combined_k141_130968]]  | [full] | 3603  | No  | NA    | 0  | 2  | Low-quality    | Genome-fragment | NA | 4.26  | 0     |
| 511-final-viral-combined_k141_83882]]  | [full] | 3604  | No  | NA    | 3  | 0  | Low-quality    | Genome-fragment | NA | 7.65  | 0     |
| 52-final-viral-combined_k141_51803]]   | [full] | 10268 | No  | NA    | 0  | 7  | Not-determined | Genome-fragment | NA | 0     | 0     |
| 52-final-viral-combined_k141_166358]]  | [full] | 1151  | No  | NA    | 0  | 1  | Not-determined | Genome-fragment | NA | 0     | 0     |
| 52-final-viral-combined_k141_228587]]  | [full] | 1703  | No  | NA    | 0  | 1  | Not-determined | Genome-fragment | NA | 0     | 0     |
| 511-final-viral-combined_k141_239352]] | [full] | 3604  | No  | NA    | 2  | 0  | Low-quality    | Genome-fragment | NA | 8.31  | 0     |
| 52-final-viral-combined_k141_104277]]  | [full] | 1691  | No  | NA    | 0  | 3  | Not-determined | Genome-fragment | NA | 0     | 0     |
| 511-final-viral-combined_k141_161046]] | [full] | 3604  | No  | NA    | 0  | 1  | Low-quality    | Genome-fragment | NA | 1.68  | 0     |
| 52-final-viral-combined_k141_114351]]  | [full] | 1939  | No  | NA    | 0  | 2  | Not-determined | Genome-fragment | NA | 0     | 0     |
| 51-final-viral-combined_k141_389589]]  | [full] | 3604  | No  | NA    | 0  | 0  | Low-quality    | Genome-fragment | NA | 10.27 | 0     |
| 52-final-viral-combined_k141_42586]]   | [full] | 3335  | No  | NA    | 0  | 1  | Not-determined | Genome-fragment | NA | 0     | 0     |
| 52-final-viral-combined_k141_114372]]  | [full] | 2015  | No  | NA    | 0  | 1  | Not-determined | Genome-fragment | NA | 0     | 0     |
| 51-final-viral-combined_k141_150083]]  | [full] | 3606  | No  | NA    | 1  | 0  | Low-quality    | Genome-fragment | NA | 6.69  | 0     |
| 52-final-viral-combined_k141_11070]]   | [full] | 2967  | No  | NA    | 0  | 1  | Not-determined | Genome-fragment | NA | 0     | 0     |
| 52-final-viral-combined_k141_187180]]  | [full] | 1278  | No  | NA    | 0  | 0  | Not-determined | Genome-fragment | NA | 0     | 0     |
| 52-final-viral-combined_k141_176886]]  | [full] | 2961  | No  | NA    | 0  | 2  | Not-determined | Genome-fragment | NA | 0     | 0     |
| 511-final-viral-combined_k141_147905]] | [full] | 3607  | No  | NA    | 0  | 3  | Low-quality    | Genome-fragment | NA | 1.69  | 0     |
| 52-final-viral-combined_k141_166415]]  | [full] | 1789  | No  | NA    | 0  | 0  | Not-determined | Genome-fragment | NA | 0     | 0     |
| 511-final-viral-combined_k141_283223]] | [full] | 3608  | No  | NA    | 3  | 0  | Low-quality    | Genome-fragment | NA | 9.25  | 0     |
| 52-final-viral-combined_k141_208405]]  | [full] | 3608  | No  | NA    | 0  | 1  | Low-quality    | Genome-fragment | NA | 6.94  | 0     |
| 52-final-viral-combined_k141_104308]]  | [full] | 2020  | No  | NA    | 0  | 1  | Not-determined | Genome-fragment | NA | 0     | 0     |
| 52-final-viral-combined_k141_187211]]  | [full] | 1710  | No  | NA    | 0  | 0  | Not-determined | Genome-fragment | NA | 0     | 0     |
| 52-final-viral-combined_k141_228710]]  | [full] | 2105  | No  | NA    | 0  | 0  | Not-determined | Genome-fragment | NA | 0     | 0     |
| 58-final-viral-combined_k141_166286]]  | [full] | 3608  | No  | NA    | 0  | 2  | Low-quality    | Genome-fragment | NA | 6.12  | 0     |
| 52-final-viral-combined_k141_73231]]   | [full] | 4139  | No  | NA    | 0  | 2  | Not-determined | Genome-fragment | NA | 0     | 0     |
| 52-final-viral-combined_k141_145413]]  | [full] | 2768  | No  | NA    | 0  | 0  | Not-determined | Genome-fragment | NA | 0     | 0     |
| 51-final-viral-combined_k141_2113]]    | [full] | 3610  | No  | NA    | 0  | 2  | Low-quality    | Genome-fragment | NA | 3.16  | 0     |
| 52-final-viral-combined_k141_197236]]  | [full] | 1749  | No  | NA    | 0  | 1  | Not-determined | Genome-fragment | NA | 0     | 0     |
| 58_k141_76908                          |        | 3610  | No  | NA    | 0  | 2  | Low-quality    | Genome-fragment | NA | 6.24  | 0     |
| 58_k141_125374                         |        | 3610  | No  | NA    | 0  | 2  | Low-quality    | Genome-fragment | NA | 1.94  | 0     |
| 51-final-viral-combined_k141_169950]]  | [full] | 3611  | No  | NA    | 0  | 1  | Low-quality    | Genome-fragment | NA | 2.18  | 0     |
| 52-final-viral-combined_k141_114448]]  | [full] | 2795  | No  | NA    | 0  | 1  | Not-determined | Genome-fragment | NA | 0     | 0     |
| 52-final-viral-combined_k141_156134]]  | [full] | 1376  | No  | NA    | 0  | 2  | Not-determined | Genome-fragment | NA | 0     | 0     |
| 54-final-viral-combined_k141_149457]]  | [full] | 1911  | No  | NA    | 0  | 1  | Low-quality    | Genome-fragment | NA | 8.69  | 0     |
| 52-final-viral-combined_k141_114465]]  | [full] | 1933  | No  | NA    | 0  | 1  | Not-determined | Genome-fragment | NA | 0     | 0     |
| 58-final-viral-combined_k141_10276]]   | [full] | 3611  | No  | NA    | 0  | 1  | Low-quality    | Genome-fragment | NA | 3.78  | 0     |
| 52-final-viral-combined_k141_246159]]  | [full] | 3612  | No  | NA    | 0  | 2  | Low-quality    | Genome-fragment | NA | 2.57  | 0     |
| 51-final-viral-combined_k141_314889]]  | [full] | 3613  | No  | NA    | 0  | 2  | Low-quality    | Genome-fragment | NA | 2.31  | 0     |
| 52-final-viral-combined_k141_93845]]   | [full] | 56715 | Yes | 29207 | 16 | 18 | Medium-quality | Genome-fragment | NA | 56.12 | 48.5  |
| 57-final-viral-combined_k141_227826]]  | [full] | 3613  | No  | NA    | 0  | 2  | Low-quality    | Genome-fragment | NA | 2.6   | 0     |
| 52-final-viral-combined_k141_52473]]   | [full] | 1785  | No  | NA    | 0  | 1  | Not-determined | Genome-fragment | NA | 0     | 0     |
| 512-final-viral-combined_k141_87171]]  | [full] | 3613  | No  | NA    | 0  | 0  | Low-quality    | Genome-fragment | NA | 2.76  | 0     |
| 52-final-viral-combined_k141_218169]]  | [full] | 2161  | No  | NA    | 0  | 2  | Not-determined | Genome-fragment | NA | 0     | 0     |
| 52-final-viral-combined_k141_104155]]  | [full] | 2860  | No  | NA    | 0  | 0  | Not-determined | Genome-fragment | NA | 0     | 0     |
| 52-final-viral-combined_k141_73000]]   | [full] | 1630  | No  | NA    | 0  | 1  | Not-determined | Genome-fragment | NA | 0     | 0     |
| 52-final-viral-combined_k141_62727]]   | [full] | 1737  | No  | NA    | 0  | 1  | Not-determined | Genome-fragment | NA | 0     | 0     |
| 54-final-viral-combined_k141_132215]]  | [full] | 3613  | No  | NA    | 0  | 0  | Low-quality    | Genome-fragment | NA | 8.41  | 0     |
| 52-final-viral-combined_k141_218200]]  | [full] | 4848  | No  | NA    | 0  | 2  | Not-determined | Genome-fragment | NA | 0     | 0     |
| 52-final-viral-combined_k141_176970]]  | [full] | 1260  | No  | NA    | 0  | 2  | Not-determined | Genome-fragment | NA | 0     | 0     |
| 511-final-viral-combined_k141_16734]]  | [full] | 3614  | No  | NA    | 0  | 2  | Low-quality    | Genome-fragment | NA | 5.79  | 0     |
| 52-final-viral-combined_k141_145913]]  | [full] | 1495  | No  | NA    | 0  | 1  | Not-determined | Genome-fragment | NA | 0     | 0     |
| 53_k141_44345                          |        | 3614  | No  | NA    | 0  | 0  | Low-quality    | Genome-fragment | NA | 3.67  | 0     |
| 52-final-viral-combined_k141_83595]]   | [full] | 2820  | No  | NA    | 0  | 3  | Not-determined | Genome-fragment | NA | 0     | 0     |
| 52-final-viral-combined_k141_166507]]  | [full] | 9213  | No  | NA    | 0  | 0  | Not-determined | Genome-fragment | NA | 0     | 0     |
| 52-final-viral-combined_k141_218221]]  | [full] | 2474  | No  | NA    | 0  | 1  | Not-determined | Genome-fragment | NA | 0     | 0     |
| 52-final-viral-combined_k141_104387]]  | [full] | 2319  | No  | NA    | 0  | 1  | Not-determined | Genome-fragment | NA | 1.83  | 0     |
| 517-k141_2151                          |        | 3614  | No  | NA    | 0  | 0  | Low-quality    | Genome-fragment | NA | 0     | 0     |
| 54_k141_59819                          |        | 3614  | No  | NA    | 0  | 0  | Low-quality    | Genome-fragment | NA | 8.03  | 0     |
| 52-final-viral-combined_k141_135364]]  | [full] | 4185  | No  | NA    | 0  | 1  | Not-determined | Genome-fragment | NA | 0     | 0     |
| 52-final-viral-combined_k141_111446]]  | [full] | 4219  | No  | NA    | 0  | 2  | Not-determined | Genome-fragment | NA | 0     | 0     |
| 55-final-viral-combined_k141_197338]]  | [full] | 3615  | No  | NA    | 0  | 2  | Low-quality    | Genome-fragment | NA | 5.78  | 0     |
| 52-final-viral-combined_k141_228847]]  | [full] | 1355  | No  | NA    | 0  | 1  | Not-determined | Genome-fragment | NA | 0     | 0     |
| 517-final-viral-combined_k141_194274]] | [full] | 3615  | No  | NA    | 3  | 0  | Low-quality    | Genome-fragment | NA | 8.57  | 0     |
| 517-final-viral-combined_k141_95737]]  | [full] | 3615  | No  | NA    | 1  | 0  | Low-quality    | Genome-fragment | NA | 5.2   | 0     |
| 52-final-viral-combined_k141_228871]]  | [full] | 1324  | No  | NA    | 0  | 2  | Not-determined | Genome-fragment | NA | 0     | 0     |



|                                             |        |     |    |      |    |                |                 |       |       |
|---------------------------------------------|--------|-----|----|------|----|----------------|-----------------|-------|-------|
| 54_k141_101708                              | 3626   | No  | NA | 0    | 2  | Low-quality    | Genome-fragment | 2.07  | 0     |
| S2-final-viral-combined_k141_734041[full]   | 1018   | No  | NA | 0    | 0  | Not-determined | Genome-fragment | NA    | 0     |
| S2-final-viral-combined_k141_734101[full]   | 2135   | No  | NA | 0    | 0  | Not-determined | Genome-fragment | NA    | 0     |
| S9_k141_124043                              | 3627   | No  | NA | 0    | 1  | Low-quality    | Genome-fragment | 4.5   | 0     |
| S12_k141_124204                             | 3627   | No  | NA | 0    | 0  | Low-quality    | Genome-fragment | 7.7   | 0     |
| S2-final-viral-combined_k141_1666651[full]  | 46255  | Yes | NA | 18   | 6  | Medium-quality | Genome-fragment | 89.88 | 31.59 |
| S4-final-viral-combined_k141_788061[full]   | 3627   | No  | NA | 0    | 2  | Low-quality    | Genome-fragment | 8.5   | 0     |
| S14-final-viral-combined_k141_1013101[full] | 3628   | No  | NA | 0    | 0  | Low-quality    | Genome-fragment | 3.28  | 0     |
| S17-final-viral-combined_k141_2215451[full] | 3628   | No  | NA | 0    | 1  | Low-quality    | Genome-fragment | 4.17  | 0     |
| S12-final-viral-combined_k141_1170631[full] | 3628   | No  | NA | 3    | 0  | Low-quality    | Genome-fragment | 7.27  | 0     |
| S1-final-viral-combined_k141_2407441[full]  | 3629   | No  | NA | 0    | 2  | Low-quality    | Genome-fragment | 0.87  | 0     |
| S2-final-viral-combined_k141_113721[full]   | 1398   | No  | NA | 0    | 1  | Not-determined | Genome-fragment | NA    | 0     |
| S12_k141_205431                             | 3629   | No  | NA | 0    | 3  | Low-quality    | Genome-fragment | 1.93  | 0     |
| S9-final-viral-combined_k141_945971[full]   | 3630   | No  | NA | 0    | 2  | Low-quality    | Genome-fragment | 3.54  | 0     |
| S2-final-viral-combined_k141_10051[full]    | 1696   | No  | NA | 0    | 2  | Not-determined | Genome-fragment | NA    | 0     |
| S2-final-viral-combined_k141_1083891[full]  | 145503 | No  | NA | 36   | 5  | High-quality   | Genome-fragment | 100   | 0     |
| S2-final-viral-combined_k141_10181[full]    | 1033   | No  | NA | 0    | 0  | Not-determined | Genome-fragment | NA    | 0     |
| S2-final-viral-combined_k141_1667031[full]  | 2481   | No  | NA | 0    | 1  | Not-determined | Genome-fragment | NA    | 0     |
| S9_k141_55528                               | 3630   | No  | NA | 0    | 0  | Low-quality    | Genome-fragment | 10.61 | 0     |
| S11-final-viral-combined_k141_995531[full]  | 3630   | No  | NA | 0    | 3  | Low-quality    | Genome-fragment | 2.45  | 0     |
| S11-final-viral-combined_k141_1271301[full] | 3630   | No  | NA | 0    | 0  | Low-quality    | Genome-fragment | 8.48  | 0     |
| S7-final-viral-combined_k141_122331[full]   | 3630   | No  | NA | 0    | 0  | Low-quality    | Genome-fragment | 8.65  | 0     |
| S12-final-viral-combined_k141_1874691[full] | 3630   | No  | NA | 0    | 3  | Low-quality    | Genome-fragment | 2.44  | 0     |
| S2-final-viral-combined_k141_1564201[full]  | 11985  | No  | NA | 0    | 2  | Not-determined | Genome-fragment | NA    | 0     |
| S11-final-viral-combined_k141_1826281[full] | 3631   | No  | NA | 1    | 0  | Low-quality    | Genome-fragment | 5.98  | 0     |
| S2-final-viral-combined_k141_175471[full]   | 5109   | No  | NA | 0    | 2  | Not-determined | Genome-fragment | NA    | 0     |
| S2-final-viral-combined_k141_1461041[full]  | 14197  | No  | NA | 0    | 2  | Not-determined | Genome-fragment | NA    | 0     |
| S2-final-viral-combined_k141_1290851[full]  | 7986   | No  | NA | 0    | 6  | Not-determined | Genome-fragment | NA    | 0     |
| S2-final-viral-combined_k141_1146511[full]  | 4712   | No  | NA | 0    | 4  | Not-determined | Genome-fragment | NA    | 0     |
| S2-final-viral-combined_k141_2390831[full]  | 5896   | No  | NA | 0    | 3  | Not-determined | Genome-fragment | NA    | 0     |
| S14-final-viral-combined_k141_85601[full]   | 3631   | No  | NA | 0    | 0  | Low-quality    | Genome-fragment | 6.99  | 0     |
| S2-final-viral-combined_k141_1393181[full]  | 2781   | No  | NA | 0    | 2  | Not-determined | Genome-fragment | NA    | 0     |
| S2-final-viral-combined_k141_1461391[full]  | 1750   | No  | NA | 0    | 0  | Not-determined | Genome-fragment | NA    | 0     |
| S2-final-viral-combined_k141_1526911[full]  | 2189   | No  | NA | 0    | 0  | Not-determined | Genome-fragment | NA    | 0     |
| S2-final-viral-combined_k141_430001[full]   | 1225   | No  | NA | 0    | 1  | Not-determined | Genome-fragment | NA    | 0     |
| S8_k141_120244                              | 3631   | No  | NA | 0    | 1  | Low-quality    | Genome-fragment | 5.21  | 0     |
| S11_k141_139484                             | 3632   | No  | NA | 1    | 0  | Low-quality    | Genome-fragment | 30.41 | 0     |
| S2-final-viral-combined_k141_2200991[full]  | 29644  | No  | NA | 0    | 13 | Not-determined | Genome-fragment | NA    | 0     |
| S2-final-viral-combined_k141_229101[full]   | 6429   | No  | NA | 0    | 4  | Not-determined | Genome-fragment | NA    | 0     |
| S2-final-viral-combined_k141_1148461[full]  | 2664   | No  | NA | 0    | 2  | Not-determined | Genome-fragment | NA    | 0     |
| S14-final-viral-combined_k141_1149371[full] | 3632   | No  | NA | 0    | 3  | Low-quality    | Genome-fragment | 1.77  | 0     |
| S2-final-viral-combined_k141_5296981[full]  | 2668   | No  | NA | 0    | 2  | Not-determined | Genome-fragment | NA    | 0     |
| S2-final-viral-combined_k141_736291[full]   | 1264   | No  | NA | 0    | 0  | Not-determined | Genome-fragment | NA    | 0     |
| S2-final-viral-combined_k141_1356151[full]  | 3880   | No  | NA | 0    | 1  | Not-determined | Genome-fragment | NA    | 0     |
| S2-final-viral-combined_k141_1773791[full]  | 2258   | No  | NA | 0    | 0  | Not-determined | Genome-fragment | NA    | 0     |
| S2-final-viral-combined_k141_1773821[full]  | 4095   | No  | NA | 0    | 0  | Not-determined | Genome-fragment | NA    | 0     |
| S2-final-viral-combined_k141_1668171[full]  | 2066   | No  | NA | 0    | 1  | Not-determined | Genome-fragment | NA    | 0     |
| S2-final-viral-combined_k141_2291201[full]  | 1263   | No  | NA | 0    | 0  | Not-determined | Genome-fragment | NA    | 0     |
| S8-final-viral-combined_k141_2750511[full]  | 3632   | No  | NA | 0    | 1  | Low-quality    | Genome-fragment | 12.2  | 0     |
| S11-final-viral-combined_k141_1188571[full] | 3633   | No  | NA | 0    | 0  | Low-quality    | Genome-fragment | 5.39  | 0     |
| S5-final-viral-combined_k141_103771[full]   | 3633   | No  | NA | 0    | 2  | Low-quality    | Genome-fragment | 1.83  | 0     |
| S2-final-viral-combined_k141_1668251[full]  | 5842   | No  | NA | 0    | 2  | Not-determined | Genome-fragment | NA    | 0     |
| S5-final-viral-combined_k141_533331[full]   | 3633   | No  | NA | 0    | 0  | Low-quality    | Genome-fragment | 6.57  | 0     |
| S2-final-viral-combined_k141_1668351[full]  | 3398   | No  | NA | 0    | 0  | Not-determined | Genome-fragment | NA    | 0     |
| S12-final-viral-combined_k141_2922401[full] | 3633   | No  | NA | 0    | 4  | Low-quality    | Genome-fragment | 6.64  | 0     |
| S2-final-viral-combined_k141_1462151[full]  | 4695   | No  | NA | 0    | 2  | Not-determined | Genome-fragment | NA    | 0     |
| S2-final-viral-combined_k141_1356401[full]  | 2980   | No  | NA | 0    | 1  | Not-determined | Genome-fragment | NA    | 0     |
| S2_k141_116154                              | 3633   | No  | NA | 0    | 0  | Low-quality    | Genome-fragment | 13.26 | 0     |
| S2-final-viral-combined_k141_121271[full]   | 3630   | No  | NA | 0    | 0  | Not-determined | Genome-fragment | NA    | 0     |
| S2-final-viral-combined_k141_1047161[full]  | 1860   | No  | NA | 0    | 1  | Not-determined | Genome-fragment | NA    | 0     |
| S2-final-viral-combined_k141_1254301[full]  | 4626   | No  | NA | 0    | 2  | Not-determined | Genome-fragment | NA    | 0     |
| S2-final-viral-combined_k141_1212121[full]  | 3338   | No  | NA | 0    | 3  | Not-determined | Genome-fragment | NA    | 0     |
| S2-final-viral-combined_k141_321351[full]   | 2284   | No  | NA | 0    | 1  | Not-determined | Genome-fragment | NA    | 0     |
| S2-final-viral-combined_k141_1564801[full]  | 1199   | No  | NA | 0    | 1  | Not-determined | Genome-fragment | NA    | 0     |
| S2-final-viral-combined_k141_2081921[full]  | 1334   | No  | NA | 0    | 0  | Not-determined | Genome-fragment | NA    | 0     |
| S2-final-viral-combined_k141_840631[full]   | 6593   | No  | NA | 0    | 4  | Not-determined | Genome-fragment | NA    | 0     |
| S2-final-viral-combined_k141_2082041[full]  | 1978   | No  | NA | 0    | 2  | Not-determined | Genome-fragment | NA    | 0     |
| S14-final-viral-combined_k141_2678151[full] | 3635   | No  | NA | 0    | 2  | Low-quality    | Genome-fragment | 8.4   | 0     |
| S7-final-viral-combined_k141_850681[full]   | 3635   | No  | NA | 0    | 1  | Low-quality    | Genome-fragment | 4.39  | 0     |
| S2-final-viral-combined_k141_942211[full]   | 2064   | No  | NA | 0    | 2  | Not-determined | Genome-fragment | NA    | 0     |
| S11-final-viral-combined_k141_2447751[full] | 3636   | No  | NA | 4    | 0  | Low-quality    | Genome-fragment | 5.89  | 0     |
| S2-final-viral-combined_k141_1462701[full]  | 1483   | No  | NA | 0    | 0  | Not-determined | Genome-fragment | NA    | 0     |
| S2-final-viral-combined_k141_1462751[full]  | 2265   | No  | NA | 0    | 2  | Not-determined | Genome-fragment | NA    | 0     |
| S2-final-viral-combined_k141_52831[full]    | 1019   | No  | NA | 0    | 1  | Not-determined | Genome-fragment | NA    | 0     |
| S2-final-viral-combined_k141_1774071[full]  | 6776   | No  | NA | 0    | 0  | Not-determined | Genome-fragment | NA    | 0     |
| S3-final-viral-combined_k141_774831[full]   | 3636   | No  | NA | 0    | 1  | Low-quality    | Genome-fragment | 6.32  | 0     |
| S2-final-viral-combined_k141_1254891[full]  | 2386   | No  | NA | 0    | 2  | Not-determined | Genome-fragment | NA    | 0     |
| S2-final-viral-combined_k141_840961[full]   | 1178   | No  | NA | 0    | 1  | Not-determined | Genome-fragment | NA    | 0     |
| S2-final-viral-combined_k141_431401[full]   | 3992   | No  | NA | 0    | 1  | Not-determined | Genome-fragment | NA    | 0     |
| S5-final-viral-combined_k141_1776881[full]  | 3636   | No  | NA | 0    | 0  | Low-quality    | Genome-fragment | 5     | 0     |
| S2-final-viral-combined_k141_737701[full]   | 5111   | No  | NA | 0    | 0  | Not-determined | Genome-fragment | NA    | 0     |
| S7-final-viral-combined_k141_498381[full]   | 3636   | No  | NA | 0    | 1  | Low-quality    | Genome-fragment | 10.12 | 0     |
| S4-final-viral-combined_k141_641331[full]   | 3636   | No  | NA | 0    | 0  | Low-quality    | Genome-fragment | 3.71  | 0     |
| S2-final-viral-combined_k141_641331[full]   | 1719   | No  | NA | 0    | 0  | Not-determined | Genome-fragment | NA    | 0     |
| S11_k141_54486                              | 3637   | No  | NA | 0    | 1  | Low-quality    | Genome-fragment | 8.75  | 0     |
| S1-final-viral-combined_k141_1746211[full]  | 3637   | No  | NA | 1    | 0  | Low-quality    | Genome-fragment | 7.88  | 0     |
| S2-final-viral-combined_k141_1774711[full]  | 3752   | No  | NA | 0    | 2  | Not-determined | Genome-fragment | NA    | 0     |
| S7-final-viral-combined_k141_161301[full]   | 3637   | No  | NA | 0    | 2  | Low-quality    | Genome-fragment | 7.55  | 0     |
| S2-final-viral-combined_k141_12051[full]    | 5426   | No  | NA | 0    | 1  | Not-determined | Genome-fragment | NA    | 0     |
| S4_k141_134429                              | 3637   | No  | NA | 0    | 1  | Low-quality    | Genome-fragment | 5.38  | 0     |
| S1-final-viral-combined_k141_1065841[full]  | 3638   | No  | NA | 4    | 0  | Low-quality    | Genome-fragment | NA    | 0     |
| S2-final-viral-combined_k141_1971771[full]  | 64386  | No  | NA | 5    | 1  | Medium-quality | Genome-fragment | 82.7  | 0     |
| S2-final-viral-combined_k141_1666681[full]  | 5336   | No  | NA | 0    | 5  | Not-determined | Genome-fragment | NA    | 0     |
| S2-final-viral-combined_k141_12221[full]    | 3909   | No  | NA | 0    | 0  | Not-determined | Genome-fragment | NA    | 0     |
| S2-final-viral-combined_k141_1775991[full]  | 1024   | No  | NA | 0    | 0  | Not-determined | Genome-fragment | NA    | 0     |
| S7-final-viral-combined_k141_1877131[full]  | 3638   | No  | NA | 2    | 0  | Low-quality    | Genome-fragment | 6.32  | 0     |
| S2-final-viral-combined_k141_12521[full]    | 6289   | No  | NA | 0    | 5  | Not-determined | Genome-fragment | NA    | 0     |
| S2-final-viral-combined_k141_1357221[full]  | 1502   | No  | NA | 0    | 1  | Not-determined | Genome-fragment | NA    | 0     |
| S2-final-viral-combined_k141_1357501[full]  | 4493   | No  | NA | 0    | 1  | Not-determined | Genome-fragment | NA    | 0     |
| S2-final-viral-combined_k141_737201[full]   | 3638   | No  | NA | 0    | 3  | Low-quality    | Genome-fragment | 6.25  | 0     |
| S2-final-viral-combined_k141_1255231[full]  | 2967   | No  | NA | 0    | 3  | Not-determined | Genome-fragment | NA    | 0     |
| S2-final-viral-combined_k141_1357551[full]  | 3640   | No  | NA | 0    | 2  | Not-determined | Genome-fragment | NA    | 0     |
| S2-final-viral-combined_k141_2292421[full]  | 1117   | No  | NA | 0    | 1  | Not-determined | Genome-fragment | NA    | 0     |
| S8_k141_257322                              | 3638   | No  | NA | 0    | 3  | Low-quality    | Genome-fragment | 9.29  | 0     |
| S9_k141_99376                               | 3639   | No  | NA | 3    | 0  | Low-quality    | Genome-fragment | 7.66  | 0     |
| S2-final-viral-combined_k141_630131[full]   | 1892   | No  | NA | 0    | 1  | Not-determined | Genome-fragment | NA    | 0     |
| S12_k141_101967                             | 3639   | Yes | NA | 2679 | 1  | Low-quality    | Genome-fragment | 4.91  | 26.38 |
| S2-final-viral-combined_k141_2292481[full]  | 2266   | No  | NA | 0    | 1  | Not-determined | Genome-fragment | NA    | 0     |
| S2_k141_214084                              | 3640   | No  | NA | 0    | 1  | Low-quality    | Genome-fragment | 5.19  | 0     |
| S2-final-viral-combined_k141_2082941[full]  | 1221   | No  | NA | 0    | 2  | Not-determined | Genome-fragment | NA    | 0     |
| S8_k141_26162                               | 3640   | No  | NA | 0    | 2  | Low-quality    | Genome-fragment | 3.42  | 0     |
| S9_k141_54932                               | 3641   | No  | NA | 0    | 1  | Low-quality    | Genome-fragment | 5.7   | 0     |
| S2-final-viral-combined_k141_2083181[full]  | 3701   | No  | NA | 0    | 2  | Not-determined | Genome-fragment | NA    | 0     |
| S2-final-viral-combined_k141_1976681[full]  | 3607   | No  | NA | 0    | 2  | Not-determined | Genome-fragment | NA    | 0     |
| S2-final-viral-combined_k141_2292941[full]  | 2757   | No  | NA | 0    | 3  | Not-determined | Genome-fragment | NA    | 0     |
| S1_k141_3811                                | 3641   | No  | NA | 0    | 0  | Low-quality    | Genome-fragment | 8.75  | 0     |
| S2-final-viral-combined_k141_1671191[full]  | 10786  | No  | NA | 0    | 4  | Not-determined | Genome-fragment | NA    | 0     |
| S17-final-viral-combined_k141_1245951[full] | 3641   | No  | NA | 0    | 1  | Low-quality    | Genome-fragment | 1.15  | 0     |
| S2-final-viral-combined_k141_434131[full]   | 35212  | No  | NA | 0    | 21 | Not-determined | Genome-fragment | NA    | 0     |
| S17-final-viral-combined_k141_58791[full]   | 3641   | No  | NA | 0    | 3  | Low-quality    | Genome-fragment | 4.04  | 0     |
| S2-final-viral-combined_k141_117411[full]   | 6210   | No  | NA | 0    | 1  | Not-determined | Genome-fragment | NA    | 0     |
| S2-final-viral-combined_k141_1501851[full]  | 3641   | No  | NA | 0    | 1  | Low-quality    | Genome-fragment | 2.02  | 0     |
| S2-final-viral-combined_k141_630351[full]   | 1659   | No  | NA | 0    | 0  | Not-determined | Genome-fragment | NA    | 0     |
| S9-final-viral-combined_k141_1155191[full]  | 3642   | No  | NA | 0    | 0  | Low-quality    | Genome-fragment | 4.38  | 0     |
| S2-final-viral-combined_k141_2444341[full]  | 1069   | No  | NA | 0    | 0  | Not-determined | Genome-fragment | NA    | 0     |
| S2-final-viral-combined_k141_2293151[full]  | 1279   | No  | NA | 0    | 2  | Not-determined | Genome-fragment | NA    | 0     |
| S2-final-viral-combined_k141_1174161[full]  | 3450   | No  | NA | 0    | 0  | Not-determined | Genome-fragment | NA    | 0     |
| S1_k141_391923                              | 3642   | Yes | NA | 2060 | 1  | Low-quality    | Genome-fragment | 5.3   | 48.44 |
| S2-final-viral-combined_k141_1048711[full]  | 6429   | No  | NA | 0    | 1  | Not-determined | Genome-fragment | NA    | 0     |
| S2-final-viral-combined_k141_944351[full]   | 1072   | No  | NA | 0    | 0  | Not-determined | Genome-fragment | NA    | 0     |
| S2-final-viral-combined_k141_1149611[full]  | 2498   | No  | NA | 0    | 0  | Not-determined | Genome-fragment | NA    | 0     |
| S2-final-viral-combined_k141_1976891[full]  | 1325   | No  | NA | 0    | 1  | Not-determined | Genome-fragment | NA    | 0     |
| S2-final-viral-combined_k141_1255731[full]  | 2571   | No  | NA | 0    | 2  | Not-determined | Genome-fragment | NA    | 0     |
| S2-final-viral-combined_k141_239411[full]   | 1978   | No  | NA | 0    | 1  | Not-determined | Genome-fragment | NA    | 0     |
| S2-final-viral-combined_k141_2083601[full]  | 11368  | No  | NA | 0    | 5  | Not-determined | Genome-fragment | NA    | 0</   |



|                                        |        |        |     |       |    |    |                |                 |                 |       |       |
|----------------------------------------|--------|--------|-----|-------|----|----|----------------|-----------------|-----------------|-------|-------|
| S2-final-viral-combined_k141_43533]]   | [full] | 1485   | No  | NA    | 0  | 0  | Not-determined | Genome-fragment | NA              | 0     | 0     |
| S2-final-viral-combined_k141_115057]]  | [full] | 3112   | No  | NA    | 0  | 0  | Not-determined | Genome-fragment | NA              | 0     | 0     |
| S2-final-viral-combined_k141_167373]]  | [full] | 1953   | No  | NA    | 0  | 2  | Not-determined | Genome-fragment | NA              | 0     | 0     |
| S2-final-viral-combined_k141_167374]]  | [full] | 1209   | No  | NA    | 0  | 1  | Not-determined | Genome-fragment | NA              | 0     | 0     |
| S2-final-viral-combined_k141_43548]]   | [full] | 1317   | No  | NA    | 0  | 1  | Not-determined | Genome-fragment | NA              | 0     | 0     |
| S12_k141_24898                         | [full] | 3649   | No  | NA    | 0  | 2  | Low-quality    | Genome-fragment | NA              | 19.98 | 0     |
| S2-final-viral-combined_k141_146573]]  | [full] | 1028   | No  | NA    | 0  | 1  | Not-determined | Genome-fragment | NA              | 0     | 0     |
| S2-final-viral-combined_k141_43564]]   | [full] | 2806   | No  | NA    | 0  | 3  | Not-determined | Genome-fragment | NA              | 0     | 0     |
| S2-final-viral-combined_k141_167401]]  | [full] | 4664   | No  | NA    | 0  | 1  | Not-determined | Genome-fragment | NA              | 0     | 0     |
| S2-final-viral-combined_k141_43568]]   | [full] | 1707   | No  | NA    | 0  | 1  | Not-determined | Genome-fragment | NA              | 0     | 0     |
| S2-final-viral-combined_k141_1393]]    | [full] | 6032   | No  | NA    | 0  | 4  | Not-determined | Genome-fragment | NA              | 0     | 0     |
| S2-final-viral-combined_k141_84390]]   | [full] | 1205   | No  | NA    | 0  | 0  | Not-determined | Genome-fragment | NA              | 0     | 0     |
| S2-final-viral-combined_k141_84393]]   | [full] | 1046   | No  | NA    | 0  | 0  | Not-determined | Genome-fragment | NA              | 0     | 0     |
| S2-final-viral-combined_k141_167408]]  | [full] | 2033   | No  | NA    | 0  | 2  | Not-determined | Genome-fragment | NA              | 0     | 0     |
| S2-final-viral-combined_k141_105003]]  | [full] | 1544   | No  | NA    | 0  | 0  | Not-determined | Genome-fragment | NA              | 0     | 0     |
| S2-final-viral-combined_k141_22311]]   | [full] | 1515   | No  | NA    | 0  | 3  | Not-determined | Genome-fragment | NA              | 0     | 0     |
| S2-final-viral-combined_k141_115092]]  | [full] | 2447   | No  | NA    | 0  | 2  | Not-determined | Genome-fragment | NA              | 0     | 0     |
| S2_k141_137512                         | [full] | 3649   | No  | NA    | 0  | 0  | Low-quality    | Genome-fragment | NA              | 1.59  | 0     |
| S2-final-viral-combined_k141_43501]]   | [full] | 1551   | No  | NA    | 0  | 2  | Not-determined | Genome-fragment | NA              | 0     | 0     |
| S4-final-viral-combined_k141_32761]]   | [full] | 3649   | Yes | 1160  | 1  | 3  | Low-quality    | Genome-fragment | NA              | 0.42  | 68.21 |
| S2-final-viral-combined_k141_197827]]  | [full] | 1569   | No  | NA    | 0  | 1  | Not-determined | Genome-fragment | NA              | 0     | 0     |
| S2-final-viral-combined_k141_2410]]    | [full] | 5126   | No  | NA    | 0  | 1  | Not-determined | Genome-fragment | NA              | 0     | 0     |
| S11-final-viral-combined_k141_328877]] | [full] | 3650   | No  | NA    | 0  | 2  | Low-quality    | Genome-fragment | NA              | 4.05  | 0     |
| S2-final-viral-combined_k141_94664]]   | [full] | 2679   | No  | NA    | 0  | 2  | Not-determined | Genome-fragment | NA              | 0     | 0     |
| S17-final-viral-combined_k141_156994]] | [full] | 3650   | No  | NA    | 1  | 0  | Low-quality    | Genome-fragment | NA              | 8.09  | 0     |
| S2-final-viral-combined_k141_187770]]  | [full] | 1850   | No  | NA    | 0  | 14 | Not-determined | Genome-fragment | NA              | 0     | 0     |
| S17-final-viral-combined_k141_13670]]  | [full] | 3651   | No  | NA    | 2  | 0  | Low-quality    | Genome-fragment | NA              | 3.86  | 0     |
| S2-final-viral-combined_k141_187775]]  | [full] | 2207   | No  | NA    | 0  | 0  | Not-determined | Genome-fragment | NA              | 0     | 0     |
| S2-final-viral-combined_k141_125583]]  | [full] | 8574   | No  | NA    | 0  | 0  | Not-determined | Genome-fragment | NA              | 0     | 0     |
| S2-final-viral-combined_k141_53044]]   | [full] | 1707   | No  | NA    | 0  | 2  | Not-determined | Genome-fragment | NA              | 0     | 0     |
| S2-final-viral-combined_k141_125678]]  | [full] | 2306   | No  | NA    | 0  | 0  | Not-determined | Genome-fragment | NA              | 0     | 0     |
| S2-final-viral-combined_k141_83390]]   | [full] | 2799   | No  | NA    | 0  | 1  | Not-determined | Genome-fragment | NA              | 0     | 0     |
| S17_k141_167586                        | [full] | 3651   | No  | NA    | 0  | 2  | Low-quality    | Genome-fragment | NA              | 0.96  | 0     |
| S2-final-viral-combined_k141_94685]]   | [full] | 3332   | No  | NA    | 0  | 1  | Not-determined | Genome-fragment | NA              | 0     | 0     |
| S1_k141_102346                         | [full] | 3652   | No  | NA    | 0  | 4  | Low-quality    | Genome-fragment | NA              | 7.27  | 0     |
| S2-final-viral-combined_k141_136002]]  | [full] | 1569   | No  | NA    | 0  | 0  | Not-determined | Genome-fragment | NA              | 0     | 0     |
| S2-final-viral-combined_k141_1449]]    | [full] | 5210   | No  | NA    | 0  | 2  | Not-determined | Genome-fragment | NA              | 0     | 0     |
| S2-final-viral-combined_k141_167514]]  | [full] | 1352   | No  | NA    | 0  | 1  | Not-determined | Genome-fragment | NA              | 0     | 0     |
| S2-final-viral-combined_k141_34686]]   | [full] | 1486   | No  | NA    | 0  | 2  | Not-determined | Genome-fragment | NA              | 0     | 0     |
| S2-final-viral-combined_k141_84498]]   | [full] | 4480   | No  | NA    | 0  | 1  | Not-determined | Genome-fragment | NA              | 0     | 0     |
| S2-final-viral-combined_k141_84508]]   | [full] | 1121   | No  | NA    | 0  | 1  | Not-determined | Genome-fragment | NA              | 0     | 0     |
| S2-final-viral-combined_k141_156717]]  | [full] | 1271   | No  | NA    | 0  | 0  | Not-determined | Genome-fragment | NA              | 0     | 0     |
| S2-final-viral-combined_k141_214863]]  | [full] | 3652   | No  | NA    | 1  | 0  | Low-quality    | Genome-fragment | NA              | 7.61  | 0     |
| S2_k141_98810                          | [full] | 3652   | No  | NA    | 2  | 0  | Low-quality    | Genome-fragment | NA              | 8.09  | 0     |
| S2-final-viral-combined_k141_20859]]   | [full] | 68162  | No  | NA    | 2  | 36 | Medium-quality | Genome-fragment | NA              | 88.92 | 0     |
| S2-final-viral-combined_k141_208583]]  | [full] | 2605   | No  | NA    | 0  | 2  | Not-determined | Genome-fragment | NA              | 0     | 0     |
| S2-final-viral-combined_k141_239502]]  | [full] | 5118   | No  | NA    | 0  | 3  | Not-determined | Genome-fragment | NA              | 0     | 0     |
| S6-final-viral-combined_k141_43423]]   | [full] | 3652   | No  | NA    | 1  | 0  | Low-quality    | Genome-fragment | NA              | 7.42  | 0     |
| S2-final-viral-combined_k141_115247]]  | [full] | 3721   | No  | NA    | 0  | 2  | Not-determined | Genome-fragment | NA              | 0     | 0     |
| S7-final-viral-combined_k141_10340]]   | [full] | 3653   | No  | NA    | 0  | 0  | Low-quality    | Genome-fragment | NA              | 8.68  | 0     |
| S2-final-viral-combined_k141_53171]]   | [full] | 10462  | No  | NA    | 0  | 7  | Not-determined | Genome-fragment | NA              | 0     | 0     |
| S2-final-viral-combined_k141_11959]]   | [full] | 9902   | No  | NA    | 0  | 8  | Not-determined | Genome-fragment | NA              | 0     | 0     |
| S2-final-viral-combined_k141_187909]]  | [full] | 3262   | No  | NA    | 0  | 0  | Not-determined | Genome-fragment | NA              | 0     | 0     |
| S2-final-viral-combined_k141_86561]]   | [full] | 3654   | No  | NA    | 0  | 3  | Low-quality    | Genome-fragment | NA              | 2.07  | 0     |
| S2-final-viral-combined_k141_146713]]  | [full] | 4895   | No  | NA    | 0  | 2  | Not-determined | Genome-fragment | NA              | 0     | 0     |
| S9_k141_68040                          | [full] | 3655   | No  | NA    | 0  | 1  | Low-quality    | Genome-fragment | NA              | 2.47  | 0     |
| S2-final-viral-combined_k141_12003]]   | [full] | 1031   | No  | NA    | 0  | 1  | Not-determined | Genome-fragment | NA              | 0     | 0     |
| S2-final-viral-combined_k141_1465]]    | [full] | 3428   | No  | NA    | 0  | 2  | Not-determined | Genome-fragment | NA              | 0     | 0     |
| S2-final-viral-combined_k141_105064]]  | [full] | 10608  | No  | NA    | 0  | 6  | Not-determined | Genome-fragment | NA              | 0     | 0     |
| S2-final-viral-combined_k141_53216]]   | [full] | 7057   | No  | NA    | 0  | 3  | Not-determined | Genome-fragment | NA              | 0     | 0     |
| S6_k141_28884                          | [full] | 3655   | No  | NA    | 0  | 1  | Low-quality    | Genome-fragment | NA              | 3.33  | 0     |
| S2-final-viral-combined_k141_177885]]  | [full] | 1463   | No  | NA    | 0  | 0  | Not-determined | Genome-fragment | NA              | 0     | 0     |
| S8-final-viral-combined_k141_34380]]   | [full] | 3655   | No  | NA    | 0  | 0  | Low-quality    | Genome-fragment | NA              | 2.99  | 0     |
| S2-final-viral-combined_k141_105093]]  | [full] | 1191   | No  | NA    | 0  | 0  | Not-determined | Genome-fragment | NA              | 0     | 0     |
| S2-final-viral-combined_k141_197904]]  | [full] | 1062   | No  | NA    | 0  | 0  | Not-determined | Genome-fragment | NA              | 0     | 0     |
| S2-final-viral-combined_k141_115255]]  | [full] | 1921   | No  | NA    | 0  | 0  | Not-determined | Genome-fragment | NA              | 0     | 0     |
| S2-final-viral-combined_k141_63487]]   | [full] | 3712   | No  | NA    | 0  | 0  | Not-determined | Genome-fragment | NA              | 0     | 0     |
| S9_k141_31754                          | [full] | 3656   | No  | NA    | 0  | 0  | Low-quality    | Genome-fragment | NA              | 3.96  | 0     |
| S2-final-viral-combined_k141_229529]]  | [full] | 11348  | Yes | 59461 | 14 | 30 | Complete       | High-quality    | Genome-fragment | 100   | 47.49 |
| S2-final-viral-combined_k141_94788]]   | [full] | 5179   | No  | NA    | 0  | 4  | Not-determined | Genome-fragment | NA              | 0     | 0     |
| S1-final-viral-combined_k141_262514]]  | [full] | 3656   | No  | NA    | 0  | 3  | Low-quality    | Genome-fragment | NA              | 1     | 0     |
| S2-final-viral-combined_k141_43767]]   | [full] | 3108   | No  | NA    | 0  | 0  | Not-determined | Genome-fragment | NA              | 0     | 0     |
| S12_k141_252735                        | [full] | 3656   | No  | NA    | 0  | 0  | Low-quality    | Genome-fragment | NA              | 4.27  | 0     |
| S2-final-viral-combined_k141_146761]]  | [full] | 1782   | No  | NA    | 0  | 1  | Not-determined | Genome-fragment | NA              | 0     | 0     |
| S2-final-viral-combined_k141_1514]]    | [full] | 4867   | No  | NA    | 0  | 0  | Not-determined | Genome-fragment | NA              | 0     | 0     |
| S2-final-viral-combined_k141_177911]]  | [full] | 1224   | No  | NA    | 0  | 0  | Not-determined | Genome-fragment | NA              | 0     | 0     |
| S2-final-viral-combined_k141_162064]]  | [full] | 3656   | No  | NA    | 0  | 0  | Low-quality    | Genome-fragment | NA              | 6.75  | 0     |
| S2-final-viral-combined_k141_177940]]  | [full] | 2713   | No  | NA    | 0  | 1  | Not-determined | Genome-fragment | NA              | 0     | 0     |
| S4_k141_145917                         | [full] | 3656   | No  | NA    | 3  | 0  | Low-quality    | Genome-fragment | NA              | 9.83  | 0     |
| S2-final-viral-combined_k141_239621]]  | [full] | 2446   | No  | NA    | 0  | 1  | Not-determined | Genome-fragment | NA              | 0     | 0     |
| S2-final-viral-combined_k141_247242]]  | [full] | 3657   | No  | NA    | 0  | 0  | Low-quality    | Genome-fragment | NA              | 6.25  | 0     |
| S2-final-viral-combined_k141_12029]]   | [full] | 7841   | No  | NA    | 0  | 6  | Not-determined | Genome-fragment | NA              | 0     | 0     |
| S2-final-viral-combined_k141_43822]]   | [full] | 1564   | No  | NA    | 0  | 1  | Not-determined | Genome-fragment | NA              | 0     | 0     |
| S6-final-viral-combined_k141_133390]]  | [full] | 3658   | No  | NA    | 0  | 1  | Low-quality    | Genome-fragment | NA              | 3.21  | 0     |
| S2-final-viral-combined_k141_156851]]  | [full] | 3271   | No  | NA    | 0  | 0  | Not-determined | Genome-fragment | NA              | 0     | 0     |
| S2-final-viral-combined_k141_156853]]  | [full] | 4308   | No  | NA    | 0  | 1  | Not-determined | Genome-fragment | NA              | 0     | 0     |
| S2-final-viral-combined_k141_125828]]  | [full] | 2342   | No  | NA    | 0  | 0  | Not-determined | Genome-fragment | NA              | 0     | 0     |
| S8_k141_229254                         | [full] | 3658   | No  | NA    | 0  | 0  | Low-quality    | Genome-fragment | NA              | 4.33  | 0     |
| S2-final-viral-combined_k141_177981]]  | [full] | 3657   | No  | NA    | 0  | 1  | Not-determined | Genome-fragment | NA              | 0     | 0     |
| S2-final-viral-combined_k141_115352]]  | [full] | 3640   | No  | NA    | 0  | 0  | Medium-quality | Genome-fragment | NA              | 82.92 | 0     |
| S1-final-viral-combined_k141_205552]]  | [full] | 3659   | No  | NA    | 0  | 2  | Low-quality    | Genome-fragment | NA              | 4.35  | 0     |
| S12-final-viral-combined_k141_145780]] | [full] | 3659   | No  | NA    | 0  | 1  | Low-quality    | Genome-fragment | NA              | 3.88  | 0     |
| S2-final-viral-combined_k141_23509]]   | [full] | 5140   | No  | NA    | 0  | 5  | Not-determined | Genome-fragment | NA              | 0     | 0     |
| S2-final-viral-combined_k141_22437]]   | [full] | 2461   | No  | NA    | 0  | 0  | Not-determined | Genome-fragment | NA              | 0     | 0     |
| S2_k141_109142                         | [full] | 3659   | No  | NA    | 0  | 0  | Low-quality    | Genome-fragment | NA              | 4.29  | 0     |
| S11_k141_101516                        | [full] | 3660   | No  | NA    | 0  | 1  | Low-quality    | Genome-fragment | NA              | 9.06  | 0     |
| S17-final-viral-combined_k141_120914]] | [full] | 3660   | No  | NA    | 2  | 0  | Low-quality    | Genome-fragment | NA              | 10.2  | 0     |
| S2-final-viral-combined_k141_126886]]  | [full] | 6718   | No  | NA    | 0  | 2  | Not-determined | Genome-fragment | NA              | 0     | 0     |
| S11-final-viral-combined_k141_197402]] | [full] | 3661   | No  | NA    | 0  | 2  | Low-quality    | Genome-fragment | NA              | 8.18  | 0     |
| S2-final-viral-combined_k141_1555]]    | [full] | 4036   | No  | NA    | 0  | 0  | Not-determined | Genome-fragment | NA              | 0     | 0     |
| S2-final-viral-combined_k141_125901]]  | [full] | 1879   | No  | NA    | 0  | 2  | Not-determined | Genome-fragment | NA              | 0     | 0     |
| S2-final-viral-combined_k141_105170]]  | [full] | 1108   | No  | NA    | 0  | 1  | Not-determined | Genome-fragment | NA              | 0     | 0     |
| S17-final-viral-combined_k141_179292]] | [full] | 3661   | No  | NA    | 5  | 0  | Low-quality    | Genome-fragment | NA              | 9.86  | 0     |
| S2-final-viral-combined_k141_84608]]   | [full] | 129176 | Yes | 44483 | 20 | 31 | Medium-quality | Genome-fragment | NA              | 78.65 | 65.56 |
| S2-final-viral-combined_k141_1574]]    | [full] | 5785   | No  | NA    | 0  | 3  | Not-determined | Genome-fragment | NA              | 0     | 0     |
| S2-final-viral-combined_k141_32597]]   | [full] | 11770  | No  | NA    | 0  | 5  | Not-determined | Genome-fragment | NA              | 0     | 0     |
| S2-final-viral-combined_k141_94877]]   | [full] | 1063   | No  | NA    | 0  | 2  | Not-determined | Genome-fragment | NA              | 0     | 0     |
| S2-final-viral-combined_k141_43953]]   | [full] | 8763   | No  | NA    | 0  | 0  | Not-determined | Genome-fragment | NA              | 0     | 0     |
| S17_k141_46138                         | [full] | 3661   | No  | NA    | 0  | 0  | Low-quality    | Genome-fragment | NA              | 6.95  | 0     |
| S4_k141_43879                          | [full] | 3661   | No  | NA    | 0  | 0  | Low-quality    | Genome-fragment | NA              | 6.6   | 0     |
| S8_k141_174045                         | [full] | 3661   | No  | NA    | 1  | 0  | Low-quality    | Genome-fragment | NA              | 8.11  | 0     |
| S2-final-viral-combined_k141_236200]]  | [full] | 14453  | No  | NA    | 0  | 10 | Not-determined | Genome-fragment | NA              | 0     | 0     |
| S11-final-viral-combined_k141_230617]] | [full] | 3662   | No  | NA    | 4  | 0  | Low-quality    | Genome-fragment | NA              | 6.39  | 0     |
| S2-final-viral-combined_k141_125947]]  | [full] | 2157   | No  | NA    | 0  | 1  | Not-determined | Genome-fragment | NA              | 4.57  | 0     |
| S2-final-viral-combined_k141_208723]]  | [full] | 3662   | No  | NA    | 0  | 2  | Low-quality    | Genome-fragment | NA              | 0     | 0     |
| S2-final-viral-combined_k141_218969]]  | [full] | 2885   | No  | NA    | 0  | 0  | Not-determined | Genome-fragment | NA              | 0     | 0     |
| S2-final-viral-combined_k141_188592]]  | [full] | 3662   | No  | NA    | 0  | 0  | Low-quality    | Genome-fragment | NA              | 7.88  | 0     |
| S2-final-viral-combined_k141_125940]]  | [full] | 5281   | No  | NA    | 0  | 0  | Not-determined | Genome-fragment | NA              | 0     | 0     |
| S4-final-viral-combined_k141_127515]]  | [full] | 3662   | No  | NA    | 1  | 0  | Low-quality    | Genome-fragment | NA              | 7.51  | 0     |
| S2-final-viral-combined_k141_136283]]  | [full] | 4846   | No  | NA    | 0  | 1  | Not-determined | Genome-fragment | NA              | 0     | 0     |
| S2-final-viral-combined_k141_105215]]  | [full] | 2953   | No  | NA    | 0  | 0  | Not-determined | Genome-fragment | NA              | 0     | 0     |
| S8-final-viral-combined_k141_35168]]   | [full] | 3662   | No  |       |    |    |                |                 |                 |       |       |



|                                      |        |       |     |       |    |    |                |                 |    |       |
|--------------------------------------|--------|-------|-----|-------|----|----|----------------|-----------------|----|-------|
| S2-final-viral-combined_k141_847231  | [full] | 2690  | No  | NA    | 0  | 2  | Not-determined | Genome-fragment | NA | 0     |
| S2-final-viral-combined_k141_847232  | [full] | 3309  | No  | NA    | 0  | 0  | Not-determined | Genome-fragment | NA | 0     |
| S2-final-viral-combined_k141_106686  | [full] | 3678  | No  | NA    | 2  | 0  | Low-quality    | Genome-fragment | NA | 6.7   |
| S2-final-viral-combined_k141_115577  | [full] | 1020  | No  | NA    | 0  | 0  | Not-determined | Genome-fragment | NA | 0     |
| S2-final-viral-combined_k141_126044  | [full] | 1885  | No  | NA    | 0  | 9  | Not-determined | Genome-fragment | NA | 0     |
| S2-final-viral-combined_k141_198109  | [full] | 1799  | No  | NA    | 0  | 1  | Not-determined | Genome-fragment | NA | 0     |
| S4-final-viral-combined_k141_42159   | [full] | 3678  | No  | NA    | 0  | 3  | Low-quality    | Genome-fragment | NA | 2.42  |
| S8-final-viral-combined_k141_197875  | [full] | 3678  | No  | NA    | 1  | 0  | Low-quality    | Genome-fragment | NA | 3.96  |
| S9-final-viral-combined_k141_124946  | [full] | 3679  | No  | NA    | 1  | 1  | Low-quality    | Genome-fragment | NA | 1.15  |
| S2-final-viral-combined_k141_115606  | [full] | 6815  | No  | NA    | 0  | 3  | Not-determined | Genome-fragment | NA | 0     |
| S8-final-viral-combined_k141_102600  | [full] | 3679  | No  | NA    | 2  | 0  | Low-quality    | Genome-fragment | NA | 8.71  |
| S2-final-viral-combined_k141_126071  | [full] | 1803  | No  | NA    | 0  | 2  | Not-determined | Genome-fragment | NA | 0     |
| S2-final-viral-combined_k141_74183   | [full] | 1901  | No  | NA    | 0  | 0  | Not-determined | Genome-fragment | NA | 0     |
| S2-final-viral-combined_k141_115627  | [full] | 1598  | No  | NA    | 0  | 0  | Not-determined | Genome-fragment | NA | 0     |
| S2-final-viral-combined_k141_74189   | [full] | 1321  | No  | NA    | 0  | 0  | Not-determined | Genome-fragment | NA | 0     |
| S4-final-viral-combined_k141_116153  | [full] | 3680  | No  | NA    | 1  | 0  | Low-quality    | Genome-fragment | NA | 1.93  |
| S2-final-viral-combined_k141_53511   | [full] | 2219  | No  | NA    | 0  | 1  | Not-determined | Genome-fragment | NA | 0     |
| S8_k141_32178                        | [full] | 3680  | No  | NA    | 3  | 0  | Low-quality    | Genome-fragment | NA | 5.96  |
| S2-final-viral-combined_k141_198142  | [full] | 3409  | No  | NA    | 0  | 0  | Not-determined | Genome-fragment | NA | 0     |
| S4-final-viral-combined_k141_46987   | [full] | 3681  | No  | NA    | 0  | 3  | Low-quality    | Genome-fragment | NA | 4.43  |
| S2-final-viral-combined_k141_178339  | [full] | 4134  | No  | NA    | 0  | 0  | Not-determined | Genome-fragment | NA | 0     |
| S5-final-viral-combined_k141_106460  | [full] | 3683  | No  | NA    | 0  | 0  | Low-quality    | Genome-fragment | NA | 9.4   |
| S2-final-viral-combined_k141_167879  | [full] | 1274  | No  | NA    | 0  | 1  | Not-determined | Genome-fragment | NA | 0     |
| S2-final-viral-combined_k141_105472  | [full] | 2072  | No  | NA    | 0  | 1  | Not-determined | Genome-fragment | NA | 0     |
| S5-final-viral-combined_k141_134138  | [full] | 3683  | No  | NA    | 0  | 4  | Low-quality    | Genome-fragment | NA | 1.54  |
| S5-final-viral-combined_k141_201369  | [full] | 3683  | No  | NA    | 2  | 0  | Low-quality    | Genome-fragment | NA | 6.23  |
| S2-final-viral-combined_k141_22693   | [full] | 2490  | No  | NA    | 0  | 0  | Not-determined | Genome-fragment | NA | 0     |
| S2-final-viral-combined_k141_208826  | [full] | 5746  | No  | NA    | 0  | 3  | Not-determined | Genome-fragment | NA | 0     |
| S2_k141_137952                       | [full] | 3683  | No  | NA    | 2  | 0  | Low-quality    | Genome-fragment | NA | 7.41  |
| S2-final-viral-combined_k141_198179  | [full] | 1125  | No  | NA    | 0  | 1  | Not-determined | Genome-fragment | NA | 0     |
| S6_k141_36056                        | [full] | 3683  | No  | NA    | 1  | 0  | Low-quality    | Genome-fragment | NA | 3.61  |
| S9-final-viral-combined_k141_93726   | [full] | 3684  | No  | NA    | 0  | 0  | Low-quality    | Genome-fragment | NA | 2.72  |
| S11_k141_204587                      | [full] | 3684  | No  | NA    | 3  | 0  | Low-quality    | Genome-fragment | NA | 12.99 |
| S3_k141_100561                       | [full] | 3684  | No  | NA    | 0  | 2  | Low-quality    | Genome-fragment | NA | 1.5   |
| S2-final-viral-combined_k141_63865   | [full] | 2924  | No  | NA    | 0  | 2  | Not-determined | Genome-fragment | NA | 0     |
| S2-final-viral-combined_k141_74276   | [full] | 3687  | No  | NA    | 0  | 1  | Not-determined | Genome-fragment | NA | 0     |
| S12_k141_145030                      | [full] | 3686  | No  | NA    | 0  | 0  | Low-quality    | Genome-fragment | NA | 3.62  |
| S1-final-viral-combined_k141_185011  | [full] | 3687  | No  | NA    | 0  | 4  | Low-quality    | Genome-fragment | NA | 4.94  |
| S2-final-viral-combined_k141_178181  | [full] | 13819 | No  | NA    | 0  | 3  | Not-determined | Genome-fragment | NA | 0     |
| S2-final-viral-combined_k141_128367  | [full] | 3687  | No  | NA    | 0  | 3  | Low-quality    | Genome-fragment | NA | 2.48  |
| S2-final-viral-combined_k141_219102  | [full] | 5166  | No  | NA    | 0  | 2  | Not-determined | Genome-fragment | NA | 0     |
| S2-final-viral-combined_k141_126134  | [full] | 19616 | No  | NA    | 9  | 1  | Medium-quality | Genome-fragment | NA | 52.51 |
| S4_k141_133165                       | [full] | 3687  | No  | NA    | 0  | 1  | Low-quality    | Genome-fragment | NA | 2.35  |
| S6-final-viral-combined_k141_99514   | [full] | 3687  | No  | NA    | 0  | 0  | Low-quality    | Genome-fragment | NA | 5.81  |
| S2-final-viral-combined_k141_23612   | [full] | 1802  | No  | NA    | 0  | 1  | Not-determined | Genome-fragment | NA | 0     |
| S2-final-viral-combined_k141_14863   | [full] | 2249  | No  | NA    | 0  | 1  | Not-determined | Genome-fragment | NA | 0     |
| S2-final-viral-combined_k141_13648   | [full] | 1490  | No  | NA    | 0  | 0  | Not-determined | Genome-fragment | NA | 0     |
| S2-final-viral-combined_k141_146901  | [full] | 1313  | No  | NA    | 0  | 2  | Not-determined | Genome-fragment | NA | 0     |
| S2_k141_65649                        | [full] | 3688  | No  | NA    | 0  | 0  | Low-quality    | Genome-fragment | NA | 5.66  |
| S2-final-viral-combined_k141_239953  | [full] | 1443  | No  | NA    | 0  | 0  | Not-determined | Genome-fragment | NA | 0     |
| S2-final-viral-combined_k141_157159  | [full] | 2653  | No  | NA    | 0  | 0  | Not-determined | Genome-fragment | NA | 0     |
| S2-final-viral-combined_k141_22758   | [full] | 2558  | No  | NA    | 0  | 2  | Not-determined | Genome-fragment | NA | 0     |
| S7_k141_55211                        | [full] | 3688  | No  | NA    | 0  | 1  | Low-quality    | Genome-fragment | NA | 7.42  |
| S17-final-viral-combined_k141_75971  | [full] | 3688  | No  | NA    | 0  | 1  | Low-quality    | Genome-fragment | NA | 7.13  |
| S11-final-viral-combined_k141_142327 | [full] | 3689  | No  | NA    | 0  | 1  | Low-quality    | Genome-fragment | NA | 8.17  |
| S2-final-viral-combined_k141_12763   | [full] | 7234  | No  | NA    | 0  | 0  | Not-determined | Genome-fragment | NA | 0     |
| S12-final-viral-combined_k141_306574 | [full] | 3689  | No  | NA    | 3  | 0  | Low-quality    | Genome-fragment | NA | 8.78  |
| S12-final-viral-combined_k141_90565  | [full] | 3689  | No  | NA    | 0  | 1  | Low-quality    | Genome-fragment | NA | 3.69  |
| S2-final-viral-combined_k141_126210  | [full] | 1361  | No  | NA    | 0  | 0  | Not-determined | Genome-fragment | NA | 0     |
| S2-final-viral-combined_k141_44385   | [full] | 2241  | No  | NA    | 0  | 3  | Not-determined | Genome-fragment | NA | 0     |
| S12-final-viral-combined_k141_22449  | [full] | 3689  | No  | NA    | 0  | 1  | Low-quality    | Genome-fragment | NA | 1.91  |
| S2-final-viral-combined_k141_53726   | [full] | 1703  | No  | NA    | 0  | 0  | Not-determined | Genome-fragment | NA | 0     |
| S2-final-viral-combined_k141_178447  | [full] | 2096  | No  | NA    | 0  | 1  | Not-determined | Genome-fragment | NA | 0     |
| S4-final-viral-combined_k141_4295    | [full] | 3689  | No  | NA    | 0  | 1  | Low-quality    | Genome-fragment | NA | 5.24  |
| S2-final-viral-combined_k141_133374  | [full] | 3691  | No  | NA    | 0  | 0  | Low-quality    | Genome-fragment | NA | 3.86  |
| S17_k141_60244                       | [full] | 3692  | No  | NA    | 0  | 1  | Low-quality    | Genome-fragment | NA | 7.22  |
| S2-final-viral-combined_k141_188317  | [full] | 3926  | No  | NA    | 0  | 4  | Not-determined | Genome-fragment | NA | 0     |
| S2-final-viral-combined_k141_2029    | [full] | 3189  | No  | NA    | 0  | 18 | Not-determined | Genome-fragment | NA | 0     |
| S2-final-viral-combined_k141_170154  | [full] | 3692  | No  | NA    | 0  | 1  | Low-quality    | Genome-fragment | NA | 1.85  |
| S2-final-viral-combined_k141_16021   | [full] | 5175  | No  | NA    | 0  | 4  | Not-determined | Genome-fragment | NA | 0     |
| S2-final-viral-combined_k141_146042  | [full] | 5784  | No  | NA    | 0  | 3  | Not-determined | Genome-fragment | NA | 0     |
| S11-final-viral-combined_k141_210912 | [full] | 3693  | No  | NA    | 0  | 0  | Low-quality    | Genome-fragment | NA | 8.8   |
| S2-final-viral-combined_k141_44488   | [full] | 1318  | No  | NA    | 0  | 1  | Not-determined | Genome-fragment | NA | 0     |
| S11-final-viral-combined_k141_13162  | [full] | 3693  | No  | NA    | 1  | 0  | Low-quality    | Genome-fragment | NA | 6.13  |
| S17_k141_76814                       | [full] | 3693  | No  | NA    | 1  | 0  | Low-quality    | Genome-fragment | NA | 9.33  |
| S2-final-viral-combined_k141_84969   | [full] | 6635  | No  | NA    | 0  | 3  | Not-determined | Genome-fragment | NA | 0     |
| S2-final-viral-combined_k141_188360  | [full] | 1662  | No  | NA    | 0  | 2  | Not-determined | Genome-fragment | NA | 0     |
| S2-final-viral-combined_k141_53804   | [full] | 2888  | No  | NA    | 0  | 2  | Not-determined | Genome-fragment | NA | 0     |
| S2-final-viral-combined_k141_74387   | [full] | 60095 | Yes | 37755 | 20 | 16 | Complete       | Genome-fragment | NA | 100   |
| S2-final-viral-combined_k141_105689  | [full] | 3376  | No  | NA    | 0  | 1  | Not-determined | Genome-fragment | NA | 0     |
| S2-final-viral-combined_k141_105689  | [full] | 1271  | No  | NA    | 0  | 3  | Not-determined | Genome-fragment | NA | 0     |
| S2-final-viral-combined_k141_32777   | [full] | 2862  | No  | NA    | 0  | 0  | Not-determined | Genome-fragment | NA | 0     |
| S6-final-viral-combined_k141_102573  | [full] | 3693  | No  | NA    | 0  | 1  | Low-quality    | Genome-fragment | NA | 1.29  |
| S2-final-viral-combined_k141_167926  | [full] | 1683  | No  | NA    | 0  | 1  | Not-determined | Genome-fragment | NA | 0     |
| S2-final-viral-combined_k141_198264  | [full] | 2060  | No  | NA    | 0  | 2  | Not-determined | Genome-fragment | NA | 0     |
| S8_k141_58020                        | [full] | 3693  | No  | NA    | 0  | 3  | Low-quality    | Genome-fragment | NA | 3.9   |
| S1-final-viral-combined_k141_282339  | [full] | 3694  | No  | NA    | 0  | 0  | Low-quality    | Genome-fragment | NA | 8.96  |
| S2-final-viral-combined_k141_2387    | [full] | 3694  | No  | NA    | 2  | 0  | Low-quality    | Genome-fragment | NA | 9.28  |
| S2-final-viral-combined_k141_162591  | [full] | 3797  | No  | NA    | 1  | 0  | Not-determined | Genome-fragment | NA | 0     |
| S4-final-viral-combined_k141_58293   | [full] | 3694  | No  | NA    | 0  | 3  | Low-quality    | Genome-fragment | NA | 1.77  |
| S2-final-viral-combined_k141_22839   | [full] | 7345  | No  | NA    | 0  | 3  | Not-determined | Genome-fragment | NA | 0     |
| S11-final-viral-combined_k141_157191 | [full] | 2901  | No  | NA    | 0  | 0  | Not-determined | Genome-fragment | NA | 0     |
| S2-final-viral-combined_k141_136795  | [full] | 6399  | No  | NA    | 0  | 4  | Not-determined | Genome-fragment | NA | 0     |
| S2-final-viral-combined_k141_85059   | [full] | 2127  | No  | NA    | 0  | 2  | Not-determined | Genome-fragment | NA | 0     |
| S1-final-viral-combined_k141_148645  | [full] | 3695  | No  | NA    | 0  | 0  | Low-quality    | Genome-fragment | NA | 10    |
| S2-final-viral-combined_k141_22869   | [full] | 3095  | No  | NA    | 0  | 2  | Not-determined | Genome-fragment | NA | 0     |
| S5_k141_36894                        | [full] | 3695  | No  | NA    | 2  | 0  | Low-quality    | Genome-fragment | NA | 6.76  |
| S2-final-viral-combined_k141_105771  | [full] | 2155  | No  | NA    | 0  | 0  | Not-determined | Genome-fragment | NA | 0     |
| S2-final-viral-combined_k141_178546  | [full] | 3004  | No  | NA    | 0  | 0  | Not-determined | Genome-fragment | NA | 0     |
| S2-final-viral-combined_k141_105775  | [full] | 1617  | No  | NA    | 0  | 0  | Not-determined | Genome-fragment | NA | 0     |
| S2-final-viral-combined_k141_230135  | [full] | 5317  | No  | NA    | 0  | 0  | Not-determined | Genome-fragment | NA | 0     |
| S1-final-viral-combined_k141_148651  | [full] | 3696  | No  | NA    | 0  | 1  | Low-quality    | Genome-fragment | NA | 9.18  |
| S2-final-viral-combined_k141_64152   | [full] | 2751  | No  | NA    | 0  | 3  | Not-determined | Genome-fragment | NA | 0     |
| S2-final-viral-combined_k141_95330   | [full] | 1619  | No  | NA    | 0  | 1  | Not-determined | Genome-fragment | NA | 0     |
| S2-final-viral-combined_k141_146948  | [full] | 1375  | No  | NA    | 0  | 0  | Not-determined | Genome-fragment | NA | 0     |
| S1_k141_278753                       | [full] | 3696  | No  | NA    | 4  | 0  | Low-quality    | Genome-fragment | NA | 6.36  |
| S7-final-viral-combined_k141_147833  | [full] | 3697  | No  | NA    | 0  | 4  | Low-quality    | Genome-fragment | NA | 2.48  |
| S12_k141_223525                      | [full] | 3697  | No  | NA    | 1  | 0  | Low-quality    | Genome-fragment | NA | 3.83  |
| S8_k141_138221                       | [full] | 3697  | No  | NA    | 0  | 0  | Low-quality    | Genome-fragment | NA | 3.44  |
| S2-final-viral-combined_k141_95357   | [full] | 1811  | No  | NA    | 0  | 2  | Not-determined | Genome-fragment | NA | 0     |
| S2-final-viral-combined_k141_230197  | [full] | 2183  | No  | NA    | 0  | 2  | Not-determined | Genome-fragment | NA | 0     |
| S11-final-viral-combined_k141_227885 | [full] | 3699  | No  | NA    | 0  | 0  | Low-quality    | Genome-fragment | NA | 7.57  |
| S2-final-viral-combined_k141_136860  | [full] | 9800  | No  | NA    | 0  | 2  | Not-determined | Genome-fragment | NA | 0     |
| S1-final-viral-combined_k141_375368  | [full] | 3699  | No  | NA    | 0  | 2  | Low-quality    | Genome-fragment | NA | 2.71  |
| S2-final-viral-combined_k141_95378   | [full] | 4121  | No  | NA    | 0  | 0  | Not-determined | Genome-fragment | NA | 0     |
| S17_k141_163430                      | [full] | 3699  | No  | NA    | 0  | 4  | Low-quality    | Genome-fragment | NA | 1.24  |
| S2-final-viral-combined_k141_240154  | [full] | 2009  | No  | NA    | 0  | 0  | Not-determined | Genome-fragment | NA | 0     |
| S2-final-viral-combined_k141_44570   | [full] | 2714  | No  | NA    | 0  | 1  | Not-determined | Genome-fragment | NA | 0     |
| S2-final-viral-combined_k141_240161  | [full] | 6015  | No  | NA    | 0  | 0  | Not-determined | Genome-fragment | NA | 0     |
| S4_k141_113591                       | [full] | 3699  | No  | NA    | 1  | 0  | Low-quality    | Genome-fragment | NA | 3.57  |
| S2-final-viral-combined_k141_230263  | [full] | 1117  | No  | NA    | 0  | 1  | Not-determined | Genome-fragment | NA | 0     |
| S2-final-viral-combined_k141_188458  | [full] | 3150  | No  | NA    | 0  | 2  | Not-determined | Genome-fragment | NA | 0     |
| S2-final-viral-combined_k141_157411  | [full] | 1233  | No  | NA    | 0  | 0  | Not-determined | Genome-fragment | NA | 0     |
| S1-final-viral-combined_k141_85425   | [full] | 3700  | No  | NA    | 0  | 5  | Low-quality    | Genome-fragment | NA | 2.88  |
| S2-final-viral-combined_k141_123131  | [full] | 5691  | No  | NA    | 0  | 4  | Not-determined | Genome-fragment | NA | 0     |
| S2-final-viral-combined_k141_230270  | [full] | 3175  | No  | NA    | 0  | 0  | Not-determined | Genome-fragment | NA | 0     |
| S2-final-viral-combined_k141_157422  | [full] | 1629  | No  | NA    | 0  | 1  | Not-determined | Genome-fragment | NA | 0     |
| S2-final-viral-combined_k141_64241   | [full] | 1769  | No  | NA    | 0  | 0  | Not-determined | Genome-fragment | NA | 0     |
| S9-final-viral-combined_k141_20029   | [full] | 3701  | No  | NA    | 0  | 0  | Low-quality    | Genome-fragment | NA | 2.37  |
| S2-final-viral-combined_k141_230282  | [full] | 3813  | No  | NA    | 1  | 0  | Medium-quality | Genome-fragment | NA | 85.27 |
| S12-final-viral-combined_k141_216588 | [full] |       |     |       |    |    |                |                 |    |       |



|                                      |        |     |       |    |             |                 |                 |       |       |
|--------------------------------------|--------|-----|-------|----|-------------|-----------------|-----------------|-------|-------|
| 512_k141_218707                      | 3707   | No  | NA    | 0  | 0           | Low-quality     | Genome-fragment | 9.22  | 0     |
| 57-final-viral-combined_k141_1665    | 3708   | No  | NA    | 0  | 1           | Low-quality     | Genome-fragment | 5.04  | 0     |
| 517-final-viral-combined_k141_44142  | 3708   | No  | NA    | 4  | 0           | Low-quality     | Genome-fragment | 9.77  | 0     |
| 52-final-viral-combined_k141_240261  | 2149   | No  | NA    | 0  | 1           | Not-determined  | Genome-fragment | NA    | 0     |
| 52-final-viral-combined_k141_44731   | 1516   | No  | NA    | 0  | 2           | Not-determined  | Genome-fragment | NA    | 0     |
| 52-final-viral-combined_k141_54342   | 4468   | No  | NA    | 0  | 0           | Not-determined  | Genome-fragment | NA    | 0     |
| 52-final-viral-combined_k141_2179    | 2624   | No  | NA    | 0  | 2           | Not-determined  | Genome-fragment | NA    | 0     |
| 52-final-viral-combined_k141_198450  | 2292   | No  | NA    | 0  | 1           | Not-determined  | Genome-fragment | NA    | 0     |
| 52-final-viral-combined_k141_240161  | 23789  | No  | NA    | 0  | 6           | Not-determined  | Genome-fragment | NA    | 0     |
| 52-final-viral-combined_k141_126564  | 1013   | No  | NA    | 0  | 0           | Not-determined  | Genome-fragment | NA    | 0     |
| 52-final-viral-combined_k141_95614   | 6211   | No  | NA    | 0  | 0           | Not-determined  | Genome-fragment | NA    | 0     |
| 52-final-viral-combined_k141_168275  | 1345   | No  | NA    | 0  | 1           | Not-determined  | Genome-fragment | NA    | 0     |
| 52-final-viral-combined_k141_230460  | 13823  | No  | NA    | 0  | 2           | Not-determined  | Genome-fragment | NA    | 0     |
| 52-final-viral-combined_k141_23111   | 4832   | No  | NA    | 0  | 3           | Not-determined  | Genome-fragment | NA    | 0     |
| 52-final-viral-combined_k141_54125   | 2903   | No  | NA    | 0  | 3           | Not-determined  | Genome-fragment | NA    | 0     |
| 51_k141_104359                       | 3709   | Yes | 1545  | 1  | Low-quality | Genome-fragment | 1.91            | 54.34 |       |
| 57-final-viral-combined_k141_223110  | 3709   | No  | NA    | 1  | 1           | Low-quality     | Genome-fragment | 2.33  | 0     |
| 52-final-viral-combined_k141_54153   | 4796   | No  | NA    | 0  | 1           | Not-determined  | Genome-fragment | NA    | 0     |
| 52-final-viral-combined_k141_116047  | 5236   | No  | NA    | 0  | 1           | Not-determined  | Genome-fragment | NA    | 0     |
| 52-final-viral-combined_k141_44829   | 1433   | No  | NA    | 0  | 1           | Not-determined  | Genome-fragment | NA    | 0     |
| 56-final-viral-combined_k141_114133  | 3709   | No  | NA    | 0  | 0           | Low-quality     | Genome-fragment | 1.08  | 0     |
| 52-final-viral-combined_k141_247051  | 156271 | No  | NA    | 6  | 69          | High-quality    | High-quality    | 100   | 0     |
| 58-final-viral-combined_k141_76254   | 3709   | No  | NA    | 0  | 2           | Low-quality     | Genome-fragment | 3.31  | 0     |
| 52-final-viral-combined_k141_116057  | 1229   | No  | NA    | 0  | 0           | Not-determined  | Genome-fragment | NA    | 0     |
| 511-final-viral-combined_k141_154493 | 3710   | No  | NA    | 0  | 1           | Low-quality     | Genome-fragment | 9.62  | 0     |
| 52-final-viral-combined_k141_137115  | 9627   | Yes | 51652 | 19 | 17          | High-quality    | High-quality    | 100   | 46.32 |
| 52-final-viral-combined_k141_137121  | 3035   | No  | NA    | 0  | 3           | Not-determined  | Genome-fragment | NA    | 0     |
| 52-final-viral-combined_k141_188718  | 2564   | No  | NA    | 0  | 0           | Not-determined  | Genome-fragment | NA    | 0     |
| 51_k141_288732                       | 3710   | No  | NA    | 0  | 1           | Low-quality     | Genome-fragment | 6.35  | 0     |
| 52-final-viral-combined_k141_137132  | 1230   | No  | NA    | 0  | 0           | Not-determined  | Genome-fragment | NA    | 0     |
| 57-final-viral-combined_k141_205388  | 3710   | No  | NA    | 0  | 2           | Low-quality     | Genome-fragment | 1.89  | 0     |
| 52-final-viral-combined_k141_168351  | 6387   | No  | NA    | 0  | 1           | Not-determined  | Genome-fragment | NA    | 0     |
| 52-final-viral-combined_k141_44869   | 2063   | No  | NA    | 0  | 0           | Not-determined  | Genome-fragment | NA    | 0     |
| 517-final-viral-combined_k141_202684 | 3710   | No  | NA    | 0  | 2           | Low-quality     | Genome-fragment | 8.42  | 0     |
| 52-final-viral-combined_k141_209211  | 2982   | No  | NA    | 0  | 2           | Not-determined  | Genome-fragment | NA    | 0     |
| 52-final-viral-combined_k141_126611  | 10792  | No  | NA    | 0  | 4           | Not-determined  | Genome-fragment | NA    | 0     |
| 512_k141_63444                       | 3710   | No  | NA    | 0  | 1           | Low-quality     | Genome-fragment | 3.04  | 0     |
| 58-final-viral-combined_k141_41597   | 3710   | No  | NA    | 0  | 2           | Low-quality     | Genome-fragment | 1.71  | 0     |
| 57_k141_77868                        | 3711   | No  | NA    | 1  | 0           | Low-quality     | Genome-fragment | NA    | 0     |
| 52-final-viral-combined_k141_85381   | 43616  | Yes | 27079 | 15 | 9           | Medium-quality  | Genome-fragment | 56.47 | 37.91 |
| 517-final-viral-combined_k141_110958 | 3711   | No  | NA    | 0  | 0           | Low-quality     | Genome-fragment | 3.32  | 0     |
| 52-final-viral-combined_k141_116090  | 2045   | No  | NA    | 0  | 2           | Not-determined  | Genome-fragment | NA    | 0     |
| 52-final-viral-combined_k141_126664  | 5829   | No  | NA    | 0  | 2           | Not-determined  | Genome-fragment | NA    | 0     |
| 52-final-viral-combined_k141_126041  | 8257   | No  | NA    | 0  | 2           | Not-determined  | Genome-fragment | NA    | 0     |
| 512-final-viral-combined_k141_130654 | 3711   | No  | NA    | 0  | 1           | Low-quality     | Genome-fragment | 8.42  | 0     |
| 52-final-viral-combined_k141_157481  | 3272   | No  | NA    | 0  | 2           | Not-determined  | Genome-fragment | NA    | 0     |
| 52-final-viral-combined_k141_188794  | 1677   | No  | NA    | 0  | 0           | Not-determined  | Genome-fragment | NA    | 0     |
| 52-final-viral-combined_k141_126151  | 4253   | No  | NA    | 0  | 2           | Not-determined  | Genome-fragment | NA    | 0     |
| 52-final-viral-combined_k141_147159  | 1573   | No  | NA    | 0  | 3           | Not-determined  | Genome-fragment | NA    | 0     |
| 52-final-viral-combined_k141_219527  | 11248  | No  | NA    | 0  | 4           | Not-determined  | Genome-fragment | NA    | 0     |
| 52-final-viral-combined_k141_209294  | 2896   | No  | NA    | 0  | 2           | Not-determined  | Genome-fragment | NA    | 0     |
| 52-final-viral-combined_k141_178857  | 1229   | No  | NA    | 0  | 1           | Not-determined  | Genome-fragment | NA    | 0     |
| 51-final-viral-combined_k141_201859  | 3712   | No  | NA    | 5  | 0           | Low-quality     | Genome-fragment | 10.54 | 0     |
| 52-final-viral-combined_k141_23162   | 7303   | No  | NA    | 0  | 7           | Not-determined  | Genome-fragment | NA    | 0     |
| 52-final-viral-combined_k141_44945   | 4549   | No  | NA    | 0  | 0           | Not-determined  | Genome-fragment | NA    | 0     |
| 51_k141_67726                        | 3712   | No  | NA    | 0  | 0           | Low-quality     | Genome-fragment | 7.84  | 0     |
| 52-final-viral-combined_k141_12658   | 1436   | No  | NA    | 0  | 0           | Not-determined  | Genome-fragment | NA    | 0     |
| 52-final-viral-combined_k141_54252   | 3186   | No  | NA    | 0  | 1           | Not-determined  | Genome-fragment | NA    | 0     |
| 52-final-viral-combined_k141_219559  | 1695   | No  | NA    | 0  | 0           | Not-determined  | Genome-fragment | NA    | 0     |
| 57_k141_153097                       | 3712   | No  | NA    | 1  | 0           | Low-quality     | Genome-fragment | 6.89  | 0     |
| 512_k141_170141                      | 3712   | No  | NA    | 0  | 2           | Low-quality     | Genome-fragment | 3.69  | 0     |
| 58-final-viral-combined_k141_114901  | 3712   | No  | NA    | 0  | 3           | Low-quality     | Genome-fragment | 1.19  | 0     |
| 52-final-viral-combined_k141_54297   | 2237   | No  | NA    | 0  | 0           | Not-determined  | Genome-fragment | NA    | 0     |
| 58_k141_274740                       | 3712   | No  | NA    | 4  | 0           | Low-quality     | Genome-fragment | 10.18 | 0     |
| 52-final-viral-combined_k141_44904   | 1192   | No  | NA    | 0  | 1           | Not-determined  | Genome-fragment | NA    | 0     |
| 53-final-viral-combined_k141_38285   | 3713   | No  | NA    | 0  | 2           | Low-quality     | Genome-fragment | 2.04  | 0     |
| 52-final-viral-combined_k141_54301   | 1694   | No  | NA    | 0  | 1           | Not-determined  | Genome-fragment | NA    | 0     |
| 52-final-viral-combined_k141_209367  | 1580   | No  | NA    | 0  | 2           | Not-determined  | Genome-fragment | NA    | 0     |
| 55_k141_102801                       | 3713   | No  | NA    | 1  | 0           | Low-quality     | Genome-fragment | 1.86  | 0     |
| 52-final-viral-combined_k141_64388   | 9697   | No  | NA    | 0  | 1           | Not-determined  | Genome-fragment | NA    | 0     |
| 512_k141_165246                      | 3713   | No  | NA    | 2  | 0           | Low-quality     | Genome-fragment | 9.47  | 0     |
| 52-final-viral-combined_k141_54331   | 2007   | No  | NA    | 0  | 3           | Not-determined  | Genome-fragment | NA    | 0     |
| 511-final-viral-combined_k141_306442 | 3714   | No  | NA    | 0  | 0           | Low-quality     | Genome-fragment | 7.04  | 0     |
| 52-final-viral-combined_k141_240385  | 2485   | No  | NA    | 0  | 0           | Not-determined  | Genome-fragment | NA    | 0     |
| 52-final-viral-combined_k141_230852  | 2335   | No  | NA    | 0  | 1           | Not-determined  | Genome-fragment | NA    | 0     |
| 52-final-viral-combined_k141_178742  | 1532   | No  | NA    | 0  | 1           | Not-determined  | Genome-fragment | NA    | 0     |
| 57_k141_232508                       | 3714   | No  | NA    | 3  | 1           | Low-quality     | Genome-fragment | 8.64  | 0     |
| 52-final-viral-combined_k141_240394  | 2232   | No  | NA    | 0  | 1           | Not-determined  | Genome-fragment | NA    | 0     |
| 52-final-viral-combined_k141_209441  | 1045   | No  | NA    | 0  | 0           | Not-determined  | Genome-fragment | NA    | 0     |
| 52-final-viral-combined_k141_157794  | 8276   | No  | NA    | 0  | 4           | Not-determined  | Genome-fragment | NA    | 0     |
| 52-final-viral-combined_k141_230685  | 1568   | No  | NA    | 0  | 2           | Not-determined  | Genome-fragment | NA    | 0     |
| 52-final-viral-combined_k141_232414  | 2285   | No  | NA    | 0  | 4           | Not-determined  | Genome-fragment | NA    | 0     |
| 59-final-viral-combined_k141_79640   | 3715   | No  | NA    | 0  | 1           | Low-quality     | Genome-fragment | 16.77 | 0     |
| 52-final-viral-combined_k141_168524  | 1500   | No  | NA    | 0  | 2           | Not-determined  | Genome-fragment | NA    | 0     |
| 51-final-viral-combined_k141_429968  | 3715   | No  | NA    | 0  | 1           | Low-quality     | Genome-fragment | 8.6   | 0     |
| 55-final-viral-combined_k141_112708  | 3715   | No  | NA    | 1  | 0           | Low-quality     | Genome-fragment | 4.17  | 0     |
| 52-final-viral-combined_k141_85490   | 2259   | No  | NA    | 0  | 2           | Not-determined  | Genome-fragment | NA    | 0     |
| 52-final-viral-combined_k141_12754   | 2250   | No  | NA    | 0  | 2           | Not-determined  | Genome-fragment | NA    | 0     |
| 511-final-viral-combined_k141_164548 | 3716   | No  | 1728  | 1  | 0           | Low-quality     | Genome-fragment | 3.53  | 53.5  |
| 51-final-viral-combined_k141_544637  | 3716   | Yes | NA    | 1  | 1           | Low-quality     | Genome-fragment | 1.09  | 0     |
| 52-final-viral-combined_k141_23281   | 2356   | No  | NA    | 0  | 2           | Not-determined  | Genome-fragment | NA    | 0     |
| 52-final-viral-combined_k141_332201  | 2145   | No  | NA    | 0  | 3           | Not-determined  | Genome-fragment | NA    | 0     |
| 52-final-viral-combined_k141_127277  | 1941   | No  | NA    | 0  | 0           | Not-determined  | Genome-fragment | NA    | 0     |
| 56_k141_30981                        | 3716   | No  | NA    | 0  | 0           | Low-quality     | Genome-fragment | 6.36  | 0     |
| 59_k141_71368                        | 3717   | No  | NA    | 0  | 1           | Low-quality     | Genome-fragment | 6.13  | 0     |
| 52-final-viral-combined_k141_198663  | 10086  | No  | NA    | 0  | 10          | Not-determined  | Genome-fragment | NA    | 0     |
| 51-final-viral-combined_k141_84309   | 2918   | No  | NA    | 2  | 0           | Low-quality     | Genome-fragment | 6.57  | 0     |
| 52-final-viral-combined_k141_32535   | 2933   | No  | NA    | 0  | 0           | Not-determined  | Genome-fragment | NA    | 0     |
| 52-final-viral-combined_k141_23311   | 3795   | No  | NA    | 0  | 2           | Not-determined  | Genome-fragment | NA    | 0     |
| 57_k141_54705                        | 3719   | No  | NA    | 0  | 2           | Low-quality     | Genome-fragment | 0.88  | 0     |
| 52-final-viral-combined_k141_85528   | 9967   | No  | NA    | 0  | 6           | Not-determined  | Genome-fragment | NA    | 0     |
| 52-final-viral-combined_k141_198600  | 4427   | No  | NA    | 0  | 1           | Not-determined  | Genome-fragment | NA    | 0     |
| 52-final-viral-combined_k141_178844  | 3630   | No  | NA    | 0  | 4           | Not-determined  | Genome-fragment | NA    | 0     |
| 52-final-viral-combined_k141_126699  | 1673   | No  | NA    | 0  | 2           | Not-determined  | Genome-fragment | NA    | 0     |
| 512-final-viral-combined_k141_2879   | 3719   | No  | NA    | 0  | 5           | Low-quality     | Genome-fragment | 1.76  | 0     |
| 51-final-viral-combined_k141_109061  | 3720   | No  | NA    | 0  | 3           | Low-quality     | Genome-fragment | 2.26  | 0     |
| 52-final-viral-combined_k141_45090   | 44627  | No  | NA    | 0  | 27          | Not-determined  | Genome-fragment | NA    | 0     |
| 52-final-viral-combined_k141_126715  | 5399   | No  | NA    | 0  | 5           | Not-determined  | Genome-fragment | NA    | 0     |
| 52-final-viral-combined_k141_2391    | 5780   | No  | NA    | 0  | 4           | Not-determined  | Genome-fragment | NA    | 0     |
| 511-final-viral-combined_k141_59005  | 3721   | Yes | 2565  | 1  | 1           | Low-quality     | Genome-fragment | 5.56  | 31.07 |
| 512-final-viral-combined_k141_337999 | 3722   | No  | NA    | 0  | 2           | Low-quality     | Genome-fragment | 3.03  | 0     |
| 52-final-viral-combined_k141_178866  | 1446   | No  | NA    | 0  | 0           | Not-determined  | Genome-fragment | NA    | 0     |
| 52-final-viral-combined_k141_12850   | 2418   | No  | NA    | 0  | 2           | Not-determined  | Genome-fragment | NA    | 0     |
| 52-final-viral-combined_k141_63690   | 3722   | No  | NA    | 0  | 2           | Low-quality     | Genome-fragment | 1.88  | 0     |
| 52-final-viral-combined_k141_24021   | 4024   | No  | NA    | 0  | 1           | Not-determined  | Genome-fragment | NA    | 0     |
| 52-final-viral-combined_k141_137280  | 7115   | No  | NA    | 0  | 7           | Not-determined  | Genome-fragment | NA    | 0     |
| 52-final-viral-combined_k141_137289  | 1205   | No  | NA    | 0  | 0           | Not-determined  | Genome-fragment | NA    | 0     |
| 52-final-viral-combined_k141_64481   | 5363   | No  | NA    | 0  | 3           | Not-determined  | Genome-fragment | NA    | 0     |
| 51_k141_118979                       | 3722   | No  | NA    | 1  | 0           | Low-quality     | Genome-fragment | 3.88  | 0     |
| 52-final-viral-combined_k141_64492   | 1074   | No  | NA    | 0  | 0           | Not-determined  | Genome-fragment | NA    | 0     |
| 52-final-viral-combined_k141_116221  | 90374  | Yes | 78965 | 36 | 22          | High-quality    | High-quality    | 94.24 | 12.62 |
| 57-final-viral-combined_k141_526800  | 3723   | No  | NA    | 0  | 0           | Low-quality     | Genome-fragment | 3.66  | 0     |
| 52-final-viral-combined_k141_132494  | 3723   | No  | NA    | 0  | 0           | Low-quality     | Genome-fragment | 2.28  | 0     |
| 55-final-viral-combined_k141_163427  | 3724   | No  | NA    | 3  | 0           | Low-quality     | Genome-fragment | 10.42 | 0     |
| 52-final-viral-combined_k141_252977  | 3725   | No  | NA    | 0  | 0           | Low-quality     | Genome-fragment | 12.57 | 0     |
| 51_k141_357341                       | 3725   | No  | NA    | 0  | 3           | Low-quality     | Genome-fragment | 1.38  | 0     |
| 57_k141_3283                         | 3725   | No  | NA    | 0  | 1           | Low-quality     | Genome-fragment | 7.12  | 0     |
| 52-final-viral-combined_k141_240562  | 3372   | No  | NA    | 0  | 2           | Not-determined  | Genome-fragment | NA    | 0     |
| 52-final-viral-combined_k141_198713  | 6283   | No  | NA    | 0  | 2           | Not-determined  | Genome-fragment | NA    | 0     |
| 52-final-viral-combined_k141_177155  | 3725   | No  | NA    | 0  | 2           | Low-quality     | Genome-fragment | 3.04  | 0     |
| 52-final-viral-combined_k141_85654   | 1339   | No  | NA    | 0  | 1           | Not-determined  | Genome-fragment | NA    | 0     |
| 52-final-viral-combined_k141_39587   | 10749  | No  | NA    | 0  | 1           | High-quality    | High-quality    | 100   | 0     |
| 52-final-viral-combined_k141_54571   | 2896   | No  | NA    | 0  | 2           | Not-determined  | Genome-fragment | NA    | 0     |
| 52-final-viral-combined_k141_95991   | 1724   | No  | NA    | 0  | 0           | Not-determined  | Genome-fragment | NA    | 0     |
| 511-final-viral-combined_k141_135841 | 3727   | No  | NA    | 0  | 0           | Low-quality     | Genome-fragment | 3.95  | 0     |
| 52-final-viral-combined_k141_23395   | 3743   | No  | NA    | 1  | 4           | Not-determined  | Genome-fragment | NA    | 0     |
| 51_k141_43567                        | 3728   | No  | NA    | 1  | 0           | Low-quality     | Genome-fragment | 2.47  | 0     |
| 52-final-viral-combined_k141         |        |     |       |    |             |                 |                 |       |       |



|                                        |       |       |     |      |    |   |                |                 |    |       |       |
|----------------------------------------|-------|-------|-----|------|----|---|----------------|-----------------|----|-------|-------|
| S2-final-viral-combined_k141_64668]]   | full  | 2419  | No  | NA   | 0  | 1 | Not-determined | Genome-fragment | NA | 0     |       |
| S8-final-viral-combined_k141_23305]]   | full  | 3732  | No  | NA   | 0  | 2 | Low-quality    | Genome-fragment | NA | 3.99  | 0     |
| S5-final-viral-combined_k141_139612]]  | full  | 3733  | No  | NA   | 2  | 0 | Low-quality    | Genome-fragment | NA | 7.01  | 0     |
| S2-final-viral-combined_k141_116332]]  | full  | 2711  | No  | NA   | 0  | 2 | Not-determined | Genome-fragment | NA | 0     | 0     |
| S2-final-viral-combined_k141_106259]]  | full  | 2088  | No  | NA   | 0  | 1 | Not-determined | Genome-fragment | NA | 0     | 0     |
| S2-final-viral-combined_k141_209630]]  | full  | 3450  | No  | NA   | 0  | 1 | Not-determined | Genome-fragment | NA | 0     | 0     |
| S2-final-viral-combined_k141_157996]]  | full  | 1644  | No  | NA   | 0  | 2 | Not-determined | Genome-fragment | NA | 0     | 0     |
| S17_k141_210410                        |       | 3733  | No  | NA   | 1  | 0 | Low-quality    | Genome-fragment | NA | 5.65  | 0     |
| S8_k141_25573                          |       | 3733  | Yes | 2077 | 1  | 1 | Low-quality    | Genome-fragment | NA | 5.09  | 44.36 |
| S1-final-viral-combined_k141_276014]]  | full  | 3734  | No  | NA   | 0  | 3 | Low-quality    | Genome-fragment | NA | 2.8   | 0     |
| S1-final-viral-combined_k141_200210]]  | full  | 3735  | No  | NA   | 0  | 0 | Low-quality    | Genome-fragment | NA | 7     | 0     |
| S17-final-viral-combined_k141_20414]]  | full  | 3735  | No  | NA   | 0  | 0 | Low-quality    | Genome-fragment | NA | 5.47  | 0     |
| S2-final-viral-combined_k141_106275]]  | full  | 5425  | No  | NA   | 3  | 0 | Not-determined | Genome-fragment | NA | 0     | 0     |
| S2-final-viral-combined_k141_96169]]   | full  | 1922  | No  | NA   | 0  | 2 | Not-determined | Genome-fragment | NA | 0     | 0     |
| S2-final-viral-combined_k141_202794]]  | full  | 3735  | No  | NA   | 0  | 1 | Low-quality    | Genome-fragment | NA | 9.37  | 0     |
| S2-final-viral-combined_k141_240641]]  | full  | 1187  | No  | NA   | 0  | 1 | Not-determined | Genome-fragment | NA | 0     | 0     |
| S2-final-viral-combined_k141_54682]]   | full  | 5512  | No  | NA   | 0  | 4 | Not-determined | Genome-fragment | NA | 0     | 0     |
| S4_k141_71916                          |       | 3735  | No  | NA   | 2  | 0 | Low-quality    | Genome-fragment | NA | 6.85  | 0     |
| S2-final-viral-combined_k141_136231]]  | full  | 2026  | No  | NA   | 0  | 2 | Not-determined | Genome-fragment | NA | 0     | 0     |
| S2-final-viral-combined_k141_179069]]  | full  | 2307  | No  | NA   | 0  | 0 | Not-determined | Genome-fragment | NA | 0     | 0     |
| S2-final-viral-combined_k141_64652]]   | full  | 44384 | No  | NA   | 20 | 3 | High-quality   | High-quality    | NA | 100   | 0     |
| S2-final-viral-combined_k141_179072]]  | full  | 4798  | No  | NA   | 0  | 2 | Not-determined | Genome-fragment | NA | 0     | 0     |
| S2-final-viral-combined_k141_85820]]   | full  | 28702 | No  | NA   | 0  | 5 | Not-determined | Genome-fragment | NA | 0     | 0     |
| S2-final-viral-combined_k141_179079]]  | full  | 2558  | No  | NA   | 0  | 4 | Not-determined | Genome-fragment | NA | 0     | 0     |
| S6-final-viral-combined_k141_136070]]  | full  | 3735  | No  | NA   | 0  | 3 | Low-quality    | Genome-fragment | NA | 5.88  | 0     |
| S2-final-viral-combined_k141_13655]]   | full  | 2881  | No  | NA   | 0  | 2 | Not-determined | Genome-fragment | NA | 0     | 0     |
| S7-final-viral-combined_k141_20334]]   | full  | 3736  | No  | NA   | 0  | 0 | Low-quality    | Genome-fragment | NA | 9.08  | 0     |
| S2-final-viral-combined_k141_209654]]  | full  | 2228  | No  | NA   | 0  | 2 | Not-determined | Genome-fragment | NA | 0     | 0     |
| S2-final-viral-combined_k141_168820]]  | full  | 5118  | No  | NA   | 0  | 1 | Not-determined | Genome-fragment | NA | 0     | 0     |
| S12_k141_169984                        |       | 3736  | No  | NA   | 0  | 1 | Low-quality    | Genome-fragment | NA | 3.39  | 0     |
| S2-final-viral-combined_k141_75089]]   | full  | 3093  | No  | NA   | 0  | 1 | Not-determined | Genome-fragment | NA | 0     | 0     |
| S2-final-viral-combined_k141_147510]]  | full  | 3886  | No  | NA   | 0  | 0 | Not-determined | Genome-fragment | NA | 0     | 0     |
| S1-final-viral-combined_k141_240763]]  | full  | 3737  | Yes | 1164 | 1  | 2 | Low-quality    | Genome-fragment | NA | 2.73  | 68.85 |
| S1-final-viral-combined_k141_13635]]   | full  | 3737  | No  | NA   | 2  | 0 | Low-quality    | Genome-fragment | NA | 10.34 | 0     |
| S2-final-viral-combined_k141_240670]]  | full  | 19696 | No  | NA   | 0  | 4 | Not-determined | Genome-fragment | NA | 0     | 0     |
| S2-final-viral-combined_k141_175094]]  | full  | 4288  | No  | NA   | 0  | 0 | Not-determined | Genome-fragment | NA | 0     | 0     |
| S2-final-viral-combined_k141_85859]]   | full  | 1169  | No  | NA   | 0  | 1 | Not-determined | Genome-fragment | NA | 0     | 0     |
| S2-final-viral-combined_k141_179141]]  | full  | 1666  | No  | NA   | 0  | 1 | Not-determined | Genome-fragment | NA | 0     | 0     |
| S2-final-viral-combined_k141_23550]]   | full  | 5684  | No  | NA   | 0  | 7 | Not-determined | Genome-fragment | NA | 0     | 0     |
| S2-final-viral-combined_k141_230913]]  | full  | 3558  | No  | NA   | 0  | 2 | Not-determined | Genome-fragment | NA | 0     | 0     |
| S2-final-viral-combined_k141_189327]]  | full  | 4289  | No  | NA   | 0  | 2 | Not-determined | Genome-fragment | NA | 0     | 0     |
| S3-final-viral-combined_k141_63889]]   | full  | 2737  | No  | NA   | 0  | 0 | Low-quality    | Genome-fragment | NA | 7.57  | 0     |
| S2-final-viral-combined_k141_96299]]   | full  | 1191  | No  | NA   | 0  | 0 | Not-determined | Genome-fragment | NA | 0     | 0     |
| S2-final-viral-combined_k141_23559]]   | full  | 1357  | No  | NA   | 0  | 0 | Not-determined | Genome-fragment | NA | 0     | 0     |
| S2-final-viral-combined_k141_106249]]  | full  | 3737  | No  | NA   | 0  | 0 | Low-quality    | Genome-fragment | NA | 2.48  | 0     |
| S11-final-viral-combined_k141_145699]] | full  | 3738  | No  | NA   | 0  | 1 | Low-quality    | Genome-fragment | NA | 7.48  | 0     |
| S2-final-viral-combined_k141_179184]]  | full  | 1471  | No  | NA   | 0  | 0 | Not-determined | Genome-fragment | NA | 0     | 0     |
| S2-final-viral-combined_k141_2624]]    | full  | 1223  | No  | NA   | 0  | 0 | Not-determined | Genome-fragment | NA | 0     | 0     |
| S2-final-viral-combined_k141_168850]]  | full  | 4610  | No  | NA   | 0  | 2 | Not-determined | Genome-fragment | NA | 0     | 0     |
| S11_k141_33379                         |       | 3738  | No  | NA   | 0  | 0 | Low-quality    | Genome-fragment | NA | 8.03  | 0     |
| S1-final-viral-combined_k141_238376]]  | full  | 3739  | No  | NA   | 3  | 0 | Low-quality    | Genome-fragment | NA | 10.9  | 0     |
| S12-final-viral-combined_k141_282021]] | full  | 3739  | No  | NA   | 0  | 0 | Low-quality    | Genome-fragment | NA | 5.99  | 0     |
| S2-final-viral-combined_k141_127080]]  | full  | 25447 | No  | NA   | 1  | 1 | Medium-quality | Genome-fragment | NA | 61.63 | 0     |
| S7-final-viral-combined_k141_218457]]  | full  | 3740  | No  | NA   | 0  | 2 | Low-quality    | Genome-fragment | NA | 1.24  | 0     |
| S2-final-viral-combined_k141_23758]]   | full  | 2322  | No  | NA   | 0  | 0 | Not-determined | Genome-fragment | NA | 8.9   | 0     |
| S2-final-viral-combined_k141_134016]]  | full  | 3741  | No  | NA   | 0  | 2 | Low-quality    | Genome-fragment | NA | 0     | 0     |
| S2-final-viral-combined_k141_158124]]  | full  | 1287  | No  | NA   | 0  | 1 | Not-determined | Genome-fragment | NA | 0     | 0     |
| S4-final-viral-combined_k141_119951]]  | full  | 3741  | No  | NA   | 0  | 2 | Low-quality    | Genome-fragment | NA | 12.51 | 0     |
| S8-final-viral-combined_k141_256631]]  | full  | 3741  | No  | NA   | 1  | 0 | Low-quality    | Genome-fragment | NA | 9.62  | 0     |
| S8_k141_58200                          |       | 3741  | No  | NA   | 1  | 0 | Low-quality    | Genome-fragment | NA | 7.18  | 0     |
| S2-final-viral-combined_k141_106388]]  | full  | 1582  | No  | NA   | 0  | 0 | Not-determined | Genome-fragment | NA | 5.63  | 0     |
| S2_k141_67563                          |       | 3742  | No  | NA   | 0  | 0 | Low-quality    | Genome-fragment | NA | 0     | 0     |
| S2-final-viral-combined_k141_147708]]  | full  | 5475  | No  | NA   | 0  | 5 | Not-determined | Genome-fragment | NA | 0     | 0     |
| S4-final-viral-combined_k141_6619]]    | full  | 3742  | No  | NA   | 0  | 0 | Low-quality    | Genome-fragment | NA | 8.34  | 0     |
| S2-final-viral-combined_k141_198911]]  | full  | 1641  | No  | NA   | 0  | 0 | Not-determined | Genome-fragment | NA | 0     | 0     |
| S17-final-viral-combined_k141_38939]]  | full  | 3744  | No  | NA   | 1  | 0 | Low-quality    | Genome-fragment | NA | 8.13  | 0     |
| S2-final-viral-combined_k141_143034]]  | full  | 3744  | No  | NA   | 0  | 5 | Low-quality    | Genome-fragment | NA | 1.7   | 0     |
| S2-final-viral-combined_k141_127090]]  | full  | 1433  | No  | NA   | 0  | 1 | Not-determined | Genome-fragment | NA | 0     | 0     |
| S2-final-viral-combined_k141_179271]]  | full  | 1937  | No  | NA   | 0  | 2 | Not-determined | Genome-fragment | NA | 0     | 0     |
| S2-final-viral-combined_k141_127096]]  | full  | 2551  | No  | NA   | 0  | 2 | Not-determined | Genome-fragment | NA | 0     | 0     |
| S2-final-viral-combined_k141_13147]]   | full  | 2514  | No  | NA   | 0  | 3 | Not-determined | Genome-fragment | NA | 3.8   | 0     |
| S4_k141_67396                          |       | 3744  | No  | NA   | 0  | 0 | Low-quality    | Genome-fragment | NA | 0     | 0     |
| S11-final-viral-combined_k141_157470]] | full  | 3745  | No  | NA   | 0  | 3 | Low-quality    | Genome-fragment | NA | 1.81  | 0     |
| S11-final-viral-combined_k141_156268]] | Hzgen | 3745  | No  | NA   | 1  | 0 | Low-quality    | Genome-fragment | NA | 6.69  | 0     |
| S1-final-viral-combined_k141_386248]]  | full  | 3745  | No  | NA   | 0  | 1 | Low-quality    | Genome-fragment | NA | 1.79  | 0     |
| S2-final-viral-combined_k141_54850]]   | full  | 1094  | No  | NA   | 0  | 2 | Not-determined | Genome-fragment | NA | 0     | 0     |
| S7_k141_14205                          |       | 3745  | Yes | 3620 | 1  | 1 | Low-quality    | Genome-fragment | NA | 2.34  | 3.34  |
| S8-final-viral-combined_k141_9804]]    | full  | 3745  | No  | NA   | 2  | 0 | Low-quality    | Genome-fragment | NA | 10.97 | 0     |
| S2-final-viral-combined_k141_198922]]  | full  | 1455  | No  | NA   | 0  | 1 | Not-determined | Genome-fragment | NA | 0     | 0     |
| S1-final-viral-combined_k141_199638]]  | full  | 3746  | No  | NA   | 0  | 0 | Low-quality    | Genome-fragment | NA | 6.41  | 0     |
| S2-final-viral-combined_k141_158155]]  | full  | 2918  | No  | NA   | 0  | 0 | Not-determined | Genome-fragment | NA | 0     | 0     |
| S2-final-viral-combined_k141_158174]]  | full  | 3039  | No  | NA   | 0  | 2 | Not-determined | Genome-fragment | NA | 0     | 0     |
| S4_k141_117539                         |       | 3746  | No  | NA   | 2  | 0 | Low-quality    | Genome-fragment | NA | 5.77  | 0     |
| S11-final-viral-combined_k141_84540]]  | full  | 3747  | No  | NA   | 2  | 0 | Low-quality    | Genome-fragment | NA | 10.11 | 0     |
| S11-final-viral-combined_k141_20274]]  | full  | 3747  | No  | NA   | 0  | 2 | Low-quality    | Genome-fragment | NA | 9.38  | 0     |
| S2-final-viral-combined_k141_127208]]  | full  | 6433  | No  | NA   | 0  | 1 | Not-determined | Genome-fragment | NA | 0     | 0     |
| S2-final-viral-combined_k141_13225]]   | full  | 3339  | No  | NA   | 0  | 0 | Not-determined | Genome-fragment | NA | 0     | 0     |
| S2-final-viral-combined_k141_181319]]  | full  | 3747  | No  | NA   | 0  | 0 | Low-quality    | Genome-fragment | NA | 3.4   | 0     |
| S6_k141_53698                          |       | 3747  | No  | NA   | 1  | 0 | Low-quality    | Genome-fragment | NA | 0     | 0     |
| S2-final-viral-combined_k141_106423]]  | full  | 2395  | No  | NA   | 0  | 2 | Not-determined | Genome-fragment | NA | 0     | 0     |
| S2-final-viral-combined_k141_198975]]  | full  | 5849  | No  | NA   | 0  | 0 | Not-determined | Genome-fragment | NA | 0     | 0     |
| S11-final-viral-combined_k141_96711]]  | full  | 3748  | No  | NA   | 0  | 1 | Low-quality    | Genome-fragment | NA | 1.17  | 0     |
| S1-final-viral-combined_k141_156117]]  | full  | 3749  | No  | NA   | 0  | 1 | Low-quality    | Genome-fragment | NA | 13.07 | 0     |
| S12_k141_210000                        |       | 3750  | No  | NA   | 1  | 0 | Low-quality    | Genome-fragment | NA | 2.05  | 0     |
| S2-final-viral-combined_k141_231027]]  | full  | 12280 | No  | NA   | 1  | 4 | Not-determined | Genome-fragment | NA | 0     | 0     |
| S2-final-viral-combined_k141_199887]]  | full  | 2466  | No  | NA   | 0  | 0 | Not-determined | Genome-fragment | NA | 0     | 0     |
| S2-final-viral-combined_k141_1738]]    | full  | 2793  | No  | NA   | 0  | 3 | Not-determined | Genome-fragment | NA | 0     | 0     |
| S2-final-viral-combined_k141_13953]]   | full  | 1993  | No  | NA   | 0  | 1 | Not-determined | Genome-fragment | NA | 0     | 0     |
| S2-final-viral-combined_k141_106435]]  | full  | 3717  | No  | NA   | 0  | 2 | Not-determined | Genome-fragment | NA | 0     | 0     |
| S2-final-viral-combined_k141_39779]]   | full  | 3750  | No  | NA   | 0  | 1 | Low-quality    | Genome-fragment | NA | 8.61  | 0     |
| S2-final-viral-combined_k141_158224]]  | full  | 3749  | No  | NA   | 0  | 0 | Not-determined | Genome-fragment | NA | 0     | 0     |
| S12-final-viral-combined_k141_107139]] | full  | 3751  | No  | NA   | 0  | 2 | Low-quality    | Genome-fragment | NA | 4.52  | 0     |
| S2-final-viral-combined_k141_240765]]  | full  | 1069  | No  | NA   | 0  | 0 | Not-determined | Genome-fragment | NA | 0     | 0     |
| S2-final-viral-combined_k141_137697]]  | full  | 1507  | No  | NA   | 0  | 1 | Not-determined | Genome-fragment | NA | 0     | 0     |
| S2-final-viral-combined_k141_240771]]  | full  | 2509  | No  | NA   | 0  | 0 | Not-determined | Genome-fragment | NA | 0     | 0     |
| S2-final-viral-combined_k141_116462]]  | full  | 5537  | No  | NA   | 0  | 0 | Not-determined | Genome-fragment | NA | 0     | 0     |
| S2-final-viral-combined_k141_189557]]  | full  | 3856  | No  | NA   | 0  | 3 | Not-determined | Genome-fragment | NA | 0     | 0     |
| S2-final-viral-combined_k141_175033]]  | full  | 3751  | No  | NA   | 0  | 2 | Low-quality    | Genome-fragment | NA | 1.72  | 0     |
| S12-final-viral-combined_k141_202595]] | full  | 3752  | Yes | 985  | 0  | 2 | Low-quality    | Genome-fragment | NA | 0.57  | 73.75 |
| S2-final-viral-combined_k141_137784]]  | full  | 2448  | No  | NA   | 0  | 2 | Not-determined | Genome-fragment | NA | 0     | 0     |
| S2-final-viral-combined_k141_2813]]    | full  | 10208 | No  | NA   | 0  | 4 | Not-determined | Genome-fragment | NA | 0     | 0     |
| S2-final-viral-combined_k141_158291]]  | full  | 4671  | No  | NA   | 1  | 0 | Not-determined | Genome-fragment | NA | 0     | 0     |
| S2-final-viral-combined_k141_139409]]  | full  | 3752  | No  | NA   | 0  | 3 | Low-quality    | Genome-fragment | NA | 4.01  | 0     |
| S12-final-viral-combined_k141_282912]] | full  | 3753  | No  | NA   | 0  | 0 | Low-quality    | Genome-fragment | NA | 5.06  | 0     |
| S2-final-viral-combined_k141_231103]]  | full  | 2946  | No  | NA   | 0  | 0 | Not-determined | Genome-fragment | NA | 0     | 0     |
| S2-final-viral-combined_k141_127304]]  | full  | 3655  | No  | NA   | 0  | 2 | Not-determined | Genome-fragment | NA | 0     | 0     |
| S2-final-viral-combined_k141_96545]]   | full  | 5921  | No  | NA   | 0  | 0 | Not-determined | Genome-fragment | NA | 0     | 0     |
| S2-final-viral-combined_k141_80060]]   | full  | 4673  | No  | NA   | 0  | 2 | Not-determined | Genome-fragment | NA | 0     | 0     |
| S2-final-viral-combined_k141_189544]]  | full  | 1315  | No  | NA   | 0  | 0 | Not-determined | Genome-fragment | NA | 0     | 0     |
| S2-final-viral-combined_k141_96554]]   | full  | 5174  | No  | NA   | 0  | 1 | Not-determined | Genome-fragment | NA | 0     | 0     |
| S2_k141_155408                         |       | 3753  | No  | NA   | 0  | 2 | Low-quality    | Genome-fragment | NA | 0.32  | 0     |
| S8_k141_73146                          |       | 375   |     |      |    |   |                |                 |    |       |       |



|                                       |       |       |     |      |     |   |                |                 |       |       |
|---------------------------------------|-------|-------|-----|------|-----|---|----------------|-----------------|-------|-------|
| S17-final-viral-combined_k141_150547] | [full | 3764  | No  | NA   | 2   | 0 | Low-quality    | Genome-fragment | 7.27  | 0     |
| S2-final-viral-combined_k141_16916]   | [full | 2143  | No  | NA   | 0   | 0 | Not-determined | Genome-fragment | NA    | 0     |
| S2-final-viral-combined_k141_199156]  | [full | 1942  | No  | NA   | 0   | 0 | Not-determined | Genome-fragment | NA    | 0     |
| S2-final-viral-combined_k141_109730]  | [full | 3764  | No  | NA   | 0   | 1 | Low-quality    | Genome-fragment | 4.43  | 0     |
| S2-final-viral-combined_k141_18958]   | [full | 1418  | No  | NA   | 0   | 0 | Not-determined | Genome-fragment | NA    | 0     |
| S2-final-viral-combined_k141_148016]  | [full | 2811  | No  | NA   | 0   | 0 | Not-determined | Genome-fragment | NA    | 0     |
| S5-final-viral-combined_k141_77539]   | [full | 3765  | No  | NA   | 2   | 0 | Low-quality    | Genome-fragment | 6.74  | 0     |
| S2-final-viral-combined_k141_106721]  | [full | 1352  | No  | NA   | 0   | 0 | Not-determined | Genome-fragment | NA    | 0     |
| S2-final-viral-combined_k141_132915]  | [full | 4778  | No  | NA   | 0   | 0 | Not-determined | Genome-fragment | NA    | 0     |
| S2-final-viral-combined_k141_86263]   | [full | 1375  | No  | NA   | 0   | 0 | Not-determined | Genome-fragment | NA    | 0     |
| S7-final-viral-combined_k141_57831]   | [full | 3766  | No  | NA   | 0   | 1 | Low-quality    | Genome-fragment | 2.93  | 0     |
| S2-final-viral-combined_k141_5327]    | [full | 3766  | No  | NA   | 0   | 0 | Low-quality    | Genome-fragment | 8.25  | 0     |
| S1-final-viral-combined_k141_337184]  | [full | 3767  | No  | NA   | 6   | 0 | Low-quality    | Genome-fragment | 8.25  | 0     |
| S2-final-viral-combined_k141_231313]  | [full | 1343  | No  | NA   | 0   | 1 | Not-determined | Genome-fragment | NA    | 0     |
| S2-final-viral-combined_k141_210315]  | [full | 1639  | No  | NA   | 0   | 1 | Not-determined | Genome-fragment | NA    | 0     |
| S2-final-viral-combined_k141_231201]  | [full | 3451  | No  | NA   | 0   | 0 | Not-determined | Genome-fragment | NA    | 0     |
| S2-final-viral-combined_k141_211682]  | [full | 3767  | No  | NA   | 2   | 0 | Low-quality    | Genome-fragment | 11.14 | 0     |
| S2-final-viral-combined_k141_179675]  | [full | 2547  | No  | NA   | 0   | 0 | Not-determined | Genome-fragment | NA    | 0     |
| S2-final-viral-combined_k141_231251]  | [full | 2423  | No  | NA   | 0   | 2 | Not-determined | Genome-fragment | NA    | 0     |
| S2-final-viral-combined_k141_231356]  | [full | 2489  | No  | NA   | 0   | 2 | Not-determined | Genome-fragment | NA    | 0     |
| S4-final-viral-combined_k141_48774]   | [full | 3767  | No  | NA   | 0   | 1 | Low-quality    | Genome-fragment | 5.86  | 0     |
| S2-final-viral-combined_k141_36717]   | [full | 1155  | No  | NA   | 0   | 0 | Not-determined | Genome-fragment | NA    | 0     |
| S11_k141_166086                       |       | 3768  | No  | NA   | 2   | 0 | Low-quality    | Genome-fragment | 4.58  | 0     |
| S3-final-viral-combined_k141_1540]    | [full | 3768  | No  | NA   | 2   | 1 | Low-quality    | Genome-fragment | 6.01  | 0     |
| S2-final-viral-combined_k141_45927]   | [full | 3038  | No  | NA   | 0   | 2 | Not-determined | Genome-fragment | NA    | 0     |
| S2-final-viral-combined_k141_148103]  | [full | 1527  | No  | NA   | 0   | 2 | Not-determined | Genome-fragment | NA    | 0     |
| S5_k141_191346                        |       | 3768  | No  | NA   | 0   | 0 | Low-quality    | Genome-fragment | 6.25  | 0     |
| S17-final-viral-combined_k141_220279] | [full | 3768  | No  | NA   | 0   | 1 | Low-quality    | Genome-fragment | 6.02  | 0     |
| S2-final-viral-combined_k141_148125]  | [full | 1591  | No  | NA   | 0   | 1 | Not-determined | Genome-fragment | NA    | 0     |
| S2-final-viral-combined_k141_65281]   | [full | 2241  | No  | NA   | 0   | 1 | Not-determined | Genome-fragment | NA    | 0     |
| S2-final-viral-combined_k141_230035]  | [full | 3768  | No  | NA   | 5   | 0 | Low-quality    | Genome-fragment | 8.67  | 0     |
| S2-final-viral-combined_k141_106848]  | [full | 2368  | No  | NA   | 0   | 2 | Not-determined | Genome-fragment | NA    | 0     |
| S2-final-viral-combined_k141_210253]  | [full | 2707  | No  | NA   | 0   | 2 | Not-determined | Genome-fragment | NA    | 0     |
| S1_k141_37110                         |       | 3770  | No  | NA   | 0   | 0 | Low-quality    | Genome-fragment | 5.23  | 0     |
| S2-final-viral-combined_k141_138130]  | [full | 1515  | No  | NA   | 0   | 2 | Not-determined | Genome-fragment | NA    | 0     |
| S2-final-viral-combined_k141_45992]   | [full | 3517  | No  | NA   | 0   | 0 | Not-determined | Genome-fragment | NA    | 0     |
| S2-final-viral-combined_k141_231416]  | [full | 3180  | No  | NA   | 0   | 2 | Not-determined | Genome-fragment | NA    | 0     |
| S4-final-viral-combined_k141_155739]  | [full | 3770  | No  | NA   | 1   | 0 | Low-quality    | Genome-fragment | 6.94  | 0     |
| S2-final-viral-combined_k141_138159]  | [full | 1242  | No  | NA   | 0   | 0 | Not-determined | Genome-fragment | NA    | 0     |
| S2-final-viral-combined_k141_158518]  | [full | 3166  | No  | NA   | 0   | 0 | Not-determined | Genome-fragment | NA    | 0     |
| S2-final-viral-combined_k141_185171]  | [full | 2626  | No  | NA   | 0   | 2 | Not-determined | Genome-fragment | NA    | 0     |
| S8_k141_8740                          |       | 3770  | No  | NA   | 1   | 0 | Low-quality    | Genome-fragment | 2.38  | 0     |
| S2-final-viral-combined_k141_116858]  | [full | 2197  | No  | NA   | 0   | 0 | Not-determined | Genome-fragment | NA    | 0     |
| S2-final-viral-combined_k141_158524]  | [full | 4268  | No  | NA   | 0   | 2 | Not-determined | Genome-fragment | NA    | 0     |
| S8-final-viral-combined_k141_210736]  | [full | 3771  | No  | NA   | 0   | 0 | Low-quality    | Genome-fragment | 2.06  | 0     |
| S2-final-viral-combined_k141_13432]   | [full | 4855  | No  | NA   | 0   | 1 | Not-determined | Genome-fragment | NA    | 0     |
| S2-final-viral-combined_k141_210302]  | [full | 1841  | No  | NA   | 0   | 1 | Not-determined | Genome-fragment | NA    | 0     |
| S2-final-viral-combined_k141_116869]  | [full | 2679  | No  | NA   | 0   | 2 | Not-determined | Genome-fragment | NA    | 0     |
| S8-final-viral-combined_k141_59008]   | [full | 3773  | Yes | 2029 | 0   | 1 | Low-quality    | Genome-fragment | 2.51  | 46.22 |
| S9-final-viral-combined_k141_94849]   | [full | 3773  | No  | NA   | 0   | 2 | Low-quality    | Genome-fragment | 2.22  | 0     |
| S2-final-viral-combined_k141_116885]  | [full | 1957  | No  | NA   | 0   | 1 | Not-determined | Genome-fragment | NA    | 0     |
| S2-final-viral-combined_k141_34377]   | [full | 2120  | No  | NA   | 0   | 0 | Not-determined | Genome-fragment | NA    | 0     |
| S6_k141_6862                          |       | 3773  | No  | NA   | 0   | 0 | Low-quality    | Genome-fragment | 3.96  | 0     |
| S1-final-viral-combined_k141_33854]   | [full | 3774  | No  | NA   | 1   | 0 | Low-quality    | Genome-fragment | 6.98  | 0     |
| S2-final-viral-combined_k141_460265]  | [full | 1777  | No  | NA   | 1   | 2 | Not-determined | Genome-fragment | NA    | 0     |
| S8-final-viral-combined_k141_82355]   | [full | 3776  | No  | NA   | 2   | 0 | Low-quality    | Genome-fragment | 24.31 | 0     |
| S2-final-viral-combined_k141_127635]  | [full | 3521  | No  | NA   | 0   | 2 | Not-determined | Genome-fragment | NA    | 0     |
| S7-final-viral-combined_k141_30548]   | [full | 3777  | No  | NA   | 1   | 0 | Low-quality    | Genome-fragment | 2.21  | 0     |
| S2-final-viral-combined_k141_86427]   | [full | 2719  | No  | NA   | 0   | 0 | Not-determined | Genome-fragment | NA    | 0     |
| S17-k141_17871                        |       | 3777  | No  | NA   | 0   | 0 | Low-quality    | Genome-fragment | 5.37  | 0     |
| S2-final-viral-combined_k141_158148]  | [full | 3777  | No  | NA   | 0   | 3 | Low-quality    | Genome-fragment | 4.47  | 0     |
| S8_k141_15539                         |       | 3777  | No  | NA   | 0   | 0 | Low-quality    | Genome-fragment | 4.25  | 0     |
| S2-final-viral-combined_k141_241134]  | [full | 2567  | No  | NA   | 0   | 0 | Not-determined | Genome-fragment | NA    | 0     |
| S2-final-viral-combined_k141_148151]  | [full | 4712  | No  | NA   | 0   | 2 | Not-determined | Genome-fragment | NA    | 0     |
| S1-final-viral-combined_k141_339577]  | [full | 3778  | No  | NA   | 0   | 2 | Low-quality    | Genome-fragment | 4.01  | 0     |
| S2-final-viral-combined_k141_75508]   | [full | 2142  | No  | NA   | 0   | 3 | Not-determined | Genome-fragment | NA    | 0     |
| S2-final-viral-combined_k141_46079]   | [full | 7766  | No  | NA   | 0   | 3 | Not-determined | Genome-fragment | NA    | 0     |
| S12-final-viral-combined_k141_143636] | [full | 3778  | No  | NA   | 5   | 0 | Low-quality    | Genome-fragment | 9.54  | 0     |
| S11-final-viral-combined_k141_284514] | [full | 3779  | Yes | 2419 | 1   | 0 | Low-quality    | Genome-fragment | 5.15  | 35.99 |
| S2-final-viral-combined_k141_189984]  | [full | 1618  | No  | NA   | 0   | 0 | Not-determined | Genome-fragment | NA    | 0     |
| S2-final-viral-combined_k141_13466]   | [full | 4637  | No  | NA   | 0   | 4 | Not-determined | Genome-fragment | NA    | 0     |
| S2-final-viral-combined_k141_46113]   | [full | 1245  | No  | NA   | 0   | 1 | Not-determined | Genome-fragment | NA    | 0     |
| S5-final-viral-combined_k141_96078]   | [full | 3780  | No  | NA   | 0   | 0 | Low-quality    | Genome-fragment | 2.74  | 0     |
| S2-final-viral-combined_k141_220051]  | [full | 1661  | No  | NA   | 0   | 0 | Not-determined | Genome-fragment | NA    | 0     |
| S7_k141_173637                        |       | 3780  | No  | NA   | 0   | 1 | Not-determined | Genome-fragment | 10.66 | 0     |
| S2-final-viral-combined_k141_96806]   | [full | 1448  | No  | NA   | 0   | 1 | Not-determined | Genome-fragment | NA    | 0     |
| S6_k141_124004                        |       | 3780  | No  | NA   | 0   | 0 | Low-quality    | Genome-fragment | 9.96  | 0     |
| S2-final-viral-combined_k141_127654]  | [full | 1529  | No  | NA   | 0   | 1 | Not-determined | Genome-fragment | NA    | 0     |
| S2-final-viral-combined_k141_158619]  | [full | 4822  | No  | NA   | 0   | 2 | Not-determined | Genome-fragment | NA    | 0     |
| S7-final-viral-combined_k141_115057]  | [full | 3781  | No  | NA   | 0   | 0 | Low-quality    | Genome-fragment | 3.9   | 0     |
| S2-final-viral-combined_k141_2384]    | [full | 3146  | No  | NA   | 0   | 4 | Not-determined | Genome-fragment | NA    | 0     |
| S8_k141_41054                         |       | 3781  | No  | NA   | 3   | 0 | Low-quality    | Genome-fragment | 8.42  | 0     |
| S9-final-viral-combined_k141_38974]   | [full | 3782  | No  | NA   | 0   | 2 | Low-quality    | Genome-fragment | 1.18  | 0     |
| S2-final-viral-combined_k141_2386]    | [full | 2954  | No  | NA   | 0   | 1 | Not-determined | Genome-fragment | NA    | 0     |
| S9-final-viral-combined_k141_127451]  | [full | 3782  | No  | NA   | 0   | 0 | Low-quality    | Genome-fragment | 7.86  | 0     |
| S2-final-viral-combined_k141_210423]  | [full | 2058  | No  | NA   | 0   | 0 | Not-determined | Genome-fragment | NA    | 0     |
| S17-k141_113325                       |       | 3783  | No  | NA   | 0   | 1 | Low-quality    | Genome-fragment | 13.19 | 0     |
| S2-final-viral-combined_k141_96834]   | [full | 2589  | No  | NA   | 0   | 3 | Not-determined | Genome-fragment | NA    | 0     |
| S3_k141_69560                         |       | 3784  | No  | NA   | 0   | 1 | Low-quality    | Genome-fragment | 7.11  | 0     |
| S12-final-viral-combined_k141_109218] | [full | 3784  | No  | NA   | 1   | 0 | Low-quality    | Genome-fragment | 5.73  | 0     |
| S2-final-viral-combined_k141_152630]  | [full | 3784  | No  | NA   | 0   | 0 | Low-quality    | Genome-fragment | 11.11 | 0     |
| S2-final-viral-combined_k141_86532]   | [full | 2611  | No  | NA   | 0   | 1 | Not-determined | Genome-fragment | NA    | 0     |
| S2_k141_87482                         |       | 3784  | No  | NA   | 2   | 0 | Low-quality    | Genome-fragment | 9.64  | 0     |
| S4_k141_149757                        |       | 3784  | No  | NA   | 0   | 1 | Low-quality    | Genome-fragment | 11.39 | 0     |
| S8-final-viral-combined_k141_113798]  | [full | 3784  | No  | NA   | 0   | 1 | Low-quality    | Genome-fragment | 0.54  | 0     |
| S2-final-viral-combined_k141_13591]   | [full | 1560  | No  | NA   | 0   | 0 | Not-determined | Genome-fragment | NA    | 0     |
| S2-final-viral-combined_k141_55174]   | [full | 1028  | No  | NA   | 0   | 1 | Not-determined | Genome-fragment | NA    | 0     |
| S2-final-viral-combined_k141_107034]  | [full | 1470  | No  | NA   | 0   | 0 | Not-determined | Genome-fragment | NA    | 0     |
| S11_k141_311803]                      | [full | 3785  | No  | NA   | 0   | 0 | Low-quality    | Genome-fragment | 6.57  | 0     |
| S2-final-viral-combined_k141_148279]  | [full | 1087  | No  | NA   | 0   | 1 | Not-determined | Genome-fragment | NA    | 0     |
| S17-final-viral-combined_k141_166076] | [full | 3786  | No  | NA   | 2   | 0 | Low-quality    | Genome-fragment | 7.37  | 0     |
| S17-k141_203657                       |       | 3786  | No  | NA   | 0   | 0 | Low-quality    | Genome-fragment | 6.4   | 0     |
| S4-final-viral-combined_k141_8739]    | [full | 3786  | No  | NA   | 0   | 2 | Low-quality    | Genome-fragment | 2.25  | 0     |
| S8-final-viral-combined_k141_20250]   | [full | 3786  | No  | NA   | 0   | 0 | Low-quality    | Genome-fragment | 6.51  | 0     |
| S17-final-viral-combined_k141_151085] | [full | 2787  | No  | NA   | 0   | 1 | Low-quality    | Genome-fragment | 8.24  | 0     |
| S2-final-viral-combined_k141_138218]  | [full | 1008  | No  | NA   | 0   | 0 | Not-determined | Genome-fragment | NA    | 0     |
| S2-final-viral-combined_k141_199384]  | [full | 17310 | No  | NA   | 12  | 1 | Medium-quality | Genome-fragment | 54.9  | 0     |
| S4-final-viral-combined_k141_71184]   | [full | 3787  | No  | NA   | 0   | 2 | Low-quality    | Genome-fragment | 3.37  | 0     |
| S2-final-viral-combined_k141_96874]   | [full | 2458  | No  | NA   | 0   | 0 | Not-determined | Genome-fragment | NA    | 0     |
| S12_k141_225076                       |       | 3788  | No  | NA   | 0   | 1 | Low-quality    | Genome-fragment | 6.33  | 0     |
| S2-final-viral-combined_k141_96892]   | [full | 1428  | No  | NA   | 0   | 1 | Not-determined | Genome-fragment | NA    | 0     |
| S2-final-viral-combined_k141_241238]  | [full | 2153  | No  | NA   | 0   | 0 | Not-determined | Genome-fragment | NA    | 0     |
| S8_k141_232740                        |       | 3788  | No  | NA   | 0   | 0 | Low-quality    | Genome-fragment | 2.31  | 0     |
| S2-final-viral-combined_k141_169746]  | [full | 1789  | No  | NA   | 0   | 0 | Not-determined | Genome-fragment | NA    | 0     |
| S2-final-viral-combined_k141_233811]  | [full | 3790  | No  | NA   | 0   | 0 | Low-quality    | Genome-fragment | 6.23  | 0     |
| S12-final-viral-combined_k141_355626] | [full | 3790  | No  | NA   | 5   | 0 | Low-quality    | Genome-fragment | 10.47 | 0     |
| S2-final-viral-combined_k141_117194]  | [full | 8207  | No  | NA   | 0   | 7 | Not-determined | Genome-fragment | NA    | 0     |
| S2-final-viral-combined_k141_233716]  | [full | 4140  | No  | NA   | 0   | 1 | Not-determined | Genome-fragment | NA    | 0     |
| S2-final-viral-combined_k141_75648]   | [full | 3568  | No  | NA   | 0   | 2 | Not-determined | Genome-fragment | NA    | 0     |
| S2-final-viral-combined_k141_190130]  | [full | 3392  | No  | NA   | 0   | 0 | Not-determined | Genome-fragment | NA    | 0     |
| S1_k141_167749                        |       | 3791  | No  | NA   | 1   | 0 | Low-quality    | Genome-fragment | 5.87  | 0     |
| S2-final-viral-combined_k141_14503]   | [full | 3791  | No  | NA   | 1   | 0 | Low-quality    | Genome-fragment | 2.45  | 0     |
| S1-final-viral-combined_k141_134649]  | [full | 3792  | No  | NA   | 1   | 0 | Low-quality    | Genome-fragment | 6.22  | 0     |
| S8-final-viral-combined_k141_233416]  | [full | 3792  | No  | NA   | 0   | 0 | Low-quality    | Genome-fragment | 5.67  | 0     |
| S2-final-viral-combined_k141_137074]  | [full | 1469  | No  | NA   | 0   | 1 | Not-determined | Genome-fragment | NA    | 0     |
| S2-final-viral-combined_k141_220191]  | [full | 2728  | No  | NA   | 0   | 2 | Not-determined | Genome-fragment | NA    | 0     |
| S2-final-viral-combined_k141_190170]  | [full | 2371  | No  | NA   | 0   | 0 | Not-determined | Genome-fragment | NA    | 0     |
| S2-final-viral-combined_k141_148424]  | [full | 1291  | No  | NA   | 0   | 1 | Not-determined | Genome-fragment | NA    | 0     |
| S2-final-viral-combined_k141_46269]   | [full | 1564  | No  | NA   | 0   | 1 | Not-determined | Genome-fragment | NA    | 0     |
| S2-final-viral-combined_k141_148431]  | [full | 2157  | No  | NA   | 0   | 2 | Not-determined | Genome-fragment | NA    | 0     |
| S2-final-viral-combined_k141_158709]  | [full | 1871  | No  | NA   | 0</ |   |                |                 |       |       |



|                                      |        |       |     |       |    |    |                |                 |       |       |
|--------------------------------------|--------|-------|-----|-------|----|----|----------------|-----------------|-------|-------|
| 511-final-viral-combined_k141_109096 | [full] | 3798  | No  | NA    | 0  | 0  | Low-quality    | Genome-fragment | 6.65  | 0     |
| 52-final-viral-combined_k141_180257  | [full] | 2775  | No  | NA    | 0  | 2  | Not-determined | Genome-fragment | NA    | 0     |
| 52-final-viral-combined_k141_241384  | [full] | 6558  | No  | NA    | 0  | 2  | Not-determined | Genome-fragment | NA    | 0     |
| 52-final-viral-combined_k141_138460  | [full] | 1162  | No  | NA    | 0  | 1  | Not-determined | Genome-fragment | NA    | 0     |
| 52-final-viral-combined_k141_3564    | [full] | 4424  | No  | NA    | 0  | 1  | Not-determined | Genome-fragment | NA    | 0     |
| 52-final-viral-combined_k141_218951  | [full] | 1288  | No  | NA    | 0  | 1  | Not-determined | Genome-fragment | NA    | 0     |
| 512-final-viral-combined_k141_352224 | [full] | 3798  | No  | NA    | 2  | 0  | Low-quality    | Genome-fragment | 5.1   | 0     |
| 52-final-viral-combined_k141_180302  | [full] | 7146  | No  | NA    | 0  | 5  | Not-determined | Genome-fragment | NA    | 0     |
| 52-final-viral-combined_k141_180312  | [full] | 1139  | No  | NA    | 0  | 0  | Not-determined | Genome-fragment | NA    | 0     |
| 52-final-viral-combined_k141_55495   | [full] | 17732 | No  | NA    | 11 | 0  | Medium-quality | Genome-fragment | 52.38 | 0     |
| 52-final-viral-combined_k141_13921   | [full] | 3018  | No  | NA    | 0  | 3  | Not-determined | Genome-fragment | NA    | 0     |
| 52-final-viral-combined_k141_37176   | [full] | 1242  | No  | NA    | 0  | 3  | Not-determined | Genome-fragment | NA    | 0     |
| 52-final-viral-combined_k141_180322  | [full] | 3494  | No  | NA    | 0  | 0  | Not-determined | Genome-fragment | NA    | 0     |
| 52_k141_164961                       |        | 3798  | No  | NA    | 2  | 0  | Low-quality    | Genome-fragment | 8.4   | 0     |
| 52-final-viral-combined_k141_170018  | [full] | 7429  | No  | NA    | 0  | 3  | Not-determined | Genome-fragment | NA    | 0     |
| 52-final-viral-combined_k141_158821  | [full] | 2950  | Yes | 25251 | 13 | 0  | Medium-quality | Genome-fragment | 74.04 | 14.8  |
| 52-final-viral-combined_k141_107332  | [full] | 1331  | No  | NA    | 0  | 1  | Not-determined | Genome-fragment | NA    | 0     |
| 51-final-viral-combined_k141_152592  | [full] | 3799  | No  | NA    | 1  | 0  | Low-quality    | Genome-fragment | 10.6  | 0     |
| 52-final-viral-combined_k141_138542  | [full] | 5202  | No  | NA    | 0  | 2  | Not-determined | Genome-fragment | NA    | 0     |
| 57-final-viral-combined_k141_105603  | [full] | 3799  | No  | NA    | 5  | 0  | Low-quality    | Genome-fragment | 11.11 | 0     |
| 52-final-viral-combined_k141_220326  | [full] | 1441  | No  | NA    | 0  | 2  | Not-determined | Genome-fragment | NA    | 0     |
| 52-final-viral-combined_k141_138568  | [full] | 2903  | No  | NA    | 0  | 0  | Not-determined | Genome-fragment | NA    | 0     |
| 511-final-viral-combined_k141_215662 | [full] | 3800  | No  | NA    | 1  | 0  | Low-quality    | Genome-fragment | 6.61  | 0     |
| 52-final-viral-combined_k141_107369  | [full] | 2017  | No  | NA    | 0  | 1  | Not-determined | Genome-fragment | NA    | 0     |
| 51-final-viral-combined_k141_309613  | [full] | 3800  | No  | NA    | 0  | 3  | Low-quality    | Genome-fragment | 0.55  | 0     |
| 52-final-viral-combined_k141_138570  | [full] | 3105  | No  | NA    | 0  | 2  | Not-determined | Genome-fragment | NA    | 0     |
| 52-final-viral-combined_k141_14008   | [full] | 1524  | No  | NA    | 0  | 1  | Not-determined | Genome-fragment | NA    | 0     |
| 52-final-viral-combined_k141_107396  | [full] | 3105  | No  | NA    | 0  | 2  | Not-determined | Genome-fragment | NA    | 0     |
| 512-final-viral-combined_k141_181714 | [full] | 3800  | No  | NA    | 0  | 3  | Low-quality    | Genome-fragment | 1.69  | 0     |
| 52-final-viral-combined_k141_34875   | [full] | 2215  | No  | NA    | 0  | 0  | Not-determined | Genome-fragment | NA    | 0     |
| 52-final-viral-combined_k141_117532  | [full] | 1287  | No  | NA    | 0  | 1  | Not-determined | Genome-fragment | NA    | 0     |
| 512-final-viral-combined_k141_94390  | [full] | 3800  | No  | NA    | 0  | 0  | Low-quality    | Genome-fragment | 8.94  | 0     |
| 52-final-viral-combined_k141_158849  | [full] | 1182  | No  | NA    | 0  | 0  | Not-determined | Genome-fragment | NA    | 0     |
| 512-final-viral-combined_k141_183212 | [full] | 3800  | No  | NA    | 0  | 2  | Low-quality    | Genome-fragment | 4.57  | 0     |
| 52_k141_85743                        |        | 3800  | No  | NA    | 0  | 0  | Low-quality    | Genome-fragment | 4.87  | 0     |
| 52-final-viral-combined_k141_55659   | [full] | 2156  | No  | NA    | 0  | 0  | Not-determined | Genome-fragment | NA    | 0     |
| 54_k141_123259                       |        | 3800  | No  | NA    | 1  | 0  | Low-quality    | Genome-fragment | 3.79  | 0     |
| 58_k141_2537                         |        | 3801  | No  | NA    | 0  | 0  | Low-quality    | Genome-fragment | 8.35  | 0     |
| 59-final-viral-combined_k141_81163   | [full] | 3802  | No  | NA    | 0  | 1  | Low-quality    | Genome-fragment | 6.2   | 0     |
| 52-final-viral-combined_k141_107474  | [full] | 2764  | No  | NA    | 0  | 1  | Not-determined | Genome-fragment | NA    | 0     |
| 511-final-viral-combined_k141_73534  | [full] | 3802  | No  | NA    | 0  | 2  | Low-quality    | Genome-fragment | 2.49  | 0     |
| 52-final-viral-combined_k141_158880  | [full] | 1853  | No  | NA    | 0  | 2  | Not-determined | Genome-fragment | NA    | 0     |
| 52-final-viral-combined_k141_127729  | [full] | 1949  | No  | NA    | 0  | 0  | Not-determined | Genome-fragment | NA    | 0     |
| 52-final-viral-combined_k141_46614   | [full] | 1978  | No  | NA    | 0  | 0  | Not-determined | Genome-fragment | NA    | 0     |
| 52-final-viral-combined_k141_220407  | [full] | 6665  | No  | NA    | 0  | 4  | Not-determined | Genome-fragment | NA    | 0     |
| 52-final-viral-combined_k141_107496  | [full] | 4551  | No  | NA    | 0  | 1  | Not-determined | Genome-fragment | NA    | 0     |
| 52-final-viral-combined_k141_158897  | [full] | 6999  | No  | NA    | 0  | 4  | Not-determined | Genome-fragment | NA    | 0     |
| 57-final-viral-combined_k141_170797  | [full] | 3802  | No  | NA    | 0  | 1  | Low-quality    | Genome-fragment | 7.94  | 0     |
| 52-final-viral-combined_k141_107458  | [full] | 2189  | No  | NA    | 0  | 0  | Not-determined | Genome-fragment | NA    | 0     |
| 52-final-viral-combined_k141_24448   | [full] | 1580  | No  | NA    | 0  | 2  | Not-determined | Genome-fragment | NA    | 0     |
| 517_k141_146465                      |        | 3803  | No  | NA    | 0  | 2  | Low-quality    | Genome-fragment | 8.13  | 0     |
| 52-final-viral-combined_k141_76036   | [full] | 1282  | No  | NA    | 0  | 0  | Not-determined | Genome-fragment | NA    | 0     |
| 512-final-viral-combined_k141_1249   | [full] | 3803  | No  | NA    | 0  | 1  | Low-quality    | Genome-fragment | 2.57  | 0     |
| 51_k141_36273                        |        | 3804  | Yes | 2319  | 1  | 0  | Low-quality    | Genome-fragment | 2.98  | 39.04 |
| 52-final-viral-combined_k141_117614  | [full] | 2536  | No  | NA    | 0  | 0  | Not-determined | Genome-fragment | NA    | 0     |
| 512_k141_97554                       |        | 3804  | No  | NA    | 0  | 4  | Low-quality    | Genome-fragment | 6.29  | 0     |
| 52-final-viral-combined_k141_152163  | [full] | 3804  | No  | NA    | 0  | 2  | Low-quality    | Genome-fragment | 2.13  | 0     |
| 52-final-viral-combined_k141_76071   | [full] | 1521  | No  | NA    | 0  | 1  | Not-determined | Genome-fragment | NA    | 0     |
| 52-final-viral-combined_k141_86970   | [full] | 3145  | No  | NA    | 0  | 0  | Not-determined | Genome-fragment | NA    | 0     |
| 52-final-viral-combined_k141_110822  | [full] | 92842 | No  | NA    | 1  | 22 | High-quality   | High-quality    | 100   | 0     |
| 56_k141_57574                        |        | 3804  | No  | NA    | 0  | 2  | Low-quality    | Genome-fragment | 2.61  | 0     |
| 52-final-viral-combined_k141_158941  | [full] | 1791  | No  | NA    | 0  | 2  | Not-determined | Genome-fragment | NA    | 0     |
| 59_k141_93513                        |        | 3805  | No  | NA    | 1  | 0  | Low-quality    | Genome-fragment | 7.02  | 0     |
| 52-final-viral-combined_k141_24506   | [full] | 1642  | No  | NA    | 0  | 0  | Not-determined | Genome-fragment | NA    | 0     |
| 52-final-viral-combined_k141_220494  | [full] | 2322  | No  | NA    | 0  | 0  | Not-determined | Genome-fragment | NA    | 0     |
| 52-final-viral-combined_k141_232081  | [full] | 2884  | No  | NA    | 0  | 2  | Not-determined | Genome-fragment | NA    | 0     |
| 55-final-viral-combined_k141_38699   | [full] | 3805  | No  | NA    | 0  | 2  | Low-quality    | Genome-fragment | 2.65  | 0     |
| 52-final-viral-combined_k141_24530   | [full] | 1860  | No  | NA    | 0  | 1  | Not-determined | Genome-fragment | NA    | 0     |
| 52-final-viral-combined_k141_87089   | [full] | 2015  | No  | NA    | 0  | 0  | Not-determined | Genome-fragment | NA    | 0     |
| 54-final-viral-combined_k141_42052   | [full] | 3805  | No  | NA    | 0  | 3  | Low-quality    | Genome-fragment | 1.26  | 0     |
| 52-final-viral-combined_k141_65910   | [full] | 3111  | No  | NA    | 0  | 0  | Not-determined | Genome-fragment | NA    | 0     |
| 52-final-viral-combined_k141_190624  | [full] | 26624 | No  | NA    | 1  | 1  | Medium-quality | Genome-fragment | 64.41 | 0     |
| 517-final-viral-combined_k141_99430  | [full] | 3806  | No  | NA    | 1  | 0  | Low-quality    | Genome-fragment | 9.35  | 0     |
| 52-final-viral-combined_k141_76165   | [full] | 1533  | No  | NA    | 0  | 2  | Not-determined | Genome-fragment | NA    | 0     |
| 52-final-viral-combined_k141_37320   | [full] | 1648  | No  | NA    | 0  | 2  | Not-determined | Genome-fragment | NA    | 0     |
| 52-final-viral-combined_k141_190645  | [full] | 1577  | No  | NA    | 0  | 1  | Not-determined | Genome-fragment | NA    | 0     |
| 52-final-viral-combined_k141_199567  | [full] | 1626  | No  | NA    | 0  | 1  | Not-determined | Genome-fragment | NA    | 0     |
| 52-final-viral-combined_k141_46761   | [full] | 37782 | No  | NA    | 0  | 12 | Not-determined | Genome-fragment | NA    | 0     |
| 52-final-viral-combined_k141_65917   | [full] | 3404  | No  | NA    | 0  | 2  | Not-determined | Genome-fragment | NA    | 0     |
| 56-final-viral-combined_k141_41236   | [full] | 3806  | No  | NA    | 0  | 3  | Low-quality    | Genome-fragment | 3.57  | 0     |
| 52-final-viral-combined_k141_65919   | [full] | 1761  | No  | NA    | 0  | 3  | Not-determined | Genome-fragment | NA    | 0     |
| 52-final-viral-combined_k141_159071  | [full] | 1293  | No  | NA    | 0  | 0  | Not-determined | Genome-fragment | NA    | 0     |
| 52-final-viral-combined_k141_199582  | [full] | 8065  | No  | NA    | 0  | 5  | Not-determined | Genome-fragment | NA    | 0     |
| 51-final-viral-combined_k141_4950    | [full] | 3807  | No  | NA    | 0  | 3  | Low-quality    | Genome-fragment | 7.53  | 0     |
| 57_k141_197402                       |        | 3807  | No  | NA    | 0  | 1  | Low-quality    | Genome-fragment | 6.36  | 0     |
| 52-final-viral-combined_k141_24549   | [full] | 65681 | Yes | 25345 | 14 | 35 | Medium-quality | Genome-fragment | 63.84 | 61.41 |
| 52-final-viral-combined_k141_3745    | [full] | 5955  | No  | NA    | 0  | 6  | Not-determined | Genome-fragment | NA    | 0     |
| 52-final-viral-combined_k141_220539  | [full] | 9651  | No  | NA    | 0  | 7  | Not-determined | Genome-fragment | NA    | 0     |
| 517-final-viral-combined_k141_250936 | [full] | 3807  | No  | NA    | 0  | 1  | Low-quality    | Genome-fragment | 8.69  | 0     |
| 51-final-viral-combined_k141_63574   | [full] | 3808  | No  | NA    | 0  | 1  | Low-quality    | Genome-fragment | 5.74  | 0     |
| 52-final-viral-combined_k141_55153   | [full] | 1293  | No  | NA    | 0  | 1  | Not-determined | Genome-fragment | NA    | 0     |
| 52-final-viral-combined_k141_127900  | [full] | 3455  | No  | NA    | 0  | 2  | Not-determined | Genome-fragment | NA    | 0     |
| 57-final-viral-combined_k141_99822   | [full] | 3808  | No  | NA    | 2  | 0  | Low-quality    | Genome-fragment | 6.59  | 0     |
| 52-final-viral-combined_k141_55860   | [full] | 2014  | No  | NA    | 0  | 1  | Not-determined | Genome-fragment | NA    | 0     |
| 52-final-viral-combined_k141_138875  | [full] | 2467  | No  | NA    | 0  | 1  | Not-determined | Genome-fragment | NA    | 0     |
| 511_k141_204358                      |        | 3809  | No  | NA    | 0  | 3  | Low-quality    | Genome-fragment | 6.36  | 0     |
| 517-final-viral-combined_k141_103988 | [full] | 3809  | No  | NA    | 0  | 0  | Low-quality    | Genome-fragment | 1.25  | 0     |
| 58-final-viral-combined_k141_261213  | [full] | 3809  | No  | NA    | 0  | 0  | Low-quality    | Genome-fragment | 4.34  | 0     |
| 52-final-viral-combined_k141_87150   | [full] | 7018  | No  | NA    | 0  | 2  | Not-determined | Genome-fragment | NA    | 0     |
| 52-final-viral-combined_k141_107668  | [full] | 1831  | No  | NA    | 0  | 2  | Not-determined | Genome-fragment | NA    | 0     |
| 52-final-viral-combined_k141_14278   | [full] | 2825  | No  | NA    | 0  | 1  | Not-determined | Genome-fragment | NA    | 0     |
| 52-final-viral-combined_k141_232121  | [full] | 4319  | No  | NA    | 0  | 0  | Not-determined | Genome-fragment | NA    | 0     |
| 52-final-viral-combined_k141_46858   | [full] | 4492  | No  | NA    | 0  | 1  | Not-determined | Genome-fragment | NA    | 0     |
| 52-final-viral-combined_k141_220567  | [full] | 2315  | No  | NA    | 0  | 1  | Not-determined | Genome-fragment | NA    | 0     |
| 51-final-viral-combined_k141_43666   | [full] | 3810  | Yes | 2133  | 1  | 1  | Low-quality    | Genome-fragment | 2.72  | 44.02 |
| 53-final-viral-combined_k141_48566   | [full] | 3810  | No  | NA    | 0  | 0  | Low-quality    | Genome-fragment | 2.52  | 0     |
| 55-final-viral-combined_k141_123026  | [full] | 3810  | No  | NA    | 4  | 0  | Low-quality    | Genome-fragment | 9.78  | 0     |
| 58-final-viral-combined_k141_160557  | [full] | 3810  | No  | NA    | 0  | 1  | Low-quality    | Genome-fragment | 0.35  | 0     |
| 52-final-viral-combined_k141_46880   | [full] | 1440  | No  | NA    | 0  | 1  | Not-determined | Genome-fragment | NA    | 0     |
| 511-final-viral-combined_k141_37151  | [full] | 3812  | No  | NA    | 1  | 0  | Low-quality    | Genome-fragment | 7.62  | 0     |
| 51-final-viral-combined_k141_99120   | [full] | 3812  | No  | NA    | 0  | 3  | Low-quality    | Genome-fragment | 2.43  | 0     |
| 52-final-viral-combined_k141_149021  | [full] | 2407  | No  | NA    | 0  | 0  | Not-determined | Genome-fragment | NA    | 0     |
| 51-final-viral-combined_k141_102198  | [full] | 3813  | No  | NA    | 0  | 1  | Low-quality    | Genome-fragment | 1.28  | 0     |
| 52-final-viral-combined_k141_107738  | [full] | 2183  | No  | NA    | 0  | 0  | Not-determined | Genome-fragment | NA    | 0     |
| 52-final-viral-combined_k141_180848  | [full] | 30412 | No  | NA    | 15 | 0  | Medium-quality | Genome-fragment | 61.73 | 0     |
| 517-final-viral-combined_k141_244869 | [full] | 3813  | No  | NA    | 0  | 2  | Low-quality    | Genome-fragment | 1.37  | 0     |
| 52-final-viral-combined_k141_23282   | [full] | 5874  | No  | NA    | 0  | 7  | Not-determined | Genome-fragment | NA    | 0     |
| 512-final-viral-combined_k141_174159 | [full] | 3813  | No  | NA    | 0  | 2  | Low-quality    | Genome-fragment | 2.47  | 0     |
| 54-final-viral-combined_k141_164401  | [full] | 3813  | No  | NA    | 0  | 0  | Low-quality    | Genome-fragment | 9.1   | 0     |
| 57-final-viral-combined_k141_63003   | [full] | 3814  | No  | NA    | 0  | 4  | Low-quality    | Genome-fragment | 2.12  | 0     |
| 52-final-viral-combined_k141_46955   | [full] | 1248  | No  | NA    | 0  | 0  | Not-determined | Genome-fragment | NA    | 0     |
| 517-final-viral-combined_k141_103203 | [full] | 3815  | No  | NA    | 0  | 1  | Low-quality    | Genome-fragment | 9.2   | 0     |
| 51-final-viral-combined_k141_230433  | [full] | 3816  | No  | NA    | 4  | 0  | Low-quality    | Genome-fragment | 8.06  | 0     |
| 52-final-viral-combined_k141_14360   | [full] | 6004  | No  | NA    | 0  | 3  | Not-determined | Genome-fragment | NA    | 0     |
| 52-final-viral-combined_k141_87151   | [full] | 6588  | No  | NA    | 0  | 5  | Not-determined | Genome-fragment | NA    | 0     |
| 52-final-viral-combined_k141_220664  | [full] | 2882  | No  | NA    | 0  | 2  | Not-determined | Genome-fragment | NA    | 0     |
| 51-final-viral-combined_k141_257376  | [full] | 3816  | No  | NA    | 0  | 0  | Low-quality    | Genome-fragment | 6.86  | 0     |
| 51_k141_148975                       |        | 3816  | No  | NA    | 0  | 0  | Low-quality    | Genome-fragment | 8.5   | 0     |
| 52-final-viral-combined_k141_138944  | [full] | 4234  | No  | NA</  |    |    |                |                 |       |       |



|                                      |           |       |    |    |   |    |                |                 |       |   |
|--------------------------------------|-----------|-------|----|----|---|----|----------------|-----------------|-------|---|
| S11-final-viral-combined_k141_51749  | [full]    | 3826  | No | NA | 0 | 1  | Low-quality    | Genome-fragment | 7.9   | 0 |
| S17-final-viral-combined_k141_77372  | [full]    | 3826  | No | NA | 0 | 1  | Low-quality    | Genome-fragment | 7.2   | 0 |
| S2-final-viral-combined_k141_87455   | [full]    | 1205  | No | NA | 0 | 1  | Not-determined | Genome-fragment | NA    | 0 |
| S12-final-viral-combined_k141_179401 | [full]    | 3826  | No | NA | 0 | 0  | Low-quality    | Genome-fragment | 24.56 | 0 |
| S8-final-viral-combined_k141_21048   | [full]    | 3826  | No | NA | 0 | 1  | Low-quality    | Genome-fragment | 2.72  | 0 |
| S2-final-viral-combined_k141_33474   | [full]    | 2320  | No | NA | 0 | 0  | Not-determined | Genome-fragment | NA    | 0 |
| S3_k141_26151                        |           | 3827  | No | NA | 0 | 1  | Low-quality    | Genome-fragment | 8.13  | 0 |
| S2-final-viral-combined_k141_170351  | [full]    | 1648  | No | NA | 0 | 0  | Not-determined | Genome-fragment | NA    | 0 |
| S2-final-viral-combined_k141_211040  | [full]    | 1478  | No | NA | 0 | 2  | Not-determined | Genome-fragment | NA    | 0 |
| S7-final-viral-combined_k141_12612   | [full]    | 3827  | No | NA | 1 | 0  | Low-quality    | Genome-fragment | 4.82  | 0 |
| S2-final-viral-combined_k141_118114  | [full]    | 2285  | No | NA | 0 | 2  | Not-determined | Genome-fragment | NA    | 0 |
| S1-final-viral-combined_k141_205555  | [full]    | 3828  | No | NA | 0 | 0  | Low-quality    | Genome-fragment | 11.69 | 0 |
| S2-final-viral-combined_k141_97678   | [full]    | 5530  | No | NA | 0 | 0  | Not-determined | Genome-fragment | NA    | 0 |
| S2-final-viral-combined_k141_170387  | [full]    | 1233  | No | NA | 0 | 1  | Not-determined | Genome-fragment | NA    | 0 |
| S2-final-viral-combined_k141_107883  | [full]    | 1248  | No | NA | 0 | 0  | Not-determined | Genome-fragment | NA    | 0 |
| S2-final-viral-combined_k141_35488   | [full]    | 1760  | No | NA | 0 | 0  | Not-determined | Genome-fragment | NA    | 0 |
| S2-final-viral-combined_k141_170404  | [full]    | 1720  | No | NA | 0 | 0  | Not-determined | Genome-fragment | NA    | 0 |
| S2-final-viral-combined_k141_56276   | [full]    | 1881  | No | NA | 0 | 2  | Not-determined | Genome-fragment | NA    | 0 |
| S7-final-viral-combined_k141_145593  | [full]    | 3828  | No | NA | 1 | 3  | Low-quality    | Genome-fragment | 2.92  | 0 |
| S2-final-viral-combined_k141_97696   | [full]    | 3044  | No | NA | 0 | 1  | Not-determined | Genome-fragment | NA    | 0 |
| S12-final-viral-combined_k141_54255  | [full]    | 3828  | No | NA | 3 | 0  | Low-quality    | Genome-fragment | 9.74  | 0 |
| S4_k141_54574                        |           | 3828  | No | NA | 0 | 4  | Low-quality    | Genome-fragment | 1.64  | 0 |
| S2-final-viral-combined_k141_97708   | [full]    | 1403  | No | NA | 0 | 2  | Not-determined | Genome-fragment | NA    | 0 |
| S1-final-viral-combined_k141_308049  | [full]    | 3829  | No | NA | 0 | 2  | Low-quality    | Genome-fragment | 6.43  | 0 |
| S2-final-viral-combined_k141_146095  | [full]    | 3829  | No | NA | 0 | 0  | Low-quality    | Genome-fragment | 7.53  | 0 |
| S2-final-viral-combined_k141_56322   | [full]    | 1859  | No | NA | 0 | 1  | Not-determined | Genome-fragment | NA    | 0 |
| S2-final-viral-combined_k141_244920  | [full]    | 3829  | No | NA | 0 | 3  | Low-quality    | Genome-fragment | 1.37  | 0 |
| S2-final-viral-combined_k141_181005  | [full]    | 1270  | No | NA | 0 | 1  | Not-determined | Genome-fragment | NA    | 0 |
| S2-final-viral-combined_k141_35507   | [full]    | 2007  | No | NA | 0 | 0  | Not-determined | Genome-fragment | NA    | 0 |
| S8_k141_168738                       |           | 3829  | No | NA | 3 | 0  | Low-quality    | Genome-fragment | 8.73  | 0 |
| S8_k141_51870                        |           | 3829  | No | NA | 2 | 0  | Low-quality    | Genome-fragment | 5.26  | 0 |
| S11-final-viral-combined_k141_327041 | [full]    | 3830  | No | NA | 0 | 0  | Low-quality    | Genome-fragment | 7.7   | 0 |
| S2-final-viral-combined_k141_190897  | [full]    | 1657  | No | NA | 0 | 2  | Not-determined | Genome-fragment | NA    | 0 |
| S2-final-viral-combined_k141_87581   | [full]    | 2266  | No | NA | 0 | 1  | Not-determined | Genome-fragment | NA    | 0 |
| S2-final-viral-combined_k141_220526  | [full]    | 2725  | No | NA | 0 | 17 | Not-determined | Genome-fragment | NA    | 0 |
| S2-final-viral-combined_k141_181066  | [full]    | 2426  | No | NA | 0 | 2  | Not-determined | Genome-fragment | NA    | 0 |
| S2-final-viral-combined_k141_87607   | [full]    | 3064  | No | NA | 0 | 2  | Not-determined | Genome-fragment | NA    | 0 |
| S2-final-viral-combined_k141_3948    | [full]    | 1741  | No | NA | 0 | 1  | Not-determined | Genome-fragment | NA    | 0 |
| S2-final-viral-combined_k141_181075  | [full]    | 5375  | No | NA | 0 | 5  | Not-determined | Genome-fragment | NA    | 0 |
| S1-final-viral-combined_k141_252357  | [full]    | 3830  | No | NA | 0 | 3  | Low-quality    | Genome-fragment | 2.88  | 0 |
| S17-final-viral-combined_k141_221568 | [full]    | 3830  | No | NA | 0 | 0  | Low-quality    | Genome-fragment | 2.7   | 0 |
| S2-final-viral-combined_k141_149361  | [full]    | 5110  | No | NA | 0 | 3  | Not-determined | Genome-fragment | NA    | 0 |
| S12-final-viral-combined_k141_211219 | [full]    | 3830  | No | NA | 2 | 0  | Low-quality    | Genome-fragment | 8.36  | 0 |
| S2-final-viral-combined_k141_159359  | [full]    | 1751  | No | NA | 0 | 2  | Not-determined | Genome-fragment | NA    | 0 |
| S2-final-viral-combined_k141_479321  | [full]    | 4893  | No | NA | 0 | 1  | Not-determined | Genome-fragment | NA    | 0 |
| S2-final-viral-combined_k141_190581  | [full]    | 3381  | No | NA | 0 | 12 | Not-determined | Genome-fragment | NA    | 0 |
| S2-final-viral-combined_k141_169395  | [full]    | 3830  | No | NA | 0 | 2  | Low-quality    | Genome-fragment | 5.39  | 0 |
| S11_k141_105072                      |           | 3832  | No | NA | 3 | 0  | Low-quality    | Genome-fragment | 6.62  | 0 |
| S9_k141_47343                        |           | 3833  | No | NA | 0 | 1  | Low-quality    | Genome-fragment | 1.06  | 0 |
| S11-final-viral-combined_k141_325922 | [full]    | 3833  | No | NA | 4 | 0  | Low-quality    | Genome-fragment | 11.17 | 0 |
| S2-final-viral-combined_k141_87662   | [full]    | 2017  | No | NA | 0 | 2  | Not-determined | Genome-fragment | NA    | 0 |
| S2-final-viral-combined_k141_159408  | [full]    | 1678  | No | NA | 0 | 2  | Not-determined | Genome-fragment | NA    | 0 |
| S2-final-viral-combined_k141_159410  | [full]    | 1227  | No | NA | 0 | 1  | Not-determined | Genome-fragment | NA    | 0 |
| S2-final-viral-combined_k141_128072  | [full]    | 5839  | No | NA | 0 | 3  | Not-determined | Genome-fragment | NA    | 0 |
| S3-final-viral-combined_k141_39977   | [full]    | 3833  | No | NA | 0 | 0  | Low-quality    | Genome-fragment | 5.97  | 0 |
| S11-final-viral-combined_k141_160511 | [full]    | 3834  | No | NA | 5 | 0  | Low-quality    | Genome-fragment | 10.3  | 0 |
| S2-final-viral-combined_k141_87696   | [full]    | 2321  | No | NA | 0 | 3  | Not-determined | Genome-fragment | NA    | 0 |
| S2-final-viral-combined_k141_149362  | [full]    | 1736  | No | NA | 0 | 2  | Not-determined | Genome-fragment | NA    | 0 |
| S2-final-viral-combined_k141_159404  | [full]    | 3055  | No | NA | 0 | 1  | Not-determined | Genome-fragment | NA    | 0 |
| S2-final-viral-combined_k141_200107  | [full]    | 2594  | No | NA | 0 | 0  | Not-determined | Genome-fragment | NA    | 0 |
| S2-final-viral-combined_k141_13756   | [full]    | 3834  | No | NA | 0 | 1  | Low-quality    | Genome-fragment | 8.61  | 0 |
| S7-final-viral-combined_k141_61381   | [full]    | 3834  | No | NA | 0 | 0  | Low-quality    | Genome-fragment | 9.46  | 0 |
| S2-final-viral-combined_k141_139331  | [full]    | 1476  | No | NA | 0 | 0  | Not-determined | Genome-fragment | NA    | 0 |
| S2-final-viral-combined_k141_56532   | [full]    | 1564  | No | NA | 0 | 1  | Not-determined | Genome-fragment | NA    | 0 |
| S2-final-viral-combined_k141_149280  | [full]    | 2579  | No | NA | 0 | 1  | Not-determined | Genome-fragment | NA    | 0 |
| S1_k141_108538                       |           | 3835  | No | NA | 1 | 0  | Low-quality    | Genome-fragment | 8.48  | 0 |
| S2-final-viral-combined_k141_159488  | [full]    | 2532  | No | NA | 0 | 1  | Not-determined | Genome-fragment | NA    | 0 |
| S17-final-viral-combined_k141_22342  | [full]    | 3835  | No | NA | 0 | 2  | Low-quality    | Genome-fragment | 6     | 0 |
| S2-final-viral-combined_k141_181541  | [full]    | 4079  | No | NA | 0 | 4  | Not-determined | Genome-fragment | NA    | 0 |
| S2-final-viral-combined_k141_211188  | [full]    | 3633  | No | NA | 0 | 0  | Not-determined | Genome-fragment | NA    | 0 |
| S12-final-viral-combined_k141_21234  | [full]    | 3835  | No | NA | 0 | 2  | Low-quality    | Genome-fragment | 9.08  | 0 |
| S5-final-viral-combined_k141_34574   | [full]    | 3836  | No | NA | 0 | 2  | Low-quality    | Genome-fragment | 7.38  | 0 |
| S17_k141_1721                        |           | 3836  | No | NA | 0 | 0  | Low-quality    | Genome-fragment | 4.95  | 0 |
| S2-final-viral-combined_k141_97908   | [full]    | 2233  | No | NA | 0 | 3  | Not-determined | Genome-fragment | NA    | 0 |
| S2-final-viral-combined_k141_14626   | [full]    | 1277  | No | NA | 0 | 1  | Not-determined | Genome-fragment | NA    | 0 |
| S2-final-viral-combined_k141_4086    | [full]    | 2100  | No | NA | 0 | 1  | Not-determined | Genome-fragment | NA    | 0 |
| S2-final-viral-combined_k141_220960  | [full]    | 1560  | No | NA | 0 | 1  | Not-determined | Genome-fragment | NA    | 0 |
| S2-final-viral-combined_k141_139377  | [full]    | 3456  | No | NA | 0 | 1  | Not-determined | Genome-fragment | NA    | 0 |
| S11-final-viral-combined_k141_3330   | [full]    | 3837  | No | NA | 0 | 0  | Low-quality    | Genome-fragment | 8.12  | 0 |
| S2-final-viral-combined_k141_76821   | [full]    | 1035  | No | NA | 0 | 0  | Not-determined | Genome-fragment | NA    | 0 |
| S1-final-viral-combined_k141_97742   | [full]    | 3837  | No | NA | 1 | 0  | Low-quality    | Genome-fragment | 2.36  | 0 |
| S12-final-viral-combined_k141_157383 | [full]    | 3837  | No | NA | 0 | 2  | Low-quality    | Genome-fragment | 1.93  | 0 |
| S2-final-viral-combined_k141_128171  | [full]    | 2091  | No | NA | 0 | 0  | Not-determined | Genome-fragment | NA    | 0 |
| S2-final-viral-combined_k141_76837   | [full]    | 1919  | No | NA | 0 | 2  | Not-determined | Genome-fragment | NA    | 0 |
| S7-final-viral-combined_k141_97622   | [full]    | 3838  | No | NA | 0 | 0  | Low-quality    | Genome-fragment | 5.84  | 0 |
| S12-final-viral-combined_k141_126106 | [full]    | 3838  | No | NA | 2 | 0  | Low-quality    | Genome-fragment | 6.89  | 0 |
| S2-final-viral-combined_k141_220983  | [full]    | 4058  | No | NA | 0 | 0  | Not-determined | Genome-fragment | NA    | 0 |
| S9_k141_116999                       |           | 3839  | No | NA | 0 | 2  | Low-quality    | Genome-fragment | 3.44  | 0 |
| S2-final-viral-combined_k141_191046  | [full]    | 2087  | No | NA | 0 | 1  | Not-determined | Genome-fragment | NA    | 0 |
| S2-final-viral-combined_k141_24976   | [full]    | 2479  | No | NA | 0 | 0  | Not-determined | Genome-fragment | NA    | 0 |
| S2_k141_201102                       |           | 3841  | No | NA | 0 | 4  | Low-quality    | Genome-fragment | 2     | 0 |
| S2-final-viral-combined_k141_66535   | [full]    | 1898  | No | NA | 0 | 1  | Not-determined | Genome-fragment | NA    | 0 |
| S2-final-viral-combined_k141_47481   | [full]    | 1675  | No | NA | 0 | 0  | Not-determined | Genome-fragment | NA    | 0 |
| S2-final-viral-combined_k141_212153  | [full]    | 3815  | No | NA | 0 | 2  | Not-determined | Genome-fragment | NA    | 0 |
| S2-final-viral-combined_k141_221012  | [full]    | 2026  | No | NA | 0 | 0  | Not-determined | Genome-fragment | NA    | 0 |
| S2_k141_101339                       |           | 3841  | No | NA | 1 | 0  | Low-quality    | Genome-fragment | 2.43  | 0 |
| S11-final-viral-combined_k141_28530  | [full]    | 3842  | No | NA | 0 | 0  | Low-quality    | Genome-fragment | 8.46  | 0 |
| S2-final-viral-combined_k141_212180  | [full]    | 1673  | No | NA | 0 | 2  | Not-determined | Genome-fragment | NA    | 0 |
| S2-final-viral-combined_k141_108141  | [full]    | 2624  | No | NA | 0 | 2  | Not-determined | Genome-fragment | NA    | 0 |
| S1-final-viral-combined_k141_335664  | [full]    | 3842  | No | NA | 0 | 0  | Low-quality    | Genome-fragment | 8.69  | 0 |
| S1-final-viral-combined_k141_237828  | [full]    | 3842  | No | NA | 0 | 3  | Low-quality    | Genome-fragment | 3.16  | 0 |
| S1_k141_159847                       |           | 3842  | No | NA | 0 | 0  | Low-quality    | Genome-fragment | 9.05  | 0 |
| S2-final-viral-combined_k141_76883   | [full]    | 1187  | No | NA | 0 | 1  | Not-determined | Genome-fragment | NA    | 0 |
| S17_k141_179426                      |           | 3842  | No | NA | 0 | 1  | Low-quality    | Genome-fragment | 8.76  | 0 |
| S2_k141_17511                        |           | 3843  | No | NA | 0 | 2  | Low-quality    | Genome-fragment | 0.54  | 0 |
| S2-final-viral-combined_k141_211299  | [full]    | 1483  | No | NA | 0 | 2  | Not-determined | Genome-fragment | NA    | 0 |
| S17-final-viral-combined_k141_92222  | [full]    | 3845  | No | NA | 0 | 2  | Low-quality    | Genome-fragment | 0.45  | 0 |
| S2-final-viral-combined_k141_56566   | [full]    | 5405  | No | NA | 0 | 4  | Not-determined | Genome-fragment | NA    | 0 |
| S2-final-viral-combined_k141_145191  | [full]    | 3845  | No | NA | 0 | 0  | Low-quality    | Genome-fragment | 11.64 | 0 |
| S2-final-viral-combined_k141_66596   | [full]    | 1491  | No | NA | 0 | 0  | Not-determined | Genome-fragment | NA    | 0 |
| S2-final-viral-combined_k141_221044  | [full]    | 15701 | No | NA | 0 | 10 | Not-determined | Genome-fragment | NA    | 0 |
| S8_k141_90744                        |           | 3845  | No | NA | 0 | 0  | Low-quality    | Genome-fragment | 9.38  | 0 |
| S9-final-viral-combined_k141_66239   | [full]    | 3846  | No | NA | 0 | 0  | Low-quality    | Genome-fragment | 8.02  | 0 |
| S9-final-viral-combined_k141_85111   | [full]    | 3846  | No | NA | 0 | 0  | Low-quality    | Genome-fragment | 7.67  | 0 |
| S2-final-viral-combined_k141_66631   | [full]    | 1914  | No | NA | 0 | 1  | Not-determined | Genome-fragment | NA    | 0 |
| S1-final-viral-combined_k141_149018  | [full]    | 3846  | No | NA | 0 | 0  | Low-quality    | Genome-fragment | 9.89  | 0 |
| S2-final-viral-combined_k141_241885  | [full]    | 1978  | No | NA | 0 | 0  | Not-determined | Genome-fragment | NA    | 0 |
| S3-final-viral-combined_k141_28682   | [1/2]gene | 3846  | No | NA | 1 | 0  | Low-quality    | Genome-fragment | 2.66  | 0 |
| S2-final-viral-combined_k141_315003  | [full]    | 3847  | No | NA | 0 | 0  | Low-quality    | Genome-fragment | 1.11  | 0 |
| S8-final-viral-combined_k141_101464  | [full]    | 3847  | No | NA | 1 | 0  | Low-quality    | Genome-fragment | 28.38 | 0 |
| S2-final-viral-combined_k141_25054   | [full]    | 1239  | No | NA | 0 | 0  | Not-determined | Genome-fragment | NA    | 0 |
| S9-final-viral-combined_k141_69423   | [full]    | 3848  | No | NA | 0 | 0  | Low-quality    | Genome-fragment | 10.31 | 0 |
| S11_k141_124225                      |           | 3848  | No | NA | 0 | 1  | Low-quality    | Genome-fragment | 5.28  | 0 |
| S1-final-viral-combined_k141_281269  | [full]    | 3848  | No | NA | 1 | 0  | Low-quality    | Genome-fragment | 9.99  | 0 |
| S2-final-viral-combined_k141_200190  | [full]    | 2406  | No | NA | 0 | 2  | Not-determined | Genome-fragment | NA    | 0 |
| S2-final-viral-combined_k141_25030   | [full]    | 1477  | No | NA | 0 | 2  | Not-determined | Genome-fragment | NA    | 0 |
| S2-final-viral-combined_k141_76991   | [full]    | 1148  | No | NA | 0 | 0  | Not-determined | Genome-fragment | NA    | 0 |
| S2-final-viral-combined_k141_77008   | [full]    | 1129  | No | NA | 0 | 1  | Not-determined | Genome-fragment | NA    | 0 |
| S3-final-viral-combined_k141_1718    | [full]    | 3848  | No | NA | 0 | 0  | Low-quality    | Genome-fragment | 3.61  | 0 |
| S2-final-viral-combined_k141_35099   | [full]    | 2188  | No | NA | 0 | 3  | Not-determined | Genome-fragment | NA    | 0 |
| S2-final-viral-combined_k141_181388  | [full]    | 1556  | No | NA | 0 |    |                |                 |       |   |



|                                      |        |       |     |       |    |    |                |                 |     |       |       |
|--------------------------------------|--------|-------|-----|-------|----|----|----------------|-----------------|-----|-------|-------|
| S2-final-viral-combined_k141_159752  | [full] | 2372  | No  | NA    | 0  | 1  | Not-determined | Genome-fragment | NA  | 0     | 0     |
| S5_k141_151520                       |        | 3856  | No  | NA    | 0  | 0  | Low-quality    | Genome-fragment | NA  | 7.8   | 0     |
| S2-final-viral-combined_k141_159774  | [full] | 2089  | No  | NA    | 0  | 0  | Not-determined | Genome-fragment | NA  | 0     | 0     |
| S2-final-viral-combined_k141_139667  | [full] | 2978  | No  | NA    | 0  | 0  | Not-determined | Genome-fragment | NA  | 0     | 0     |
| S2-final-viral-combined_k141_212156  | [full] | 4154  | No  | NA    | 0  | 0  | Not-determined | Genome-fragment | NA  | 0     | 0     |
| S2-final-viral-combined_k141_149648  | [full] | 15863 | No  | NA    | 0  | 12 | Not-determined | Genome-fragment | NA  | 0     | 0     |
| S17-k141_259837                      |        | 3856  | No  | NA    | 3  | 0  | Low-quality    | Genome-fragment | NA  | 5.18  | 0     |
| S1-final-viral-combined_k141_18942   | [full] | 3857  | No  | NA    | 0  | 3  | Low-quality    | Genome-fragment | NA  | 4.11  | 0     |
| S7_k141_144451                       |        | 3857  | No  | NA    | 0  | 1  | Low-quality    | Genome-fragment | NA  | 2.7   | 0     |
| S2-final-viral-combined_k141_85772   | [full] | 3857  | No  | NA    | 3  | 0  | Low-quality    | Genome-fragment | NA  | 13.11 | 0     |
| S2-final-viral-combined_k141_77255   | [full] | 3857  | No  | NA    | 3  | 0  | Low-quality    | Genome-fragment | NA  | 9.65  | 0     |
| S2-final-viral-combined_k141_56769   | [full] | 1447  | No  | NA    | 0  | 1  | Not-determined | Genome-fragment | NA  | 0     | 0     |
| S12-final-viral-combined_k141_193317 | [full] | 3860  | No  | NA    | 0  | 0  | Low-quality    | Genome-fragment | NA  | 5.88  | 0     |
| S2-final-viral-combined_k141_102873  | [full] | 3860  | No  | NA    | 2  | 0  | Low-quality    | Genome-fragment | NA  | 6.98  | 0     |
| S7-final-viral-combined_k141_24258   | [full] | 3861  | No  | NA    | 4  | 0  | Low-quality    | Genome-fragment | NA  | 9.58  | 0     |
| S2-final-viral-combined_k141_139768  | [full] | 4381  | No  | NA    | 0  | 2  | Not-determined | Genome-fragment | NA  | 0     | 0     |
| S2-final-viral-combined_k141_159835  | [full] | 2518  | No  | NA    | 0  | 1  | Not-determined | Genome-fragment | NA  | 0     | 0     |
| S2-final-viral-combined_k141_181464  | [full] | 2653  | No  | NA    | 0  | 2  | Not-determined | Genome-fragment | NA  | 0     | 0     |
| S2-final-viral-combined_k141_1708    | [full] | 3862  | No  | NA    | 0  | 1  | Low-quality    | Genome-fragment | NA  | 6.87  | 0     |
| S5-final-viral-combined_k141_160665  | [full] | 3864  | No  | NA    | 0  | 0  | Low-quality    | Genome-fragment | NA  | 10.44 | 0     |
| S2_k141_187505                       |        | 3864  | No  | NA    | 0  | 0  | Low-quality    | Genome-fragment | NA  | 5.96  | 0     |
| S9-final-viral-combined_k141_5657    | [full] | 3865  | No  | NA    | 0  | 3  | Low-quality    | Genome-fragment | NA  | 3.99  | 0     |
| S11-final-viral-combined_k141_110603 | [full] | 3865  | No  | NA    | 0  | 1  | Low-quality    | Genome-fragment | NA  | 5.71  | 0     |
| S2-final-viral-combined_k141_149708  | [full] | 2294  | No  | NA    | 0  | 1  | Not-determined | Genome-fragment | NA  | 0     | 0     |
| S2-final-viral-combined_k141_4366    | [full] | 2513  | No  | NA    | 0  | 3  | Not-determined | Genome-fragment | NA  | 0     | 0     |
| S2-final-viral-combined_k141_211561  | [full] | 1002  | No  | NA    | 0  | 1  | Not-determined | Genome-fragment | NA  | 0     | 0     |
| S1-final-viral-combined_k141_131908  | [full] | 3866  | No  | NA    | 0  | 1  | Low-quality    | Genome-fragment | NA  | 5.7   | 0     |
| S5-final-viral-combined_k141_24210   | [full] | 3866  | No  | NA    | 4  | 0  | Low-quality    | Genome-fragment | NA  | 9.63  | 0     |
| S2-final-viral-combined_k141_77288   | [full] | 1756  | No  | NA    | 0  | 1  | Not-determined | Genome-fragment | NA  | 0     | 0     |
| S2-final-viral-combined_k141_15017   | [full] | 6572  | No  | NA    | 0  | 2  | Not-determined | Genome-fragment | NA  | 0     | 0     |
| S2-final-viral-combined_k141_139835  | [full] | 3735  | No  | NA    | 0  | 3  | Not-determined | Genome-fragment | NA  | 0     | 0     |
| S2-final-viral-combined_k141_242080  | [full] | 1440  | No  | NA    | 0  | 0  | Not-determined | Genome-fragment | NA  | 0     | 0     |
| S2-final-viral-combined_k141_149769  | [full] | 1346  | No  | NA    | 0  | 0  | Not-determined | Genome-fragment | NA  | 0     | 0     |
| S17-final-viral-combined_k141_158807 | [full] | 3866  | No  | NA    | 4  | 0  | Low-quality    | Genome-fragment | NA  | 9.2   | 0     |
| S2-final-viral-combined_k141_211577  | [full] | 2685  | No  | NA    | 0  | 1  | Not-determined | Genome-fragment | NA  | 0     | 0     |
| S2-final-viral-combined_k141_205090  | [full] | 3866  | No  | NA    | 0  | 1  | Low-quality    | Genome-fragment | NA  | 0.92  | 0     |
| S2-final-viral-combined_k141_200390  | [full] | 90161 | Yes | 37148 | 17 | 26 | Complete       | High-quality    | 100 | 58.8  | 0     |
| S1-final-viral-combined_k141_20541   | [full] | 3867  | No  | NA    | 0  | 3  | Low-quality    | Genome-fragment | NA  | 3.11  | 0     |
| S2-final-viral-combined_k141_23356   | [full] | 6455  | No  | NA    | 0  | 3  | Not-determined | Genome-fragment | NA  | 0     | 0     |
| S1-final-viral-combined_k141_341466  | [full] | 3867  | No  | NA    | 2  | 0  | Low-quality    | Genome-fragment | NA  | 10.32 | 0     |
| S4-final-viral-combined_k141_12595   | [full] | 3868  | No  | NA    | 2  | 0  | Low-quality    | Genome-fragment | NA  | 2.23  | 0     |
| S2-final-viral-combined_k141_139881  | [full] | 1644  | No  | NA    | 0  | 0  | Not-determined | Genome-fragment | NA  | 0     | 0     |
| S2-final-viral-combined_k141_221491  | [full] | 6769  | No  | NA    | 0  | 2  | Not-determined | Genome-fragment | NA  | 0     | 0     |
| S12-final-viral-combined_k141_390553 | [full] | 3869  | No  | NA    | 4  | 0  | Low-quality    | Genome-fragment | NA  | 8.92  | 0     |
| S2-final-viral-combined_k141_77370   | [full] | 1061  | No  | NA    | 0  | 1  | Not-determined | Genome-fragment | NA  | 0     | 0     |
| S2-final-viral-combined_k141_77376   | [full] | 4111  | No  | NA    | 0  | 1  | Not-determined | Genome-fragment | NA  | 0     | 0     |
| S1-final-viral-combined_k141_383458  | [full] | 3870  | No  | NA    | 0  | 1  | Low-quality    | Genome-fragment | NA  | 6.8   | 0     |
| S2-final-viral-combined_k141_98523   | [full] | 10338 | No  | NA    | 0  | 6  | Not-determined | Genome-fragment | NA  | 0     | 0     |
| S5-final-viral-combined_k141_13077   | [full] | 3870  | No  | NA    | 0  | 1  | Low-quality    | Genome-fragment | NA  | 10.79 | 0     |
| S2-final-viral-combined_k141_47947   | [full] | 2580  | No  | NA    | 0  | 1  | Not-determined | Genome-fragment | NA  | 0     | 0     |
| S2-final-viral-combined_k141_98531   | [full] | 1152  | No  | NA    | 0  | 0  | Not-determined | Genome-fragment | NA  | 0     | 0     |
| S2-final-viral-combined_k141_15140   | [full] | 1817  | No  | NA    | 0  | 0  | Not-determined | Genome-fragment | NA  | 0     | 0     |
| S17-final-viral-combined_k141_3832   | [full] | 3870  | No  | NA    | 0  | 4  | Low-quality    | Genome-fragment | NA  | 2.25  | 0     |
| S12-final-viral-combined_k141_188215 | [full] | 3870  | No  | NA    | 4  | 0  | Low-quality    | Genome-fragment | NA  | 11.75 | 0     |
| S2-final-viral-combined_k141_118817  | [full] | 1242  | No  | NA    | 0  | 0  | Not-determined | Genome-fragment | NA  | 0     | 0     |
| S2-final-viral-combined_k141_139949  | [full] | 1504  | No  | NA    | 0  | 1  | Not-determined | Genome-fragment | NA  | 0     | 0     |
| S2-final-viral-combined_k141_200464  | [full] | 3010  | No  | NA    | 0  | 3  | Not-determined | Genome-fragment | NA  | 0     | 0     |
| S2-final-viral-combined_k141_3637    | [full] | 8240  | No  | NA    | 0  | 4  | Not-determined | Genome-fragment | NA  | 0     | 0     |
| S2-final-viral-combined_k141_47978   | [full] | 1323  | No  | NA    | 0  | 0  | Not-determined | Genome-fragment | NA  | 0     | 0     |
| S9-final-viral-combined_k141_77130   | [full] | 3871  | No  | NA    | 0  | 2  | Low-quality    | Genome-fragment | NA  | 1.69  | 0     |
| S2-final-viral-combined_k141_88034   | [full] | 1077  | No  | NA    | 0  | 0  | Not-determined | Genome-fragment | NA  | 0     | 0     |
| S2-final-viral-combined_k141_36343   | [full] | 3428  | No  | NA    | 0  | 2  | Not-determined | Genome-fragment | NA  | 0     | 0     |
| S2-final-viral-combined_k141_191337  | [full] | 1597  | No  | NA    | 0  | 0  | Not-determined | Genome-fragment | NA  | 0     | 0     |
| S2-final-viral-combined_k141_66891   | [full] | 2332  | No  | NA    | 0  | 0  | Not-determined | Genome-fragment | NA  | 0     | 0     |
| S2-final-viral-combined_k141_47984   | [full] | 3880  | No  | NA    | 0  | 1  | Not-determined | Genome-fragment | NA  | 0     | 0     |
| S1-final-viral-combined_k141_114071  | [full] | 3871  | No  | NA    | 0  | 1  | Low-quality    | Genome-fragment | NA  | 2.65  | 0     |
| S2-final-viral-combined_k141_152181  | [full] | 2921  | No  | NA    | 0  | 0  | Not-determined | Genome-fragment | NA  | 0     | 0     |
| S2-final-viral-combined_k141_149857  | [full] | 2715  | No  | NA    | 0  | 1  | Not-determined | Genome-fragment | NA  | 0     | 0     |
| S2-final-viral-combined_k141_211717  | [full] | 1498  | No  | NA    | 0  | 0  | Not-determined | Genome-fragment | NA  | 0     | 0     |
| S2-final-viral-combined_k141_48029   | [full] | 4337  | No  | NA    | 0  | 1  | Not-determined | Genome-fragment | NA  | 0     | 0     |
| S2-final-viral-combined_k141_57001   | [full] | 1534  | No  | NA    | 0  | 0  | Not-determined | Genome-fragment | NA  | 0     | 0     |
| S5_k141_16038                        |        | 3871  | Yes | 1587  | 1  | 1  | Low-quality    | Genome-fragment | NA  | 1.47  | 59    |
| S9-final-viral-combined_k141_86696   | [full] | 3872  | Yes | 2649  | 1  | 1  | Low-quality    | Genome-fragment | NA  | 6.38  | 31.59 |
| S2-final-viral-combined_k141_200504  | [full] | 1903  | No  | NA    | 0  | 0  | Not-determined | Genome-fragment | NA  | 0     | 0     |
| S9-final-viral-combined_k141_58348   | [full] | 3872  | No  | NA    | 0  | 0  | Low-quality    | Genome-fragment | NA  | 7.6   | 0     |
| S2-final-viral-combined_k141_57036   | [full] | 3124  | No  | NA    | 0  | 4  | Not-determined | Genome-fragment | NA  | 0     | 0     |
| S13-final-viral-combined_k141_200508 | [full] | 5137  | No  | NA    | 0  | 3  | Not-determined | Genome-fragment | NA  | 0     | 0     |
| S2-final-viral-combined_k141_233107  | [full] | 16186 | No  | NA    | 0  | 5  | Medium-quality | Genome-fragment | NA  | 52.08 | 0     |
| S11_k141_212423                      |        | 3872  | No  | NA    | 0  | 1  | Low-quality    | Genome-fragment | NA  | 2.2   | 0     |
| S2-final-viral-combined_k141_98670   | [full] | 2197  | No  | NA    | 0  | 0  | Not-determined | Genome-fragment | NA  | 0     | 0     |
| S2-final-viral-combined_k141_233111  | [full] | 1026  | No  | NA    | 0  | 0  | Not-determined | Genome-fragment | NA  | 0     | 0     |
| S17-final-viral-combined_k141_167908 | [full] | 3874  | No  | NA    | 0  | 1  | Low-quality    | Genome-fragment | NA  | 6.89  | 0     |
| S2-final-viral-combined_k141_200524  | [full] | 2559  | No  | NA    | 0  | 1  | Not-determined | Genome-fragment | NA  | 0     | 0     |
| S2-final-viral-combined_k141_67014   | [full] | 1734  | No  | NA    | 0  | 1  | Not-determined | Genome-fragment | NA  | 0     | 0     |
| S2-final-viral-combined_k141_57005   | [full] | 1940  | No  | NA    | 0  | 2  | Not-determined | Genome-fragment | NA  | 0     | 0     |
| S2-final-viral-combined_k141_98683   | [full] | 1623  | No  | NA    | 0  | 1  | Not-determined | Genome-fragment | NA  | 0     | 0     |
| S2-final-viral-combined_k141_191396  | [full] | 4334  | No  | NA    | 0  | 1  | Not-determined | Genome-fragment | NA  | 0     | 0     |
| S2-final-viral-combined_k141_200527  | [full] | 1416  | No  | NA    | 0  | 2  | Not-determined | Genome-fragment | NA  | 0     | 0     |
| S2-final-viral-combined_k141_181581  | [full] | 1759  | No  | NA    | 0  | 0  | Not-determined | Genome-fragment | NA  | 0     | 0     |
| S12-final-viral-combined_k141_168808 | [full] | 3874  | No  | NA    | 1  | 0  | Low-quality    | Genome-fragment | NA  | 9.04  | 0     |
| S2-final-viral-combined_k141_191428  | [full] | 4206  | No  | NA    | 0  | 1  | Not-determined | Genome-fragment | NA  | 8.62  | 0     |
| S8-final-viral-combined_k141_233567  | [full] | 3874  | No  | NA    | 0  | 0  | Low-quality    | Genome-fragment | NA  | 1.45  | 0     |
| S9_k141_73702                        |        | 3875  | No  | NA    | 0  | 2  | Low-quality    | Genome-fragment | NA  | 0.62  | 0     |
| S11_k141_60769                       |        | 1317  | No  | NA    | 0  | 0  | Not-determined | Genome-fragment | NA  | 0     | 0     |
| S2-final-viral-combined_k141_211554  | [full] | 3875  | No  | NA    | 0  | 1  | Low-quality    | Genome-fragment | NA  | 4.91  | 0     |
| S2-final-viral-combined_k141_24494   | [full] | 3875  | No  | NA    | 0  | 4  | Low-quality    | Genome-fragment | NA  | 5.94  | 0     |
| S4-final-viral-combined_k141_139556  | [full] | 1589  | No  | NA    | 0  | 1  | Not-determined | Genome-fragment | NA  | 0     | 0     |
| S2-final-viral-combined_k141_24842   | [full] | 1589  | No  | NA    | 0  | 0  | Low-quality    | Genome-fragment | NA  | 8.79  | 0     |
| S5-final-viral-combined_k141_137151  | [full] | 3876  | No  | NA    | 0  | 0  | Low-quality    | Genome-fragment | NA  | 0     | 0     |
| S2-final-viral-combined_k141_233219  | [full] | 7892  | No  | NA    | 0  | 2  | Not-determined | Genome-fragment | NA  | 0     | 0     |
| S2-final-viral-combined_k141_211584  | [full] | 2283  | No  | NA    | 0  | 1  | Not-determined | Genome-fragment | NA  | 0     | 0     |
| S17-k141_164878                      |        | 3876  | No  | 3094  | 1  | 1  | Low-quality    | Genome-fragment | NA  | 8.17  | 20.18 |
| S2-final-viral-combined_k141_25487   | [full] | 2185  | No  | NA    | 0  | 0  | Not-determined | Genome-fragment | NA  | 0     | 0     |
| S12-final-viral-combined_k141_239813 | [full] | 3876  | No  | NA    | 0  | 0  | Low-quality    | Genome-fragment | NA  | 10.27 | 0     |
| S1-final-viral-combined_k141_179619  | [full] | 3877  | Yes | 2681  | 1  | 1  | Low-quality    | Genome-fragment | NA  | 6.71  | 30.85 |
| S2-final-viral-combined_k141_57212   | [full] | 1698  | No  | NA    | 0  | 0  | Not-determined | Genome-fragment | NA  | 0     | 0     |
| S3_k141_66733                        |        | 3877  | No  | NA    | 0  | 1  | Low-quality    | Genome-fragment | NA  | 0.33  | 0     |
| S5_k141_120358                       |        | 3877  | No  | NA    | 0  | 0  | Low-quality    | Genome-fragment | NA  | 4.31  | 0     |
| S12_k141_187868                      |        | 3877  | No  | NA    | 0  | 1  | Low-quality    | Genome-fragment | NA  | 2.62  | 0     |
| S1-final-viral-combined_k141_238111  | [full] | 3878  | No  | NA    | 0  | 2  | Low-quality    | Genome-fragment | NA  | 1.22  | 0     |
| S2-final-viral-combined_k141_88223   | [full] | 18499 | No  | NA    | 0  | 15 | Not-determined | Genome-fragment | NA  | 0     | 0     |
| S2-final-viral-combined_k141_88241   | [full] | 3159  | No  | NA    | 0  | 0  | Not-determined | Genome-fragment | NA  | 0     | 0     |
| S12-final-viral-combined_k141_67564  | [full] | 3878  | No  | NA    | 1  | 2  | Low-quality    | Genome-fragment | NA  | 2.46  | 0     |
| S2-final-viral-combined_k141_233304  | [full] | 2483  | No  | NA    | 0  | 2  | Not-determined | Genome-fragment | NA  | 0     | 0     |
| S2-final-viral-combined_k141_191507  | [full] | 1623  | No  | NA    | 0  | 0  | Not-determined | Genome-fragment | NA  | 0     | 0     |
| S2-final-viral-combined_k141_242402  | [full] | 6128  | No  | NA    | 0  | 4  | Not-determined | Genome-fragment | NA  | 0     | 0     |
| S2-final-viral-combined_k141_187111  | [full] | 4911  | No  | NA    | 0  | 4  | Not-determined | Genome-fragment | NA  | 0     | 0     |
| S1-final-viral-combined_k141_97264   | [full] | 3880  | No  | NA    | 0  | 1  | Low-quality    | Genome-fragment | NA  | 6.09  | 0     |
| S12-final-viral-combined_k141_165558 | [full] | 3880  | No  | NA    | 0  | 0  | Low-quality    | Genome-fragment | NA  | 2.51  | 0     |
| S2-final-viral-combined_k141_36626   | [full] | 2382  | No  | NA    | 0  | 1  | Not-determined | Genome-fragment | NA  | 0     | 0     |
| S2-final-viral-combined_k141_108417  | [full] | 5441  | No  | NA    | 0  | 1  | Not-determined | Genome-fragment | NA  | 0     | 0     |
| S8_k141_120269                       |        | 3880  | No  | NA    | 1  | 0  | Low-quality    | Genome-fragment | NA  | 8.55  | 0     |
| S17-final-viral-combined_k141_163594 | [full  |       |     |       |    |    |                |                 |     |       |       |



|                                      |        |        |     |      |   |    |                |                 |                 |       |   |
|--------------------------------------|--------|--------|-----|------|---|----|----------------|-----------------|-----------------|-------|---|
| S3-final-viral-combined_k141_28363   | [full] | 3893   | No  | NA   | 0 | 3  | Low-quality    | Genome-fragment | 3.13            | 0     |   |
| S1_k141_8543                         |        | 3893   | No  | NA   | 2 | 0  | Low-quality    | Genome-fragment | 7.43            | 0     |   |
| S2-final-viral-combined_k141_108518  | [full] | 7863   | No  | NA   | 0 | 6  | Not-determined | Genome-fragment | NA              | 0     |   |
| S1_k141_140523                       |        | 3894   | No  | NA   | 0 | 0  | Low-quality    | Genome-fragment | 1.22            | 0     |   |
| S5_k141_145841                       |        | 3894   | No  | NA   | 0 | 1  | Low-quality    | Genome-fragment | 1.57            | 0     |   |
| S7-final-viral-combined_k141_141468  | [full] | 3895   | No  | NA   | 0 | 0  | Low-quality    | Genome-fragment | 9.58            | 0     |   |
| S17-k141_211228                      |        | 3895   | No  | NA   | 0 | 0  | Low-quality    | Genome-fragment | 4.11            | 0     |   |
| S2-final-viral-combined_k141_575041  | [full] | 1014   | No  | NA   | 0 | 1  | Not-determined | Genome-fragment | NA              | 0     |   |
| S2-final-viral-combined_k141_233610  | [full] | 2844   | No  | NA   | 0 | 1  | Not-determined | Genome-fragment | NA              | 0     |   |
| S2-final-viral-combined_k141_77969   | [full] | 3049   | No  | NA   | 0 | 2  | Not-determined | Genome-fragment | NA              | 0     |   |
| S2-final-viral-combined_k141_212124  | [full] | 1307   | No  | NA   | 0 | 0  | 1              | Not-determined  | Genome-fragment | NA    | 0 |
| S3-final-viral-combined_k141_171865  | [full] | 2140   | No  | NA   | 0 | 1  | Not-determined | Genome-fragment | NA              | 0     |   |
| S2-final-viral-combined_k141_77979   | [full] | 2504   | No  | NA   | 0 | 0  | 1              | Not-determined  | Genome-fragment | NA    | 0 |
| S2-final-viral-combined_k141_119408  | [full] | 1873   | No  | NA   | 0 | 0  | 1              | Not-determined  | Genome-fragment | NA    | 0 |
| S14-final-viral-combined_k141_114832 | [full] | 3886   | Yes | 2541 | 1 | 1  | Low-quality    | Genome-fragment | 9.93            | 34.78 |   |
| S17-final-viral-combined_k141_48688  | [full] | 3886   | No  | NA   | 0 | 0  | Low-quality    | Genome-fragment | 0               | 0     |   |
| S9-final-viral-combined_k141_48570   | [full] | 3888   | No  | NA   | 3 | 0  | Low-quality    | Genome-fragment | 8.48            | 0     |   |
| S12_k141_61966                       |        | 3888   | No  | NA   | 0 | 2  | Low-quality    | Genome-fragment | 2.15            | 0     |   |
| S2-final-viral-combined_k141_119423  | [full] | 1123   | No  | NA   | 0 | 0  | Not-determined | Genome-fragment | NA              | 0     |   |
| S2-final-viral-combined_k141_77988   | [full] | 2201   | No  | NA   | 0 | 2  | Not-determined | Genome-fragment | NA              | 0     |   |
| S11-final-viral-combined_k141_105554 | [full] | 3900   | No  | NA   | 1 | 0  | Low-quality    | Genome-fragment | 10.16           | 0     |   |
| S3-final-viral-combined_k141_171731  | [full] | 2262   | No  | NA   | 0 | 0  | Not-determined | Genome-fragment | NA              | 0     |   |
| S2-final-viral-combined_k141_15708   | [full] | 1131   | No  | NA   | 0 | 2  | Not-determined | Genome-fragment | NA              | 0     |   |
| S1-final-viral-combined_k141_111587  | [full] | 3900   | No  | NA   | 1 | 0  | Low-quality    | Genome-fragment | 26.26           | 0     |   |
| S17-k141_38652                       |        | 3900   | No  | NA   | 0 | 1  | Low-quality    | Genome-fragment | 12.45           | 0     |   |
| S2-final-viral-combined_k141_108597  | [full] | 1768   | No  | NA   | 0 | 0  | Not-determined | Genome-fragment | NA              | 0     |   |
| S2-final-viral-combined_k141_171746  | [full] | 1314   | No  | NA   | 0 | 1  | Not-determined | Genome-fragment | NA              | 0     |   |
| S2-final-viral-combined_k141_191753  | [full] | 1057   | No  | NA   | 0 | 1  | Not-determined | Genome-fragment | NA              | 0     |   |
| S2-final-viral-combined_k141_88649   | [full] | 1280   | No  | NA   | 0 | 0  | Not-determined | Genome-fragment | NA              | 0     |   |
| S2-final-viral-combined_k141_191761  | [full] | 2061   | No  | NA   | 0 | 1  | Not-determined | Genome-fragment | NA              | 0     |   |
| S2-final-viral-combined_k141_119479  | [full] | 1179   | No  | NA   | 0 | 0  | Not-determined | Genome-fragment | NA              | 0     |   |
| S2-final-viral-combined_k141_12876   | [full] | 3194   | No  | NA   | 3 | 1  | Not-determined | Genome-fragment | NA              | 0     |   |
| S8-final-viral-combined_k141_209496  | [full] | 3900   | No  | NA   | 4 | 0  | Low-quality    | Genome-fragment | 10.82           | 0     |   |
| S2-final-viral-combined_k141_160276  | [full] | 2219   | No  | NA   | 0 | 2  | Not-determined | Genome-fragment | NA              | 0     |   |
| S2-final-viral-combined_k141_201037  | [full] | 3291   | No  | NA   | 0 | 2  | Not-determined | Genome-fragment | NA              | 0     |   |
| S2-final-viral-combined_k141_150184  | [full] | 1707   | No  | NA   | 0 | 0  | Not-determined | Genome-fragment | NA              | 0     |   |
| S2-final-viral-combined_k141_150414  | [full] | 1616   | No  | NA   | 0 | 2  | Not-determined | Genome-fragment | NA              | 0     |   |
| S2-final-viral-combined_k141_88675   | [full] | 1005   | No  | NA   | 0 | 0  | Not-determined | Genome-fragment | NA              | 0     |   |
| S4-final-viral-combined_k141_75181   | [full] | 3901   | No  | NA   | 0 | 1  | Low-quality    | Genome-fragment | 4.13            | 0     |   |
| S2-final-viral-combined_k141_233689  | [full] | 1522   | No  | NA   | 0 | 0  | Not-determined | Genome-fragment | NA              | 0     |   |
| S2-final-viral-combined_k141_4638    | [full] | 2486   | No  | NA   | 0 | 0  | Not-determined | Genome-fragment | NA              | 0     |   |
| S2-final-viral-combined_k141_211846  | [full] | 1476   | No  | NA   | 0 | 0  | Not-determined | Genome-fragment | NA              | 0     |   |
| S1-final-viral-combined_k141_285722  | [full] | 3902   | No  | NA   | 1 | 0  | Low-quality    | Genome-fragment | 9.78            | 0     |   |
| S5-final-viral-combined_k141_52179   | [full] | 3902   | No  | NA   | 4 | 0  | Low-quality    | Genome-fragment | 9.61            | 0     |   |
| S11-final-viral-combined_k141_325666 | [full] | 3903   | No  | NA   | 1 | 0  | Low-quality    | Genome-fragment | 8.89            | 0     |   |
| S2-final-viral-combined_k141_37241   | [full] | 3903   | No  | NA   | 0 | 0  | Low-quality    | Genome-fragment | 8.23            | 0     |   |
| S2-final-viral-combined_k141_67354   | [full] | 33027  | No  | NA   | 0 | 16 | Not-determined | Genome-fragment | NA              | 0     |   |
| S2-final-viral-combined_k141_165148  | [full] | 3904   | No  | NA   | 0 | 4  | Low-quality    | Genome-fragment | 2.38            | 0     |   |
| S2-final-viral-combined_k141_78153   | [full] | 2240   | No  | NA   | 0 | 0  | Not-determined | Genome-fragment | NA              | 0     |   |
| S2-final-viral-combined_k141_48531   | [full] | 3065   | No  | NA   | 0 | 4  | Not-determined | Genome-fragment | NA              | 0     |   |
| S12-final-viral-combined_k141_350639 | [full] | 3904   | No  | NA   | 2 | 0  | Low-quality    | Genome-fragment | 10.03           | 0     |   |
| S2-final-viral-combined_k141_108667  | [full] | 1007   | No  | NA   | 0 | 0  | Not-determined | Genome-fragment | NA              | 0     |   |
| S9-final-viral-combined_k141_40233   | [full] | 3905   | No  | NA   | 0 | 1  | Low-quality    | Genome-fragment | 2.03            | 0     |   |
| S11-final-viral-combined_k141_7294   | [full] | 3905   | No  | NA   | 0 | 2  | Low-quality    | Genome-fragment | 2.27            | 0     |   |
| S2_k141_8304                         |        | 3905   | No  | NA   | 2 | 0  | Low-quality    | Genome-fragment | 6.24            | 0     |   |
| S2-final-viral-combined_k141_20110   | [full] | 3616   | No  | NA   | 0 | 0  | Not-determined | Genome-fragment | NA              | 0     |   |
| S2-final-viral-combined_k141_171889  | [full] | 1700   | No  | NA   | 0 | 1  | Not-determined | Genome-fragment | NA              | 0     |   |
| S2-final-viral-combined_k141_212963  | [full] | 1726   | No  | NA   | 0 | 2  | Not-determined | Genome-fragment | NA              | 0     |   |
| S2-final-viral-combined_k141_140471  | [full] | 1586   | No  | NA   | 0 | 0  | Not-determined | Genome-fragment | NA              | 0     |   |
| S12-final-viral-combined_k141_72493  | [full] | 3905   | No  | NA   | 0 | 3  | Low-quality    | Genome-fragment | 1.31            | 0     |   |
| S2-final-viral-combined_k141_48617   | [full] | 2521   | No  | NA   | 0 | 2  | Not-determined | Genome-fragment | NA              | 0     |   |
| S2-final-viral-combined_k141_119629  | [full] | 1014   | No  | NA   | 0 | 0  | Not-determined | Genome-fragment | NA              | 0     |   |
| S2-final-viral-combined_k141_140475  | [full] | 2855   | No  | NA   | 0 | 2  | Not-determined | Genome-fragment | NA              | 0     |   |
| S2-final-viral-combined_k141_233822  | [full] | 1254   | No  | NA   | 0 | 0  | Not-determined | Genome-fragment | NA              | 0     |   |
| S12-final-viral-combined_k141_221792 | [full] | 3905   | No  | NA   | 3 | 1  | Low-quality    | Genome-fragment | 1.81            | 0     |   |
| S2-final-viral-combined_k141_4688    | [full] | 1123   | No  | NA   | 0 | 2  | Not-determined | Genome-fragment | NA              | 0     |   |
| S2-final-viral-combined_k141_233832  | [full] | 2027   | No  | NA   | 0 | 2  | Not-determined | Genome-fragment | NA              | 0     |   |
| S2-final-viral-combined_k141_242767  | [full] | 1719   | No  | NA   | 0 | 1  | Not-determined | Genome-fragment | NA              | 0     |   |
| S12_k141_187374                      |        | 3905   | No  | NA   | 0 | 1  | Low-quality    | Genome-fragment | 3.95            | 0     |   |
| S12_k141_131500                      |        | 3905   | No  | NA   | 0 | 1  | Low-quality    | Genome-fragment | 5.99            | 0     |   |
| S2-final-viral-combined_k141_180209  | [full] | 1378   | No  | NA   | 0 | 1  | Not-determined | Genome-fragment | NA              | 0     |   |
| S11_k141_41251                       |        | 3906   | Yes | 3331 | 6 | 1  | Low-quality    | Genome-fragment | 7.32            | 14.72 |   |
| S4_k141_152999                       |        | 3906   | No  | NA   | 1 | 0  | Low-quality    | Genome-fragment | 4.09            | 0     |   |
| S2-final-viral-combined_k141_48661   | [full] | 3829   | No  | NA   | 0 | 1  | Medium-quality | Genome-fragment | 79.05           | 0     |   |
| S2-final-viral-combined_k141_67419   | [full] | 3820   | No  | NA   | 0 | 0  | Not-determined | Genome-fragment | NA              | 0     |   |
| S2-final-viral-combined_k141_67426   | [full] | 1087   | No  | NA   | 0 | 0  | Not-determined | Genome-fragment | NA              | 0     |   |
| S2-final-viral-combined_k141_78253   | [full] | 1129   | No  | NA   | 0 | 1  | Not-determined | Genome-fragment | NA              | 0     |   |
| S8_k141_225113                       |        | 3906   | Yes | 3360 | 1 | 1  | Low-quality    | Genome-fragment | 8.76            | 13.98 |   |
| S2-final-viral-combined_k141_48662   | [full] | 4604   | No  | NA   | 0 | 1  | Not-determined | Genome-fragment | NA              | 0     |   |
| S2-final-viral-combined_k141_78262   | [full] | 2071   | No  | NA   | 0 | 1  | Not-determined | Genome-fragment | NA              | 0     |   |
| S2-final-viral-combined_k141_17643   | [full] | 2558   | No  | NA   | 0 | 1  | Not-determined | Genome-fragment | NA              | 0     |   |
| S12-final-viral-combined_k141_108031 | [full] | 3908   | No  | NA   | 0 | 1  | Low-quality    | Genome-fragment | 6.34            | 0     |   |
| S2-final-viral-combined_k141_78276   | [full] | 1051   | No  | NA   | 0 | 0  | Not-determined | Genome-fragment | NA              | 0     |   |
| S2-final-viral-combined_k141_191961  | [full] | 1168   | No  | NA   | 0 | 0  | Not-determined | Genome-fragment | NA              | 0     |   |
| S2-final-viral-combined_k141_212162  | [full] | 1855   | No  | NA   | 0 | 0  | Not-determined | Genome-fragment | NA              | 0     |   |
| S2-final-viral-combined_k141_78289   | [full] | 3954   | No  | NA   | 0 | 2  | Not-determined | Genome-fragment | NA              | 0     |   |
| S2-final-viral-combined_k141_15948   | [full] | 1885   | No  | NA   | 0 | 3  | Not-determined | Genome-fragment | NA              | 0     |   |
| S2-final-viral-combined_k141_57663   | [full] | 1130   | No  | NA   | 0 | 1  | Not-determined | Genome-fragment | NA              | 0     |   |
| S2-final-viral-combined_k141_201051  | [full] | 30077  | No  | NA   | 3 | 0  | High-quality   | Genome-fragment | 90.45           | 0     |   |
| S2_k141_214758                       |        | 3908   | No  | NA   | 0 | 2  | Low-quality    | Genome-fragment | 4.39            | 0     |   |
| S2-final-viral-combined_k141_191972  | [full] | 2043   | No  | NA   | 0 | 0  | Not-determined | Genome-fragment | NA              | 0     |   |
| S2-final-viral-combined_k141_172078  | [full] | 3802   | No  | NA   | 0 | 0  | Not-determined | Genome-fragment | NA              | 0     |   |
| S2-final-viral-combined_k141_242876  | [full] | 3935   | No  | NA   | 0 | 3  | Not-determined | Genome-fragment | NA              | 0     |   |
| S7-final-viral-combined_k141_61653   | [full] | 3911   | No  | NA   | 0 | 4  | Low-quality    | Genome-fragment | 1.3             | 0     |   |
| S8_k141_50716                        |        | 3911   | No  | NA   | 1 | 0  | Low-quality    | Genome-fragment | 4.2             | 0     |   |
| S3-final-viral-combined_k141_75905   | [full] | 3912   | No  | NA   | 0 | 2  | Low-quality    | Genome-fragment | 1.73            | 0     |   |
| S2-final-viral-combined_k141_201227  | [full] | 1357   | No  | NA   | 0 | 2  | Not-determined | Genome-fragment | NA              | 0     |   |
| S2-final-viral-combined_k141_25547   | [full] | 8336   | No  | NA   | 0 | 0  | Not-determined | Genome-fragment | NA              | 0     |   |
| S2-final-viral-combined_k141_48786   | [full] | 2425   | No  | NA   | 0 | 2  | Not-determined | Genome-fragment | NA              | 0     |   |
| S2-final-viral-combined_k141_150644  | [full] | 1064   | No  | NA   | 0 | 1  | Not-determined | Genome-fragment | NA              | 0     |   |
| S2-final-viral-combined_k141_88875   | [full] | 3355   | No  | NA   | 0 | 1  | Not-determined | Genome-fragment | NA              | 0     |   |
| S2-final-viral-combined_k141_201361  | [full] | 1873   | No  | NA   | 0 | 0  | Not-determined | Genome-fragment | NA              | 0     |   |
| S2-final-viral-combined_k141_150658  | [full] | 1075   | No  | NA   | 0 | 0  | Not-determined | Genome-fragment | NA              | 0     |   |
| S2_k141_238038                       |        | 3912   | No  | NA   | 0 | 2  | Low-quality    | Genome-fragment | 7.51            | 0     |   |
| S3-final-viral-combined_k141_116919  | [full] | 3913   | Yes | 3604 | 1 | 1  | Low-quality    | Genome-fragment | 9.69            | 7.9   |   |
| S2-final-viral-combined_k141_172092  | [full] | 8266   | No  | NA   | 0 | 3  | Not-determined | Genome-fragment | NA              | 0     |   |
| S2-final-viral-combined_k141_16036   | [full] | 1166   | No  | NA   | 0 | 2  | Not-determined | Genome-fragment | NA              | 0     |   |
| S5-final-viral-combined_k141_181983  | [full] | 3913   | Yes | 2609 | 2 | 0  | Low-quality    | Genome-fragment | 6.1             | 33.32 |   |
| S3_k141_47739                        |        | 3914   | No  | NA   | 2 | 0  | Low-quality    | Genome-fragment | 10.13           | 0     |   |
| S12-final-viral-combined_k141_359207 | [full] | 3914   | No  | NA   | 0 | 3  | Low-quality    | Genome-fragment | 3.02            | 0     |   |
| S2-final-viral-combined_k141_78386   | [full] | 2200   | No  | NA   | 0 | 1  | Not-determined | Genome-fragment | NA              | 0     |   |
| S4-final-viral-combined_k141_152156  | [full] | 3914   | No  | NA   | 0 | 0  | Low-quality    | Genome-fragment | 2.31            | 0     |   |
| S2-final-viral-combined_k141_140641  | [full] | 1881   | No  | NA   | 0 | 1  | Not-determined | Genome-fragment | NA              | 0     |   |
| S2-final-viral-combined_k141_119807  | [full] | 1132   | No  | NA   | 0 | 0  | Not-determined | Genome-fragment | NA              | 0     |   |
| S2_k141_229814                       |        | 3915   | No  | NA   | 1 | 0  | Low-quality    | Genome-fragment | 2.17            | 0     |   |
| S2-final-viral-combined_k141_233936  | [full] | 1588   | No  | NA   | 0 | 0  | Not-determined | Genome-fragment | NA              | 0     |   |
| S7-final-viral-combined_k141_48183   | [full] | 3916   | No  | NA   | 0 | 2  | Low-quality    | Genome-fragment | 6.44            | 0     |   |
| S17-k141_68643                       |        | 3916   | No  | NA   | 0 | 2  | Low-quality    | Genome-fragment | 0.67            | 0     |   |
| S8-final-viral-combined_k141_33584   | [full] | 3916   | No  | NA   | 0 | 1  | Low-quality    | Genome-fragment | 2.06            | 0     |   |
| S2-final-viral-combined_k141_4772    | [full] | 2460   | No  | NA   | 0 | 0  | Not-determined | Genome-fragment | NA              | 0     |   |
| S8_k141_261063                       |        | 3917   | No  | NA   | 0 | 1  | Low-quality    | Genome-fragment | 6.32            | 0     |   |
| S7-final-viral-combined_k141_52642   | [full] | 3918   | No  | NA   | 6 | 0  | Low-quality    | Genome-fragment | 7.59            | 0     |   |
| S17-k141_67927                       |        | 3918   | Yes | 1605 | 1 | 1  | Low-quality    | Genome-fragment | 2.72            | 59.04 |   |
| S2-final-viral-combined_k141_37171   | [full] | 2392   | No  | NA   | 0 | 0  | Not-determined | Genome-fragment | NA              | 0     |   |
| S2-final-viral-combined_k141_48914   | [full] | 2786   | No  | NA   | 0 | 1  | Not-determined | Genome-fragment | NA              | 0     |   |
| S2-final-viral-combined_k141_48929   | [full] | 1276   | No  | NA   | 0 | 2  | Not-determined | Genome-fragment | NA              | 0     |   |
| S2-final-viral-combined_k141_140700  | [full] | 1761   | No  | NA   | 0 | 0  | Not-determined | Genome-fragment | NA              | 0     |   |
| S2-final-viral-combined_k141_108909  | [full] | 2891   | No  | NA   | 0 | 1  | Not-determined | Genome-fragment | NA              | 0     |   |
| S2-final-viral-combined_k141_88973   | [full] | 3823   | No  | NA   | 0 | 3  | Not-determined | Genome-fragment | NA              | 0     |   |
| S12-final-viral-combined_k141_348571 | [full] | 3919   | No  | NA   | 1 | 0  | Low-quality    | Genome-fragment | 3.05            | 0     |   |
| S2-final-viral-combined_k141_208664  | [full] | 3919</ |     |      |   |    |                |                 |                 |       |   |



|                                      |         |        |     |    |       |    |     |                |                 |    |       |       |
|--------------------------------------|---------|--------|-----|----|-------|----|-----|----------------|-----------------|----|-------|-------|
| S17-final-viral-combined_k141_201609 | [Full]  | 3930   | Yes |    | 1628  | 1  | 1   | Low-quality    | Genome-fragment | NA | 1.32  | 58.58 |
| S2-final-viral-combined_k141_192167  | [Full]  | 1901   | No  | NA |       | 0  | 2   | Not-determined | Genome-fragment | NA | 0     | 0     |
| S2-final-viral-combined_k141_170486  | [Full]  | 3930   | No  | NA |       | 0  | 2   | Low-quality    | Genome-fragment | NA | 3.26  | 0     |
| S2-final-viral-combined_k141_120028  | [Full]  | 5178   | No  | NA |       | 0  | 3   | Not-determined | Genome-fragment | NA | 0     | 0     |
| S3-final-viral-combined_k141_122955  | [Full]  | 3931   | No  | NA |       | 0  | 0   | Low-quality    | Genome-fragment | NA | 6.82  | 0     |
| S17-k141_112294                      | [Full]  | 3931   | No  | NA |       | 1  | 0   | Low-quality    | Genome-fragment | NA | 5.33  | 0     |
| S2-final-viral-combined_k141_78578   | [Full]  | 32898  | No  | NA |       | 0  | 18  | Not-determined | Genome-fragment | NA | 0     | 0     |
| S6_k141_125554                       | [Full]  | 3932   | No  | NA |       | 0  | 3   | Low-quality    | Genome-fragment | NA | 0.76  | 0     |
| S2-final-viral-combined_k141_25646   | [Full]  | 11166  | No  | NA |       | 0  | 3   | Not-determined | Genome-fragment | NA | 0     | 0     |
| S2-final-viral-combined_k141_172422  | [Full]  | 1293   | No  | NA |       | 0  | 0   | Not-determined | Genome-fragment | NA | 0     | 0     |
| S8-final-viral-combined_k141_153883  | [Full]  | 3932   | No  | NA |       | 1  | 0   | Low-quality    | Genome-fragment | NA | 4.32  | 0     |
| S2-final-viral-combined_k141_192185  | [Full]  | 43104  | Yes |    | 18481 | 18 | 15  | Medium-quality | Genome-fragment | NA | 51.83 | 57.12 |
| S2-final-viral-combined_k141_57914   | [Full]  | 13451  | No  | NA |       | 0  | 11  | Not-determined | Genome-fragment | NA | 0     | 0     |
| S5-final-viral-combined_k141_7478    | [H2gme] | 3933   | No  | NA |       | 1  | 0   | Low-quality    | Genome-fragment | NA | 10.66 | 0     |
| S3-final-viral-combined_k141_65362   | [Full]  | 3937   | No  | NA |       | 0  | 2   | Low-quality    | Genome-fragment | NA | 1.99  | 0     |
| S2-final-viral-combined_k141_192121  | [Full]  | 1971   | No  | NA |       | 0  | 2   | Not-determined | Genome-fragment | NA | 0     | 0     |
| S2-final-viral-combined_k141_120091  | [Full]  | 1986   | No  | NA |       | 0  | 1   | Not-determined | Genome-fragment | NA | 0     | 0     |
| S12-final-viral-combined_k141_125960 | [Full]  | 3937   | No  | NA |       | 0  | 3   | Low-quality    | Genome-fragment | NA | 1.63  | 0     |
| S12_k141_170699                      | [Full]  | 2927   | No  | NA |       | 0  | 1   | Low-quality    | Genome-fragment | NA | 7.81  | 0     |
| S2-final-viral-combined_k141_172481  | [Full]  | 3764   | No  | NA |       | 0  | 2   | Not-determined | Genome-fragment | NA | 0     | 0     |
| S2-final-viral-combined_k141_14310   | [Full]  | 3937   | No  | NA |       | 1  | 0   | Low-quality    | Genome-fragment | NA | 9.59  | 0     |
| S6-final-viral-combined_k141_27573   | [Full]  | 3937   | No  | NA |       | 0  | 2   | Low-quality    | Genome-fragment | NA | 3.15  | 0     |
| S2-final-viral-combined_k141_243050  | [Full]  | 1792   | No  | NA |       | 0  | 0   | Not-determined | Genome-fragment | NA | 0     | 0     |
| S2-final-viral-combined_k141_99461   | [Full]  | 1100   | No  | NA |       | 0  | 1   | Not-determined | Genome-fragment | NA | 0     | 0     |
| S8-final-viral-combined_k141_235053  | [Full]  | 3937   | No  | NA |       | 0  | 0   | Low-quality    | Genome-fragment | NA | 7.98  | 0     |
| S2-final-viral-combined_k141_243091  | [Full]  | 2760   | No  | NA |       | 0  | 1   | Not-determined | Genome-fragment | NA | 0     | 0     |
| S2-final-viral-combined_k141_120171  | [Full]  | 7252   | No  | NA |       | 0  | 3   | Not-determined | Genome-fragment | NA | 0     | 0     |
| S2-final-viral-combined_k141_129085  | [Full]  | 1182   | No  | NA |       | 0  | 1   | Not-determined | Genome-fragment | NA | 0     | 0     |
| S2-final-viral-combined_k141_120181  | [Full]  | 2504   | No  | NA |       | 0  | 1   | Not-determined | Genome-fragment | NA | 0     | 0     |
| S1-final-viral-combined_k141_329924  | [Full]  | 3940   | Yes |    | 2614  | 2  | 1   | Low-quality    | Genome-fragment | NA | 6.6   | 33.65 |
| S2-final-viral-combined_k141_49251   | [Full]  | 6783   | No  | NA |       | 0  | 4   | Not-determined | Genome-fragment | NA | 0     | 0     |
| S17-final-viral-combined_k141_20850  | [Full]  | 3940   | No  | NA |       | 0  | 0   | Low-quality    | Genome-fragment | NA | 5.58  | 0     |
| S2-final-viral-combined_k141_172584  | [Full]  | 1255   | No  | NA |       | 0  | 1   | Not-determined | Genome-fragment | NA | 0     | 0     |
| S17-k141_250448                      | [Full]  | 3941   | No  | NA |       | 6  | 0   | Low-quality    | Genome-fragment | NA | 12.99 | 0     |
| S2-final-viral-combined_k141_120197  | [Full]  | 1895   | No  | NA |       | 0  | 2   | Not-determined | Genome-fragment | NA | 0     | 0     |
| S2-final-viral-combined_k141_25727   | [Full]  | 5787   | Yes |    | 24597 | 21 | 21  | Medium-quality | Genome-fragment | NA | 66.52 | 57.5  |
| S2-final-viral-combined_k141_160777  | [Full]  | 1514   | No  | NA |       | 0  | 2   | Not-determined | Genome-fragment | NA | 0     | 0     |
| S4-final-viral-combined_k141_93375   | [Full]  | 3941   | No  | NA |       | 0  | 0   | Low-quality    | Genome-fragment | NA | 10.45 | 0     |
| S2-final-viral-combined_k141_16288   | [Full]  | 7141   | No  | NA |       | 0  | 4   | Not-determined | Genome-fragment | NA | 0     | 0     |
| S2-final-viral-combined_k141_99542   | [Full]  | 1822   | No  | NA |       | 0  | 0   | Not-determined | Genome-fragment | NA | 0     | 0     |
| S2-final-viral-combined_k141_109217  | [Full]  | 1568   | No  | NA |       | 0  | 0   | Not-determined | Genome-fragment | NA | 0     | 0     |
| S8-final-viral-combined_k141_98989   | [Full]  | 3941   | No  | NA |       | 0  | 0   | Low-quality    | Genome-fragment | NA | 7.21  | 0     |
| S11-final-viral-combined_k141_84739  | [Full]  | 3942   | No  | NA |       | 0  | 3   | Low-quality    | Genome-fragment | NA | 1.62  | 0     |
| S2-final-viral-combined_k141_109238  | [Full]  | 1493   | No  | NA |       | 0  | 0   | Not-determined | Genome-fragment | NA | 0     | 0     |
| S2-final-viral-combined_k141_58031   | [Full]  | 2209   | No  | NA |       | 0  | 3   | Not-determined | Genome-fragment | NA | 0     | 0     |
| S2-final-viral-combined_k141_109245  | [Full]  | 6484   | No  | NA |       | 0  | 2   | Not-determined | Genome-fragment | NA | 0     | 0     |
| S2-final-viral-combined_k141_16312   | [Full]  | 1941   | No  | NA |       | 0  | 1   | Not-determined | Genome-fragment | NA | 0     | 0     |
| S2-final-viral-combined_k141_109249  | [Full]  | 1438   | No  | NA |       | 0  | 1   | Not-determined | Genome-fragment | NA | 0     | 0     |
| S11-final-viral-combined_k141_242521 | [Full]  | 3943   | No  | NA |       | 0  | 1   | Low-quality    | Genome-fragment | NA | 2.27  | 0     |
| S2-final-viral-combined_k141_78668   | [Full]  | 2360   | No  | NA |       | 0  | 2   | Not-determined | Genome-fragment | NA | 0     | 0     |
| S2-final-viral-combined_k141_89393   | [Full]  | 1124   | No  | NA |       | 0  | 2   | Not-determined | Genome-fragment | NA | 0     | 0     |
| S12-final-viral-combined_k141_134507 | [Full]  | 3942   | No  | NA |       | 0  | 2   | Not-determined | Genome-fragment | NA | 7.02  | 0     |
| S2-final-viral-combined_k141_78670   | [Full]  | 33299  | No  | NA |       | 8  | 2   | Medium-quality | Genome-fragment | NA | 72.69 | 0     |
| S2-final-viral-combined_k141_201632  | [Full]  | 1165   | No  | NA |       | 0  | 1   | Not-determined | Genome-fragment | NA | 0     | 0     |
| S2-final-viral-combined_k141_89419   | [Full]  | 2311   | No  | NA |       | 0  | 3   | Not-determined | Genome-fragment | NA | 0     | 0     |
| S1_k141_27445                        | [Full]  | 3944   | No  | NA |       | 0  | 1   | Low-quality    | Genome-fragment | NA | 10.89 | 0     |
| S2-final-viral-combined_k141_4884    | [Full]  | 4561   | No  | NA |       | 0  | 3   | Not-determined | Genome-fragment | NA | 0     | 0     |
| S2-final-viral-combined_k141_67984   | [Full]  | 8671   | No  | NA |       | 0  | 5   | Not-determined | Genome-fragment | NA | 0     | 0     |
| S2-final-viral-combined_k141_172729  | [Full]  | 6270   | No  | NA |       | 0  | 5   | Not-determined | Genome-fragment | NA | 0     | 0     |
| S6_k141_76398                        | [Full]  | 3945   | No  | NA |       | 1  | 0   | Low-quality    | Genome-fragment | NA | 9.39  | 0     |
| S8-final-viral-combined_k141_150949  | [Full]  | 3945   | Yes |    | 2193  | 1  | 1   | Low-quality    | Genome-fragment | NA | 3.55  | 44.41 |
| S2-final-viral-combined_k141_243234  | [Full]  | 1675   | No  | NA |       | 0  | 2   | Not-determined | Genome-fragment | NA | 0     | 0     |
| S7_k141_224652                       | [Full]  | 3946   | No  | NA |       | 0  | 0   | Low-quality    | Genome-fragment | NA | 6.59  | 0     |
| S2-final-viral-combined_k141_4894    | [Full]  | 4783   | No  | NA |       | 0  | 0   | Not-determined | Genome-fragment | NA | 0     | 0     |
| S2-final-viral-combined_k141_49408   | [Full]  | 1718   | No  | NA |       | 0  | 0   | Not-determined | Genome-fragment | NA | 0     | 0     |
| S2-final-viral-combined_k141_68003   | [Full]  | 1075   | No  | NA |       | 0  | 0   | Not-determined | Genome-fragment | NA | 0     | 0     |
| S17-k141_226374                      | [Full]  | 3946   | No  | NA |       | 0  | 1   | Low-quality    | Genome-fragment | NA | 7.51  | 0     |
| S2-final-viral-combined_k141_222185  | [Full]  | 1086   | No  | NA |       | 0  | 1   | Not-determined | Genome-fragment | NA | 0     | 0     |
| S11-final-viral-combined_k141_174859 | [H2gme] | 3947   | No  | NA |       | 0  | 0   | Low-quality    | Genome-fragment | NA | 6.85  | 0     |
| S3-final-viral-combined_k141_134727  | [Full]  | 3947   | No  | NA |       | 1  | 0   | Low-quality    | Genome-fragment | NA | 7.22  | 0     |
| S2-final-viral-combined_k141_16389   | [Full]  | 1958   | No  | NA |       | 0  | 1   | Not-determined | Genome-fragment | NA | 0     | 0     |
| S7-final-viral-combined_k141_201074  | [Full]  | 3947   | No  | NA |       | 0  | 0   | Low-quality    | Genome-fragment | NA | 1.76  | 0     |
| S2-final-viral-combined_k141_68033   | [Full]  | 5590   | No  | NA |       | 0  | 1   | Not-determined | Genome-fragment | NA | 0     | 0     |
| S2-final-viral-combined_k141_201691  | [Full]  | 5415   | No  | NA |       | 0  | 2   | Not-determined | Genome-fragment | NA | 0     | 0     |
| S2-final-viral-combined_k141_234407  | [Full]  | 1306   | No  | NA |       | 0  | 1   | Not-determined | Genome-fragment | NA | 0     | 0     |
| S8-final-viral-combined_k141_35288   | [Full]  | 3947   | No  | NA |       | 1  | 0   | Low-quality    | Genome-fragment | NA | 2.65  | 0     |
| S9-final-viral-combined_k141_75877   | [Full]  | 3949   | No  | NA |       | 2  | 0   | Low-quality    | Genome-fragment | NA | 8.41  | 0     |
| S1-final-viral-combined_k141_382092  | [Full]  | 3949   | No  | NA |       | 0  | 0   | Low-quality    | Genome-fragment | NA | 25.51 | 0     |
| S1_k141_9033                         | [Full]  | 3949   | No  | NA |       | 0  | 0   | Low-quality    | Genome-fragment | NA | 9.42  | 0     |
| S2-final-viral-combined_k141_68058   | [Full]  | 2094   | No  | NA |       | 0  | 0   | Not-determined | Genome-fragment | NA | 0     | 0     |
| S2-final-viral-combined_k141_58121   | [Full]  | 27276  | No  | NA |       | 0  | 16  | Medium-quality | Genome-fragment | NA | 62.68 | 0     |
| S2-final-viral-combined_k141_172851  | [Full]  | 1810   | No  | NA |       | 0  | 3   | Not-determined | Genome-fragment | NA | 0     | 0     |
| S2-final-viral-combined_k141_192398  | [Full]  | 5201   | No  | NA |       | 0  | 1   | Not-determined | Genome-fragment | NA | 0     | 0     |
| S2-final-viral-combined_k141_49506   | [Full]  | 1820   | No  | NA |       | 0  | 0   | Not-determined | Genome-fragment | NA | 0     | 0     |
| S17-final-viral-combined_k141_255759 | [Full]  | 3949   | No  | NA |       | 0  | 1   | Low-quality    | Genome-fragment | NA | 0.37  | 0     |
| S9_k141_78576                        | [Full]  | 3950   | No  | NA |       | 0  | 2   | Low-quality    | Genome-fragment | NA | 1.41  | 0     |
| S17-k141_110513                      | [Full]  | 3950   | No  | NA |       | 0  | 1   | Low-quality    | Genome-fragment | NA | 6.7   | 0     |
| S12_k141_185715                      | [Full]  | 3950   | No  | NA |       | 0  | 1   | Low-quality    | Genome-fragment | NA | 3.59  | 0     |
| S2-final-viral-combined_k141_192438  | [Full]  | 2729   | No  | NA |       | 0  | 2   | Not-determined | Genome-fragment | NA | 0     | 0     |
| S2-final-viral-combined_k141_25941   | [Full]  | 2371   | No  | NA |       | 0  | 1   | Not-determined | Genome-fragment | NA | 0     | 0     |
| S2-final-viral-combined_k141_172892  | [Full]  | 1703   | No  | NA |       | 0  | 1   | Not-determined | Genome-fragment | NA | 0     | 0     |
| S2-final-viral-combined_k141_89509   | [Full]  | 4677   | No  | NA |       | 0  | 6   | Not-determined | Genome-fragment | NA | 0     | 0     |
| S2-final-viral-combined_k141_140996  | [Full]  | 243800 | Yes |    | 52444 | 31 | 125 | Complete       | High-quality    | NA | 100   | 78.49 |
| S2-final-viral-combined_k141_4925    | [Full]  | 1511   | No  | NA |       | 0  | 1   | Not-determined | Genome-fragment | NA | 0     | 0     |
| S2-final-viral-combined_k141_151371  | [Full]  | 1691   | No  | NA |       | 0  | 1   | Not-determined | Genome-fragment | NA | 0     | 0     |
| S2-final-viral-combined_k141_172914  | [Full]  | 2094   | No  | NA |       | 0  | 1   | Not-determined | Genome-fragment | NA | 0     | 0     |
| S4_k141_6681                         | [Full]  | 3950   | No  | NA |       | 0  | 2   | Low-quality    | Genome-fragment | NA | 4.24  | 0     |
| S2-final-viral-combined_k141_25941   | [Full]  | 2276   | No  | NA |       | 0  | 0   | Not-determined | Genome-fragment | NA | 0     | 0     |
| S12_k141_265338                      | [Full]  | 3951   | No  | NA |       | 0  | 1   | Low-quality    | Genome-fragment | NA | 2.13  | 0     |
| S11-final-viral-combined_k141_89377  | [Full]  | 3952   | Yes |    | 1229  | 1  | 2   | Low-quality    | Genome-fragment | NA | 2.81  | 68.9  |
| S5-final-viral-combined_k141_170743  | [Full]  | 3952   | No  | NA |       | 0  | 1   | Low-quality    | Genome-fragment | NA | 4.81  | 0     |
| S2-final-viral-combined_k141_160969  | [Full]  | 10453  | No  | NA |       | 0  | 3   | Not-determined | Genome-fragment | NA | 0     | 0     |
| S7_k141_196585                       | [Full]  | 3953   | No  | NA |       | 0  | 2   | Low-quality    | Genome-fragment | NA | 6.54  | 0     |
| S2-final-viral-combined_k141_99775   | [Full]  | 1357   | No  | NA |       | 0  | 2   | Not-determined | Genome-fragment | NA | 0     | 0     |
| S2-final-viral-combined_k141_120331  | [Full]  | 2164   | No  | NA |       | 0  | 0   | Not-determined | Genome-fragment | NA | 0     | 0     |
| S2-final-viral-combined_k141_58210   | [Full]  | 2367   | No  | NA |       | 0  | 0   | Not-determined | Genome-fragment | NA | 0     | 0     |
| S12-final-viral-combined_k141_279970 | [Full]  | 3953   | No  | NA |       | 3  | 0   | Low-quality    | Genome-fragment | NA | 9.69  | 0     |
| S2-final-viral-combined_k141_89573   | [Full]  | 1914   | No  | NA |       | 0  | 1   | Not-determined | Genome-fragment | NA | 0     | 0     |
| S2-final-viral-combined_k141_120359  | [Full]  | 2316   | No  | NA |       | 0  | 1   | Not-determined | Genome-fragment | NA | 0     | 0     |
| S2-final-viral-combined_k141_141077  | [Full]  | 1975   | No  | NA |       | 0  | 1   | Not-determined | Genome-fragment | NA | 0     | 0     |
| S2-final-viral-combined_k141_243322  | [Full]  | 1723   | No  | NA |       | 0  | 1   | Not-determined | Genome-fragment | NA | 0     | 0     |
| S2-final-viral-combined_k141_245631  | [Full]  | 1323   | No  | NA |       | 0  | 1   | Not-determined | Genome-fragment | NA | 0     | 0     |
| S2-final-viral-combined_k141_58232   | [Full]  | 7679   | No  | NA |       | 0  | 3   | Not-determined | Genome-fragment | NA | 0     | 0     |
| S6_k141_131685                       | [Full]  | 3953   | No  | NA |       | 0  | 0   | Low-quality    | Genome-fragment | NA | 5.91  | 0     |
| S2-final-viral-combined_k141_109462  | [Full]  | 1209   | No  | NA |       | 0  | 1   | Not-determined | Genome-fragment | NA | 0     | 0     |
| S1_k141_7909                         | [Full]  | 3954   | No  | NA |       | 0  | 0   | Low-quality    | Genome-fragment | NA | 4.71  | 0     |
| S2-final-viral-combined_k141_192509  | [Full]  | 1489   | No  | NA |       | 0  | 1   | Not-determined | Genome-fragment | NA | 0     | 0     |
| S2-final-viral-combined_k141_173086  |         |        |     |    |       |    |     |                |                 |    |       |       |



|                                      |           |       |     |       |    |    |                |                 |    |       |
|--------------------------------------|-----------|-------|-----|-------|----|----|----------------|-----------------|----|-------|
| S2-final-viral-combined_k141_898251  | [full]    | 3158  | No  | NA    | 0  | 1  | Not-determined | Genome-fragment | NA | 0     |
| S2-final-viral-combined_k141_85109   | [full]    | 3967  | No  | NA    | 2  | 0  | Low-quality    | Genome-fragment | NA | 9.34  |
| S2-final-viral-combined_k141_109655  | [full]    | 1928  | No  | NA    | 0  | 0  | Not-determined | Genome-fragment | NA | 0     |
| S2-final-viral-combined_k141_68311   | [full]    | 2761  | No  | NA    | 0  | 0  | Not-determined | Genome-fragment | NA | 0     |
| S2-final-viral-combined_k141_222556  | [full]    | 3716  | No  | NA    | 0  | 1  | Not-determined | Genome-fragment | NA | 0     |
| S3-final-viral-combined_k141_104495  | [H2-gene] | 3968  | No  | NA    | 1  | 0  | Low-quality    | Genome-fragment | NA | 6.34  |
| S2-final-viral-combined_k141_109666  | [full]    | 1600  | No  | NA    | 1  | 0  | Not-determined | Genome-fragment | NA | 0     |
| S2_k141_178298                       |           | 3969  | No  | NA    | 2  | 0  | Low-quality    | Genome-fragment | NA | 3.97  |
| S4_k141_75306                        |           | 3969  | No  | NA    | 1  | 0  | Low-quality    | Genome-fragment | NA | 3.58  |
| S2-final-viral-combined_k141_141268  | [full]    | 1329  | No  | NA    | 0  | 2  | Not-determined | Genome-fragment | NA | 0     |
| S2-final-viral-combined_k141_58482   | [full]    | 11359 | No  | NA    | 0  | 7  | Not-determined | Genome-fragment | NA | 0     |
| S2-final-viral-combined_k141_151818  | [full]    | 2893  | No  | NA    | 0  | 2  | Not-determined | Genome-fragment | NA | 0     |
| S4_k141_102708                       |           | 3969  | No  | NA    | 2  | 0  | Low-quality    | Genome-fragment | NA | 5.03  |
| S2-final-viral-combined_k141_173426  | [full]    | 1757  | No  | NA    | 0  | 0  | Not-determined | Genome-fragment | NA | 0     |
| S2-final-viral-combined_k141_151847  | [full]    | 1312  | No  | NA    | 0  | 0  | Not-determined | Genome-fragment | NA | 0     |
| S8-final-viral-combined_k141_17243   | [full]    | 3970  | No  | NA    | 0  | 1  | Low-quality    | Genome-fragment | NA | 11.03 |
| S3-final-viral-combined_k141_30245   | [full]    | 3970  | No  | NA    | 0  | 3  | Low-quality    | Genome-fragment | NA | 2.34  |
| S2-final-viral-combined_k141_173446  | [full]    | 5384  | No  | NA    | 0  | 1  | Not-determined | Genome-fragment | NA | 0     |
| S2-final-viral-combined_k141_17005   | [full]    | 3211  | No  | NA    | 0  | 3  | Not-determined | Genome-fragment | NA | 0     |
| S17-final-viral-combined_k141_81496  | [full]    | 3970  | No  | NA    | 0  | 5  | Low-quality    | Genome-fragment | NA | 2.76  |
| S8-final-viral-combined_k141_175622  | [full]    | 3970  | No  | NA    | 0  | 3  | Low-quality    | Genome-fragment | NA | 2.8   |
| S12_k141_208124                      |           | 3971  | No  | NA    | 0  | 2  | Low-quality    | Genome-fragment | NA | 5.82  |
| S2-final-viral-combined_k141_234897  | [full]    | 1937  | No  | NA    | 0  | 3  | Not-determined | Genome-fragment | NA | 0     |
| S2-final-viral-combined_k141_173490  | [full]    | 2373  | No  | NA    | 0  | 2  | Not-determined | Genome-fragment | NA | 0     |
| S2-final-viral-combined_k141_26136   | [full]    | 2578  | No  | NA    | 0  | 1  | Not-determined | Genome-fragment | NA | 0     |
| S8-final-viral-combined_k141_14541   | [full]    | 3971  | No  | NA    | 0  | 1  | Low-quality    | Genome-fragment | NA | 4.86  |
| S2-final-viral-combined_k141_243479  | [full]    | 1877  | No  | NA    | 0  | 0  | Not-determined | Genome-fragment | NA | 0     |
| S2-final-viral-combined_k141_202117  | [full]    | 5713  | No  | NA    | 0  | 2  | Not-determined | Genome-fragment | NA | 0     |
| S2-final-viral-combined_k141_68414   | [full]    | 3566  | No  | NA    | 0  | 2  | Not-determined | Genome-fragment | NA | 0     |
| S2-final-viral-combined_k141_202136  | [full]    | 2279  | No  | NA    | 0  | 1  | Not-determined | Genome-fragment | NA | 0     |
| S2-final-viral-combined_k141_17046   | [full]    | 5515  | No  | NA    | 0  | 0  | Not-determined | Genome-fragment | NA | 0     |
| S2-final-viral-combined_k141_173916  | [full]    | 1512  | No  | NA    | 0  | 1  | Not-determined | Genome-fragment | NA | 0     |
| S2-final-viral-combined_k141_213082  | [full]    | 1652  | No  | NA    | 0  | 0  | Not-determined | Genome-fragment | NA | 0     |
| S1_k141_185976                       |           | 3972  | No  | NA    | 0  | 0  | Low-quality    | Genome-fragment | NA | 3.7   |
| S2-final-viral-combined_k141_100192  | [full]    | 14501 | No  | NA    | 0  | 3  | Not-determined | Genome-fragment | NA | 0     |
| S17-final-viral-combined_k141_244283 | [full]    | 3972  | No  | NA    | 0  | 1  | Low-quality    | Genome-fragment | NA | 2.87  |
| S2-final-viral-combined_k141_202192  | [full]    | 2318  | No  | NA    | 0  | 2  | Not-determined | Genome-fragment | NA | 0     |
| S2-final-viral-combined_k141_151517  | [full]    | 1123  | No  | NA    | 0  | 1  | Not-determined | Genome-fragment | NA | 0     |
| S2-final-viral-combined_k141_21313   | [full]    | 6280  | No  | NA    | 0  | 3  | Not-determined | Genome-fragment | NA | 0     |
| S17-final-viral-combined_k141_83329  | [full]    | 3972  | Yes | 1674  | 2  | 1  | Low-quality    | Genome-fragment | NA | 3.84  |
| S2-final-viral-combined_k141_17102   | [full]    | 2560  | No  | NA    | 0  | 2  | Not-determined | Genome-fragment | NA | 2.85  |
| S17-final-viral-combined_k141_97765  | [full]    | 3973  | No  | NA    | 0  | 2  | Low-quality    | Genome-fragment | NA | 2.33  |
| S12-final-viral-combined_k141_21786  | [full]    | 3973  | No  | NA    | 3  | 0  | Low-quality    | Genome-fragment | NA | 9.07  |
| S12_k141_5180                        |           | 3973  | No  | NA    | 0  | 1  | Low-quality    | Genome-fragment | NA | 5.87  |
| S2-final-viral-combined_k141_141431  | [full]    | 1156  | No  | NA    | 0  | 0  | Not-determined | Genome-fragment | NA | 0     |
| S2-final-viral-combined_k141_202244  | [full]    | 3258  | No  | NA    | 0  | 1  | Not-determined | Genome-fragment | NA | 0     |
| S2-final-viral-combined_k141_58563   | [full]    | 53508 | Yes | 27398 | 24 | 17 | Medium-quality | Genome-fragment | NA | 59.82 |
| S2-final-viral-combined_k141_17154   | [full]    | 2406  | No  | NA    | 0  | 2  | Not-determined | Genome-fragment | NA | 0     |
| S2-final-viral-combined_k141_141457  | [full]    | 1108  | No  | NA    | 0  | 0  | Not-determined | Genome-fragment | NA | 0     |
| S4-final-viral-combined_k141_105020  | [full]    | 3973  | No  | NA    | 1  | 0  | Low-quality    | Genome-fragment | NA | 2.45  |
| S2-final-viral-combined_k141_141468  | [full]    | 1104  | No  | NA    | 0  | 0  | Not-determined | Genome-fragment | NA | 0     |
| S11-final-viral-combined_k141_212323 | [full]    | 3974  | No  | NA    | 0  | 0  | Low-quality    | Genome-fragment | NA | 7.21  |
| S17-final-viral-combined_k141_219373 | [full]    | 3975  | No  | NA    | 1  | 0  | Low-quality    | Genome-fragment | NA | 31.3  |
| S8-final-viral-combined_k141_272160  | [full]    | 3975  | No  | NA    | 1  | 0  | Low-quality    | Genome-fragment | NA | 6.21  |
| S12-final-viral-combined_k141_286189 | [full]    | 3976  | No  | NA    | 2  | 0  | Low-quality    | Genome-fragment | NA | 4.23  |
| S2-final-viral-combined_k141_120973  | [full]    | 1512  | No  | NA    | 0  | 0  | Not-determined | Genome-fragment | NA | 0     |
| S7_k141_39188                        |           | 3977  | No  | NA    | 0  | 2  | Low-quality    | Genome-fragment | NA | 2.71  |
| S2-final-viral-combined_k141_202265  | [full]    | 1268  | No  | NA    | 0  | 0  | Not-determined | Genome-fragment | NA | 0     |
| S3-final-viral-combined_k141_17245   | [full]    | 3978  | No  | NA    | 0  | 1  | Low-quality    | Genome-fragment | NA | 9.56  |
| S2-final-viral-combined_k141_79120   | [full]    | 5446  | No  | NA    | 0  | 2  | Not-determined | Genome-fragment | NA | 0     |
| S2-final-viral-combined_k141_68542   | [full]    | 1871  | No  | NA    | 0  | 0  | Not-determined | Genome-fragment | NA | 0     |
| S2-final-viral-combined_k141_152013  | [full]    | 2116  | No  | NA    | 0  | 1  | Not-determined | Genome-fragment | NA | 0     |
| S2-final-viral-combined_k141_90141   | [full]    | 1555  | No  | NA    | 0  | 0  | Not-determined | Genome-fragment | NA | 0     |
| S2-final-viral-combined_k141_243647  | [full]    | 6549  | No  | NA    | 0  | 4  | Not-determined | Genome-fragment | NA | 0     |
| S2-final-viral-combined_k141_235071  | [full]    | 4167  | No  | NA    | 0  | 2  | Not-determined | Genome-fragment | NA | 0     |
| S2-final-viral-combined_k141_50216   | [full]    | 3323  | No  | NA    | 0  | 4  | Not-determined | Genome-fragment | NA | 0     |
| S4-final-viral-combined_k141_103485  | [full]    | 3978  | No  | NA    | 0  | 2  | Low-quality    | Genome-fragment | NA | 2.98  |
| S2-final-viral-combined_k141_243669  | [full]    | 6097  | No  | NA    | 0  | 5  | Not-determined | Genome-fragment | NA | 0     |
| S4_k141_36293                        |           | 3978  | No  | NA    | 0  | 1  | Low-quality    | Genome-fragment | NA | 4.05  |
| S6-final-viral-combined_k141_115664  | [full]    | 3978  | No  | NA    | 0  | 0  | Low-quality    | Genome-fragment | NA | 9.31  |
| S1-final-viral-combined_k141_156411  | [full]    | 3980  | No  | NA    | 0  | 3  | Low-quality    | Genome-fragment | NA | 0.38  |
| S2-final-viral-combined_k141_68607   | [full]    | 1914  | No  | NA    | 0  | 1  | Not-determined | Genome-fragment | NA | 0     |
| S1-final-viral-combined_k141_338965  | [full]    | 3980  | No  | NA    | 0  | 0  | Low-quality    | Genome-fragment | NA | 10.23 |
| S1_k141_55360                        |           | 3980  | No  | NA    | 0  | 1  | Low-quality    | Genome-fragment | NA | 5.6   |
| S2-final-viral-combined_k141_14924   | [full]    | 3980  | No  | NA    | 0  | 1  | Low-quality    | Genome-fragment | NA | 1.32  |
| S2-final-viral-combined_k141_68620   | [full]    | 1046  | No  | NA    | 0  | 0  | Not-determined | Genome-fragment | NA | 0     |
| S2-final-viral-combined_k141_100339  | [full]    | 4202  | No  | NA    | 0  | 3  | Not-determined | Genome-fragment | NA | 0     |
| S2-final-viral-combined_k141_68625   | [full]    | 3929  | No  | NA    | 0  | 3  | Not-determined | Genome-fragment | NA | 0     |
| S11_k141_293129                      |           | 3981  | No  | NA    | 0  | 0  | Low-quality    | Genome-fragment | NA | 5.14  |
| S12-final-viral-combined_k141_342029 | [full]    | 3981  | No  | NA    | 0  | 2  | Low-quality    | Genome-fragment | NA | 7.38  |
| S2_k141_240613                       |           | 3982  | No  | NA    | 0  | 0  | Low-quality    | Genome-fragment | NA | 9.9   |
| S2-final-viral-combined_k141_100348  | [full]    | 2021  | No  | NA    | 0  | 1  | Not-determined | Genome-fragment | NA | 0     |
| S2-final-viral-combined_k141_213219  | [full]    | 2779  | No  | NA    | 0  | 2  | Not-determined | Genome-fragment | NA | 0     |
| S2-final-viral-combined_k141_38201   | [full]    | 2106  | No  | NA    | 0  | 0  | Not-determined | Genome-fragment | NA | 0     |
| S2_k141_192175                       |           | 3983  | No  | NA    | 2  | 0  | Low-quality    | Genome-fragment | NA | 8.35  |
| S7-final-viral-combined_k141_147737  | [full]    | 3984  | No  | NA    | 1  | 0  | Low-quality    | Genome-fragment | NA | 2.87  |
| S11-final-viral-combined_k141_189912 | [full]    | 3985  | No  | NA    | 0  | 1  | Low-quality    | Genome-fragment | NA | 9.25  |
| S2-final-viral-combined_k141_100397  | [full]    | 1896  | No  | NA    | 0  | 1  | Not-determined | Genome-fragment | NA | 0     |
| S2-final-viral-combined_k141_202439  | [full]    | 1053  | No  | NA    | 0  | 0  | Not-determined | Genome-fragment | NA | 0     |
| S2-final-viral-combined_k141_183196  | [full]    | 1497  | No  | NA    | 0  | 0  | Not-determined | Genome-fragment | NA | 0     |
| S2-final-viral-combined_k141_50366   | [full]    | 1387  | No  | NA    | 0  | 1  | Not-determined | Genome-fragment | NA | 0.34  |
| S2-final-viral-combined_k141_150641  | [full]    | 3985  | Yes | 2348  | 1  | 1  | Low-quality    | Genome-fragment | NA | 1.49  |
| S2-final-viral-combined_k141_90297   | [full]    | 3345  | No  | NA    | 0  | 2  | Not-determined | Genome-fragment | NA | 0     |
| S2-final-viral-combined_k141_50378   | [full]    | 2762  | No  | NA    | 0  | 1  | Not-determined | Genome-fragment | NA | 0     |
| S2-final-viral-combined_k141_68718   | [full]    | 1250  | No  | NA    | 0  | 0  | Not-determined | Genome-fragment | NA | 0     |
| S2-final-viral-combined_k141_129885  | [full]    | 2180  | No  | NA    | 0  | 2  | Not-determined | Genome-fragment | NA | 0     |
| S17_k141_74080                       |           | 3986  | No  | NA    | 0  | 3  | Low-quality    | Genome-fragment | NA | 2.26  |
| S2-final-viral-combined_k141_130408  | [full]    | 2063  | No  | NA    | 0  | 1  | Not-determined | Genome-fragment | NA | 0     |
| S2-final-viral-combined_k141_50419   | [full]    | 3019  | No  | NA    | 0  | 3  | Not-determined | Genome-fragment | NA | 0     |
| S2-final-viral-combined_k141_50424   | [full]    | 1913  | No  | NA    | 0  | 1  | Not-determined | Genome-fragment | NA | 0     |
| S12-final-viral-combined_k141_69884  | [full]    | 3986  | No  | NA    | 0  | 0  | Low-quality    | Genome-fragment | NA | 8.12  |
| S2-final-viral-combined_k141_171701  | [full]    | 1865  | No  | NA    | 0  | 2  | Not-determined | Genome-fragment | NA | 0     |
| S2-final-viral-combined_k141_193074  | [full]    | 2456  | No  | NA    | 0  | 3  | Not-determined | Genome-fragment | NA | 0     |
| S11-final-viral-combined_k141_41031  | [full]    | 3987  | No  | NA    | 1  | 0  | Low-quality    | Genome-fragment | NA | 5.78  |
| S7_k141_240588                       |           | 3987  | No  | NA    | 0  | 0  | Low-quality    | Genome-fragment | NA | 9.4   |
| S17-final-viral-combined_k141_182180 | [full]    | 3987  | No  | NA    | 0  | 2  | Low-quality    | Genome-fragment | NA | 7.48  |
| S2-final-viral-combined_k141_129954  | [full]    | 3251  | No  | NA    | 0  | 1  | Not-determined | Genome-fragment | NA | 0     |
| S2-final-viral-combined_k141_235239  | [full]    | 3357  | No  | NA    | 0  | 1  | Not-determined | Genome-fragment | NA | 0     |
| S2-final-viral-combined_k141_152148  | [full]    | 2459  | No  | NA    | 0  | 2  | Not-determined | Genome-fragment | NA | 0     |
| S2-final-viral-combined_k141_235248  | [full]    | 2447  | No  | NA    | 0  | 2  | Not-determined | Genome-fragment | NA | 0     |
| S12_k141_1977                        |           | 3987  | Yes | 468   | 1  | 4  | Low-quality    | Genome-fragment | NA | 0.67  |
| S2-final-viral-combined_k141_50492   | [full]    | 111   | No  | NA    | 0  | 1  | Not-determined | Genome-fragment | NA | 88.26 |
| S2-final-viral-combined_k141_161610  | [full]    | 2002  | No  | NA    | 0  | 3  | Not-determined | Genome-fragment | NA | 0     |
| S2-final-viral-combined_k141_335     | [full]    | 3987  | No  | NA    | 0  | 2  | Low-quality    | Genome-fragment | NA | 4.54  |
| S2-final-viral-combined_k141_109824  | [full]    | 1962  | No  | NA    | 0  | 0  | Not-determined | Genome-fragment | NA | 0     |
| S17-final-viral-combined_k141_3436   | [full]    | 3988  | No  | NA    | 0  | 1  | Low-quality    | Genome-fragment | NA | 6.19  |
| S2-final-viral-combined_k141_245516  | [full]    | 3988  | No  | NA    | 2  | 1  | Low-quality    | Genome-fragment | NA | 7.3   |
| S17_k141_186319                      |           | 3989  | No  | NA    | 0  | 0  | Low-quality    | Genome-fragment | NA | 8.69  |
| S12-final-viral-combined_k141_119540 | [full]    | 3989  | No  | NA    | 1  | 0  | Low-quality    | Genome-fragment | NA | 0.34  |
| S2_k141_136474                       |           | 3989  | No  | NA    | 0  | 0  | Low-quality    | Genome-fragment | NA | 4.16  |
| S2-final-viral-combined_k141_17292   | [full]    | 1288  | No  | NA    | 0  | 0  | Not-determined | Genome-fragment | NA | 4.95  |
| S6-final-viral-combined_k141_80629   | [full]    | 3989  | No  | NA    | 0  | 1  | Low-quality    | Genome-fragment | NA | 0     |
| S2-final-viral-combined_k141_161651  | [full]    | 2703  | No  | NA    | 0  | 0  | Not-determined | Genome-fragment | NA | 0     |
| S9-final-viral-combined_k141_61625   | [full]    | 3990  | No  | NA    | 0  | 1  | Low-quality    | Genome-fragment | NA | 3.87  |
| S2-final-viral-combined_k141_100507  | [full]    | 4040  | No  | NA    | 0  | 2  | Not-determined | Genome-fragment | NA | 0     |
| S1-final-viral-combined_k141_310218  | [full]    | 3990  | No  | NA    | 0  | 3  | Low-quality    | Genome-fragment | NA | 2.05  |
| S2-final-viral-combined_k141_68918   | [full]    | 1489  | No  | NA    | 0  | 1  | Not-determined | Genome-fragment | NA | 0     |
| S2-final-viral-combined_k141_28404   | [full]    | 3327  | No  | NA    | 0  | 1  | Not-determined | Genome-fragment | NA | 0     |
| S2-final-viral-combined_k141_213451  | [full]    | 2415  | No  | NA    | 0  | 2  | Not-determined | Genome-fragment | NA | 0     |
| S17-final-viral-combined_k141_26300  | [full]    | 3990  | No  | NA    | 1  | 0  | Low-quality    | Genome-fragment | NA | 10.13 |
| S4-final-viral-combined_k141_108998  | [full]    | 39    |     |       |    |    |                |                 |    |       |



|                                      |            |       |    |    |                |                    |       |       |
|--------------------------------------|------------|-------|----|----|----------------|--------------------|-------|-------|
| S17-k141_627                         | 4001 No    | NA    | 0  | 1  | Low-quality    | Genome-fragment    | 13.87 | 0     |
| S1-final-viral-combined_k141_180776  | 4003 No    | NA    | 0  | 1  | Low-quality    | Genome-fragment    | 8.16  | 0     |
| S2-final-viral-combined_k141_202627  | 8554 No    | NA    | 0  | 2  | Not-determined | Genome-fragment NA | 0     | 0     |
| S2-final-viral-combined_k141_233573  | 11741 No   | NA    | 0  | 8  | Not-determined | Genome-fragment NA | 0     | 0     |
| S2-final-viral-combined_k141_121191  | 1984 No    | NA    | 0  | 2  | Not-determined | Genome-fragment NA | 0     | 0     |
| S2-final-viral-combined_k141_233159  | 1775 No    | NA    | 0  | 2  | Not-determined | Genome-fragment NA | 0     | 0     |
| S2-final-viral-combined_k141_79579   | 1872 No    | NA    | 0  | 0  | Not-determined | Genome-fragment NA | 0     | 0     |
| S12_k141_212039                      | 4003 No    | NA    | 1  | 0  | Low-quality    | Genome-fragment    | 10.11 | 0     |
| S7-final-viral-combined_k141_244459  | 4004 No    | NA    | 0  | 2  | Low-quality    | Genome-fragment    | 2.2   | 0     |
| S2-final-viral-combined_k141_213603  | 1087 No    | NA    | 0  | 0  | Not-determined | Genome-fragment NA | 0     | 0     |
| S4-final-viral-combined_k141_37778   | 4004 No    | NA    | 0  | 0  | Low-quality    | Genome-fragment    | 3.4   | 0     |
| S1-final-viral-combined_k141_237255  | 4005 No    | NA    | 0  | 1  | Low-quality    | Genome-fragment    | 6.11  | 0     |
| S2-final-viral-combined_k141_38694   | 1818 No    | NA    | 0  | 0  | Not-determined | Genome-fragment NA | 0     | 0     |
| S2-final-viral-combined_k141_141971  | 1715 No    | NA    | 0  | 1  | Not-determined | Genome-fragment NA | 0     | 0     |
| S2-final-viral-combined_k141_100845  | 1475 No    | NA    | 0  | 0  | Not-determined | Genome-fragment NA | 0     | 0     |
| S4-final-viral-combined_k141_136001  | 4005 No    | NA    | 0  | 1  | Low-quality    | Genome-fragment    | 4.7   | 0     |
| S11-final-viral-combined_k141_163738 | 4007 No    | NA    | 0  | 1  | Low-quality    | Genome-fragment    | 2.85  | 0     |
| S2-final-viral-combined_k141_50882   | 11772 No   | NA    | 0  | 8  | Not-determined | Genome-fragment NA | 0     | 0     |
| S1-final-viral-combined_k141_255571  | 4007 No    | NA    | 0  | 0  | Low-quality    | Genome-fragment    | 2.1   | 0     |
| S2-final-viral-combined_k141_110080  | 3630 No    | NA    | 0  | 1  | Not-determined | Genome-fragment NA | 0     | 0     |
| S2-final-viral-combined_k141_90557   | 1882 No    | NA    | 0  | 2  | Not-determined | Genome-fragment NA | 0     | 0     |
| S2-final-viral-combined_k141_152508  | 4720 No    | NA    | 0  | 2  | Not-determined | Genome-fragment NA | 0     | 0     |
| S2-final-viral-combined_k141_174208  | 1912 No    | NA    | 0  | 2  | Not-determined | Genome-fragment NA | 0     | 0     |
| S2-final-viral-combined_k141_5721    | 1109 No    | NA    | 0  | 0  | Not-determined | Genome-fragment NA | 0     | 0     |
| S2-final-viral-combined_k141_193425  | 2448 No    | NA    | 0  | 2  | Not-determined | Genome-fragment NA | 0     | 0     |
| S2-final-viral-combined_k141_30574   | 3056 No    | NA    | 0  | 0  | Not-determined | Genome-fragment NA | 0     | 0     |
| S3_k141_55502                        | 4007 No    | NA    | 0  | 1  | Low-quality    | Genome-fragment    | 1.84  | 0     |
| S2-final-viral-combined_k141_232340  | 1843 No    | NA    | 0  | 2  | Not-determined | Genome-fragment NA | 0     | 0     |
| S2-final-viral-combined_k141_193460  | 2896 No    | NA    | 0  | 0  | Not-determined | Genome-fragment NA | 0     | 0     |
| S2-final-viral-combined_k141_17628   | 1115 No    | NA    | 0  | 1  | Not-determined | Genome-fragment NA | 0     | 0     |
| S2-final-viral-combined_k141_235033  | 7783 No    | NA    | 0  | 9  | Not-determined | Genome-fragment NA | 0     | 0     |
| S2-final-viral-combined_k141_38805   | 1153 No    | NA    | 0  | 1  | Not-determined | Genome-fragment NA | 0     | 0     |
| S2-final-viral-combined_k141_183459  | 3277 No    | NA    | 0  | 2  | Not-determined | Genome-fragment NA | 0     | 0     |
| S9-final-viral-combined_k141_118479  | 4008 No    | NA    | 2  | 0  | Low-quality    | Genome-fragment    | 9.94  | 0     |
| S2-final-viral-combined_k141_161996  | 4008 No    | NA    | 0  | 3  | Low-quality    | Genome-fragment    | 7.21  | 0     |
| S7_k141_135982                       | 4009 No    | NA    | 0  | 2  | Low-quality    | Genome-fragment    | 4.8   | 0     |
| S17-final-viral-combined_k141_145626 | 4009 No    | NA    | 0  | 1  | Low-quality    | Genome-fragment    | 7.46  | 0     |
| S8-final-viral-combined_k141_44273   | 4009 No    | NA    | 0  | 2  | Low-quality    | Genome-fragment    | 1.21  | 0     |
| S2-final-viral-combined_k141_243868  | 28377 No   | NA    | 0  | 3  | Not-determined | Genome-fragment NA | 0     | 0     |
| S2-final-viral-combined_k141_174241  | 61290 Yes  | 44828 | 22 | 3  | Medium-quality | Genome-fragment    | 89.69 | 26.86 |
| S2-final-viral-combined_k141_59042   | 1047 No    | NA    | 0  | 0  | Not-determined | Genome-fragment NA | 0     | 0     |
| S2-final-viral-combined_k141_121463  | 1800 No    | NA    | 0  | 1  | Not-determined | Genome-fragment NA | 0     | 0     |
| S2-final-viral-combined_k141_121465  | 1382 No    | NA    | 0  | 0  | Not-determined | Genome-fragment NA | 0     | 0     |
| S7-final-viral-combined_k141_90243   | 4010 No    | NA    | 0  | 0  | Low-quality    | Genome-fragment    | 4.76  | 0     |
| S2-final-viral-combined_k141_244004  | 3120 No    | NA    | 0  | 2  | Not-determined | Genome-fragment NA | 0     | 0     |
| S17-k141_264585                      | 4010 No    | NA    | 0  | 0  | Low-quality    | Genome-fragment    | 6.22  | 0     |
| S2-final-viral-combined_k141_174272  | 2274 No    | NA    | 0  | 1  | Not-determined | Genome-fragment NA | 0     | 0     |
| S4-final-viral-combined_k141_110092  | 4010 No    | NA    | 3  | 0  | Low-quality    | Genome-fragment    | 6.56  | 0     |
| S2-final-viral-combined_k141_152605  | 2794 No    | NA    | 0  | 0  | Not-determined | Genome-fragment NA | 0     | 0     |
| S2-final-viral-combined_k141_183504  | 6935 No    | NA    | 0  | 1  | Not-determined | Genome-fragment NA | 0     | 0     |
| S4_k141_57247                        | 4010 No    | NA    | 0  | 2  | Low-quality    | Genome-fragment    | 3.04  | 0     |
| S2-final-viral-combined_k141_100951  | 1222 No    | NA    | 0  | 0  | Not-determined | Genome-fragment NA | 0     | 0     |
| S5_k141_208254                       | 4011 No    | NA    | 1  | 0  | Low-quality    | Genome-fragment    | 11.02 | 0     |
| S2-final-viral-combined_k141_59071   | 1179 No    | NA    | 0  | 1  | Not-determined | Genome-fragment NA | 0     | 0     |
| S2-final-viral-combined_k141_100954  | 2698 No    | NA    | 0  | 2  | Not-determined | Genome-fragment NA | 0     | 0     |
| S2-final-viral-combined_k141_121503  | 1040 No    | NA    | 0  | 1  | Not-determined | Genome-fragment NA | 0     | 0     |
| S2-final-viral-combined_k141_183511  | 4127 No    | NA    | 0  | 4  | Not-determined | Genome-fragment NA | 0     | 0     |
| S8_k141_148349                       | 4011 No    | NA    | 0  | 0  | Low-quality    | Genome-fragment    | 10.17 | 0     |
| S2-final-viral-combined_k141_213776  | 5450 No    | NA    | 0  | 3  | Not-determined | Genome-fragment NA | 0     | 0     |
| S2-final-viral-combined_k141_79707   | 4270 No    | NA    | 0  | 2  | Not-determined | Genome-fragment NA | 0     | 0     |
| S2_k141_177484                       | 4012 No    | NA    | 0  | 2  | Low-quality    | Genome-fragment    | 6.26  | 0     |
| S2-final-viral-combined_k141_193557  | 5470 No    | NA    | 0  | 0  | Not-determined | Genome-fragment NA | 0     | 0     |
| S2-final-viral-combined_k141_79732   | 1701 No    | NA    | 0  | 2  | Not-determined | Genome-fragment NA | 0     | 0     |
| S11_k141_283306                      | 4014 No    | NA    | 1  | 0  | Low-quality    | Genome-fragment    | 10.3  | 0     |
| S2-final-viral-combined_k141_152666  | 1275 No    | NA    | 0  | 0  | Not-determined | Genome-fragment NA | 0     | 0     |
| S2-final-viral-combined_k141_223362  | 3640 No    | NA    | 0  | 0  | Not-determined | Genome-fragment NA | 0     | 0     |
| S5_k141_107381                       | 4014 No    | NA    | 5  | 0  | Low-quality    | Genome-fragment    | 2.19  | 0     |
| S5-final-viral-combined_k141_162090  | 4015 Yes   | 3226  | 8  | 1  | Low-quality    | Genome-fragment    | 8.29  | 19.65 |
| S2-final-viral-combined_k141_235809  | 3368 No    | NA    | 1  | 0  | Not-determined | Genome-fragment NA | 0     | 0     |
| S2-final-viral-combined_k141_69282   | 1792 No    | NA    | 0  | 0  | Not-determined | Genome-fragment NA | 0     | 0     |
| S2-final-viral-combined_k141_51011   | 3148 No    | NA    | 0  | 2  | Not-determined | Genome-fragment NA | 0     | 0     |
| S7-final-viral-combined_k141_161936  | 4015 No    | NA    | 0  | 0  | Low-quality    | Genome-fragment    | 9.56  | 0     |
| S2-final-viral-combined_k141_17703   | 2835 No    | NA    | 0  | 1  | Not-determined | Genome-fragment NA | 0     | 0     |
| S2-final-viral-combined_k141_235828  | 4062 No    | NA    | 0  | 2  | Not-determined | Genome-fragment NA | 0     | 0     |
| S2-final-viral-combined_k141_100992  | 3786 No    | NA    | 0  | 3  | Not-determined | Genome-fragment NA | 0     | 0     |
| S2-final-viral-combined_k141_79788   | 2951 No    | NA    | 0  | 2  | Not-determined | Genome-fragment NA | 0     | 0     |
| S4-final-viral-combined_k141_39737   | 4016 No    | NA    | 1  | 0  | Low-quality    | Genome-fragment    | 2.07  | 0     |
| S7-final-viral-combined_k141_11473   | 4017 No    | NA    | 0  | 2  | Low-quality    | Genome-fragment    | 7.95  | 0     |
| S7-final-viral-combined_k141_16081   | 4017 No    | NA    | 0  | 0  | Low-quality    | Genome-fragment    | 1.54  | 0     |
| S2-final-viral-combined_k141_233445  | 2074 No    | NA    | 0  | 1  | Not-determined | Genome-fragment NA | 0     | 0     |
| S2-final-viral-combined_k141_110215  | 78657 Yes  | 66879 | 21 | 12 | High-quality   | High-quality       | 100   | 14.95 |
| S2-final-viral-combined_k141_177446  | 5179 No    | NA    | 0  | 3  | Not-determined | Genome-fragment NA | 0     | 0     |
| S2-final-viral-combined_k141_213824  | 7279 No    | NA    | 0  | 6  | Not-determined | Genome-fragment NA | 0     | 0     |
| S2-final-viral-combined_k141_235874  | 3519 No    | NA    | 0  | 0  | Not-determined | Genome-fragment NA | 0     | 0     |
| S2-final-viral-combined_k141_79838   | 5317 No    | NA    | 0  | 4  | Not-determined | Genome-fragment NA | 0     | 0     |
| S2-final-viral-combined_k141_69362   | 6690 No    | NA    | 0  | 3  | Not-determined | Genome-fragment NA | 0     | 0     |
| S2-final-viral-combined_k141_38922   | 3902 No    | NA    | 0  | 3  | Not-determined | Genome-fragment NA | 0     | 0     |
| S2-final-viral-combined_k141_167080  | 4018 No    | NA    | 3  | 0  | Low-quality    | Genome-fragment    | 10.3  | 0     |
| S2-final-viral-combined_k141_235801  | 1549 No    | NA    | 0  | 2  | Not-determined | Genome-fragment NA | 0     | 0     |
| S2-final-viral-combined_k141_69390   | 2720 No    | NA    | 0  | 1  | Not-determined | Genome-fragment NA | 0     | 0     |
| S2-final-viral-combined_k141_69396   | 1004 No    | NA    | 0  | 1  | Not-determined | Genome-fragment NA | 0     | 0     |
| S8-final-viral-combined_k141_161901  | 4020 No    | NA    | 0  | 0  | Low-quality    | Genome-fragment    | 2.9   | 0     |
| S2-final-viral-combined_k141_5791    | 143252 Yes | 30986 | 14 | 69 | Medium-quality | Genome-fragment    | 59.4  | 78.37 |
| S2-final-viral-combined_k141_193717  | 1345 No    | NA    | 0  | 0  | Not-determined | Genome-fragment NA | 0     | 0     |
| S2-final-viral-combined_k141_235975  | 2411 No    | NA    | 0  | 0  | Not-determined | Genome-fragment NA | 0     | 0     |
| S2-final-viral-combined_k141_244177  | 3479 No    | NA    | 0  | 0  | Not-determined | Genome-fragment NA | 0     | 0     |
| S9_k141_63772                        | 4023 No    | NA    | 0  | 0  | Low-quality    | Genome-fragment    | 9.99  | 0     |
| S2-final-viral-combined_k141_192719  | 10475 No   | NA    | 0  | 2  | Not-determined | Genome-fragment NA | 0     | 0     |
| S5-final-viral-combined_k141_85112   | 4023 No    | NA    | 0  | 1  | Low-quality    | Genome-fragment    | 1.79  | 0     |
| S2-final-viral-combined_k141_161940  | 2243 No    | NA    | 0  | 1  | Not-determined | Genome-fragment NA | 0     | 0     |
| S2-final-viral-combined_k141_235953  | 5087 No    | NA    | 0  | 1  | Not-determined | Genome-fragment NA | 0     | 0     |
| S17-final-viral-combined_k141_371571 | 4023 No    | NA    | 0  | 0  | Low-quality    | Genome-fragment    | 10.08 | 0     |
| S2-final-viral-combined_k141_09474   | 1063 No    | NA    | 0  | 1  | Not-determined | Genome-fragment NA | 0     | 0     |
| S2-final-viral-combined_k141_193748  | 3020 No    | NA    | 0  | 0  | Not-determined | Genome-fragment NA | 0     | 0     |
| S2-final-viral-combined_k141_233527  | 5479 No    | NA    | 0  | 5  | Not-determined | Genome-fragment NA | 0     | 0     |
| S11-final-viral-combined_k141_121447 | 4024 No    | NA    | 0  | 1  | Low-quality    | Genome-fragment    | 5.35  | 0     |
| S2-final-viral-combined_k141_203031  | 3641 No    | NA    | 0  | 1  | Not-determined | Genome-fragment NA | 0     | 0     |
| S2-final-viral-combined_k141_90670   | 2055 No    | NA    | 0  | 0  | Not-determined | Genome-fragment NA | 0     | 0     |
| S2-final-viral-combined_k141_26642   | 2382 No    | NA    | 0  | 16 | Not-determined | Genome-fragment NA | 0     | 0     |
| S2-final-viral-combined_k141_79863   | 3259 No    | NA    | 0  | 0  | Not-determined | Genome-fragment NA | 0     | 0     |
| S2-final-viral-combined_k141_152757  | 2267 No    | NA    | 0  | 1  | Not-determined | Genome-fragment NA | 0     | 0     |
| S12_k141_371834                      | 4024 No    | NA    | 0  | 1  | Low-quality    | Genome-fragment    | 1.49  | 0     |
| S8_k141_5883                         | 4025 No    | NA    | 0  | 0  | Low-quality    | Genome-fragment    | 3.27  | 0     |
| S2-final-viral-combined_k141_236030  | 4001 No    | NA    | 0  | 0  | Not-determined | Genome-fragment NA | 0     | 0     |
| S2-final-viral-combined_k141_160861  | 4026 No    | NA    | 0  | 0  | Low-quality    | Genome-fragment    | 8.67  | 0     |
| S2-final-viral-combined_k141_193830  | 2739 No    | NA    | 0  | 2  | Not-determined | Genome-fragment NA | 0     | 0     |
| S12_k141_24807                       | 4026 No    | NA    | 0  | 2  | Low-quality    | Genome-fragment    | 2.03  | 0     |
| S2-final-viral-combined_k141_142260  | 7282 No    | NA    | 0  | 2  | Not-determined | Genome-fragment NA | 0     | 0     |
| S2-final-viral-combined_k141_236061  | 7787 No    | NA    | 0  | 0  | Not-determined | Genome-fragment NA | 0     | 0     |
| S2-final-viral-combined_k141_38538   | 4026 No    | NA    | 2  | 0  | Low-quality    | Genome-fragment    | 12.19 | 0     |
| S2-final-viral-combined_k141_130454  | 3649 No    | NA    | 0  | 3  | Not-determined | Genome-fragment NA | 0     | 0     |
| S2-final-viral-combined_k141_236051  | 2747 No    | NA    | 0  | 0  | Not-determined | Genome-fragment NA | 0     | 0     |
| S2-final-viral-combined_k141_51227   | 1296 No    | NA    | 0  | 0  | Not-determined | Genome-fragment NA | 0     | 0     |
| S2-final-viral-combined_k141_39079   | 4255 No    | NA    | 0  | 2  | Not-determined | Genome-fragment NA | 0     | 0     |
| S2-final-viral-combined_k141_130464  | 3368 No    | NA    | 0  | 1  | Not-determined | Genome-fragment NA | 0     | 0     |
| S8_k141_24268                        | 4026 No    | NA    | 0  | 1  | Low-quality    | Genome-fragment    | 6.29  | 0     |
| S11-final-viral-combined_k141_253245 | 4027 No    | NA    | 1  | 0  | Low-quality    | Genome-fragment    | 7.48  | 0     |
| S7_k141_175287                       | 4027 No    | NA    | 0  | 0  | Low-quality    | Genome-fragment    | 1.74  | 0     |
| S2-final-viral-combined_k141_39099   | 2422 No    | NA    | 0  | 0  | Not-determined | Genome-fragment NA | 0     | 0     |
| S17-final-viral-combined_k141_228639 | 4027 No    | NA    | 0  | 0  | Low-quality    | Genome-fragment    | 4.89  | 0     |
| S2-final-viral-combined_k141_130507  | 3662 No    | NA    | 0  | 2  | Not-determined | Genome-fragment NA | 0     | 0     |
| S2-final-viral-combined_k141_30764   | 2142 No    | NA    | 0  | 0  | Not-determined | Genome-fragment NA | 0     | 0     |
| S2-final-viral-combined_k141_51271   | 3473 No    | NA    | 0  | 3  | Not-determined | Genome-fragment NA | 0     | 0     |
| S2-final-viral-combined_k141_59414   | 4101 No    | NA    | 0  | 5  | Not-determined | Genome-fragment NA | 0     | 0     |
| S17-final-viral-combined_k141_250348 | 4027 No    | NA    | 4  | 0  | Low-quality    | Genome-fragment    | 12.45 | 0     |
| S2-final-viral-combined_k141_90768   | 8702 No    | NA    | 0  | 1  | Not-determined | Genome-fragment NA | 0     | 0     |
| S5-final-viral-combined_k141_85750   | 4028 No    | NA    | 0  | 0  | Low-quality    | Genome-fragment    | 2.85  | 0     |
| S2-final-viral-combined_k141_174491  | 1877 No    | NA    | 0  | 1  | Not-determined | Genome-fragment NA | 0     | 0     |
| S2-final-viral-combined_k141_183818  | 6078 No    | NA    | 0  | 2  | Not-determined | Genome-fragment NA | 0     | 0     |
| S2-final-viral-combined_k141_174502  | 4173 No    | NA    | 0  | 5  | Not-determined | Genome-fragment NA | 0     | 0     |
| S2-final-viral-combined_k141_236081  | 2393 No    | NA    | 0  | 1  | Not-determined | Genome-fragment NA | 0     | 0     |
| S2-final-viral-combined_k141_183859  | 4484 No    | NA    | 0  | 0  | Not-determined | Genome-fragment NA | 0     | 0     |
| S2-final-viral-combined_k141_152960  | 1002 No    | NA    | 0  | 0  | Not-determined | Genome-fragment NA | 0     | 0     |
| S2-final-viral-combined_k141_152968  | 2342 No    | NA    | 0  | 0  | Not-determined | Genome-fragment NA | 0     | 0     |
| S2-final-viral-combined_k141_79966   |            |       |    |    |                |                    |       |       |



|                                      |            |       |     |       |    |    |                |                 |                 |       |       |
|--------------------------------------|------------|-------|-----|-------|----|----|----------------|-----------------|-----------------|-------|-------|
| S2-final-viral-combined_k141_162091  | [full]     | 5089  | No  | NA    | 0  | 0  | Not-determined | Genome-fragment | NA              |       | 0     |
| S9-final-viral-combined_k141_24248   | [full]     | 4039  | No  | NA    | 0  | 1  | Low-quality    | Genome-fragment | NA              | 1.15  | 0     |
| S1-final-viral-combined_k141_229640  | [full]     | 4039  | No  | NA    | 0  | 1  | Low-quality    | Genome-fragment | NA              | 3.81  | 0     |
| S2-final-viral-combined_k141_110548  | [full]     | 1261  | No  | NA    | 0  | 0  | Not-determined | Genome-fragment | NA              |       | 0     |
| S2-final-viral-combined_k141_184039  | [full]     | 5336  | No  | NA    | 0  | 0  | Not-determined | Genome-fragment | NA              |       | 0     |
| S17_k141_234669                      | [full]     | 4039  | No  | NA    | 1  | 0  | Low-quality    | Genome-fragment | NA              | 4.81  | 0     |
| S2-final-viral-combined_k141_110549  | [full]     | 3491  | No  | NA    | 0  | 1  | Not-determined | Genome-fragment | NA              |       | 0     |
| S12-final-viral-combined_k141_321077 | [full]     | 4039  | No  | NA    | 0  | 3  | Low-quality    | Genome-fragment | NA              | 8.68  | 0     |
| S2-final-viral-combined_k141_60651   | [full]     | 2336  | No  | NA    | 0  | 0  | Not-determined | Genome-fragment | NA              | 0     | 0     |
| S2-final-viral-combined_k141_18055   | [full]     | 2207  | No  | NA    | 0  | 0  | Not-determined | Genome-fragment | NA              |       | 0     |
| S2-final-viral-combined_k141_236201  | [full]     | 2374  | No  | NA    | 0  | 1  | Not-determined | Genome-fragment | NA              |       | 0     |
| S17-final-viral-combined_k141_28068  | [full]     | 4040  | No  | NA    | 0  | 0  | Low-quality    | Genome-fragment | NA              | 3.13  | 0     |
| S1_k141_195455                       |            | 4042  | No  | NA    | 0  | 1  | Low-quality    | Genome-fragment | NA              | 6.91  | 0     |
| S12-final-viral-combined_k141_151862 | [full]     | 4042  | No  | NA    | 3  | 0  | Low-quality    | Genome-fragment | NA              | 8.6   | 0     |
| S2-final-viral-combined_k141_110592  | [full]     | 1488  | No  | NA    | 0  | 2  | Not-determined | Genome-fragment | NA              |       | 0     |
| S2-final-viral-combined_k141_5014    | [full]     | 4042  | Yes | 3030  | 0  | 0  | Not-determined | Genome-fragment | NA              | 1.82  | 23.04 |
| S2-final-viral-combined_k141_184119  | [full]     | 2728  | No  | NA    | 1  | 0  | Not-determined | Genome-fragment | NA              |       | 0     |
| S2-final-viral-combined_k141_211890  | [full]     | 1327  | No  | NA    | 0  | 1  | Not-determined | Genome-fragment | NA              |       | 0     |
| S2-final-viral-combined_k141_214532  | [full]     | 1420  | No  | NA    | 0  | 1  | Not-determined | Genome-fragment | NA              |       | 0     |
| S1-final-viral-combined_k141_345092  | [full]     | 14044 | No  | NA    | 4  | 0  | Low-quality    | Genome-fragment | NA              | 12.67 | 0     |
| S1_k141_388587                       |            | 4044  | No  | NA    | 1  | 0  | Low-quality    | Genome-fragment | NA              | 11.49 | 0     |
| S6-final-viral-combined_k141_549516  | [full]     | 4045  | No  | NA    | 1  | 3  | Low-quality    | Genome-fragment | NA              | 9.25  | 0     |
| S2-final-viral-combined_k141_51446   | [full]     | 8622  | No  | NA    | 3  | 0  | Medium-quality | Genome-fragment | NA              | 64.37 | 0     |
| S6-final-viral-combined_k141_139467  | [full]     | 4045  | No  | NA    | 0  | 2  | Low-quality    | Genome-fragment | NA              | 2.27  | 0     |
| S2-final-viral-combined_k141_51451   | [full]     | 1270  | No  | NA    | 0  | 1  | Not-determined | Genome-fragment | NA              |       | 0     |
| S2-final-viral-combined_k141_1424031 | [full]     | 2336  | No  | NA    | 0  | 0  | Not-determined | Genome-fragment | NA              |       | 0     |
| S12-final-viral-combined_k141_80269  | [full]     | 4046  | No  | NA    | 0  | 3  | Low-quality    | Genome-fragment | NA              | 0.61  | 0     |
| S9-final-viral-combined_k141_83339   | [full]     | 4047  | No  | NA    | 0  | 3  | Low-quality    | Genome-fragment | NA              | 3.94  | 0     |
| S2-final-viral-combined_k141_174793  | [full]     | 1207  | No  | NA    | 0  | 2  | Not-determined | Genome-fragment | NA              | 0     | 0     |
| S2-final-viral-combined_k141_110619  | [full]     | 1393  | No  | NA    | 0  | 1  | Not-determined | Genome-fragment | NA              |       | 0     |
| S2-final-viral-combined_k141_214275  | [full]     | 1177  | No  | NA    | 0  | 1  | Not-determined | Genome-fragment | NA              |       | 0     |
| S2-final-viral-combined_k141_184384  | [full]     | 4047  | No  | NA    | 1  | 0  | Low-quality    | Genome-fragment | NA              | 5.01  | 0     |
| S2_k141_50603                        |            | 4050  | No  | NA    | 0  | 2  | Low-quality    | Genome-fragment | NA              | 2.69  | 0     |
| S2-final-viral-combined_k141_214294  | [full]     | 1036  | No  | NA    | 0  | 0  | Not-determined | Genome-fragment | NA              |       | 0     |
| S2-final-viral-combined_k141_236292  | [full]     | 1657  | No  | NA    | 0  | 0  | Not-determined | Genome-fragment | NA              |       | 0     |
| S4_k141_104441                       |            | 4050  | No  | NA    | 0  | 1  | Low-quality    | Genome-fragment | NA              | 6.82  | 0     |
| S2-final-viral-combined_k141_130761  | [full]     | 1775  | No  | NA    | 0  | 1  | Not-determined | Genome-fragment | NA              |       | 0     |
| S9-final-viral-combined_k141_81241   | [full]     | 4051  | No  | NA    | 2  | 0  | Low-quality    | Genome-fragment | NA              | 8.94  | 0     |
| S1-final-viral-combined_k141_56592   | [full]     | 4051  | No  | NA    | 5  | 0  | Low-quality    | Genome-fragment | NA              | 9.55  | 0     |
| S11-final-viral-combined_k141_260540 | [full]     | 4052  | No  | NA    | 0  | 2  | Low-quality    | Genome-fragment | NA              | 2.46  | 0     |
| S12-final-viral-combined_k141_66382  | [R2genome] | 4052  | No  | NA    | 1  | 0  | Low-quality    | Genome-fragment | NA              | 2.2   | 0     |
| S2-final-viral-combined_k141_104680  | [full]     | 4052  | Yes | 3363  | 1  | 1  | Low-quality    | Genome-fragment | NA              | 0.95  | 17    |
| S2-final-viral-combined_k141_236319  | [full]     | 10139 | No  | NA    | 0  | 2  | Not-determined | Genome-fragment | NA              |       | 0     |
| S2-final-viral-combined_k141_6205    | [full]     | 1336  | No  | NA    | 0  | 0  | Not-determined | Genome-fragment | NA              |       | 0     |
| S11_k141_96702                       |            | 4053  | No  | NA    | 0  | 1  | Low-quality    | Genome-fragment | NA              | 12.49 | 0     |
| S2-final-viral-combined_k141_6220    | [full]     | 6280  | No  | NA    | 0  | 0  | Not-determined | Genome-fragment | NA              |       | 0     |
| S2-final-viral-combined_k141_194183  | [full]     | 2265  | No  | NA    | 0  | 2  | Not-determined | Genome-fragment | NA              |       | 0     |
| S2-final-viral-combined_k141_39529   | [full]     | 2557  | No  | NA    | 0  | 2  | Not-determined | Genome-fragment | NA              |       | 0     |
| S1-final-viral-combined_k141_159741  | [full]     | 2973  | No  | NA    | 1  | 0  | Low-quality    | Genome-fragment | NA              | 9.37  | 0     |
| S2-final-viral-combined_k141_130874  | [full]     | 2961  | No  | NA    | 0  | 3  | Not-determined | Genome-fragment | NA              |       | 0     |
| S8-final-viral-combined_k141_27999   | [full]     | 4054  | No  | NA    | 0  | 2  | Low-quality    | Genome-fragment | NA              | 2.15  | 0     |
| S2-final-viral-combined_k141_22392   | [full]     | 1157  | No  | NA    | 0  | 2  | Not-determined | Genome-fragment | NA              | 0     | 0     |
| S2-final-viral-combined_k141_130888  | [full]     | 2602  | No  | NA    | 0  | 1  | Not-determined | Genome-fragment | NA              |       | 0     |
| S2-final-viral-combined_k141_194228  | [full]     | 1699  | No  | NA    | 0  | 2  | Not-determined | Genome-fragment | NA              |       | 0     |
| S11-final-viral-combined_k141_255838 | [full]     | 4055  | No  | NA    | 2  | 2  | Low-quality    | Genome-fragment | NA              | 8.65  | 0     |
| S1-final-viral-combined_k141_189442  | [full]     | 4055  | No  | NA    | 3  | 0  | Low-quality    | Genome-fragment | NA              | 6.82  | 0     |
| S2-final-viral-combined_k141_184409  | [full]     | 2294  | No  | NA    | 0  | 0  | Not-determined | Genome-fragment | NA              |       | 0     |
| S2-final-viral-combined_k141_223937  | [full]     | 1773  | No  | NA    | 0  | 2  | Not-determined | Genome-fragment | NA              |       | 0     |
| S2-final-viral-combined_k141_236400  | [full]     | 2973  | No  | NA    | 0  | 0  | Not-determined | Genome-fragment | NA              |       | 0     |
| S12-final-viral-combined_k141_142017 | [full]     | 4056  | No  | NA    | 0  | 2  | Low-quality    | Genome-fragment | NA              | 2.79  | 0     |
| S2-final-viral-combined_k141_51577   | [full]     | 3151  | No  | NA    | 0  | 3  | Not-determined | Genome-fragment | NA              | 2.05  | 0     |
| S7-final-viral-combined_k141_237481  | [full]     | 4057  | No  | NA    | 0  | 2  | Low-quality    | Genome-fragment | NA              |       | 0     |
| S2-final-viral-combined_k141_59767   | [full]     | 1320  | No  | NA    | 0  | 0  | Not-determined | Genome-fragment | NA              |       | 0     |
| S17-final-viral-combined_k141_248903 | [full]     | 4057  | No  | NA    | 0  | 2  | Low-quality    | Genome-fragment | NA              | 8.83  | 0     |
| S2-final-viral-combined_k141_91177   | [full]     | 3067  | No  | NA    | 0  | 3  | Not-determined | Genome-fragment | NA              |       | 0     |
| S2-final-viral-combined_k141_51586   | [full]     | 9411  | No  | NA    | 0  | 0  | Not-determined | Genome-fragment | NA              |       | 0     |
| S2-final-viral-combined_k141_80179   | [full]     | 3928  | No  | NA    | 0  | 2  | Not-determined | Genome-fragment | NA              |       | 0     |
| S2-final-viral-combined_k141_91189   | [full]     | 1714  | No  | NA    | 0  | 0  | Not-determined | Genome-fragment | NA              |       | 0     |
| S2-final-viral-combined_k141_184430  | [full]     | 15780 | No  | NA    | 10 | 0  | Not-determined | Genome-fragment | NA              |       | 0     |
| S2-final-viral-combined_k141_168888  | [full]     | 4058  | No  | NA    | 2  | 0  | Low-quality    | Genome-fragment | NA              | 9.58  | 0     |
| S2-final-viral-combined_k141_80204   | [full]     | 2007  | No  | NA    | 0  | 2  | Not-determined | Genome-fragment | NA              |       | 0     |
| S2-final-viral-combined_k141_69977   | [full]     | 2456  | No  | NA    | 0  | 2  | Not-determined | Genome-fragment | NA              |       | 0     |
| S1-final-viral-combined_k141_74342   | [full]     | 4059  | No  | NA    | 1  | 0  | Low-quality    | Genome-fragment | NA              | 9.25  | 0     |
| S2-final-viral-combined_k141_6301    | [full]     | 1141  | No  | NA    | 0  | 1  | Not-determined | Genome-fragment | NA              |       | 0     |
| S2_k141_244030                       |            | 4059  | No  | NA    | 5  | 0  | Low-quality    | Genome-fragment | NA              | 9.61  | 0     |
| S2-final-viral-combined_k141_27032   | [full]     | 1691  | No  | NA    | 0  | 2  | Not-determined | Genome-fragment | NA              |       | 0     |
| S11_k141_236885                      |            | 4060  | No  | NA    | 1  | 0  | Low-quality    | Genome-fragment | NA              | 10.34 | 0     |
| S2-final-viral-combined_k141_51604   | [full]     | 17451 | No  | NA    | 0  | 12 | Not-determined | Genome-fragment | NA              |       | 0     |
| S2-final-viral-combined_k141_6311    | [full]     | 1116  | No  | NA    | 0  | 1  | Not-determined | Genome-fragment | NA              |       | 0     |
| S2-final-viral-combined_k141_18347   | [full]     | 2096  | No  | NA    | 0  | 1  | Not-determined | Genome-fragment | NA              |       | 0     |
| S1-final-viral-combined_k141_66520   | [full]     | 4060  | No  | NA    | 1  | 0  | Low-quality    | Genome-fragment | NA              | 2.93  | 0     |
| S2-final-viral-combined_k141_1426501 | [full]     | 24175 | No  | NA    | 0  | 4  | Not-determined | Genome-fragment | NA              | 0     | 0     |
| S11-final-viral-combined_k141_155445 | [full]     | 4061  | No  | NA    | 2  | 0  | Low-quality    | Genome-fragment | NA              | 9.3   | 0     |
| S2-final-viral-combined_k141_18361   | [full]     | 1264  | No  | NA    | 0  | 2  | Not-determined | Genome-fragment | NA              |       | 0     |
| S2-final-viral-combined_k141_142661  | [full]     | 5527  | No  | NA    | 0  | 2  | Not-determined | Genome-fragment | NA              |       | 0     |
| S2-final-viral-combined_k141_110778  | [full]     | 2099  | No  | NA    | 0  | 2  | Not-determined | Genome-fragment | NA              |       | 0     |
| S2-final-viral-combined_k141_70047   | [full]     | 1396  | No  | NA    | 0  | 0  | Not-determined | Genome-fragment | NA              |       | 0     |
| S2-final-viral-combined_k141_70060   | [full]     | 2709  | No  | NA    | 0  | 2  | Not-determined | Genome-fragment | NA              |       | 0     |
| S2-final-viral-combined_k141_162396  | [full]     | 1861  | No  | NA    | 0  | 2  | Not-determined | Genome-fragment | NA              |       | 0     |
| S2-final-viral-combined_k141_101751  | [full]     | 2846  | No  | NA    | 0  | 1  | Not-determined | Genome-fragment | NA              |       | 0     |
| S1_k141_186326                       |            | 4061  | No  | NA    | 0  | 0  | Low-quality    | Genome-fragment | NA              | 11.35 | 0     |
| S12-final-viral-combined_k141_257400 | [full]     | 4061  | No  | NA    | 0  | 0  | Low-quality    | Genome-fragment | NA              | 4.08  | 0     |
| S2-final-viral-combined_k141_93974   | [full]     | 4062  | No  | NA    | 0  | 1  | Low-quality    | Genome-fragment | NA              | 3.34  | 0     |
| S2-final-viral-combined_k141_26489   | [full]     | 5863  | No  | NA    | 0  | 3  | Not-determined | Genome-fragment | NA              |       | 0     |
| S11_k141_204910                      |            | 4063  | No  | NA    | 0  | 0  | Low-quality    | Genome-fragment | NA              | 9.19  | 0     |
| S2-final-viral-combined_k141_194352  | [full]     | 2410  | No  | NA    | 0  | 2  | Not-determined | Genome-fragment | NA              |       | 0     |
| S2-final-viral-combined_k141_80279   | [full]     | 1483  | No  | NA    | 0  | 1  | Not-determined | Genome-fragment | NA              |       | 0     |
| S2-final-viral-combined_k141_224016  | [full]     | 1082  | No  | NA    | 0  | 1  | Not-determined | Genome-fragment | NA              |       | 0     |
| S3_k141_1214                         |            | 4063  | No  | NA    | 7  | 0  | Low-quality    | Genome-fragment | NA              | 11.09 | 0     |
| S2-final-viral-combined_k141_80298   | [full]     | 1759  | No  | NA    | 0  | 2  | Not-determined | Genome-fragment | NA              |       | 0     |
| S1-final-viral-combined_k141_124486  | [full]     | 4064  | No  | NA    | 0  | 2  | Low-quality    | Genome-fragment | NA              | 2.94  | 0     |
| S2-final-viral-combined_k141_122248  | [full]     | 5019  | No  | NA    | 0  | 1  | Not-determined | Genome-fragment | NA              |       | 0     |
| S2-final-viral-combined_k141_39752   | [full]     | 2110  | No  | NA    | 0  | 0  | Not-determined | Genome-fragment | NA              |       | 0     |
| S4_k141_140003                       |            | 4065  | No  | NA    | 0  | 1  | Low-quality    | Genome-fragment | NA              | 4.84  | 0     |
| S8-final-viral-combined_k141_130411  | [full]     | 4065  | No  | NA    | 0  | 2  | Low-quality    | Genome-fragment | NA              | 4.64  | 0     |
| S12_k141_182631                      |            | 4067  | No  | NA    | 1  | 0  | Low-quality    | Genome-fragment | NA              | 6.25  | 0     |
| S2-final-viral-combined_k141_224043  | [full]     | 7151  | No  | NA    | 0  | 4  | Not-determined | Genome-fragment | NA              |       | 0     |
| S1_k141_49560                        |            | 4068  | No  | NA    | 4  | 0  | Low-quality    | Genome-fragment | NA              | 10.09 | 0     |
| S2-final-viral-combined_k141_194389  | [full]     | 1845  | No  | NA    | 0  | 0  | Not-determined | Genome-fragment | NA              |       | 0     |
| S2-final-viral-combined_k141_110853  | [full]     | 1066  | No  | NA    | 0  | 0  | Not-determined | Genome-fragment | NA              |       | 0     |
| S2-final-viral-combined_k141_91308   | [full]     | 4478  | No  | NA    | 0  | 6  | Not-determined | Genome-fragment | NA              |       | 0     |
| S2-final-viral-combined_k141_6360    | [full]     | 1308  | No  | NA    | 0  | 1  | Not-determined | Genome-fragment | NA              |       | 0     |
| S2-final-viral-combined_k141_122300  | [full]     | 2860  | No  | NA    | 0  | 0  | Not-determined | Genome-fragment | NA              |       | 0     |
| S7-final-viral-combined_k141_225489  | [full]     | 4069  | No  | NA    | 0  | 3  | Low-quality    | Genome-fragment | NA              | 2.85  | 0     |
| S2-final-viral-combined_k141_91311   | [full]     | 1218  | No  | NA    | 0  | 1  | Not-determined | Genome-fragment | NA              | 0     | 0     |
| S2-final-viral-combined_k141_122332  | [full]     | 2670  | No  | NA    | 0  | 3  | Not-determined | Genome-fragment | NA              |       | 0     |
| S2-final-viral-combined_k141_101826  | [full]     | 62201 | Yes | 26132 | 19 | 16 | Complete       | High-quality    | Genome-fragment | 100   | 57.99 |
| S2_k141_118805                       |            | 4069  | No  | NA    | 1  | 0  | Low-quality    | Genome-fragment | NA              | 10.1  | 0     |
| S2-final-viral-combined_k141_101829  | [full]     | 3193  | No  | NA    | 0  | 0  | Not-determined | Genome-fragment | NA              |       | 0     |
| S6_k141_16444                        |            | 4069  | No  | NA    | 0  | 3  | Low-quality    | Genome-fragment | NA              | 9.68  | 0     |
| S2-final-viral-combined_k141_175387  | [full]     | 2545  | No  | NA    | 0  | 3  | Not-determined | Genome-fragment | NA              |       | 0     |
| S2-final-viral-combined_k141_162517  | [full]     | 2749  | No  | NA    | 0  | 2  | Not-determined | Genome-fragment | NA              |       | 0     |
| S2-final-viral-combined_k141_236594  | [full]     | 1615  | No  | NA    | 0  | 0  | Not-determined | Genome-fragment | NA              |       | 0     |
| S7_k141_179225                       |            | 4071  | No  | NA    | 0  | 4  | Low-quality    | Genome-fragment | NA              | 0.98  |       |



|                                              |       |     |      |    |    |                |                 |       |       |
|----------------------------------------------|-------|-----|------|----|----|----------------|-----------------|-------|-------|
| 51_k141_70132                                | 4082  | No  | NA   | 2  | 0  | Low-quality    | Genome-fragment | 8.85  | 0     |
| 52-final-viral-combined_k141_143041 full     | 1455  | No  | NA   | 0  | 0  | Not-determined | Genome-fragment | NA    | 0     |
| 517-final-viral-combined_k141_206298 full    | 4082  | Yes | 1401 | 1  | 1  | Low-quality    | Genome-fragment | 3.89  | 65.68 |
| 52-final-viral-combined_k141_6494 full       | 1624  | No  | NA   | 0  | 0  | Not-determined | Genome-fragment | NA    | 0     |
| 57-final-viral-combined_k141_209123 full     | 4083  | No  | NA   | 0  | 2  | Low-quality    | Genome-fragment | 6.6   | 0     |
| 58-final-viral-combined_k141_776511 full     | 4084  | No  | NA   | 3  | 0  | Low-quality    | Genome-fragment | 7.54  | 0     |
| 52-final-viral-combined_k141_102085 full     | 3394  | No  | NA   | 0  | 3  | Not-determined | Genome-fragment | NA    | 0     |
| 51_k141_35301                                | 4084  | No  | NA   | 0  | 0  | Low-quality    | Genome-fragment | 7.02  | 0     |
| 51_k141_35445                                | 4085  | Yes | 3227 | 1  | 1  | Low-quality    | Genome-fragment | 7.62  | 21    |
| 52-final-viral-combined_k141_236791 full     | 1057  | No  | NA   | 0  | 0  | Not-determined | Genome-fragment | NA    | 0     |
| 52-final-viral-combined_k141_162832 full     | 2351  | No  | NA   | 0  | 1  | Not-determined | Genome-fragment | NA    | 0     |
| 52-final-viral-combined_k141_205786 full     | 2045  | No  | NA   | 0  | 1  | Not-determined | Genome-fragment | NA    | 0     |
| 52-final-viral-combined_k141_194843 full     | 6611  | No  | NA   | 0  | 5  | Not-determined | Genome-fragment | NA    | 0     |
| 517-final-viral-combined_k141_95819 full     | 4085  | No  | NA   | 0  | 1  | Low-quality    | Genome-fragment | 9.89  | 0     |
| 517_k141_253540                              | 4085  | No  | NA   | 0  | 2  | Low-quality    | Genome-fragment | 6.03  | 0     |
| 512-final-viral-combined_k141_379842 full    | 4085  | No  | NA   | 0  | 2  | Low-quality    | Genome-fragment | NA    | 0     |
| 52-final-viral-combined_k141_40189 full      | 2312  | No  | NA   | 0  | 3  | Not-determined | Genome-fragment | NA    | 0     |
| 58-final-viral-combined_k141_269059 full     | 4085  | No  | NA   | 0  | 1  | Low-quality    | Genome-fragment | 1.28  | 0     |
| 55_k141_194502                               | 4086  | No  | NA   | 2  | 0  | Low-quality    | Genome-fragment | 2.36  | 0     |
| 52-final-viral-combined_k141_131152 full     | 3527  | No  | NA   | 0  | 1  | Not-determined | Genome-fragment | NA    | 0     |
| 512_k141_388053                              | 4086  | No  | NA   | 0  | 2  | Low-quality    | Genome-fragment | 1.45  | 0     |
| 52-final-viral-combined_k141_18086 full      | 1828  | No  | NA   | 0  | 1  | Not-determined | Genome-fragment | NA    | 0     |
| 52-final-viral-combined_k141_91772 full      | 1802  | No  | NA   | 0  | 0  | Not-determined | Genome-fragment | NA    | 0     |
| 52_k141_181654                               | 4086  | No  | NA   | 0  | 1  | Low-quality    | Genome-fragment | 5.75  | 0     |
| 58-final-viral-combined_k141_9410 full       | 4086  | No  | NA   | 0  | 3  | Low-quality    | Genome-fragment | 1.93  | 0     |
| 52-final-viral-combined_k141_236827 full     | 2955  | No  | NA   | 0  | 3  | Not-determined | Genome-fragment | NA    | 0     |
| 52-final-viral-combined_k141_60307 full      | 2183  | No  | NA   | 0  | 1  | Not-determined | Genome-fragment | NA    | 0     |
| 52-final-viral-combined_k141_122546 full     | 1968  | No  | NA   | 0  | 1  | Not-determined | Genome-fragment | NA    | 0     |
| 52-final-viral-combined_k141_24807 full      | 2651  | No  | NA   | 0  | 1  | Not-determined | Genome-fragment | NA    | 0     |
| 52-final-viral-combined_k141_184743 full     | 1109  | No  | NA   | 0  | 0  | Not-determined | Genome-fragment | NA    | 0     |
| 52-final-viral-combined_k141_184748 full     | 2905  | No  | NA   | 0  | 1  | Not-determined | Genome-fragment | NA    | 0     |
| 52-final-viral-combined_k141_102182 full     | 2863  | No  | NA   | 0  | 0  | Not-determined | Genome-fragment | NA    | 0     |
| 54_k141_143421                               | 4087  | No  | NA   | 0  | 1  | Low-quality    | Genome-fragment | 4.47  | 0     |
| 52-final-viral-combined_k141_236866 full     | 1890  | No  | NA   | 0  | 0  | Not-determined | Genome-fragment | NA    | 0     |
| 511-final-viral-combined_k141_77973 full     | 4088  | No  | NA   | 1  | 0  | Low-quality    | Genome-fragment | 3.27  | 0     |
| 52-final-viral-combined_k141_80623 full      | 1124  | No  | NA   | 0  | 1  | Not-determined | Genome-fragment | NA    | 0     |
| 52-final-viral-combined_k141_60371 full      | 1094  | No  | NA   | 0  | 0  | Not-determined | Genome-fragment | NA    | 0     |
| 52-final-viral-combined_k141_70521 full      | 1361  | No  | NA   | 0  | 0  | Not-determined | Genome-fragment | NA    | 0     |
| 52-final-viral-combined_k141_102211 full     | 1146  | No  | NA   | 0  | 1  | Not-determined | Genome-fragment | NA    | 0     |
| 52-final-viral-combined_k141_102223 full     | 2096  | No  | NA   | 0  | 2  | Not-determined | Genome-fragment | NA    | 0     |
| 53-final-viral-combined_k141_115399 full     | 4088  | No  | NA   | 0  | 2  | Low-quality    | Genome-fragment | 3.02  | 0     |
| 52-final-viral-combined_k141_6567 full       | 2617  | No  | NA   | 0  | 2  | Not-determined | Genome-fragment | NA    | 0     |
| 52-final-viral-combined_k141_111133 full     | 2064  | No  | NA   | 0  | 1  | Not-determined | Genome-fragment | NA    | 0     |
| 55-final-viral-combined_k141_192548 full     | 4090  | No  | NA   | 0  | 0  | Low-quality    | Genome-fragment | 5.41  | 0     |
| 512-final-viral-combined_k141_121898 full    | 4090  | No  | NA   | 0  | 1  | Low-quality    | Genome-fragment | 4.35  | 0     |
| 52-final-viral-combined_k141_203346 full     | 1575  | No  | NA   | 0  | 0  | Not-determined | Genome-fragment | NA    | 0     |
| 52-final-viral-combined_k141_80653 full      | 5724  | No  | NA   | 0  | 4  | Not-determined | Genome-fragment | NA    | 0     |
| 52-final-viral-combined_k141_102282 full     | 2003  | No  | NA   | 0  | 1  | Not-determined | Genome-fragment | NA    | 0     |
| 55-final-viral-combined_k141_81920 full      | 4091  | No  | NA   | 0  | 1  | Low-quality    | Genome-fragment | 8.55  | 0     |
| 52-final-viral-combined_k141_111267 full     | 4091  | No  | NA   | 0  | 3  | Low-quality    | Genome-fragment | 4.45  | 0     |
| 52-final-viral-combined_k141_245564 full     | 71440 | No  | NA   | 21 | 5  | High-quality   | High-quality    | 100   | 0     |
| 52-final-viral-combined_k141_236845 full     | 10710 | No  | NA   | 0  | 6  | Not-determined | Genome-fragment | NA    | 0     |
| 52-final-viral-combined_k141_44964 full      | 4092  | No  | NA   | 0  | 1  | Low-quality    | Genome-fragment | 2.06  | 0     |
| 52-final-viral-combined_k141_91904 full      | 1824  | No  | NA   | 0  | 2  | Not-determined | Genome-fragment | NA    | 0     |
| 58-final-viral-combined_k141_68074 full      | 4092  | No  | NA   | 0  | 0  | Low-quality    | Genome-fragment | 0.85  | 0     |
| 52-final-viral-combined_k141_70866 full      | 3568  | No  | NA   | 0  | 0  | Not-determined | Genome-fragment | NA    | 0     |
| 52-final-viral-combined_k141_224387 full     | 3837  | No  | NA   | 0  | 1  | Not-determined | Genome-fragment | NA    | 0     |
| 52-final-viral-combined_k141_18823 full      | 3316  | No  | NA   | 0  | 3  | Not-determined | Genome-fragment | NA    | 0     |
| 51-final-viral-combined_k141_371391 full     | 4093  | No  | NA   | 0  | 0  | Low-quality    | Genome-fragment | 10.55 | 0     |
| 517-final-viral-combined_k141_82762 H2genome | 4093  | No  | NA   | 1  | 0  | Low-quality    | Genome-fragment | 6.15  | 0     |
| 512-final-viral-combined_k141_166687 full    | 4093  | No  | NA   | 0  | 2  | Low-quality    | Genome-fragment | 2.85  | 0     |
| 52-final-viral-combined_k141_111171 full     | 1417  | No  | NA   | 0  | 2  | Not-determined | Genome-fragment | NA    | 0     |
| 52-final-viral-combined_k141_224399 full     | 2247  | No  | NA   | 0  | 0  | Not-determined | Genome-fragment | NA    | 0     |
| 52-final-viral-combined_k141_111181 full     | 1442  | No  | NA   | 0  | 2  | Not-determined | Genome-fragment | NA    | 0     |
| 52-final-viral-combined_k141_252622 full     | 4094  | Yes | 3568 | 1  | 1  | Low-quality    | Genome-fragment | 2.25  | 12.85 |
| 52-final-viral-combined_k141_40324 full      | 3120  | No  | NA   | 0  | 3  | Not-determined | Genome-fragment | NA    | 0     |
| 52-final-viral-combined_k141_203575 full     | 3294  | No  | NA   | 0  | 2  | Not-determined | Genome-fragment | NA    | 0     |
| 52-final-viral-combined_k141_244603 full     | 1941  | No  | NA   | 0  | 2  | Not-determined | Genome-fragment | NA    | 0     |
| 52-final-viral-combined_k141_40325 full      | 1222  | No  | NA   | 0  | 0  | Not-determined | Genome-fragment | NA    | 0     |
| 512-final-viral-combined_k141_60155 full     | 4095  | No  | NA   | 1  | 0  | Low-quality    | Genome-fragment | 6.47  | 0     |
| 52-final-viral-combined_k141_118502 full     | 4095  | No  | NA   | 0  | 2  | Low-quality    | Genome-fragment | 7.7   | 0     |
| 55-final-viral-combined_k141_113367 full     | 4096  | No  | NA   | 0  | 1  | Low-quality    | Genome-fragment | 5.07  | 0     |
| 52-final-viral-combined_k141_27438 full      | 2629  | No  | NA   | 0  | 0  | Not-determined | Genome-fragment | NA    | 0     |
| 52-final-viral-combined_k141_214926 full     | 2107  | No  | NA   | 0  | 2  | Not-determined | Genome-fragment | NA    | 0     |
| 57_k141_97908                                | 4096  | No  | NA   | 1  | 0  | Low-quality    | Genome-fragment | 9.51  | 0     |
| 52-final-viral-combined_k141_131305 full     | 1202  | No  | NA   | 0  | 0  | Not-determined | Genome-fragment | NA    | 0     |
| 52-final-viral-combined_k141_162801 full     | 2167  | No  | NA   | 0  | 0  | Not-determined | Genome-fragment | NA    | 0     |
| 52-final-viral-combined_k141_16005 full      | 80208 | No  | NA   | 5  | 19 | High-quality   | High-quality    | 100   | 0     |
| 512-final-viral-combined_k141_217952 full    | 4096  | No  | NA   | 0  | 0  | Low-quality    | Genome-fragment | 7.9   | 0     |
| 52-final-viral-combined_k141_214950 full     | 2890  | No  | NA   | 0  | 2  | Not-determined | Genome-fragment | NA    | 0     |
| 51-final-viral-combined_k141_367920 full     | 4097  | No  | NA   | 0  | 4  | Low-quality    | Genome-fragment | 1.35  | 0     |
| 55_k141_41801                                | 4097  | No  | NA   | 1  | 0  | Low-quality    | Genome-fragment | 4.59  | 0     |
| 52-final-viral-combined_k141_91979 full      | 2547  | No  | NA   | 0  | 2  | Not-determined | Genome-fragment | NA    | 0     |
| 52-final-viral-combined_k141_244676 full     | 5142  | No  | NA   | 0  | 5  | Not-determined | Genome-fragment | NA    | 0     |
| 52-final-viral-combined_k141_162826 full     | 1965  | No  | NA   | 0  | 0  | Not-determined | Genome-fragment | NA    | 0     |
| 52-final-viral-combined_k141_91982 full      | 2144  | No  | NA   | 0  | 0  | Not-determined | Genome-fragment | NA    | 0     |
| 52-final-viral-combined_k141_6629 full       | 1403  | No  | NA   | 0  | 1  | Not-determined | Genome-fragment | NA    | 0     |
| 52-final-viral-combined_k141_27469 full      | 2243  | No  | NA   | 0  | 2  | Not-determined | Genome-fragment | NA    | 0     |
| 52-final-viral-combined_k141_70726 full      | 2715  | No  | NA   | 0  | 1  | Not-determined | Genome-fragment | NA    | 0     |
| 52-final-viral-combined_k141_214970 full     | 1454  | No  | NA   | 0  | 1  | Not-determined | Genome-fragment | NA    | 0     |
| 52-final-viral-combined_k141_122674 full     | 1100  | No  | NA   | 0  | 1  | Not-determined | Genome-fragment | NA    | 0     |
| 52-final-viral-combined_k141_70754 full      | 4187  | No  | NA   | 0  | 0  | Not-determined | Genome-fragment | NA    | 0     |
| 517_k141_265936                              | 4097  | No  | NA   | 0  | 2  | Low-quality    | Genome-fragment | 2.18  | 0     |
| 52_k141_92744                                | 4097  | No  | NA   | 3  | 0  | Low-quality    | Genome-fragment | 2.26  | 0     |
| 52-final-viral-combined_k141_122677 full     | 6213  | No  | NA   | 0  | 2  | Not-determined | Genome-fragment | NA    | 0     |
| 57-final-viral-combined_k141_216126 full     | 4098  | No  | NA   | 0  | 3  | Low-quality    | Genome-fragment | 4.83  | 0     |
| 52-final-viral-combined_k141_162854 full     | 1660  | No  | NA   | 0  | 1  | Not-determined | Genome-fragment | NA    | 0     |
| 52-final-viral-combined_k141_20600 full      | 4715  | No  | NA   | 0  | 6  | Not-determined | Genome-fragment | NA    | 0     |
| 517-final-viral-combined_k141_138600 full    | 4099  | No  | NA   | 0  | 2  | Low-quality    | Genome-fragment | 2.84  | 0     |
| 51-final-viral-combined_k141_57149 full      | 4100  | No  | NA   | 1  | 0  | Low-quality    | Genome-fragment | 4.98  | 0     |
| 51-final-viral-combined_k141_173406 full     | 4100  | No  | NA   | 1  | 0  | Low-quality    | Genome-fragment | 10.27 | 0     |
| 52-final-viral-combined_k141_153321 full     | 2173  | No  | NA   | 0  | 1  | Not-determined | Genome-fragment | NA    | 0     |
| 52-final-viral-combined_k141_215015 full     | 6379  | No  | NA   | 0  | 6  | Not-determined | Genome-fragment | NA    | 0     |
| 51-final-viral-combined_k141_294563 full     | 4100  | Yes | 3845 | 1  | 1  | Low-quality    | Genome-fragment | 12.05 | 6.22  |
| 52-final-viral-combined_k141_40418 full      | 4262  | No  | NA   | 0  | 0  | Not-determined | Genome-fragment | NA    | 0     |
| 57_k141_66849                                | 4102  | No  | NA   | 1  | 0  | Low-quality    | Genome-fragment | 6.62  | 0     |
| 52-final-viral-combined_k141_224525 full     | 9233  | No  | NA   | 0  | 4  | Not-determined | Genome-fragment | NA    | 0     |
| 52-final-viral-combined_k141_155302 full     | 4103  | No  | NA   | 1  | 0  | Low-quality    | Genome-fragment | 11.27 | 0     |
| 52-final-viral-combined_k141_192816 full     | 4104  | No  | NA   | 0  | 4  | Not-determined | Genome-fragment | 2.76  | 0     |
| 52-final-viral-combined_k141_40851 full      | 4106  | No  | NA   | 0  | 0  | Low-quality    | Genome-fragment | 9.51  | 0     |
| 52-final-viral-combined_k141_237347 full     | 1665  | No  | NA   | 0  | 3  | Not-determined | Genome-fragment | NA    | 0     |
| 57-final-viral-combined_k141_189781 full     | 4108  | No  | NA   | 0  | 1  | Low-quality    | Genome-fragment | 1.3   | 0     |
| 52-final-viral-combined_k141_60641 full      | 1408  | No  | NA   | 0  | 1  | Not-determined | Genome-fragment | NA    | 0     |
| 52-final-viral-combined_k141_6685 full       | 2611  | No  | NA   | 0  | 2  | Not-determined | Genome-fragment | NA    | 0     |
| 52_k141_20743                                | 4109  | No  | NA   | 0  | 0  | Low-quality    | Genome-fragment | 8.04  | 0     |
| 52-final-viral-combined_k141_215058 full     | 1909  | No  | NA   | 0  | 1  | Not-determined | Genome-fragment | NA    | 0     |
| 52-final-viral-combined_k141_244754 full     | 1157  | No  | NA   | 0  | 0  | Not-determined | Genome-fragment | NA    | 0     |
| 52-final-viral-combined_k141_232129 full     | 22722 | No  | NA   | 0  | 2  | Not-determined | Genome-fragment | NA    | 0     |
| 52-final-viral-combined_k141_49136 full      | 4112  | No  | NA   | 1  | 0  | Low-quality    | Genome-fragment | 6.37  | 0     |
| 52-final-viral-combined_k141_244765 full     | 1197  | No  | NA   | 0  | 1  | Not-determined | Genome-fragment | NA    | 0     |
| 52-final-viral-combined_k141_131442 full     | 3986  | No  | NA   | 0  | 0  | Not-determined | Genome-fragment | NA    | 0     |
| 59_k141_100567                               | 4113  | Yes | 738  | 1  | 0  | Low-quality    | Genome-fragment | 81.06 | 0.46  |
| 52-final-viral-combined_k141_122798 full     | 1515  | No  | NA   | 0  | 0  | Not-determined | Genome-fragment | NA    | 0     |
| 53_k141_107322                               | 4113  | No  | NA   | 1  | 0  | Low-quality    | Genome-fragment | 5.21  | 0     |
| 57_k141_184657                               | 4113  | No  | NA   | 2  | 0  | Low-quality    | Genome-fragment | 7.8   | 0     |
| 52-final-viral-combined_k141_203716 full     | 2399  | No  | NA   | 0  | 1  | Not-determined | Genome-fragment | NA    | 0     |
| 52-final-viral-combined_k141_275241 full     | 2876  | No  | NA   | 0  | 2  | Not-determined | Genome-fragment | NA    | 0     |
| 52-final-viral-combined_k141_102403 full     | 1017  | No  | NA   | 0  | 0  | Not-determined | Genome-fragment | NA    | 0     |
| 52-final-viral-combined_k141_153649 full     | 5766  | No  | NA   | 0  | 5  | Not-determined | Genome-fragment | NA    | 0     |
| 512-final-viral-combined_k141_217002 full    | 4113  | No  | NA   | 0  | 4  | Low-quality    | Genome-fragment | 1.13  | 0     |
| 52-final-viral-combined_k141_60751 full      | 8825  | No  | NA   | 0  | 4  | Not-determined | Genome-fragment | NA    | 0     |
| 52-final-viral-combined_k141_162931 full     | 1317  | No  | NA   | 0  | 0  | Not-determined | Genome-fragment | NA    | 0     |
| 52-final-viral-combined_k141_111343 full     | 1137  | No  | NA   | 0  | 0  | Not-determined | Genome-fragment | NA    | 0     |
| 52-final-viral-combined_k141_237260 full     | 1975  | No  | NA   | 0  | 3  | Not-determined | Genome-fragment | NA    | 0     |
| 59_k141_49477                                | 4114  | No  | NA   | 4  | 0  | Low-quality    |                 |       |       |



|                                        |      |       |     |      |   |   |                |                 |    |       |       |
|----------------------------------------|------|-------|-----|------|---|---|----------------|-----------------|----|-------|-------|
| S2-final-viral-combined_k141_175888]]  | full | 3862  | No  | NA   | 0 | 0 | Not-determined | Genome-fragment | NA | 0     | 0     |
| S2-final-viral-combined_k141_237454]]  | full | 1411  | No  | NA   | 0 | 0 | Not-determined | Genome-fragment | NA | 0     | 0     |
| S12_k141_376867                        |      | 4122  | No  | NA   | 0 | 0 | Low-quality    | Genome-fragment | NA | 18.17 | 0     |
| S2-final-viral-combined_k141_102666]]  | full | 2019  | No  | NA   | 0 | 1 | Not-determined | Genome-fragment | NA | 0     | 0     |
| S2-final-viral-combined_k141_173439]]  | full | 4122  | No  | NA   | 3 | 0 | Low-quality    | Genome-fragment | NA | 8.64  | 0     |
| S12-final-viral-combined_k141_385975]] | full | 4123  | No  | NA   | 1 | 0 | Low-quality    | Genome-fragment | NA | 6.79  | 0     |
| S2-final-viral-combined_k141_175922]]  | full | 1045  | No  | NA   | 0 | 1 | Not-determined | Genome-fragment | NA | 0     | 0     |
| S2-final-viral-combined_k141_215377]]  | full | 2093  | No  | NA   | 0 | 0 | Not-determined | Genome-fragment | NA | 0     | 0     |
| S2-final-viral-combined_k141_111457]]  | full | 1648  | No  | NA   | 0 | 2 | Not-determined | Genome-fragment | NA | 0     | 0     |
| S6-final-viral-combined_k141_115867]]  | full | 4124  | No  | NA   | 0 | 0 | Low-quality    | Genome-fragment | NA | 3.1   | 0     |
| S2-final-viral-combined_k141_215393]]  | full | 1155  | No  | NA   | 0 | 0 | Not-determined | Genome-fragment | NA | 0     | 0     |
| S2-final-viral-combined_k141_162987]]  | full | 1884  | No  | NA   | 1 | 1 | Not-determined | Genome-fragment | NA | 0     | 0     |
| S2-final-viral-combined_k141_215396]]  | full | 1382  | No  | NA   | 0 | 2 | Not-determined | Genome-fragment | NA | 0     | 0     |
| S2-final-viral-combined_k141_192151]]  | full | 1872  | No  | NA   | 0 | 1 | Not-determined | Genome-fragment | NA | 0     | 0     |
| S2-final-viral-combined_k141_71035]]   | full | 1609  | No  | NA   | 0 | 0 | Not-determined | Genome-fragment | NA | 0     | 0     |
| S2-final-viral-combined_k141_195237]]  | full | 2177  | No  | NA   | 1 | 1 | Not-determined | Genome-fragment | NA | 0     | 0     |
| S2-final-viral-combined_k141_19230]]   | full | 6071  | No  | NA   | 0 | 1 | Not-determined | Genome-fragment | NA | 0     | 0     |
| S17-final-viral-combined_k141_234984]] | full | 4125  | No  | NA   | 1 | 0 | Low-quality    | Genome-fragment | NA | 9.47  | 0     |
| S2_k141_82144                          |      | 4127  | No  | NA   | 1 | 0 | Low-quality    | Genome-fragment | NA | 7.49  | 0     |
| S2-final-viral-combined_k141_81124]]   | full | 1360  | No  | NA   | 0 | 0 | Not-determined | Genome-fragment | NA | 0     | 0     |
| S2-final-viral-combined_k141_185122]]  | full | 1648  | No  | NA   | 0 | 1 | Not-determined | Genome-fragment | NA | 0     | 0     |
| S11-final-viral-combined_k141_285822]] | full | 4128  | No  | NA   | 0 | 0 | Low-quality    | Genome-fragment | NA | 5.84  | 0     |
| S8_k141_115051                         |      | 4129  | No  | NA   | 0 | 1 | Low-quality    | Genome-fragment | NA | 6.39  | 0     |
| S1-final-viral-combined_k141_138328]]  | full | 4131  | No  | NA   | 0 | 2 | Low-quality    | Genome-fragment | NA | 2.85  | 0     |
| S4-final-viral-combined_k141_109377]]  | full | 4131  | No  | NA   | 0 | 1 | Low-quality    | Genome-fragment | NA | 12.11 | 0     |
| S2-final-viral-combined_k141_19246]]   | full | 3653  | No  | NA   | 0 | 0 | Not-determined | Genome-fragment | NA | 0     | 0     |
| S5-final-viral-combined_k141_145349]]  | full | 4132  | No  | NA   | 0 | 4 | Low-quality    | Genome-fragment | NA | 12.51 | 0     |
| S2-final-viral-combined_k141_102750]]  | full | 3198  | No  | NA   | 0 | 0 | Not-determined | Genome-fragment | NA | 0     | 0     |
| S8_k141_157917                         |      | 4132  | No  | NA   | 0 | 0 | Low-quality    | Genome-fragment | NA | 8.08  | 0     |
| S12-final-viral-combined_k141_364413]] | full | 4134  | No  | NA   | 3 | 0 | Low-quality    | Genome-fragment | NA | 10.56 | 0     |
| S12_k141_325046                        |      | 4134  | No  | NA   | 3 | 0 | Low-quality    | Genome-fragment | NA | 11.12 | 0     |
| S2-final-viral-combined_k141_153938]]  | full | 2587  | No  | NA   | 2 | 2 | Not-determined | Genome-fragment | NA | 0     | 0     |
| S2-final-viral-combined_k141_204011]]  | full | 1379  | No  | NA   | 0 | 1 | Not-determined | Genome-fragment | NA | 0     | 0     |
| S2-final-viral-combined_k141_71124]]   | full | 1975  | No  | NA   | 0 | 0 | Not-determined | Genome-fragment | NA | 0     | 0     |
| S12-final-viral-combined_k141_376660]] | full | 4135  | No  | NA   | 1 | 0 | Low-quality    | Genome-fragment | NA | 7.3   | 0     |
| S2-final-viral-combined_k141_198188]]  | full | 4135  | No  | NA   | 0 | 0 | Low-quality    | Genome-fragment | NA | 3.06  | 0     |
| S7-final-viral-combined_k141_169723]]  | full | 4137  | No  | NA   | 0 | 1 | Low-quality    | Genome-fragment | NA | 2.07  | 0     |
| S2-final-viral-combined_k141_195330]]  | full | 2439  | No  | NA   | 0 | 1 | Not-determined | Genome-fragment | NA | 0     | 0     |
| S8_k141_20367                          |      | 4137  | No  | NA   | 2 | 0 | Low-quality    | Genome-fragment | NA | 11.73 | 0     |
| S9-final-viral-combined_k141_101956]]  | full | 4138  | No  | NA   | 1 | 0 | Low-quality    | Genome-fragment | NA | 8.6   | 0     |
| S7-final-viral-combined_k141_4851]]    | full | 4138  | No  | NA   | 2 | 0 | Low-quality    | Genome-fragment | NA | 9.99  | 0     |
| S6_k141_14614                          |      | 4139  | No  | NA   | 0 | 2 | Low-quality    | Genome-fragment | NA | 2.88  | 0     |
| S2-final-viral-combined_k141_131584]]  | full | 4098  | No  | NA   | 0 | 3 | Not-determined | Genome-fragment | NA | 0     | 0     |
| S2-final-viral-combined_k141_215492]]  | full | 1360  | No  | NA   | 0 | 0 | Not-determined | Genome-fragment | NA | 0     | 0     |
| S9_k141_123787                         |      | 4140  | No  | NA   | 0 | 0 | Low-quality    | Genome-fragment | NA | 5.46  | 0     |
| S2-final-viral-combined_k141_163106]]  | full | 2629  | No  | NA   | 0 | 0 | Not-determined | Genome-fragment | NA | 0     | 0     |
| S2-final-viral-combined_k141_153997]]  | full | 1151  | No  | NA   | 0 | 0 | Not-determined | Genome-fragment | NA | 0     | 0     |
| S2-final-viral-combined_k141_224787]]  | full | 2533  | No  | NA   | 0 | 0 | Not-determined | Genome-fragment | NA | 0     | 0     |
| S1-final-viral-combined_k141_247869]]  | full | 4140  | No  | NA   | 1 | 0 | Low-quality    | Genome-fragment | NA | 10.13 | 0     |
| S5-final-viral-combined_k141_94693]]   | full | 4141  | No  | NA   | 4 | 0 | Low-quality    | Genome-fragment | NA | 9.33  | 0     |
| S7-final-viral-combined_k141_126782]]  | full | 4142  | No  | NA   | 0 | 1 | Low-quality    | Genome-fragment | NA | 7.63  | 0     |
| S2-final-viral-combined_k141_102832]]  | full | 1658  | No  | NA   | 0 | 0 | Not-determined | Genome-fragment | NA | 0     | 0     |
| S2_k141_98926                          |      | 4142  | No  | NA   | 0 | 1 | Low-quality    | Genome-fragment | NA | 2.6   | 0     |
| S1-final-viral-combined_k141_68775]]   | full | 4143  | Yes | 3373 | 2 | 1 | Low-quality    | Genome-fragment | NA | 8.76  | 18.59 |
| S2-final-viral-combined_k141_92884]]   | full | 1289  | No  | NA   | 0 | 0 | Not-determined | Genome-fragment | NA | 0     | 0     |
| S2-final-viral-combined_k141_27737]]   | full | 1087  | No  | NA   | 0 | 0 | Not-determined | Genome-fragment | NA | 0     | 0     |
| S2-final-viral-combined_k141_176001]]  | full | 1278  | No  | NA   | 0 | 0 | Not-determined | Genome-fragment | NA | 0     | 0     |
| S3-final-viral-combined_k141_17671]]   | full | 4143  | No  | NA   | 0 | 0 | Low-quality    | Genome-fragment | NA | 1.91  | 0     |
| S7-final-viral-combined_k141_64705]]   | full | 4145  | No  | 2195 | 1 | 0 | Low-quality    | Genome-fragment | NA | 8.76  | 0     |
| S12_k141_174703                        |      | 4145  | Yes |      | 2 | 2 | Low-quality    | Genome-fragment | NA | 5.6   | 47.04 |
| S2-final-viral-combined_k141_161849]]  | full | 1154  | No  | NA   | 0 | 2 | Not-determined | Genome-fragment | NA | 0     | 0     |
| S2-final-viral-combined_k141_163212]]  | full | 4445  | No  | NA   | 2 | 2 | Not-determined | Genome-fragment | NA | 0     | 0     |
| S11-final-viral-combined_k141_219770]] | full | 4146  | No  | NA   | 0 | 3 | Low-quality    | Genome-fragment | NA | 0.46  | 0     |
| S17-k141_41686                         |      | 4146  | No  | NA   | 0 | 2 | Low-quality    | Genome-fragment | NA | 13.82 | 0     |
| S12_k141_115948                        |      | 4146  | No  | NA   | 0 | 2 | Low-quality    | Genome-fragment | NA | 1.72  | 0     |
| S17-final-viral-combined_k141_81918]]  | full | 4147  | No  | NA   | 0 | 1 | Low-quality    | Genome-fragment | NA | 5.97  | 0     |
| S12-final-viral-combined_k141_399843]] | full | 4147  | No  | NA   | 7 | 0 | Low-quality    | Genome-fragment | NA | 6.4   | 0     |
| S2-final-viral-combined_k141_245027]]  | full | 5665  | No  | NA   | 0 | 3 | Not-determined | Genome-fragment | NA | 0     | 0     |
| S2-final-viral-combined_k141_185136]]  | full | 1795  | No  | NA   | 0 | 0 | Not-determined | Genome-fragment | NA | 0     | 0     |
| S8_k141_177750                         |      | 4147  | No  | NA   | 0 | 0 | Low-quality    | Genome-fragment | NA | 6.38  | 0     |
| S11-final-viral-combined_k141_167715]] | full | 4149  | No  | NA   | 0 | 2 | Low-quality    | Genome-fragment | NA | 5.88  | 0     |
| S2-final-viral-combined_k141_61142]]   | full | 2582  | No  | NA   | 0 | 0 | Not-determined | Genome-fragment | NA | 0     | 0     |
| S17-final-viral-combined_k141_190898]] | full | 4149  | No  | NA   | 0 | 0 | Low-quality    | Genome-fragment | NA | 7.77  | 0     |
| S1-final-viral-combined_k141_5694]]    | full | 4150  | No  | NA   | 0 | 0 | Low-quality    | Genome-fragment | NA | 11    | 0     |
| S2-final-viral-combined_k141_131735]]  | full | 1459  | No  | NA   | 0 | 0 | Not-determined | Genome-fragment | NA | 0     | 0     |
| S2-final-viral-combined_k141_40905]]   | full | 2099  | No  | NA   | 0 | 1 | Not-determined | Genome-fragment | NA | 0     | 0     |
| S2-final-viral-combined_k141_61207]]   | full | 1141  | No  | NA   | 0 | 1 | Not-determined | Genome-fragment | NA | 0     | 0     |
| S2-final-viral-combined_k141_154102]]  | full | 4907  | No  | NA   | 0 | 0 | Not-determined | Genome-fragment | NA | 0     | 0     |
| S5-final-viral-combined_k141_147421]]  | full | 4150  | No  | NA   | 0 | 0 | Low-quality    | Genome-fragment | NA | 8.54  | 0     |
| S2-final-viral-combined_k141_195655]]  | full | 1019  | No  | NA   | 0 | 0 | Not-determined | Genome-fragment | NA | 0     | 0     |
| S2-final-viral-combined_k141_23460]]   | full | 1614  | No  | NA   | 0 | 1 | Not-determined | Genome-fragment | NA | 0     | 0     |
| S7-final-viral-combined_k141_204241]]  | full | 4150  | No  | NA   | 0 | 1 | Low-quality    | Genome-fragment | NA | 5.78  | 0     |
| S2-final-viral-combined_k141_185452]]  | full | 3337  | No  | NA   | 0 | 2 | Not-determined | Genome-fragment | NA | 0     | 0     |
| S2-final-viral-combined_k141_245167]]  | full | 3476  | No  | NA   | 0 | 1 | Not-determined | Genome-fragment | NA | 0     | 0     |
| S2-final-viral-combined_k141_215866]]  | full | 2084  | No  | NA   | 0 | 1 | Not-determined | Genome-fragment | NA | 0     | 0     |
| S2-final-viral-combined_k141_61268]]   | full | 1163  | No  | NA   | 0 | 0 | Not-determined | Genome-fragment | NA | 0     | 0     |
| S2-final-viral-combined_k141_111810]]  | full | 2792  | No  | NA   | 0 | 1 | Not-determined | Genome-fragment | NA | 0     | 0     |
| S17-final-viral-combined_k141_158947]] | full | 4151  | No  | NA   | 0 | 2 | Low-quality    | Genome-fragment | NA | 1.07  | 0     |
| S2-final-viral-combined_k141_194293]]  | full | 6279  | No  | NA   | 0 | 0 | Not-determined | Genome-fragment | NA | 0     | 0     |
| S7-final-viral-combined_k141_121178]]  | full | 4153  | No  | NA   | 1 | 0 | Low-quality    | Genome-fragment | NA | 7.91  | 0     |
| S11_k141_68215                         |      | 4154  | No  | NA   | 0 | 0 | Low-quality    | Genome-fragment | NA | 4.04  | 0     |
| S2-final-viral-combined_k141_185470]]  | full | 1562  | No  | NA   | 0 | 2 | Not-determined | Genome-fragment | NA | 0     | 0     |
| S2-final-viral-combined_k141_154174]]  | full | 1015  | No  | NA   | 0 | 1 | Not-determined | Genome-fragment | NA | 0     | 0     |
| S2-final-viral-combined_k141_203609]]  | full | 4154  | No  | NA   | 0 | 2 | Low-quality    | Genome-fragment | NA | 4.32  | 0     |
| S2-final-viral-combined_k141_154189]]  | full | 1951  | No  | NA   | 0 | 3 | Not-determined | Genome-fragment | NA | 0     | 0     |
| S2-final-viral-combined_k141_195740]]  | full | 12345 | No  | NA   | 0 | 8 | Not-determined | Genome-fragment | NA | 0     | 0     |
| S2-final-viral-combined_k141_123198]]  | full | 1812  | No  | NA   | 0 | 0 | Not-determined | Genome-fragment | NA | 0     | 0     |
| S17-k141_2447                          |      | 4155  | No  | NA   | 0 | 0 | Low-quality    | Genome-fragment | NA | 6.3   | 0     |
| S2-final-viral-combined_k141_19485]]   | full | 7136  | No  | NA   | 0 | 1 | Not-determined | Genome-fragment | NA | 0     | 0     |
| S2-final-viral-combined_k141_195756]]  | full | 1099  | No  | NA   | 0 | 0 | Not-determined | Genome-fragment | NA | 0     | 0     |
| S2-final-viral-combined_k141_116186]]  | full | 4156  | No  | NA   | 1 | 0 | Low-quality    | Genome-fragment | NA | 6.29  | 0     |
| S2-final-viral-combined_k141_215898]]  | full | 5201  | No  | NA   | 0 | 0 | Not-determined | Genome-fragment | NA | 0     | 0     |
| S2-final-viral-combined_k141_19544]]   | full | 8697  | No  | NA   | 0 | 5 | Not-determined | Genome-fragment | NA | 0     | 0     |
| S2-final-viral-combined_k141_195818]]  | full | 1021  | No  | NA   | 0 | 1 | Not-determined | Genome-fragment | NA | 0     | 0     |
| S9-final-viral-combined_k141_93102]]   | full | 4157  | No  | NA   | 0 | 2 | Low-quality    | Genome-fragment | NA | 1.39  | 0     |
| S2-final-viral-combined_k141_143956]]  | full | 5138  | No  | NA   | 0 | 1 | Not-determined | Genome-fragment | NA | 0     | 0     |
| S2-final-viral-combined_k141_19571]]   | full | 1025  | No  | NA   | 0 | 0 | Not-determined | Genome-fragment | NA | 0     | 0     |
| S2-final-viral-combined_k141_19573]]   | full | 2287  | No  | NA   | 0 | 0 | Not-determined | Genome-fragment | NA | 0     | 0     |
| S3-final-viral-combined_k141_17687]]   | full | 4157  | No  | NA   | 0 | 0 | Low-quality    | Genome-fragment | NA | 2.53  | 0     |
| S2-final-viral-combined_k141_131901]]  | full | 5216  | No  | NA   | 0 | 2 | Not-determined | Genome-fragment | NA | 0     | 0     |
| S2-final-viral-combined_k141_19579]]   | full | 2291  | No  | NA   | 0 | 1 | Not-determined | Genome-fragment | NA | 0     | 0     |
| S2-final-viral-combined_k141_131899]]  | full | 6215  | No  | NA   | 0 | 1 | Not-determined | Genome-fragment | NA | 0     | 0     |
| S3-final-viral-combined_k141_22117]]   | full | 4157  | No  | NA   | 3 | 0 | Low-quality    | Genome-fragment | NA | 7.66  | 0     |
| S2-final-viral-combined_k141_7155]]    | full | 2181  | No  | NA   | 0 | 0 | Not-determined | Genome-fragment | NA | 0     | 0     |
| S12_k141_26267                         |      | 4157  | No  | NA   | 0 | 3 | Low-quality    | Genome-fragment | NA | 2.42  | 0     |
| S2-final-viral-combined_k141_103120]]  | full | 2566  | No  | NA   | 0 | 1 | Not-determined | Genome-fragment | NA | 0     | 0     |
| S2-final-viral-combined_k141_7178]]    | full | 7380  | No  | NA   | 0 | 1 | Not-determined | Genome-fragment | NA | 0     | 0     |
| S11_k141_213952                        |      | 4159  | No  | NA   | 0 | 0 | Low-quality    | Genome-fragment | NA | 7.32  | 0     |
| S2-final-viral-combined_k141_131953]]  | full | 5057  | No  | NA   | 0 | 0 | Not-determined | Genome-fragment | NA | 0     | 0     |
| S1-final-viral-combined_k141_178615]]  | full | 4161  | No  | NA   | 0 | 3 | Low-quality    | Genome-fragment | NA | 2.31  | 0     |
| S7_k141_52436                          |      | 4161  | No  | NA   | 0 | 2 | Low-quality    | Genome-fragment | NA | 10.72 | 0     |
| S17-k141_130429                        |      | 4162  | No  | NA   | 0 | 1 | Low-quality    | Genome-fragment | NA |       |       |



|                                       |       |       |     |      |   |   |                |                 |       |       |
|---------------------------------------|-------|-------|-----|------|---|---|----------------|-----------------|-------|-------|
| S12-final-viral-combined_k141_188429] | [full | 4186  | No  | NA   | 3 | 0 | Low-quality    | Genome-fragment | 9.68  | 0     |
| S2-final-viral-combined_k141_176868]  | [full | 4187  | No  | NA   | 0 | 1 | Low-quality    | Genome-fragment | 2.1   | 0     |
| S5-final-viral-combined_k141_22926]   | [full | 4188  | No  | NA   | 1 | 0 | Low-quality    | Genome-fragment | 4.42  | 0     |
| S2-final-viral-combined_k141_217053]  | [full | 4189  | No  | NA   | 0 | 1 | Low-quality    | Genome-fragment | 7.76  | 0     |
| S4_k141_121071]                       | [full | 4189  | No  | NA   | 0 | 1 | Low-quality    | Genome-fragment | 2.06  | 0     |
| S2-final-viral-combined_k141_112071]  | [full | 3644  | No  | NA   | 0 | 2 | Not-determined | Genome-fragment | NA    | 0     |
| S2-final-viral-combined_k141_154687]  | [full | 1671  | No  | NA   | 0 | 1 | Not-determined | Genome-fragment | NA    | 0     |
| S2-final-viral-combined_k141_28345]   | [full | 2357  | No  | NA   | 0 | 1 | Not-determined | Genome-fragment | NA    | 0     |
| S2-final-viral-combined_k141_81965]   | [full | 1047  | No  | NA   | 0 | 1 | Not-determined | Genome-fragment | NA    | 0     |
| S1_k141_198891                        |       | 4190  | No  | NA   | 0 | 4 | Low-quality    | Genome-fragment | 1.16  | 0     |
| S2-final-viral-combined_k141_111820]  | [full | 4191  | No  | NA   | 1 | 0 | Low-quality    | Genome-fragment | 2.67  | 0     |
| S2-final-viral-combined_k141_219262]  | [full | 2390  | No  | NA   | 0 | 0 | Not-determined | Genome-fragment | NA    | 0     |
| S11-final-viral-combined_k141_310904] | [full | 4192  | No  | NA   | 0 | 1 | Low-quality    | Genome-fragment | 4.85  | 0     |
| S2-final-viral-combined_k141_616688]  | [full | 1014  | No  | NA   | 0 | 2 | Not-determined | Genome-fragment | NA    | 0     |
| S12-final-viral-combined_k141_165282] | [full | 4192  | No  | NA   | 0 | 3 | Low-quality    | Genome-fragment | 2.26  | 0     |
| S6-final-viral-combined_k141_16599]   | [full | 4193  | No  | NA   | 0 | 0 | Not-determined | Genome-fragment | 0.49  | 0     |
| S2-final-viral-combined_k141_123517]  | [full | 2188  | No  | NA   | 0 | 0 | Not-determined | Genome-fragment | NA    | 0     |
| S2-final-viral-combined_k141_41354]   | [full | 2129  | No  | NA   | 0 | 0 | Not-determined | Genome-fragment | NA    | 0     |
| S12-final-viral-combined_k141_110188] | [full | 4194  | No  | NA   | 0 | 0 | Low-quality    | Genome-fragment | 3.77  | 0     |
| S2-final-viral-combined_k141_19982]   | [full | 1231  | No  | NA   | 0 | 0 | Not-determined | Genome-fragment | NA    | 0     |
| S2-final-viral-combined_k141_123531]  | [full | 2269  | No  | NA   | 0 | 1 | Not-determined | Genome-fragment | NA    | 0     |
| S12_k141_12591                        |       | 4194  | No  | NA   | 0 | 0 | Low-quality    | Genome-fragment | 6.91  | 0     |
| S2-final-viral-combined_k141_238082]  | [full | 6763  | No  | NA   | 0 | 2 | Not-determined | Genome-fragment | NA    | 0     |
| S2-final-viral-combined_k141_163780]  | [full | 5179  | No  | NA   | 0 | 0 | Not-determined | Genome-fragment | NA    | 0     |
| S2-final-viral-combined_k141_28422]   | [full | 3341  | No  | NA   | 0 | 1 | Not-determined | Genome-fragment | NA    | 0     |
| S2-final-viral-combined_k141_185838]  | [full | 1012  | No  | NA   | 0 | 0 | Not-determined | Genome-fragment | NA    | 0     |
| S2-final-viral-combined_k141_72010]   | [full | 2178  | No  | NA   | 0 | 2 | Not-determined | Genome-fragment | NA    | 0     |
| S2-final-viral-combined_k141_82057]   | [full | 1835  | No  | NA   | 0 | 2 | Not-determined | Genome-fragment | NA    | 0     |
| S2-final-viral-combined_k141_185871]  | [full | 1012  | No  | NA   | 0 | 2 | Not-determined | Genome-fragment | NA    | 0     |
| S1-final-viral-combined_k141_362619]  | [full | 4195  | No  | NA   | 0 | 0 | Low-quality    | Genome-fragment | 9.69  | 0     |
| S2-final-viral-combined_k141_82059]   | [full | 1224  | No  | NA   | 0 | 2 | Not-determined | Genome-fragment | NA    | 0     |
| S7-final-viral-combined_k141_17851]   | [full | 4195  | No  | NA   | 1 | 0 | Low-quality    | Genome-fragment | 6.81  | 0     |
| S2-final-viral-combined_k141_188155]  | [full | 4196  | No  | NA   | 0 | 0 | Low-quality    | Genome-fragment | 7.83  | 0     |
| S3-final-viral-combined_k141_101919]  | [full | 4197  | No  | NA   | 0 | 1 | Low-quality    | Genome-fragment | 1.33  | 0     |
| S7_k141_207454                        |       | 4197  | No  | NA   | 0 | 1 | Low-quality    | Genome-fragment | 4.08  | 0     |
| S2-final-viral-combined_k141_61792]   | [full | 1744  | No  | NA   | 0 | 0 | Not-determined | Genome-fragment | NA    | 0     |
| S2-final-viral-combined_k141_7570]    | [full | 2109  | No  | NA   | 0 | 0 | Not-determined | Genome-fragment | NA    | 0     |
| S2-final-viral-combined_k141_21802]   | [full | 1556  | No  | NA   | 0 | 1 | Not-determined | Genome-fragment | NA    | 0     |
| S17-final-viral-combined_k141_151902] | [full | 4198  | No  | NA   | 0 | 1 | Low-quality    | Genome-fragment | 4.32  | 0     |
| S2-final-viral-combined_k141_238105]  | [full | 1201  | No  | NA   | 0 | 1 | Not-determined | Genome-fragment | NA    | 0     |
| S2-final-viral-combined_k141_7586]    | [full | 2096  | No  | NA   | 0 | 1 | Not-determined | Genome-fragment | NA    | 0     |
| S2-final-viral-combined_k141_103167]  | [full | 1742  | No  | NA   | 0 | 1 | Not-determined | Genome-fragment | NA    | 0     |
| S2-final-viral-combined_k141_119706]  | [full | 4198  | No  | NA   | 3 | 0 | Low-quality    | Genome-fragment | 7.88  | 0     |
| S2-final-viral-combined_k141_132311]  | [full | 1525  | No  | NA   | 0 | 2 | Not-determined | Genome-fragment | NA    | 0     |
| S12-final-viral-combined_k141_34553]  | [full | 4199  | No  | NA   | 0 | 0 | Low-quality    | Genome-fragment | 6.47  | 0     |
| S2-final-viral-combined_k141_116248]  | [full | 2141  | No  | NA   | 0 | 3 | Not-determined | Genome-fragment | NA    | 0     |
| S2-final-viral-combined_k141_124746]  | [full | 4200  | No  | NA   | 3 | 0 | Low-quality    | Genome-fragment | 14.81 | 0     |
| S4_k141_77235                         |       | 4201  | No  | NA   | 0 | 3 | Low-quality    | Genome-fragment | 0.61  | 0     |
| S11-final-viral-combined_k141_80014]  | [full | 4203  | No  | NA   | 2 | 0 | Low-quality    | Genome-fragment | 11.78 | 0     |
| S2-final-viral-combined_k141_112229]  | [full | 1703  | No  | NA   | 0 | 0 | Not-determined | Genome-fragment | NA    | 0     |
| S17-final-viral-combined_k141_71045]  | [full | 4203  | No  | NA   | 0 | 2 | Low-quality    | Genome-fragment | 1.4   | 0     |
| S2-final-viral-combined_k141_140524]  | [full | 1566  | No  | NA   | 0 | 1 | Not-determined | Genome-fragment | NA    | 0     |
| S11-final-viral-combined_k141_300027] | [full | 4204  | No  | NA   | 0 | 3 | Low-quality    | Genome-fragment | 2.37  | 0     |
| S17-final-viral-combined_k141_257221] | [full | 4204  | No  | NA   | 0 | 2 | Low-quality    | Genome-fragment | 1.92  | 0     |
| S17-final-viral-combined_k141_263886] | [full | 4205  | No  | NA   | 0 | 2 | Low-quality    | Genome-fragment | 4.4   | 0     |
| S2_k141_18580                         |       | 4205  | No  | NA   | 0 | 1 | Low-quality    | Genome-fragment | 1.19  | 0     |
| S2-final-viral-combined_k141_225668]  | [full | 4835  | No  | NA   | 0 | 0 | Not-determined | Genome-fragment | NA    | 0     |
| S2-final-viral-combined_k141_216331]  | [full | 1843  | No  | NA   | 0 | 0 | Not-determined | Genome-fragment | NA    | 0     |
| S2-final-viral-combined_k141_17669]   | [full | 1889  | No  | NA   | 0 | 0 | Not-determined | Genome-fragment | NA    | 0     |
| S2-final-viral-combined_k141_82252]   | [full | 2490  | No  | NA   | 0 | 0 | Not-determined | Genome-fragment | NA    | 0     |
| S17-final-viral-combined_k141_18940]  | [full | 4207  | No  | NA   | 3 | 0 | Low-quality    | Genome-fragment | 8.08  | 0     |
| S2-final-viral-combined_k141_76821]   | [full | 1577  | No  | NA   | 0 | 1 | Not-determined | Genome-fragment | NA    | 0     |
| S2-final-viral-combined_k141_144616]  | [full | 5182  | No  | NA   | 0 | 2 | Not-determined | Genome-fragment | NA    | 0     |
| S2_k141_207854                        |       | 4207  | No  | NA   | 0 | 2 | Low-quality    | Genome-fragment | 6.97  | 0     |
| S5-final-viral-combined_k141_121238]  | [full | 4208  | No  | NA   | 0 | 0 | Low-quality    | Genome-fragment | 2.66  | 0     |
| S2-final-viral-combined_k141_103443]  | [full | 1149  | No  | NA   | 0 | 0 | Not-determined | Genome-fragment | NA    | 0     |
| S5-final-viral-combined_k141_96888]   | [full | 4208  | No  | NA   | 0 | 1 | Low-quality    | Genome-fragment | 2.79  | 0     |
| S2-final-viral-combined_k141_1714]    | [full | 3030  | No  | NA   | 0 | 0 | Not-determined | Genome-fragment | NA    | 0     |
| S6_k141_137430                        |       | 4208  | No  | NA   | 0 | 1 | Low-quality    | Genome-fragment | 1.67  | 0     |
| S1_k141_347713                        |       | 4209  | No  | NA   | 0 | 0 | Low-quality    | Genome-fragment | 2.6   | 0     |
| S2-final-viral-combined_k141_216304]  | [full | 2026  | No  | NA   | 0 | 2 | Not-determined | Genome-fragment | NA    | 0     |
| S2-final-viral-combined_k141_245451]  | [full | 1112  | No  | NA   | 0 | 1 | Not-determined | Genome-fragment | NA    | 0     |
| S17-final-viral-combined_k141_167086] | [full | 4210  | No  | NA   | 0 | 2 | Low-quality    | Genome-fragment | 6.03  | 0     |
| S17-final-viral-combined_k141_131244] | [full | 4210  | No  | NA   | 0 | 4 | Low-quality    | Genome-fragment | 1.88  | 0     |
| S6-final-viral-combined_k141_161818]  | [full | 4210  | No  | NA   | 0 | 2 | Low-quality    | Genome-fragment | 0.2   | 0     |
| S3-final-viral-combined_k141_93252]   | [full | 4211  | Yes | 438  | 1 | 2 | Low-quality    | Genome-fragment | 0.28  | 89.6  |
| S2-final-viral-combined_k141_112393]  | [full | 1619  | No  | NA   | 0 | 0 | Not-determined | Genome-fragment | NA    | 0     |
| S2_k141_146120                        |       | 4211  | No  | NA   | 0 | 1 | Low-quality    | Genome-fragment | 14.68 | 0     |
| S5-final-viral-combined_k141_23433]   | [full | 4212  | No  | NA   | 1 | 0 | Low-quality    | Genome-fragment | 10.34 | 0     |
| S2-final-viral-combined_k141_132565]  | [full | 2474  | No  | NA   | 0 | 2 | Not-determined | Genome-fragment | NA    | 0     |
| S2-final-viral-combined_k141_103504]  | [full | 4993  | No  | NA   | 0 | 3 | Not-determined | Genome-fragment | NA    | 0     |
| S12_k141_38550                        |       | 4212  | No  | NA   | 0 | 0 | Low-quality    | Genome-fragment | 9     | 0     |
| S2-final-viral-combined_k141_132570]  | [full | 1869  | No  | NA   | 0 | 0 | Not-determined | Genome-fragment | NA    | 0     |
| S2-final-viral-combined_k141_216331]  | [full | 2242  | No  | NA   | 0 | 2 | Not-determined | Genome-fragment | NA    | 0     |
| S2-final-viral-combined_k141_186929]  | [full | 1982  | No  | NA   | 0 | 2 | Not-determined | Genome-fragment | NA    | 0     |
| S2-final-viral-combined_k141_196500]  | [full | 1118  | No  | NA   | 0 | 1 | Not-determined | Genome-fragment | NA    | 0     |
| S2-final-viral-combined_k141_186112]  | [full | 2387  | No  | NA   | 0 | 1 | Not-determined | Genome-fragment | NA    | 0     |
| S2-final-viral-combined_k141_93135]   | [full | 1001  | No  | NA   | 0 | 1 | Not-determined | Genome-fragment | NA    | 0     |
| S2-final-viral-combined_k141_196549]  | [full | 2510  | No  | NA   | 0 | 1 | Not-determined | Genome-fragment | NA    | 0     |
| S17-final-viral-combined_k141_244577] | [full | 4213  | No  | NA   | 1 | 0 | Low-quality    | Genome-fragment | 3.04  | 0     |
| S2-final-viral-combined_k141_196574]  | [full | 3273  | No  | NA   | 0 | 2 | Not-determined | Genome-fragment | NA    | 0     |
| S17-final-viral-combined_k141_195978] | [full | 4213  | No  | NA   | 0 | 1 | Low-quality    | Genome-fragment | 12.87 | 0     |
| S6-final-viral-combined_k141_138089]  | [full | 4213  | No  | NA   | 3 | 0 | Low-quality    | Genome-fragment | 4.06  | 0     |
| S2-final-viral-combined_k141_20176]   | [full | 1041  | No  | NA   | 0 | 2 | Not-determined | Genome-fragment | NA    | 0     |
| S2-final-viral-combined_k141_82408]   | [full | 6604  | No  | NA   | 0 | 1 | Not-determined | Genome-fragment | NA    | 0     |
| S2-final-viral-combined_k141_196599]  | [full | 1103  | No  | NA   | 0 | 0 | Not-determined | Genome-fragment | NA    | 0     |
| S7_k141_129045                        |       | 4214  | No  | NA   | 1 | 0 | Low-quality    | Genome-fragment | 2.29  | 0     |
| S1_k141_154305                        |       | 4215  | No  | NA   | 0 | 0 | Low-quality    | Genome-fragment | 4.96  | 0     |
| S5-final-viral-combined_k141_171816]  | [full | 4216  | No  | NA   | 0 | 2 | Low-quality    | Genome-fragment | 8.25  | 0     |
| S2-final-viral-combined_k141_62002]   | [full | 3307  | No  | NA   | 0 | 4 | Not-determined | Genome-fragment | NA    | 0     |
| S2-final-viral-combined_k141_132681]  | [full | 1094  | No  | NA   | 0 | 1 | Not-determined | Genome-fragment | NA    | 0     |
| S2-final-viral-combined_k141_820341]  | [full | 1393  | No  | NA   | 0 | 1 | Not-determined | Genome-fragment | NA    | 0     |
| S2-final-viral-combined_k141_204808]  | [full | 2519  | No  | NA   | 0 | 0 | Not-determined | Genome-fragment | NA    | 0     |
| S2-final-viral-combined_k141_245564]  | [full | 1260  | No  | NA   | 0 | 2 | Not-determined | Genome-fragment | NA    | 0     |
| S12_k141_114676                       |       | 4217  | No  | NA   | 0 | 1 | Low-quality    | Genome-fragment | 6.48  | 0     |
| S4-final-viral-combined_k141_122507]  | [full | 4217  | No  | NA   | 0 | 3 | Low-quality    | Genome-fragment | 0.68  | 0     |
| S2-final-viral-combined_k141_144742]  | [full | 4477  | No  | NA   | 0 | 0 | Not-determined | Genome-fragment | NA    | 0     |
| S2-final-viral-combined_k141_204829]  | [full | 2838  | No  | NA   | 0 | 2 | Not-determined | Genome-fragment | NA    | 0     |
| S2-final-viral-combined_k141_164510]  | [full | 4452  | No  | NA   | 0 | 3 | Not-determined | Genome-fragment | NA    | 0     |
| S5-final-viral-combined_k141_28044]   | [full | 4218  | No  | NA   | 0 | 2 | Low-quality    | Genome-fragment | 3.78  | 0     |
| S2-final-viral-combined_k141_20260]   | [full | 2208  | No  | NA   | 0 | 0 | Not-determined | Genome-fragment | NA    | 0     |
| S1-final-viral-combined_k141_78167]   | [full | 4219  | No  | NA   | 0 | 0 | Low-quality    | Genome-fragment | 2.25  | 0     |
| S2-final-viral-combined_k141_103553]  | [full | 1218  | No  | NA   | 0 | 0 | Not-determined | Genome-fragment | NA    | 0     |
| S3-final-viral-combined_k141_1526]    | [full | 4220  | No  | NA   | 0 | 1 | Low-quality    | Genome-fragment | 5.87  | 0     |
| S2-final-viral-combined_k141_141200]  | [full | 4220  | No  | NA   | 0 | 2 | Low-quality    | Genome-fragment | 2.9   | 0     |
| S2-final-viral-combined_k141_93143]   | [full | 11977 | No  | NA   | 0 | 6 | Not-determined | Genome-fragment | NA    | 0     |
| S2-final-viral-combined_k141_132842]  | [full | 1090  | No  | NA   | 0 | 0 | Not-determined | Genome-fragment | NA    | 0     |
| S2-final-viral-combined_k141_93148]   | [full | 2581  | No  | NA   | 0 | 1 | Low-quality    | Genome-fragment | NA    | 0     |
| S4_k141_8613                          |       | 4221  | Yes | 2113 | 1 | 0 | Low-quality    | Genome-fragment | 2.62  | 49.94 |
| S2-final-viral-combined_k141_155173]  | [full | 1256  | No  | NA   | 0 | 0 | Not-determined | Genome-fragment | NA    | 0     |
| S11_k141_243932                       |       | 4222  | No  | NA   | 0 | 1 | Low-quality    | Genome-fragment | 2.98  | 0     |
| S1_k141_265942                        |       | 4222  | No  | NA   | 0 | 1 | Low-quality    | Genome-fragment | 9.08  | 0     |
| S2-final-viral-combined_k141_196708]  | [full | 1315  | No  | NA   | 0 | 0 | Not-determined | Genome-fragment | NA    | 0     |
| S12-final-viral-combined_k141_254747] | [full | 4223  | No  | NA   | 0 | 3 | Low-quality    | Genome-fragment | 1.29  | 0     |
| S17-final-viral-combined_k141_3468]   | [full | 4224  | No  | NA   | 0 | 0 | Low-quality    | Genome-fragment | 9.32  | 0     |
| S11_k141_32929                        |       | 4225  | No  | NA   | 1 | 0 | Low-quality    | Genome-fragment | 3.18  | 0     |
| S2-final-viral-combined_k141_132901]  | [full | 2268  | No  | NA   | 0 | 1 | Not-determined | Genome-fragment | NA    | 0     |
| S17-final-viral-combined_k141_244073] | [full | 4225  | No  | NA   | 0 | 1 | Low-quality    | Genome-fragment | 1.17  | 0     |
| S11-final-viral-combined_k141_166600] | [full | 4226  | Yes | 2903 | 5 | 1 | Low-quality    | Genome-fragment | 6.81  | 31.31 |
| S2-final-viral-combined_k141_245680]  | [full | 7487  | No  | NA   | 0 | 5 | Not-determined | Genome-fragment | NA    | 0     |
| S4-final-viral-combined_k141_134762]  | [full |       |     |      |   |   |                |                 |       |       |



|                                      |          |        |     |      |    |   |                |                 |       |       |
|--------------------------------------|----------|--------|-----|------|----|---|----------------|-----------------|-------|-------|
| 58-final-viral-combined_k141_220991  | [full]   | 4238   | No  | NA   | 0  | 1 | Low-quality    | Genome-fragment | 6.37  | 0     |
| 52-final-viral-combined_k141_226022  | [full]   | 1038   | No  | NA   | 1  | 0 | Not-determined | Genome-fragment | NA    | 0     |
| 511-final-viral-combined_k141_179179 | [full]   | 4239   | No  | NA   | 3  | 0 | Low-quality    | Genome-fragment | 9.33  | 0     |
| 53-final-viral-combined_k141_235801  | [full]   | 4240   | No  | NA   | 0  | 3 | Low-quality    | Genome-fragment | 3.03  | 0     |
| 55-final-viral-combined_k141_279481  | [full]   | 4240   | No  | NA   | 0  | 1 | Low-quality    | Genome-fragment | 7.49  | 0     |
| 52-final-viral-combined_k141_216934  | [full]   | 2949   | No  | NA   | 0  | 1 | Not-determined | Genome-fragment | NA    | 0     |
| 52-final-viral-combined_k141_112795  | [full]   | 1148   | No  | NA   | 0  | 0 | Not-determined | Genome-fragment | NA    | 0     |
| 52-final-viral-combined_k141_112809  | [full]   | 1271   | No  | NA   | 0  | 1 | Not-determined | Genome-fragment | NA    | 0     |
| 52-final-viral-combined_k141_226117  | [full]   | 3400   | No  | NA   | 0  | 1 | Not-determined | Genome-fragment | NA    | 0     |
| 57-final-viral-combined_k141_196798  | [full]   | 4240   | No  | NA   | 2  | 0 | Low-quality    | Genome-fragment | 6.7   | 0     |
| 58-final-viral-combined_k141_2840    | [full]   | 4240   | No  | NA   | 0  | 1 | Low-quality    | Genome-fragment | 0.49  | 0     |
| 52-final-viral-combined_k141_132926  | [full]   | 3325   | No  | NA   | 0  | 1 | Not-determined | Genome-fragment | NA    | 0     |
| 52-final-viral-combined_k141_164434  | [full]   | 2987   | No  | NA   | 0  | 3 | Not-determined | Genome-fragment | NA    | 0     |
| 52-final-viral-combined_k141_7770    | [full]   | 2460   | No  | NA   | 0  | 0 | Not-determined | Genome-fragment | NA    | 0     |
| 511-final-viral-combined_k141_153340 | [full]   | 4241   | No  | NA   | 0  | 2 | Low-quality    | Genome-fragment | 4.58  | 0     |
| 511-final-viral-combined_k141_198518 | [full]   | 4241   | No  | NA   | 0  | 1 | Low-quality    | Genome-fragment | 9.41  | 0     |
| 52-final-viral-combined_k141_124270  | [full]   | 1712   | No  | NA   | 0  | 1 | Not-determined | Genome-fragment | NA    | 0     |
| 57-final-viral-combined_k141_145998  | [full]   | 4241   | Yes | 2909 | 1  | 1 | Not-determined | Genome-fragment | 4.18  | 31.41 |
| 512_k141_201582                      | [full]   | 4241   | No  | NA   | 0  | 0 | Low-quality    | Genome-fragment | 16.02 | 0     |
| 56-final-viral-combined_k141_130033  | [full]   | 4241   | No  | NA   | 0  | 3 | Low-quality    | Genome-fragment | 1.97  | 0     |
| 52-final-viral-combined_k141_7839    | [full]   | 1755   | No  | NA   | 0  | 0 | Not-determined | Genome-fragment | NA    | 0     |
| 52-final-viral-combined_k141_291601  | [full]   | 1519   | No  | NA   | 0  | 1 | Not-determined | Genome-fragment | NA    | 0     |
| 52-final-viral-combined_k141_226332  | [full]   | 1414   | No  | NA   | 0  | 1 | Not-determined | Genome-fragment | NA    | 0     |
| 53-final-viral-combined_k141_22449   | [full]   | 4243   | No  | NA   | 0  | 0 | Low-quality    | Genome-fragment | 7.59  | 0     |
| 52-final-viral-combined_k141_217357  | [full]   | 1292   | No  | NA   | 0  | 0 | Not-determined | Genome-fragment | NA    | 0     |
| 52-final-viral-combined_k141_205287  | [full]   | 1361   | No  | NA   | 0  | 1 | Not-determined | Genome-fragment | NA    | 0     |
| 52-final-viral-combined_k141_217462  | [full]   | 1038   | No  | NA   | 0  | 0 | Not-determined | Genome-fragment | NA    | 0     |
| 52-final-viral-combined_k141_217174  | [full]   | 1725   | No  | NA   | 0  | 0 | Not-determined | Genome-fragment | NA    | 0     |
| 54-final-viral-combined_k141_268541  | [full]   | 4243   | No  | NA   | 1  | 0 | Low-quality    | Genome-fragment | 11.43 | 0     |
| 54_k141_29291                        |          | 4243   | No  | NA   | 0  | 3 | Low-quality    | Genome-fragment | 0.73  | 0     |
| 54_k141_58829                        |          | 4243   | Yes | 602  | 1  | 2 | Low-quality    | Genome-fragment | 1.3   | 85.81 |
| 52-final-viral-combined_k141_217489  | [full]   | 1253   | No  | NA   | 0  | 1 | Not-determined | Genome-fragment | NA    | 0     |
| 52-final-viral-combined_k141_7919    | [full]   | 3211   | No  | NA   | 0  | 1 | Not-determined | Genome-fragment | NA    | 0     |
| 52-final-viral-combined_k141_226455  | [full]   | 1976   | No  | NA   | 0  | 2 | Not-determined | Genome-fragment | NA    | 0     |
| 58_k141_37108                        |          | 4243   | No  | NA   | 1  | 0 | Low-quality    | Genome-fragment | 11.67 | 0     |
| 52-final-viral-combined_k141_29231   | [full]   | 2788   | No  | NA   | 0  | 1 | Not-determined | Genome-fragment | NA    | 0     |
| 52-final-viral-combined_k141_217219  | [full]   | 1820   | No  | NA   | 0  | 2 | Not-determined | Genome-fragment | NA    | 0     |
| 52-final-viral-combined_k141_164477  | [full]   | 5108   | No  | NA   | 0  | 3 | Not-determined | Genome-fragment | NA    | 0     |
| 52-final-viral-combined_k141_292329  | [full]   | 4801   | No  | NA   | 0  | 0 | Not-determined | Genome-fragment | NA    | 0     |
| 52-final-viral-combined_k141_29241   | [full]   | 1624   | No  | NA   | 0  | 0 | Not-determined | Genome-fragment | NA    | 0     |
| 59_k141_10606                        |          | 4244   | No  | NA   | 4  | 0 | Low-quality    | Genome-fragment | 10.27 | 0     |
| 52-final-viral-combined_k141_164738  | [full]   | 2822   | No  | NA   | 0  | 3 | Not-determined | Genome-fragment | NA    | 0     |
| 54-final-viral-combined_k141_17033   | [full]   | 4244   | No  | NA   | 2  | 0 | Low-quality    | Genome-fragment | 11.27 | 0     |
| 51-final-viral-combined_k141_213012  | [full]   | 4246   | No  | NA   | 3  | 0 | Low-quality    | Genome-fragment | 7.3   | 0     |
| 52-final-viral-combined_k141_226508  | [full]   | 2794   | No  | NA   | 0  | 0 | Not-determined | Genome-fragment | NA    | 0     |
| 52-final-viral-combined_k141_113139  | [full]   | 1002   | No  | NA   | 0  | 0 | Not-determined | Genome-fragment | NA    | 0     |
| 52-final-viral-combined_k141_113146  | [full]   | 1032   | No  | NA   | 0  | 0 | Not-determined | Genome-fragment | NA    | 0     |
| 52-final-viral-combined_k141_205507  | [full]   | 2439   | No  | NA   | 0  | 0 | Not-determined | Genome-fragment | NA    | 0     |
| 512-final-viral-combined_k141_358572 | [full]   | 4246   | No  | NA   | 7  | 0 | Low-quality    | Genome-fragment | 2.26  | 0     |
| 512-final-viral-combined_k141_399616 | [full]   | 4246   | No  | NA   | 6  | 0 | Low-quality    | Genome-fragment | 6.77  | 0     |
| 58-final-viral-combined_k141_118353  | [full]   | 4246   | No  | NA   | 2  | 0 | Low-quality    | Genome-fragment | 11.4  | 0     |
| 52-final-viral-combined_k141_205535  | [full]   | 7256   | No  | NA   | 6  | 0 | Not-determined | Genome-fragment | NA    | 0     |
| 51-final-viral-combined_k141_389605  | [full]   | 4247   | No  | NA   | 0  | 4 | Low-quality    | Genome-fragment | 5.11  | 0     |
| 57-final-viral-combined_k141_551761  | [full]   | 4247   | No  | NA   | 0  | 1 | Low-quality    | Genome-fragment | 3.1   | 0     |
| 54-final-viral-combined_k141_132144  | [H2gene] | 4247   | No  | NA   | 0  | 0 | Low-quality    | Genome-fragment | 4.12  | 0     |
| 52-final-viral-combined_k141_164859  | [full]   | 1070   | No  | NA   | 0  | 2 | Not-determined | Genome-fragment | NA    | 0     |
| 511_k141_124077                      |          | 4248   | No  | NA   | 0  | 0 | Low-quality    | Genome-fragment | 8.11  | 0     |
| 52-final-viral-combined_k141_217364  | [full]   | 1782   | No  | NA   | 0  | 2 | Not-determined | Genome-fragment | NA    | 0     |
| 52-final-viral-combined_k141_113279  | [full]   | 1365   | No  | NA   | 1  | 0 | Not-determined | Genome-fragment | NA    | 0     |
| 57_k141_204707                       |          | 4248   | No  | NA   | 0  | 0 | Low-quality    | Genome-fragment | 3.99  | 0     |
| 517_k141_162669                      |          | 4249   | No  | NA   | 1  | 0 | Low-quality    | Genome-fragment | 10.71 | 0     |
| 511-final-viral-combined_k141_93237  | [full]   | 4250   | No  | NA   | 1  | 0 | Low-quality    | Genome-fragment | 2.57  | 0     |
| 51_k141_2265                         |          | 4250   | No  | NA   | 0  | 3 | Low-quality    | Genome-fragment | 2.76  | 0     |
| 52-final-viral-combined_k141_246243  | [full]   | 1454   | No  | NA   | 0  | 2 | Not-determined | Genome-fragment | NA    | 0     |
| 52-final-viral-combined_k141_29399   | [full]   | 114429 | No  | NA   | 3  | 1 | Not-determined | Genome-fragment | NA    | 0     |
| 59-final-viral-combined_k141_74512   | [full]   | 4252   | No  | NA   | 0  | 1 | Low-quality    | Genome-fragment | 2.08  | 0     |
| 52-final-viral-combined_k141_226780  | [full]   | 2424   | No  | NA   | 0  | 1 | Not-determined | Genome-fragment | NA    | 0     |
| 58-final-viral-combined_k141_155563  | [full]   | 4253   | No  | NA   | 1  | 0 | Low-quality    | Genome-fragment | 7.96  | 0     |
| 52-final-viral-combined_k141_205720  | [full]   | 1373   | No  | NA   | 0  | 0 | Not-determined | Genome-fragment | NA    | 0     |
| 517-final-viral-combined_k141_199786 | [full]   | 4254   | No  | NA   | 0  | 4 | Low-quality    | Genome-fragment | 3.11  | 0     |
| 511-final-viral-combined_k141_37681  | [full]   | 4257   | No  | NA   | 4  | 0 | Low-quality    | Genome-fragment | 9.48  | 0     |
| 52-final-viral-combined_k141_294761  | [full]   | 1257   | No  | NA   | 0  | 0 | Not-determined | Genome-fragment | NA    | 0     |
| 52-final-viral-combined_k141_205725  | [full]   | 2943   | No  | NA   | 0  | 1 | Not-determined | Genome-fragment | NA    | 0     |
| 52-final-viral-combined_k141_205727  | [full]   | 5575   | No  | NA   | 0  | 3 | Not-determined | Genome-fragment | NA    | 0     |
| 52-final-viral-combined_k141_8112    | [full]   | 1126   | No  | NA   | 0  | 0 | Not-determined | Genome-fragment | NA    | 0     |
| 511_k141_4704                        |          | 4257   | No  | NA   | 0  | 1 | Low-quality    | Genome-fragment | 9.17  | 0     |
| 58-final-viral-combined_k141_209841  | [full]   | 4257   | No  | NA   | 1  | 0 | Low-quality    | Genome-fragment | 6.9   | 0     |
| 52-final-viral-combined_k141_29561   | [full]   | 3042   | No  | NA   | 0  | 4 | Not-determined | Genome-fragment | NA    | 0     |
| 52-final-viral-combined_k141_246321  | [full]   | 1068   | No  | NA   | 0  | 0 | Not-determined | Genome-fragment | NA    | 0     |
| 59-final-viral-combined_k141_126819  | [full]   | 4258   | Yes | 3151 | 1  | 1 | Low-quality    | Genome-fragment | 5.64  | 26    |
| 52-final-viral-combined_k141_226896  | [full]   | 2165   | No  | NA   | 0  | 0 | Not-determined | Genome-fragment | NA    | 0     |
| 52-final-viral-combined_k141_165169  | [full]   | 2274   | No  | NA   | 0  | 0 | Not-determined | Genome-fragment | NA    | 0     |
| 52-final-viral-combined_k141_165171  | [full]   | 2595   | No  | NA   | 0  | 3 | Not-determined | Genome-fragment | NA    | 0     |
| 52-final-viral-combined_k141_8232    | [full]   | 4905   | No  | NA   | 0  | 1 | Not-determined | Genome-fragment | NA    | 0     |
| 511-final-viral-combined_k141_275586 | [full]   | 4258   | No  | NA   | 0  | 2 | Low-quality    | Genome-fragment | 7.54  | 0     |
| 57_k141_206191                       |          | 4258   | No  | NA   | 0  | 1 | Low-quality    | Genome-fragment | 2.27  | 0     |
| 52-final-viral-combined_k141_205807  | [full]   | 2861   | No  | NA   | 0  | 3 | Not-determined | Genome-fragment | NA    | 0     |
| 52-final-viral-combined_k141_113432  | [full]   | 1750   | No  | NA   | 0  | 2 | Not-determined | Genome-fragment | NA    | 0     |
| 57_k141_207919                       |          | 4258   | No  | NA   | 4  | 0 | Low-quality    | Genome-fragment | 7.08  | 0     |
| 52-final-viral-combined_k141_226978  | [full]   | 1024   | No  | NA   | 0  | 0 | Not-determined | Genome-fragment | NA    | 0     |
| 52-final-viral-combined_k141_113463  | [full]   | 1920   | No  | NA   | 0  | 1 | Not-determined | Genome-fragment | NA    | 0     |
| 517-final-viral-combined_k141_200726 | [full]   | 4258   | No  | NA   | 0  | 0 | Low-quality    | Genome-fragment | 5.15  | 0     |
| 52-final-viral-combined_k141_113475  | [full]   | 2141   | No  | NA   | 0  | 0 | Not-determined | Genome-fragment | NA    | 0     |
| 512-final-viral-combined_k141_158265 | [full]   | 4258   | No  | NA   | 0  | 1 | Low-quality    | Genome-fragment | 5.54  | 0     |
| 59_k141_108578                       |          | 4260   | No  | NA   | 4  | 0 | Not-determined | Genome-fragment | 9.13  | 0     |
| 52-final-viral-combined_k141_113486  | [full]   | 1386   | No  | NA   | 0  | 1 | Not-determined | Genome-fragment | NA    | 0     |
| 52-final-viral-combined_k141_227056  | [full]   | 1251   | No  | NA   | 0  | 1 | Not-determined | Genome-fragment | NA    | 0     |
| 52-final-viral-combined_k141_226623  | [full]   | 1380   | No  | NA   | 0  | 0 | Not-determined | Genome-fragment | NA    | 0     |
| 52-final-viral-combined_k141_227064  | [full]   | 1313   | No  | NA   | 0  | 1 | Not-determined | Genome-fragment | NA    | 0     |
| 511_k141_282779                      |          | 4260   | No  | NA   | 0  | 0 | Low-quality    | Genome-fragment | 6.36  | 0     |
| 55-final-viral-combined_k141_90407   | [full]   | 4260   | No  | NA   | 0  | 1 | Low-quality    | Genome-fragment | 0.84  | 0     |
| 512-final-viral-combined_k141_335106 | [full]   | 4260   | Yes | 667  | 0  | 7 | Low-quality    | Genome-fragment | 1.41  | 84.34 |
| 52-final-viral-combined_k141_113521  | [full]   | 5296   | No  | NA   | 1  | 4 | Not-determined | Genome-fragment | NA    | 0     |
| 52-final-viral-combined_k141_227099  | [full]   | 1719   | No  | NA   | 0  | 1 | Not-determined | Genome-fragment | NA    | 0     |
| 52-final-viral-combined_k141_165184  | [full]   | 3098   | No  | NA   | 0  | 2 | Not-determined | Genome-fragment | NA    | 0     |
| 52-final-viral-combined_k141_113535  | [full]   | 2434   | No  | NA   | 0  | 2 | Not-determined | Genome-fragment | NA    | 0     |
| 52-final-viral-combined_k141_29690   | [full]   | 1979   | No  | NA   | 0  | 1 | Not-determined | Genome-fragment | NA    | 0     |
| 52-final-viral-combined_k141_113643  | [full]   | 2793   | No  | NA   | 0  | 0 | Not-determined | Genome-fragment | NA    | 0     |
| 52-final-viral-combined_k141_205991  | [full]   | 1439   | No  | NA   | 0  | 0 | Not-determined | Genome-fragment | NA    | 0     |
| 52-final-viral-combined_k141_297141  | [full]   | 1217   | No  | NA   | 0  | 1 | Not-determined | Genome-fragment | NA    | 0     |
| 52-final-viral-combined_k141_227127  | [full]   | 1579   | No  | NA   | 0  | 0 | Not-determined | Genome-fragment | NA    | 0     |
| 52-final-viral-combined_k141_246480  | [full]   | 3082   | No  | NA   | 17 | 0 | Medium-quality | Genome-fragment | 66.75 | 0     |
| 52-final-viral-combined_k141_8340    | [full]   | 2424   | No  | NA   | 0  | 3 | Not-determined | Genome-fragment | NA    | 0     |
| 512_k141_338199                      |          | 4260   | No  | NA   | 0  | 3 | Low-quality    | Genome-fragment | 1.59  | 0     |
| 52-final-viral-combined_k141_165482  | [full]   | 4714   | No  | NA   | 0  | 0 | Not-determined | Genome-fragment | NA    | 0     |
| 52-final-viral-combined_k141_10277   | [full]   | 4260   | No  | NA   | 0  | 3 | Low-quality    | Genome-fragment | 1.47  | 0     |
| 52-final-viral-combined_k141_165503  | [full]   | 3371   | No  | NA   | 0  | 2 | Not-determined | Genome-fragment | NA    | 0     |
| 52-final-viral-combined_k141_113619  | [full]   | 45883  | No  | NA   | 15 | 2 | High-quality   | High-quality    | 90.89 | 0     |
| 52-final-viral-combined_k141_8388    | [full]   | 1099   | No  | NA   | 0  | 1 | Not-determined | Genome-fragment | NA    | 0     |
| 511-final-viral-combined_k141_43404  | [full]   | 4261   | No  | NA   | 0  | 5 | Low-quality    | Genome-fragment | 4.2   | 0     |
| 512_k141_125279                      |          | 4262   | No  | NA   | 1  | 0 | Low-quality    | Genome-fragment | 10.69 | 0     |
| 52-final-viral-combined_k141_227244  | [full]   | 1228   | No  | NA   | 0  | 1 | Not-determined | Genome-fragment | NA    | 0     |
| 59-final-viral-combined_k141_227262  | [full]   | 4264   | No  | NA   | 0  | 2 | Low-quality    | Genome-fragment | 1.5   | 0     |
| 52-final-viral-combined_k141_133746  | [full]   | 3275   | No  | NA   | 0  | 1 | Not-determined | Genome-fragment | NA    | 0     |
| 517_k141_59632                       |          | 4264   | No  | NA   | 0  | 2 | Low-quality    | Genome-fragment | 0.37  | 0     |
| 52-final-viral-combined_k141_227313  | [full]   | 8866   | No  | NA   | 0  | 6 | Not-determined | Genome-fragment | NA    | 0     |
| 52-final-viral-combined_k141_227317  | [full]   | 2074   | No  | NA   | 0  | 2 | Not-determined | Genome-fragment | NA    | 0     |
| 59_k141_49062                        |          | 4265   | No  | NA   | 0  | 1 | Low-quality    | Genome-fragment | 7.93  | 0     |
| 52-final-viral-combined_k141_29862   | [full]   | 1720   | No  | NA   | 0  | 0 | Not-determined | Genome-fragment |       |       |



|                                      |             |       |     |       |    |    |                |                 |    |       |
|--------------------------------------|-------------|-------|-----|-------|----|----|----------------|-----------------|----|-------|
| S2-final-viral-combined_k141_206698  | [full]      | 3858  | No  | NA    | 0  | 1  | Not-determined | Genome-fragment | NA | 0     |
| S2-final-viral-combined_k141_2067    | [full]      | 1329  | No  | NA    | 0  | 2  | Not-determined | Genome-fragment | NA | 0     |
| S2-final-viral-combined_k141_227800  | [full]      | 36179 | Yes | 21073 | 11 | 6  | Medium-quality | Genome-fragment | NA | 58.22 |
| S12_k141_362088                      |             | 4284  | No  | NA    | 1  | 0  | Low-quality    | Genome-fragment | NA | 13.3  |
| S4-final-viral-combined_k141_76185   | [full]      | 4284  | No  | NA    | 3  | 0  | Low-quality    | Genome-fragment | NA | 8.89  |
| S11-final-viral-combined_k141_139681 | [full]      | 4285  | No  | NA    | 0  | 2  | Low-quality    | Genome-fragment | NA | 0.69  |
| S2-final-viral-combined_k141_30654   | [full]      | 1835  | No  | NA    | 0  | 0  | Not-determined | Genome-fragment | NA | 0     |
| S2-final-viral-combined_k141_8780    | [full]      | 1588  | No  | NA    | 0  | 2  | Not-determined | Genome-fragment | NA | 0     |
| S2-final-viral-combined_k141_134010  | [full]      | 2118  | No  | NA    | 0  | 1  | Not-determined | Genome-fragment | NA | 0     |
| S11-final-viral-combined_k141_91705  | [full]      | 4285  | No  | NA    | 0  | 2  | Low-quality    | Genome-fragment | NA | 2.46  |
| S6-final-viral-combined_k141_106758  | [full]      | 4285  | No  | NA    | 0  | 2  | Low-quality    | Genome-fragment | NA | 5.06  |
| S1-final-viral-combined_k141_241021  | [full]      | 4286  | No  | NA    | 0  | 2  | Low-quality    | Genome-fragment | NA | 4.42  |
| S2-final-viral-combined_k141_30750   | [full]      | 75512 | No  | NA    | 1  | 20 | Medium-quality | Genome-fragment | NA | 50.76 |
| S2-final-viral-combined_k141_170168  | [full]      | 4286  | No  | NA    | 0  | 0  | Low-quality    | Genome-fragment | NA | 10.64 |
| S17_k141_137981                      |             | 4286  | No  | NA    | 0  | 2  | Low-quality    | Genome-fragment | NA | 6.63  |
| S2-final-viral-combined_k141_8962    | [full]      | 1581  | No  | NA    | 0  | 1  | Not-determined | Genome-fragment | NA | 0     |
| S2-final-viral-combined_k141_247268  | [full]      | 2787  | No  | NA    | 0  | 2  | Not-determined | Genome-fragment | NA | 0     |
| S2-final-viral-combined_k141_20796   | [full]      | 2425  | No  | NA    | 0  | 1  | Not-determined | Genome-fragment | NA | 0     |
| S12-final-viral-combined_k141_114001 | [full]      | 4286  | No  | NA    | 0  | 4  | Low-quality    | Genome-fragment | NA | 1.63  |
| S2-final-viral-combined_k141_247318  | [full]      | 1387  | No  | NA    | 0  | 0  | Not-determined | Genome-fragment | NA | 0     |
| S7-final-viral-combined_k141_218726  | [full]      | 4287  | No  | NA    | 0  | 3  | Low-quality    | Genome-fragment | NA | 9.73  |
| S2-final-viral-combined_k141_247383  | [full]      | 1502  | No  | NA    | 0  | 2  | Not-determined | Genome-fragment | NA | 0     |
| S12-final-viral-combined_k141_118186 | [full]      | 4287  | No  | NA    | 1  | 0  | Low-quality    | Genome-fragment | NA | 9     |
| S2-final-viral-combined_k141_247404  | [full]      | 2040  | No  | NA    | 0  | 1  | Not-determined | Genome-fragment | NA | 0     |
| S6_k141_112731                       |             | 4287  | No  | NA    | 1  | 0  | Low-quality    | Genome-fragment | NA | 9.84  |
| S8_k141_25891                        |             | 4287  | No  | NA    | 1  | 0  | Low-quality    | Genome-fragment | NA | 11.87 |
| S2-final-viral-combined_k141_247494  | [full]      | 2502  | No  | NA    | 0  | 1  | Not-determined | Genome-fragment | NA | 0     |
| S2-final-viral-combined_k141_9160    | [full]      | 3106  | No  | NA    | 0  | 3  | Not-determined | Genome-fragment | NA | 0     |
| S2-final-viral-combined_k141_206891  | [full]      | 1291  | No  | NA    | 0  | 0  | Not-determined | Genome-fragment | NA | 0     |
| S2-final-viral-combined_k141_206841  | [full]      | 4159  | No  | NA    | 0  | 2  | Not-determined | Genome-fragment | NA | 0     |
| S2-final-viral-combined_k141_206864  | [full]      | 1445  | No  | NA    | 0  | 1  | Not-determined | Genome-fragment | NA | 0     |
| S2-final-viral-combined_k141_247590  | [full]      | 1310  | No  | NA    | 0  | 0  | Not-determined | Genome-fragment | NA | 0     |
| S2-final-viral-combined_k141_247601  | [full]      | 2451  | No  | NA    | 0  | 1  | Not-determined | Genome-fragment | NA | 0     |
| S11_k141_72021                       |             | 4288  | No  | NA    | 2  | 0  | Low-quality    | Genome-fragment | NA | 10.58 |
| S2-final-viral-combined_k141_9202    | [full]      | 4656  | No  | NA    | 0  | 3  | Not-determined | Genome-fragment | NA | 0     |
| S2-final-viral-combined_k141_247697  | [full]      | 2210  | No  | NA    | 0  | 1  | Not-determined | Genome-fragment | NA | 0     |
| S2-final-viral-combined_k141_247699  | [full]      | 1709  | No  | NA    | 0  | 2  | Not-determined | Genome-fragment | NA | 0     |
| S5_k141_4201                         |             | 4288  | No  | NA    | 5  | 0  | Low-quality    | Genome-fragment | NA | 10.35 |
| S2-final-viral-combined_k141_247791  | [full]      | 2610  | No  | NA    | 0  | 2  | Not-determined | Genome-fragment | NA | 0     |
| S2-final-viral-combined_k141_9365    | [full]      | 2579  | No  | NA    | 0  | 2  | Not-determined | Genome-fragment | NA | 0     |
| S2-final-viral-combined_k141_247803  | [full]      | 32220 | No  | NA    | 0  | 18 | Not-determined | Genome-fragment | NA | 0     |
| S12-final-viral-combined_k141_57093  | [full]      | 4288  | No  | NA    | 0  | 0  | Low-quality    | Genome-fragment | NA | 11.7  |
| S2-final-viral-combined_k141_247826  | [full]      | 4380  | No  | NA    | 0  | 1  | Not-determined | Genome-fragment | NA | 0     |
| S2-final-viral-combined_k141_9462    | [full]      | 1813  | No  | NA    | 0  | 1  | Not-determined | Genome-fragment | NA | 0     |
| S2-final-viral-combined_k141_247915  | [full]      | 1266  | No  | NA    | 0  | 1  | Not-determined | Genome-fragment | NA | 0     |
| S2-final-viral-combined_k141_9498    | [full]      | 2182  | No  | NA    | 0  | 2  | Not-determined | Genome-fragment | NA | 0     |
| S2-final-viral-combined_k141_207036  | [full]      | 1814  | No  | NA    | 0  | 1  | Not-determined | Genome-fragment | NA | 0     |
| S2-final-viral-combined_k141_247998  | [full]      | 2969  | No  | NA    | 0  | 2  | Not-determined | Genome-fragment | NA | 0     |
| S2-final-viral-combined_k141_248071  | [full]      | 1983  | No  | NA    | 0  | 0  | Not-determined | Genome-fragment | NA | 0     |
| S2-final-viral-combined_k141_207090  | [full]      | 1281  | No  | NA    | 0  | 0  | Not-determined | Genome-fragment | NA | 0     |
| S2-final-viral-combined_k141_207108  | [full]      | 4966  | No  | NA    | 0  | 0  | Not-determined | Genome-fragment | NA | 0     |
| S11-final-viral-combined_k141_147571 | [full]      | 4289  | No  | NA    | 0  | 0  | Low-quality    | Genome-fragment | NA | 11.18 |
| S1-final-viral-combined_k141_99972   | [full]      | 4289  | No  | NA    | 0  | 4  | Low-quality    | Genome-fragment | NA | 3.48  |
| S2-final-viral-combined_k141_9644    | [full]      | 1898  | No  | NA    | 0  | 2  | Not-determined | Genome-fragment | NA | 0     |
| S2-final-viral-combined_k141_9665    | [full]      | 3303  | No  | NA    | 0  | 0  | Not-determined | Genome-fragment | NA | 0     |
| S17-final-viral-combined_k141_86412  | [full]      | 4289  | No  | NA    | 3  | 0  | Low-quality    | Genome-fragment | NA | 8.17  |
| S2-final-viral-combined_k141_248295  | [full]      | 1358  | No  | NA    | 0  | 1  | Not-determined | Genome-fragment | NA | 0     |
| S2-final-viral-combined_k141_9726    | [full]      | 5090  | No  | NA    | 0  | 0  | Not-determined | Genome-fragment | NA | 0     |
| S12-final-viral-combined_k141_165820 | [full]      | 4289  | No  | NA    | 0  | 1  | Low-quality    | Genome-fragment | NA | 2.47  |
| S2-final-viral-combined_k141_9888    | [full]      | 3600  | No  | NA    | 0  | 1  | Not-determined | Genome-fragment | NA | 0     |
| S2-final-viral-combined_k141_9974    | [full]      | 2043  | No  | NA    | 0  | 0  | Not-determined | Genome-fragment | NA | 0     |
| S2-final-viral-combined_k141_10000   | [full]      | 2212  | No  | NA    | 0  | 1  | Not-determined | Genome-fragment | NA | 0     |
| S2-final-viral-combined_k141_10005   | [full]      | 1673  | No  | NA    | 0  | 0  | Not-determined | Genome-fragment | NA | 0     |
| S2-final-viral-combined_k141_10020   | [full]      | 2869  | No  | NA    | 0  | 0  | Not-determined | Genome-fragment | NA | 0     |
| S2-final-viral-combined_k141_1004    | [full]      | 4149  | No  | NA    | 0  | 1  | Not-determined | Genome-fragment | NA | 0     |
| S2-final-viral-combined_k141_10064   | [full]      | 1655  | No  | NA    | 0  | 0  | Not-determined | Genome-fragment | NA | 0     |
| S2_k141_128151                       |             | 4289  | No  | NA    | 1  | 0  | Low-quality    | Genome-fragment | NA | 4.11  |
| S5-final-viral-combined_k141_118657  | [full]      | 4290  | No  | NA    | 1  | 3  | Low-quality    | Genome-fragment | NA | 2.73  |
| S2-final-viral-combined_k141_10324   | [full]      | 5709  | No  | NA    | 0  | 1  | Not-determined | Genome-fragment | NA | 0     |
| S9-final-viral-combined_k141_48592   | [full]      | 4292  | No  | NA    | 0  | 2  | Low-quality    | Genome-fragment | NA | 9.35  |
| S2-final-viral-combined_k141_88248   | [0_partial] | 11320 | No  | NA    | 0  | 0  | Not-determined | Genome-fragment | NA | 7.79  |
| S12-final-viral-combined_k141_6556   | [full]      | 4292  | No  | NA    | 0  | 0  | Low-quality    | Genome-fragment | NA | 60.54 |
| S2-final-viral-combined_k141_5206    | [0_partial] | 2711  | No  | NA    | 1  | 0  | Medium-quality | Genome-fragment | NA | 0     |
| S2-final-viral-combined_k141_368     | [0_partial] | 15247 | No  | NA    | 0  | 6  | Not-determined | Genome-fragment | NA | 0     |
| S2-final-viral-combined_k141_19659   | [0_partial] | 11954 | No  | NA    | 0  | 2  | Not-determined | Genome-fragment | NA | 0     |
| S17-final-viral-combined_k141_39774  | [full]      | 4293  | No  | NA    | 4  | 0  | Low-quality    | Genome-fragment | NA | 11.52 |
| S2-final-viral-combined_k141_104174  | [0_partial] | 18019 | No  | NA    | 0  | 8  | Not-determined | Genome-fragment | NA | 0     |
| S2-final-viral-combined_k141_218102  | [0_partial] | 13506 | No  | NA    | 0  | 3  | Not-determined | Genome-fragment | NA | 2.8   |
| S11-final-viral-combined_k141_63138  | [full]      | 4294  | No  | NA    | 0  | 2  | Low-quality    | Genome-fragment | NA | 7.42  |
| S12_k141_17404                       |             | 4294  | No  | NA    | 2  | 0  | Low-quality    | Genome-fragment | NA | 9.49  |
| S8-final-viral-combined_k141_75729   | [full]      | 4294  | No  | NA    | 0  | 2  | Not-determined | Genome-fragment | NA | 0     |
| S2-final-viral-combined_k141_12320   | [0_partial] | 11930 | No  | NA    | 0  | 0  | Low-quality    | Genome-fragment | NA | 2.5   |
| S7-final-viral-combined_k141_70231   | [full]      | 4295  | No  | NA    | 0  | 13 | Not-determined | Genome-fragment | NA | 0     |
| S2-final-viral-combined_k141_157082  | [0_partial] | 36662 | No  | NA    | 0  | 1  | Not-determined | Genome-fragment | NA | 4.72  |
| S2-final-viral-combined_k141_219136  | [0_partial] | 10969 | No  | NA    | 1  | 0  | Low-quality    | Genome-fragment | NA | 0     |
| S8-final-viral-combined_k141_219596  | [full]      | 4295  | No  | NA    | 1  | 0  | Low-quality    | Genome-fragment | NA | 0     |
| S2-final-viral-combined_k141_198409  | [0_partial] | 14995 | No  | NA    | 0  | 10 | Not-determined | Genome-fragment | NA | 0     |
| S2-final-viral-combined_k141_9558    | [0_partial] | 11644 | No  | NA    | 0  | 0  | Not-determined | Genome-fragment | NA | 0     |
| S2-final-viral-combined_k141_23092   | [0_partial] | 12544 | No  | NA    | 0  | 10 | Not-determined | Genome-fragment | NA | 0     |
| S2-final-viral-combined_k141_33092   | [0_partial] | 10150 | No  | NA    | 0  | 1  | Not-determined | Genome-fragment | NA | 0     |
| S2-final-viral-combined_k141_74730   | [0_partial] | 13460 | No  | NA    | 0  | 5  | Not-determined | Genome-fragment | NA | 6.89  |
| S11-final-viral-combined_k141_136137 | [full]      | 4298  | No  | NA    | 0  | 2  | Low-quality    | Genome-fragment | NA | 0     |
| S2-final-viral-combined_k141_116405  | [full]      | 10769 | No  | NA    | 0  | 8  | Not-determined | Genome-fragment | NA | 0     |
| S2-final-viral-combined_k141_75144   | [0_partial] | 9286  | No  | NA    | 1  | 3  | Medium-quality | Genome-fragment | NA | 76.77 |
| S17_k141_17299                       |             | 4302  | No  | NA    | 0  | 4  | Not-determined | Genome-fragment | NA | 2.11  |
| S2-final-viral-combined_k141_138182  | [0_partial] | 11841 | No  | NA    | 0  | 9  | Not-determined | Genome-fragment | NA | 0     |
| S2-final-viral-combined_k141_55179   | [0_partial] | 11031 | No  | NA    | 0  | 0  | Not-determined | Genome-fragment | NA | 0     |
| S2-final-viral-combined_k141_210534  | [0_partial] | 18489 | No  | NA    | 0  | 14 | Not-determined | Genome-fragment | NA | 0     |
| S2-final-viral-combined_k141_86805   | [0_partial] | 15090 | No  | NA    | 0  | 9  | Not-determined | Genome-fragment | NA | 0     |
| S2-final-viral-combined_k141_210794  | [0_partial] | 11790 | No  | NA    | 0  | 6  | Not-determined | Genome-fragment | NA | 0     |
| S2-final-viral-combined_k141_170048  | [0_partial] | 16779 | No  | NA    | 0  | 7  | Not-determined | Genome-fragment | NA | 0     |
| S2-final-viral-combined_k141_159290  | [0_partial] | 48650 | No  | NA    | 0  | 1  | Medium-quality | Genome-fragment | NA | 53.25 |
| S2-final-viral-combined_k141_181095  | [0_partial] | 3530  | Yes | 2213  | 2  | 1  | Low-quality    | Genome-fragment | NA | 4.37  |
| S6-final-viral-combined_k141_130826  | [full]      | 4302  | Yes | NA    | 2  | 2  | Not-determined | Genome-fragment | NA | 37.62 |
| S2-final-viral-combined_k141_221215  | [0_partial] | 2196  | No  | NA    | 0  | 7  | Not-determined | Genome-fragment | NA | 0     |
| S2-final-viral-combined_k141_181670  | [0_partial] | 13742 | No  | NA    | 0  | 0  | Low-quality    | Genome-fragment | NA | 10.72 |
| S2-final-viral-combined_k141_12128   | [full]      | 4304  | No  | NA    | 1  | 2  | High-quality   | High-quality    | NA | 94.48 |
| S2-final-viral-combined_k141_4685    | [0_partial] | 14637 | No  | NA    | 1  | 1  | Low-quality    | Genome-fragment | NA | 9.15  |
| S11-final-viral-combined_k141_15036  | [full]      | 4306  | No  | NA    | 0  | 6  | Not-determined | Genome-fragment | NA | 9.76  |
| S4_k141_88718                        |             | 4306  | No  | NA    | 1  | 0  | Low-quality    | Genome-fragment | NA | 2.38  |
| S2-final-viral-combined_k141_4805    | [0_partial] | 10931 | No  | NA    | 0  | 1  | Not-determined | Genome-fragment | NA | 0     |
| S2-final-viral-combined_k141_38975   | [full]      | 4307  | No  | NA    | 1  | 0  | Low-quality    | Genome-fragment | NA | 0     |
| S8-final-viral-combined_k141_192125  | [full]      | 4307  | No  | NA    | 0  | 11 | Not-determined | Genome-fragment | NA | 4.2   |
| S2-final-viral-combined_k141_161578  | [0_partial] | 11450 | No  | NA    | 0  | 0  | Low-quality    | Genome-fragment | NA | 7.81  |
| S2-final-viral-combined_k141_121215  | [0_partial] | 15787 | No  | NA    | 0  | 2  | Low-quality    | Genome-fragment | NA | 7.04  |
| S1-final-viral-combined_k141_158714  | [full]      | 4309  | No  | NA    | 0  | 4  | Not-determined | Genome-fragment | NA | 0     |
| S7_k141_28026                        |             | 4309  | No  | NA    | 0  | 0  | Low-quality    | Genome-fragment | NA | 0     |
| S7-final-viral-combined_k141_170450  | [full]      | 4310  | No  | NA    | 0  | 2  | Low-quality    | Genome-fragment | NA | 0     |
| S2-final-viral-combined_k141_79982   | [0_partial] | 11871 | No  | NA    | 0  | 4  | Not-determined | Genome-fragment | NA | 0     |
| S2-final-viral-combined_k141_51566   | [0_partial] | 21094 | No  | NA    | 0  | 4  | Not-determined | Genome-fragment | NA | 0     |
| S8-final-viral-combined_k141_1655    | [full]      | 4311  | No  | NA    | 0  | 2  | Low-quality    | Genome-fragment | NA | 6.49  |
| S17-final-viral-combined_k141_85675  | [full]      | 4311  | No  | NA    | 0  | 2  | Low-quality    | Genome-fragment | NA | 10.24 |
| S2-final-viral-combined_k141_143737  | [0_partial] | 52742 | Yes | 38952 | 3  | 10 | Medium-quality | Genome-fragment | NA | 64.63 |
| S2-final-viral-combined_k141_204225  | [0_partial] | 4195  | No  | NA    | 1  | 0  | High-quality   | High-quality    | NA | 100   |
| S4_k141_147766                       |             | 4311  | No  | NA    | 0  | 1  | Low-quality    | Genome-fragment | NA | 5.49  |
| S17_k141_64837                       |             | 4312  | No  | NA    | 2  | 0  | Low-quality    | Genome-fragment | NA | 9.53  |
| S2-final-viral-combined_k141_61938   | [0_partial] | 17405 | No  | NA    | 0  | 11 | Not-determined | Genome-fragment | NA | 0     |
| S12-final-viral-combined_k141_39498  | [full]      | 4312  | No  | NA    | 0  | 1  | Low-quality    | Genome-fragment | NA | 8.7   |
| S2-final-viral-combined_k141_7756    | [0_partial] | 63410 | Yes | 48340 | 8  | 9  | Medium-quality | Genome-fragment | NA | 84.03 |
| S7-final-viral-combined_k141_32777   | [full]      | 4313  | No  | NA    | 0  |    |                |                 |    |       |



|                                              |      |     |      |   |   |                |                 |    |       |       |
|----------------------------------------------|------|-----|------|---|---|----------------|-----------------|----|-------|-------|
| S2-final-viral-combined_k141_2658   H2gene   | 1089 | No  | NA   | 0 | 0 | Not-determined | Genome-fragment | NA |       | 0     |
| S7_k141_209514                               | 4333 | No  | NA   | 0 | 0 | Low-quality    | Genome-fragment | NA | 4.73  | 0     |
| S1_k141_107426                               | 4334 | No  | NA   | 1 | 0 | Low-quality    | Genome-fragment | NA | 2.94  | 0     |
| S17-k141_174475                              | 4334 | No  | NA   | 0 | 0 | Low-quality    | Genome-fragment | NA | 10.83 | 0     |
| S2-final-viral-combined_k141_34100   H2gene  | 3134 | No  | NA   | 0 | 0 | Not-determined | Genome-fragment | NA |       | 0     |
| S12-final-viral-combined_k141_102670   full  | 4334 | No  | NA   | 2 | 0 | Low-quality    | Genome-fragment | NA | 3.15  | 0     |
| S2-final-viral-combined_k141_158442   H2gene | 1502 | No  | NA   | 0 | 0 | Not-determined | Genome-fragment | NA |       | 0     |
| S2-final-viral-combined_k141_13367   H2gene  | 1033 | No  | NA   | 0 | 1 | Not-determined | Genome-fragment | NA |       | 0     |
| S2-final-viral-combined_k141_352980   H2gene | 1243 | No  | NA   | 0 | 1 | Not-determined | Genome-fragment | NA |       | 0     |
| S1-final-viral-combined_k141_232050   full   | 4335 | No  | NA   | 2 | 0 | Low-quality    | Genome-fragment | NA | 8.96  | 0     |
| S1-final-viral-combined_k141_179995   full   | 4335 | No  | NA   | 3 | 0 | Low-quality    | Genome-fragment | NA | 5.75  | 0     |
| S4-final-viral-combined_k141_16009   full    | 4336 | No  | NA   | 0 | 2 | Low-quality    | Genome-fragment | NA | 4.3   | 0     |
| S11-final-viral-combined_k141_122230   full  | 4337 | No  | NA   | 0 | 1 | Low-quality    | Genome-fragment | NA | 6.97  | 0     |
| S2-final-viral-combined_k141_246024   full   | 4337 | No  | NA   | 0 | 0 | Low-quality    | Genome-fragment | NA | 9.14  | 0     |
| S8-final-viral-combined_k141_7678   full     | 4337 | No  | NA   | 1 | 0 | Low-quality    | Genome-fragment | NA | 9.95  | 0     |
| S12-final-viral-combined_k141_85785   full   | 4340 | No  | NA   | 0 | 0 | Low-quality    | Genome-fragment | NA | 4.87  | 0     |
| S12-final-viral-combined_k141_295978   full  | 4340 | No  | NA   | 0 | 1 | Low-quality    | Genome-fragment | NA | 8.31  | 0     |
| S4-final-viral-combined_k141_136634   H2gene | 4340 | No  | NA   | 2 | 0 | Low-quality    | Genome-fragment | NA | 7.18  | 0     |
| S17-k141_138870                              | 4341 | No  | NA   | 0 | 5 | Low-quality    | Genome-fragment | NA | 1.6   | 0     |
| S11_k141_274426                              | 4342 | No  | NA   | 4 | 0 | Low-quality    | Genome-fragment | NA | 5.77  | 0     |
| S12_k141_67524                               | 4343 | No  | NA   | 3 | 0 | Low-quality    | Genome-fragment | NA | 9.17  | 0     |
| S11-final-viral-combined_k141_215695   full  | 4344 | No  | NA   | 0 | 5 | Low-quality    | Genome-fragment | NA | 2.54  | 0     |
| S2-final-viral-combined_k141_138921   H2gene | 1024 | No  | NA   | 0 | 1 | Not-determined | Genome-fragment | NA |       | 0     |
| S11_k141_139173                              | 4344 | No  | NA   | 0 | 0 | Low-quality    | Genome-fragment | NA | 5.21  | 0     |
| S9_k141_1381                                 | 4345 | No  | NA   | 0 | 1 | Low-quality    | Genome-fragment | NA | 3.36  | 0     |
| S7-final-viral-combined_k141_201362   full   | 4345 | No  | NA   | 0 | 1 | Low-quality    | Genome-fragment | NA | 3.09  | 0     |
| S5-final-viral-combined_k141_197577   full   | 4346 | No  | NA   | 0 | 0 | Low-quality    | Genome-fragment | NA | 8.85  | 0     |
| S2-final-viral-combined_k141_118103   H2gene | 1256 | No  | NA   | 0 | 1 | Not-determined | Genome-fragment | NA |       | 0     |
| S2-final-viral-combined_k141_220869   H2gene | 3006 | No  | NA   | 0 | 0 | Not-determined | Genome-fragment | NA |       | 0     |
| S2-final-viral-combined_k141_56354   H2gene  | 1552 | No  | NA   | 0 | 0 | Not-determined | Genome-fragment | NA |       | 0     |
| S1_k141_361639                               | 4347 | No  | NA   | 1 | 0 | Low-quality    | Genome-fragment | NA | 36.01 | 0     |
| S2-final-viral-combined_k141_128095   H2gene | 2654 | No  | NA   | 0 | 0 | Not-determined | Genome-fragment | NA |       | 0     |
| S11_k141_224472                              | 4348 | No  | NA   | 0 | 0 | Low-quality    | Genome-fragment | NA | 9.94  | 0     |
| S5-final-viral-combined_k141_78667   full    | 4349 | No  | NA   | 0 | 0 | Low-quality    | Genome-fragment | NA | 6.99  | 0     |
| S17-k141_251554                              | 4349 | No  | NA   | 0 | 5 | Low-quality    | Genome-fragment | NA | 1.6   | 0     |
| S5_k141_206388                               | 4350 | No  | NA   | 0 | 1 | Low-quality    | Genome-fragment | NA | 4.27  | 0     |
| S6-final-viral-combined_k141_9005   full     | 4350 | No  | NA   | 1 | 4 | Low-quality    | Genome-fragment | NA | 10.28 | 0     |
| S1-final-viral-combined_k141_116087   full   | 4351 | No  | NA   | 3 | 0 | Low-quality    | Genome-fragment | NA | 12.08 | 0     |
| S17-k141_25407                               | 4351 | Yes | 1899 | 1 | 1 | Low-quality    | Genome-fragment | NA | 3.52  | 56.35 |
| S8-final-viral-combined_k141_14211   full    | 4351 | No  | NA   | 0 | 2 | Low-quality    | Genome-fragment | NA | 5.69  | 0     |
| S2-final-viral-combined_k141_16545   H2gene  | 1019 | No  | NA   | 0 | 0 | Not-determined | Genome-fragment | NA |       | 0     |
| S12-final-viral-combined_k141_281152   full  | 4353 | No  | NA   | 0 | 2 | Low-quality    | Genome-fragment | NA | 4.99  | 0     |
| S8_k141_258722                               | 4354 | No  | NA   | 3 | 0 | Low-quality    | Genome-fragment | NA | 10.42 | 0     |
| S8_k141_203772                               | 4355 | No  | NA   | 0 | 1 | Low-quality    | Genome-fragment | NA | 7.22  | 0     |
| S9_k141_111753                               | 4356 | No  | NA   | 0 | 2 | Low-quality    | Genome-fragment | NA | 8.84  | 0     |
| S17-final-viral-combined_k141_44875   full   | 4356 | No  | NA   | 3 | 0 | Low-quality    | Genome-fragment | NA | 11.86 | 0     |
| S8_k141_161967                               | 4358 | No  | NA   | 0 | 1 | Low-quality    | Genome-fragment | NA | 4.72  | 0     |
| S3-final-viral-combined_k141_123041   full   | 4359 | No  | NA   | 0 | 0 | Low-quality    | Genome-fragment | NA | 11.49 | 0     |
| S12-final-viral-combined_k141_219786   full  | 4359 | No  | NA   | 0 | 0 | Low-quality    | Genome-fragment | NA | 5.31  | 0     |
| S2-final-viral-combined_k141_99193   H2gene  | 1078 | No  | NA   | 2 | 0 | Not-determined | Genome-fragment | NA |       | 0     |
| S12-final-viral-combined_k141_255913   full  | 4359 | No  | NA   | 0 | 3 | Low-quality    | Genome-fragment | NA | 6.22  | 0     |
| S8-final-viral-combined_k141_5979   full     | 4360 | No  | NA   | 0 | 0 | Low-quality    | Genome-fragment | NA | 2.28  | 0     |
| S11-final-viral-combined_k141_193402   full  | 4363 | No  | NA   | 3 | 0 | Low-quality    | Genome-fragment | NA | 9.09  | 0     |
| S2-final-viral-combined_k141_49029   H2gene  | 1378 | No  | NA   | 0 | 1 | Not-determined | Genome-fragment | NA |       | 0     |
| S2-final-viral-combined_k141_172297   full   | 1003 | No  | NA   | 0 | 0 | Not-determined | Genome-fragment | NA |       | 0     |
| S5_k141_30244                                | 4363 | No  | NA   | 4 | 0 | Low-quality    | Genome-fragment | NA | 12.54 | 0     |
| S12-final-viral-combined_k141_287089   full  | 4364 | No  | NA   | 0 | 1 | Low-quality    | Genome-fragment | NA | 3.96  | 0     |
| S12-final-viral-combined_k141_192844   full  | 4364 | No  | NA   | 2 | 0 | Low-quality    | Genome-fragment | NA | 10.46 | 0     |
| S12_k141_221670                              | 4364 | No  | NA   | 0 | 1 | Low-quality    | Genome-fragment | NA | 7.83  | 0     |
| S2-final-viral-combined_k141_16348   H2gene  | 1005 | No  | NA   | 0 | 0 | Not-determined | Genome-fragment | NA |       | 0     |
| S2-final-viral-combined_k141_160804   H2gene | 1321 | No  | NA   | 0 | 0 | Not-determined | Genome-fragment | NA |       | 0     |
| S2-final-viral-combined_k141_37547   H2gene  | 2001 | No  | NA   | 0 | 1 | Not-determined | Genome-fragment | NA |       | 0     |
| S8_k141_65903                                | 4364 | No  | NA   | 2 | 0 | Low-quality    | Genome-fragment | NA | 9.66  | 0     |
| S11_k141_181705                              | 4365 | No  | NA   | 1 | 0 | Low-quality    | Genome-fragment | NA | 8.18  | 0     |
| S11-final-viral-combined_k141_134527   full  | 4366 | No  | NA   | 0 | 1 | Low-quality    | Genome-fragment | NA | 2.86  | 0     |
| S2-final-viral-combined_k141_78925   H2gene  | 3302 | No  | NA   | 0 | 0 | Not-determined | Genome-fragment | NA |       | 0     |
| S6-final-viral-combined_k141_41169   full    | 4366 | No  | NA   | 0 | 3 | Low-quality    | Genome-fragment | NA | 2.45  | 0     |
| S6-final-viral-combined_k141_23402   full    | 4367 | No  | NA   | 2 | 0 | Low-quality    | Genome-fragment | NA | 8.84  | 0     |
| S11-final-viral-combined_k141_166697   full  | 4368 | No  | NA   | 0 | 0 | Low-quality    | Genome-fragment | NA | 7.78  | 0     |
| S2-final-viral-combined_k141_141572   H2gene | 2423 | No  | NA   | 0 | 2 | Not-determined | Genome-fragment | NA |       | 0     |
| S7-final-viral-combined_k141_191937   H2gene | 4368 | No  | NA   | 1 | 0 | Low-quality    | Genome-fragment | NA | 11.05 | 0     |
| S2-final-viral-combined_k141_141649   H2gene | 1867 | No  | NA   | 0 | 1 | Not-determined | Genome-fragment | NA |       | 0     |
| S2-final-viral-combined_k141_109911   full   | 1447 | No  | NA   | 0 | 0 | Not-determined | Genome-fragment | NA |       | 0     |
| S7-final-viral-combined_k141_139371   full   | 4369 | No  | NA   | 3 | 0 | Low-quality    | Genome-fragment | NA | 7.99  | 0     |
| S12-final-viral-combined_k141_376861   full  | 4371 | No  | NA   | 0 | 1 | Low-quality    | Genome-fragment | NA | 8.79  | 0     |
| S12_k141_361461                              | 4372 | No  | NA   | 0 | 1 | Low-quality    | Genome-fragment | NA | 9.41  | 0     |
| S2-final-viral-combined_k141_147531   full   | 4372 | No  | NA   | 1 | 0 | Low-quality    | Genome-fragment | NA | 2.37  | 0     |
| S4_k141_2599                                 | 4372 | No  | NA   | 1 | 0 | Low-quality    | Genome-fragment | NA | 1.43  | 0     |
| S1-final-viral-combined_k141_26778   full    | 4373 | No  | NA   | 0 | 1 | Low-quality    | Genome-fragment | NA | 6.04  | 0     |
| S12-final-viral-combined_k141_355794   full  | 4373 | No  | NA   | 0 | 1 | Low-quality    | Genome-fragment | NA | 3.04  | 0     |
| S4-final-viral-combined_k141_46015   H2gene  | 4373 | No  | NA   | 1 | 0 | Low-quality    | Genome-fragment | NA | 6.99  | 0     |
| S2-final-viral-combined_k141_110761   H2gene | 1105 | No  | NA   | 0 | 1 | Not-determined | Genome-fragment | NA |       | 0     |
| S11-final-viral-combined_k141_140288   full  | 4374 | No  | NA   | 5 | 0 | Low-quality    | Genome-fragment | NA | 12.2  | 0     |
| S5-final-viral-combined_k141_137330   full   | 4374 | No  | NA   | 1 | 0 | Low-quality    | Genome-fragment | NA | 7.29  | 0     |
| S4_k141_37132                                | 4376 | No  | NA   | 0 | 2 | Low-quality    | Genome-fragment | NA | 9.57  | 0     |
| S2-final-viral-combined_k141_2533   full     | 4378 | No  | NA   | 0 | 3 | Low-quality    | Genome-fragment | NA | 5.91  | 0     |
| S1-final-viral-combined_k141_232725   full   | 4382 | No  | NA   | 0 | 4 | Low-quality    | Genome-fragment | NA | 8.33  | 0     |
| S1_k141_107069                               | 4382 | No  | NA   | 0 | 3 | Low-quality    | Genome-fragment | NA | 2.02  | 0     |
| S3_k141_97147                                | 4382 | No  | NA   | 0 | 0 | Low-quality    | Genome-fragment | NA | 2.85  | 0     |
| S7_k141_60976                                | 4382 | No  | NA   | 0 | 1 | Low-quality    | Genome-fragment | NA | 1.17  | 0     |
| S2-final-viral-combined_k141_60677   H2gene  | 1115 | No  | NA   | 0 | 0 | Not-determined | Genome-fragment | NA |       | 0     |
| S12-final-viral-combined_k141_659071   full  | 4382 | Yes | 1334 | 1 | 1 | Low-quality    | Genome-fragment | NA | 61.56 | 66.56 |
| S11-final-viral-combined_k141_181947   full  | 4383 | No  | NA   | 3 | 0 | Low-quality    | Genome-fragment | NA | 9.26  | 0     |
| S1_k141_91492                                | 4383 | No  | NA   | 2 | 0 | Low-quality    | Genome-fragment | NA | 30.53 | 0     |
| S2-final-viral-combined_k141_70930   H2gene  | 2745 | No  | NA   | 0 | 1 | Not-determined | Genome-fragment | NA |       | 0     |
| S9_k141_107136                               | 4384 | No  | NA   | 3 | 0 | Low-quality    | Genome-fragment | NA | 11.33 | 0     |
| S2-final-viral-combined_k141_203874   H2gene | 1235 | No  | NA   | 0 | 1 | Not-determined | Genome-fragment | NA |       | 0     |
| S7_k141_57293                                | 4384 | No  | NA   | 1 | 0 | Low-quality    | Genome-fragment | NA | 3.98  | 0     |
| S2-final-viral-combined_k141_195333   H2gene | 1769 | No  | NA   | 0 | 1 | Not-determined | Genome-fragment | NA |       | 0     |
| S2-final-viral-combined_k141_111553   H2gene | 2779 | No  | NA   | 0 | 0 | Not-determined | Genome-fragment | NA |       | 0     |
| S2-final-viral-combined_k141_102861   H2gene | 1328 | No  | NA   | 0 | 0 | Not-determined | Genome-fragment | NA |       | 0     |
| S6-final-viral-combined_k141_93580   full    | 4384 | No  | NA   | 0 | 0 | Low-quality    | Genome-fragment | NA | 6.7   | 0     |
| S4-final-viral-combined_k141_124936   full   | 4385 | No  | NA   | 0 | 2 | Low-quality    | Genome-fragment | NA | 4.74  | 0     |
| S2-final-viral-combined_k141_143793   H2gene | 2070 | No  | NA   | 0 | 0 | Not-determined | Genome-fragment | NA |       | 0     |
| S9-final-viral-combined_k141_8676   full     | 4387 | No  | NA   | 1 | 1 | Low-quality    | Genome-fragment | NA | 7.78  | 0     |
| S2-final-viral-combined_k141_81537   H2gene  | 2873 | No  | NA   | 0 | 0 | Not-determined | Genome-fragment | NA |       | 0     |
| S8-final-viral-combined_k141_70890   full    | 4387 | No  | NA   | 1 | 0 | Low-quality    | Genome-fragment | NA | 4.33  | 0     |
| S4-final-viral-combined_k141_103661   full   | 4389 | No  | NA   | 0 | 2 | Low-quality    | Genome-fragment | NA | 1.57  | 0     |
| S7-final-viral-combined_k141_171135   full   | 4390 | No  | NA   | 0 | 0 | Low-quality    | Genome-fragment | NA | 10.18 | 0     |
| S8-final-viral-combined_k141_183291   full   | 4390 | No  | NA   | 4 | 0 | Low-quality    | Genome-fragment | NA | 9.81  | 0     |
| S2-final-viral-combined_k141_144248   H2gene | 1655 | No  | NA   | 0 | 1 | Not-determined | Genome-fragment | NA |       | 0     |
| S8_k141_207236                               | 4390 | No  | NA   | 0 | 1 | Low-quality    | Genome-fragment | NA | 1.19  | 0     |
| S5-final-viral-combined_k141_140567   full   | 4391 | No  | NA   | 2 | 0 | Low-quality    | Genome-fragment | NA | 6.65  | 0     |
| S12_k141_208922                              | 4391 | No  | NA   | 3 | 0 | Low-quality    | Genome-fragment | NA | 9.59  | 0     |
| S17-k141_193058                              | 4392 | No  | NA   | 0 | 1 | Low-quality    | Genome-fragment | NA | 2.75  | 0     |
| S17-final-viral-combined_k141_209490   full  | 4393 | No  | NA   | 0 | 3 | Low-quality    | Genome-fragment | NA | 2.09  | 0     |
| S12-final-viral-combined_k141_78866   full   | 4393 | No  | NA   | 3 | 0 | Low-quality    | Genome-fragment | NA | 5.51  | 0     |
| S7-final-viral-combined_k141_240636   full   | 4394 | No  | NA   | 2 | 0 | Low-quality    | Genome-fragment | NA | 11.54 | 0     |
| S11-final-viral-combined_k141_127220   full  | 4395 | No  | NA   | 6 | 0 | Low-quality    | Genome-fragment | NA | 7.25  | 0     |
| S8-final-viral-combined_k141_153016   full   | 4395 | No  | NA   | 1 | 0 | Low-quality    | Genome-fragment | NA | 3.29  | 0     |
| S1_k141_200906                               | 4396 | No  | NA   | 0 | 1 | Low-quality    | Genome-fragment | NA | 1.54  | 0     |
| S8-final-viral-combined_k141_38539   full    | 4396 | Yes | 393  | 1 | 0 | Low-quality    | Genome-fragment | NA | 0.61  | 91.06 |
| S11_k141_38329                               | 4397 | No  | NA   | 1 | 0 | Low-quality    | Genome-fragment | NA | 9.64  | 0     |
| S3-final-viral-combined_k141_113116   full   | 4397 | No  | NA   | 0 | 0 | Low-quality    | Genome-fragment | NA | 3.99  | 0     |
| S12_k141_202521                              | 4397 | No  | NA   | 0 | 1 | Low-quality    | Genome-fragment | NA | 4.59  | 0     |
| S12-final-viral-combined_k141_267908   full  | 4398 | No  | NA   | 1 | 0 | Low-quality    | Genome-fragment | NA | 13.82 | 0     |
| S2-final-viral-combined_k141_217396   H2gene | 1040 | No  | NA   | 0 | 0 | Not-determined | Genome-fragment | NA |       | 0     |
| S11-final-viral-combined_k141_16             |      |     |      |   |   |                |                 |    |       |       |



|                                       |        |       |     |    |       |    |                |                 |                 |       |
|---------------------------------------|--------|-------|-----|----|-------|----|----------------|-----------------|-----------------|-------|
| S2-final-viral-combined_k141_8981     | [full] | 4411  | No  | NA | 0     | 2  | Low-quality    | Genome-fragment | 9.35            | 0     |
| S2_k141_155516                        |        | 1028  | No  | NA | 0     | 2  | Not-determined | Genome-fragment | NA              | 0     |
| S2_k141_206                           |        | 1498  | No  | NA | 0     | 2  | Not-determined | Genome-fragment | NA              | 0     |
| S2_k141_217735                        |        | 2893  | No  | NA | 0     | 2  | Not-determined | Genome-fragment | NA              | 0     |
| S2_k141_124416                        |        | 58908 | Yes | NA | 46285 | 23 | 4              | Medium-quality  | Genome-fragment | 72.49 |
| S2_k141_155547                        |        | 1117  | No  | NA | 0     | 1  | Not-determined | Genome-fragment | NA              | 21.43 |
| S2_k141_31278                         |        | 2666  | No  | NA | 0     | 2  | Not-determined | Genome-fragment | NA              | 0     |
| S2_k141_52021                         |        | 2283  | No  | NA | 0     | 0  | Not-determined | Genome-fragment | NA              | 0     |
| S5-final-viral-combined_k141_248341   | [full] | 4412  | Yes | NA | 2583  | 1  | 2              | Low-quality     | Genome-fragment | 5.95  |
| S5-final-viral-combined_k141_163101   | [full] | 4413  | No  | NA | 7     | 0  | Low-quality    | Genome-fragment | 9.33            | 41.46 |
| S2_k141_228112                        |        | 1237  | No  | NA | 0     | 0  | Not-determined | Genome-fragment | NA              | 0     |
| S2_k141_33443                         |        | 1273  | No  | NA | 1     | 0  | Not-determined | Genome-fragment | NA              | 0     |
| S5-final-viral-combined_k141_1549131  | [full] | 4414  | No  | NA | 2     | 0  | Low-quality    | Genome-fragment | 2.01            | 0     |
| S2_k141_93454                         |        | 1084  | No  | NA | 0     | 1  | Not-determined | Genome-fragment | NA              | 0     |
| S2_k141_289                           |        | 2304  | No  | NA | 0     | 1  | Not-determined | Genome-fragment | NA              | 0     |
| S7-final-viral-combined_k141_1050601  | [full] | 4414  | No  | NA | 0     | 1  | Low-quality    | Genome-fragment | 7.12            | 0     |
| S2_k141_134927                        |        | 1225  | No  | NA | 0     | 0  | Not-determined | Genome-fragment | NA              | 0     |
| S1-final-viral-combined_k141_952021   | [full] | 4416  | Yes | NA | 4201  | 1  | 1              | Low-quality     | Genome-fragment | 11.12 |
| S2_k141_41821                         |        | 2179  | No  | NA | 0     | 2  | Not-determined | Genome-fragment | NA              | 4.87  |
| S2_k141_228162                        |        | 1632  | No  | NA | 0     | 1  | Not-determined | Genome-fragment | NA              | 0     |
| S2_k141_186720                        |        | 3369  | No  | NA | 0     | 1  | Not-determined | Genome-fragment | NA              | 0     |
| S5-final-viral-combined_k141_1073011  | [full] | 4416  | No  | NA | 0     | 1  | Low-quality    | Genome-fragment | 4.84            | 0     |
| S2_k141_155638                        |        | 1550  | No  | NA | 0     | 1  | Not-determined | Genome-fragment | NA              | 0     |
| S2_k141_186744                        |        | 1590  | No  | NA | 0     | 1  | Not-determined | Genome-fragment | NA              | 0     |
| S9_k141_44894                         |        | 4417  | No  | NA | 0     | 0  | Low-quality    | Genome-fragment | 4.3             | 0     |
| S2_k141_103977                        |        | 1521  | No  | NA | 0     | 1  | Not-determined | Genome-fragment | NA              | 0     |
| S7-final-viral-combined_k141_1218361  | [full] | 4417  | No  | NA | 0     | 0  | Low-quality    | Genome-fragment | 10.9            | 0     |
| S2_k141_351                           |        | 3900  | No  | NA | 0     | 0  | Not-determined | Genome-fragment | NA              | 0     |
| S2_k141_72749                         |        | 1015  | No  | NA | 0     | 0  | Not-determined | Genome-fragment | NA              | 0     |
| S2_k141_228214                        |        | 1871  | No  | NA | 0     | 1  | Not-determined | Genome-fragment | NA              | 0     |
| S5-final-viral-combined_k141_511731   | [full] | 4418  | No  | NA | 0     | 4  | Low-quality    | Genome-fragment | 6.02            | 0     |
| S2_k141_238487                        |        | 1258  | No  | NA | 0     | 2  | Not-determined | Genome-fragment | NA              | 0     |
| S12-final-viral-combined_k141_3320861 | [full] | 4419  | No  | NA | 0     | 2  | Low-quality    | Genome-fragment | 1.48            | 0     |
| S1_k141_116432                        |        | 4420  | No  | NA | 1     | 0  | Low-quality    | Genome-fragment | 2.84            | 0     |
| S2_k141_207359                        |        | 2742  | No  | NA | 0     | 1  | Not-determined | Genome-fragment | NA              | 0     |
| S2_k141_217870                        |        | 1016  | No  | NA | 0     | 1  | Not-determined | Genome-fragment | NA              | 0     |
| S2_k141_124678                        |        | 1121  | No  | NA | 0     | 0  | Not-determined | Genome-fragment | NA              | 0     |
| S2_k141_124680                        |        | 1152  | No  | NA | 0     | 0  | Not-determined | Genome-fragment | NA              | 0     |
| S17-k141_98853                        |        | 4420  | No  | NA | 0     | 1  | Low-quality    | Genome-fragment | 2.35            | 0     |
| S2_k141_207388                        |        | 6500  | No  | NA | 0     | 6  | Not-determined | Genome-fragment | NA              | 0     |
| S2_k141_155730                        |        | 1761  | No  | NA | 0     | 0  | Not-determined | Genome-fragment | NA              | 0     |
| S2_k141_166004                        |        | 2019  | No  | NA | 0     | 0  | Not-determined | Genome-fragment | NA              | 0     |
| S2_k141_166005                        |        | 1233  | No  | NA | 0     | 1  | Not-determined | Genome-fragment | NA              | 0     |
| S6_k141_12485                         |        | 4420  | No  | NA | 0     | 0  | Low-quality    | Genome-fragment | 5.23            | 0     |
| S2_k141_83195                         |        | 1468  | No  | NA | 0     | 1  | Not-determined | Genome-fragment | NA              | 0     |
| S2_k141_186807                        |        | 7964  | No  | NA | 0     | 0  | Not-determined | Genome-fragment | NA              | 0     |
| S2_k141_217924                        |        | 1251  | No  | NA | 0     | 0  | Not-determined | Genome-fragment | NA              | 0     |
| S2_k141_217927                        |        | 1032  | No  | NA | 0     | 2  | Not-determined | Genome-fragment | NA              | 0     |
| S2_k141_166013                        |        | 4028  | No  | NA | 0     | 2  | Not-determined | Genome-fragment | NA              | 0     |
| S2_k141_83205                         |        | 2643  | No  | NA | 0     | 2  | Not-determined | Genome-fragment | NA              | 0     |
| S2_k141_238558                        |        | 1914  | No  | NA | 0     | 1  | Not-determined | Genome-fragment | NA              | 0     |
| S2_k141_238572                        |        | 1015  | No  | NA | 0     | 2  | Not-determined | Genome-fragment | NA              | 0     |
| S2_k141_114210                        |        | 1024  | No  | NA | 0     | 1  | Not-determined | Genome-fragment | NA              | 0     |
| S2_k141_217962                        |        | 1199  | No  | NA | 0     | 1  | Not-determined | Genome-fragment | NA              | 0     |
| S2_k141_408                           |        | 1172  | No  | NA | 0     | 0  | Not-determined | Genome-fragment | NA              | 0     |
| S2_k141_83253                         |        | 1032  | No  | NA | 0     | 0  | Not-determined | Genome-fragment | NA              | 0     |
| S11-final-viral-combined_k141_3020581 | [full] | 4421  | No  | NA | 0     | 3  | Low-quality    | Genome-fragment | 2.86            | 0     |
| S2-final-viral-combined_k141_1945581  | [full] | 4421  | No  | NA | 0     | 0  | Low-quality    | Genome-fragment | 36.65           | 0     |
| S2_k141_238617                        |        | 1396  | No  | NA | 0     | 0  | Not-determined | Genome-fragment | NA              | 0     |
| S2_k141_10661                         |        | 3738  | No  | NA | 0     | 4  | Not-determined | Genome-fragment | NA              | 0     |
| S12-final-viral-combined_k141_1787431 | [full] | 4424  | No  | NA | 1     | 0  | Low-quality    | Genome-fragment | 9.82            | 0     |
| S2_k141_245441                        |        | 4540  | No  | NA | 0     | 2  | Not-determined | Genome-fragment | NA              | 0     |
| S2_k141_42131                         |        | 1087  | No  | NA | 0     | 1  | Not-determined | Genome-fragment | NA              | 0     |
| S2_k141_10668                         |        | 1268  | No  | NA | 0     | 0  | Not-determined | Genome-fragment | NA              | 0     |
| S2_k141_10675                         |        | 1589  | No  | NA | 0     | 0  | Not-determined | Genome-fragment | NA              | 0     |
| S2_k141_176558                        |        | 1140  | No  | NA | 0     | 0  | Not-determined | Genome-fragment | NA              | 0     |
| S2_k141_238642                        |        | 1082  | No  | NA | 0     | 0  | Not-determined | Genome-fragment | NA              | 0     |
| S2_k141_238656                        |        | 1160  | No  | NA | 0     | 1  | Not-determined | Genome-fragment | NA              | 0     |
| S2_k141_238133                        |        | 1525  | No  | NA | 0     | 0  | Not-determined | Genome-fragment | NA              | 0     |
| S2_k141_155806                        |        | 2721  | No  | NA | 0     | 0  | Not-determined | Genome-fragment | NA              | 0     |
| S2_k141_238696                        |        | 1672  | No  | NA | 0     | 1  | Not-determined | Genome-fragment | NA              | 0     |
| S2_k141_10723                         |        | 1423  | No  | NA | 0     | 0  | Not-determined | Genome-fragment | NA              | 0     |
| S2_k141_479                           |        | 3183  | No  | NA | 0     | 2  | Not-determined | Genome-fragment | NA              | 0     |
| S2_k141_496                           |        | 1187  | No  | NA | 0     | 0  | Not-determined | Genome-fragment | NA              | 0     |
| S2_k141_21685                         |        | 3126  | No  | NA | 0     | 0  | Not-determined | Genome-fragment | NA              | 0     |
| S12_k141_206021                       |        | 4424  | No  | NA | 0     | 2  | Low-quality    | Genome-fragment | 7.04            | 0     |
| S2_k141_238731                        |        | 4711  | No  | NA | 0     | 0  | Not-determined | Genome-fragment | NA              | 0     |
| S2_k141_42163                         |        | 1020  | No  | NA | 0     | 1  | Not-determined | Genome-fragment | NA              | 0     |
| S2_k141_155873                        |        | 1189  | No  | NA | 0     | 1  | Not-determined | Genome-fragment | NA              | 0     |
| S2_k141_155889                        |        | 1457  | No  | NA | 0     | 1  | Not-determined | Genome-fragment | NA              | 0     |
| S2_k141_187001                        |        | 1152  | No  | NA | 0     | 1  | Not-determined | Genome-fragment | NA              | 0     |
| S2_k141_187005                        |        | 1500  | No  | NA | 0     | 0  | Not-determined | Genome-fragment | NA              | 0     |
| S2_k141_73008                         |        | 3724  | No  | NA | 0     | 0  | Not-determined | Genome-fragment | NA              | 0     |
| S2_k141_187009                        |        | 1359  | No  | NA | 0     | 1  | Not-determined | Genome-fragment | NA              | 0     |
| S2_k141_155914                        |        | 1359  | No  | NA | 0     | 1  | Not-determined | Genome-fragment | NA              | 0     |
| S2_k141_155931                        |        | 1174  | No  | NA | 0     | 0  | Not-determined | Genome-fragment | NA              | 0     |
| S8-final-viral-combined_k141_2522521  | [full] | 4424  | No  | NA | 1     | 0  | Low-quality    | Genome-fragment | 4.37            | 0     |
| S2_k141_73036                         |        | 3712  | No  | NA | 0     | 1  | Not-determined | Genome-fragment | NA              | 0     |
| S2_k141_145055                        |        | 1820  | No  | NA | 0     | 1  | Not-determined | Genome-fragment | NA              | 0     |
| S2_k141_42271                         |        | 3588  | No  | NA | 0     | 1  | Not-determined | Genome-fragment | NA              | 0     |
| S2_k141_207622                        |        | 1026  | No  | NA | 0     | 1  | Not-determined | Genome-fragment | NA              | 0     |
| S2_k141_93352                         |        | 1841  | No  | NA | 0     | 0  | Not-determined | Genome-fragment | NA              | 0     |
| S2_k141_21204                         |        | 4502  | No  | NA | 0     | 5  | Not-determined | Genome-fragment | NA              | 0     |
| S2_k141_238867                        |        | 1214  | No  | NA | 0     | 0  | Not-determined | Genome-fragment | NA              | 0     |
| S2_k141_21680                         |        | 3388  | No  | NA | 0     | 0  | Not-determined | Genome-fragment | NA              | 0     |
| S17-k141_163872                       |        | 4425  | No  | NA | 0     | 2  | Low-quality    | Genome-fragment | 2.28            | 0     |
| S2_k141_155993                        |        | 1286  | No  | NA | 0     | 0  | Not-determined | Genome-fragment | NA              | 0     |
| S2_k141_176674                        |        | 3685  | No  | NA | 0     | 5  | Not-determined | Genome-fragment | NA              | 0     |
| S2_k141_175924                        |        | 4425  | No  | NA | 0     | 0  | Low-quality    | Genome-fragment | 3.98            | 0     |
| S2_k141_601                           |        | 7322  | No  | NA | 0     | 5  | Not-determined | Genome-fragment | NA              | 0     |
| S2_k141_228426                        |        | 3388  | No  | NA | 0     | 0  | Not-determined | Genome-fragment | NA              | 0     |
| S2_k141_135224                        |        | 4816  | No  | NA | 0     | 0  | Not-determined | Genome-fragment | NA              | 0     |
| S2_k141_207659                        |        | 3298  | No  | NA | 0     | 0  | Not-determined | Genome-fragment | NA              | 0     |
| S2_k141_52340                         |        | 2431  | No  | NA | 0     | 2  | Not-determined | Genome-fragment | NA              | 0     |
| S2_k141_21329                         |        | 1097  | No  | NA | 0     | 1  | Not-determined | Genome-fragment | NA              | 0     |
| S2_k141_176723                        |        | 1087  | No  | NA | 0     | 1  | Not-determined | Genome-fragment | NA              | 0     |
| S2_k141_21336                         |        | 4878  | No  | NA | 0     | 0  | Not-determined | Genome-fragment | NA              | 0     |
| S2_k141_228452                        |        | 1042  | No  | NA | 0     | 1  | Not-determined | Genome-fragment | NA              | 0     |
| S2_k141_176743                        |        | 1532  | No  | NA | 0     | 0  | Not-determined | Genome-fragment | NA              | 0     |
| S2_k141_156080                        |        | 2522  | No  | NA | 0     | 0  | Not-determined | Genome-fragment | NA              | 0     |
| S1-final-viral-combined_k141_746321   | [full] | 4426  | No  | NA | 0     | 4  | Low-quality    | Genome-fragment | 2.4             | 0     |
| S2_k141_10886                         |        | 1014  | No  | NA | 0     | 0  | Not-determined | Genome-fragment | NA              | 0     |
| S2_k141_93792                         |        | 1208  | No  | NA | 0     | 0  | Not-determined | Genome-fragment | NA              | 0     |
| S2_k141_21361                         |        | 1319  | No  | NA | 0     | 0  | Not-determined | Genome-fragment | NA              | 0     |
| S2_k141_42420                         |        | 1584  | No  | NA | 0     | 0  | Not-determined | Genome-fragment | NA              | 0     |
| S11-final-viral-combined_k141_3033651 | [full] | 4428  | No  | NA | 0     | 2  | Low-quality    | Genome-fragment | 5.21            | 0     |
| S2_k141_228501                        |        | 1231  | No  | NA | 0     | 0  | Not-determined | Genome-fragment | NA              | 0     |
| S7_k141_231493                        |        | 4428  | No  | NA | 0     | 4  | Low-quality    | Genome-fragment | 0.65            | 0     |
| S2_k141_93816                         |        | 2141  | No  | NA | 0     | 2  | Not-determined | Genome-fragment | NA              | 0     |
| S2_k141_42458                         |        | 2298  | No  | NA | 0     | 2  | Not-determined | Genome-fragment | NA              | 0     |
| S2_k141_105979                        |        | 1386  | No  | NA | 0     | 1  | Not-determined | Genome-fragment | NA              | 0     |
| S2_k141_176750                        |        | 1711  | No  | NA | 0     | 2  | Not-determined | Genome-fragment | NA              | 0     |
| S2_k141_42514                         |        | 1357  | No  | NA | 0     | 0  | Not-determined | Genome-fragment | NA              | 0     |
| S2_k141_104287                        |        | 2100  | No  | NA | 0     | 1  | Not-determined | Genome-fragment | NA              | 0     |
| S2_k141_425488                        |        | 2212  | No  | NA | 0     | 0  | Not-determined | Genome-fragment | NA              | 0     |
| S2_k141_52374                         |        | 1626  | No  | NA | 0     | 1  | Not-determined | Genome-fragment | NA              | 0     |
| S4_k141_139834                        |        | 4428  | Yes | NA | 1212  | 1  | 2              | Low-quality     | Genome-fragment | 0.49  |
| S2_k141_52382                         |        | 1274  | No  | NA | 0     | 1  | Not-determined | Genome-fragment | NA              | 72.63 |
| S17-final-viral-combined_k141_911381  | [full] | 4429  | No  | NA | 0     | 3  | Low-quality    | Genome-fragment | 1.47            | 0     |
| S2_k141_114398                        |        | 10830 | No  | NA | 0     | 2  | Not-determined | Genome-fragment | NA              | 0     |
| S2_k141_164408                        |        | 1210  | No  | NA | 0     | 1  | Not-determined | Genome-fragment | NA              | 0     |
| S8-final-viral-combined_k141_2252951  | [full] | 4429  | No  | NA | 3     | 0  | Low-quality    | Genome-fragment | 9.83            | 0     |
| S2_k141_52413                         |        | 1072  | No  | NA | 0     | 1  | Not-determined | Genome-fragment | NA              | 0     |
| S2_k141_21558                         |        | 1099  | No  | NA | 0     | 1  | Not-determined | Genome-fragment | NA              | 0     |
| S2_k141_114424                        |        | 3307  | No  | NA | 0     | 2  | Not-determined | Genome-fragment | NA              | 0     |
| S2_k141_826                           |        | 1250  | No  | NA | 0     | 0  | Not-determined | Genome-fragment | NA              | 0     |
| S2_k141_73239                         |        | 1371  | No  | NA | 0     | 0  | Not-determined | Genome-fragment | NA              | 0     |
| S6_k141_221171                        |        | 4429  | No  | NA | 0     | 0  | Low-quality    | Genome-fragment | 10.53           | 0     |
| S11-final-viral-combined_k141_2167571 | [full] | 4430  | No  | NA | 4     | 0  | Low-quality    | Genome-fragment | 12.06           | 0     |
| S2_k141_109546                        |        | 4431  | No  | NA | 0     | 2  |                |                 |                 |       |



|                                              |       |     |       |    |   |                |                 |    |       |
|----------------------------------------------|-------|-----|-------|----|---|----------------|-----------------|----|-------|
| S2_k141_146027                               | 1060  | No  | NA    | 0  | 1 | Not-determined | Genome-fragment | NA | 0     |
| S2_k141_166002                               | 1249  | No  | NA    | 0  | 0 | Not-determined | Genome-fragment | NA | 0     |
| S11_k141_130366                              | 4440  | No  | NA    | 1  | 0 | Low-quality    | Genome-fragment | NA | 22.69 |
| S2_k141_32021                                | 1001  | No  | NA    | 0  | 1 | Not-determined | Genome-fragment | NA | 0     |
| S2_k141_32025                                | 1180  | No  | NA    | 0  | 0 | Not-determined | Genome-fragment | NA | 0     |
| S2_k141_23640                                | 1091  | No  | NA    | 0  | 0 | Not-determined | Genome-fragment | NA | 0     |
| S1-final-viral-combined_k141_68197[full]     | 4440  | No  | NA    | 0  | 2 | Low-quality    | Genome-fragment | NA | 2.26  |
| S2_k141_104537                               | 4300  | No  | NA    | 0  | 1 | Not-determined | Genome-fragment | NA | 0     |
| S12_k141_87178                               | 4440  | No  | NA    | 0  | 1 | Low-quality    | Genome-fragment | NA | 7.41  |
| S2_k141_21769                                | 3967  | No  | NA    | 0  | 4 | Not-determined | Genome-fragment | NA | 0     |
| S2_k141_166659                               | 3936  | No  | NA    | 0  | 0 | Not-determined | Genome-fragment | NA | 0     |
| S2_k141_208044                               | 1474  | No  | NA    | 0  | 0 | Not-determined | Genome-fragment | NA | 0     |
| S2_k141_83753                                | 4541  | No  | NA    | 0  | 1 | Not-determined | Genome-fragment | NA | 0     |
| S2_k141_104547                               | 11248 | No  | NA    | 0  | 2 | Not-determined | Genome-fragment | NA | 0     |
| S11_k141_134140                              | 4442  | No  | NA    | 0  | 1 | Low-quality    | Genome-fragment | NA | 6.21  |
| S1-final-viral-combined_k141_379789[full]    | 4442  | No  | NA    | 5  | 0 | Not-determined | Genome-fragment | NA | 6.77  |
| S12_k141_290869                              | 4442  | No  | NA    | 5  | 0 | Low-quality    | Genome-fragment | NA | 7.39  |
| S1_k141_313132                               | 4443  | No  | NA    | 0  | 2 | Low-quality    | Genome-fragment | NA | 0.38  |
| S2_k141_135329                               | 3996  | No  | NA    | 0  | 2 | Not-determined | Genome-fragment | NA | 0     |
| S5_k141_8717                                 | 4443  | No  | NA    | 2  | 0 | Low-quality    | Genome-fragment | NA | 4.98  |
| S2_k141_166660                               | 3163  | No  | NA    | 0  | 7 | Not-determined | Genome-fragment | NA | 0     |
| S8-final-viral-combined_k141_161766[full]    | 4443  | No  | NA    | 1  | 1 | Low-quality    | Genome-fragment | NA | 3.89  |
| S2_k141_125387                               | 2450  | No  | NA    | 0  | 1 | Not-determined | Genome-fragment | NA | 0     |
| S2_k141_94067                                | 1338  | No  | NA    | 0  | 1 | Not-determined | Genome-fragment | NA | 0     |
| S2_k141_197442                               | 2663  | No  | NA    | 0  | 2 | Not-determined | Genome-fragment | NA | 0     |
| S1-final-viral-combined_k141_22065[full]     | 4444  | No  | NA    | 5  | 0 | Low-quality    | Genome-fragment | NA | 12.15 |
| S2_k141_146128                               | 1546  | No  | NA    | 0  | 0 | Not-determined | Genome-fragment | NA | 0     |
| S2_k141_21832                                | 7656  | No  | NA    | 0  | 2 | Not-determined | Genome-fragment | NA | 0     |
| S2_k141_197462                               | 1305  | No  | NA    | 0  | 0 | Not-determined | Genome-fragment | NA | 0     |
| S2_k141_156439                               | 31389 | Yes | 21599 | 10 | 8 | Medium-quality | Genome-fragment | NA | 66.55 |
| S2_k141_166756                               | 2117  | No  | NA    | 0  | 1 | Not-determined | Genome-fragment | NA | 0     |
| S2_k141_83959                                | 1173  | No  | NA    | 0  | 1 | Not-determined | Genome-fragment | NA | 0     |
| S1_k141_118841                               | 4444  | No  | NA    | 2  | 0 | Low-quality    | Genome-fragment | NA | 12.98 |
| S2_k141_135583                               | 3607  | No  | NA    | 0  | 2 | Not-determined | Genome-fragment | NA | 0     |
| S2_k141_1070                                 | 1854  | No  | NA    | 0  | 1 | Not-determined | Genome-fragment | NA | 0     |
| S2_k141_11522                                | 3257  | No  | NA    | 0  | 1 | Not-determined | Genome-fragment | NA | 0     |
| S2_k141_166783                               | 4429  | No  | NA    | 0  | 2 | Not-determined | Genome-fragment | NA | 0     |
| S1-final-viral-combined_k141_130456[full]    | 4445  | No  | NA    | 0  | 0 | Low-quality    | Genome-fragment | NA | 7.15  |
| S2_k141_1092                                 | 1163  | No  | NA    | 0  | 0 | Not-determined | Genome-fragment | NA | 0     |
| S2_k141_83982                                | 3943  | No  | NA    | 0  | 0 | Not-determined | Genome-fragment | NA | 0     |
| S2_k141_21889                                | 4783  | No  | NA    | 0  | 0 | Not-determined | Genome-fragment | NA | 0     |
| S2_k141_114862                               | 2840  | No  | NA    | 0  | 0 | Not-determined | Genome-fragment | NA | 0     |
| S2_k141_52749                                | 2129  | No  | NA    | 0  | 0 | Not-determined | Genome-fragment | NA | 0     |
| S2_k141_229127                               | 3015  | No  | NA    | 0  | 4 | Not-determined | Genome-fragment | NA | 0     |
| S1_k141_233110                               | 4446  | No  | NA    | 0  | 0 | Low-quality    | Genome-fragment | NA | 9.7   |
| S2_k141_166836                               | 1668  | No  | NA    | 0  | 0 | Not-determined | Genome-fragment | NA | 0     |
| S2_k141_197525                               | 1311  | No  | NA    | 0  | 1 | Not-determined | Genome-fragment | NA | 0     |
| S2_k141_104702                               | 1406  | No  | NA    | 0  | 0 | Not-determined | Genome-fragment | NA | 0     |
| S2_k141_1330                                 | 1323  | No  | NA    | 0  | 1 | Not-determined | Genome-fragment | NA | 0     |
| S12_k141_61771                               | 4447  | No  | NA    | 0  | 4 | Low-quality    | Genome-fragment | NA | 3.2   |
| S2_k141_104735                               | 1099  | No  | NA    | 0  | 0 | Not-determined | Genome-fragment | NA | 0     |
| S8-final-viral-combined_k141_109759[full]    | 4447  | No  | NA    | 0  | 0 | Low-quality    | Genome-fragment | NA | 7.73  |
| S1-final-viral-combined_k141_811[full]       | 4449  | No  | NA    | 2  | 0 | Low-quality    | Genome-fragment | NA | 15.63 |
| S5-final-viral-combined_k141_155736[full]    | 4450  | No  | NA    | 1  | 0 | Low-quality    | Genome-fragment | NA | 7.26  |
| S2_k141_208213                               | 1183  | No  | NA    | 0  | 0 | Not-determined | Genome-fragment | NA | 0     |
| S2_k141_156504                               | 1490  | No  | NA    | 0  | 1 | Not-determined | Genome-fragment | NA | 0     |
| S17-final-viral-combined_k141_217594[full]   | 4450  | No  | NA    | 0  | 2 | Low-quality    | Genome-fragment | NA | 4.18  |
| S2_k141_166900                               | 1057  | No  | NA    | 0  | 1 | Not-determined | Genome-fragment | NA | 0     |
| S8-final-viral-combined_k141_10480[full]     | 4450  | No  | NA    | 1  | 0 | Low-quality    | Genome-fragment | NA | 6.6   |
| S2_k141_43138                                | 5163  | No  | NA    | 0  | 0 | Low-quality    | Genome-fragment | NA | 0     |
| S1-final-viral-combined_k141_333342[full]    | 4451  | No  | NA    | 0  | 3 | Low-quality    | Genome-fragment | NA | 1.8   |
| S2_k141_21976                                | 1121  | No  | NA    | 0  | 0 | Not-determined | Genome-fragment | NA | 0     |
| S2_k141_239233                               | 3995  | No  | NA    | 0  | 1 | Not-determined | Genome-fragment | NA | 0     |
| S12_k141_325649                              | 4451  | No  | NA    | 0  | 2 | Low-quality    | Genome-fragment | NA | 3.05  |
| S11-final-viral-combined_k141_138359[full]   | 4452  | No  | NA    | 0  | 0 | Low-quality    | Genome-fragment | NA | 8.69  |
| S1-final-viral-combined_k141_157175[full]    | 4452  | No  | NA    | 0  | 1 | Low-quality    | Genome-fragment | NA | 3.45  |
| S2_k141_187506                               | 1532  | No  | NA    | 0  | 1 | Not-determined | Genome-fragment | NA | 0     |
| S7-final-viral-combined_k141_215304[full]    | 4452  | No  | NA    | 0  | 3 | Low-quality    | Genome-fragment | NA | 0.52  |
| S2_k141_239300                               | 1892  | No  | NA    | 0  | 0 | Not-determined | Genome-fragment | NA | 0     |
| S2_k141_1228                                 | 4133  | No  | NA    | 0  | 1 | Not-determined | Genome-fragment | NA | 0     |
| S2_k141_197599                               | 1007  | No  | NA    | 0  | 1 | Not-determined | Genome-fragment | NA | 0     |
| S2_k141_52884                                | 3847  | No  | NA    | 0  | 1 | Not-determined | Genome-fragment | NA | 0     |
| S2_k141_208258                               | 1180  | No  | NA    | 0  | 0 | Not-determined | Genome-fragment | NA | 0     |
| S7-final-viral-combined_k141_94602[full]     | 4452  | No  | NA    | 0  | 0 | Low-quality    | Genome-fragment | NA | 10.33 |
| S2_k141_197619                               | 4118  | No  | NA    | 0  | 1 | Not-determined | Genome-fragment | NA | 0     |
| S5-final-viral-combined_k141_122653[112]gene | 4453  | No  | NA    | 1  | 0 | Low-quality    | Genome-fragment | NA | 3.08  |
| S2_k141_146401                               | 9684  | No  | NA    | 0  | 3 | Not-determined | Genome-fragment | NA | 0     |
| S2_k141_197632                               | 1096  | No  | NA    | 0  | 1 | Not-determined | Genome-fragment | NA | 0     |
| S12-final-viral-combined_k141_65070[full]    | 4453  | No  | NA    | 2  | 0 | Low-quality    | Genome-fragment | NA | 11.04 |
| S2_k141_114927                               | 2286  | No  | NA    | 0  | 0 | Not-determined | Genome-fragment | NA | 0     |
| S2_k141_84191                                | 1748  | No  | NA    | 0  | 1 | Not-determined | Genome-fragment | NA | 0     |
| S2_k141_164409                               | 2307  | No  | NA    | 0  | 2 | Not-determined | Genome-fragment | NA | 0     |
| S11_k141_215549                              | 4454  | No  | NA    | 1  | 0 | Low-quality    | Genome-fragment | NA | 8.77  |
| S2_k141_43331                                | 1103  | No  | NA    | 0  | 1 | Not-determined | Genome-fragment | NA | 0     |
| S2_k141_146424                               | 2405  | No  | NA    | 0  | 0 | Not-determined | Genome-fragment | NA | 0     |
| S2_k141_197656                               | 4189  | No  | NA    | 0  | 3 | Not-determined | Genome-fragment | NA | 0     |
| S2_k141_239392                               | 3696  | No  | NA    | 0  | 2 | Not-determined | Genome-fragment | NA | 0     |
| S1_k141_21599                                | 4454  | No  | NA    | 0  | 0 | Low-quality    | Genome-fragment | NA | 9.32  |
| S2_k141_167159                               | 4010  | No  | NA    | 0  | 2 | Not-determined | Genome-fragment | NA | 0     |
| S12_k141_375613                              | 4454  | No  | NA    | 0  | 0 | Low-quality    | Genome-fragment | NA | 7.83  |
| S2_k141_187585                               | 1008  | No  | NA    | 0  | 0 | Not-determined | Genome-fragment | NA | 0     |
| S2_k141_177638                               | 3816  | No  | NA    | 0  | 1 | Not-determined | Genome-fragment | NA | 0     |
| S2_k141_1307                                 | 5032  | No  | NA    | 0  | 0 | Not-determined | Genome-fragment | NA | 0     |
| S2_k141_1308                                 | 1128  | No  | NA    | 0  | 1 | Not-determined | Genome-fragment | NA | 0     |
| S2_k141_135888                               | 1064  | No  | NA    | 0  | 1 | Not-determined | Genome-fragment | NA | 0     |
| S2_k141_197725                               | 1030  | No  | NA    | 0  | 0 | Not-determined | Genome-fragment | NA | 0     |
| S2_k141_52951                                | 1339  | No  | NA    | 0  | 0 | Not-determined | Genome-fragment | NA | 0     |
| S2_k141_177718                               | 1248  | No  | NA    | 0  | 0 | Not-determined | Genome-fragment | NA | 0     |
| S2_k141_208441                               | 1393  | No  | NA    | 0  | 0 | Not-determined | Genome-fragment | NA | 0     |
| S2_k141_22170                                | 1022  | No  | NA    | 0  | 0 | Not-determined | Genome-fragment | NA | 0     |
| S2_k141_218660                               | 1240  | No  | NA    | 0  | 1 | Not-determined | Genome-fragment | NA | 0     |
| S2_k141_208467                               | 1815  | No  | NA    | 0  | 1 | Not-determined | Genome-fragment | NA | 0     |
| S2_k141_84333                                | 3150  | No  | NA    | 0  | 0 | Not-determined | Genome-fragment | NA | 0     |
| S2_k141_115005                               | 2234  | No  | NA    | 0  | 1 | Not-determined | Genome-fragment | NA | 0     |
| S2_k141_63217                                | 1492  | No  | NA    | 0  | 2 | Not-determined | Genome-fragment | NA | 0     |
| S2_k141_115042                               | 1507  | No  | NA    | 0  | 0 | Not-determined | Genome-fragment | NA | 0     |
| S2_k141_22233                                | 5132  | No  | NA    | 0  | 5 | Not-determined | Genome-fragment | NA | 0     |
| S8-final-viral-combined_k141_253770[full]    | 4454  | No  | NA    | 1  | 1 | Low-quality    | Genome-fragment | NA | 2.8   |
| S2_k141_84370                                | 1583  | No  | NA    | 0  | 0 | Not-determined | Genome-fragment | NA | 0     |
| S2_k141_229399                               | 1005  | No  | NA    | 0  | 0 | Not-determined | Genome-fragment | NA | 0     |
| S2_k141_1355                                 | 1559  | No  | NA    | 0  | 0 | Not-determined | Genome-fragment | NA | 0     |
| S12_k141_276613                              | 4456  | No  | NA    | 2  | 0 | Low-quality    | Genome-fragment | NA | 10.16 |
| S2_k141_22281                                | 1094  | No  | NA    | 0  | 2 | Not-determined | Genome-fragment | NA | 0     |
| S11-final-viral-combined_k141_30549[full]    | 4458  | No  | NA    | 0  | 1 | Low-quality    | Genome-fragment | NA | 8.68  |
| S1_k141_231238                               | 4458  | No  | NA    | 0  | 0 | Low-quality    | Genome-fragment | NA | 6.44  |
| S2_k141_115086                               | 3957  | No  | NA    | 0  | 1 | Not-determined | Genome-fragment | NA | 0     |
| S5-final-viral-combined_k141_18379[full]     | 4458  | No  | NA    | 4  | 0 | Low-quality    | Genome-fragment | NA | 10.63 |
| S2_k141_115113                               | 1006  | No  | NA    | 0  | 0 | Not-determined | Genome-fragment | NA | 0     |
| S11_k141_207067                              | 4459  | No  | NA    | 1  | 0 | Low-quality    | Genome-fragment | NA | 4.79  |
| S2_k141_167430                               | 2917  | No  | NA    | 0  | 4 | Not-determined | Genome-fragment | NA | 0     |
| S1-final-viral-combined_k141_262680[full]    | 4459  | No  | NA    | 0  | 2 | Low-quality    | Genome-fragment | NA | 10.26 |
| S1_k141_195191                               | 4459  | No  | NA    | 0  | 1 | Low-quality    | Genome-fragment | NA | 11.24 |
| S2_k141_11867                                | 1190  | No  | NA    | 0  | 1 | Not-determined | Genome-fragment | NA | 0     |
| S2_k141_84478                                | 3057  | No  | NA    | 0  | 1 | Not-determined | Genome-fragment | NA | 0     |
| S7_k141_77080                                | 4459  | No  | NA    | 0  | 0 | Low-quality    | Genome-fragment | NA | 4.57  |
| S12-final-viral-combined_k141_267688[full]   | 4459  | No  | NA    | 0  | 2 | Low-quality    | Genome-fragment | NA | 3.09  |
| S4-final-viral-combined_k141_91219[full]     | 4459  | No  | NA    | 6  | 0 | Low-quality    | Genome-fragment | NA | 12.74 |
| S2_k141_136306                               | 1049  | No  | NA    | 0  | 1 | Not-determined | Genome-fragment | NA | 0     |
| S2_k141_115207                               | 3012  | No  | NA    | 0  | 0 | Not-determined | Genome-fragment | NA | 0     |
| S2_k141_32370                                | 3458  | No  | NA    | 0  | 2 | Not-determined | Genome-fragment | NA | 0     |
| S2_k141_84536                                | 4713  | No  | NA    | 0  | 2 | Not-determined | Genome-fragment | NA | 0     |
| S2_k141_94706                                | 1031  | No  | NA    | 0  | 1 | Not-determined | Genome-fragment | NA | 0     |
| S8-final-viral-combined_k141_194176[full]    | 4459  | No  | NA    | 2  | 0 | Low-quality    | Genome-fragment | NA | 9.89  |
| S2_k141_11979                                | 4833  | No  | NA    | 0  | 0 | Not-determined | Genome-fragment | NA | 0     |
| S2_k141_47826                                | 4461  | Yes | 2756  | 1  | 1 | Low-quality    | Genome-fragment | NA | 1.27  |
| S6-final-viral-combined_k141_117275[full]    | 4461  | No  | NA    | 2  | 0 | Low-quality    | Genome-fragment | NA | 7.03  |
| S6-final-viral-combined_k141_91761[full]     | 4462  | No  | NA    | 0  | 3 | Low-quality    | Genome-fragment | NA | 6.03  |
| S2_k141_177874                               | 1380  | No  | NA    | 0  | 2 | Not-determined | Genome-fragment | NA | 0     |
| S2_k141_156767                               | 7449  | No  | NA    | 0  | 2 | Not-determined | Genome-fragment | NA | 0     |
| S2_k141_63447                                | 1032  | No  | NA    | 0  | 0 | Not-determined | Genome-fragment | NA | 0     |
| S2_k141_1488                                 | 1430  | No  | NA    | 0  | 1 | Not-determined | Genome-fragment | NA | 0     |
| S8-final-viral-combined_k141_184372[full]    | 4463  | No  | NA    | 1  | 0 | Low-quality    | Genome-fragment | NA | 3.58  |
| S2_k141_197915                               | 3356  | No  | NA    | 0  | 1 | Not-determined | Genome-fragment | NA | 0     |
| S2_k141_125776                               | 2291  | No  | NA    | 0  | 1 | Not-determined | Genome-fragment | NA | 0     |
| S11-final-viral-combined_k141_279565[full]   | 4464  | No  | NA    | 3  | 0 | Low-quality    | Genome-fragment | NA | 9.83  |
| S3-final-viral-combined_k141_9970[full]      |       |     |       |    |   |                |                 |    |       |



|                                            |       |     |      |   |   |                |                 |       |       |   |
|--------------------------------------------|-------|-----|------|---|---|----------------|-----------------|-------|-------|---|
| S2_k141_44030                              | 1230  | No  | NA   | 0 | 1 | Not-determined | Genome-fragment | NA    | 0     | 0 |
| S17-k141_216380                            | 4471  | No  | NA   | 1 | 0 | Low-quality    | Genome-fragment | 28.76 | 0     | 0 |
| S2_k141_136341                             | 6647  | No  | NA   | 0 | 5 | Not-determined | Genome-fragment | NA    | 0     | 0 |
| S2_k141_219001                             | 4388  | No  | NA   | 0 | 4 | Not-determined | Genome-fragment | NA    | 0     | 0 |
| S2_k141_53393                              | 1020  | No  | NA   | 0 | 0 | Not-determined | Genome-fragment | NA    | 0     | 0 |
| S2_k141_178121                             | 1276  | No  | NA   | 0 | 0 | Not-determined | Genome-fragment | NA    | 0     | 0 |
| S2_k141_156958                             | 1013  | No  | NA   | 0 | 1 | Not-determined | Genome-fragment | NA    | 0     | 0 |
| S2_k141_22617                              | 1196  | No  | NA   | 0 | 1 | Not-determined | Genome-fragment | NA    | 0     | 0 |
| S2_k141_63717                              | 1228  | No  | NA   | 0 | 0 | Not-determined | Genome-fragment | NA    | 0     | 0 |
| S1_k141_258471                             | 4472  | No  | NA   | 0 | 2 | Low-quality    | Genome-fragment | 2.72  | 0     | 0 |
| S2_k141_178186                             | 1111  | No  | NA   | 0 | 1 | Not-determined | Genome-fragment | NA    | 0     | 0 |
| S2_k141_239515                             | 3308  | No  | NA   | 0 | 1 | Not-determined | Genome-fragment | NA    | 0     | 0 |
| S2_k141_157021                             | 1283  | No  | NA   | 0 | 1 | Not-determined | Genome-fragment | NA    | 0     | 0 |
| S2_k141_239819                             | 1347  | No  | NA   | 0 | 1 | Not-determined | Genome-fragment | NA    | 0     | 0 |
| S2-final-viral-combined_k141_172316  full  | 4472  | No  | NA   | 0 | 2 | Low-quality    | Genome-fragment | 5.47  | 0     | 0 |
| S2_k141_178227                             | 1576  | No  | NA   | 0 | 1 | Not-determined | Genome-fragment | NA    | 0     | 0 |
| S8-final-viral-combined_k141_18598  full   | 4473  | No  | NA   | 2 | 0 | Low-quality    | Genome-fragment | 8.14  | 0     | 0 |
| S2_k141_115536                             | 1101  | No  | NA   | 0 | 0 | Not-determined | Genome-fragment | NA    | 0     | 0 |
| S1-final-viral-combined_k141_685  full     | 4474  | No  | NA   | 2 | 0 | Low-quality    | Genome-fragment | 7.22  | 0     | 0 |
| S2_k141_32646                              | 1330  | No  | NA   | 0 | 0 | Not-determined | Genome-fragment | NA    | 0     | 0 |
| S7-final-viral-combined_k141_17395  full   | 4474  | No  | NA   | 0 | 2 | Low-quality    | Genome-fragment | 8.76  | 0     | 0 |
| S8-final-viral-combined_k141_19340  full   | 4474  | No  | NA   | 2 | 0 | Low-quality    | Genome-fragment | 6.54  | 0     | 0 |
| S8-final-viral-combined_k141_275009  full  | 4475  | No  | NA   | 0 | 1 | Low-quality    | Genome-fragment | 10.32 | 0     | 0 |
| S2_k141_1870                               | 1008  | No  | NA   | 0 | 1 | Not-determined | Genome-fragment | NA    | 7.91  | 0 |
| S17-final-viral-combined_k141_118471  full | 4476  | No  | NA   | 0 | 0 | Low-quality    | Genome-fragment | 1.18  | 0     | 0 |
| S7_k141_86899                              | 4477  | No  | NA   | 0 | 1 | Low-quality    | Genome-fragment | NA    | 0     | 0 |
| S2_k141_136479                             | 1092  | No  | NA   | 0 | 1 | Not-determined | Genome-fragment | NA    | 0     | 0 |
| S2_k141_229829                             | 1110  | No  | NA   | 0 | 1 | Not-determined | Genome-fragment | NA    | 0     | 0 |
| S2_k141_1877                               | 1129  | No  | NA   | 0 | 1 | Not-determined | Genome-fragment | NA    | 0     | 0 |
| S12-final-viral-combined_k141_60625  full  | 4477  | No  | NA   | 0 | 0 | Low-quality    | Genome-fragment | 8.79  | 0     | 0 |
| S2_k141_219064                             | 2093  | No  | NA   | 0 | 2 | Not-determined | Genome-fragment | NA    | 0     | 0 |
| S2_k141_23672                              | 1376  | No  | NA   | 0 | 0 | Not-determined | Genome-fragment | NA    | 0     | 0 |
| S2_k141_198120                             | 5702  | No  | NA   | 0 | 0 | Not-determined | Genome-fragment | NA    | 0     | 0 |
| S2_k141_136527                             | 1496  | No  | NA   | 0 | 0 | Not-determined | Genome-fragment | NA    | 0     | 0 |
| S2_k141_126093                             | 1554  | No  | NA   | 0 | 0 | Not-determined | Genome-fragment | NA    | 0     | 0 |
| S2_k141_74117                              | 3056  | No  | NA   | 0 | 1 | Not-determined | Genome-fragment | NA    | 0     | 0 |
| S2_k141_198154                             | 1467  | No  | NA   | 0 | 1 | Not-determined | Genome-fragment | NA    | 0     | 0 |
| S2_k141_126107                             | 1288  | No  | NA   | 0 | 1 | Not-determined | Genome-fragment | NA    | 0     | 0 |
| S2_k141_105487                             | 4099  | No  | NA   | 0 | 1 | Not-determined | Genome-fragment | NA    | 0     | 0 |
| S2_k141_84775                              | 1668  | No  | NA   | 0 | 0 | Not-determined | Genome-fragment | NA    | 0     | 0 |
| S2_k141_126126                             | 1155  | No  | NA   | 0 | 0 | Not-determined | Genome-fragment | NA    | 0     | 0 |
| S4_k141_55552                              | 4477  | No  | NA   | 0 | 6 | Low-quality    | Genome-fragment | 1.66  | 0     | 0 |
| S2_k141_208885                             | 6701  | No  | NA   | 0 | 4 | Not-determined | Genome-fragment | NA    | 0     | 0 |
| S5-final-viral-combined_k141_103856  full  | 4478  | No  | NA   | 3 | 0 | Low-quality    | Genome-fragment | 6     | 0     | 0 |
| S17-final-viral-combined_k141_17599  full  | 4480  | No  | NA   | 0 | 3 | Low-quality    | Genome-fragment | 11.7  | 0     | 0 |
| S2-final-viral-combined_k141_234420  full  | 4480  | Yes | 1440 | 1 | 1 | Low-quality    | Genome-fragment | 1.53  | 67.86 | 0 |
| S2_k141_84862                              | 1634  | No  | NA   | 0 | 0 | Not-determined | Genome-fragment | NA    | 0     | 0 |
| S2_k141_53636                              | 3731  | No  | NA   | 0 | 4 | Not-determined | Genome-fragment | NA    | 0     | 0 |
| S2_k141_178404                             | 1746  | No  | NA   | 0 | 1 | Not-determined | Genome-fragment | NA    | 0     | 0 |
| S2_k141_22754                              | 7915  | No  | NA   | 0 | 2 | Not-determined | Genome-fragment | NA    | 0     | 0 |
| S2_k141_229942                             | 1317  | No  | NA   | 0 | 0 | Not-determined | Genome-fragment | NA    | 0     | 0 |
| S2_k141_105588                             | 10598 | No  | NA   | 0 | 2 | Not-determined | Genome-fragment | NA    | 0     | 0 |
| S2_k141_157150                             | 1817  | No  | NA   | 0 | 1 | Not-determined | Genome-fragment | NA    | 0     | 0 |
| S2_k141_74334                              | 4350  | No  | NA   | 0 | 2 | Not-determined | Genome-fragment | NA    | 0     | 0 |
| S2-final-viral-combined_k141_93139  full   | 4481  | No  | NA   | 0 | 1 | Low-quality    | Genome-fragment | 9.86  | 0     | 0 |
| S6-final-viral-combined_k141_24360  full   | 4482  | Yes | 1266 | 4 | 3 | Low-quality    | Genome-fragment | 2.21  | 71.75 | 0 |
| S2_k141_229978                             | 1410  | No  | NA   | 0 | 0 | Not-determined | Genome-fragment | NA    | 0     | 0 |
| S2_k141_157166                             | 8018  | No  | NA   | 0 | 6 | Not-determined | Genome-fragment | NA    | 0     | 0 |
| S2_k141_53717                              | 1413  | No  | NA   | 0 | 1 | Not-determined | Genome-fragment | NA    | 0     | 0 |
| S2_k141_74346                              | 1122  | No  | NA   | 0 | 0 | Not-determined | Genome-fragment | NA    | 0     | 0 |
| S2_k141_74351                              | 3850  | No  | NA   | 0 | 2 | Not-determined | Genome-fragment | NA    | 0     | 0 |
| S2_k141_143880                             | 5534  | No  | NA   | 0 | 3 | Not-determined | Genome-fragment | NA    | 0     | 0 |
| S2_k141_105634                             | 6237  | No  | NA   | 0 | 2 | Not-determined | Genome-fragment | NA    | 0     | 0 |
| S2_k141_84949                              | 5015  | No  | NA   | 0 | 4 | Not-determined | Genome-fragment | NA    | 0     | 0 |
| S2_k141_22794                              | 7266  | No  | NA   | 0 | 3 | Not-determined | Genome-fragment | NA    | 0     | 0 |
| S2_k141_115749                             | 1342  | No  | NA   | 0 | 1 | Not-determined | Genome-fragment | NA    | 0     | 0 |
| S2_k141_157232                             | 1529  | No  | NA   | 0 | 1 | Not-determined | Genome-fragment | NA    | 0     | 0 |
| S2_k141_95179                              | 3205  | No  | NA   | 0 | 1 | Not-determined | Genome-fragment | NA    | 0     | 0 |
| S12_k141_351889                            | 4482  | Yes | 2253 | 3 | 2 | Low-quality    | Genome-fragment | 4.75  | 49.73 | 0 |
| S2_k141_157246                             | 1234  | No  | NA   | 0 | 1 | Not-determined | Genome-fragment | NA    | 0     | 0 |
| S4_k141_3733                               | 4483  | No  | NA   | 3 | 0 | Low-quality    | Genome-fragment | 12.85 | 0     | 0 |
| S8-final-viral-combined_k141_238061  full  | 4483  | No  | NA   | 0 | 4 | Low-quality    | Genome-fragment | 2.82  | 0     | 0 |
| S2_k141_32757                              | 3424  | No  | NA   | 0 | 2 | Not-determined | Genome-fragment | NA    | 0     | 0 |
| S2_k141_53792                              | 3024  | No  | NA   | 0 | 0 | Not-determined | Genome-fragment | NA    | 0     | 0 |
| S2_k141_105683                             | 1170  | No  | NA   | 0 | 1 | Not-determined | Genome-fragment | NA    | 0     | 0 |
| S2_k141_74392                              | 4414  | No  | NA   | 0 | 0 | Not-determined | Genome-fragment | NA    | 0     | 0 |
| S6-final-viral-combined_k141_76684  full   | 4484  | No  | NA   | 0 | 1 | Low-quality    | Genome-fragment | 3.24  | 0     | 0 |
| S2_k141_198281                             | 4313  | No  | NA   | 0 | 2 | Not-determined | Genome-fragment | NA    | 0     | 0 |
| S2_k141_151386                             | 2758  | No  | NA   | 0 | 1 | Not-determined | Genome-fragment | NA    | 0     | 0 |
| S2_k141_219201                             | 1135  | No  | NA   | 0 | 0 | Not-determined | Genome-fragment | NA    | 0     | 0 |
| S8_k141_64886                              | 4484  | No  | NA   | 0 | 1 | Low-quality    | Genome-fragment | 2.08  | 0     | 0 |
| S2_k141_53816                              | 3114  | No  | NA   | 0 | 1 | Not-determined | Genome-fragment | NA    | 0     | 0 |
| S9-final-viral-combined_k141_5808  full    | 4485  | No  | NA   | 0 | 1 | Low-quality    | Genome-fragment | 3.5   | 0     | 0 |
| S2_k141_22856                              | 1542  | No  | NA   | 0 | 0 | Not-determined | Genome-fragment | NA    | 0     | 0 |
| S2_k141_105729                             | 1055  | No  | NA   | 0 | 0 | Not-determined | Genome-fragment | NA    | 0     | 0 |
| S2_k141_22860                              | 1266  | No  | NA   | 0 | 0 | Not-determined | Genome-fragment | NA    | 0     | 0 |
| S1_k141_35170                              | 4485  | No  | NA   | 0 | 0 | Low-quality    | Genome-fragment | 9.09  | 0     | 0 |
| S12-final-viral-combined_k141_238463  full | 4485  | No  | NA   | 0 | 3 | Low-quality    | Genome-fragment | 1.32  | 0     | 0 |
| S2_k141_24079                              | 4153  | No  | NA   | 0 | 1 | Not-determined | Genome-fragment | NA    | 0     | 0 |
| S12-final-viral-combined_k141_369530  full | 4486  | No  | NA   | 0 | 4 | Low-quality    | Genome-fragment | 2.06  | 0     | 0 |
| S2_k141_167998                             | 1387  | No  | NA   | 0 | 1 | Not-determined | Genome-fragment | NA    | 0     | 0 |
| S2_k141_230137                             | 1605  | No  | NA   | 0 | 0 | Not-determined | Genome-fragment | NA    | 0     | 0 |
| S2_k141_230144                             | 1087  | No  | NA   | 0 | 1 | Not-determined | Genome-fragment | NA    | 0     | 0 |
| S6-final-viral-combined_k141_20737  full   | 4486  | No  | NA   | 0 | 2 | Low-quality    | Genome-fragment | 2.77  | 0     | 0 |
| S11_k141_313153                            | 4487  | No  | NA   | 0 | 1 | Not-determined | Genome-fragment | 4.77  | 0     | 0 |
| S2_k141_209072                             | 1090  | No  | NA   | 0 | 1 | Not-determined | Genome-fragment | NA    | 0     | 0 |
| S2_k141_53881                              | 16355 | No  | NA   | 7 | 0 | Medium-quality | Genome-fragment | 71.23 | 0     | 0 |
| S2_k141_115850                             | 8069  | No  | NA   | 0 | 1 | Not-determined | Genome-fragment | NA    | 0     | 0 |
| S2_k141_136895                             | 1219  | No  | NA   | 0 | 1 | Not-determined | Genome-fragment | NA    | 0     | 0 |
| S2_k141_85123                              | 5442  | No  | NA   | 0 | 6 | Not-determined | Genome-fragment | NA    | 0     | 0 |
| S2_k141_95421                              | 3156  | No  | NA   | 0 | 3 | Not-determined | Genome-fragment | NA    | 0     | 0 |
| S2_k141_240157                             | 7074  | No  | NA   | 0 | 1 | Not-determined | Genome-fragment | NA    | 0     | 0 |
| S8-final-viral-combined_k141_22198  full   | 4487  | No  | NA   | 0 | 3 | Low-quality    | Genome-fragment | 2.09  | 0     | 0 |
| S8_k141_207684                             | 4488  | No  | NA   | 2 | 0 | Low-quality    | Genome-fragment | 7.27  | 0     | 0 |
| S2_k141_64213                              | 2251  | No  | NA   | 0 | 2 | Not-determined | Genome-fragment | NA    | 0     | 0 |
| S2_k141_240169                             | 3945  | No  | NA   | 0 | 1 | Not-determined | Genome-fragment | NA    | 0     | 0 |
| S2_k141_95459                              | 2952  | No  | NA   | 0 | 0 | Not-determined | Genome-fragment | NA    | 0     | 0 |
| S2_k141_64246                              | 1259  | No  | NA   | 0 | 0 | Not-determined | Genome-fragment | NA    | 0     | 0 |
| S17-final-viral-combined_k141_94678  full  | 4489  | No  | NA   | 0 | 1 | Low-quality    | Genome-fragment | 10.55 | 0     | 0 |
| S12-final-viral-combined_k141_80526  full  | 4489  | No  | NA   | 0 | 1 | Low-quality    | Genome-fragment | 1.35  | 0     | 0 |
| S2_k141_219113                             | 3886  | No  | NA   | 0 | 2 | Not-determined | Genome-fragment | NA    | 3.4   | 0 |
| S17-final-viral-combined_k141_216449  full | 4490  | No  | NA   | 0 | 1 | Low-quality    | Genome-fragment | NA    | 0     | 0 |
| S2_k141_95496                              | 5671  | No  | NA   | 0 | 1 | Not-determined | Genome-fragment | NA    | 0     | 0 |
| S2_k141_219321                             | 11342 | No  | NA   | 0 | 2 | Not-determined | Genome-fragment | NA    | 0     | 0 |
| S2_k141_219323                             | 1235  | No  | NA   | 0 | 1 | Not-determined | Genome-fragment | NA    | 0     | 0 |
| S2_k141_74465                              | 10075 | No  | NA   | 0 | 0 | Not-determined | Genome-fragment | NA    | 0     | 0 |
| S2_k141_32878                              | 2466  | No  | NA   | 0 | 2 | Not-determined | Genome-fragment | NA    | 0     | 0 |
| S2_k141_198540                             | 4171  | No  | NA   | 0 | 1 | Not-determined | Genome-fragment | NA    | 0     | 0 |
| S2_k141_2121                               | 4841  | No  | NA   | 0 | 1 | Not-determined | Genome-fragment | NA    | 0     | 0 |
| S2_k141_32930                              | 1135  | No  | NA   | 0 | 0 | Not-determined | Genome-fragment | NA    | 0     | 0 |
| S2_k141_105887                             | 1959  | No  | NA   | 0 | 0 | Not-determined | Genome-fragment | NA    | 0     | 0 |
| S2_k141_2137                               | 1614  | No  | NA   | 0 | 0 | Not-determined | Genome-fragment | NA    | 0     | 0 |
| S2_k141_147062                             | 1060  | No  | NA   | 0 | 0 | Not-determined | Genome-fragment | NA    | 0     | 0 |
| S2_k141_2155                               | 1091  | No  | NA   | 0 | 0 | Not-determined | Genome-fragment | NA    | 0     | 0 |
| S6-final-viral-combined_k141_127219  full  | 4490  | No  | NA   | 0 | 4 | Low-quality    | Genome-fragment | 7.44  | 0     | 0 |
| S2_k141_85244                              | 1249  | No  | NA   | 0 | 1 | Not-determined | Genome-fragment | NA    | 0     | 0 |
| S2_k141_105956                             | 2021  | No  | NA   | 0 | 0 | Not-determined | Genome-fragment | NA    | 0     | 0 |
| S7-final-viral-combined_k141_79412  full   | 4491  | No  | NA   | 0 | 0 | Low-quality    | Genome-fragment | 3.9   | 0     | 0 |
| S2-final-viral-combined_k141_225108  full  | 4491  | No  | NA   | 2 | 0 | Low-quality    | Genome-fragment | 10.87 | 0     | 0 |
| S2-final-viral-combined_k141_217286  full  | 4491  | No  | NA   | 0 | 2 | Low-quality    | Genome-fragment | 5.01  | 0     | 0 |
| S8-final-viral-combined_k141_107374  full  | 4491  | Yes | 3233 | 1 | 1 | Low-quality    | Genome-fragment | 5.8   | 28.81 | 0 |
| S2_k141_44734                              | 1013  | No  | NA   | 0 | 1 | Not-determined | Genome-fragment | NA    | 0     | 0 |
| S2_k141_209111                             | 3215  | No  | NA   | 0 | 3 | Not-determined | Genome-fragment | NA    | 0     | 0 |
| S2_k141_54076                              | 1465  | No  | NA   | 0 | 1 | Not-determined | Genome-fragment | NA    | 0     | 0 |
| S2_k141_147181                             | 4817  | No  | NA   | 0 | 1 | Not-determined | Genome-fragment | NA    | 0     | 0 |
| S2_k141_85286                              | 1649  | No  | NA   | 0 | 0 | Not-determined | Genome-         |       |       |   |



|                                           |          |    |      |   |                |                 |       |       |
|-------------------------------------------|----------|----|------|---|----------------|-----------------|-------|-------|
| S2_k141_188829                            | 1041 No  | NA | 0    | 1 | Not-determined | Genome-fragment | NA    | 0     |
| S5_k141_55010                             | 4499 No  | NA | 4    | 0 | Low-quality    | Genome-fragment | 10.36 | 0     |
| S2_k141_188841                            | 1339 No  | NA | 0    | 0 | Not-determined | Genome-fragment | NA    | 0     |
| S2-final-viral-combined_k141_179459 full  | 4499 No  | NA | 0    | 3 | Low-quality    | Genome-fragment | 5.83  | 0     |
| S2_k141_106043                            | 1714 No  | NA | 0    | 1 | Not-determined | Genome-fragment | NA    | 0     |
| S2_k141_45003                             | 1384 No  | NA | 0    | 2 | Not-determined | Genome-fragment | NA    | 0     |
| S2_k141_230650                            | 3444 No  | NA | 0    | 1 | Not-determined | Genome-fragment | NA    | 0     |
| S17-final-viral-combined_k141_33348 full  | 4501 Yes | NA | 3558 | 1 | Low-quality    | Genome-fragment | 8.09  | 20.95 |
| S8-final-viral-combined_k141_25129 full   | 4502 No  | NA | 0    | 1 | Low-quality    | Genome-fragment | 4.57  | 0     |
| S2_k141_240397                            | 4174 No  | NA | 0    | 1 | Not-determined | Genome-fragment | NA    | 0     |
| S2_k141_116158                            | 1167 No  | NA | 0    | 1 | Not-determined | Genome-fragment | NA    | 0     |
| S2_k141_188889                            | 1010 No  | NA | 0    | 0 | Not-determined | Genome-fragment | NA    | 0     |
| S2_k141_23238                             | 1692 No  | NA | 0    | 1 | Not-determined | Genome-fragment | NA    | 0     |
| S11_k141_95920                            | 4503 No  | NA | 0    | 1 | Low-quality    | Genome-fragment | 5.54  | 0     |
| S2_k141_240441                            | 1314 No  | NA | 0    | 1 | Not-determined | Genome-fragment | NA    | 0     |
| S2_k141_217709                            | 1043 No  | NA | 0    | 0 | Not-determined | Genome-fragment | NA    | 0     |
| S1-final-viral-combined_k141_376463 full  | 4503 Yes | NA | 1020 | 1 | 3 Low-quality  | Genome-fragment | 19.32 | 77.35 |
| S2_k141_64423                             | 1372 No  | NA | 0    | 1 | Not-determined | Genome-fragment | NA    | 0     |
| S2_k141_74839                             | 9555 No  | NA | 0    | 0 | Not-determined | Genome-fragment | NA    | 0     |
| S2_k141_117241                            | 1153 No  | NA | 0    | 2 | Not-determined | Genome-fragment | NA    | 0     |
| S2_k141_240474                            | 1047 No  | NA | 0    | 1 | Not-determined | Genome-fragment | NA    | 0     |
| S3-final-viral-combined_k141_68189 full   | 4503 No  | NA | 3    | 0 | Not-determined | Genome-fragment | 11.99 | 0     |
| S7-final-viral-combined_k141_20751 full   | 4503 No  | NA | 0    | 5 | Low-quality    | Genome-fragment | 1.86  | 0     |
| S2_k141_157899                            | 1782 No  | NA | 0    | 1 | Not-determined | Genome-fragment | NA    | 0     |
| S2_k141_2393                              | 2441 No  | NA | 0    | 0 | Not-determined | Genome-fragment | NA    | 0     |
| S2_k141_216740                            | 1148 No  | NA | 0    | 0 | Not-determined | Genome-fragment | NA    | 0     |
| S2_k141_45122                             | 1151 No  | NA | 0    | 0 | Not-determined | Genome-fragment | NA    | 0     |
| S9-final-viral-combined_k141_85217 full   | 4506 No  | NA | 4    | 0 | Low-quality    | Genome-fragment | 10.59 | 0     |
| S2_k141_215783                            | 1288 No  | NA | 0    | 0 | Not-determined | Genome-fragment | NA    | 0     |
| S2_k141_198703                            | 1740 No  | NA | 0    | 3 | Not-determined | Genome-fragment | NA    | 0     |
| S2_k141_116225                            | 3268 No  | NA | 0    | 2 | Not-determined | Genome-fragment | NA    | 0     |
| S4_k141_57680                             | 4506 No  | NA | 1    | 0 | Low-quality    | Genome-fragment | 7.8   | 0     |
| S2_k141_95923                             | 1316 No  | NA | 0    | 0 | Not-determined | Genome-fragment | NA    | 0     |
| S11_k141_206481                           | 4507 No  | NA | 4    | 0 | Low-quality    | Genome-fragment | 9.08  | 0     |
| S3-final-viral-combined_k141_70798 full   | 4510 No  | NA | 0    | 0 | Low-quality    | Genome-fragment | 9.07  | 0     |
| S2_k141_33423                             | 1006 No  | NA | 0    | 0 | Not-determined | Genome-fragment | NA    | 0     |
| S2_k141_2464                              | 1703 No  | NA | 0    | 1 | Not-determined | Genome-fragment | NA    | 0     |
| S2_k141_147388                            | 1019 No  | NA | 0    | 0 | Not-determined | Genome-fragment | NA    | 0     |
| S12-final-viral-combined_k141_80920 full  | 4510 No  | NA | 2    | 0 | Low-quality    | Genome-fragment | 9.53  | 0     |
| S2_k141_64580                             | 4882 No  | NA | 0    | 1 | Not-determined | Genome-fragment | NA    | 0     |
| S2_k141_179880                            | 5306 No  | NA | 0    | 2 | Not-determined | Genome-fragment | NA    | 0     |
| S8_k141_197004                            | 4510 No  | NA | 0    | 2 | Low-quality    | Genome-fragment | 1.16  | 0     |
| S2-final-viral-combined_k141_213017 full  | 4511 No  | NA | 0    | 1 | Low-quality    | Genome-fragment | 7.58  | 0     |
| S2-final-viral-combined_k141_158036 full  | 4512 No  | NA | 2    | 0 | Low-quality    | Genome-fragment | 9.2   | 0     |
| S2_k141_96039                             | 1135 No  | NA | 0    | 0 | Not-determined | Genome-fragment | NA    | 0     |
| S8-final-viral-combined_k141_108584 full  | 4512 No  | NA | 2    | 0 | Low-quality    | Genome-fragment | 8.51  | 0     |
| S2_k141_209571                            | 3127 No  | NA | 0    | 2 | Not-determined | Genome-fragment | NA    | 0     |
| S17_k141_260032                           | 4513 No  | NA | 0    | 2 | Low-quality    | Genome-fragment | 1.97  | 0     |
| S2-final-viral-combined_k141_12401 full   | 4513 No  | NA | 1    | 0 | Low-quality    | Genome-fragment | 6.83  | 0     |
| S4_k141_34632                             | 4513 No  | NA | 1    | 0 | Low-quality    | Genome-fragment | 4.76  | 0     |
| S2-final-viral-combined_k141_144542 full  | 4514 No  | NA | 1    | 0 | Low-quality    | Genome-fragment | 5.97  | 0     |
| S2_k141_116234                            | 1292 No  | NA | 0    | 0 | Not-determined | Genome-fragment | NA    | 0     |
| S2_k141_12980                             | 9478 No  | NA | 0    | 1 | Not-determined | Genome-fragment | NA    | 0     |
| S2_k141_230882                            | 2325 No  | NA | 0    | 2 | Not-determined | Genome-fragment | NA    | 0     |
| S2_k141_126930                            | 1021 No  | NA | 0    | 1 | Not-determined | Genome-fragment | NA    | 0     |
| S12_k141_14124                            | 4515 No  | NA | 0    | 1 | Low-quality    | Genome-fragment | 6.77  | 0     |
| S2_k141_137479                            | 1894 No  | NA | 0    | 5 | Not-determined | Genome-fragment | NA    | 0     |
| S8-final-viral-combined_k141_23543 full   | 4518 No  | NA | 2    | 0 | Low-quality    | Genome-fragment | 10.07 | 0     |
| S2_k141_33585                             | 1359 No  | NA | 0    | 1 | Not-determined | Genome-fragment | NA    | 0     |
| S11-final-viral-combined_k141_263038 full | 4519 Yes | NA | 2188 | 1 | Low-quality    | Genome-fragment | 3.64  | 51.58 |
| S2_k141_168779                            | 1183 No  | NA | 0    | 0 | Not-determined | Genome-fragment | NA    | 0     |
| S2_k141_126959                            | 1310 No  | NA | 0    | 1 | Not-determined | Genome-fragment | NA    | 0     |
| S17-final-viral-combined_k141_62415 full  | 4519 No  | NA | 0    | 2 | Low-quality    | Genome-fragment | 5.42  | 0     |
| S2_k141_137528                            | 1473 No  | NA | 0    | 1 | Not-determined | Genome-fragment | NA    | 0     |
| S2_k141_168805                            | 1210 No  | NA | 0    | 2 | Not-determined | Genome-fragment | NA    | 0     |
| S2_k141_13043                             | 1902 No  | NA | 0    | 1 | Not-determined | Genome-fragment | NA    | 0     |
| S2_k141_127036                            | 6316 No  | NA | 0    | 4 | Not-determined | Genome-fragment | NA    | 0     |
| S2_k141_75120                             | 1318 No  | NA | 0    | 2 | Not-determined | Genome-fragment | NA    | 0     |
| S2_k141_147611                            | 1540 No  | NA | 0    | 1 | Not-determined | Genome-fragment | NA    | 0     |
| S2_k141_54727                             | 4657 No  | NA | 0    | 1 | Not-determined | Genome-fragment | NA    | 0     |
| S2_k141_189349                            | 1062 No  | NA | 0    | 0 | Not-determined | Genome-fragment | NA    | 0     |
| S1-final-viral-combined_k141_301172 full  | 4520 Yes | NA | 1260 | 1 | Low-quality    | Genome-fragment | 1.08  | 72.12 |
| S2_k141_85906                             | 3695 No  | NA | 0    | 2 | Not-determined | Genome-fragment | NA    | 0     |
| S2_k141_23562                             | 13618 No | NA | 3    | 0 | High-quality   | High-quality    | 99.98 | 0     |
| S2_k141_116395                            | 1125 No  | NA | 0    | 0 | Not-determined | Genome-fragment | NA    | 0     |
| S2_k141_106366                            | 4209 No  | NA | 0    | 1 | Not-determined | Genome-fragment | NA    | 0     |
| S2_k141_45489                             | 2487 No  | NA | 0    | 1 | Not-determined | Genome-fragment | NA    | 0     |
| S1-final-viral-combined_k141_123208 full  | 4520 No  | NA | 0    | 0 | Low-quality    | Genome-fragment | 2.83  | 0     |
| S2_k141_106375                            | 1296 No  | NA | 0    | 1 | Not-determined | Genome-fragment | NA    | 0     |
| S2_k141_168955                            | 7203 No  | NA | 0    | 4 | Not-determined | Genome-fragment | NA    | 0     |
| S7-final-viral-combined_k141_134848 full  | 4520 No  | NA | 0    | 4 | Low-quality    | Genome-fragment | 8.99  | 0     |
| S2_k141_2694                              | 1091 No  | NA | 0    | 2 | Not-determined | Genome-fragment | NA    | 0     |
| S2_k141_127099                            | 1389 No  | NA | 0    | 2 | Not-determined | Genome-fragment | NA    | 0     |
| S2_k141_54836                             | 1296 No  | NA | 0    | 2 | Not-determined | Genome-fragment | NA    | 0     |
| S2_k141_209794                            | 1696 No  | NA | 0    | 0 | Not-determined | Genome-fragment | NA    | 0     |
| S9-final-viral-combined_k141_41747 full   | 4521 No  | NA | 0    | 3 | Low-quality    | Genome-fragment | 2.28  | 0     |
| S2_k141_116440                            | 1399 No  | NA | 0    | 1 | Not-determined | Genome-fragment | NA    | 0     |
| S2_k141_96417                             | 1147 No  | NA | 0    | 2 | Not-determined | Genome-fragment | NA    | 0     |
| S2_k141_23670                             | 1302 No  | NA | 0    | 0 | Not-determined | Genome-fragment | NA    | 0     |
| S2_k141_158175                            | 1242 No  | NA | 0    | 0 | Not-determined | Genome-fragment | NA    | 0     |
| S8-final-viral-combined_k141_45035 full   | 4521 No  | NA | 2    | 0 | Low-quality    | Genome-fragment | 7.84  | 0     |
| S17-final-viral-combined_k141_62306 full  | 4522 No  | NA | 1    | 2 | Low-quality    | Genome-fragment | 2.22  | 0     |
| S2_k141_147742                            | 1199 No  | NA | 0    | 0 | Not-determined | Genome-fragment | NA    | 0     |
| S2_k141_13206                             | 1136 No  | NA | 0    | 0 | Not-determined | Genome-fragment | NA    | 0     |
| S2_k141_158199                            | 3959 No  | NA | 0    | 2 | Not-determined | Genome-fragment | NA    | 0     |
| S2_k141_147751                            | 3420 No  | NA | 0    | 1 | Not-determined | Genome-fragment | NA    | 0     |
| S2_k141_116454                            | 3069 No  | NA | 0    | 2 | Not-determined | Genome-fragment | NA    | 0     |
| S4_k141_26276                             | 4522 No  | NA | 1    | 2 | Low-quality    | Genome-fragment | 4.12  | 0     |
| S4-final-viral-combined_k141_23135 full   | 4523 No  | NA | 0    | 1 | Low-quality    | Genome-fragment | 5.83  | 0     |
| S2_k141_127248                            | 1401 No  | NA | 0    | 1 | Not-determined | Genome-fragment | NA    | 0     |
| S2_k141_169009                            | 2714 No  | NA | 0    | 2 | Not-determined | Genome-fragment | NA    | 0     |
| S2_k141_33968                             | 1416 No  | NA | 0    | 1 | Not-determined | Genome-fragment | NA    | 0     |
| S7-final-viral-combined_k141_127901 full  | 4524 No  | NA | 0    | 0 | Low-quality    | Genome-fragment | 7.67  | 0     |
| S2_k141_179412                            | 1255 No  | NA | 0    | 0 | Not-determined | Genome-fragment | NA    | 0     |
| S2_k141_209879                            | 1015 No  | NA | 0    | 2 | Not-determined | Genome-fragment | NA    | 0     |
| S2_k141_147788                            | 1535 No  | NA | 0    | 0 | Not-determined | Genome-fragment | NA    | 0     |
| S2_k141_179422                            | 1193 No  | NA | 0    | 0 | Not-determined | Genome-fragment | NA    | 0     |
| S2_k141_231058                            | 1168 No  | NA | 0    | 1 | Not-determined | Genome-fragment | NA    | 0     |
| S2_k141_158149                            | 7187 No  | NA | 0    | 0 | Not-determined | Genome-fragment | NA    | 0     |
| S17_k141_229526                           | 4525 No  | NA | 0    | 0 | Low-quality    | Genome-fragment | 5.46  | 0     |
| S2_k141_169052                            | 1338 No  | NA | 0    | 2 | Not-determined | Genome-fragment | NA    | 0     |
| S5-final-viral-combined_k141_16866 full   | 4526 No  | NA | 4    | 0 | Low-quality    | Genome-fragment | 9.94  | 0     |
| S2_k141_64855                             | 3291 No  | NA | 0    | 2 | Not-determined | Genome-fragment | NA    | 0     |
| S2_k141_231080                            | 1237 No  | NA | 0    | 1 | Not-determined | Genome-fragment | NA    | 0     |
| S2_k141_137781                            | 1479 No  | NA | 0    | 1 | Not-determined | Genome-fragment | NA    | 0     |
| S2_k141_45707                             | 2280 No  | NA | 0    | 2 | Not-determined | Genome-fragment | NA    | 0     |
| S2_k141_96533                             | 1095 No  | NA | 0    | 1 | Not-determined | Genome-fragment | NA    | 0     |
| S2_k141_96543                             | 1148 No  | NA | 0    | 0 | Not-determined | Genome-fragment | NA    | 0     |
| S2_k141_999050                            | 1534 No  | NA | 0    | 1 | Not-determined | Genome-fragment | NA    | 0     |
| S2-final-viral-combined_k141_236107 full  | 4526 No  | NA | 0    | 3 | Low-quality    | Genome-fragment | 2.59  | 0     |
| S2_k141_96547                             | 3181 No  | NA | 0    | 1 | Not-determined | Genome-fragment | NA    | 0     |
| S2_k141_64500                             | 1048 No  | NA | 0    | 1 | Not-determined | Genome-fragment | NA    | 0     |
| S17-final-viral-combined_k141_188626 full | 4527 No  | NA | 8    | 0 | Low-quality    | Genome-fragment | 10.68 | 0     |
| S2_k141_96550                             | 4387 No  | NA | 0    | 1 | Not-determined | Genome-fragment | NA    | 0     |
| S2_k141_2848                              | 1642 No  | NA | 0    | 1 | Not-determined | Genome-fragment | NA    | 0     |
| S2_k141_240907                            | 1595 No  | NA | 0    | 0 | Not-determined | Genome-fragment | NA    | 0     |
| S2_k141_189676                            | 1118 No  | NA | 0    | 1 | Not-determined | Genome-fragment | NA    | 0     |
| S2_k141_106618                            | 1162 No  | NA | 0    | 1 | Not-determined | Genome-fragment | NA    | 0     |
| S2_k141_219599                            | 1678 No  | NA | 0    | 0 | Not-determined | Genome-fragment | NA    | 0     |
| S2_k141_106636                            | 3279 No  | NA | 0    | 1 | Not-determined | Genome-fragment | NA    | 0     |
| S2_k141_127739                            | 1448 No  | NA | 0    | 1 | Not-determined | Genome-fragment | NA    | 0     |
| S2_k141_169136                            | 1512 No  | NA | 0    | 0 | Not-determined | Genome-fragment | NA    | 0     |
| S8-final-viral-combined_k141_113701 full  | 4527 No  | NA | 1    | 0 | Low-quality    | Genome-fragment | 2.94  | 0     |
| S2_k141_231146                            | 2389 No  | NA | 0    | 1 | Not-determined | Genome-fragment | NA    | 0     |
| S2_k141_220005                            | 2712 No  | NA | 0    | 1 | Not-determined | Genome-fragment | NA    | 0     |
| S2_k141_34113                             | 1046 No  | NA | 0    | 2 | Not-determined | Genome-fragment | NA    | 0     |
| S2_k141_106669                            | 1246 No  | NA | 0    | 1 | Not-determined | Genome-fragment | NA    | 0     |
| S2_k141_96579                             | 1311 No  | NA | 0    | 1 | Not-determined | Genome-fragment | NA    | 0     |
| S7-final-viral-combined_k141_219253 full  | 4529 Yes | NA | 1343 | 1 | 3 Low-quality  | Genome-fragment | 2.59  | 70.35 |
| S2_k141_65029                             | 1082 No  | NA | 0    | 1 | Not-determined | Genome-fragment | NA    | 0     |
| S2_k141_2958                              | 1050 No  | NA | 0    | 0 | Not-determined | Genome-fragment | NA    | 0     |
| S2_k141_169326                            | 1014 No  | NA | 0    | 1 | Not-determined | Genome-fragment | NA    | 0     |
| S2_k141_147903                            | 2448 No  | NA | 0    | 1 | Not-determined | Genome-fragment | NA    | 0     |
| S2_k141_7896                              | 4531 No  | NA | 6    | 0 | Low-quality    | Genome-fragment | 11.26 | 0     |
| S2_k141_231232                            | 2641 No  | NA | 0    | 2 | Not-determined | Genome-fragment | NA    | 0     |
| S2_k141_2984                              | 10803 No | NA | 0    | 2 | Not-determined | Genome-fragment | NA    | 0     |
| S2_k141_86227                             | 2587 No  | NA | 0    | 0 | Not-determined | Genome-fragment | NA    | 0     |
| S2_k141_24159                             | 1125 No  | NA | 0    | 0 | Not-determined | Genome-fragment | NA    | 0     |
| S2_k141_169385                            | 3466 No  | NA | 0    | 1 | Not-determined | Genome-fragment | NA    | 0     |
| S2_k141_54980                             | 4663 No  | NA | 0    | 2 | Not-determined | Genome-fragment | NA    | 0     |
| S2_k141_210092                            | 1583 No  | NA | 0    | 1 | Not-determined | Genome-fragment | NA    | 0     |
| S2_k141_106724                            | 1113 No  | NA | 0    | 1 | Not-determined | Genome-fragment | NA    | 0     |
| S2_k141_45786                             | 13151 No | NA | 0    |   |                |                 |       |       |



|                                           |       |     |    |       |    |                |                 |       |       |
|-------------------------------------------|-------|-----|----|-------|----|----------------|-----------------|-------|-------|
| S11-final-viral-combined_k141_151072 full | 4535  | No  | NA | 5     | 0  | Low-quality    | Genome-fragment | 5.79  | 0     |
| S2_k141_138176                            | 3631  | No  | NA | 0     | 1  | Not-determined | Genome-fragment | NA    | 0     |
| S2_k141_3192                              | 3688  | No  | NA | 0     | 2  | Not-determined | Genome-fragment | NA    | 0     |
| S2_k141_46031                             | 1535  | No  | NA | 0     | 0  | Not-determined | Genome-fragment | NA    | 0     |
| S2_k141_169569                            | 1465  | No  | NA | 0     | 1  | Not-determined | Genome-fragment | NA    | 0     |
| S9_k141_64765                             | 4516  | No  | NA | 1     | 0  | Low-quality    | Genome-fragment | 12.86 | 0     |
| S2_k141_106917                            | 1312  | No  | NA | 0     | 2  | Not-determined | Genome-fragment | NA    | 0     |
| S2_k141_34419                             | 1118  | No  | NA | 0     | 0  | Not-determined | Genome-fragment | NA    | 0     |
| S2_k141_90753                             | 1551  | No  | NA | 0     | 1  | Not-determined | Genome-fragment | NA    | 0     |
| S2_k141_46066                             | 6984  | No  | NA | 0     | 3  | Not-determined | Genome-fragment | NA    | 0     |
| S3-final-viral-combined_k141_69823 full   | 4536  | No  | NA | 0     | 2  | Low-quality    | Genome-fragment | 1.59  | 0     |
| S2_k141_210272                            | 1751  | No  | NA | 0     | 1  | Not-determined | Genome-fragment | NA    | 0     |
| S2_k141_241147                            | 1030  | No  | NA | 0     | 1  | Not-determined | Genome-fragment | NA    | 0     |
| S4-final-viral-combined_k141_99390 full   | 4536  | No  | NA | 2     | 0  | Low-quality    | Genome-fragment | 3.76  | 0     |
| S2_k141_231556                            | 1019  | No  | NA | 0     | 2  | Not-determined | Genome-fragment | NA    | 0     |
| S2_k141_220027                            | 1099  | No  | NA | 0     | 1  | Not-determined | Genome-fragment | NA    | 0     |
| S2_k141_231564                            | 1179  | No  | NA | 0     | 1  | Not-determined | Genome-fragment | NA    | 0     |
| S2_k141_46111                             | 1048  | No  | NA | 0     | 1  | Not-determined | Genome-fragment | NA    | 0     |
| S2_k141_158588                            | 1084  | No  | NA | 0     | 0  | Not-determined | Genome-fragment | NA    | 0     |
| S2_k141_158592                            | 2598  | No  | NA | 0     | 2  | Not-determined | Genome-fragment | NA    | 0     |
| S2_k141_117022                            | 2896  | No  | NA | 0     | 2  | Not-determined | Genome-fragment | NA    | 0     |
| S11-final-viral-combined_k141_85831 full  | 4538  | No  | NA | 3     | 0  | Low-quality    | Genome-fragment | 6.5   | 0     |
| S2_k141_75566                             | 1484  | No  | NA | 0     | 1  | Not-determined | Genome-fragment | NA    | 0     |
| S11-final-viral-combined_k141_4872 full   | 4538  | No  | NA | 0     | 0  | Low-quality    | Genome-fragment | 11.15 | 0     |
| S2_k141_117060                            | 1141  | No  | NA | 0     | 0  | Not-determined | Genome-fragment | NA    | 0     |
| S2_k141_179883                            | 4462  | No  | NA | 0     | 5  | Not-determined | Genome-fragment | NA    | 0     |
| S2_k141_65487                             | 1005  | No  | NA | 0     | 0  | Not-determined | Genome-fragment | NA    | 0     |
| S2_k141_220076                            | 1503  | No  | NA | 0     | 2  | Not-determined | Genome-fragment | NA    | 0     |
| S1-final-viral-combined_k141_117096 full  | 4519  | No  | NA | 0     | 2  | Low-quality    | Genome-fragment | 4.4   | 0     |
| S2_k141_75589                             | 5917  | No  | NA | 0     | 1  | Not-determined | Genome-fragment | NA    | 0     |
| S2_k141_24005                             | 1138  | No  | NA | 0     | 0  | Not-determined | Genome-fragment | NA    | 0     |
| S2_k141_13570                             | 2332  | No  | NA | 0     | 1  | Not-determined | Genome-fragment | NA    | 0     |
| S2_k141_55165                             | 3303  | No  | NA | 0     | 3  | Not-determined | Genome-fragment | NA    | 0     |
| S2_k141_13583                             | 1063  | No  | NA | 0     | 1  | Not-determined | Genome-fragment | NA    | 0     |
| S2_k141_96858                             | 1503  | No  | NA | 0     | 0  | Not-determined | Genome-fragment | NA    | 0     |
| S17-k141_182969                           | 4519  | No  | NA | 0     | 0  | Low-quality    | Genome-fragment | 6.76  | 0     |
| S2_k141_148284                            | 1181  | No  | NA | 0     | 2  | Not-determined | Genome-fragment | NA    | 0     |
| S2_k141_231667                            | 1129  | No  | NA | 0     | 1  | Not-determined | Genome-fragment | NA    | 0     |
| S7_k141_151983                            | 4541  | No  | NA | 0     | 1  | Low-quality    | Genome-fragment | 7.58  | 0     |
| S17-final-viral-combined_k141_92804 full  | 4541  | No  | NA | 8     | 0  | Low-quality    | Genome-fragment | 9.95  | 0     |
| S2_k141_241226                            | 1196  | No  | NA | 0     | 0  | Not-determined | Genome-fragment | NA    | 0     |
| S2_k141_148236                            | 4898  | No  | NA | 2     | 2  | Not-determined | Genome-fragment | NA    | 0     |
| S2_k141_117174                            | 2537  | No  | NA | 0     | 1  | Not-determined | Genome-fragment | NA    | 0     |
| S2_k141_169753                            | 1114  | No  | NA | 0     | 0  | Not-determined | Genome-fragment | NA    | 0     |
| S2_k141_2358                              | 1138  | No  | NA | 0     | 2  | Not-determined | Genome-fragment | NA    | 0     |
| S2_k141_86611                             | 1300  | No  | NA | 0     | 2  | Not-determined | Genome-fragment | NA    | 0     |
| S2_k141_46238                             | 2164  | No  | NA | 0     | 1  | Not-determined | Genome-fragment | NA    | 0     |
| S2-final-viral-combined_k141_168357 full  | 4541  | No  | NA | 0     | 3  | Low-quality    | Genome-fragment | 2.2   | 0     |
| S2_k141_158693                            | 1856  | No  | NA | 0     | 0  | Not-determined | Genome-fragment | NA    | 0     |
| S6_k141_130785                            | 4541  | No  | NA | 0     | 3  | Low-quality    | Genome-fragment | 4.23  | 0     |
| S2_k141_138279                            | 4064  | No  | NA | 0     | 2  | Not-determined | Genome-fragment | NA    | 0     |
| S2_k141_231735                            | 2186  | No  | NA | 0     | 2  | Not-determined | Genome-fragment | NA    | 0     |
| S7-final-viral-combined_k141_102795 full  | 4542  | No  | NA | 0     | 3  | Low-quality    | Genome-fragment | 2.15  | 0     |
| S12-final-viral-combined_k141_334019 full | 4542  | Yes | NA | 3292  | 1  | Low-quality    | Genome-fragment | 4.28  | 27.52 |
| S2_k141_46293                             | 1254  | No  | NA | 0     | 0  | Not-determined | Genome-fragment | NA    | 0     |
| S2_k141_46108                             | 1086  | No  | NA | 0     | 1  | Not-determined | Genome-fragment | NA    | 0     |
| S2_k141_241265                            | 1045  | No  | NA | 0     | 1  | Not-determined | Genome-fragment | NA    | 0     |
| S2_k141_190216                            | 4524  | No  | NA | 0     | 4  | Not-determined | Genome-fragment | NA    | 0     |
| S2_k141_148485                            | 1200  | No  | NA | 0     | 2  | Not-determined | Genome-fragment | NA    | 0     |
| S2_k141_231815                            | 1234  | No  | NA | 0     | 1  | Not-determined | Genome-fragment | NA    | 0     |
| S3-final-viral-combined_k141_129466 full  | 4543  | No  | NA | 2     | 0  | Low-quality    | Genome-fragment | 6.74  | 0     |
| S2_k141_13775                             | 4288  | No  | NA | 0     | 3  | Not-determined | Genome-fragment | NA    | 0     |
| S2_k141_180130                            | 1418  | No  | NA | 0     | 0  | Not-determined | Genome-fragment | NA    | 0     |
| S2_k141_138359                            | 3480  | No  | NA | 0     | 2  | Not-determined | Genome-fragment | NA    | 0     |
| S3-final-viral-combined_k141_36882 full   | 4544  | No  | NA | 0     | 3  | Low-quality    | Genome-fragment | 2.04  | 0     |
| S2_k141_117271                            | 2635  | No  | NA | 0     | 0  | Not-determined | Genome-fragment | NA    | 0     |
| S2_k141_210577                            | 1167  | No  | NA | 0     | 2  | Not-determined | Genome-fragment | NA    | 0     |
| S1-final-viral-combined_k141_387422 full  | 4545  | No  | NA | 1     | 0  | Low-quality    | Genome-fragment | 7.76  | 0     |
| S7-final-viral-combined_k141_226024 full  | 4545  | No  | NA | 0     | 0  | Not-determined | Genome-fragment | NA    | 0     |
| S6-final-viral-combined_k141_60003 full   | 4548  | No  | NA | 1     | 0  | Low-quality    | Genome-fragment | 10.61 | 0     |
| S2_k141_148556                            | 7059  | No  | NA | 0     | 1  | Not-determined | Genome-fragment | NA    | 0     |
| S2_k141_138138                            | 1392  | No  | NA | 0     | 0  | Not-determined | Genome-fragment | NA    | 0     |
| S2_k141_180200                            | 2006  | No  | NA | 0     | 1  | Not-determined | Genome-fragment | NA    | 0     |
| S7_k141_40928                             | 4550  | No  | NA | 0     | 0  | Low-quality    | Genome-fragment | 12.89 | 0     |
| S2_k141_169945                            | 1161  | No  | NA | 0     | 1  | Not-determined | Genome-fragment | NA    | 0     |
| S2_k141_241346                            | 2183  | No  | NA | 0     | 1  | Not-determined | Genome-fragment | NA    | 0     |
| S8-final-viral-combined_k141_190470 full  | 4550  | No  | NA | 0     | 1  | Low-quality    | Genome-fragment | 4.03  | 0     |
| S2_k141_190344                            | 1162  | No  | NA | 0     | 1  | Not-determined | Genome-fragment | NA    | 0     |
| S9_k141_4400                              | 4555  | No  | NA | 0     | 0  | Low-quality    | Genome-fragment | 6.94  | 0     |
| S2_k141_169971                            | 2230  | No  | NA | 0     | 2  | Not-determined | Genome-fragment | NA    | 0     |
| S2_k141_46435                             | 1929  | No  | NA | 0     | 1  | Not-determined | Genome-fragment | NA    | 0     |
| S2_k141_241356                            | 1571  | No  | NA | 0     | 1  | Not-determined | Genome-fragment | NA    | 0     |
| S2_k141_55434                             | 3572  | No  | NA | 0     | 1  | Not-determined | Genome-fragment | NA    | 0     |
| S2_k141_55440                             | 3149  | No  | NA | 0     | 1  | Not-determined | Genome-fragment | NA    | 0     |
| S2_k141_65773                             | 1233  | No  | NA | 0     | 0  | Not-determined | Genome-fragment | NA    | 0     |
| S2_k141_158797                            | 4146  | No  | NA | 0     | 1  | Not-determined | Genome-fragment | NA    | 0     |
| S7-final-viral-combined_k141_65976 full   | 4555  | No  | NA | 2     | 0  | Low-quality    | Genome-fragment | 7.45  | 0     |
| S2_k141_58749                             | 4556  | No  | NA | 0     | 0  | Low-quality    | Genome-fragment | 8.73  | 0     |
| S3-final-viral-combined_k141_67303 full   | 4557  | Yes | NA | 2244  | 1  | Low-quality    | Genome-fragment | 50.76 | 0     |
| S2_k141_138468                            | 1208  | No  | NA | 0     | 2  | Not-determined | Genome-fragment | NA    | 0     |
| S2_k141_34796                             | 1042  | No  | NA | 0     | 0  | Not-determined | Genome-fragment | NA    | 0     |
| S1-final-viral-combined_k141_163377 full  | 4558  | No  | NA | 2     | 0  | Low-quality    | Genome-fragment | 11.57 | 0     |
| S2_k141_148688                            | 3719  | No  | NA | 0     | 0  | Not-determined | Genome-fragment | NA    | 0     |
| S11-final-viral-combined_k141_235038 full | 4559  | No  | NA | 0     | 1  | Low-quality    | Genome-fragment | 5.48  | 0     |
| S2_k141_241422                            | 1021  | No  | NA | 0     | 0  | Not-determined | Genome-fragment | NA    | 0     |
| S12-final-viral-combined_k141_301618 full | 4559  | No  | NA | 4     | 0  | Low-quality    | Genome-fragment | 12.08 | 0     |
| S1-final-viral-combined_k141_103512 full  | 4561  | No  | NA | 0     | 2  | Low-quality    | Genome-fragment | 6.2   | 0     |
| S2_k141_180325                            | 1291  | No  | NA | 0     | 1  | Not-determined | Genome-fragment | NA    | 0     |
| S2_k141_3631                              | 2444  | No  | NA | 0     | 1  | Not-determined | Genome-fragment | NA    | 0     |
| S2_k141_190421                            | 3210  | No  | NA | 0     | 2  | Not-determined | Genome-fragment | NA    | 0     |
| S2_k141_232022                            | 1099  | No  | NA | 0     | 0  | Not-determined | Genome-fragment | NA    | 0     |
| S2_k141_107129                            | 5266  | Yes | NA | 46224 | 24 | Low-quality    | Genome-fragment | 62.78 | 12.23 |
| S2_k141_210736                            | 6725  | No  | NA | 0     | 0  | Not-determined | Genome-fragment | NA    | 0     |
| S2_k141_210744                            | 1006  | No  | NA | 0     | 1  | Not-determined | Genome-fragment | NA    | 0     |
| S12-final-viral-combined_k141_254840 full | 4562  | No  | NA | 1     | 0  | Low-quality    | Genome-fragment | 8.41  | 0     |
| S2_k141_210774                            | 1005  | No  | NA | 0     | 0  | Not-determined | Genome-fragment | NA    | 0     |
| S2_k141_46544                             | 4799  | No  | NA | 0     | 1  | Not-determined | Genome-fragment | NA    | 0     |
| S2_k141_75938                             | 1089  | No  | NA | 0     | 0  | Not-determined | Genome-fragment | NA    | 0     |
| S2_k141_241386                            | 16112 | No  | NA | 0     | 10 | Not-determined | Genome-fragment | NA    | 0     |
| S2_k141_117522                            | 1473  | No  | NA | 0     | 0  | Not-determined | Genome-fragment | NA    | 0     |
| S2_k141_100681                            | 4563  | No  | NA | 0     | 0  | Low-quality    | Genome-fragment | 5.2   | 0     |
| S2_k141_24371                             | 2129  | No  | NA | 0     | 2  | Not-determined | Genome-fragment | NA    | 0     |
| S2_k141_34884                             | 1555  | No  | NA | 0     | 1  | Not-determined | Genome-fragment | NA    | 0     |
| S11-final-viral-combined_k141_160638 full | 4564  | No  | NA | 1     | 0  | Low-quality    | Genome-fragment | 5.52  | 0     |
| S2_k141_55678                             | 1211  | No  | NA | 0     | 1  | Not-determined | Genome-fragment | NA    | 0     |
| S2_k141_14045                             | 3127  | No  | NA | 0     | 2  | Not-determined | Genome-fragment | NA    | 0     |
| S2_k141_180424                            | 1187  | No  | NA | 0     | 0  | Not-determined | Genome-fragment | NA    | 0     |
| S2_k141_466025                            | 3543  | No  | NA | 0     | 0  | Not-determined | Genome-fragment | NA    | 0     |
| S2_k141_46607                             | 3726  | No  | NA | 0     | 1  | Not-determined | Genome-fragment | NA    | 0     |
| S2_k141_46609                             | 3797  | No  | NA | 0     | 2  | Not-determined | Genome-fragment | NA    | 0     |
| S2_k141_190515                            | 2088  | No  | NA | 0     | 1  | Not-determined | Genome-fragment | NA    | 0     |
| S5-final-viral-combined_k141_54964 full   | 4564  | No  | NA | 0     | 0  | Low-quality    | Genome-fragment | 11.55 | 0     |
| S2_k141_127736                            | 2796  | No  | NA | 0     | 1  | Not-determined | Genome-fragment | NA    | 0     |
| S2_k141_240090                            | 4565  | No  | NA | 0     | 0  | Low-quality    | Genome-fragment | 8.14  | 0     |
| S2_k141_148828                            | 1535  | No  | NA | 0     | 1  | Not-determined | Genome-fragment | NA    | 0     |
| S2_k141_55747                             | 3385  | No  | NA | 0     | 2  | Not-determined | Genome-fragment | NA    | 0     |
| S2_k141_127787                            | 4262  | No  | NA | 0     | 1  | Not-determined | Genome-fragment | NA    | 0     |
| S2_k141_107542                            | 2419  | No  | NA | 0     | 1  | Not-determined | Genome-fragment | NA    | 0     |
| S2_k141_46669                             | 1507  | No  | NA | 0     | 1  | Not-determined | Genome-fragment | NA    | 0     |
| S4-final-viral-combined_k141_116219 full  | 4565  | No  | NA | 0     | 1  | Low-quality    | Genome-fragment | 12    | 0     |
| S2_k141_190604                            | 1411  | No  | NA | 0     | 1  | Not-determined | Genome-fragment | NA    | 0     |
| S2_k141_232079                            | 1176  | No  | NA | 0     | 0  | Not-determined | Genome-fragment | NA    | 0     |
| S2_k141_232088                            | 1062  | No  | NA | 0     | 0  | Not-determined | Genome-fragment | NA    | 0     |
| S2_k141_232109                            | 5487  | No  | NA | 0     | 9  | Not-determined | Genome-fragment | NA    | 0     |
| S2_k141_107596                            | 3183  | No  | NA | 0     | 1  | Not-determined | Genome-fragment | NA    | 0     |
| S2_k141_55811                             | 3498  | No  | NA | 0     | 2  | Not-determined | Genome-fragment | NA    | 0     |
| S12_k141_1113                             | 4567  | No  | NA | 3     | 0  | Low-quality    | Genome-fragment | 10.28 | 0     |
| S17-k141_130547                           | 4568  | No  | NA | 0     | 2  | Low-quality    | Genome-fragment | 7.79  | 0     |
| S2_k141_138774                            | 1247  | No  | NA | 0     | 0  | Not-determined | Genome-fragment | NA    | 0     |
| S2_k141_127853                            | 1045  | No  | NA | 0     | 1  | Not-determined | Genome-fragment | NA    | 0     |
| S2_k141_24144                             | 4029  | No  | NA | 0     | 0  | Not-determined | Genome-fragment | NA    | 0     |
| S2_k141_97135                             | 3862  | No  | NA | 0     | 2  | Not-determined | Genome-fragment | NA    | 0     |
| S1-final-viral-combined_k141_102093 full  | 4569  | No  | NA | 0     | 0  | Low-quality    | Genome-fragment | 9.14  | 0     |
| S2_k141_117716                            | 32302 | No  | NA | 0     | 9  | Not-determined | Genome-fragment | NA    | 0     |
| S2_k141_76254                             | 1810  | No  | NA | 0     | 1  | Not-determined | Genome-fragment | NA    | 0     |
| S2_k141_76270                             | 5494  | No  | NA | 0     | 1  |                |                 |       |       |



|                                      |       |     |    |      |   |    |                |                 |    |       |       |
|--------------------------------------|-------|-----|----|------|---|----|----------------|-----------------|----|-------|-------|
| S2_k141_138972                       | 1963  | No  | NA | 2807 | 0 | 2  | Not-determined | Genome-fragment | NA | 2.93  | 0     |
| S2-final-viral-combined_k141_155612  | 4573  | Yes | NA |      | 1 | 2  | Low-quality    | Genome-fragment | NA | 38.62 | 0     |
| S2_k141_47025                        | 2008  | No  | NA |      | 0 | 0  | Not-determined | Genome-fragment | NA | 0     | 0     |
| S2_k141_47027                        | 1391  | No  | NA |      | 0 | 0  | Not-determined | Genome-fragment | NA | 0     | 0     |
| S2-final-viral-combined_k141_136617  | 4573  | No  | NA |      | 0 | 0  | Low-quality    | Genome-fragment | NA | 6.98  | 0     |
| S2_k141_56047                        | 1033  | No  | NA |      | 0 | 0  | Not-determined | Genome-fragment | NA | 0     | 0     |
| S2_k141_24690                        | 1714  | No  | NA |      | 0 | 0  | Not-determined | Genome-fragment | NA | 3.39  | 0     |
| S4-final-viral-combined_k141_125412  | 4573  | No  | NA |      | 0 | 0  | Low-quality    | Genome-fragment | NA | 3.39  | 0     |
| S2_k141_270686                       | 39926 | No  | NA |      | 0 | 31 | Not-determined | Genome-fragment | NA | 0     | 0     |
| S8-final-viral-combined_k141_243269  | 4573  | No  | NA |      | 0 | 2  | Low-quality    | Genome-fragment | NA | 2.26  | 0     |
| S2_k141_97589                        | 1237  | No  | NA |      | 0 | 0  | Not-determined | Genome-fragment | NA | 0     | 0     |
| S2_k141_76540                        | 6688  | No  | NA |      | 0 | 1  | Not-determined | Genome-fragment | NA | 0     | 0     |
| S2_k141_170252                       | 1614  | No  | NA |      | 0 | 1  | Not-determined | Genome-fragment | NA | 0     | 0     |
| S2_k141_128008                       | 1579  | No  | NA |      | 0 | 2  | Not-determined | Genome-fragment | NA | 0     | 0     |
| S5-final-viral-combined_k141_212603  | 4574  | No  | NA |      | 1 | 0  | Low-quality    | Genome-fragment | NA | 10.58 | 0     |
| S2_k141_97619                        | 1837  | No  | NA |      | 0 | 2  | Not-determined | Genome-fragment | NA | 0     | 0     |
| S2_k141_170265                       | 1095  | No  | NA |      | 0 | 0  | Not-determined | Genome-fragment | NA | 0     | 0     |
| S2_k141_210924                       | 3293  | No  | NA |      | 0 | 0  | Not-determined | Genome-fragment | NA | 0     | 0     |
| S2_k141_118034                       | 1029  | No  | NA |      | 0 | 1  | Not-determined | Genome-fragment | NA | 0     | 0     |
| S2_k141_56154                        | 1193  | No  | NA |      | 0 | 1  | Not-determined | Genome-fragment | NA | 0     | 0     |
| S2_k141_232477                       | 1025  | No  | NA |      | 0 | 0  | Not-determined | Genome-fragment | NA | 0     | 0     |
| S2_k141_87421                        | 1121  | No  | NA |      | 0 | 0  | Not-determined | Genome-fragment | NA | 0     | 0     |
| S1_k141_104143                       | 4576  | No  | NA |      | 0 | 3  | Low-quality    | Genome-fragment | NA | 2.19  | 0     |
| S2_k141_180876                       | 3333  | No  | NA |      | 0 | 3  | Not-determined | Genome-fragment | NA | 0     | 0     |
| S2_k141_56231                        | 1133  | No  | NA |      | 0 | 0  | Not-determined | Genome-fragment | NA | 0     | 0     |
| S2_k141_47159                        | 1367  | No  | NA |      | 0 | 0  | Not-determined | Genome-fragment | NA | 0     | 0     |
| S11-final-viral-combined_k141_314223 | 4577  | No  | NA |      | 0 | 1  | Low-quality    | Genome-fragment | NA | 3.03  | 0     |
| S17-final-viral-combined_k141_51389  | 4577  | No  | NA |      | 3 | 0  | Low-quality    | Genome-fragment | NA | 11.22 | 0     |
| S6-final-viral-combined_k141_55534   | 4578  | No  | NA |      | 0 | 0  | Low-quality    | Genome-fragment | NA | 11.46 | 0     |
| S8-final-viral-combined_k141_24503   | 4578  | No  | NA |      | 5 | 0  | Low-quality    | Genome-fragment | NA | 9.67  | 0     |
| S2_k141_139193                       | 1047  | No  | NA |      | 0 | 0  | Not-determined | Genome-fragment | NA | 0     | 0     |
| S1_k141_25500                        | 4579  | No  | NA |      | 0 | 1  | Low-quality    | Genome-fragment | NA | 7.11  | 0     |
| S2_k141_180944                       | 1179  | No  | NA |      | 0 | 1  | Not-determined | Genome-fragment | NA | 0     | 0     |
| S2_k141_159299                       | 4270  | No  | NA |      | 0 | 4  | Not-determined | Genome-fragment | NA | 0     | 0     |
| S11_k141_75683                       | 4583  | No  | NA |      | 2 | 0  | Low-quality    | Genome-fragment | NA | 9.57  | 0     |
| S2_k141_190943                       | 1349  | No  | NA |      | 0 | 0  | Not-determined | Genome-fragment | NA | 0     | 0     |
| S2_k141_190815                       | 1011  | No  | NA |      | 0 | 1  | Not-determined | Genome-fragment | NA | 0     | 0     |
| S2_k141_220876                       | 1387  | No  | NA |      | 0 | 1  | Not-determined | Genome-fragment | NA | 0     | 0     |
| S2_k141_63633                        | 1092  | No  | NA |      | 0 | 1  | Not-determined | Genome-fragment | NA | 0     | 0     |
| S3_k141_40445                        | 4583  | No  | NA |      | 0 | 3  | Low-quality    | Genome-fragment | NA | 32.72 | 0     |
| S2_k141_3928                         | 1351  | No  | NA |      | 0 | 0  | Not-determined | Genome-fragment | NA | 0     | 0     |
| S2_k141_220896                       | 3959  | No  | NA |      | 0 | 1  | Not-determined | Genome-fragment | NA | 0     | 0     |
| S2_k141_190842                       | 4377  | No  | NA |      | 0 | 2  | Not-determined | Genome-fragment | NA | 0     | 0     |
| S2_k141_97764                        | 1396  | No  | NA |      | 0 | 1  | Not-determined | Genome-fragment | NA | 0     | 0     |
| S2_k141_200005                       | 1395  | No  | NA |      | 0 | 1  | Not-determined | Genome-fragment | NA | 0     | 0     |
| S2_k141_180882                       | 1237  | No  | NA |      | 0 | 1  | Not-determined | Genome-fragment | NA | 0     | 0     |
| S2_k141_181052                       | 1008  | No  | NA |      | 0 | 1  | Not-determined | Genome-fragment | NA | 0     | 0     |
| S2_k141_76754                        | 1509  | No  | NA |      | 0 | 1  | Not-determined | Genome-fragment | NA | 0     | 0     |
| S2_k141_211091                       | 1047  | No  | NA |      | 0 | 2  | Not-determined | Genome-fragment | NA | 0     | 0     |
| S2_k141_200039                       | 4554  | No  | NA |      | 0 | 3  | Not-determined | Genome-fragment | NA | 0     | 0     |
| S2_k141_56466                        | 1030  | No  | NA |      | 0 | 0  | Not-determined | Genome-fragment | NA | 0     | 0     |
| S2_k141_152864                       | 4582  | No  | NA |      | 0 | 1  | Low-quality    | Genome-fragment | NA | 7.88  | 0     |
| S2_k141_3987                         | 7196  | No  | NA |      | 0 | 5  | Not-determined | Genome-fragment | NA | 0     | 0     |
| S1_k141_249560                       | 4584  | No  | NA |      | 3 | 0  | Low-quality    | Genome-fragment | NA | 9.7   | 0     |
| S2_k141_118156                       | 1124  | No  | NA |      | 0 | 0  | Not-determined | Genome-fragment | NA | 0     | 0     |
| S2_k141_190978                       | 1519  | No  | NA |      | 0 | 3  | Not-determined | Genome-fragment | NA | 0     | 0     |
| S2_k141_155447                       | 1009  | No  | NA |      | 0 | 0  | Not-determined | Genome-fragment | NA | 0     | 0     |
| S2_k141_170656                       | 1266  | No  | NA |      | 0 | 1  | Not-determined | Genome-fragment | NA | 0     | 0     |
| S5-final-viral-combined_k141_29424   | 4585  | No  | NA |      | 1 | 0  | Low-quality    | Genome-fragment | NA | 6.5   | 0     |
| S2_k141_139323                       | 1489  | No  | NA |      | 0 | 1  | Not-determined | Genome-fragment | NA | 0     | 0     |
| S2_k141_139335                       | 3126  | No  | NA |      | 0 | 0  | Not-determined | Genome-fragment | NA | 0     | 0     |
| S2_k141_14608                        | 15406 | No  | NA |      | 0 | 5  | Not-determined | Genome-fragment | NA | 0     | 0     |
| S7-final-viral-combined_k141_195170  | 4585  | Yes | NA | 3534 | 4 | 1  | Low-quality    | Genome-fragment | NA | 7.51  | 22.92 |
| S2_k141_220958                       | 3193  | No  | NA |      | 0 | 1  | Not-determined | Genome-fragment | NA | 0     | 0     |
| S17-final-viral-combined_k141_257628 | 4585  | No  | NA |      | 0 | 0  | Low-quality    | Genome-fragment | NA | 8.54  | 0     |
| S2-final-viral-combined_k141_178106  | 4585  | No  | NA |      | 0 | 3  | Low-quality    | Genome-fragment | NA | 5.48  | 0     |
| S1_k141_264146                       | 4587  | No  | NA |      | 2 | 0  | Low-quality    | Genome-fragment | NA | 16.7  | 0     |
| S2_k141_4113                         | 1063  | No  | NA |      | 0 | 1  | Not-determined | Genome-fragment | NA | 0     | 0     |
| S2_k141_76864                        | 1482  | No  | NA |      | 0 | 0  | Not-determined | Genome-fragment | NA | 0     | 0     |
| S17-final-viral-combined_k141_147593 | 4587  | No  | NA |      | 0 | 5  | Low-quality    | Genome-fragment | NA | 3.26  | 0     |
| S2_k141_232602                       | 2503  | No  | NA |      | 0 | 0  | Not-determined | Genome-fragment | NA | 1.45  | 0     |
| S1-final-viral-combined_k141_187855  | 4589  | No  | NA |      | 0 | 2  | Low-quality    | Genome-fragment | NA | 0     | 0     |
| S2_k141_98044                        | 8717  | No  | NA |      | 0 | 4  | Not-determined | Genome-fragment | NA | 0     | 0     |
| S2_k141_128288                       | 1287  | No  | NA |      | 0 | 0  | Not-determined | Genome-fragment | NA | 0     | 0     |
| S2_k141_56612                        | 1053  | No  | NA |      | 0 | 1  | Not-determined | Genome-fragment | NA | 0     | 0     |
| S12-final-viral-combined_k141_123889 | 4589  | No  | NA |      | 0 | 0  | Low-quality    | Genome-fragment | NA | 4.68  | 0     |
| S2_k141_191116                       | 2170  | No  | NA |      | 0 | 0  | Not-determined | Genome-fragment | NA | 0     | 0     |
| S2_k141_98064                        | 1118  | No  | NA |      | 0 | 0  | Not-determined | Genome-fragment | NA | 0     | 0     |
| S2_k141_87806                        | 1906  | No  | NA |      | 0 | 1  | Not-determined | Genome-fragment | NA | 0     | 0     |
| S2_k141_14735                        | 1510  | No  | NA |      | 0 | 0  | Not-determined | Genome-fragment | NA | 0     | 0     |
| S2_k141_118539                       | 1108  | No  | NA |      | 0 | 1  | Not-determined | Genome-fragment | NA | 0     | 0     |
| S2_k141_76956                        | 1712  | No  | NA |      | 0 | 0  | Not-determined | Genome-fragment | NA | 0     | 0     |
| S9-final-viral-combined_k141_67791   | 4590  | No  | NA |      | 0 | 4  | Low-quality    | Genome-fragment | NA | 1.88  | 0     |
| S2_k141_191140                       | 3351  | No  | NA |      | 0 | 2  | Not-determined | Genome-fragment | NA | 9.14  | 0     |
| S7-final-viral-combined_k141_238024  | 4590  | No  | NA |      | 1 | 0  | Low-quality    | Genome-fragment | NA | 0     | 0     |
| S2_k141_35887                        | 3428  | No  | NA |      | 0 | 2  | Not-determined | Genome-fragment | NA | 0     | 0     |
| S8-final-viral-combined_k141_161289  | 4590  | No  | NA |      | 0 | 3  | Low-quality    | Genome-fragment | NA | 5.55  | 0     |
| S2_k141_66688                        | 1095  | No  | NA |      | 0 | 2  | Not-determined | Genome-fragment | NA | 0     | 0     |
| S2_k141_170860                       | 1030  | No  | NA |      | 0 | 2  | Not-determined | Genome-fragment | NA | 0     | 0     |
| S2_k141_87860                        | 21628 | No  | NA |      | 0 | 17 | Not-determined | Genome-fragment | NA | 0     | 0     |
| S2_k141_170898                       | 2064  | No  | NA |      | 0 | 1  | Not-determined | Genome-fragment | NA | 0     | 0     |
| S2_k141_170901                       | 7038  | No  | NA |      | 0 | 5  | Not-determined | Genome-fragment | NA | 0     | 0     |
| S2_k141_98212                        | 1007  | No  | NA |      | 0 | 0  | Not-determined | Genome-fragment | NA | 0     | 0     |
| S8_k141_243758                       | 4590  | No  | NA |      | 0 | 0  | Low-quality    | Genome-fragment | NA | 11.15 | 0     |
| S2_k141_98220                        | 2012  | No  | NA |      | 0 | 0  | Not-determined | Genome-fragment | NA | 0     | 0     |
| S2_k141_118624                       | 1065  | No  | NA |      | 0 | 0  | Not-determined | Genome-fragment | NA | 0     | 0     |
| S1-final-viral-combined_k141_354511  | 4591  | No  | NA |      | 1 | 2  | Low-quality    | Genome-fragment | NA | 2.91  | 0     |
| S11-final-viral-combined_k141_188689 | 4592  | No  | NA |      | 0 | 2  | Low-quality    | Genome-fragment | NA | 2.45  | 0     |
| S2_k141_159703                       | 1360  | No  | NA |      | 0 | 1  | Not-determined | Genome-fragment | NA | 0     | 0     |
| S2_k141_118633                       | 1924  | No  | NA |      | 0 | 2  | Not-determined | Genome-fragment | NA | 0     | 0     |
| S2_k141_221198                       | 2427  | No  | NA |      | 0 | 0  | Not-determined | Genome-fragment | NA | 0     | 0     |
| S2_k141_56805                        | 2180  | No  | NA |      | 0 | 1  | Not-determined | Genome-fragment | NA | 0     | 0     |
| S2_k141_211380                       | 1240  | No  | NA |      | 0 | 1  | Not-determined | Genome-fragment | NA | 0     | 0     |
| S2_k141_14905                        | 3162  | No  | NA |      | 0 | 1  | Not-determined | Genome-fragment | NA | 0     | 0     |
| S2_k141_118666                       | 1648  | No  | NA |      | 0 | 2  | Not-determined | Genome-fragment | NA | 0     | 0     |
| S2_k141_47676                        | 3288  | No  | NA |      | 0 | 1  | Not-determined | Genome-fragment | NA | 0     | 0     |
| S8_k141_138516                       | 4592  | No  | NA |      | 0 | 0  | Low-quality    | Genome-fragment | NA | 10.34 | 0     |
| S5-final-viral-combined_k141_106139  | 4593  | No  | NA |      | 0 | 3  | Low-quality    | Genome-fragment | NA | 5.07  | 0     |
| S2_k141_241948                       | 7142  | No  | NA |      | 0 | 0  | Not-determined | Genome-fragment | NA | 0     | 0     |
| S2_k141_211433                       | 1060  | No  | NA |      | 0 | 0  | Not-determined | Genome-fragment | NA | 0     | 0     |
| S2_k141_159777                       | 1107  | No  | NA |      | 0 | 2  | Not-determined | Genome-fragment | NA | 0     | 0     |
| S2_k141_211438                       | 1002  | No  | NA |      | 0 | 1  | Not-determined | Genome-fragment | NA | 0     | 0     |
| S2_k141_36070                        | 11228 | No  | NA |      | 0 | 22 | Not-determined | Genome-fragment | NA | 0     | 0     |
| S2_k141_77161                        | 1756  | No  | NA |      | 0 | 0  | Not-determined | Genome-fragment | NA | 0     | 0     |
| S2_k141_159701                       | 6014  | No  | NA |      | 0 | 2  | Not-determined | Genome-fragment | NA | 0     | 0     |
| S5-final-viral-combined_k141_111686  | 4594  | No  | NA |      | 3 | 0  | Low-quality    | Genome-fragment | NA | 11.05 | 0     |
| S2_k141_241979                       | 1466  | No  | NA |      | 0 | 0  | Not-determined | Genome-fragment | NA | 0     | 0     |
| S2_k141_171037                       | 4608  | No  | NA |      | 0 | 3  | Not-determined | Genome-fragment | NA | 0     | 0     |
| S8_k141_168369                       | 4594  | No  | NA |      | 0 | 0  | Low-quality    | Genome-fragment | NA | 7.48  | 0     |
| S2_k141_211481                       | 1976  | No  | NA |      | 0 | 0  | Not-determined | Genome-fragment | NA | 5.11  | 0     |
| S5-final-viral-combined_k141_78543   | 4595  | No  | NA |      | 1 | 0  | Low-quality    | Genome-fragment | NA | 0     | 0     |
| S2_k141_171050                       | 1225  | No  | NA |      | 0 | 0  | Not-determined | Genome-fragment | NA | 0     | 0     |
| S2_k141_159818                       | 1443  | No  | NA |      | 0 | 0  | Not-determined | Genome-fragment | NA | 0     | 0     |
| S2_k141_56876                        | 2260  | No  | NA |      | 0 | 1  | Not-determined | Genome-fragment | NA | 0     | 0     |
| S2_k141_211510                       | 1046  | No  | NA |      | 0 | 0  | Not-determined | Genome-fragment | NA | 0     | 0     |
| S17-k141_116256                      | 4596  | No  | NA |      | 0 | 2  | Low-quality    | Genome-fragment | NA | 2.12  | 0     |
| S2_k141_221351                       | 3471  | No  | NA |      | 0 | 3  | Not-determined | Genome-fragment | NA | 0     | 0     |
| S2_k141_181454                       | 1313  | No  | NA |      | 0 | 1  | Not-determined | Genome-fragment | NA | 0     | 0     |
| S2_k141_211529                       | 3122  | No  | NA |      | 0 | 0  | Not-determined | Genome-fragment | NA | 0     | 0     |
| S4-final-viral-combined_k141_95345   | 4596  | No  | NA |      | 1 | 0  | Low-quality    | Genome-fragment | NA | 8.88  | 0     |
| S2_k141_98391                        | 2712  | No  | NA |      | 0 |    |                |                 |    |       |       |



|                                              |          |    |      |    |                |                 |                 |      |       |
|----------------------------------------------|----------|----|------|----|----------------|-----------------|-----------------|------|-------|
| S2_k141_15416                                | 1541 No  | NA | 0    | 0  | Not-determined | Genome-fragment | NA              | 0    |       |
| S1-final-viral-combined_k141_284194  full    | 4599 No  | NA | 0    | 1  | Low-quality    | Genome-fragment | NA              | 3.8  | 0     |
| S2_k141_200608                               | 1348 No  | NA | 0    | 1  | Not-determined | Genome-fragment | NA              | 0    | 0     |
| S2_k141_15433                                | 2300 No  | NA | 0    | 0  | Not-determined | Genome-fragment | NA              | 0    | 0     |
| S7_k141_30074                                | 4599 Yes | NA | 2119 | 1  | 1              | Low-quality     | Genome-fragment | NA   | 1     |
| S2_k141_88196                                | 1176 No  | NA | 0    | 1  | Not-determined | Genome-fragment | NA              | 0    | 53.82 |
| S2_k141_191455                               | 1115 No  | NA | 0    | 0  | 1              | Not-determined  | Genome-fragment | NA   | 0     |
| S2_k141_88226                                | 1206 No  | NA | 0    | 0  | 0              | Not-determined  | Genome-fragment | NA   | 0     |
| S2_k141_211886                               | 1396 No  | NA | 0    | 0  | 1              | Not-determined  | Genome-fragment | NA   | 0     |
| S2_k141_128628                               | 1329 No  | NA | 0    | 0  | 0              | Not-determined  | Genome-fragment | NA   | 0     |
| S2_k141_67142                                | 1473 No  | NA | 0    | 0  | 1              | Not-determined  | Genome-fragment | NA   | 0     |
| S2_k141_128630                               | 3120 No  | NA | 0    | 0  | 1              | Not-determined  | Genome-fragment | NA   | 0     |
| S2_k141_139957                               | 2140 No  | NA | 0    | 0  | 1              | Not-determined  | Genome-fragment | NA   | 0     |
| S2_k141_67183                                | 1006 No  | NA | 0    | 0  | 0              | Not-determined  | Genome-fragment | NA   | 0     |
| S2_k141_242404                               | 1126 No  | NA | 0    | 0  | 1              | Not-determined  | Genome-fragment | NA   | 0     |
| S2_k141_171412                               | 1557 No  | NA | 0    | 0  | 0              | Not-determined  | Genome-fragment | NA   | 0     |
| S2_k141_160137                               | 2392 No  | NA | 0    | 0  | 1              | Not-determined  | Genome-fragment | NA   | 0     |
| S2_k141_119048                               | 1415 No  | NA | 0    | 0  | 1              | Not-determined  | Genome-fragment | NA   | 0     |
| S2_k141_232326                               | 1076 No  | NA | 0    | 0  | 0              | Not-determined  | Genome-fragment | NA   | 0     |
| S2_k141_221661                               | 3473 No  | NA | 0    | 0  | 1              | Not-determined  | Genome-fragment | NA   | 0     |
| S2_k141_48197                                | 3065 No  | NA | 0    | 0  | 0              | Not-determined  | Genome-fragment | NA   | 0     |
| S12-final-viral-combined_k141_296790  full   | 4599 No  | NA | 5    | 0  | 0              | Low-quality     | Genome-fragment | NA   | 9.33  |
| S2_k141_77655                                | 3754 No  | NA | 0    | 3  | Not-determined | Genome-fragment | NA              | 0    | 0     |
| S2_k141_15461                                | 6749 No  | NA | 0    | 7  | Not-determined | Genome-fragment | NA              | 0    | 0     |
| S2_k141_98782                                | 1236 No  | NA | 0    | 0  | 1              | Not-determined  | Genome-fragment | NA   | 0     |
| S2_k141_57272                                | 19076 No | NA | 0    | 6  | Not-determined | Genome-fragment | NA              | 0    | 0     |
| S2_k141_119111                               | 1353 No  | NA | 0    | 0  | 0              | Not-determined  | Genome-fragment | NA   | 0     |
| S2-final-viral-combined_k141_242004  102gene | 4600 No  | NA | 2    | 0  | Low-quality    | Genome-fragment | NA              | 1.65 | 0     |
| S2_k141_77669                                | 13118 No | NA | 0    | 6  | Not-determined | Genome-fragment | NA              | 0    | 0     |
| S2_k141_67223                                | 3835 No  | NA | 0    | 0  | 1              | Not-determined  | Genome-fragment | NA   | 0     |
| S2_k141_119140                               | 1072 No  | NA | 0    | 0  | 0              | Not-determined  | Genome-fragment | NA   | 0     |
| S2_k141_104400                               | 4600 No  | NA | 0    | 2  | Low-quality    | Genome-fragment | NA              | 2.89 | 0     |
| S2_k141_181801                               | 1050 No  | NA | 0    | 1  | Not-determined | Genome-fragment | NA              | 0    | 0     |
| S2_k141_140059                               | 1037 No  | NA | 0    | 0  | 0              | Not-determined  | Genome-fragment | NA   | 0     |
| S2_k141_15582                                | 1209 No  | NA | 0    | 0  | 0              | Not-determined  | Genome-fragment | NA   | 0     |
| S2_k141_98865                                | 1623 No  | NA | 0    | 1  | Not-determined | Genome-fragment | NA              | 0    | 0     |
| S11-final-viral-combined_k141_321918  full   | 4601 No  | NA | 0    | 0  | 1              | Low-quality     | Genome-fragment | NA   | 8.67  |
| S2_k141_242535                               | 2088 No  | NA | 0    | 0  | 1              | Not-determined  | Genome-fragment | NA   | 0     |
| S2_k141_47574                                | 4602 No  | NA | 0    | 1  | Low-quality    | Genome-fragment | NA              | 4.9  | 0     |
| S2_k141_140148                               | 3485 No  | NA | 0    | 0  | 1              | Not-determined  | Genome-fragment | NA   | 0     |
| S2_k141_15620                                | 1254 No  | NA | 0    | 0  | 1              | Not-determined  | Genome-fragment | NA   | 0     |
| S2_k141_191706                               | 1254 No  | NA | 0    | 0  | 0              | Not-determined  | Genome-fragment | NA   | 0     |
| S2_k141_150277                               | 4284 No  | NA | 0    | 1  | Not-determined | Genome-fragment | NA              | 0    | 0     |
| S2_k141_128717                               | 6578 No  | NA | 0    | 14 | Not-determined | Genome-fragment | NA              | 0    | 0     |
| S2_k141_119285                               | 3268 No  | NA | 0    | 0  | 1              | Not-determined  | Genome-fragment | NA   | 0     |
| S2_k141_88450                                | 1008 No  | NA | 0    | 0  | 0              | Not-determined  | Genome-fragment | NA   | 0     |
| S2_k141_57429                                | 5651 No  | NA | 0    | 2  | Not-determined | Genome-fragment | NA              | 0    | 0     |
| S2_k141_57431                                | 1119 No  | NA | 0    | 0  | 0              | Not-determined  | Genome-fragment | NA   | 0     |
| S11-final-viral-combined_k141_31777  full    | 4603 No  | NA | 1    | 0  | 0              | Low-quality     | Genome-fragment | NA   | 6.48  |
| S2_k141_15654                                | 1968 No  | NA | 0    | 0  | 1              | Not-determined  | Genome-fragment | NA   | 0     |
| S2_k141_242642                               | 1091 No  | NA | 0    | 0  | 1              | Not-determined  | Genome-fragment | NA   | 0     |
| S2_k141_191718                               | 2342 No  | NA | 0    | 0  | 0              | Not-determined  | Genome-fragment | NA   | 0     |
| S1-final-viral-combined_k141_22917  full     | 4603 No  | NA | 0    | 0  | 0              | Low-quality     | Genome-fragment | NA   | 5.59  |
| S2_k141_108526                               | 1608 No  | NA | 0    | 2  | Not-determined | Genome-fragment | NA              | 0    | 0     |
| S2_k141_98959                                | 1178 No  | NA | 0    | 0  | 0              | Not-determined  | Genome-fragment | NA   | 0     |
| S6-final-viral-combined_k141_37035  full     | 4603 No  | NA | 1    | 0  | 0              | Low-quality     | Genome-fragment | NA   | 12.27 |
| S2_k141_88560                                | 1890 No  | NA | 0    | 0  | 1              | Not-determined  | Genome-fragment | NA   | 0     |
| S2_k141_125250                               | 4603 No  | NA | 5    | 0  | 0              | Low-quality     | Genome-fragment | NA   | 9.86  |
| S2_k141_15703                                | 3176 No  | NA | 0    | 2  | Not-determined | Genome-fragment | NA              | 0    | 0     |
| S2_k141_108564                               | 3314 No  | NA | 0    | 2  | Not-determined | Genome-fragment | NA              | 0    | 0     |
| S2-final-viral-combined_k141_187162  full    | 4603 No  | NA | 5    | 0  | 0              | Low-quality     | Genome-fragment | NA   | 12.36 |
| S2_k141_88587                                | 3366 No  | NA | 0    | 2  | Not-determined | Genome-fragment | NA              | 0    | 0     |
| S2_k141_171711                               | 1298 No  | NA | 0    | 0  | 1              | Not-determined  | Genome-fragment | NA   | 0     |
| S2_k141_77998                                | 3519 No  | NA | 0    | 0  | 1              | Not-determined  | Genome-fragment | NA   | 0     |
| S3-final-viral-combined_k141_30267  full     | 4604 No  | NA | 0    | 0  | 0              | Low-quality     | Genome-fragment | NA   | 2.81  |
| S2_k141_242706                               | 4890 No  | NA | 0    | 0  | 0              | Not-determined  | Genome-fragment | NA   | 0     |
| S2_k141_221774                               | 1229 No  | NA | 0    | 0  | 0              | Not-determined  | Genome-fragment | NA   | 0     |
| S2_k141_221150                               | 1075 No  | NA | 0    | 0  | 1              | Not-determined  | Genome-fragment | NA   | 0     |
| S2_k141_221782                               | 1120 No  | NA | 0    | 0  | 0              | Not-determined  | Genome-fragment | NA   | 0     |
| S2_k141_221783                               | 5886 No  | NA | 0    | 14 | Not-determined | Genome-fragment | NA              | 0    | 0     |
| S7-final-viral-combined_k141_15534  full     | 4605 No  | NA | 4    | 0  | 0              | Low-quality     | Genome-fragment | NA   | 12.12 |
| S8-final-viral-combined_k141_131986  full    | 4605 No  | NA | 0    | 1  | Low-quality    | Genome-fragment | NA              | 2.99 | 0     |
| S2_k141_78033                                | 3512 No  | NA | 0    | 2  | Not-determined | Genome-fragment | NA              | 0    | 0     |
| S11-final-viral-combined_k141_268548  full   | 4606 No  | NA | 0    | 0  | 3              | Low-quality     | Genome-fragment | NA   | 1.28  |
| S2_k141_108646                               | 5099 No  | NA | 0    | 4  | Not-determined | Genome-fragment | NA              | 0    | 0     |
| S1_k141_75913                                | 4606 No  | NA | 0    | 2  | Low-quality    | Genome-fragment | NA              | 2.97 | 0     |
| S5_k141_185020                               | 4608 No  | NA | 6    | 0  | 0              | Low-quality     | Genome-fragment | NA   | 4.34  |
| S2_k141_108651                               | 1806 No  | NA | 0    | 0  | 0              | Not-determined  | Genome-fragment | NA   | 0     |
| S2_k141_155154                               | 1157 No  | NA | 0    | 0  | 1              | Not-determined  | Genome-fragment | NA   | 0     |
| S3_k141_80693                                | 4609 No  | NA | 3    | 0  | 0              | Low-quality     | Genome-fragment | NA   | 8.39  |
| S17_k141_59313                               | 4609 No  | NA | 0    | 0  | 3              | Low-quality     | Genome-fragment | NA   | 1.92  |
| S3_k141_71012                                | 4610 No  | NA | 0    | 0  | 1              | Low-quality     | Genome-fragment | NA   | 2.4   |
| S8-final-viral-combined_k141_48704  full     | 4610 No  | NA | 0    | 0  | 3              | Low-quality     | Genome-fragment | NA   | 1.31  |
| S2_k141_160334                               | 1409 No  | NA | 0    | 0  | 3              | Not-determined  | Genome-fragment | NA   | 8.8   |
| S1-final-viral-combined_k141_170041  full    | 4611 No  | NA | 3    | 0  | 0              | Low-quality     | Genome-fragment | NA   | 7.59  |
| S12-final-viral-combined_k141_381479  full   | 4611 No  | NA | 7    | 0  | 0              | Low-quality     | Genome-fragment | NA   | 0     |
| S2_k141_48584                                | 1993 No  | NA | 0    | 0  | 1              | Not-determined  | Genome-fragment | NA   | 0     |
| S2_k141_15880                                | 4854 No  | NA | 0    | 3  | Not-determined | Genome-fragment | NA              | 0    | 0     |
| S2_k141_151890                               | 1623 No  | NA | 0    | 0  | 0              | Not-determined  | Genome-fragment | NA   | 0     |
| S2_k141_201130                               | 1411 No  | NA | 0    | 0  | 0              | Not-determined  | Genome-fragment | NA   | 0     |
| S11_k141_239625                              | 4612 No  | NA | 0    | 0  | 1              | Low-quality     | Genome-fragment | NA   | 7.86  |
| S2_k141_99080                                | 2152 No  | NA | 0    | 0  | 0              | Not-determined  | Genome-fragment | NA   | 0     |
| S2_k141_99083                                | 3162 No  | NA | 0    | 3  | Not-determined | Genome-fragment | NA              | 0    | 0     |
| S2_k141_212182                               | 2040 No  | NA | 0    | 0  | 0              | Not-determined  | Genome-fragment | NA   | 0     |
| S1_k141_147400                               | 4612 No  | NA | 0    | 0  | 3              | Low-quality     | Genome-fragment | NA   | 1.22  |
| S2_k141_4703                                 | 1476 No  | NA | 0    | 0  | 0              | Not-determined  | Genome-fragment | NA   | 0     |
| S2_k141_108774                               | 3221 No  | NA | 0    | 0  | 0              | Not-determined  | Genome-fragment | NA   | 0     |
| S2_k141_128831                               | 86290 No | NA | 17   | 2  | Complete       | High-quality    | NA              | 100  | 0     |
| S2_k141_171973                               | 1256 No  | NA | 0    | 0  | 0              | Not-determined  | Genome-fragment | NA   | 0     |
| S2_k141_88778                                | 3824 No  | NA | 0    | 4  | Not-determined | Genome-fragment | NA              | 0    | 0     |
| S2_k141_182053                               | 1124 No  | NA | 0    | 0  | 0              | Not-determined  | Genome-fragment | NA   | 0     |
| S7-final-viral-combined_k141_119601  full    | 4612 No  | NA | 8    | 0  | 0              | Low-quality     | Genome-fragment | NA   | 11.01 |
| S2_k141_78296                                | 5086 No  | NA | 0    | 0  | 1              | Not-determined  | Genome-fragment | NA   | 0     |
| S2_k141_15960                                | 3389 No  | NA | 0    | 0  | 1              | Not-determined  | Genome-fragment | NA   | 0     |
| S2_k141_88831                                | 1443 No  | NA | 0    | 0  | 2              | Not-determined  | Genome-fragment | NA   | 0     |
| S2_k141_48737                                | 1235 No  | NA | 0    | 0  | 0              | Not-determined  | Genome-fragment | NA   | 0     |
| S2_k141_182116                               | 1223 No  | NA | 0    | 0  | 1              | Not-determined  | Genome-fragment | NA   | 0     |
| S2_k141_15982                                | 1065 No  | NA | 0    | 0  | 0              | Not-determined  | Genome-fragment | NA   | 0     |
| S2_k141_48750                                | 1103 No  | NA | 0    | 0  | 0              | Not-determined  | Genome-fragment | NA   | 0     |
| S2_k141_73133                                | 4612 No  | NA | 0    | 0  | 2              | Low-quality     | Genome-fragment | NA   | 0.4   |
| S2_k141_150620                               | 3495 No  | NA | 0    | 0  | 2              | Not-determined  | Genome-fragment | NA   | 8.78  |
| S11-final-viral-combined_k141_281679  full   | 4613 No  | NA | 2    | 0  | 0              | Low-quality     | Genome-fragment | NA   | 0     |
| S2_k141_88860                                | 1710 No  | NA | 0    | 0  | 1              | Not-determined  | Genome-fragment | NA   | 0     |
| S1_k141_171548                               | 4613 No  | NA | 0    | 0  | 3              | Low-quality     | Genome-fragment | NA   | 2.62  |
| S2_k141_151997                               | 1019 No  | NA | 0    | 0  | 1              | Not-determined  | Genome-fragment | NA   | 0     |
| S2_k141_201247                               | 1081 No  | NA | 0    | 0  | 0              | Not-determined  | Genome-fragment | NA   | 0     |
| S2_k141_140679                               | 1986 No  | NA | 0    | 0  | 1              | Not-determined  | Genome-fragment | NA   | 0     |
| S2_k141_128962                               | 97342 No | NA | 15   | 2  | Complete       | High-quality    | NA              | 100  | 0     |
| S2_k141_88965                                | 1283 No  | NA | 0    | 0  | 0              | Not-determined  | Genome-fragment | NA   | 0     |
| S2_k141_182244                               | 1110 No  | NA | 0    | 0  | 0              | Not-determined  | Genome-fragment | NA   | 0     |
| S5-final-viral-combined_k141_35672  full     | 4613 No  | NA | 1    | 0  | 0              | Low-quality     | Genome-fragment | NA   | 11.8  |
| S2_k141_150765                               | 1256 No  | NA | 0    | 0  | 0              | Not-determined  | Genome-fragment | NA   | 0     |
| S2_k141_172173                               | 1159 No  | NA | 0    | 0  | 0              | Not-determined  | Genome-fragment | NA   | 0     |
| S2_k141_140752                               | 1378 No  | NA | 0    | 0  | 1              | Not-determined  | Genome-fragment | NA   | 0     |
| S2_k141_160520                               | 1013 No  | NA | 0    | 0  | 0              | Not-determined  | Genome-fragment | NA   | 0     |
| S2_k141_108963                               | 1114 No  | NA | 0    | 0  | 2              | Not-determined  | Genome-fragment | NA   | 0     |
| S2_k141_49020                                | 1188 No  | NA | 0    | 0  | 2              | Not-determined  | Genome-fragment | NA   | 0     |
| S2_k141_192052                               | 5361 No  | NA | 0    | 0  | 2              | Not-determined  | Genome-fragment | NA   | 0     |
| S2_k141_212313                               | 1801 No  | NA | 0    | 0  | 4              | Not-determined  | Genome-fragment | NA   | 0     |
| S2_k141_192066                               | 1291 No  | NA | 0    | 0  | 1              | Not-determined  | Genome-fragment | NA   | 0     |
| S2_k141_129055                               | 1272 No  | NA | 0    | 0  | 0              | Not-determined  | Genome-fragment | NA   | 0     |
| S2_k141_212334                               | 1674 No  | NA | 0    | 0  | 0              | Not-determined  | Genome-fragment | NA   | 0     |
| S2_k141_108994                               | 1672 No  | NA | 0    | 0  | 3              | Not-determined  | Genome-fragment | NA   | 0     |
| S2_k141_160570                               | 6981 No  | NA | 0    | 0  | 0              | Not-determined  | Genome-fragment | NA   | 0     |
| S2_k141_172247                               | 1400 No  | NA | 0    | 0  | 1              | Not-determined  | Genome-fragment | NA   | 0     |
| S2_k141_37287                                | 1445 No  | NA | 0    | 0  | 0              | Not-determined  | Genome-fragment | NA   | 0     |
| S2_k141_201324                               | 1216 No  | NA | 0    | 0  | 1              | Not-determined  | Genome-fragment | NA   | 0     |
| S9_k141_53700                                | 4614 No  | NA | 0    | 0  | 3              | Low-quality     | Genome-fragment | NA   | 1.91  |
| S11-final-viral-combined_k141_154415  full   | 4615 No  | NA | 0    | 0  | 2              | Low-quality     | Genome-fragment | NA   | 1.45  |
| S2-final-viral-combined_k141_96727  full     | 4615 No  | NA | 1    | 0  | 0              | Low-quality     | Genome-fragment | NA   | 9.04  |
| S9_k141_23855                                | 4616 No  | NA | 0    | 0  | 0              | Low-quality     | Genome-fragment | NA   | 7.71  |
| S4-final-viral-combined_k141_14852  full     | 4616 No  | NA | 0    | 0  | 0              | Low-quality     | Genome-fragment | NA   | 4.49  |
| S2_k141_78523                                | 1723 No  | NA | 0    | 0  | 1              | Not-determined  | Genome-fragment | NA   | 0     |
| S9                                           |          |    |      |    |                |                 |                 |      |       |



|                                               |       |     |      |    |   |                |                 |    |       |
|-----------------------------------------------|-------|-----|------|----|---|----------------|-----------------|----|-------|
| S2_k141_49281                                 | 2093  | No  | NA   | 0  | 2 | Not-determined | Genome-fragment | NA | 0     |
| S2_k141_59489                                 | 3031  | No  | NA   | 0  | 7 | Not-determined | Genome-fragment | NA | 0     |
| S6-final-viral-combined_k141_104329[ full]    | 4620  | No  | NA   | 3  | 0 | Low-quality    | Genome-fragment | NA | 19.04 |
| S11-final-viral-combined_k141_220386[ full]   | 4621  | No  | NA   | 1  | 0 | Low-quality    | Genome-fragment | NA | 4.15  |
| S12-final-viral-combined_k141_357681[ full]   | 4621  | No  | NA   | 0  | 0 | Low-quality    | Genome-fragment | NA | 4.58  |
| S2_k141_99520                                 | 2271  | No  | NA   | 0  | 1 | Not-determined | Genome-fragment | NA | 0     |
| S2_k141_16269                                 | 4765  | No  | NA   | 0  | 2 | Not-determined | Genome-fragment | NA | 0     |
| S2_k141_212459                                | 2541  | No  | NA   | 0  | 1 | Not-determined | Genome-fragment | NA | 0     |
| S2_k141_243162                                | 3307  | No  | NA   | 0  | 1 | Not-determined | Genome-fragment | NA | 0     |
| S2_k141_222112                                | 3062  | No  | NA   | 0  | 3 | Not-determined | Genome-fragment | NA | 0     |
| S4_k141_75138                                 | 4621  | No  | NA   | 0  | 2 | Low-quality    | Genome-fragment | NA | 4.19  |
| S2_k141_243176                                | 1952  | No  | NA   | 0  | 1 | Not-determined | Genome-fragment | NA | 2.3   |
| S5-final-viral-combined_k141_147678[ full]    | 4622  | No  | NA   | 0  | 2 | Low-quality    | Genome-fragment | NA | 2.87  |
| S17-final-viral-combined_k141_235644[ full]   | 4622  | No  | NA   | 0  | 1 | Low-quality    | Genome-fragment | NA | 2.87  |
| S2_k141_222157                                | 1022  | No  | NA   | 0  | 1 | Not-determined | Genome-fragment | NA | 24.62 |
| S4-final-viral-combined_k141_89146[ full]     | 4622  | Yes | 3484 | 2  | 0 | Low-quality    | Genome-fragment | NA | 7.47  |
| S2_k141_212509                                | 1215  | No  | NA   | 0  | 1 | Not-determined | Genome-fragment | NA | 0     |
| S2_k141_222170                                | 1457  | No  | NA   | 0  | 1 | Not-determined | Genome-fragment | NA | 0     |
| S2_k141_25759                                 | 1112  | No  | NA   | 0  | 2 | Not-determined | Genome-fragment | NA | 0     |
| S1-final-viral-combined_k141_297422[ full]    | 4623  | No  | NA   | 0  | 1 | Low-quality    | Genome-fragment | NA | 5.67  |
| S2_k141_16373                                 | 1708  | No  | NA   | 0  | 1 | Not-determined | Genome-fragment | NA | 0     |
| S2_k141_292318                                | 1274  | No  | NA   | 0  | 1 | Not-determined | Genome-fragment | NA | 0     |
| S3-final-viral-combined_k141_33449[ full]     | 4623  | No  | NA   | 0  | 2 | Low-quality    | Genome-fragment | NA | 3.02  |
| S2_k141_160833                                | 1432  | No  | NA   | 0  | 1 | Not-determined | Genome-fragment | NA | 0     |
| S2_k141_58094                                 | 1581  | No  | NA   | 0  | 1 | Not-determined | Genome-fragment | NA | 0     |
| S9_k141_22108                                 | 4624  | No  | NA   | 3  | 0 | Low-quality    | Genome-fragment | NA | 7.34  |
| S11-final-viral-combined_k141_186698[ full]   | 4624  | No  | NA   | 3  | 0 | Low-quality    | Genome-fragment | NA | 13.29 |
| S8-final-viral-combined_k141_139866[ full]    | 4624  | No  | NA   | 0  | 0 | Low-quality    | Genome-fragment | NA | 7.66  |
| S2_k141_99092                                 | 3374  | No  | NA   | 0  | 2 | Not-determined | Genome-fragment | NA | 0     |
| S8-final-viral-combined_k141_13444[ full]     | 4624  | No  | NA   | 3  | 0 | Low-quality    | Genome-fragment | NA | 9.54  |
| S12-final-viral-combined_k141_195082[ full]   | 4625  | No  | NA   | 1  | 0 | Low-quality    | Genome-fragment | NA | 2.99  |
| S2_k141_220259                                | 1444  | No  | NA   | 0  | 2 | Not-determined | Genome-fragment | NA | 0     |
| S2_k141_192375                                | 1671  | No  | NA   | 0  | 1 | Not-determined | Genome-fragment | NA | 0     |
| S2-final-viral-combined_k141_11701[ full]     | 4626  | No  | NA   | 1  | 0 | Low-quality    | Genome-fragment | NA | 5.19  |
| S2_k141_49478                                 | 1399  | No  | NA   | 0  | 1 | Not-determined | Genome-fragment | NA | 0     |
| S2_k141_109412                                | 1318  | No  | NA   | 0  | 1 | Not-determined | Genome-fragment | NA | 0     |
| S2_k141_222236                                | 1255  | No  | NA   | 0  | 0 | Not-determined | Genome-fragment | NA | 0     |
| S2_k141_201703                                | 8873  | No  | NA   | 0  | 3 | Not-determined | Genome-fragment | NA | 0     |
| S1-final-viral-combined_k141_19953[ full]     | 4627  | No  | NA   | 0  | 1 | Low-quality    | Genome-fragment | NA | 1.53  |
| S2_k141_37517                                 | 1078  | No  | NA   | 0  | 1 | Not-determined | Genome-fragment | NA | 0     |
| S2_k141_222258                                | 2566  | No  | NA   | 0  | 1 | Not-determined | Genome-fragment | NA | 0     |
| S1-final-viral-combined_k141_13156[ full]     | 4627  | No  | NA   | 2  | 0 | Low-quality    | Genome-fragment | NA | 13.24 |
| S2_k141_129239                                | 1132  | No  | NA   | 0  | 0 | Not-determined | Genome-fragment | NA | 0     |
| S2_k141_192414                                | 1317  | No  | NA   | 0  | 1 | Not-determined | Genome-fragment | NA | 0     |
| S2_k141_49534                                 | 1284  | No  | NA   | 0  | 1 | Not-determined | Genome-fragment | NA | 0     |
| S2_k141_234485                                | 1182  | No  | 2500 | 1  | 0 | Not-determined | Genome-fragment | NA | 2.81  |
| S17-final-viral-combined_k141_17441[ full]    | 4627  | Yes |      | 1  | 0 | Low-quality    | Genome-fragment | NA | 45.97 |
| S2_k141_160948                                | 1015  | No  | NA   | 0  | 1 | Not-determined | Genome-fragment | NA | 0     |
| S1-final-viral-combined_k141_20378[ full]     | 4628  | No  | NA   | 8  | 0 | Low-quality    | Genome-fragment | NA | 10.57 |
| S2_k141_222299                                | 1176  | No  | NA   | 0  | 1 | Not-determined | Genome-fragment | NA | 0     |
| S2_k141_120322                                | 1175  | No  | NA   | 0  | 1 | Not-determined | Genome-fragment | NA | 0     |
| S2_k141_4954                                  | 1270  | No  | NA   | 0  | 1 | Not-determined | Genome-fragment | NA | 0     |
| S2_k141_141029                                | 1366  | No  | NA   | 0  | 1 | Not-determined | Genome-fragment | NA | 0     |
| S2_k141_49615                                 | 4441  | No  | NA   | 0  | 2 | Not-determined | Genome-fragment | NA | 0     |
| S17-k141_50917                                | 4628  | No  | NA   | 0  | 2 | Low-quality    | Genome-fragment | NA | 2.49  |
| S2_k141_234546                                | 1649  | No  | NA   | 0  | 0 | Not-determined | Genome-fragment | NA | 0     |
| S11-final-viral-combined_k141_30701[ full]    | 4629  | No  | NA   | 0  | 0 | Low-quality    | Genome-fragment | NA | 3.65  |
| S8-final-viral-combined_k141_22341[ full]     | 4629  | No  | NA   | 4  | 0 | Low-quality    | Genome-fragment | NA | 11.7  |
| S17-final-viral-combined_k141_190317[ H2gene] | 4630  | No  | NA   | 0  | 1 | Low-quality    | Genome-fragment | NA | 10.39 |
| S6_k141_92307                                 | 4630  | No  | NA   | 0  | 1 | Low-quality    | Genome-fragment | NA | 9.84  |
| S1-final-viral-combined_k141_208925[ full]    | 4631  | No  | NA   | 0  | 0 | Low-quality    | Genome-fragment | NA | 10.79 |
| S2_k141_192532                                | 1181  | No  | NA   | 0  | 2 | Not-determined | Genome-fragment | NA | 0     |
| S2_k141_78799                                 | 1202  | No  | NA   | 0  | 0 | Not-determined | Genome-fragment | NA | 0     |
| S2_k141_49625                                 | 1048  | No  | NA   | 0  | 1 | Not-determined | Genome-fragment | NA | 0     |
| S2_k141_173110                                | 3775  | No  | NA   | 0  | 2 | Not-determined | Genome-fragment | NA | 0     |
| S11-final-viral-combined_k141_310165[ full]   | 4632  | No  | NA   | 0  | 1 | Low-quality    | Genome-fragment | NA | 5.97  |
| S11-final-viral-combined_k141_137623[ full]   | 4632  | No  | NA   | 0  | 4 | Low-quality    | Genome-fragment | NA | 2.01  |
| S1_k141_152171                                | 4633  | No  | NA   | 0  | 0 | Low-quality    | Genome-fragment | NA | 10.09 |
| S2_k141_161080                                | 1509  | No  | NA   | 0  | 2 | Not-determined | Genome-fragment | NA | 0     |
| S2_k141_49653                                 | 1174  | No  | NA   | 0  | 1 | Not-determined | Genome-fragment | NA | 0     |
| S2_k141_182792                                | 1199  | No  | NA   | 0  | 1 | Not-determined | Genome-fragment | NA | 0     |
| S2_k141_234687                                | 2104  | No  | NA   | 0  | 2 | Not-determined | Genome-fragment | NA | 0     |
| S17-final-viral-combined_k141_106761[ full]   | 4633  | No  | NA   | 2  | 0 | Low-quality    | Genome-fragment | NA | 5.12  |
| S2_k141_182846                                | 2453  | No  | NA   | 0  | 1 | Not-determined | Genome-fragment | NA | 0     |
| S2_k141_5071                                  | 2933  | No  | NA   | 0  | 1 | Not-determined | Genome-fragment | NA | 0     |
| S1-final-viral-combined_k141_370168[ full]    | 4636  | Yes | 3592 | 4  | 1 | Low-quality    | Genome-fragment | NA | 5.47  |
| S5-final-viral-combined_k141_80536[ full]     | 4637  | No  | NA   | 0  | 0 | Low-quality    | Genome-fragment | NA | 10.6  |
| S2_k141_37736                                 | 1118  | No  | NA   | 0  | 1 | Not-determined | Genome-fragment | NA | 0     |
| S6_k141_62008                                 | 4637  | No  | NA   | 2  | 0 | Low-quality    | Genome-fragment | NA | 12.03 |
| S2_k141_68237                                 | 1502  | No  | NA   | 0  | 0 | Not-determined | Genome-fragment | NA | 0     |
| S2_k141_151508                                | 1662  | No  | NA   | 0  | 1 | Not-determined | Genome-fragment | NA | 0     |
| S2_k141_89740                                 | 1809  | No  | NA   | 0  | 1 | Not-determined | Genome-fragment | NA | 0     |
| S4-final-viral-combined_k141_115953[ full]    | 4638  | No  | NA   | 4  | 0 | Low-quality    | Genome-fragment | NA | 11.27 |
| S2_k141_161273                                | 1169  | No  | NA   | 0  | 0 | Not-determined | Genome-fragment | NA | 0     |
| S9_k141_8725                                  | 4639  | No  | NA   | 0  | 1 | Low-quality    | Genome-fragment | NA | 1.23  |
| S2_k141_105603                                | 1012  | No  | NA   | 0  | 1 | Not-determined | Genome-fragment | NA | 0     |
| S2_k141_16815                                 | 1000  | No  | NA   | 0  | 1 | Not-determined | Genome-fragment | NA | 0     |
| S2_k141_212932                                | 3640  | No  | NA   | 0  | 2 | Not-determined | Genome-fragment | NA | 0     |
| S2_k141_181951                                | 3677  | No  | NA   | 0  | 2 | Not-determined | Genome-fragment | NA | 0     |
| S2_k141_16086                                 | 1025  | No  | NA   | 0  | 0 | Not-determined | Genome-fragment | NA | 0     |
| S2_k141_78908                                 | 1575  | No  | NA   | 0  | 0 | Not-determined | Genome-fragment | NA | 0     |
| S11-final-viral-combined_k141_322998[ full]   | 4639  | No  | NA   | 1  | 0 | Low-quality    | Genome-fragment | NA | 10.03 |
| S2-final-viral-combined_k141_28491[ full]     | 4640  | No  | NA   | 2  | 0 | Low-quality    | Genome-fragment | NA | 11.33 |
| S2_k141_26098                                 | 1520  | No  | NA   | 0  | 0 | Not-determined | Genome-fragment | NA | 0     |
| S2_k141_49882                                 | 3933  | No  | NA   | 0  | 0 | Not-determined | Genome-fragment | NA | 0     |
| S9-final-viral-combined_k141_32350[ full]     | 4641  | No  | NA   | 0  | 0 | Low-quality    | Genome-fragment | NA | 9.08  |
| S2_k141_89804                                 | 3955  | No  | NA   | 0  | 0 | Not-determined | Genome-fragment | NA | 0     |
| S2_k141_49927                                 | 2609  | No  | NA   | 0  | 1 | Not-determined | Genome-fragment | NA | 0     |
| S2_k141_212974                                | 3050  | No  | NA   | 0  | 1 | Not-determined | Genome-fragment | NA | 0     |
| S2_k141_49944                                 | 1061  | No  | NA   | 0  | 0 | Not-determined | Genome-fragment | NA | 0     |
| S2_k141_192667                                | 26847 | No  | NA   | 16 | 2 | Medium-quality | Genome-fragment | NA | 71.79 |
| S2_k141_16881                                 | 364   | No  | NA   | 0  | 2 | Not-determined | Genome-fragment | NA | 0     |
| S2_k141_222562                                | 5273  | No  | NA   | 0  | 5 | Not-determined | Genome-fragment | NA | 0     |
| S2_k141_151783                                | 1500  | No  | NA   | 0  | 1 | Not-determined | Genome-fragment | NA | 0     |
| S2_k141_16908                                 | 1014  | No  | NA   | 0  | 0 | Not-determined | Genome-fragment | NA | 0     |
| S2_k141_192731                                | 1903  | No  | NA   | 0  | 0 | Not-determined | Genome-fragment | NA | 0     |
| S7-final-viral-combined_k141_241461[ full]    | 4641  | No  | NA   | 5  | 0 | Low-quality    | Genome-fragment | NA | 9.99  |
| S2_k141_222583                                | 5452  | No  | NA   | 0  | 4 | Not-determined | Genome-fragment | NA | 0     |
| S2_k141_37829                                 | 1672  | No  | NA   | 0  | 0 | Not-determined | Genome-fragment | NA | 0     |
| S17-final-viral-combined_k141_215578[ full]   | 4641  | No  | NA   | 0  | 2 | Low-quality    | Genome-fragment | NA | 5.28  |
| S7-final-viral-combined_k141_170044[ full]    | 4642  | No  | NA   | 4  | 0 | Low-quality    | Genome-fragment | NA | 10.18 |
| S2_k141_141275                                | 4640  | No  | NA   | 0  | 1 | Not-determined | Genome-fragment | NA | 0     |
| S2_k141_151836                                | 3526  | No  | NA   | 0  | 3 | Not-determined | Genome-fragment | NA | 0     |
| S17-k141_21344                                | 4642  | No  | NA   | 0  | 0 | Low-quality    | Genome-fragment | NA | 7.7   |
| S8-final-viral-combined_k141_247827[ full]    | 4643  | No  | NA   | 0  | 2 | Low-quality    | Genome-fragment | NA | 2.28  |
| S7-final-viral-combined_k141_1815[ full]      | 4644  | No  | NA   | 3  | 0 | Low-quality    | Genome-fragment | NA | 9.73  |
| S2_k141_141326                                | 1397  | No  | NA   | 0  | 1 | Not-determined | Genome-fragment | NA | 0     |
| S2_k141_202079                                | 1132  | No  | NA   | 0  | 0 | Not-determined | Genome-fragment | NA | 0     |
| S2_k141_89953                                 | 1073  | No  | NA   | 0  | 1 | Not-determined | Genome-fragment | NA | 0     |
| S2_k141_161472                                | 6053  | No  | NA   | 0  | 0 | Not-determined | Genome-fragment | NA | 0     |
| S11-final-viral-combined_k141_245984[ full]   | 4645  | Yes | 3119 | 2  | 1 | Low-quality    | Genome-fragment | NA | 7.93  |
| S2_k141_130729                                | 4469  | No  | NA   | 0  | 2 | Not-determined | Genome-fragment | NA | 32.85 |
| S2_k141_68385                                 | 2309  | No  | NA   | 0  | 1 | Not-determined | Genome-fragment | NA | 0     |
| S2_k141_100135                                | 1006  | No  | NA   | 0  | 1 | Not-determined | Genome-fragment | NA | 0     |
| S2_k141_39582                                 | 2802  | No  | NA   | 0  | 2 | Not-determined | Genome-fragment | NA | 0     |
| S1-final-viral-combined_k141_27085[ full]     | 4645  | No  | NA   | 4  | 0 | Low-quality    | Genome-fragment | NA | 7.69  |
| S2_k141_202118                                | 1331  | No  | NA   | 0  | 1 | Not-determined | Genome-fragment | NA | 0     |
| S2_k141_17027                                 | 4399  | No  | NA   | 0  | 0 | Not-determined | Genome-fragment | NA | 0     |
| S2_k141_17056                                 | 2012  | No  | NA   | 0  | 0 | Not-determined | Genome-fragment | NA | 0     |
| S2_k141_17057                                 | 1313  | No  | NA   | 0  | 2 | Not-determined | Genome-fragment | NA | 0     |
| S2_k141_58536                                 | 3141  | No  | NA   | 0  | 1 | Not-determined | Genome-fragment | NA | 0     |
| S2_k141_193811                                | 5158  | No  | NA   | 0  | 0 | Not-determined | Genome-fragment | NA | 0     |
| S4-final-viral-combined_k141_58159[ full]     | 4645  | No  | NA   | 0  | 3 | Low-quality    | Genome-fragment | NA | 2.23  |
| S2_k141_222726                                | 5522  | No  | NA   | 0  | 6 | Not-determined | Genome-fragment | NA | 0     |
| S2_k141_129723                                | 1370  | No  | NA   | 0  | 1 | Not-determined | Genome-fragment | NA | 0     |
| S2_k141_173606                                | 1772  | No  | NA   | 0  | 0 | Not-determined | Genome-fragment | NA | 0     |
| S5_k141_46441                                 | 4647  | No  | NA   | 0  | 1 | Low-quality    | Genome-fragment | NA | 5.69  |
| S2_k141_234985                                | 1920  | No  | NA   | 0  | 0 | Not-determined | Genome-fragment | NA | 0     |
| S2_k141_38034                                 | 1459  | No  | NA   | 0  | 0 | Not-determined | Genome-fragment | NA | 0     |
| S2_k141_5295                                  | 1114  | No  | NA   | 0  | 1 | Not-determined | Genome-fragment | NA | 0     |
| S8-final-viral-combined_k141_31418[ full]     | 4649  | No  | NA   | 3  | 0 | Low-quality    | Genome-fragment | NA | 12.77 |
| S2_k141_50182                                 | 1186  | No  | NA   | 0  | 0 | Not-determined | Genome-fragment | NA | 0     |
| S5-final-viral-combined_k141_149945[ full]    | 4651  | No  | NA   | 7  | 0 | Low-quality    | Genome-fragment | NA | 6.54  |
| S2_k141_243613                                | 1289  | No  | NA</ |    |   |                |                 |    |       |



|                                       |        |       |     |    |      |    |    |                |                 |       |       |
|---------------------------------------|--------|-------|-----|----|------|----|----|----------------|-----------------|-------|-------|
| S1-final-viral-combined_k141_3762801  | [full] | 4658  | Yes | NA | 3742 | 2  | 1  | Low-quality    | Genome-fragment | 6.36  | 19.67 |
| S2_k141_141626                        |        | 2853  | No  | NA | 0    | 0  | 0  | Not-determined | Genome-fragment | NA    | 0     |
| S2_k141_38349                         |        | 2469  | No  | NA | 0    | 0  | 0  | Not-determined | Genome-fragment | NA    | 0     |
| S2_k141_100497                        |        | 2803  | No  | NA | 0    | 0  | 0  | Not-determined | Genome-fragment | NA    | 0     |
| S2_k141_125360                        |        | 4658  | No  | NA | 3    | 0  | 0  | Low-quality    | Genome-fragment | 8.41  | 0     |
| S2_k141_141644                        |        | 1192  | No  | NA | 0    | 0  | 0  | Not-determined | Genome-fragment | NA    | 0     |
| S2_k141_193147                        |        | 2236  | No  | NA | 0    | 0  | 1  | Not-determined | Genome-fragment | NA    | 0     |
| S2_k141_30429                         |        | 1963  | No  | NA | 0    | 2  | 2  | Not-determined | Genome-fragment | NA    | 0     |
| S17-final-viral-combined_k141_2638691 | [full] | 4658  | No  | NA | 7    | 0  | 0  | Low-quality    | Genome-fragment | 11.53 | 0     |
| S2_k141_50515                         |        | 1261  | No  | NA | 0    | 1  | 1  | Not-determined | Genome-fragment | NA    | 0     |
| S6-final-viral-combined_k141_792441   | [full] | 4658  | No  | NA | 0    | 3  | 3  | Low-quality    | Genome-fragment | 2.15  | 0     |
| S2_k141_109893                        |        | 1676  | No  | NA | 0    | 2  | 2  | Not-determined | Genome-fragment | NA    | 0     |
| S2_k141_38402                         |        | 1318  | No  | NA | 0    | 0  | 0  | Not-determined | Genome-fragment | NA    | 0     |
| S2_k141_50541                         |        | 4065  | No  | NA | 0    | 1  | 1  | Not-determined | Genome-fragment | NA    | 0     |
| S2_k141_222935                        |        | 1350  | No  | NA | 0    | 0  | 0  | Not-determined | Genome-fragment | NA    | 0     |
| S2_k141_222956                        |        | 1368  | No  | NA | 0    | 1  | 1  | Not-determined | Genome-fragment | NA    | 0     |
| S2_k141_100520                        |        | 12823 | No  | NA | 0    | 1  | 1  | Not-determined | Genome-fragment | NA    | 0     |
| S2_k141_68959                         |        | 6912  | No  | NA | 0    | 2  | 2  | Not-determined | Genome-fragment | NA    | 0     |
| S12-final-viral-combined_k141_2331391 | [full] | 4659  | No  | NA | 1    | 0  | 0  | Low-quality    | Genome-fragment | 10.63 | 0     |
| S2_k141_141710                        |        | 1023  | No  | NA | 0    | 1  | 1  | Not-determined | Genome-fragment | NA    | 0     |
| S8_k141_124844                        |        | 4659  | No  | NA | 0    | 0  | 0  | Low-quality    | Genome-fragment | 7.7   | 0     |
| S2_k141_193217                        |        | 3206  | No  | NA | 0    | 0  | 0  | Not-determined | Genome-fragment | NA    | 0     |
| S1-final-viral-combined_k141_3278621  | [full] | 4660  | No  | NA | 0    | 4  | 4  | Low-quality    | Genome-fragment | 3.84  | 0     |
| S2_k141_109950                        |        | 8903  | No  | NA | 0    | 2  | 2  | Not-determined | Genome-fragment | NA    | 0     |
| S2_k141_58803                         |        | 1086  | No  | NA | 0    | 1  | 1  | Not-determined | Genome-fragment | NA    | 0     |
| S2_k141_232013                        |        | 1417  | No  | NA | 0    | 1  | 1  | Not-determined | Genome-fragment | NA    | 0     |
| S2_k141_50575                         |        | 1452  | No  | NA | 0    | 1  | 1  | Not-determined | Genome-fragment | NA    | 0     |
| S3-final-viral-combined_k141_355181   | [full] | 4660  | No  | NA | 0    | 4  | 4  | Low-quality    | Genome-fragment | 2.08  | 0     |
| S2_k141_26453                         |        | 1565  | No  | NA | 0    | 0  | 0  | Not-determined | Genome-fragment | NA    | 0     |
| S12-final-viral-combined_k141_3530611 | [full] | 4660  | No  | NA | 0    | 0  | 0  | Low-quality    | Genome-fragment | 4.16  | 0     |
| S2_k141_223057                        |        | 1569  | No  | NA | 0    | 1  | 1  | Not-determined | Genome-fragment | NA    | 0     |
| S2_k141_235413                        |        | 1230  | No  | NA | 0    | 0  | 0  | Not-determined | Genome-fragment | NA    | 0     |
| S2_k141_5561                          |        | 6157  | No  | NA | 0    | 2  | 2  | Not-determined | Genome-fragment | NA    | 0     |
| S2_k141_17410                         |        | 9246  | No  | NA | 0    | 2  | 2  | Not-determined | Genome-fragment | NA    | 0     |
| S12-final-viral-combined_k141_2403291 | [full] | 4660  | No  | NA | 1    | 0  | 0  | Low-quality    | Genome-fragment | 7.92  | 0     |
| S2_k141_235455                        |        | 1314  | No  | NA | 0    | 1  | 1  | Not-determined | Genome-fragment | NA    | 0     |
| S2_k141_193262                        |        | 1055  | No  | NA | 0    | 0  | 0  | Not-determined | Genome-fragment | NA    | 0     |
| S2_k141_30472                         |        | 1415  | No  | NA | 0    | 1  | 1  | Not-determined | Genome-fragment | NA    | 0     |
| S2_k141_17460                         |        | 1502  | No  | NA | 0    | 0  | 0  | Not-determined | Genome-fragment | NA    | 0     |
| S2_k141_183288                        |        | 1704  | No  | NA | 0    | 1  | 1  | Not-determined | Genome-fragment | NA    | 0     |
| S2_k141_58884                         |        | 3473  | No  | NA | 0    | 3  | 3  | Not-determined | Genome-fragment | NA    | 0     |
| S2_k141_123554                        |        | 1003  | No  | NA | 0    | 1  | 1  | Not-determined | Genome-fragment | NA    | 0     |
| S2_k141_174062                        |        | 1129  | No  | NA | 0    | 2  | 2  | Not-determined | Genome-fragment | NA    | 0     |
| S2_k141_243834                        |        | 6952  | No  | NA | 0    | 0  | 0  | Not-determined | Genome-fragment | NA    | 0     |
| S2_k141_243838                        |        | 1499  | No  | NA | 0    | 0  | 0  | Not-determined | Genome-fragment | NA    | 0     |
| S2_k141_50736                         |        | 1197  | No  | NA | 0    | 0  | 0  | Not-determined | Genome-fragment | NA    | 0     |
| S2_k141_130152                        |        | 1984  | No  | NA | 0    | 2  | 2  | Not-determined | Genome-fragment | NA    | 0     |
| S2_k141_121362                        |        | 1146  | No  | NA | 0    | 1  | 1  | Not-determined | Genome-fragment | NA    | 0     |
| S11_k141_214526                       |        | 4661  | No  | NA | 4    | 0  | 0  | Low-quality    | Genome-fragment | 11.75 | 0     |
| S2_k141_174105                        |        | 4585  | No  | NA | 0    | 0  | 0  | Not-determined | Genome-fragment | NA    | 0     |
| S2_k141_152420                        |        | 1403  | No  | NA | 0    | 1  | 1  | Not-determined | Genome-fragment | NA    | 0     |
| S2-final-viral-combined_k141_2131861  | [full] | 4661  | No  | NA | 1    | 0  | 0  | Low-quality    | Genome-fragment | 6.29  | 0     |
| S2_k141_69077                         |        | 3357  | No  | NA | 0    | 2  | 2  | Not-determined | Genome-fragment | NA    | 0     |
| S17-final-viral-combined_k141_489241  | [full] | 4662  | No  | NA | 1    | 0  | 0  | Low-quality    | Genome-fragment | 7.05  | 0     |
| S2_k141_183369                        |        | 1412  | No  | NA | 0    | 0  | 0  | Not-determined | Genome-fragment | NA    | 0     |
| S2_k141_5681                          |        | 3057  | No  | NA | 0    | 3  | 3  | Not-determined | Genome-fragment | NA    | 0     |
| S17-k141_154536                       |        | 4663  | No  | NA | 0    | 0  | 0  | Low-quality    | Genome-fragment | 3.24  | 0     |
| S2_k141_213613                        |        | 1003  | No  | NA | 0    | 0  | 0  | Not-determined | Genome-fragment | NA    | 0     |
| S2_k141_100944                        |        | 3043  | No  | NA | 0    | 1  | 1  | Not-determined | Genome-fragment | NA    | 0     |
| S2_k141_202695                        |        | 2856  | No  | NA | 0    | 2  | 2  | Not-determined | Genome-fragment | NA    | 0     |
| S2-final-viral-combined_k141_1165431  | [full] | 4663  | No  | NA | 0    | 0  | 0  | Low-quality    | Genome-fragment | 5.2   | 0     |
| S2_k141_43132                         |        | 4663  | No  | NA | 6    | 0  | 0  | Low-quality    | Genome-fragment | 6.46  | 0     |
| S2_k141_223215                        |        | 6115  | No  | NA | 0    | 2  | 2  | Not-determined | Genome-fragment | NA    | 0     |
| S2_k141_100900                        |        | 1393  | No  | NA | 0    | 2  | 2  | Not-determined | Genome-fragment | NA    | 0     |
| S2_k141_59069                         |        | 1000  | No  | NA | 0    | 1  | 1  | Not-determined | Genome-fragment | NA    | 0     |
| S12-final-viral-combined_k141_3863811 | [full] | 4664  | No  | NA | 1    | 0  | 0  | Low-quality    | Genome-fragment | 10.65 | 0     |
| S2_k141_17599                         |        | 3493  | No  | NA | 0    | 3  | 3  | Not-determined | Genome-fragment | NA    | 0     |
| S9-final-viral-combined_k141_1095031  | [full] | 4665  | No  | NA | 1    | 0  | 0  | Low-quality    | Genome-fragment | 11.88 | 0     |
| S2_k141_213712                        |        | 1147  | No  | NA | 0    | 1  | 1  | Not-determined | Genome-fragment | NA    | 0     |
| S11-final-viral-combined_k141_3137681 | [full] | 4665  | No  | NA | 0    | 2  | 2  | Low-quality    | Genome-fragment | 8.21  | 0     |
| S2_k141_152588                        |        | 1230  | No  | NA | 0    | 0  | 0  | Not-determined | Genome-fragment | NA    | 0     |
| S2_k141_121480                        |        | 3997  | No  | NA | 0    | 0  | 0  | Not-determined | Genome-fragment | NA    | 0     |
| S2_k141_193496                        |        | 1244  | No  | NA | 0    | 0  | 0  | Not-determined | Genome-fragment | NA    | 0     |
| S2_k141_244014                        |        | 1648  | No  | NA | 0    | 1  | 1  | Not-determined | Genome-fragment | NA    | 0     |
| S12-final-viral-combined_k141_175511  | [full] | 4665  | No  | NA | 0    | 1  | 1  | Low-quality    | Genome-fragment | 4.92  | 0     |
| S12_k141_293746                       |        | 4665  | No  | NA | 0    | 3  | 3  | Low-quality    | Genome-fragment | 1.05  | 0     |
| S2_k141_59094                         |        | 1162  | No  | NA | 0    | 1  | 1  | Not-determined | Genome-fragment | NA    | 0     |
| S2_k141_183315                        |        | 2742  | No  | NA | 0    | 2  | 2  | Not-determined | Genome-fragment | NA    | 0     |
| S2_k141_223342                        |        | 1515  | No  | NA | 0    | 1  | 1  | Not-determined | Genome-fragment | NA    | 0     |
| S2_k141_244065                        |        | 1589  | No  | NA | 0    | 1  | 1  | Not-determined | Genome-fragment | NA    | 0     |
| S2_k141_235755                        |        | 1800  | No  | NA | 0    | 1  | 1  | Not-determined | Genome-fragment | NA    | 0     |
| S2-final-viral-combined_k141_1310801  | [full] | 4665  | No  | NA | 0    | 1  | 1  | Low-quality    | Genome-fragment | 2.94  | 0     |
| S2_k141_59135                         |        | 1235  | No  | NA | 0    | 1  | 1  | Not-determined | Genome-fragment | NA    | 0     |
| S2_k141_244090                        |        | 3043  | No  | NA | 0    | 3  | 3  | Not-determined | Genome-fragment | NA    | 0     |
| S2_k141_161879                        |        | 1159  | No  | NA | 0    | 1  | 1  | Not-determined | Genome-fragment | NA    | 0     |
| S2_k141_223364                        |        | 1114  | No  | NA | 0    | 1  | 1  | Not-determined | Genome-fragment | NA    | 0     |
| S9-final-viral-combined_k141_791161   | [full] | 4666  | No  | NA | 4    | 0  | 0  | Low-quality    | Genome-fragment | 12.33 | 0     |
| S8-final-viral-combined_k141_1062021  | [full] | 4667  | No  | NA | 0    | 1  | 1  | Low-quality    | Genome-fragment | 4.35  | 0     |
| S1_k141_201522                        |        | 4668  | No  | NA | 3    | 0  | 0  | Low-quality    | Genome-fragment | 11.32 | 0     |
| S2_k141_183560                        |        | 1121  | No  | NA | 0    | 0  | 0  | Not-determined | Genome-fragment | NA    | 0     |
| S2_k141_69318                         |        | 1016  | No  | NA | 0    | 0  | 0  | Not-determined | Genome-fragment | NA    | 0     |
| S2_k141_121571                        |        | 4210  | No  | NA | 0    | 1  | 1  | Not-determined | Genome-fragment | NA    | 0     |
| S1-final-viral-combined_k141_3486821  | [full] | 4670  | No  | NA | 0    | 1  | 1  | Low-quality    | Genome-fragment | 1.44  | 0     |
| S2_k141_235886                        |        | 1177  | No  | NA | 0    | 1  | 1  | Not-determined | Genome-fragment | NA    | 0     |
| S2_k141_183617                        |        | 2638  | No  | NA | 0    | 1  | 1  | Not-determined | Genome-fragment | NA    | 0     |
| S2_k141_101091                        |        | 1488  | No  | NA | 0    | 1  | 1  | Not-determined | Genome-fragment | NA    | 0     |
| S5-final-viral-combined_k141_1527571  | [full] | 4670  | No  | NA | 1    | 0  | 0  | Low-quality    | Genome-fragment | 7.26  | 0     |
| S2_k141_69373                         |        | 2007  | No  | NA | 0    | 0  | 0  | Not-determined | Genome-fragment | NA    | 0     |
| S2_k141_101105                        |        | 1072  | No  | NA | 0    | 1  | 1  | Not-determined | Genome-fragment | NA    | 0     |
| S2_k141_59223                         |        | 1002  | No  | NA | 0    | 0  | 0  | Not-determined | Genome-fragment | NA    | 0     |
| S2_k141_51101                         |        | 3621  | No  | NA | 0    | 1  | 1  | Not-determined | Genome-fragment | NA    | 0     |
| S12-final-viral-combined_k141_1337641 | [full] | 4671  | No  | NA | 1    | 0  | 0  | Low-quality    | Genome-fragment | 2.65  | 0     |
| S2-final-viral-combined_k141_1988771  | [full] | 4671  | No  | NA | 0    | 2  | 2  | Low-quality    | Genome-fragment | 3.35  | 0     |
| S2_k141_235931                        |        | 3111  | No  | NA | 0    | 1  | 1  | Not-determined | Genome-fragment | NA    | 0     |
| S2_k141_51103                         |        | 59963 | No  | NA | 0    | 5  | 5  | Not-determined | Genome-fragment | NA    | 0     |
| S2_k141_235933                        |        | 5961  | No  | NA | 0    | 5  | 5  | Not-determined | Genome-fragment | NA    | 0     |
| S2_k141_235936                        |        | 1535  | No  | NA | 0    | 1  | 1  | Not-determined | Genome-fragment | NA    | 0     |
| S2_k141_161946                        |        | 1685  | No  | NA | 0    | 1  | 1  | Not-determined | Genome-fragment | NA    | 0     |
| S2_k141_38985                         |        | 1020  | No  | NA | 0    | 1  | 1  | Not-determined | Genome-fragment | NA    | 0     |
| S2_k141_90655                         |        | 1520  | No  | NA | 0    | 1  | 1  | Not-determined | Genome-fragment | NA    | 0     |
| S2_k141_51127                         |        | 1066  | No  | NA | 0    | 1  | 1  | Not-determined | Genome-fragment | NA    | 0     |
| S2_k141_152726                        |        | 1263  | No  | NA | 0    | 0  | 0  | Not-determined | Genome-fragment | NA    | 0     |
| S2_k141_130420                        |        | 1958  | No  | NA | 0    | 0  | 0  | Not-determined | Genome-fragment | NA    | 0     |
| S2_k141_183698                        |        | 1584  | No  | NA | 0    | 0  | 0  | Not-determined | Genome-fragment | NA    | 0     |
| S9-final-viral-combined_k141_723191   | [full] | 4672  | No  | NA | 5    | 0  | 0  | Low-quality    | Genome-fragment | 2.19  | 0     |
| S11-final-viral-combined_k141_824571  | [full] | 4673  | No  | NA | 0    | 3  | 3  | Low-quality    | Genome-fragment | 10.44 | 0     |
| S2_k141_223576                        |        | 4494  | No  | NA | 0    | 1  | 1  | Not-determined | Genome-fragment | NA    | 0     |
| S2_k141_161986                        |        | 40463 | No  | NA | 17   | 2  | 2  | High-quality   | High-quality    | 100   | 0     |
| S2_k141_17880                         |        | 3634  | No  | NA | 0    | 0  | 0  | Not-determined | Genome-fragment | NA    | 0     |
| S2_k141_223609                        |        | 1616  | No  | NA | 0    | 2  | 2  | Not-determined | Genome-fragment | NA    | 0     |
| S2_k141_244205                        |        | 2907  | No  | NA | 0    | 1  | 1  | Not-determined | Genome-fragment | NA    | 0     |
| S2_k141_244208                        |        | 1024  | No  | NA | 0    | 0  | 0  | Not-determined | Genome-fragment | NA    | 0     |
| S2_k141_130437                        |        | 53868 | No  | NA | 0    | 42 | 42 | Not-determined | Genome-fragment | NA    | 0     |
| S17-final-viral-combined_k141_2117011 | [full] | 4674  | No  | NA | 1    | 0  | 0  | Low-quality    | Genome-fragment | 11.36 | 0     |
| S7_k141_188944                        |        | 4675  | No  | NA | 0    | 1  | 1  | Low-quality    | Genome-fragment | 4.92  | 0     |
| S2_k141_110315                        |        | 2362  | No  | NA | 0    | 1  | 1  | Not-determined | Genome-fragment | NA    | 0     |
| S2_k141_51209                         |        | 1512  | No  | NA | 0    | 0  | 0  | Not-determined | Genome-fragment | NA    | 0     |
| S2_k141_101205                        |        | 1100  | No  | NA | 0    | 1  | 1  | Not-determined | Genome-fragment | NA    | 0     |
| S2_k141_214013                        |        | 2779  | No  | NA | 0    | 0  | 0  | Not-determined | Genome-fragment | NA    | 0     |
| S2_k141_51237                         |        | 1097  | No  | NA | 0    | 2  | 2  | Not-determined | Genome-         |       |       |



|                                           |       |     |    |      |   |                  |                 |    |       |       |
|-------------------------------------------|-------|-----|----|------|---|------------------|-----------------|----|-------|-------|
| S2_k141_101496                            | 1502  | No  | NA | 0    | 0 | Not-determined   | Genome-fragment | NA | 0     | 0     |
| S2_k141_184223                            | 1332  | No  | NA | 0    | 1 | Not-determined   | Genome-fragment | NA | 0     | 0     |
| S1-final-viral-combined_k141_103819 full  | 4689  | Yes | NA | 4061 | 1 | Low-quality      | Genome-fragment | NA | 10.4  | 13.39 |
| S3_k141_38912                             | 4689  | No  | NA | 0    | 0 | Low-quality      | Genome-fragment | NA | 0.4   | 0     |
| S7-final-viral-combined_k141_216661 full  | 4689  | No  | NA | 0    | 0 | Low-quality      | Genome-fragment | NA | 12.02 | 0     |
| S2_k141_162217                            | 1219  | No  | NA | 0    | 0 | Not-determined   | Genome-fragment | NA | 0     | 0     |
| S2_k141_39466                             | 1182  | No  | NA | 0    | 0 | Not-determined   | Genome-fragment | NA | 0     | 0     |
| S2-final-viral-combined_k141_13895 full   | 4690  | No  | NA | 4    | 0 | Low-quality      | Genome-fragment | NA | 10.78 | 0     |
| S2_k141_232892                            | 3604  | No  | NA | 0    | 0 | Not-determined   | Genome-fragment | NA | 0     | 0     |
| S2_k141_59676                             | 4258  | No  | NA | 0    | 0 | 1 Not-determined | Genome-fragment | NA | 0     | 0     |
| S2_k141_184310                            | 1560  | No  | NA | 0    | 0 | 1 Not-determined | Genome-fragment | NA | 0     | 0     |
| S2_k141_18265                             | 2623  | No  | NA | 0    | 0 | 2 Not-determined | Genome-fragment | NA | 0     | 0     |
| S7-final-viral-combined_k141_128227 full  | 4691  | No  | NA | 0    | 0 | 2 Low-quality    | Genome-fragment | NA | 9.92  | 0     |
| S11_k141_75740                            | 4692  | No  | NA | 0    | 0 | 0 Low-quality    | Genome-fragment | NA | 4.42  | 0     |
| S2_k141_184376                            | 1383  | No  | NA | 0    | 0 | 1 Not-determined | Genome-fragment | NA | 0     | 0     |
| S2_k141_233915                            | 1100  | No  | NA | 0    | 0 | 1 Not-determined | Genome-fragment | NA | 4.72  | 0     |
| S1-final-viral-combined_k141_241850 full  | 4692  | No  | NA | 0    | 0 | 0 Low-quality    | Genome-fragment | NA | 13.33 | 0     |
| S2_k141_91153                             | 4427  | No  | NA | 0    | 0 | 1 Not-determined | Genome-fragment | NA | 0     | 0     |
| S2_k141_80147                             | 1465  | No  | NA | 0    | 0 | 1 Not-determined | Genome-fragment | NA | 0     | 0     |
| S2_k141_174968                            | 2228  | No  | NA | 0    | 0 | 1 Not-determined | Genome-fragment | NA | 0     | 0     |
| S2_k141_110761                            | 7856  | No  | NA | 3900 | 3 | 0 Medium-quality | Genome-fragment | NA | 57.34 | 0     |
| S1_k141_224859                            | 4692  | Yes | NA | 2    | 1 | Low-quality      | Genome-fragment | NA | 4.74  | 16.88 |
| S2_k141_91173                             | 1118  | No  | NA | 0    | 0 | 1 Not-determined | Genome-fragment | NA | 0     | 0     |
| S2_k141_153351                            | 2355  | No  | NA | 0    | 0 | 0 Not-determined | Genome-fragment | NA | 0     | 0     |
| S2_k141_153361                            | 1610  | No  | NA | 0    | 0 | 0 Not-determined | Genome-fragment | NA | 0     | 0     |
| S2_k141_162136                            | 1049  | No  | NA | 0    | 0 | 0 Not-determined | Genome-fragment | NA | 0     | 0     |
| S2_k141_6305                              | 2204  | No  | NA | 0    | 0 | 2 Not-determined | Genome-fragment | NA | 0     | 0     |
| S2_k141_223960                            | 4224  | No  | NA | 0    | 0 | 1 Not-determined | Genome-fragment | NA | 0     | 0     |
| S2_k141_51618                             | 1118  | No  | NA | 0    | 0 | 0 Not-determined | Genome-fragment | NA | 0     | 0     |
| S2_k141_101705                            | 1204  | No  | NA | 0    | 0 | 0 Not-determined | Genome-fragment | NA | 0     | 0     |
| S2_k141_39667                             | 2815  | No  | NA | 0    | 0 | 1 Not-determined | Genome-fragment | NA | 0     | 0     |
| S2_k141_101717                            | 1414  | No  | NA | 0    | 0 | 1 Not-determined | Genome-fragment | NA | 0     | 0     |
| S2_k141_142682                            | 1058  | No  | NA | 0    | 0 | 1 Not-determined | Genome-fragment | NA | 0     | 0     |
| S2_k141_51641                             | 12563 | No  | NA | 0    | 0 | 8 Not-determined | Genome-fragment | NA | 0     | 0     |
| S2_k141_162410                            | 1452  | No  | NA | 0    | 0 | 1 Not-determined | Genome-fragment | NA | 0     | 0     |
| S8-final-viral-combined_k141_271786 full  | 4694  | No  | NA | 2    | 0 | 0 Low-quality    | Genome-fragment | NA | 9.02  | 0     |
| S2_k141_162413                            | 3312  | No  | NA | 0    | 0 | 3 Not-determined | Genome-fragment | NA | 0     | 0     |
| S2_k141_27086                             | 1019  | No  | NA | 0    | 0 | 1 Not-determined | Genome-fragment | NA | 0     | 0     |
| S2_k141_131004                            | 1114  | No  | NA | 0    | 0 | 0 Not-determined | Genome-fragment | NA | 0     | 0     |
| S2_k141_70115                             | 1515  | No  | NA | 0    | 0 | 0 Not-determined | Genome-fragment | NA | 0     | 0     |
| S2_k141_236528                            | 1608  | No  | NA | 0    | 0 | 0 Not-determined | Genome-fragment | NA | 0     | 0     |
| S2_k141_162428                            | 1128  | No  | NA | 0    | 0 | 0 Not-determined | Genome-fragment | NA | 0     | 0     |
| S2_k141_236548                            | 1552  | No  | NA | 0    | 0 | 0 Not-determined | Genome-fragment | NA | 0     | 0     |
| S17-final-viral-combined_k141_81815 full  | 4696  | No  | NA | 2    | 0 | 0 Low-quality    | Genome-fragment | NA | 8.7   | 0     |
| S2-final-viral-combined_k141_20776 full   | 3502  | No  | NA | 1    | 0 | 0 Low-quality    | Genome-fragment | NA | 5.33  | 0     |
| S2_k141_175101                            | 1017  | No  | NA | 0    | 0 | 1 Not-determined | Genome-fragment | NA | 0     | 0     |
| S2_k141_27141                             | 1718  | No  | NA | 0    | 0 | 0 Not-determined | Genome-fragment | NA | 0     | 0     |
| S2_k141_142738                            | 1129  | No  | NA | 0    | 0 | 0 Not-determined | Genome-fragment | NA | 0     | 0     |
| S2_k141_224071                            | 4463  | No  | NA | 0    | 0 | 1 Not-determined | Genome-fragment | NA | 0     | 0     |
| S2_k141_59901                             | 1375  | No  | NA | 0    | 0 | 0 Not-determined | Genome-fragment | NA | 0     | 0     |
| S2_k141_91357                             | 4265  | No  | NA | 0    | 0 | 0 Not-determined | Genome-fragment | NA | 0     | 0     |
| S2_k141_59928                             | 1167  | No  | NA | 0    | 0 | 1 Not-determined | Genome-fragment | NA | 0     | 0     |
| S2_k141_59930                             | 1506  | No  | NA | 0    | 0 | 1 Not-determined | Genome-fragment | NA | 0     | 0     |
| S2_k141_101832                            | 1157  | No  | NA | 0    | 0 | 0 Not-determined | Genome-fragment | NA | 0     | 0     |
| S2_k141_214488                            | 3502  | No  | NA | 0    | 0 | 3 Not-determined | Genome-fragment | NA | 0     | 0     |
| S8-final-viral-combined_k141_152341 full  | 4697  | No  | NA | 1    | 0 | 0 Low-quality    | Genome-fragment | NA | 9.9   | 0     |
| S2_k141_122375                            | 4097  | No  | NA | 0    | 0 | 5 Not-determined | Genome-fragment | NA | 0     | 0     |
| S2_k141_194578                            | 1036  | No  | NA | 0    | 0 | 1 Not-determined | Genome-fragment | NA | 0     | 0     |
| S2_k141_122383                            | 1223  | No  | NA | 0    | 0 | 0 Not-determined | Genome-fragment | NA | 0     | 0     |
| S2_k141_80433                             | 1015  | No  | NA | 0    | 0 | 3 Not-determined | Genome-fragment | NA | 0     | 0     |
| S11-final-viral-combined_k141_81386 full  | 4702  | No  | NA | 7    | 0 | 0 Low-quality    | Genome-fragment | NA | 10.32 | 0     |
| S8-final-viral-combined_k141_360770 full  | 4705  | No  | NA | 0    | 0 | 2 Low-quality    | Genome-fragment | NA | 4.72  | 0     |
| S8_k141_59074                             | 4705  | No  | NA | 0    | 0 | 4 Low-quality    | Genome-fragment | NA | 3.37  | 0     |
| S2_k141_60010                             | 1386  | No  | NA | 0    | 0 | 1 Not-determined | Genome-fragment | NA | 0     | 0     |
| S2_k141_27179                             | 3330  | No  | NA | 0    | 0 | 1 Not-determined | Genome-fragment | NA | 0     | 0     |
| S2_k141_101879                            | 1708  | No  | NA | 0    | 0 | 0 Not-determined | Genome-fragment | NA | 0     | 0     |
| S12-final-viral-combined_k141_136977 full | 4706  | No  | NA | 0    | 0 | 1 Low-quality    | Genome-fragment | NA | 10.08 | 0     |
| S2_k141_80470                             | 3970  | No  | NA | 0    | 0 | 3 Not-determined | Genome-fragment | NA | 0     | 0     |
| S2_k141_80495                             | 1857  | No  | NA | 0    | 0 | 0 Not-determined | Genome-fragment | NA | 0     | 0     |
| S12_k141_160530                           | 4706  | No  | NA | 3    | 0 | 0 Low-quality    | Genome-fragment | NA | 8.14  | 0     |
| S2_k141_60097                             | 1526  | No  | NA | 0    | 0 | 0 Not-determined | Genome-fragment | NA | 0     | 0     |
| S2_k141_203399                            | 3917  | No  | NA | 0    | 0 | 1 Not-determined | Genome-fragment | NA | 0     | 0     |
| S2_k141_6424                              | 73450 | No  | NA | 15   | 1 | Complete         | High-quality    | NA | 100   | 0     |
| S2_k141_60111                             | 1633  | No  | NA | 0    | 0 | 0 Not-determined | Genome-fragment | NA | 0     | 0     |
| S11-final-viral-combined_k141_186866 full | 4707  | No  | NA | 2    | 0 | 0 Low-quality    | Genome-fragment | NA | 2.28  | 0     |
| S2_k141_224218                            | 5821  | No  | NA | 0    | 0 | 2 Not-determined | Genome-fragment | NA | 0     | 0     |
| S2_k141_175362                            | 1078  | No  | NA | 0    | 0 | 1 Not-determined | Genome-fragment | NA | 0     | 0     |
| S2_k141_143101                            | 4585  | No  | NA | 0    | 0 | 0 Not-determined | Genome-fragment | NA | 0     | 0     |
| S2_k141_203467                            | 3500  | No  | NA | 0    | 0 | 3 Not-determined | Genome-fragment | NA | 0     | 0     |
| S2_k141_162589                            | 1356  | No  | NA | 0    | 0 | 3 Not-determined | Genome-fragment | NA | 0     | 0     |
| S2_k141_91596                             | 1509  | No  | NA | 0    | 0 | 2 Not-determined | Genome-fragment | NA | 0     | 0     |
| S8-final-viral-combined_k141_233682 full  | 4708  | No  | NA | 0    | 0 | 0 Low-quality    | Genome-fragment | NA | 9.59  | 0     |
| S2_k141_6486                              | 1979  | No  | NA | 0    | 0 | 1 Not-determined | Genome-fragment | NA | 0     | 0     |
| S2_k141_162613                            | 1096  | No  | NA | 0    | 0 | 0 Not-determined | Genome-fragment | NA | 0     | 0     |
| S11-final-viral-combined_k141_210713 full | 4710  | No  | NA | 0    | 0 | 0 Low-quality    | Genome-fragment | NA | 12.05 | 0     |
| S1-final-viral-combined_k141_344859 full  | 4710  | No  | NA | 0    | 0 | 3 Low-quality    | Genome-fragment | NA | 2.19  | 0     |
| S2_k141_224254                            | 1606  | No  | NA | 0    | 0 | 1 Not-determined | Genome-fragment | NA | 0     | 0     |
| S2_k141_224276                            | 6536  | No  | NA | 0    | 0 | 1 Not-determined | Genome-fragment | NA | 0     | 0     |
| S2_k141_101125                            | 2753  | No  | NA | 0    | 0 | 1 Not-determined | Genome-fragment | NA | 0     | 0     |
| S12_k141_320495                           | 4710  | No  | NA | 4    | 0 | 0 Low-quality    | Genome-fragment | NA | 10.38 | 0     |
| S2_k141_91800                             | 1267  | No  | NA | 0    | 0 | 0 Not-determined | Genome-fragment | NA | 0     | 0     |
| S2_k141_236430                            | 1718  | No  | NA | 0    | 0 | 0 Not-determined | Genome-fragment | NA | 0     | 0     |
| S1_k141_359287                            | 4711  | No  | NA | 7    | 0 | 0 Low-quality    | Genome-fragment | NA | 7.34  | 0     |
| S11-final-viral-combined_k141_223445 full | 4713  | No  | NA | 0    | 0 | 4 Low-quality    | Genome-fragment | NA | 3.93  | 0     |
| S2_k141_102174                            | 2281  | No  | NA | 0    | 0 | 1 Not-determined | Genome-fragment | NA | 0     | 0     |
| S12_k141_42830                            | 4713  | No  | NA | 0    | 0 | 2 Low-quality    | Genome-fragment | NA | 7.33  | 0     |
| S2_k141_40297                             | 3237  | No  | NA | 0    | 0 | 2 Not-determined | Genome-fragment | NA | 0     | 0     |
| S2_k141_6566                              | 1105  | No  | NA | 0    | 0 | 1 Not-determined | Genome-fragment | NA | 0     | 0     |
| S4_k141_13631                             | 4713  | No  | NA | 0    | 0 | 0 Low-quality    | Genome-fragment | NA | 4.66  | 0     |
| S2_k141_214867                            | 4089  | No  | NA | 0    | 0 | 1 Not-determined | Genome-fragment | NA | 0     | 0     |
| S2_k141_224360                            | 2230  | No  | NA | 0    | 0 | 1 Not-determined | Genome-fragment | NA | 0     | 0     |
| S2_k141_131258                            | 1298  | No  | NA | 0    | 0 | 1 Not-determined | Genome-fragment | NA | 0     | 0     |
| S2_k141_143178                            | 2520  | No  | NA | 0    | 0 | 1 Not-determined | Genome-fragment | NA | 0     | 0     |
| S8-final-viral-combined_k141_33370 full   | 4713  | No  | NA | 0    | 0 | 1 Low-quality    | Genome-fragment | NA | 2.64  | 0     |
| S2_k141_70630                             | 1219  | No  | NA | 0    | 0 | 0 Not-determined | Genome-fragment | NA | 0     | 0     |
| S12_k141_310105                           | 4714  | No  | NA | 0    | 0 | 1 Low-quality    | Genome-fragment | NA | 2.58  | 0     |
| S2_k141_111183                            | 2058  | No  | NA | 0    | 0 | 1 Not-determined | Genome-fragment | NA | 0     | 0     |
| S2_k141_60498                             | 1406  | No  | NA | 0    | 0 | 0 Not-determined | Genome-fragment | NA | 0     | 0     |
| S2_k141_214914                            | 1138  | No  | NA | 0    | 0 | 1 Not-determined | Genome-fragment | NA | 0     | 0     |
| S2_k141_236986                            | 1114  | No  | NA | 0    | 0 | 0 Not-determined | Genome-fragment | NA | 0     | 0     |
| S2_k141_122626                            | 1617  | No  | NA | 0    | 0 | 1 Not-determined | Genome-fragment | NA | 0     | 0     |
| S2_k141_60538                             | 1455  | No  | NA | 0    | 0 | 0 Not-determined | Genome-fragment | NA | 0     | 0     |
| S2_k141_214941                            | 3149  | No  | NA | 0    | 0 | 1 Not-determined | Genome-fragment | NA | 0     | 0     |
| S2_k141_91584                             | 2833  | No  | NA | 0    | 0 | 4 Not-determined | Genome-fragment | NA | 0     | 0     |
| S2_k141_162809                            | 3091  | No  | NA | 0    | 0 | 2 Not-determined | Genome-fragment | NA | 0     | 0     |
| S2_k141_162811                            | 2535  | No  | NA | 0    | 0 | 2 Not-determined | Genome-fragment | NA | 0     | 0     |
| S2_k141_143252                            | 6083  | No  | NA | 0    | 0 | 6 Not-determined | Genome-fragment | NA | 0     | 0     |
| S17-final-viral-combined_k141_107057 full | 4715  | No  | NA | 5    | 0 | 0 Low-quality    | Genome-fragment | NA | 12.68 | 0     |
| S9-final-viral-combined_k141_36480 full   | 4716  | No  | NA | 0    | 0 | 0 Low-quality    | Genome-fragment | NA | 3.61  | 0     |
| S2_k141_91595                             | 1242  | No  | NA | 0    | 0 | 0 Not-determined | Genome-fragment | NA | 0     | 0     |
| S2_k141_52009                             | 2219  | No  | NA | 0    | 0 | 2 Not-determined | Genome-fragment | NA | 0     | 0     |
| S2_k141_214987                            | 1167  | No  | NA | 0    | 0 | 1 Not-determined | Genome-fragment | NA | 0     | 0     |
| S2_k141_40386                             | 5271  | No  | NA | 0    | 0 | 0 Not-determined | Genome-fragment | NA | 0     | 0     |
| S1_k141_366623                            | 4717  | No  | NA | 0    | 0 | 0 Low-quality    | Genome-fragment | NA | 10.99 | 0     |
| S2_k141_237114                            | 1041  | No  | NA | 0    | 0 | 0 Not-determined | Genome-fragment | NA | 0     | 0     |
| S2_k141_244725                            | 4625  | No  | NA | 0    | 0 | 1 Not-determined | Genome-fragment | NA | 0     | 0     |
| S2_k141_175673                            | 1145  | No  | NA | 0    | 0 | 1 Not-determined | Genome-fragment | NA | 0     | 0     |
| S2_k141_92098                             | 2671  | No  | NA | 0    | 0 | 2 Not-determined | Genome-fragment | NA | 0     | 0     |
| S17-k141_103215                           | 4718  | No  | NA | 0    | 0 | 1 Low-quality    | Genome-fragment | NA | 2.51  | 0     |
| S2_k141_175689                            | 3877  | No  | NA | 0    | 0 | 3 Not-determined | Genome-fragment | NA | 0     | 0     |
| S2_k141_237167                            | 1337  | No  | NA | 0    | 0 | 1 Not-determined | Genome-fragment | NA | 0     | 0     |
| S2_k141_153620                            | 3101  | No  | NA | 0    | 0 | 2 Not-determined | Genome-fragment | NA | 0     | 0     |
| S2_k141_203702                            | 2650  | No  | NA | 0    | 0 | 1 Not-determined | Genome-fragment | NA | 0     | 0     |
| S9_k141_56251                             | 4719  | Yes | NA | 2724 | 2 | 1 Low-quality    | Genome-fragment | NA | 7.44  | 42.28 |
| S2_k141_92146                             | 1019  | No  | NA | 0    | 0 | 1 Not-determined | Genome-fragment | NA | 0     | 0</   |



|                                            |       |     |    |      |    |                |                 |       |       |
|--------------------------------------------|-------|-----|----|------|----|----------------|-----------------|-------|-------|
| S2_k141_81171                              | 3339  | No  | NA | 0    | 1  | Not-determined | Genome-fragment | NA    | 0     |
| S2_k141_224720                             | 1519  | No  | NA | 0    | 0  | Not-determined | Genome-fragment | NA    | 0     |
| S2_k141_111511                             | 1175  | No  | NA | 0    | 0  | Not-determined | Genome-fragment | NA    | 0     |
| S2_k141_102766                             | 3796  | No  | NA | 0    | 0  | Not-determined | Genome-fragment | NA    | 0     |
| S2_k141_153960                             | 1156  | No  | NA | 0    | 2  | Not-determined | Genome-fragment | NA    | 0     |
| S2_k141_237179                             | 1116  | No  | NA | 0    | 2  | Not-determined | Genome-fragment | NA    | 0     |
| S2_k141_81259                              | 1005  | No  | NA | 0    | 1  | Not-determined | Genome-fragment | NA    | 0     |
| S2_k141_19327                              | 1279  | No  | NA | 0    | 0  | Not-determined | Genome-fragment | NA    | 0     |
| S2_k141_111445                             | 1380  | No  | NA | 0    | 1  | Not-determined | Genome-fragment | NA    | 0     |
| S2_k141_92356                              | 1075  | No  | NA | 0    | 1  | Not-determined | Genome-fragment | NA    | 0     |
| S2_k141_6970                               | 1081  | No  | NA | 0    | 0  | Not-determined | Genome-fragment | NA    | 0     |
| S2_k141_154009                             | 1099  | No  | NA | 0    | 1  | Not-determined | Genome-fragment | NA    | 0     |
| S6_k141_9023                               | 4728  | No  | NA | 0    | 3  | Low-quality    | Genome-fragment | 9.92  | 0     |
| S2_k141_195373                             | 1276  | No  | NA | 0    | 0  | Not-determined | Genome-fragment | NA    | 0     |
| S2_k141_19388                              | 1021  | No  | NA | 0    | 1  | Not-determined | Genome-fragment | NA    | 0     |
| S2_k141_195382                             | 1323  | No  | NA | 0    | 1  | Not-determined | Genome-fragment | NA    | 0     |
| S2_k141_204076                             | 1182  | No  | NA | 0    | 1  | Not-determined | Genome-fragment | NA    | 0     |
| S2_k141_185272                             | 2118  | No  | NA | 0    | 2  | Not-determined | Genome-fragment | NA    | 0     |
| S2_k141_195404                             | 2250  | No  | NA | 0    | 2  | Not-determined | Genome-fragment | NA    | 0     |
| S2-final-viral-combined_k141_214718  full  | 4729  | No  | NA | 1    | 0  | Low-quality    | Genome-fragment | 34.14 | 0     |
| S2_k141_81357                              | 6760  | No  | NA | 0    | 14 | Not-determined | Genome-fragment | NA    | 0     |
| S2_k141_231684                             | 1021  | No  | NA | 0    | 1  | Not-determined | Genome-fragment | NA    | 0     |
| S2_k141_111660                             | 4702  | No  | NA | 0    | 3  | Not-determined | Genome-fragment | NA    | 0     |
| S17-final-viral-combined_k141_47862  full  | 4730  | No  | NA | 1    | 0  | Low-quality    | Genome-fragment | 12.45 | 0     |
| S2_k141_131727                             | 2360  | No  | NA | 0    | 2  | Not-determined | Genome-fragment | NA    | 0     |
| S2_k141_185332                             | 2259  | No  | NA | 0    | 1  | Not-determined | Genome-fragment | NA    | 0     |
| S2_k141_40848                              | 1108  | No  | NA | 0    | 1  | Not-determined | Genome-fragment | NA    | 0     |
| S12-final-viral-combined_k141_51867  full  | 4731  | No  | NA | 0    | 1  | Low-quality    | Genome-fragment | 7.14  | 0     |
| S2_k141_143775                             | 1703  | No  | NA | 0    | 2  | Not-determined | Genome-fragment | NA    | 0     |
| S2_k141_224945                             | 1108  | No  | NA | 0    | 1  | Not-determined | Genome-fragment | NA    | 0     |
| S3-final-viral-combined_k141_67400  full   | 4733  | No  | NA | 4    | 0  | Low-quality    | Genome-fragment | 12.7  | 0     |
| S7-final-viral-combined_k141_157362  full  | 4733  | No  | NA | 0    | 0  | Low-quality    | Genome-fragment | 10.9  | 0     |
| S2_k141_61220                              | 1921  | No  | NA | 0    | 1  | Not-determined | Genome-fragment | NA    | 0     |
| S2_k141_185419                             | 1126  | No  | NA | 0    | 0  | Not-determined | Genome-fragment | NA    | 0     |
| S2_k141_163289                             | 1013  | No  | NA | 0    | 1  | Not-determined | Genome-fragment | NA    | 0     |
| S4-final-viral-combined_k141_17865  full   | 4733  | No  | NA | 0    | 1  | Low-quality    | Genome-fragment | 9.3   | 0     |
| S2_k141_154123                             | 1335  | No  | NA | 0    | 1  | Not-determined | Genome-fragment | NA    | 0     |
| S6_k141_86121                              | 4733  | No  | NA | 0    | 0  | Low-quality    | Genome-fragment | 4.93  | 0     |
| S2_k141_215680                             | 6409  | No  | NA | 0    | 1  | Not-determined | Genome-fragment | NA    | 0     |
| S7-final-viral-combined_k141_135017  full  | 4734  | No  | NA | 0    | 5  | Low-quality    | Genome-fragment | 4.45  | 0     |
| S2_k141_237672                             | 3234  | No  | NA | 0    | 1  | Not-determined | Genome-fragment | NA    | 0     |
| S17-final-viral-combined_k141_201021  full | 4734  | No  | NA | 0    | 3  | Low-quality    | Genome-fragment | 5.64  | 0     |
| S2_k141_215681                             | 7559  | No  | NA | 0    | 6  | Not-determined | Genome-fragment | NA    | 0     |
| S12-final-viral-combined_k141_205758  full | 4734  | No  | NA | 0    | 2  | Low-quality    | Genome-fragment | 3.84  | 0     |
| S8-final-viral-combined_k141_129488  full  | 4734  | No  | NA | 3    | 0  | Low-quality    | Genome-fragment | 11.15 | 0     |
| S2_k141_185478                             | 1439  | No  | NA | 0    | 1  | Not-determined | Genome-fragment | NA    | 0     |
| S2_k141_224999                             | 1140  | No  | NA | 0    | 0  | Not-determined | Genome-fragment | NA    | 0     |
| S11_k141_282748                            | 4736  | No  | NA | 0    | 1  | Low-quality    | Genome-fragment | 4.46  | 0     |
| S2_k141_133197                             | 2142  | No  | NA | 0    | 2  | Not-determined | Genome-fragment | NA    | 0     |
| S2_k141_61314                              | 1429  | No  | NA | 0    | 1  | Not-determined | Genome-fragment | NA    | 0     |
| S2_k141_225025                             | 1461  | No  | NA | 0    | 0  | Not-determined | Genome-fragment | NA    | 0     |
| S2_k141_215660                             | 1464  | No  | NA | 0    | 1  | Not-determined | Genome-fragment | NA    | 0     |
| S2_k141_81533                              | 3752  | No  | NA | 0    | 1  | Not-determined | Genome-fragment | NA    | 0     |
| S2_k141_143916                             | 1063  | No  | NA | 0    | 1  | Not-determined | Genome-fragment | NA    | 0     |
| S2_k141_27913                              | 1109  | No  | NA | 0    | 1  | Not-determined | Genome-fragment | NA    | 0     |
| S2_k141_19540                              | 1948  | No  | NA | 0    | 1  | Not-determined | Genome-fragment | NA    | 0     |
| S2_k141_143934                             | 4435  | No  | NA | 0    | 1  | Not-determined | Genome-fragment | NA    | 0     |
| S2_k141_154268                             | 1669  | No  | NA | 0    | 1  | Not-determined | Genome-fragment | NA    | 0     |
| S2_k141_21490                              | 4085  | No  | NA | 0    | 2  | Not-determined | Genome-fragment | NA    | 0     |
| S2_k141_123246                             | 1320  | No  | NA | 0    | 1  | Not-determined | Genome-fragment | NA    | 0     |
| S2_k141_163387                             | 1071  | No  | NA | 0    | 1  | Not-determined | Genome-fragment | NA    | 0     |
| S1-final-viral-combined_k141_48374  full   | 4736  | Yes | NA | 3533 | 1  | Low-quality    | Genome-fragment | 25.4  | 23.4  |
| S2_k141_27981                              | 1015  | No  | NA | 0    | 1  | Not-determined | Genome-fragment | NA    | 0     |
| S17-final-viral-combined_k141_35394  full  | 4737  | No  | NA | 3    | 0  | Low-quality    | Genome-fragment | 7.14  | 0     |
| S9_k141_53164                              | 4738  | Yes | NA | 3650 | 1  | Low-quality    | Genome-fragment | 1.69  | 22.96 |
| S2_k141_144035                             | 1970  | No  | NA | 0    | 1  | Not-determined | Genome-fragment | NA    | 0     |
| S2_k141_154359                             | 1586  | No  | NA | 0    | 0  | Not-determined | Genome-fragment | NA    | 0     |
| S2_k141_131954                             | 1229  | No  | NA | 0    | 0  | Not-determined | Genome-fragment | NA    | 0     |
| S2_k141_144090                             | 1053  | No  | NA | 0    | 0  | Not-determined | Genome-fragment | NA    | 0     |
| S2_k141_41082                              | 1010  | No  | NA | 0    | 1  | Not-determined | Genome-fragment | NA    | 0     |
| S2_k141_144094                             | 1227  | No  | NA | 0    | 1  | Not-determined | Genome-fragment | NA    | 0     |
| S5-final-viral-combined_k141_7576  full    | 4738  | No  | NA | 4    | 0  | Low-quality    | Genome-fragment | 10.42 | 0     |
| S2_k141_28012                              | 1032  | No  | NA | 0    | 2  | Not-determined | Genome-fragment | NA    | 0     |
| S5_k141_127912                             | 4738  | No  | NA | 5    | 0  | Low-quality    | Genome-fragment | 10.45 | 0     |
| S2_k141_61430                              | 1015  | No  | NA | 0    | 0  | Not-determined | Genome-fragment | NA    | 0     |
| S2_k141_28027                              | 3670  | No  | NA | 0    | 0  | Not-determined | Genome-fragment | NA    | 0     |
| S2_k141_195914                             | 1048  | No  | NA | 0    | 1  | Not-determined | Genome-fragment | NA    | 0     |
| S2_k141_28037                              | 1587  | No  | NA | 0    | 0  | Not-determined | Genome-fragment | NA    | 0     |
| S2_k141_81762                              | 2053  | No  | NA | 0    | 1  | Not-determined | Genome-fragment | NA    | 0     |
| S2_k141_144135                             | 1132  | No  | NA | 0    | 2  | Not-determined | Genome-fragment | NA    | 0     |
| S2_k141_154429                             | 1528  | No  | NA | 0    | 0  | Not-determined | Genome-fragment | NA    | 0     |
| S17-final-viral-combined_k141_57715  full  | 4738  | No  | NA | 0    | 0  | Low-quality    | Genome-fragment | 13.1  | 0     |
| S2_k141_92670                              | 11256 | No  | NA | 0    | 2  | Not-determined | Genome-fragment | NA    | 0     |
| S2_k141_225237                             | 2450  | No  | NA | 0    | 0  | Not-determined | Genome-fragment | NA    | 0     |
| S2_k141_195950                             | 1218  | No  | NA | 0    | 0  | Not-determined | Genome-fragment | NA    | 0     |
| S2_k141_245232                             | 40791 | No  | NA | 29   | 0  | High-quality   | High-quality    | 90.66 | 0     |
| S2_k141_195975                             | 1167  | No  | NA | 0    | 0  | Not-determined | Genome-fragment | NA    | 0     |
| S2_k141_225273                             | 3569  | No  | NA | 0    | 0  | Not-determined | Genome-fragment | NA    | 0     |
| S12-final-viral-combined_k141_115942  full | 4738  | No  | NA | 5    | 0  | Low-quality    | Genome-fragment | 14.69 | 0     |
| S2_k141_245258                             | 2579  | No  | NA | 0    | 1  | Not-determined | Genome-fragment | NA    | 0     |
| S9-final-viral-combined_k141_12453  full   | 4739  | No  | NA | 0    | 0  | Low-quality    | Genome-fragment | 11.68 | 0     |
| S2_k141_111899                             | 5545  | No  | NA | 0    | 0  | Not-determined | Genome-fragment | NA    | 0     |
| S2_k141_92752                              | 1800  | No  | NA | 0    | 1  | Not-determined | Genome-fragment | NA    | 0     |
| S2_k141_169693                             | 4739  | No  | NA | 0    | 0  | Low-quality    | Genome-fragment | 7.37  | 0     |
| S2_k141_111919                             | 1056  | No  | NA | 0    | 0  | Not-determined | Genome-fragment | NA    | 0     |
| S1-final-viral-combined_k141_362577  full  | 4741  | No  | NA | 0    | 0  | Low-quality    | Genome-fragment | 13.13 | 0     |
| S2_k141_237929                             | 1097  | No  | NA | 0    | 2  | Not-determined | Genome-fragment | NA    | 0     |
| S2_k141_196108                             | 1089  | No  | NA | 0    | 0  | Not-determined | Genome-fragment | NA    | 0     |
| S2_k141_154338                             | 2494  | No  | NA | 0    | 0  | Not-determined | Genome-fragment | NA    | 0     |
| S2_k141_111963                             | 1056  | No  | NA | 0    | 0  | Not-determined | Genome-fragment | NA    | 0     |
| S2_k141_81891                              | 1435  | No  | NA | 0    | 0  | Not-determined | Genome-fragment | NA    | 0     |
| S2_k141_71699                              | 6710  | No  | NA | 0    | 1  | Not-determined | Genome-fragment | NA    | 0     |
| S2_k141_112021                             | 2286  | No  | NA | 0    | 2  | Not-determined | Genome-fragment | NA    | 0     |
| S2_k141_132099                             | 1261  | No  | NA | 0    | 0  | Not-determined | Genome-fragment | NA    | 0     |
| S2_k141_196200                             | 1059  | No  | NA | 0    | 1  | Not-determined | Genome-fragment | NA    | 0     |
| S2_k141_163678                             | 2533  | No  | NA | 0    | 1  | Not-determined | Genome-fragment | NA    | 0     |
| S2_k141_112041                             | 2034  | No  | NA | 0    | 0  | Not-determined | Genome-fragment | NA    | 0     |
| S2_k141_7377                               | 1849  | No  | NA | 0    | 0  | Not-determined | Genome-fragment | NA    | 0     |
| S2_k141_131128                             | 1273  | No  | NA | 0    | 1  | Not-determined | Genome-fragment | NA    | 0     |
| S2_k141_225416                             | 1127  | No  | NA | 0    | 1  | Not-determined | Genome-fragment | NA    | 0     |
| S2_k141_41293                              | 1314  | No  | NA | 0    | 0  | Not-determined | Genome-fragment | NA    | 0     |
| S2_k141_41301                              | 1135  | No  | NA | 0    | 1  | Not-determined | Genome-fragment | NA    | 0     |
| S2_k141_103216                             | 1838  | No  | NA | 0    | 1  | Not-determined | Genome-fragment | NA    | 0     |
| S2_k141_103218                             | 2698  | No  | NA | 0    | 1  | Not-determined | Genome-fragment | NA    | 0     |
| S17-final-viral-combined_k141_173913  full | 4741  | No  | NA | 1    | 0  | Low-quality    | Genome-fragment | 1.42  | 0     |
| S2_k141_132155                             | 9083  | No  | NA | 0    | 0  | Not-determined | Genome-fragment | NA    | 0     |
| S2_k141_245325                             | 2550  | No  | NA | 0    | 1  | Not-determined | Genome-fragment | NA    | 0     |
| S2_k141_7455                               | 1052  | No  | NA | 0    | 0  | Not-determined | Genome-fragment | NA    | 0     |
| S12-final-viral-combined_k141_66568  full  | 4745  | No  | NA | 0    | 3  | Low-quality    | Genome-fragment | 0.77  | 0     |
| S2_k141_123502                             | 1752  | No  | NA | 0    | 1  | Not-determined | Genome-fragment | NA    | 0     |
| S2_k141_19995                              | 1082  | No  | NA | 0    | 0  | Not-determined | Genome-fragment | NA    | 0     |
| S2_k141_7465                               | 2647  | No  | NA | 0    | 0  | Not-determined | Genome-fragment | NA    | 0     |
| S2_k141_61665                              | 3340  | No  | NA | 0    | 0  | Not-determined | Genome-fragment | NA    | 0     |
| S12-final-viral-combined_k141_256091  full | 4746  | No  | NA | 1    | 0  | Low-quality    | Genome-fragment | 11.37 | 0     |
| S2_k141_154746                             | 1474  | No  | NA | 0    | 1  | Not-determined | Genome-fragment | NA    | 0     |
| S7-final-viral-combined_k141_59031  full   | 4748  | No  | NA | 2    | 0  | Low-quality    | Genome-fragment | 10.95 | 0     |
| S2_k141_163750                             | 4388  | No  | NA | 0    | 0  | Not-determined | Genome-fragment | NA    | 0     |
| S2_k141_196272                             | 1922  | No  | NA | 0    | 0  | Not-determined | Genome-fragment | NA    | 0     |
| S5-final-viral-combined_k141_143528  full  | 4750  | No  | NA | 0    | 1  | Low-quality    | Genome-fragment | 10.75 | 0     |
| S2_k141_216162                             | 3791  | No  | NA | 0    | 1  | Not-determined | Genome-fragment | NA    | 0     |
| S2_k141_123589                             | 4446  | No  | NA | 0    | 1  | Not-determined | Genome-fragment | NA    | 0     |
| S2_k141_103322                             | 7315  | No  | NA | 0    | 1  | Not-determined | Genome-fragment | NA    | 0     |
| S2_k141_216168                             | 5214  | No  | NA | 0    | 1  | Not-determined | Genome-fragment | NA    | 0     |
| S2_k141_216214                             | 1872  | No  | NA | 0    | 2  | Not-determined | Genome-fragment | NA    | 0     |
| S2_k141_216224                             | 3536  | No  | NA | 0    | 0  | Not-determined | Genome-fragment | NA    | 0     |
| S2_k141_61819                              | 1294  | No  | NA | 0    | 0  | Not-determined | Genome-fragment | NA    | 0     |
| S2_k141_112184                             | 1457  | No  | NA | 0    | 1  | Not-determined | Genome-fragment | NA    | 0     |
| S2_k141_128589                             | 3290  | No  | NA | 0    | 0  | Not-determined | Genome-fragment | NA    | 0     |
| S2_k141_225606                             | 1342  | No  | NA | 0    | 0  | Not-determined | Genome-fragment | NA    | 0     |
| S2_k141_7664                               | 1785  | No  | NA | 0    | 2  | Not-determined | Genome-fragment | NA    | 0     |
| S2_k141_204594                             | 1963  | No  | NA | 0    | 1  | Not-determined | Genome-fragment | NA    | 0     |
| S2_k141_112329                             | 14130 | No  | NA | 0    | 1  | Not-determined | Genome-fragment | NA    | 0     |
| S2_k141_82314                              | 1754  | No  | NA | 0    | 0  | Not-determined | Genome-fragment | NA    | 0     |
| S7_k141_26306                              | 4751  | No  | NA | 1    | 0  | Low-quality    | Genome-fragment | 8.7   | 0     |
| S2_k141_721197                             | 28678 | No  | NA | 0    | 9  | Not-determined | Genome-fragment | NA    | 0     |
| S2_k141_231506                             | 4751  | No  | NA | 0    | 2  | Low-quality    | Genome-fragment | 0.41  | 0     |
| S2_k141_103482                             |       |     |    |      |    |                |                 |       |       |



|                                            |       |     |    |      |    |                |                 |    |       |
|--------------------------------------------|-------|-----|----|------|----|----------------|-----------------|----|-------|
| S2_k141_123935                             | 1124  | No  | NA | 0    | 0  | Not-determined | Genome-fragment | NA | 0     |
| S2_k141_242490                             | 1006  | No  | NA | 0    | 1  | Not-determined | Genome-fragment | NA | 0     |
| S12-final-viral-combined_k141_179916  full | 4758  | No  | NA | 0    | 0  | Low-quality    | Genome-fragment | NA | 10.97 |
| S2_k141_245654                             | 3330  | No  | NA | 0    | 3  | Not-determined | Genome-fragment | NA | 0     |
| S5-final-viral-combined_k141_167072  full  | 4759  | No  | NA | 3    | 0  | Low-quality    | Genome-fragment | NA | 5.33  |
| S2-final-viral-combined_k141_111384  full  | 4759  | No  | NA | 1    | 0  | Low-quality    | Genome-fragment | NA | 10.2  |
| S2_k141_28795                              | 1113  | No  | NA | 0    | 1  | Not-determined | Genome-fragment | NA | 0     |
| S2_k141_204922                             | 1298  | No  | NA | 0    | 0  | Not-determined | Genome-fragment | NA | 0     |
| S2_k141_245489                             | 1010  | No  | NA | 0    | 1  | Not-determined | Genome-fragment | NA | 0     |
| S8-final-viral-combined_k141_58563  full   | 4759  | No  | NA | 8    | 0  | Low-quality    | Genome-fragment | NA | 11.97 |
| S2_k141_132948                             | 3224  | No  | NA | 0    | 0  | Not-determined | Genome-fragment | NA | 0     |
| S2_k141_164123                             | 1051  | No  | NA | 0    | 0  | Not-determined | Genome-fragment | NA | 0     |
| S2_k141_204992                             | 1133  | No  | NA | 0    | 0  | Not-determined | Genome-fragment | NA | 0     |
| S11-final-viral-combined_k141_287373  full | 4760  | No  | NA | 3    | 0  | Low-quality    | Genome-fragment | NA | 7.15  |
| S4_k141_158890                             | 4761  | No  | NA | 1    | 0  | Low-quality    | Genome-fragment | NA | 5.31  |
| S7-final-viral-combined_k141_74289  full   | 4762  | No  | NA | 0    | 2  | Low-quality    | Genome-fragment | NA | 3.29  |
| S2_k141_155319                             | 1046  | No  | NA | 0    | 1  | Not-determined | Genome-fragment | NA | 0     |
| S2_k141_245712                             | 1258  | No  | NA | 0    | 1  | Not-determined | Genome-fragment | NA | 0     |
| S2_k141_196757                             | 1554  | No  | NA | 0    | 0  | Not-determined | Genome-fragment | NA | 0     |
| S2_k141_216678                             | 1005  | No  | NA | 0    | 0  | Not-determined | Genome-fragment | NA | 0     |
| S2_k141_144859                             | 3615  | No  | NA | 0    | 3  | Not-determined | Genome-fragment | NA | 0     |
| S2_k141_28931                              | 1017  | No  | NA | 0    | 0  | Not-determined | Genome-fragment | NA | 0     |
| S2_k141_186366                             | 1052  | No  | NA | 0    | 0  | Not-determined | Genome-fragment | NA | 0     |
| S17-k141_195181                            | 4762  | No  | NA | 0    | 2  | Low-quality    | Genome-fragment | NA | 2.13  |
| S2_k141_245760                             | 1313  | No  | NA | 0    | 1  | Not-determined | Genome-fragment | NA | 0     |
| S2_k141_186398                             | 3057  | No  | NA | 0    | 0  | Not-determined | Genome-fragment | NA | 0     |
| S11-final-viral-combined_k141_237108  full | 4764  | No  | NA | 1    | 0  | Low-quality    | Genome-fragment | NA | 11.72 |
| S2_k141_225599                             | 3538  | No  | NA | 0    | 2  | Not-determined | Genome-fragment | NA | 0     |
| S2_k141_1413                               | 4764  | No  | NA | 0    | 0  | Low-quality    | Genome-fragment | NA | 5.95  |
| S2_k141_225993                             | 1145  | No  | NA | 0    | 0  | Not-determined | Genome-fragment | NA | 0     |
| S2_k141_82635                              | 1007  | No  | NA | 0    | 1  | Not-determined | Genome-fragment | NA | 0     |
| S5-final-viral-combined_k141_208210  full  | 4765  | No  | NA | 0    | 1  | Low-quality    | Genome-fragment | NA | 5.74  |
| S2_k141_144919                             | 1403  | No  | NA | 0    | 0  | Not-determined | Genome-fragment | NA | 0     |
| S2_k141_216898                             | 3685  | No  | NA | 0    | 0  | Not-determined | Genome-fragment | NA | 0     |
| S2_k141_205111                             | 1016  | No  | NA | 0    | 0  | Not-determined | Genome-fragment | NA | 0     |
| S2_k141_205118                             | 2144  | No  | NA | 0    | 0  | Not-determined | Genome-fragment | NA | 0     |
| S2_k141_82685                              | 1576  | No  | NA | 0    | 3  | Not-determined | Genome-fragment | NA | 0     |
| S2_k141_164360                             | 3805  | No  | NA | 0    | 2  | Not-determined | Genome-fragment | NA | 0     |
| S12_k141_200705                            | 4765  | No  | NA | 0    | 1  | Low-quality    | Genome-fragment | NA | 12.13 |
| S2_k141_82717                              | 1042  | No  | NA | 0    | 1  | Not-determined | Genome-fragment | NA | 0     |
| S2_k141_20699                              | 4752  | No  | NA | 0    | 2  | Not-determined | Genome-fragment | NA | 0     |
| S2_k141_20705                              | 1014  | No  | NA | 0    | 2  | Not-determined | Genome-fragment | NA | 0     |
| S2_k141_245891                             | 1287  | No  | NA | 0    | 1  | Not-determined | Genome-fragment | NA | 0     |
| S2_k141_133007                             | 1421  | No  | NA | 0    | 0  | Not-determined | Genome-fragment | NA | 0     |
| S2_k141_82795                              | 1590  | No  | NA | 0    | 2  | Not-determined | Genome-fragment | NA | 0     |
| S11-final-viral-combined_k141_197439  full | 4766  | No  | NA | 0    | 2  | Low-quality    | Genome-fragment | NA | 6.8   |
| S17-final-viral-combined_k141_219979  full | 4766  | No  | NA | 0    | 0  | Low-quality    | Genome-fragment | NA | 11.05 |
| S2_k141_226206                             | 1007  | No  | NA | 0    | 0  | Not-determined | Genome-fragment | NA | 0     |
| S1_k141_234112                             | 4767  | Yes | NA | 1    | 1  | Low-quality    | Genome-fragment | NA | 6.56  |
| S2_k141_205354                             | 2135  | No  | NA | 0    | 2  | Not-determined | Genome-fragment | NA | 0     |
| S2_k141_29130                              | 1050  | No  | NA | 0    | 1  | Not-determined | Genome-fragment | NA | 0     |
| S8-final-viral-combined_k141_5214  full    | 4768  | No  | NA | 0    | 2  | Low-quality    | Genome-fragment | NA | 11.03 |
| S2_k141_7842                               | 2006  | No  | NA | 0    | 0  | Not-determined | Genome-fragment | NA | 0     |
| S2_k141_217127                             | 1122  | No  | NA | 0    | 1  | Not-determined | Genome-fragment | NA | 0     |
| S2_k141_133211                             | 1862  | No  | NA | 0    | 0  | Not-determined | Genome-fragment | NA | 0     |
| S2_k141_133118                             | 1001  | No  | NA | 0    | 1  | Not-determined | Genome-fragment | NA | 0     |
| S5-final-viral-combined_k141_130729  full  | 4769  | No  | NA | 2    | 0  | Low-quality    | Genome-fragment | NA | 6.54  |
| S2_k141_246052                             | 2159  | No  | NA | 0    | 1  | Not-determined | Genome-fragment | NA | 0     |
| S7-final-viral-combined_k141_14729  full   | 4770  | No  | NA | 1    | 0  | Low-quality    | Genome-fragment | NA | 1.94  |
| S2_k141_246059                             | 1561  | No  | NA | 0    | 2  | Not-determined | Genome-fragment | NA | 0     |
| S2_k141_7889                               | 2166  | No  | NA | 0    | 0  | Not-determined | Genome-fragment | NA | 0     |
| S2_k141_236428                             | 1802  | No  | NA | 0    | 1  | Not-determined | Genome-fragment | NA | 0     |
| S2_k141_7910                               | 1107  | No  | NA | 0    | 0  | Not-determined | Genome-fragment | NA | 0     |
| S2_k141_112997                             | 1277  | No  | NA | 0    | 0  | Not-determined | Genome-fragment | NA | 0     |
| S2_k141_132340                             | 5306  | No  | NA | 10   | 0  | Not-determined | Genome-fragment | NA | 0     |
| S2_k141_226501                             | 3128  | No  | NA | 0    | 2  | Not-determined | Genome-fragment | NA | 0     |
| S2_k141_133361                             | 1470  | No  | NA | 0    | 0  | Not-determined | Genome-fragment | NA | 0     |
| S2_k141_164753                             | 1173  | No  | NA | 0    | 1  | Not-determined | Genome-fragment | NA | 0     |
| S2_k141_246108                             | 1182  | No  | NA | 0    | 0  | Not-determined | Genome-fragment | NA | 0     |
| S2_k141_29282                              | 3520  | No  | NA | 0    | 3  | Not-determined | Genome-fragment | NA | 0     |
| S2_k141_226531                             | 2797  | No  | NA | 0    | 2  | Not-determined | Genome-fragment | NA | 0     |
| S2_k141_217264                             | 2056  | No  | NA | 1    | 1  | Not-determined | Genome-fragment | NA | 0     |
| S5_k141_137119                             | 4771  | No  | NA | 1    | 0  | Low-quality    | Genome-fragment | NA | 5.57  |
| S2_k141_164797                             | 1157  | No  | NA | 0    | 0  | Not-determined | Genome-fragment | NA | 0     |
| S2_k141_113175                             | 1245  | No  | NA | 0    | 0  | Not-determined | Genome-fragment | NA | 0     |
| S2_k141_7949                               | 1332  | No  | NA | 0    | 0  | Not-determined | Genome-fragment | NA | 0     |
| S11-final-viral-combined_k141_268487  full | 4773  | No  | NA | 0    | 0  | Low-quality    | Genome-fragment | NA | 9.35  |
| S2_k141_113213                             | 1323  | No  | NA | 0    | 1  | Not-determined | Genome-fragment | NA | 0     |
| S2_k141_217356                             | 1811  | No  | NA | 0    | 0  | Not-determined | Genome-fragment | NA | 0     |
| S2_k141_29343                              | 4772  | No  | NA | 0    | 0  | Not-determined | Genome-fragment | NA | 0     |
| S4_k141_132741                             | 4773  | No  | NA | 2    | 0  | Low-quality    | Genome-fragment | NA | 16.13 |
| S2_k141_29444                              | 3310  | No  | NA | 0    | 7  | Not-determined | Genome-fragment | NA | 0     |
| S2_k141_165030                             | 1938  | No  | NA | 0    | 0  | Not-determined | Genome-fragment | NA | 0     |
| S2_k141_165069                             | 1691  | No  | NA | 0    | 1  | Not-determined | Genome-fragment | NA | 0     |
| S11-final-viral-combined_k141_289593  full | 4774  | No  | NA | 2    | 0  | Low-quality    | Genome-fragment | NA | 11.48 |
| S2_k141_29514                              | 1074  | No  | NA | 0    | 1  | Not-determined | Genome-fragment | NA | 0     |
| S2_k141_246296                             | 54120 | No  | NA | 14   | 0  | Medium-quality | Genome-fragment | NA | 67.31 |
| S2_k141_8163                               | 1358  | No  | NA | 0    | 3  | Not-determined | Genome-fragment | NA | 0     |
| S2_k141_217451                             | 1562  | No  | NA | 0    | 0  | Not-determined | Genome-fragment | NA | 0     |
| S11-final-viral-combined_k141_288176  full | 4775  | No  | NA | 4    | 0  | Low-quality    | Genome-fragment | NA | 6.37  |
| S4-final-viral-combined_k141_36170  full   | 4775  | No  | NA | 2    | 0  | Low-quality    | Genome-fragment | NA | 8.36  |
| S2_k141_8201                               | 1542  | No  | NA | 0    | 1  | Not-determined | Genome-fragment | NA | 0     |
| S2_k141_8220                               | 1098  | No  | NA | 0    | 0  | Not-determined | Genome-fragment | NA | 0     |
| S2_k141_165230                             | 4502  | No  | NA | 0    | 2  | Not-determined | Genome-fragment | NA | 0     |
| S7-final-viral-combined_k141_27986  full   | 4780  | No  | NA | 5    | 0  | Low-quality    | Genome-fragment | NA | 11.23 |
| S2_k141_226985                             | 1869  | No  | NA | 0    | 1  | Not-determined | Genome-fragment | NA | 0     |
| S2_k141_165298                             | 1308  | No  | NA | 0    | 0  | Not-determined | Genome-fragment | NA | 0     |
| S2_k141_227050                             | 2452  | No  | NA | 0    | 1  | Not-determined | Genome-fragment | NA | 0     |
| S12-final-viral-combined_k141_126943  full | 4780  | No  | NA | 2    | 0  | Low-quality    | Genome-fragment | NA | 7.84  |
| S2_k141_165372                             | 5044  | No  | NA | 0    | 1  | Not-determined | Genome-fragment | NA | 0     |
| S9-final-viral-combined_k141_46927  full   | 4781  | No  | NA | 0    | 2  | Low-quality    | Genome-fragment | NA | 1.5   |
| S2_k141_29759                              | 4100  | No  | NA | 0    | 0  | Not-determined | Genome-fragment | NA | 0     |
| S2_k141_133725                             | 1329  | No  | NA | 0    | 1  | Not-determined | Genome-fragment | NA | 0     |
| S2_k141_227206                             | 1131  | No  | NA | 0    | 0  | Not-determined | Genome-fragment | NA | 0     |
| S2_k141_227246                             | 2744  | No  | NA | 0    | 4  | Not-determined | Genome-fragment | NA | 0     |
| S2_k141_227250                             | 2295  | No  | NA | 0    | 6  | Not-determined | Genome-fragment | NA | 0     |
| S2_k141_133750                             | 2348  | No  | NA | 0    | 0  | Not-determined | Genome-fragment | NA | 0     |
| S2_k141_165558                             | 1118  | No  | NA | 0    | 0  | Not-determined | Genome-fragment | NA | 0     |
| S2_k141_206127                             | 8078  | No  | NA | 0    | 3  | Not-determined | Genome-fragment | NA | 0     |
| S2_k141_206175                             | 1162  | No  | NA | 0    | 1  | Not-determined | Genome-fragment | NA | 0     |
| S2_k141_246768                             | 4515  | No  | NA | 0    | 4  | Not-determined | Genome-fragment | NA | 0     |
| S2_k141_133984                             | 2315  | No  | NA | 0    | 1  | Not-determined | Genome-fragment | NA | 0     |
| S3_k141_51664                              | 4782  | Yes | NA | 1335 | 1  | Low-quality    | Genome-fragment | NA | 1.75  |
| S2_k141_8542                               | 25932 | No  | NA | 0    | 12 | Not-determined | Genome-fragment | NA | 0     |
| S2_k141_165625                             | 1106  | No  | NA | 0    | 0  | Not-determined | Genome-fragment | NA | 0     |
| S4-final-viral-combined_k141_5543  full    | 4782  | No  | NA | 2    | 0  | Low-quality    | Genome-fragment | NA | 10.26 |
| S5-final-viral-combined_k141_168816  full  | 4783  | No  | NA | 1    | 0  | Low-quality    | Genome-fragment | NA | 13.2  |
| S2_k141_246886                             | 2194  | No  | NA | 0    | 0  | Not-determined | Genome-fragment | NA | 0     |
| S2_k141_113836                             | 1582  | No  | NA | 0    | 0  | Not-determined | Genome-fragment | NA | 0     |
| S12-final-viral-combined_k141_224500  full | 4783  | No  | NA | 0    | 3  | Low-quality    | Genome-fragment | NA | 4.82  |
| S11-final-viral-combined_k141_138981  full | 4784  | No  | NA | 4    | 0  | Low-quality    | Genome-fragment | NA | 12.02 |
| S11_k141_224566                            | 4784  | No  | NA | 5    | 0  | Low-quality    | Genome-fragment | NA | 5.92  |
| S2_k141_246926                             | 1083  | No  | NA | 0    | 0  | Not-determined | Genome-fragment | NA | 0     |
| S2_k141_246944                             | 3077  | No  | NA | 0    | 2  | Not-determined | Genome-fragment | NA | 0     |
| S2_k141_246951                             | 1071  | No  | NA | 0    | 1  | Not-determined | Genome-fragment | NA | 0     |
| S2_k141_227557                             | 1786  | No  | NA | 0    | 1  | Not-determined | Genome-fragment | NA | 0     |
| S2_k141_206494                             | 1323  | No  | NA | 0    | 1  | Not-determined | Genome-fragment | NA | 0     |
| S2_k141_246995                             | 1119  | No  | NA | 0    | 0  | Not-determined | Genome-fragment | NA | 0     |
| S2_k141_246997                             | 1476  | No  | NA | 0    | 0  | Not-determined | Genome-fragment | NA | 0     |
| S2_k141_227593                             | 1762  | No  | NA | 0    | 1  | Not-determined | Genome-fragment | NA | 0     |
| S8_k141_118190                             | 4785  | No  | NA | 2    | 0  | Low-quality    | Genome-fragment | NA | 3.59  |
| S2_k141_227722                             | 1475  | No  | NA | 0    | 1  | Not-determined | Genome-fragment | NA | 0     |
| S5-final-viral-combined_k141_76500  full   | 4786  | No  | NA | 0    | 0  | Low-quality    | Genome-fragment | NA | 8.02  |
| S12-final-viral-combined_k141_312775  full | 4787  | No  | NA | 0    | 2  | Low-quality    | Genome-fragment | NA | 5.21  |
| S2_k141_30593                              | 1201  | No  | NA | 0    | 0  | Not-determined | Genome-fragment | NA | 0     |
| S2_k141_134555                             | 1079  | No  | NA | 0    | 1  | Not-determined | Genome-fragment | NA | 0     |
| S6-final-viral-combined_k141_130059  full  | 4789  | No  | NA | 0    | 3  | Low-quality    | Genome-fragment | NA | 2.96  |
| S4-final-viral-combined_k141_94671  full   | 4792  | Yes | NA | 4159 | 1  | Low-quality    | Genome-fragment | NA | 11.21 |
| S2_k141_134619                             | 1754  | No  | NA | 0    | 0  | Not-determined | Genome-fragment | NA | 0     |
| S2_k141_247145                             | 1390  | No  | NA | 0    | 0  | Not-determined | Genome-fragment | NA | 0     |
| S2_k141_206776                             | 2055  | No  | NA | 0    | 0  | Not-determined | Genome-fragment | NA | 0     |
| S1-final-viral-combined_k141_284183  full  | 4793  | No  | NA | 0    | 0  | Low-quality    | Genome-fragment | NA | 12.1  |
| S2_k141_206791                             | 1074  | No  | NA | 0    | 0  | Not-determined | Genome-fragment | NA | 0     |
| S17-final-viral-combined_k141_71697  full  | 4793  | No  | NA | 0    | 4  | Low-quality    | Genome-fragment | NA | 1.52  |
| S2_k141_247269                             | 1161  | No  | NA | 0    | 0  | Not-determined | Genome-fragment | NA | 0     |
| S                                          |       |     |    |      |    |                |                 |    |       |



|                                      |       |     |      |    |                |                 |                 |                 |       |       |   |
|--------------------------------------|-------|-----|------|----|----------------|-----------------|-----------------|-----------------|-------|-------|---|
| S2_k141_248232                       | 2336  | No  | NA   | 0  | 0              | 0               | Not-determined  | Genome-fragment | NA    | 0     | 0 |
| S2_k141_248252                       | 2859  | No  | NA   | 0  | 0              | 0               | Not-determined  | Genome-fragment | NA    | 0     | 0 |
| S2_k141_248315                       | 64248 | No  | NA   | 29 | 0              | 0               | Complete        | High-quality    | NA    | 100   | 0 |
| S2_k141_9780                         | 1000  | No  | NA   | 0  | 1              | Not-determined  | Genome-fragment | NA              | 0     | 0     | 0 |
| S2_k141_248324                       | 48927 | No  | NA   | 24 | 1              | Complete        | High-quality    | NA              | 100   | 0     | 0 |
| S2_k141_248327                       | 9825  | No  | NA   | 0  | 1              | Medium-quality  | Genome-fragment | NA              | 76.23 | 0     | 0 |
| S5_k141_199703                       | 4805  | No  | NA   | 2  | 0              | Low-quality     | Genome-fragment | NA              | 9.97  | 0     | 0 |
| S2_k141_9831                         | 1444  | No  | NA   | 0  | 1              | Not-determined  | Genome-fragment | NA              | 0     | 0     | 0 |
| S2_k141_248423                       | 1029  | No  | NA   | 0  | 1              | Not-determined  | Genome-fragment | NA              | 0     | 0     | 0 |
| S2_k141_9935                         | 3582  | No  | NA   | 0  | 2              | Not-determined  | Genome-fragment | NA              | 0     | 0     | 0 |
| S2_k141_10035                        | 2008  | No  | NA   | 0  | 5              | Not-determined  | Genome-fragment | NA              | 0     | 0     | 0 |
| S2_k141_10083                        | 1216  | No  | NA   | 0  | 0              | Not-determined  | Genome-fragment | NA              | 0     | 0     | 0 |
| S2_k141_10202                        | 1172  | No  | NA   | 0  | 0              | Not-determined  | Genome-fragment | NA              | 0     | 0     | 0 |
| S2_k141_10214                        | 1862  | No  | NA   | 0  | 0              | Not-determined  | Genome-fragment | NA              | 0     | 0     | 0 |
| S2_k141_10260                        | 1067  | No  | NA   | 0  | 0              | Not-determined  | Genome-fragment | NA              | 0     | 0     | 0 |
| S4-final-viral-combined_k141_143935  | 9979  | No  | NA   | 0  | 3              | Not-determined  | Genome-fragment | NA              | 0     | 0     | 0 |
| S4-final-viral-combined_k141_26994   | 6762  | No  | NA   | 0  | 5              | Not-determined  | Genome-fragment | NA              | 0     | 0     | 0 |
| S4-final-viral-combined_k141_139314  | 2019  | No  | NA   | 0  | 1              | Not-determined  | Genome-fragment | NA              | 0     | 0     | 0 |
| S8-final-viral-combined_k141_385091  | 4805  | No  | NA   | 0  | 0              | Low-quality     | Genome-fragment | NA              | 11.29 | 0     | 0 |
| S1-final-viral-combined_k141_233346  | 4806  | No  | NA   | 0  | 2              | Low-quality     | Genome-fragment | NA              | 2.7   | 0     | 0 |
| S4-final-viral-combined_k141_146307  | 1673  | No  | NA   | 0  | 2              | Not-determined  | Genome-fragment | NA              | 1.54  | 0     | 0 |
| S17-k141_126337                      | 4807  | No  | NA   | 0  | 2              | Low-quality     | Genome-fragment | NA              | 5.84  | 0     | 0 |
| S2-final-viral-combined_k141_185685  | 4808  | No  | NA   | 0  | 1              | Low-quality     | Genome-fragment | NA              | 4.12  | 0     | 0 |
| S2_k141_26218                        | 4808  | No  | NA   | 0  | 1              | Not-determined  | Genome-fragment | NA              | 0     | 0     | 0 |
| S4-final-viral-combined_k141_000089  | 2910  | No  | NA   | 0  | 1              | Not-determined  | Genome-fragment | NA              | 0     | 0     | 0 |
| S4-final-viral-combined_k141_1045271 | 2774  | No  | NA   | 0  | 3              | Not-determined  | Genome-fragment | NA              | 0     | 0     | 0 |
| S4-final-viral-combined_k141_34883   | 2645  | No  | NA   | 0  | 0              | Not-determined  | Genome-fragment | NA              | 0     | 0     | 0 |
| S4-final-viral-combined_k141_20951   | 2901  | No  | NA   | 0  | 0              | Not-determined  | Genome-fragment | NA              | 0     | 0     | 0 |
| S4-final-viral-combined_k141_69721   | 3162  | No  | NA   | 0  | 1              | Not-determined  | Genome-fragment | NA              | 0     | 0     | 0 |
| S4-final-viral-combined_k141_20958   | 3664  | No  | NA   | 0  | 1              | Not-determined  | Genome-fragment | NA              | 2.41  | 0     | 0 |
| S4-final-viral-combined_k141_91041   | 4808  | No  | NA   | 0  | 2              | Low-quality     | Genome-fragment | NA              | 0     | 0     | 0 |
| S4-final-viral-combined_k141_418391  | 2007  | No  | NA   | 0  | 1              | Not-determined  | Genome-fragment | NA              | 0     | 0     | 0 |
| S4-final-viral-combined_k141_118451  | 4635  | No  | NA   | 0  | 3              | Not-determined  | Genome-fragment | NA              | 0     | 0     | 0 |
| S1_k141_362208                       | 4810  | Yes | 2662 | 1  | 1              | Low-quality     | Genome-fragment | NA              | 1.59  | 44.66 | 0 |
| S8-final-viral-combined_k141_155031  | 4810  | No  | NA   | 1  | 0              | Low-quality     | Genome-fragment | NA              | 7.69  | 0     | 0 |
| S4-final-viral-combined_k141_153111  | 1720  | No  | NA   | 0  | 0              | Not-determined  | Genome-fragment | NA              | 0     | 0     | 0 |
| S4-final-viral-combined_k141_125428  | 1921  | No  | NA   | 0  | 2              | Not-determined  | Genome-fragment | NA              | 0     | 0     | 0 |
| S4-final-viral-combined_k141_139388  | 1314  | No  | NA   | 0  | 1              | Not-determined  | Genome-fragment | NA              | 0     | 0     | 0 |
| S17-final-viral-combined_k141_66239  | 4812  | No  | NA   | 0  | 3              | Low-quality     | Genome-fragment | NA              | 1.89  | 0     | 0 |
| S4-final-viral-combined_k141_153320  | 1395  | No  | NA   | 0  | 3              | Not-determined  | Genome-fragment | NA              | 0     | 0     | 0 |
| S4-final-viral-combined_k141_132459  | 1657  | No  | NA   | 0  | 1              | Not-determined  | Genome-fragment | NA              | 7.98  | 0     | 0 |
| S17-k141_160283                      | 4813  | No  | NA   | 0  | 2              | Low-quality     | Genome-fragment | NA              | 0     | 0     | 0 |
| S4-final-viral-combined_k141_41872   | 1900  | No  | NA   | 0  | 1              | Not-determined  | Genome-fragment | NA              | 0     | 0     | 0 |
| S4-final-viral-combined_k141_62813   | 2785  | No  | NA   | 0  | 2              | Not-determined  | Genome-fragment | NA              | 0     | 0     | 0 |
| S4-final-viral-combined_k141_125490  | 2364  | No  | NA   | 0  | 2              | Not-determined  | Genome-fragment | NA              | 0     | 0     | 0 |
| S4-final-viral-combined_k141_160297  | 1862  | No  | NA   | 0  | 2              | Not-determined  | Genome-fragment | NA              | 0     | 0     | 0 |
| S8_k141_270743                       | 4813  | No  | NA   | 0  | 0              | Low-quality     | Genome-fragment | NA              | 3.69  | 0     | 0 |
| S4-final-viral-combined_k141_152     | 1267  | No  | NA   | 0  | 0              | Not-determined  | Genome-fragment | NA              | 0     | 0     | 0 |
| S4-final-viral-combined_k141_907041  | 6176  | No  | NA   | 0  | 2              | Not-determined  | Genome-fragment | NA              | 0     | 0     | 0 |
| S7-final-viral-combined_k141_12381   | 4816  | No  | NA   | 5  | 0              | Low-quality     | Genome-fragment | NA              | 11.83 | 0     | 0 |
| S4-final-viral-combined_k141_146354  | 4469  | No  | NA   | 0  | 3              | Not-determined  | Genome-fragment | NA              | 10.94 | 0     | 0 |
| S17-final-viral-combined_k141_99399  | 4816  | No  | NA   | 0  | 2              | Low-quality     | Genome-fragment | NA              | 0     | 0     | 0 |
| S4-final-viral-combined_k141_175     | 1202  | No  | NA   | 0  | 0              | Not-determined  | Genome-fragment | NA              | 0     | 0     | 0 |
| S4-final-viral-combined_k141_21036   | 2028  | No  | NA   | 0  | 1              | Not-determined  | Genome-fragment | NA              | 0     | 0     | 0 |
| S4-final-viral-combined_k141_27969   | 1566  | No  | NA   | 3  | 0              | Low-quality     | Genome-fragment | NA              | 10.13 | 0     | 0 |
| S9_k141_56691                        | 4819  | No  | NA   | 0  | 1              | Not-determined  | Genome-fragment | NA              | 0     | 0     | 0 |
| S4-final-viral-combined_k141_14054   | 1064  | No  | NA   | 0  | 1              | Not-determined  | Genome-fragment | NA              | 0     | 0     | 0 |
| S4-final-viral-combined_k141_16787   | 2150  | No  | NA   | 0  | 1              | Not-determined  | Genome-fragment | NA              | 0     | 0     | 0 |
| S4-final-viral-combined_k141_62800   | 14210 | No  | NA   | 12 | Not-determined | Genome-fragment | NA              | 0               | 0     | 0     |   |
| S4-final-viral-combined_k141_76791   | 4752  | No  | NA   | 0  | 2              | Not-determined  | Genome-fragment | NA              | 11.01 | 0     | 0 |
| S1-final-viral-combined_k141_215676  | 4819  | No  | NA   | 0  | 0              | Low-quality     | Genome-fragment | NA              | 0     | 0     | 0 |
| S4-final-viral-combined_k141_7062    | 1293  | No  | NA   | 0  | 0              | Not-determined  | Genome-fragment | NA              | 5.02  | 0     | 0 |
| S2_k141_2546                         | 4819  | No  | NA   | 1  | 0              | Low-quality     | Genome-fragment | NA              | 0     | 0     | 0 |
| S4-final-viral-combined_k141_55806   | 1577  | No  | NA   | 0  | 0              | Not-determined  | Genome-fragment | NA              | 0.96  | 62.28 | 0 |
| S17-final-viral-combined_k141_249456 | 4821  | Yes | 1818 | 1  | 1              | Low-quality     | Genome-fragment | NA              | 3.31  | 0     | 0 |
| S17-final-viral-combined_k141_106398 | 4822  | No  | NA   | 0  | 1              | Low-quality     | Genome-fragment | NA              | 0     | 0     | 0 |
| S4-final-viral-combined_k141_160361  | 5132  | No  | NA   | 0  | 2              | Not-determined  | Genome-fragment | NA              | 0     | 0     | 0 |
| S4-final-viral-combined_k141_125363  | 3989  | No  | NA   | 0  | 1              | Not-determined  | Genome-fragment | NA              | 81.86 | 45.02 | 0 |
| S4-final-viral-combined_k141_11851   | 6931  | Yes | 3812 | 20 | 25             | Medium-quality  | Genome-fragment | NA              | 3.45  | 0     | 0 |
| S8-final-viral-combined_k141_114046  | 4822  | No  | NA   | 0  | 1              | Low-quality     | Genome-fragment | NA              | 7.99  | 0     | 0 |
| S4-final-viral-combined_k141_14104   | 1984  | No  | NA   | 0  | 1              | Not-determined  | Genome-fragment | NA              | 0     | 0     | 0 |
| S1_k141_377899                       | 4823  | No  | NA   | 0  | 1              | Low-quality     | Genome-fragment | NA              | 0     | 0     | 0 |
| S4-final-viral-combined_k141_62926   | 1880  | No  | NA   | 0  | 2              | Not-determined  | Genome-fragment | NA              | 0     | 0     | 0 |
| S4-final-viral-combined_k141_7146    | 3241  | No  | NA   | 0  | 2              | Not-determined  | Genome-fragment | NA              | 0     | 0     | 0 |
| S4-final-viral-combined_k141_97773   | 3019  | No  | NA   | 0  | 2              | Not-determined  | Genome-fragment | NA              | 0     | 0     | 0 |
| S4-final-viral-combined_k141_125578  | 4726  | No  | NA   | 0  | 2              | Not-determined  | Genome-fragment | NA              | 3.59  | 0     | 0 |
| S1-final-viral-combined_k141_25011   | 4825  | No  | NA   | 0  | 1              | Low-quality     | Genome-fragment | NA              | 19.08 | 0     | 0 |
| S17-final-viral-combined_k141_133544 | 4825  | No  | NA   | 7  | 0              | Low-quality     | Genome-fragment | NA              | 0.95  | 0     | 0 |
| S1_k141_378959                       | 4826  | No  | NA   | 0  | 1              | Not-determined  | Genome-fragment | NA              | 0     | 0     | 0 |
| S4-final-viral-combined_k141_28035   | 1577  | No  | NA   | 0  | 1              | Not-determined  | Genome-fragment | NA              | 0     | 0     | 0 |
| S4-final-viral-combined_k141_69991   | 1440  | No  | NA   | 0  | 1              | Not-determined  | Genome-fragment | NA              | 0     | 0     | 0 |
| S4-final-viral-combined_k141_338     | 2312  | No  | NA   | 0  | 2              | Not-determined  | Genome-fragment | NA              | 10.58 | 17.26 | 0 |
| S8_k141_223144                       | 4827  | Yes | 3994 | 2  | 1              | Low-quality     | Genome-fragment | NA              | 0     | 0     | 0 |
| S4-final-viral-combined_k141_146449  | 1122  | No  | NA   | 2  | 1              | Not-determined  | Genome-fragment | NA              | 3.68  | 0     | 0 |
| S8_k141_40172                        | 4827  | No  | NA   | 2  | 1              | Low-quality     | Genome-fragment | NA              | 8.96  | 0     | 0 |
| S4-final-viral-combined_k141_146468  | 2561  | No  | NA   | 0  | 0              | Not-determined  | Genome-fragment | NA              | 1.99  | 0     | 0 |
| S11-final-viral-combined_k141_310844 | 4828  | No  | NA   | 0  | 0              | Low-quality     | Genome-fragment | NA              | 0     | 0     | 0 |
| S17-final-viral-combined_k141_260590 | 4829  | No  | NA   | 0  | 2              | Low-quality     | Genome-fragment | NA              | 0     | 0     | 0 |
| S4-final-viral-combined_k141_28101   | 3563  | No  | NA   | 0  | 2              | Not-determined  | Genome-fragment | NA              | 4.49  | 0     | 0 |
| S4-final-viral-combined_k141_70030   | 1064  | No  | NA   | 0  | 0              | Not-determined  | Genome-fragment | NA              | 0     | 0     | 0 |
| S2_k141_64119                        | 4829  | No  | NA   | 0  | 0              | Low-quality     | Genome-fragment | NA              | 0     | 0     | 0 |
| S4-final-viral-combined_k141_48977   | 3185  | No  | NA   | 0  | 1              | Not-determined  | Genome-fragment | NA              | 4.69  | 0     | 0 |
| S7-final-viral-combined_k141_95507   | 4830  | No  | NA   | 0  | 2              | Low-quality     | Genome-fragment | NA              | 1.79  | 0     | 0 |
| S8_k141_258493                       | 4830  | No  | NA   | 0  | 6              | Low-quality     | Genome-fragment | NA              | 0.43  | 0     | 0 |
| S4-final-viral-combined_k141_118651  | 5283  | No  | NA   | 0  | 2              | Not-determined  | Genome-fragment | NA              | 0     | 0     | 0 |
| S4-final-viral-combined_k141_63034   | 1881  | No  | NA   | 0  | 2              | Not-determined  | Genome-fragment | NA              | 0     | 0     | 0 |
| S3_k141_32237                        | 4832  | No  | NA   | 1  | 1              | Low-quality     | Genome-fragment | NA              | 8.8   | 0     | 0 |
| S11_k141_189794                      | 4833  | No  | NA   | 0  | 0              | Low-quality     | Genome-fragment | NA              | 18.06 | 0     | 0 |
| S12-final-viral-combined_k141_231550 | 4833  | No  | NA   | 1  | 1              | Low-quality     | Genome-fragment | NA              | 0     | 0     | 0 |
| S4-final-viral-combined_k141_76931   | 2428  | No  | NA   | 0  | 3              | Not-determined  | Genome-fragment | NA              | 2.74  | 0     | 0 |
| S12-final-viral-combined_k141_181555 | 4834  | No  | NA   | 0  | 2              | Low-quality     | Genome-fragment | NA              | 0     | 0     | 0 |
| S4-final-viral-combined_k141_104851  | 1202  | No  | NA   | 0  | 2              | Not-determined  | Genome-fragment | NA              | 13.4  | 0     | 0 |
| S8-final-viral-combined_k141_65607   | 4836  | No  | NA   | 2  | 0              | Low-quality     | Genome-fragment | NA              | 0     | 0     | 0 |
| S4-final-viral-combined_k141_76970   | 1241  | No  | NA   | 0  | 0              | Not-determined  | Genome-fragment | NA              | 0     | 0     | 0 |
| S4-final-viral-combined_k141_63060   | 1755  | No  | NA   | 0  | 2              | Not-determined  | Genome-fragment | NA              | 0     | 0     | 0 |
| S4-final-viral-combined_k141_111878  | 1269  | No  | NA   | 0  | 1              | Not-determined  | Genome-fragment | NA              | 0     | 0     | 0 |
| S4-final-viral-combined_k141_56005   | 5916  | No  | NA   | 0  | 3              | Not-determined  | Genome-fragment | NA              | 7.27  | 0     | 0 |
| S4-final-viral-combined_k141_139695  | 1072  | No  | NA   | 6  | 1              | Low-quality     | Genome-fragment | NA              | 0     | 0     | 0 |
| S7-final-viral-combined_k141_4987    | 1937  | No  | NA   | 0  | 1              | Not-determined  | Genome-fragment | NA              | 0     | 0     | 0 |
| S4-final-viral-combined_k141_7310    | 1244  | No  | NA   | 0  | 0              | Not-determined  | Genome-fragment | NA              | 0     | 0     | 0 |
| S4-final-viral-combined_k141_42153   | 2316  | No  | NA   | 0  | 0              | Not-determined  | Genome-fragment | NA              | 2.69  | 0     | 0 |
| S4-final-viral-combined_k141_28218   | 4839  | No  | NA   | 0  | 2              | Low-quality     | Genome-fragment | NA              | 5.95  | 0     | 0 |
| S12-final-viral-combined_k141_365963 | 4840  | No  | NA   | 2  | 0              | Low-quality     | Genome-fragment | NA              | 0.43  | 0     | 0 |
| S12-final-viral-combined_k141_144059 | 4840  | No  | NA   | 5  | 0              | Low-quality     | Genome-fragment | NA              | 7.78  | 0     | 0 |
| S4-final-viral-combined_k141_34429   | 4841  | No  | NA   | 0  | 4              | Not-determined  | Genome-fragment | NA              | 0     | 0     | 0 |
| S11-final-viral-combined_k141_246099 | 13457 | No  | NA   | 0  | 3              | Not-determined  | Genome-fragment | NA              | 0     | 0     | 0 |
| S4-final-viral-combined_k141_104885  | 3680  | No  | NA   | 0  | 2              | Not-determined  | Genome-fragment | NA              | 6.15  | 0     | 0 |
| S4-final-viral-combined_k141_104886  | 2321  | No  | NA   | 0  | 4              | Low-quality     | Genome-fragment | NA              | 0     | 0     | 0 |
| S1-final-viral-combined_k141_245894  | 4843  | No  | NA   | 0  | 2              | Not-determined  | Genome-fragment | NA              | 0     | 0     | 0 |
| S4-final-viral-combined_k141_104892  | 3086  | No  | NA   | 0  | 2              | Not-determined  | Genome-fragment | NA              | 0     | 0     | 0 |
| S4-final-viral-combined_k141_104903  | 1593  | No  | NA   | 0  | 0              | Not-determined  | Genome-fragment | NA              | 3.06  | 0     | 0 |
| S4-final-viral-combined_k141_160564  | 1657  | No  | NA   | 0  | 0              | Not-determined  | Genome-fragment | NA              | 11.23 | 0     | 0 |
| S12-final-viral-combined_k141_243759 | 4843  | No  | NA   | 0  | 1              | Low-quality     | Genome-fragment | NA              | 3.52  | 0     | 0 |
| S11-final-viral-combined_k141_180228 | 4     |     |      |    |                |                 |                 |                 |       |       |   |



|                                      |          |       |     |       |    |   |                |                 |    |       |       |
|--------------------------------------|----------|-------|-----|-------|----|---|----------------|-----------------|----|-------|-------|
| S4-final-viral-combined_k141_841701  | [full]   | 2378  | No  | NA    | 0  | 1 | Not-determined | Genome-fragment | NA | 9.21  | 0     |
| S7-final-viral-combined_k141_1747175 | [full]   | 4865  | No  | NA    | 0  | 1 | Low-quality    | Genome-fragment | NA | 9.49  | 0     |
| S12-final-viral-combined_k141_106901 | [full]   | 4866  | No  | NA    | 0  | 4 | Low-quality    | Genome-fragment | NA | 0     | 0     |
| S4-final-viral-combined_k141_912311  | [full]   | 1555  | No  | NA    | 0  | 2 | Not-determined | Genome-fragment | NA | 0     | 0     |
| S4-final-viral-combined_k141_9941    | [full]   | 5778  | No  | NA    | 0  | 4 | Not-determined | Genome-fragment | NA | 10.06 | 0     |
| S11-final-viral-combined_k141_164629 | [full]   | 4867  | No  | NA    | 4  | 0 | Low-quality    | Genome-fragment | NA | 0     | 0     |
| S4-final-viral-combined_k141_7021    | [full]   | 1231  | No  | NA    | 0  | 0 | Not-determined | Genome-fragment | NA | 0     | 0     |
| S4-final-viral-combined_k141_981121  | [full]   | 5332  | No  | NA    | 0  | 0 | Not-determined | Genome-fragment | NA | 1.96  | 0     |
| S11-final-viral-combined_k141_278911 | [full]   | 4867  | No  | NA    | 0  | 1 | Low-quality    | Genome-fragment | NA | 0     | 0     |
| S4-final-viral-combined_k141_112079  | [full]   | 1420  | No  | NA    | 0  | 1 | Not-determined | Genome-fragment | NA | 0     | 0     |
| S4-final-viral-combined_k141_772801  | [full]   | 2021  | No  | NA    | 0  | 1 | Not-determined | Genome-fragment | NA | 8.37  | 0     |
| S5-final-viral-combined_k141_122397  | [full]   | 4867  | No  | NA    | 1  | 1 | Low-quality    | Genome-fragment | NA | 13.47 | 0     |
| S11-final-viral-combined_k141_275277 | [full]   | 4869  | No  | NA    | 2  | 1 | Low-quality    | Genome-fragment | NA | 96.41 | 0     |
| S4-final-viral-combined_k141_144111  | [full]   | 43509 | No  | NA    | 10 | 0 | High-quality   | High-quality    | NA | 0     | 0     |
| S4-final-viral-combined_k141_49209   | [full]   | 3392  | No  | NA    | 0  | 3 | Not-determined | Genome-fragment | NA | 0     | 0     |
| S4-final-viral-combined_k141_342414  | [full]   | 1489  | No  | NA    | 0  | 2 | Not-determined | Genome-fragment | NA | 14.74 | 0     |
| S1-final-viral-combined_k141_328223  | [full]   | 4869  | No  | NA    | 0  | 2 | Low-quality    | Genome-fragment | NA | 7.19  | 26.62 |
| S1-final-viral-combined_k141_146235  | [full]   | 4872  | Yes | 3575  | 4  | 1 | Not-determined | Genome-fragment | NA | 0     | 0     |
| S4-final-viral-combined_k141_492211  | [full]   | 1482  | No  | NA    | 0  | 1 | Not-determined | Genome-fragment | NA | 75.64 | 0     |
| S4-final-viral-combined_k141_77319   | [full]   | 1664  | No  | NA    | 0  | 1 | Not-determined | Genome-fragment | NA | 0     | 0     |
| S4-final-viral-combined_k141_112093  | [full]   | 25857 | No  | NA    | 15 | 2 | Medium-quality | Genome-fragment | NA | 7.55  | 0     |
| S4-final-viral-combined_k141_118877  | [full]   | 1464  | No  | NA    | 0  | 0 | Not-determined | Genome-fragment | NA | 0     | 0     |
| S11_k141_255440                      |          | 4873  | No  | NA    | 1  | 0 | Low-quality    | Genome-fragment | NA | 0     | 0     |
| S4-final-viral-combined_k141_56278   | [full]   | 7144  | No  | NA    | 0  | 2 | Not-determined | Genome-fragment | NA | 5.16  | 0     |
| S2_k141_63446                        |          | 4873  | No  | NA    | 0  | 2 | Low-quality    | Genome-fragment | NA | 5.41  | 0     |
| S5_k141_15818                        |          | 4874  | No  | NA    | 1  | 0 | Low-quality    | Genome-fragment | NA | 0     | 0     |
| S4-final-viral-combined_k141_215121  | [full]   | 4757  | No  | NA    | 0  | 2 | Not-determined | Genome-fragment | NA | 8.73  | 0     |
| S4-final-viral-combined_k141_118922  | [full]   | 1557  | No  | NA    | 0  | 1 | Not-determined | Genome-fragment | NA | 0     | 0     |
| S4-final-viral-combined_k141_352811  | [full]   | 1723  | No  | NA    | 0  | 0 | Not-determined | Genome-fragment | NA | 0     | 0     |
| S7-final-viral-combined_k141_103381  | [H2gene] | 4874  | No  | NA    | 0  | 0 | Low-quality    | Genome-fragment | NA | 8.16  | 0     |
| S4-final-viral-combined_k141_913741  | [full]   | 2172  | No  | NA    | 0  | 1 | Not-determined | Genome-fragment | NA | 0     | 0     |
| S12-final-viral-combined_k141_251281 | [full]   | 4874  | No  | NA    | 4  | 0 | Not-determined | Genome-fragment | NA | 0     | 0     |
| S4-final-viral-combined_k141_14486   | [full]   | 1223  | No  | NA    | 0  | 0 | Not-determined | Genome-fragment | NA | 0     | 0     |
| S4-final-viral-combined_k141_105180  | [full]   | 1092  | No  | NA    | 0  | 2 | Not-determined | Genome-fragment | NA | 0     | 0     |
| S4-final-viral-combined_k141_781     | [full]   | 1234  | No  | NA    | 0  | 2 | Not-determined | Genome-fragment | NA | 0     | 0     |
| S4-final-viral-combined_k141_843511  | [full]   | 1877  | No  | NA    | 0  | 0 | Not-determined | Genome-fragment | NA | 0     | 0     |
| S4-final-viral-combined_k141_105213  | [full]   | 1674  | No  | NA    | 0  | 1 | Not-determined | Genome-fragment | NA | 0     | 0     |
| S4-final-viral-combined_k141_7871    | [full]   | 5457  | No  | NA    | 0  | 3 | Not-determined | Genome-fragment | NA | 11.26 | 0     |
| S4-final-viral-combined_k141_35296   | [full]   | 7495  | No  | NA    | 0  | 5 | Not-determined | Genome-fragment | NA | 2.6   | 0     |
| S2-final-viral-combined_k141_27607   | [full]   | 4874  | No  | NA    | 0  | 3 | Low-quality    | Genome-fragment | NA | 0     | 0     |
| S6_k141_77591                        |          | 4874  | No  | NA    | 1  | 0 | Low-quality    | Genome-fragment | NA | 0     | 0     |
| S4-final-viral-combined_k141_132918  | [full]   | 2661  | No  | NA    | 0  | 2 | Not-determined | Genome-fragment | NA | 2.61  | 0     |
| S4-final-viral-combined_k141_63345   | [full]   | 3918  | No  | NA    | 0  | 2 | Not-determined | Genome-fragment | NA | 7.6   | 0     |
| S1-final-viral-combined_k141_209398  | [full]   | 4878  | No  | NA    | 0  | 3 | Low-quality    | Genome-fragment | NA | 8.94  | 0     |
| S4-final-viral-combined_k141_140082  | [full]   | 1944  | No  | NA    | 0  | 2 | Not-determined | Genome-fragment | NA | 4.46  | 47.56 |
| S2-final-viral-combined_k141_60181   | [full]   | 4878  | No  | NA    | 0  | 0 | Low-quality    | Genome-fragment | NA | 0     | 0     |
| S1_k141_259639                       |          | 4879  | No  | NA    | 2  | 0 | Low-quality    | Genome-fragment | NA | 0     | 0     |
| S4-final-viral-combined_k141_153883  | [full]   | 2191  | No  | NA    | 0  | 0 | Not-determined | Genome-fragment | NA | 0     | 0     |
| S11_k141_322964                      |          | 4880  | Yes | 2559  | 0  | 1 | Low-quality    | Genome-fragment | NA | 0     | 0     |
| S4-final-viral-combined_k141_42548   | [full]   | 1008  | No  | NA    | 1  | 1 | Not-determined | Genome-fragment | NA | 6.69  | 0     |
| S7_k141_157623                       |          | 4881  | No  | NA    | 0  | 2 | Low-quality    | Genome-fragment | NA | 5.01  | 0     |
| S8-final-viral-combined_k141_266077  | [full]   | 4882  | No  | NA    | 1  | 0 | Low-quality    | Genome-fragment | NA | 0     | 0     |
| S4-final-viral-combined_k141_867     | [full]   | 1958  | No  | NA    | 0  | 3 | Not-determined | Genome-fragment | NA | 0     | 0     |
| S4-final-viral-combined_k141_49342   | [full]   | 4307  | No  | NA    | 0  | 3 | Not-determined | Genome-fragment | NA | 10.98 | 0     |
| S4-final-viral-combined_k141_7614    | [full]   | 4412  | No  | NA    | 0  | 4 | Not-determined | Genome-fragment | NA | 0     | 0     |
| S17-final-viral-combined_k141_3305   | [full]   | 4884  | No  | NA    | 1  | 0 | Low-quality    | Genome-fragment | NA | 0     | 0     |
| S4-final-viral-combined_k141_112248  | [full]   | 1602  | No  | NA    | 0  | 0 | Not-determined | Genome-fragment | NA | 0     | 0     |
| S4-final-viral-combined_k141_36417   | [full]   | 1455  | No  | NA    | 0  | 0 | Not-determined | Genome-fragment | NA | 0.44  | 0     |
| S4-final-viral-combined_k141_91472   | [full]   | 1545  | No  | NA    | 0  | 1 | Not-determined | Genome-fragment | NA | 0     | 0     |
| S11_k141_321848                      |          | 4885  | No  | NA    | 0  | 3 | Low-quality    | Genome-fragment | NA | 0     | 0     |
| S4-final-viral-combined_k141_91481   | [full]   | 1454  | No  | NA    | 0  | 1 | Not-determined | Genome-fragment | NA | 0     | 0     |
| S4-final-viral-combined_k141_28625   | [full]   | 19675 | No  | NA    | 12 | 0 | Not-determined | Genome-fragment | NA | 3.03  | 0     |
| S4-final-viral-combined_k141_63455   | [full]   | 1611  | No  | NA    | 0  | 0 | Not-determined | Genome-fragment | NA | 0     | 0     |
| S1-final-viral-combined_k141_22687   | [full]   | 4885  | No  | NA    | 0  | 3 | Low-quality    | Genome-fragment | NA | 0     | 0     |
| S4-final-viral-combined_k141_91488   | [full]   | 1428  | No  | NA    | 0  | 1 | Not-determined | Genome-fragment | NA | 3.68  | 40.49 |
| S3_k141_43394                        |          | 4885  | Yes | 2907  | 1  | 0 | Low-quality    | Genome-fragment | NA | 8.66  | 0     |
| S4-final-viral-combined_k141_119048  | [full]   | 1866  | No  | NA    | 0  | 0 | Not-determined | Genome-fragment | NA | 2.93  | 0     |
| S11-final-viral-combined_k141_55983  | [full]   | 4886  | No  | NA    | 0  | 1 | Low-quality    | Genome-fragment | NA | 0     | 0     |
| S4-final-viral-combined_k141_17345   | [full]   | 4886  | No  | NA    | 0  | 0 | Not-determined | Genome-fragment | NA | 0     | 0     |
| S4-final-viral-combined_k141_35418   | [full]   | 1849  | No  | NA    | 0  | 0 | Not-determined | Genome-fragment | NA | 0     | 0     |
| S4-final-viral-combined_k141_153992  | [full]   | 2660  | No  | NA    | 0  | 2 | Not-determined | Genome-fragment | NA | 0     | 0     |
| S4-final-viral-combined_k141_56476   | [full]   | 1208  | No  | NA    | 0  | 2 | Not-determined | Genome-fragment | NA | 0     | 0     |
| S4-final-viral-combined_k141_126371  | [full]   | 3732  | No  | NA    | 0  | 2 | Not-determined | Genome-fragment | NA | 0     | 0     |
| S4-final-viral-combined_k141_14592   | [full]   | 2625  | No  | NA    | 0  | 1 | Not-determined | Genome-fragment | NA | 11.6  | 0     |
| S17_k141_96087                       |          | 4886  | No  | NA    | 0  | 5 | High-quality   | High-quality    | NA | 90.26 | 18.81 |
| S4-final-viral-combined_k141_42647   | [full]   | 38640 | Yes | 31372 | 21 | 1 | Not-determined | Genome-fragment | NA | 0     | 0     |
| S4-final-viral-combined_k141_35450   | [full]   | 2839  | No  | NA    | 0  | 1 | Not-determined | Genome-fragment | NA | 0     | 0     |
| S4-final-viral-combined_k141_28694   | [full]   | 3120  | No  | NA    | 0  | 3 | Not-determined | Genome-fragment | NA | 11.5  | 0     |
| S4-final-viral-combined_k141_77496   | [full]   | 1559  | No  | NA    | 0  | 0 | Not-determined | Genome-fragment | NA | 9.54  | 0     |
| S11-final-viral-combined_k141_253422 | [full]   | 4887  | No  | NA    | 0  | 0 | Low-quality    | Genome-fragment | NA | 6.41  | 0     |
| S4_k141_84043                        |          | 4887  | No  | NA    | 1  | 0 | Low-quality    | Genome-fragment | NA | 0     | 0     |
| S6-final-viral-combined_k141_11662   | [full]   | 4887  | No  | NA    | 0  | 0 | Low-quality    | Genome-fragment | NA | 0     | 0     |
| S4-final-viral-combined_k141_77530   | [full]   | 2054  | No  | NA    | 0  | 0 | Not-determined | Genome-fragment | NA | 0     | 0     |
| S4-final-viral-combined_k141_147089  | [full]   | 1785  | No  | NA    | 0  | 3 | Not-determined | Genome-fragment | NA | 1.61  | 0     |
| S12-final-viral-combined_k141_36430  | [full]   | 4888  | No  | NA    | 0  | 1 | Low-quality    | Genome-fragment | NA | 12.62 | 0     |
| S12-final-viral-combined_k141_220510 | [full]   | 4888  | No  | NA    | 3  | 0 | Low-quality    | Genome-fragment | NA | 0     | 0     |
| S4-final-viral-combined_k141_961     | [full]   | 5430  | No  | NA    | 0  | 4 | Not-determined | Genome-fragment | NA | 7.52  | 0     |
| S12_k141_205202                      |          | 4888  | No  | NA    | 2  | 0 | Low-quality    | Genome-fragment | NA | 12.36 | 0     |
| S7-final-viral-combined_k141_225510  | [full]   | 4889  | No  | NA    | 0  | 0 | Low-quality    | Genome-fragment | NA | 0     | 0     |
| S4-final-viral-combined_k141_70657   | [full]   | 3508  | No  | NA    | 0  | 3 | Not-determined | Genome-fragment | NA | 0     | 0     |
| S4-final-viral-combined_k141_119125  | [full]   | 1243  | No  | NA    | 0  | 2 | Not-determined | Genome-fragment | NA | 0     | 0     |
| S4-final-viral-combined_k141_160840  | [full]   | 5268  | No  | NA    | 0  | 0 | Not-determined | Genome-fragment | NA | 0     | 0     |
| S4-final-viral-combined_k141_70673   | [full]   | 1679  | No  | NA    | 0  | 0 | Not-determined | Genome-fragment | NA | 11.58 | 0     |
| S2-final-viral-combined_k141_48037   | [full]   | 4889  | No  | NA    | 1  | 0 | Low-quality    | Genome-fragment | NA | 0     | 0     |
| S4-final-viral-combined_k141_133103  | [full]   | 1290  | No  | NA    | 0  | 3 | Not-determined | Genome-fragment | NA | 0     | 0     |
| S4-final-viral-combined_k141_49445   | [full]   | 6816  | No  | NA    | 0  | 3 | Not-determined | Genome-fragment | NA | 0     | 0     |
| S4-final-viral-combined_k141_105544  | [full]   | 1207  | No  | NA    | 0  | 1 | Not-determined | Genome-fragment | NA | 8.25  | 0     |
| S2-final-viral-combined_k141_106702  | [full]   | 4891  | No  | NA    | 0  | 0 | Low-quality    | Genome-fragment | NA | 0     | 0     |
| S2_k141_93105                        |          | 4891  | No  | NA    | 0  | 1 | Low-quality    | Genome-fragment | NA | 0     | 0     |
| S4-final-viral-combined_k141_133134  | [full]   | 2317  | No  | NA    | 0  | 1 | Not-determined | Genome-fragment | NA | 9.6   | 0     |
| S4-final-viral-combined_k141_112441  | [full]   | 5108  | No  | NA    | 0  | 0 | Not-determined | Genome-fragment | NA | 14.27 | 0     |
| S5_k141_89536                        |          | 4892  | No  | NA    | 3  | 0 | Low-quality    | Genome-fragment | NA | 0.58  | 82.43 |
| S2-final-viral-combined_k141_35763   | [full]   | 4892  | No  | NA    | 3  | 0 | Low-quality    | Genome-fragment | NA | 8.27  | 0     |
| S2-final-viral-combined_k141_184831  | [H2gene] | 4894  | Yes | 860   | 1  | 3 | Low-quality    | Genome-fragment | NA | 0     | 0     |
| S2-final-viral-combined_k141_160941  | [full]   | 4894  | No  | NA    | 0  | 0 | Low-quality    | Genome-fragment | NA | 0     | 0     |
| S4-final-viral-combined_k141_126606  | [full]   | 3510  | No  | NA    | 0  | 2 | Not-determined | Genome-fragment | NA | 10.57 | 0     |
| S4-final-viral-combined_k141_7738    | [full]   | 1737  | No  | NA    | 0  | 0 | Not-determined | Genome-fragment | NA | 2.2   | 0     |
| S8-final-viral-combined_k141_36576   | [full]   | 4894  | No  | NA    | 0  | 0 | Low-quality    | Genome-fragment | NA | 0     | 0     |
| S4-final-viral-combined_k141_35605   | [full]   | 1828  | No  | NA    | 0  | 1 | Not-determined | Genome-fragment | NA | 2.2   | 0     |
| S1-final-viral-combined_k141_130259  | [full]   | 4896  | No  | NA    | 1  | 0 | Low-quality    | Genome-fragment | NA | 12.45 | 0     |
| S5-final-viral-combined_k141_298211  | [full]   | 4897  | No  | NA    | 0  | 1 | Low-quality    | Genome-fragment | NA | 0     | 0     |
| S4-final-viral-combined_k141_42751   | [full]   | 3495  | No  | NA    | 0  | 2 | Not-determined | Genome-fragment | NA | 0     | 0     |
| S4-final-viral-combined_k141_119236  | [full]   | 2595  | No  | NA    | 0  | 2 | Not-determined | Genome-fragment | NA | 3.39  | 44.14 |
| S12-final-viral-combined_k141_6705   | [full]   | 4898  | Yes | 2736  | 1  | 0 | Low-quality    | Genome-fragment | NA | 0     | 0     |
| S4-final-viral-combined_k141_140375  | [full]   | 4703  | No  | NA    | 0  | 0 | Not-determined | Genome-fragment | NA | 0     | 0     |
| S4-final-viral-combined_k141_98469   | [full]   | 1192  | No  | NA    | 0  | 0 | Not-determined | Genome-fragment | NA | 0     | 0     |
| S4-final-viral-combined_k141_77682   | [full]   | 1146  | No  | NA    | 0  | 2 | Not-determined | Genome-fragment | NA | 13.63 | 0     |
| S4-final-viral-combined_k141_39475   | [full]   | 2381  | No  | NA    | 0  | 0 | Not-determined | Genome-fragment | NA | 0     | 0     |
| S12_k141_372914                      |          | 4898  | No  | NA    | 3  | 0 | Low-quality    | Genome-fragment | NA | 0     | 0     |
| S4-final-viral-combined_k141_147263  | [full]   | 1129  | No  | NA    | 0  | 2 | Not-determined | Genome-fragment | NA | 3.74  | 0     |
| S4-final-viral-combined_k141_38485   | [full]   | 2457  | No  | NA    | 0  | 1 | Not-determined | Genome-fragment | NA | 10.51 | 0     |
| S4-final-viral-combined_k141_63720   | [full]   | 5862  | No  | NA    | 0  | 0 | Not-determined | Genome-fragment | NA | 0     | 0     |
| S11-final-viral-combined_k141_193426 | [full]   |       |     |       |    |   |                |                 |    |       |       |



|                                      |        |       |     |    |      |   |                |                 |    |       |       |
|--------------------------------------|--------|-------|-----|----|------|---|----------------|-----------------|----|-------|-------|
| S4-final-viral-combined_k141_986541  | [full] | 1383  | No  | NA | 0    | 0 | Not-determined | Genome-fragment | NA | 2.94  | 0     |
| S11-final-viral-combined_k141_18211  | [full] | 4914  | No  | NA | 0    | 1 | Low-quality    | Genome-fragment | NA | 5.84  | 0     |
| S6-final-viral-combined_k141_107657  | [full] | 4916  | No  | NA | 0    | 0 | Low-quality    | Genome-fragment | NA | 5.84  | 0     |
| S4-final-viral-combined_k141_191529  | [full] | 2701  | No  | NA | 0    | 1 | Not-determined | Genome-fragment | NA | 5.84  | 0     |
| S4-final-viral-combined_k141_12461   | [full] | 8591  | No  | NA | 0    | 0 | Medium-quality | Genome-fragment | NA | 56.65 | 0     |
| S1-final-viral-combined_k141_134681  | [full] | 4917  | No  | NA | 0    | 1 | Low-quality    | Genome-fragment | NA | 3.84  | 0     |
| S4-final-viral-combined_k141_219811  | [full] | 1877  | No  | NA | 0    | 2 | Not-determined | Genome-fragment | NA | 10.25 | 0     |
| S4-final-viral-combined_k141_58683   | [full] | 2368  | No  | NA | 0    | 3 | Not-determined | Genome-fragment | NA | 10.25 | 0     |
| S4-final-viral-combined_k141_780219  | [full] | 1512  | No  | NA | 0    | 1 | Not-determined | Genome-fragment | NA | 10.25 | 0     |
| S11-final-viral-combined_k141_137937 | [full] | 4918  | No  | NA | 2    | 0 | Low-quality    | Genome-fragment | NA | 10.25 | 0     |
| S4-final-viral-combined_k141_126854  | [full] | 6354  | No  | NA | 0    | 5 | Not-determined | Genome-fragment | NA | 8.29  | 0     |
| S4-final-viral-combined_k141_140625  | [full] | 2116  | No  | NA | 0    | 2 | Not-determined | Genome-fragment | NA | 8.29  | 0     |
| S8_k141_164330                       | [full] | 4921  | No  | NA | 0    | 0 | Low-quality    | Genome-fragment | NA | 8.29  | 0     |
| S4-final-viral-combined_k141_126868  | [full] | 3030  | No  | NA | 0    | 0 | Not-determined | Genome-fragment | NA | 8.29  | 0     |
| S4-final-viral-combined_k141_105913  | [full] | 1435  | No  | NA | 0    | 1 | Not-determined | Genome-fragment | NA | 8.29  | 0     |
| S4-final-viral-combined_k141_148551  | [full] | 1159  | No  | NA | 0    | 1 | Not-determined | Genome-fragment | NA | 8.29  | 0     |
| S4-final-viral-combined_k141_8086    | [full] | 2359  | No  | NA | 0    | 1 | Not-determined | Genome-fragment | NA | 8.29  | 0     |
| S4-final-viral-combined_k141_98652   | [full] | 2165  | No  | NA | 0    | 2 | Not-determined | Genome-fragment | NA | 8.29  | 0     |
| S4-final-viral-combined_k141_22032   | [full] | 27205 | Yes | NA | 14   | 3 | Medium-quality | Genome-fragment | NA | 59.98 | 12.1  |
| S9-final-viral-combined_k141_58167   | [full] | 4923  | No  | NA | 3    | 0 | Low-quality    | Genome-fragment | NA | 8.95  | 0     |
| S12_k141_83101                       | [full] | 4923  | No  | NA | 0    | 4 | Low-quality    | Genome-fragment | NA | 0.71  | 0     |
| S11_k141_312448                      | [full] | 4924  | No  | NA | 0    | 4 | Low-quality    | Genome-fragment | NA | 8.97  | 0     |
| S4-final-viral-combined_k141_98712   | [full] | 1599  | No  | NA | 0    | 0 | Not-determined | Genome-fragment | NA | 8.97  | 0     |
| S4-final-viral-combined_k141_154461  | [full] | 5501  | No  | NA | 0    | 3 | Not-determined | Genome-fragment | NA | 8.97  | 0     |
| S4-final-viral-combined_k141_147514  | [full] | 1102  | No  | NA | 0    | 0 | Not-determined | Genome-fragment | NA | 8.97  | 0     |
| S4-final-viral-combined_k141_154475  | [full] | 2456  | No  | NA | 0    | 1 | Not-determined | Genome-fragment | NA | 8.97  | 0     |
| S4-final-viral-combined_k141_29223   | [full] | 7245  | No  | NA | 0    | 2 | Not-determined | Genome-fragment | NA | 8.97  | 0     |
| S4-final-viral-combined_k141_8139    | [full] | 4089  | No  | NA | 0    | 4 | Not-determined | Genome-fragment | NA | 2.26  | 0     |
| S11-final-viral-combined_k141_112521 | [full] | 4925  | No  | NA | 0    | 1 | Low-quality    | Genome-fragment | NA | 2.26  | 0     |
| S2-final-viral-combined_k141_145361  | [full] | 4926  | No  | NA | 0    | 1 | Low-quality    | Genome-fragment | NA | 3.85  | 0     |
| S11-final-viral-combined_k141_190675 | [full] | 4928  | Yes | NA | 2458 | 1 | Low-quality    | Genome-fragment | NA | 1.18  | 50.12 |
| S2_k141_191990                       | [full] | 4929  | No  | NA | 1    | 3 | Low-quality    | Genome-fragment | NA | 0.3   | 0     |
| S4_k141_51413                        | [full] | 4930  | No  | NA | 0    | 0 | Low-quality    | Genome-fragment | NA | 5.14  | 0     |
| S4-final-viral-combined_k141_92076   | [full] | 1808  | No  | NA | 0    | 1 | Not-determined | Genome-fragment | NA | 8.24  | 0     |
| S4_k141_9854                         | [full] | 4933  | No  | NA | 0    | 0 | Low-quality    | Genome-fragment | NA | 8.24  | 0     |
| S4-final-viral-combined_k141_29283   | [full] | 1869  | No  | NA | 0    | 0 | Not-determined | Genome-fragment | NA | 8.24  | 0     |
| S4-final-viral-combined_k141_84935   | [full] | 3672  | No  | NA | 0    | 2 | Not-determined | Genome-fragment | NA | 8.24  | 0     |
| S4-final-viral-combined_k141_84940   | [full] | 3640  | No  | NA | 0    | 0 | Not-determined | Genome-fragment | NA | 8.24  | 0     |
| S8_k141_191537                       | [full] | 4935  | Yes | NA | 1    | 2 | Low-quality    | Genome-fragment | NA | 0.63  | 53.39 |
| S4-final-viral-combined_k141_119632  | [full] | 1518  | No  | NA | 0    | 2 | Not-determined | Genome-fragment | NA | 8.24  | 0     |
| S4-final-viral-combined_k141_147584  | [full] | 2491  | No  | NA | 0    | 3 | Not-determined | Genome-fragment | NA | 11.22 | 0     |
| S4-final-viral-combined_k141_187182  | [full] | 4938  | No  | NA | 0    | 0 | Low-quality    | Genome-fragment | NA | 11.22 | 0     |
| S4-final-viral-combined_k141_29297   | [full] | 1543  | No  | NA | 0    | 2 | Not-determined | Genome-fragment | NA | 8.24  | 0     |
| S4-final-viral-combined_k141_8187    | [full] | 1611  | No  | NA | 0    | 0 | Not-determined | Genome-fragment | NA | 8.24  | 0     |
| S12-final-viral-combined_k141_175447 | [full] | 4939  | No  | NA | 0    | 1 | Low-quality    | Genome-fragment | NA | 5.54  | 0     |
| S4-final-viral-combined_k141_49709   | [full] | 2886  | No  | NA | 0    | 3 | Not-determined | Genome-fragment | NA | 7.95  | 0     |
| S4-final-viral-combined_k141_98759   | [full] | 6345  | No  | NA | 0    | 4 | Not-determined | Genome-fragment | NA | 7.95  | 0     |
| S2-final-viral-combined_k141_218432  | [full] | 4939  | No  | NA | 0    | 2 | Low-quality    | Genome-fragment | NA | 7.95  | 0     |
| S4-final-viral-combined_k141_92145   | [full] | 2811  | No  | NA | 0    | 0 | Not-determined | Genome-fragment | NA | 7.95  | 0     |
| S4-final-viral-combined_k141_29315   | [full] | 3662  | No  | NA | 0    | 3 | Not-determined | Genome-fragment | NA | 7.95  | 0     |
| S4-final-viral-combined_k141_85002   | [full] | 2471  | No  | NA | 0    | 3 | Not-determined | Genome-fragment | NA | 2.13  | 61.66 |
| S9-final-viral-combined_k141_40230   | [full] | 4940  | Yes | NA | 1894 | 1 | Low-quality    | Genome-fragment | NA | 4.64  | 0     |
| S1-final-viral-combined_k141_363003  | [full] | 4940  | No  | NA | 1    | 0 | Low-quality    | Genome-fragment | NA | 4.64  | 0     |
| S4-final-viral-combined_k141_98777   | [full] | 1567  | No  | NA | 0    | 1 | Not-determined | Genome-fragment | NA | 12.97 | 0     |
| S7-final-viral-combined_k141_66762   | [full] | 4940  | No  | NA | 2    | 0 | Low-quality    | Genome-fragment | NA | 4.21  | 0     |
| S4-final-viral-combined_k141_92156   | [full] | 7671  | No  | NA | 0    | 3 | Low-quality    | Genome-fragment | NA | 4.21  | 0     |
| S8-final-viral-combined_k141_65861   | [full] | 4942  | No  | NA | 0    | 3 | Low-quality    | Genome-fragment | NA | 4.21  | 0     |
| S4-final-viral-combined_k141_105979  | [full] | 5382  | No  | NA | 0    | 3 | Not-determined | Genome-fragment | NA | 4.21  | 0     |
| S4-final-viral-combined_k141_1430    | [full] | 1526  | No  | NA | 0    | 2 | Not-determined | Genome-fragment | NA | 4.21  | 0     |
| S4-final-viral-combined_k141_92157   | [full] | 5163  | No  | NA | 0    | 2 | Not-determined | Genome-fragment | NA | 4.21  | 0     |
| S4-final-viral-combined_k141_8219    | [full] | 1018  | No  | NA | 0    | 0 | Not-determined | Genome-fragment | NA | 4.21  | 0     |
| S4-final-viral-combined_k141_49733   | [full] | 1881  | No  | NA | 0    | 0 | Not-determined | Genome-fragment | NA | 4.21  | 0     |
| S4-final-viral-combined_k141_57025   | [full] | 4430  | No  | NA | 0    | 3 | Not-determined | Genome-fragment | NA | 4.21  | 0     |
| S1-final-viral-combined_k141_77444   | [full] | 4943  | No  | NA | 0    | 2 | Low-quality    | Genome-fragment | NA | 2.86  | 0     |
| S2_k141_140295                       | [full] | 4943  | No  | NA | 0    | 2 | Low-quality    | Genome-fragment | NA | 8.43  | 0     |
| S7-final-viral-combined_k141_47539   | [full] | 4944  | No  | NA | 0    | 3 | Low-quality    | Genome-fragment | NA | 6.87  | 0     |
| S17-final-viral-combined_k141_165509 | [full] | 4946  | No  | NA | 2    | 0 | Low-quality    | Genome-fragment | NA | 7.74  | 0     |
| S2_k141_160918                       | [full] | 4946  | No  | NA | 0    | 0 | Low-quality    | Genome-fragment | NA | 11.03 | 0     |
| S4-final-viral-combined_k141_105961  | [full] | 2684  | No  | NA | 0    | 2 | Not-determined | Genome-fragment | NA | 7.44  | 47.22 |
| S7-final-viral-combined_k141_134703  | [full] | 4947  | Yes | NA | 2611 | 2 | Low-quality    | Genome-fragment | NA | 7.44  | 47.22 |
| S4-final-viral-combined_k141_147666  | [full] | 1460  | No  | NA | 0    | 1 | Not-determined | Genome-fragment | NA | 3.39  | 0     |
| S17-final-viral-combined_k141_45520  | [full] | 4947  | No  | NA | 0    | 2 | Low-quality    | Genome-fragment | NA | 3.39  | 0     |
| S4-final-viral-combined_k141_119739  | [full] | 1766  | No  | NA | 0    | 1 | Not-determined | Genome-fragment | NA | 8.25  | 0     |
| S4-final-viral-combined_k141_154622  | [full] | 1611  | No  | NA | 0    | 1 | Not-determined | Genome-fragment | NA | 8.25  | 0     |
| S4-final-viral-combined_k141_2272    | [full] | 3598  | No  | NA | 0    | 1 | Not-determined | Genome-fragment | NA | 8.25  | 0     |
| S4-final-viral-combined_k141_98827   | [full] | 1091  | No  | NA | 0    | 1 | Not-determined | Genome-fragment | NA | 8.25  | 0     |
| S11-final-viral-combined_k141_167462 | [full] | 4948  | No  | NA | 0    | 1 | Low-quality    | Genome-fragment | NA | 11.86 | 0     |
| S17_k141_145897                      | [full] | 4948  | No  | NA | 0    | 0 | Low-quality    | Genome-fragment | NA | 11.86 | 0     |
| S4-final-viral-combined_k141_29385   | [full] | 2792  | No  | NA | 0    | 2 | Not-determined | Genome-fragment | NA | 5.29  | 0     |
| S4-final-viral-combined_k141_49780   | [full] | 1316  | No  | NA | 0    | 0 | Not-determined | Genome-fragment | NA | 5.29  | 0     |
| S6_k141_62995                        | [full] | 4948  | No  | NA | 0    | 0 | Low-quality    | Genome-fragment | NA | 2.28  | 0     |
| S3_k141_16485                        | [full] | 4949  | No  | NA | 0    | 0 | Low-quality    | Genome-fragment | NA | 5.15  | 0     |
| S7_k141_55187                        | [full] | 4949  | No  | NA | 0    | 0 | Low-quality    | Genome-fragment | NA | 5.15  | 0     |
| S4-final-viral-combined_k141_106061  | [full] | 2887  | No  | NA | 0    | 3 | Not-determined | Genome-fragment | NA | 1.44  | 76.09 |
| S4-final-viral-combined_k141_43147   | [full] | 1933  | No  | NA | 0    | 1 | Not-determined | Genome-fragment | NA | 13.48 | 0     |
| S7_k141_184986                       | [full] | 4951  | Yes | NA | 1184 | 1 | Low-quality    | Genome-fragment | NA | 11.2  | 0     |
| S11-final-viral-combined_k141_43960  | [full] | 4954  | No  | NA | 4    | 0 | Low-quality    | Genome-fragment | NA | 11.2  | 0     |
| S4-final-viral-combined_k141_9887    | [full] | 2478  | No  | NA | 0    | 1 | Not-determined | Genome-fragment | NA | 8.27  | 0     |
| S8_k141_153836                       | [full] | 4954  | No  | NA | 2    | 0 | Low-quality    | Genome-fragment | NA | 8.27  | 0     |
| S4-final-viral-combined_k141_127103  | [full] | 1794  | No  | NA | 0    | 0 | Not-determined | Genome-fragment | NA | 8.27  | 0     |
| S4-final-viral-combined_k141_106080  | [full] | 1547  | No  | NA | 0    | 1 | Not-determined | Genome-fragment | NA | 8.27  | 0     |
| S4_k141_43721                        | [full] | 4955  | No  | NA | 3    | 0 | Low-quality    | Genome-fragment | NA | 8.27  | 0     |
| S4-final-viral-combined_k141_43172   | [full] | 4329  | No  | NA | 0    | 4 | Not-determined | Genome-fragment | NA | 17.5  | 0     |
| S4-final-viral-combined_k141_15176   | [full] | 1169  | No  | NA | 0    | 1 | Not-determined | Genome-fragment | NA | 11.95 | 0     |
| S4-final-viral-combined_k141_43151   | [full] | 3609  | No  | NA | 0    | 1 | Not-determined | Genome-fragment | NA | 12.46 | 0     |
| S4-final-viral-combined_k141_106090  | [full] | 1132  | No  | NA | 0    | 1 | Not-determined | Genome-fragment | NA | 7.84  | 0     |
| S4-final-viral-combined_k141_22189   | [full] | 2577  | No  | NA | 0    | 2 | Not-determined | Genome-fragment | NA | 0.85  | 0     |
| S4-final-viral-combined_k141_140523  | [full] | 1336  | No  | NA | 0    | 1 | Not-determined | Genome-fragment | NA | 0.85  | 0     |
| S7-final-viral-combined_k141_154149  | [full] | 4957  | No  | NA | 0    | 2 | Low-quality    | Genome-fragment | NA | 6.79  | 0     |
| S4-final-viral-combined_k141_71182   | [full] | 4158  | No  | NA | 0    | 1 | Not-determined | Genome-fragment | NA | 6.79  | 0     |
| S4_k141_122495                       | [full] | 4958  | No  | NA | 0    | 1 | Low-quality    | Genome-fragment | NA | 6.79  | 0     |
| S4-final-viral-combined_k141_98935   | [full] | 1365  | No  | NA | 0    | 1 | Not-determined | Genome-fragment | NA | 6.79  | 0     |
| S4-final-viral-combined_k141_49866   | [full] | 2573  | No  | NA | 0    | 0 | Not-determined | Genome-fragment | NA | 6.79  | 0     |
| S8-final-viral-combined_k141_25089   | [full] | 4958  | No  | NA | 0    | 1 | Low-quality    | Genome-fragment | NA | 8.22  | 0     |
| S4-final-viral-combined_k141_57123   | [full] | 4794  | No  | NA | 0    | 7 | Medium-quality | Genome-fragment | NA | 17.5  | 0     |
| S4-final-viral-combined_k141_64211   | [full] | 1293  | No  | NA | 0    | 2 | Not-determined | Genome-fragment | NA | 17.5  | 0     |
| S4-final-viral-combined_k141_29503   | [full] | 2613  | No  | NA | 0    | 3 | Not-determined | Genome-fragment | NA | 17.5  | 0     |
| S2_k141_227490                       | [full] | 4959  | No  | NA | 4    | 0 | Low-quality    | Genome-fragment | NA | 8.95  | 0     |
| S4-final-viral-combined_k141_71204   | [full] | 1161  | No  | NA | 0    | 0 | Not-determined | Genome-fragment | NA | 8.95  | 0     |
| S4-final-viral-combined_k141_85163   | [full] | 1165  | No  | NA | 0    | 2 | Not-determined | Genome-fragment | NA | 8.95  | 0     |
| S4-final-viral-combined_k141_127132  | [full] | 2322  | No  | NA | 0    | 2 | Not-determined | Genome-fragment | NA | 8.95  | 0     |
| S4-final-viral-combined_k141_28976   | [full] | 1263  | No  | NA | 0    | 2 | Not-determined | Genome-fragment | NA | 8.95  | 0     |
| S4-final-viral-combined_k141_9897    | [full] | 1835  | No  | NA | 0    | 2 | Not-determined | Genome-fragment | NA | 8.95  | 0     |
| S1_k141_335285                       | [full] | 4960  | No  | NA | 3    | 0 | Low-quality    | Genome-fragment | NA | 17.5  | 0     |
| S4-final-viral-combined_k141_1589    | [full] | 5813  | No  | NA | 0    | 2 | Not-determined | Genome-fragment | NA | 11.95 | 0     |
| S9-final-viral-combined_k141_42761   | [full] | 4961  | No  | NA | 6    | 0 | Low-quality    | Genome-fragment | NA | 11.95 | 0     |
| S4-final-viral-combined_k141_71221   | [full] | 2982  | No  | NA | 0    | 1 | Not-determined | Genome-fragment | NA | 12.46 | 0     |
| S17-final-viral-combined_k141_64418  | [full] | 4961  | No  | NA | 6    | 0 | Low-quality    | Genome-fragment | NA | 7.84  | 0     |
| S2_k141_180228                       | [full] | 4961  | No  | NA | 0    | 0 | Low-quality    | Genome-fragment | NA | 0.85  | 0     |
| S4-final-viral-combined_k141_154784  | [full] | 2172  | No  | NA | 0    | 1 | Not-determined | Genome-fragment | NA | 0.85  | 0     |
| S4-final-viral-combined_k141_106388  | [full] | 1645  | No  |    |      |   |                |                 |    |       |       |



|                                      |          |       |     |    |       |    |                |                 |                 |       |       |
|--------------------------------------|----------|-------|-----|----|-------|----|----------------|-----------------|-----------------|-------|-------|
| S4-final-viral-combined_k141_924551  | [full]   | 7435  | No  | NA | 0     | 1  | Not-determined | Genome-fragment | NA              | 0     | 0     |
| S4-final-viral-combined_k141_112359  | [full]   | 6898  | No  | NA | 0     | 1  | Not-determined | Genome-fragment | NA              | 0     | 0     |
| S17-final-viral-combined_k141_212268 | [full]   | 4974  | No  | NA | 0     | 2  | Low-quality    | Genome-fragment | NA              | 3.7   | 0     |
| S8-final-viral-combined_k141_2053    | [full]   | 4974  | No  | NA | 0     | 2  | Low-quality    | Genome-fragment | NA              | 11.3  | 0     |
| S1-final-viral-combined_k141_194827  | [full]   | 4975  | No  | NA | 0     | 0  | Low-quality    | Genome-fragment | NA              | 11.44 | 0     |
| S4-final-viral-combined_k141_134599  | [full]   | 2456  | No  | NA | 0     | 1  | Not-determined | Genome-fragment | NA              | 0     | 0     |
| S4-final-viral-combined_k141_127371  | [full]   | 1494  | No  | NA | 0     | 1  | Not-determined | Genome-fragment | NA              | 0     | 0     |
| S4-final-viral-combined_k141_16365   | [full]   | 2532  | No  | NA | 0     | 3  | Not-determined | Genome-fragment | NA              | 2.43  | 0     |
| S11-final-viral-combined_k141_256045 | [full]   | 4976  | No  | NA | 0     | 0  | Low-quality    | Genome-fragment | NA              | 13.52 | 0     |
| S4_k141_43123                        |          | 4976  | No  | NA | 2     | 0  | Low-quality    | Genome-fragment | NA              | 0     | 0     |
| S4-final-viral-combined_k141_161832  | [full]   | 2478  | No  | NA | 0     | 2  | Not-determined | Genome-fragment | NA              | 4.83  | 0     |
| S1-final-viral-combined_k141_381406  | [full]   | 4977  | No  | NA | 1     | 0  | Low-quality    | Genome-fragment | NA              | 9.33  | 0     |
| S4_k141_76073                        |          | 4979  | No  | NA | 2     | 0  | Low-quality    | Genome-fragment | NA              | 0     | 0     |
| S4-final-viral-combined_k141_8656    | [full]   | 1074  | No  | NA | 0     | 2  | Not-determined | Genome-fragment | NA              | 0     | 0     |
| S4-final-viral-combined_k141_71456   | [full]   | 7037  | No  | NA | 0     | 1  | Not-determined | Genome-fragment | NA              | 0     | 0     |
| S4-final-viral-combined_k141_155051  | [full]   | 1244  | No  | NA | 0     | 1  | Not-determined | Genome-fragment | NA              | 0     | 0     |
| S4-final-viral-combined_k141_22434   | [full]   | 2608  | No  | NA | 0     | 2  | Not-determined | Genome-fragment | NA              | 0     | 0     |
| S17-final-viral-combined_k141_178388 | [full]   | 4980  | Yes | NA | 1214  | 1  | 2              | Low-quality     | Genome-fragment | 1.87  | 75.62 |
| S4-final-viral-combined_k141_22441   | [full]   | 2044  | No  | NA | 2     | 2  | Not-determined | Genome-fragment | NA              | 0     | 0     |
| S4-final-viral-combined_k141_50139   | [full]   | 1155  | No  | NA | 0     | 0  | Not-determined | Genome-fragment | NA              | 0     | 0     |
| S4-final-viral-combined_k141_29879   | [full]   | 3034  | No  | NA | 0     | 3  | Not-determined | Genome-fragment | NA              | 0     | 0     |
| S4-final-viral-combined_k141_25521   | [full]   | 10342 | No  | NA | 0     | 5  | Not-determined | Genome-fragment | NA              | 0     | 0     |
| S4-final-viral-combined_k141_57503   | [full]   | 1274  | No  | NA | 0     | 2  | Not-determined | Genome-fragment | NA              | 0     | 0     |
| S4-final-viral-combined_k141_113338  | [full]   | 1887  | No  | NA | 0     | 2  | Not-determined | Genome-fragment | NA              | 0     | 0     |
| S4-final-viral-combined_k141_8713    | [full]   | 5836  | No  | NA | 0     | 4  | Not-determined | Genome-fragment | NA              | 11.77 | 0     |
| S5-final-viral-combined_k141_1742    | [full]   | 4981  | No  | NA | 6     | 0  | Low-quality    | Genome-fragment | NA              | 5.94  | 0     |
| S5-final-viral-combined_k141_181375  | [full]   | 4982  | No  | NA | 0     | 4  | Low-quality    | Genome-fragment | NA              | 0     | 0     |
| S4-final-viral-combined_k141_161936  | [full]   | 2520  | No  | NA | 0     | 3  | Not-determined | Genome-fragment | NA              | 0     | 0     |
| S4-final-viral-combined_k141_85541   | [full]   | 1874  | No  | NA | 0     | 0  | Not-determined | Genome-fragment | NA              | 0     | 0     |
| S4-final-viral-combined_k141_134187  | [full]   | 3245  | No  | NA | 0     | 1  | Not-determined | Genome-fragment | NA              | 0     | 0     |
| S4-final-viral-combined_k141_25288   | [full]   | 4210  | No  | NA | 0     | 2  | Not-determined | Genome-fragment | NA              | 6.05  | 0     |
| S17-final-viral-combined_k141_112478 | [full]   | 4982  | No  | NA | 0     | 0  | Low-quality    | Genome-fragment | NA              | 4.19  | 0     |
| S17-final-viral-combined_k141_246525 | [full]   | 4982  | No  | NA | 0     | 1  | Low-quality    | Genome-fragment | NA              | 8.51  | 0     |
| S17-k141_261666                      |          | 4982  | No  | NA | 0     | 4  | Low-quality    | Genome-fragment | NA              | 5.1   | 0     |
| S4-final-viral-combined_k141_135358  | [H2gene] | 4983  | No  | NA | 0     | 0  | Low-quality    | Genome-fragment | NA              | 0     | 0     |
| S4-final-viral-combined_k141_29224   | [full]   | 6608  | No  | NA | 0     | 1  | Not-determined | Genome-fragment | NA              | 0     | 0     |
| S4-final-viral-combined_k141_106568  | [full]   | 9162  | No  | NA | 0     | 6  | Not-determined | Genome-fragment | NA              | 0     | 0     |
| S4-final-viral-combined_k141_199415  | [full]   | 1351  | No  | NA | 0     | 2  | Not-determined | Genome-fragment | NA              | 0     | 0     |
| S4-final-viral-combined_k141_1967    | [full]   | 3808  | No  | NA | 0     | 0  | Not-determined | Genome-fragment | NA              | 0     | 0     |
| S4-final-viral-combined_k141_22581   | [full]   | 1316  | No  | NA | 0     | 2  | Not-determined | Genome-fragment | NA              | 8.16  | 0     |
| S1-final-viral-combined_k141_116660  | [full]   | 4984  | No  | NA | 0     | 1  | Low-quality    | Genome-fragment | NA              | 0     | 0     |
| S4-final-viral-combined_k141_502048  | [full]   | 2278  | No  | NA | 0     | 2  | Not-determined | Genome-fragment | NA              | 0     | 0     |
| S4-final-viral-combined_k141_36489   | [full]   | 2025  | No  | NA | 0     | 2  | Not-determined | Genome-fragment | NA              | 0     | 0     |
| S4-final-viral-combined_k141_85573   | [full]   | 9374  | No  | NA | 0     | 6  | Not-determined | Genome-fragment | NA              | 0     | 0     |
| S4-final-viral-combined_k141_29981   | [full]   | 2676  | No  | NA | 0     | 2  | Not-determined | Genome-fragment | NA              | 3.29  | 0     |
| S2-final-viral-combined_k141_3334    | [full]   | 4985  | No  | NA | 0     | 1  | Low-quality    | Genome-fragment | NA              | 0     | 0     |
| S4-final-viral-combined_k141_134262  | [full]   | 1699  | No  | NA | 0     | 1  | Not-determined | Genome-fragment | NA              | 0     | 0     |
| S4-final-viral-combined_k141_50258   | [full]   | 2415  | No  | NA | 0     | 1  | Not-determined | Genome-fragment | NA              | 2.59  | 0     |
| S4-final-viral-combined_k141_127138  | [full]   | 6760  | No  | NA | 0     | 0  | Not-determined | Genome-fragment | NA              | 2.57  | 0     |
| S8-final-viral-combined_k141_227403  | [full]   | 4985  | No  | NA | 0     | 1  | Low-quality    | Genome-fragment | NA              | 0     | 0     |
| S4_k141_28802                        |          | 4986  | No  | NA | 0     | 1  | Low-quality    | Genome-fragment | NA              | 0     | 0     |
| S4-final-viral-combined_k141_162013  | [full]   | 2953  | No  | NA | 0     | 2  | Not-determined | Genome-fragment | NA              | 0     | 0     |
| S4-final-viral-combined_k141_15691   | [full]   | 1376  | No  | NA | 0     | 1  | Not-determined | Genome-fragment | NA              | 0     | 0     |
| S4-final-viral-combined_k141_50277   | [full]   | 1829  | No  | NA | 0     | 3  | Not-determined | Genome-fragment | NA              | 14.05 | 0     |
| S4-final-viral-combined_k141_71631   | [full]   | 4473  | No  | NA | 0     | 0  | Not-determined | Genome-fragment | NA              | 0     | 0     |
| S7-final-viral-combined_k141_215848  | [full]   | 4987  | No  | NA | 4     | 0  | Low-quality    | Genome-fragment | NA              | 3.12  | 0     |
| S4-final-viral-combined_k141_134298  | [full]   | 4165  | No  | NA | 0     | 4  | Not-determined | Genome-fragment | NA              | 0     | 0     |
| S4-final-viral-combined_k141_25982   | [full]   | 4988  | No  | NA | 0     | 0  | Low-quality    | Genome-fragment | NA              | 56.85 | 46.72 |
| S4-final-viral-combined_k141_157212  | [full]   | 1275  | No  | NA | 0     | 0  | Not-determined | Genome-fragment | NA              | 12.39 | 0     |
| S12-final-viral-combined_k141_125801 | [full]   | 57119 | Yes | NA | 30433 | 14 | 17             | Medium-quality  | Genome-fragment | 0     | 0     |
| S4-final-viral-combined_k141_10421   | [full]   | 4989  | No  | NA | 0     | 0  | Low-quality    | Genome-fragment | NA              | 0     | 0     |
| S4-final-viral-combined_k141_85644   | [full]   | 5466  | No  | NA | 0     | 2  | Not-determined | Genome-fragment | NA              | 0     | 0     |
| S4-final-viral-combined_k141_15742   | [full]   | 7861  | No  | NA | 0     | 3  | Not-determined | Genome-fragment | NA              | 0     | 0     |
| S4-final-viral-combined_k141_43109   | [full]   | 1585  | No  | NA | 0     | 0  | Not-determined | Genome-fragment | NA              | 13.63 | 0     |
| S1-final-viral-combined_k141_57665   | [full]   | 4991  | No  | NA | 1     | 6  | Low-quality    | Genome-fragment | NA              | 8.42  | 0     |
| S4-final-viral-combined_k141_99499   | [full]   | 2100  | No  | NA | 1     | 2  | Not-determined | Genome-fragment | NA              | 0     | 0     |
| S4-final-viral-combined_k141_43756   | [full]   | 2211  | No  | NA | 0     | 0  | Not-determined | Genome-fragment | NA              | 6.96  | 31.63 |
| S4-final-viral-combined_k141_127604  | [full]   | 2803  | No  | NA | 0     | 2  | Not-determined | Genome-fragment | NA              | 8.32  | 0     |
| S8-final-viral-combined_k141_201456  | [full]   | 4992  | Yes | NA | 3413  | 1  | 1              | Low-quality     | Genome-fragment | 7.07  | 0     |
| S4-final-viral-combined_k141_50369   | [full]   | 1984  | No  | NA | 0     | 2  | Not-determined | Genome-fragment | NA              | 5.81  | 46.4  |
| S7-final-viral-combined_k141_50336   | [full]   | 4995  | No  | NA | 0     | 2  | Low-quality    | Genome-fragment | NA              | 2.28  | 0     |
| S12-final-viral-combined_k141_176114 | [full]   | 4995  | No  | NA | 1     | 0  | Low-quality    | Genome-fragment | NA              | 0     | 0     |
| S1-final-viral-combined_k141_144008  | [full]   | 4996  | Yes | NA | 2678  | 1  | 2              | Low-quality     | Genome-fragment | 0     | 0     |
| S4-final-viral-combined_k141_162147  | [full]   | 3712  | No  | NA | 0     | 1  | Not-determined | Genome-fragment | NA              | 0     | 0     |
| S8-final-viral-combined_k141_272359  | [full]   | 4996  | No  | NA | 0     | 2  | Low-quality    | Genome-fragment | NA              | 0     | 0     |
| S4-final-viral-combined_k141_227261  | [full]   | 2710  | No  | NA | 0     | 2  | Not-determined | Genome-fragment | NA              | 0     | 0     |
| S4-final-viral-combined_k141_162162  | [full]   | 3122  | No  | NA | 0     | 1  | Not-determined | Genome-fragment | NA              | 6.62  | 0     |
| S4-final-viral-combined_k141_148281  | [full]   | 3080  | No  | NA | 0     | 3  | Not-determined | Genome-fragment | NA              | 0.73  | 84.45 |
| S2-final-viral-combined_k141_117594  | [full]   | 4997  | No  | NA | 6     | 0  | Low-quality    | Genome-fragment | NA              | 11.09 | 0     |
| S2-final-viral-combined_k141_152126  | [full]   | 4997  | No  | NA | 0     | 1  | Low-quality    | Genome-fragment | NA              | 8.98  | 0     |
| S5-final-viral-combined_k141_142708  | [full]   | 4998  | Yes | NA | 777   | 1  | 0              | Low-quality     | Genome-fragment | 11.87 | 0     |
| S2-final-viral-combined_k141_40604   | [full]   | 4998  | No  | NA | 3     | 0  | Low-quality    | Genome-fragment | NA              | 0     | 0     |
| S11-final-viral-combined_k141_176980 | [full]   | 4999  | No  | NA | 1     | 1  | Low-quality    | Genome-fragment | NA              | 0     | 0     |
| S3-final-viral-combined_k141_243074  | [full]   | 4999  | No  | NA | 0     | 1  | Low-quality    | Genome-fragment | NA              | 0     | 0     |
| S4-final-viral-combined_k141_162201  | [full]   | 2890  | No  | NA | 0     | 2  | Not-determined | Genome-fragment | NA              | 0     | 0     |
| S4-final-viral-combined_k141_155307  | [full]   | 8485  | No  | NA | 0     | 3  | Not-determined | Genome-fragment | NA              | 11.27 | 0     |
| S7-final-viral-combined_k141_40873   | [full]   | 5001  | No  | NA | 4     | 0  | Low-quality    | Genome-fragment | NA              | 0     | 0     |
| S4-final-viral-combined_k141_113461  | [full]   | 3522  | No  | NA | 0     | 1  | Not-determined | Genome-fragment | NA              | 0     | 0     |
| S4-final-viral-combined_k141_187541  | [full]   | 2051  | No  | NA | 0     | 2  | Not-determined | Genome-fragment | NA              | 0     | 0     |
| S4-final-viral-combined_k141_22764   | [full]   | 2553  | No  | NA | 0     | 0  | Not-determined | Genome-fragment | NA              | 5.98  | 0     |
| S4-final-viral-combined_k141_134501  | [full]   | 1513  | No  | NA | 0     | 0  | Low-quality    | Genome-fragment | NA              | 0     | 0     |
| S5_k141_189207                       |          | 5002  | No  | NA | 0     | 2  | Not-determined | Genome-fragment | NA              | 6.14  | 0     |
| S4-final-viral-combined_k141_79008   | [full]   | 1680  | No  | NA | 0     | 2  | Not-determined | Genome-fragment | NA              | 0     | 0     |
| S4-final-viral-combined_k141_57711   | [full]   | 1980  | No  | NA | 0     | 1  | Low-quality    | Genome-fragment | NA              | 0     | 0     |
| S11-final-viral-combined_k141_169752 | [full]   | 5004  | No  | NA | 0     | 1  | Low-quality    | Genome-fragment | NA              | 0     | 0     |
| S4-final-viral-combined_k141_43868   | [full]   | 2624  | No  | NA | 0     | 1  | Not-determined | Genome-fragment | NA              | 0     | 0     |
| S4-final-viral-combined_k141_2156    | [full]   | 1307  | No  | NA | 0     | 1  | Not-determined | Genome-fragment | NA              | 3     | 0     |
| S6_k141_20616                        |          | 5004  | No  | NA | 0     | 0  | Low-quality    | Genome-fragment | NA              | 0.37  | 8.29  |
| S4-final-viral-combined_k141_43893   | [full]   | 2946  | No  | NA | 0     | 3  | Not-determined | Genome-fragment | NA              | 0     | 0     |
| S5-final-viral-combined_k141_17193   | [full]   | 5005  | Yes | NA | 4590  | 1  | 1              | Low-quality     | Genome-fragment | 0     | 0     |
| S4-final-viral-combined_k141_2195    | [full]   | 2672  | No  | NA | 0     | 0  | Not-determined | Genome-fragment | NA              | 11.79 | 0     |
| S4-final-viral-combined_k141_16674   | [full]   | 2211  | No  | NA | 0     | 3  | Not-determined | Genome-fragment | NA              | 11.71 | 0     |
| S5-final-viral-combined_k141_110903  | [full]   | 5005  | No  | NA | 4     | 0  | Low-quality    | Genome-fragment | NA              | 3.45  | 0     |
| S4-final-viral-combined_k141_22838   | [full]   | 1719  | No  | NA | 0     | 1  | Not-determined | Genome-fragment | NA              | 0     | 0     |
| S7-final-viral-combined_k141_117681  | [full]   | 5006  | No  | NA | 3     | 0  | Low-quality    | Genome-fragment | NA              | 4.71  | 0     |
| S4-final-viral-combined_k141_22847   | [full]   | 1177  | No  | NA | 0     | 0  | Not-determined | Genome-fragment | NA              | 0     | 0     |
| S17-final-viral-combined_k141_39807  | [full]   | 5007  | No  | NA | 0     | 2  | Low-quality    | Genome-fragment | NA              | 0     | 0     |
| S4-final-viral-combined_k141_2027    | [full]   | 4155  | No  | NA | 0     | 6  | Not-determined | Genome-fragment | NA              | 0     | 0     |
| S4-final-viral-combined_k141_57816   | [full]   | 6192  | No  | NA | 0     | 3  | Not-determined | Genome-fragment | NA              | 0     | 0     |
| S4-final-viral-combined_k141_2118    | [full]   | 2911  | No  | NA | 0     | 1  | Not-determined | Genome-fragment | NA              | 0     | 0     |
| S12_k141_388144                      |          | 5007  | No  | NA | 0     | 2  | Low-quality    | Genome-fragment | NA              | 4.55  | 0     |
| S4-final-viral-combined_k141_106783  | [full]   | 2368  | No  | NA | 0     | 2  | Not-determined | Genome-fragment | NA              | 2.01  | 81.57 |
| S2-final-viral-combined_k141_186051  | [full]   | 5007  | No  | NA | 0     | 4  | Low-quality    | Genome-fragment | NA              | 0     | 0     |
| S1-final-viral-combined_k141_278415  | [full]   | 5008  | Yes | NA | 923   | 0  | Low-quality    | Genome-fragment | NA              | 0     | 0     |
| S4-final-viral-combined_k141_141541  | [full]   | 7567  | No  | NA | 1     | 3  | Not-determined | Genome-fragment | NA              | 0     | 0     |
| S4-final-viral-combined_k141_57861   | [full]   | 1099  | No  | NA | 0     | 1  | Not-determined | Genome-fragment | NA              | 0     | 0     |
| S4-final-viral-combined_k141_64857   | [full]   | 2262  | No  | NA | 0     | 2  | Not-determined | Genome-fragment | NA              | 0     | 0     |
| S4-final-viral-combined_k141_36754   | [full]   | 1748  | No  | NA | 0     | 1  | Not-determined | Genome-fragment | NA              | 0     | 0     |
| S4-final-viral-combined_k141_148437  | [full]   | 4107  | No  | NA | 0     | 1  | Not-determined | Genome-fragment | NA              | 0     | 0     |
| S4-final-viral-combined_k141_44863   | [full]   | 3524  | No  | NA | 0     | 1  | Not-determined | Genome-fragment | NA              | 0     | 0     |
| S4-final-viral-combined_k141_43979   | [full]   | 2070  | No  | NA | 0     | 0  | Not-determined | Genome-fragment | NA              | 9.04  | 0     |
| S12-final-viral-combined_k141_168810 | [full]   | 5009  | No  | NA | 0     | 2  | Low-quality    | Genome-fragment | NA              | 5.8   |       |



|                                      |        |        |     |       |    |    |                |                 |       |       |
|--------------------------------------|--------|--------|-----|-------|----|----|----------------|-----------------|-------|-------|
| S4-final-viral-combined_k141_107057  | [full] | 9435   | No  | NA    | 0  | 7  | Not-determined | Genome-fragment | NA    | 0     |
| S4-final-viral-combined_k141_106451  | [full] | 6267   | No  | NA    | 1  | 1  | Not-determined | Genome-fragment | NA    | 0     |
| S4-final-viral-combined_k141_72178   | [full] | 1336   | No  | NA    | 0  | 1  | Not-determined | Genome-fragment | NA    | 0     |
| S4-final-viral-combined_k141_107073  | [full] | 1344   | No  | NA    | 0  | 1  | Not-determined | Genome-fragment | NA    | 0     |
| S4-final-viral-combined_k141_155633  | [full] | 2157   | No  | NA    | 0  | 2  | Not-determined | Genome-fragment | NA    | 0     |
| S1_k141_215255                       | [full] | 5030   | No  | NA    | 1  | 0  | Low-quality    | Genome-fragment | NA    | 7.61  |
| S4-final-viral-combined_k141_148666  | [full] | 2210   | No  | NA    | 0  | 2  | Not-determined | Genome-fragment | NA    | 0     |
| S4-final-viral-combined_k141_155640  | [full] | 5627   | No  | NA    | 0  | 2  | Not-determined | Genome-fragment | NA    | 7.74  |
| S17-final-viral-combined_k141_16041  | [full] | 5012   | No  | NA    | 0  | 0  | Low-quality    | Genome-fragment | NA    | 0     |
| S4-final-viral-combined_k141_57963   | [full] | 161252 | Yes | 34348 | 26 | 93 | Medium-quality | Genome-fragment | 51.76 | 78.7  |
| S4-final-viral-combined_k141_134860  | [full] | 7984   | No  | NA    | 0  | 4  | Not-determined | Genome-fragment | NA    | 0     |
| S7_k141_145375                       | [full] | 5028   | Yes | 1694  | 2  | 3  | Low-quality    | Genome-fragment | 3.8   | 66.38 |
| S4-final-viral-combined_k141_44293   | [full] | 3903   | No  | NA    | 0  | 4  | Not-determined | Genome-fragment | NA    | 0     |
| S2_k141_103579                       | [full] | 5039   | No  | NA    | 0  | 0  | Low-quality    | Genome-fragment | 7.7   | 0     |
| S4-final-viral-combined_k141_86203   | [full] | 1968   | No  | NA    | 0  | 1  | Not-determined | Genome-fragment | NA    | 0     |
| S8-final-viral-combined_k141_11568   | [full] | 5029   | No  | NA    | 0  | 2  | Low-quality    | Genome-fragment | NA    | 10.8  |
| S4-final-viral-combined_k141_23217   | [full] | 2567   | No  | NA    | 0  | 1  | Not-determined | Genome-fragment | NA    | 0     |
| S4-final-viral-combined_k141_37088   | [full] | 4103   | No  | NA    | 0  | 0  | Not-determined | Genome-fragment | NA    | 0     |
| S6-final-viral-combined_k141_16880   | [full] | 5041   | No  | NA    | 0  | 3  | Low-quality    | Genome-fragment | 2.69  | 0     |
| S4-final-viral-combined_k141_38073   | [full] | 5042   | No  | NA    | 0  | 4  | Low-quality    | Genome-fragment | 15.77 | 0     |
| S4-final-viral-combined_k141_99651   | [full] | 1052   | No  | NA    | 0  | 1  | Not-determined | Genome-fragment | NA    | 0     |
| S4-final-viral-combined_k141_148711  | [full] | 8521   | No  | NA    | 0  | 3  | Not-determined | Genome-fragment | NA    | 0     |
| S4-final-viral-combined_k141_141902  | [full] | 2911   | No  | NA    | 0  | 3  | Not-determined | Genome-fragment | NA    | 0     |
| S4-final-viral-combined_k141_37121   | [full] | 3513   | No  | NA    | 0  | 2  | Not-determined | Genome-fragment | NA    | 0     |
| S3-final-viral-combined_k141_137799  | [full] | 5043   | No  | NA    | 4  | 0  | Low-quality    | Genome-fragment | 12.44 | 0     |
| S11_k141_4155                        | [full] | 5044   | No  | NA    | 1  | 0  | Low-quality    | Genome-fragment | 13.11 | 0     |
| S4-final-viral-combined_k141_23260   | [full] | 3264   | No  | NA    | 0  | 3  | Not-determined | Genome-fragment | NA    | 0     |
| S8-final-viral-combined_k141_177858  | [full] | 5044   | Yes | 1933  | 1  | 2  | Low-quality    | Genome-fragment | 4.12  | 61.68 |
| S11_k141_65568                       | [full] | 5045   | No  | NA    | 1  | 0  | Low-quality    | Genome-fragment | 0.475 | 0     |
| S4-final-viral-combined_k141_155724  | [full] | 1315   | No  | NA    | 0  | 1  | Not-determined | Genome-fragment | NA    | 0     |
| S4-final-viral-combined_k141_30499   | [full] | 3690   | No  | NA    | 0  | 2  | Not-determined | Genome-fragment | NA    | 0     |
| S5-final-viral-combined_k141_77464   | [full] | 5045   | No  | NA    | 0  | 0  | Low-quality    | Genome-fragment | NA    | 11.63 |
| S4-final-viral-combined_k141_37136   | [full] | 3791   | No  | NA    | 0  | 2  | Not-determined | Genome-fragment | NA    | 0     |
| S4-final-viral-combined_k141_117545  | [full] | 5046   | No  | NA    | 0  | 1  | Low-quality    | Genome-fragment | 7.31  | 0     |
| S11-final-viral-combined_k141_28408  | [full] | 5049   | No  | NA    | 0  | 2  | Low-quality    | Genome-fragment | 13.55 | 0     |
| S4-final-viral-combined_k141_162041  | [full] | 1190   | No  | NA    | 0  | 0  | Not-determined | Genome-fragment | NA    | 0     |
| S3-final-viral-combined_k141_5647    | [full] | 5049   | No  | NA    | 3  | 0  | Low-quality    | Genome-fragment | 10.47 | 0     |
| S4-final-viral-combined_k141_120484  | [full] | 1141   | No  | NA    | 0  | 1  | Not-determined | Genome-fragment | NA    | 0     |
| S4-final-viral-combined_k141_141812  | [full] | 1543   | No  | NA    | 0  | 1  | Not-determined | Genome-fragment | NA    | 0     |
| S4-final-viral-combined_k141_155766  | [full] | 2174   | No  | NA    | 0  | 2  | Not-determined | Genome-fragment | NA    | 0     |
| S1-final-viral-combined_k141_4265    | [full] | 5050   | No  | NA    | 0  | 3  | Low-quality    | Genome-fragment | 8.52  | 0     |
| S11-final-viral-combined_k141_27538  | [full] | 5052   | No  | NA    | 0  | 1  | Low-quality    | Genome-fragment | 13.39 | 0     |
| S4-final-viral-combined_k141_93282   | [full] | 2549   | No  | NA    | 0  | 1  | Not-determined | Genome-fragment | NA    | 0     |
| S4-final-viral-combined_k141_72335   | [full] | 2282   | No  | NA    | 0  | 5  | Not-determined | Genome-fragment | NA    | 0     |
| S4-final-viral-combined_k141_155817  | [full] | 4337   | No  | NA    | 0  | 2  | Not-determined | Genome-fragment | NA    | 0     |
| S4-final-viral-combined_k141_120537  | [full] | 6609   | No  | NA    | 0  | 2  | Not-determined | Genome-fragment | NA    | 0     |
| S4-final-viral-combined_k141_37150   | [full] | 1875   | No  | NA    | 0  | 1  | Not-determined | Genome-fragment | NA    | 0     |
| S4-final-viral-combined_k141_79625   | [full] | 1483   | No  | NA    | 0  | 1  | Not-determined | Genome-fragment | NA    | 0     |
| S4-final-viral-combined_k141_99748   | [full] | 1200   | No  | NA    | 0  | 2  | Not-determined | Genome-fragment | NA    | 0     |
| S4-final-viral-combined_k141_16397   | [full] | 2331   | No  | NA    | 0  | 1  | Not-determined | Genome-fragment | NA    | 0     |
| S12-final-viral-combined_k141_167764 | [full] | 5053   | No  | NA    | 2  | 0  | Low-quality    | Genome-fragment | 11.64 | 0     |
| S4-final-viral-combined_k141_155859  | [full] | 2779   | No  | NA    | 0  | 0  | Not-determined | Genome-fragment | NA    | 0     |
| S4-final-viral-combined_k141_44419   | [full] | 1414   | No  | NA    | 0  | 1  | Not-determined | Genome-fragment | NA    | 0     |
| S1-final-viral-combined_k141_312305  | [full] | 5055   | No  | NA    | 0  | 2  | Low-quality    | Genome-fragment | 3.55  | 0     |
| S8_k141_220180                       | [full] | 5055   | No  | NA    | 3  | 0  | Low-quality    | Genome-fragment | 10.79 | 0     |
| S17-final-viral-combined_k141_183963 | [full] | 5056   | No  | NA    | 0  | 0  | Low-quality    | Genome-fragment | 4.19  | 0     |
| S4-final-viral-combined_k141_86408   | [full] | 3711   | No  | NA    | 0  | 2  | Not-determined | Genome-fragment | NA    | 0     |
| S4-final-viral-combined_k141_148860  | [full] | 5074   | No  | NA    | 0  | 4  | Not-determined | Genome-fragment | NA    | 0     |
| S1-final-viral-combined_k141_103482  | [full] | 5058   | No  | NA    | 0  | 1  | Low-quality    | Genome-fragment | 6.38  | 0     |
| S7-final-viral-combined_k141_3309    | [full] | 5058   | No  | NA    | 0  | 3  | Low-quality    | Genome-fragment | 13.2  | 0     |
| S4-final-viral-combined_k141_113984  | [full] | 1602   | No  | NA    | 0  | 1  | Not-determined | Genome-fragment | NA    | 0     |
| S4-final-viral-combined_k141_2748    | [full] | 2219   | No  | NA    | 0  | 1  | Not-determined | Genome-fragment | NA    | 0     |
| S17-final-viral-combined_k141_186265 | [full] | 5059   | No  | NA    | 1  | 0  | Low-quality    | Genome-fragment | 7.63  | 0     |
| S2-final-viral-combined_k141_108280  | [full] | 5059   | No  | NA    | 0  | 3  | Low-quality    | Genome-fragment | 0.58  | 0     |
| S4-final-viral-combined_k141_148888  | [full] | 1506   | No  | NA    | 0  | 0  | Not-determined | Genome-fragment | NA    | 5.19  |
| S1-final-viral-combined_k141_279629  | [full] | 5060   | No  | NA    | 0  | 3  | Low-quality    | Genome-fragment | 5.8   | 0     |
| S17-k141_85486                       | [full] | 5060   | No  | NA    | 0  | 3  | Low-quality    | Genome-fragment | 6.05  | 0     |
| S4-final-viral-combined_k141_30707   | [full] | 1198   | No  | NA    | 0  | 1  | Not-determined | Genome-fragment | NA    | 0     |
| S4-final-viral-combined_k141_30739   | [full] | 1372   | No  | NA    | 0  | 0  | Not-determined | Genome-fragment | NA    | 0     |
| S4-final-viral-combined_k141_72466   | [full] | 1212   | No  | NA    | 0  | 2  | Not-determined | Genome-fragment | NA    | 0     |
| S4-final-viral-combined_k141_17268   | [full] | 4152   | No  | NA    | 0  | 2  | Not-determined | Genome-fragment | NA    | 0     |
| S4-final-viral-combined_k141_120671  | [full] | 6377   | No  | NA    | 0  | 6  | Not-determined | Genome-fragment | NA    | 5.19  |
| S4-final-viral-combined_k141_107258  | [full] | 2165   | No  | NA    | 0  | 1  | Not-determined | Genome-fragment | NA    | 0     |
| S4-final-viral-combined_k141_37278   | [full] | 1250   | No  | NA    | 0  | 1  | Not-determined | Genome-fragment | NA    | 0     |
| S7-final-viral-combined_k141_88246   | [full] | 5062   | No  | NA    | 0  | 0  | Low-quality    | Genome-fragment | NA    | 0.6   |
| S17-final-viral-combined_k141_83579  | [full] | 5062   | No  | NA    | 0  | 3  | Low-quality    | Genome-fragment | 2.86  | 0     |
| S4-final-viral-combined_k141_120669  | [full] | 4907   | No  | NA    | 0  | 0  | Not-determined | Genome-fragment | NA    | 0     |
| S8-final-viral-combined_k141_24123   | [full] | 5064   | No  | NA    | 1  | 0  | Low-quality    | Genome-fragment | 3.49  | 0     |
| S5-final-viral-combined_k141_7446    | [full] | 5065   | No  | NA    | 0  | 1  | Low-quality    | Genome-fragment | 5.68  | 0     |
| S4-final-viral-combined_k141_155987  | [full] | 1224   | No  | NA    | 0  | 0  | Not-determined | Genome-fragment | NA    | 0     |
| S11_k141_314171                      | [full] | 5066   | No  | NA    | 0  | 2  | Low-quality    | Genome-fragment | 6.1   | 0     |
| S4-final-viral-combined_k141_135099  | [full] | 1844   | No  | NA    | 0  | 2  | Not-determined | Genome-fragment | NA    | 0     |
| S4-final-viral-combined_k141_93450   | [full] | 1374   | No  | NA    | 0  | 0  | Not-determined | Genome-fragment | NA    | 0     |
| S17-final-viral-combined_k141_189075 | [full] | 5067   | No  | NA    | 0  | 4  | Low-quality    | Genome-fragment | 1.19  | 0     |
| S8_k141_34025                        | [full] | 5067   | No  | NA    | 2  | 0  | Low-quality    | Genome-fragment | 8.21  | 0     |
| S1-final-viral-combined_k141_174622  | [full] | 5068   | No  | NA    | 1  | 0  | Low-quality    | Genome-fragment | 10.14 | 0     |
| S4-final-viral-combined_k141_156049  | [full] | 1333   | No  | NA    | 0  | 3  | Not-determined | Genome-fragment | NA    | 0     |
| S4-final-viral-combined_k141_5109    | [full] | 4974   | No  | NA    | 0  | 3  | Not-determined | Genome-fragment | NA    | 0     |
| S4-final-viral-combined_k141_39943   | [full] | 4821   | No  | NA    | 0  | 2  | Not-determined | Genome-fragment | NA    | 0     |
| S8-final-viral-combined_k141_256135  | [full] | 5068   | No  | NA    | 4  | 0  | Low-quality    | Genome-fragment | 12.3  | 0     |
| S4-final-viral-combined_k141_99550   | [full] | 2853   | No  | NA    | 0  | 0  | Not-determined | Genome-fragment | NA    | 0     |
| S4-final-viral-combined_k141_142200  | [full] | 1865   | No  | NA    | 0  | 1  | Not-determined | Genome-fragment | NA    | 0     |
| S8_k141_166057                       | [full] | 5068   | No  | NA    | 3  | 0  | Low-quality    | Genome-fragment | 11.14 | 0     |
| S2-final-viral-combined_k141_7979    | [full] | 5069   | No  | NA    | 0  | 0  | Low-quality    | Genome-fragment | 5.9   | 0     |
| S7-final-viral-combined_k141_178495  | [full] | 5071   | No  | NA    | 0  | 2  | Low-quality    | Genome-fragment | 4.61  | 0     |
| S2_k141_30792                        | [full] | 5071   | No  | NA    | 0  | 4  | Low-quality    | Genome-fragment | 1.89  | 0     |
| S8-final-viral-combined_k141_13611   | [full] | 5073   | No  | NA    | 6  | 0  | Low-quality    | Genome-fragment | 20.06 | 0     |
| S12-final-viral-combined_k141_22589  | [full] | 5074   | No  | NA    | 2  | 0  | Low-quality    | Genome-fragment | 12.08 | 0     |
| S2-final-viral-combined_k141_210621  | [full] | 5074   | No  | NA    | 0  | 1  | Low-quality    | Genome-fragment | NA    | 0     |
| S2_k141_35076                        | [full] | 5076   | No  | NA    | 0  | 2  | Low-quality    | Genome-fragment | 4.6   | 0     |
| S1-final-viral-combined_k141_366518  | [full] | 5077   | No  | NA    | 1  | 0  | Low-quality    | Genome-fragment | 7.96  | 0     |
| S7-final-viral-combined_k141_46949   | [full] | 5077   | No  | NA    | 0  | 1  | Low-quality    | Genome-fragment | 5.63  | 0     |
| S4-final-viral-combined_k141_142293  | [full] | 1661   | No  | NA    | 0  | 1  | Not-determined | Genome-fragment | NA    | 0     |
| S4-final-viral-combined_k141_79805   | [full] | 2301   | No  | NA    | 0  | 4  | Not-determined | Genome-fragment | NA    | 0     |
| S8_k141_41524                        | [full] | 5077   | No  | NA    | 0  | 1  | Low-quality    | Genome-fragment | 2.46  | 0     |
| S4-final-viral-combined_k141_100023  | [full] | 1670   | No  | NA    | 0  | 1  | Not-determined | Genome-fragment | NA    | 0     |
| S4-final-viral-combined_k141_86578   | [full] | 1576   | No  | NA    | 0  | 1  | Not-determined | Genome-fragment | NA    | 0     |
| S4-final-viral-combined_k141_107416  | [full] | 2074   | No  | NA    | 0  | 3  | Not-determined | Genome-fragment | NA    | 0     |
| S4-final-viral-combined_k141_79827   | [full] | 6210   | No  | NA    | 0  | 0  | Not-determined | Genome-fragment | NA    | 0     |
| S4-final-viral-combined_k141_5887    | [full] | 2400   | No  | NA    | 0  | 0  | Not-determined | Genome-fragment | NA    | 0     |
| S4-final-viral-combined_k141_107422  | [full] | 3039   | No  | NA    | 0  | 1  | Not-determined | Genome-fragment | NA    | 0     |
| S4-final-viral-combined_k141_174717  | [full] | 3018   | No  | NA    | 0  | 1  | Not-determined | Genome-fragment | NA    | 0     |
| S4-final-viral-combined_k141_58408   | [full] | 1964   | No  | NA    | 0  | 0  | Not-determined | Genome-fragment | NA    | 0     |
| S4-final-viral-combined_k141_128108  | [full] | 2058   | No  | NA    | 0  | 1  | Not-determined | Genome-fragment | NA    | 0     |
| S7-final-viral-combined_k141_192366  | [full] | 5078   | No  | NA    | 0  | 0  | Low-quality    | Genome-fragment | 5.55  | 0     |
| S4-final-viral-combined_k141_128131  | [full] | 1771   | No  | NA    | 0  | 1  | Not-determined | Genome-fragment | NA    | 0     |
| S17-k141_215918                      | [full] | 1959   | No  | NA    | 0  | 0  | Low-quality    | Genome-fragment | 7.91  | 0     |
| S1-final-viral-combined_k141_26996   | [full] | 5080   | No  | NA    | 0  | 3  | Low-quality    | Genome-fragment | 2.38  | 0     |
| S4-final-viral-combined_k141_9842    | [full] | 1959   | No  | NA    | 0  | 0  | Not-determined | Genome-fragment | NA    | 0     |
| S12-final-viral-combined_k141_61389  | [full] | 5080   | No  | NA    | 1  | 0  | Low-quality    | Genome-fragment | 11.08 | 0     |
| S2_k141_37511                        | [full] | 5080   | No  | NA    | 0  | 0  | Low-quality    | Genome-fragment | 12.01 | 0     |
| S4-final-viral-combined_k141_31015   | [full] | 1562   | No  | NA    | 0  | 0  | Not-determined | Genome-fragment | NA    | 0     |
| S4-final-viral-combined_k141_156252  | [full] | 2431   | No  | NA    | 0  | 0  | Not-determined | Genome-fragment | NA    | 0     |
| S4-final-viral-combined_k141_56629   | [full] | 1121   | No  | NA    | 0  | 0  | Not-determined | Genome-fragment | NA    | 12.01 |
| S5-final-viral-combined_k141_157443  | [full] | 5081   | No  | NA    | 0  | 0  | Low-quality    | Genome-fragment | NA    | 0     |
| S4-final-viral-combined_k141_156300  | [full] | 2356   | No  | NA    | 0  | 0  | Not-determined | Genome-fragment | NA    | 0     |
| S4-final-viral-combined_k141_163002  | [full] | 7206   | No  | NA    | 0  | 5  | Not-determined | Genome-fragment | NA    | 0     |
| S4-final-viral-combined_k141_114186  | [full] | 43825  | No  | NA    | 0  | 0  | Not-determined | Genome-fragment | NA    | 0     |
| S4-final-viral-combined_k141_163010  | [full] | 3026   | No  | NA    | 0  | 0  | Not-determined | Genome-fragment | NA    | 0     |
| S4-final-viral-combined_k141_156322  | [full] | 1476   | No  | NA    | 0  | 1  | Not-determined | Genome-fragment | NA    | 0     |
| S                                    |        |        |     |       |    |    |                |                 |       |       |



|                                               |       |     |      |   |    |                |                 |       |       |
|-----------------------------------------------|-------|-----|------|---|----|----------------|-----------------|-------|-------|
| S5-final-viral-combined_k141_187042]] [full]  | 5108  | No  | NA   | 0 | 2  | Low-quality    | Genome-fragment | 1.63  | 0     |
| S12-final-viral-combined_k141_325559]] [full] | 5108  | No  | NA   | 0 | 0  | Low-quality    | Genome-fragment | 11.6  | 0     |
| S4-final-viral-combined_k141_86900]] [full]   | 2614  | No  | NA   | 0 | 0  | Not-determined | Genome-fragment | NA    | 0     |
| S8-final-viral-combined_k141_124626]] [full]  | 5108  | No  | NA   | 1 | 0  | Low-quality    | Genome-fragment | 10.07 | 0     |
| S4-final-viral-combined_k141_58565]] [full]   | 1852  | No  | NA   | 0 | 3  | Not-determined | Genome-fragment | NA    | 0     |
| S4-final-viral-combined_k141_51328]] [full]   | 1408  | No  | NA   | 0 | 2  | Not-determined | Genome-fragment | NA    | 0     |
| S4-final-viral-combined_k141_114409]] [full]  | 4722  | No  | NA   | 0 | 4  | Not-determined | Genome-fragment | NA    | 0     |
| S4-final-viral-combined_k141_156523]] [full]  | 2214  | No  | NA   | 0 | 2  | Not-determined | Genome-fragment | NA    | 0     |
| S4-final-viral-combined_k141_128475]] [full]  | 7559  | No  | NA   | 0 | 5  | Not-determined | Genome-fragment | NA    | 0     |
| S4-final-viral-combined_k141_10152]] [full]   | 3422  | No  | NA   | 0 | 2  | Not-determined | Genome-fragment | NA    | 0     |
| S11-final-viral-combined_k141_319130]] [full] | 5113  | No  | NA   | 0 | 1  | Low-quality    | Genome-fragment | 8.45  | 0     |
| S4-final-viral-combined_k141_10165]] [full]   | 3615  | No  | NA   | 0 | 2  | Not-determined | Genome-fragment | NA    | 0     |
| S4-final-viral-combined_k141_135508]] [full]  | 1498  | No  | NA   | 0 | 0  | Not-determined | Genome-fragment | NA    | 0     |
| S4-final-viral-combined_k141_45073]] [full]   | 1330  | No  | NA   | 0 | 2  | Not-determined | Genome-fragment | NA    | 0     |
| S4-final-viral-combined_k141_10175]] [full]   | 2876  | No  | NA   | 0 | 1  | Not-determined | Genome-fragment | NA    | 0     |
| S4-final-viral-combined_k141_149420]] [full]  | 1708  | No  | NA   | 0 | 2  | Not-determined | Genome-fragment | NA    | 0     |
| S12-final-viral-combined_k141_325470]] [full] | 5113  | No  | NA   | 2 | 0  | Low-quality    | Genome-fragment | 11.56 | 0     |
| S9-final-viral-combined_k141_90255]] [full]   | 5114  | No  | NA   | 0 | 2  | Low-quality    | Genome-fragment | 1.6   | 0     |
| S4-final-viral-combined_k141_121108]] [full]  | 2863  | No  | NA   | 0 | 1  | Not-determined | Genome-fragment | NA    | 0     |
| S4-final-viral-combined_k141_23997]] [full]   | 1400  | No  | NA   | 0 | 2  | Not-determined | Genome-fragment | NA    | 0     |
| S11-final-viral-combined_k141_51073]] [full]  | 5114  | No  | NA   | 0 | 4  | Low-quality    | Genome-fragment | 2.53  | 0     |
| S11-final-viral-combined_k141_234027]] [full] | 5127  | No  | NA   | 3 | 0  | Low-quality    | Genome-fragment | 10.78 | 0     |
| S4-final-viral-combined_k141_156566]] [full]  | 5145  | No  | NA   | 0 | 0  | Not-determined | Genome-fragment | NA    | 0     |
| S4-final-viral-combined_k141_45126]] [full]   | 1201  | No  | NA   | 0 | 1  | Not-determined | Genome-fragment | NA    | 0     |
| S1-final-viral-combined_k141_327301]] [full]  | 5117  | No  | NA   | 0 | 0  | Low-quality    | Genome-fragment | 27.69 | 0     |
| S4-final-viral-combined_k141_86948]] [full]   | 2152  | No  | NA   | 0 | 0  | Not-determined | Genome-fragment | NA    | 0     |
| S4-final-viral-combined_k141_86961]] [full]   | 1885  | No  | NA   | 0 | 2  | Not-determined | Genome-fragment | NA    | 0     |
| S4-final-viral-combined_k141_128571]] [full]  | 6951  | No  | NA   | 0 | 4  | Not-determined | Genome-fragment | NA    | 0     |
| S4_k141_88819                                 | 5117  | No  | NA   | 0 | 2  | Low-quality    | Genome-fragment | 2.75  | 0     |
| S4-final-viral-combined_k141_26946]] [full]   | 5118  | No  | NA   | 1 | 4  | Low-quality    | Genome-fragment | 7.59  | 0     |
| S12-final-viral-combined_k141_379886]] [full] | 5119  | No  | NA   | 0 | 3  | Low-quality    | Genome-fragment | 9.09  | 0     |
| S12_k141_18970                                | 5119  | No  | NA   | 2 | 0  | Low-quality    | Genome-fragment | 15.14 | 0     |
| S4-final-viral-combined_k141_10264]] [full]   | 3090  | No  | NA   | 0 | 3  | Not-determined | Genome-fragment | NA    | 0     |
| S12-final-viral-combined_k141_20952]] [full]  | 5121  | No  | NA   | 0 | 0  | Low-quality    | Genome-fragment | 3.51  | 0     |
| S4-final-viral-combined_k141_16352]] [full]   | 3006  | No  | NA   | 0 | 3  | Not-determined | Genome-fragment | NA    | 0     |
| S4-final-viral-combined_k141_45116]] [full]   | 1348  | No  | NA   | 0 | 4  | Not-determined | Genome-fragment | NA    | 0     |
| S4-final-viral-combined_k141_73041]] [full]   | 2439  | No  | NA   | 0 | 0  | Not-determined | Genome-fragment | NA    | 0     |
| S4-final-viral-combined_k141_114534]] [full]  | 2903  | No  | NA   | 0 | 2  | Not-determined | Genome-fragment | NA    | 0     |
| S8-final-viral-combined_k141_2821]] [full]    | 5121  | Yes | 864  | 1 | 1  | Low-quality    | Genome-fragment | 1.12  | 81.13 |
| S4-final-viral-combined_k141_73062]] [full]   | 1893  | No  | NA   | 0 | 3  | Not-determined | Genome-fragment | NA    | 0     |
| S4-final-viral-combined_k141_58771]] [full]   | 1740  | No  | NA   | 0 | 1  | Not-determined | Genome-fragment | NA    | 0     |
| S9_k141_58465                                 | 5122  | No  | NA   | 0 | 1  | Low-quality    | Genome-fragment | 3.83  | 0     |
| S4-final-viral-combined_k141_149565]] [full]  | 2638  | No  | NA   | 0 | 3  | Not-determined | Genome-fragment | NA    | 0     |
| S4-final-viral-combined_k141_100566]] [full]  | 4520  | No  | NA   | 0 | 3  | Not-determined | Genome-fragment | NA    | 0     |
| S4-final-viral-combined_k141_27874]] [full]   | 1160  | No  | NA   | 0 | 0  | Not-determined | Genome-fragment | NA    | 0     |
| S4-final-viral-combined_k141_45155]] [full]   | 1073  | No  | NA   | 0 | 2  | Not-determined | Genome-fragment | NA    | 0     |
| S4-final-viral-combined_k141_58798]] [full]   | 9029  | No  | NA   | 0 | 2  | Not-determined | Genome-fragment | NA    | 0     |
| S4-final-viral-combined_k141_121187]] [full]  | 3413  | No  | NA   | 0 | 2  | Not-determined | Genome-fragment | NA    | 0     |
| S1-final-viral-combined_k141_247415]] [full]  | 5123  | No  | NA   | 0 | 1  | Low-quality    | Genome-fragment | 4.64  | 0     |
| S3-final-viral-combined_k141_18305]] [full]   | 5123  | No  | NA   | 0 | 0  | Low-quality    | Genome-fragment | 8.09  | 0     |
| S12-final-viral-combined_k141_240194]] [full] | 5126  | No  | NA   | 4 | 0  | Low-quality    | Genome-fragment | 14.04 | 0     |
| S4-final-viral-combined_k141_65998]] [full]   | 2420  | No  | NA   | 0 | 3  | Not-determined | Genome-fragment | NA    | 0     |
| S4-final-viral-combined_k141_135673]] [full]  | 1858  | No  | NA   | 0 | 0  | Not-determined | Genome-fragment | NA    | 0     |
| S4-final-viral-combined_k141_66000]] [full]   | 2306  | No  | NA   | 0 | 2  | Not-determined | Genome-fragment | NA    | 0     |
| S4-final-viral-combined_k141_45222]] [full]   | 4111  | No  | NA   | 0 | 0  | Not-determined | Genome-fragment | NA    | 0     |
| S4-final-viral-combined_k141_73140]] [full]   | 9174  | No  | NA   | 0 | 6  | Not-determined | Genome-fragment | NA    | 0     |
| S2_k141_7787                                  | 5126  | No  | NA   | 0 | 0  | Low-quality    | Genome-fragment | 3.12  | 0     |
| S17-final-viral-combined_k141_9181]] [full]   | 5128  | No  | NA   | 6 | 0  | Low-quality    | Genome-fragment | 14.06 | 0     |
| S4-final-viral-combined_k141_135686]] [full]  | 1322  | No  | NA   | 0 | 8  | Not-determined | Genome-fragment | NA    | 0     |
| S4-final-viral-combined_k141_10414]] [full]   | 2411  | No  | NA   | 0 | 1  | Not-determined | Genome-fragment | NA    | 0     |
| S4-final-viral-combined_k141_108063]] [full]  | 1032  | No  | NA   | 0 | 2  | Not-determined | Genome-fragment | NA    | 0     |
| S7-final-viral-combined_k141_155388]] [full]  | 5129  | No  | NA   | 0 | 1  | Low-quality    | Genome-fragment | 13.74 | 0     |
| S17-k141_139584                               | 5129  | Yes | 1806 | 1 | 3  | Low-quality    | Genome-fragment | 3     | 64.79 |
| S17-final-viral-combined_k141_248732]] [full] | 5131  | No  | NA   | 0 | 1  | Low-quality    | Genome-fragment | 11.95 | 0     |
| S4-final-viral-combined_k141_108092]] [full]  | 1913  | No  | NA   | 0 | 3  | Not-determined | Genome-fragment | NA    | 0     |
| S4-final-viral-combined_k141_80368]] [full]   | 1799  | No  | NA   | 0 | 2  | Not-determined | Genome-fragment | NA    | 0     |
| S4-final-viral-combined_k141_163450]] [full]  | 1130  | No  | NA   | 0 | 0  | Not-determined | Genome-fragment | NA    | 0     |
| S4-final-viral-combined_k141_16953]] [full]   | 1385  | No  | NA   | 0 | 2  | Not-determined | Genome-fragment | NA    | 0     |
| S4-final-viral-combined_k141_73226]] [full]   | 2221  | No  | NA   | 0 | 0  | Not-determined | Genome-fragment | NA    | 0     |
| S4-final-viral-combined_k141_142924]] [full]  | 3194  | No  | NA   | 0 | 0  | Not-determined | Genome-fragment | NA    | 0     |
| S12-final-viral-combined_k141_186081]] [full] | 5132  | No  | NA   | 2 | 0  | Low-quality    | Genome-fragment | NA    | 14.01 |
| S4-final-viral-combined_k141_128646]] [full]  | 2651  | No  | NA   | 1 | 1  | Not-determined | Genome-fragment | NA    | 34.63 |
| S4-final-viral-combined_k141_162190]] [full]  | 5132  | Yes | 3355 | 1 | 2  | Low-quality    | Genome-fragment | 3.01  | 0     |
| S2_k141_38630                                 | 5134  | No  | NA   | 0 | 4  | Low-quality    | Genome-fragment | 2.87  | 0     |
| S12_k141_84560                                | 5136  | No  | NA   | 1 | 0  | Low-quality    | Genome-fragment | 6.56  | 0     |
| S7-final-viral-combined_k141_144671]] [full]  | 5136  | No  | NA   | 0 | 3  | Low-quality    | Genome-fragment | 1.24  | 0     |
| S12_k141_285564                               | 5137  | No  | NA   | 0 | 0  | Low-quality    | Genome-fragment | 8.51  | 0     |
| S4-final-viral-combined_k141_10463]] [full]   | 2114  | No  | NA   | 0 | 3  | Not-determined | Genome-fragment | NA    | 0     |
| S4-final-viral-combined_k141_149706]] [full]  | 2710  | No  | NA   | 0 | 1  | Not-determined | Genome-fragment | NA    | 0     |
| S4-final-viral-combined_k141_51569]] [full]   | 1852  | No  | NA   | 0 | 0  | Not-determined | Genome-fragment | NA    | 0     |
| S17-k141_224040                               | 5138  | No  | NA   | 0 | 3  | Low-quality    | Genome-fragment | 2.77  | 0     |
| S4-final-viral-combined_k141_58949]] [full]   | 1205  | No  | NA   | 0 | 1  | Not-determined | Genome-fragment | NA    | 0     |
| S12_k141_159329                               | 5138  | No  | NA   | 3 | 0  | Low-quality    | Genome-fragment | 9.1   | 0     |
| S4-final-viral-combined_k141_58973]] [full]   | 6201  | No  | NA   | 0 | 1  | Not-determined | Genome-fragment | NA    | 11.47 |
| S17-final-viral-combined_k141_9722]] [full]   | 5139  | No  | NA   | 3 | 0  | Low-quality    | Genome-fragment | 7.91  | 0     |
| S17-k141_94180                                | 5139  | No  | NA   | 0 | 1  | Low-quality    | Genome-fragment | 9.01  | 0     |
| S4_k141_2247                                  | 5142  | No  | NA   | 4 | 0  | Low-quality    | Genome-fragment | NA    | 0     |
| S4-final-viral-combined_k141_88901]] [full]   | 1129  | No  | NA   | 0 | 0  | Not-determined | Genome-fragment | NA    | 10.94 |
| S7-final-viral-combined_k141_64783]] [full]   | 5143  | No  | NA   | 0 | 4  | Low-quality    | Genome-fragment | 1.77  | 0     |
| S6_k141_101634                                | 5143  | No  | NA   | 0 | 0  | Low-quality    | Genome-fragment | 10.47 | 0     |
| S7-final-viral-combined_k141_78864]] [full]   | 5144  | No  | NA   | 0 | 2  | Low-quality    | Genome-fragment | NA    | 4     |
| S6-final-viral-combined_k141_73367]] [full]   | 5144  | No  | NA   | 0 | 1  | Low-quality    | Genome-fragment | NA    | 0     |
| S4-final-viral-combined_k141_3548]] [full]    | 1461  | No  | NA   | 0 | 1  | Not-determined | Genome-fragment | NA    | 8.89  |
| S4-final-viral-combined_k141_13559]] [full]   | 2950  | No  | NA   | 0 | 1  | Not-determined | Genome-fragment | NA    | 10.92 |
| S11-final-viral-combined_k141_126914]] [full] | 5147  | No  | NA   | 8 | 0  | Low-quality    | Genome-fragment | 1.38  | 0     |
| S17-k141_139946                               | 5147  | No  | NA   | 0 | 3  | Low-quality    | Genome-fragment | NA    | 0     |
| S2_k141_136099                                | 5147  | No  | NA   | 0 | 0  | Not-determined | Genome-fragment | NA    | 12.02 |
| S4-final-viral-combined_k141_94103]] [full]   | 3786  | No  | NA   | 0 | 1  | Low-quality    | Genome-fragment | NA    | 0     |
| S4-final-viral-combined_k141_51578]] [full]   | 7887  | No  | NA   | 0 | 0  | Not-determined | Genome-fragment | NA    | 0     |
| S8-final-viral-combined_k141_156015]] [full]  | 5147  | No  | NA   | 0 | 1  | Low-quality    | Genome-fragment | NA    | 0     |
| S4-final-viral-combined_k141_94104]] [full]   | 1374  | No  | NA   | 0 | 0  | Not-determined | Genome-fragment | NA    | 0     |
| S4-final-viral-combined_k141_108511]] [full]  | 1307  | No  | NA   | 0 | 2  | Not-determined | Genome-fragment | NA    | 0     |
| S4-final-viral-combined_k141_24315]] [full]   | 1585  | No  | NA   | 0 | 2  | Not-determined | Genome-fragment | NA    | 0     |
| S17-k141_132044                               | 5148  | No  | NA   | 0 | 3  | Low-quality    | Genome-fragment | 6.21  | 0     |
| S4-final-viral-combined_k141_80454]] [full]   | 3540  | No  | NA   | 0 | 1  | Not-determined | Genome-fragment | NA    | 0     |
| S4-final-viral-combined_k141_80462]] [full]   | 2912  | No  | NA   | 0 | 2  | Not-determined | Genome-fragment | NA    | 0     |
| S4-final-viral-combined_k141_73346]] [full]   | 1037  | No  | NA   | 0 | 1  | Not-determined | Genome-fragment | NA    | 0     |
| S8_k141_1211                                  | 5148  | No  | NA   | 0 | 5  | Low-quality    | Genome-fragment | 1.65  | 0     |
| S7-final-viral-combined_k141_2744]] [full]    | 5149  | No  | NA   | 0 | 2  | Low-quality    | Genome-fragment | 4.66  | 0     |
| S7_k141_91537                                 | 5149  | No  | NA   | 0 | 3  | Not-determined | Genome-fragment | NA    | 0     |
| S4-final-viral-combined_k141_80480]] [full]   | 2692  | No  | NA   | 0 | 2  | Not-determined | Genome-fragment | NA    | 0     |
| S4-final-viral-combined_k141_149816]] [full]  | 2268  | No  | NA   | 0 | 0  | Not-determined | Genome-fragment | NA    | 0     |
| S7_k141_127084                                | 5151  | No  | NA   | 0 | 1  | Low-quality    | Genome-fragment | 7.71  | 0     |
| S4-final-viral-combined_k141_87206]] [full]   | 1948  | No  | NA   | 0 | 2  | Not-determined | Genome-fragment | NA    | 0     |
| S4-final-viral-combined_k141_108311]] [full]  | 2718  | No  | NA   | 3 | 0  | Low-quality    | Genome-fragment | 11.37 | 0     |
| S12_k141_162235                               | 5151  | No  | NA   | 3 | 0  | Low-quality    | Genome-fragment | NA    | 0     |
| S4-final-viral-combined_k141_45487]] [full]   | 2776  | No  | NA   | 0 | 3  | Not-determined | Genome-fragment | NA    | 0     |
| S4-final-viral-combined_k141_10619]] [full]   | 17050 | No  | NA   | 0 | 10 | Not-determined | Genome-fragment | NA    | 0     |
| S4-final-viral-combined_k141_80525]] [full]   | 2623  | No  | NA   | 0 | 1  | Not-determined | Genome-fragment | NA    | 6.93  |
| S7-final-viral-combined_k141_2452]] [full]    | 5152  | Yes | 4795 | 2 | 1  | Low-quality    | Genome-fragment | 8.1   | 51.83 |
| S17-k141_173334                               | 5155  | Yes | 2483 | 1 | 1  | Low-quality    | Genome-fragment | 1.83  | 0     |
| S6_k141_88773                                 | 5156  | No  | NA   | 0 | 1  | Low-quality    | Genome-fragment | 2.14  | 0     |
| S4-final-viral-combined_k141_80541]] [full]   | 3774  | No  | NA   | 0 | 2  | Not-determined | Genome-fragment | NA    | 0     |
| S2-final-viral-combined_k141_11046]] [full]   | 5157  | No  | NA   | 0 | 0  | Low-quality    | Genome-fragment | 10.82 | 0     |
| S4-final-viral-combined_k141_108323]] [full]  | 2124  | No  | NA   | 0 | 0  | Not-determined | Genome-fragment | NA    | 0     |
| S4-final-viral-combined_k141_143116]] [full]  | 3803  | No  | NA   | 0 | 3  | Not-determined | Genome-fragment | NA    | 0     |
| S6-final-viral-combined_k141_78377]] [full]   | 5157  | No  | NA   | 0 | 2  | Low-quality    | Genome-fragment | 5.17  | 0     |
| S4-final-viral-combined_k141_143127]] [full]  | 1600  | No  | NA   | 0 | 2  | Not-determined | Genome-fragment | NA    | 0     |
| S4-final-viral-combined_k141_100904]] [full]  | 2105  | No  | NA   | 0 | 0  | Not-determined | Genome-fragment | NA    | 0     |
| S4-final-viral-combined_k141_149900]] [full]  | 3475  | No  | NA   | 0 | 4  | Not-determined | Genome-fragment | NA    | 0     |
| S17-k141_207989                               | 5158  | No  | NA   | 0 | 0  | Low-quality    | Genome-fragment | 6.87  | 0     |
| S6-final-viral-combined_k141_88092]] [full]   | 5158  | No  | NA   | 0 | 2  | Low-quality    | Genome-fragment | 1.73  | 0     |
| S4-final-viral-combined_k141_87262]] [full]   | 1898  | No  | NA   | 0 | 1  | Not-determined | Genome-fragment | NA    | 0     |
| S4-final-viral-combined_k141_100926]] [full]  | 2638  | No  | NA   | 0 | 1  | Not-determined | Genome-fragment | NA    | 0     |
| S4-final-viral-combined_k141_59152]] [full]   | 1621  | No  | NA   | 0 | 2  | Not-determined | Genome-fragment | NA    | 0     |
| S4-final-viral-combined_k141_66344]] [full]   | 1891  | No  | NA   |   |    |                |                 |       |       |



|                                      |        |        |     |    |       |    |                |                 |                 |       |
|--------------------------------------|--------|--------|-----|----|-------|----|----------------|-----------------|-----------------|-------|
| S4-final-viral-combined_k141_45697   | [Full] | 2932   | No  | NA | 0     | 3  | Not-determined | Genome-fragment | NA              | 0     |
| S4-final-viral-combined_k141_51805   | [Full] | 3613   | No  | NA | 0     | 2  | Not-determined | Genome-fragment | NA              | 0     |
| S4-final-viral-combined_k141_94428   | [Full] | 4334   | No  | NA | 0     | 2  | Not-determined | Genome-fragment | NA              | 0     |
| S4-final-viral-combined_k141_120003  | [Full] | 3563   | No  | NA | 0     | 4  | Not-determined | Genome-fragment | NA              | 0     |
| S4-final-viral-combined_k141_51832   | [Full] | 1202   | No  | NA | 0     | 1  | Not-determined | Genome-fragment | NA              | 0     |
| S4-final-viral-combined_k141_51843   | [Full] | 1901   | No  | NA | 0     | 0  | Not-determined | Genome-fragment | NA              | 0     |
| S4-final-viral-combined_k141_38394   | [Full] | 2158   | No  | NA | 0     | 0  | Not-determined | Genome-fragment | NA              | 0     |
| S4-final-viral-combined_k141_47490   | [Full] | 5177   | No  | NA | 0     | 1  | Low-quality    | Genome-fragment | NA              | 0     |
| S4-final-viral-combined_k141_45757   | [Full] | 4138   | No  | NA | 0     | 0  | Not-determined | Genome-fragment | NA              | 0     |
| S12_k141_283848                      |        | 5179   | No  | NA | 4     | 0  | Low-quality    | Genome-fragment | NA              | 12.86 |
| S2-final-viral-combined_k141_83017   | [Full] | 5183   | No  | NA | 1     | 0  | Low-quality    | Genome-fragment | NA              | 5.7   |
| S1-final-viral-combined_k141_237518  | [Full] | 5184   | No  | NA | 0     | 0  | Low-quality    | Genome-fragment | NA              | 13.41 |
| S4-final-viral-combined_k141_51888   | [Full] | 3041   | No  | NA | 0     | 1  | Not-determined | Genome-fragment | NA              | 0     |
| S4-final-viral-combined_k141_136195  | [Full] | 6111   | No  | NA | 0     | 7  | Not-determined | Genome-fragment | NA              | 0     |
| S4-final-viral-combined_k141_17284   | [Full] | 73022  | Yes | NA | 36004 | 19 | 17             | Complete        | High-quality    | 100   |
| S4-final-viral-combined_k141_150097  | [Full] | 3602   | No  | NA | 1     | 0  | Not-determined | Genome-fragment | NA              | 50.69 |
| S2-final-viral-combined_k141_53322   | [Full] | 5185   | No  | NA | 0     | 0  | Low-quality    | Genome-fragment | NA              | 11.74 |
| S4-final-viral-combined_k141_163860  | [Full] | 3130   | No  | NA | 0     | 3  | Not-determined | Genome-fragment | NA              | 0     |
| S4_k141_644                          |        | 5188   | Yes | NA | 1     | 3  | Low-quality    | Genome-fragment | NA              | 1.28  |
| S4-final-viral-combined_k141_51904   | [Full] | 3235   | No  | NA | 0     | 0  | Not-determined | Genome-fragment | NA              | 61.74 |
| S17-final-viral-combined_k141_84605  | [Full] | 5192   | No  | NA | 0     | 2  | Low-quality    | Genome-fragment | NA              | 0     |
| S4-final-viral-combined_k141_10857   | [Full] | 2558   | No  | NA | 0     | 1  | Not-determined | Genome-fragment | NA              | 1.74  |
| S4-final-viral-combined_k141_80780   | [Full] | 2489   | No  | NA | 0     | 1  | Not-determined | Genome-fragment | NA              | 0     |
| S4-final-viral-combined_k141_24659   | [Full] | 9268   | No  | NA | 1     | 0  | Medium-quality | Genome-fragment | NA              | 55.68 |
| S4-final-viral-combined_k141_31922   | [Full] | 1207   | No  | NA | 0     | 2  | Low-quality    | Genome-fragment | NA              | 0     |
| S12-final-viral-combined_k141_39846  | [Full] | 5192   | No  | NA | 0     | 1  | Low-quality    | Genome-fragment | NA              | 13.95 |
| S2_k141_52976                        |        | 5192   | No  | NA | 0     | 1  | Low-quality    | Genome-fragment | NA              | 13.82 |
| S4-final-viral-combined_k141_87470   | [Full] | 1161   | No  | NA | 0     | 2  | Not-determined | Genome-fragment | NA              | 0     |
| S3-final-viral-combined_k141_134750  | [Full] | 5194   | Yes | NA | 4044  | 1  | Low-quality    | Genome-fragment | NA              | 2.58  |
| S4-final-viral-combined_k141_101181  | [Full] | 3502   | No  | NA | 1     | 1  | Not-determined | Genome-fragment | NA              | 22.14 |
| S11-final-viral-combined_k141_94158  | [Full] | 5196   | Yes | NA | 3687  | 1  | 1              | Low-quality     | Genome-fragment | 5.94  |
| S4-final-viral-combined_k141_10857   | [Full] | 3432   | No  | NA | 0     | 3  | Not-determined | Genome-fragment | NA              | 29.04 |
| S4-final-viral-combined_k141_143474  | [Full] | 8021   | No  | NA | 0     | 7  | Not-determined | Genome-fragment | NA              | 0     |
| S11-final-viral-combined_k141_130456 | [Full] | 5199   | No  | NA | 1     | 0  | Low-quality    | Genome-fragment | NA              | 9.42  |
| S12-final-viral-combined_k141_200757 | [Full] | 5199   | No  | NA | 1     | 0  | Low-quality    | Genome-fragment | NA              | 7.4   |
| S4-final-viral-combined_k141_3980    | [Full] | 2777   | No  | NA | 0     | 2  | Not-determined | Genome-fragment | NA              | 0     |
| S4-final-viral-combined_k141_59429   | [Full] | 1831   | No  | NA | 0     | 3  | Not-determined | Genome-fragment | NA              | 0     |
| S1-final-viral-combined_k141_123138  | [Full] | 5202   | No  | NA | 0     | 4  | Low-quality    | Genome-fragment | NA              | 8.92  |
| S4-final-viral-combined_k141_66718   | [Full] | 4142   | No  | NA | 0     | 0  | Not-determined | Genome-fragment | NA              | 0     |
| S12-final-viral-combined_k141_349489 | [Full] | 5202   | No  | NA | 0     | 2  | Low-quality    | Genome-fragment | NA              | 3.2   |
| S12-final-viral-combined_k141_312915 | [Full] | 5203   | No  | NA | 1     | 0  | Low-quality    | Genome-fragment | NA              | 12.47 |
| S4-final-viral-combined_k141_51995   | [Full] | 4244   | No  | NA | 0     | 5  | Not-determined | Genome-fragment | NA              | 0     |
| S17-k141_13418                       |        | 5206   | No  | NA | 1     | 0  | Low-quality    | Genome-fragment | NA              | 8.63  |
| S12-final-viral-combined_k141_121853 | [Full] | 5209   | No  | NA | 0     | 2  | Low-quality    | Genome-fragment | NA              | 2.89  |
| S4-final-viral-combined_k141_38581   | [Full] | 1195   | No  | NA | 0     | 1  | Not-determined | Genome-fragment | NA              | 0     |
| S4-final-viral-combined_k141_73831   | [Full] | 1719   | No  | NA | 0     | 1  | Not-determined | Genome-fragment | NA              | 0     |
| S4-final-viral-combined_k141_143554  | [Full] | 5339   | No  | NA | 0     | 2  | Not-determined | Genome-fragment | NA              | 0     |
| S12_k141_269802                      |        | 5210   | No  | NA | 1     | 0  | Low-quality    | Genome-fragment | NA              | 5.99  |
| S4-final-viral-combined_k141_143555  | [Full] | 2796   | No  | NA | 0     | 0  | Not-determined | Genome-fragment | NA              | 0     |
| S4-final-viral-combined_k141_129236  | [Full] | 2402   | No  | NA | 0     | 0  | Not-determined | Genome-fragment | NA              | 0     |
| S4-final-viral-combined_k141_52002   | [Full] | 2778   | No  | NA | 0     | 2  | Not-determined | Genome-fragment | NA              | 0     |
| S4-final-viral-combined_k141_10907   | [Full] | 2402   | No  | NA | 0     | 2  | Not-determined | Genome-fragment | NA              | 0     |
| S4-final-viral-combined_k141_129251  | [Full] | 4971   | No  | NA | 0     | 3  | Not-determined | Genome-fragment | NA              | 0     |
| S4-final-viral-combined_k141_52032   | [Full] | 2609   | No  | NA | 0     | 2  | Not-determined | Genome-fragment | NA              | 0     |
| S4-final-viral-combined_k141_123821  | [Full] | 3204   | No  | NA | 0     | 2  | Not-determined | Genome-fragment | NA              | 0     |
| S8-final-viral-combined_k141_18886   | [Full] | 5212   | No  | NA | 1     | 0  | Low-quality    | Genome-fragment | NA              | 12.18 |
| S1-final-viral-combined_k141_370912  | [Full] | 5213   | No  | NA | 0     | 1  | Low-quality    | Genome-fragment | NA              | 3.69  |
| S4-final-viral-combined_k141_81006   | [Full] | 1376   | No  | NA | 0     | 1  | Not-determined | Genome-fragment | NA              | 2.66  |
| S2-final-viral-combined_k141_137489  | [Full] | 5213   | No  | NA | 0     | 0  | Low-quality    | Genome-fragment | NA              | 0     |
| S4-final-viral-combined_k141_115277  | [Full] | 8060   | No  | NA | 0     | 0  | Not-determined | Genome-fragment | NA              | 0     |
| S4-final-viral-combined_k141_24588   | [Full] | 1269   | No  | NA | 0     | 1  | Not-determined | Genome-fragment | NA              | 0     |
| S1_k141_28287                        |        | 5214   | No  | NA | 0     | 1  | Low-quality    | Genome-fragment | NA              | 0.88  |
| S4-final-viral-combined_k141_52055   | [Full] | 4861   | No  | NA | 0     | 1  | Not-determined | Genome-fragment | NA              | 0     |
| S3_k141_78767                        |        | 5215   | No  | NA | 1     | 1  | Low-quality    | Genome-fragment | NA              | 13.43 |
| S7_k141_157175                       |        | 5219   | No  | NA | 0     | 0  | Low-quality    | Genome-fragment | NA              | 3.12  |
| S2_k141_29550                        |        | 5219   | No  | NA | 5     | 0  | Low-quality    | Genome-fragment | NA              | 10.84 |
| S4-final-viral-combined_k141_164127  | [Full] | 1323   | No  | NA | 0     | 0  | Not-determined | Genome-fragment | NA              | 0     |
| S6_k141_74360                        |        | 5220   | No  | NA | 0     | 2  | Low-quality    | Genome-fragment | NA              | 12.42 |
| S7_k141_191546                       |        | 5221   | No  | NA | 0     | 0  | Low-quality    | Genome-fragment | NA              | 10.24 |
| S2-final-viral-combined_k141_174800  | [Full] | 5221   | No  | NA | 7     | 0  | Low-quality    | Genome-fragment | NA              | 12.02 |
| S4-final-viral-combined_k141_164140  | [Full] | 1523   | No  | NA | 0     | 0  | Not-determined | Genome-fragment | NA              | 0     |
| S4-final-viral-combined_k141_38658   | [Full] | 4701   | No  | NA | 0     | 5  | Not-determined | Genome-fragment | NA              | 0     |
| S2_k141_235375                       |        | 5221   | No  | NA | 3     | 0  | Low-quality    | Genome-fragment | NA              | 34.82 |
| S5-final-viral-combined_k141_161149  | [Full] | 5224   | No  | NA | 3     | 0  | Low-quality    | Genome-fragment | NA              | 9.54  |
| S4-final-viral-combined_k141_59507   | [Full] | 1160   | No  | NA | 0     | 2  | Not-determined | Genome-fragment | NA              | 0     |
| S4-final-viral-combined_k141_66929   | [Full] | 1737   | No  | NA | 0     | 0  | Not-determined | Genome-fragment | NA              | 0     |
| S4-final-viral-combined_k141_24970   | [Full] | 1415   | No  | NA | 0     | 2  | Not-determined | Genome-fragment | NA              | 0     |
| S9_k141_48364                        |        | 5225   | No  | NA | 2     | 0  | Low-quality    | Genome-fragment | NA              | 9.09  |
| S4-final-viral-combined_k141_87641   | [Full] | 3251   | No  | NA | 0     | 1  | Not-determined | Genome-fragment | NA              | 0     |
| S4-final-viral-combined_k141_143683  | [Full] | 2303   | No  | NA | 0     | 2  | Not-determined | Genome-fragment | NA              | 0     |
| S4-final-viral-combined_k141_4771    | [Full] | 4500   | No  | NA | 0     | 4  | Not-determined | Genome-fragment | NA              | 0     |
| S4-final-viral-combined_k141_104851  | [Full] | 1521   | No  | NA | 0     | 1  | Not-determined | Genome-fragment | NA              | 0     |
| S4-final-viral-combined_k141_66954   | [Full] | 10155  | No  | NA | 0     | 5  | Not-determined | Genome-fragment | NA              | 0     |
| S4-final-viral-combined_k141_105396  | [Full] | 1797   | No  | NA | 0     | 2  | Not-determined | Genome-fragment | NA              | 0     |
| S11_k141_8585                        |        | 5227   | No  | NA | 8     | 0  | Low-quality    | Genome-fragment | NA              | 13.36 |
| S4-final-viral-combined_k141_59628   | [Full] | 2353   | No  | NA | 0     | 0  | Not-determined | Genome-fragment | NA              | 0     |
| S4-final-viral-combined_k141_11241   | [Full] | 1125   | No  | NA | 0     | 1  | Not-determined | Genome-fragment | NA              | 0     |
| S4-final-viral-combined_k141_21275   | [Full] | 2498   | No  | NA | 0     | 2  | Not-determined | Genome-fragment | NA              | 0     |
| S4-final-viral-combined_k141_157451  | [Full] | 10852  | No  | NA | 0     | 1  | Not-determined | Genome-fragment | NA              | 0     |
| S6-final-viral-combined_k141_102876  | [Full] | 5227   | No  | NA | 0     | 2  | Low-quality    | Genome-fragment | NA              | 1.65  |
| S4-final-viral-combined_k141_25049   | [Full] | 1801   | No  | NA | 0     | 1  | Not-determined | Genome-fragment | NA              | 0     |
| S4-final-viral-combined_k141_81377   | [Full] | 1394   | No  | NA | 0     | 1  | Not-determined | Genome-fragment | NA              | 0     |
| S4-final-viral-combined_k141_46192   | [Full] | 1423   | No  | NA | 0     | 2  | Not-determined | Genome-fragment | NA              | 0     |
| S2-final-viral-combined_k141_24636   | [Full] | 5230   | No  | NA | 0     | 1  | Low-quality    | Genome-fragment | NA              | 5.57  |
| S4-final-viral-combined_k141_38829   | [Full] | 6821   | No  | NA | 0     | 0  | Not-determined | Genome-fragment | NA              | 0     |
| S17-final-viral-combined_k141_38250  | [Full] | 5232   | No  | NA | 2     | 0  | Low-quality    | Genome-fragment | NA              | 7.52  |
| S4-final-viral-combined_k141_59693   | [Full] | 3212   | No  | NA | 0     | 3  | Not-determined | Genome-fragment | NA              | 0     |
| S4-final-viral-combined_k141_116883  | [Full] | 5234   | No  | NA | 0     | 0  | Low-quality    | Genome-fragment | NA              | 1.7   |
| S4-final-viral-combined_k141_24878   | [Full] | 2755   | No  | NA | 0     | 2  | Not-determined | Genome-fragment | NA              | 0     |
| S1_k141_159141                       |        | 5235   | Yes | NA | 3956  | 1  | 1              | Low-quality     | Genome-fragment | 5.68  |
| S4-final-viral-combined_k141_101570  | [Full] | 2011   | No  | NA | 0     | 0  | Not-determined | Genome-fragment | NA              | 24.43 |
| S4-final-viral-combined_k141_136592  | [Full] | 2044   | No  | NA | 0     | 0  | Not-determined | Genome-fragment | NA              | 0     |
| S7_k141_11341                        |        | 5235   | No  | NA | 0     | 3  | Low-quality    | Genome-fragment | NA              | 6.34  |
| S4-final-viral-combined_k141_121978  | [Full] | 129425 | Yes | NA | 45051 | 24 | 53             | Complete        | High-quality    | 100   |
| S9_k141_44463                        |        | 5237   | No  | NA | 0     | 2  | Low-quality    | Genome-fragment | NA              | 65.19 |
| S4-final-viral-combined_k141_4291    | [Full] | 1021   | No  | NA | 0     | 0  | Not-determined | Genome-fragment | NA              | 3.41  |
| S4-final-viral-combined_k141_32288   | [Full] | 2495   | No  | NA | 0     | 2  | Not-determined | Genome-fragment | NA              | 0     |
| S11-final-viral-combined_k141_80893  | [Full] | 5240   | Yes | NA | 4389  | 2  | 1              | Low-quality     | Genome-fragment | 6.36  |
| S12_k141_191313                      |        | 5241   | No  | NA | 0     | 0  | Low-quality    | Genome-fragment | NA              | 16.24 |
| S4-final-viral-combined_k141_101599  | [Full] | 1739   | No  | NA | 0     | 3  | Not-determined | Genome-fragment | NA              | 5.61  |
| S2-final-viral-combined_k141_187528  | [Full] | 5242   | No  | NA | 0     | 0  | Low-quality    | Genome-fragment | NA              | 9.03  |
| S2-final-viral-combined_k141_28847   | [Full] | 5242   | No  | NA | 0     | 0  | Low-quality    | Genome-fragment | NA              | 3.07  |
| S4-final-viral-combined_k141_164405  | [Full] | 1222   | No  | NA | 0     | 1  | Not-determined | Genome-fragment | NA              | 0     |
| S17-final-viral-combined_k141_88583  | [Full] | 5243   | No  | NA | 0     | 0  | Low-quality    | Genome-fragment | NA              | 12.12 |
| S4-final-viral-combined_k141_143826  | [Full] | 2813   | No  | NA | 0     | 2  | Not-determined | Genome-fragment | NA              | 0     |
| S4-final-viral-combined_k141_32302   | [Full] | 3220   | No  | NA | 0     | 2  | Not-determined | Genome-fragment | NA              | 0     |
| S4-final-viral-combined_k141_121996  | [Full] | 2818   | No  | NA | 0     | 1  | Not-determined | Genome-fragment | NA              | 0     |
| S4-final-viral-combined_k141_25128   | [Full] | 1608   | No  | NA | 0     | 0  | Not-determined | Genome-fragment | NA              | 0     |
| S11-final-viral-combined_k141_180522 | [Full] | 5244   | No  | NA | 3     | 0  | Low-quality    | Genome-fragment | NA              | 13.48 |
| S4-final-viral-combined_k141_101622  | [Full] | 1083   | No  | NA | 0     | 2  | Not-determined | Genome-fragment | NA              | 0     |
| S2-final-viral-combined_k141_20603   | [Full] | 5244   | No  | NA | 0     | 3  | Low-quality    | Genome-fragment | NA              | 3.59  |
| S2-final-viral-combined_k141_32703   | [Full] | 5244   | No  | NA | 0     | 1  | Low-quality    | Genome-fragment | NA              | 8.5   |
| S2_k141_185331                       |        | 5244   | No  | NA | 0     | 1  | Low-quality    | Genome-fragment | NA              | 10.88 |
| S7_k141_51856                        |        | 5247   | Yes | NA | 3914  | 1  | 2              | Low-quality     | Genome-fragment | 6.3   |
| S4-final-viral-combined_k141_115463  | [Full] | 1595   | No  | NA | 0     | 1  | Not-determined | Genome-fragment | NA              | 25.4  |
| S12_k141_169861                      |        | 5247   | No  | NA | 0     | 0  | Low-quality    | Genome-fragment | NA              | 0     |
| S6-final-viral-combined_k141_100776  | [Full] | 5247   | No  | NA | 0     | 0  | Low-quality    | Genome-fragment | NA              | 2.87  |
| S4-final-viral-combined_k141_15621   | [Full] | 5249   | No  | NA | 0     | 0  | Low-quality    | Genome-fragment | NA              | 6.52  |
| S4-final-viral-combined_k141_11347   | [Full] | 1888   | No  | NA | 0     | 2  | Not-determined | Genome-fragment | NA              | 3.53  |
| S4-final-viral-combined_k141_59787   | [Full] | 2533   | No  | NA | 0     | 0  | Not-determined | Genome-fragment | NA              | 0     |
| S4-final-viral-combined_k141_88945   | [Full] | 1661   | No  | NA | 0     |    |                |                 |                 |       |



|                                      |        |       |     |      |   |    |                |                 |    |       |       |
|--------------------------------------|--------|-------|-----|------|---|----|----------------|-----------------|----|-------|-------|
| 54-final-viral-combined_k141_815331  | [full] | 2873  | No  | NA   | 0 | 3  | Not-determined | Genome-fragment | NA | 0     | 0     |
| 54-final-viral-combined_k141_115646  | [full] | 2029  | No  | NA   | 0 | 0  | Not-determined | Genome-fragment | NA | 0     | 0     |
| 54_k141_104765                       |        | 5270  | No  | NA   | 0 | 5  | Low-quality    | Genome-fragment | NA | 2.35  | 0     |
| 54-final-viral-combined_k141_59948   | [full] | 35193 | No  | NA   | 0 | 18 | Not-determined | Genome-fragment | NA | 0     | 0     |
| 512-final-viral-combined_k141_169455 | [full] | 5271  | No  | NA   | 4 | 0  | Low-quality    | Genome-fragment | NA | 11.15 | 0     |
| 54-final-viral-combined_k141_39139   | [full] | 2123  | No  | NA   | 0 | 1  | Not-determined | Genome-fragment | NA | 0     | 0     |
| 54-final-viral-combined_k141_164636  | [full] | 2745  | No  | NA   | 0 | 1  | Not-determined | Genome-fragment | NA | 0     | 0     |
| 54-final-viral-combined_k141_115676  | [full] | 1188  | No  | NA   | 0 | 1  | Not-determined | Genome-fragment | NA | 0     | 0     |
| 54-final-viral-combined_k141_32549   | [full] | 2728  | No  | NA   | 0 | 0  | Not-determined | Genome-fragment | NA | 0     | 0     |
| 54-final-viral-combined_k141_52635   | [full] | 5000  | No  | NA   | 0 | 4  | Not-determined | Genome-fragment | NA | 0     | 0     |
| 52_k141_20375                        |        | 5273  | No  | NA   | 4 | 0  | Low-quality    | Genome-fragment | NA | 3.68  | 0     |
| 54-final-viral-combined_k141_59972   | [full] | 2540  | No  | NA   | 0 | 1  | Not-determined | Genome-fragment | NA | 0     | 0     |
| 54-final-viral-combined_k141_25356   | [full] | 1397  | No  | NA   | 0 | 0  | Not-determined | Genome-fragment | NA | 0     | 0     |
| 511_k141_34666                       |        | 5274  | No  | NA   | 0 | 0  | Low-quality    | Genome-fragment | NA | 11.51 | 0     |
| 51-final-viral-combined_k141_211508  | [full] | 5274  | No  | NA   | 0 | 2  | Low-quality    | Genome-fragment | NA | 1.74  | 0     |
| 54-final-viral-combined_k141_12720   | [full] | 2755  | No  | NA   | 2 | 0  | Not-determined | Genome-fragment | NA | 0     | 0     |
| 54-final-viral-combined_k141_39175   | [full] | 1142  | No  | NA   | 0 | 1  | Not-determined | Genome-fragment | NA | 0     | 0     |
| 54-final-viral-combined_k141_115717  | [full] | 1161  | No  | NA   | 0 | 0  | Not-determined | Genome-fragment | NA | 0     | 0     |
| 57-final-viral-combined_k141_187919  | [full] | 5274  | No  | NA   | 0 | 0  | Low-quality    | Genome-fragment | NA | 12.3  | 0     |
| 512-final-viral-combined_k141_386572 | [full] | 5274  | No  | NA   | 0 | 4  | Low-quality    | Genome-fragment | NA | 12.19 | 0     |
| 51-final-viral-combined_k141_367301  | [full] | 5275  | Yes | 4308 | 1 | 1  | Low-quality    | Genome-fragment | NA | 3.3   | 18.33 |
| 54-final-viral-combined_k141_177501  | [full] | 2657  | No  | NA   | 0 | 7  | Not-determined | Genome-fragment | NA | 0     | 0     |
| 54-final-viral-combined_k141_109403  | [full] | 1544  | No  | NA   | 0 | 0  | Not-determined | Genome-fragment | NA | 0     | 0     |
| 54-final-viral-combined_k141_44931   | [full] | 2214  | No  | NA   | 0 | 1  | Not-determined | Genome-fragment | NA | 0     | 0     |
| 54-final-viral-combined_k141_144115  | [full] | 3517  | No  | NA   | 0 | 3  | Not-determined | Genome-fragment | NA | 0     | 0     |
| 512-final-viral-combined_k141_140039 | [full] | 5275  | No  | NA   | 0 | 1  | Low-quality    | Genome-fragment | NA | 11.22 | 0     |
| 54-final-viral-combined_k141_101945  | [full] | 2653  | No  | NA   | 0 | 2  | Not-determined | Genome-fragment | NA | 0     | 0     |
| 54-final-viral-combined_k141_46634   | [full] | 1165  | No  | NA   | 0 | 0  | Not-determined | Genome-fragment | NA | 0     | 0     |
| 54-final-viral-combined_k141_129778  | [full] | 4079  | No  | NA   | 0 | 2  | Not-determined | Genome-fragment | NA | 0     | 0     |
| 511_k141_87185                       |        | 5276  | Yes | 3661 | 1 | 1  | Low-quality    | Genome-fragment | NA | 9.08  | 30.61 |
| 54-final-viral-combined_k141_52731   | [full] | 2755  | No  | NA   | 0 | 2  | Not-determined | Genome-fragment | NA | 0     | 0     |
| 54-final-viral-combined_k141_115761  | [full] | 1332  | No  | NA   | 0 | 1  | Not-determined | Genome-fragment | NA | 0     | 0     |
| 54-final-viral-combined_k141_39236   | [full] | 2389  | No  | NA   | 0 | 0  | Not-determined | Genome-fragment | NA | 0     | 0     |
| 54-final-viral-combined_k141_95173   | [full] | 3283  | No  | NA   | 0 | 2  | Not-determined | Genome-fragment | NA | 0     | 0     |
| 54-final-viral-combined_k141_136943  | [full] | 2758  | No  | NA   | 0 | 1  | Not-determined | Genome-fragment | NA | 0     | 0     |
| 54-final-viral-combined_k141_115781  | [full] | 2027  | No  | NA   | 0 | 1  | Not-determined | Genome-fragment | NA | 0     | 0     |
| 54-final-viral-combined_k141_150777  | [full] | 2261  | No  | NA   | 0 | 1  | Not-determined | Genome-fragment | NA | 0     | 0     |
| 54-final-viral-combined_k141_2628    | [full] | 6351  | No  | NA   | 0 | 5  | Not-determined | Genome-fragment | NA | 0     | 0     |
| 54-final-viral-combined_k141_88132   | [full] | 2516  | No  | NA   | 0 | 1  | Not-determined | Genome-fragment | NA | 0     | 0     |
| 58_k141_47877                        |        | 5276  | No  | NA   | 0 | 1  | Low-quality    | Genome-fragment | NA | 3.84  | 0     |
| 55-final-viral-combined_k141_207484  | [full] | 5279  | Yes | 3906 | 1 | 1  | Low-quality    | Genome-fragment | NA | 9.71  | 26.01 |
| 55-final-viral-combined_k141_156754  | [full] | 5279  | No  | NA   | 0 | 0  | Low-quality    | Genome-fragment | NA | 10.24 | 0     |
| 511-final-viral-combined_k141_302875 | [full] | 5281  | No  | NA   | 1 | 0  | Low-quality    | Genome-fragment | NA | 8.77  | 0     |
| 54-final-viral-combined_k141_102007  | [full] | 7038  | No  | NA   | 0 | 3  | Not-determined | Genome-fragment | NA | 0     | 0     |
| 54-final-viral-combined_k141_115830  | [full] | 2019  | No  | NA   | 0 | 1  | Not-determined | Genome-fragment | NA | 0     | 0     |
| 57-final-viral-combined_k141_177401  | [full] | 5284  | No  | NA   | 3 | 0  | Low-quality    | Genome-fragment | NA | 12.04 | 0     |
| 54-final-viral-combined_k141_109474  | [full] | 1292  | No  | NA   | 0 | 0  | Not-determined | Genome-fragment | NA | 0     | 0     |
| 54-final-viral-combined_k141_115839  | [full] | 1713  | No  | NA   | 0 | 2  | Not-determined | Genome-fragment | NA | 0     | 0     |
| 54-final-viral-combined_k141_164551  | [full] | 5284  | No  | NA   | 0 | 1  | Low-quality    | Genome-fragment | NA | 5.24  | 0     |
| 56-final-viral-combined_k141_40277   | [full] | 5284  | Yes | 5030 | 4 | 1  | Low-quality    | Genome-fragment | NA | 8.35  | 4.81  |
| 54-final-viral-combined_k141_88180   | [full] | 2259  | No  | NA   | 0 | 2  | Not-determined | Genome-fragment | NA | 0     | 0     |
| 54-final-viral-combined_k141_60148   | [full] | 4800  | No  | NA   | 0 | 1  | Not-determined | Genome-fragment | NA | 0     | 0     |
| 511-final-viral-combined_k141_10435  | [full] | 5285  | No  | NA   | 0 | 1  | Low-quality    | Genome-fragment | NA | 8.29  | 0     |
| 512-final-viral-combined_k141_351914 | [full] | 5285  | No  | NA   | 0 | 3  | Low-quality    | Genome-fragment | NA | 2.55  | 0     |
| 58-final-viral-combined_k141_38007   | [full] | 5285  | No  | NA   | 3 | 0  | Low-quality    | Genome-fragment | NA | 6.69  | 0     |
| 511-final-viral-combined_k141_45866  | [full] | 5286  | No  | NA   | 0 | 1  | Low-quality    | Genome-fragment | NA | 8.12  | 0     |
| 54-final-viral-combined_k141_158084  | [full] | 2170  | No  | NA   | 0 | 0  | Not-determined | Genome-fragment | NA | 0     | 0     |
| 54-final-viral-combined_k141_61774   | [full] | 1185  | No  | NA   | 0 | 1  | Not-determined | Genome-fragment | NA | 0     | 0     |
| 54-final-viral-combined_k141_60100   | [full] | 2219  | No  | NA   | 0 | 1  | Not-determined | Genome-fragment | NA | 0     | 0     |
| 511-final-viral-combined_k141_87721  | [full] | 5286  | No  | NA   | 3 | 0  | Low-quality    | Genome-fragment | NA | 11.45 | 0     |
| 517-final-viral-combined_k141_151748 | [full] | 5286  | No  | NA   | 0 | 2  | Low-quality    | Genome-fragment | NA | 8.86  | 0     |
| 54-final-viral-combined_k141_150907  | [full] | 2258  | No  | NA   | 0 | 1  | Not-determined | Genome-fragment | NA | 0     | 0     |
| 54-final-viral-combined_k141_74630   | [full] | 1848  | No  | NA   | 0 | 0  | Not-determined | Genome-fragment | NA | 0     | 0     |
| 54-final-viral-combined_k141_88262   | [full] | 2072  | No  | NA   | 0 | 2  | Not-determined | Genome-fragment | NA | 0     | 0     |
| 512-final-viral-combined_k141_48466  | [full] | 5288  | No  | NA   | 0 | 5  | Low-quality    | Genome-fragment | NA | 1.56  | 0     |
| 54-final-viral-combined_k141_11854   | [full] | 2255  | No  | NA   | 0 | 1  | Not-determined | Genome-fragment | NA | 0     | 0     |
| 54-final-viral-combined_k141_144304  | [full] | 1073  | No  | NA   | 0 | 0  | Not-determined | Genome-fragment | NA | 0     | 0     |
| 54-final-viral-combined_k141_102069  | [full] | 2938  | No  | NA   | 0 | 2  | Not-determined | Genome-fragment | NA | 0     | 0     |
| 59-final-viral-combined_k141_104791  | [full] | 5290  | No  | NA   | 0 | 0  | Low-quality    | Genome-fragment | NA | 12.47 | 0     |
| 57-final-viral-combined_k141_217731  | [full] | 5290  | No  | NA   | 3 | 0  | Low-quality    | Genome-fragment | NA | 14.81 | 0     |
| 54-final-viral-combined_k141_109638  | [full] | 1977  | No  | NA   | 0 | 3  | Not-determined | Genome-fragment | NA | 4.32  | 0     |
| 58-final-viral-combined_k141_157183  | [full] | 5290  | No  | NA   | 0 | 5  | Low-quality    | Genome-fragment | NA | 0     | 0     |
| 54-final-viral-combined_k141_81863   | [full] | 2816  | No  | NA   | 0 | 1  | Not-determined | Genome-fragment | NA | 0     | 0     |
| 511_k141_9258                        |        | 5291  | No  | NA   | 0 | 2  | Low-quality    | Genome-fragment | NA | 2.75  | 0     |
| 54-final-viral-combined_k141_25627   | [full] | 2406  | No  | NA   | 0 | 1  | Not-determined | Genome-fragment | NA | 0     | 0     |
| 54-final-viral-combined_k141_164909  | [full] | 1958  | No  | NA   | 0 | 1  | Not-determined | Genome-fragment | NA | 0     | 0     |
| 56_k141_119373                       |        | 5292  | No  | NA   | 0 | 4  | Low-quality    | Genome-fragment | NA | 6.81  | 0     |
| 54-final-viral-combined_k141_116051  | [full] | 1012  | No  | NA   | 0 | 0  | Not-determined | Genome-fragment | NA | 0     | 0     |
| 54-final-viral-combined_k141_122225  | [full] | 1900  | No  | NA   | 0 | 0  | Not-determined | Genome-fragment | NA | 0     | 0     |
| 54-final-viral-combined_k141_151007  | [full] | 2204  | No  | NA   | 0 | 3  | Not-determined | Genome-fragment | NA | 0     | 0     |
| 54-final-viral-combined_k141_144342  | [full] | 9681  | No  | NA   | 0 | 5  | Not-determined | Genome-fragment | NA | 0     | 0     |
| 54-final-viral-combined_k141_109677  | [full] | 10614 | No  | NA   | 0 | 1  | Not-determined | Genome-fragment | NA | 0     | 0     |
| 54-final-viral-combined_k141_11895   | [full] | 1238  | No  | NA   | 0 | 2  | Not-determined | Genome-fragment | NA | 0     | 0     |
| 54-final-viral-combined_k141_46783   | [full] | 4920  | No  | NA   | 0 | 3  | Not-determined | Genome-fragment | NA | 0     | 0     |
| 57-final-viral-combined_k141_200081  | [full] | 5297  | No  | NA   | 0 | 0  | Low-quality    | Genome-fragment | NA | 6.01  | 0     |
| 511-final-viral-combined_k141_295242 | [full] | 5298  | No  | NA   | 0 | 0  | Low-quality    | Genome-fragment | NA | 11.28 | 0     |
| 54-final-viral-combined_k141_158205  | [full] | 1511  | No  | NA   | 0 | 2  | Not-determined | Genome-fragment | NA | 0     | 0     |
| 54-final-viral-combined_k141_122555  | [full] | 2031  | No  | NA   | 0 | 2  | Not-determined | Genome-fragment | NA | 0     | 0     |
| 512_k141_394185                      |        | 5298  | No  | NA   | 0 | 1  | Low-quality    | Genome-fragment | NA | 18.47 | 0     |
| 52-final-viral-combined_k141_252539  | [full] | 5298  | No  | NA   | 0 | 0  | Low-quality    | Genome-fragment | NA | 10.42 | 0     |
| 54-final-viral-combined_k141_46803   | [full] | 1317  | No  | NA   | 0 | 4  | Not-determined | Genome-fragment | NA | 2.88  | 0     |
| 517-final-viral-combined_k141_238722 | [full] | 5299  | No  | NA   | 0 | 1  | Low-quality    | Genome-fragment | NA | 7.95  | 0     |
| 54_k141_122773                       |        | 5300  | No  | NA   | 0 | 1  | Low-quality    | Genome-fragment | NA | 7.95  | 0     |
| 512_k141_203551                      |        | 5302  | No  | NA   | 1 | 0  | Low-quality    | Genome-fragment | NA | 12.44 | 0     |
| 54-final-viral-combined_k141_116057  | [full] | 1868  | No  | NA   | 0 | 1  | Not-determined | Genome-fragment | NA | 0.64  | 80.99 |
| 53_k141_65241                        |        | 5303  | Yes | 1008 | 1 | 2  | Low-quality    | Genome-fragment | NA | 0     | 0     |
| 54-final-viral-combined_k141_144395  | [full] | 1612  | No  | NA   | 0 | 1  | Not-determined | Genome-fragment | NA | 0     | 0     |
| 512-final-viral-combined_k141_374432 | [full] | 5303  | No  | NA   | 0 | 2  | Low-quality    | Genome-fragment | NA | 13.84 | 0     |
| 51-final-viral-combined_k141_169471  | [full] | 5310  | No  | NA   | 0 | 0  | Low-quality    | Genome-fragment | NA | 6.2   | 0     |
| 512-final-viral-combined_k141_85358  | [full] | 5310  | Yes | 4404 | 2 | 1  | Low-quality    | Genome-fragment | NA | 11.19 | 17.06 |
| 54-final-viral-combined_k141_144342  | [full] | 1990  | No  | NA   | 0 | 0  | Not-determined | Genome-fragment | NA | 0     | 0     |
| 54-final-viral-combined_k141_130066  | [full] | 2292  | No  | NA   | 0 | 1  | Not-determined | Genome-fragment | NA | 0     | 0     |
| 54-final-viral-combined_k141_46817   | [full] | 2704  | No  | NA   | 0 | 0  | Not-determined | Genome-fragment | NA | 0     | 0     |
| 57_k141_58244                        |        | 5312  | No  | NA   | 0 | 6  | Low-quality    | Genome-fragment | NA | 1.96  | 0     |
| 517-final-viral-combined_k141_254754 | [full] | 5312  | No  | NA   | 2 | 1  | Low-quality    | Genome-fragment | NA | 12.48 | 0     |
| 511-final-viral-combined_k141_891    | [full] | 5313  | No  | NA   | 8 | 0  | Low-quality    | Genome-fragment | NA | 8.4   | 0     |
| 54-final-viral-combined_k141_46849   | [full] | 1099  | No  | NA   | 0 | 1  | Not-determined | Genome-fragment | NA | 0     | 0     |
| 54-final-viral-combined_k141_158296  | [full] | 2661  | No  | NA   | 2 | 2  | Not-determined | Genome-fragment | NA | 0     | 0     |
| 55-final-viral-combined_k141_200314  | [full] | 5313  | No  | NA   | 0 | 1  | Low-quality    | Genome-fragment | NA | 12.75 | 0     |
| 54-final-viral-combined_k141_130109  | [full] | 2524  | No  | NA   | 0 | 1  | Not-determined | Genome-fragment | NA | 0     | 0     |
| 54-final-viral-combined_k141_25751   | [full] | 1450  | No  | NA   | 0 | 0  | Not-determined | Genome-fragment | NA | 0     | 0     |
| 54-final-viral-combined_k141_130081  | [full] | 1552  | No  | NA   | 0 | 1  | Not-determined | Genome-fragment | NA | 0     | 0     |
| 54-final-viral-combined_k141_18100   | [full] | 1151  | No  | NA   | 0 | 0  | Not-determined | Genome-fragment | NA | 0     | 0     |
| 54-final-viral-combined_k141_39521   | [full] | 1469  | No  | NA   | 0 | 1  | Not-determined | Genome-fragment | NA | 0     | 0     |
| 54-final-viral-combined_k141_39525   | [full] | 2656  | No  | NA   | 0 | 2  | Not-determined | Genome-fragment | NA | 0     | 0     |
| 54-final-viral-combined_k141_95493   | [full] | 5825  | No  | NA   | 0 | 5  | Not-determined | Genome-fragment | NA | 0     | 0     |
| 511_k141_149922                      |        | 5314  | No  | NA   | 1 | 0  | Low-quality    | Genome-fragment | NA | 1.3   | 0     |
| 517-final-viral-combined_k141_246054 | [full] | 5317  | No  | NA   | 4 | 0  | Low-quality    | Genome-fragment | NA | 13.61 | 0     |
| 511_k141_137228                      |        | 5318  | No  | NA   | 0 | 0  | Low-quality    | Genome-fragment | NA | 11.85 | 0     |
| 54-final-viral-combined_k141_53033   | [full] | 2280  | No  | NA   | 0 | 1  | Not-determined | Genome-fragment | NA | 0     | 0     |
| 54-final-viral-combined_k141_95505   | [full] | 1040  | No  | NA   | 0 | 1  | Not-determined | Genome-fragment | NA | 0     | 0     |



|                                      |        |      |     |      |   |   |                |                 |    |       |       |
|--------------------------------------|--------|------|-----|------|---|---|----------------|-----------------|----|-------|-------|
| 54-final-viral-combined_k141_396977  | [full] | 3026 | No  | NA   | 0 | 1 | Not-determined | Genome-fragment | NA | 0     | 0     |
| 54-final-viral-combined_k141_396999  | [full] | 1340 | No  | NA   | 0 | 1 | Not-determined | Genome-fragment | NA | 0     | 0     |
| S8_k141_92737                        |        | 5338 | No  | NA   | 0 | 5 | Low-quality    | Genome-fragment | NA | 2.51  | 0     |
| 54-final-viral-combined_k141_53252   | [full] | 5411 | No  | NA   | 0 | 4 | Not-determined | Genome-fragment | NA | 0     | 0     |
| S2_k141_189350                       |        | 5340 | No  | NA   | 0 | 4 | Low-quality    | Genome-fragment | NA | 10.54 | 0     |
| S1-final-viral-combined_k141_89851   | [full] | 5342 | No  | NA   | 0 | 0 | Low-quality    | Genome-fragment | NA | 12.95 | 0     |
| 54-final-viral-combined_k141_122866  | [full] | 2827 | No  | NA   | 0 | 2 | Not-determined | Genome-fragment | NA | 0     | 0     |
| 54-final-viral-combined_k141_165320  | [full] | 8660 | No  | NA   | 0 | 6 | Not-determined | Genome-fragment | NA | 0     | 0     |
| 54-final-viral-combined_k141_158463  | [full] | 5607 | No  | NA   | 0 | 1 | Not-determined | Genome-fragment | NA | 0     | 0     |
| 54-final-viral-combined_k141_88641   | [full] | 1731 | No  | NA   | 0 | 0 | Not-determined | Genome-fragment | NA | 0     | 0     |
| 54-final-viral-combined_k141_39721   | [full] | 2311 | No  | NA   | 0 | 2 | Not-determined | Genome-fragment | NA | 0     | 0     |
| S17-final-viral-combined_k141_22564  | [full] | 5343 | No  | NA   | 0 | 6 | Low-quality    | Genome-fragment | NA | 10.1  | 0     |
| S1-final-viral-combined_k141_275459  | [full] | 5344 | No  | NA   | 0 | 1 | Low-quality    | Genome-fragment | NA | 3.86  | 0     |
| S344                                 | No     | 5344 | No  | NA   | 1 | 0 | Low-quality    | Genome-fragment | NA | 8.09  | 0     |
| S12-final-viral-combined_k141_255883 | [full] | 5349 | No  | NA   | 1 | 0 | Low-quality    | Genome-fragment | NA | 9.64  | 0     |
| 54-final-viral-combined_k141_18439   | [full] | 3569 | No  | NA   | 0 | 1 | Not-determined | Genome-fragment | NA | 9.64  | 0     |
| 54-final-viral-combined_k141_12202   | [full] | 3262 | No  | NA   | 0 | 3 | Not-determined | Genome-fragment | NA | 0     | 0     |
| S12-final-viral-combined_k141_344653 | [full] | 5349 | No  | NA   | 0 | 2 | Low-quality    | Genome-fragment | NA | 1.67  | 0     |
| 54-final-viral-combined_k141_110083  | [full] | 1887 | No  | NA   | 0 | 1 | Not-determined | Genome-fragment | NA | 0     | 0     |
| 54-final-viral-combined_k141_26048   | [full] | 7625 | No  | NA   | 0 | 2 | Not-determined | Genome-fragment | NA | 0     | 0     |
| S2-final-viral-combined_k141_206749  | [full] | 5350 | No  | NA   | 1 | 0 | Low-quality    | Genome-fragment | NA | 9.76  | 0     |
| 54-final-viral-combined_k141_144801  | [full] | 2027 | No  | NA   | 0 | 0 | Not-determined | Genome-fragment | NA | 0     | 0     |
| 54-final-viral-combined_k141_110097  | [full] | 1677 | No  | NA   | 0 | 1 | Not-determined | Genome-fragment | NA | 0     | 0     |
| S7-final-viral-combined_k141_78168   | [full] | 5353 | No  | NA   | 3 | 0 | Low-quality    | Genome-fragment | NA | 13.28 | 0     |
| S7_k141_178829                       |        | 5353 | No  | NA   | 2 | 0 | Low-quality    | Genome-fragment | NA | 13.36 | 0     |
| 54-final-viral-combined_k141_53319   | [full] | 1848 | No  | NA   | 0 | 1 | Not-determined | Genome-fragment | NA | 0     | 0     |
| 54-final-viral-combined_k141_33150   | [full] | 1171 | No  | NA   | 0 | 0 | Not-determined | Genome-fragment | NA | 0     | 0     |
| 54-final-viral-combined_k141_75086   | [full] | 2999 | No  | NA   | 0 | 1 | Not-determined | Genome-fragment | NA | 0     | 0     |
| 54-final-viral-combined_k141_18480   | [full] | 2043 | No  | NA   | 0 | 2 | Not-determined | Genome-fragment | NA | 0     | 0     |
| S1-final-viral-combined_k141_87910   | [full] | 5354 | No  | NA   | 0 | 3 | Low-quality    | Genome-fragment | NA | 3.68  | 0     |
| 54-final-viral-combined_k141_151388  | [full] | 1278 | No  | NA   | 0 | 0 | Not-determined | Genome-fragment | NA | 0     | 0     |
| 54-final-viral-combined_k141_82224   | [full] | 1516 | No  | NA   | 0 | 0 | Not-determined | Genome-fragment | NA | 0     | 0     |
| S12-final-viral-combined_k141_140471 | [full] | 5354 | No  | NA   | 0 | 0 | Low-quality    | Genome-fragment | NA | 4.31  | 0     |
| S8-final-viral-combined_k141_115710  | [full] | 5354 | Yes | 700  | 1 | 2 | Low-quality    | Genome-fragment | NA | 0.47  | 86.93 |
| 54-final-viral-combined_k141_110343  | [full] | 2271 | No  | NA   | 0 | 3 | Not-determined | Genome-fragment | NA | 0     | 0     |
| 54-final-viral-combined_k141_398516  | [full] | 1966 | No  | NA   | 0 | 1 | Not-determined | Genome-fragment | NA | 0     | 0     |
| 54-final-viral-combined_k141_18506   | [full] | 5505 | No  | NA   | 0 | 2 | Not-determined | Genome-fragment | NA | 0     | 0     |
| S2-final-viral-combined_k141_241591  | [full] | 5355 | No  | NA   | 2 | 0 | Low-quality    | Genome-fragment | NA | 15.03 | 0     |
| S1-final-viral-combined_k141_100721  | [full] | 5359 | No  | NA   | 0 | 5 | Low-quality    | Genome-fragment | NA | 3.8   | 0     |
| 54-final-viral-combined_k141_82241   | [full] | 1046 | No  | NA   | 0 | 1 | Not-determined | Genome-fragment | NA | 0     | 0     |
| 54-final-viral-combined_k141_151432  | [full] | 2543 | No  | NA   | 0 | 1 | Not-determined | Genome-fragment | NA | 0     | 0     |
| S2_k141_151474                       |        | 5359 | No  | NA   | 0 | 2 | Low-quality    | Genome-fragment | NA | 5.73  | 0     |
| 54-final-viral-combined_k141_144863  | [full] | 1600 | No  | NA   | 0 | 2 | Not-determined | Genome-fragment | NA | 0     | 0     |
| 54-final-viral-combined_k141_151446  | [full] | 1111 | No  | NA   | 0 | 1 | Not-determined | Genome-fragment | NA | 0     | 0     |
| S7-final-viral-combined_k141_14215   | [full] | 5361 | Yes | 2074 | 1 | 1 | Low-quality    | Genome-fragment | NA | 2.99  | 61.31 |
| 54-final-viral-combined_k141_16340   | [full] | 4585 | No  | NA   | 0 | 1 | Not-determined | Genome-fragment | NA | 0     | 0     |
| 54-final-viral-combined_k141_5096    | [full] | 1735 | No  | NA   | 0 | 2 | Not-determined | Genome-fragment | NA | 0     | 0     |
| 54-final-viral-combined_k141_75154   | [full] | 2748 | No  | NA   | 0 | 0 | Not-determined | Genome-fragment | NA | 0     | 0     |
| 54-final-viral-combined_k141_82279   | [full] | 1545 | No  | NA   | 0 | 0 | Not-determined | Genome-fragment | NA | 0     | 0     |
| 54-final-viral-combined_k141_47213   | [full] | 4074 | No  | NA   | 0 | 2 | Not-determined | Genome-fragment | NA | 0     | 0     |
| 54-final-viral-combined_k141_3246    | [full] | 2939 | No  | NA   | 0 | 0 | Not-determined | Genome-fragment | NA | 0     | 0     |
| 54-final-viral-combined_k141_151465  | [full] | 2148 | No  | NA   | 0 | 2 | Not-determined | Genome-fragment | NA | 0     | 0     |
| 54-final-viral-combined_k141_5102    | [full] | 1596 | No  | NA   | 0 | 0 | Not-determined | Genome-fragment | NA | 0     | 0     |
| 54-final-viral-combined_k141_82284   | [full] | 5729 | No  | NA   | 0 | 6 | Not-determined | Genome-fragment | NA | 0     | 0     |
| S7-final-viral-combined_k141_218757  | [full] | 5362 | Yes | 2104 | 1 | 1 | Low-quality    | Genome-fragment | NA | 0.97  | 60.76 |
| 54-final-viral-combined_k141_18882   | [full] | 2799 | No  | NA   | 0 | 0 | Not-determined | Genome-fragment | NA | 0     | 0     |
| 54-final-viral-combined_k141_82299   | [full] | 1328 | No  | NA   | 0 | 2 | Not-determined | Genome-fragment | NA | 0     | 0     |
| 54-final-viral-combined_k141_53447   | [full] | 2749 | No  | NA   | 0 | 1 | Not-determined | Genome-fragment | NA | 0     | 0     |
| 54-final-viral-combined_k141_95964   | [full] | 1301 | No  | NA   | 0 | 1 | Not-determined | Genome-fragment | NA | 0     | 0     |
| S17-final-viral-combined_k141_122469 | [full] | 5364 | No  | NA   | 9 | 0 | Low-quality    | Genome-fragment | NA | 16.7  | 0     |
| 54-final-viral-combined_k141_137534  | [full] | 1364 | No  | NA   | 0 | 1 | Not-determined | Genome-fragment | NA | 0     | 0     |
| 54-final-viral-combined_k141_68138   | [full] | 1407 | No  | NA   | 0 | 0 | Not-determined | Genome-fragment | NA | 0     | 0     |
| 54-final-viral-combined_k141_110268  | [full] | 3163 | No  | NA   | 0 | 3 | Not-determined | Genome-fragment | NA | 0     | 0     |
| 54-final-viral-combined_k141_47260   | [full] | 1492 | No  | NA   | 0 | 2 | Not-determined | Genome-fragment | NA | 0     | 0     |
| S2-final-viral-combined_k141_26267   | [full] | 5364 | No  | NA   | 1 | 0 | Low-quality    | Genome-fragment | NA | 8.48  | 0     |
| S2-final-viral-combined_k141_212466  | [full] | 5365 | No  | NA   | 0 | 2 | Low-quality    | Genome-fragment | NA | 8.88  | 0     |
| 54-final-viral-combined_k141_75237   | [full] | 4661 | No  | NA   | 0 | 4 | Not-determined | Genome-fragment | NA | 1.68  | 0     |
| S2-final-viral-combined_k141_217239  | [full] | 5365 | No  | NA   | 0 | 3 | Low-quality    | Genome-fragment | NA | 6.95  | 0     |
| S1-final-viral-combined_k141_288519  | [full] | 5366 | No  | NA   | 0 | 1 | Not-determined | Genome-fragment | NA | 0     | 0     |
| 54-final-viral-combined_k141_110295  | [full] | 2390 | No  | NA   | 0 | 1 | Not-determined | Genome-fragment | NA | 0     | 0     |
| 54-final-viral-combined_k141_88855   | [full] | 4034 | No  | NA   | 0 | 1 | Not-determined | Genome-fragment | NA | 7.18  | 0     |
| S1_k141_298881                       |        | 5366 | No  | NA   | 0 | 2 | Low-quality    | Genome-fragment | NA | 7.18  | 0     |
| S7-final-viral-combined_k141_100585  | [full] | 5367 | No  | NA   | 0 | 3 | Low-quality    | Genome-fragment | NA | 3.78  | 0     |
| 54-final-viral-combined_k141_137570  | [full] | 5683 | No  | NA   | 0 | 4 | Not-determined | Genome-fragment | NA | 0     | 0     |
| S8-final-viral-combined_k141_100404  | [full] | 5368 | No  | NA   | 0 | 0 | Low-quality    | Genome-fragment | NA | 11.78 | 0     |
| S11-final-viral-combined_k141_281622 | [full] | 5369 | No  | NA   | 2 | 0 | Low-quality    | Genome-fragment | NA | 12.08 | 0     |
| 54-final-viral-combined_k141_33350   | [full] | 2411 | No  | NA   | 0 | 2 | Not-determined | Genome-fragment | NA | 0     | 0     |
| 54-final-viral-combined_k141_144981  | [full] | 2358 | No  | NA   | 0 | 1 | Not-determined | Genome-fragment | NA | 0     | 0     |
| 54-final-viral-combined_k141_124516  | [full] | 2464 | No  | NA   | 0 | 0 | Not-determined | Genome-fragment | NA | 0     | 0     |
| S11-final-viral-combined_k141_127282 | [full] | 5370 | No  | NA   | 0 | 3 | Low-quality    | Genome-fragment | NA | 4.8   | 0     |
| 54-final-viral-combined_k141_18696   | [full] | 6151 | No  | NA   | 0 | 3 | Not-determined | Genome-fragment | NA | 8.2   | 0     |
| S8-final-viral-combined_k141_145101  | [full] | 5371 | No  | NA   | 0 | 1 | Low-quality    | Genome-fragment | NA | 2.17  | 43.6  |
| S12-final-viral-combined_k141_142527 | [full] | 5376 | Yes | 3032 | 2 | 2 | Low-quality    | Genome-fragment | NA | 2.17  | 43.6  |
| 54-final-viral-combined_k141_130632  | [full] | 4415 | No  | NA   | 0 | 3 | Not-determined | Genome-fragment | NA | 11.33 | 0     |
| S1-final-viral-combined_k141_254765  | [full] | 5380 | No  | NA   | 0 | 2 | Low-quality    | Genome-fragment | NA | 0     | 0     |
| 54-final-viral-combined_k141_82367   | [full] | 2074 | No  | NA   | 0 | 1 | Not-determined | Genome-fragment | NA | 0     | 0     |
| 54-final-viral-combined_k141_137650  | [full] | 1208 | No  | NA   | 0 | 2 | Not-determined | Genome-fragment | NA | 0     | 0     |
| S2-final-viral-combined_k141_263524  | [full] | 5382 | No  | NA   | 0 | 2 | Low-quality    | Genome-fragment | NA | 6.88  | 0     |
| 54-final-viral-combined_k141_6827    | [full] | 1029 | No  | NA   | 0 | 0 | Not-determined | Genome-fragment | NA | 1.43  | 0     |
| S12_k141_333860                      |        | 5383 | No  | NA   | 0 | 3 | Low-quality    | Genome-fragment | NA | 1.43  | 0     |
| S5-final-viral-combined_k141_109547  | [full] | 5385 | No  | NA   | 2 | 0 | Low-quality    | Genome-fragment | NA | 3.94  | 0     |
| 54-final-viral-combined_k141_335502  | [full] | 1148 | No  | NA   | 0 | 1 | Not-determined | Genome-fragment | NA | 0     | 0     |
| S12-final-viral-combined_k141_40637  | [full] | 5385 | Yes | 2169 | 4 | 4 | Low-quality    | Genome-fragment | NA | 5.53  | 59.72 |
| 54-final-viral-combined_k141_57301   | [full] | 5385 | No  | NA   | 2 | 0 | Low-quality    | Genome-fragment | NA | 12.32 | 0     |
| 54-final-viral-combined_k141_26308   | [full] | 2049 | No  | NA   | 0 | 2 | Not-determined | Genome-fragment | NA | 0     | 0     |
| 54-final-viral-combined_k141_33424   | [full] | 5217 | No  | NA   | 0 | 4 | Not-determined | Genome-fragment | NA | 0     | 0     |
| 54-final-viral-combined_k141_110429  | [full] | 3755 | No  | NA   | 0 | 3 | Not-determined | Genome-fragment | NA | 0     | 0     |
| S12-final-viral-combined_k141_140676 | [full] | 5389 | No  | NA   | 0 | 1 | Low-quality    | Genome-fragment | NA | 3.74  | 0     |
| 54-final-viral-combined_k141_17161   | [full] | 5390 | No  | NA   | 0 | 1 | Low-quality    | Genome-fragment | NA | 3.12  | 0     |
| S11-final-viral-combined_k141_180682 | [full] | 5391 | No  | NA   | 2 | 0 | Low-quality    | Genome-fragment | NA | 8.98  | 0     |
| 54-final-viral-combined_k141_130698  | [full] | 2641 | No  | NA   | 0 | 0 | Not-determined | Genome-fragment | NA | 2.43  | 0     |
| S2_k141_151850                       |        | 5392 | No  | NA   | 0 | 2 | Low-quality    | Genome-fragment | NA | 0     | 0     |
| 54-final-viral-combined_k141_68324   | [full] | 2388 | No  | NA   | 0 | 2 | Not-determined | Genome-fragment | NA | 0     | 0     |
| 54-final-viral-combined_k141_116745  | [full] | 1286 | No  | NA   | 0 | 0 | Not-determined | Genome-fragment | NA | 0     | 0     |
| 54-final-viral-combined_k141_136545  | [full] | 1615 | No  | NA   | 0 | 0 | Not-determined | Genome-fragment | NA | 0     | 0     |
| S12-final-viral-combined_k141_117595 | [full] | 5393 | Yes | 1891 | 1 | 1 | Low-quality    | Genome-fragment | NA | 0.72  | 64.94 |
| 54-final-viral-combined_k141_137737  | [full] | 1805 | No  | NA   | 0 | 1 | Not-determined | Genome-fragment | NA | 0     | 0     |
| 54-final-viral-combined_k141_123285  | [full] | 1445 | No  | NA   | 0 | 1 | Not-determined | Genome-fragment | NA | 0     | 0     |
| 54-final-viral-combined_k141_13630   | [full] | 1984 | No  | NA   | 0 | 0 | Not-determined | Genome-fragment | NA | 0     | 0     |
| 54-final-viral-combined_k141_33512   | [full] | 2287 | No  | NA   | 0 | 1 | Not-determined | Genome-fragment | NA | 0     | 0     |
| 54-final-viral-combined_k141_130742  | [full] | 2070 | No  | NA   | 0 | 0 | Not-determined | Genome-fragment | NA | 3.74  | 0     |
| S12-final-viral-combined_k141_336341 | [full] | 5395 | No  | NA   | 0 | 1 | Low-quality    | Genome-fragment | NA | 30.74 | 0     |
| S8-final-viral-combined_k141_230948  | [full] | 5396 | No  | NA   | 0 | 3 | Low-quality    | Genome-fragment | NA | 13.08 | 0     |
| S9-final-viral-combined_k141_79434   | [full] | 5399 | No  | NA   | 0 | 0 | Low-quality    | Genome-fragment | NA | 9.75  | 0     |
| S7-final-viral-combined_k141_76287   | [full] | 5404 | No  | NA   | 0 | 2 | Low-quality    | Genome-fragment | NA | 1.46  | 0     |
| S2_k141_144682                       |        | 5404 | No  | NA   | 0 | 1 | Not-determined | Genome-fragment | NA | 13.55 | 0     |
| 54-final-viral-combined_k141_47479   | [full] | 1600 | No  | NA   | 0 | 0 | Low-quality    | Genome-fragment | NA | 0     | 0     |
| S9-final-viral-combined_k141_23968   | [full] | 5405 | No  | NA   | 8 | 0 | Not-determined | Genome-fragment | NA | 10.54 | 0     |
| 54-final-viral-combined_k141_60984   | [full] | 1349 | No  | NA   | 0 | 2 | Not-determined | Genome-fragment | NA | 0     | 0     |
| 54-final-viral-combined_k141_26463   | [full] | 1582 | No  | NA   | 0 | 2 | Low-quality    | Genome-fragment | NA | 0     | 0     |
| S5-final-viral-combined_k141_167983  | [full] | 5405 | No  | NA   | 0 | 2 | Low-quality    | Genome-fragment | NA | 5.72  | 0     |
| 54-final-viral-comb                  |        |      |     |      |   |   |                |                 |    |       |       |



|                                      |        |      |     |      |   |   |                |                 |    |       |       |
|--------------------------------------|--------|------|-----|------|---|---|----------------|-----------------|----|-------|-------|
| S4-final-viral-combined_k141_1107251 | [full] | 1431 | No  | NA   | 0 | 0 | Not-determined | Genome-fragment | NA | 0     | 0     |
| S4-final-viral-combined_k141_128483  | [full] | 1856 | No  | NA   | 0 | 0 | Not-determined | Genome-fragment | NA | 0     | 0     |
| S11-final-viral-combined_k141_74017  | [full] | 5437 | No  | NA   | 1 | 0 | Low-quality    | Genome-fragment | NA | 11.4  | 0     |
| S4-final-viral-combined_k141_123563  | [full] | 2455 | No  | NA   | 0 | 3 | Not-determined | Genome-fragment | NA | 0     | 0     |
| S6_k141_48173                        | [full] | 5442 | No  | NA   | 1 | 0 | Low-quality    | Genome-fragment | NA | 9.01  | 0     |
| S4-final-viral-combined_k141_33764   | [full] | 9966 | No  | NA   | 0 | 0 | Not-determined | Genome-fragment | NA | 0     | 0     |
| S8_k141_86727                        | [full] | 5443 | No  | NA   | 3 | 0 | Low-quality    | Genome-fragment | NA | 12.27 | 0     |
| S4-final-viral-combined_k141_159325  | [full] | 1345 | No  | NA   | 0 | 1 | Not-determined | Genome-fragment | NA | 0     | 0     |
| S4-final-viral-combined_k141_47732   | [full] | 1152 | No  | NA   | 0 | 0 | Not-determined | Genome-fragment | NA | 0     | 0     |
| S3_k141_61289                        | [full] | 5444 | No  | NA   | 0 | 4 | Low-quality    | Genome-fragment | NA | 3.24  | 0     |
| S9_k141_122359                       | [full] | 5446 | No  | NA   | 3 | 0 | Low-quality    | Genome-fragment | NA | 13.11 | 0     |
| S4-final-viral-combined_k141_145500  | [full] | 4793 | No  | NA   | 0 | 2 | Not-determined | Genome-fragment | NA | 0     | 0     |
| S4-final-viral-combined_k141_165742  | [full] | 1279 | No  | NA   | 0 | 1 | Not-determined | Genome-fragment | NA | 0     | 0     |
| S4-final-viral-combined_k141_151985  | [full] | 1674 | No  | NA   | 0 | 0 | Not-determined | Genome-fragment | NA | 0     | 0     |
| S4-final-viral-combined_k141_12879   | [full] | 1893 | No  | NA   | 0 | 1 | Not-determined | Genome-fragment | NA | 0     | 0     |
| S4-final-viral-combined_k141_152002  | [full] | 1547 | No  | NA   | 0 | 0 | Not-determined | Genome-fragment | NA | 0     | 0     |
| S4-final-viral-combined_k141_89457   | [full] | 1217 | No  | NA   | 0 | 0 | Not-determined | Genome-fragment | NA | 0     | 0     |
| S4-final-viral-combined_k141_12881   | [full] | 2953 | No  | NA   | 0 | 2 | Not-determined | Genome-fragment | NA | 0     | 0     |
| S4-final-viral-combined_k141_145545  | [full] | 2047 | No  | NA   | 0 | 0 | Not-determined | Genome-fragment | NA | 0     | 0     |
| S4-final-viral-combined_k141_165768  | [full] | 1208 | No  | NA   | 0 | 1 | Not-determined | Genome-fragment | NA | 0     | 0     |
| S4-final-viral-combined_k141_53938   | [full] | 2643 | No  | NA   | 0 | 3 | Not-determined | Genome-fragment | NA | 0     | 0     |
| S17-final-viral-combined_k141_195621 | [full] | 5446 | No  | NA   | 0 | 2 | Low-quality    | Genome-fragment | NA | 14.64 | 0     |
| S3-final-viral-combined_k141_133056  | [full] | 5449 | No  | NA   | 0 | 1 | Low-quality    | Genome-fragment | NA | 9.79  | 0     |
| S4-final-viral-combined_k141_47792   | [full] | 2227 | No  | NA   | 0 | 0 | Not-determined | Genome-fragment | NA | 0     | 0     |
| S4-final-viral-combined_k141_82951   | [full] | 1514 | No  | NA   | 0 | 1 | Not-determined | Genome-fragment | NA | 0     | 0     |
| S2-final-viral-combined_k141_56794   | [full] | 5449 | No  | NA   | 0 | 0 | Low-quality    | Genome-fragment | NA | 9.07  | 0     |
| S4-final-viral-combined_k141_138056  | [full] | 1831 | No  | NA   | 0 | 1 | Not-determined | Genome-fragment | NA | 0     | 0     |
| S5_k141_86609                        | [full] | 5452 | No  | NA   | 0 | 0 | Low-quality    | Genome-fragment | NA | 6.06  | 0     |
| S4-final-viral-combined_k141_110887  | [full] | 1655 | No  | NA   | 0 | 2 | Not-determined | Genome-fragment | NA | 0     | 0     |
| S4-final-viral-combined_k141_103219  | [full] | 8948 | No  | NA   | 0 | 5 | Not-determined | Genome-fragment | NA | 0     | 0     |
| S4-final-viral-combined_k141_145609  | [full] | 3463 | No  | NA   | 0 | 2 | Not-determined | Genome-fragment | NA | 0     | 0     |
| S12-final-viral-combined_k141_192401 | [full] | 5452 | Yes | 2482 | 0 | 4 | Low-quality    | Genome-fragment | NA | 5.54  | 54.48 |
| S4-final-viral-combined_k141_75783   | [full] | 4650 | No  | NA   | 0 | 2 | Not-determined | Genome-fragment | NA | 0     | 0     |
| S2-final-viral-combined_k141_200575  | [full] | 5452 | Yes | 3194 | 1 | 1 | Low-quality    | Genome-fragment | NA | 2.92  | 41.42 |
| S4-final-viral-combined_k141_68792   | [full] | 1137 | No  | NA   | 0 | 1 | Not-determined | Genome-fragment | NA | 0     | 0     |
| S4-final-viral-combined_k141_83037   | [full] | 1024 | No  | NA   | 0 | 0 | Not-determined | Genome-fragment | NA | 0     | 0     |
| S4-final-viral-combined_k141_165814  | [full] | 3010 | No  | NA   | 0 | 2 | Not-determined | Genome-fragment | NA | 0     | 0     |
| S8-final-viral-combined_k141_199148  | [full] | 5452 | No  | NA   | 2 | 0 | Low-quality    | Genome-fragment | NA | 5.67  | 0     |
| S4-final-viral-combined_k141_40606   | [full] | 3443 | No  | NA   | 0 | 3 | Not-determined | Genome-fragment | NA | 0     | 0     |
| S4-final-viral-combined_k141_103244  | [full] | 3480 | No  | NA   | 0 | 1 | Not-determined | Genome-fragment | NA | 0     | 0     |
| S4-final-viral-combined_k141_5797    | [full] | 2823 | No  | NA   | 0 | 2 | Not-determined | Genome-fragment | NA | 0     | 0     |
| S4-final-viral-combined_k141_159484  | [full] | 1731 | No  | NA   | 0 | 1 | Not-determined | Genome-fragment | NA | 0     | 0     |
| S4-final-viral-combined_k141_138114  | [full] | 2351 | No  | NA   | 0 | 1 | Not-determined | Genome-fragment | NA | 0     | 0     |
| S7-final-viral-combined_k141_214389  | [full] | 5453 | No  | NA   | 4 | 0 | Low-quality    | Genome-fragment | NA | 8.7   | 0     |
| S4-final-viral-combined_k141_19262   | [full] | 1166 | No  | NA   | 0 | 0 | Not-determined | Genome-fragment | NA | 0     | 0     |
| S8-final-viral-combined_k141_243807  | [full] | 5454 | No  | NA   | 0 | 2 | Low-quality    | Genome-fragment | NA | 1.33  | 0     |
| S4-final-viral-combined_k141_159494  | [full] | 1682 | No  | NA   | 0 | 2 | Not-determined | Genome-fragment | NA | 0     | 0     |
| S4-final-viral-combined_k141_165838  | [full] | 1113 | No  | NA   | 0 | 1 | Not-determined | Genome-fragment | NA | 0     | 0     |
| S17-final-viral-combined_k141_211122 | [full] | 5455 | No  | NA   | 0 | 1 | Low-quality    | Genome-fragment | NA | 3.06  | 0     |
| S4-final-viral-combined_k141_33079   | [full] | 4173 | No  | NA   | 0 | 3 | Not-determined | Genome-fragment | NA | 0     | 0     |
| S4-final-viral-combined_k141_138146  | [full] | 2355 | No  | NA   | 0 | 1 | Not-determined | Genome-fragment | NA | 0     | 0     |
| S4-final-viral-combined_k141_138151  | [full] | 1824 | No  | NA   | 0 | 1 | Not-determined | Genome-fragment | NA | 0     | 0     |
| S4-final-viral-combined_k141_40668   | [full] | 4328 | No  | NA   | 0 | 1 | Not-determined | Genome-fragment | NA | 0     | 0     |
| S4-final-viral-combined_k141_19287   | [full] | 1974 | No  | NA   | 0 | 2 | Not-determined | Genome-fragment | NA | 0     | 0     |
| S4-final-viral-combined_k141_96656   | [full] | 1512 | No  | NA   | 0 | 1 | Not-determined | Genome-fragment | NA | 0     | 0     |
| S7-final-viral-combined_k141_117531  | [full] | 5456 | Yes | 2901 | 1 | 1 | Low-quality    | Genome-fragment | NA | 4.39  | 46.83 |
| S4-final-viral-combined_k141_103308  | [full] | 2814 | No  | NA   | 0 | 1 | Not-determined | Genome-fragment | NA | 0     | 0     |
| S8-final-viral-combined_k141_188476  | [full] | 5456 | No  | NA   | 0 | 5 | Low-quality    | Genome-fragment | NA | 7.41  | 0     |
| S4-final-viral-combined_k141_117298  | [full] | 1520 | No  | NA   | 0 | 0 | Not-determined | Genome-fragment | NA | 0     | 0     |
| S7_k141_199272                       | [full] | 5458 | No  | NA   | 0 | 5 | Low-quality    | Genome-fragment | NA | 2.39  | 0     |
| S4-final-viral-combined_k141_117294  | [full] | 2314 | No  | NA   | 0 | 2 | Not-determined | Genome-fragment | NA | 0     | 0     |
| S4-final-viral-combined_k141_5893    | [full] | 1793 | No  | NA   | 0 | 1 | Not-determined | Genome-fragment | NA | 0     | 0     |
| S2_k141_119951                       | [full] | 5458 | No  | NA   | 3 | 0 | Low-quality    | Genome-fragment | NA | 13.3  | 0     |
| S1-final-viral-combined_k141_73310   | [full] | 5459 | No  | NA   | 0 | 4 | Low-quality    | Genome-fragment | NA | 1.49  | 0     |
| S4-final-viral-combined_k141_83146   | [full] | 1940 | No  | NA   | 0 | 0 | Not-determined | Genome-fragment | NA | 0     | 0     |
| S6-final-viral-combined_k141_69074   | [full] | 5466 | Yes | 2374 | 1 | 2 | Low-quality    | Genome-fragment | NA | 1.31  | 56.57 |
| S4-final-viral-combined_k141_83180   | [full] | 1793 | No  | NA   | 0 | 2 | Not-determined | Genome-fragment | NA | 0     | 0     |
| S4-final-viral-combined_k141_99376   | [full] | 5466 | No  | NA   | 1 | 0 | Low-quality    | Genome-fragment | NA | 8.46  | 0     |
| S4-final-viral-combined_k141_61427   | [full] | 2607 | No  | NA   | 0 | 1 | Not-determined | Genome-fragment | NA | 0     | 0     |
| S4-final-viral-combined_k141_117331  | [full] | 1325 | No  | NA   | 0 | 1 | Not-determined | Genome-fragment | NA | 0     | 0     |
| S4-final-viral-combined_k141_75963   | [full] | 4173 | No  | NA   | 0 | 2 | Not-determined | Genome-fragment | NA | 0     | 0     |
| S4-final-viral-combined_k141_89583   | [full] | 1617 | No  | NA   | 0 | 1 | Not-determined | Genome-fragment | NA | 0     | 0     |
| S4-final-viral-combined_k141_152218  | [full] | 8058 | No  | NA   | 0 | 2 | Not-determined | Genome-fragment | NA | 0     | 0     |
| S4-final-viral-combined_k141_145834  | [full] | 2078 | No  | NA   | 0 | 2 | Not-determined | Genome-fragment | NA | 0     | 0     |
| S4-final-viral-combined_k141_614535  | [full] | 2760 | No  | NA   | 0 | 1 | Not-determined | Genome-fragment | NA | 0     | 0     |
| S4-final-viral-combined_k141_105974  | [full] | 1334 | No  | NA   | 0 | 0 | Not-determined | Genome-fragment | NA | 0     | 0     |
| S4-final-viral-combined_k141_40824   | [full] | 2674 | No  | NA   | 0 | 1 | Not-determined | Genome-fragment | NA | 0     | 0     |
| S11_k141_117286                      | [full] | 5467 | No  | NA   | 3 | 0 | Low-quality    | Genome-fragment | NA | 16.96 | 0     |
| S4-final-viral-combined_k141_61466   | [full] | 6362 | No  | NA   | 0 | 7 | Not-determined | Genome-fragment | NA | 0     | 0     |
| S4-final-viral-combined_k141_5977    | [full] | 4316 | No  | NA   | 0 | 1 | Not-determined | Genome-fragment | NA | 0     | 0     |
| S4-final-viral-combined_k141_61472   | [full] | 1537 | No  | NA   | 0 | 0 | Not-determined | Genome-fragment | NA | 0     | 0     |
| S4-final-viral-combined_k141_14202   | [full] | 1093 | No  | NA   | 0 | 2 | Not-determined | Genome-fragment | NA | 0     | 0     |
| S4-final-viral-combined_k141_40865   | [full] | 1968 | No  | NA   | 0 | 0 | Not-determined | Genome-fragment | NA | 0     | 0     |
| S17-k141_257683                      | [full] | 5467 | No  | NA   | 0 | 1 | Low-quality    | Genome-fragment | NA | 2.96  | 0     |
| S4-final-viral-combined_k141_99626   | [full] | 1140 | No  | NA   | 0 | 1 | Not-determined | Genome-fragment | NA | 0     | 0     |
| S4-final-viral-combined_k141_61506   | [full] | 1159 | No  | NA   | 0 | 0 | Not-determined | Genome-fragment | NA | 0     | 0     |
| S4-final-viral-combined_k141_76034   | [full] | 2712 | No  | NA   | 0 | 0 | Not-determined | Genome-fragment | NA | 0     | 0     |
| S4-final-viral-combined_k141_117407  | [full] | 1514 | No  | NA   | 0 | 2 | Not-determined | Genome-fragment | NA | 0     | 0     |
| S12-final-viral-combined_k141_11779  | [full] | 5468 | No  | NA   | 0 | 0 | Low-quality    | Genome-fragment | NA | 10.24 | 0     |
| S12-final-viral-combined_k141_167298 | [full] | 5470 | No  | NA   | 2 | 0 | Low-quality    | Genome-fragment | NA | 16.27 | 0     |
| S2_k141_343034                       | [full] | 5471 | No  | NA   | 0 | 0 | Low-quality    | Genome-fragment | NA | 11.29 | 0     |
| S4-final-viral-combined_k141_40903   | [full] | 1958 | No  | NA   | 0 | 0 | Not-determined | Genome-fragment | NA | 0     | 0     |
| S5-final-viral-combined_k141_103958  | [full] | 5471 | Yes | 2900 | 1 | 3 | Low-quality    | Genome-fragment | NA | 6.54  | 46.99 |
| S6-final-viral-combined_k141_66514   | [full] | 5471 | No  | NA   | 0 | 2 | Low-quality    | Genome-fragment | NA | 4.28  | 0     |
| S4-final-viral-combined_k141_13177   | [full] | 2571 | No  | NA   | 0 | 1 | Not-determined | Genome-fragment | NA | 0     | 0     |
| S8-final-viral-combined_k141_69538   | [full] | 5471 | No  | NA   | 1 | 0 | Low-quality    | Genome-fragment | NA | 14.05 | 0     |
| S9_k141_48325                        | [full] | 5472 | No  | NA   | 0 | 0 | Low-quality    | Genome-fragment | NA | 4.62  | 0     |
| S12-final-viral-combined_k141_201677 | [full] | 5472 | No  | NA   | 2 | 0 | Low-quality    | Genome-fragment | NA | 13.76 | 0     |
| S4-final-viral-combined_k141_76065   | [full] | 2028 | No  | NA   | 0 | 1 | Not-determined | Genome-fragment | NA | 0     | 0     |
| S7-final-viral-combined_k141_124833  | [full] | 5474 | No  | NA   | 1 | 2 | Low-quality    | Genome-fragment | NA | 7.43  | 0     |
| S4-final-viral-combined_k141_145859  | [full] | 1486 | No  | NA   | 0 | 0 | Not-determined | Genome-fragment | NA | 0     | 0     |
| S4-final-viral-combined_k141_103151  | [full] | 4811 | No  | NA   | 0 | 1 | Not-determined | Genome-fragment | NA | 0     | 0     |
| S4-final-viral-combined_k141_111180  | [full] | 3522 | No  | NA   | 0 | 3 | Not-determined | Genome-fragment | NA | 0     | 0     |
| S4-final-viral-combined_k141_48146   | [full] | 2045 | No  | NA   | 0 | 1 | Not-determined | Genome-fragment | NA | 0     | 0     |
| S4-final-viral-combined_k141_123862  | [full] | 3112 | No  | NA   | 0 | 0 | Not-determined | Genome-fragment | NA | 0     | 0     |
| S5-final-viral-combined_k141_27431   | [full] | 5476 | No  | NA   | 4 | 0 | Low-quality    | Genome-fragment | NA | 14.81 | 0     |
| S4-final-viral-combined_k141_26901   | [full] | 1707 | No  | NA   | 0 | 1 | Not-determined | Genome-fragment | NA | 0     | 0     |
| S4-final-viral-combined_k141_34188   | [full] | 1213 | No  | NA   | 0 | 1 | Not-determined | Genome-fragment | NA | 0     | 0     |
| S4-final-viral-combined_k141_96815   | [full] | 2648 | No  | NA   | 0 | 0 | Not-determined | Genome-fragment | NA | 0     | 0     |
| S4-final-viral-combined_k141_103413  | [full] | 1408 | No  | NA   | 0 | 2 | Not-determined | Genome-fragment | NA | 0     | 0     |
| S4-final-viral-combined_k141_54309   | [full] | 1884 | No  | NA   | 0 | 1 | Not-determined | Genome-fragment | NA | 0     | 0     |
| S4-final-viral-combined_k141_124071  | [full] | 1523 | No  | NA   | 0 | 0 | Not-determined | Genome-fragment | NA | 0     | 0     |
| S4-final-viral-combined_k141_112204  | [full] | 2866 | No  | NA   | 0 | 0 | Not-determined | Genome-fragment | NA | 0     | 0     |
| S4-final-viral-combined_k141_69046   | [full] | 1804 | No  | NA   | 0 | 1 | Not-determined | Genome-fragment | NA | 0     | 0     |
| S4-final-viral-combined_k141_138407  | [full] | 9016 | No  | NA   | 0 | 2 | Not-determined | Genome-fragment | NA | 0     | 0     |
| S4-final-viral-combined_k141_19514   | [full] | 3566 | No  | NA   | 0 | 1 | Not-determined | Genome-fragment | NA | 0     | 0     |
| S6_k141_14827                        | [full] | 5476 | No  | NA   | 0 | 2 | Low-quality    | Genome-fragment | NA | 3.41  | 0     |
| S4-final-viral-combined_k141_48186   | [full] | 1171 | No  | NA   | 0 | 1 | Not-determined | Genome-fragment | NA | 0     | 0     |
| S1-final-viral-combined_k141_45195   | [full] | 5477 | No  | NA   | 1 | 0 | Low-quality    | Genome-fragment | NA | 4.08  | 0     |
| S4-final-viral-combined_k141_19533   | [full] | 4155 | No  | NA   | 0 | 3 | Not-determined | Genome-fragment | NA | 0     | 0     |
| S7_k141_11505                        | [full] | 5477 | No  | NA   | 1 | 0 | Low-quality    | Genome-fragment | NA | 2.2   | 0     |
| S4-final-viral-combined_k141_103471  | [full] | 1773 | No  | NA   | 0 | 1 | Not-determined | Genome-fragment | NA | 0     | 0     |
| S4-final-viral-combined_k141_89765   | [full] | 1102 | No  | NA   | 0 | 1 | Not-determined | Genome-fragment | NA | 0     | 0     |
| S2-final-viral-combined_k141_166272  | [full] | 5477 | No  | NA   | 1 | 0 | Low-quality    |                 |    |       |       |



|                                      |       |     |       |     |    |                |                 |       |       |
|--------------------------------------|-------|-----|-------|-----|----|----------------|-----------------|-------|-------|
| S2_k141_7221                         | 5506  | No  | NA    | 0   | 6  | Low-quality    | Genome-fragment | 2.31  | 0     |
| S4-final-viral-combined_k141_152452  | 1275  | No  | NA    | 0   | 0  | Not-determined | Genome-fragment | NA    | 0     |
| S5-final-viral-combined_k141_190577  | 5509  | No  | NA    | 5   | 0  | Low-quality    | Genome-fragment | 9.09  | 0     |
| S7-final-viral-combined_k141_30140   | 5509  | No  | NA    | 1   | 2  | Low-quality    | Genome-fragment | 8.34  | 0     |
| S12_k141_266372                      | 5510  | No  | NA    | 0   | 2  | Low-quality    | Genome-fragment | 2.97  | 0     |
| S7-final-viral-combined_k141_98073   | 5511  | Yes | 2636  | 1   | 1  | Low-quality    | Genome-fragment | 1.22  | 52.17 |
| S9-final-viral-combined_k141_26972   | 5512  | No  | NA    | 0   | 2  | Low-quality    | Genome-fragment | 6.97  | 0     |
| S1_k141_391726                       | 5512  | No  | NA    | 0   | 1  | Low-quality    | Genome-fragment | 6.23  | 0     |
| S4-final-viral-combined_k141_89950   | 3762  | No  | NA    | 0   | 0  | Not-determined | Genome-fragment | NA    | 0     |
| S4-final-viral-combined_k141_13535   | 1129  | No  | NA    | 0   | 1  | Not-determined | Genome-fragment | NA    | 0     |
| S4-final-viral-combined_k141_412141  | 2901  | No  | NA    | 0   | 1  | Not-determined | Genome-fragment | NA    | 0     |
| S4-final-viral-combined_k141_152480  | 1840  | No  | NA    | 0   | 0  | Not-determined | Genome-fragment | NA    | 0     |
| S2-final-viral-combined_k141_18006   | 5512  | No  | NA    | 0   | 4  | Low-quality    | Genome-fragment | 9.39  | 0     |
| S17-final-viral-combined_k141_240045 | 5513  | No  | NA    | 3   | 0  | Low-quality    | Genome-fragment | 7.46  | 0     |
| S4-final-viral-combined_k141_111418  | 2567  | No  | NA    | 0   | 0  | Not-determined | Genome-fragment | NA    | 0     |
| S4-final-viral-combined_k141_160034  | 5369  | No  | NA    | 0   | 0  | Not-determined | Genome-fragment | NA    | 0     |
| S4-final-viral-combined_k141_146228  | 1087  | No  | NA    | 0   | 0  | Not-determined | Genome-fragment | NA    | 0     |
| S4-final-viral-combined_k141_131533  | 15519 | No  | NA    | 0   | 1  | Not-determined | Genome-fragment | NA    | 0     |
| S1_k141_214115                       | 5517  | Yes | 1707  | 1   | 2  | Low-quality    | Genome-fragment | 2.58  | 69.06 |
| S4-final-viral-combined_k141_160043  | 1124  | No  | NA    | 0   | 1  | Not-determined | Genome-fragment | NA    | 0     |
| S11-final-viral-combined_k141_213591 | 5518  | No  | NA    | 4   | 0  | Low-quality    | Genome-fragment | 11.83 | 0     |
| S1-final-viral-combined_k141_109305  | 5521  | No  | NA    | 0   | 0  | Low-quality    | Genome-fragment | 9.4   | 0     |
| S1_k141_330138                       | 5522  | No  | NA    | 0   | 2  | Low-quality    | Genome-fragment | 0.95  | 0     |
| S4-final-viral-combined_k141_138751  | 2209  | No  | NA    | 0   | 2  | Not-determined | Genome-fragment | NA    | 0     |
| S4-final-viral-combined_k141_124781  | 1202  | No  | NA    | 0   | 2  | Not-determined | Genome-fragment | NA    | 0     |
| S4-final-viral-combined_k141_172241  | 8646  | No  | NA    | 0   | 4  | Not-determined | Genome-fragment | NA    | 0     |
| S12-final-viral-combined_k141_199062 | 5523  | No  | NA    | 2   | 0  | Low-quality    | Genome-fragment | 13.31 | 0     |
| S4-final-viral-combined_k141_6460    | 1831  | No  | NA    | 0   | 1  | Not-determined | Genome-fragment | NA    | 0     |
| S4-final-viral-combined_k141_97111   | 4718  | No  | NA    | 0   | 2  | Not-determined | Genome-fragment | NA    | 0     |
| S4-final-viral-combined_k141_160086  | 1066  | No  | NA    | 0   | 0  | Not-determined | Genome-fragment | NA    | 0     |
| S4-final-viral-combined_k141_166447  | 3300  | No  | NA    | 0   | 1  | Not-determined | Genome-fragment | NA    | 0     |
| S4-final-viral-combined_k141_69435   | 3101  | No  | NA    | 0   | 4  | Not-determined | Genome-fragment | NA    | 0     |
| S11-final-viral-combined_k141_157151 | 5524  | No  | NA    | 0   | 2  | Low-quality    | Genome-fragment | 7.2   | 0     |
| S12-final-viral-combined_k141_140499 | 5525  | Yes | 3465  | 2   | 1  | Low-quality    | Genome-fragment | 5.22  | 37.29 |
| S4-final-viral-combined_k141_97177   | 1082  | No  | NA    | 0   | 1  | Not-determined | Genome-fragment | NA    | 0     |
| S4-final-viral-combined_k141_104500  | 5825  | No  | NA    | 0   | 2  | Not-determined | Genome-fragment | NA    | 0     |
| S4-final-viral-combined_k141_900361  | 2058  | No  | NA    | 0   | 2  | Not-determined | Genome-fragment | NA    | 0     |
| S4-final-viral-combined_k141_97171   | 2734  | No  | NA    | 0   | 2  | Not-determined | Genome-fragment | NA    | 0     |
| S4-final-viral-combined_k141_54808   | 1444  | No  | NA    | 0   | 2  | Not-determined | Genome-fragment | NA    | 0     |
| S4-final-viral-combined_k141_62071   | 2231  | No  | NA    | 0   | 3  | Not-determined | Genome-fragment | NA    | 0     |
| S4-final-viral-combined_k141_166488  | 4039  | No  | NA    | 0   | 3  | Not-determined | Genome-fragment | NA    | 0     |
| S4-final-viral-combined_k141_97198   | 1614  | No  | NA    | 1   | 1  | Not-determined | Genome-fragment | NA    | 0     |
| S6-final-viral-combined_k141_92028   | 5525  | No  | NA    | 4   | 0  | Low-quality    | Genome-fragment | 10.3  | 0     |
| S4-final-viral-combined_k141_199201  | 3246  | No  | NA    | 0   | 4  | Not-determined | Genome-fragment | NA    | 0     |
| S4-final-viral-combined_k141_117869  | 2304  | No  | NA    | 0   | 1  | Not-determined | Genome-fragment | NA    | 0     |
| S4-final-viral-combined_k141_4306    | 5526  | No  | NA    | 0   | 0  | Low-quality    | Genome-fragment | 16.17 | 0     |
| S3_k141_20915                        | 5529  | No  | NA    | 5   | 0  | Low-quality    | Genome-fragment | 10.27 | 0     |
| S4-final-viral-combined_k141_166539  | 2054  | No  | NA    | 0   | 1  | Not-determined | Genome-fragment | NA    | 0     |
| S4-final-viral-combined_k141_148953  | 3112  | No  | NA    | 0   | 0  | Not-determined | Genome-fragment | NA    | 0     |
| S4-final-viral-combined_k141_138929  | 4490  | No  | NA    | 0   | 1  | Not-determined | Genome-fragment | NA    | 0     |
| S1-final-viral-combined_k141_16595   | 5532  | No  | NA    | 0   | 0  | Low-quality    | Genome-fragment | 7.86  | 0     |
| S12-final-viral-combined_k141_54018  | 5532  | No  | NA    | 0   | 2  | Low-quality    | Genome-fragment | 1.53  | 0     |
| S9_k141_66042                        | 5533  | No  | NA    | 0   | 1  | Low-quality    | Genome-fragment | 0.48  | 0     |
| S4-final-viral-combined_k141_6627    | 1202  | No  | NA    | 0   | 2  | Not-determined | Genome-fragment | NA    | 0     |
| S1_k141_172548                       | 5534  | No  | NA    | 1   | 0  | Low-quality    | Genome-fragment | 43.55 | 0     |
| S4-final-viral-combined_k141_34481   | 1589  | No  | NA    | 0   | 1  | Not-determined | Genome-fragment | NA    | 0     |
| S4-final-viral-combined_k141_19955   | 3336  | No  | NA    | 0   | 3  | Not-determined | Genome-fragment | NA    | 0     |
| S4-final-viral-combined_k141_62182   | 1345  | No  | NA    | 0   | 3  | Not-determined | Genome-fragment | NA    | 0     |
| S4-final-viral-combined_k141_69575   | 4817  | No  | NA    | 0   | 4  | Not-determined | Genome-fragment | NA    | 0     |
| S8-final-viral-combined_k141_161057  | 5534  | No  | NA    | 0   | 0  | Low-quality    | Genome-fragment | 14.34 | 0     |
| S17-final-viral-combined_k141_35944  | 5535  | No  | NA    | 2   | 0  | Low-quality    | Genome-fragment | 9.09  | 0     |
| S11-final-viral-combined_k141_254271 | 5536  | No  | NA    | 0   | 2  | Low-quality    | Genome-fragment | 3.2   | 0     |
| S4-final-viral-combined_k141_48625   | 1537  | No  | NA    | 0   | 0  | Not-determined | Genome-fragment | NA    | 0     |
| S7-final-viral-combined_k141_110472  | 5536  | No  | NA    | 0   | 5  | Low-quality    | Genome-fragment | 4.83  | 0     |
| S4-final-viral-combined_k141_13723   | 3061  | No  | NA    | 0   | 0  | Not-determined | Genome-fragment | NA    | 0     |
| S12_k141_71977                       | 5536  | No  | NA    | 0   | 0  | Low-quality    | Genome-fragment | 8.86  | 0     |
| S9_k141_97274                        | 5537  | No  | NA    | 0   | 2  | Low-quality    | Genome-fragment | 2.17  | 0     |
| S4-final-viral-combined_k141_90218   | 2861  | No  | NA    | 0   | 2  | Not-determined | Genome-fragment | NA    | 0     |
| S4-final-viral-combined_k141_486541  | 2183  | No  | NA    | 0   | 0  | Not-determined | Genome-fragment | NA    | 0     |
| S4-final-viral-combined_k141_166660  | 2042  | No  | NA    | 0   | 1  | Not-determined | Genome-fragment | NA    | 0     |
| S4-final-viral-combined_k141_14582   | 2124  | No  | NA    | 0   | 1  | Not-determined | Genome-fragment | NA    | 0     |
| S4-final-viral-combined_k141_139068  | 1363  | No  | NA    | 0   | 2  | Not-determined | Genome-fragment | NA    | 0     |
| S1_k141_27081                        | 5539  | No  | NA    | 1   | 0  | Low-quality    | Genome-fragment | 5.95  | 0     |
| S5_k141_76337                        | 5540  | No  | NA    | 2   | 0  | Low-quality    | Genome-fragment | 16.75 | 0     |
| S4-final-viral-combined_k141_13770   | 3398  | No  | NA    | 0   | 0  | Not-determined | Genome-fragment | NA    | 0     |
| S4-final-viral-combined_k141_180000  | 1115  | No  | NA    | 0   | 1  | Not-determined | Genome-fragment | NA    | 0     |
| S4-final-viral-combined_k141_41468   | 2738  | No  | NA    | 0   | 1  | Not-determined | Genome-fragment | NA    | 0     |
| S2-final-viral-combined_k141_52712   | 5542  | Yes | 2007  | 1   | 1  | Low-quality    | Genome-fragment | 1.54  | 63.79 |
| S12-final-viral-combined_k141_16078  | 5543  | No  | NA    | 0   | 0  | Low-quality    | Genome-fragment | 12.91 | 0     |
| S5-final-viral-combined_k141_84219   | 5544  | No  | NA    | 0   | 0  | Low-quality    | Genome-fragment | 3.26  | 0     |
| S4-final-viral-combined_k141_139092  | 1141  | No  | NA    | 0   | 0  | Not-determined | Genome-fragment | NA    | 0     |
| S4-final-viral-combined_k141_103842  | 1135  | No  | NA    | 0   | 0  | Not-determined | Genome-fragment | NA    | 0     |
| S4-final-viral-combined_k141_62283   | 7929  | No  | NA    | 0   | 1  | Not-determined | Genome-fragment | NA    | 0     |
| S4-final-viral-combined_k141_118013  | 2266  | No  | NA    | 0   | 0  | Not-determined | Genome-fragment | NA    | 0     |
| S4-final-viral-combined_k141_160701  | 5669  | No  | NA    | 0   | 4  | Not-determined | Genome-fragment | NA    | 0     |
| S4-final-viral-combined_k141_90316   | 3351  | No  | NA    | 0   | 2  | Not-determined | Genome-fragment | NA    | 0     |
| S4-final-viral-combined_k141_48718   | 1055  | No  | NA    | 0   | 0  | Not-determined | Genome-fragment | NA    | 0     |
| S4_k141_55504                        | 5544  | No  | NA    | 0   | 1  | Low-quality    | Genome-fragment | 12.71 | 0     |
| S2-final-viral-combined_k141_114669  | 5546  | No  | NA    | 0   | 1  | Low-quality    | Genome-fragment | 12.39 | 0     |
| S4-final-viral-combined_k141_103881  | 1627  | No  | NA    | 0   | 0  | Not-determined | Genome-fragment | NA    | 0     |
| S4-final-viral-combined_k141_145005  | 5546  | No  | NA    | 2   | 0  | Low-quality    | Genome-fragment | 3.93  | 0     |
| S17-final-viral-combined_k141_102560 | 5549  | No  | NA    | 0   | 1  | Low-quality    | Genome-fragment | 4.31  | 0     |
| S17_k141_115367                      | 5549  | No  | NA    | 1   | 2  | Low-quality    | Genome-fragment | 9.64  | 0     |
| S4-final-viral-combined_k141_55020   | 2395  | No  | NA    | 0   | 8  | Not-determined | Genome-fragment | NA    | 0     |
| S4-final-viral-combined_k141_131844  | 1843  | No  | NA    | 0   | 0  | Not-determined | Genome-fragment | NA    | 0     |
| S1-final-viral-combined_k141_134515  | 5550  | No  | NA    | 0   | 2  | Low-quality    | Genome-fragment | 6.19  | 0     |
| S4-final-viral-combined_k141_6764    | 3778  | No  | NA    | 0   | 2  | Not-determined | Genome-fragment | NA    | 0     |
| S4-final-viral-combined_k141_147515  | 2122  | No  | NA    | 0   | 0  | Not-determined | Genome-fragment | NA    | 0     |
| S4-final-viral-combined_k141_139191  | 1286  | No  | NA    | 0   | 1  | Not-determined | Genome-fragment | NA    | 0     |
| S4-final-viral-combined_k141_13842   | 12975 | No  | NA    | 0   | 5  | Not-determined | Genome-fragment | NA    | 0     |
| S4-final-viral-combined_k141_41490   | 87229 | Yes | 34472 | 16  | 33 | Medium-quality | Genome-fragment | 55.23 | 61.63 |
| S4-final-viral-combined_k141_623718  | 2805  | No  | NA    | 0   | 1  | Not-determined | Genome-fragment | NA    | 0     |
| S4-final-viral-combined_k141_14740   | 2602  | No  | NA    | 0   | 2  | Not-determined | Genome-fragment | NA    | 0     |
| S4-final-viral-combined_k141_6803    | 1289  | No  | NA    | 0   | 0  | Not-determined | Genome-fragment | NA    | 0     |
| S12-final-viral-combined_k141_344481 | 5550  | No  | NA    | 0   | 0  | Low-quality    | Genome-fragment | 12.66 | 0     |
| S4-final-viral-combined_k141_118144  | 2022  | No  | NA    | 0   | 2  | Not-determined | Genome-fragment | NA    | 0     |
| S4-final-viral-combined_k141_34787   | 2552  | No  | NA    | 0   | 1  | Not-determined | Genome-fragment | NA    | 0     |
| S4-final-viral-combined_k141_41561   | 3268  | No  | NA    | 0   | 2  | Not-determined | Genome-fragment | NA    | 0     |
| S17-final-viral-combined_k141_68151  | 5551  | No  | NA    | 0   | 0  | Low-quality    | Genome-fragment | 2.57  | 0     |
| S12-final-viral-combined_k141_64961  | 5551  | No  | NA    | 0   | 1  | Low-quality    | Genome-fragment | 11.43 | 0     |
| S4-final-viral-combined_k141_6854    | 12538 | No  | NA    | 0   | 9  | Not-determined | Genome-fragment | NA    | 0     |
| S4-final-viral-combined_k141_37453   | 3570  | No  | NA    | 0   | 0  | Not-determined | Genome-fragment | NA    | 0     |
| S6_k141_7195                         | 5551  | No  | NA    | 2   | 0  | Low-quality    | Genome-fragment | 5.55  | 0     |
| S4-final-viral-combined_k141_20220   | 5541  | No  | NA    | 0   | 1  | Not-determined | Genome-fragment | NA    | 0     |
| S4-final-viral-combined_k141_153011  | 2041  | No  | NA    | 0   | 2  | Not-determined | Genome-fragment | NA    | 0     |
| S8-final-viral-combined_k141_130915  | 5555  | No  | NA    | 4   | 0  | Low-quality    | Genome-fragment | 12.55 | 0     |
| S4-final-viral-combined_k141_6870    | 1827  | No  | NA    | 0   | 1  | Not-determined | Genome-fragment | NA    | 0     |
| S4-final-viral-combined_k141_16684   | 2413  | No  | NA    | 0   | 0  | Not-determined | Genome-fragment | NA    | 0     |
| S4-final-viral-combined_k141_5509    | 2060  | No  | NA    | 0   | 1  | Not-determined | Genome-fragment | NA    | 0     |
| S5-final-viral-combined_k141_59281   | 5558  | No  | NA    | 0   | 2  | Low-quality    | Genome-fragment | 4.64  | 0     |
| S12-final-viral-combined_k141_143097 | 5560  | No  | NA    | 3   | 0  | Low-quality    | Genome-fragment | 11.97 | 0     |
| S4-final-viral-combined_k141_6506    | 1386  | No  | NA    | 0   | 0  | Not-determined | Genome-fragment | NA    | 0     |
| S4-final-viral-combined_k141_41632   | 1100  | No  | NA    | 0   | 0  | Not-determined | Genome-fragment | NA    | 0     |
| S4-final-viral-combined_k141_124939  | 1968  | No  | NA    | 0   | 1  | Not-determined | Genome-fragment | NA    | 0     |
| S12_k141_204975                      | 5562  | No  | NA    | 0   | 0  | Low-quality    | Genome-fragment | 9.22  | 0     |
| S11-final-viral-combined_k141_198918 | 5564  | No  | NA    | 0   | 3  | Low-quality    | Genome-fragment | 4.02  | 0     |
| S17-final-viral-combined_k141_139995 | 5569  | No  | NA    | 0   | 4  | Low-quality    | Genome-fragment | 18.4  | 0     |
| S12-final-viral-combined_k141_36262  | 5569  | No  | NA    | 0   | 1  | Low-quality    | Genome-fragment | 5.21  | 0     |
| S4-final-viral-combined_k141_153077  | 5922  | No  | NA    | 0   | 0  | Not-determined | Genome-fragment | NA    | 0     |
| S12_k141_387996                      | 5569  | Yes | 3709  | 1   | 2  | Low-quality    | Genome-fragment | 3.13  | 33.4  |
| S2-final-viral-combined_k141_170300  | 5569  | Yes | 4340  | 1   | 1  | Low-quality    | Genome-fragment | 5.17  | 22.07 |
| S5_k141_3450                         | 5571  | No  | NA    | 1   | 1  | Low-quality    | Genome-fragment | 24.73 | 0     |
| S4-final-viral-combined_k141_88138   | 5571  | Yes | 3611  | 1   | 1  | Low-quality    | Genome-fragment | 2.6   | 35.18 |
| S4-final-viral-combined_k141_132169  | 2033  | No  | NA    | 0   | 0  | Not-determined | Genome-fragment | NA    | 0     |
| S8_k141_81723                        | 5574  | No  | NA    | 0   | 0  | Low-quality    | Genome-fragment | 5.72  | 0     |
| S5-final-viral-combined_k141_178798  | 5576  | No  | NA    | 6   | 0  | Low-quality    | Genome-fragment | 19.33 | 0     |
| S17_k141_59157                       | 5577  | No  | NA    | 2   | 0  | Low-quality    | Genome-fragment | 13.99 | 0     |
| S4-final-viral-combined_k141_132224  | 2334  | No  | NA    | 0   | 2  | Not-determined | Genome-fragment | NA    | 0     |
| S4-final-viral-combined_k141_132257  | 1737  | No  | NA    | 0</ |    |                |                 |       |       |



|                                        |          |       |     |    |      |    |                |                 |       |       |
|----------------------------------------|----------|-------|-----|----|------|----|----------------|-----------------|-------|-------|
| S8-final-viral-combined_k141_222526]]  | full     | 5593  | No  | NA | 0    | 0  | Low-quality    | Genome-fragment | 5.7   | 0     |
| S11_k141_215404                        |          | 5595  | No  | NA | 2    | 0  | Low-quality    | Genome-fragment | 12.26 | 0     |
| S17-final-viral-combined_k141_259128]] | full     | 5595  | No  | NA | 4    | 0  | Low-quality    | Genome-fragment | 10.53 | 0     |
| S12_k141_321452]]                      | full     | 5596  | No  | NA | 4    | 0  | Low-quality    | Genome-fragment | 8.17  | 0     |
| S12_k141_288324                        |          | 5596  | Yes |    | 1    | 2  | Low-quality    | Genome-fragment | 2.36  | 33.15 |
| S4-final-viral-combined_k141_31975]]   | full     | 5600  | Yes |    | 1    | 1  | Low-quality    | Genome-fragment | 6.42  | 13.34 |
| S11-final-viral-combined_k141_198731]] | full     | 5601  | No  | NA | 1    | 0  | Low-quality    | Genome-fragment | 13.62 | 0     |
| S4-final-viral-combined_k141_21350]]   | [[H2gene | 1914  | No  | NA | 0    | 2  | Not-determined | Genome-fragment | NA    | 10.72 |
| S1-final-viral-combined_k141_298853]]  | full     | 5602  | No  |    | 3    | 0  | Low-quality    | Genome-fragment | 5.57  | 0     |
| S12_k141_255003                        |          | 5602  | Yes |    | 1    | 3  | Low-quality    | Genome-fragment | 0.54  | 85.2  |
| S4-final-viral-combined_k141_126025]]  | [[H2gene | 1456  | No  | NA | 0    | 0  | Not-determined | Genome-fragment | NA    | 0     |
| S4-final-viral-combined_k141_144277]]  | full     | 1628  | No  | NA | 0    | 0  | Not-determined | Genome-fragment | NA    | 0     |
| S12_k141_206235                        |          | 5602  | No  | NA | 0    | 3  | Low-quality    | Genome-fragment | 5.49  | 0     |
| S4-final-viral-combined_k141_140584]]  | [[H2gene | 1272  | No  | NA | 0    | 1  | Not-determined | Genome-fragment | NA    | 0     |
| S5-final-viral-combined_k141_124277]]  | full     | 5604  | No  | NA | 1    | 0  | Low-quality    | Genome-fragment | 6.64  | 0     |
| S7-final-viral-combined_k141_63312]]   | full     | 5605  | Yes |    | 3945 | 0  | Low-quality    | Genome-fragment | 7.7   | 29.63 |
| S4-final-viral-combined_k141_49695]]   | [[H2gene | 1761  | No  | NA | 0    | 2  | Not-determined | Genome-fragment | NA    | 0     |
| S17-final-viral-combined_k141_195698]] | full     | 5607  | No  | NA | 7    | 0  | Low-quality    | Genome-fragment | 10.1  | 0     |
| S11-final-viral-combined_k141_137242]] | full     | 5608  | No  | NA | 6    | 0  | Low-quality    | Genome-fragment | 12.95 | 0     |
| S17-final-viral-combined_k141_224386]] | full     | 5609  | No  | NA | 1    | 0  | Low-quality    | Genome-fragment | 4.46  | 0     |
| S17-final-viral-combined_k141_124725]] | full     | 5610  | No  | NA | 0    | 3  | Low-quality    | Genome-fragment | 14.92 | 0     |
| S7-final-viral-combined_k141_168192]]  | full     | 5611  | No  | NA | 0    | 0  | Low-quality    | Genome-fragment | 6.82  | 0     |
| S4-final-viral-combined_k141_64387]]   | [[H2gene | 1356  | No  | NA | 0    | 0  | Not-determined | Genome-fragment | NA    | 0     |
| S4-final-viral-combined_k141_99242]]   | [[H2gene | 1197  | No  | NA | 0    | 0  | Not-determined | Genome-fragment | NA    | 0     |
| S1-final-viral-combined_k141_314370]]  | full     | 5612  | No  | NA | 1    | 0  | Low-quality    | Genome-fragment | 3.58  | 0     |
| S6-final-viral-combined_k141_78112]]   | full     | 5612  | No  | NA | 1    | 4  | Low-quality    | Genome-fragment | 3.85  | 0     |
| S12_k141_175144                        |          | 5615  | No  | NA | 6    | 0  | Low-quality    | Genome-fragment | 14.97 | 0     |
| S4-final-viral-combined_k141_106607]]  | [[H2gene | 1136  | No  | NA | 0    | 0  | Not-determined | Genome-fragment | NA    | 0     |
| S8_k141_271615                         |          | 5615  | No  | NA | 6    | 0  | Low-quality    | Genome-fragment | 7.6   | 0     |
| S11-final-viral-combined_k141_283716]] | full     | 5616  | No  | NA | 0    | 4  | Low-quality    | Genome-fragment | 8.69  | 0     |
| S11-final-viral-combined_k141_247113]] | full     | 5616  | No  | NA | 0    | 2  | Low-quality    | Genome-fragment | 6.4   | 0     |
| S4-final-viral-combined_k141_20161]]   | [[H2gene | 1764  | No  | NA | 1    | 0  | Not-determined | Genome-fragment | NA    | 0     |
| S4-final-viral-combined_k141_23093]]   | [[H2gene | 2671  | No  | NA | 0    | 0  | Not-determined | Genome-fragment | NA    | 0     |
| S17-final-viral-combined_k141_27200]]  | full     | 5616  | No  | NA | 0    | 1  | Low-quality    | Genome-fragment | 17.01 | 0     |
| S1_k141_148939                         |          | 5618  | No  | NA | 7    | 0  | Low-quality    | Genome-fragment | 13.22 | 0     |
| S5_k141_82708                          |          | 5618  | No  | NA | 0    | 0  | Low-quality    | Genome-fragment | 14.23 | 0     |
| S4-final-viral-combined_k141_93232]]   | [[H2gene | 2201  | No  | NA | 0    | 0  | Not-determined | Genome-fragment | NA    | 0     |
| S17_k141_89044                         |          | 5624  | No  | NA | 0    | 1  | Low-quality    | Genome-fragment | 36.18 | 0     |
| S9-final-viral-combined_k141_11903]]   | full     | 5626  | Yes |    | 4887 | 1  | Low-quality    | Genome-fragment | 3.29  | 11.14 |
| S4-final-viral-combined_k141_155855]]  | [[H2gene | 3238  | No  | NA | 1    | 0  | Not-determined | Genome-fragment | NA    | 0     |
| S4-final-viral-combined_k141_135126]]  | [[H2gene | 1048  | No  | NA | 0    | 1  | Not-determined | Genome-fragment | NA    | 0     |
| S11-final-viral-combined_k141_27810]]  | full     | 5627  | No  | NA | 0    | 0  | Low-quality    | Genome-fragment | 3.49  | 0     |
| S4-final-viral-combined_k141_16649]]   | [[H2gene | 1138  | No  | NA | 0    | 0  | Not-determined | Genome-fragment | NA    | 0     |
| S4-final-viral-combined_k141_93544]]   | [[H2gene | 1141  | No  | NA | 0    | 0  | Not-determined | Genome-fragment | NA    | 0     |
| S4-final-viral-combined_k141_156382]]  | [[H2gene | 1119  | No  | NA | 1    | 0  | Not-determined | Genome-fragment | NA    | 0     |
| S5-final-viral-combined_k141_194131]]  | full     | 5628  | No  | NA | 0    | 0  | Low-quality    | Genome-fragment | 16.1  | 0     |
| S4-final-viral-combined_k141_156441]]  | [[H2gene | 1841  | No  | NA | 0    | 0  | Not-determined | Genome-fragment | NA    | 0     |
| S4-final-viral-combined_k141_23973]]   | [[H2gene | 1054  | No  | NA | 0    | 1  | Not-determined | Genome-fragment | NA    | 0     |
| S12-final-viral-combined_k141_210979]] | full     | 5629  | No  | NA | 0    | 1  | Low-quality    | Genome-fragment | 9.38  | 0     |
| S17_k141_66932                         |          | 5630  | No  | NA | 0    | 2  | Low-quality    | Genome-fragment | 0.48  | 0     |
| S11-final-viral-combined_k141_249813]] | full     | 5631  | No  | NA | 1    | 0  | Low-quality    | Genome-fragment | 3.44  | 0     |
| S11-final-viral-combined_k141_247246]] | full     | 5631  | No  | NA | 1    | 0  | Low-quality    | Genome-fragment | 7.7   | 0     |
| S11-final-viral-combined_k141_327073]] | full     | 5632  | Yes |    | 2492 | 2  | Low-quality    | Genome-fragment | 1.25  | 55.75 |
| S1_k141_188200                         |          | 5633  | No  | NA | 0    | 0  | Low-quality    | Genome-fragment | 9.69  | 0     |
| S4-final-viral-combined_k141_128919]]  | [[H2gene | 1704  | No  | NA | 0    | 0  | Not-determined | Genome-fragment | NA    | 0     |
| S8-final-viral-combined_k141_116882]]  | full     | 5633  | No  | NA | 0    | 0  | Low-quality    | Genome-fragment | 1.65  | 0     |
| S4-final-viral-combined_k141_136097]]  | [[H2gene | 1507  | No  | NA | 0    | 0  | Not-determined | Genome-fragment | NA    | 0     |
| S3-final-viral-combined_k141_62189]]   | full     | 5634  | No  | NA | 0    | 3  | Low-quality    | Genome-fragment | 7.18  | 0     |
| S5-final-viral-combined_k141_47178]]   | full     | 5635  | No  | NA | 1    | 0  | Low-quality    | Genome-fragment | 14.54 | 0     |
| S2_k141_85129                          |          | 5638  | No  | NA | 2    | 0  | Low-quality    | Genome-fragment | 6.41  | 0     |
| S2-final-viral-combined_k141_34126]]   | full     | 5641  | No  | NA | 2    | 0  | Low-quality    | Genome-fragment | 4     | 0     |
| S8-final-viral-combined_k141_252633]]  | full     | 5641  | No  | NA | 0    | 5  | Low-quality    | Genome-fragment | 2.24  | 0     |
| S11-final-viral-combined_k141_319842]] | full     | 5642  | No  | NA | 0    | 0  | Low-quality    | Genome-fragment | 9.97  | 0     |
| S7_k141_6331                           |          | 5644  | No  | NA | 0    | 1  | Low-quality    | Genome-fragment | 9.08  | 0     |
| S4-final-viral-combined_k141_25157]]   | [[H2gene | 1750  | No  | NA | 0    | 0  | Not-determined | Genome-fragment | NA    | 0     |
| S5_k141_112513                         |          | 5646  | No  | NA | 0    | 2  | Low-quality    | Genome-fragment | 2.82  | 0     |
| S1-final-viral-combined_k141_16151]]   | full     | 5649  | No  | NA | 0    | 4  | Low-quality    | Genome-fragment | 7.11  | 0     |
| S7-final-viral-combined_k141_181098]]  | full     | 5650  | No  | NA | 0    | 3  | Low-quality    | Genome-fragment | 12.38 | 0     |
| S6-final-viral-combined_k141_113131]]  | full     | 5651  | Yes |    | 3926 | 0  | Low-quality    | Genome-fragment | 2.64  | 38.1  |
| S2-final-viral-combined_k141_237242]]  | full     | 5653  | No  | NA | 0    | 1  | Low-quality    | Genome-fragment | 9.08  | 0     |
| S1-final-viral-combined_k141_243424]]  | full     | 5655  | No  | NA | 1    | 1  | Low-quality    | Genome-fragment | 12.47 | 0     |
| S8_k141_107686                         |          | 5657  | No  | NA | 1    | 0  | Low-quality    | Genome-fragment | 4.52  | 0     |
| S17-final-viral-combined_k141_24262]]  | full     | 5658  | No  | NA | 3    | 0  | Low-quality    | Genome-fragment | 13.08 | 0     |
| S17-final-viral-combined_k141_186509]] | full     | 5659  | No  | NA | 0    | 4  | Low-quality    | Genome-fragment | 1.87  | 0     |
| S3_k141_8158                           |          | 5660  | No  | NA | 0    | 0  | Low-quality    | Genome-fragment | 7.17  | 0     |
| S7-final-viral-combined_k141_177043]]  | full     | 5660  | No  | NA | 1    | 0  | Low-quality    | Genome-fragment | 11.79 | 0     |
| S7_k141_33300                          |          | 5664  | No  | NA | 4    | 0  | Low-quality    | Genome-fragment | 13.56 | 0     |
| S12-final-viral-combined_k141_70991]]  | full     | 5664  | No  | NA | 2    | 0  | Low-quality    | Genome-fragment | 8.84  | 0     |
| S11-final-viral-combined_k141_177915]] | full     | 5666  | No  | NA | 0    | 0  | Low-quality    | Genome-fragment | 6.79  | 0     |
| S11_k141_227018                        |          | 5666  | No  | NA | 0    | 3  | Low-quality    | Genome-fragment | 14.22 | 0     |
| S4-final-viral-combined_k141_76116]]   | [[H2gene | 1016  | No  | NA | 0    | 0  | Not-determined | Genome-fragment | NA    | 0     |
| S17-final-viral-combined_k141_141538]] | full     | 5666  | No  | NA | 0    | 2  | Low-quality    | Genome-fragment | 4.08  | 0     |
| S4-final-viral-combined_k141_96994]]   | [[H2gene | 1478  | No  | NA | 0    | 0  | Not-determined | Genome-fragment | NA    | 0     |
| S4-final-viral-combined_k141_41211]]   | [[H2gene | 1152  | No  | NA | 0    | 0  | Not-determined | Genome-fragment | NA    | 0     |
| S4-final-viral-combined_k141_166406]]  | [[H2gene | 1521  | No  | NA | 0    | 1  | Not-determined | Genome-fragment | NA    | 0     |
| S1_k141_288324                         |          | 5667  | No  | NA | 3    | 1  | Low-quality    | Genome-fragment | 13.45 | 0     |
| S4-final-viral-combined_k141_200141]]  | [[H2gene | 3421  | No  | NA | 0    | 2  | Not-determined | Genome-fragment | NA    | 0     |
| S17-final-viral-combined_k141_170578]] | full     | 5668  | No  | NA | 1    | 0  | Low-quality    | Genome-fragment | 10.09 | 0     |
| S4-final-viral-combined_k141_160781]]  | [[H2gene | 1515  | No  | NA | 0    | 0  | Not-determined | Genome-fragment | NA    | 0     |
| S4-final-viral-combined_k141_153037]]  | [[H2gene | 1171  | No  | NA | 0    | 0  | Not-determined | Genome-fragment | NA    | 0     |
| S4-final-viral-combined_k141_90546]]   | [[H2gene | 1593  | No  | NA | 0    | 0  | Not-determined | Genome-fragment | NA    | 0     |
| S8-final-viral-combined_k141_47741]]   | full     | 5668  | No  | NA | 0    | 1  | Low-quality    | Genome-fragment | 3.37  | 0     |
| S7_k141_91869                          |          | 5669  | No  | NA | 0    | 0  | Low-quality    | Genome-fragment | 9.47  | 0     |
| S11-final-viral-combined_k141_45993]]  | full     | 5672  | No  | NA | 6    | 0  | Low-quality    | Genome-fragment | 42.67 | 0     |
| S4_k141_160220                         |          | 4202  | No  | NA | 0    | 0  | Not-determined | Genome-fragment | NA    | 0     |
| S4_k141_97540                          |          | 1141  | No  | NA | 0    | 0  | Not-determined | Genome-fragment | NA    | 0     |
| S4_k141_48797                          |          | 1168  | No  | NA | 0    | 1  | Not-determined | Genome-fragment | NA    | 0     |
| S4_k141_69708                          |          | 1131  | No  | NA | 0    | 0  | Not-determined | Genome-fragment | NA    | 0     |
| S2_k141_208183                         |          | 5672  | No  | NA | 0    | 0  | Low-quality    | Genome-fragment | 4.91  | 0     |
| S4_k141_118442                         |          | 1008  | No  | NA | 0    | 2  | Not-determined | Genome-fragment | NA    | 0     |
| S4_k141_153291                         |          | 1604  | No  | NA | 0    | 1  | Not-determined | Genome-fragment | NA    | 0     |
| S4_k141_11824                          |          | 3411  | No  | NA | 0    | 2  | Not-determined | Genome-fragment | NA    | 0     |
| S4_k141_48810                          |          | 1507  | No  | NA | 0    | 0  | Not-determined | Genome-fragment | NA    | 0     |
| S4_k141_41842                          |          | 1316  | No  | NA | 0    | 1  | Not-determined | Genome-fragment | NA    | 0     |
| S9_k141_30632                          |          | 5679  | No  | NA | 0    | 2  | Low-quality    | Genome-fragment | 1.5   | 0     |
| S4_k141_79                             |          | 1343  | No  | NA | 0    | 0  | Not-determined | Genome-fragment | NA    | 0     |
| S4_k141_20978                          |          | 1945  | No  | NA | 0    | 0  | Not-determined | Genome-fragment | NA    | 0     |
| S4_k141_30640                          |          | 1033  | No  | NA | 0    | 1  | Not-determined | Genome-fragment | NA    | 0     |
| S11-final-viral-combined_k141_134967]] | full     | 5679  | No  | NA | 5    | 0  | Low-quality    | Genome-fragment | 9.27  | 0     |
| S4_k141_118457                         |          | 1440  | No  | NA | 0    | 2  | Not-determined | Genome-fragment | NA    | 0     |
| S4_k141_69754                          |          | 1403  | No  | NA | 0    | 2  | Not-determined | Genome-fragment | NA    | 0     |
| S4_k141_131                            |          | 2343  | No  | NA | 0    | 0  | Not-determined | Genome-fragment | NA    | 0     |
| S4_k141_90682                          |          | 1155  | No  | NA | 0    | 0  | Not-determined | Genome-fragment | NA    | 0     |
| S4_k141_115547                         |          | 1225  | No  | NA | 0    | 1  | Not-determined | Genome-fragment | NA    | 0     |
| S4_k141_55776                          |          | 1023  | No  | NA | 0    | 1  | Not-determined | Genome-fragment | NA    | 0     |
| S4_k141_139433                         |          | 1757  | No  | NA | 0    | 1  | Not-determined | Genome-fragment | NA    | 0     |
| S4_k141_97599                          |          | 1026  | No  | NA | 0    | 0  | Not-determined | Genome-fragment | NA    | 0     |
| S4_k141_111555                         |          | 3611  | No  | NA | 0    | 0  | Not-determined | Genome-fragment | NA    | 0     |
| S4_k141_140134                         |          | 31168 | No  | NA | 0    | 12 | Not-determined | Genome-fragment | NA    | 0     |
| S4_k141_76766                          |          | 2025  | No  | NA | 0    | 2  | Not-determined | Genome-fragment | NA    | 0     |
| S2-final-viral-combined_k141_226129]]  | full     | 5681  | No  | NA | 0    | 3  | Low-quality    | Genome-fragment | 3.44  | 0     |
| S4_k141_83688                          |          | 4620  | No  | NA | 0    | 0  | Not-determined | Genome-fragment | NA    | 0     |
| S1_k141_32789                          |          | 5683  | No  | NA | 2    | 0  | Low-quality    | Genome-fragment | 13.85 | 0     |
| S6_k141_22627                          |          | 5684  | No  | NA | 0    | 0  | Low-quality    | Genome-fragment | 4.7   | 0     |
| S4_k141_62820                          |          | 2017  | No  | NA | 0    | 2  | Not-determined | Genome-fragment | NA    | 0     |
| S4_k141_118518                         |          | 1039  | No  | NA | 0    | 1  | Not-determined | Genome-fragment | NA    | 0     |
| S17-final-viral-combined_k141_73141]]  | full     | 5686  | No  | NA | 0    | 0  | Low-quality    | Genome-fragment | 13.7  | 0     |
| S4_k141_48848                          |          | 6919  | No  | NA | 0    | 4  | Not-determined | Genome-fragment | NA    | 0     |
| S12_k141_332013                        |          | 5687  | No  | NA | 0    | 2  | Low-quality    | Genome-fragment | 1.52  | 0     |
| S4_k141_139493                         |          | 3317  | No  | NA | 0    | 1  | Not-determined | Genome-fragment | NA    | 0     |
| S4_k141_111620                         |          | 1035  | No  | NA | 0    | 0  | Not-determined | Genome-fragment | NA    | 0     |
| S4_k141_14045                          |          | 116   |     |    |      |    |                |                 |       |       |



|                                            |       |     |      |      |    |                |                 |                 |      |       |
|--------------------------------------------|-------|-----|------|------|----|----------------|-----------------|-----------------|------|-------|
| S4_k141_83852                              | 5210  | No  | NA   | 0    | 2  | Not-determined | Genome-fragment | NA              | 0    |       |
| S4_k141_160450                             | 4408  | No  | NA   | 0    | 1  | Not-determined | Genome-fragment | NA              | 0    |       |
| S4_k141_125676                             | 1891  | No  | NA   | 0    | 1  | Not-determined | Genome-fragment | NA              | 0    |       |
| S3_k141_49780                              | 5706  | No  | NA   | 1    | 0  | Low-quality    | Genome-fragment | 10.03           | 0    |       |
| S4_k141_83873                              | 6305  | No  | NA   | 0    | 2  | Not-determined | Genome-fragment | NA              | 0    |       |
| S4_k141_63022                              | 1460  | No  | NA   | 0    | 1  | Not-determined | Genome-fragment | NA              | 0    |       |
| S4_k141_83877                              | 1159  | No  | NA   | 0    | 1  | Not-determined | Genome-fragment | NA              | 0    |       |
| S17-final-viral-combined_k141_262940  full | 5706  | No  | NA   | 0    | 4  | Low-quality    | Genome-fragment | 0.99            | 0    |       |
| S4_k141_21150                              | 1398  | No  | NA   | 0    | 0  | Not-determined | Genome-fragment | NA              | 0    |       |
| S4_k141_104820                             | 1064  | No  | NA   | 0    | 0  | Not-determined | Genome-fragment | NA              | 0    |       |
| S8_k141_37068                              | 5707  | No  | NA   | 1    | 0  | Low-quality    | Genome-fragment | 8.72            | 0    |       |
| S4_k141_118563                             | 2914  | No  | NA   | 0    | 1  | Not-determined | Genome-fragment | NA              | 0    |       |
| S4_k141_70046                              | 2176  | No  | NA   | 0    | 1  | Not-determined | Genome-fragment | NA              | 0    |       |
| S4_k141_28139                              | 1778  | No  | NA   | 0    | 0  | Not-determined | Genome-fragment | NA              | 0    |       |
| S1-final-viral-combined_k141_390923  full  | 5709  | No  | NA   | 0    | 0  | Low-quality    | Genome-fragment | 4.25            | 0    |       |
| S4_k141_104841                             | 2508  | No  | NA   | 0    | 0  | Not-determined | Genome-fragment | NA              | 0    |       |
| S4_k141_104844                             | 1124  | No  | NA   | 0    | 1  | Not-determined | Genome-fragment | NA              | 0    |       |
| S4_k141_83912                              | 1180  | No  | NA   | 0    | 1  | Not-determined | Genome-fragment | NA              | 0    |       |
| S4-final-viral-combined_k141_163189  full  | 5709  | No  | NA   | 0    | 1  | Low-quality    | Genome-fragment | 9.71            | 0    |       |
| S4_k141_28162                              | 1586  | No  | NA   | 0    | 2  | Not-determined | Genome-fragment | NA              | 0    |       |
| S4_k141_76939                              | 1074  | No  | NA   | 0    | 1  | Not-determined | Genome-fragment | NA              | 0    |       |
| S4_k141_146128                             | 1183  | No  | NA   | 0    | 1  | Not-determined | Genome-fragment | NA              | 0    |       |
| S4_k141_28174                              | 1030  | No  | NA   | 0    | 1  | Not-determined | Genome-fragment | NA              | 0    |       |
| S4_k141_7282                               | 1304  | No  | NA   | 0    | 0  | Not-determined | Genome-fragment | NA              | 0    |       |
| S4_k141_132656                             | 1019  | No  | NA   | 0    | 0  | Not-determined | Genome-fragment | NA              | 0    |       |
| S4_k141_56014                              | 1151  | No  | NA   | 0    | 0  | Not-determined | Genome-fragment | NA              | 0    |       |
| S4_k141_28204                              | 1805  | No  | NA   | 0    | 0  | Not-determined | Genome-fragment | NA              | 0    |       |
| S4_k141_76996                              | 1073  | No  | NA   | 0    | 1  | Not-determined | Genome-fragment | NA              | 0    |       |
| S4-final-viral-combined_k141_120668  full  | 5711  | No  | NA   | 2    | 1  | Low-quality    | Genome-fragment | 11.03           | 0    |       |
| S4_k141_28224                              | 1227  | No  | NA   | 0    | 0  | Not-determined | Genome-fragment | NA              | 0    |       |
| S4_k141_146590                             | 1172  | No  | NA   | 0    | 1  | Not-determined | Genome-fragment | NA              | 0    |       |
| S4_k141_28217                              | 2002  | No  | NA   | 0    | 0  | Not-determined | Genome-fragment | NA              | 0    |       |
| S4_k141_56065                              | 1281  | No  | NA   | 0    | 0  | Not-determined | Genome-fragment | NA              | 0    |       |
| S1-final-viral-combined_k141_191034  full  | 5712  | No  | NA   | 1    | 1  | Low-quality    | Genome-fragment | 17.1            | 0    |       |
| S17-final-viral-combined_k141_22808  full  | 5714  | No  | NA   | 0    | 3  | Low-quality    | Genome-fragment | 4.37            | 0    |       |
| S4_k141_118980                             | 17812 | No  | NA   | 11   | 7  | Medium-quality | Genome-fragment | 74.83           | 0    |       |
| S4_k141_42197                              | 1168  | No  | NA   | 0    | 0  | Not-determined | Genome-fragment | NA              | 0    |       |
| S4_k141_91054                              | 1216  | No  | NA   | 0    | 2  | Not-determined | Genome-fragment | NA              | 0    |       |
| S4_k141_14333                              | 2151  | No  | NA   | 0    | 0  | Not-determined | Genome-fragment | NA              | 0    |       |
| S4_k141_125815                             | 1065  | No  | NA   | 0    | 0  | Not-determined | Genome-fragment | NA              | 0    |       |
| S4_k141_125817                             | 1267  | No  | NA   | 0    | 0  | Not-determined | Genome-fragment | NA              | 0    |       |
| S17-final-viral-combined_k141_56513  full  | 5714  | No  | NA   | 0    | 2  | Low-quality    | Genome-fragment | 14.29           | 0    |       |
| S4_k141_84029                              | 1736  | No  | NA   | 0    | 1  | Not-determined | Genome-fragment | NA              | 0    |       |
| S4_k141_132701                             | 1090  | No  | NA   | 0    | 3  | Not-determined | Genome-fragment | NA              | 0    |       |
| S4_k141_63156                              | 1102  | No  | NA   | 0    | 1  | Not-determined | Genome-fragment | NA              | 0    |       |
| S4_k141_146656                             | 5007  | No  | NA   | 0    | 2  | Not-determined | Genome-fragment | NA              | 0    |       |
| S12_k141_379594                            | 5715  | No  | NA   | 0    | 3  | Low-quality    | Genome-fragment | 12.3            | 0    |       |
| S4_k141_132718                             | 1079  | No  | NA   | 0    | 0  | Not-determined | Genome-fragment | NA              | 0    |       |
| S4_k141_21306                              | 2547  | No  | NA   | 0    | 4  | Not-determined | Genome-fragment | NA              | 0    |       |
| S4_k141_14363                              | 1002  | No  | NA   | 0    | 1  | Not-determined | Genome-fragment | NA              | 0    |       |
| S2-final-viral-combined_k141_155210  full  | 5716  | No  | NA   | 0    | 2  | Low-quality    | Genome-fragment | 5.42            | 0    |       |
| S4_k141_118729                             | 6041  | No  | NA   | 0    | 1  | Not-determined | Genome-fragment | NA              | 0    |       |
| S11-final-viral-combined_k141_288119  full | 5717  | No  | NA   | 1    | 0  | Low-quality    | Genome-fragment | 3.64            | 0    |       |
| S1_k141_164086                             | 5719  | No  | NA   | 2    | 0  | Low-quality    | Genome-fragment | 12.34           | 0    |       |
| S4_k141_132728                             | 1109  | No  | NA   | 0    | 0  | Not-determined | Genome-fragment | NA              | 0    |       |
| S4_k141_100961                             | 5720  | No  | NA   | 7    | 1  | Low-quality    | Genome-fragment | 3.3             | 0    |       |
| S4_k141_77155                              | 1886  | No  | NA   | 0    | 1  | Not-determined | Genome-fragment | NA              | 0    |       |
| S4_k141_21336                              | 1355  | No  | NA   | 0    | 1  | Not-determined | Genome-fragment | NA              | 0    |       |
| S4_k141_7342                               | 3178  | No  | NA   | 0    | 0  | Not-determined | Genome-fragment | NA              | 0    |       |
| S4_k141_97975                              | 1388  | No  | NA   | 0    | 0  | Not-determined | Genome-fragment | NA              | 0    |       |
| S9-final-viral-combined_k141_95813  full   | 5721  | No  | NA   | 0    | 5  | Low-quality    | Genome-fragment | 5.37            | 0    |       |
| S7-final-viral-combined_k141_43196  full   | 5721  | No  | NA   | 0    | 4  | Low-quality    | Genome-fragment | 4.62            | 0    |       |
| S4_k141_7362                               | 1082  | No  | NA   | 0    | 1  | Not-determined | Genome-fragment | NA              | 0    |       |
| S4_k141_139826                             | 1128  | No  | NA   | 0    | 0  | Not-determined | Genome-fragment | NA              | 0    |       |
| S4_k141_77186                              | 1108  | No  | NA   | 0    | 1  | Not-determined | Genome-fragment | NA              | 0    |       |
| S4_k141_28371                              | 1349  | No  | NA   | 0    | 2  | Not-determined | Genome-fragment | NA              | 0    |       |
| S4-final-viral-combined_k141_153396  full  | 5722  | No  | NA   | 1    | 0  | Low-quality    | Genome-fragment | 11.61           | 0    |       |
| S1-final-viral-combined_k141_139765  full  | 5724  | No  | NA   | 2    | 0  | Low-quality    | Genome-fragment | 8.86            | 0    |       |
| S4_k141_70242                              | 7741  | No  | NA   | 0    | 0  | Not-determined | Genome-fragment | NA              | 0    |       |
| S4_k141_125962                             | 6207  | No  | NA   | 0    | 0  | Not-determined | Genome-fragment | NA              | 0    |       |
| S4_k141_35152                              | 1188  | No  | NA   | 0    | 2  | Not-determined | Genome-fragment | NA              | 0    |       |
| S4_k141_622                                | 7282  | No  | NA   | 0    | 0  | Not-determined | Genome-fragment | NA              | 0    |       |
| S8_k141_34068                              | 5724  | No  | NA   | 3    | 0  | Low-quality    | Genome-fragment | 10.32           | 0    |       |
| S1-final-viral-combined_k141_205793  full  | 5725  | No  | NA   | 0    | 2  | Low-quality    | Genome-fragment | 14.37           | 0    |       |
| S7-final-viral-combined_k141_117601  full  | 5725  | No  | NA   | 1    | 1  | Low-quality    | Genome-fragment | 6.05            | 0    |       |
| S12-final-viral-combined_k141_70770  full  | 5726  | No  | NA   | 2    | 0  | Low-quality    | Genome-fragment | 14.95           | 0    |       |
| S4_k141_49136                              | 1060  | No  | NA   | 0    | 1  | Not-determined | Genome-fragment | NA              | 0    |       |
| S6_k141_89986                              | 5726  | Yes | NA   | 1614 | 2  | 2              | Low-quality     | Genome-fragment | 0.49 | 71.81 |
| S1-final-viral-combined_k141_15107  full   | 5727  | No  | NA   | 0    | 2  | Low-quality    | Genome-fragment | 5.4             | 0    |       |
| S11-final-viral-combined_k141_133825  full | 5729  | No  | NA   | 0    | 0  | Low-quality    | Genome-fragment | 11.27           | 0    |       |
| S4_k141_14409                              | 1555  | No  | NA   | 0    | 0  | Not-determined | Genome-fragment | NA              | 0    |       |
| S5_k141_71869                              | 5729  | No  | NA   | 0    | 1  | Low-quality    | Genome-fragment | 9.57            | 0    |       |
| S4_k141_118807                             | 27982 | No  | NA   | 0    | 11 | Not-determined | Genome-fragment | NA              | 0    |       |
| S4_k141_63233                              | 1064  | No  | NA   | 0    | 1  | Not-determined | Genome-fragment | NA              | 0    |       |
| S4_k141_160747                             | 1202  | No  | NA   | 0    | 2  | Not-determined | Genome-fragment | NA              | 0    |       |
| S4_k141_91248                              | 1497  | No  | NA   | 0    | 1  | Not-determined | Genome-fragment | NA              | 0    |       |
| S4_k141_126019                             | 1406  | No  | NA   | 0    | 2  | Not-determined | Genome-fragment | NA              | 0    |       |
| S4_k141_49180                              | 3664  | No  | NA   | 0    | 1  | Not-determined | Genome-fragment | NA              | 0    |       |
| S4_k141_56132                              | 2451  | No  | NA   | 0    | 0  | Not-determined | Genome-fragment | NA              | 0    |       |
| S7-final-viral-combined_k141_180710  full  | 5730  | No  | NA   | 0    | 0  | Low-quality    | Genome-fragment | 2.4             | 0    |       |
| S4_k141_160779                             | 1630  | No  | NA   | 0    | 0  | Not-determined | Genome-fragment | NA              | 0    |       |
| S4_k141_56142                              | 1341  | No  | NA   | 0    | 0  | Not-determined | Genome-fragment | NA              | 0    |       |
| S12-final-viral-combined_k141_295685  full | 5730  | No  | NA   | 0    | 1  | Low-quality    | Genome-fragment | 3.59            | 0    |       |
| S4_k141_146789                             | 5458  | No  | NA   | 0    | 3  | Not-determined | Genome-fragment | NA              | 0    |       |
| S11-final-viral-combined_k141_95589  full  | 5731  | No  | NA   | 3    | 1  | Low-quality    | Genome-fragment | 13.25           | 0    |       |
| S4_k141_77308                              | 1007  | No  | NA   | 0    | 0  | Not-determined | Genome-fragment | NA              | 0    |       |
| S4_k141_14457                              | 1301  | No  | NA   | 0    | 1  | Not-determined | Genome-fragment | NA              | 0    |       |
| S4_k141_118875                             | 1284  | No  | NA   | 0    | 1  | Not-determined | Genome-fragment | NA              | 0    |       |
| S4_k141_49145                              | 2187  | No  | NA   | 0    | 2  | Not-determined | Genome-fragment | NA              | 0    |       |
| S4_k141_49247                              | 1907  | No  | NA   | 0    | 1  | Not-determined | Genome-fragment | NA              | 0    |       |
| S4_k141_132850                             | 3326  | No  | NA   | 0    | 4  | Not-determined | Genome-fragment | NA              | 0    |       |
| S2-final-viral-combined_k141_49196  full   | 5732  | No  | NA   | 2    | 0  | Low-quality    | Genome-fragment | 7.06            | 0    |       |
| S2-final-viral-combined_k141_47327  full   | 5734  | Yes | NA   | 3365 | 1  | 2              | Low-quality     | Genome-fragment | 1.43 | 41.31 |
| S4_k141_84257                              | 2687  | No  | NA   | 0    | 2  | Not-determined | Genome-fragment | NA              | 0    |       |
| S4_k141_84240                              | 1042  | No  | NA   | 0    | 1  | Not-determined | Genome-fragment | NA              | 0    |       |
| S7-final-viral-combined_k141_218664  full  | 5736  | No  | NA   | 1    | 0  | Low-quality    | Genome-fragment | 10.32           | 0    |       |
| S1_k141_137680                             | 5738  | Yes | NA   | 3392 | 1  | 2              | Low-quality     | Genome-fragment | 4.2  | 40.89 |
| S4_k141_91343                              | 1351  | No  | NA   | 0    | 1  | Not-determined | Genome-fragment | NA              | 0    |       |
| S4_k141_28520                              | 7453  | No  | NA   | 0    | 1  | Not-determined | Genome-fragment | NA              | 0    |       |
| S4_k141_7476                               | 1515  | No  | NA   | 0    | 2  | Not-determined | Genome-fragment | NA              | 0    |       |
| S4_k141_77399                              | 1263  | No  | NA   | 0    | 1  | Not-determined | Genome-fragment | NA              | 0    |       |
| S4_k141_153774                             | 1582  | No  | NA   | 0    | 0  | Not-determined | Genome-fragment | NA              | 0    |       |
| S17-final-viral-combined_k141_246097  full | 5739  | No  | NA   | 0    | 2  | Low-quality    | Genome-fragment | 1.78            | 0    |       |
| S4_k141_105169                             | 1350  | No  | NA   | 0    | 1  | Not-determined | Genome-fragment | NA              | 0    |       |
| S4_k141_771                                | 1901  | No  | NA   | 0    | 3  | Not-determined | Genome-fragment | NA              | 0    |       |
| S4_k141_146886                             | 1119  | No  | NA   | 0    | 0  | Not-determined | Genome-fragment | NA              | 0    |       |
| S4_k141_91382                              | 1303  | No  | NA   | 0    | 2  | Not-determined | Genome-fragment | NA              | 0    |       |
| S6_k141_68687                              | 5740  | No  | NA   | 0    | 0  | Low-quality    | Genome-fragment | 3.07            | 0    |       |
| S4_k141_777                                | 1453  | No  | NA   | 0    | 0  | Not-determined | Genome-fragment | NA              | 0    |       |
| S4_k141_126199                             | 1407  | No  | NA   | 0    | 2  | Not-determined | Genome-fragment | NA              | 0    |       |
| S4_k141_132474                             | 1476  | No  | NA   | 0    | 1  | Not-determined | Genome-fragment | NA              | 0    |       |
| S4_k141_49308                              | 4174  | No  | NA   | 0    | 1  | Not-determined | Genome-fragment | NA              | 0    |       |
| S4_k141_112161                             | 1790  | No  | NA   | 0    | 1  | Not-determined | Genome-fragment | NA              | 0    |       |
| S4_k141_126205                             | 5430  | No  | NA   | 0    | 1  | Not-determined | Genome-fragment | NA              | 0    |       |
| S7-final-viral-combined_k141_158695  full  | 5741  | No  | NA   | 0    | 0  | Low-quality    | Genome-fragment | 5.96            | 0    |       |
| S4_k141_91401                              | 1227  | No  | NA   | 0    | 1  | Not-determined | Genome-fragment | NA              | 0    |       |
| S4_k141_105224                             | 1198  | No  | NA   | 0    | 1  | Not-determined | Genome-fragment | NA              | 0    |       |
| S4_k141_28550                              | 1252  | No  | NA   | 0    | 1  | Not-determined | Genome-fragment | NA              | 0    |       |
| S4_k141_14521                              | 2751  | No  | NA   | 0    | 1  | Not-determined | Genome-fragment | NA              | 0    |       |
| S4_k141_14522                              | 1080  | No  | NA   | 0    | 1  | Not-determined | Genome-fragment | NA              | 0    |       |
| S4_k141_146916                             | 1201  | No  | NA   | 0    | 1  | Not-determined | Genome-fragment | NA              | 0    |       |
| S4_k141_153833                             | 3251  | No  | NA   | 0    | 0  | Not-determined | Genome-fragment | NA              | 0    |       |
| S4_k141_153838                             | 1404  | No  | NA   | 0    | 1  | Not-determined | Genome-fragment | NA              | 0    |       |
| S4_k141_795                                | 1834  | No  | NA   | 0    | 3  | Not-determined | Genome-fragment | NA              | 0    |       |
| S4_k141_21575                              | 3156  | No  | NA   | 0    | 3  | Not-determined | Genome-fragment | NA              | 0    |       |
| S4_k141_21583                              | 1142  | No  | NA   | 0    | 1  | Not-determined | Genome-fragment | NA              | 0    |       |
| S4_k141_84391                              | 1124  | No  | NA   | 0    | 1  | Not-determined | Genome-fragment | NA              | 0    |       |
| S17-k141_250663                            | 5742  | No  | NA   | 0    | 0  | Low-quality    | Genome-fragment | 3.51            | 0    |       |
| S4_k141_42519                              | 1187  | No  | NA   | 0    | 2  | Not-determined | Genome-fragment | NA              | 0    |       |
| S4_k141_821                                | 5378  | No  | NA   | 0    | 0  | Not-determined | Genome-fragment | NA              | 0    |       |
| S4_k141_114894                             | 5746  | No  | NA   | 0    | 3  | Low-quality    | Genome-fragment | 19.92           | 0    |       |
| S4_k141_98264                              | 1213  | No  | NA   | 0    | 1  | Not-determined | Genome-fragment | NA              | 0    |       |
| S11-final-viral-combined_k141_277850  full | 5747  | No  | NA   | 0    | 0  | Low-quality    | Genome-fragment | 13.47           | 0    |       |
| S4_k141_21601                              | 1208  | No  | NA   | 0    | 0  | Not-determined | Genome-fragment | NA              | 0    |       |
| S11-final-viral-combined_k141_61406  full  | 5747  | No  | NA   | 0    | 1  | Low-quality    | Genome-fragment | 6.12            | 0    |       |
| S5-final-viral-combined_k141_3188  full    | 5748  | No  | NA</ |      |    |                |                 |                 |      |       |



|                                            |       |     |    |      |     |                |                 |       |       |
|--------------------------------------------|-------|-----|----|------|-----|----------------|-----------------|-------|-------|
| S4_k141_910                                | 2162  | No  | NA | 0    | 1   | Not-determined | Genome-fragment | NA    | 0     |
| S4_k141_63485                              | 1517  | No  | NA | 0    | 2   | Not-determined | Genome-fragment | NA    | 0     |
| S4_k141_140192                             | 1853  | No  | NA | 0    | 0   | Not-determined | Genome-fragment | NA    | 0     |
| S4_k141_133026                             | 5317  | No  | NA | 0    | 2   | Not-determined | Genome-fragment | NA    | 0     |
| S4_k141_119077                             | 1466  | No  | NA | 0    | 1   | Not-determined | Genome-fragment | NA    | 0     |
| S4_k141_21684                              | 1115  | No  | NA | 0    | 1   | Not-determined | Genome-fragment | NA    | 0     |
| S4_k141_14615                              | 12982 | No  | NA | 0    | 4   | Not-determined | Genome-fragment | NA    | 0     |
| S1-final-viral-combined_k141_302985[full]  | 5758  | No  | NA | 0    | 3   | Low-quality    | Genome-fragment | 5.22  | 0     |
| S4_k141_133055                             | 6623  | No  | NA | 0    | 1   | Not-determined | Genome-fragment | NA    | 0     |
| S4_k141_133070                             | 1164  | No  | NA | 0    | 0   | Not-determined | Genome-fragment | NA    | 0     |
| S4_k141_119111                             | 1088  | No  | NA | 0    | 1   | Not-determined | Genome-fragment | NA    | 0     |
| S4_k141_77540                              | 1021  | No  | NA | 0    | 2   | Not-determined | Genome-fragment | NA    | 0     |
| S4_k141_42676                              | 5407  | No  | NA | 0    | 3   | Not-determined | Genome-fragment | NA    | 0     |
| S7-final-viral-combined_k141_139764[full]  | 5758  | No  | NA | 0    | 1   | Low-quality    | Genome-fragment | 5.6   | 0     |
| S7-final-viral-combined_k141_213614[full]  | 5758  | No  | NA | 3    | 0   | Low-quality    | Genome-fragment | 16.2  | 0     |
| S4_k141_7682                               | 1253  | No  | NA | 0    | 0   | Not-determined | Genome-fragment | NA    | 0     |
| S4_k141_70655                              | 3353  | No  | NA | 0    | 1   | Not-determined | Genome-fragment | NA    | 0     |
| S4_k141_105509                             | 1109  | No  | NA | 0    | 1   | Not-determined | Genome-fragment | NA    | 0     |
| S4_k141_98252                              | 1002  | No  | NA | 0    | 1   | Not-determined | Genome-fragment | NA    | 0     |
| S4_k141_126483                             | 1666  | No  | NA | 0    | 0   | Not-determined | Genome-fragment | NA    | 0     |
| S4_k141_140245                             | 1390  | No  | NA | 0    | 1   | Not-determined | Genome-fragment | NA    | 0     |
| S12-final-viral-combined_k141_109590[full] | 5758  | No  | NA | 7    | 3   | Low-quality    | Genome-fragment | 2.3   | 0     |
| S4_k141_147133                             | 8361  | No  | NA | 0    | 3   | Not-determined | Genome-fragment | NA    | 0     |
| S2_k141_95554                              | 5759  | No  | NA | 4    | 0   | Low-quality    | Genome-fragment | 5.58  | 0     |
| S8-final-viral-combined_k141_244196[full]  | 5761  | No  | NA | 0    | 3   | Low-quality    | Genome-fragment | 7.02  | 0     |
| S4_k141_21701                              | 1177  | No  | NA | 0    | 0   | Not-determined | Genome-fragment | NA    | 0     |
| S4_k141_49448                              | 7461  | No  | NA | 0    | 5   | Not-determined | Genome-fragment | NA    | 0     |
| S17-k141_5812                              | 5763  | No  | NA | 0    | 2   | Low-quality    | Genome-fragment | 2.39  | 0     |
| S4_k141_119184                             | 2144  | No  | NA | 0    | 3   | Not-determined | Genome-fragment | NA    | 0     |
| S4_k141_126561                             | 1052  | No  | NA | 0    | 1   | Not-determined | Genome-fragment | NA    | 0     |
| S4_k141_21723                              | 1671  | No  | NA | 0    | 0   | Not-determined | Genome-fragment | NA    | 0     |
| S4_k141_128834                             | 5049  | No  | NA | 0    | 3   | Not-determined | Genome-fragment | NA    | 0     |
| S4_k141_21741                              | 1292  | No  | NA | 0    | 2   | Not-determined | Genome-fragment | NA    | 0     |
| S4_k141_140303                             | 3319  | No  | NA | 0    | 3   | Not-determined | Genome-fragment | NA    | 0     |
| S2-final-viral-combined_k141_138481[full]  | 5764  | No  | NA | 1    | 0   | Low-quality    | Genome-fragment | 14.26 | 0     |
| S9-final-viral-combined_k141_110452[full]  | 5765  | No  | NA | 0    | 0   | Low-quality    | Genome-fragment | 6.1   | 0     |
| S4_k141_21779                              | 1413  | No  | NA | 0    | 0   | Not-determined | Genome-fragment | NA    | 0     |
| S1-final-viral-combined_k141_194245[full]  | 5767  | No  | NA | 5    | 0   | Low-quality    | Genome-fragment | 13.39 | 0     |
| S9-final-viral-combined_k141_106800[full]  | 5771  | No  | NA | 7    | 0   | Low-quality    | Genome-fragment | 14.41 | 0     |
| S4_k141_140351                             | 1337  | No  | NA | 0    | 1   | Not-determined | Genome-fragment | NA    | 0     |
| S4-final-viral-combined_k141_27156[full]   | 5771  | Yes | NA | 835  | 1   | 4 Low-quality  | Genome-fragment | 1.37  | 85.53 |
| S4_k141_140360                             | 1247  | No  | NA | 0    | 1   | Not-determined | Genome-fragment | NA    | 0     |
| S4_k141_98460                              | 1721  | No  | NA | 0    | 1   | Not-determined | Genome-fragment | NA    | 0     |
| S4_k141_7763                               | 6477  | No  | NA | 0    | 5   | Not-determined | Genome-fragment | NA    | 0     |
| S4_k141_1057                               | 1421  | No  | NA | 0    | 0   | Not-determined | Genome-fragment | NA    | 0     |
| S4_k141_126638                             | 1417  | No  | NA | 0    | 0   | Not-determined | Genome-fragment | NA    | 0     |
| S4_k141_84677                              | 1383  | No  | NA | 0    | 0   | Not-determined | Genome-fragment | NA    | 0     |
| S11_k141_297511                            | 5772  | No  | NA | 0    | 1   | Low-quality    | Genome-fragment | 1.99  | 0     |
| S11_k141_51788                             | 5772  | No  | NA | 0    | 1   | Low-quality    | Genome-fragment | 18.43 | 0     |
| S9_k141_96609                              | 5773  | No  | NA | 3    | 0   | Low-quality    | Genome-fragment | 14.04 | 0     |
| S4_k141_14752                              | 5485  | No  | NA | 0    | 2   | Not-determined | Genome-fragment | NA    | 0     |
| S4_k141_84701                              | 7052  | No  | NA | 0    | 3   | Not-determined | Genome-fragment | NA    | 0     |
| S4_k141_7801                               | 1004  | No  | NA | 0    | 1   | Not-determined | Genome-fragment | NA    | 0     |
| S4_k141_105676                             | 1456  | No  | NA | 0    | 0   | Not-determined | Genome-fragment | NA    | 0     |
| S4_k141_63744                              | 1605  | No  | NA | 0    | 0   | Not-determined | Genome-fragment | NA    | 0     |
| S5-final-viral-combined_k141_13108[full]   | 5774  | No  | NA | 3    | 0   | Low-quality    | Genome-fragment | 14.83 | 0     |
| S4_k141_147299                             | 2207  | No  | NA | 0    | 1   | Not-determined | Genome-fragment | NA    | 0     |
| S4_k141_1083                               | 1114  | No  | NA | 0    | 0   | Not-determined | Genome-fragment | NA    | 0     |
| S4_k141_154264                             | 1221  | No  | NA | 0    | 1   | Not-determined | Genome-fragment | NA    | 0     |
| S4_k141_63749                              | 1741  | No  | NA | 0    | 0   | Not-determined | Genome-fragment | NA    | 0     |
| S4_k141_1090                               | 1267  | No  | NA | 0    | 2   | Not-determined | Genome-fragment | NA    | 0     |
| S4_k141_49489                              | 4710  | No  | NA | 0    | 2   | Not-determined | Genome-fragment | NA    | 0     |
| S4_k141_42840                              | 1122  | No  | NA | 0    | 1   | Not-determined | Genome-fragment | NA    | 0     |
| S4_k141_77769                              | 3261  | No  | NA | 0    | 5   | Not-determined | Genome-fragment | NA    | 0     |
| S4_k141_35684                              | 2126  | No  | NA | 0    | 2   | Not-determined | Genome-fragment | NA    | 0     |
| S4_k141_29010                              | 3604  | No  | NA | 0    | 0   | Not-determined | Genome-fragment | NA    | 0     |
| S4_k141_119358                             | 1020  | No  | NA | 0    | 1   | Not-determined | Genome-fragment | NA    | 0     |
| S4_k141_1127                               | 2385  | No  | NA | 0    | 1   | Not-determined | Genome-fragment | NA    | 0     |
| S1_k141_109044                             | 5776  | Yes | NA | 4745 | 1   | Low-quality    | Genome-fragment | 34.62 | 17.85 |
| S4_k141_56698                              | 1133  | No  | NA | 0    | 1   | Not-determined | Genome-fragment | NA    | 0     |
| S4_k141_35701                              | 1971  | No  | NA | 0    | 2   | Not-determined | Genome-fragment | NA    | 0     |
| S4_k141_35714                              | 1312  | No  | NA | 0    | 2   | Not-determined | Genome-fragment | NA    | 0     |
| S8-final-viral-combined_k141_131782[full]  | 5786  | No  | NA | 7    | 0   | Low-quality    | Genome-fragment | 17.31 | 0     |
| S4_k141_112636                             | 1693  | No  | NA | 0    | 0   | Not-determined | Genome-fragment | NA    | 0     |
| S4_k141_39988                              | 5790  | No  | NA | 0    | 4   | Low-quality    | Genome-fragment | 1.51  | 0     |
| S4_k141_14754                              | 2060  | No  | NA | 0    | 2   | Not-determined | Genome-fragment | NA    | 0     |
| S17-k141_260606                            | 5791  | No  | NA | 2    | 0   | Low-quality    | Genome-fragment | 14.66 | 0     |
| S5-final-viral-combined_k141_89458[full]   | 5792  | No  | NA | 2    | 0   | Low-quality    | Genome-fragment | 6.18  | 0     |
| S4_k141_119171                             | 2204  | No  | NA | 0    | 0   | Not-determined | Genome-fragment | NA    | 0     |
| S4_k141_29043                              | 1565  | No  | NA | 0    | 2   | Not-determined | Genome-fragment | NA    | 0     |
| S9_k141_333                                | 5793  | No  | NA | 1    | 0   | Low-quality    | Genome-fragment | 12.79 | 0     |
| S5-final-viral-combined_k141_139118[full]  | 5794  | No  | NA | 0    | 1   | Low-quality    | Genome-fragment | 11.25 | 0     |
| S4_k141_84794                              | 1030  | No  | NA | 0    | 0   | Not-determined | Genome-fragment | NA    | 0     |
| S4_k141_126768                             | 1542  | No  | NA | 0    | 0   | Not-determined | Genome-fragment | NA    | 0     |
| S4_k141_59810                              | 10059 | No  | NA | 0    | 4   | Not-determined | Genome-fragment | NA    | 0     |
| S4_k141_42946                              | 1646  | No  | NA | 0    | 1   | Not-determined | Genome-fragment | NA    | 0     |
| S4_k141_29071                              | 3848  | No  | NA | 0    | 5   | Not-determined | Genome-fragment | NA    | 0     |
| S4_k141_126776                             | 9989  | No  | NA | 0    | 2   | Not-determined | Genome-fragment | NA    | 0     |
| S4_k141_140238                             | 1864  | No  | NA | 0    | 0   | Not-determined | Genome-fragment | NA    | 0     |
| S1-final-viral-combined_k141_119405[full]  | 5796  | No  | NA | 0    | 2   | Low-quality    | Genome-fragment | 4.66  | 0     |
| S4_k141_119476                             | 3900  | No  | NA | 0    | 1   | Not-determined | Genome-fragment | NA    | 0     |
| S4_k141_42992                              | 1396  | No  | NA | 0    | 0   | Not-determined | Genome-fragment | NA    | 0     |
| S4_k141_91946                              | 1781  | No  | NA | 0    | 1   | Not-determined | Genome-fragment | NA    | 0     |
| S4_k141_147411                             | 5525  | No  | NA | 0    | 1   | Not-determined | Genome-fragment | NA    | 0     |
| S4_k141_56810                              | 1084  | No  | NA | 0    | 1   | Not-determined | Genome-fragment | NA    | 0     |
| S4_k141_56820                              | 1055  | No  | NA | 0    | 1   | Not-determined | Genome-fragment | NA    | 0     |
| S5_k141_198438                             | 5797  | No  | NA | 8    | 0   | Low-quality    | Genome-fragment | 18.11 | 0     |
| S4_k141_35821                              | 1101  | No  | NA | 0    | 1   | Not-determined | Genome-fragment | NA    | 0     |
| S4_k141_77969                              | 1008  | No  | NA | 0    | 0   | Not-determined | Genome-fragment | NA    | 0     |
| S4_k141_63897                              | 1020  | No  | NA | 0    | 1   | Not-determined | Genome-fragment | NA    | 0     |
| S4_k141_14845                              | 1020  | No  | NA | 0    | 0   | Not-determined | Genome-fragment | NA    | 0     |
| S4_k141_133458                             | 2812  | No  | NA | 0    | 2   | Not-determined | Genome-fragment | NA    | 0     |
| S4_k141_154361                             | 1055  | No  | NA | 0    | 1   | Not-determined | Genome-fragment | NA    | 0     |
| S9_k141_89276                              | 5798  | No  | NA | 0    | 2   | Low-quality    | Genome-fragment | 5.37  | 0     |
| S4_k141_154371                             | 1025  | No  | NA | 0    | 0   | Not-determined | Genome-fragment | NA    | 0     |
| S4_k141_78011                              | 1846  | No  | NA | 0    | 0   | Not-determined | Genome-fragment | NA    | 0     |
| S4_k141_119559                             | 1004  | No  | NA | 0    | 0   | Not-determined | Genome-fragment | NA    | 0     |
| S4_k141_35839                              | 1133  | No  | NA | 0    | 0   | Not-determined | Genome-fragment | NA    | 0     |
| S1_k141_213478                             | 5798  | No  | NA | 0    | 0   | Not-determined | Genome-fragment | 3.27  | 0     |
| S4_k141_78051                              | 1858  | No  | NA | 0    | 0   | Not-determined | Genome-fragment | NA    | 0     |
| S4_k141_49566                              | 3530  | No  | NA | 0    | 0   | Not-determined | Genome-fragment | NA    | 0     |
| S12_k141_309577                            | 5799  | No  | NA | 0    | 0   | Low-quality    | Genome-fragment | 3.16  | 0     |
| S6-final-viral-combined_k141_25350[full]   | 5799  | No  | NA | 0    | 0   | Low-quality    | Genome-fragment | 8.98  | 0     |
| S4_k141_63962                              | 1612  | No  | NA | 0    | 1   | Not-determined | Genome-fragment | NA    | 0     |
| S8-final-viral-combined_k141_66841[full]   | 5799  | No  | NA | 2    | 0   | Low-quality    | Genome-fragment | 6.82  | 0     |
| S4_k141_29193                              | 3166  | No  | NA | 0    | 3   | Not-determined | Genome-fragment | NA    | 0     |
| S4_k141_1315                               | 5371  | No  | NA | 0    | 2   | Not-determined | Genome-fragment | NA    | 0     |
| S2-final-viral-combined_k141_62294[full]   | 5800  | No  | NA | 0    | 4   | Low-quality    | Genome-fragment | 2.61  | 0     |
| S4_k141_63994                              | 1047  | No  | NA | 0    | 0   | Not-determined | Genome-fragment | NA    | 0     |
| S4_k141_35870                              | 1061  | No  | NA | 0    | 0   | Not-determined | Genome-fragment | NA    | 0     |
| S4_k141_22053                              | 3988  | No  | NA | 0    | 2   | Not-determined | Genome-fragment | NA    | 0     |
| S3_k141_231555                             | 5801  | No  | NA | 1    | 0   | Low-quality    | Genome-fragment | 10.01 | 0     |
| S4_k141_8144                               | 1022  | No  | NA | 0    | 1   | Not-determined | Genome-fragment | NA    | 0     |
| S4_k141_35914                              | 1179  | No  | NA | 0    | 2   | Not-determined | Genome-fragment | NA    | 0     |
| S4_k141_119590                             | 5982  | No  | NA | 0    | 2   | Not-determined | Genome-fragment | NA    | 0     |
| S4_k141_70958                              | 4004  | No  | NA | 0    | 0   | Not-determined | Genome-fragment | NA    | 0     |
| S4_k141_35923                              | 1789  | No  | NA | 0    | 1   | Not-determined | Genome-fragment | NA    | 0     |
| S4_k141_161286                             | 1291  | No  | NA | 0    | 2   | Not-determined | Genome-fragment | NA    | 0     |
| S4-final-viral-combined_k141_21592[full]   | 5801  | No  | NA | 3    | 0   | Low-quality    | Genome-fragment | 9.52  | 0     |
| S4_k141_92067                              | 4972  | No  | NA | 0    | 0   | Not-determined | Genome-fragment | NA    | 0     |
| S4_k141_147559                             | 9868  | No  | NA | 0    | 5   | Not-determined | Genome-fragment | NA    | 0     |
| S8-final-viral-combined_k141_94121[full]   | 5801  | No  | NA | 1    | 0   | Low-quality    | Genome-fragment | 14.68 | 0     |
| S1_k141_370963                             | 5803  | No  | NA | 0    | 3   | Low-quality    | Genome-fragment | 4.01  | 0     |
| S4_k141_49678                              | 1150  | No  | NA | 0    | 1   | Not-determined | Genome-fragment | NA    | 0     |
| S12-final-viral-combined_k141_212946[full] | 5803  | No  | NA | 2    | 0   | Low-quality    | Genome-fragment | 3.38  | 0     |
| S4_k141_147570                             | 7681  | No  | NA | 0    | 6   | Not-determined | Genome-fragment | NA    | 0     |
| S4_k141_161322                             | 1123  | No  | NA | 0    | 1   | Not-determined | Genome-fragment | NA    | 0     |
| S4_k141_1396                               | 1477  | No  | NA | 0    | 1   | Not-determined | Genome-fragment | NA    | 0     |
| S11-final-viral-combined_k141_37477[full]  | 5805  | No  | NA | 0    | 4   | Low-quality    | Genome-fragment | 5.03  | 0     |
| S4_k141_43036                              | 1016  | No  | NA | 0    | 0   | Not-determined | Genome-fragment | NA    | 0     |
| S4_k141_64059                              | 1744  | No  | NA | 0    | 0   | Not-determined | Genome-fragment | NA    | 0     |
| S5_k141_28473                              | 5807  | No  | NA | 0    | 1   | Low-quality    | Genome-fragment | 2.91  | 0     |
| S4_k141_140815                             | 1102  | No  | NA | 0    | 1   | Not-determined | Genome-fragment | NA    | 0     |
| S4_k141_119565                             | 1136  | No  | NA | 0    | 1   | Not-determined | Genome-fragment | NA    | 0     |
| S4_k141_71042                              | 4815  | No  | NA | 0    | 1   | Not-determined | Genome-fragment | NA    | 0     |
| S4_k141_84995                              | 1414  | No  | NA | 0    | 1   | Not-determined | Genome-fragment | NA    | 0     |
| S4_k141_85010                              | 1404  | No  | NA | 0    | 1</ |                |                 |       |       |



|                                            |       |     |    |   |   |                |                 |       |       |
|--------------------------------------------|-------|-----|----|---|---|----------------|-----------------|-------|-------|
| S4_k141_112912                             | 2247  | No  | NA | 0 | 1 | Not-determined | Genome-fragment | NA    | 0     |
| S4_k141_147709                             | 1705  | No  | NA | 0 | 2 | Not-determined | Genome-fragment | NA    | 0     |
| S4_k141_154737                             | 2071  | No  | NA | 0 | 1 | Not-determined | Genome-fragment | NA    | 0     |
| S2-final-viral-combined_k141_162748  full  | 5822  | No  | NA | 1 | 0 | Low-quality    | Genome-fragment | 9.91  | 0     |
| S4_k141_133804                             | 1118  | No  | NA | 0 | 0 | Not-determined | Genome-fragment | NA    | 0     |
| S4_k141_43220                              | 10078 | No  | NA | 0 | 0 | Not-determined | Genome-fragment | NA    | 0     |
| S4_k141_161540                             | 1036  | No  | NA | 0 | 0 | Not-determined | Genome-fragment | NA    | 0     |
| S17-final-viral-combined_k141_70037  full  | 5824  | No  | NA | 1 | 0 | Low-quality    | Genome-fragment | 8.38  | 0     |
| S4_k141_22222                              | 1145  | No  | NA | 0 | 2 | Not-determined | Genome-fragment | NA    | 0     |
| S4_k141_1585                               | 5263  | No  | NA | 0 | 2 | Not-determined | Genome-fragment | NA    | 0     |
| S4_k141_161550                             | 5346  | No  | NA | 0 | 2 | Not-determined | Genome-fragment | NA    | 0     |
| S4_k141_1590                               | 1041  | No  | NA | 0 | 0 | Not-determined | Genome-fragment | NA    | 0     |
| S4_k141_64257                              | 1536  | No  | NA | 0 | 0 | Not-determined | Genome-fragment | NA    | 0     |
| S4_k141_106182                             | 1624  | No  | NA | 0 | 1 | Not-determined | Genome-fragment | NA    | 0     |
| S4_k141_133848                             | 1729  | No  | NA | 0 | 2 | Not-determined | Genome-fragment | NA    | 0     |
| S4_k141_29548                              | 1117  | No  | NA | 0 | 0 | Not-determined | Genome-fragment | NA    | 0     |
| S4_k141_49940                              | 1400  | No  | NA | 0 | 0 | Not-determined | Genome-fragment | NA    | 0     |
| S4_k141_22271                              | 4615  | No  | NA | 0 | 4 | Not-determined | Genome-fragment | NA    | 0     |
| S4_k141_85208                              | 1892  | No  | NA | 0 | 2 | Not-determined | Genome-fragment | NA    | 0     |
| S4_k141_99008                              | 4226  | No  | NA | 0 | 1 | Not-determined | Genome-fragment | NA    | 0     |
| S4_k141_161584                             | 1155  | No  | NA | 0 | 1 | Not-determined | Genome-fragment | NA    | 0     |
| S4_k141_59012                              | 1744  | No  | NA | 0 | 1 | Not-determined | Genome-fragment | NA    | 0     |
| S4_k141_1622                               | 3461  | No  | NA | 0 | 0 | Not-determined | Genome-fragment | NA    | 0     |
| S8-final-viral-combined_k141_60351  full   | 5825  | No  | NA | 5 | 0 | Low-quality    | Genome-fragment | 16.11 | 0     |
| S4_k141_1625                               | 1239  | No  | NA | 0 | 1 | Not-determined | Genome-fragment | NA    | 0     |
| S1-final-viral-combined_k141_35711  full   | 5827  | No  | NA | 0 | 1 | Low-quality    | Genome-fragment | 37.72 | 0     |
| S4_k141_57230                              | 1149  | No  | NA | 0 | 0 | Not-determined | Genome-fragment | NA    | 0     |
| S4_k141_57231                              | 1013  | No  | NA | 0 | 0 | Not-determined | Genome-fragment | NA    | 0     |
| S4_k141_147829                             | 1501  | No  | NA | 0 | 0 | Not-determined | Genome-fragment | NA    | 0     |
| S8_k141_239141                             | 5827  | No  | NA | 0 | 4 | Low-quality    | Genome-fragment | 9.65  | 0     |
| S4_k141_119863                             | 1111  | No  | NA | 0 | 0 | Not-determined | Genome-fragment | NA    | 0     |
| S4_k141_43311                              | 1001  | No  | NA | 0 | 0 | Not-determined | Genome-fragment | NA    | 0     |
| S4_k141_29620                              | 4694  | No  | NA | 0 | 0 | Not-determined | Genome-fragment | NA    | 0     |
| S4_k141_127217                             | 1602  | No  | NA | 0 | 1 | Not-determined | Genome-fragment | NA    | 0     |
| S4_k141_99068                              | 3286  | No  | NA | 0 | 0 | Not-determined | Genome-fragment | NA    | 0     |
| S17-final-viral-combined_k141_34627  full  | 5829  | No  | NA | 0 | 1 | Low-quality    | Genome-fragment | 14.26 | 0     |
| S4_k141_1649                               | 4036  | No  | NA | 0 | 1 | Not-determined | Genome-fragment | NA    | 0     |
| S11-final-viral-combined_k141_186370  full | 5831  | No  | NA | 3 | 0 | Low-quality    | Genome-fragment | 12.13 | 0     |
| S11_k141_141828                            | 5831  | No  | NA | 0 | 0 | Low-quality    | Genome-fragment | 6.06  | 0     |
| S4_k141_78472                              | 1245  | No  | NA | 0 | 1 | Not-determined | Genome-fragment | NA    | 0     |
| S4_k141_99078                              | 1639  | No  | NA | 0 | 2 | Not-determined | Genome-fragment | NA    | 0     |
| S4_k141_1670                               | 10554 | No  | NA | 0 | 4 | Not-determined | Genome-fragment | NA    | 0     |
| S4_k141_106292                             | 3327  | No  | NA | 0 | 3 | Not-determined | Genome-fragment | NA    | 0     |
| S4_k141_127259                             | 5810  | No  | NA | 0 | 1 | Not-determined | Genome-fragment | NA    | 0     |
| S4_k141_1672                               | 11663 | No  | NA | 0 | 4 | Not-determined | Genome-fragment | NA    | 0     |
| S4_k141_131109                             | 1740  | No  | NA | 0 | 2 | Not-determined | Genome-fragment | NA    | 0     |
| S1_k141_165343                             | 5831  | No  | NA | 4 | 0 | Low-quality    | Genome-fragment | 18.53 | 0     |
| S4_k141_1685                               | 5107  | No  | NA | 0 | 1 | Not-determined | Genome-fragment | NA    | 0     |
| S4_k141_155982                             | 13252 | No  | NA | 0 | 1 | Not-determined | Genome-fragment | NA    | 0     |
| S4_k141_71334                              | 1126  | No  | NA | 0 | 1 | Not-determined | Genome-fragment | NA    | 0     |
| S4_k141_131338                             | 1119  | No  | NA | 0 | 0 | Not-determined | Genome-fragment | NA    | 0     |
| S4_k141_64212                              | 9719  | No  | NA | 0 | 6 | Not-determined | Genome-fragment | NA    | 0     |
| S4_k141_1701                               | 1539  | No  | NA | 0 | 1 | Not-determined | Genome-fragment | NA    | 0     |
| S4_k141_154880                             | 1074  | No  | NA | 0 | 1 | Not-determined | Genome-fragment | NA    | 0     |
| S4_k141_15379                              | 2927  | No  | NA | 0 | 1 | Not-determined | Genome-fragment | NA    | 0     |
| S4_k141_78524                              | 1060  | No  | NA | 0 | 1 | Not-determined | Genome-fragment | NA    | 0     |
| S4_k141_1717                               | 1264  | No  | NA | 0 | 0 | Not-determined | Genome-fragment | NA    | 0     |
| S17-final-viral-combined_k141_89480  full  | 5831  | No  | NA | 0 | 0 | Low-quality    | Genome-fragment | 11.5  | 0     |
| S12_k141_252781                            | 5832  | No  | NA | 0 | 1 | Low-quality    | Genome-fragment | 4.13  | 0     |
| S4_k141_154889                             | 4455  | No  | NA | 0 | 4 | Not-determined | Genome-fragment | NA    | 0     |
| S4_k141_71365                              | 1757  | No  | NA | 0 | 0 | Not-determined | Genome-fragment | NA    | 0     |
| S8_k141_127532                             | 5832  | No  | NA | 0 | 0 | Low-quality    | Genome-fragment | 11.02 | 0     |
| S7-final-viral-combined_k141_26873  full   | 5833  | No  | NA | 3 | 0 | Low-quality    | Genome-fragment | 14.87 | 0     |
| S4_k141_64340                              | 1535  | No  | NA | 0 | 3 | Not-determined | Genome-fragment | NA    | 0     |
| S4_k141_141132                             | 5980  | No  | NA | 0 | 6 | Not-determined | Genome-fragment | NA    | 0     |
| S4_k141_147902                             | 1581  | No  | NA | 0 | 1 | Not-determined | Genome-fragment | NA    | 0     |
| S4_k141_161698                             | 2029  | No  | NA | 0 | 1 | Not-determined | Genome-fragment | NA    | 0     |
| S4_k141_99212                              | 1281  | No  | NA | 0 | 0 | Not-determined | Genome-fragment | NA    | 0     |
| S7-final-viral-combined_k141_205914  full  | 5834  | No  | NA | 1 | 0 | Low-quality    | Genome-fragment | 37.71 | 0     |
| S4_k141_161727                             | 1010  | No  | NA | 0 | 1 | Not-determined | Genome-fragment | NA    | 0     |
| S8-final-viral-combined_k141_21844  full   | 5838  | No  | NA | 0 | 1 | Low-quality    | Genome-fragment | 8.95  | 0     |
| S4_k141_85430                              | 3167  | No  | NA | 0 | 2 | Not-determined | Genome-fragment | NA    | 0     |
| S4_k141_106387                             | 2304  | No  | NA | 0 | 1 | Not-determined | Genome-fragment | NA    | 0     |
| S11-final-viral-combined_k141_34596  full  | 5840  | Yes | NA | 1 | 2 | Low-quality    | Genome-fragment | 8.25  | 22.19 |
| S8-final-viral-combined_k141_21737  full   | 5842  | No  | NA | 0 | 0 | Low-quality    | Genome-fragment | 12.73 | 0     |
| S2-final-viral-combined_k141_115240  full  | 5843  | No  | NA | 4 | 0 | Low-quality    | Genome-fragment | 13.93 | 0     |
| S4_k141_29784                              | 1140  | No  | NA | 0 | 0 | Not-determined | Genome-fragment | NA    | 0     |
| S4_k141_29802                              | 1023  | No  | NA | 0 | 0 | Not-determined | Genome-fragment | NA    | 0     |
| S17-final-viral-combined_k141_122833  full | 5844  | No  | NA | 2 | 0 | Low-quality    | Genome-fragment | 12.52 | 0     |
| S8_k141_171482                             | 5845  | No  | NA | 0 | 1 | Low-quality    | Genome-fragment | 3.36  | 0     |
| S4_k141_134046                             | 1103  | No  | NA | 0 | 1 | Not-determined | Genome-fragment | NA    | 0     |
| S4_k141_85454                              | 1099  | No  | NA | 0 | 0 | Not-determined | Genome-fragment | NA    | 0     |
| S6-final-viral-combined_k141_103750  full  | 5846  | No  | NA | 0 | 5 | Low-quality    | Genome-fragment | 15.02 | 0     |
| S4_k141_106447                             | 2848  | No  | NA | 0 | 0 | Not-determined | Genome-fragment | NA    | 0     |
| S4_k141_155009                             | 1857  | No  | NA | 0 | 0 | Not-determined | Genome-fragment | NA    | 0     |
| S4_k141_64493                              | 1040  | No  | NA | 0 | 0 | Not-determined | Genome-fragment | NA    | 0     |
| S4_k141_99286                              | 1295  | No  | NA | 0 | 0 | Not-determined | Genome-fragment | NA    | 0     |
| S1_k141_393055                             | 5848  | No  | NA | 1 | 0 | Low-quality    | Genome-fragment | 4.35  | 0     |
| S4_k141_1361                               | 1638  | No  | NA | 0 | 1 | Not-determined | Genome-fragment | NA    | 0     |
| S4_k141_147981                             | 2726  | No  | NA | 0 | 3 | Not-determined | Genome-fragment | NA    | 0     |
| S4_k141_155038                             | 1320  | No  | NA | 0 | 1 | Not-determined | Genome-fragment | NA    | 0     |
| S4_k141_15516                              | 1039  | No  | NA | 0 | 0 | Not-determined | Genome-fragment | NA    | 0     |
| S4_k141_64508                              | 11116 | No  | NA | 0 | 5 | Not-determined | Genome-fragment | NA    | 0     |
| S4_k141_106474                             | 4734  | No  | NA | 0 | 3 | Not-determined | Genome-fragment | NA    | 0     |
| S4_k141_1878                               | 1331  | No  | NA | 0 | 0 | Not-determined | Genome-fragment | NA    | 0     |
| S4_k141_64531                              | 6256  | No  | NA | 0 | 1 | Not-determined | Genome-fragment | NA    | 0     |
| S4_k141_64533                              | 1142  | No  | NA | 0 | 0 | Not-determined | Genome-fragment | NA    | 0     |
| S6-final-viral-combined_k141_128260  full  | 5848  | No  | NA | 1 | 0 | Low-quality    | Genome-fragment | 16.18 | 0     |
| S4_k141_64534                              | 1251  | No  | NA | 0 | 1 | Not-determined | Genome-fragment | NA    | 0     |
| S8-final-viral-combined_k141_10019  full   | 5848  | No  | NA | 2 | 0 | Low-quality    | Genome-fragment | 42.11 | 0     |
| S4_k141_127427                             | 1256  | No  | NA | 0 | 1 | Not-determined | Genome-fragment | NA    | 0     |
| S4_k141_155085                             | 9541  | No  | NA | 0 | 7 | Not-determined | Genome-fragment | NA    | 0     |
| S4_k141_36412                              | 4111  | No  | NA | 0 | 4 | Not-determined | Genome-fragment | NA    | 0     |
| S4_k141_1904                               | 1629  | No  | NA | 0 | 1 | Not-determined | Genome-fragment | NA    | 0     |
| S4_k141_71505                              | 4946  | No  | NA | 0 | 1 | Not-determined | Genome-fragment | NA    | 0     |
| S4_k141_113326                             | 2319  | No  | NA | 0 | 3 | Not-determined | Genome-fragment | NA    | 0     |
| S4_k141_43587                              | 1513  | No  | NA | 0 | 2 | Not-determined | Genome-fragment | NA    | 0     |
| S4_k141_71514                              | 1066  | No  | NA | 0 | 0 | Not-determined | Genome-fragment | NA    | 0     |
| S4_k141_36432                              | 1345  | No  | NA | 0 | 0 | Not-determined | Genome-fragment | NA    | 0     |
| S4_k141_29922                              | 1301  | No  | NA | 0 | 1 | Not-determined | Genome-fragment | NA    | 0     |
| S4_k141_113340                             | 2660  | No  | NA | 0 | 1 | Not-determined | Genome-fragment | NA    | 0     |
| S4_k141_43606                              | 1086  | No  | NA | 0 | 0 | Not-determined | Genome-fragment | NA    | 0     |
| S4_k141_99357                              | 3488  | No  | NA | 0 | 1 | Not-determined | Genome-fragment | NA    | 0     |
| S4_k141_78719                              | 3951  | No  | NA | 0 | 4 | Not-determined | Genome-fragment | NA    | 0     |
| S4_k141_127467                             | 12669 | No  | NA | 0 | 0 | Not-determined | Genome-fragment | NA    | 0     |
| S4_k141_155108                             | 12166 | No  | NA | 0 | 2 | Not-determined | Genome-fragment | NA    | 0     |
| S4_k141_92580                              | 1787  | No  | NA | 0 | 2 | Not-determined | Genome-fragment | NA    | 0     |
| S4_k141_148063                             | 5527  | No  | NA | 0 | 0 | Not-determined | Genome-fragment | NA    | 0     |
| S4_k141_8729                               | 2476  | No  | NA | 0 | 0 | Not-determined | Genome-fragment | NA    | 0     |
| S4_k141_113346                             | 2459  | No  | NA | 0 | 0 | Not-determined | Genome-fragment | NA    | 0     |
| S4_k141_78729                              | 3943  | No  | NA | 0 | 1 | Not-determined | Genome-fragment | NA    | 0     |
| S4_k141_22507                              | 5723  | No  | NA | 0 | 1 | Not-determined | Genome-fragment | NA    | 0     |
| S4_k141_43646                              | 2024  | No  | NA | 0 | 1 | Not-determined | Genome-fragment | NA    | 0     |
| S4_k141_22521                              | 1005  | No  | NA | 0 | 0 | Not-determined | Genome-fragment | NA    | 0     |
| S4_k141_93602                              | 2458  | No  | NA | 0 | 3 | Not-determined | Genome-fragment | NA    | 0     |
| S4_k141_99394                              | 2177  | No  | NA | 0 | 1 | Not-determined | Genome-fragment | NA    | 0     |
| S4_k141_15636                              | 1156  | No  | NA | 0 | 1 | Not-determined | Genome-fragment | NA    | 0     |
| S9-final-viral-combined_k141_58912  full   | 5849  | No  | NA | 5 | 0 | Low-quality    | Genome-fragment | 8.09  | 0     |
| S4_k141_78707                              | 1671  | No  | NA | 0 | 0 | Not-determined | Genome-fragment | NA    | 0     |
| S4_k141_8766                               | 9884  | No  | NA | 0 | 3 | Not-determined | Genome-fragment | NA    | 0     |
| S4_k141_148127                             | 1750  | No  | NA | 0 | 2 | Not-determined | Genome-fragment | NA    | 0     |
| S4_k141_8776                               | 2148  | No  | NA | 0 | 0 | Not-determined | Genome-fragment | NA    | 0     |
| S4_k141_161990                             | 1909  | No  | NA | 0 | 0 | Not-determined | Genome-fragment | NA    | 0     |
| S4_k141_127525                             | 1230  | No  | NA | 0 | 1 | Not-determined | Genome-fragment | NA    | 0     |
| S4_k141_155168                             | 1112  | No  | NA | 0 | 0 | Not-determined | Genome-fragment | NA    | 0     |
| S8-final-viral-combined_k141_122179  full  | 5851  | No  | NA | 0 | 5 | Low-quality    | Genome-fragment | 5.2   | 0     |
| S12-final-viral-combined_k141_73592  full  | 5852  | No  | NA | 4 | 0 | Low-quality    | Genome-fragment | 18.17 | 0     |
| S12-final-viral-combined_k141_203344  full | 5853  | Yes | NA | 1 | 1 | Low-quality    | Genome-fragment | 8.33  | 46.16 |
| S4-final-viral-combined_k141_150686  full  | 5854  | No  | NA | 0 | 2 | Low-quality    | Genome-fragment | 2.37  | 0     |
| S1-final-viral-combined_k141_59940  full   | 5856  | No  | NA | 0 | 3 | Low-quality    | Genome-fragment | 0.68  | 0     |
| S4_k141_141348                             | 1555  | No  | NA | 0 | 1 | Not-determined | Genome-fragment | NA    | 0     |
| S4_k141_141354                             | 1077  | No  | NA | 0 | 0 | Not-determined | Genome-fragment | NA    | 0     |
| S4_k141_30053                              | 3910  | No  | NA | 0 | 2 | Not-determined | Genome-fragment | NA    | 0     |
| S4_k141_127578                             | 2680  | No  | NA | 0 | 1 | Not-determined | Genome-fragment | NA    | 0     |
| S4_k141_134318                             | 1041  | No  | NA | 0 | 2 | Not-determined | Genome-fragment | NA    | 0     |
| S4_k141_43785                              | 1424  | No  | NA | 0 | 2 | Not-determined | Genome-fragment | NA    | 0     |
| S4_k141_127612                             | 1426  | No  | NA | 0 | 0 |                |                 |       |       |



|                                            |       |     |       |    |    |                |                 |       |       |
|--------------------------------------------|-------|-----|-------|----|----|----------------|-----------------|-------|-------|
| S11_k141_112259                            | 5868  | No  | NA    | 3  | 0  | Low-quality    | Genome-fragment | 12.48 | 0     |
| S4_k141_162239                             | 8305  | No  | NA    | 0  | 5  | Not-determined | Genome-fragment | NA    | 0     |
| S4_k141_22801                              | 3044  | No  | NA    | 0  | 1  | Not-determined | Genome-fragment | NA    | 0     |
| S4_k141_148330                             | 1158  | No  | NA    | 0  | 1  | Not-determined | Genome-fragment | NA    | 0     |
| S4_k141_134491                             | 1903  | No  | NA    | 0  | 1  | Not-determined | Genome-fragment | NA    | 0     |
| S4_k141_79042                              | 5287  | No  | NA    | 0  | 4  | Not-determined | Genome-fragment | NA    | 0     |
| S4_k141_8984                               | 1583  | No  | NA    | 0  | 2  | Not-determined | Genome-fragment | NA    | 0     |
| S8_k141_14145                              | 5869  | No  | NA    | 2  | 0  | Low-quality    | Genome-fragment | 9.51  | 0     |
| S4_k141_162178                             | 2079  | No  | NA    | 0  | 1  | Not-determined | Genome-fragment | NA    | 0     |
| S4_k141_9012                               | 1111  | No  | NA    | 0  | 0  | Not-determined | Genome-fragment | NA    | 0     |
| S4_k141_148364                             | 1391  | No  | NA    | 0  | 1  | Not-determined | Genome-fragment | NA    | 0     |
| S4_k141_57795                              | 1152  | No  | NA    | 0  | 1  | Not-determined | Genome-fragment | NA    | 0     |
| S4_k141_71784                              | 3990  | No  | NA    | 0  | 1  | Not-determined | Genome-fragment | NA    | 0     |
| S4_k141_15961                              | 1479  | No  | NA    | 0  | 1  | Not-determined | Genome-fragment | NA    | 0     |
| S17-final-viral-combined_k141_170607  full | 5870  | No  | NA    | 0  | 0  | Low-quality    | Genome-fragment | 13.82 | 0     |
| S4_k141_36777                              | 6306  | No  | NA    | 0  | 1  | Not-determined | Genome-fragment | NA    | 0     |
| S4_k141_113516                             | 2321  | No  | NA    | 0  | 0  | Not-determined | Genome-fragment | NA    | 0     |
| S4_k141_79109                              | 2889  | No  | NA    | 0  | 2  | Not-determined | Genome-fragment | NA    | 0     |
| S4_k141_127752                             | 1720  | No  | NA    | 0  | 1  | Not-determined | Genome-fragment | NA    | 0     |
| S4_k141_57836                              | 1275  | No  | NA    | 0  | 0  | Not-determined | Genome-fragment | NA    | 0     |
| S4_k141_15999                              | 3257  | No  | NA    | 0  | 1  | Not-determined | Genome-fragment | NA    | 0     |
| S4_k141_127761                             | 1212  | No  | NA    | 0  | 1  | Not-determined | Genome-fragment | NA    | 0     |
| S4_k141_141536                             | 1816  | No  | NA    | 0  | 1  | Not-determined | Genome-fragment | NA    | 0     |
| S12-final-viral-combined_k141_139430  full | 5870  | No  | NA    | 1  | 0  | Low-quality    | Genome-fragment | 9.5   | 0     |
| S2-final-viral-combined_k141_25989  full   | 5870  | No  | NA    | 2  | 0  | Low-quality    | Genome-fragment | 14.63 | 0     |
| S4_k141_50475                              | 8958  | Yes | 68255 | 17 | 20 | Complete       | High-quality    | 100   | 31.47 |
| S4_k141_134588                             | 1250  | No  | NA    | 0  | 1  | Not-determined | Genome-fragment | NA    | 0     |
| S4_k141_50476                              | 2219  | No  | NA    | 0  | 0  | Not-determined | Genome-fragment | NA    | 0     |
| S4_k141_9087                               | 2220  | No  | NA    | 0  | 1  | Not-determined | Genome-fragment | NA    | 0     |
| S12_k141_48000                             | 5871  | No  | NA    | 2  | 0  | Low-quality    | Genome-fragment | 12.82 | 0     |
| S7_k141_191636                             | 5872  | No  | NA    | 0  | 2  | Low-quality    | Genome-fragment | 6.12  | 0     |
| S1-final-viral-combined_k141_392539  full  | 5873  | No  | NA    | 1  | 0  | Low-quality    | Genome-fragment | 9.67  | 0     |
| S4_k141_127802                             | 1452  | No  | NA    | 0  | 1  | Not-determined | Genome-fragment | NA    | 0     |
| S4_k141_16050                              | 2801  | No  | NA    | 0  | 0  | Not-determined | Genome-fragment | NA    | 0     |
| S4_k141_71862                              | 2006  | No  | NA    | 0  | 1  | Not-determined | Genome-fragment | NA    | 0     |
| S4_k141_30180                              | 1000  | No  | NA    | 0  | 1  | Not-determined | Genome-fragment | NA    | 0     |
| S4_k141_9123                               | 1001  | No  | NA    | 0  | 1  | Not-determined | Genome-fragment | NA    | 0     |
| S4_k141_93035                              | 1304  | No  | NA    | 0  | 1  | Not-determined | Genome-fragment | NA    | 0     |
| S4_k141_64902                              | 2099  | No  | NA    | 0  | 1  | Not-determined | Genome-fragment | NA    | 0     |
| S5-final-viral-combined_k141_64169  full   | 5873  | No  | NA    | 3  | 0  | Low-quality    | Genome-fragment | 13.42 | 0     |
| S4_k141_134646                             | 1355  | No  | NA    | 0  | 1  | Not-determined | Genome-fragment | NA    | 0     |
| S4_k141_23004                              | 1524  | No  | NA    | 0  | 2  | Not-determined | Genome-fragment | NA    | 0     |
| S4_k141_50523                              | 1714  | No  | NA    | 0  | 2  | Not-determined | Genome-fragment | NA    | 0     |
| S4_k141_93077                              | 1177  | No  | NA    | 0  | 1  | Not-determined | Genome-fragment | NA    | 0     |
| S4_k141_120167                             | 3628  | No  | NA    | 0  | 1  | Not-determined | Genome-fragment | NA    | 0     |
| S4_k141_50537                              | 3162  | No  | NA    | 0  | 2  | Not-determined | Genome-fragment | NA    | 0     |
| S4_k141_85930                              | 20880 | No  | NA    | 0  | 8  | Not-determined | Genome-fragment | NA    | 0     |
| S4_k141_141607                             | 5335  | No  | NA    | 14 | 3  | Medium-quality | Genome-fragment | 86.12 | 0     |
| S4_k141_44058                              | 1096  | No  | NA    | 0  | 0  | Not-determined | Genome-fragment | NA    | 0     |
| S4_k141_71913                              | 1505  | No  | NA    | 0  | 0  | Not-determined | Genome-fragment | NA    | 0     |
| S2-final-viral-combined_k141_18895  full   | 5873  | No  | NA    | 0  | 1  | Low-quality    | Genome-fragment | 6.93  | 0     |
| S4_k141_106881                             | 1746  | No  | NA    | 0  | 1  | Not-determined | Genome-fragment | NA    | 0     |
| S4_k141_93102                              | 1320  | No  | NA    | 0  | 0  | Not-determined | Genome-fragment | NA    | 0     |
| S2_k141_126003                             | 5873  | No  | NA    | 2  | 0  | Low-quality    | Genome-fragment | 10.62 | 0     |
| S3-final-viral-combined_k141_65152  full   | 5875  | No  | NA    | 0  | 3  | Low-quality    | Genome-fragment | 6.2   | 0     |
| S5-final-viral-combined_k141_140416  full  | 5875  | No  | NA    | 0  | 2  | Low-quality    | Genome-fragment | 13.74 | 0     |
| S4_k141_36880                              | 1196  | No  | NA    | 0  | 1  | Not-determined | Genome-fragment | NA    | 0     |
| S4_k141_148538                             | 1128  | No  | NA    | 0  | 1  | Not-determined | Genome-fragment | NA    | 0     |
| S4_k141_36898                              | 3117  | No  | NA    | 0  | 2  | Not-determined | Genome-fragment | NA    | 0     |
| S3-final-viral-combined_k141_125893  full  | 5878  | No  | NA    | 0  | 2  | Low-quality    | Genome-fragment | 1.83  | 0     |
| S4_k141_71951                              | 1466  | No  | NA    | 0  | 0  | Not-determined | Genome-fragment | NA    | 0     |
| S4_k141_36905                              | 4853  | No  | NA    | 0  | 0  | Not-determined | Genome-fragment | NA    | 0     |
| S4_k141_30245                              | 1670  | No  | NA    | 0  | 0  | Not-determined | Genome-fragment | NA    | 0     |
| S4_k141_155548                             | 1072  | No  | NA    | 0  | 0  | Not-determined | Genome-fragment | NA    | 0     |
| S4_k141_16119                              | 1079  | No  | NA    | 0  | 1  | Not-determined | Genome-fragment | NA    | 0     |
| S4_k141_71979                              | 1908  | No  | NA    | 0  | 1  | Not-determined | Genome-fragment | NA    | 0     |
| S4_k141_155557                             | 1036  | No  | NA    | 0  | 1  | Not-determined | Genome-fragment | NA    | 0     |
| S4_k141_65001                              | 1487  | No  | NA    | 0  | 1  | Not-determined | Genome-fragment | NA    | 0     |
| S4_k141_2319                               | 1252  | No  | NA    | 0  | 0  | Not-determined | Genome-fragment | NA    | 0     |
| S4_k141_23103                              | 1072  | No  | NA    | 0  | 0  | Not-determined | Genome-fragment | NA    | 0     |
| S4_k141_86032                              | 1270  | No  | NA    | 0  | 1  | Not-determined | Genome-fragment | NA    | 0     |
| S4_k141_141683                             | 4561  | No  | NA    | 0  | 2  | Not-determined | Genome-fragment | NA    | 0     |
| S4_k141_2343                               | 1363  | No  | NA    | 0  | 2  | Not-determined | Genome-fragment | NA    | 0     |
| S12-final-viral-combined_k141_395235  full | 5878  | No  | NA    | 2  | 0  | Low-quality    | Genome-fragment | 15.57 | 0     |
| S4_k141_127862                             | 3261  | No  | NA    | 0  | 3  | Not-determined | Genome-fragment | NA    | 0     |
| S4_k141_36976                              | 3212  | No  | NA    | 0  | 1  | Not-determined | Genome-fragment | NA    | 0     |
| S4_k141_30202                              | 5878  | No  | NA    | 1  | 0  | Low-quality    | Genome-fragment | 12.81 | 0     |
| S4_k141_50588                              | 50250 | No  | NA    | 0  | 52 | Not-determined | Genome-fragment | NA    | 0     |
| S4_k141_127872                             | 6351  | No  | NA    | 0  | 0  | Not-determined | Genome-fragment | NA    | 0     |
| S4_k141_113738                             | 3716  | No  | NA    | 0  | 1  | Not-determined | Genome-fragment | NA    | 0     |
| S4_k141_86059                              | 1384  | No  | NA    | 0  | 0  | Not-determined | Genome-fragment | NA    | 0     |
| S4_k141_141716                             | 4615  | No  | NA    | 0  | 1  | Not-determined | Genome-fragment | NA    | 0     |
| S4_k141_134766                             | 1263  | No  | NA    | 0  | 1  | Not-determined | Genome-fragment | NA    | 0     |
| S4_k141_16185                              | 1565  | No  | NA    | 0  | 0  | Not-determined | Genome-fragment | NA    | 0     |
| S4_k141_16189                              | 3524  | No  | NA    | 0  | 3  | Not-determined | Genome-fragment | NA    | 0     |
| S4_k141_106994                             | 1254  | No  | NA    | 0  | 0  | Not-determined | Genome-fragment | NA    | 0     |
| S4_k141_79366                              | 3593  | No  | NA    | 0  | 1  | Not-determined | Genome-fragment | NA    | 0     |
| S6-final-viral-combined_k141_9175  full    | 5878  | No  | NA    | 0  | 2  | Low-quality    | Genome-fragment | 2.41  | 0     |
| S4_k141_79380                              | 1157  | No  | NA    | 0  | 1  | Not-determined | Genome-fragment | NA    | 0     |
| S4_k141_86097                              | 1030  | No  | NA    | 0  | 1  | Not-determined | Genome-fragment | NA    | 0     |
| S4_k141_30336                              | 5362  | No  | NA    | 0  | 1  | Not-determined | Genome-fragment | NA    | 0     |
| S4_k141_72093                              | 1171  | No  | NA    | 0  | 2  | Not-determined | Genome-fragment | NA    | 0     |
| S8-final-viral-combined_k141_224814  full  | 5879  | No  | NA    | 0  | 1  | Low-quality    | Genome-fragment | 4.59  | 0     |
| S4_k141_162464                             | 3645  | No  | NA    | 0  | 4  | Not-determined | Genome-fragment | NA    | 0     |
| S6_k141_10489                              | 5880  | No  | NA    | 0  | 1  | Low-quality    | Genome-fragment | 18.23 | 0     |
| S4_k141_23136                              | 1791  | No  | NA    | 0  | 0  | Not-determined | Genome-fragment | NA    | 0     |
| S12-final-viral-combined_k141_358314  full | 5885  | No  | NA    | 0  | 2  | Low-quality    | Genome-fragment | 4.98  | 0     |
| S4_k141_141769                             | 1068  | No  | NA    | 0  | 0  | Not-determined | Genome-fragment | NA    | 0     |
| S9-final-viral-combined_k141_18268  full   | 5886  | No  | NA    | 1  | 0  | Low-quality    | Genome-fragment | 4.33  | 0     |
| S4_k141_44205                              | 1167  | No  | NA    | 0  | 1  | Not-determined | Genome-fragment | NA    | 0     |
| S4_k141_127926                             | 1303  | No  | NA    | 0  | 0  | Not-determined | Genome-fragment | NA    | 0     |
| S4_k141_30371                              | 1613  | No  | NA    | 0  | 0  | Not-determined | Genome-fragment | NA    | 0     |
| S2-final-viral-combined_k141_199126  full  | 5889  | No  | NA    | 0  | 0  | Low-quality    | Genome-fragment | 7.58  | 0     |
| S4_k141_99579                              | 1348  | No  | NA    | 0  | 0  | Not-determined | Genome-fragment | NA    | 0     |
| S6_k141_9987                               | 5889  | No  | NA    | 0  | 0  | Low-quality    | Genome-fragment | 5.84  | 0     |
| S4_k141_9421                               | 1498  | No  | NA    | 0  | 1  | Not-determined | Genome-fragment | NA    | 0     |
| S9-final-viral-combined_k141_66831  full   | 5892  | No  | NA    | 0  | 1  | Low-quality    | Genome-fragment | 8.43  | 0     |
| S4_k141_2433                               | 1512  | No  | NA    | 0  | 1  | Not-determined | Genome-fragment | NA    | 0     |
| S4_k141_134838                             | 3344  | No  | NA    | 0  | 0  | Not-determined | Genome-fragment | NA    | 0     |
| S7-final-viral-combined_k141_134450  full  | 5892  | No  | NA    | 4  | 0  | Low-quality    | Genome-fragment | 10.54 | 0     |
| S4_k141_155627                             | 4081  | No  | NA    | 0  | 0  | Not-determined | Genome-fragment | NA    | 0     |
| S4_k141_113340                             | 1661  | No  | NA    | 0  | 0  | Not-determined | Genome-fragment | NA    | 0     |
| S4_k141_120397                             | 1162  | No  | NA    | 0  | 1  | Not-determined | Genome-fragment | NA    | 0     |
| S4_k141_72183                              | 2818  | No  | NA    | 0  | 2  | Not-determined | Genome-fragment | NA    | 0     |
| S4_k141_442164                             | 1699  | No  | NA    | 0  | 0  | Not-determined | Genome-fragment | NA    | 0     |
| S17-k141_148946                            | 5892  | No  | NA    | 1  | 0  | Low-quality    | Genome-fragment | 7.2   | 0     |
| S4_k141_134856                             | 1772  | No  | NA    | 0  | 1  | Not-determined | Genome-fragment | NA    | 0     |
| S11-final-viral-combined_k141_51812  full  | 5896  | No  | NA    | 5  | 0  | Low-quality    | Genome-fragment | 12.81 | 0     |
| S4_k141_86178                              | 1111  | No  | NA    | 0  | 0  | Not-determined | Genome-fragment | NA    | 0     |
| S4_k141_57966                              | 8172  | No  | NA    | 0  | 1  | Not-determined | Genome-fragment | NA    | 0     |
| S4_k141_57968                              | 1256  | No  | NA    | 0  | 1  | Not-determined | Genome-fragment | NA    | 0     |
| S4_k141_107107                             | 1389  | No  | NA    | 0  | 1  | Not-determined | Genome-fragment | NA    | 0     |
| S4_k141_9469                               | 1261  | No  | NA    | 0  | 1  | Not-determined | Genome-fragment | NA    | 0     |
| S4_k141_57977                              | 1009  | No  | NA    | 0  | 1  | Not-determined | Genome-fragment | NA    | 0     |
| S11-final-viral-combined_k141_78599  full  | 5899  | No  | NA    | 1  | 0  | Low-quality    | Genome-fragment | 10.12 | 0     |
| S4_k141_79510                              | 1091  | No  | NA    | 0  | 1  | Not-determined | Genome-fragment | NA    | 0     |
| S4_k141_99656                              | 1449  | No  | NA    | 0  | 1  | Not-determined | Genome-fragment | NA    | 0     |
| S4_k141_86206                              | 1462  | No  | NA    | 0  | 1  | Not-determined | Genome-fragment | NA    | 0     |
| S4_k141_79532                              | 1672  | No  | NA    | 0  | 1  | Not-determined | Genome-fragment | NA    | 0     |
| S6_k141_110387                             | 5900  | No  | NA    | 0  | 4  | Low-quality    | Genome-fragment | 3.49  | 0     |
| S8-final-viral-combined_k141_70389  full   | 5900  | No  | NA    | 4  | 0  | Low-quality    | Genome-fragment | 13.82 | 0     |
| S4_k141_141904                             | 2418  | No  | NA    | 0  | 2  | Not-determined | Genome-fragment | NA    | 0     |
| S4_k141_107136                             | 6056  | No  | NA    | 0  | 0  | Not-determined | Genome-fragment | NA    | 0     |
| S4_k141_162576                             | 1150  | No  | NA    | 0  | 1  | Not-determined | Genome-fragment | NA    | 0     |
| S4_k141_65253                              | 1116  | No  | NA    | 0  | 0  | Not-determined | Genome-fragment | NA    | 0     |
| S4_k141_2553                               | 7210  | No  | NA    | 0  | 4  | Not-determined | Genome-fragment | NA    | 0     |
| S4_k141_107143                             | 2904  | No  | NA    | 0  | 3  | Not-determined | Genome-fragment | NA    | 0     |
| S4_k141_210455                             | 1360  | No  | NA    | 0  | 2  | Not-determined | Genome-fragment | NA    | 0     |
| S3-final-viral-combined_k141_59652  full   | 5901  | Yes | 1915  | 1  | 1  | Low-quality    | Genome-fragment | 1.35  | 67.55 |
| S2-final-viral-combined_k141_64503  full   | 5901  | Yes | 1041  | 1  | 3  | Low-quality    | Genome-fragment | 1.48  | 82.36 |
| S4_k141_58038                              | 1483  | No  | NA    | 0  | 1  | Not-determined | Genome-fragment | NA    | 0     |
| S4_k141_9508                               | 1459  | No  | NA    | 0  | 0  | Not-determined | Genome-fragment | NA    | 0     |
| S4_k141_162609                             | 1038  | No  | NA    | 0  | 0  | Not-determined | Genome-fragment | NA    | 0     |
| S2_k141_123962                             | 5901  | No  | NA    | 0  | 5  | Low-quality    | Genome-fragment | 19.84 | 0     |
| S4_k141_155752                             | 1041  | No  | NA    | 0  | 1  | Not-determined | Genome-fragment | NA    | 0     |
| S4_k141_99692                              | 1859  | No  | NA    | 0  | 1  | Not-determined | Genome-fragment | NA    | 0     |
| S4_k141_23289                              | 1098  | No  | NA    | 0  |    |                |                 |       |       |



|                                             |       |     |      |   |   |                   |                 |       |       |
|---------------------------------------------|-------|-----|------|---|---|-------------------|-----------------|-------|-------|
| S4_k141_120554                              | 5447  | No  | NA   | 0 | 5 | Not-determined    | Genome-fragment | NA    | 0     |
| S4_k141_120567                              | 1117  | No  | NA   | 0 | 0 | Not-determined    | Genome-fragment | NA    | 0     |
| S4_k141_135031                              | 1249  | No  | NA   | 0 | 0 | 1 Not-determined  | Genome-fragment | NA    | 0     |
| S9-final-viral-combined_k141_134711[full]   | 5913  | No  | NA   | 0 | 0 | Low-quality       | Genome-fragment | 9.09  | 0     |
| S4_k141_130637                              | 1971  | No  | NA   | 0 | 0 | 1 Not-determined  | Genome-fragment | NA    | 0     |
| S4_k141_93162                               | 1007  | No  | NA   | 0 | 0 | Not-determined    | Genome-fragment | NA    | 0     |
| S4_k141_142060                              | 1065  | No  | NA   | 0 | 0 | 1 Not-determined  | Genome-fragment | NA    | 0     |
| S4_k141_148483                              | 1924  | No  | NA   | 0 | 0 | 2 Not-determined  | Genome-fragment | NA    | 0     |
| S4_k141_144449                              | 1256  | No  | NA   | 0 | 0 | 1 Not-determined  | Genome-fragment | NA    | 0     |
| S4_k141_93382                               | 1011  | No  | NA   | 0 | 0 | 0 Not-determined  | Genome-fragment | NA    | 0     |
| S1-final-viral-combined_k141_1032241[full]  | 5914  | No  | NA   | 0 | 0 | 1 Low-quality     | Genome-fragment | 9.43  | 0     |
| S4_k141_148054                              | 3126  | No  | NA   | 0 | 0 | 3 Not-determined  | Genome-fragment | NA    | 0     |
| S4_k141_99794                               | 1123  | No  | NA   | 0 | 0 | 1 Not-determined  | Genome-fragment | NA    | 0     |
| S4_k141_130677                              | 1184  | No  | NA   | 0 | 0 | 1 Not-determined  | Genome-fragment | NA    | 0     |
| S4_k141_135076                              | 1573  | No  | NA   | 0 | 0 | 2 Not-determined  | Genome-fragment | NA    | 0     |
| S4_k141_2734                                | 7424  | No  | NA   | 0 | 0 | 4 Not-determined  | Genome-fragment | NA    | 0     |
| S1-final-viral-combined_k141_3724981[full]  | 5914  | Yes | 5076 | 1 | 0 | 1 Low-quality     | Genome-fragment | 1.64  | 14.17 |
| S4_k141_50877                               | 3499  | No  | NA   | 0 | 0 | 0 Not-determined  | Genome-fragment | NA    | 0     |
| S6_k141_115701                              | 5919  | No  | NA   | 0 | 0 | 0 Low-quality     | Genome-fragment | 7.03  | 0     |
| S4_k141_37230                               | 3087  | No  | NA   | 0 | 0 | 2 Not-determined  | Genome-fragment | NA    | 0     |
| S4_k141_2771                                | 1215  | No  | NA   | 0 | 0 | 1 Not-determined  | Genome-fragment | NA    | 0     |
| S4_k141_114001                              | 4141  | No  | NA   | 0 | 0 | 2 Not-determined  | Genome-fragment | NA    | 0     |
| S12-final-viral-combined_k141_1067221[full] | 5920  | No  | NA   | 1 | 0 | 0 Low-quality     | Genome-fragment | 4.09  | 0     |
| S4_k141_142115                              | 5016  | No  | NA   | 0 | 0 | 4 Not-determined  | Genome-fragment | NA    | 0     |
| S4_k141_30724                               | 3890  | No  | NA   | 0 | 0 | 5 Not-determined  | Genome-fragment | NA    | 0     |
| S4_k141_72489                               | 1065  | No  | NA   | 0 | 0 | 0 Not-determined  | Genome-fragment | NA    | 0     |
| S4_k141_99872                               | 3035  | No  | NA   | 0 | 0 | 1 Not-determined  | Genome-fragment | NA    | 0     |
| S4_k141_107263                              | 1035  | No  | NA   | 0 | 0 | 1 Not-determined  | Genome-fragment | NA    | 0     |
| S4_k141_148931                              | 1208  | No  | NA   | 0 | 0 | 0 Not-determined  | Genome-fragment | NA    | 0     |
| S7_k141_126865                              | 5923  | No  | NA   | 1 | 0 | 0 Low-quality     | Genome-fragment | 9.82  | 0     |
| S4_k141_142142                              | 2096  | No  | NA   | 0 | 0 | 3 Not-determined  | Genome-fragment | NA    | 0     |
| S4_k141_16484                               | 1012  | No  | NA   | 0 | 0 | 1 Not-determined  | Genome-fragment | NA    | 0     |
| S4_k141_148952                              | 2868  | No  | NA   | 0 | 0 | 1 Not-determined  | Genome-fragment | NA    | 0     |
| S2_k141_53968                               | 5923  | No  | NA   | 2 | 0 | 0 Low-quality     | Genome-fragment | 8.73  | 0     |
| S4_k141_148962                              | 1091  | No  | NA   | 0 | 0 | 1 Not-determined  | Genome-fragment | NA    | 0     |
| S4_k141_72532                               | 2100  | No  | NA   | 0 | 0 | 0 Not-determined  | Genome-fragment | NA    | 0     |
| S4_k141_2823                                | 1161  | No  | NA   | 0 | 0 | 1 Not-determined  | Genome-fragment | NA    | 0     |
| S4_k141_16500                               | 1187  | No  | NA   | 0 | 0 | 1 Not-determined  | Genome-fragment | NA    | 0     |
| S4_k141_148966                              | 1548  | No  | NA   | 0 | 0 | 2 Not-determined  | Genome-fragment | NA    | 0     |
| S1-final-viral-combined_k141_964161[full]   | 5933  | No  | NA   | 0 | 0 | 4 Low-quality     | Genome-fragment | 12.74 | 0     |
| S4_k141_40840                               | 5941  | No  | NA   | 4 | 0 | 0 Low-quality     | Genome-fragment | 12.62 | 0     |
| S4_k141_2816                                | 2852  | No  | NA   | 0 | 0 | 1 Not-determined  | Genome-fragment | NA    | 0     |
| S4-final-viral-combined_k141_293061[full]   | 5943  | No  | NA   | 0 | 0 | 2 Low-quality     | Genome-fragment | 8.55  | 0     |
| S4_k141_79679                               | 1592  | No  | NA   | 0 | 0 | 1 Not-determined  | Genome-fragment | NA    | 0     |
| S2-final-viral-combined_k141_1346821[full]  | 5944  | Yes | 857  | 1 | 0 | 5 Low-quality     | Genome-fragment | 1.87  | 85.58 |
| S4_k141_156038                              | 1314  | No  | NA   | 0 | 0 | 1 Not-determined  | Genome-fragment | NA    | 0     |
| S4_k141_142191                              | 2529  | No  | NA   | 0 | 0 | 2 Not-determined  | Genome-fragment | NA    | 0     |
| S4_k141_9652                                | 3971  | No  | NA   | 0 | 0 | 2 Not-determined  | Genome-fragment | NA    | 0     |
| S4_k141_114067                              | 1608  | No  | NA   | 0 | 0 | 2 Not-determined  | Genome-fragment | NA    | 0     |
| S4_k141_135128                              | 1637  | No  | NA   | 0 | 0 | 3 Not-determined  | Genome-fragment | NA    | 0     |
| S1-final-viral-combined_k141_1752991[full]  | 5947  | No  | NA   | 0 | 0 | 4 Low-quality     | Genome-fragment | 1.86  | 0     |
| S1_k141_245583                              | 5950  | No  | NA   | 1 | 0 | 0 Low-quality     | Genome-fragment | 12.95 | 0     |
| S8-final-viral-combined_k141_1366941[full]  | 5951  | No  | NA   | 5 | 0 | 0 Low-quality     | Genome-fragment | NA    | 0     |
| S4_k141_9669                                | 1285  | No  | NA   | 0 | 0 | 0 Not-determined  | Genome-fragment | NA    | 0     |
| S6_k141_172729                              | 5954  | No  | NA   | 4 | 0 | 0 Low-quality     | Genome-fragment | 12.97 | 0     |
| S4_k141_65492                               | 1280  | No  | NA   | 0 | 0 | 0 Not-determined  | Genome-fragment | NA    | 0     |
| S4_k141_79754                               | 1252  | No  | NA   | 0 | 0 | 1 Not-determined  | Genome-fragment | NA    | 0     |
| S4_k141_37373                               | 1100  | No  | NA   | 0 | 0 | 2 Not-determined  | Genome-fragment | NA    | 0     |
| S4_k141_107383                              | 1613  | No  | NA   | 0 | 0 | 0 Not-determined  | Genome-fragment | NA    | 0     |
| S4_k141_9714                                | 1698  | No  | NA   | 0 | 0 | 1 Not-determined  | Genome-fragment | NA    | 0     |
| S4_k141_44623                               | 2715  | No  | NA   | 0 | 0 | 0 Not-determined  | Genome-fragment | NA    | 0     |
| S4_k141_128045                              | 1356  | No  | NA   | 0 | 0 | 0 Not-determined  | Genome-fragment | NA    | 0     |
| S4_k141_37392                               | 1536  | No  | NA   | 0 | 0 | 1 Not-determined  | Genome-fragment | NA    | 0     |
| S4_k141_72618                               | 1114  | No  | NA   | 0 | 0 | 0 Not-determined  | Genome-fragment | NA    | 0     |
| S4_k141_156136                              | 1190  | No  | NA   | 0 | 0 | 0 Not-determined  | Genome-fragment | NA    | 0     |
| S4_k141_23636                               | 2256  | No  | NA   | 0 | 0 | 1 Not-determined  | Genome-fragment | NA    | 0     |
| S4_k141_44645                               | 1262  | No  | NA   | 0 | 0 | 1 Not-determined  | Genome-fragment | NA    | 0     |
| S4_k141_128066                              | 1049  | No  | NA   | 0 | 0 | 1 Not-determined  | Genome-fragment | NA    | 0     |
| S11-final-viral-combined_k141_1740671[full] | 5955  | Yes | 2718 | 1 | 0 | 1 Low-quality     | Genome-fragment | 1.36  | 54.16 |
| S4_k141_37414                               | 1157  | No  | NA   | 0 | 0 | 0 Not-determined  | Genome-fragment | NA    | 0     |
| S11-final-viral-combined_k141_2038431[full] | 5956  | No  | NA   | 0 | 0 | 3 Low-quality     | Genome-fragment | 16.57 | 0     |
| S4_k141_23656                               | 1045  | No  | NA   | 0 | 0 | 1 Not-determined  | Genome-fragment | NA    | 0     |
| S4_k141_114120                              | 1414  | No  | NA   | 5 | 0 | 0 High-quality    | Genome-fragment | 99.64 | 0     |
| S4_k141_2985                                | 1290  | No  | NA   | 0 | 0 | 0 Not-determined  | Genome-fragment | NA    | 0     |
| S4_k141_135224                              | 1118  | No  | NA   | 0 | 0 | 1 Not-determined  | Genome-fragment | NA    | 0     |
| S4_k141_142329                              | 4436  | No  | NA   | 0 | 0 | 3 Not-determined  | Genome-fragment | NA    | 0     |
| S4_k141_72639                               | 1170  | No  | NA   | 0 | 0 | 0 Not-determined  | Genome-fragment | NA    | 0     |
| S4_k141_107454                              | 3844  | No  | NA   | 0 | 0 | 3 Not-determined  | Genome-fragment | NA    | 0     |
| S4_k141_162923                              | 14544 | No  | NA   | 0 | 0 | 0 Not-determined  | Genome-fragment | NA    | 0     |
| S4_k141_30986                               | 1392  | No  | NA   | 0 | 0 | 1 Not-determined  | Genome-fragment | NA    | 0     |
| S4_k141_23693                               | 2104  | No  | NA   | 0 | 0 | 1 Not-determined  | Genome-fragment | NA    | 0     |
| S4_k141_128133                              | 1211  | No  | NA   | 0 | 0 | 1 Not-determined  | Genome-fragment | NA    | 0     |
| S4_k141_51102                               | 1587  | No  | NA   | 0 | 0 | 1 Not-determined  | Genome-fragment | NA    | 0     |
| S2_k141_117905                              | 5956  | No  | NA   | 4 | 0 | 0 Low-quality     | Genome-fragment | 19.58 | 0     |
| S4_k141_65556                               | 45143 | No  | NA   | 0 | 0 | 2 Not-determined  | Genome-fragment | NA    | 0     |
| S4_k141_86617                               | 1761  | No  | NA   | 0 | 0 | 1 Not-determined  | Genome-fragment | NA    | 0     |
| S4_k141_57954                               | 5958  | No  | NA   | 0 | 0 | 0 Low-quality     | Genome-fragment | 13.27 | 0     |
| S8-final-viral-combined_k141_1196371[full]  | 5962  | No  | NA   | 4 | 0 | 0 Low-quality     | Genome-fragment | 8.85  | 0     |
| S4_k141_16656                               | 1361  | No  | NA   | 0 | 0 | 1 Not-determined  | Genome-fragment | NA    | 0     |
| S4_k141_128155                              | 1105  | No  | NA   | 0 | 0 | 1 Not-determined  | Genome-fragment | NA    | 0     |
| S4_k141_162946                              | 5471  | No  | NA   | 0 | 0 | 11 Not-determined | Genome-fragment | NA    | 0     |
| S4_k141_162950                              | 5183  | No  | NA   | 0 | 0 | 0 Not-determined  | Genome-fragment | NA    | 0     |
| S4_k141_156225                              | 3720  | No  | NA   | 0 | 0 | 1 Not-determined  | Genome-fragment | NA    | 0     |
| S4_k141_100115                              | 1507  | No  | NA   | 0 | 0 | 1 Not-determined  | Genome-fragment | NA    | 0     |
| S4_k141_34950                               | 5966  | No  | NA   | 0 | 0 | 4 Low-quality     | Genome-fragment | 3.1   | 0     |
| S9-final-viral-combined_k141_1092201[full]  | 5967  | No  | NA   | 2 | 0 | 1 Low-quality     | Genome-fragment | 4.7   | 0     |
| S4_k141_100135                              | 1424  | No  | NA   | 0 | 0 | 1 Not-determined  | Genome-fragment | NA    | 0     |
| S4_k141_114192                              | 1262  | No  | NA   | 0 | 0 | 1 Not-determined  | Genome-fragment | NA    | 0     |
| S9-final-viral-combined_k141_514071[full]   | 5969  | No  | NA   | 7 | 0 | 0 Low-quality     | Genome-fragment | 13.13 | 0     |
| S4_k141_86706                               | 1314  | No  | NA   | 0 | 0 | 0 Not-determined  | Genome-fragment | NA    | 0     |
| S4_k141_51180                               | 1357  | No  | NA   | 0 | 0 | 0 Not-determined  | Genome-fragment | NA    | 0     |
| S4_k141_51181                               | 1173  | No  | NA   | 0 | 0 | 1 Not-determined  | Genome-fragment | NA    | 0     |
| S4_k141_163007                              | 1303  | No  | NA   | 0 | 0 | 0 Not-determined  | Genome-fragment | NA    | 0     |
| S17-final-viral-combined_k141_187551[full]  | 5969  | No  | NA   | 1 | 0 | 0 Low-quality     | Genome-fragment | 8.6   | 0     |
| S1-final-viral-combined_k141_2416551[full]  | 5970  | No  | NA   | 5 | 0 | 0 Low-quality     | Genome-fragment | 9.78  | 0     |
| S1-final-viral-combined_k141_1991701[full]  | 5980  | No  | NA   | 1 | 0 | 0 Low-quality     | Genome-fragment | 3.85  | 0     |
| S4_k141_100167                              | 6079  | No  | NA   | 0 | 0 | 13 Not-determined | Genome-fragment | NA    | 0     |
| S4_k141_135293                              | 1196  | No  | NA   | 0 | 0 | 0 Not-determined  | Genome-fragment | NA    | 0     |
| S4_k141_114251                              | 1219  | No  | NA   | 0 | 0 | 0 Not-determined  | Genome-fragment | NA    | 0     |
| S4_k141_9927                                | 2613  | No  | NA   | 0 | 0 | 1 Not-determined  | Genome-fragment | NA    | 0     |
| S4_k141_163040                              | 5218  | No  | NA   | 0 | 0 | 0 Not-determined  | Genome-fragment | NA    | 0     |
| S4_k141_3079                                | 1053  | No  | NA   | 0 | 0 | 1 Not-determined  | Genome-fragment | NA    | 0     |
| S3-final-viral-combined_k141_126901[full]   | 5980  | No  | NA   | 0 | 0 | 0 Low-quality     | Genome-fragment | 2.75  | 0     |
| S4_k141_114266                              | 1507  | No  | NA   | 0 | 0 | 1 Not-determined  | Genome-fragment | NA    | 0     |
| S4_k141_58535                               | 3473  | No  | NA   | 0 | 0 | 1 Not-determined  | Genome-fragment | NA    | 0     |
| S4_k141_107587                              | 3442  | No  | NA   | 0 | 0 | 1 Not-determined  | Genome-fragment | NA    | 0     |
| S4_k141_149230                              | 1068  | No  | NA   | 0 | 0 | 0 Not-determined  | Genome-fragment | NA    | 0     |
| S4_k141_142555                              | 3670  | No  | NA   | 0 | 0 | 2 Not-determined  | Genome-fragment | NA    | 0     |
| S4_k141_72731                               | 1545  | No  | NA   | 0 | 0 | 1 Not-determined  | Genome-fragment | NA    | 0     |
| S11-final-viral-combined_k141_1345991[full] | 5982  | No  | NA   | 0 | 0 | 0 Low-quality     | Genome-fragment | 13.27 | 0     |
| S4_k141_128229                              | 1368  | No  | NA   | 0 | 0 | 3 Not-determined  | Genome-fragment | NA    | 0     |
| S7-final-viral-combined_k141_1534061[full]  | 5983  | No  | NA   | 4 | 0 | 0 Low-quality     | Genome-fragment | 11.1  | 0     |
| S4_k141_120990                              | 2004  | No  | NA   | 0 | 0 | 2 Not-determined  | Genome-fragment | NA    | 0     |
| S4_k141_31169                               | 6499  | No  | NA   | 0 | 0 | 6 Not-determined  | Genome-fragment | NA    | 0     |
| S4_k141_100251                              | 1518  | No  | NA   | 0 | 0 | 0 Not-determined  | Genome-fragment | NA    | 0     |
| S4_k141_107688                              | 1054  | No  | NA   | 0 | 0 | 1 Not-determined  | Genome-fragment | NA    | 0     |
| S4_k141_37596                               | 1054  | No  | NA   | 0 | 0 | 1 Not-determined  | Genome-fragment | NA    | 0     |
| S4_k141_135422                              | 1754  | No  | NA   | 0 | 0 | 1 Not-determined  | Genome-fragment | NA    | 0     |
| S4_k141_44909                               | 1641  | No  | NA   | 0 | 0 | 0 Not-determined  | Genome-fragment | NA    | 0     |
| S4_k141_10062                               | 1068  | No  | NA   | 0 | 0 | 1 Not-determined  | Genome-fragment | NA    | 0     |
| S11-final-viral-combined_k141_276301[full]  | 5984  | No  | NA   | 1 | 0 | 0 Low-quality     | Genome-fragment | 3.87  | 0     |
| S4_k141_23859                               | 1218  | No  | NA   | 0 | 0 | 1 Not-determined  | Genome-fragment | NA    | 0     |
| S4_k141_93772                               | 3645  | No  | NA   | 0 | 0 | 0 Not-determined  | Genome-fragment | NA    | 0     |
| S4_k141_107754                              | 1258  | No  | NA   | 0 | 0 | 1 Not-determined  | Genome-fragment | NA    | 0     |
| S4_k141_36856                               | 4411  | No  | NA   | 0 | 0 | 2 Not-determined  | Genome-fragment | NA    | 0     |
| S4_k141_149338                              | 2661  | No  | NA   | 0 | 0 | 0 Not-determined  | Genome-fragment | NA    | 0     |
| S4_k141_100312                              | 1913  | No  | NA   | 0 | 0 | 1 Not-determined  | Genome-fragment | NA    | 0     |
| S11_k141_182119                             | 5985  | No  | NA   | 0 | 0 | 6 Low-quality     | Genome-fragment | 2.42  | 0     |
| S4_k141_114363                              | 10802 | No  | NA   | 0 | 0 | 0 Not-determined  | Genome-fragment | NA    | 0     |
| S4_k141_3322                                | 8772  | No  | NA   | 0 | 0 | 3 Not-determined  | Genome-fragment | NA    | 0     |
| S4-final-viral-combined_k141_62421[full]    | 5986  | No  | NA   | 0 | 0 | 3 Low-quality     | Genome-fragment | 11.69 | 0     |
| S4_k141_149366                              | 1675  | No  | NA   | 0 | 0 | 1 Not-determined  | Genome-fragment | NA    | 0     |
| S8_k141_17650                               | 5986  | No  | NA   | 3 | 0 | 0 Low-quality     | Genome-fragment | 13.06 | 0     |
| S4_k141_107812                              | 5496  | No  | NA   | 0 | 0 | 3 Not-determined  | Genome-fragment | NA    | 0     |
| S2-final-viral-combined_k141_2200111[full]  | 598   |     |      |   |   |                   |                 |       |       |



|                                            |       |     |    |      |   |                |                 |                 |       |
|--------------------------------------------|-------|-----|----|------|---|----------------|-----------------|-----------------|-------|
| S4_k141_163332                             | 1090  | No  | NA | 0    | 2 | Not-determined | Genome-fragment | NA              | 0     |
| S4_k141_135610                             | 4313  | No  | NA | 0    | 4 | Not-determined | Genome-fragment | NA              | 0     |
| S4_k141_37839                              | 1438  | No  | NA | 0    | 0 | Not-determined | Genome-fragment | NA              | 0     |
| S4_k141_135618                             | 1056  | No  | NA | 0    | 2 | Not-determined | Genome-fragment | NA              | 0     |
| S4_k141_24087                              | 1420  | No  | NA | 0    | 0 | Not-determined | Genome-fragment | NA              | 0     |
| S4_k141_136069                             | 1392  | No  | NA | 0    | 1 | Not-determined | Genome-fragment | NA              | 0     |
| S4_k141_114526                             | 1225  | No  | NA | 0    | 1 | Not-determined | Genome-fragment | NA              | 0     |
| S4_k141_135630                             | 3924  | No  | NA | 0    | 2 | Not-determined | Genome-fragment | NA              | 0     |
| S12_k141_89929                             | 6008  | No  | NA | 1    | 0 | Low-quality    | Genome-fragment | NA              | 14.24 |
| S4_k141_107957                             | 1056  | No  | NA | 0    | 1 | Not-determined | Genome-fragment | NA              | 0     |
| S4_k141_121157                             | 1823  | No  | NA | 0    | 2 | Not-determined | Genome-fragment | NA              | 0     |
| S4_k141_45149                              | 1497  | No  | NA | 0    | 2 | Not-determined | Genome-fragment | NA              | 0     |
| S8-final-viral-combined_k141_81153  Full   | 6008  | No  | NA | 0    | 3 | Low-quality    | Genome-fragment | NA              | 5.47  |
| S4_k141_100565                             | 1042  | No  | NA | 0    | 0 | Not-determined | Genome-fragment | NA              | 0     |
| S4_k141_114566                             | 1520  | No  | NA | 0    | 0 | Not-determined | Genome-fragment | NA              | 0     |
| S4_k141_114570                             | 1083  | No  | NA | 0    | 1 | Not-determined | Genome-fragment | NA              | 0     |
| S4_k141_58778                              | 5703  | No  | NA | 0    | 2 | Not-determined | Genome-fragment | NA              | 0     |
| S4_k141_100572                             | 1229  | No  | NA | 0    | 2 | Not-determined | Genome-fragment | NA              | 0     |
| S4_k141_102020                             | 1598  | No  | NA | 0    | 0 | Not-determined | Genome-fragment | NA              | 0     |
| S4_k141_3349                               | 7304  | No  | NA | 0    | 4 | Not-determined | Genome-fragment | NA              | 0     |
| S4_k141_107994                             | 3710  | No  | NA | 0    | 3 | Not-determined | Genome-fragment | NA              | 0     |
| S4_k141_37869                              | 1428  | No  | NA | 0    | 0 | Not-determined | Genome-fragment | NA              | 0     |
| S4_k141_142876                             | 2099  | No  | NA | 0    | 1 | Not-determined | Genome-fragment | NA              | 0     |
| S12-final-viral-combined_k141_172668  Full | 6009  | No  | NA | 2    | 1 | Low-quality    | Genome-fragment | NA              | 4.48  |
| S4_k141_145590                             | 4873  | No  | NA | 0    | 0 | Not-determined | Genome-fragment | NA              | 0     |
| S4_k141_145450                             | 1406  | No  | NA | 0    | 1 | Not-determined | Genome-fragment | NA              | 0     |
| S17-final-viral-combined_k141_100733  Full | 6010  | No  | NA | 0    | 4 | Low-quality    | Genome-fragment | NA              | 5.33  |
| S4_k141_135665                             | 1031  | No  | NA | 0    | 1 | Not-determined | Genome-fragment | NA              | 0     |
| S4_k141_114547                             | 2375  | No  | NA | 0    | 2 | Not-determined | Genome-fragment | NA              | 0     |
| S4_k141_93961                              | 1923  | No  | NA | 0    | 0 | Not-determined | Genome-fragment | NA              | 0     |
| S4_k141_31496                              | 1512  | No  | NA | 0    | 1 | Not-determined | Genome-fragment | NA              | 0     |
| S4_k141_163416                             | 3528  | No  | NA | 0    | 1 | Not-determined | Genome-fragment | NA              | 0     |
| S4_k141_87052                              | 1098  | No  | NA | 0    | 2 | Not-determined | Genome-fragment | NA              | 0     |
| S4_k141_93976                              | 2210  | No  | NA | 0    | 0 | Not-determined | Genome-fragment | NA              | 0     |
| S8-final-viral-combined_k141_105244  Full  | 6011  | Yes | NA | 1060 | 1 | 2              | Low-quality     | Genome-fragment | 82.37 |
| S4_k141_24152                              | 1554  | No  | NA | 0    | 1 | Not-determined | Genome-fragment | NA              | 0.67  |
| S4_k141_51482                              | 3105  | No  | NA | 0    | 2 | Not-determined | Genome-fragment | NA              | 0     |
| S4_k141_114613                             | 1168  | No  | NA | 0    | 1 | Not-determined | Genome-fragment | NA              | 0     |
| S4_k141_87078                              | 1015  | No  | NA | 0    | 0 | Not-determined | Genome-fragment | NA              | 0     |
| S4_k141_31518                              | 1054  | No  | NA | 0    | 1 | Not-determined | Genome-fragment | NA              | 0     |
| S4_k141_3416                               | 1103  | No  | NA | 0    | 1 | Not-determined | Genome-fragment | NA              | 0     |
| S4_k141_16913                              | 1165  | No  | NA | 0    | 0 | Not-determined | Genome-fragment | NA              | 0     |
| S4_k141_51489                              | 1583  | No  | NA | 0    | 0 | Not-determined | Genome-fragment | NA              | 0     |
| S4_k141_156701                             | 1012  | No  | NA | 0    | 1 | Not-determined | Genome-fragment | NA              | 0     |
| S4_k141_156704                             | 3108  | No  | NA | 0    | 2 | Not-determined | Genome-fragment | NA              | 0     |
| S2-final-viral-combined_k141_237374  Full  | 6013  | No  | NA | 0    | 0 | Low-quality    | Genome-fragment | NA              | 10.53 |
| S11-final-viral-combined_k141_234538  Full | 6014  | No  | NA | 4    | 0 | Low-quality    | Genome-fragment | NA              | 8.1   |
| S1_k141_2418                               | 6014  | No  | NA | 1    | 0 | Low-quality    | Genome-fragment | NA              | 9.44  |
| S4_k141_58879                              | 3157  | No  | NA | 0    | 0 | Not-determined | Genome-fragment | NA              | 0     |
| S8-final-viral-combined_k141_59906  Full   | 6014  | No  | NA | 1    | 0 | Low-quality    | Genome-fragment | NA              | 14.05 |
| S7_k141_50495                              | 6015  | No  | NA | 0    | 0 | Low-quality    | Genome-fragment | NA              | 15.41 |
| S4_k141_58905                              | 2792  | No  | NA | 0    | 3 | Not-determined | Genome-fragment | NA              | 0     |
| S4_k141_114661                             | 1240  | No  | NA | 0    | 0 | Not-determined | Genome-fragment | NA              | 0     |
| S4_k141_149688                             | 1721  | No  | NA | 0    | 1 | Not-determined | Genome-fragment | NA              | 0     |
| S4_k141_149701                             | 1245  | No  | NA | 0    | 1 | Not-determined | Genome-fragment | NA              | 0     |
| S4_k141_37978                              | 3178  | No  | NA | 0    | 3 | Not-determined | Genome-fragment | NA              | 0     |
| S4_k141_24243                              | 1614  | No  | NA | 0    | 1 | Not-determined | Genome-fragment | NA              | 0     |
| S4_k141_108179                             | 1859  | No  | NA | 0    | 1 | Not-determined | Genome-fragment | NA              | 0     |
| S4_k141_108183                             | 1110  | No  | NA | 0    | 1 | Not-determined | Genome-fragment | NA              | 0     |
| S4_k141_135809                             | 1452  | No  | NA | 0    | 1 | Not-determined | Genome-fragment | NA              | 0     |
| S4_k141_114723                             | 4152  | No  | NA | 0    | 4 | Not-determined | Genome-fragment | NA              | 0     |
| S4_k141_121356                             | 3717  | No  | NA | 0    | 2 | Not-determined | Genome-fragment | NA              | 0     |
| S4_k141_10503                              | 1439  | No  | NA | 0    | 0 | Not-determined | Genome-fragment | NA              | 0     |
| S4_k141_10521                              | 1952  | No  | NA | 0    | 0 | Not-determined | Genome-fragment | NA              | 0     |
| S4_k141_73303                              | 1968  | No  | NA | 0    | 0 | Not-determined | Genome-fragment | NA              | 0     |
| S9-final-viral-combined_k141_37634  Full   | 6018  | No  | NA | 0    | 0 | Low-quality    | Genome-fragment | NA              | 12.82 |
| S4_k141_114760                             | 1212  | No  | NA | 0    | 3 | Not-determined | Genome-fragment | NA              | 0     |
| S4_k141_66192                              | 1446  | No  | NA | 0    | 1 | Not-determined | Genome-fragment | NA              | 0     |
| S4_k141_3549                               | 1241  | No  | NA | 0    | 0 | Not-determined | Genome-fragment | NA              | 0     |
| S4_k141_73313                              | 1330  | No  | NA | 0    | 0 | Not-determined | Genome-fragment | NA              | 0     |
| S4_k141_163544                             | 1039  | No  | NA | 0    | 1 | Not-determined | Genome-fragment | NA              | 0     |
| S4_k141_24290                              | 2477  | No  | NA | 0    | 1 | Not-determined | Genome-fragment | NA              | 0     |
| S4-final-viral-combined_k141_83960  Full   | 6020  | No  | NA | 3    | 0 | Low-quality    | Genome-fragment | NA              | 5.22  |
| S6_k141_49254                              | 6022  | No  | NA | 0    | 6 | Low-quality    | Genome-fragment | NA              | 4.13  |
| S4_k141_156858                             | 1400  | No  | NA | 0    | 1 | Not-determined | Genome-fragment | NA              | 0     |
| S17-k141_176999                            | 6023  | No  | NA | 0    | 1 | Low-quality    | Genome-fragment | NA              | 6.23  |
| S4_k141_114772                             | 1016  | No  | NA | 0    | 2 | Not-determined | Genome-fragment | NA              | 0     |
| S9-final-viral-combined_k141_21658  Full   | 6025  | Yes | NA | 1706 | 1 | 1              | Low-quality     | Genome-fragment | 71.68 |
| S4_k141_24317                              | 1164  | No  | NA | 0    | 0 | Not-determined | Genome-fragment | NA              | 0     |
| S4_k141_100790                             | 1424  | No  | NA | 0    | 1 | Not-determined | Genome-fragment | NA              | 0     |
| S4_k141_156887                             | 1046  | No  | NA | 0    | 1 | Not-determined | Genome-fragment | NA              | 0     |
| S8_k141_4206                               | 6026  | No  | NA | 0    | 1 | Low-quality    | Genome-fragment | NA              | 10.07 |
| S4_k141_94118                              | 2778  | No  | NA | 0    | 6 | Not-determined | Genome-fragment | NA              | 0     |
| S7_k141_94629                              | 6030  | No  | NA | 1    | 2 | Low-quality    | Genome-fragment | NA              | 3.11  |
| S4_k141_94129                              | 1152  | No  | NA | 0    | 1 | Not-determined | Genome-fragment | NA              | 0     |
| S4_k141_80479                              | 1267  | No  | NA | 0    | 0 | Not-determined | Genome-fragment | NA              | 0     |
| S2_k141_248115                             | 6031  | No  | NA | 0    | 0 | Low-quality    | Genome-fragment | NA              | 10.07 |
| S4_k141_80487                              | 4592  | No  | NA | 0    | 2 | Not-determined | Genome-fragment | NA              | 0     |
| S4_k141_171000                             | 8051  | No  | NA | 0    | 2 | Not-determined | Genome-fragment | NA              | 0     |
| S4_k141_166214                             | 6032  | No  | NA | 0    | 4 | Low-quality    | Genome-fragment | NA              | 2.81  |
| S4_k141_156954                             | 1075  | No  | NA | 0    | 2 | Not-determined | Genome-fragment | NA              | 6.32  |
| S8-final-viral-combined_k141_110416  Full  | 6032  | No  | NA | 0    | 3 | Low-quality    | Genome-fragment | NA              | 0     |
| S4_k141_17119                              | 2413  | No  | NA | 0    | 3 | Not-determined | Genome-fragment | NA              | 0     |
| S4_k141_59073                              | 11739 | No  | NA | 0    | 7 | Not-determined | Genome-fragment | NA              | 0     |
| S4_k141_17125                              | 1730  | No  | NA | 0    | 1 | Not-determined | Genome-fragment | NA              | 0     |
| S4_k141_163609                             | 1539  | No  | NA | 0    | 0 | Not-determined | Genome-fragment | NA              | 0     |
| S4_k141_163612                             | 1007  | No  | NA | 0    | 2 | Not-determined | Genome-fragment | NA              | 0     |
| S12-final-viral-combined_k141_3634  Full   | 6033  | No  | NA | 4    | 1 | Low-quality    | Genome-fragment | NA              | 13.94 |
| S4_k141_59077                              | 10082 | No  | NA | 0    | 0 | Not-determined | Genome-fragment | NA              | 0     |
| S4_k141_108318                             | 1003  | No  | NA | 0    | 1 | Not-determined | Genome-fragment | NA              | 0     |
| S4_k141_80539                              | 1758  | No  | NA | 0    | 2 | Not-determined | Genome-fragment | NA              | 0     |
| S4_k141_156443                             | 1067  | No  | NA | 0    | 1 | Not-determined | Genome-fragment | NA              | 0     |
| S4_k141_114834                             | 1144  | No  | NA | 0    | 0 | Not-determined | Genome-fragment | NA              | 0     |
| S4_k141_17155                              | 4977  | No  | NA | 0    | 4 | Not-determined | Genome-fragment | NA              | 0     |
| S4_k141_108323                             | 1287  | No  | NA | 0    | 1 | Not-determined | Genome-fragment | NA              | 0     |
| S4_k141_45531                              | 1074  | No  | NA | 0    | 0 | Not-determined | Genome-fragment | NA              | 0     |
| S4_k141_45533                              | 2047  | No  | NA | 0    | 3 | Not-determined | Genome-fragment | NA              | 0     |
| S4_k141_108329                             | 2422  | No  | NA | 0    | 1 | Not-determined | Genome-fragment | NA              | 0     |
| S4_k141_80568                              | 1453  | No  | NA | 0    | 0 | Not-determined | Genome-fragment | NA              | 0     |
| S4_k141_59119                              | 1056  | No  | NA | 0    | 3 | Not-determined | Genome-fragment | NA              | 0     |
| S4_k141_108342                             | 1100  | No  | NA | 0    | 0 | Not-determined | Genome-fragment | NA              | 0     |
| S11-final-viral-combined_k141_279152  Full | 6034  | No  | NA | 4    | 0 | Low-quality    | Genome-fragment | NA              | 10.35 |
| S4_k141_31667                              | 1587  | No  | NA | 0    | 1 | Not-determined | Genome-fragment | NA              | 0     |
| S4_k141_157056                             | 1119  | No  | NA | 0    | 0 | Not-determined | Genome-fragment | NA              | 0     |
| S4_k141_143141                             | 1189  | No  | NA | 0    | 0 | Not-determined | Genome-fragment | NA              | 0     |
| S4_k141_24458                              | 1048  | No  | NA | 0    | 1 | Not-determined | Genome-fragment | NA              | 0     |
| S4_k141_136008                             | 8933  | No  | NA | 0    | 3 | Not-determined | Genome-fragment | NA              | 0     |
| S4_k141_24465                              | 2480  | No  | NA | 0    | 4 | Not-determined | Genome-fragment | NA              | 0     |
| S1_k141_170112                             | 6034  | No  | NA | 0    | 0 | Low-quality    | Genome-fragment | NA              | 13.61 |
| S4_k141_87266                              | 5452  | No  | NA | 0    | 0 | Not-determined | Genome-fragment | NA              | 0     |
| S4_k141_108391                             | 1145  | No  | NA | 0    | 0 | Not-determined | Genome-fragment | NA              | 0     |
| S4_k141_100941                             | 4766  | No  | NA | 0    | 1 | Not-determined | Genome-fragment | NA              | 0     |
| S4_k141_73505                              | 2250  | No  | NA | 0    | 1 | Not-determined | Genome-fragment | NA              | 0     |
| S4_k141_145966                             | 1528  | No  | NA | 0    | 0 | Not-determined | Genome-fragment | NA              | 0     |
| S4_k141_51709                              | 1470  | No  | NA | 0    | 0 | Not-determined | Genome-fragment | NA              | 0     |
| S4_k141_38234                              | 1028  | No  | NA | 0    | 1 | Not-determined | Genome-fragment | NA              | 0     |
| S4_k141_94283                              | 4002  | No  | NA | 0    | 2 | Not-determined | Genome-fragment | NA              | 0     |
| S4_k141_3886                               | 2746  | No  | NA | 0    | 0 | Not-determined | Genome-fragment | NA              | 0     |
| S4_k141_45568                              | 1007  | No  | NA | 0    | 0 | Not-determined | Genome-fragment | NA              | 0     |
| S4_k141_121582                             | 2758  | No  | NA | 0    | 1 | Not-determined | Genome-fragment | NA              | 0     |
| S4_k141_157136                             | 2261  | No  | NA | 0    | 0 | Not-determined | Genome-fragment | NA              | 0     |
| S2-final-viral-combined_k141_34133  Full   | 6034  | No  | NA | 0    | 0 | Low-quality    | Genome-fragment | NA              | 4.4   |
| S4_k141_66433                              | 3049  | No  | NA | 0    | 0 | Not-determined | Genome-fragment | NA              | 0     |
| S4_k141_94325                              | 1754  | No  | NA | 0    | 1 | Not-determined | Genome-fragment | NA              | 0     |
| S4_k141_128940                             | 2007  | No  | NA | 0    | 0 | Not-determined | Genome-fragment | NA              | 0     |
| S4_k141_45607                              | 1127  | No  | NA | 0    | 0 | Not-determined | Genome-fragment | NA              | 0     |
| S4_k141_121611                             | 1555  | No  | NA | 0    | 1 | Not-determined | Genome-fragment | NA              | 0     |
| S4_k141_45616                              | 1024  | No  | NA | 0    | 0 | Not-determined | Genome-fragment | NA              | 0     |
| S8-final-viral-combined_k141_186939  Full  | 6036  | No  | NA | 0    | 2 | Low-quality    | Genome-fragment | NA              | 10.98 |
| S4_k141_24552                              | 4399  | No  | NA | 0    | 2 | Not-determined | Genome-fragment | NA              | 0     |
| S4_k141_136124                             | 1291  | No  | NA | 0    | 0 | Not-determined | Genome-fragment | NA              | 0     |
| S1-final-viral-combined_k141_316933  Full  | 6039  | No  | NA | 0    | 1 | Low-quality    | Genome-fragment | NA              | 5.58  |
| S11-final-viral-combined_k141_21379  Full  | 6039  | No  | NA | 2    | 0 | Low-quality    | Genome-fragment | NA              | 4.78  |
| S4_k141_150020                             | 1670  | No  | NA | 0    | 1 | Not-determined | Genome-fragment | NA              | 0     |
| S4_k141_143132                             | 2513  | No  | NA | 0    | 0 | Not-determined | Genome-fragment | NA              | 0     |
| S17-k141_230048                            | 6043  | No  | NA | 1    | 5 | Low-quality    | Genome-fragment | NA              | 1.79  |
| S4_k141_163738                             | 6535  | No  | NA | 0    | 5 | Not-determined | Genome-fragment | NA              | 0     |
| S11-final-v                                |       |     |    |      |   |                |                 |                 |       |



|                                      |       |     |    |   |   |                |                 |    |       |
|--------------------------------------|-------|-----|----|---|---|----------------|-----------------|----|-------|
| S4_k141_51898                        | 5288  | No  | NA | 0 | 3 | Not-determined | Genome-fragment | NA | 0     |
| S4_k141_136207                       | 1024  | No  | NA | 0 | 0 | Not-determined | Genome-fragment | NA | 0     |
| S4_k141_59355                        | 1151  | No  | NA | 0 | 0 | Not-determined | Genome-fragment | NA | 0     |
| S4_k141_115107                       | 7888  | No  | NA | 0 | 0 | Not-determined | Genome-fragment | NA | 0     |
| S2-final-viral-combined_k141_24432   | 6059  | Yes | NA | 1 | 1 | Low-quality    | Genome-fragment | NA | 12.17 |
| S4_k141_3896                         | 1102  | No  | NA | 0 | 1 | Not-determined | Genome-fragment | NA | 0     |
| S2-final-viral-combined_k141_113900  | 6059  | No  | NA | 1 | 0 | Low-quality    | Genome-fragment | NA | 4.64  |
| S4_k141_73706                        | 1121  | No  | NA | 0 | 1 | Not-determined | Genome-fragment | NA | 0     |
| S1-final-viral-combined_k141_357126  | 6062  | No  | NA | 0 | 1 | Low-quality    | Genome-fragment | NA | 39.21 |
| S4_k141_101135                       | 6398  | No  | NA | 0 | 0 | Not-determined | Genome-fragment | NA | 0     |
| S4_k141_121705                       | 1461  | No  | NA | 0 | 0 | Not-determined | Genome-fragment | NA | 0     |
| S4_k141_66647                        | 1121  | No  | NA | 0 | 1 | Not-determined | Genome-fragment | NA | 0     |
| S4_k141_108583                       | 3029  | No  | NA | 0 | 2 | Not-determined | Genome-fragment | NA | 0     |
| S4_k141_94510                        | 3142  | No  | NA | 0 | 4 | Not-determined | Genome-fragment | NA | 0     |
| S11-final-viral-combined_k141_240862 | 6063  | No  | NA | 0 | 4 | Low-quality    | Genome-fragment | NA | 6.44  |
| S2-final-viral-combined_k141_128980  | 6063  | No  | NA | 2 | 0 | Low-quality    | Genome-fragment | NA | 14.6  |
| S4_k141_3957                         | 1306  | No  | NA | 0 | 2 | Not-determined | Genome-fragment | NA | 0     |
| S4_k141_80827                        | 2038  | No  | NA | 0 | 0 | Not-determined | Genome-fragment | NA | 0     |
| S4_k141_108609                       | 1402  | No  | NA | 0 | 1 | Not-determined | Genome-fragment | NA | 0     |
| S4_k141_3968                         | 2700  | No  | NA | 0 | 1 | Not-determined | Genome-fragment | NA | 0     |
| S4_k141_163918                       | 13542 | No  | NA | 0 | 6 | Not-determined | Genome-fragment | NA | 0     |
| S4_k141_157295                       | 1540  | No  | NA | 0 | 2 | Not-determined | Genome-fragment | NA | 0     |
| S4_k141_38487                        | 1096  | No  | NA | 0 | 0 | Not-determined | Genome-fragment | NA | 0     |
| S4_k141_59409                        | 5779  | No  | NA | 0 | 5 | Not-determined | Genome-fragment | NA | 0     |
| S4_k141_94561                        | 1054  | No  | NA | 0 | 0 | Not-determined | Genome-fragment | NA | 0     |
| S4_k141_73708                        | 4798  | No  | NA | 0 | 0 | Not-determined | Genome-fragment | NA | 0     |
| S4_k141_129157                       | 1200  | No  | NA | 0 | 1 | Not-determined | Genome-fragment | NA | 0     |
| S4_k141_163983                       | 1319  | No  | NA | 0 | 3 | Not-determined | Genome-fragment | NA | 0     |
| S4_k141_143503                       | 1789  | No  | NA | 0 | 1 | Not-determined | Genome-fragment | NA | 0     |
| S4_k141_94575                        | 1081  | No  | NA | 0 | 1 | Not-determined | Genome-fragment | NA | 0     |
| S4_k141_80899                        | 1774  | No  | NA | 0 | 1 | Not-determined | Genome-fragment | NA | 0     |
| S4_k141_38516                        | 1467  | No  | NA | 0 | 3 | Not-determined | Genome-fragment | NA | 0     |
| S2_k141_130789                       | 6064  | No  | NA | 0 | 1 | Low-quality    | Genome-fragment | NA | 7.52  |
| S4_k141_143515                       | 4884  | No  | NA | 0 | 3 | Not-determined | Genome-fragment | NA | 0     |
| S4_k141_80903                        | 2034  | No  | NA | 0 | 0 | Not-determined | Genome-fragment | NA | 0     |
| S4_k141_4002                         | 1224  | No  | NA | 0 | 0 | Not-determined | Genome-fragment | NA | 0     |
| S4_k141_121774                       | 1030  | No  | NA | 0 | 1 | Not-determined | Genome-fragment | NA | 0     |
| S4_k141_136338                       | 1205  | No  | NA | 0 | 1 | Not-determined | Genome-fragment | NA | 0     |
| S4_k141_173138                       | 1104  | No  | NA | 0 | 1 | Not-determined | Genome-fragment | NA | 0     |
| S1-final-viral-combined_k141_297766  | 6065  | No  | NA | 5 | 0 | Low-quality    | Genome-fragment | NA | 13.84 |
| S4_k141_80939                        | 1436  | No  | NA | 0 | 0 | Not-determined | Genome-fragment | NA | 0     |
| S4_k141_24795                        | 2018  | No  | NA | 0 | 2 | Not-determined | Genome-fragment | NA | 0     |
| S4-final-viral-combined_k141_33890   | 6068  | No  | NA | 0 | 4 | Low-quality    | Genome-fragment | NA | 2.54  |
| S4_k141_87482                        | 1495  | No  | NA | 0 | 2 | Not-determined | Genome-fragment | NA | 0     |
| S4_k141_80956                        | 1236  | No  | NA | 0 | 0 | Not-determined | Genome-fragment | NA | 0     |
| S4_k141_94633                        | 6435  | No  | NA | 0 | 3 | Not-determined | Genome-fragment | NA | 0     |
| S4_k141_31596                        | 1050  | No  | NA | 0 | 0 | Not-determined | Genome-fragment | NA | 0     |
| S4_k141_4051                         | 1055  | No  | NA | 0 | 1 | Not-determined | Genome-fragment | NA | 0     |
| S4_k141_66754                        | 4601  | No  | NA | 0 | 1 | Not-determined | Genome-fragment | NA | 0     |
| S4_k141_121805                       | 1225  | No  | NA | 0 | 1 | Not-determined | Genome-fragment | NA | 0     |
| S4_k141_94544                        | 3125  | No  | NA | 0 | 2 | Not-determined | Genome-fragment | NA | 0     |
| S4_k141_101293                       | 2361  | No  | NA | 0 | 1 | Not-determined | Genome-fragment | NA | 0     |
| S11-final-viral-combined_k141_225302 | 6069  | No  | NA | 1 | 0 | Low-quality    | Genome-fragment | NA | 12.56 |
| S4_k141_32027                        | 12765 | No  | NA | 0 | 7 | Not-determined | Genome-fragment | NA | 0     |
| S4_k141_150218                       | 1166  | No  | NA | 0 | 1 | Not-determined | Genome-fragment | NA | 0     |
| S2-final-viral-combined_k141_232748  | 6069  | No  | NA | 2 | 0 | Low-quality    | Genome-fragment | NA | 12.68 |
| S4_k141_38605                        | 1040  | No  | NA | 0 | 0 | Not-determined | Genome-fragment | NA | 0     |
| S4_k141_32040                        | 1254  | No  | NA | 0 | 1 | Not-determined | Genome-fragment | NA | 0     |
| S4_k141_59485                        | 1564  | No  | NA | 0 | 1 | Not-determined | Genome-fragment | NA | 0     |
| S4_k141_11036                        | 1080  | No  | NA | 0 | 1 | Not-determined | Genome-fragment | NA | 0     |
| S4_k141_46000                        | 4224  | No  | NA | 0 | 2 | Not-determined | Genome-fragment | NA | 0     |
| S3-final-viral-combined_k141_135181  | 6070  | No  | NA | 1 | 0 | Low-quality    | Genome-fragment | NA | 9.74  |
| S4_k141_157345                       | 2025  | No  | NA | 0 | 4 | Not-determined | Genome-fragment | NA | 0     |
| S4_k141_46006                        | 1356  | No  | NA | 0 | 1 | Not-determined | Genome-fragment | NA | 0     |
| S4_k141_51013                        | 1403  | No  | NA | 0 | 0 | Not-determined | Genome-fragment | NA | 0     |
| S11_k141_330503                      | 6071  | No  | NA | 0 | 7 | Low-quality    | Genome-fragment | NA | 5.33  |
| S4_k141_101394                       | 4152  | No  | NA | 0 | 3 | Not-determined | Genome-fragment | NA | 0     |
| S4_k141_157375                       | 8419  | No  | NA | 0 | 4 | Not-determined | Genome-fragment | NA | 0     |
| S4_k141_157383                       | 1573  | No  | NA | 0 | 1 | Not-determined | Genome-fragment | NA | 0     |
| S4_k141_81051                        | 3783  | No  | NA | 0 | 3 | Not-determined | Genome-fragment | NA | 0     |
| S4_k141_129341                       | 1096  | No  | NA | 0 | 0 | Not-determined | Genome-fragment | NA | 0     |
| S4_k141_136360                       | 1095  | No  | NA | 0 | 1 | Not-determined | Genome-fragment | NA | 0     |
| S4_k141_11149                        | 1335  | No  | NA | 0 | 1 | Not-determined | Genome-fragment | NA | 0     |
| S4_k141_38664                        | 3461  | No  | NA | 0 | 1 | Not-determined | Genome-fragment | NA | 0     |
| S4_k141_87621                        | 1814  | No  | NA | 0 | 0 | Not-determined | Genome-fragment | NA | 0     |
| S4_k141_59551                        | 1208  | No  | NA | 0 | 1 | Not-determined | Genome-fragment | NA | 0     |
| S4_k141_11170                        | 8012  | No  | NA | 0 | 1 | Not-determined | Genome-fragment | NA | 0     |
| S4_k141_63278                        | 6073  | No  | NA | 0 | 2 | Low-quality    | Genome-fragment | NA | 4.35  |
| S4_k141_38695                        | 5528  | No  | NA | 0 | 3 | Not-determined | Genome-fragment | NA | 0     |
| S4_k141_66926                        | 1072  | No  | NA | 0 | 0 | Not-determined | Genome-fragment | NA | 0     |
| S4-final-viral-combined_k141_93204   | 6074  | No  | NA | 0 | 3 | Low-quality    | Genome-fragment | NA | 6.83  |
| S4_k141_11195                        | 1300  | No  | NA | 0 | 1 | Not-determined | Genome-fragment | NA | 0     |
| S4_k141_101463                       | 8554  | No  | NA | 0 | 4 | Not-determined | Genome-fragment | NA | 0     |
| S4_k141_121971                       | 1363  | No  | NA | 0 | 2 | Not-determined | Genome-fragment | NA | 0     |
| S1-final-viral-combined_k141_341489  | 6076  | No  | NA | 1 | 0 | Low-quality    | Genome-fragment | NA | 38.67 |
| S4_k141_17503                        | 1370  | No  | NA | 0 | 0 | Not-determined | Genome-fragment | NA | 0     |
| S3_k141_56708                        | 6076  | No  | NA | 0 | 0 | Low-quality    | Genome-fragment | NA | 2.8   |
| S4_k141_32126                        | 1152  | No  | NA | 0 | 0 | Not-determined | Genome-fragment | NA | 0     |
| S2-final-viral-combined_k141_115833  | 6078  | No  | NA | 0 | 0 | Low-quality    | Genome-fragment | NA | 14.37 |
| S4_k141_139882                       | 6078  | No  | NA | 0 | 3 | Low-quality    | Genome-fragment | NA | 3.41  |
| S4_k141_32155                        | 1225  | No  | NA | 0 | 1 | Not-determined | Genome-fragment | NA | 0     |
| S4_k141_164272                       | 1753  | No  | NA | 0 | 0 | Not-determined | Genome-fragment | NA | 0     |
| S4_k141_81135                        | 11723 | No  | NA | 0 | 7 | Not-determined | Genome-fragment | NA | 0     |
| S4_k141_11230                        | 1171  | No  | NA | 0 | 1 | Not-determined | Genome-fragment | NA | 0     |
| S4_k141_73990                        | 67580 | No  | NA | 7 | 0 | Medium-quality | Genome-fragment | NA | 67.53 |
| S4_k141_25026                        | 1273  | No  | NA | 0 | 1 | Not-determined | Genome-fragment | NA | 0     |
| S4_k141_38755                        | 1114  | No  | NA | 0 | 0 | Not-determined | Genome-fragment | NA | 0     |
| S4_k141_143719                       | 4022  | No  | NA | 0 | 2 | Not-determined | Genome-fragment | NA | 0     |
| S4_k141_81152                        | 1408  | No  | NA | 0 | 1 | Not-determined | Genome-fragment | NA | 0     |
| S4_k141_87694                        | 1092  | No  | NA | 0 | 1 | Not-determined | Genome-fragment | NA | 0     |
| S4_k141_32188                        | 2819  | No  | NA | 0 | 1 | Not-determined | Genome-fragment | NA | 0     |
| S1-final-viral-combined_k141_41039   | 6079  | No  | NA | 4 | 0 | Low-quality    | Genome-fragment | NA | 12.84 |
| S4_k141_143756                       | 1553  | No  | NA | 0 | 0 | Not-determined | Genome-fragment | NA | 0     |
| S4_k141_136503                       | 1227  | No  | NA | 0 | 0 | Not-determined | Genome-fragment | NA | 0     |
| S4_k141_164112                       | 5453  | No  | NA | 0 | 2 | Not-determined | Genome-fragment | NA | 0     |
| S1-final-viral-combined_k141_32406   | 6083  | No  | NA | 3 | 0 | Low-quality    | Genome-fragment | NA | 15.58 |
| S4_k141_32218                        | 1477  | No  | NA | 0 | 0 | Not-determined | Genome-fragment | NA | 0     |
| S4_k141_109108                       | 1046  | No  | NA | 0 | 1 | Not-determined | Genome-fragment | NA | 0     |
| S4_k141_4235                         | 1055  | No  | NA | 0 | 0 | Not-determined | Genome-fragment | NA | 0     |
| S4_k141_94837                        | 3221  | No  | NA | 0 | 2 | Not-determined | Genome-fragment | NA | 0     |
| S4_k141_136527                       | 1484  | No  | NA | 0 | 0 | Not-determined | Genome-fragment | NA | 0     |
| S4_k141_109033                       | 1405  | No  | NA | 0 | 1 | Not-determined | Genome-fragment | NA | 0     |
| S4_k141_32230                        | 4113  | No  | NA | 0 | 3 | Not-determined | Genome-fragment | NA | 0     |
| S4_k141_109039                       | 3612  | No  | NA | 0 | 1 | Not-determined | Genome-fragment | NA | 0     |
| S4_k141_22162                        | 4662  | No  | NA | 0 | 2 | Not-determined | Genome-fragment | NA | 0     |
| S17-final-viral-combined_k141_197927 | 6084  | No  | NA | 0 | 1 | Low-quality    | Genome-fragment | NA | 1.17  |
| S17-final-viral-combined_k141_84022  | 6085  | No  | NA | 4 | 0 | Low-quality    | Genome-fragment | NA | 17.11 |
| S4_k141_67063                        | 1369  | No  | NA | 0 | 1 | Not-determined | Genome-fragment | NA | 0     |
| S4_k141_52337                        | 3177  | No  | NA | 0 | 0 | Not-determined | Genome-fragment | NA | 0     |
| S8-final-viral-combined_k141_231375  | 6088  | No  | NA | 3 | 0 | Low-quality    | Genome-fragment | NA | 8.57  |
| S4_k141_38861                        | 3718  | No  | NA | 0 | 4 | Not-determined | Genome-fragment | NA | 0     |
| S4_k141_164380                       | 3873  | No  | NA | 0 | 0 | Not-determined | Genome-fragment | NA | 0     |
| S4_k141_11319                        | 3950  | No  | NA | 0 | 2 | Not-determined | Genome-fragment | NA | 0     |
| S4_k141_87790                        | 2274  | No  | NA | 0 | 0 | Not-determined | Genome-fragment | NA | 0     |
| S4_k141_129568                       | 1708  | No  | NA | 0 | 5 | Not-determined | Genome-fragment | NA | 0     |
| S4_k141_164397                       | 1352  | No  | NA | 0 | 1 | Not-determined | Genome-fragment | NA | 0     |
| S4_k141_4305                         | 1048  | No  | NA | 0 | 0 | Not-determined | Genome-fragment | NA | 0     |
| S4_k141_94825                        | 1217  | No  | NA | 0 | 1 | Not-determined | Genome-fragment | NA | 0     |
| S4_k141_46290                        | 1052  | No  | NA | 0 | 2 | Not-determined | Genome-fragment | NA | 0     |
| S4_k141_25144                        | 1561  | No  | NA | 0 | 1 | Not-determined | Genome-fragment | NA | 0     |
| S4_k141_109121                       | 1330  | No  | NA | 0 | 1 | Not-determined | Genome-fragment | NA | 0     |
| S4_k141_17540                        | 1008  | No  | NA | 0 | 0 | Not-determined | Genome-fragment | NA | 0     |
| S4_k141_122021                       | 3402  | No  | NA | 0 | 2 | Not-determined | Genome-fragment | NA | 0     |
| S4_k141_67111                        | 1784  | No  | NA | 0 | 1 | Not-determined | Genome-fragment | NA | 0     |
| S2-final-viral-combined_k141_151204  | 6094  | No  | NA | 1 | 0 | Low-quality    | Genome-fragment | NA | 11.2  |
| S2-final-viral-combined_k141_165218  | 6096  | No  | NA | 1 | 0 | Low-quality    | Genome-fragment | NA | 12.49 |
| S4_k141_74146                        | 1128  | No  | NA | 0 | 1 | Not-determined | Genome-fragment | NA | 0     |
| S12_k141_172207                      | 6099  | No  | NA | 0 | 3 | Low-quality    | Genome-fragment | NA | 2.28  |
| S4_k141_46328                        | 1001  | No  | NA | 0 | 1 | Not-determined | Genome-fragment | NA | 0     |
| S8_k141_116822                       | 6099  | No  | NA | 0 | 1 | Low-quality    | Genome-fragment | NA | 6.05  |
| S4_k141_150537                       | 1645  | No  | NA | 0 | 2 | Not-determined | Genome-fragment | NA | 0     |
| S12-final-viral-combined_k141_304113 | 6100  | No  | NA | 1 | 0 | Low-quality    | Genome-fragment | NA | 8.55  |
| S4_k141_164424                       | 1708  | No  | NA | 0 | 0 | Not-determined | Genome-fragment | NA | 0     |
| S4_k141_129629                       | 3219  | No  | NA | 0 | 2 | Not-determined | Genome-fragment | NA | 0     |
| S4_k141_74179                        | 1153  | No  | NA | 0 | 1 | Not-determined | Genome-fragment | NA | 0     |
| S1-final-viral-combined_k141_3157    | 6102  | No  | NA | 1 | 2 | Low-quality    | Genome-fragment | NA | 14.25 |
| S8_k141_92218                        | 6103  | No  | NA | 1 | 2 | Low-quality    | Genome-fragment | NA | 7.78  |
| S4_k141_115509                       | 3089  |     |    |   |   |                |                 |    |       |



|                                              |       |     |    |      |   |                |                 |                 |       |       |
|----------------------------------------------|-------|-----|----|------|---|----------------|-----------------|-----------------|-------|-------|
| S4_k141_136749                               | 2735  | No  | NA | 0    | 2 | Not-determined | Genome-fragment | NA              | 0     | 0     |
| S4_k141_11451                                | 1108  | No  | NA | 0    | 2 | Not-determined | Genome-fragment | NA              | 0     | 0     |
| S4_k141_74301                                | 1123  | No  | NA | 0    | 0 | Not-determined | Genome-fragment | NA              | 0     | 0     |
| S4_k141_11453                                | 1185  | No  | NA | 0    | 0 | Not-determined | Genome-fragment | NA              | 0     | 0     |
| S4_k141_136755                               | 1276  | No  | NA | 0    | 1 | Not-determined | Genome-fragment | NA              | 0     | 0     |
| S4_k141_25518                                | 4414  | No  | NA | 0    | 2 | Not-determined | Genome-fragment | NA              | 0     | 0     |
| S4_k141_157747                               | 4559  | No  | NA | 0    | 3 | Not-determined | Genome-fragment | NA              | 0     | 0     |
| S17_k141_20876                               | 6111  | No  | NA | 0    | 2 | Low-quality    | Genome-fragment | NA              | 3.72  | 0     |
| S4_k141_139478                               | 1351  | No  | NA | 0    | 1 | Not-determined | Genome-fragment | NA              | 0     | 0     |
| S4_k141_129679                               | 1189  | No  | NA | 0    | 1 | Not-determined | Genome-fragment | NA              | 0     | 0     |
| S11-final-viral-combined_k141_292248  [full] | 6112  | No  | NA | 0    | 3 | Low-quality    | Genome-fragment | NA              | 2.95  | 0     |
| S4_k141_142967                               | 1253  | No  | NA | 0    | 1 | Not-determined | Genome-fragment | NA              | 0     | 0     |
| S4_k141_39062                                | 1231  | No  | NA | 0    | 1 | Not-determined | Genome-fragment | NA              | 0     | 0     |
| S4_k141_157789                               | 1120  | No  | NA | 0    | 0 | Not-determined | Genome-fragment | NA              | 0     | 0     |
| S4_k141_59914                                | 2073  | No  | NA | 0    | 1 | Not-determined | Genome-fragment | NA              | 0     | 0     |
| S4_k141_25555                                | 1829  | No  | NA | 0    | 1 | Not-determined | Genome-fragment | NA              | 0     | 0     |
| S4_k141_164575                               | 1138  | No  | NA | 0    | 0 | Not-determined | Genome-fragment | NA              | 0     | 0     |
| S7_k141_111365                               | 6112  | No  | NA | 0    | 1 | Low-quality    | Genome-fragment | NA              | 11.14 | 0     |
| S4_k141_74243                                | 1722  | No  | NA | 0    | 2 | Not-determined | Genome-fragment | NA              | 0     | 0     |
| S1-final-viral-combined_k141_52457  [full]   | 6114  | No  | NA | 0    | 1 | Low-quality    | Genome-fragment | NA              | 15.19 | 0     |
| S6-final-viral-combined_k141_129984  [full]  | 6114  | No  | NA | 0    | 0 | Low-quality    | Genome-fragment | NA              | 15.07 | 0     |
| S4_k141_17690                                | 1962  | No  | NA | 0    | 1 | Not-determined | Genome-fragment | NA              | 0     | 0     |
| S4_k141_52549                                | 1199  | No  | NA | 0    | 0 | Not-determined | Genome-fragment | NA              | 0     | 0     |
| S4_k141_52551                                | 1114  | No  | NA | 0    | 0 | Not-determined | Genome-fragment | NA              | 0     | 0     |
| S4_k141_150684                               | 1327  | No  | NA | 0    | 1 | Not-determined | Genome-fragment | NA              | 0     | 0     |
| S11_k141_170635                              | 6120  | No  | NA | 1    | 0 | Low-quality    | Genome-fragment | NA              | 12.93 | 0     |
| S4_k141_122212                               | 2769  | No  | NA | 0    | 2 | Not-determined | Genome-fragment | NA              | 0     | 0     |
| S4_k141_115629                               | 1015  | No  | NA | 0    | 1 | Not-determined | Genome-fragment | NA              | 0     | 0     |
| S4_k141_136820                               | 1618  | No  | NA | 0    | 1 | Not-determined | Genome-fragment | NA              | 0     | 0     |
| S4_k141_157843                               | 1123  | No  | NA | 0    | 0 | Not-determined | Genome-fragment | NA              | 0     | 0     |
| S4_k141_52604                                | 1123  | No  | NA | 0    | 1 | Not-determined | Genome-fragment | NA              | 0     | 0     |
| S4_k141_144044                               | 1309  | No  | NA | 0    | 1 | Not-determined | Genome-fragment | NA              | 0     | 0     |
| S4_k141_52610                                | 4295  | No  | NA | 0    | 3 | Not-determined | Genome-fragment | NA              | 0     | 0     |
| S12_k141_260841                              | 6123  | No  | NA | 3    | 0 | Low-quality    | Genome-fragment | NA              | 10.73 | 0     |
| S4_k141_32517                                | 4255  | No  | NA | 0    | 3 | Not-determined | Genome-fragment | NA              | 0     | 0     |
| S4_k141_88019                                | 1281  | No  | NA | 0    | 0 | Not-determined | Genome-fragment | NA              | 0     | 0     |
| S4_k141_25334                                | 1894  | No  | NA | 0    | 0 | Not-determined | Genome-fragment | NA              | 0     | 0     |
| S4_k141_32534                                | 1314  | No  | NA | 0    | 1 | Not-determined | Genome-fragment | NA              | 0     | 0     |
| S4_k141_129696                               | 6064  | No  | NA | 0    | 4 | Not-determined | Genome-fragment | NA              | 0     | 0     |
| S4_k141_101866                               | 1928  | No  | NA | 0    | 0 | Not-determined | Genome-fragment | NA              | 0     | 0     |
| S1-final-viral-combined_k141_340440  [full]  | 6133  | No  | NA | 1    | 0 | Low-quality    | Genome-fragment | NA              | 39.55 | 0     |
| S6_k141_45688                                | 6133  | No  | NA | 0    | 2 | Low-quality    | Genome-fragment | NA              | 1.02  | 0     |
| S4_k141_164646                               | 3381  | No  | NA | 0    | 0 | Not-determined | Genome-fragment | NA              | 0     | 0     |
| S17-final-viral-combined_k141_157167  [full] | 6140  | Yes | NA | 4472 | 3 | 1              | Low-quality     | Genome-fragment | 5.43  | 27.17 |
| S6-final-viral-combined_k141_11983  [full]   | 6143  | No  | NA | 0    | 0 | Low-quality    | Genome-fragment | NA              | 5.83  | 0     |
| S4_k141_23563                                | 1003  | No  | NA | 0    | 1 | Not-determined | Genome-fragment | NA              | 0     | 0     |
| S5-final-viral-combined_k141_153728  [full]  | 6144  | No  | NA | 0    | 5 | Low-quality    | Genome-fragment | NA              | 4.11  | 0     |
| S4_k141_81599                                | 1092  | No  | NA | 0    | 0 | Not-determined | Genome-fragment | NA              | 0     | 0     |
| S4_k141_150716                               | 1579  | No  | NA | 0    | 1 | Not-determined | Genome-fragment | NA              | 0     | 0     |
| S1-final-viral-combined_k141_332984  [full]  | 6146  | No  | NA | 5    | 0 | Low-quality    | Genome-fragment | NA              | 14.66 | 0     |
| S2-final-viral-combined_k141_4741  [full]    | 6147  | No  | NA | 7    | 0 | Low-quality    | Genome-fragment | NA              | 11.19 | 0     |
| S4_k141_164662                               | 1725  | No  | NA | 0    | 0 | Not-determined | Genome-fragment | NA              | 0     | 0     |
| S4_k141_157893                               | 12743 | No  | NA | 0    | 7 | Not-determined | Genome-fragment | NA              | 0     | 0     |
| S4_k141_59995                                | 1642  | No  | NA | 0    | 0 | Not-determined | Genome-fragment | NA              | 0     | 0     |
| S4_k141_25283                                | 1156  | No  | NA | 0    | 1 | Not-determined | Genome-fragment | NA              | 0     | 0     |
| S4_k141_52679                                | 1078  | No  | NA | 0    | 0 | Not-determined | Genome-fragment | NA              | 0     | 0     |
| S4_k141_157911                               | 4086  | No  | NA | 0    | 3 | Not-determined | Genome-fragment | NA              | 0     | 0     |
| S4_k141_67386                                | 2827  | No  | NA | 0    | 0 | Not-determined | Genome-fragment | NA              | 0     | 0     |
| S4_k141_74451                                | 1168  | No  | NA | 0    | 0 | Not-determined | Genome-fragment | NA              | 0     | 0     |
| S4_k141_74455                                | 1081  | No  | NA | 0    | 2 | Not-determined | Genome-fragment | NA              | 0     | 0     |
| S4_k141_11654                                | 2401  | No  | NA | 0    | 2 | Not-determined | Genome-fragment | NA              | 0     | 0     |
| S8-final-viral-combined_k141_207503  [full]  | 6147  | No  | NA | 1    | 1 | Low-quality    | Genome-fragment | NA              | 10.6  | 0     |
| S6-final-viral-combined_k141_140230  [full]  | 6148  | No  | NA | 0    | 1 | Low-quality    | Genome-fragment | NA              | 6.27  | 0     |
| S1-final-viral-combined_k141_159320  [full]  | 6150  | Yes | NA | 3148 | 1 | 2              | Low-quality     | Genome-fragment | 2.34  | 48.81 |
| S4_k141_4509                                 | 1962  | No  | NA | 0    | 2 | Not-determined | Genome-fragment | NA              | 0     | 0     |
| S4_k141_101963                               | 1802  | No  | NA | 0    | 2 | Not-determined | Genome-fragment | NA              | 0     | 0     |
| S4_k141_17819                                | 1286  | No  | NA | 0    | 1 | Not-determined | Genome-fragment | NA              | 0     | 0     |
| S4_k141_81668                                | 1091  | No  | NA | 0    | 0 | Not-determined | Genome-fragment | NA              | 0     | 0     |
| S4_k141_52736                                | 1967  | No  | NA | 0    | 0 | Not-determined | Genome-fragment | NA              | 0     | 0     |
| S4_k141_39228                                | 1138  | No  | NA | 0    | 1 | Not-determined | Genome-fragment | NA              | 0     | 0     |
| S4_k141_81687                                | 1750  | No  | NA | 0    | 2 | Not-determined | Genome-fragment | NA              | 0     | 0     |
| S4_k141_116094                               | 1369  | No  | NA | 0    | 0 | Not-determined | Genome-fragment | NA              | 0     | 0     |
| S4_k141_164748                               | 2180  | No  | NA | 0    | 1 | Not-determined | Genome-fragment | NA              | 0     | 0     |
| S17-final-viral-combined_k141_104931  [full] | 6152  | No  | NA | 3    | 0 | Low-quality    | Genome-fragment | NA              | 13.95 | 0     |
| S4_k141_109461                               | 1021  | No  | NA | 0    | 0 | Not-determined | Genome-fragment | NA              | 0     | 0     |
| S2-final-viral-combined_k141_196024  [full]  | 6152  | No  | NA | 0    | 1 | Low-quality    | Genome-fragment | NA              | 15.11 | 0     |
| S4_k141_60085                                | 1592  | No  | NA | 0    | 2 | Not-determined | Genome-fragment | NA              | 0     | 0     |
| S4_k141_122391                               | 1422  | No  | NA | 0    | 0 | Not-determined | Genome-fragment | NA              | 0     | 0     |
| S4_k141_4578                                 | 1170  | No  | NA | 0    | 0 | Not-determined | Genome-fragment | NA              | 0     | 0     |
| S4_k141_60115                                | 1636  | No  | NA | 0    | 1 | Not-determined | Genome-fragment | NA              | 0     | 0     |
| S4_k141_150828                               | 1212  | No  | NA | 0    | 0 | Not-determined | Genome-fragment | NA              | 0     | 0     |
| S4_k141_1508405                              | 1054  | No  | NA | 0    | 0 | Not-determined | Genome-fragment | NA              | 0     | 0     |
| S4_k141_67528                                | 3174  | No  | NA | 0    | 3 | Not-determined | Genome-fragment | NA              | 0     | 0     |
| S4_k141_95242                                | 1101  | No  | NA | 0    | 1 | Not-determined | Genome-fragment | NA              | 0     | 0     |
| S4_k141_17820                                | 3127  | No  | NA | 0    | 3 | Not-determined | Genome-fragment | NA              | 0     | 0     |
| S4_k141_46680                                | 3511  | No  | NA | 0    | 5 | Not-determined | Genome-fragment | NA              | 0     | 0     |
| S4_k141_11803                                | 1772  | No  | NA | 0    | 2 | Not-determined | Genome-fragment | NA              | 0     | 0     |
| S4_k141_88216                                | 2394  | No  | NA | 0    | 0 | Not-determined | Genome-fragment | NA              | 0     | 0     |
| S4_k141_4655                                 | 1053  | No  | NA | 0    | 0 | Not-determined | Genome-fragment | NA              | 0     | 0     |
| S4_k141_60164                                | 3140  | No  | NA | 0    | 0 | Not-determined | Genome-fragment | NA              | 0     | 0     |
| S4_k141_67575                                | 1405  | No  | NA | 0    | 1 | Not-determined | Genome-fragment | NA              | 0     | 0     |
| S4_k141_109556                               | 3258  | No  | NA | 0    | 0 | Not-determined | Genome-fragment | NA              | 0     | 0     |
| S4_k141_74621                                | 3337  | No  | NA | 0    | 0 | Not-determined | Genome-fragment | NA              | 0     | 0     |
| S4_k141_32714                                | 1108  | No  | NA | 0    | 1 | Not-determined | Genome-fragment | NA              | 0     | 0     |
| S4_k141_4689                                 | 1347  | No  | NA | 0    | 0 | Not-determined | Genome-fragment | NA              | 0     | 0     |
| S4_k141_39378                                | 1025  | No  | NA | 0    | 1 | Not-determined | Genome-fragment | NA              | 0     | 0     |
| S2_k141_44971                                | 6151  | No  | NA | 0    | 5 | Low-quality    | Genome-fragment | NA              | 0.72  | 0     |
| S12_k141_4758                                | 6154  | No  | NA | 5    | 0 | Low-quality    | Genome-fragment | NA              | 18.85 | 0     |
| S4_k141_39399                                | 1063  | No  | NA | 0    | 0 | Not-determined | Genome-fragment | NA              | 0     | 0     |
| S12_k141_94115                               | 6154  | Yes | NA | 4250 | 2 | 1              | Low-quality     | Genome-fragment | 9.83  | 30.94 |
| S4_k141_95343                                | 4011  | No  | NA | 0    | 5 | Not-determined | Genome-fragment | NA              | 0     | 0     |
| S4_k141_32749                                | 1455  | No  | NA | 0    | 1 | Not-determined | Genome-fragment | NA              | 0     | 0     |
| S4_k141_88280                                | 1018  | No  | NA | 0    | 0 | Not-determined | Genome-fragment | NA              | 0     | 0     |
| S4_k141_74662                                | 10207 | No  | NA | 0    | 2 | Not-determined | Genome-fragment | NA              | 0     | 0     |
| S12-final-viral-combined_k141_102344  [full] | 6160  | No  | NA | 3    | 0 | Low-quality    | Genome-fragment | NA              | 10.05 | 0     |
| S4_k141_102075                               | 1291  | No  | NA | 0    | 0 | Not-determined | Genome-fragment | NA              | 0     | 0     |
| S8_k141_139595                               | 6160  | No  | NA | 0    | 1 | Low-quality    | Genome-fragment | NA              | 19    | 0     |
| S4_k141_88315                                | 10755 | No  | NA | 0    | 0 | Not-determined | Genome-fragment | NA              | 0     | 0     |
| S17-final-viral-combined_k141_100598  [full] | 6166  | No  | NA | 0    | 0 | Low-quality    | Genome-fragment | NA              | 7.11  | 0     |
| S4_k141_102113                               | 2305  | No  | NA | 0    | 1 | Not-determined | Genome-fragment | NA              | 0     | 0     |
| S4_k141_52916                                | 1306  | No  | NA | 0    | 3 | Not-determined | Genome-fragment | NA              | 0     | 0     |
| S4_k141_137129                               | 5316  | No  | NA | 0    | 0 | Not-determined | Genome-fragment | NA              | 0     | 0     |
| S4_k141_116027                               | 4525  | No  | NA | 0    | 0 | Not-determined | Genome-fragment | NA              | 0     | 0     |
| S4_k141_109688                               | 1126  | No  | NA | 0    | 0 | Not-determined | Genome-fragment | NA              | 0     | 0     |
| S4_k141_164944                               | 1292  | No  | NA | 0    | 2 | Not-determined | Genome-fragment | NA              | 0     | 0     |
| S4_k141_46793                                | 3372  | No  | NA | 0    | 4 | Not-determined | Genome-fragment | NA              | 0     | 0     |
| S4_k141_109689                               | 7669  | No  | NA | 0    | 3 | Not-determined | Genome-fragment | NA              | 0     | 0     |
| S7-final-viral-combined_k141_173995  [full]  | 6168  | No  | NA | 4    | 0 | Low-quality    | Genome-fragment | NA              | 13.44 | 0     |
| S4_k141_46798                                | 2695  | No  | NA | 0    | 0 | Not-determined | Genome-fragment | NA              | 0     | 0     |
| S4_k141_4805                                 | 1078  | No  | NA | 0    | 1 | Not-determined | Genome-fragment | NA              | 0     | 0     |
| S4_k141_102175                               | 1630  | No  | NA | 0    | 0 | Not-determined | Genome-fragment | NA              | 0     | 0     |
| S4_k141_115336                               | 1075  | No  | NA | 0    | 0 | Not-determined | Genome-fragment | NA              | 0     | 0     |
| S4_k141_109706                               | 1961  | No  | NA | 0    | 2 | Not-determined | Genome-fragment | NA              | 0     | 0     |
| S4_k141_164975                               | 1416  | No  | NA | 0    | 3 | Not-determined | Genome-fragment | NA              | 0     | 0     |
| S4_k141_164979                               | 1121  | No  | NA | 0    | 1 | Not-determined | Genome-fragment | NA              | 0     | 0     |
| S17-final-viral-combined_k141_224633  [full] | 6172  | No  | NA | 1    | 2 | Low-quality    | Genome-fragment | NA              | 5.62  | 0     |
| S4_k141_52992                                | 1669  | No  | NA | 0    | 2 | Not-determined | Genome-fragment | NA              | 0     | 0     |
| S4_k141_151011                               | 1059  | No  | NA | 0    | 1 | Not-determined | Genome-fragment | NA              | 0     | 0     |
| S4_k141_39492                                | 1212  | No  | NA | 0    | 0 | Not-determined | Genome-fragment | NA              | 0     | 0     |
| S7-final-viral-combined_k141_166416  [full]  | 6174  | No  | NA | 6    | 1 | Low-quality    | Genome-fragment | NA              | 9.68  | 0     |
| S4_k141_144433                               | 1071  | No  | NA | 0    | 0 | Not-determined | Genome-fragment | NA              | 0     | 0     |
| S4_k141_74791                                | 1325  | No  | NA | 0    | 0 | Not-determined | Genome-fragment | NA              | 0     | 0     |
| S4_k141_18108                                | 1046  | No  | NA | 0    | 1 | Not-determined | Genome-fragment | NA              | 0     | 0     |
| S4_k141_95497                                | 1274  | No  | NA | 0    | 0 | Not-determined | Genome-fragment | NA              | 0     | 0     |
| S4_k141_158313                               | 3665  | No  | NA | 0    | 3 | Not-determined | Genome-fragment | NA              | 0     | 0     |
| S4_k141_11967                                | 3724  | No  | NA | 0    | 2 | Not-determined | Genome-fragment | NA              | 0     | 0     |
| S4_k141_18125                                | 3083  | No  | NA | 0    | 2 | Not            |                 |                 |       |       |



|                                            |       |     |    |      |   |                |                 |                 |       |
|--------------------------------------------|-------|-----|----|------|---|----------------|-----------------|-----------------|-------|
| S4_k141_165218                             | 1010  | No  | NA | 0    | 0 | Not-determined | Genome-fragment | NA              | 0     |
| S4_k141_116271                             | 1112  | No  | NA | 0    | 1 | Not-determined | Genome-fragment | NA              | 0     |
| S4_k141_158514                             | 1032  | No  | NA | 0    | 0 | Not-determined | Genome-fragment | NA              | 0     |
| S4_k141_144631                             | 2841  | No  | NA | 0    | 0 | Not-determined | Genome-fragment | NA              | 0     |
| S4_k141_122783                             | 1324  | No  | NA | 0    | 4 | Not-determined | Genome-fragment | NA              | 0     |
| S4_k141_144632                             | 1185  | No  | NA | 0    | 1 | Not-determined | Genome-fragment | NA              | 0     |
| S4_k141_33026                              | 1575  | No  | NA | 0    | 1 | Not-determined | Genome-fragment | NA              | 0     |
| S4_k141_67883                              | 1214  | No  | NA | 0    | 0 | Not-determined | Genome-fragment | NA              | 0     |
| S8-final-viral-combined_k141_69377  full   | 6182  | No  | NA | 5    | 0 | Low-quality    | Genome-fragment | NA              | 14.57 |
| S4_k141_158580                             | 1000  | No  | NA | 0    | 1 | Not-determined | Genome-fragment | NA              | 0     |
| S8-final-viral-combined_k141_22007  full   | 6183  | No  | NA | 1    | 0 | Low-quality    | Genome-fragment | NA              | 18.51 |
| S4-final-viral-combined_k141_124930  full  | 6184  | No  | NA | 1    | 0 | Low-quality    | Genome-fragment | NA              | 15.39 |
| S4_k141_67935                              | 1305  | No  | NA | 0    | 1 | Not-determined | Genome-fragment | NA              | 0     |
| S4_k141_25941                              | 1308  | No  | NA | 0    | 1 | Not-determined | Genome-fragment | NA              | 0     |
| S4_k141_29665                              | 1078  | No  | NA | 0    | 0 | Not-determined | Genome-fragment | NA              | 0     |
| S4_k141_144691                             | 1840  | No  | NA | 0    | 1 | Not-determined | Genome-fragment | NA              | 0     |
| S4_k141_102481                             | 1084  | No  | NA | 0    | 2 | Not-determined | Genome-fragment | NA              | 0     |
| S11-final-viral-combined_k141_212492  full | 6192  | No  | NA | 3    | 0 | Low-quality    | Genome-fragment | NA              | 10.94 |
| S4_k141_18270                              | 2229  | No  | NA | 0    | 2 | Not-determined | Genome-fragment | NA              | 0     |
| S5-final-viral-combined_k141_46240  full   | 6192  | No  | NA | 0    | 2 | Low-quality    | Genome-fragment | NA              | 2.53  |
| S4_k141_82157                              | 1520  | No  | NA | 0    | 1 | Not-determined | Genome-fragment | NA              | 0     |
| S4_k141_74983                              | 4300  | No  | NA | 0    | 4 | Not-determined | Genome-fragment | NA              | 0     |
| S4_k141_5006                               | 1244  | No  | NA | 0    | 0 | Not-determined | Genome-fragment | NA              | 0     |
| S4_k141_12170                              | 1025  | No  | NA | 0    | 0 | Not-determined | Genome-fragment | NA              | 0     |
| S7-final-viral-combined_k141_21342  full   | 6195  | No  | NA | 0    | 5 | Low-quality    | Genome-fragment | NA              | 2.84  |
| S4_k141_18375                              | 1159  | No  | NA | 0    | 2 | Not-determined | Genome-fragment | NA              | 0     |
| S4_k141_5018                               | 1176  | No  | NA | 0    | 1 | Not-determined | Genome-fragment | NA              | 0     |
| S4_k141_122859                             | 1192  | No  | NA | 0    | 0 | Not-determined | Genome-fragment | NA              | 0     |
| S4_k141_18387                              | 1327  | No  | NA | 0    | 1 | Not-determined | Genome-fragment | NA              | 0     |
| S4_k141_122873                             | 1578  | No  | NA | 0    | 1 | Not-determined | Genome-fragment | NA              | 0     |
| S4_k141_60487                              | 3143  | No  | NA | 0    | 1 | Not-determined | Genome-fragment | NA              | 0     |
| S4_k141_144732                             | 1017  | No  | NA | 0    | 1 | Not-determined | Genome-fragment | NA              | 0     |
| S1-final-viral-combined_k141_169159  full  | 6196  | No  | NA | 0    | 0 | Low-quality    | Genome-fragment | NA              | 8.41  |
| S4_k141_18421                              | 1820  | No  | NA | 0    | 2 | Not-determined | Genome-fragment | NA              | 0     |
| S8_k141_84139                              | 6197  | No  | NA | 0    | 0 | Low-quality    | Genome-fragment | NA              | 10.27 |
| S1-final-viral-combined_k141_84831  full   | 6199  | No  | NA | 8    | 1 | Low-quality    | Genome-fragment | NA              | 11.33 |
| S4_k141_88654                              | 1175  | No  | NA | 0    | 1 | Not-determined | Genome-fragment | NA              | 0     |
| S4_k141_67968                              | 1118  | No  | NA | 0    | 1 | Not-determined | Genome-fragment | NA              | 0     |
| S4_k141_47074                              | 1320  | No  | NA | 0    | 1 | Not-determined | Genome-fragment | NA              | 0     |
| S4_k141_67972                              | 1563  | No  | NA | 0    | 2 | Not-determined | Genome-fragment | NA              | 0     |
| S4-final-viral-combined_k141_188318  full  | 6199  | No  | NA | 0    | 5 | Low-quality    | Genome-fragment | NA              | 3.39  |
| S4_k141_47089                              | 2851  | No  | NA | 0    | 5 | Not-determined | Genome-fragment | NA              | 0     |
| S4_k141_60535                              | 1326  | No  | NA | 0    | 1 | Not-determined | Genome-fragment | NA              | 0     |
| S1-final-viral-combined_k141_265395  full  | 6203  | Yes | NA | 3807 | 2 | 2              | Low-quality     | Genome-fragment | 8.61  |
| S1-final-viral-combined_k141_305629  full  | 6203  | No  | NA | 0    | 0 | Low-quality    | Genome-fragment | NA              | 0     |
| S7_k141_11245                              | 6204  | No  | NA | 1    | 0 | Low-quality    | Genome-fragment | NA              | 7.52  |
| S2-final-viral-combined_k141_142361  full  | 6204  | No  | NA | 1    | 0 | Low-quality    | Genome-fragment | NA              | 1.6   |
| S4_k141_68028                              | 1008  | No  | NA | 0    | 2 | Not-determined | Genome-fragment | NA              | 0     |
| S4_k141_122224                             | 2515  | No  | NA | 0    | 2 | Not-determined | Genome-fragment | NA              | 0     |
| S8-final-viral-combined_k141_168430  full  | 6206  | No  | NA | 0    | 1 | Low-quality    | Genome-fragment | NA              | 15.89 |
| S4_k141_116477                             | 1072  | No  | NA | 0    | 2 | Not-determined | Genome-fragment | NA              | 0     |
| S4_k141_60589                              | 1976  | No  | NA | 0    | 2 | Not-determined | Genome-fragment | NA              | 0     |
| S4_k141_39803                              | 1044  | No  | NA | 0    | 1 | Not-determined | Genome-fragment | NA              | 0     |
| S4_k141_33151                              | 1101  | No  | NA | 0    | 1 | Not-determined | Genome-fragment | NA              | 0     |
| S4_k141_33153                              | 1195  | No  | NA | 0    | 1 | Not-determined | Genome-fragment | NA              | 0     |
| S1-final-viral-combined_k141_23765  full   | 6207  | No  | NA | 0    | 0 | Low-quality    | Genome-fragment | NA              | 10.12 |
| S4_k141_116508                             | 3128  | No  | NA | 0    | 1 | Not-determined | Genome-fragment | NA              | 0     |
| S7-final-viral-combined_k141_111650  full  | 6208  | No  | NA | 1    | 0 | Low-quality    | Genome-fragment | NA              | 12.69 |
| S4_k141_53361                              | 1495  | No  | NA | 0    | 0 | Not-determined | Genome-fragment | NA              | 0     |
| S4_k141_47130                              | 1837  | No  | NA | 0    | 1 | Not-determined | Genome-fragment | NA              | 0     |
| S4_k141_158799                             | 3012  | No  | NA | 0    | 2 | Not-determined | Genome-fragment | NA              | 0     |
| S4_k141_12209                              | 3594  | No  | NA | 0    | 4 | Not-determined | Genome-fragment | NA              | 0     |
| S12_k141_214414                            | 6210  | No  | NA | 0    | 1 | Low-quality    | Genome-fragment | NA              | 14.71 |
| S4_k141_47179                              | 1166  | No  | NA | 0    | 0 | Not-determined | Genome-fragment | NA              | 0     |
| S8-final-viral-combined_k141_254069  full  | 6213  | No  | NA | 0    | 1 | Low-quality    | Genome-fragment | NA              | 21.66 |
| S12-final-viral-combined_k141_352251  full | 6216  | No  | NA | 1    | 0 | Low-quality    | Genome-fragment | NA              | 4.26  |
| S8_k141_217079                             | 6219  | No  | NA | 0    | 0 | Low-quality    | Genome-fragment | NA              | 6.5   |
| S4_k141_18536                              | 1498  | No  | NA | 0    | 0 | Not-determined | Genome-fragment | NA              | 0     |
| S4_k141_158832                             | 2162  | No  | NA | 0    | 0 | Not-determined | Genome-fragment | NA              | 0     |
| S4_k141_82266                              | 1008  | No  | NA | 0    | 0 | Not-determined | Genome-fragment | NA              | 0     |
| S4_k141_110212                             | 1956  | No  | NA | 0    | 1 | Not-determined | Genome-fragment | NA              | 0     |
| S4_k141_5101                               | 1823  | No  | NA | 0    | 1 | Not-determined | Genome-fragment | NA              | 0     |
| S4_k141_33251                              | 1045  | No  | NA | 0    | 2 | Not-determined | Genome-fragment | NA              | 0     |
| S4_k141_12360                              | 1393  | No  | NA | 0    | 1 | Not-determined | Genome-fragment | NA              | 0     |
| S4_k141_82285                              | 1000  | No  | NA | 0    | 1 | Not-determined | Genome-fragment | NA              | 0     |
| S2_k141_106041                             | 6220  | No  | NA | 3    | 0 | Low-quality    | Genome-fragment | NA              | 14.63 |
| S4_k141_53432                              | 1447  | No  | NA | 0    | 1 | Not-determined | Genome-fragment | NA              | 0     |
| S12-final-viral-combined_k141_135434  full | 6224  | Yes | NA | 3215 | 1 | 3              | Low-quality     | Genome-fragment | 0.216 |
| S4_k141_18590                              | 3105  | No  | NA | 0    | 3 | Not-determined | Genome-fragment | NA              | 48.35 |
| S4_k141_75207                              | 1131  | No  | NA | 0    | 2 | Not-determined | Genome-fragment | NA              | 0     |
| S2-final-viral-combined_k141_8893  full    | 6227  | No  | NA | 3    | 0 | Low-quality    | Genome-fragment | NA              | 9.7   |
| S4_k141_185096                             | 1325  | No  | NA | 0    | 1 | Not-determined | Genome-fragment | NA              | 0     |
| S4_k141_75222                              | 1144  | No  | NA | 0    | 0 | Not-determined | Genome-fragment | NA              | 0     |
| S4_k141_123068                             | 2224  | No  | NA | 0    | 2 | Not-determined | Genome-fragment | NA              | 0     |
| S4_k141_47252                              | 1249  | No  | NA | 0    | 2 | Not-determined | Genome-fragment | NA              | 2.96  |
| S4_k141_39961                              | 1212  | No  | NA | 0    | 0 | Not-determined | Genome-fragment | NA              | 0     |
| S4_k141_123079                             | 1516  | No  | NA | 0    | 1 | Not-determined | Genome-fragment | NA              | 0     |
| S4_k141_137537                             | 1027  | No  | NA | 0    | 0 | Not-determined | Genome-fragment | NA              | 0     |
| S4_k141_110071                             | 1540  | No  | NA | 0    | 0 | Not-determined | Genome-fragment | NA              | 0     |
| S2-final-viral-combined_k141_145713  full  | 6228  | No  | NA | 4    | 0 | Low-quality    | Genome-fragment | NA              | 10.25 |
| S4_k141_26194                              | 3842  | No  | NA | 0    | 2 | Not-determined | Genome-fragment | NA              | 11.7  |
| S2-final-viral-combined_k141_29534  full   | 6228  | No  | NA | 6    | 0 | Low-quality    | Genome-fragment | NA              | 0     |
| S4_k141_39982                              | 16769 | No  | NA | 0    | 4 | Not-determined | Genome-fragment | NA              | 0     |
| S4_k141_60707                              | 1477  | No  | NA | 0    | 1 | Not-determined | Genome-fragment | NA              | 0     |
| S12-final-viral-combined_k141_65836  full  | 6229  | Yes | NA | 3213 | 1 | 1              | Low-quality     | Genome-fragment | 3.51  |
| S4_k141_75278                              | 1557  | No  | NA | 0    | 1 | Not-determined | Genome-fragment | NA              | 48.42 |
| S17-k141_211653                            | 6231  | No  | NA | 2    | 0 | Low-quality    | Genome-fragment | NA              | 13.04 |
| S8-final-viral-combined_k141_68979  full   | 6232  | No  | NA | 1    | 0 | Low-quality    | Genome-fragment | NA              | 6.84  |
| S4_k141_123128                             | 1016  | No  | NA | 0    | 1 | Not-determined | Genome-fragment | NA              | 0     |
| S4_k141_47300                              | 5067  | No  | NA | 0    | 2 | Not-determined | Genome-fragment | NA              | 0     |
| S4_k141_75284                              | 1438  | No  | NA | 0    | 1 | Not-determined | Genome-fragment | NA              | 0     |
| S4_k141_116625                             | 1363  | No  | NA | 0    | 2 | Not-determined | Genome-fragment | NA              | 0     |
| S4_k141_82321                              | 7062  | No  | NA | 0    | 0 | Not-determined | Genome-fragment | NA              | 0     |
| S4_k141_116632                             | 1353  | No  | NA | 0    | 0 | Not-determined | Genome-fragment | NA              | 0     |
| S4_k141_5217                               | 1380  | No  | NA | 0    | 2 | Not-determined | Genome-fragment | NA              | 0     |
| S4_k141_26248                              | 1138  | No  | NA | 0    | 1 | Not-determined | Genome-fragment | NA              | 0     |
| S4_k141_82347                              | 1663  | No  | NA | 0    | 0 | Not-determined | Genome-fragment | NA              | 0     |
| S4_k141_137620                             | 1374  | No  | NA | 0    | 1 | Not-determined | Genome-fragment | NA              | 0     |
| S4_k141_158988                             | 1016  | No  | NA | 0    | 2 | Not-determined | Genome-fragment | NA              | 0     |
| S4_k141_110348                             | 3786  | No  | NA | 0    | 4 | Not-determined | Genome-fragment | NA              | 0     |
| S8-final-viral-combined_k141_2351  full    | 6232  | No  | NA | 0    | 4 | Low-quality    | Genome-fragment | NA              | 12.09 |
| S11-final-viral-combined_k141_232889  full | 6235  | No  | NA | 0    | 0 | Low-quality    | Genome-fragment | NA              | 0     |
| S12-final-viral-combined_k141_360499  full | 6235  | No  | NA | 2    | 0 | Low-quality    | Genome-fragment | NA              | 9.83  |
| S4_k141_137635                             | 1339  | No  | NA | 0    | 2 | Not-determined | Genome-fragment | NA              | 0     |
| S4_k141_47258                              | 4914  | No  | NA | 0    | 1 | Not-determined | Genome-fragment | NA              | 0     |
| S4_k141_75297                              | 1312  | No  | NA | 0    | 1 | Not-determined | Genome-fragment | NA              | 0     |
| S8-final-viral-combined_k141_110899  full  | 6235  | Yes | NA | 5197 | 1 | 1              | Low-quality     | Genome-fragment | 11.09 |
| S1-final-viral-combined_k141_30822  full   | 6237  | No  | NA | 0    | 4 | Low-quality    | Genome-fragment | NA              | 3.23  |
| S5-final-viral-combined_k141_139231  full  | 6240  | No  | NA | 2    | 1 | Low-quality    | Genome-fragment | NA              | 4.15  |
| S4_k141_137663                             | 2437  | No  | NA | 0    | 2 | Not-determined | Genome-fragment | NA              | 0     |
| S4_k141_145059                             | 3656  | No  | NA | 0    | 1 | Not-determined | Genome-fragment | NA              | 0     |
| S4_k141_235394                             | 1063  | No  | NA | 0    | 0 | Not-determined | Genome-fragment | NA              | 0     |
| S4_k141_145062                             | 3524  | No  | NA | 0    | 3 | Not-determined | Genome-fragment | NA              | 0     |
| S8_k141_86532                              | 6243  | No  | NA | 0    | 0 | Low-quality    | Genome-fragment | NA              | 7.2   |
| S11_k141_169652                            | 6245  | No  | NA | 3    | 0 | Low-quality    | Genome-fragment | NA              | 7.54  |
| S4_k141_110422                             | 3314  | No  | NA | 0    | 2 | Not-determined | Genome-fragment | NA              | 0     |
| S2-final-viral-combined_k141_421  full     | 6245  | No  | NA | 0    | 5 | Low-quality    | Genome-fragment | NA              | 2.95  |
| S4_k141_82435                              | 1556  | No  | NA | 0    | 0 | Not-determined | Genome-fragment | NA              | 10    |
| S4_k141_53603                              | 3962  | No  | NA | 0    | 1 | Not-determined | Genome-fragment | NA              | 0     |
| S2-final-viral-combined_k141_18352  full   | 6245  | No  | NA | 0    | 0 | Low-quality    | Genome-fragment | NA              | 11    |
| S4_k141_53606                              | 1000  | No  | NA | 0    | 0 | Not-determined | Genome-fragment | NA              | 0     |
| S4_k141_60863                              | 1014  | No  | NA | 0    | 1 | Not-determined | Genome-fragment | NA              | 0     |
| S4_k141_40144                              | 1014  | No  | NA | 0    | 1 | Not-determined | Genome-fragment | NA              | 0     |
| S11-final-viral-combined_k141_270129  full | 6249  | Yes | NA | 1950 | 1 | 3              | Low-quality     | Genome-fragment | 0.298 |
| S4_k141_18792                              | 1978  | No  | NA | 0    | 1 | Not-determined | Genome-fragment | NA              | 68.8  |
| S4_k141_18793                              | 1319  | No  | NA | 0    | 0 | Not-determined | Genome-fragment | NA              | 0     |
| S4_k141_75346                              | 4195  | No  | NA | 0    | 1 | Not-determined | Genome-fragment | NA              | 0     |
| S4_k141_89010                              | 6222  | No  | NA | 0    | 5 | Not-determined | Genome-fragment | NA              | 0     |
| S4_k141_33456                              | 1321  | No  | NA | 0    | 1 | Not-determined | Genome-fragment | NA              | 0     |
| S1-final-viral-combined_k141_145309  full  | 6249  | No  | NA | 6    | 0 | Low-quality    | Genome-fragment | NA              | 10.21 |
| S4_k141_130704                             | 1339  | No  | NA | 0    | 0 | Not-determined | Genome-fragment | NA              | 0     |
| S4_k141_131270                             | 1388  | No  | NA | 0    | 0 | Not-determined | Genome-fragment | NA              | 0     |
| S4_k141_68351                              | 3511  | No  | NA | 0    | 4 | Not-determined | Genome-fragment | NA              | 0     |
| S1-final-viral-combined_k141_257934  full  | 6251  | No  | NA | 3    | 0 | Low-quality    | Genome-fragment | NA              | 9.61  |
| S4_k141_130741                             | 4015  | No  | NA | 0    | 4 | Not-determined | Genome-fragment | NA              | 0     |



|                                            |       |     |      |   |   |                |                 |       |       |
|--------------------------------------------|-------|-----|------|---|---|----------------|-----------------|-------|-------|
| S4_k141_33621                              | 1632  | No  | NA   | 0 | 0 | Not-determined | Genome-fragment | NA    | 0     |
| S4_k141_145420                             | 3361  | No  | NA   | 0 | 1 | Not-determined | Genome-fragment | NA    | 0     |
| S4_k141_33626                              | 1654  | No  | NA   | 0 | 1 | Not-determined | Genome-fragment | NA    | 0     |
| S4_k141_75496                              | 1490  | No  | NA   | 0 | 2 | Not-determined | Genome-fragment | NA    | 0     |
| S4_k141_26484                              | 3352  | No  | NA   | 0 | 1 | Not-determined | Genome-fragment | NA    | 0     |
| S4_k141_110610                             | 3112  | No  | NA   | 0 | 2 | Not-determined | Genome-fragment | NA    | 0     |
| S4_k141_82695                              | 1062  | No  | NA   | 0 | 0 | Not-determined | Genome-fragment | NA    | 0     |
| S4_k141_75502                              | 2594  | No  | NA   | 0 | 3 | Not-determined | Genome-fragment | NA    | 0     |
| S4_k141_137854                             | 2268  | No  | NA   | 0 | 1 | Not-determined | Genome-fragment | NA    | 0     |
| S4_k141_75515                              | 1363  | No  | NA   | 0 | 0 | Not-determined | Genome-fragment | NA    | 0     |
| S11_k141_26726                             | 6265  | No  | NA   | 0 | 1 | Low-quality    | Genome-fragment | 10.46 | 0     |
| S4_k141_102035                             | 1185  | No  | NA   | 0 | 2 | Not-determined | Genome-fragment | NA    | 0     |
| S4_k141_61055                              | 5062  | No  | NA   | 0 | 3 | Not-determined | Genome-fragment | NA    | 0     |
| S4_k141_123471                             | 1888  | No  | NA   | 0 | 0 | Not-determined | Genome-fragment | NA    | 0     |
| S4_k141_123479                             | 2626  | No  | NA   | 0 | 3 | Not-determined | Genome-fragment | NA    | 0     |
| S4_k141_40371                              | 3455  | No  | NA   | 0 | 2 | Not-determined | Genome-fragment | NA    | 0     |
| S4_k141_40385                              | 1678  | No  | NA   | 0 | 2 | Not-determined | Genome-fragment | NA    | 0     |
| S8_k141_105959                             | 6268  | No  | NA   | 1 | 0 | Low-quality    | Genome-fragment | 2.93  | 0     |
| S12-final-viral-combined_k141_52857  full  | 6270  | No  | NA   | 3 | 0 | Low-quality    | Genome-fragment | 14.19 | 0     |
| S4_k141_137910                             | 3376  | No  | NA   | 0 | 2 | Not-determined | Genome-fragment | NA    | 0     |
| S4_k141_130868                             | 1010  | No  | NA   | 0 | 0 | Not-determined | Genome-fragment | NA    | 0     |
| S4_k141_137915                             | 2123  | No  | NA   | 0 | 3 | Not-determined | Genome-fragment | NA    | 0     |
| S4_k141_103005                             | 1198  | No  | NA   | 0 | 0 | Not-determined | Genome-fragment | NA    | 0     |
| S4_k141_89283                              | 1137  | No  | NA   | 0 | 1 | Not-determined | Genome-fragment | NA    | 0     |
| S4_k141_19049                              | 1169  | No  | NA   | 0 | 2 | Not-determined | Genome-fragment | NA    | 0     |
| S4_k141_130904                             | 1093  | No  | NA   | 0 | 1 | Not-determined | Genome-fragment | NA    | 0     |
| S4_k141_145348                             | 1213  | No  | NA   | 0 | 1 | Not-determined | Genome-fragment | NA    | 0     |
| S4_k141_53796                              | 1287  | No  | NA   | 0 | 0 | Not-determined | Genome-fragment | NA    | 0     |
| S4_k141_68511                              | 1659  | No  | NA   | 0 | 0 | Not-determined | Genome-fragment | NA    | 0     |
| S7_k141_138092                             | 6273  | No  | NA   | 6 | 0 | Low-quality    | Genome-fragment | 11.4  | 0     |
| S4_k141_116997                             | 2130  | No  | NA   | 0 | 1 | Not-determined | Genome-fragment | NA    | 0     |
| S12-final-viral-combined_k141_194649  full | 6274  | No  | NA   | 0 | 3 | Low-quality    | Genome-fragment | 1.79  | 0     |
| S4_k141_53816                              | 1802  | No  | NA   | 0 | 1 | Not-determined | Genome-fragment | NA    | 0     |
| S4_k141_53817                              | 1130  | No  | NA   | 0 | 1 | Not-determined | Genome-fragment | NA    | 0     |
| S4_k141_5638                               | 1162  | No  | NA   | 0 | 1 | Not-determined | Genome-fragment | NA    | 0     |
| S4_k141_5642                               | 1104  | No  | NA   | 0 | 0 | Not-determined | Genome-fragment | NA    | 0     |
| S4_k141_159270                             | 1076  | No  | NA   | 0 | 2 | Not-determined | Genome-fragment | NA    | 0     |
| S4_k141_40464                              | 2000  | No  | NA   | 0 | 1 | Not-determined | Genome-fragment | NA    | 0     |
| S4_k141_48124                              | 6278  | No  | NA   | 4 | 0 | Low-quality    | Genome-fragment | 13.44 | 0     |
| S4_k141_68577                              | 2576  | No  | NA   | 0 | 1 | Not-determined | Genome-fragment | NA    | 0     |
| S4_k141_40473                              | 1958  | No  | NA   | 0 | 1 | Not-determined | Genome-fragment | NA    | 0     |
| S4_k141_12741                              | 1687  | No  | NA   | 0 | 0 | Not-determined | Genome-fragment | NA    | 0     |
| S4_k141_68589                              | 1308  | No  | NA   | 0 | 1 | Not-determined | Genome-fragment | NA    | 0     |
| S4_k141_151902                             | 14445 | No  | NA   | 0 | 6 | Not-determined | Genome-fragment | NA    | 0     |
| S4_k141_53831                              | 1482  | No  | NA   | 0 | 1 | Not-determined | Genome-fragment | NA    | 0     |
| S4_k141_68609                              | 1288  | No  | NA   | 0 | 1 | Not-determined | Genome-fragment | NA    | 0     |
| S4_k141_89372                              | 1902  | No  | NA   | 0 | 1 | Not-determined | Genome-fragment | NA    | 0     |
| S4_k141_19150                              | 3059  | No  | NA   | 0 | 1 | Not-determined | Genome-fragment | NA    | 0     |
| S4_k141_47700                              | 5015  | No  | NA   | 0 | 1 | Not-determined | Genome-fragment | NA    | 0     |
| S6_k141_36247                              | 6285  | No  | NA   | 1 | 0 | Low-quality    | Genome-fragment | 3.36  | 0     |
| S4_k141_137995                             | 1269  | No  | NA   | 0 | 1 | Not-determined | Genome-fragment | NA    | 0     |
| S4_k141_47743                              | 5524  | No  | NA   | 0 | 3 | Not-determined | Genome-fragment | NA    | 0     |
| S4_k141_19211                              | 3511  | No  | NA   | 0 | 3 | Not-determined | Genome-fragment | NA    | 0     |
| S4_k141_165741                             | 1233  | No  | NA   | 0 | 1 | Not-determined | Genome-fragment | NA    | 0     |
| S4_k141_117125                             | 1021  | No  | NA   | 0 | 1 | Not-determined | Genome-fragment | NA    | 0     |
| S4_k141_19125                              | 1139  | No  | NA   | 0 | 0 | Not-determined | Genome-fragment | NA    | 0     |
| S4_k141_12882                              | 1023  | No  | NA   | 0 | 1 | Not-determined | Genome-fragment | NA    | 0     |
| S4_k141_131041                             | 1411  | No  | NA   | 0 | 1 | Not-determined | Genome-fragment | NA    | 0     |
| S4_k141_53931                              | 1161  | No  | NA   | 0 | 1 | Not-determined | Genome-fragment | NA    | 0     |
| S4_k141_165770                             | 1122  | No  | NA   | 0 | 1 | Not-determined | Genome-fragment | NA    | 0     |
| S8-final-viral-combined_k141_50732  full   | 6286  | No  | NA   | 0 | 3 | Low-quality    | Genome-fragment | 1.02  | 0     |
| S4_k141_5749                               | 1542  | No  | NA   | 0 | 0 | Not-determined | Genome-fragment | NA    | 0     |
| S4_k141_145571                             | 1935  | No  | NA   | 0 | 0 | Not-determined | Genome-fragment | NA    | 0     |
| S4_k141_33886                              | 3370  | No  | NA   | 0 | 4 | Not-determined | Genome-fragment | NA    | 0     |
| S4_k141_68769                              | 3201  | No  | NA   | 3 | 1 | Not-determined | Genome-fragment | NA    | 0     |
| S4_k141_159474                             | 1258  | No  | NA   | 0 | 1 | Not-determined | Genome-fragment | NA    | 0     |
| S4_k141_61303                              | 1398  | No  | NA   | 0 | 1 | Not-determined | Genome-fragment | NA    | 0     |
| S4_k141_40611                              | 4148  | No  | NA   | 0 | 1 | Not-determined | Genome-fragment | NA    | 0     |
| S4_k141_61311                              | 1147  | No  | NA   | 0 | 1 | Not-determined | Genome-fragment | NA    | 0     |
| S4_k141_165831                             | 1134  | No  | NA   | 0 | 0 | Not-determined | Genome-fragment | NA    | 0     |
| S11-final-viral-combined_k141_166522  full | 6287  | No  | NA   | 1 | 0 | Low-quality    | Genome-fragment | 10.9  | 0     |
| S4_k141_83071                              | 3952  | No  | NA   | 0 | 1 | Not-determined | Genome-fragment | NA    | 0     |
| S4_k141_12959                              | 1187  | No  | NA   | 0 | 0 | Not-determined | Genome-fragment | NA    | 0     |
| S4_k141_159510                             | 1257  | No  | NA   | 0 | 1 | Not-determined | Genome-fragment | NA    | 0     |
| S4_k141_75834                              | 1014  | No  | NA   | 0 | 1 | Not-determined | Genome-fragment | NA    | 0     |
| S4_k141_165848                             | 1034  | No  | NA   | 0 | 1 | Not-determined | Genome-fragment | NA    | 0     |
| S4_k141_12974                              | 3461  | No  | NA   | 0 | 1 | Not-determined | Genome-fragment | NA    | 0     |
| S4_k141_103259                             | 1096  | No  | NA   | 0 | 0 | Not-determined | Genome-fragment | NA    | 0     |
| S4_k141_36651                              | 1213  | No  | NA   | 0 | 1 | Not-determined | Genome-fragment | NA    | 0     |
| S4_k141_159537                             | 4333  | No  | NA   | 0 | 0 | Not-determined | Genome-fragment | NA    | 0     |
| S11_k141_149316                            | 6287  | No  | NA   | 0 | 2 | Low-quality    | Genome-fragment | 1.99  | 0     |
| S8_k141_779                                | 6288  | No  | NA   | 0 | 2 | Low-quality    | Genome-fragment | 12.1  | 0     |
| S4_k141_138179                             | 4021  | No  | NA   | 0 | 2 | Not-determined | Genome-fragment | NA    | 0     |
| S1_k141_251166                             | 6290  | No  | NA   | 6 | 0 | Low-quality    | Genome-fragment | 15.61 | 0     |
| S4_k141_75870                              | 1789  | No  | NA   | 0 | 0 | Not-determined | Genome-fragment | NA    | 0     |
| S7_k141_39180                              | 6292  | No  | NA   | 2 | 0 | Low-quality    | Genome-fragment | 15.45 | 0     |
| S4_k141_96664                              | 5358  | No  | NA   | 0 | 3 | Not-determined | Genome-fragment | NA    | 0     |
| S4_k141_152117                             | 2335  | No  | NA   | 0 | 2 | Not-determined | Genome-fragment | NA    | 0     |
| S4_k141_75880                              | 1089  | No  | NA   | 0 | 2 | Not-determined | Genome-fragment | NA    | 0     |
| S4_k141_165893                             | 3617  | No  | NA   | 0 | 2 | Not-determined | Genome-fragment | NA    | 0     |
| S4_k141_131156                             | 4654  | No  | NA   | 0 | 1 | Not-determined | Genome-fragment | NA    | 0     |
| S4_k141_36681                              | 2315  | No  | NA   | 0 | 3 | Not-determined | Genome-fragment | NA    | 0     |
| S4_k141_5887                               | 1207  | No  | NA   | 0 | 0 | Not-determined | Genome-fragment | NA    | 0     |
| S7-final-viral-combined_k141_113695  full  | 6294  | No  | NA   | 1 | 0 | Low-quality    | Genome-fragment | 4.53  | 0     |
| S4_k141_138231                             | 1168  | No  | NA   | 0 | 0 | Not-determined | Genome-fragment | NA    | 0     |
| S4_k141_138239                             | 1020  | No  | NA   | 0 | 1 | Not-determined | Genome-fragment | NA    | 0     |
| S4_k141_165914                             | 1090  | No  | NA   | 0 | 1 | Not-determined | Genome-fragment | NA    | 0     |
| S4_k141_111034                             | 1757  | No  | NA   | 0 | 2 | Not-determined | Genome-fragment | NA    | 0     |
| S11-final-viral-combined_k141_196664  full | 6297  | No  | NA   | 5 | 0 | Low-quality    | Genome-fragment | 14.03 | 0     |
| S4_k141_152183                             | 2596  | No  | NA   | 0 | 0 | Not-determined | Genome-fragment | NA    | 0     |
| S4_k141_152191                             | 1575  | No  | NA   | 0 | 0 | Not-determined | Genome-fragment | NA    | 0     |
| S4_k141_13050                              | 2055  | No  | NA   | 0 | 0 | Not-determined | Genome-fragment | NA    | 0     |
| S4_k141_26763                              | 1219  | No  | NA   | 0 | 1 | Not-determined | Genome-fragment | NA    | 0     |
| S5-final-viral-combined_k141_55606  full   | 6302  | No  | NA   | 5 | 0 | Low-quality    | Genome-fragment | 14.99 | 0     |
| S12-final-viral-combined_k141_397025  full | 6302  | No  | NA   | 0 | 7 | Low-quality    | Genome-fragment | 2.91  | 0     |
| S4_k141_165949                             | 1082  | No  | NA   | 0 | 2 | Not-determined | Genome-fragment | NA    | 0     |
| S4_k141_5934                               | 1134  | No  | NA   | 0 | 0 | Not-determined | Genome-fragment | NA    | 0     |
| S6-final-viral-combined_k141_86986  full   | 6307  | No  | NA   | 3 | 0 | Low-quality    | Genome-fragment | 16.2  | 0     |
| S4_k141_145830                             | 1424  | No  | NA   | 0 | 0 | Not-determined | Genome-fragment | NA    | 0     |
| S4_k141_68951                              | 1025  | No  | NA   | 0 | 1 | Not-determined | Genome-fragment | NA    | 0     |
| S4_k141_68955                              | 1715  | No  | NA   | 0 | 2 | Not-determined | Genome-fragment | NA    | 0     |
| S4_k141_48006                              | 1120  | No  | NA   | 0 | 0 | Not-determined | Genome-fragment | NA    | 0     |
| S4_k141_54174                              | 1012  | No  | NA   | 0 | 0 | Not-determined | Genome-fragment | NA    | 0     |
| S11-final-viral-combined_k141_214104  full | 6308  | No  | NA   | 0 | 0 | Low-quality    | Genome-fragment | 7.66  | 0     |
| S4_k141_24077                              | 1179  | No  | NA   | 0 | 1 | Not-determined | Genome-fragment | NA    | 0     |
| S11-final-viral-combined_k141_284700  full | 6309  | No  | NA   | 4 | 0 | Low-quality    | Genome-fragment | 7     | 0     |
| S4_k141_48045                              | 1051  | No  | NA   | 0 | 0 | Not-determined | Genome-fragment | NA    | 0     |
| S4_k141_131194                             | 1463  | No  | NA   | 0 | 1 | Not-determined | Genome-fragment | NA    | 0     |
| S4_k141_26834                              | 1088  | No  | NA   | 0 | 2 | Not-determined | Genome-fragment | NA    | 0     |
| S4_k141_166029                             | 1844  | No  | NA   | 0 | 0 | Not-determined | Genome-fragment | NA    | 0     |
| S4_k141_89624                              | 1272  | No  | NA   | 0 | 2 | Not-determined | Genome-fragment | NA    | 0     |
| S4_k141_89639                              | 1517  | No  | NA   | 0 | 1 | Not-determined | Genome-fragment | NA    | 0     |
| S11-final-viral-combined_k141_214754  full | 6310  | No  | NA   | 5 | 0 | Low-quality    | Genome-fragment | 15.42 | 0     |
| S4_k141_145857                             | 1301  | No  | NA   | 0 | 1 | Not-determined | Genome-fragment | NA    | 0     |
| S4_k141_367166                             | 1019  | No  | NA   | 0 | 1 | Not-determined | Genome-fragment | NA    | 0     |
| S4_k141_68980                              | 1178  | No  | NA   | 0 | 0 | Not-determined | Genome-fragment | NA    | 0     |
| S4_k141_61524                              | 1105  | No  | NA   | 0 | 0 | Not-determined | Genome-fragment | NA    | 0     |
| S4_k141_40940                              | 2455  | No  | NA   | 0 | 1 | Not-determined | Genome-fragment | NA    | 0     |
| S1-final-viral-combined_k141_120356  full  | 6311  | No  | NA   | 0 | 5 | Low-quality    | Genome-fragment | 4.01  | 0     |
| S11-final-viral-combined_k141_146057  full | 6317  | No  | NA   | 7 | 0 | Low-quality    | Genome-fragment | 10.15 | 0     |
| S4_k141_103364                             | 1052  | No  | NA   | 0 | 0 | Not-determined | Genome-fragment | NA    | 0     |
| S1-final-viral-combined_k141_185240  full  | 6318  | No  | NA   | 7 | 0 | Low-quality    | Genome-fragment | 18.09 | 0     |
| S7_k141_189382                             | 6319  | No  | NA   | 3 | 0 | Low-quality    | Genome-fragment | 14.71 | 0     |
| S4_k141_83342                              | 1056  | No  | NA   | 0 | 1 | Not-determined | Genome-fragment | NA    | 0     |
| S4_k141_13257                              | 1143  | No  | NA   | 0 | 0 | Not-determined | Genome-fragment | NA    | 0     |
| S4_k141_96824                              | 1019  | No  | NA   | 0 | 1 | Not-determined | Genome-fragment | NA    | 0     |
| S17-final-viral-combined_k141_93802  full  | 6325  | No  | NA   | 0 | 3 | Low-quality    | Genome-fragment | 4.83  | 0     |
| S4_k141_76104                              | 1446  | No  | NA   | 0 | 1 | Not-determined | Genome-fragment | NA    | 0     |
| S4_k141_34203                              | 8511  | No  | NA   | 0 | 3 | Not-determined | Genome-fragment | NA    | 0     |
| S7-final-viral-combined_k141_194783  full  | 6328  | No  | NA   | 0 | 1 | Low-quality    | Genome-fragment | 11.27 | 0     |
| S4_k141_13287                              | 1329  | No  | NA   | 0 | 2 | Not-determined | Genome-fragment | NA    | 0     |
| S1_k141_256411                             | 6331  | No  | NA   | 8 | 0 | Low-quality    | Genome-fragment | 15.88 | 0     |
| S2-final-viral-combined_k141_206249  full  | 6332  | Yes | 5176 | 1 | 1 | Low-quality    | Genome-fragment | 3.95  | 18.26 |
| S4_k141_159720                             | 1513  | No  | NA   | 0 | 1 | Not-determined | Genome-fragment | NA    | 0     |
| S4_k141_34214                              | 1077  | No  | NA   | 0 | 1 | Not-determined | Genome-fragment | NA    | 0     |
| S4_k141_76150                              | 1075  | No  | NA   | 0 | 0 | Not-determined | Genome-fragment | NA    | 0     |
| S1_k141_101303                             | 6335  | No  | NA   | 0 | 0 | Low-quality    | Genome-fragment | 15    | 0     |
| S4_k141_                                   |       |     |      |   |   |                |                 |       |       |



|                                            |       |     |      |   |   |                |                 |    |       |
|--------------------------------------------|-------|-----|------|---|---|----------------|-----------------|----|-------|
| S4_k141_159874                             | 1554  | No  | NA   | 0 | 1 | Not-determined | Genome-fragment | NA | 0     |
| S4_k141_117552                             | 4568  | No  | NA   | 0 | 4 | Not-determined | Genome-fragment | NA | 0     |
| S11-final-viral-combined_k141_131591[full] | 6360  | No  | NA   | 2 | 0 | Low-quality    | Genome-fragment | NA | 8.46  |
| S4_k141_61783                              | 1411  | No  | NA   | 0 | 1 | Not-determined | Genome-fragment | NA | 0     |
| S4_k141_89886                              | 1189  | No  | NA   | 0 | 0 | Not-determined | Genome-fragment | NA | 0     |
| S4_k141_103564                             | 1009  | No  | NA   | 0 | 1 | Not-determined | Genome-fragment | NA | 0     |
| S4_k141_138594                             | 3856  | No  | NA   | 0 | 2 | Not-determined | Genome-fragment | NA | 0     |
| S4_k141_117692                             | 3140  | No  | NA   | 0 | 1 | Not-determined | Genome-fragment | NA | 0     |
| S4_k141_146093                             | 4344  | No  | NA   | 0 | 4 | Not-determined | Genome-fragment | NA | 0     |
| S4_k141_76314                              | 5425  | No  | NA   | 0 | 4 | Not-determined | Genome-fragment | NA | 0     |
| S4_k141_138599                             | 4849  | No  | NA   | 0 | 4 | Not-determined | Genome-fragment | NA | 0     |
| S4_k141_97012                              | 1011  | No  | NA   | 0 | 0 | Not-determined | Genome-fragment | NA | 0     |
| S4_k141_13461                              | 1068  | No  | NA   | 0 | 0 | Not-determined | Genome-fragment | NA | 0     |
| S4_k141_138601                             | 2003  | No  | NA   | 0 | 1 | Not-determined | Genome-fragment | NA | 0     |
| S4_k141_117707                             | 1034  | No  | NA   | 0 | 0 | Not-determined | Genome-fragment | NA | 0     |
| S4_k141_138612                             | 7674  | No  | NA   | 0 | 2 | Not-determined | Genome-fragment | NA | 0     |
| S4_k141_61830                              | 1404  | No  | NA   | 0 | 0 | Not-determined | Genome-fragment | NA | 0     |
| S4_k141_146124                             | 6608  | No  | NA   | 0 | 4 | Not-determined | Genome-fragment | NA | 0     |
| S1-final-viral-combined_k141_1220141[full] | 6360  | No  | NA   | 0 | 1 | Low-quality    | Genome-fragment | NA | 2.11  |
| S4-final-viral-combined_k141_100742[full]  | 6360  | Yes | 5384 | 3 | 1 | Low-quality    | Genome-fragment | NA | 12.57 |
| S4_k141_41165                              | 1414  | No  | NA   | 0 | 0 | Not-determined | Genome-fragment | NA | 0     |
| S4_k141_54635                              | 1402  | No  | NA   | 0 | 0 | Not-determined | Genome-fragment | NA | 0     |
| S4_k141_19743                              | 1838  | No  | NA   | 0 | 0 | Not-determined | Genome-fragment | NA | 0     |
| S4_k141_6359                               | 1141  | No  | NA   | 0 | 0 | Not-determined | Genome-fragment | NA | 0     |
| S4_k141_69286                              | 2631  | No  | NA   | 0 | 1 | Not-determined | Genome-fragment | NA | 0     |
| S4_k141_166330                             | 1382  | No  | NA   | 0 | 2 | Not-determined | Genome-fragment | NA | 0     |
| S4_k141_159993                             | 1160  | No  | NA   | 0 | 0 | Not-determined | Genome-fragment | NA | 0     |
| S4_k141_103659                             | 1345  | No  | NA   | 0 | 1 | Not-determined | Genome-fragment | NA | 0     |
| S4_k141_13524                              | 6110  | No  | NA   | 0 | 3 | Not-determined | Genome-fragment | NA | 0     |
| S4_k141_152477                             | 2103  | No  | NA   | 0 | 2 | Not-determined | Genome-fragment | NA | 0     |
| S4_k141_48420                              | 1031  | No  | NA   | 0 | 2 | Not-determined | Genome-fragment | NA | 0     |
| S4_k141_83575                              | 1037  | No  | NA   | 0 | 1 | Not-determined | Genome-fragment | NA | 0     |
| S8-final-viral-combined_k141_952001[full]  | 6362  | No  | NA   | 0 | 1 | Low-quality    | Genome-fragment | NA | 3.85  |
| S4_k141_166363                             | 1107  | No  | NA   | 0 | 1 | Not-determined | Genome-fragment | NA | 0     |
| S4_k141_111416                             | 3279  | No  | NA   | 0 | 2 | Not-determined | Genome-fragment | NA | 0     |
| S4_k141_76391                              | 1228  | No  | NA   | 0 | 0 | Not-determined | Genome-fragment | NA | 0     |
| S7-final-viral-combined_k141_135182[full]  | 6365  | No  | NA   | 4 | 0 | Low-quality    | Genome-fragment | NA | 13.22 |
| S4_k141_103720                             | 2461  | No  | NA   | 0 | 1 | Not-determined | Genome-fragment | NA | 0     |
| S4_k141_34313                              | 2427  | No  | NA   | 0 | 2 | Not-determined | Genome-fragment | NA | 0     |
| S4_k141_19795                              | 1082  | No  | NA   | 0 | 0 | Not-determined | Genome-fragment | NA | 0     |
| S2_k141_91497                              | 6367  | No  | NA   | 4 | 0 | Low-quality    | Genome-fragment | NA | 13.06 |
| S4_k141_138759                             | 1500  | No  | NA   | 0 | 2 | Not-determined | Genome-fragment | NA | 0     |
| S4_k141_124387                             | 1264  | No  | NA   | 0 | 3 | Not-determined | Genome-fragment | NA | 0     |
| S4_k141_138786                             | 1585  | No  | NA   | 0 | 0 | Not-determined | Genome-fragment | NA | 0     |
| S4_k141_27301                              | 1263  | No  | NA   | 0 | 1 | Not-determined | Genome-fragment | NA | 0     |
| S4_k141_54767                              | 2823  | No  | NA   | 0 | 1 | Not-determined | Genome-fragment | NA | 0     |
| S4_k141_76464                              | 1535  | No  | NA   | 0 | 0 | Not-determined | Genome-fragment | NA | 0     |
| S4_k141_19867                              | 1100  | No  | NA   | 0 | 1 | Not-determined | Genome-fragment | NA | 0     |
| S4_k141_24556                              | 1278  | No  | NA   | 0 | 1 | Not-determined | Genome-fragment | NA | 0     |
| S4_k141_6500                               | 1265  | No  | NA   | 0 | 1 | Not-determined | Genome-fragment | NA | 0     |
| S4_k141_90039                              | 1104  | No  | NA   | 0 | 1 | Not-determined | Genome-fragment | NA | 0     |
| S4_k141_138825                             | 1123  | No  | NA   | 0 | 1 | Not-determined | Genome-fragment | NA | 0     |
| S4_k141_62050                              | 1898  | No  | NA   | 0 | 0 | Not-determined | Genome-fragment | NA | 0     |
| S5-final-viral-combined_k141_108478[full]  | 6368  | No  | NA   | 0 | 1 | Low-quality    | Genome-fragment | NA | 6.62  |
| S2-final-viral-combined_k141_63228[full]   | 6369  | Yes | 2556 | 2 | 2 | Low-quality    | Genome-fragment | NA | 3.98  |
| S11_k141_239018                            | 6372  | No  | NA   | 0 | 2 | Low-quality    | Genome-fragment | NA | 11    |
| S4_k141_13651                              | 3854  | No  | NA   | 0 | 2 | Not-determined | Genome-fragment | NA | 0     |
| S4_k141_6560                               | 3012  | No  | NA   | 0 | 0 | Not-determined | Genome-fragment | NA | 0     |
| S4_k141_166513                             | 2248  | No  | NA   | 0 | 1 | Not-determined | Genome-fragment | NA | 0     |
| S4_k141_131656                             | 3299  | No  | NA   | 0 | 4 | Not-determined | Genome-fragment | NA | 0     |
| S4_k141_48585                              | 11027 | No  | NA   | 0 | 6 | Not-determined | Genome-fragment | NA | 0     |
| S4_k141_76525                              | 9307  | No  | NA   | 0 | 4 | Not-determined | Genome-fragment | NA | 0     |
| S4_k141_90141                              | 1131  | No  | NA   | 0 | 0 | Not-determined | Genome-fragment | NA | 0     |
| S4_k141_117894                             | 1208  | No  | NA   | 0 | 1 | Not-determined | Genome-fragment | NA | 0     |
| S4_k141_62147                              | 3407  | No  | NA   | 0 | 1 | Not-determined | Genome-fragment | NA | 0     |
| S4_k141_103724                             | 1126  | No  | NA   | 0 | 1 | Not-determined | Genome-fragment | NA | 0     |
| S11_k141_213274                            | 6381  | No  | NA   | 0 | 3 | Low-quality    | Genome-fragment | NA | 5.79  |
| S4_k141_166579                             | 1613  | No  | NA   | 0 | 1 | Not-determined | Genome-fragment | NA | 0     |
| S4_k141_136091                             | 1157  | No  | NA   | 0 | 1 | Not-determined | Genome-fragment | NA | 0     |
| S4_k141_19961                              | 1273  | No  | NA   | 0 | 1 | Not-determined | Genome-fragment | NA | 0     |
| S17-final-viral-combined_k141_208533[full] | 6382  | No  | NA   | 0 | 5 | Low-quality    | Genome-fragment | NA | 5.13  |
| S4_k141_54931                              | 1201  | No  | NA   | 0 | 0 | Not-determined | Genome-fragment | NA | 0     |
| S4_k141_41401                              | 1263  | No  | NA   | 0 | 0 | Not-determined | Genome-fragment | NA | 0     |
| S4_k141_166595                             | 1256  | No  | NA   | 0 | 0 | Not-determined | Genome-fragment | NA | 0     |
| S4_k141_152614                             | 1085  | No  | NA   | 0 | 1 | Not-determined | Genome-fragment | NA | 0     |
| S4_k141_97249                              | 1106  | No  | NA   | 0 | 0 | Not-determined | Genome-fragment | NA | 0     |
| S4_k141_62199                              | 1347  | No  | NA   | 0 | 2 | Not-determined | Genome-fragment | NA | 0     |
| S8-final-viral-combined_k141_132026[full]  | 6384  | No  | NA   | 0 | 6 | Low-quality    | Genome-fragment | NA | 2.7   |
| S4_k141_19981                              | 3108  | No  | NA   | 0 | 1 | Not-determined | Genome-fragment | NA | 0     |
| S4_k141_90201                              | 1879  | No  | NA   | 0 | 1 | Not-determined | Genome-fragment | NA | 0     |
| S4_k141_14548                              | 4781  | No  | NA   | 0 | 2 | Not-determined | Genome-fragment | NA | 0     |
| S8-final-viral-combined_k141_232498[full]  | 6385  | No  | NA   | 0 | 3 | Low-quality    | Genome-fragment | NA | 2     |
| S4_k141_48652                              | 1013  | No  | NA   | 0 | 1 | Not-determined | Genome-fragment | NA | 0     |
| S4_k141_97293                              | 4273  | No  | NA   | 0 | 5 | Not-determined | Genome-fragment | NA | 0     |
| S7-final-viral-combined_k141_93578[full]   | 6392  | No  | NA   | 0 | 5 | Low-quality    | Genome-fragment | NA | 3.44  |
| S4_k141_41441                              | 1785  | No  | NA   | 0 | 0 | Not-determined | Genome-fragment | NA | 0     |
| S4_k141_103814                             | 1018  | No  | NA   | 0 | 0 | Not-determined | Genome-fragment | NA | 0     |
| S1-final-viral-combined_k141_279157[full]  | 6401  | No  | NA   | 6 | 0 | Low-quality    | Genome-fragment | NA | 14.74 |
| S4_k141_41461                              | 1654  | No  | NA   | 0 | 4 | Not-determined | Genome-fragment | NA | 0     |
| S4_k141_166677                             | 2441  | No  | NA   | 0 | 1 | Not-determined | Genome-fragment | NA | 0     |
| S12-final-viral-combined_k141_264254[full] | 6403  | No  | NA   | 0 | 1 | Low-quality    | Genome-fragment | NA | 12.62 |
| S12-final-viral-combined_k141_358036[full] | 6406  | No  | NA   | 0 | 1 | Low-quality    | Genome-fragment | NA | 11.94 |
| S7-final-viral-combined_k141_19917[full]   | 6408  | No  | NA   | 1 | 0 | Low-quality    | Genome-fragment | NA | 5.16  |
| S4_k141_20048                              | 3570  | No  | NA   | 0 | 2 | Not-determined | Genome-fragment | NA | 0     |
| S4_k141_27497                              | 1715  | No  | NA   | 0 | 1 | Not-determined | Genome-fragment | NA | 0     |
| S4_k141_139090                             | 1001  | No  | NA   | 0 | 1 | Not-determined | Genome-fragment | NA | 0     |
| S4_k141_103844                             | 1160  | No  | NA   | 0 | 0 | Not-determined | Genome-fragment | NA | 0     |
| S4_k141_90279                              | 1870  | No  | NA   | 0 | 1 | Not-determined | Genome-fragment | NA | 0     |
| S4_k141_20064                              | 1161  | No  | NA   | 0 | 1 | Not-determined | Genome-fragment | NA | 0     |
| S17-final-viral-combined_k141_170786[full] | 6410  | No  | NA   | 0 | 2 | Low-quality    | Genome-fragment | NA | 3.69  |
| S4_k141_166721                             | 1416  | No  | NA   | 0 | 1 | Not-determined | Genome-fragment | NA | 0     |
| S4_k141_90326                              | 1208  | No  | NA   | 0 | 0 | Not-determined | Genome-fragment | NA | 0     |
| S4_k141_124687                             | 1471  | No  | NA   | 0 | 1 | Not-determined | Genome-fragment | NA | 0     |
| S4_k141_69656                              | 1050  | No  | NA   | 0 | 1 | Not-determined | Genome-fragment | NA | 0     |
| S11-final-viral-combined_k141_193173[full] | 6414  | No  | NA   | 2 | 0 | Low-quality    | Genome-fragment | NA | 10.47 |
| S4_k141_97387                              | 1003  | No  | NA   | 0 | 1 | Not-determined | Genome-fragment | NA | 0     |
| S4_k141_131838                             | 1167  | No  | NA   | 0 | 1 | Not-determined | Genome-fragment | NA | 0     |
| S4_k141_166776                             | 1107  | No  | NA   | 0 | 0 | Not-determined | Genome-fragment | NA | 0     |
| S4_k141_55028                              | 1805  | No  | NA   | 0 | 0 | Not-determined | Genome-fragment | NA | 0     |
| S4_k141_131861                             | 1108  | No  | NA   | 0 | 1 | Not-determined | Genome-fragment | NA | 0     |
| S4_k141_48759                              | 4642  | No  | NA   | 0 | 5 | Not-determined | Genome-fragment | NA | 0     |
| S4_k141_124724                             | 1808  | No  | NA   | 0 | 1 | Not-determined | Genome-fragment | NA | 0     |
| S2-final-viral-combined_k141_813[full]     | 6414  | No  | NA   | 2 | 1 | Low-quality    | Genome-fragment | NA | 6.38  |
| S4_k141_34742                              | 1021  | No  | NA   | 0 | 1 | Not-determined | Genome-fragment | NA | 0     |
| S4_k141_62289                              | 1265  | No  | NA   | 0 | 1 | Not-determined | Genome-fragment | NA | 0     |
| S4_k141_27626                              | 2687  | No  | NA   | 0 | 1 | Not-determined | Genome-fragment | NA | 0     |
| S4_k141_152895                             | 1500  | No  | NA   | 0 | 0 | Not-determined | Genome-fragment | NA | 0     |
| S4_k141_166797                             | 3505  | No  | NA   | 0 | 3 | Not-determined | Genome-fragment | NA | 0     |
| S4_k141_152902                             | 1151  | No  | NA   | 0 | 1 | Not-determined | Genome-fragment | NA | 0     |
| S4_k141_124778                             | 2292  | No  | NA   | 0 | 1 | Not-determined | Genome-fragment | NA | 0     |
| S4_k141_124780                             | 1707  | No  | NA   | 0 | 0 | Not-determined | Genome-fragment | NA | 0     |
| S4_k141_152906                             | 2560  | No  | NA   | 0 | 3 | Not-determined | Genome-fragment | NA | 0     |
| S8-final-viral-combined_k141_155622[full]  | 6419  | Yes | 4108 | 1 | 1 | Low-quality    | Genome-fragment | NA | 4.61  |
| S4_k141_20165                              | 10553 | No  | NA   | 0 | 3 | Not-determined | Genome-fragment | NA | 36    |
| S4_k141_90432                              | 1042  | No  | NA   | 0 | 1 | Not-determined | Genome-fragment | NA | 0     |
| S4_k141_13912                              | 1676  | No  | NA   | 0 | 3 | Not-determined | Genome-fragment | NA | 0     |
| S4_k141_6829                               | 1071  | No  | NA   | 0 | 1 | Not-determined | Genome-fragment | NA | 0     |
| S4_k141_131908                             | 4526  | No  | NA   | 0 | 1 | Not-determined | Genome-fragment | NA | 0     |
| S4_k141_27653                              | 7982  | No  | NA   | 0 | 2 | Not-determined | Genome-fragment | NA | 0     |
| S4_k141_139259                             | 1157  | No  | NA   | 0 | 1 | Not-determined | Genome-fragment | NA | 0     |
| S7-final-viral-combined_k141_24233[full]   | 6421  | No  | NA   | 0 | 0 | Low-quality    | Genome-fragment | NA | 13.46 |
| S4_k141_20182                              | 2793  | No  | NA   | 0 | 1 | Not-determined | Genome-fragment | NA | 0     |
| S12-final-viral-combined_k141_112023[full] | 6422  | No  | NA   | 0 | 0 | Low-quality    | Genome-fragment | NA | 10.64 |
| S11-final-viral-combined_k141_242686[full] | 6424  | No  | NA   | 3 | 0 | Low-quality    | Genome-fragment | NA | 10.57 |
| S4_k141_41572                              | 1919  | No  | NA   | 0 | 2 | Not-determined | Genome-fragment | NA | 0     |
| S4_k141_152969                             | 1058  | No  | NA   | 0 | 1 | Not-determined | Genome-fragment | NA | 0     |
| S4_k141_139282                             | 3272  | No  | NA   | 0 | 3 | Not-determined | Genome-fragment | NA | 0     |
| S4_k141_24819                              | 1249  | No  | NA   | 0 | 0 | Not-determined | Genome-fragment | NA | 0     |
| S4_k141_166837                             | 1176  | No  | NA   | 0 | 0 | Not-determined | Genome-fragment | NA | 0     |
| S4_k141_104004                             | 3989  | No  | NA   | 0 | 2 | Not-determined | Genome-fragment | NA | 0     |
| S4_k141_27683                              | 1793  | No  | NA   | 0 | 2 | Not-determined | Genome-fragment | NA | 0     |
| S4_k141_139293                             | 1611  | No  | NA   | 0 | 0 | Not-determined | Genome-fragment | NA | 0     |
| S4_k141_17841                              | 6425  | No  | NA   | 1 | 0 | Low-quality    | Genome-fragment | NA | 17.95 |
| S3-final-viral-combined_k141_94641[full]   | 6427  | No  | NA   | 0 | 4 | Low-quality    | Genome-fragment | NA | 4.23  |
| S4_k141_104050                             | 1761  | No  | NA   | 0 | 1 | Not-determined | Genome-fragment | NA | 0     |
| S4_k141_118242                             | 2360  | No  | NA   | 0 | 1 | Not-determined | Genome-fragment | NA | 0     |
| S12_k141_199703                            | 6427  | No  | NA   | 0 |   |                |                 |    |       |



|                                      |         |     |    |       |    |                |                 |              |       |
|--------------------------------------|---------|-----|----|-------|----|----------------|-----------------|--------------|-------|
| S4_k141_62635                        | 44295   | No  | NA | 20    | 0  | High-quality   | High-quality    | 98.17        | 0     |
| S4_k141_55273                        | 1392    | No  | NA | 0     | 0  | Not-determined | Genome-fragment | NA           | 0     |
| S4_k141_55280                        | 1745    | No  | NA | 0     | 0  | Not-determined | Genome-fragment | NA           | 0     |
| S5-final-viral-combined_k141_47368   | 6444    | No  | NA | 6     | 0  | Low-quality    | Genome-fragment | 17.05        | 0     |
| S4_k141_125154                       | 1101    | No  | NA | 0     | 0  | Not-determined | Genome-fragment | NA           | 0     |
| S4_k141_20472                        | 3072    | No  | NA | 0     | 1  | Not-determined | Genome-fragment | NA           | 0     |
| S4_k141_125165                       | 1158    | No  | NA | 0     | 1  | Not-determined | Genome-fragment | NA           | 0     |
| S4_k141_132336                       | 1208    | No  | NA | 0     | 1  | Not-determined | Genome-fragment | NA           | 0     |
| S17-final-viral-combined_k141_100117 | 6444    | No  | NA | 1     | 0  | Low-quality    | Genome-fragment | 17.77        | 0     |
| S4_k141_125232                       | 2809    | No  | NA | 0     | 3  | Not-determined | Genome-fragment | NA           | 0     |
| S12-final-viral-combined_k141_112289 | 6444    | No  | NA | 4     | 0  | Low-quality    | Genome-fragment | 19.43        | 0     |
| S4_k141_20571                        | 1188    | No  | NA | 0     | 0  | Not-determined | Genome-fragment | NA           | 0     |
| S4_k141_132342                       | 1333    | No  | NA | 0     | 2  | Not-determined | Genome-fragment | NA           | 0     |
| S12-final-viral-combined_k141_358759 | 6448    | No  | NA | 0     | 5  | Low-quality    | Genome-fragment | 4.7          | 0     |
| S4_k141_125277                       | 1085    | No  | NA | 0     | 0  | Not-determined | Genome-fragment | NA           | 0     |
| S3-final-viral-combined_k141_75824   | 6449    | No  | NA | 0     | 1  | Low-quality    | Genome-fragment | 4.72         | 0     |
| S4_k141_55604                        | 1686    | No  | NA | 0     | 2  | Not-determined | Genome-fragment | NA           | 0     |
| S4_k141_125348                       | 7345    | No  | NA | 0     | 3  | Not-determined | Genome-fragment | NA           | 0     |
| S4_k141_55685                        | 1154    | No  | NA | 0     | 0  | Not-determined | Genome-fragment | NA           | 0     |
| S4_k141_20848                        | 1334    | No  | NA | 0     | 1  | Not-determined | Genome-fragment | NA           | 0     |
| S6-final-viral-combined_k141_117756  | 51257   | No  | NA | 20    | 0  | High-quality   | High-quality    | 100          | 0     |
| S6-final-viral-combined_k141_6450    | 3559    | No  | NA | 0     | 2  | Not-determined | Genome-fragment | NA           | 0     |
| S6-final-viral-combined_k141_136044  | 3740    | No  | NA | 0     | 3  | Not-determined | Genome-fragment | NA           | 0     |
| S6-final-viral-combined_k141_14387   | 33637   | No  | NA | 0     | 13 | Not-determined | Genome-fragment | NA           | 0     |
| S1-final-viral-combined_k141_56221   | 6451    | No  | NA | 0     | 1  | Low-quality    | Genome-fragment | 18.6         | 0     |
| S6-final-viral-combined_k141_123301  | 1650    | No  | NA | 0     | 1  | Not-determined | Genome-fragment | NA           | 0     |
| S6-final-viral-combined_k141_64598   | 2207    | No  | NA | 0     | 2  | Not-determined | Genome-fragment | NA           | 0     |
| S6-final-viral-combined_k141_11753   | 4173    | No  | NA | 0     | 2  | Not-determined | Genome-fragment | NA           | 0     |
| S6-final-viral-combined_k141_123304  | 1016    | No  | NA | 0     | 0  | Not-determined | Genome-fragment | NA           | 0     |
| S3_k141_74835                        | 6451    | No  | NA | 1     | 0  | Low-quality    | Genome-fragment | 8.17         | 0     |
| S11_k141_234216                      | 6454    | No  | NA | 0     | 5  | Low-quality    | Genome-fragment | 3.36         | 0     |
| S6-final-viral-combined_k141_23502   | 1658    | No  | NA | 0     | 0  | Not-determined | Genome-fragment | NA           | 0     |
| S6-final-viral-combined_k141_93968   | 2132    | No  | NA | 0     | 3  | Not-determined | Genome-fragment | NA           | 0     |
| S2-final-viral-combined_k141_78888   | 6454    | No  | NA | 4     | 0  | Low-quality    | Genome-fragment | 7.31         | 0     |
| S6-final-viral-combined_k141_82240   | 2670    | No  | NA | 0     | 2  | Not-determined | Genome-fragment | NA           | 0     |
| S6-final-viral-combined_k141_135061  | 1128    | No  | NA | 0     | 2  | Not-determined | Genome-fragment | NA           | 0     |
| S2_k141_25678                        | 6456    | No  | NA | 0     | 0  | Low-quality    | Genome-fragment | 35.19        | 0     |
| S6-final-viral-combined_k141_82256   | 1467    | No  | NA | 0     | 0  | Not-determined | Genome-fragment | NA           | 0     |
| S6-final-viral-combined_k141_60      | 2202    | No  | NA | 0     | 2  | Not-determined | Genome-fragment | NA           | 0     |
| S6-final-viral-combined_k141_23525   | 1844    | No  | NA | 0     | 2  | Not-determined | Genome-fragment | NA           | 0     |
| S6-final-viral-combined_k141_11789   | 2833    | No  | NA | 0     | 0  | Not-determined | Genome-fragment | NA           | 0     |
| S6-final-viral-combined_k141_7638    | 1156    | No  | NA | 1     | 1  | Not-determined | Genome-fragment | NA           | 0     |
| S11-final-viral-combined_k141_84762  | 6457    | No  | NA | 6     | 0  | Low-quality    | Genome-fragment | 14.45        | 0     |
| S6-final-viral-combined_k141_88      | 2183    | No  | NA | 0     | 1  | Not-determined | Genome-fragment | NA           | 0     |
| S6-final-viral-combined_k141_17670   | 1510    | No  | NA | 0     | 0  | Not-determined | Genome-fragment | NA           | 0     |
| S11_k141_35698                       | 6458    | No  | NA | 0     | 0  | Low-quality    | Genome-fragment | 7.13         | 0     |
| S11-final-viral-combined_k141_308832 | 6459    | No  | NA | 4     | 0  | Low-quality    | Genome-fragment | 9.71         | 0     |
| S6-final-viral-combined_k141_117447  | 3149    | No  | NA | 0     | 1  | Not-determined | Genome-fragment | NA           | 0     |
| S2-final-viral-combined_k141_22830   | 6460    | No  | NA | 0     | 1  | Low-quality    | Genome-fragment | 3.27         | 0     |
| S6-final-viral-combined_k141_64690   | 5429    | No  | NA | 0     | 3  | Not-determined | Genome-fragment | NA           | 0     |
| S6-final-viral-combined_k141_17690   | 3078    | No  | NA | 0     | 0  | Not-determined | Genome-fragment | NA           | 0     |
| S6-final-viral-combined_k141_117461  | 1682    | No  | NA | 0     | 0  | Not-determined | Genome-fragment | NA           | 0     |
| S11-final-viral-combined_k141_883090 | 6462    | No  | NA | 6     | 0  | Low-quality    | Genome-fragment | 14.39        | 0     |
| S6-final-viral-combined_k141_88170   | 1445    | No  | NA | 0     | 2  | Not-determined | Genome-fragment | NA           | 0     |
| S6-final-viral-combined_k141_35319   | 18923   | No  | NA | 10    | 0  | Not-determined | Genome-fragment | NA           | 0     |
| S1-final-viral-combined_k141_221593  | 6464    | No  | NA | 0     | 1  | Low-quality    | Genome-fragment | 4.82         | 0     |
| S6-final-viral-combined_k141_40097   | 6464    | No  | NA | 0     | 0  | Low-quality    | Genome-fragment | 12.71        | 0     |
| S6_k141_23435                        | 1631    | No  | NA | 0     | 1  | Not-determined | Genome-fragment | NA           | 0     |
| S6-final-viral-combined_k141_129263  | 6466    | No  | NA | 2     | 0  | Low-quality    | Genome-fragment | 15.35        | 0     |
| S6-final-viral-combined_k141_116661  | 4049    | No  | NA | 0     | 2  | Not-determined | Genome-fragment | NA           | 0     |
| S6-final-viral-combined_k141_116567  | 2691    | No  | NA | 0     | 2  | Not-determined | Genome-fragment | NA           | 0     |
| S6-final-viral-combined_k141_34058   | 1485    | No  | NA | 0     | 1  | Not-determined | Genome-fragment | NA           | 0     |
| S6-final-viral-combined_k141_111661  | 3978    | No  | NA | 0     | 3  | Not-determined | Genome-fragment | NA           | 0     |
| S6-final-viral-combined_k141_135156  | 4211    | No  | NA | 0     | 1  | Not-determined | Genome-fragment | NA           | 0     |
| S8-final-viral-combined_k141_21797   | 6468    | No  | NA | 0     | 0  | Low-quality    | Genome-fragment | 11.89        | 0     |
| S6-final-viral-combined_k141_64669   | 3736    | No  | NA | 0     | 1  | Not-determined | Genome-fragment | NA           | 0     |
| S6-final-viral-combined_k141_117500  | 3712    | No  | NA | 0     | 3  | Not-determined | Genome-fragment | NA           | 0     |
| S11_k141_275970                      | 6469    | No  | NA | 0     | 1  | Low-quality    | Genome-fragment | 11.33        | 0     |
| S6-final-viral-combined_k141_88242   | 1217    | No  | NA | 0     | 0  | Not-determined | Genome-fragment | NA           | 0     |
| S1-final-viral-combined_k141_218397  | 6470    | No  | NA | 0     | 1  | Low-quality    | Genome-fragment | 19.59        | 0     |
| S6-final-viral-combined_k141_41237   | 3004    | No  | NA | 0     | 3  | Not-determined | Genome-fragment | NA           | 0     |
| S6-final-viral-combined_k141_123420  | 1757    | No  | NA | 0     | 0  | Not-determined | Genome-fragment | NA           | 0     |
| S1_k141_71183                        | 6471    | No  | NA | 1     | 1  | Low-quality    | Genome-fragment | 3.45         | 0     |
| S6-final-viral-combined_k141_64731   | 1162    | No  | NA | 0     | 1  | Not-determined | Genome-fragment | NA           | 0     |
| S5-final-viral-combined_k141_7668    | 6472    | Yes | NA | 3012  | 0  | Low-quality    | Genome-fragment | 2.86         | 53.46 |
| S6-final-viral-combined_k141_105845  | 6754    | No  | NA | 1     | 5  | Not-determined | Genome-fragment | NA           | 0     |
| S6-final-viral-combined_k141_23580   | 2395    | No  | NA | 0     | 1  | Not-determined | Genome-fragment | NA           | 0     |
| S6-final-viral-combined_k141_5896    | 1611    | No  | NA | 0     | 1  | Not-determined | Genome-fragment | NA           | 0     |
| S6-final-viral-combined_k141_2551    | 1995    | No  | NA | 0     | 1  | Not-determined | Genome-fragment | NA           | 0     |
| S6-final-viral-combined_k141_129383  | 3209    | No  | NA | 0     | 2  | Not-determined | Genome-fragment | NA           | 0     |
| S6-final-viral-combined_k141_41246   | 40602   | No  | NA | 1     | 17 | High-quality   | High-quality    | 100          | 0     |
| S9-final-viral-combined_k141_43396   | 6473    | No  | NA | 2     | 0  | Low-quality    | Genome-fragment | 7.86         | 0     |
| S6-final-viral-combined_k141_76480   | 1256    | No  | NA | 0     | 0  | Not-determined | Genome-fragment | NA           | 0     |
| S6-final-viral-combined_k141_88297   | 2349    | No  | NA | 0     | 3  | Not-determined | Genome-fragment | NA           | 0     |
| S3-final-viral-combined_k141_412215  | 6473    | No  | NA | 0     | 0  | Low-quality    | Genome-fragment | 14.87        | 0     |
| S6-final-viral-combined_k141_35394   | 3112    | No  | NA | 0     | 1  | Not-determined | Genome-fragment | NA           | 0     |
| S6-final-viral-combined_k141_88339   | 2209    | No  | NA | 0     | 0  | Not-determined | Genome-fragment | NA           | 0     |
| S1-final-viral-combined_k141_222156  | 6477    | No  | NA | 0     | 2  | Low-quality    | Genome-fragment | 1.9          | 0     |
| S9-final-viral-combined_k141_33062   | 6478    | No  | NA | 0     | 0  | Not-determined | Genome-fragment | 0.72         | 0     |
| S6-final-viral-combined_k141_111823  | 2729    | No  | NA | 0     | 0  | Not-determined | Genome-fragment | NA           | 0     |
| S6-final-viral-combined_k141_129415  | 1379    | No  | NA | 0     | 1  | Not-determined | Genome-fragment | NA           | 0     |
| S12-final-viral-combined_k141_197856 | 6478    | No  | NA | 0     | 1  | Low-quality    | Genome-fragment | 12.5         | 0     |
| S6-final-viral-combined_k141_123490  | 3397    | No  | NA | 4     | 0  | Not-determined | Genome-fragment | NA           | 0     |
| S8-final-viral-combined_k141_13520   | 6480    | No  | NA | 4     | 0  | Low-quality    | Genome-fragment | 14.28        | 0     |
| S6-final-viral-combined_k141_24215   | 1058    | No  | NA | 0     | 1  | Not-determined | Genome-fragment | NA           | 0     |
| S6-final-viral-combined_k141_123521  | 1826    | No  | NA | 0     | 2  | Not-determined | Genome-fragment | NA           | 0     |
| S6-final-viral-combined_k141_88988   | 9717    | No  | NA | 0     | 9  | Not-determined | Genome-fragment | NA           | 0     |
| S6-final-viral-combined_k141_76592   | 1907    | No  | NA | 0     | 1  | Not-determined | Genome-fragment | NA           | 0     |
| S6-final-viral-combined_k141_12028   | 2645    | No  | NA | 0     | 0  | Not-determined | Genome-fragment | NA           | 0     |
| S6-final-viral-combined_k141_106003  | 1548    | No  | NA | 0     | 2  | Not-determined | Genome-fragment | NA           | 0     |
| S6-final-viral-combined_k141_12059   | 3319    | No  | NA | 0     | 1  | Not-determined | Genome-fragment | NA           | 0     |
| S6-final-viral-combined_k141_106030  | 1822    | No  | NA | 0     | 1  | Not-determined | Genome-fragment | NA           | 0     |
| S6-final-viral-combined_k141_6044    | 2159    | No  | NA | 0     | 1  | Not-determined | Genome-fragment | NA           | 0     |
| S6-final-viral-combined_k141_64885   | 1169    | No  | NA | 0     | 0  | Not-determined | Genome-fragment | NA           | 0     |
| S12-final-viral-combined_k141_45166  | 6483    | No  | NA | 0     | 0  | Low-quality    | Genome-fragment | 17.55        | 0     |
| S6-final-viral-combined_k141_59044   | 5578    | No  | NA | 0     | 0  | Not-determined | Genome-fragment | NA           | 0     |
| S9_k141_102224                       | 6490    | No  | NA | 4     | 0  | Low-quality    | Genome-fragment | 17.26        | 0     |
| S6-final-viral-combined_k141_35522   | 3247    | No  | NA | 0     | 4  | Not-determined | Genome-fragment | NA           | 0     |
| S17_k141_25456                       | 6482    | No  | NA | 0     | 0  | Low-quality    | Genome-fragment | 8.77         | 0     |
| S6-final-viral-combined_k141_41365   | 2808    | No  | NA | 0     | 0  | Not-determined | Genome-fragment | NA           | 0     |
| S6-final-viral-combined_k141_121271  | 1098    | No  | NA | 0     | 0  | Not-determined | Genome-fragment | NA           | 0     |
| S6-final-viral-combined_k141_135231  | 14791.3 | No  | NA | 0     | 0  | Medium-quality | Genome-fragment | 79.46        | 0     |
| S6-final-viral-combined_k141_59082   | 2065    | No  | NA | 0     | 2  | Not-determined | Genome-fragment | NA           | 0     |
| S12-final-viral-combined_k141_203299 | 6494    | No  | NA | 0     | 1  | Low-quality    | Genome-fragment | 5.29         | 0     |
| S11_k141_21228                       | 6500    | Yes | NA | 2885  | 1  | Low-quality    | Genome-fragment | 6.2          | 53.62 |
| S1-final-viral-combined_k141_309353  | 6500    | No  | NA | 0     | 0  | Low-quality    | Genome-fragment | 7.32         | 0     |
| S6-final-viral-combined_k141_59093   | 1366    | No  | NA | 0     | 1  | Not-determined | Genome-fragment | NA           | 0     |
| S6-final-viral-combined_k141_94344   | 2901    | No  | NA | 0     | 0  | Not-determined | Genome-fragment | NA           | 0     |
| S6_k141_110399                       | 6502    | No  | NA | 4     | 1  | Low-quality    | Genome-fragment | 18.21        | 0     |
| S6-final-viral-combined_k141_88414   | 101171  | Yes | NA | 30132 | 14 | 48             | Complete        | High-quality | 100   |
| S6-final-viral-combined_k141_88422   | 1610    | No  | NA | 0     | 1  | Not-determined | Genome-fragment | NA           | 0     |
| S6-final-viral-combined_k141_6096    | 2259    | No  | NA | 0     | 0  | Not-determined | Genome-fragment | NA           | 0     |
| S6-final-viral-combined_k141_82444   | 5380    | No  | NA | 0     | 4  | Not-determined | Genome-fragment | NA           | 0     |
| S6-final-viral-combined_k141_59157   | 3952    | No  | NA | 0     | 3  | Not-determined | Genome-fragment | NA           | 0     |
| S6-final-viral-combined_k141_23773   | 2158    | No  | NA | 0     | 1  | Not-determined | Genome-fragment | NA           | 0     |
| S2-final-viral-combined_k141_62159   | 6504    | No  | NA | 1     | 4  | Low-quality    | Genome-fragment | 16.27        | 0     |
| S2_k141_134607                       | 6504    | No  | NA | 2     | 0  | Low-quality    | Genome-fragment | 13.56        | 0     |
| S11-final-viral-combined_k141_140493 | 6506    | No  | NA | 1     | 0  | Low-quality    | Genome-fragment | 4.02         | 0     |
| S6-final-viral-combined_k141_6122    | 1611    | No  | NA | 0     | 1  | Not-determined | Genome-fragment | NA           | 0     |
| S5_k141_128692                       | 6507    | No  | NA | 3     | 1  | Low-quality    | Genome-fragment | 18.39        | 0     |
| S6-final-viral-combined_k141_94427   | 1364    | No  | NA | 0     | 1  | Not-determined | Genome-fragment | NA           | 0     |
| S7-final-viral-combined_k141_115568  | 6508    | No  | NA | 0     | 0  | Low-quality    | Genome-fragment | 7.49         | 0     |
| S9-final-viral-combined_k141_110381  | 6509    | No  | NA | 4     | 0  | Low-quality    | Genome-fragment | 16           | 0     |
| S1-final-viral-combined_k141_63940   | 6509    | No  | NA | 6     | 0  | Low-quality    | Genome-fragment | 12.41        | 0     |
| S6-final-viral-combined_k141_41549   | 2118    | No  | NA | 0     | 2  | Not-determined | Genome-fragment | NA           | 0     |
| S6-final-viral-combined_k141_76715   | 1905    | No  | NA | 0     | 0  | Not-determined | Genome-fragment | NA           | 0     |
| S6-final-viral-combined_k141_12272   | 3829    | No  | NA | 0     | 2  | Not-determined | Genome-fragment | NA           | 0     |
| S6-final-viral-combined_k141_25523   | 2255    | No  | NA | 0     | 1  | Not-determined | Genome-fragment | NA           | 0     |
| S6-final-viral-combined_k141_123743  | 4185    | No  | NA | 0     | 0  | Not-determined | Genome-fragment | NA           | 0     |
| S1-final-viral-combined_k141_382608  | 6512    | No  | NA | 0     | 1  | Low-quality    | Genome-fragment | 8.1          | 0     |
| S2-final-v                           |         |     |    |       |    |                |                 |              |       |



|                                             |        |     |    |       |    |                |                 |              |       |       |
|---------------------------------------------|--------|-----|----|-------|----|----------------|-----------------|--------------|-------|-------|
| S9-final-viral-combined_k141_963771[full]   | 6546   | No  | NA | 0     | 1  | Low-quality    | Genome-fragment | 6.75         | 0     |       |
| S11_k141_146857                             | 6548   | No  | NA | 0     | 1  | Low-quality    | Genome-fragment | 3.52         | 0     |       |
| S6-final-viral-combined_k141_710671[full]   | 1845   | No  | NA | 0     | 0  | Not-determined | Genome-fragment | NA           | 0     |       |
| S6-final-viral-combined_k141_947011[full]   | 6800   | No  | NA | 0     | 3  | Not-determined | Genome-fragment | NA           | 0     |       |
| S6-final-viral-combined_k141_129788[full]   | 2297   | No  | NA | 0     | 2  | Not-determined | Genome-fragment | NA           | 0     |       |
| S6-final-viral-combined_k141_7451[full]     | 3681.4 | No  | NA | 11    | 1  | High-quality   | High-quality    | 91.45        | 0     |       |
| S9_k141_115414                              | 6550   | No  | NA | 0     | 2  | Low-quality    | Genome-fragment | 6.15         | 0     |       |
| S6-final-viral-combined_k141_64791[full]    | 1545   | No  | NA | 0     | 0  | Not-determined | Genome-fragment | NA           | 0     |       |
| S6-final-viral-combined_k141_193731[full]   | 1064   | No  | NA | 0     | 0  | Not-determined | Genome-fragment | NA           | 0     |       |
| S6-final-viral-combined_k141_888231[full]   | 8036   | No  | NA | 0     | 7  | Not-determined | Genome-fragment | NA           | 0     |       |
| S6-final-viral-combined_k141_888361[full]   | 3138   | No  | NA | 0     | 1  | Not-determined | Genome-fragment | NA           | 0     |       |
| S6-final-viral-combined_k141_247721[full]   | 1213   | No  | NA | 0     | 2  | Not-determined | Genome-fragment | NA           | 0     |       |
| S6-final-viral-combined_k141_652081[full]   | 2061   | No  | NA | 0     | 2  | Not-determined | Genome-fragment | NA           | 0     |       |
| S6-final-viral-combined_k141_1003531[full]  | 10784  | No  | NA | 0     | 6  | Not-determined | Genome-fragment | NA           | 0     |       |
| S6-final-viral-combined_k141_888541[full]   | 1504   | No  | NA | 0     | 1  | Not-determined | Genome-fragment | NA           | 0     |       |
| S6-final-viral-combined_k141_594031[full]   | 3611   | No  | NA | 0     | 0  | Not-determined | Genome-fragment | NA           | 0     |       |
| S6-final-viral-combined_k141_8081[full]     | 1701   | No  | NA | 0     | 0  | Not-determined | Genome-fragment | NA           | 0     |       |
| S6-final-viral-combined_k141_825971[full]   | 215227 | Yes | NA | 38568 | 13 | 101            | Complete        | High-quality | 100   | 82.08 |
| S6-final-viral-combined_k141_652251[full]   | 213171 | No  | NA | 18    | 0  | Medium-quality | Genome-fragment | 62.64        | 0     |       |
| S12_k141_216804                             | 6553   | No  | NA | 8     | 1  | Low-quality    | Genome-fragment | 12.24        | 0     |       |
| S6-final-viral-combined_k141_476111[full]   | 5270   | No  | NA | 0     | 4  | Not-determined | Genome-fragment | NA           | 0     |       |
| S6-final-viral-combined_k141_1003781[full]  | 6749   | No  | NA | 0     | 2  | Not-determined | Genome-fragment | NA           | 0     |       |
| S4-final-viral-combined_k141_973911[full]   | 6553   | No  | NA | 1     | 0  | Low-quality    | Genome-fragment | 13.27        | 0     |       |
| S6-final-viral-combined_k141_1003881[full]  | 3730   | No  | NA | 0     | 0  | Not-determined | Genome-fragment | NA           | 0     |       |
| S6-final-viral-combined_k141_1298481[full]  | 1991   | No  | NA | 0     | 0  | Not-determined | Genome-fragment | NA           | 0     |       |
| S6-final-viral-combined_k141_532591[full]   | 2785   | No  | NA | 0     | 1  | Not-determined | Genome-fragment | NA           | 0     |       |
| S6-final-viral-combined_k141_653221[full]   | 1842   | No  | NA | 0     | 1  | Not-determined | Genome-fragment | NA           | 0     |       |
| S6-final-viral-combined_k141_66061[full]    | 6880   | No  | NA | 0     | 1  | Not-determined | Genome-fragment | NA           | 0     |       |
| S7-final-viral-combined_k141_1041201[full]  | 6556   | No  | NA | 0     | 1  | Low-quality    | Genome-fragment | 5.37         | 0     |       |
| S6-final-viral-combined_k141_827341[full]   | 1373   | No  | NA | 0     | 1  | Not-determined | Genome-fragment | NA           | 0     |       |
| S12-final-viral-combined_k141_2039691[full] | 6559   | No  | NA | 3     | 0  | Low-quality    | Genome-fragment | 15.56        | 0     |       |
| S2-final-viral-combined_k141_1848701[full]  | 6559   | No  | NA | 0     | 0  | Low-quality    | Genome-fragment | 15.37        | 0     |       |
| S6-final-viral-combined_k141_769551[full]   | 1699   | No  | NA | 0     | 0  | Not-determined | Genome-fragment | NA           | 0     |       |
| S6-final-viral-combined_k141_179831[full]   | 1042   | No  | NA | 0     | 1  | Not-determined | Genome-fragment | NA           | 0     |       |
| S6-final-viral-combined_k141_53091[full]    | 1240   | No  | NA | 0     | 1  | Not-determined | Genome-fragment | NA           | 0     |       |
| S6-final-viral-combined_k141_653851[full]   | 1127   | No  | NA | 0     | 2  | Not-determined | Genome-fragment | NA           | 0     |       |
| S1-final-viral-combined_k141_1895471[full]  | 6561   | No  | NA | 0     | 1  | Low-quality    | Genome-fragment | 6.98         | 0     |       |
| S7_k141_129898                              | 6563   | No  | NA | 3     | 0  | Low-quality    | Genome-fragment | 18.57        | 0     |       |
| S8-final-viral-combined_k141_2496751[full]  | 6566   | No  | NA | 0     | 4  | Low-quality    | Genome-fragment | 3.96         | 0     |       |
| S6-final-viral-combined_k141_67051[full]    | 2110   | No  | NA | 0     | 0  | Not-determined | Genome-fragment | NA           | 0     |       |
| S1-final-viral-combined_k141_3455211[full]  | 6569   | No  | NA | 0     | 0  | Low-quality    | Genome-fragment | 6.84         | 0     |       |
| S6-final-viral-combined_k141_301621[full]   | 2421   | No  | NA | 0     | 2  | Not-determined | Genome-fragment | NA           | 0     |       |
| S6-final-viral-combined_k141_770011[full]   | 1530   | No  | NA | 0     | 0  | Not-determined | Genome-fragment | NA           | 0     |       |
| S6-final-viral-combined_k141_4771511[full]  | 2167   | No  | NA | 0     | 2  | Not-determined | Genome-fragment | NA           | 0     |       |
| S6-final-viral-combined_k141_1355931[full]  | 4990   | No  | NA | 0     | 1  | Not-determined | Genome-fragment | NA           | 0     |       |
| S12_k141_161020                             | 6569   | No  | NA | 0     | 1  | Low-quality    | Genome-fragment | 3.08         | 0     |       |
| S1-final-viral-combined_k141_2744591[full]  | 6574   | No  | NA | 4     | 0  | Low-quality    | Genome-fragment | 10.9         | 0     |       |
| S6-final-viral-combined_k141_655161[full]   | 1182   | No  | NA | 0     | 0  | Not-determined | Genome-fragment | NA           | 0     |       |
| S6-final-viral-combined_k141_712971[full]   | 2582   | No  | NA | 0     | 2  | Not-determined | Genome-fragment | NA           | 0     |       |
| S6-final-viral-combined_k141_180721[full]   | 1063   | No  | NA | 0     | 0  | Not-determined | Genome-fragment | NA           | 0     |       |
| S6-final-viral-combined_k141_891971[full]   | 6282   | No  | NA | 0     | 5  | Not-determined | Genome-fragment | NA           | 0     |       |
| S6-final-viral-combined_k141_950821[full]   | 1104   | No  | NA | 0     | 1  | Not-determined | Genome-fragment | NA           | 0     |       |
| S5-final-viral-combined_k141_335341[full]   | 6574   | No  | NA | 4     | 0  | Low-quality    | Genome-fragment | 14.08        | 0     |       |
| S6-final-viral-combined_k141_126131[full]   | 13128  | No  | NA | 0     | 7  | Not-determined | Genome-fragment | NA           | 0     |       |
| S6-final-viral-combined_k141_242401[full]   | 1928   | No  | NA | 0     | 0  | Not-determined | Genome-fragment | NA           | 0     |       |
| S6-final-viral-combined_k141_892131[full]   | 1503   | No  | NA | 0     | 0  | Not-determined | Genome-fragment | NA           | 0     |       |
| S6_k141_45921                               | 6576   | No  | NA | 0     | 0  | Low-quality    | Genome-fragment | 6.88         | 0     |       |
| S6-final-viral-combined_k141_181181[full]   | 1747   | No  | NA | 0     | 1  | Not-determined | Genome-fragment | NA           | 0     |       |
| S6-final-viral-combined_k141_892361[full]   | 1470   | No  | NA | 0     | 2  | Not-determined | Genome-fragment | NA           | 0     |       |
| S6-final-viral-combined_k141_892411[full]   | 2176   | No  | NA | 0     | 2  | Not-determined | Genome-fragment | NA           | 0     |       |
| S9_k141_58221                               | 6578   | No  | NA | 0     | 1  | Low-quality    | Genome-fragment | 13.02        | 0     |       |
| S6-final-viral-combined_k141_302971[full]   | 8521   | No  | NA | 0     | 2  | Not-determined | Genome-fragment | NA           | 0     |       |
| S6-final-viral-combined_k141_358401[full]   | 6373   | No  | NA | 0     | 6  | Not-determined | Genome-fragment | NA           | 0     |       |
| S6-final-viral-combined_k141_68571[full]    | 2028   | No  | NA | 0     | 1  | Not-determined | Genome-fragment | NA           | 0     |       |
| S6-final-viral-combined_k141_829261[full]   | 3383   | No  | NA | 0     | 2  | Not-determined | Genome-fragment | NA           | 0     |       |
| S7-final-viral-combined_k141_1063101[full]  | 6580   | No  | NA | 3     | 0  | Low-quality    | Genome-fragment | 15.72        | 0     |       |
| S6-final-viral-combined_k141_1242031[full]  | 2512   | No  | NA | 0     | 2  | Not-determined | Genome-fragment | NA           | 0     |       |
| S9_k141_37555                               | 6581   | No  | NA | 5     | 0  | Low-quality    | Genome-fragment | 16.33        | 0     |       |
| S1-final-viral-combined_k141_3473561[full]  | 6581   | Yes | NA | 1     | 1  | Low-quality    | Genome-fragment | 9.77         | 8.16  |       |
| S5-final-viral-combined_k141_537001[full]   | 6581   | No  | NA | 8     | 0  | Low-quality    | Genome-fragment | 14.47        | 0     |       |
| S6-final-viral-combined_k141_1356491[full]  | 1346   | No  | NA | 0     | 0  | Not-determined | Genome-fragment | NA           | 0     |       |
| S6-final-viral-combined_k141_421411[full]   | 7428   | No  | NA | 0     | 2  | Not-determined | Genome-fragment | NA           | 0     |       |
| S6-final-viral-combined_k141_181721[full]   | 6776   | No  | NA | 0     | 4  | Not-determined | Genome-fragment | NA           | 0     |       |
| S6-final-viral-combined_k141_1005161[full]  | 1060   | No  | NA | 0     | 1  | Not-determined | Genome-fragment | NA           | 0     |       |
| S6-final-viral-combined_k141_229771[full]   | 3970   | No  | NA | 0     | 2  | Not-determined | Genome-fragment | NA           | 0     |       |
| S6-final-viral-combined_k141_181781[full]   | 2160   | No  | NA | 0     | 0  | Not-determined | Genome-fragment | NA           | 0     |       |
| S6-final-viral-combined_k141_597431[full]   | 5874   | No  | NA | 0     | 0  | Not-determined | Genome-fragment | NA           | 0     |       |
| S2-final-viral-combined_k141_749461[full]   | 6583   | No  | NA | 2     | 0  | Low-quality    | Genome-fragment | 10.82        | 0     |       |
| S6-final-viral-combined_k141_74441[full]    | 2379   | No  | NA | 0     | 2  | Not-determined | Genome-fragment | NA           | 0     |       |
| S4-final-viral-combined_k141_654411[full]   | 6587   | No  | NA | 4     | 0  | Low-quality    | Genome-fragment | 11.45        | 0     |       |
| S6-final-viral-combined_k141_829871[full]   | 19110  | No  | NA | 0     | 9  | Not-determined | Genome-fragment | NA           | 0     |       |
| S17-final-viral-combined_k141_710451[full]  | 6591   | Yes | NA | 4810  | 2  | Low-quality    | Genome-fragment | 7.03         | 27.02 |       |
| S1-final-viral-combined_k141_1983891[full]  | 6592   | Yes | NA | 5410  | 1  | Low-quality    | Genome-fragment | 6.63         | 17.93 |       |
| S6-final-viral-combined_k141_69441[full]    | 1308   | No  | NA | 0     | 0  | Not-determined | Genome-fragment | NA           | 0     |       |
| S11-final-viral-combined_k141_2946261[full] | 6595   | No  | NA | 0     | 0  | Low-quality    | Genome-fragment | 9.87         | 0     |       |
| S6-final-viral-combined_k141_126781[full]   | 10086  | No  | NA | 0     | 6  | Not-determined | Genome-fragment | NA           | 0     |       |
| S12-final-viral-combined_k141_2065131[full] | 6595   | No  | NA | 2     | 0  | Low-quality    | Genome-fragment | 20.46        | 0     |       |
| S6-final-viral-combined_k141_1123371[full]  | 1047   | No  | NA | 0     | 1  | Not-determined | Genome-fragment | NA           | 0     |       |
| S8_k141_35510                               | 6599   | No  | NA | 3     | 0  | Low-quality    | Genome-fragment | 12.46        | 0     |       |
| S6-final-viral-combined_k141_830071[full]   | 3206   | No  | NA | 0     | 2  | Not-determined | Genome-fragment | NA           | 0     |       |
| S6-final-viral-combined_k141_1123391[full]  | 6797   | No  | NA | 0     | 4  | Not-determined | Genome-fragment | NA           | 0     |       |
| S6-final-viral-combined_k141_1060911[full]  | 1789   | No  | NA | 0     | 2  | Not-determined | Genome-fragment | NA           | 0     |       |
| S5-final-viral-combined_k141_1373421[full]  | 6605   | No  | NA | 5     | 0  | Low-quality    | Genome-fragment | 14.29        | 0     |       |
| S6-final-viral-combined_k141_69851[full]    | 1726   | No  | NA | 0     | 0  | Not-determined | Genome-fragment | NA           | 0     |       |
| S17-final-viral-combined_k141_238801[full]  | 6605   | No  | NA | 0     | 2  | Low-quality    | Genome-fragment | 11.76        | 0     |       |
| S6-final-viral-combined_k141_534301[full]   | 2993   | No  | NA | 0     | 3  | Not-determined | Genome-fragment | NA           | 0     |       |
| S12_k141_315695                             | 6608   | No  | NA | 0     | 0  | Low-quality    | Genome-fragment | 11.53        | 0     |       |
| S6-final-viral-combined_k141_360001[full]   | 5303   | No  | NA | 0     | 5  | Not-determined | Genome-fragment | NA           | 0     |       |
| S6-final-viral-combined_k141_1067721[full]  | 2860   | No  | NA | 0     | 2  | Not-determined | Genome-fragment | NA           | 0     |       |
| S6-final-viral-combined_k141_360211[full]   | 1769   | No  | NA | 0     | 1  | Not-determined | Genome-fragment | NA           | 0     |       |
| S17-final-viral-combined_k141_945241[full]  | 6613   | No  | NA | 6     | 0  | Low-quality    | Genome-fragment | 15.74        | 0     |       |
| S8_k141_120922                              | 6619   | No  | NA | 0     | 0  | Low-quality    | Genome-fragment | 5.39         | 0     |       |
| S1_k141_148844                              | 6624   | No  | NA | 6     | 0  | Low-quality    | Genome-fragment | 13.96        | 0     |       |
| S6-final-viral-combined_k141_124261[full]   | 1446   | No  | NA | 0     | 0  | Not-determined | Genome-fragment | NA           | 0     |       |
| S8-final-viral-combined_k141_1383661[full]  | 6626   | No  | NA | 0     | 0  | Low-quality    | Genome-fragment | 16.16        | 0     |       |
| S6-final-viral-combined_k141_715411[full]   | 11121  | No  | NA | 0     | 6  | Not-determined | Genome-fragment | NA           | 0     |       |
| S6-final-viral-combined_k141_360701[full]   | 3707   | No  | NA | 0     | 1  | Not-determined | Genome-fragment | NA           | 0     |       |
| S6-final-viral-combined_k141_715461[full]   | 1232   | No  | NA | 0     | 1  | Not-determined | Genome-fragment | NA           | 0     |       |
| S6-final-viral-combined_k141_772221[full]   | 2034   | No  | NA | 0     | 0  | Not-determined | Genome-fragment | NA           | 0     |       |
| S6_k141_30410                               | 6627   | No  | NA | 5     | 0  | Low-quality    | Genome-fragment | 11.1         | 0     |       |
| S6-final-viral-combined_k141_1181591[full]  | 1491   | No  | NA | 0     | 1  | Not-determined | Genome-fragment | NA           | 0     |       |
| S6-final-viral-combined_k141_183131[full]   | 3270   | No  | NA | 0     | 2  | Not-determined | Genome-fragment | NA           | 0     |       |
| S6-final-viral-combined_k141_772441[full]   | 1380   | No  | NA | 0     | 2  | Not-determined | Genome-fragment | NA           | 0     |       |
| S6-final-viral-combined_k141_1244481[full]  | 1010   | No  | NA | 0     | 2  | Not-determined | Genome-fragment | NA           | 0     |       |
| S6-final-viral-combined_k141_1243451[full]  | 9976   | No  | NA | 0     | 7  | Not-determined | Genome-fragment | NA           | 0     |       |
| S8-final-viral-combined_k141_1145241[full]  | 6627   | No  | NA | 0     | 0  | Low-quality    | Genome-fragment | 19.21        | 0     |       |
| S1-final-viral-combined_k141_3255591[full]  | 6628   | No  | NA | 7     | 0  | Low-quality    | Genome-fragment | 12.67        | 0     |       |
| S9_k141_49380                               | 6629   | No  | NA | 0     | 3  | Low-quality    | Genome-fragment | 5.83         | 0     |       |
| S6-final-viral-combined_k141_127381[full]   | 1980   | No  | NA | 0     | 1  | Not-determined | Genome-fragment | NA           | 0     |       |
| S6-final-viral-combined_k141_1124751[full]  | 3949   | No  | NA | 0     | 0  | Not-determined | Genome-fragment | NA           | 0     |       |
| S6-final-viral-combined_k141_15161[full]    | 1910   | No  | NA | 0     | 2  | Not-determined | Genome-fragment | NA           | 0     |       |
| S6-final-viral-combined_k141_127471[full]   | 1166   | No  | NA | 0     | 0  | Not-determined | Genome-fragment | NA           | 0     |       |
| S6-final-viral-combined_k141_305101[full]   | 3753   | No  | NA | 0     | 4  | Not-determined | Genome-fragment | NA           | 0     |       |
| S6-final-viral-combined_k141_598881[full]   | 1112   | No  | NA | 0     | 0  | Not-determined | Genome-fragment | NA           | 0     |       |
| S6-final-viral-combined_k141_1838481[full]  | 1037   | No  | NA | 0     | 0  | Not-determined | Genome-fragment | NA           | 0     |       |
| S6-final-viral-combined_k141_952371[full]   | 3213   | No  | NA | 0     | 2  | Not-determined | Genome-fragment | NA           | 0     |       |
| S2-final-viral-combined_k141_363951[full]   | 6630   | No  | NA | 1     | 1  | Low-quality    | Genome-fragment | 12.62        | 0     |       |
| S5_k141_116840                              | 6632   | No  | NA | 0     | 0  | Low-quality    | Genome-fragment | 8.54         | 0     |       |
| S6-final-viral-combined_k141_305331[full]   | 1012   | No  | NA | 0     | 0  | Not-determined | Genome-fragment | NA           | 0     |       |
| S6-final-viral-combined_k141_772961[full]   | 2852   | No  | NA | 0     | 1  | Not-determined | Genome-fragment | NA           | 0     |       |
| S6-final-viral-combined_k141_1125211[full]  | 1131   | No  | NA | 0     | 2  | Not-determined | Genome-fragment | NA           | 0     |       |
| S9-final-viral-combined_k141_280411[full]   | 6633   | No  | NA | 0     | 1  | Low-quality    | Genome-fragment | 7.42         | 0     |       |
| S6-final-viral-combined_k141_305771[full]   | 1303   | No  | NA | 0     | 2  | Not-determined | Genome-fragment | NA           | 0     |       |
| S6-final-viral-combined_k141_481881[full]   | 2171   | No  | NA | 0     | 2  | Not-determined | Genome-fragment | NA           | 0     |       |
| S6-final-viral-combined_k141_535041[full]   | 6290   | No  | NA | 0     | 5  | Not-determined | Genome-fragment | NA           | 0     |       |
| S                                           |        |     |    |       |    |                |                 |              |       |       |



|                                       |        |        |     |       |    |    |                |                 |    |       |
|---------------------------------------|--------|--------|-----|-------|----|----|----------------|-----------------|----|-------|
| 56-final-viral-combined_k141_774851   | [full] | 1016   | No  | NA    | 0  | 1  | Not-determined | Genome-fragment | NA | 0     |
| 56-final-viral-combined_k141_186201   | [full] | 1558   | No  | NA    | 0  | 1  | Not-determined | Genome-fragment | NA | 0     |
| 56-final-viral-combined_k141_774921   | [full] | 3363   | No  | NA    | 0  | 2  | Not-determined | Genome-fragment | NA | 0     |
| 56-final-viral-combined_k141_186451   | [full] | 1288   | No  | NA    | 0  | 0  | Not-determined | Genome-fragment | NA | 0     |
| 59_k141_51735                         |        | 6671   | No  | NA    | 4  | 0  | Low-quality    | Genome-fragment | NA | 14.67 |
| 54-final-viral-combined_k141_153091   | [full] | 6674   | No  | NA    | 0  | 1  | Low-quality    | Genome-fragment | NA | 11.03 |
| 56-final-viral-combined_k141_100905   | [full] | 2044   | No  | NA    | 0  | 0  | Not-determined | Genome-fragment | NA | 0     |
| 55-final-viral-combined_k141_917031   | [full] | 6679   | No  | NA    | 5  | 0  | Low-quality    | Genome-fragment | NA | 18.27 |
| 56-final-viral-combined_k141_426441   | [full] | 1398   | No  | NA    | 0  | 1  | Not-determined | Genome-fragment | NA | 0     |
| 55_k141_35838                         |        | 6683   | No  | NA    | 4  | 0  | Low-quality    | Genome-fragment | NA | 10.51 |
| 512_k141_214950                       |        | 6684   | No  | NA    | 7  | 0  | Low-quality    | Genome-fragment | NA | 19.51 |
| 56-final-viral-combined_k141_307971   | [full] | 1474   | No  | NA    | 0  | 2  | Not-determined | Genome-fragment | NA | 0     |
| 56-final-viral-combined_k141_308001   | [full] | 1163   | No  | NA    | 0  | 2  | Not-determined | Genome-fragment | NA | 0     |
| 56-final-viral-combined_k141_130412   | [full] | 2873   | No  | NA    | 0  | 3  | Not-determined | Genome-fragment | NA | 0     |
| 56-final-viral-combined_k141_336941   | [full] | 7173   | No  | NA    | 0  | 2  | Not-determined | Genome-fragment | NA | 0     |
| 512-final-viral-combined_k141_279621  | [full] | 6686   | Yes | 3849  | 1  | 0  | Low-quality    | Genome-fragment | NA | 6.17  |
| 56-final-viral-combined_k141_100943   | [full] | 1375   | No  | NA    | 1  | 0  | Not-determined | Genome-fragment | NA | 0     |
| 56-final-viral-combined_k141_717171   | [full] | 1055   | No  | NA    | 0  | 0  | Not-determined | Genome-fragment | NA | 0     |
| 56-final-viral-combined_k141_308211   | [full] | 2170   | No  | NA    | 0  | 4  | Not-determined | Genome-fragment | NA | 0     |
| 517-final-viral-combined_k141_381581  | [full] | 6688   | No  | NA    | 1  | 0  | Low-quality    | Genome-fragment | NA | 15.2  |
| 56-final-viral-combined_k141_18251    | [full] | 1247   | No  | NA    | 0  | 1  | Not-determined | Genome-fragment | NA | 0     |
| 56-final-viral-combined_k141_235251   | [full] | 4154   | No  | NA    | 0  | 3  | Not-determined | Genome-fragment | NA | 0     |
| 56-final-viral-combined_k141_187711   | [full] | 2047   | No  | NA    | 0  | 3  | Not-determined | Genome-fragment | NA | 0     |
| 56-final-viral-combined_k141_187751   | [full] | 1813   | No  | NA    | 0  | 2  | Not-determined | Genome-fragment | NA | 0     |
| 512-final-viral-combined_k141_25641   | [full] | 6691   | No  | NA    | 1  | 0  | Low-quality    | Genome-fragment | NA | 17.39 |
| 53-final-viral-combined_k141_884651   | [full] | 6692   | No  | NA    | 0  | 6  | Low-quality    | Genome-fragment | NA | 6.28  |
| 56-final-viral-combined_k141_363761   | [full] | 2177   | No  | NA    | 0  | 1  | Not-determined | Genome-fragment | NA | 0     |
| 56-final-viral-combined_k141_537471   | [full] | 1395   | No  | NA    | 0  | 1  | Not-determined | Genome-fragment | NA | 0     |
| 56-final-viral-combined_k141_118471   | [full] | 175709 | Yes | 49596 | 23 | 91 | Complete       | High-quality    | NA | 100   |
| 56-final-viral-combined_k141_112725   | [full] | 1784   | No  | NA    | 0  | 1  | Not-determined | Genome-fragment | NA | 0     |
| 56-final-viral-combined_k141_19231    | [full] | 1115   | No  | NA    | 0  | 1  | Not-determined | Genome-fragment | NA | 0     |
| 55-final-viral-combined_k141_105621   | [full] | 6697   | No  | NA    | 0  | 0  | Low-quality    | Genome-fragment | NA | 7.65  |
| 56-final-viral-combined_k141_898251   | [full] | 1481   | No  | NA    | 0  | 1  | Not-determined | Genome-fragment | NA | 0     |
| 56_k141_24742                         |        | 6697   | No  | NA    | 1  | 1  | Low-quality    | Genome-fragment | NA | 3.63  |
| 56-final-viral-combined_k141_537711   | [full] | 2988   | No  | NA    | 0  | 3  | Not-determined | Genome-fragment | NA | 0     |
| 517_k141_9718                         |        | 6698   | No  | NA    | 0  | 1  | Low-quality    | Genome-fragment | NA | 3.6   |
| 56-final-viral-combined_k141_661461   | [full] | 1874   | No  | NA    | 0  | 1  | Not-determined | Genome-fragment | NA | 0     |
| 56-final-viral-combined_k141_130711   | [full] | 1106   | No  | NA    | 0  | 0  | Not-determined | Genome-fragment | NA | 0     |
| 56-final-viral-combined_k141_1184841  | [full] | 1884   | No  | NA    | 1  | 1  | Medium-quality | Genome-fragment | NA | 55.01 |
| 56-final-viral-combined_k141_130911   | [full] | 3460   | No  | NA    | 0  | 2  | Not-determined | Genome-fragment | NA | 0     |
| 512-final-viral-combined_k141_131261  | [full] | 6699   | No  | NA    | 0  | 1  | Low-quality    | Genome-fragment | NA | 10.54 |
| 56-final-viral-combined_k141_309881   | [full] | 1919   | No  | NA    | 0  | 2  | Not-determined | Genome-fragment | NA | 0     |
| 56-final-viral-combined_k141_1305871  | [full] | 1757   | No  | NA    | 0  | 3  | Not-determined | Genome-fragment | NA | 0     |
| 58-final-viral-combined_k141_190591   | [full] | 6699   | No  | NA    | 5  | 0  | Low-quality    | Genome-fragment | NA | 16.66 |
| 512-final-viral-combined_k141_2939131 | [full] | 6704   | Yes | 3596  | 1  | 1  | Low-quality    | Genome-fragment | NA | 2.46  |
| 53_k141_335776                        |        | 6708   | No  | NA    | 1  | 3  | Low-quality    | Genome-fragment | NA | 10.15 |
| 56-final-viral-combined_k141_130612   | [full] | 1235   | No  | NA    | 0  | 1  | Not-determined | Genome-fragment | NA | 0     |
| 56-final-viral-combined_k141_124685   | [full] | 1040   | No  | NA    | 0  | 1  | Not-determined | Genome-fragment | NA | 0     |
| 56-final-viral-combined_k141_1300151  | [full] | 5341   | No  | NA    | 0  | 2  | Not-determined | Genome-fragment | NA | 0     |
| 56-final-viral-combined_k141_20611    | [full] | 1328   | No  | NA    | 0  | 2  | Not-determined | Genome-fragment | NA | 0     |
| 56-final-viral-combined_k141_112781   | [full] | 2111   | No  | NA    | 0  | 1  | Not-determined | Genome-fragment | NA | 0     |
| 56-final-viral-combined_k141_247231   | [full] | 1022   | No  | NA    | 0  | 0  | Not-determined | Genome-fragment | NA | 0     |
| 56-final-viral-combined_k141_20641    | [full] | 1639   | No  | NA    | 0  | 2  | Not-determined | Genome-fragment | NA | 0     |
| 56-final-viral-combined_k141_130653   | [full] | 2366   | No  | NA    | 0  | 1  | Not-determined | Genome-fragment | NA | 0     |
| 56-final-viral-combined_k141_20761    | [full] | 1775   | No  | NA    | 0  | 0  | Not-determined | Genome-fragment | NA | 0     |
| 56-final-viral-combined_k141_130658   | [full] | 2978   | No  | NA    | 0  | 2  | Not-determined | Genome-fragment | NA | 0     |
| 56-final-viral-combined_k141_178501   | [full] | 1313   | No  | NA    | 0  | 0  | Not-determined | Genome-fragment | NA | 0     |
| 56-final-viral-combined_k141_21051    | [full] | 2520   | No  | NA    | 0  | 2  | Not-determined | Genome-fragment | NA | 0     |
| 56-final-viral-combined_k141_957291   | [full] | 5414   | No  | NA    | 0  | 2  | Not-determined | Genome-fragment | NA | 0     |
| 58-final-viral-combined_k141_2064251  | [full] | 6708   | Yes | 5494  | 2  | 1  | Low-quality    | Genome-fragment | NA | 12.84 |
| 58_k141_2873                          |        | 6708   | No  | NA    | 2  | 0  | Low-quality    | Genome-fragment | NA | 15.7  |
| 56-final-viral-combined_k141_899391   | [full] | 3913   | No  | NA    | 0  | 1  | Not-determined | Genome-fragment | NA | 0     |
| 52-final-viral-combined_k141_24651    | [full] | 6709   | Yes | 1865  | 2  | 4  | Low-quality    | Genome-fragment | NA | 2.73  |
| 56-final-viral-combined_k141_132751   | [full] | 2675   | No  | NA    | 0  | 3  | Not-determined | Genome-fragment | NA | 0     |
| 56-final-viral-combined_k141_178751   | [full] | 11226  | No  | NA    | 3  | 8  | Not-determined | Genome-fragment | NA | 0     |
| 56-final-viral-combined_k141_31093    | [full] | 13254  | No  | NA    | 0  | 5  | Not-determined | Genome-fragment | NA | 0     |
| 56-final-viral-combined_k141_777291   | [full] | 7527   | No  | NA    | 0  | 7  | Not-determined | Genome-fragment | NA | 0     |
| 58-final-viral-combined_k141_2593261  | [full] | 6710   | No  | NA    | 0  | 3  | Low-quality    | Genome-fragment | NA | 14.08 |
| 56-final-viral-combined_k141_718801   | [full] | 1599   | No  | NA    | 0  | 1  | Not-determined | Genome-fragment | NA | 0     |
| 55_k141_111346                        |        | 6711   | No  | NA    | 6  | 0  | Low-quality    | Genome-fragment | NA | 16.58 |
| 56-final-viral-combined_k141_60561    | [full] | 2421   | No  | NA    | 0  | 0  | Not-determined | Genome-fragment | NA | 0     |
| 56-final-viral-combined_k141_1186001  | [full] | 1610   | No  | NA    | 0  | 1  | Not-determined | Genome-fragment | NA | 0     |
| 56-final-viral-combined_k141_132861   | [full] | 1615   | No  | NA    | 0  | 0  | Not-determined | Genome-fragment | NA | 0     |
| 56-final-viral-combined_k141_605871   | [full] | 1522   | No  | NA    | 0  | 2  | Not-determined | Genome-fragment | NA | 0     |
| 56-final-viral-combined_k141_777721   | [full] | 4857   | No  | NA    | 0  | 4  | Not-determined | Genome-fragment | NA | 0     |
| 59_k141_71736                         |        | 6716   | No  | NA    | 0  | 0  | Low-quality    | Genome-fragment | NA | 2.5   |
| 56-final-viral-combined_k141_130736   | [full] | 12831  | No  | NA    | 0  | 6  | Not-determined | Genome-fragment | NA | 0     |
| 56-final-viral-combined_k141_107401   | [full] | 3096   | No  | NA    | 0  | 3  | Not-determined | Genome-fragment | NA | 0     |
| 56-final-viral-combined_k141_1362371  | [full] | 2025   | No  | NA    | 0  | 1  | Not-determined | Genome-fragment | NA | 0     |
| 56-final-viral-combined_k141_366991   | [full] | 2317   | No  | NA    | 0  | 0  | Not-determined | Genome-fragment | NA | 0     |
| 54-final-viral-combined_k141_480961   | [full] | 6719   | No  | NA    | 6  | 0  | Low-quality    | Genome-fragment | NA | 14.2  |
| 56-final-viral-combined_k141_1361451  | [full] | 1364   | No  | NA    | 0  | 1  | Not-determined | Genome-fragment | NA | 0     |
| 56-final-viral-combined_k141_133081   | [full] | 9762   | No  | NA    | 0  | 3  | Not-determined | Genome-fragment | NA | 0     |
| 512-final-viral-combined_k141_1884071 | [full] | 6723   | No  | NA    | 4  | 0  | Low-quality    | Genome-fragment | NA | 16.43 |
| 512-final-viral-combined_k141_2422981 | [full] | 6724   | No  | NA    | 0  | 1  | Low-quality    | Genome-fragment | NA | 15.72 |
| 511-final-viral-combined_k141_3002831 | [full] | 6725   | No  | NA    | 2  | 0  | Low-quality    | Genome-fragment | NA | 14.35 |
| 56-final-viral-combined_k141_134863   | [full] | 6729   | No  | NA    | 1  | 4  | Low-quality    | Genome-fragment | NA | 3.72  |
| 56-final-viral-combined_k141_719401   | [full] | 2391   | No  | NA    | 0  | 1  | Not-determined | Genome-fragment | NA | 0     |
| 56-final-viral-combined_k141_130791   | [full] | 2203   | No  | NA    | 0  | 2  | Not-determined | Genome-fragment | NA | 0     |
| 56-final-viral-combined_k141_311931   | [full] | 1097   | No  | NA    | 0  | 0  | Not-determined | Genome-fragment | NA | 0     |
| 55-final-viral-combined_k141_28561    | [full] | 6733   | No  | NA    | 4  | 0  | Low-quality    | Genome-fragment | NA | 14.46 |
| 56-final-viral-combined_k141_958461   | [full] | 1964   | No  | NA    | 0  | 0  | Not-determined | Genome-fragment | NA | 0     |
| 56-final-viral-combined_k141_719871   | [full] | 2236   | No  | NA    | 0  | 1  | Not-determined | Genome-fragment | NA | 0     |
| 511_k141_327067                       |        | 6734   | No  | NA    | 1  | 0  | Low-quality    | Genome-fragment | NA | 14.71 |
| 57-final-viral-combined_k141_952051   | [full] | 6737   | No  | NA    | 0  | 1  | Low-quality    | Genome-fragment | NA | 4.96  |
| 56-final-viral-combined_k141_430311   | [full] | 2003   | No  | NA    | 0  | 1  | Not-determined | Genome-fragment | NA | 0     |
| 52-final-viral-combined_k141_157887   | [full] | 6739   | No  | NA    | 4  | 0  | Low-quality    | Genome-fragment | NA | 13.53 |
| 56-final-viral-combined_k141_88501    | [full] | 1333   | No  | NA    | 0  | 1  | Not-determined | Genome-fragment | NA | 0     |
| 59-final-viral-combined_k141_1172441  | [full] | 6744   | No  | NA    | 0  | 1  | Low-quality    | Genome-fragment | NA | 7.51  |
| 56-final-viral-combined_k141_134231   | [full] | 1564   | No  | NA    | 0  | 0  | Not-determined | Genome-fragment | NA | 0     |
| 56-final-viral-combined_k141_77813    | [full] | 6351   | No  | NA    | 0  | 3  | Not-determined | Genome-fragment | NA | 0     |
| 59-final-viral-combined_k141_3493461  | [full] | 6746   | No  | NA    | 0  | 0  | Low-quality    | Genome-fragment | NA | 16.28 |
| 57-final-viral-combined_k141_839451   | [full] | 6746   | No  | NA    | 0  | 3  | Low-quality    | Genome-fragment | NA | 12.53 |
| 58-final-viral-combined_k141_255214   | [full] | 6748   | No  | NA    | 0  | 1  | Low-quality    | Genome-fragment | NA | 15.42 |
| 56-final-viral-combined_k141_113057   | [full] | 2062   | No  | NA    | 0  | 1  | Not-determined | Genome-fragment | NA | 0     |
| 56-final-viral-combined_k141_134941   | [full] | 5282   | No  | NA    | 0  | 2  | Not-determined | Genome-fragment | NA | 0     |
| 56-final-viral-combined_k141_249271   | [full] | 1742   | No  | NA    | 0  | 1  | Not-determined | Genome-fragment | NA | 0     |
| 56-final-viral-combined_k141_72082    | [full] | 1863   | No  | NA    | 0  | 0  | Not-determined | Genome-fragment | NA | 0     |
| 56-final-viral-combined_k141_507491   | [full] | 2928   | No  | NA    | 0  | 2  | Not-determined | Genome-fragment | NA | 0     |
| 56-final-viral-combined_k141_431391   | [full] | 1510   | No  | NA    | 0  | 1  | Not-determined | Genome-fragment | NA | 0     |
| 56-final-viral-combined_k141_136430   | [full] | 1367   | No  | NA    | 0  | 1  | Not-determined | Genome-fragment | NA | 0     |
| 56-final-viral-combined_k141_123271   | [full] | 1916   | No  | NA    | 0  | 1  | Not-determined | Genome-fragment | NA | 0     |
| 56-final-viral-combined_k141_1364341  | [full] | 1622   | No  | NA    | 0  | 0  | Not-determined | Genome-fragment | NA | 0     |
| 56-final-viral-combined_k141_249451   | [full] | 1438   | No  | NA    | 0  | 0  | Not-determined | Genome-fragment | NA | 0     |
| 53-final-viral-combined_k141_188991   | [full] | 6750   | No  | NA    | 0  | 1  | Low-quality    | Genome-fragment | NA | 6.49  |
| 56-final-viral-combined_k141_958841   | [full] | 4505   | No  | NA    | 0  | 4  | Not-determined | Genome-fragment | NA | 0     |
| 56-final-viral-combined_k141_1364651  | [full] | 1516   | No  | NA    | 0  | 0  | Not-determined | Genome-fragment | NA | 0     |
| 56-final-viral-combined_k141_2598081  | [full] | 2149   | No  | NA    | 0  | 0  | Not-determined | Genome-fragment | NA | 0     |
| 517-final-viral-combined_k141_254981  | [full] | 6750   | No  | NA    | 6  | 0  | Low-quality    | Genome-fragment | NA | 15.58 |
| 511_k141_14066                        |        | 6751   | No  | NA    | 0  | 5  | Low-quality    | Genome-fragment | NA | 22.37 |
| 56-final-viral-combined_k141_959191   | [full] | 5589   | No  | NA    | 0  | 4  | Not-determined | Genome-fragment | NA | 0     |
| 56-final-viral-combined_k141_1249731  | [full] | 1712   | No  | NA    | 0  | 0  | Not-determined | Genome-fragment | NA | 0     |
| 56-final-viral-combined_k141_75961    | [full] | 2489   | No  | NA    | 0  | 1  | Not-determined | Genome-fragment | NA | 0     |
| 56-final-viral-combined_k141_313711   | [full] | 6853   | No  | NA    | 0  | 5  | Not-determined | Genome-fragment | NA | 0     |
| 56_k141_28193                         |        | 6751   | No  | NA    | 2  | 0  | Low-quality    | Genome-fragment | NA | 15.71 |
| 56-final-viral-combined_k141_250091   | [full] | 2973   | No  | NA    | 0  | 3  | Not-determined | Genome-fragment | NA | 0     |
| 56-final-viral-combined_k141_136551   | [full] | 1586   | No  | NA    | 0  | 2  | Not-determined | Genome-fragment | NA | 0     |
| 56-final-viral-combined_k141_369641   | [full] | 3580   | No  | NA    | 0  | 2  | Not-determined | Genome-fragment | NA | 0     |
| 56-final-viral-combined_k141_1131671  |        |        |     |       |    |    |                |                 |    |       |



|                                      |       |     |    |      |    |                |                 |                 |       |       |
|--------------------------------------|-------|-----|----|------|----|----------------|-----------------|-----------------|-------|-------|
| 512_k141_252041                      | 6789  | No  | NA | 0    | 2  | Low-quality    | Genome-fragment | 6.67            | 0     |       |
| 56-final-viral-combined_k141_101175  | 1829  | No  | NA | 0    | 0  | Not-determined | Genome-fragment | NA              | 0     |       |
| 56-final-viral-combined_k141_131064  | 2453  | No  | NA | 0    | 0  | Not-determined | Genome-fragment | NA              | 0     |       |
| 56-final-viral-combined_k141_60987   | 6200  | No  | NA | 0    | 4  | Not-determined | Genome-fragment | NA              | 0     |       |
| 57-final-viral-combined_k141_83974   | 6791  | Yes | NA | 2    | 4  | Low-quality    | Genome-fragment | 2.71            | 54.35 |       |
| 56-final-viral-combined_k141_2721    | 2527  | No  | NA | 0    | 2  | Not-determined | Genome-fragment | NA              | 0     |       |
| 56-final-viral-combined_k141_19053   | 2048  | No  | NA | 0    | 1  | Not-determined | Genome-fragment | NA              | 0     |       |
| 56-final-viral-combined_k141_84033   | 1882  | No  | NA | 0    | 1  | Not-determined | Genome-fragment | NA              | 0     |       |
| 51_k141_161854                       | 6795  | No  | NA | 8    | 0  | Low-quality    | Genome-fragment | 14.36           | 0     |       |
| 56-final-viral-combined_k141_31609   | 2674  | No  | NA | 0    | 1  | Not-determined | Genome-fragment | NA              | 0     |       |
| 56-final-viral-combined_k141_54294   | 3597  | No  | NA | 0    | 2  | Not-determined | Genome-fragment | NA              | 0     |       |
| 56-final-viral-combined_k141_37283   | 1694  | No  | NA | 0    | 2  | Not-determined | Genome-fragment | NA              | 0     |       |
| 56-final-viral-combined_k141_31636   | 1633  | No  | NA | 0    | 2  | Not-determined | Genome-fragment | NA              | 0     |       |
| 512_k141_250015                      | 6796  | No  | NA | 0    | 5  | Low-quality    | Genome-fragment | 15.18           | 0     |       |
| 56-final-viral-combined_k141_130071  | 2955  | No  | NA | 18   | 0  | Medium-quality | Genome-fragment | 71.5            | 0     |       |
| 56-final-viral-combined_k141_61041   | 4914  | No  | NA | 0    | 2  | Not-determined | Genome-fragment | NA              | 0     |       |
| 54-final-viral-combined_k141_161277  | 6796  | No  | NA | 1    | 0  | Low-quality    | Genome-fragment | 44.13           | 0     |       |
| 54_k141_79869                        | 6797  | No  | NA | 0    | 1  | Low-quality    | Genome-fragment | 7.17            | 0     |       |
| 511-final-viral-combined_k141_279164 | 6798  | No  | NA | 1    | 0  | Low-quality    | Genome-fragment | 4.58            | 0     |       |
| 59-final-viral-combined_k141_97394   | 6799  | No  | NA | 7    | 0  | Low-quality    | Genome-fragment | 13.88           | 0     |       |
| 56-final-viral-combined_k141_31700   | 1328  | No  | NA | 0    | 1  | Not-determined | Genome-fragment | NA              | 0     |       |
| 58-final-viral-combined_k141_81804   | 6799  | No  | NA | 1    | 0  | Low-quality    | Genome-fragment | 10.66           | 0     |       |
| 56-final-viral-combined_k141_66939   | 1857  | No  | NA | 0    | 0  | Not-determined | Genome-fragment | NA              | 0     |       |
| 56-final-viral-combined_k141_25253   | 1366  | No  | NA | 0    | 2  | Not-determined | Genome-fragment | NA              | 0     |       |
| 56-final-viral-combined_k141_43571   | 1699  | No  | NA | 0    | 2  | Not-determined | Genome-fragment | NA              | 0     |       |
| 56-final-viral-combined_k141_78155   | 4855  | No  | NA | 0    | 2  | Not-determined | Genome-fragment | NA              | 0     |       |
| 56-final-viral-combined_k141_78144   | 2336  | No  | NA | 0    | 1  | Not-determined | Genome-fragment | NA              | 0     |       |
| 511-final-viral-combined_k141_235827 | 6801  | No  | NA | 0    | 5  | Low-quality    | Genome-fragment | 5.53            | 0     |       |
| 56-final-viral-combined_k141_7958    | 1404  | No  | NA | 2    | 2  | Not-determined | Genome-fragment | NA              | 0     |       |
| 511-final-viral-combined_k141_214464 | 6802  | No  | NA | 4    | 0  | Low-quality    | Genome-fragment | 13.05           | 0     |       |
| 512-final-viral-combined_k141_4061   | 6809  | No  | NA | 4    | 0  | Low-quality    | Genome-fragment | 19.02           | 0     |       |
| 56-final-viral-combined_k141_78158   | 7710  | No  | NA | 3    | 2  | Not-determined | Genome-fragment | NA              | 0     |       |
| 56-final-viral-combined_k141_19149   | 4332  | No  | NA | 0    | 4  | Not-determined | Genome-fragment | NA              | 0     |       |
| 51_k141_131012                       | 6811  | No  | NA | 1    | 0  | Low-quality    | Genome-fragment | 5.47            | 0     |       |
| 512-final-viral-combined_k141_87967  | 6813  | No  | NA | 6    | 0  | Low-quality    | Genome-fragment | 15.28           | 0     |       |
| 56-final-viral-combined_k141_101340  | 3411  | No  | NA | 0    | 2  | Not-determined | Genome-fragment | NA              | 0     |       |
| 52_k141_86684                        | 6813  | No  | NA | 2    | 1  | Low-quality    | Genome-fragment | 5.73            | 0     |       |
| 56-final-viral-combined_k141_2914    | 1515  | No  | NA | 0    | 1  | Not-determined | Genome-fragment | NA              | 0     |       |
| 56-final-viral-combined_k141_72460   | 53610 | No  | NA | 0    | 13 | Not-determined | Genome-fragment | NA              | 0     |       |
| 56-final-viral-combined_k141_72462   | 8159  | No  | NA | 0    | 0  | Not-determined | Genome-fragment | NA              | 0     |       |
| 52-final-viral-combined_k141_35435   | 6824  | No  | NA | 4    | 0  | Low-quality    | Genome-fragment | 18.69           | 0     |       |
| 56-final-viral-combined_k141_25389   | 1629  | No  | NA | 0    | 2  | Not-determined | Genome-fragment | NA              | 0     |       |
| 56-final-viral-combined_k141_2968    | 2541  | No  | NA | 0    | 1  | Not-determined | Genome-fragment | NA              | 0     |       |
| 56-final-viral-combined_k141_72468   | 1590  | No  | NA | 0    | 1  | Not-determined | Genome-fragment | NA              | 0     |       |
| 56-final-viral-combined_k141_96320   | 1544  | No  | NA | 0    | 1  | Not-determined | Genome-fragment | NA              | 0     |       |
| 56-final-viral-combined_k141_30377   | 1131  | No  | NA | 0    | 1  | Not-determined | Genome-fragment | NA              | 0     |       |
| 56-final-viral-combined_k141_2999    | 3079  | No  | NA | 0    | 2  | Not-determined | Genome-fragment | NA              | 0     |       |
| 56-final-viral-combined_k141_90388   | 4420  | No  | NA | 0    | 1  | Not-determined | Genome-fragment | NA              | 0     |       |
| 59_k141_120591                       | 6826  | No  | NA | 0    | 1  | Low-quality    | Genome-fragment | 5.53            | 0     |       |
| 53_k141_100237                       | 6832  | No  | NA | 0    | 0  | Low-quality    | Genome-fragment | 3.15            | 0     |       |
| 512-final-viral-combined_k141_297984 | 6833  | No  | NA | 0    | 0  | Low-quality    | Genome-fragment | 7.12            | 0     |       |
| 56-final-viral-combined_k141_113502  | 1863  | No  | NA | 0    | 2  | Not-determined | Genome-fragment | NA              | 0     |       |
| 512_k141_173422                      | 6833  | No  | NA | 0    | 4  | Low-quality    | Genome-fragment | 3.68            | 0     |       |
| 53-final-viral-combined_k141_122102  | 6841  | No  | NA | 0    | 1  | Low-quality    | Genome-fragment | 7.89            | 0     |       |
| 512-final-viral-combined_k141_95302  | 6842  | No  | NA | 9    | 0  | Low-quality    | Genome-fragment | 17.07           | 0     |       |
| 56-final-viral-combined_k141_72558   | 1343  | No  | NA | 0    | 1  | Not-determined | Genome-fragment | NA              | 0     |       |
| 56-final-viral-combined_k141_37583   | 2921  | No  | NA | 0    | 3  | Not-determined | Genome-fragment | NA              | 0     |       |
| 56-final-viral-combined_k141_90408   | 28400 | No  | NA | 0    | 14 | Not-determined | Genome-fragment | NA              | 0     |       |
| 56-final-viral-combined_k141_119138  | 61583 | Yes | NA | 23   | 19 | Medium-quality | Genome-fragment | 54.9            | 47.29 |       |
| 51-final-viral-combined_k141_203367  | 6846  | No  | NA | 3    | 0  | Low-quality    | Genome-fragment | 4.53            | 0     |       |
| 56-final-viral-combined_k141_3071    | 4290  | No  | NA | 0    | 1  | Not-determined | Genome-fragment | NA              | 0     |       |
| 56-final-viral-combined_k141_96386   | 3597  | No  | NA | 0    | 1  | Not-determined | Genome-fragment | NA              | 0     |       |
| 53-final-viral-combined_k141_54496   | 6847  | No  | NA | 0    | 6  | Low-quality    | Genome-fragment | 3.83            | 0     |       |
| 56-final-viral-combined_k141_113571  | 1948  | No  | NA | 0    | 2  | Not-determined | Genome-fragment | NA              | 0     |       |
| 56-final-viral-combined_k141_108059  | 3736  | No  | NA | 0    | 3  | Not-determined | Genome-fragment | NA              | 0     |       |
| 56-final-viral-combined_k141_78340   | 4351  | No  | NA | 0    | 3  | Not-determined | Genome-fragment | NA              | 0     |       |
| 56-final-viral-combined_k141_108064  | 6289  | No  | NA | 0    | 4  | Not-determined | Genome-fragment | NA              | 0     |       |
| 511_k141_151732                      | 6848  | No  | NA | 0    | 2  | Low-quality    | Genome-fragment | 6.33            | 0     |       |
| 56-final-viral-combined_k141_84278   | 1445  | No  | NA | 0    | 1  | Not-determined | Genome-fragment | NA              | 0     |       |
| 56-final-viral-combined_k141_19364   | 13300 | No  | NA | 0    | 1  | Not-determined | Genome-fragment | NA              | 0     |       |
| 517-final-viral-combined_k141_227640 | 6858  | No  | NA | 0    | 2  | Low-quality    | Genome-fragment | 3.69            | 0     |       |
| 56-final-viral-combined_k141_36437   | 3950  | No  | NA | 0    | 1  | Not-determined | Genome-fragment | NA              | 0     |       |
| 54-final-viral-combined_k141_44054   | 6860  | No  | NA | 0    | 1  | Low-quality    | Genome-fragment | 12.67           | 0     |       |
| 56-final-viral-combined_k141_90524   | 6227  | No  | NA | 0    | 2  | Not-determined | Genome-fragment | NA              | 0     |       |
| 511-final-viral-combined_k141_231084 | 6861  | No  | NA | 5    | 1  | Low-quality    | Genome-fragment | 3.46            | 0     |       |
| 56-final-viral-combined_k141_108096  | 1739  | No  | NA | 0    | 1  | Not-determined | Genome-fragment | NA              | 0     |       |
| 56-final-viral-combined_k141_31854   | 1338  | No  | NA | 0    | 0  | Not-determined | Genome-fragment | NA              | 0     |       |
| 58-final-viral-combined_k141_210709  | 6861  | No  | NA | 0    | 0  | Low-quality    | Genome-fragment | 6.94            | 0     |       |
| 56-final-viral-combined_k141_37751   | 7184  | No  | NA | 0    | 2  | Not-determined | Genome-fragment | NA              | 0     |       |
| 58_k141_237380                       | 6861  | No  | NA | 3    | 0  | Low-quality    | Genome-fragment | 13.95           | 0     |       |
| 56-final-viral-combined_k141_49582   | 2552  | No  | NA | 0    | 2  | Not-determined | Genome-fragment | NA              | 0     |       |
| 56-final-viral-combined_k141_194616  | 3002  | No  | NA | 0    | 0  | Not-determined | Genome-fragment | NA              | 0     |       |
| 56-final-viral-combined_k141_119330  | 3675  | No  | NA | 0    | 2  | Not-determined | Genome-fragment | NA              | 0     |       |
| 512_k141_49556                       | 6862  | No  | NA | 0    | 1  | Low-quality    | Genome-fragment | 2.17            | 0     |       |
| 56-final-viral-combined_k141_90657   | 1877  | No  | NA | 0    | 2  | Not-determined | Genome-fragment | NA              | 0     |       |
| 56-final-viral-combined_k141_25708   | 19414 | No  | NA | 0    | 7  | Not-determined | Genome-fragment | NA              | 0     |       |
| 56-final-viral-combined_k141_119382  | 1511  | No  | NA | 0    | 0  | Not-determined | Genome-fragment | NA              | 0     |       |
| 56-final-viral-combined_k141_90686   | 1815  | No  | NA | 0    | 3  | Not-determined | Genome-fragment | NA              | 0     |       |
| 58_k141_231410                       | 6867  | No  | NA | 3    | 0  | Low-quality    | Genome-fragment | 5.24            | 0     |       |
| 56-final-viral-combined_k141_101641  | 3057  | No  | NA | 0    | 2  | Not-determined | Genome-fragment | NA              | 0     |       |
| 56-final-viral-combined_k141_131393  | 2395  | No  | NA | 0    | 0  | Not-determined | Genome-fragment | NA              | 0     |       |
| 56-final-viral-combined_k141_82171   | 2115  | No  | NA | 0    | 15 | Not-determined | Genome-fragment | NA              | 0     |       |
| 512-final-viral-combined_k141_138238 | 6868  | No  | NA | 0    | 3  | Low-quality    | Genome-fragment | 3.7             | 0     |       |
| 56-final-viral-combined_k141_137031  | 1813  | No  | NA | 0    | 2  | Not-determined | Genome-fragment | NA              | 0     |       |
| 512-final-viral-combined_k141_39071  | 6872  | No  | NA | 0    | 0  | Low-quality    | Genome-fragment | 6.74            | 0     |       |
| 56-final-viral-combined_k141_67371   | 1595  | No  | NA | 0    | 2  | Not-determined | Genome-fragment | NA              | 0     |       |
| 56-final-viral-combined_k141_101691  | 2007  | No  | NA | 0    | 1  | Not-determined | Genome-fragment | NA              | 0     |       |
| 56-final-viral-combined_k141_78911   | 1080  | No  | NA | 0    | 1  | Not-determined | Genome-fragment | NA              | 0     |       |
| 58_k141_19159                        | 6872  | No  | NA | 2    | 0  | Low-quality    | Genome-fragment | 9.55            | 0     |       |
| 56-final-viral-combined_k141_54693   | 5613  | No  | NA | 0    | 3  | Not-determined | Genome-fragment | NA              | 0     |       |
| 56-final-viral-combined_k141_14367   | 1112  | No  | NA | 0    | 0  | Not-determined | Genome-fragment | NA              | 0     |       |
| 56-final-viral-combined_k141_17960   | 16326 | No  | NA | 0    | 5  | Not-determined | Genome-fragment | NA              | 0     |       |
| 56-final-viral-combined_k141_54708   | 5827  | No  | NA | 0    | 3  | Not-determined | Genome-fragment | NA              | 0     |       |
| 51_k141_203650                       | 6878  | Yes | NA | 4035 | 3  | 2              | Low-quality     | Genome-fragment | 7.72  | 41.33 |
| 511-final-viral-combined_k141_190288 | 6883  | No  | NA | 4    | 0  | Low-quality    | Genome-fragment | 12.49           | 0     |       |
| 56-final-viral-combined_k141_14174   | 17997 | No  | NA | 0    | 7  | Not-determined | Genome-fragment | NA              | 0     |       |
| 56-final-viral-combined_k141_131507  | 5446  | No  | NA | 0    | 6  | Not-determined | Genome-fragment | NA              | 0     |       |
| 517-final-viral-combined_k141_24480  | 6886  | Yes | NA | 2769 | 1  | 2              | Low-quality     | Genome-fragment | 5.62  | 59.79 |
| 52-final-viral-combined_k141_231371  | 6889  | No  | NA | 2    | 0  | Low-quality    | Genome-fragment | 11.46           | 0     |       |
| 56-final-viral-combined_k141_90791   | 4494  | No  | NA | 0    | 5  | Not-determined | Genome-fragment | NA              | 0     |       |
| 512-final-viral-combined_k141_38043  | 6890  | No  | NA | 4    | 0  | Low-quality    | Genome-fragment | 11.42           | 0     |       |
| 511-final-viral-combined_k141_232083 | 6888  | No  | NA | 0    | 1  | Low-quality    | Genome-fragment | 16.08           | 0     |       |
| 56-final-viral-combined_k141_19629   | 2199  | No  | NA | 0    | 1  | Not-determined | Genome-fragment | NA              | 0     |       |
| 56-final-viral-combined_k141_2071    | 3526  | No  | NA | 0    | 1  | Not-determined | Genome-fragment | NA              | 0     |       |
| 517-final-viral-combined_k141_21344  | 6904  | No  | NA | 0    | 1  | Low-quality    | Genome-fragment | 3.72            | 0     |       |
| 56-final-viral-combined_k141_61496   | 1446  | No  | NA | 0    | 2  | Not-determined | Genome-fragment | NA              | 0     |       |
| 56-final-viral-combined_k141_38046   | 1288  | No  | NA | 0    | 2  | Not-determined | Genome-fragment | NA              | 0     |       |
| 56-final-viral-combined_k141_20094   | 1356  | No  | NA | 0    | 2  | Not-determined | Genome-fragment | NA              | 0     |       |
| 56-final-viral-combined_k141_72969   | 1178  | No  | NA | 0    | 1  | Not-determined | Genome-fragment | NA              | 0     |       |
| 58-final-viral-combined_k141_288594  | 6904  | Yes | NA | 2223 | 1  | 2              | Low-quality     | Genome-fragment | 2.69  | 67.8  |
| 56-final-viral-combined_k141_49909   | 28186 | No  | NA | 18   | 1  | Medium-quality | Genome-fragment | 82.47           | 0     |       |
| 56-final-viral-combined_k141_28461   | 3453  | No  | NA | 0    | 2  | Not-determined | Genome-fragment | NA              | 0     |       |
| 56-final-viral-combined_k141_48584   | 1041  | No  | NA | 0    | 0  | Not-determined | Genome-fragment | NA              | 0     |       |
| 56-final-viral-combined_k141_78658   | 2263  | No  | NA | 0    | 1  | Not-determined | Genome-fragment | NA              | 0     |       |
| 52-final-viral-combined_k141_131640  | 6909  | No  | NA | 0    | 0  | Low-quality    | Genome-fragment | 29.17           | 0     |       |
| 56-final-viral-combined_k141_119572  | 1472  | No  | NA | 0    | 1  | Not-determined | Genome-fragment | NA              | 0     |       |
| 53_k141_46401                        | 6911  | No  | NA | 1    | 1  | Low-quality    | Genome-fragment | 3.4             | 0     |       |
| 56-final-viral-combined_k141_137271  | 1639  | No  | NA | 0    | 0  | Not-determined | Genome-fragment | NA              | 0     |       |
| 56-final-viral-combined_k141_101827  | 2522  | No  | NA | 0    | 0  | Not-determined | Genome-fragment | NA              | 0     |       |
| 51-final-viral-combined_k141_11429   | 6912  | No  | NA | 1    | 0  | Low-quality    | Genome-fragment | 15.34           | 0     |       |
| 58-final-viral-combined_k141_74267   | 6913  | No  | NA | 0    | 0  | Low-quality    | Genome-fragment | 7.26            | 0     |       |
| 56-final-viral-combined_k141_19719   | 5340  | No  | NA | 0    | 4  | Not-determined | Genome-fragment | NA              | 0     |       |
| 56-final-viral-combined_k141_38123   | 1337  | No  | NA | 0    | 1  | Not-determined | Genome-fragment | NA              | 0     |       |
| 56-final-viral-combined_k141_61556   | 2279  | No  | NA | 0    | 3  | Not-determined | Genome-fragment | NA              | 0     |       |
| 56-final-viral-combined_k141_36895   | 5544  | No  | NA | 0    | 4  | Not-determined | Genome-fragment | NA              | 0     |       |
| 51-final-viral-combined_k141_267686  | 6920  | No  | NA | 8    | 1  | Low-quality    | Genome-fragment | 14.65           | 0     |       |
| 512_k141_129910                      | 6920  | No  | NA | 0    | 1  | Low-quality    | Genome-fragment | 14.7            | 0     |       |
| 512-final-viral-comb                 |       |     |    |      |    |                |                 |                 |       |       |



|                                      |        |       |     |       |    |    |                |                 |       |       |
|--------------------------------------|--------|-------|-----|-------|----|----|----------------|-----------------|-------|-------|
| S12-final-viral-combined_k141_270561 | [full] | 6945  | No  | NA    | 0  | 0  | Low-quality    | Genome-fragment | 11.86 | 0     |
| S6-final-viral-combined_k141_55090   | [full] | 1890  | No  | NA    | 0  | 5  | Not-determined | Genome-fragment | NA    | 0     |
| S6-final-viral-combined_k141_8452    | [full] | 1901  | No  | NA    | 0  | 1  | Not-determined | Genome-fragment | NA    | 0     |
| S11-final-viral-combined_k141_322692 | [full] | 6952  | Yes | 3320  | 3  | 3  | Low-quality    | Genome-fragment | 8.53  | 52.24 |
| S6-final-viral-combined_k141_9747    | [full] | 1485  | No  | NA    | 0  | 0  | Not-determined | Genome-fragment | NA    | 0     |
| S12_k141_122504                      |        | 6953  | No  | NA    | 9  | 1  | Low-quality    | Genome-fragment | 8.65  | 0     |
| S2-final-viral-combined_k141_40628   | [full] | 6956  | No  | NA    | 0  | 5  | Low-quality    | Genome-fragment | 1.74  | 0     |
| S5-final-viral-combined_k141_2541    | [full] | 6963  | No  | NA    | 0  | 4  | Low-quality    | Genome-fragment | 10.42 | 0     |
| S6-final-viral-combined_k141_12441   | [full] | 1455  | No  | NA    | 0  | 0  | Not-determined | Genome-fragment | NA    | 0     |
| S6-final-viral-combined_k141_84887   | [full] | 1612  | No  | NA    | 0  | 0  | Not-determined | Genome-fragment | NA    | 0     |
| S6-final-viral-combined_k141_97256   | [full] | 2854  | No  | NA    | 0  | 2  | Not-determined | Genome-fragment | NA    | 0     |
| S6-final-viral-combined_k141_26037   | [full] | 1947  | No  | NA    | 0  | 0  | Not-determined | Genome-fragment | NA    | 0     |
| S6-final-viral-combined_k141_55210   | [full] | 1992  | No  | NA    | 0  | 0  | Not-determined | Genome-fragment | NA    | 0     |
| S6-final-viral-combined_k141_8508    | [full] | 87084 | Yes | 3241  | 16 | 36 | Medium-quality | Genome-fragment | 72.28 | 62.75 |
| S2-final-viral-combined_k141_120293  | [full] | 6964  | No  | NA    | 3  | 0  | Low-quality    | Genome-fragment | 17.77 | 0     |
| S12-final-viral-combined_k141_24540  | [full] | 6965  | No  | NA    | 7  | 0  | Low-quality    | Genome-fragment | 11.39 | 0     |
| S6-final-viral-combined_k141_97296   | [full] | 1133  | No  | NA    | 0  | 1  | Not-determined | Genome-fragment | NA    | 0     |
| S6-final-viral-combined_k141_32506   | [full] | 1308  | No  | NA    | 0  | 0  | Not-determined | Genome-fragment | NA    | 0     |
| S12-final-viral-combined_k141_200841 | [full] | 6966  | No  | NA    | 0  | 0  | Low-quality    | Genome-fragment | 19.2  | 0     |
| S7-final-viral-combined_k141_70365   | [full] | 6968  | No  | NA    | 3  | 0  | Low-quality    | Genome-fragment | 14.83 | 0     |
| S6-final-viral-combined_k141_3949    | [full] | 7982  | No  | NA    | 0  | 5  | Not-determined | Genome-fragment | NA    | 0     |
| S6-final-viral-combined_k141_102369  | [full] | 6962  | No  | NA    | 0  | 4  | Not-determined | Genome-fragment | NA    | 0     |
| S6-final-viral-combined_k141_3967    | [full] | 2055  | No  | NA    | 0  | 1  | Not-determined | Genome-fragment | NA    | 0     |
| S12-final-viral-combined_k141_38315  | [full] | 6970  | Yes | 3939  | 1  | 4  | Low-quality    | Genome-fragment | 3.53  | 43.49 |
| S6-final-viral-combined_k141_44531   | [full] | 1579  | No  | NA    | 0  | 0  | Not-determined | Genome-fragment | NA    | 0     |
| S6-final-viral-combined_k141_108791  | [full] | 2989  | No  | NA    | 0  | 0  | Not-determined | Genome-fragment | NA    | 0     |
| S6-final-viral-combined_k141_38499   | [full] | 1646  | No  | NA    | 0  | 1  | Not-determined | Genome-fragment | NA    | 0     |
| S6-final-viral-combined_k141_52598   | [full] | 5220  | No  | NA    | 1  | 0  | Not-determined | Genome-fragment | NA    | 0     |
| S9-final-viral-combined_k141_8109    | [full] | 6971  | No  | NA    | 0  | 0  | Low-quality    | Genome-fragment | 14.97 | 0     |
| S6-final-viral-combined_k141_32530   | [full] | 46060 | Yes | 33901 | 17 | 4  | Medium-quality | Genome-fragment | 59.41 | 26.4  |
| S6-final-viral-combined_k141_26151   | [full] | 2380  | No  | NA    | 0  | 0  | Not-determined | Genome-fragment | NA    | 0     |
| S6-final-viral-combined_k141_126266  | [full] | 69368 | Yes | 38859 | 18 | 27 | Medium-quality | Genome-fragment | 74.68 | 43.98 |
| S9-final-viral-combined_k141_48156   | [full] | 6974  | No  | NA    | 0  | 5  | Low-quality    | Genome-fragment | 18.21 | 0     |
| S6-final-viral-combined_k141_102339  | [full] | 1926  | No  | NA    | 0  | 0  | Not-determined | Genome-fragment | NA    | 0     |
| S6-final-viral-combined_k141_20089   | [full] | 1491  | No  | NA    | 0  | 2  | Not-determined | Genome-fragment | NA    | 0     |
| S1-final-viral-combined_k141_280621  | [full] | 6975  | Yes | 5424  | 1  | 0  | Low-quality    | Genome-fragment | 4.35  | 22.24 |
| S2_k141_145306                       |        | 6982  | No  | NA    | 0  | 2  | Low-quality    | Genome-fragment | 6.49  | 0     |
| S6_k141_27955                        |        | 7001  | No  | NA    | 1  | 0  | Low-quality    | Genome-fragment | 5.03  | 0     |
| S9-final-viral-combined_k141_43275   | [full] | 7002  | No  | NA    | 5  | 0  | Low-quality    | Genome-fragment | 14.95 | 0     |
| S6-final-viral-combined_k141_132139  | [full] | 3067  | No  | NA    | 0  | 0  | Not-determined | Genome-fragment | NA    | 0     |
| S6-final-viral-combined_k141_85070   | [full] | 4529  | No  | NA    | 0  | 3  | Not-determined | Genome-fragment | NA    | 0     |
| S7-final-viral-combined_k141_227400  | [full] | 7003  | No  | NA    | 0  | 0  | Low-quality    | Genome-fragment | 14.17 | 0     |
| S6-final-viral-combined_k141_4097    | [full] | 7426  | No  | NA    | 0  | 6  | Not-determined | Genome-fragment | NA    | 0     |
| S8_k141_56441                        |        | 7006  | No  | NA    | 3  | 0  | Low-quality    | Genome-fragment | 7.42  | 0     |
| S11_k141_314598                      |        | 7007  | No  | NA    | 3  | 0  | Low-quality    | Genome-fragment | 14.51 | 0     |
| S6-final-viral-combined_k141_108928  | [full] | 2103  | No  | NA    | 0  | 0  | Not-determined | Genome-fragment | NA    | 0     |
| S12_k141_174158                      |        | 7014  | No  | NA    | 0  | 0  | Low-quality    | Genome-fragment | 11.63 | 0     |
| S6-final-viral-combined_k141_97502   | [full] | 3487  | No  | NA    | 0  | 0  | Not-determined | Genome-fragment | NA    | 0     |
| S11-final-viral-combined_k141_246557 | [full] | 7016  | No  | NA    | 0  | 0  | Low-quality    | Genome-fragment | 15.92 | 0     |
| S6-final-viral-combined_k141_120043  | [full] | 5603  | No  | NA    | 7  | 0  | Not-determined | Genome-fragment | NA    | 0     |
| S6-final-viral-combined_k141_97515   | [full] | 2516  | No  | NA    | 0  | 2  | Not-determined | Genome-fragment | NA    | 0     |
| S11-final-viral-combined_k141_187585 | [full] | 7016  | No  | NA    | 0  | 0  | Low-quality    | Genome-fragment | 2.88  | 0     |
| S3-final-viral-combined_k141_92639   | [full] | 7016  | No  | NA    | 0  | 4  | Low-quality    | Genome-fragment | 6.09  | 0     |
| S6-final-viral-combined_k141_26237   | [full] | 2250  | No  | NA    | 0  | 1  | Not-determined | Genome-fragment | NA    | 0     |
| S6-final-viral-combined_k141_26322   | [full] | 2655  | No  | NA    | 0  | 3  | Not-determined | Genome-fragment | NA    | 0     |
| S6-final-viral-combined_k141_20199   | [full] | 8617  | No  | NA    | 0  | 4  | Not-determined | Genome-fragment | NA    | 0     |
| S6-final-viral-combined_k141_97544   | [full] | 4509  | No  | NA    | 0  | 0  | Not-determined | Genome-fragment | NA    | 0     |
| S6-final-viral-combined_k141_132260  | [full] | 1391  | No  | NA    | 0  | 2  | Not-determined | Genome-fragment | NA    | 0     |
| S6-final-viral-combined_k141_120066  | [full] | 1151  | No  | NA    | 0  | 0  | Not-determined | Genome-fragment | NA    | 0     |
| S6-final-viral-combined_k141_73621   | [full] | 1567  | No  | NA    | 0  | 2  | Not-determined | Genome-fragment | NA    | 0     |
| S6-final-viral-combined_k141_88229   | [full] | 2790  | No  | NA    | 0  | 1  | Not-determined | Genome-fragment | NA    | 0     |
| S6-final-viral-combined_k141_82139   | [full] | 1102  | No  | NA    | 0  | 0  | Not-determined | Genome-fragment | NA    | 0     |
| S1-final-viral-combined_k141_354384  | [full] | 7018  | No  | NA    | 0  | 0  | Low-quality    | Genome-fragment | 6.94  | 0     |
| S6-final-viral-combined_k141_126482  | [full] | 7501  | No  | NA    | 0  | 6  | Not-determined | Genome-fragment | NA    | 0     |
| S12_k141_74627                       |        | 7019  | No  | NA    | 1  | 0  | Low-quality    | Genome-fragment | 10.62 | 0     |
| S6-final-viral-combined_k141_62217   | [full] | 2701  | No  | NA    | 0  | 0  | Not-determined | Genome-fragment | NA    | 0     |
| S6-final-viral-combined_k141_44679   | [full] | 1405  | No  | NA    | 0  | 1  | Not-determined | Genome-fragment | NA    | 0     |
| S6-final-viral-combined_k141_137806  | [full] | 22096 | No  | NA    | 0  | 15 | Not-determined | Genome-fragment | NA    | 0     |
| S4-final-viral-combined_k141_98644   | [full] | 7019  | No  | NA    | 0  | 0  | Low-quality    | Genome-fragment | 20.29 | 0     |
| S4-final-viral-combined_k141_154655  | [full] | 7022  | No  | NA    | 0  | 3  | Low-quality    | Genome-fragment | 7.73  | 0     |
| S4_k141_138226                       |        | 7025  | No  | NA    | 6  | 0  | Low-quality    | Genome-fragment | 19.28 | 0     |
| S6-final-viral-combined_k141_4275    | [full] | 2166  | No  | NA    | 0  | 3  | Not-determined | Genome-fragment | NA    | 0     |
| S6-final-viral-combined_k141_38778   | [full] | 1860  | No  | NA    | 0  | 0  | Not-determined | Genome-fragment | NA    | 0     |
| S6-final-viral-combined_k141_137846  | [full] | 2065  | No  | NA    | 0  | 2  | Not-determined | Genome-fragment | NA    | 0     |
| S17-final-viral-combined_k141_180981 | [full] | 7027  | No  | NA    | 6  | 0  | Low-quality    | Genome-fragment | 21.42 | 0     |
| S2_k141_156864                       |        | 7027  | No  | NA    | 1  | 1  | Low-quality    | Genome-fragment | 5.42  | 0     |
| S6-final-viral-combined_k141_102644  | [full] | 1240  | No  | NA    | 0  | 0  | Not-determined | Genome-fragment | NA    | 0     |
| S6-final-viral-combined_k141_73674   | [full] | 3262  | No  | NA    | 0  | 3  | Not-determined | Genome-fragment | NA    | 0     |
| S4_k141_118842                       |        | 7027  | No  | NA    | 3  | 0  | Low-quality    | Genome-fragment | 4.05  | 0     |
| S2-final-viral-combined_k141_202253  | [full] | 7028  | No  | NA    | 0  | 1  | Low-quality    | Genome-fragment | 4.26  | 0     |
| S6-final-viral-combined_k141_97616   | [full] | 4992  | No  | NA    | 0  | 5  | Not-determined | Genome-fragment | NA    | 0     |
| S6-final-viral-combined_k141_20369   | [full] | 6514  | No  | NA    | 0  | 2  | Not-determined | Genome-fragment | NA    | 0     |
| S12-final-viral-combined_k141_254754 | [full] | 7033  | No  | NA    | 1  | 4  | Low-quality    | Genome-fragment | 3.74  | 0     |
| S6-final-viral-combined_k141_126584  | [full] | 2854  | No  | NA    | 0  | 1  | Not-determined | Genome-fragment | NA    | 0     |
| S5-final-viral-combined_k141_104100  | [full] | 7034  | No  | NA    | 0  | 0  | Low-quality    | Genome-fragment | 4.35  | 0     |
| S6-final-viral-combined_k141_32743   | [full] | 1979  | No  | NA    | 0  | 2  | Not-determined | Genome-fragment | NA    | 0     |
| S6-final-viral-combined_k141_8845    | [full] | 1411  | No  | NA    | 0  | 0  | Not-determined | Genome-fragment | NA    | 0     |
| S6-final-viral-combined_k141_132360  | [full] | 3284  | No  | NA    | 0  | 1  | Not-determined | Genome-fragment | NA    | 0     |
| S6-final-viral-combined_k141_79276   | [full] | 1710  | No  | NA    | 0  | 0  | Not-determined | Genome-fragment | NA    | 0     |
| S5-final-viral-combined_k141_194204  | [full] | 7034  | No  | NA    | 0  | 0  | Low-quality    | Genome-fragment | 12.08 | 0     |
| S1_k141_375254                       |        | 7035  | No  | NA    | 5  | 0  | Low-quality    | Genome-fragment | 18.85 | 0     |
| S2-final-viral-combined_k141_158916  | [full] | 7038  | No  | NA    | 1  | 0  | Low-quality    | Genome-fragment | 11.72 | 0     |
| S6-final-viral-combined_k141_4408    | [full] | 2312  | No  | NA    | 0  | 2  | Not-determined | Genome-fragment | NA    | 0     |
| S6-final-viral-combined_k141_44770   | [full] | 2874  | No  | NA    | 0  | 2  | Not-determined | Genome-fragment | NA    | 0     |
| S2-final-viral-combined_k141_155751  | [full] | 7040  | No  | NA    | 0  | 1  | Low-quality    | Genome-fragment | 1.85  | 0     |
| S1-final-viral-combined_k141_225670  | [full] | 7041  | No  | NA    | 0  | 0  | Low-quality    | Genome-fragment | 16.75 | 0     |
| S6-final-viral-combined_k141_26481   | [full] | 1346  | No  | NA    | 0  | 1  | Not-determined | Genome-fragment | NA    | 0     |
| S6-final-viral-combined_k141_73722   | [full] | 6108  | No  | NA    | 0  | 5  | Not-determined | Genome-fragment | NA    | 0     |
| S17-final-viral-combined_k141_25340  | [full] | 7041  | No  | NA    | 0  | 0  | Low-quality    | Genome-fragment | 8.55  | 0     |
| S4-final-viral-combined_k141_105037  | [full] | 7044  | No  | NA    | 0  | 5  | Low-quality    | Genome-fragment | 4.22  | 0     |
| S6-final-viral-combined_k141_137951  | [full] | 9311  | No  | NA    | 0  | 6  | Not-determined | Genome-fragment | NA    | 0     |
| S6-final-viral-combined_k141_82410   | [full] | 5522  | No  | NA    | 0  | 0  | Not-determined | Genome-fragment | NA    | 0     |
| S6-final-viral-combined_k141_132432  | [full] | 1877  | No  | NA    | 0  | 1  | Not-determined | Genome-fragment | NA    | 0     |
| S6-final-viral-combined_k141_81348   | [full] | 1516  | No  | NA    | 0  | 0  | Not-determined | Genome-fragment | NA    | 0     |
| S6-final-viral-combined_k141_10479   | [full] | 2004  | No  | NA    | 0  | 0  | Not-determined | Genome-fragment | NA    | 0     |
| S11-final-viral-combined_k141_243184 | [full] | 7047  | No  | NA    | 3  | 0  | Low-quality    | Genome-fragment | 18.08 | 0     |
| S6-final-viral-combined_k141_8931    | [full] | 1877  | No  | NA    | 0  | 2  | Not-determined | Genome-fragment | NA    | 0     |
| S6-final-viral-combined_k141_87686   | [full] | 1132  | No  | NA    | 0  | 1  | Not-determined | Genome-fragment | NA    | 0     |
| S1-final-viral-combined_k141_123111  | [full] | 7048  | No  | NA    | 0  | 0  | Low-quality    | Genome-fragment | 3.83  | 0     |
| S6-final-viral-combined_k141_26523   | [full] | 1813  | No  | NA    | 0  | 0  | Not-determined | Genome-fragment | NA    | 0     |
| S6-final-viral-combined_k141_79354   | [full] | 6674  | No  | NA    | 0  | 4  | Not-determined | Genome-fragment | NA    | 0     |
| S6-final-viral-combined_k141_114741  | [full] | 4570  | No  | NA    | 0  | 1  | Not-determined | Genome-fragment | NA    | 0     |
| S6-final-viral-combined_k141_50513   | [full] | 2570  | No  | NA    | 0  | 1  | Not-determined | Genome-fragment | NA    | 0     |
| S12_k141_210447                      |        | 7048  | No  | NA    | 0  | 2  | Low-quality    | Genome-fragment | 6.22  | 0     |
| S5-final-viral-combined_k141_151552  | [full] | 7051  | No  | NA    | 0  | 0  | Low-quality    | Genome-fragment | 46.23 | 0     |
| S8-final-viral-combined_k141_73280   | [full] | 7052  | No  | NA    | 1  | 0  | Low-quality    | Genome-fragment | 12.25 | 0     |
| S11-final-viral-combined_k141_121054 | [full] | 7061  | No  | NA    | 1  | 0  | Low-quality    | Genome-fragment | 4.29  | 0     |
| S6-final-viral-combined_k141_39002   | [full] | 3445  | No  | NA    | 0  | 2  | Not-determined | Genome-fragment | NA    | 0     |
| S6-final-viral-combined_k141_126668  | [full] | 1579  | No  | NA    | 0  | 0  | Not-determined | Genome-fragment | NA    | 0     |
| S6-final-viral-combined_k141_55639   | [full] | 1032  | No  | NA    | 0  | 0  | Not-determined | Genome-fragment | NA    | 0     |
| S6-final-viral-combined_k141_114792  | [full] | 1036  | No  | NA    | 0  | 0  | Not-determined | Genome-fragment | NA    | 0     |
| S6-final-viral-combined_k141_78805   | [full] | 10643 | No  | NA    | 0  | 0  | Not-determined | Genome-fragment | NA    | 0     |
| S11_k141_174584                      |        | 7063  | No  | NA    | 0  | 0  | Low-quality    | Genome-fragment | 7.51  | 0     |
| S6-final-viral-combined_k141_7808    | [full] | 1268  | No  | NA    | 0  | 1  | Not-determined | Genome-fragment | NA    | 0     |
| S8-final-viral-combined_k141_210045  | [full] | 7063  | No  | NA    | 0  | 0  | Low-quality    | Genome-fragment | 20.26 | 0     |
| S11_k141_174285                      |        | 7066  | No  | NA    | 5  | 0  | Low-quality    | Genome-fragment | 19.53 | 0     |
| S6-final-viral-combined_k141_55675   | [full] | 3054  | No  | NA    | 0  | 2  | Not-determined | Genome-fragment | NA    | 0     |
| S6-final-viral-combined_k141_30021   | [full] | 1614  | No  | NA    | 0  | 0  | Not-determined | Genome-fragment | NA    | 0     |
| S12-final-viral-combined_k141_363300 | [full] | 7073  | No  | NA    | 0  | 0  | Low-quality    | Genome-fragment | 11.53 | 0     |
| S11-final-viral-combined_k141_328345 | [full] | 7074  | No  | NA    | 3  | 0  | Low-quality    | Genome-fragment |       |       |



|                                      |        |        |      |       |    |    |                |                 |    |       |
|--------------------------------------|--------|--------|------|-------|----|----|----------------|-----------------|----|-------|
| S6-final-viral-combined_k141_26829   | [full] | 2056   | No   | NA    | 0  | 1  | Not-determined | Genome-fragment | NA | 0     |
| S6-final-viral-combined_k141_21708   | [full] | 2223   | No   | NA    | 0  | 1  | Not-determined | Genome-fragment | NA | 0     |
| S7-final-viral-combined_k141_187556  | [full] | 7115   | No   | NA    | 7  | 0  | Low-quality    | Genome-fragment | NA | 17.57 |
| S6-final-viral-combined_k141_50721   | [full] | 132102 | Yes  | 37019 | 15 | 61 | Medium-quality | Genome-fragment | NA | 63.84 |
| S6-final-viral-combined_k141_91711   | [full] | 1089   | No   | NA    | 0  | 1  | Not-determined | Genome-fragment | NA | 0     |
| S8-final-viral-combined_k141_77045   | [full] | 7115   | No   | NA    | 2  | 0  | Low-quality    | Genome-fragment | NA | 18.4  |
| S11_k141_131843                      |        | 7121   | No   | NA    | 3  | 0  | Low-quality    | Genome-fragment | NA | 11.03 |
| S12-final-viral-combined_k141_58028  | [full] | 7121   | No   | NA    | 1  | 0  | Low-quality    | Genome-fragment | NA | 16.72 |
| S5_k141_87663                        |        | 7123   | No   | NA    | 0  | 0  | Low-quality    | Genome-fragment | NA | 4.62  |
| S1-final-viral-combined_k141_225074  | [full] | 7130   | No   | NA    | 4  | 0  | Low-quality    | Genome-fragment | NA | 15.57 |
| S6-final-viral-combined_k141_91768   | [full] | 3878   | No   | NA    | 0  | 2  | Not-determined | Genome-fragment | NA | 0     |
| S11-final-viral-combined_k141_12144  | [full] | 7133   | No   | NA    | 0  | 0  | Low-quality    | Genome-fragment | NA | 16.8  |
| S6-final-viral-combined_k141_115058  | [full] | 1278   | No   | NA    | 2  | 0  | Not-determined | Genome-fragment | NA | 0     |
| S6-final-viral-combined_k141_79664   | [full] | 1027   | No   | NA    | 0  | 2  | Not-determined | Genome-fragment | NA | 0     |
| S12-final-viral-combined_k141_357360 | [full] | 7134   | No   | NA    | 0  | 0  | Low-quality    | Genome-fragment | NA | 12.81 |
| S7_k141_108466                       |        | 7139   | No   | NA    | 3  | 0  | Low-quality    | Genome-fragment | NA | 2.11  |
| S6-final-viral-combined_k141_85854   | [full] | 2102   | No   | NA    | 0  | 1  | Not-determined | Genome-fragment | NA | 0     |
| S6-final-viral-combined_k141_74023   | [full] | 1354   | No   | NA    | 0  | 2  | Not-determined | Genome-fragment | NA | 0     |
| S6-final-viral-combined_k141_26952   | [full] | 3077   | No   | NA    | 0  | 2  | Not-determined | Genome-fragment | NA | 0     |
| S6-final-viral-combined_k141_74027   | [full] | 1411   | No   | NA    | 0  | 2  | Not-determined | Genome-fragment | NA | 0     |
| S6-final-viral-combined_k141_103108  | [full] | 2226   | No   | NA    | 0  | 1  | Not-determined | Genome-fragment | NA | 0     |
| S6-final-viral-combined_k141_126036  | [full] | 2122   | No   | NA    | 0  | 0  | Not-determined | Genome-fragment | NA | 0     |
| S12-final-viral-combined_k141_394230 | [full] | 7143   | No   | NA    | 1  | 0  | Low-quality    | Genome-fragment | NA | 17.31 |
| S6-final-viral-combined_k141_85883   | [full] | 4360   | No   | NA    | 0  | 4  | Not-determined | Genome-fragment | NA | 0     |
| S6_k141_25809                        |        | 7143   | No   | NA    | 0  | 0  | Low-quality    | Genome-fragment | NA | 11.84 |
| S4-final-viral-combined_k141_31990   | [full] | 7144   | No   | NA    | 3  | 0  | Low-quality    | Genome-fragment | NA | 12.02 |
| S1-final-viral-combined_k141_148159  | [full] | 7148   | No   | NA    | 3  | 0  | Low-quality    | Genome-fragment | NA | 12.59 |
| S7-final-viral-combined_k141_191294  | [full] | 7149   | No   | NA    | 0  | 3  | Low-quality    | Genome-fragment | NA | 2.69  |
| S6-final-viral-combined_k141_26952   | [full] | 1262   | No   | NA    | 0  | 1  | Not-determined | Genome-fragment | NA | 0     |
| S11-final-viral-combined_k141_210884 | [full] | 7151   | No   | NA    | 4  | 0  | Low-quality    | Genome-fragment | NA | 4.17  |
| S6-final-viral-combined_k141_115138  | [full] | 3599   | No   | NA    | 0  | 0  | Not-determined | Genome-fragment | NA | 0     |
| S6-final-viral-combined_k141_62924   | [full] | 3424   | No   | NA    | 0  | 2  | Not-determined | Genome-fragment | NA | 0     |
| S2_k141_5702                         |        | 7151   | No   | NA    | 2  | 0  | Low-quality    | Genome-fragment | NA | 8.78  |
| S6-final-viral-combined_k141_45284   | [full] | 1756   | No   | NA    | 0  | 0  | Not-determined | Genome-fragment | NA | 0     |
| S6-final-viral-combined_k141_27001   | [full] | 3708   | No   | NA    | 0  | 3  | Not-determined | Genome-fragment | NA | 0     |
| S11-final-viral-combined_k141_215631 | [full] | 7159   | No   | NA    | 0  | 0  | Low-quality    | Genome-fragment | NA | 3.23  |
| S8-final-viral-combined_k141_252857  | [full] | 7163   | No   | NA    | 3  | 0  | Low-quality    | Genome-fragment | NA | 16.32 |
| S6-final-viral-combined_k141_103188  | [full] | 1685   | No   | NA    | 0  | 0  | Not-determined | Genome-fragment | NA | 0     |
| S7-final-viral-combined_k141_235801  | [full] | 7167   | No   | NA    | 0  | 1  | Low-quality    | Genome-fragment | NA | 21.38 |
| S6-final-viral-combined_k141_45287   | [full] | 15259  | No   | NA    | 0  | 8  | Not-determined | Genome-fragment | NA | 0     |
| S6-final-viral-combined_k141_45289   | [full] | 2213   | No   | NA    | 0  | 0  | Not-determined | Genome-fragment | NA | 0     |
| S6-final-viral-combined_k141_33048   | [full] | 1583   | No   | NA    | 0  | 2  | Not-determined | Genome-fragment | NA | 0     |
| S6-final-viral-combined_k141_74117   | [full] | 1739   | No   | NA    | 0  | 1  | Not-determined | Genome-fragment | NA | 0     |
| S6-final-viral-combined_k141_79776   | [full] | 3440   | No   | NA    | 0  | 2  | Not-determined | Genome-fragment | NA | 0     |
| S6-final-viral-combined_k141_39320   | [full] | 1307   | No   | NA    | 0  | 0  | Not-determined | Genome-fragment | NA | 0     |
| S6-final-viral-combined_k141_13080   | [full] | 8183   | No   | NA    | 0  | 4  | Not-determined | Genome-fragment | NA | 0     |
| S6-final-viral-combined_k141_88201   | [full] | 17095  | No   | NA    | 0  | 11 | Not-determined | Genome-fragment | NA | 0     |
| S5-final-viral-combined_k141_170073  | [full] | 7168   | No   | NA    | 5  | 0  | Low-quality    | Genome-fragment | NA | 17.58 |
| S6_k141_94059                        |        | 7170   | No   | NA    | 0  | 4  | Low-quality    | Genome-fragment | NA | 3.86  |
| S6-final-viral-combined_k141_109578  | [full] | 1274   | No   | NA    | 0  | 2  | Not-determined | Genome-fragment | NA | 0     |
| S6-final-viral-combined_k141_79812   | [full] | 1445   | No   | NA    | 0  | 1  | Not-determined | Genome-fragment | NA | 0     |
| S12_k141_229570                      |        | 7172   | No   | NA    | 0  | 2  | Low-quality    | Genome-fragment | NA | 7.35  |
| S6-final-viral-combined_k141_103232  | [full] | 1461   | No   | NA    | 0  | 0  | Not-determined | Genome-fragment | NA | 0     |
| S8-final-viral-combined_k141_149891  | [full] | 7177   | No   | NA    | 6  | 0  | Low-quality    | Genome-fragment | NA | 18.02 |
| S6-final-viral-combined_k141_23312   | [full] | 7192   | No   | NA    | 4  | 0  | Not-determined | Genome-fragment | NA | 0     |
| S6-final-viral-combined_k141_155201  | [full] | 3038   | No   | NA    | 0  | 2  | Not-determined | Genome-fragment | NA | 0     |
| S17-final-viral-combined_k141_44329  | [full] | 7178   | No   | NA    | 1  | 0  | Low-quality    | Genome-fragment | NA | 38.37 |
| S11-final-viral-combined_k141_169750 | [full] | 7180   | No   | NA    | 2  | 0  | Low-quality    | Genome-fragment | NA | 15.72 |
| S6-final-viral-combined_k141_103777  | [full] | 4316   | No   | NA    | 0  | 2  | Not-determined | Genome-fragment | NA | 0     |
| S6_k141_118357                       |        | 7180   | No   | NA    | 0  | 0  | Low-quality    | Genome-fragment | NA | 8.52  |
| S7-final-viral-combined_k141_116042  | [full] | 7181   | No   | NA    | 0  | 6  | Low-quality    | Genome-fragment | NA | 5.75  |
| S6-final-viral-combined_k141_27114   | [full] | 1025   | No   | NA    | 0  | 0  | Not-determined | Genome-fragment | NA | 0     |
| S6-final-viral-combined_k141_127060  | [full] | 2580   | No   | NA    | 0  | 1  | Not-determined | Genome-fragment | NA | 0     |
| S6-final-viral-combined_k141_74204   | [full] | 1456   | No   | NA    | 0  | 1  | Not-determined | Genome-fragment | NA | 0     |
| S6-final-viral-combined_k141_39459   | [full] | 2439   | No   | NA    | 0  | 2  | Not-determined | Genome-fragment | NA | 0     |
| S17-final-viral-combined_k141_157676 | [full] | 7183   | No   | NA    | 3  | 0  | Low-quality    | Genome-fragment | NA | 15.88 |
| S11-final-viral-combined_k141_157333 | [full] | 7185   | No   | NA    | 7  | 0  | Low-quality    | Genome-fragment | NA | 16.5  |
| S6-final-viral-combined_k141_39484   | [full] | 2317   | No   | NA    | 0  | 0  | Not-determined | Genome-fragment | NA | 0     |
| S6-final-viral-combined_k141_103151  | [full] | 3466   | No   | NA    | 0  | 0  | Not-determined | Genome-fragment | NA | 0     |
| S6-final-viral-combined_k141_74245   | [full] | 7348   | No   | NA    | 0  | 4  | Not-determined | Genome-fragment | NA | 0     |
| S6-final-viral-combined_k141_127118  | [full] | 1711   | No   | NA    | 0  | 0  | Not-determined | Genome-fragment | NA | 0     |
| S6-final-viral-combined_k141_63180   | [full] | 1453   | No   | NA    | 0  | 1  | Not-determined | Genome-fragment | NA | 0     |
| S6-final-viral-combined_k141_9462    | [full] | 1095   | No   | NA    | 0  | 1  | Not-determined | Genome-fragment | NA | 0     |
| S6-final-viral-combined_k141_20943   | [full] | 14047  | No   | NA    | 0  | 5  | Not-determined | Genome-fragment | NA | 0     |
| S6-final-viral-combined_k141_63202   | [full] | 4118   | No   | NA    | 0  | 2  | Not-determined | Genome-fragment | NA | 0     |
| S6-final-viral-combined_k141_138523  | [full] | 1413   | No   | NA    | 0  | 1  | Not-determined | Genome-fragment | NA | 0     |
| S1-final-viral-combined_k141_67298   | [full] | 7198   | No   | NA    | 0  | 0  | Low-quality    | Genome-fragment | NA | 12.99 |
| S6-final-viral-combined_k141_103411  | [full] | 2540   | No   | NA    | 0  | 1  | Not-determined | Genome-fragment | NA | 0     |
| S6-final-viral-combined_k141_2907    | [full] | 4527   | No   | NA    | 0  | 2  | Not-determined | Genome-fragment | NA | 0     |
| S6-final-viral-combined_k141_33359   | [full] | 2153   | No   | NA    | 0  | 1  | Not-determined | Genome-fragment | NA | 0     |
| S6-final-viral-combined_k141_63251   | [full] | 2258   | No   | NA    | 0  | 1  | Not-determined | Genome-fragment | NA | 0     |
| S8-final-viral-combined_k141_225189  | [full] | 7199   | No   | NA    | 0  | 1  | Low-quality    | Genome-fragment | NA | 4.85  |
| S1-final-viral-combined_k141_359862  | [full] | 7208   | No   | NA    | 0  | 0  | Low-quality    | Genome-fragment | NA | 17.33 |
| S2-final-viral-combined_k141_63251   | [full] | 7208   | No   | NA    | 0  | 5  | Low-quality    | Genome-fragment | NA | 3.58  |
| S6-final-viral-combined_k141_23406   | [full] | 1547   | No   | NA    | 0  | 2  | Not-determined | Genome-fragment | NA | 0     |
| S17-final-viral-combined_k141_49931  | [full] | 7220   | No   | NA    | 0  | 0  | Low-quality    | Genome-fragment | NA | 17.9  |
| S12_k141_124338                      |        | 7221   | No   | NA    | 2  | 1  | Low-quality    | Genome-fragment | NA | 22.24 |
| S12_k141_393348                      |        | 7221   | No   | NA    | 0  | 1  | Low-quality    | Genome-fragment | NA | 8.09  |
| S6-final-viral-combined_k141_33415   | [full] | 1076   | No   | NA    | 0  | 0  | Not-determined | Genome-fragment | NA | 0     |
| S6-final-viral-combined_k141_120901  | [full] | 3294   | No   | NA    | 0  | 3  | Not-determined | Genome-fragment | NA | 0     |
| S12_k141_216781                      |        | 7221   | No   | NA    | 1  | 0  | Low-quality    | Genome-fragment | NA | 4.84  |
| S6-final-viral-combined_k141_33427   | [full] | 4950   | No   | NA    | 3  | 0  | Not-determined | Genome-fragment | NA | 0     |
| S12_k141_179926                      |        | 7224   | No   | NA    | 2  | 0  | Low-quality    | Genome-fragment | NA | 4.49  |
| S4-final-viral-combined_k141_33086   | [full] | 7225   | Yes  | 4760  | 2  | 1  | Low-quality    | Genome-fragment | NA | 5.4   |
| S6-final-viral-combined_k141_3595    | [full] | 1290   | No   | NA    | 0  | 0  | Not-determined | Genome-fragment | NA | 0     |
| S1_k141_378559                       |        | 7228   | Yes  | 957   | 1  | 5  | Low-quality    | Genome-fragment | NA | 0.58  |
| S1_k141_55245                        |        | 7231   | No   | NA    | 1  | 0  | Low-quality    | Genome-fragment | NA | 5.34  |
| S6-final-viral-combined_k141_100709  | [full] | 1055   | No   | NA    | 0  | 0  | Not-determined | Genome-fragment | NA | 0     |
| S6-final-viral-combined_k141_79976   | [full] | 2203   | No   | NA    | 0  | 1  | Not-determined | Genome-fragment | NA | 0     |
| S11-final-viral-combined_k141_179909 | [full] | 7233   | No   | NA    | 1  | 0  | Low-quality    | Genome-fragment | NA | 10.94 |
| S6-final-viral-combined_k141_33479   | [full] | 1486   | No   | NA    | 0  | 1  | Not-determined | Genome-fragment | NA | 0     |
| S1_k141_277486                       |        | 7217   | No   | NA    | 1  | 0  | Low-quality    | Genome-fragment | NA | 4.85  |
| S5-final-viral-combined_k141_128924  | [full] | 7240   | No   | NA    | 2  | 0  | Low-quality    | Genome-fragment | NA | 8.12  |
| S6-final-viral-combined_k141_69103   | [full] | 9972   | No   | NA    | 0  | 6  | Not-determined | Genome-fragment | NA | 0     |
| S7-final-viral-combined_k141_233650  | [full] | 7242   | Yes  | 4918  | 1  | 1  | Low-quality    | Genome-fragment | NA | 32.26 |
| S8-final-viral-combined_k141_94508   | [full] | 7250   | No   | NA    | 9  | 0  | Low-quality    | Genome-fragment | NA | 18.14 |
| S6-final-viral-combined_k141_39648   | [full] | 1924   | No   | NA    | 0  | 1  | Not-determined | Genome-fragment | NA | 0     |
| S6-final-viral-combined_k141_94488   | [full] | 2240   | No   | NA    | 0  | 2  | Not-determined | Genome-fragment | NA | 0     |
| S6-final-viral-combined_k141_109778  | [full] | 1625   | No   | NA    | 0  | 0  | Not-determined | Genome-fragment | NA | 0     |
| S5_k141_204367                       |        | 7253   | No   | NA    | 8  | 0  | Low-quality    | Genome-fragment | NA | 17.25 |
| S6-final-viral-combined_k141_21011   | [full] | 2973   | No   | NA    | 0  | 2  | Not-determined | Genome-fragment | NA | 0     |
| S6-final-viral-combined_k141_2410    | [full] | 4724   | No   | NA    | 0  | 0  | Not-determined | Genome-fragment | NA | 0     |
| S6-final-viral-combined_k141_121049  | [full] | 1485   | No   | NA    | 0  | 1  | Not-determined | Genome-fragment | NA | 0     |
| S6-final-viral-combined_k141_45666   | [full] | 1223   | No   | NA    | 0  | 1  | Not-determined | Genome-fragment | NA | 0     |
| S6-final-viral-combined_k141_14651   | [full] | 6805   | No   | NA    | 0  | 2  | Not-determined | Genome-fragment | NA | 0     |
| S6-final-viral-combined_k141_80100   | [full] | 3009   | No   | NA    | 0  | 2  | Not-determined | Genome-fragment | NA | 0     |
| S6-final-viral-combined_k141_27429   | [full] | 1283   | No   | NA    | 0  | 3  | Not-determined | Genome-fragment | NA | 0     |
| S6-final-viral-combined_k141_80124   | [full] | 2952   | No   | NA    | 0  | 0  | Not-determined | Genome-fragment | NA | 0     |
| S6-final-viral-combined_k141_159212  | [full] | 3095   | No   | NA    | 0  | 1  | Not-determined | Genome-fragment | NA | 0     |
| S12-final-viral-combined_k141_14090  | [full] | 7259   | Yes  | 5942  | 1  | 1  | Low-quality    | Genome-fragment | NA | 6.19  |
| S8-final-viral-combined_k141_29300   | [full] | 7260   | No   | NA    | 0  | 1  | Low-quality    | Genome-fragment | NA | 8.96  |
| S6-final-viral-combined_k141_27458   | [full] | 3445   | No   | NA    | 0  | 2  | Not-determined | Genome-fragment | NA | 0     |
| S6-final-viral-combined_k141_9718    | [full] | 1284   | No   | NA    | 0  | 1  | Not-determined | Genome-fragment | NA | 0     |
| S6-final-viral-combined_k141_62606   | [full] | 7608   | No   | NA    | 0  | 2  | Not-determined | Genome-fragment | NA | 0     |
| S6-final-viral-combined_k141_15941   | [full] | 1917   | No   | NA    | 0  | 1  | Not-determined | Genome-fragment | NA | 0     |
| S6-final-viral-combined_k141_45707   | [full] | 2688   | No   | NA    | 0  | 1  | Not-determined | Genome-fragment | NA | 0     |
| S12_k141_191454                      |        | 7263   | No   | NA    | 0  | 1  | Low-quality    | Genome-fragment | NA | 14.22 |
| S6-final-viral-combined_k141_69201   | [full] | 3016   | No   | NA    | 0  | 1  | Not-determined | Genome-fragment | NA | 0     |
| S6-final-viral-combined_k141_27146   | [full] | 7266   | No   | NA    | 0  | 0  | Low-quality    | Genome-fragment | NA | 8.62  |
| S12-final-viral-combined_k141_136153 | [full] | 7269   | No   | NA    | 2  | 0  | Low-quality    | Genome-fragment | NA | 21.24 |
| S11-final-viral-combined_k141_221159 | [full] | 7274   | No</ |       |    |    |                |                 |    |       |



|                                      |        |       |     |      |    |    |                |                 |    |       |       |
|--------------------------------------|--------|-------|-----|------|----|----|----------------|-----------------|----|-------|-------|
| S6-final-viral-combined_k141_21305   | [full] | 5252  | No  | NA   | 0  | 0  | Not-determined | Genome-fragment | NA |       | 0     |
| S1_k141_77019                        |        | 7297  | No  | NA   | 1  | 0  | Low-quality    | Genome-fragment | NA | 8.17  | 0     |
| S2-final-viral-combined_k141_191300  | [full] | 7306  | No  | NA   | 2  | 0  | Low-quality    | Genome-fragment | NA | 16.04 | 0     |
| S11-final-viral-combined_k141_88348  | [full] | 7308  | No  | NA   | 0  | 4  | Low-quality    | Genome-fragment | NA | 5.6   | 0     |
| S12_k141_164905                      |        | 7308  | No  | NA   | 2  | 0  | Low-quality    | Genome-fragment | NA | 3.36  | 0     |
| S6-final-viral-combined_k141_5739    | [full] | 6301  | No  | NA   | 0  | 3  | Not-determined | Genome-fragment | NA |       | 0     |
| S8-final-viral-combined_k141_885     | [full] | 7311  | No  | NA   | 0  | 5  | Low-quality    | Genome-fragment | NA | 11.21 | 0     |
| S2-final-viral-combined_k141_9227    | [full] | 7316  | No  | NA   | 1  | 0  | Low-quality    | Genome-fragment | NA | 11.07 | 0     |
| S6-final-viral-combined_k141_27785   | [full] | 5587  | No  | NA   | 0  | 4  | Not-determined | Genome-fragment | NA |       | 0     |
| S6-final-viral-combined_k141_63726   | [full] | 2006  | No  | NA   | 0  | 3  | Not-determined | Genome-fragment | NA |       | 0     |
| S6-final-viral-combined_k141_74847   | [full] | 2349  | No  | NA   | 0  | 2  | Not-determined | Genome-fragment | NA |       | 0     |
| S6-final-viral-combined_k141_80126   | [full] | 7317  | No  | NA   | 0  | 4  | Low-quality    | Genome-fragment | NA | 14.13 | 0     |
| S4_k141_136411                       |        | 7319  | No  | NA   | 1  | 1  | Low-quality    | Genome-fragment | NA | 10.51 | 0     |
| S2-final-viral-combined_k141_178335  | [full] | 7322  | No  | NA   | 5  | 0  | Low-quality    | Genome-fragment | NA | 10.11 | 0     |
| S6-final-viral-combined_k141_110243  | [full] | 3077  | No  | NA   | 1  | 0  | Not-determined | Genome-fragment | NA | 3.45  | 29.8  |
| S12_k141-viral-combined_k141_198239  | [full] | 7325  | Yes | 5135 | 1  | 0  | Low-quality    | Genome-fragment | NA |       | 0     |
| S6-final-viral-combined_k141_54644   | [full] | 35272 | Yes | 2442 | 12 | 8  | Medium-quality | Genome-fragment | NA | 69.66 | 30.7  |
| S6-final-viral-combined_k141_92577   | [full] | 3664  | No  | NA   | 0  | 0  | Not-determined | Genome-fragment | NA |       | 0     |
| S2-final-viral-combined_k141_10740   | [full] | 7322  | No  | NA   | 0  | 1  | Low-quality    | Genome-fragment | NA | 15.05 | 0     |
| S17-k141_115619                      |        | 7333  | No  | NA   | 1  | 0  | Low-quality    | Genome-fragment | NA | 21.96 | 0     |
| S5-final-viral-combined_k141_8801    | [full] | 7335  | No  | NA   | 2  | 1  | Low-quality    | Genome-fragment | NA | 8.16  | 0     |
| S11-final-viral-combined_k141_144607 | [full] | 7338  | No  | NA   | 0  | 1  | Low-quality    | Genome-fragment | NA | 7.71  | 0     |
| S6-final-viral-combined_k141_92637   | [full] | 1790  | No  | NA   | 0  | 1  | Not-determined | Genome-fragment | NA |       | 0     |
| S6-final-viral-combined_k141_133382  | [full] | 1571  | No  | NA   | 0  | 2  | Not-determined | Genome-fragment | NA |       | 0     |
| S8-final-viral-combined_k141_110362  | [full] | 7338  | No  | NA   | 4  | 0  | Low-quality    | Genome-fragment | NA | 17.37 | 0     |
| S6-final-viral-combined_k141_51695   | [full] | 7265  | No  | NA   | 0  | 6  | Not-determined | Genome-fragment | NA |       | 0     |
| S7_k141_87267                        |        | 7348  | No  | NA   | 3  | 0  | Low-quality    | Genome-fragment | NA | 6.19  | 0     |
| S6-final-viral-combined_k141_133394  | [full] | 1315  | No  | NA   | 0  | 1  | Not-determined | Genome-fragment | NA |       | 0     |
| S2-final-viral-combined_k141_188061  | [full] | 7348  | No  | NA   | 2  | 0  | Low-quality    | Genome-fragment | NA | 17.1  | 0     |
| S9-final-viral-combined_k141_15069   | [full] | 7349  | No  | NA   | 5  | 0  | Low-quality    | Genome-fragment | NA | 17.36 | 0     |
| S1-final-viral-combined_k141_214205  | [full] | 7368  | Yes | 4835 | 1  | 3  | Low-quality    | Genome-fragment | NA | 11.22 | 34.38 |
| S6-final-viral-combined_k141_29841   | [full] | 2214  | No  | NA   | 0  | 0  | Not-determined | Genome-fragment | NA |       | 0     |
| S6-final-viral-combined_k141_85936   | [full] | 7368  | No  | NA   | 0  | 7  | Low-quality    | Genome-fragment | NA | 6.15  | 0     |
| S6-final-viral-combined_k141_99091   | [full] | 2043  | No  | NA   | 0  | 1  | Not-determined | Genome-fragment | NA |       | 0     |
| S6-final-viral-combined_k141_46228   | [full] | 2152  | No  | NA   | 0  | 2  | Not-determined | Genome-fragment | NA |       | 0     |
| S6-final-viral-combined_k141_83914   | [full] | 1151  | No  | NA   | 0  | 0  | Not-determined | Genome-fragment | NA |       | 0     |
| S12-final-viral-combined_k141_401160 | [full] | 7369  | No  | NA   | 1  | 1  | Low-quality    | Genome-fragment | NA | 17.2  | 0     |
| S2_k141_125322                       |        | 7371  | No  | NA   | 4  | 0  | Low-quality    | Genome-fragment | NA | 5.04  | 0     |
| S6_k141_115995                       |        | 7372  | No  | NA   | 2  | 0  | Low-quality    | Genome-fragment | NA | 7.3   | 0     |
| S6-final-viral-combined_k141_10027   | [full] | 1199  | No  | NA   | 0  | 1  | Not-determined | Genome-fragment | NA |       | 0     |
| S6-final-viral-combined_k141_74934   | [full] | 2512  | No  | NA   | 0  | 2  | Not-determined | Genome-fragment | NA |       | 0     |
| S6-final-viral-combined_k141_21478   | [full] | 1933  | No  | NA   | 0  | 2  | Not-determined | Genome-fragment | NA |       | 0     |
| S6-final-viral-combined_k141_51798   | [full] | 1721  | No  | NA   | 0  | 1  | Not-determined | Genome-fragment | NA |       | 0     |
| S6-final-viral-combined_k141_86740   | [full] | 3452  | No  | NA   | 0  | 1  | Not-determined | Genome-fragment | NA |       | 0     |
| S9-final-viral-combined_k141_115982  | [full] | 7374  | No  | NA   | 6  | 0  | Low-quality    | Genome-fragment | NA | 8.08  | 0     |
| S17-final-viral-combined_k141_14571  | [full] | 7374  | No  | NA   | 9  | 0  | Low-quality    | Genome-fragment | NA | 8.96  | 0     |
| S11-final-viral-combined_k141_141316 | [full] | 7377  | No  | NA   | 3  | 0  | Low-quality    | Genome-fragment | NA | 25.71 | 0     |
| S6-final-viral-combined_k141_116108  | [full] | 7382  | No  | NA   | 0  | 6  | Not-determined | Genome-fragment | NA |       | 0     |
| S12-final-viral-combined_k141_281902 | [full] | 1063  | No  | NA   | 0  | 0  | Low-quality    | Genome-fragment | NA | 12.55 | 0     |
| S6-final-viral-combined_k141_127741  | [full] | 10963 | No  | NA   | 0  | 8  | Not-determined | Genome-fragment | NA |       | 0     |
| S6-final-viral-combined_k141_27996   | [full] | 2514  | No  | NA   | 0  | 1  | Not-determined | Genome-fragment | NA |       | 0     |
| S6-final-viral-combined_k141_99177   | [full] | 1376  | No  | NA   | 0  | 1  | Not-determined | Genome-fragment | NA |       | 0     |
| S6-final-viral-combined_k141_10094   | [full] | 4634  | No  | NA   | 0  | 2  | Not-determined | Genome-fragment | NA |       | 0     |
| S1-final-viral-combined_k141_3510    | [full] | 7392  | Yes | 3136 | 3  | 3  | Low-quality    | Genome-fragment | NA | 6.66  | 57.58 |
| S6-final-viral-combined_k141_46325   | [full] | 1791  | No  | NA   | 0  | 0  | Not-determined | Genome-fragment | NA |       | 0     |
| S7-final-viral-combined_k141_84740   | [full] | 7399  | No  | NA   | 3  | 0  | Low-quality    | Genome-fragment | NA | 21    | 0     |
| S6-final-viral-combined_k141_139168  | [full] | 2024  | No  | NA   | 0  | 2  | Not-determined | Genome-fragment | NA |       | 0     |
| S6-final-viral-combined_k141_16518   | [full] | 2527  | No  | NA   | 0  | 1  | Not-determined | Genome-fragment | NA |       | 0     |
| S6-final-viral-combined_k141_21578   | [full] | 3124  | No  | NA   | 0  | 2  | Not-determined | Genome-fragment | NA |       | 0     |
| S6-final-viral-combined_k141_21583   | [full] | 1624  | No  | NA   | 0  | 0  | Not-determined | Genome-fragment | NA |       | 0     |
| S6-final-viral-combined_k141_51871   | [full] | 43498 | No  | NA   | 0  | 14 | Not-determined | Genome-fragment | NA |       | 0     |
| S6-final-viral-combined_k141_133140  | [full] | 2172  | No  | NA   | 0  | 2  | Not-determined | Genome-fragment | NA |       | 0     |
| S9-final-viral-combined_k141_74179   | [full] | 7404  | No  | NA   | 0  | 1  | Low-quality    | Genome-fragment | NA | 7.38  | 0     |
| S11_k141_94935                       |        | 7412  | No  | NA   | 0  | 0  | Low-quality    | Genome-fragment | NA | 7.99  | 0     |
| S11-final-viral-combined_k141_157235 | [full] | 7413  | No  | NA   | 4  | 0  | Low-quality    | Genome-fragment | NA | 10.37 | 0     |
| S11-final-viral-combined_k141_239416 | [full] | 7414  | No  | NA   | 6  | 0  | Low-quality    | Genome-fragment | NA | 19.95 | 0     |
| S6-final-viral-combined_k141_121484  | [full] | 2124  | No  | NA   | 0  | 1  | Not-determined | Genome-fragment | NA |       | 0     |
| S7_k141_156336                       |        | 7415  | No  | NA   | 3  | 1  | Low-quality    | Genome-fragment | NA | 11.72 | 0     |
| S8-final-viral-combined_k141_261301  | [full] | 1417  | No  | NA   | 0  | 0  | Low-quality    | Genome-fragment | NA | 17.63 | 0     |
| S6-final-viral-combined_k141_99266   | [full] | 1450  | No  | NA   | 0  | 1  | Not-determined | Genome-fragment | NA |       | 0     |
| S2-final-viral-combined_k141_31161   | [full] | 7418  | Yes | 6182 | 1  | 2  | Low-quality    | Genome-fragment | NA | 5.65  | 16.66 |
| S6-final-viral-combined_k141_99273   | [full] | 1752  | No  | NA   | 0  | 0  | Not-determined | Genome-fragment | NA |       | 0     |
| S6-final-viral-combined_k141_121493  | [full] | 1480  | No  | NA   | 0  | 0  | Not-determined | Genome-fragment | NA |       | 0     |
| S6-final-viral-combined_k141_99281   | [full] | 5650  | No  | NA   | 0  | 2  | Not-determined | Genome-fragment | NA |       | 0     |
| S11-final-viral-combined_k141_140791 | [full] | 7419  | No  | NA   | 0  | 0  | Low-quality    | Genome-fragment | NA | 11.96 | 0     |
| S6-final-viral-combined_k141_139254  | [full] | 8754  | No  | NA   | 2  | 5  | Not-determined | Genome-fragment | NA |       | 0     |
| S6-final-viral-combined_k141_16644   | [full] | 3814  | No  | NA   | 0  | 2  | Not-determined | Genome-fragment | NA |       | 0     |
| S11_k141_95476                       |        | 7424  | No  | NA   | 1  | 0  | Low-quality    | Genome-fragment | NA | 14.66 | 0     |
| S6-final-viral-combined_k141_133626  | [full] | 3170  | No  | NA   | 0  | 0  | Not-determined | Genome-fragment | NA |       | 0     |
| S12-final-viral-combined_k141_120350 | [full] | 7425  | No  | NA   | 1  | 0  | Low-quality    | Genome-fragment | NA | 8.11  | 0     |
| S6-final-viral-combined_k141_121571  | [full] | 3348  | No  | NA   | 0  | 2  | Not-determined | Genome-fragment | NA |       | 0     |
| S6-final-viral-combined_k141_102301  | [full] | 6101  | No  | NA   | 0  | 7  | Not-determined | Genome-fragment | NA |       | 0     |
| S6-final-viral-combined_k141_121578  | [full] | 2247  | No  | NA   | 0  | 1  | Not-determined | Genome-fragment | NA |       | 0     |
| S6-final-viral-combined_k141_64168   | [full] | 2457  | No  | NA   | 0  | 2  | Not-determined | Genome-fragment | NA |       | 0     |
| S6-final-viral-combined_k141_40478   | [full] | 1041  | No  | NA   | 0  | 0  | Not-determined | Genome-fragment | NA |       | 0     |
| S3_k141_61573                        |        | 7434  | No  | NA   | 1  | 0  | Low-quality    | Genome-fragment | NA | 5.42  | 0     |
| S2-final-viral-combined_k141_188665  | [full] | 7434  | No  | NA   | 9  | 1  | Low-quality    | Genome-fragment | NA | 15.58 | 0     |
| S6-final-viral-combined_k141_9927    | [full] | 2308  | No  | NA   | 0  | 1  | Not-determined | Genome-fragment | NA |       | 0     |
| S12_k141_146816                      |        | 7438  | No  | NA   | 0  | 0  | Low-quality    | Genome-fragment | NA | 12.38 | 0     |
| S6-final-viral-combined_k141_69919   | [full] | 4624  | No  | NA   | 0  | 2  | Not-determined | Genome-fragment | NA |       | 0     |
| S6-final-viral-combined_k141_121619  | [full] | 1956  | No  | NA   | 0  | 3  | Not-determined | Genome-fragment | NA |       | 0     |
| S6-final-viral-combined_k141_139341  | [full] | 6792  | No  | NA   | 0  | 5  | Not-determined | Genome-fragment | NA |       | 0     |
| S12-final-viral-combined_k141_165279 | [full] | 7441  | No  | NA   | 0  | 0  | Low-quality    | Genome-fragment | NA | 13.5  | 0     |
| S6-final-viral-combined_k141_103961  | [full] | 1622  | No  | NA   | 0  | 2  | Not-determined | Genome-fragment | NA |       | 0     |
| S6-final-viral-combined_k141_128080  | [full] | 1187  | No  | NA   | 0  | 0  | Not-determined | Genome-fragment | NA |       | 0     |
| S11-final-viral-combined_k141_170495 | [full] | 7445  | No  | NA   | 1  | 0  | Low-quality    | Genome-fragment | NA | 12.18 | 0     |
| S4-final-viral-combined_k141_130575  | [full] | 7446  | No  | NA   | 0  | 0  | Low-quality    | Genome-fragment | NA | 17.46 | 0     |
| S6-final-viral-combined_k141_69972   | [full] | 1755  | No  | NA   | 0  | 0  | Not-determined | Genome-fragment | NA |       | 0     |
| S6-final-viral-combined_k141_110648  | [full] | 3642  | No  | NA   | 0  | 0  | Not-determined | Genome-fragment | NA |       | 0     |
| S6-final-viral-combined_k141_10343   | [full] | 3017  | No  | NA   | 0  | 0  | Not-determined | Genome-fragment | NA |       | 0     |
| S12-final-viral-combined_k141_57851  | [full] | 7447  | No  | NA   | 3  | 0  | Low-quality    | Genome-fragment | NA | 25.95 | 0     |
| S11-final-viral-combined_k141_271215 | [full] | 7453  | No  | NA   | 0  | 1  | Low-quality    | Genome-fragment | NA | 11.93 | 0     |
| S2-final-viral-combined_k141_71556   | [full] | 7457  | No  | NA   | 0  | 1  | Low-quality    | Genome-fragment | NA | 5.34  | 0     |
| S6-final-viral-combined_k141_133804  | [full] | 2547  | No  | NA   | 0  | 3  | Not-determined | Genome-fragment | NA |       | 0     |
| S6-final-viral-combined_k141_99471   | [full] | 1189  | No  | NA   | 0  | 0  | Not-determined | Genome-fragment | NA |       | 0     |
| S6-final-viral-combined_k141_116450  | [full] | 2115  | No  | NA   | 0  | 0  | Not-determined | Genome-fragment | NA |       | 0     |
| S6-final-viral-combined_k141_46451   | [full] | 2595  | No  | NA   | 0  | 2  | Not-determined | Genome-fragment | NA |       | 0     |
| S6-final-viral-combined_k141_70073   | [full] | 1668  | No  | NA   | 0  | 0  | Not-determined | Genome-fragment | NA |       | 0     |
| S1_k141_297882                       |        | 7464  | No  | NA   | 1  | 0  | Low-quality    | Genome-fragment | NA | 13.74 | 0     |
| S1_k141_158541                       |        | 7464  | No  | NA   | 1  | 0  | Low-quality    | Genome-fragment | NA | 4.45  | 0     |
| S6-final-viral-combined_k141_110710  | [full] | 1990  | No  | NA   | 0  | 2  | Not-determined | Genome-fragment | NA |       | 0     |
| S6-final-viral-combined_k141_133869  | [full] | 2211  | No  | NA   | 0  | 0  | Not-determined | Genome-fragment | NA |       | 0     |
| S7-final-viral-combined_k141_27469   | [full] | 7464  | No  | NA   | 0  | 3  | Low-quality    | Genome-fragment | NA | 3.44  | 0     |
| S6-final-viral-combined_k141_133870  | [full] | 1472  | No  | NA   | 0  | 0  | Not-determined | Genome-fragment | NA |       | 0     |
| S6-final-viral-combined_k141_54404   | [full] | 1789  | No  | NA   | 0  | 0  | Not-determined | Genome-fragment | NA |       | 0     |
| S6-final-viral-combined_k141_40688   | [full] | 1851  | No  | NA   | 0  | 1  | Not-determined | Genome-fragment | NA |       | 0     |
| S12-final-viral-combined_k141_200505 | [full] | 7465  | No  | NA   | 0  | 1  | Low-quality    | Genome-fragment | NA | 13.27 | 0     |
| S6-final-viral-combined_k141_92900   | [full] | 3467  | No  | NA   | 0  | 4  | Not-determined | Genome-fragment | NA |       | 0     |
| S12_k141_27135                       |        | 7466  | No  | NA   | 0  | 2  | Low-quality    | Genome-fragment | NA | 4.13  | 0     |
| S6-final-viral-combined_k141_121776  | [full] | 3410  | No  | NA   | 0  | 1  | Not-determined | Genome-fragment | NA |       | 0     |
| S6-final-viral-combined_k141_10466   | [full] | 1040  | No  | NA   | 0  | 1  | Not-determined | Genome-fragment | NA |       | 0     |
| S6-final-viral-combined_k141_133518  | [full] | 5644  | No  | NA   | 0  | 2  | Not-determined | Genome-fragment | NA |       | 0     |
| S6-final-viral-combined_k141_75261   | [full] | 10416 | No  | NA   | 0  | 4  | Not-determined | Genome-fragment | NA |       | 0     |
| S6-final-viral-combined_k141_56893   | [full] | 4766  | No  | NA   | 0  | 3  |                |                 |    |       |       |



|                                      |        |       |     |      |    |    |                |                 |    |       |       |
|--------------------------------------|--------|-------|-----|------|----|----|----------------|-----------------|----|-------|-------|
| 56-final-viral-combined_k141_134134  | [full] | 1761  | No  | NA   | 0  | 1  | Not-determined | Genome-fragment | NA | 0     | 0     |
| 56-final-viral-combined_k141_93340   | [full] | 1721  | No  | NA   | 0  | 1  | Not-determined | Genome-fragment | NA | 0     | 0     |
| 56-final-viral-combined_k141_52550   | [full] | 1319  | No  | NA   | 0  | 1  | Not-determined | Genome-fragment | NA | 0     | 0     |
| 56-final-viral-combined_k141_75586   | [full] | 7054  | No  | NA   | 0  | 6  | Not-determined | Genome-fragment | NA | 0     | 0     |
| 58-final-viral-combined_k141_22340   | [full] | 7535  | No  | NA   | 3  | 0  | Low-quality    | Genome-fragment | NA | 15.72 | 0     |
| 56-final-viral-combined_k141_70451   | [full] | 1121  | No  | NA   | 0  | 0  | Not-determined | Genome-fragment | NA | 0     | 0     |
| 56-final-viral-combined_k141_116874  | [full] | 2011  | No  | NA   | 0  | 1  | Not-determined | Genome-fragment | NA | 0     | 0     |
| 56-final-viral-combined_k141_134130  | [full] | 1872  | No  | NA   | 0  | 1  | Not-determined | Genome-fragment | NA | 0     | 0     |
| 56-final-viral-combined_k141_93380   | [full] | 6009  | No  | NA   | 0  | 1  | Not-determined | Genome-fragment | NA | 0     | 0     |
| 56-final-viral-combined_k141_52602   | [full] | 1476  | No  | NA   | 0  | 1  | Not-determined | Genome-fragment | NA | 0     | 0     |
| 56-final-viral-combined_k141_87597   | [full] | 1900  | No  | NA   | 0  | 0  | Not-determined | Genome-fragment | NA | 0     | 0     |
| 512-final-viral-combined_k141_23868  | [full] | 7538  | No  | NA   | 3  | 0  | Low-quality    | Genome-fragment | NA | 17.98 | 0     |
| 517-final-viral-combined_k141_56461  | [full] | 7539  | No  | NA   | 0  | 3  | Low-quality    | Genome-fragment | NA | 7.47  | 0     |
| 52_k141_244585                       |        | 7540  | Yes | 4496 | 1  | 1  | Low-quality    | Genome-fragment | NA | 2.65  | 40.37 |
| 52_k141_82606                        |        | 7542  | No  | NA   | 6  | 0  | Low-quality    | Genome-fragment | NA | 20.06 | 0     |
| 56-final-viral-combined_k141_10722   | [full] | 2273  | No  | NA   | 0  | 2  | Not-determined | Genome-fragment | NA | 0     | 0     |
| 56-final-viral-combined_k141_17227   | [full] | 2300  | No  | NA   | 0  | 3  | Not-determined | Genome-fragment | NA | 0     | 0     |
| 56-final-viral-combined_k141_104558  | [full] | 2105  | No  | NA   | 0  | 1  | Not-determined | Genome-fragment | NA | 0     | 0     |
| 57-final-viral-combined_k141_208542  | [full] | 7547  | No  | NA   | 0  | 2  | Low-quality    | Genome-fragment | NA | 0.65  | 0     |
| 56-final-viral-combined_k141_104565  | [full] | 2416  | No  | NA   | 0  | 1  | Not-determined | Genome-fragment | NA | 0     | 0     |
| 56-final-viral-combined_k141_34515   | [full] | 4451  | No  | NA   | 0  | 0  | Not-determined | Genome-fragment | NA | 0     | 0     |
| 56-final-viral-combined_k141_52721   | [full] | 1225  | No  | NA   | 0  | 0  | Not-determined | Genome-fragment | NA | 6.09  | 0     |
| 517-final-viral-combined_k141_265594 | [full] | 7552  | No  | NA   | 0  | 3  | Low-quality    | Genome-fragment | NA | 12.2  | 0     |
| 56-final-viral-combined_k141_22347   | [full] | 21617 | No  | NA   | 0  | 14 | Not-determined | Genome-fragment | NA | 0     | 0     |
| 511-final-viral-combined_k141_157870 | [full] | 7556  | No  | NA   | 0  | 3  | Low-quality    | Genome-fragment | NA | 4.09  | 0     |
| 512-final-viral-combined_k141_386785 | [full] | 7559  | No  | NA   | 0  | 5  | Low-quality    | Genome-fragment | NA | 3.28  | 0     |
| 56-final-viral-combined_k141_87628   | [full] | 1163  | No  | NA   | 0  | 2  | Not-determined | Genome-fragment | NA | 0     | 0     |
| 54-final-viral-combined_k141_27687   | [full] | 7562  | No  | NA   | 3  | 0  | Low-quality    | Genome-fragment | NA | 17.64 | 0     |
| 55-final-viral-combined_k141_87762   | [full] | 7564  | No  | NA   | 0  | 1  | Low-quality    | Genome-fragment | NA | 18.36 | 0     |
| 56-final-viral-combined_k141_128604  | [full] | 20343 | No  | NA   | 0  | 11 | Not-determined | Genome-fragment | NA | 0     | 0     |
| 56-final-viral-combined_k141_104616  | [full] | 1083  | No  | NA   | 0  | 1  | Not-determined | Genome-fragment | NA | 0     | 0     |
| 54_k141_33635                        |        | 7568  | No  | NA   | 1  | 0  | Low-quality    | Genome-fragment | NA | 12.61 | 0     |
| 56-final-viral-combined_k141_171017  | [full] | 2205  | No  | NA   | 0  | 2  | Not-determined | Genome-fragment | NA | 0     | 0     |
| 56-final-viral-combined_k141_34577   | [full] | 1912  | No  | NA   | 0  | 0  | Not-determined | Genome-fragment | NA | 0     | 0     |
| 517-final-viral-combined_k141_207580 | [full] | 7570  | No  | NA   | 2  | 0  | Low-quality    | Genome-fragment | NA | 13.28 | 0     |
| 57_k141_102462                       |        | 7571  | Yes | 5167 | 2  | 1  | Low-quality    | Genome-fragment | NA | 8.64  | 31.75 |
| 56-final-viral-combined_k141_52736   | [full] | 1652  | No  | NA   | 0  | 1  | Not-determined | Genome-fragment | NA | 0     | 0     |
| 511-final-viral-combined_k141_23266  | [full] | 7573  | No  | NA   | 0  | 0  | Low-quality    | Genome-fragment | NA | 21.65 | 0     |
| 52-final-viral-combined_k141_207451  | [full] | 7573  | No  | NA   | 0  | 1  | Low-quality    | Genome-fragment | NA | 6.09  | 0     |
| 512-final-viral-combined_k141_43296  | [full] | 7575  | No  | NA   | 0  | 5  | Low-quality    | Genome-fragment | NA | 4.52  | 0     |
| 58-final-viral-combined_k141_81836   | [full] | 7575  | Yes | 1503 | 1  | 4  | Low-quality    | Genome-fragment | NA | 1.08  | 80.16 |
| 56-final-viral-combined_k141_574165  | [full] | 4091  | No  | NA   | 2  | 0  | Not-determined | Genome-fragment | NA | 0     | 0     |
| 51-final-viral-combined_k141_180037  | [full] | 7576  | Yes | 243  | 1  | 5  | Low-quality    | Genome-fragment | NA | 0.14  | 96.79 |
| 511-final-viral-combined_k141_193356 | [full] | 7580  | No  | NA   | 0  | 3  | Low-quality    | Genome-fragment | NA | 12.8  | 0     |
| 56-final-viral-combined_k141_104091  | [full] | 2377  | No  | NA   | 0  | 3  | Not-determined | Genome-fragment | NA | 0     | 0     |
| 56-final-viral-combined_k141_10867   | [full] | 5851  | No  | NA   | 0  | 4  | Not-determined | Genome-fragment | NA | 0     | 0     |
| 52_k141_99079                        |        | 7581  | No  | NA   | 1  | 0  | Low-quality    | Genome-fragment | NA | 8.06  | 0     |
| 57-final-viral-combined_k141_218351  | [full] | 7583  | No  | NA   | 0  | 4  | Low-quality    | Genome-fragment | NA | 12.67 | 0     |
| 56-final-viral-combined_k141_17398   | [full] | 1481  | No  | NA   | 0  | 0  | Not-determined | Genome-fragment | NA | 0     | 0     |
| 52-final-viral-combined_k141_226688  | [full] | 7585  | No  | NA   | 4  | 1  | Low-quality    | Genome-fragment | NA | 18.83 | 0     |
| 56-final-viral-combined_k141_28819   | [full] | 3020  | No  | NA   | 0  | 1  | Not-determined | Genome-fragment | NA | 0     | 0     |
| 58-final-viral-combined_k141_110348  | [full] | 7587  | No  | NA   | 0  | 0  | Low-quality    | Genome-fragment | NA | 17.58 | 0     |
| 56-final-viral-combined_k141_104813  | [full] | 2263  | No  | NA   | 0  | 1  | Not-determined | Genome-fragment | NA | 0     | 0     |
| 511-final-viral-combined_k141_84859  | [full] | 7590  | No  | NA   | 0  | 3  | Low-quality    | Genome-fragment | NA | 3.69  | 0     |
| 56-final-viral-combined_k141_28835   | [full] | 12184 | No  | NA   | 0  | 8  | Not-determined | Genome-fragment | NA | 0     | 0     |
| 56-final-viral-combined_k141_17452   | [full] | 1452  | No  | NA   | 0  | 1  | Not-determined | Genome-fragment | NA | 0     | 0     |
| 56-final-viral-combined_k141_28846   | [full] | 1468  | No  | NA   | 0  | 1  | Not-determined | Genome-fragment | NA | 0     | 0     |
| 56-final-viral-combined_k141_111313  | [full] | 3487  | No  | NA   | 0  | 3  | Not-determined | Genome-fragment | NA | 0     | 0     |
| 56-final-viral-combined_k141_109816  | [full] | 2879  | No  | NA   | 0  | 1  | Not-determined | Genome-fragment | NA | 0     | 0     |
| 56-final-viral-combined_k141_87822   | [full] | 2300  | No  | NA   | 0  | 1  | Not-determined | Genome-fragment | NA | 0     | 0     |
| 56-final-viral-combined_k141_25737   | [full] | 2002  | No  | NA   | 0  | 0  | Not-determined | Genome-fragment | NA | 0     | 0     |
| 56-final-viral-combined_k141_76834   | [full] | 2159  | No  | NA   | 0  | 1  | Not-determined | Genome-fragment | NA | 0     | 0     |
| 56-final-viral-combined_k141_81527   | [full] | 3986  | No  | NA   | 0  | 2  | Not-determined | Genome-fragment | NA | 0     | 0     |
| 56-final-viral-combined_k141_10988   | [full] | 7544  | No  | NA   | 0  | 3  | Not-determined | Genome-fragment | NA | 0     | 0     |
| 55-final-viral-combined_k141_118629  | [full] | 7590  | No  | NA   | 2  | 0  | Low-quality    | Genome-fragment | NA | 21.67 | 0     |
| 512-final-viral-combined_k141_260417 | [full] | 7590  | No  | NA   | 0  | 1  | Low-quality    | Genome-fragment | NA | 12.86 | 0     |
| 517-final-viral-combined_k141_123460 | [full] | 7592  | No  | NA   | 0  | 2  | Low-quality    | Genome-fragment | NA | 2.43  | 0     |
| 56-final-viral-combined_k141_24649   | [full] | 1940  | No  | NA   | 0  | 2  | Not-determined | Genome-fragment | NA | 0     | 0     |
| 517-final-viral-combined_k141_76985  | [full] | 7594  | Yes | 943  | 1  | 1  | Low-quality    | Genome-fragment | NA | 2.22  | 87.58 |
| 55-final-viral-combined_k141_17152   | [full] | 7595  | No  | NA   | 0  | 7  | Low-quality    | Genome-fragment | NA | 7.13  | 0     |
| 512_k141_109397                      |        | 7596  | No  | NA   | 0  | 2  | Low-quality    | Genome-fragment | NA | 6.42  | 0     |
| 58-final-viral-combined_k141_168300  | [full] | 7598  | No  | NA   | 0  | 4  | Low-quality    | Genome-fragment | NA | 3.62  | 0     |
| 56-final-viral-combined_k141_87862   | [full] | 1373  | No  | NA   | 0  | 0  | Not-determined | Genome-fragment | NA | 0     | 0     |
| 56-final-viral-combined_k141_104928  | [full] | 1171  | No  | NA   | 0  | 1  | Not-determined | Genome-fragment | NA | 0     | 0     |
| 56-final-viral-combined_k141_27587   | [full] | 1237  | No  | NA   | 0  | 0  | Not-determined | Genome-fragment | NA | 0     | 0     |
| 56-final-viral-combined_k141_111358  | [full] | 1594  | No  | NA   | 0  | 0  | Not-determined | Genome-fragment | NA | 0     | 0     |
| 55-final-viral-combined_k141_82022   | [full] | 7599  | No  | NA   | 6  | 0  | Low-quality    | Genome-fragment | NA | 12.53 | 0     |
| 56-final-viral-combined_k141_128922  | [full] | 1663  | No  | NA   | 0  | 2  | Not-determined | Genome-fragment | NA | 0     | 0     |
| 56-final-viral-combined_k141_247515  | [full] | 1484  | No  | NA   | 0  | 2  | Not-determined | Genome-fragment | NA | 0     | 0     |
| 56-final-viral-combined_k141_140203  | [full] | 14013 | No  | NA   | 0  | 4  | Not-determined | Genome-fragment | NA | 0     | 0     |
| 56-final-viral-combined_k141_81655   | [full] | 4045  | No  | NA   | 0  | 1  | Not-determined | Genome-fragment | NA | 0     | 0     |
| 512-final-viral-combined_k141_99807  | [full] | 7600  | No  | NA   | 5  | 0  | Low-quality    | Genome-fragment | NA | 18.55 | 0     |
| 53_k141_62971                        |        | 7603  | No  | NA   | 3  | 0  | Low-quality    | Genome-fragment | NA | 21.71 | 0     |
| 512_k141_261783                      |        | 7606  | No  | NA   | 0  | 4  | Low-quality    | Genome-fragment | NA | 6.17  | 0     |
| 56-final-viral-combined_k141_93777   | [full] | 3310  | No  | NA   | 0  | 2  | Not-determined | Genome-fragment | NA | 0     | 0     |
| 56-final-viral-combined_k141_22704   | [full] | 2096  | No  | NA   | 0  | 3  | Not-determined | Genome-fragment | NA | 0     | 0     |
| 56-final-viral-combined_k141_22708   | [full] | 5155  | No  | NA   | 0  | 4  | Not-determined | Genome-fragment | NA | 0     | 0     |
| 512-final-viral-combined_k141_352127 | [full] | 7608  | No  | NA   | 0  | 0  | Low-quality    | Genome-fragment | NA | 17.45 | 0     |
| 56-final-viral-combined_k141_128971  | [full] | 22180 | No  | NA   | 11 | 0  | Medium-quality | Genome-fragment | NA | 57.05 | 0     |
| 56-final-viral-combined_k141_34780   | [full] | 2891  | No  | NA   | 0  | 0  | Not-determined | Genome-fragment | NA | 0     | 0     |
| 511_k141_42028                       |        | 7614  | No  | NA   | 1  | 2  | Low-quality    | Genome-fragment | NA | 4.13  | 0     |
| 56-final-viral-combined_k141_28980   | [full] | 1069  | No  | NA   | 0  | 2  | Not-determined | Genome-fragment | NA | 0     | 0     |
| 52-final-viral-combined_k141_235836  | [full] | 7615  | No  | NA   | 2  | 0  | Low-quality    | Genome-fragment | NA | 17.93 | 0     |
| 55_k141_47963                        |        | 7628  | No  | NA   | 1  | 1  | Low-quality    | Genome-fragment | NA | 12.89 | 0     |
| 53-final-viral-combined_k141_60444   | [full] | 7621  | No  | NA   | 0  | 0  | Low-quality    | Genome-fragment | NA | 20.33 | 0     |
| 56-final-viral-combined_k141_117347  | [full] | 4370  | No  | NA   | 4  | 0  | Not-determined | Genome-fragment | NA | 0     | 0     |
| 511-final-viral-combined_k141_91725  | [full] | 7637  | No  | NA   | 7  | 0  | Low-quality    | Genome-fragment | NA | 18.91 | 0     |
| 56-final-viral-combined_k141_57772   | [full] | 1276  | No  | NA   | 0  | 0  | Not-determined | Genome-fragment | NA | 0     | 0     |
| 56-final-viral-combined_k141_57797   | [full] | 341   | No  | NA   | 0  | 0  | Not-determined | Genome-fragment | NA | 0     | 0     |
| 56-final-viral-combined_k141_122647  | [full] | 4806  | No  | NA   | 0  | 3  | Not-determined | Genome-fragment | NA | 0     | 0     |
| 56-final-viral-combined_k141_24865   | [full] | 2063  | No  | NA   | 0  | 1  | Not-determined | Genome-fragment | NA | 0     | 0     |
| 55-final-viral-combined_k141_6576    | [full] | 7645  | Yes | 2628 | 1  | 1  | Low-quality    | Genome-fragment | NA | 5.22  | 66.62 |
| 56-final-viral-combined_k141_140460  | [full] | 4759  | No  | NA   | 0  | 1  | Not-determined | Genome-fragment | NA | 0     | 0     |
| 56-final-viral-combined_k141_105086  | [full] | 5791  | No  | NA   | 0  | 6  | Not-determined | Genome-fragment | NA | 0     | 0     |
| 517-final-viral-combined_k141_18038  | [full] | 7646  | No  | NA   | 0  | 0  | Low-quality    | Genome-fragment | NA | 19.87 | 0     |
| 56-final-viral-combined_k141_11212   | [full] | 1909  | No  | NA   | 0  | 0  | Not-determined | Genome-fragment | NA | 0     | 0     |
| 56_k141_77919                        |        | 7661  | No  | NA   | 1  | 1  | Low-quality    | Genome-fragment | NA | 13.01 | 0     |
| 56-final-viral-combined_k141_11223   | [full] | NA    |     | NA   | 0  | 2  | Not-determined | Genome-fragment | NA | 0     | 0     |
| 511-final-viral-combined_k141_225740 | [full] | 7668  | No  | NA   | 0  | 1  | Low-quality    | Genome-fragment | NA | 18    | 0     |
| 56-final-viral-combined_k141_111470  | [full] | 1140  | No  | NA   | 0  | 0  | Not-determined | Genome-fragment | NA | 0     | 0     |
| 56-final-viral-combined_k141_134869  | [full] | 4525  | No  | NA   | 0  | 2  | Not-determined | Genome-fragment | NA | 0     | 0     |
| 56-final-viral-combined_k141_112880  | [full] | 2317  | No  | NA   | 0  | 1  | Not-determined | Genome-fragment | NA | 0     | 0     |
| 56-final-viral-combined_k141_14987   | [full] | 5411  | No  | NA   | 0  | 4  | Not-determined | Genome-fragment | NA | 0     | 0     |
| 51-final-viral-combined_k141_301406  | [full] | 7668  | No  | NA   | 0  | 5  | Low-quality    | Genome-fragment | NA | 17.39 | 0     |
| 56-final-viral-combined_k141_818648  | [full] | 5281  | No  | NA   | 0  | 1  | Not-determined | Genome-fragment | NA | 0     | 0     |
| 56-final-viral-combined_k141_81872   | [full] | 3517  | No  | NA   | 0  | 1  | Not-determined | Genome-fragment | NA | 0     | 0     |
| 56-final-viral-combined_k141_29291   | [full] | 1038  | No  | NA   | 0  | 0  | Not-determined | Genome-fragment | NA | 0     | 0     |
| 56-final-viral-combined_k141_81879   | [full] | 5455  | No  | NA   | 0  | 1  | Low-quality    | Genome-fragment | NA | 12.94 | 0     |
| 54_k141_157792                       |        | 7670  | No  | NA   | 1  | 0  | Low-quality    | Genome-fragment | NA | 0     | 0     |
| 56-final-viral-combined_k141_81899   | [full] | 2331  | No  | NA   | 0  | 0  | Not-determined | Genome-fragment | NA | 0     | 0     |
| 51-final-viral-combined_k141_81643   | [full] | 7676  | No  | NA   | 2  | 1  | Low-quality    | Genome-fragment | NA |       |       |



|                                      |      |     |      |   |   |                |                 |       |       |
|--------------------------------------|------|-----|------|---|---|----------------|-----------------|-------|-------|
| 59_k141_42987                        | 7748 | No  | NA   | 0 | 4 | Low-quality    | Genome-fragment | 5.33  | 0     |
| S11-final-viral-combined_k141_304586 | 7753 | Yes | 6408 | 8 | 1 | Low-quality    | Genome-fragment | 16.36 | 17.35 |
| S1-final-viral-combined_k141_75767   | 7757 | No  | NA   | 0 | 4 | Low-quality    | Genome-fragment | 3.83  | 0     |
| S6-final-viral-combined_k141_7882    | 1102 | No  | NA   | 0 | 1 | Not-determined | Genome-fragment | NA    | 0     |
| S2_k141_215826                       | 7758 | No  | NA   | 0 | 2 | Low-quality    | Genome-fragment | 3.15  | 0     |
| S8-final-viral-combined_k141_58647   | 7760 | No  | NA   | 0 | 1 | Low-quality    | Genome-fragment | 12.1  | 0     |
| S6-final-viral-combined_k141_78212   | 1849 | No  | NA   | 0 | 0 | Not-determined | Genome-fragment | NA    | 0     |
| S6-final-viral-combined_k141_37531   | 1404 | No  | NA   | 0 | 0 | Not-determined | Genome-fragment | NA    | 0     |
| S17-final-viral-combined_k141_4431   | 7762 | No  | NA   | 0 | 2 | Low-quality    | Genome-fragment | 0.9   | 0     |
| S6-final-viral-combined_k141_58662   | 7765 | No  | NA   | 2 | 0 | Low-quality    | Genome-fragment | 9.87  | 0     |
| S6-final-viral-combined_k141_44045   | 1146 | No  | NA   | 0 | 0 | Not-determined | Genome-fragment | NA    | 0     |
| S6-final-viral-combined_k141_36871   | 1761 | No  | NA   | 0 | 0 | Not-determined | Genome-fragment | NA    | 0     |
| S3_k141_83252                        | 7767 | No  | NA   | 0 | 1 | Low-quality    | Genome-fragment | 7.9   | 0     |
| S6-final-viral-combined_k141_19820   | 1100 | No  | NA   | 0 | 0 | Not-determined | Genome-fragment | NA    | 0     |
| S11-final-viral-combined_k141_22276  | 7778 | No  | NA   | 9 | 0 | Low-quality    | Genome-fragment | 15.85 | 0     |
| S1-final-viral-combined_k141_245366  | 7783 | No  | NA   | 0 | 0 | Low-quality    | Genome-fragment | 20.04 | 0     |
| S8-final-viral-combined_k141_43976   | 7783 | Yes | 1631 | 1 | 6 | Low-quality    | Genome-fragment | 0.67  | 79.04 |
| S6-final-viral-combined_k141_126217  | 2285 | No  | NA   | 0 | 0 | Not-determined | Genome-fragment | NA    | 0     |
| S9-final-viral-combined_k141_40344   | 7784 | No  | NA   | 0 | 2 | Low-quality    | Genome-fragment | 25.97 | 0     |
| S11-final-viral-combined_k141_152916 | 7786 | No  | NA   | 0 | 1 | Low-quality    | Genome-fragment | 14.79 | 0     |
| S6-final-viral-combined_k141_109023  | 1206 | No  | NA   | 0 | 0 | Not-determined | Genome-fragment | NA    | 0     |
| S3-final-viral-combined_k141_112101  | 7786 | Yes | 4925 | 1 | 1 | Low-quality    | Genome-fragment | 8.57  | 36.75 |
| S6-final-viral-combined_k141_91822   | 1462 | No  | NA   | 0 | 0 | Not-determined | Genome-fragment | NA    | 0     |
| S6-final-viral-combined_k141_15667   | 1206 | No  | NA   | 0 | 0 | Not-determined | Genome-fragment | NA    | 0     |
| S11-final-viral-combined_k141_14500  | 7794 | No  | NA   | 5 | 0 | Low-quality    | Genome-fragment | 19.05 | 0     |
| S6-final-viral-combined_k141_86345   | 1325 | No  | NA   | 0 | 0 | Not-determined | Genome-fragment | NA    | 0     |
| S12_k141_351719                      | 7794 | No  | NA   | 0 | 3 | Low-quality    | Genome-fragment | 2.24  | 0     |
| S17-final-viral-combined_k141_194993 | 7795 | No  | NA   | 0 | 0 | Low-quality    | Genome-fragment | 6.9   | 0     |
| S4-final-viral-combined_k141_86049   | 7796 | No  | NA   | 0 | 2 | Low-quality    | Genome-fragment | 17.5  | 0     |
| S6-final-viral-combined_k141_121082  | 1128 | No  | NA   | 0 | 0 | Not-determined | Genome-fragment | NA    | 0     |
| S6-final-viral-combined_k141_80170   | 1150 | No  | NA   | 0 | 2 | Not-determined | Genome-fragment | NA    | 0     |
| S11_k141_155691                      | 7805 | No  | NA   | 0 | 2 | Low-quality    | Genome-fragment | 3.15  | 0     |
| S6-final-viral-combined_k141_5704    | 1067 | No  | NA   | 0 | 0 | Not-determined | Genome-fragment | NA    | 0     |
| S17-k141_129986                      | 7806 | No  | NA   | 0 | 3 | Low-quality    | Genome-fragment | 17.38 | 0     |
| S8_k141_110493                       | 7806 | No  | NA   | 7 | 0 | Low-quality    | Genome-fragment | 16.77 | 0     |
| S6-final-viral-combined_k141_69854   | 1012 | No  | NA   | 0 | 0 | Not-determined | Genome-fragment | NA    | 0     |
| S8_k141_274052                       | 7806 | No  | NA   | 1 | 0 | Low-quality    | Genome-fragment | 17.21 | 0     |
| S11_k141_184386                      | 7811 | No  | NA   | 1 | 1 | Low-quality    | Genome-fragment | 4.24  | 0     |
| S2-final-viral-combined_k141_240629  | 7811 | No  | NA   | 0 | 4 | Low-quality    | Genome-fragment | 3.98  | 0     |
| S9-final-viral-combined_k141_127271  | 7814 | No  | NA   | 2 | 1 | Low-quality    | Genome-fragment | 2.88  | 0     |
| S6-final-viral-combined_k141_93372   | 2096 | No  | NA   | 0 | 0 | Not-determined | Genome-fragment | NA    | 0     |
| S8-final-viral-combined_k141_255389  | 7816 | No  | NA   | 0 | 4 | Low-quality    | Genome-fragment | 2.43  | 0     |
| S6-final-viral-combined_k141_122136  | 1491 | No  | NA   | 0 | 0 | Not-determined | Genome-fragment | NA    | 0     |
| S6-final-viral-combined_k141_128607  | 1084 | No  | NA   | 0 | 0 | Not-determined | Genome-fragment | NA    | 0     |
| S6-final-viral-combined_k141_81398   | 1084 | No  | NA   | 0 | 0 | Not-determined | Genome-fragment | NA    | 0     |
| S6-final-viral-combined_k141_134451  | 1839 | No  | NA   | 0 | 0 | Not-determined | Genome-fragment | NA    | 0     |
| S6-final-viral-combined_k141_117211  | 1674 | No  | NA   | 0 | 1 | Not-determined | Genome-fragment | NA    | 0     |
| S1_k141_166724                       | 7823 | No  | NA   | 0 | 4 | Low-quality    | Genome-fragment | 18.61 | 0     |
| S6_k141_43111                        | 1855 | No  | NA   | 0 | 0 | Not-determined | Genome-fragment | NA    | 0     |
| S6_k141_82215                        | 1131 | No  | NA   | 0 | 1 | Not-determined | Genome-fragment | NA    | 0     |
| S6_k141_129185                       | 3650 | No  | NA   | 0 | 6 | Not-determined | Genome-fragment | NA    | 0     |
| S6_k141_158742                       | 1197 | No  | NA   | 0 | 0 | Not-determined | Genome-fragment | NA    | 0     |
| S1_k141_340842                       | 7826 | No  | NA   | 0 | 3 | Low-quality    | Genome-fragment | 7.06  | 0     |
| S6_k141_129193                       | 1656 | No  | NA   | 0 | 0 | Not-determined | Genome-fragment | NA    | 0     |
| S6_k141_123234                       | 2863 | No  | NA   | 0 | 2 | Not-determined | Genome-fragment | NA    | 0     |
| S6_k141_129221                       | 1014 | No  | NA   | 0 | 1 | Not-determined | Genome-fragment | NA    | 0     |
| S4_k141_144978                       | 7829 | No  | NA   | 3 | 0 | Low-quality    | Genome-fragment | 16.61 | 0     |
| S6_k141_135115                       | 6814 | No  | NA   | 0 | 5 | Not-determined | Genome-fragment | NA    | 0     |
| S6_k141_114                          | 2050 | No  | NA   | 0 | 0 | Not-determined | Genome-fragment | NA    | 0     |
| S6_k141_41203                        | 4234 | No  | NA   | 0 | 3 | Not-determined | Genome-fragment | NA    | 0     |
| S6_k141_111635                       | 1027 | No  | NA   | 0 | 0 | Not-determined | Genome-fragment | NA    | 0     |
| S1-final-viral-combined_k141_148079  | 7830 | No  | NA   | 4 | 0 | Low-quality    | Genome-fragment | 16.74 | 0     |
| S6_k141_11847                        | 7361 | No  | NA   | 0 | 0 | Not-determined | Genome-fragment | NA    | 0     |
| S6_k141_105785                       | 1061 | No  | NA   | 0 | 0 | Not-determined | Genome-fragment | NA    | 0     |
| S6_k141_117475                       | 1451 | No  | NA   | 0 | 1 | Not-determined | Genome-fragment | NA    | 0     |
| S6_k141_17743                        | 7744 | No  | NA   | 0 | 6 | Not-determined | Genome-fragment | NA    | 0     |
| S6_k141_123402                       | 1387 | No  | NA   | 0 | 1 | Not-determined | Genome-fragment | NA    | 0     |
| S8_k141_142779                       | 7831 | No  | NA   | 7 | 0 | Low-quality    | Genome-fragment | 12.41 | 0     |
| S12-final-viral-combined_k141_176128 | 7835 | No  | NA   | 2 | 0 | Low-quality    | Genome-fragment | 11.55 | 0     |
| S6_k141_239                          | 3558 | No  | NA   | 0 | 2 | Not-determined | Genome-fragment | NA    | 0     |
| S12_k141_368517                      | 7835 | No  | NA   | 1 | 3 | Low-quality    | Genome-fragment | 4.04  | 0     |
| S6_k141_94118                        | 1367 | No  | NA   | 0 | 0 | Not-determined | Genome-fragment | NA    | 0     |
| S6_k141_94134                        | 1378 | No  | NA   | 0 | 0 | Not-determined | Genome-fragment | NA    | 0     |
| S6_k141_58920                        | 3129 | No  | NA   | 0 | 3 | Not-determined | Genome-fragment | NA    | 0     |
| S6_k141_105887                       | 1450 | No  | NA   | 0 | 0 | Not-determined | Genome-fragment | NA    | 0     |
| S6_k141_35385                        | 1349 | No  | NA   | 0 | 0 | Not-determined | Genome-fragment | NA    | 0     |
| S6_k141_41263                        | 3534 | No  | NA   | 0 | 0 | Not-determined | Genome-fragment | NA    | 0     |
| S6_k141_70623                        | 2717 | No  | NA   | 0 | 1 | Not-determined | Genome-fragment | NA    | 0     |
| S6_k141_76538                        | 1988 | No  | NA   | 0 | 0 | Not-determined | Genome-fragment | NA    | 0     |
| S6_k141_70637                        | 5239 | No  | NA   | 0 | 0 | Not-determined | Genome-fragment | NA    | 0     |
| S6_k141_117615                       | 1080 | No  | NA   | 0 | 2 | Not-determined | Genome-fragment | NA    | 0     |
| S6_k141_147199                       | 5362 | No  | NA   | 0 | 1 | Not-determined | Genome-fragment | NA    | 0     |
| S6_k141_47204                        | 3407 | No  | NA   | 0 | 0 | Not-determined | Genome-fragment | NA    | 0     |
| S6_k141_64812                        | 2544 | No  | NA   | 0 | 0 | Not-determined | Genome-fragment | NA    | 0     |
| S6_k141_12004                        | 3686 | No  | NA   | 0 | 1 | Not-determined | Genome-fragment | NA    | 0     |
| S6_k141_76571                        | 3412 | No  | NA   | 0 | 1 | Not-determined | Genome-fragment | NA    | 0     |
| S6_k141_111852                       | 4683 | No  | NA   | 0 | 2 | Not-determined | Genome-fragment | NA    | 0     |
| S1_k141_74706                        | 7836 | No  | NA   | 0 | 1 | Low-quality    | Genome-fragment | 7.78  | 0     |
| S6_k141_64859                        | 1318 | No  | NA   | 0 | 0 | Not-determined | Genome-fragment | NA    | 0     |
| S6_k141_105995                       | 1792 | No  | NA   | 0 | 0 | Not-determined | Genome-fragment | NA    | 0     |
| S6_k141_105996                       | 1117 | No  | NA   | 0 | 0 | Not-determined | Genome-fragment | NA    | 0     |
| S6_k141_106008                       | 1282 | No  | NA   | 0 | 0 | Not-determined | Genome-fragment | NA    | 0     |
| S6_k141_70699                        | 1650 | No  | NA   | 0 | 0 | Not-determined | Genome-fragment | NA    | 0     |
| S6_k141_70706                        | 3344 | No  | NA   | 0 | 2 | Not-determined | Genome-fragment | NA    | 0     |
| S17-final-viral-combined_k141_49153  | 7840 | No  | NA   | 5 | 1 | Low-quality    | Genome-fragment | 4.22  | 0     |
| S6_k141_59062                        | 1561 | No  | NA   | 0 | 2 | Not-determined | Genome-fragment | NA    | 0     |
| S6_k141_70745                        | 1653 | No  | NA   | 0 | 1 | Not-determined | Genome-fragment | NA    | 0     |
| S6_k141_35541                        | 5300 | No  | NA   | 0 | 2 | Not-determined | Genome-fragment | NA    | 0     |
| S6_k141_12142                        | 3216 | No  | NA   | 0 | 1 | Not-determined | Genome-fragment | NA    | 0     |
| S6_k141_29549                        | 2449 | No  | NA   | 0 | 0 | Not-determined | Genome-fragment | NA    | 0     |
| S6_k141_450                          | 1086 | No  | NA   | 0 | 1 | Not-determined | Genome-fragment | NA    | 0     |
| S11_k141_157614                      | 7841 | No  | NA   | 1 | 0 | Low-quality    | Genome-fragment | 16.06 | 0     |
| S6_k141_70812                        | 5425 | No  | NA   | 0 | 2 | Not-determined | Genome-fragment | NA    | 0     |
| S6_k141_59098                        | 2100 | No  | NA   | 0 | 1 | Not-determined | Genome-fragment | NA    | 0     |
| S6_k141_5087                         | 1708 | No  | NA   | 0 | 1 | Not-determined | Genome-fragment | NA    | 0     |
| S6_k141_12184                        | 3708 | No  | NA   | 0 | 3 | Not-determined | Genome-fragment | NA    | 0     |
| S6_k141_64906                        | 1046 | No  | NA   | 0 | 1 | Not-determined | Genome-fragment | NA    | 0     |
| S7_k141_47264                        | 7845 | Yes | 5117 | 1 | 1 | Low-quality    | Genome-fragment | 0.41  | 34.77 |
| S6_k141_29712                        | 3250 | No  | NA   | 0 | 0 | Not-determined | Genome-fragment | NA    | 0     |
| S6_k141_117763                       | 1023 | No  | NA   | 0 | 0 | Not-determined | Genome-fragment | NA    | 0     |
| S6_k141_542                          | 3487 | No  | NA   | 0 | 2 | Not-determined | Genome-fragment | NA    | 0     |
| S6_k141_29722                        | 3600 | No  | NA   | 0 | 0 | Not-determined | Genome-fragment | NA    | 0     |
| S6_k141_88508                        | 1778 | No  | NA   | 0 | 2 | Not-determined | Genome-fragment | NA    | 0     |
| S6_k141_123710                       | 1094 | No  | NA   | 0 | 1 | Not-determined | Genome-fragment | NA    | 0     |
| S6_k141_24446                        | 4668 | No  | NA   | 0 | 2 | Not-determined | Genome-fragment | NA    | 0     |
| S5-final-viral-combined_k141_102211  | 7850 | No  | NA   | 3 | 0 | Low-quality    | Genome-fragment | 21.1  | 0     |
| S6_k141_76712                        | 1460 | No  | NA   | 0 | 1 | Not-determined | Genome-fragment | NA    | 0     |
| S3-final-viral-combined_k141_34081   | 7850 | No  | NA   | 3 | 0 | Low-quality    | Genome-fragment | 20.78 | 0     |
| S6_k141_12278                        | 3377 | No  | NA   | 0 | 0 | Not-determined | Genome-fragment | NA    | 0     |
| S5-final-viral-combined_k141_77012   | 7852 | No  | NA   | 3 | 0 | Low-quality    | Genome-fragment | 13.24 | 0     |
| S8-final-viral-combined_k141_140434  | 7855 | No  | NA   | 2 | 0 | Low-quality    | Genome-fragment | 17.69 | 0     |
| S1-final-viral-combined_k141_167448  | 7856 | No  | NA   | 0 | 2 | Low-quality    | Genome-fragment | 10.2  | 0     |
| S6_k141_71001                        | 4426 | No  | NA   | 0 | 3 | Not-determined | Genome-fragment | NA    | 0     |
| S6_k141_12328                        | 4099 | No  | NA   | 0 | 1 | Not-determined | Genome-fragment | NA    | 0     |
| S9_k141_59480                        | 7857 | No  | NA   | 6 | 0 | Low-quality    | Genome-fragment | 13.52 | 0     |
| S6_k141_82588                        | 3275 | No  | NA   | 0 | 1 | Not-determined | Genome-fragment | NA    | 0     |
| S11-final-viral-combined_k141_105940 | 7857 | No  | NA   | 4 | 0 | Low-quality    | Genome-fragment | 14.44 | 0     |
| S6_k141_82590                        | 3335 | No  | NA   | 0 | 3 | Not-determined | Genome-fragment | NA    | 0     |
| S6_k141_135293                       | 3037 | No  | NA   | 0 | 0 | Not-determined | Genome-fragment | NA    | 0     |
| S6_k141_82592                        | 2689 | No  | NA   | 0 | 2 | Not-determined | Genome-fragment | NA    | 0     |
| S6_k141_643                          | 8283 | No  | NA   | 0 | 8 | Not-determined | Genome-fragment | NA    | 0     |
| S6-final-viral-combined_k141_4541    | 7857 | No  | NA   | 0 | 0 | Low-quality    | Genome-fragment | 2.99  | 0     |
| S4_k141_127765                       | 7858 | No  | NA   | 1 | 0 | Low-quality    | Genome-fragment | 14.43 | 0     |
| S7-final-viral-combined_k141_233435  | 7859 | No  | NA   | 9 | 1 | Low-quality    | Genome-fragment | 19.33 | 0     |
| S6_k141_117906                       | 1590 | No  | NA   | 0 | 0 | Not-determined | Genome-fragment | NA    | 0     |
| S1-final-viral-combined_k141_137853  | 7860 | No  | NA   | 2 | 0 | Low-quality    | Genome-fragment | 23.87 | 0     |
| S6_k141_88726                        | 3446 | No  | NA   | 0 | 3 | Not-determined | Genome-fragment | NA    | 0     |
| S6_k141_100306                       | 1022 | No  | NA   | 0 | 1 | Not-determined | Genome-fragment | NA    | 0     |
| S11-final-viral-combined_k141_279098 | 7862 | No  | NA   | 0 | 4 | Low-quality    | Genome-fragment | 4.14  | 0     |
| S11_k141_115256                      | 7862 | No  | NA   | 1 | 0 | Low-quality    | Genome-fragment | 4.26  | 0     |
| S9-final-viral-combined_k141_73816   | 7870 | No  | NA   | 0 | 4 | Low-quality    | Genome-fragment | 3.88  | 0     |
| S6_k141_23954                        | 2436 | No  | NA   | 0 | 1 | Not-determined | Genome-fragment | NA    | 0     |
| S17-final-viral-combined_k141_253679 | 7870 | No  | NA   | 2 | 0 | Low-quality    | Genome-fragment | 8.3   | 0     |
| S6_k141_65170                        | 1336 | No  | NA   | 0 | 1 | Not-determined | Genome-fragment | NA    | 0     |
| S6_k14                               |      |     |      |   |   |                |                 |       |       |



|                                            |       |    |    |    |   |                |                 |       |   |
|--------------------------------------------|-------|----|----|----|---|----------------|-----------------|-------|---|
| 56_k141_53342                              | 1230  | No | NA | 0  | 1 | Not-determined | Genome-fragment | NA    | 0 |
| 56_k141_5669                               | 1277  | No | NA | 0  | 1 | Not-determined | Genome-fragment | NA    | 0 |
| 56_k141_30133                              | 3326  | No | NA | 0  | 1 | Not-determined | Genome-fragment | NA    | 0 |
| 56_k141_24140                              | 1836  | No | NA | 0  | 1 | Not-determined | Genome-fragment | NA    | 0 |
| 56_k141_65479                              | 2139  | No | NA | 0  | 2 | Not-determined | Genome-fragment | NA    | 0 |
| 56_k141_89182                              | 2941  | No | NA | 0  | 2 | Not-determined | Genome-fragment | NA    | 0 |
| 56_k141_77043                              | 5198  | No | NA | 0  | 1 | Not-determined | Genome-fragment | NA    | 0 |
| 56_k141_6792                               | 1005  | No | NA | 0  | 1 | Not-determined | Genome-fragment | NA    | 0 |
| 54-final-viral-combined_k141_31986[Full]   | 7887  | No | NA | 7  | 0 | Low-quality    | Genome-fragment | 21.67 | 0 |
| 56_k141_95046                              | 4010  | No | NA | 0  | 2 | Not-determined | Genome-fragment | NA    | 0 |
| 56_k141_82907                              | 1214  | No | NA | 0  | 1 | Not-determined | Genome-fragment | NA    | 0 |
| 56_k141_12616                              | 7485  | No | NA | 0  | 6 | Not-determined | Genome-fragment | NA    | 0 |
| 56_k141_12618                              | 3686  | No | NA | 0  | 0 | Not-determined | Genome-fragment | NA    | 0 |
| 56_k141_124191                             | 3333  | No | NA | 0  | 0 | Not-determined | Genome-fragment | NA    | 0 |
| 55_k141_204523                             | 7895  | No | NA | 0  | 4 | Low-quality    | Genome-fragment | 6.99  | 0 |
| 56_k141_130016                             | 1220  | No | NA | 0  | 0 | Not-determined | Genome-fragment | NA    | 0 |
| 57-final-viral-combined_k141_37304[Full]   | 7898  | No | NA | 3  | 0 | Low-quality    | Genome-fragment | 17.1  | 0 |
| 57-final-viral-combined_k141_196091[Full]  | 7899  | No | NA | 1  | 0 | Low-quality    | Genome-fragment | 18.55 | 0 |
| 56_k141_135637                             | 5682  | No | NA | 1  | 2 | Not-determined | Genome-fragment | NA    | 0 |
| 56_k141_30330                              | 1112  | No | NA | 0  | 2 | Not-determined | Genome-fragment | NA    | 0 |
| 51_k141_295557                             | 7901  | No | NA | 0  | 2 | Low-quality    | Genome-fragment | 7.42  | 0 |
| 56_k141_55657                              | 3261  | No | NA | 0  | 1 | Not-determined | Genome-fragment | NA    | 0 |
| 517-final-viral-combined_k141_32208[Full]  | 7904  | No | NA | 0  | 5 | Low-quality    | Genome-fragment | 3.94  | 0 |
| 56_k141_30349                              | 1278  | No | NA | 0  | 0 | Not-determined | Genome-fragment | NA    | 0 |
| 56_k141_124254                             | 1381  | No | NA | 0  | 1 | Not-determined | Genome-fragment | NA    | 0 |
| 51_k141_17777                              | 7905  | No | NA | 1  | 0 | Low-quality    | Genome-fragment | 9.78  | 0 |
| 511-final-viral-combined_k141_216831[Full] | 7906  | No | NA | 0  | 5 | Low-quality    | Genome-fragment | 13.04 | 0 |
| 56_k141_6914                               | 1870  | No | NA | 0  | 1 | Not-determined | Genome-fragment | NA    | 0 |
| 56_k141_71445                              | 7118  | No | NA | 0  | 7 | Not-determined | Genome-fragment | NA    | 0 |
| 56_k141_65671                              | 1202  | No | NA | 0  | 2 | Not-determined | Genome-fragment | NA    | 0 |
| 56_k141_65673                              | 2705  | No | NA | 0  | 1 | Not-determined | Genome-fragment | NA    | 0 |
| 56_k141_124282                             | 1324  | No | NA | 0  | 0 | Not-determined | Genome-fragment | NA    | 0 |
| 56_k141_118084                             | 6462  | No | NA | 0  | 1 | Not-determined | Genome-fragment | NA    | 0 |
| 56_k141_18214                              | 4069  | No | NA | 0  | 1 | Not-determined | Genome-fragment | NA    | 0 |
| 56_k141_112320                             | 1225  | No | NA | 0  | 2 | Not-determined | Genome-fragment | NA    | 0 |
| 56_k141_65689                              | 5965  | No | NA | 1  | 0 | Not-determined | Genome-fragment | NA    | 0 |
| 58-final-viral-combined_k141_127137[Full]  | 7906  | No | NA | 0  | 0 | Low-quality    | Genome-fragment | 15.69 | 0 |
| 59-final-viral-combined_k141_117641[Full]  | 7910  | No | NA | 1  | 1 | Low-quality    | Genome-fragment | 18.72 | 0 |
| 56_k141_118107                             | 1023  | No | NA | 0  | 1 | Not-determined | Genome-fragment | NA    | 0 |
| 56_k141_83046                              | 1206  | No | NA | 0  | 0 | Not-determined | Genome-fragment | NA    | 0 |
| 56_k141_1390                               | 2276  | No | NA | 0  | 1 | Not-determined | Genome-fragment | NA    | 0 |
| 56_k141_106733                             | 1617  | No | NA | 0  | 0 | Not-determined | Genome-fragment | NA    | 0 |
| 56_k141_77199                              | 10430 | No | NA | 0  | 1 | Not-determined | Genome-fragment | NA    | 0 |
| 56_k141_59845                              | 3344  | No | NA | 0  | 0 | Not-determined | Genome-fragment | NA    | 0 |
| 56_k141_36044                              | 1707  | No | NA | 0  | 4 | Not-determined | Genome-fragment | NA    | 0 |
| 52_k141_175509                             | 7917  | No | NA | 0  | 1 | Low-quality    | Genome-fragment | 17.72 | 0 |
| 517-final-viral-combined_k141_88375[Full]  | 7920  | No | NA | 5  | 0 | Low-quality    | Genome-fragment | 23.3  | 0 |
| 56_k141_135704                             | 5821  | No | NA | 0  | 4 | Not-determined | Genome-fragment | NA    | 0 |
| 56_k141_138176                             | 1010  | No | NA | 0  | 0 | Not-determined | Genome-fragment | NA    | 0 |
| 58-final-viral-combined_k141_245402[Full]  | 7921  | No | NA | 2  | 0 | Low-quality    | Genome-fragment | 17.25 | 0 |
| 56_k141_124364                             | 1021  | No | NA | 0  | 1 | Not-determined | Genome-fragment | NA    | 0 |
| 56_k141_93124                              | 5810  | No | NA | 0  | 2 | Not-determined | Genome-fragment | NA    | 0 |
| 56_k141_30508                              | 1037  | No | NA | 0  | 1 | Not-determined | Genome-fragment | NA    | 0 |
| 59_k141_96110                              | 7923  | No | NA | 0  | 2 | Low-quality    | Genome-fragment | 2.95  | 0 |
| 56_k141_59805                              | 1126  | No | NA | 0  | 0 | Not-determined | Genome-fragment | NA    | 0 |
| 56_k141_12776                              | 4213  | No | NA | 0  | 1 | Not-determined | Genome-fragment | NA    | 0 |
| 511-final-viral-combined_k141_297297[Full] | 7924  | No | NA | 1  | 1 | Low-quality    | Genome-fragment | 12.97 | 0 |
| 56_k141_12781                              | 6155  | No | NA | 0  | 1 | Not-determined | Genome-fragment | NA    | 0 |
| 56_k141_12798                              | 10820 | No | NA | 0  | 4 | Not-determined | Genome-fragment | NA    | 0 |
| 56_k141_36201                              | 1531  | No | NA | 0  | 1 | Not-determined | Genome-fragment | NA    | 0 |
| 56_k141_42393                              | 1273  | No | NA | 0  | 0 | Not-determined | Genome-fragment | NA    | 0 |
| 51_k141_129700                             | 7924  | No | NA | 1  | 1 | Low-quality    | Genome-fragment | 9.92  | 0 |
| 56_k141_100775                             | 3091  | No | NA | 0  | 2 | Not-determined | Genome-fragment | NA    | 0 |
| 56_k141_94551                              | 7924  | No | NA | 3  | 0 | Low-quality    | Genome-fragment | 18.86 | 0 |
| 56_k141_135812                             | 1459  | No | NA | 0  | 1 | Not-determined | Genome-fragment | NA    | 0 |
| 56_k141_48241                              | 1075  | No | NA | 0  | 1 | Not-determined | Genome-fragment | NA    | 0 |
| 56_k141_42480                              | 2477  | No | NA | 0  | 1 | Not-determined | Genome-fragment | NA    | 0 |
| 56_k141_95127                              | 1814  | No | NA | 0  | 1 | Not-determined | Genome-fragment | NA    | 0 |
| 56-final-viral-combined_k141_31647[Full]   | 7927  | No | NA | 1  | 1 | Low-quality    | Genome-fragment | 3.09  | 0 |
| 56_k141_18488                              | 1028  | No | NA | 0  | 0 | Not-determined | Genome-fragment | NA    | 0 |
| 56_k141_48279                              | 1014  | No | NA | 0  | 2 | Not-determined | Genome-fragment | NA    | 0 |
| 56_k141_42502                              | 3722  | No | NA | 0  | 1 | Not-determined | Genome-fragment | NA    | 0 |
| 51-final-viral-combined_k141_457[Full]     | 7928  | No | NA | 0  | 4 | Low-quality    | Genome-fragment | 3.99  | 0 |
| 56-final-viral-combined_k141_39441[Full]   | 7932  | No | NA | 1  | 1 | Low-quality    | Genome-fragment | 13.86 | 0 |
| 56_k141_12874                              | 1053  | No | NA | 0  | 1 | Not-determined | Genome-fragment | NA    | 0 |
| 56_k141_89576                              | 1044  | No | NA | 0  | 1 | Not-determined | Genome-fragment | NA    | 0 |
| 56_k141_95367                              | 7603  | No | NA | 0  | 7 | Not-determined | Genome-fragment | NA    | 0 |
| 56_k141_77461                              | 1879  | No | NA | 0  | 3 | Not-determined | Genome-fragment | NA    | 0 |
| 58_k141_108395                             | 7934  | No | NA | 0  | 1 | Low-quality    | Genome-fragment | 13.16 | 0 |
| 51-final-viral-combined_k141_85248[Full]   | 7935  | No | NA | 0  | 0 | Low-quality    | Genome-fragment | 18.82 | 0 |
| 56_k141_112637                             | 2523  | No | NA | 0  | 1 | Not-determined | Genome-fragment | NA    | 0 |
| 512-final-viral-combined_k141_329184[Full] | 7940  | No | NA | 9  | 0 | Low-quality    | Genome-fragment | 19.73 | 0 |
| 56_k141_53584                              | 1646  | No | NA | 0  | 1 | Not-determined | Genome-fragment | NA    | 0 |
| 56_k141_60137                              | 1048  | No | NA | 0  | 1 | Not-determined | Genome-fragment | NA    | 0 |
| 56_k141_12925                              | 3560  | No | NA | 0  | 2 | Not-determined | Genome-fragment | NA    | 0 |
| 56_k141_18598                              | 1698  | No | NA | 0  | 2 | Not-determined | Genome-fragment | NA    | 0 |
| 56_k141_24522                              | 1499  | No | NA | 0  | 1 | Not-determined | Genome-fragment | NA    | 0 |
| 56_k141_24533                              | 3395  | No | NA | 0  | 1 | Not-determined | Genome-fragment | NA    | 0 |
| 57-final-viral-combined_k141_135377[Full]  | 7945  | No | NA | 1  | 0 | Low-quality    | Genome-fragment | 18.36 | 0 |
| 56_k141_7284                               | 2229  | No | NA | 0  | 1 | Not-determined | Genome-fragment | NA    | 0 |
| 56_k141_83437                              | 6148  | No | NA | 0  | 3 | Not-determined | Genome-fragment | NA    | 0 |
| 56_k141_1762                               | 3975  | No | NA | 0  | 1 | Not-determined | Genome-fragment | NA    | 0 |
| 56_k141_42635                              | 5929  | No | NA | 0  | 0 | Not-determined | Genome-fragment | NA    | 0 |
| 56_k141_77517                              | 2123  | No | NA | 0  | 2 | Not-determined | Genome-fragment | NA    | 0 |
| 517-final-viral-combined_k141_22422[Full]  | 7946  | No | NA | 0  | 0 | Low-quality    | Genome-fragment | 20.99 | 0 |
| 51-final-viral-combined_k141_231087[Full]  | 7951  | No | NA | 0  | 6 | Low-quality    | Genome-fragment | 13.99 | 0 |
| 53-final-viral-combined_k141_60447[Full]   | 7956  | No | NA | 3  | 0 | Low-quality    | Genome-fragment | 5.24  | 0 |
| 56_k141_95491                              | 4281  | No | NA | 0  | 0 | Not-determined | Genome-fragment | NA    | 0 |
| 517-final-viral-combined_k141_323600[Full] | 7957  | No | NA | 1  | 1 | Low-quality    | Genome-fragment | 4.88  | 0 |
| 56_k141_42678                              | 1161  | No | NA | 0  | 0 | Not-determined | Genome-fragment | NA    | 0 |
| 56_k141_107173                             | 1065  | No | NA | 0  | 0 | Not-determined | Genome-fragment | NA    | 0 |
| 512-final-viral-combined_k141_5646[Full]   | 7960  | No | NA | 0  | 1 | Low-quality    | Genome-fragment | 12.22 | 0 |
| 56_k141_71704                              | 1553  | No | NA | 0  | 1 | Not-determined | Genome-fragment | NA    | 0 |
| 51_k141_389486                             | 7963  | No | NA | 2  | 0 | Low-quality    | Genome-fragment | 21.99 | 0 |
| 52-final-viral-combined_k141_100234[Full]  | 7965  | No | NA | 3  | 0 | Low-quality    | Genome-fragment | 16.51 | 0 |
| 512_k141_297325                            | 7968  | No | NA | 7  | 1 | Low-quality    | Genome-fragment | 18.66 | 0 |
| 56_k141_71741                              | 9193  | No | NA | 0  | 3 | Not-determined | Genome-fragment | NA    | 0 |
| 56_k141_53724                              | 1264  | No | NA | 0  | 0 | Not-determined | Genome-fragment | NA    | 0 |
| 56_k141_42726                              | 1182  | No | NA | 0  | 0 | Not-determined | Genome-fragment | NA    | 0 |
| 56_k141_71744                              | 4010  | No | NA | 0  | 1 | Not-determined | Genome-fragment | NA    | 0 |
| 59-final-viral-combined_k141_127211[Full]  | 7971  | No | NA | 10 | 0 | Low-quality    | Genome-fragment | 23.25 | 0 |
| 56_k141_42738                              | 1440  | No | NA | 0  | 1 | Not-determined | Genome-fragment | NA    | 0 |
| 56_k141_7358                               | 1183  | No | NA | 0  | 1 | Not-determined | Genome-fragment | NA    | 0 |
| 56_k141_66301                              | 7980  | No | NA | 0  | 3 | Low-quality    | Genome-fragment | 8.29  | 0 |
| 56_k141_20882                              | 2439  | No | NA | 0  | 1 | Not-determined | Genome-fragment | NA    | 0 |
| 56_k141_7381                               | 1603  | No | NA | 0  | 0 | Not-determined | Genome-fragment | NA    | 0 |
| 52_k141_192737                             | 7982  | No | NA | 2  | 1 | Low-quality    | Genome-fragment | 13.15 | 0 |
| 58-final-viral-combined_k141_252243[Full]  | 7984  | No | NA | 0  | 1 | Low-quality    | Genome-fragment | 15.19 | 0 |
| 56_k141_95596                              | 1006  | No | NA | 0  | 1 | Not-determined | Genome-fragment | NA    | 0 |
| 56_k141_60400                              | 1804  | No | NA | 0  | 0 | Not-determined | Genome-fragment | NA    | 0 |
| 512-final-viral-combined_k141_243408[Full] | 7985  | No | NA | 2  | 0 | Low-quality    | Genome-fragment | 13.56 | 0 |
| 56_k141_13061                              | 1545  | No | NA | 0  | 1 | Not-determined | Genome-fragment | NA    | 0 |
| 56_k141_89866                              | 3526  | No | NA | 0  | 2 | Not-determined | Genome-fragment | NA    | 0 |
| 56_k141_136106                             | 3609  | No | NA | 0  | 2 | Not-determined | Genome-fragment | NA    | 0 |
| 56_k141_24616                              | 1008  | No | NA | 0  | 2 | Not-determined | Genome-fragment | NA    | 0 |
| 56_k141_36476                              | 1067  | No | NA | 0  | 1 | Not-determined | Genome-fragment | NA    | 0 |
| 512_k141_339999                            | 7986  | No | NA | 1  | 0 | Low-quality    | Genome-fragment | 3.67  | 0 |
| 52_k141_44033                              | 7986  | No | NA | 0  | 1 | Low-quality    | Genome-fragment | 2.8   | 0 |
| 56_k141_124650                             | 1029  | No | NA | 0  | 0 | Not-determined | Genome-fragment | NA    | 0 |
| 56_k141_42809                              | 3486  | No | NA | 0  | 0 | Not-determined | Genome-fragment | NA    | 0 |
| 56_k141_42833                              | 1060  | No | NA | 0  | 1 | Not-determined | Genome-fragment | NA    | 0 |
| 56_k141_38813                              | 1047  | No | NA | 0  | 0 | Not-determined | Genome-fragment | NA    | 0 |
| 57-final-viral-combined_k141_22167[Full]   | 7987  | No | NA | 1  | 1 | Low-quality    | Genome-fragment | 17.05 | 0 |
| 56_k141_107400                             | 1183  | No | NA | 0  | 1 | Not-determined | Genome-fragment | NA    | 0 |
| 56_k141_130642                             | 1829  | No | NA | 0  | 1 | Not-determined | Genome-fragment | NA    | 0 |
| 55-final-viral-combined_k141_176302[Full]  | 7990  | No | NA | 3  | 0 | Low-quality    | Genome-fragment | 17.32 | 0 |
| 56_k141_60503                              | 1003  | No | NA | 0  | 1 | Not-determined | Genome-fragment | NA    | 0 |
| 56_k141_7464                               | 1310  | No | NA | 0  | 0 | Not-determined | Genome-fragment | NA    | 0 |
| 56_k141_77688                              | 1690  | No | NA | 0  | 2 | Not-determined | Genome-fragment | NA    | 0 |
| 56_k141_112826                             | 1373  | No | NA | 0  | 0 | Not-determined | Genome-fragment | NA    | 0 |
| 55-final-viral-combined_k141_132999[Full]  | 7991  | No | NA | 1  | 1 | Low-quality    | Genome-fragment | 5.2   | 0 |
| 56_k141_60527                              | 1451  | No | NA | 0  | 0 | Not-determined | Genome-fragment | NA    | 0 |
| 511-final-viral-combined_k141_327936[Full] | 7999  | No | NA | 0  | 3 | Low-quality    | Genome-fragment | 20.53 | 0 |
| 56_k141_77728                              | 4355  | No | NA | 0  | 1 | Not-determined | Genome-fragment | NA    | 0 |
| 56_k141                                    |       |    |    |    |   |                |                 |       |   |



|                                            |       |     |      |    |    |                |                 |                 |       |       |
|--------------------------------------------|-------|-----|------|----|----|----------------|-----------------|-----------------|-------|-------|
| 56_k141_36948                              | 5047  | No  | NA   | 0  | 1  | Not-determined | Genome-fragment | NA              |       | 0     |
| S5-final-viral-combined_k141_197118  full  | 8018  | No  | NA   | 5  | 4  | 0              | Low-quality     | Genome-fragment | 18.96 | 0     |
| 56_k141_77841                              | 13228 | No  | NA   | 0  | 6  | Not-determined | Genome-fragment | NA              | 0     | 0     |
| 56_k141_95869                              | 1315  | No  | NA   | 0  | 3  | Not-determined | Genome-fragment | NA              | 0     | 0     |
| 56_k141_31331                              | 1811  | No  | NA   | 0  | 1  | Not-determined | Genome-fragment | NA              | 0     | 0     |
| 56_k141_24844                              | 1847  | No  | NA   | 0  | 0  | Not-determined | Genome-fragment | NA              | 0     | 0     |
| 56_k141_95883                              | 5626  | No  | NA   | 0  | 3  | Not-determined | Genome-fragment | NA              | 0     | 0     |
| S17-final-viral-combined_k141_65800  full  | 8019  | No  | NA   | 3  | 0  | Low-quality    | Genome-fragment | NA              | 19.27 | 0     |
| 56_k141_7562                               | 1175  | No  | NA   | 0  | 1  | Not-determined | Genome-fragment | NA              | 0     | 0     |
| 56_k141_18977                              | 1072  | No  | NA   | 0  | 0  | Not-determined | Genome-fragment | NA              | 0     | 0     |
| 56_k141_2376                               | 3004  | No  | NA   | 0  | 2  | Not-determined | Genome-fragment | NA              | 0     | 0     |
| 56_k141_24070                              | 3166  | No  | NA   | 0  | 2  | Not-determined | Genome-fragment | NA              | 0     | 0     |
| S1_k141_238907                             | 8020  | No  | NA   | 0  | 0  | Low-quality    | Genome-fragment | NA              | 19.88 | 0     |
| S4_k141_116045                             | 8026  | No  | NA   | 0  | 1  | Low-quality    | Genome-fragment | NA              | 13.41 | 0     |
| 56_k141_31370                              | 1072  | No  | NA   | 0  | 0  | Not-determined | Genome-fragment | NA              | 0     | 0     |
| 56_k141_43447                              | 7317  | No  | NA   | 0  | 6  | Not-determined | Genome-fragment | NA              | 0     | 0     |
| 56_k141_60834                              | 2100  | No  | NA   | 0  | 3  | Not-determined | Genome-fragment | NA              | 0     | 0     |
| 56_k141_7631                               | 3476  | No  | NA   | 0  | 3  | Not-determined | Genome-fragment | NA              | 0     | 0     |
| 56_k141_118786                             | 3521  | No  | NA   | 0  | 1  | Not-determined | Genome-fragment | NA              | 0     | 0     |
| 56_k141_66554                              | 1219  | No  | NA   | 0  | 2  | Not-determined | Genome-fragment | NA              | 0     | 0     |
| 56_k141_43303                              | 3673  | No  | NA   | 0  | 3  | Not-determined | Genome-fragment | NA              | 0     | 0     |
| S12_k141_348840                            | 8025  | No  | NA   | 3  | 2  | Low-quality    | Genome-fragment | NA              | 20.4  | 0     |
| 56_k141_136600                             | 6407  | No  | NA   | 0  | 2  | Not-determined | Genome-fragment | NA              | 0     | 0     |
| 56_k141_113194                             | 4228  | No  | NA   | 0  | 2  | Not-determined | Genome-fragment | NA              | 0     | 0     |
| 56_k141_77927                              | 2225  | No  | NA   | 0  | 0  | Not-determined | Genome-fragment | NA              | 0     | 0     |
| 56_k141_77941                              | 1059  | No  | NA   | 0  | 1  | Not-determined | Genome-fragment | NA              | 0     | 0     |
| 56_k141_77967                              | 1337  | No  | NA   | 0  | 0  | Not-determined | Genome-fragment | NA              | 0     | 0     |
| 56_k141_113262                             | 3784  | No  | NA   | 0  | 3  | Not-determined | Genome-fragment | NA              | 0     | 0     |
| S2_k141_165691                             | 8038  | No  | NA   | 4  | 0  | Low-quality    | Genome-fragment | NA              | 7.83  | 0     |
| 56_k141_66699                              | 7413  | No  | NA   | 0  | 5  | Not-determined | Genome-fragment | NA              | 0     | 0     |
| 56_k141_125199                             | 1423  | No  | NA   | 0  | 0  | Not-determined | Genome-fragment | NA              | 0     | 0     |
| 56_k141_43406                              | 2338  | No  | NA   | 0  | 1  | Not-determined | Genome-fragment | NA              | 0     | 0     |
| 56_k141_25100                              | 4822  | No  | NA   | 0  | 2  | Not-determined | Genome-fragment | NA              | 0     | 0     |
| 56_k141_2649                               | 3185  | No  | NA   | 0  | 4  | Not-determined | Genome-fragment | NA              | 0     | 0     |
| 56_k141_37160                              | 1220  | No  | NA   | 0  | 2  | Not-determined | Genome-fragment | NA              | 0     | 0     |
| 56_k141_83841                              | 3718  | No  | NA   | 0  | 1  | Not-determined | Genome-fragment | NA              | 0     | 0     |
| S4_k141_91986                              | 8038  | No  | NA   | 0  | 2  | Low-quality    | Genome-fragment | NA              | 17.29 | 0     |
| 56_k141_83942                              | 1815  | No  | NA   | 0  | 2  | Not-determined | Genome-fragment | NA              | 0     | 0     |
| 56_k141_78068                              | 10262 | No  | NA   | 0  | 3  | Not-determined | Genome-fragment | NA              | 0     | 0     |
| 56_k141_83959                              | 1456  | No  | NA   | 0  | 1  | Not-determined | Genome-fragment | NA              | 0     | 0     |
| 56_k141_66795                              | 1052  | No  | NA   | 0  | 0  | Not-determined | Genome-fragment | NA              | 0     | 0     |
| 56_k141_25161                              | 1052  | No  | NA   | 0  | 2  | Not-determined | Genome-fragment | NA              | 0     | 0     |
| 56_k141_37224                              | 1502  | No  | NA   | 0  | 0  | Not-determined | Genome-fragment | NA              | 0     | 0     |
| 56_k141_84000                              | 1259  | No  | NA   | 0  | 1  | Not-determined | Genome-fragment | NA              | 0     | 0     |
| 56_k141_60993                              | 3550  | No  | NA   | 0  | 7  | Not-determined | Genome-fragment | NA              | 0     | 0     |
| 56_k141_107754                             | 1282  | No  | NA   | 0  | 1  | Not-determined | Genome-fragment | NA              | 0     | 0     |
| S12_k141_62305                             | 8050  | No  | NA   | 1  | 0  | Low-quality    | Genome-fragment | NA              | 25.06 | 0     |
| 56_k141_118996                             | 1170  | No  | NA   | 0  | 0  | Not-determined | Genome-fragment | NA              | 0     | 0     |
| 56_k141_101199                             | 1947  | No  | NA   | 0  | 2  | Not-determined | Genome-fragment | NA              | 0     | 0     |
| 56_k141_72335                              | 2078  | No  | NA   | 0  | 1  | Not-determined | Genome-fragment | NA              | 0     | 0     |
| S8_k141_19531                              | 8055  | No  | NA   | 6  | 2  | Low-quality    | Genome-fragment | NA              | 18.16 | 0     |
| 56_k141_61023                              | 21758 | No  | NA   | 0  | 14 | Not-determined | Genome-fragment | NA              | 0     | 0     |
| 56_k141_101254                             | 1324  | No  | NA   | 0  | 3  | Not-determined | Genome-fragment | NA              | 0     | 0     |
| 56_k141_131111                             | 8500  | No  | NA   | 0  | 13 | Not-determined | Genome-fragment | NA              | 0     | 0     |
| S17-k141_222840                            | 8062  | No  | NA   | 0  | 2  | Low-quality    | Genome-fragment | NA              | 7.98  | 0     |
| S12-final-viral-combined_k141_2501  full   | 8063  | No  | NA   | 2  | 0  | Low-quality    | Genome-fragment | NA              | 16.5  | 0     |
| S1-final-viral-combined_k141_394456  full  | 8070  | No  | NA   | 0  | 2  | Low-quality    | Genome-fragment | NA              | 10.61 | 0     |
| S8-final-viral-combined_k141_219336  full  | 8075  | No  | NA   | 7  | 0  | Low-quality    | Genome-fragment | NA              | 22.9  | 0     |
| 56_k141_49254                              | 6203  | No  | NA   | 0  | 3  | Not-determined | Genome-fragment | NA              | 0     | 0     |
| 56_k141_31727                              | 1121  | No  | NA   | 0  | 1  | Not-determined | Genome-fragment | NA              | 0     | 0     |
| S7-final-viral-combined_k141_109254  full  | 8078  | No  | NA   | 0  | 4  | Low-quality    | Genome-fragment | NA              | 1.56  | 0     |
| 56_k141_7948                               | 1136  | No  | NA   | 0  | 0  | Not-determined | Genome-fragment | NA              | 0     | 0     |
| S5-final-viral-combined_k141_66610  full   | 8082  | Yes | 5704 | 1  | 1  | Low-quality    | Genome-fragment | NA              | 12.67 | 29.42 |
| 56_k141_132783                             | 8082  | No  | NA   | 0  | 6  | Low-quality    | Genome-fragment | NA              | 4.95  | 0     |
| 56_k141_78164                              | 1118  | No  | NA   | 0  | 1  | Not-determined | Genome-fragment | NA              | 0     | 0     |
| 56_k141_49347                              | 1209  | No  | NA   | 0  | 1  | Not-determined | Genome-fragment | NA              | 0     | 0     |
| 56_k141_61078                              | 1540  | No  | NA   | 0  | 0  | Not-determined | Genome-fragment | NA              | 0     | 0     |
| 56_k141_107908                             | 1115  | No  | NA   | 0  | 0  | Not-determined | Genome-fragment | NA              | 0     | 0     |
| 56_k141_84099                              | 3893  | No  | NA   | 0  | 0  | Not-determined | Genome-fragment | NA              | 0     | 0     |
| 56_k141_90340                              | 1850  | No  | NA   | 0  | 1  | Not-determined | Genome-fragment | NA              | 0     | 0     |
| 56_k141_37497                              | 1148  | No  | NA   | 0  | 2  | Not-determined | Genome-fragment | NA              | 0     | 0     |
| 56_k141_84113                              | 1848  | No  | NA   | 0  | 1  | Not-determined | Genome-fragment | NA              | 0     | 0     |
| S11-final-viral-combined_k141_152609  full | 8085  | No  | NA   | 2  | 0  | Low-quality    | Genome-fragment | NA              | 21.09 | 0     |
| 56_k141_101382                             | 1340  | No  | NA   | 0  | 3  | Not-determined | Genome-fragment | NA              | 0     | 0     |
| S11-final-viral-combined_k141_67873  full  | 8099  | No  | NA   | 0  | 4  | Low-quality    | Genome-fragment | NA              | 15.78 | 0     |
| 56_k141_25441                              | 8300  | No  | NA   | 0  | 5  | Not-determined | Genome-fragment | NA              | 0     | 0     |
| S11-final-viral-combined_k141_381004  full | 8107  | No  | NA   | 9  | 0  | Low-quality    | Genome-fragment | NA              | 17.53 | 0     |
| 56_k141_84162                              | 1627  | No  | NA   | 0  | 1  | Not-determined | Genome-fragment | NA              | 0     | 0     |
| S8_k141_274705                             | 8109  | No  | NA   | 1  | 0  | Low-quality    | Genome-fragment | NA              | 8.71  | 0     |
| S11-final-viral-combined_k141_218830  full | 8110  | No  | NA   | 0  | 2  | Low-quality    | Genome-fragment | NA              | 23.39 | 0     |
| 56_k141_19291                              | 1145  | No  | NA   | 0  | 0  | Not-determined | Genome-fragment | NA              | 0     | 0     |
| 56_k141_19302                              | 2386  | No  | NA   | 0  | 1  | Not-determined | Genome-fragment | NA              | 0     | 0     |
| 56_k141_84211                              | 1820  | No  | NA   | 0  | 1  | Not-determined | Genome-fragment | NA              | 0     | 0     |
| 56_k141_43734                              | 1274  | No  | NA   | 0  | 1  | Not-determined | Genome-fragment | NA              | 0     | 0     |
| 56_k141_25486                              | 3750  | No  | NA   | 0  | 0  | Not-determined | Genome-fragment | NA              | 0     | 0     |
| 56_k141_72584                              | 1215  | No  | NA   | 0  | 1  | Not-determined | Genome-fragment | NA              | 0     | 0     |
| S11-final-viral-combined_k141_58598  full  | 8119  | No  | NA   | 0  | 4  | Low-quality    | Genome-fragment | NA              | 1.27  | 0     |
| S11-final-viral-combined_k141_185767  full | 8121  | No  | NA   | 7  | 0  | Low-quality    | Genome-fragment | NA              | 18.69 | 0     |
| 56_k141_115163                             | 3454  | No  | NA   | 0  | 1  | Not-determined | Genome-fragment | NA              | 0     | 0     |
| 56_k141_67113                              | 1019  | No  | NA   | 0  | 0  | Not-determined | Genome-fragment | NA              | 0     | 0     |
| 56_k141_43795                              | 1003  | No  | NA   | 0  | 1  | Not-determined | Genome-fragment | NA              | 0.17  | 0     |
| S11_k141_34142                             | 8123  | Yes | 406  | 1  | 1  | Low-quality    | Genome-fragment | NA              | 95    | 85    |
| 56_k141_108081                             | 3854  | No  | NA   | 0  | 3  | Not-determined | Genome-fragment | NA              | 0     | 0     |
| 56_k141_14074                              | 4197  | No  | NA   | 0  | 2  | Not-determined | Genome-fragment | NA              | 0     | 0     |
| 56_k141_113624                             | 3461  | No  | NA   | 0  | 1  | Not-determined | Genome-fragment | NA              | 0     | 0     |
| 56_k141_14088                              | 1326  | No  | NA   | 0  | 0  | Not-determined | Genome-fragment | NA              | 0     | 0     |
| 56_k141_78413                              | 1033  | No  | NA   | 0  | 2  | Not-determined | Genome-fragment | NA              | 0     | 0     |
| 56_k141_54534                              | 2356  | No  | NA   | 0  | 1  | Not-determined | Genome-fragment | NA              | 0     | 0     |
| S11_k141_190543                            | 8124  | No  | NA   | 0  | 1  | Low-quality    | Genome-fragment | NA              | 13.07 | 0     |
| 56_k141_61240                              | 1556  | No  | NA   | 0  | 2  | Not-determined | Genome-fragment | NA              | 0     | 0     |
| S9-final-viral-combined_k141_122632  full  | 8126  | No  | NA   | 3  | 1  | Low-quality    | Genome-fragment | NA              | 13.36 | 0     |
| 56_k141_113667                             | 1143  | No  | NA   | 0  | 0  | Not-determined | Genome-fragment | NA              | 0     | 0     |
| 56_k141_119291                             | 1205  | No  | NA   | 0  | 1  | Not-determined | Genome-fragment | NA              | 0     | 0     |
| 56_k141_90589                              | 1182  | No  | NA   | 0  | 1  | Not-determined | Genome-fragment | NA              | 0     | 0     |
| 56_k141_113495                             | 1533  | No  | NA   | 0  | 0  | Not-determined | Genome-fragment | NA              | 0     | 0     |
| 56_k141_54578                              | 34993 | No  | NA   | 11 | 1  | Medium-quality | Genome-fragment | NA              | 77.49 | 0     |
| 56_k141_67285                              | 1099  | No  | NA   | 0  | 0  | Not-determined | Genome-fragment | NA              | 0     | 0     |
| 56_k141_78471                              | 1453  | No  | NA   | 0  | 1  | Not-determined | Genome-fragment | NA              | 0     | 0     |
| 56_k141_67305                              | 1197  | No  | NA   | 0  | 1  | Not-determined | Genome-fragment | NA              | 0     | 0     |
| S11-final-viral-combined_k141_1162  full   | 8132  | No  | NA   | 2  | 1  | Low-quality    | Genome-fragment | NA              | 14.11 | 0     |
| S9-final-viral-combined_k141_114975  full  | 8137  | No  | NA   | 0  | 5  | Low-quality    | Genome-fragment | NA              | 4.14  | 0     |
| 56_k141_101635                             | 1054  | No  | NA   | 0  | 1  | Not-determined | Genome-fragment | NA              | 0     | 0     |
| 56_k141_37901                              | 2570  | No  | NA   | 0  | 1  | Not-determined | Genome-fragment | NA              | 0     | 0     |
| 56_k141_78546                              | 5225  | No  | NA   | 0  | 2  | Not-determined | Genome-fragment | NA              | 0     | 0     |
| 56_k141_72757                              | 3477  | No  | NA   | 0  | 2  | Not-determined | Genome-fragment | NA              | 0     | 0     |
| 56_k141_108231                             | 1029  | No  | NA   | 0  | 1  | Not-determined | Genome-fragment | NA              | 0     | 0     |
| 56_k141_108242                             | 1528  | No  | NA   | 0  | 0  | Not-determined | Genome-fragment | NA              | 0     | 0     |
| 56_k141_25808                              | 1012  | No  | NA   | 0  | 0  | Not-determined | Genome-fragment | NA              | 0     | 0     |
| S8-final-viral-combined_k141_172184  full  | 8140  | No  | NA   | 2  | 0  | Low-quality    | Genome-fragment | NA              | 18.61 | 0     |
| 56_k141_25811                              | 3503  | No  | NA   | 0  | 2  | Not-determined | Genome-fragment | NA              | 0     | 0     |
| 56_k141_14164                              | 4071  | No  | NA   | 0  | 1  | Not-determined | Genome-fragment | NA              | 0     | 0     |
| S9_k141_24662                              | 8142  | No  | NA   | 0  | 1  | Low-quality    | Genome-fragment | NA              | 7.65  | 0     |
| 56_k141_101722                             | 2311  | No  | NA   | 0  | 2  | Not-determined | Genome-fragment | NA              | 0     | 0     |
| 56_k141_67403                              | 1419  | No  | NA   | 0  | 1  | Not-determined | Genome-fragment | NA              | 0     | 0     |
| 56_k141_44053                              | 5061  | No  | NA   | 0  | 2  | Not-determined | Genome-fragment | NA              | 0     | 0     |
| 56_k141_72853                              | 2013  | No  | NA   | 0  | 1  | Not-determined | Genome-fragment | NA              | 0     | 0     |
| 56_k141_137123                             | 4277  | No  | NA   | 0  | 3  | Not-determined | Genome-fragment | NA              | 0     | 0     |
| 56_k141_49821                              | 1296  | No  | NA   | 0  | 0  | Not-determined | Genome-fragment | NA              | 0     | 0     |
| 56_k141_137128                             | 2633  | No  | NA   | 0  | 1  | Not-determined | Genome-fragment | NA              | 0     | 0     |
| 56_k141_3449                               | 3754  | No  | NA   | 0  | 2  | Not-determined | Genome-fragment | NA              | 0     | 0     |
| 56_k141_3452                               | 1635  | No  | NA   | 0  | 1  | Not-determined | Genome-fragment | NA              | 0     | 0     |
| 56_k141_79518                              | 1080  | No  | NA   | 0  | 1  | Not-determined | Genome-fragment | NA              | 0     | 0     |
| 56_k141_14235                              | 3290  | No  | NA   | 0  | 2  | Not-determined | Genome-fragment | NA              | 0     | 0     |
| 56_k141_101748                             | 5408  | No  | NA   | 0  | 1  | Not-determined | Genome-fragment | NA              | 0     | 0     |
| 56_k141_101754                             | 1094  | No  | NA   | 0  | 1  | Not-determined | Genome-fragment | NA              | 0     | 0     |
| S2-final-viral-combined_k141_214609  full  | 8143  | No  | NA   | 0  | 0  | Low-quality    | Genome-fragment | NA              | 9     |       |



|                                             |       |     |    |    |   |                |                 |       |      |
|---------------------------------------------|-------|-----|----|----|---|----------------|-----------------|-------|------|
| 56_k141_126018                              | 4962  | No  | NA | 0  | 5 | Not-determined | Genome-fragment | NA    | 0    |
| 56_k141_119703                              | 1452  | No  | NA | 0  | 2 | Not-determined | Genome-fragment | NA    | 0    |
| 56_k141_32342                               | 1049  | No  | NA | 0  | 1 | Not-determined | Genome-fragment | NA    | 0    |
| 56_k141_126066                              | 1163  | No  | NA | 0  | 1 | Not-determined | Genome-fragment | NA    | 0    |
| 56_k141_8500                                | 6157  | No  | NA | 0  | 2 | Not-determined | Genome-fragment | NA    | 0    |
| 56_k141_97167                               | 3860  | No  | NA | 0  | 7 | Not-determined | Genome-fragment | NA    | 0    |
| 56_k141_3824                                | 15632 | No  | NA | 0  | 7 | Not-determined | Genome-fragment | NA    | 0    |
| 56_k141_61790                               | 1278  | No  | NA | 0  | 1 | Not-determined | Genome-fragment | NA    | 0    |
| 56_k141_97173                               | 5956  | No  | NA | 0  | 6 | Not-determined | Genome-fragment | NA    | 0    |
| S5-final-viral-combined_k141_203702 [full]  | 8184  | No  | NA | 0  | 5 | Low-quality    | Genome-fragment | 14.45 | 0    |
| 56_k141_102173                              | 2753  | No  | NA | 0  | 1 | Not-determined | Genome-fragment | NA    | 0    |
| 56_k141_3856                                | 1149  | No  | NA | 0  | 1 | Not-determined | Genome-fragment | NA    | 0    |
| 56_k141_32443                               | 1279  | No  | NA | 0  | 4 | Not-determined | Genome-fragment | NA    | 0    |
| 56_k141_97201                               | 1150  | No  | NA | 0  | 0 | Not-determined | Genome-fragment | NA    | 0    |
| 56_k141_55197                               | 1878  | No  | NA | 0  | 2 | Not-determined | Genome-fragment | NA    | 0    |
| 56_k141_108668                              | 3513  | No  | NA | 0  | 3 | Not-determined | Genome-fragment | NA    | 0    |
| 56_k141_14577                               | 1294  | No  | NA | 0  | 2 | Not-determined | Genome-fragment | NA    | 0    |
| S17-final-viral-combined_k141_90143 [full]  | 8184  | No  | NA | 10 | 0 | Low-quality    | Genome-fragment | 19.15 | 0    |
| 56_k141_23474                               | 2204  | No  | NA | 0  | 1 | Not-determined | Genome-fragment | NA    | 0    |
| S11-final-viral-combined_k141_171699 [full] | 8185  | No  | NA | 10 | 0 | Low-quality    | Genome-fragment | 18.72 | 0    |
| 56_k141_20040                               | 1515  | No  | NA | 0  | 3 | Not-determined | Genome-fragment | NA    | 0    |
| 56_k141_137561                              | 1056  | No  | NA | 0  | 0 | Not-determined | Genome-fragment | NA    | 0    |
| 56_k141_44501                               | 1579  | No  | NA | 0  | 0 | Not-determined | Genome-fragment | NA    | 0    |
| 56_k141_44515                               | 1715  | No  | NA | 0  | 2 | Not-determined | Genome-fragment | NA    | 0    |
| 56_k141_84586                               | 4099  | No  | NA | 0  | 0 | Not-determined | Genome-fragment | NA    | 0    |
| 56_k141_102078                              | 3845  | No  | NA | 0  | 6 | Not-determined | Genome-fragment | NA    | 0    |
| 56_k141_137591                              | 13884 | No  | NA | 6  | 0 | Complete       | High-quality    | 100   | 0    |
| 56_k141_73419                               | 1152  | No  | NA | 0  | 2 | Not-determined | Genome-fragment | NA    | 0    |
| 56_k141_102031                              | 1611  | No  | NA | 0  | 1 | Not-determined | Genome-fragment | NA    | 0    |
| 56_k141_14653                               | 2527  | No  | NA | 0  | 2 | Not-determined | Genome-fragment | NA    | 0    |
| 56_k141_97349                               | 1562  | No  | NA | 0  | 1 | Not-determined | Genome-fragment | NA    | 0    |
| 56_k141_126157                              | 1011  | No  | NA | 0  | 1 | Not-determined | Genome-fragment | NA    | 0    |
| 56_k141_114391                              | 1071  | No  | NA | 0  | 1 | Not-determined | Genome-fragment | NA    | 0    |
| 56_k141_8603                                | 1023  | No  | NA | 0  | 2 | Not-determined | Genome-fragment | NA    | 0    |
| 56_k141_4064                                | 2012  | No  | NA | 0  | 0 | Not-determined | Genome-fragment | NA    | 0    |
| S12-final-viral-combined_k141_103343 [full] | 8186  | No  | NA | 0  | 1 | Low-quality    | Genome-fragment | 22.34 | 0    |
| 56_k141_68042                               | 1566  | No  | NA | 0  | 2 | Not-determined | Genome-fragment | NA    | 0    |
| 56_k141_14683                               | 2855  | No  | NA | 0  | 1 | Not-determined | Genome-fragment | NA    | 0    |
| 56_k141_102400                              | 2555  | No  | NA | 0  | 1 | Not-determined | Genome-fragment | NA    | 0    |
| 56_k141_14725                               | 1093  | No  | NA | 0  | 0 | Not-determined | Genome-fragment | NA    | 0    |
| 56_k141_14740                               | 1264  | No  | NA | 0  | 1 | Not-determined | Genome-fragment | NA    | 0    |
| 56_k141_4115                                | 1601  | No  | NA | 0  | 0 | Not-determined | Genome-fragment | NA    | 0    |
| 56_k141_79041                               | 4030  | No  | NA | 0  | 2 | Not-determined | Genome-fragment | NA    | 0    |
| 56_k141_108940                              | 1324  | No  | NA | 0  | 3 | Not-determined | Genome-fragment | NA    | 0    |
| 56_k141_120051                              | 1329  | No  | NA | 0  | 1 | Not-determined | Genome-fragment | NA    | 0    |
| 56_k141_120071                              | 1389  | No  | NA | 0  | 0 | Not-determined | Genome-fragment | NA    | 0    |
| 56_k141_62122                               | 3275  | No  | NA | 0  | 1 | Not-determined | Genome-fragment | NA    | 0    |
| 56_k141_20239                               | 1284  | No  | NA | 0  | 1 | Not-determined | Genome-fragment | NA    | 0    |
| 56_k141_220107                              | 2218  | No  | NA | 0  | 2 | Not-determined | Genome-fragment | NA    | 0    |
| S8-final-viral-combined_k141_158208 [full]  | 8187  | No  | NA | 0  | 1 | Low-quality    | Genome-fragment | 12.4  | 0    |
| 56_k141_14800                               | 1790  | No  | NA | 0  | 2 | Not-determined | Genome-fragment | NA    | 0    |
| 56_k141_8641                                | 1102  | No  | NA | 0  | 1 | Not-determined | Genome-fragment | NA    | 0    |
| 56_k141_91133                               | 1387  | No  | NA | 0  | 2 | Not-determined | Genome-fragment | NA    | 0    |
| 56_k141_14818                               | 1321  | No  | NA | 0  | 0 | Not-determined | Genome-fragment | NA    | 0    |
| 56_k141_74066                               | 8188  | No  | NA | 0  | 3 | Low-quality    | Genome-fragment | 14.68 | 0    |
| 56_k141_91168                               | 1234  | No  | NA | 0  | 0 | Not-determined | Genome-fragment | NA    | 0    |
| 56_k141_14874                               | 1123  | No  | NA | 0  | 2 | Not-determined | Genome-fragment | NA    | 0    |
| S5-final-viral-combined_k141_117630 [full]  | 8193  | No  | NA | 1  | 0 | Low-quality    | Genome-fragment | 20.77 | 0    |
| 56_k141_79318                               | 3472  | No  | NA | 0  | 3 | Not-determined | Genome-fragment | NA    | 0    |
| 56_k141_26390                               | 1243  | No  | NA | 0  | 0 | Not-determined | Genome-fragment | NA    | 0    |
| S5-final-viral-combined_k141_28796 [full]   | 8194  | No  | NA | 3  | 0 | Low-quality    | Genome-fragment | 7.85  | 0    |
| 56_k141_8786                                | 1103  | No  | NA | 0  | 1 | Not-determined | Genome-fragment | NA    | 0    |
| 56_k141_4315                                | 3072  | No  | NA | 0  | 4 | Not-determined | Genome-fragment | NA    | 0    |
| 56_k141_8796                                | 16963 | No  | NA | 0  | 6 | Not-determined | Genome-fragment | NA    | 0    |
| 56_k141_38880                               | 1278  | No  | NA | 0  | 1 | Not-determined | Genome-fragment | NA    | 0    |
| 56_k141_91257                               | 1113  | No  | NA | 0  | 0 | Not-determined | Genome-fragment | NA    | 0    |
| 56_k141_8826                                | 1677  | No  | NA | 0  | 1 | Not-determined | Genome-fragment | NA    | 0    |
| 56_k141_55509                               | 5672  | No  | NA | 0  | 0 | Not-determined | Genome-fragment | NA    | 0    |
| 56_k141_126588                              | 4622  | No  | NA | 0  | 0 | Not-determined | Genome-fragment | NA    | 0    |
| 56_k141_137917                              | 9417  | No  | NA | 0  | 8 | Not-determined | Genome-fragment | NA    | 0    |
| 56_k141_137325                              | 3281  | No  | NA | 0  | 1 | Not-determined | Genome-fragment | NA    | 0    |
| 56_k141_73730                               | 4192  | No  | NA | 0  | 1 | Not-determined | Genome-fragment | NA    | 0    |
| 56_k141_102667                              | 1093  | No  | NA | 0  | 1 | Not-determined | Genome-fragment | NA    | 0    |
| S9-final-viral-combined_k141_82096 [full]   | 8195  | No  | NA | 6  | 0 | Low-quality    | Genome-fragment | 18.11 | 0    |
| 56_k141_114737                              | 5312  | No  | NA | 0  | 3 | Not-determined | Genome-fragment | NA    | 0    |
| 56_k141_55564                               | 3844  | No  | NA | 0  | 3 | Not-determined | Genome-fragment | NA    | 0    |
| 56_k141_132443                              | 1388  | No  | NA | 0  | 1 | Not-determined | Genome-fragment | NA    | 0    |
| 56_k141_102704                              | 1890  | No  | NA | 0  | 2 | Not-determined | Genome-fragment | NA    | 0    |
| 56_k141_79336                               | 1412  | No  | NA | 0  | 1 | Not-determined | Genome-fragment | NA    | 0    |
| 56_k141_4462                                | 4312  | No  | NA | 0  | 0 | Not-determined | Genome-fragment | NA    | 0    |
| 56_k141_62450                               | 1634  | No  | NA | 0  | 0 | Not-determined | Genome-fragment | NA    | 0    |
| 56_k141_20412                               | 1250  | No  | NA | 0  | 1 | Not-determined | Genome-fragment | NA    | 0    |
| 56_k141_114773                              | 1904  | No  | NA | 0  | 3 | Not-determined | Genome-fragment | NA    | 0    |
| 56_k141_15029                               | 1285  | No  | NA | 0  | 2 | Not-determined | Genome-fragment | NA    | 0    |
| 56_k141_50538                               | 1071  | No  | NA | 0  | 1 | Not-determined | Genome-fragment | NA    | 0    |
| 56_k141_44901                               | 1147  | No  | NA | 0  | 0 | Not-determined | Genome-fragment | NA    | 0    |
| 56_k141_85481                               | 1375  | No  | NA | 0  | 1 | Not-determined | Genome-fragment | NA    | 0    |
| 56_k141_138029                              | 6087  | No  | NA | 0  | 1 | Not-determined | Genome-fragment | NA    | 0    |
| S12-final-viral-combined_k141_305153 [full] | 8196  | Yes | NA | 1  | 2 | Low-quality    | Genome-fragment | 0.45  | 81.2 |
| S17-final-viral-combined_k141_26333 [full]  | 8200  | No  | NA | 1  | 2 | Low-quality    | Genome-fragment | 6.02  | 0    |
| 56_k141_9037                                | 4620  | No  | NA | 0  | 1 | Not-determined | Genome-fragment | NA    | 0    |
| 56_k141_138082                              | 1129  | No  | NA | 0  | 0 | Not-determined | Genome-fragment | NA    | 0    |
| 56_k141_132588                              | 52822 | No  | NA | 22 | 0 | Medium-quality | Genome-fragment | 87.02 | 0    |
| 56_k141_32935                               | 3073  | No  | NA | 0  | 4 | Not-determined | Genome-fragment | NA    | 0    |
| 56_k141_50662                               | 8017  | No  | NA | 0  | 0 | Not-determined | Genome-fragment | NA    | 0    |
| 56_k141_4602                                | 1133  | No  | NA | 0  | 0 | Not-determined | Genome-fragment | NA    | 0    |
| 56_k141_91543                               | 1533  | No  | NA | 0  | 0 | Not-determined | Genome-fragment | NA    | 0    |
| 56_k141_4625                                | 1241  | No  | NA | 0  | 0 | Not-determined | Genome-fragment | NA    | 0    |
| S11-final-viral-combined_k141_116261 [full] | 8201  | No  | NA | 0  | 1 | Low-quality    | Genome-fragment | 18.13 | 0    |
| 56_k141_85657                               | 1208  | No  | NA | 0  | 3 | Not-determined | Genome-fragment | NA    | 0    |
| 56_k141_85664                               | 1188  | No  | NA | 0  | 0 | Not-determined | Genome-fragment | NA    | 0    |
| 56_k141_120476                              | 3087  | No  | NA | 0  | 1 | Not-determined | Genome-fragment | NA    | 0    |
| 56_k141_9089                                | 1190  | No  | NA | 0  | 0 | Not-determined | Genome-fragment | NA    | 0    |
| 56_k141_138184                              | 1189  | No  | NA | 0  | 1 | Not-determined | Genome-fragment | NA    | 0    |
| 56_k141_9100                                | 4914  | No  | NA | 0  | 3 | Not-determined | Genome-fragment | NA    | 0    |
| S7-final-viral-combined_k141_134467 [full]  | 8203  | No  | NA | 0  | 0 | Low-quality    | Genome-fragment | 19.51 | 0    |
| 56_k141_138214                              | 1258  | No  | NA | 0  | 1 | Not-determined | Genome-fragment | NA    | 0    |
| S2_k141_166892                              | 8203  | No  | NA | 0  | 4 | Low-quality    | Genome-fragment | 9.82  | 0    |
| 56_k141_102965                              | 1982  | No  | NA | 0  | 2 | Not-determined | Genome-fragment | NA    | 0    |
| 56_k141_4720                                | 2646  | No  | NA | 0  | 2 | Not-determined | Genome-fragment | NA    | 0    |
| 56_k141_114967                              | 1040  | No  | NA | 0  | 0 | Not-determined | Genome-fragment | NA    | 0    |
| S11-final-viral-combined_k141_266156 [full] | 8204  | No  | NA | 6  | 0 | Low-quality    | Genome-fragment | 10.93 | 0    |
| 56_k141_4739                                | 3436  | No  | NA | 0  | 1 | Not-determined | Genome-fragment | NA    | 0    |
| 56_k141_26815                               | 3948  | No  | NA | 0  | 2 | Not-determined | Genome-fragment | NA    | 0    |
| 56_k141_85741                               | 1168  | No  | NA | 0  | 2 | Not-determined | Genome-fragment | NA    | 0    |
| 56_k141_62746                               | 1217  | No  | NA | 0  | 0 | Not-determined | Genome-fragment | NA    | 0    |
| 56_k141_109320                              | 2591  | No  | NA | 0  | 2 | Not-determined | Genome-fragment | NA    | 0    |
| 56_k141_20671                               | 1063  | No  | NA | 0  | 1 | Not-determined | Genome-fragment | NA    | 0    |
| 56_k141_88162                               | 1047  | No  | NA | 0  | 0 | Not-determined | Genome-fragment | NA    | 0    |
| S3_k141_128569                              | 8205  | No  | NA | 0  | 0 | Low-quality    | Genome-fragment | 7.78  | 0    |
| 56_k141_15274                               | 3171  | No  | NA | 0  | 1 | Not-determined | Genome-fragment | NA    | 0    |
| 56_k141_91733                               | 2110  | No  | NA | 0  | 0 | Not-determined | Genome-fragment | NA    | 0    |
| S12-final-viral-combined_k141_244553 [full] | 8207  | No  | NA | 0  | 1 | Low-quality    | Genome-fragment | 22.82 | 0    |
| 56_k141_62801                               | 4918  | No  | NA | 0  | 0 | Not-determined | Genome-fragment | NA    | 0    |
| 56_k141_29195                               | 5102  | No  | NA | 0  | 2 | Not-determined | Genome-fragment | NA    | 0    |
| 56_k141_26887                               | 1892  | No  | NA | 0  | 4 | Not-determined | Genome-fragment | NA    | 0    |
| 56_k141_62828                               | 3409  | No  | NA | 0  | 1 | Not-determined | Genome-fragment | NA    | 0    |
| 56_k141_29215                               | 1045  | No  | NA | 0  | 2 | Not-determined | Genome-fragment | NA    | 0    |
| S7-final-viral-combined_k141_216761 [full]  | 8208  | No  | NA | 0  | 6 | Low-quality    | Genome-fragment | 2.26  | 0    |
| 56_k141_68819                               | 1683  | No  | NA | 0  | 1 | Not-determined | Genome-fragment | NA    | 0    |
| 56_k141_109427                              | 1488  | No  | NA | 0  | 1 | Not-determined | Genome-fragment | NA    | 0    |
| 56_k141_138331                              | 1188  | No  | NA | 0  | 0 | Not-determined | Genome-fragment | NA    | 0    |
| 56_k141_138332                              | 1407  | No  | NA | 0  | 1 | Not-determined | Genome-fragment | NA    | 0    |
| 56_k141_4911                                | 1184  | No  | NA | 0  | 2 | Not-determined | Genome-fragment | NA    | 0    |
| 56_k141_9201                                | 2814  | No  | NA | 0  | 2 | Not-determined | Genome-fragment | NA    | 0    |
| 56_k141_120637                              | 2854  | No  | NA | 0  | 2 | Not-determined | Genome-fragment | NA    | 0    |
| 56_k141_9210                                | 5927  | No  | NA | 0  | 7 | Not-determined | Genome-fragment | NA    | 0    |
| 56_k141_62903                               | 1142  | No  | NA | 0  | 2 | Not-determined | Genome-fragment | NA    | 0    |
| 56_k141_50819                               | 1582  | No  | NA | 0  | 2 | Not-determined | Genome-fragment | NA    | 0    |
| S2-final-viral-combined_k141_145788 [full]  | 8211  | No  | NA | 1  | 1 | Low-quality    | Genome-fragment | 10.87 | 0    |
| S1-final-viral-combined_k141_315918 [full]  | 8214  | No  | NA | 3  | 0 | Low-quality    | Genome-fragment | 22.9  | 0    |
| 56_k141_115201                              | 1281  | No  | NA | 0  | 1 | Not-determined | Genome-fragment | NA    | 0    |
| 56_k141_15470                               | 1054  | No  | NA | 0  | 2 | Not-determined | Genome-fragment | NA    | 0    |
| 56_k141_2595                                | 8214  | No  | NA | 0  | 1 | Low-quality    | Genome-fragment | 20.81 | 0    |
| 56_k141_85943                               | 3304  | No  | NA | 0  | 0 | Not-determined | Genome-fragment | NA    | 0    |
| 56_k141_85944                               | 1517  | No  | NA | 0  | 3 | Not-determined | Genome-fragment | NA    | 0    |
| 56_k141_1383                                |       |     |    |    |   |                |                 |       |      |



|                                            |      |     |      |   |   |                |                 |    |       |       |
|--------------------------------------------|------|-----|------|---|---|----------------|-----------------|----|-------|-------|
| 56_k141_98387                              | 1149 | No  | NA   | 0 | 0 | Not-determined | Genome-fragment | NA | 0     | 0     |
| 53-final-viral-combined_k141_389755  full  | 8231 | No  | NA   | 1 | 2 | Low-quality    | Genome-fragment | NA | 9.24  | 0     |
| 56_k141_63265                              | 2322 | No  | NA   | 0 | 1 | Not-determined | Genome-fragment | NA | 0     | 0     |
| 56_k141_63285                              | 3040 | No  | NA   | 0 | 1 | Not-determined | Genome-fragment | NA | 0     | 0     |
| 52-final-viral-combined_k141_74248  full   | 8233 | No  | NA   | 3 | 2 | Low-quality    | Genome-fragment | NA | 19.8  | 0     |
| 58-final-viral-combined_k141_36444  full   | 8234 | No  | NA   | 0 | 6 | Low-quality    | Genome-fragment | NA | 11.27 | 0     |
| 56_k141_51154                              | 2211 | No  | NA   | 0 | 6 | Not-determined | Genome-fragment | NA | 0     | 0     |
| 56_k141_109708                             | 1112 | No  | NA   | 0 | 0 | Not-determined | Genome-fragment | NA | 0     | 0     |
| 56_k141_15779                              | 1059 | No  | NA   | 0 | 0 | Not-determined | Genome-fragment | NA | 0     | 0     |
| 56_k141_63221                              | 2497 | No  | NA   | 0 | 1 | Not-determined | Genome-fragment | NA | 0     | 0     |
| 56_k141_15783                              | 1081 | No  | NA   | 0 | 1 | Not-determined | Genome-fragment | NA | 0     | 0     |
| 56_k141_29849                              | 3058 | No  | NA   | 0 | 2 | Not-determined | Genome-fragment | NA | 0     | 0     |
| 56_k141_74389                              | 1007 | No  | NA   | 0 | 0 | Not-determined | Genome-fragment | NA | 0     | 0     |
| 512-final-viral-combined_k141_158555  full | 8242 | No  | NA   | 0 | 0 | Low-quality    | Genome-fragment | NA | 15.45 | 0     |
| 59-final-viral-combined_k141_110068  full  | 8244 | No  | NA   | 4 | 0 | Low-quality    | Genome-fragment | NA | 13.15 | 0     |
| 56_k141_56151                              | 1185 | No  | NA   | 0 | 1 | Not-determined | Genome-fragment | NA | 0     | 0     |
| 56_k141_27334                              | 7987 | No  | NA   | 0 | 2 | Not-determined | Genome-fragment | NA | 0     | 0     |
| 56_k141_5402                               | 1385 | No  | NA   | 0 | 2 | Not-determined | Genome-fragment | NA | 0     | 0     |
| 56_k141_132885                             | 4408 | No  | NA   | 0 | 1 | Not-determined | Genome-fragment | NA | 0     | 0     |
| 56_k141_103534                             | 5058 | No  | NA   | 0 | 3 | Not-determined | Genome-fragment | NA | 0     | 0     |
| 57_k141_79865                              | 8251 | No  | NA   | 3 | 0 | Low-quality    | Genome-fragment | NA | 17.01 | 0     |
| 517-final-viral-combined_k141_161995  full | 8252 | No  | NA   | 1 | 0 | Low-quality    | Genome-fragment | NA | 19.44 | 0     |
| 58_k141_192222                             | 8254 | No  | NA   | 0 | 4 | Low-quality    | Genome-fragment | NA | 4.27  | 0     |
| 56_k141_27372                              | 2402 | No  | NA   | 0 | 3 | Not-determined | Genome-fragment | NA | 0     | 0     |
| 56_k141_5431                               | 1171 | No  | NA   | 0 | 0 | Not-determined | Genome-fragment | NA | 0     | 0     |
| 56_k141_86321                              | 1362 | No  | NA   | 0 | 2 | Not-determined | Genome-fragment | NA | 0     | 0     |
| 56_k141_63367                              | 1211 | No  | NA   | 0 | 0 | Not-determined | Genome-fragment | NA | 0     | 0     |
| 56_k141_121057                             | 3687 | No  | NA   | 0 | 1 | Not-determined | Genome-fragment | NA | 0     | 0     |
| 512_k141_241604                            | 8267 | No  | NA   | 0 | 1 | Low-quality    | Genome-fragment | NA | 7.42  | 0     |
| 53-final-viral-combined_k141_37545  full   | 8268 | Yes | 4750 | 4 | 2 | Low-quality    | Genome-fragment | NA | 7.87  | 42.55 |
| 56_k141_21084                              | 1021 | No  | NA   | 0 | 0 | Not-determined | Genome-fragment | NA | 0     | 0     |
| 58-final-viral-combined_k141_14311  full   | 8268 | No  | NA   | 5 | 0 | Low-quality    | Genome-fragment | NA | 16.25 | 0     |
| 56_k141_86409                              | 4121 | No  | NA   | 0 | 3 | Not-determined | Genome-fragment | NA | 0     | 0     |
| 517-final-viral-combined_k141_26240  full  | 8270 | No  | NA   | 1 | 0 | Low-quality    | Genome-fragment | NA | 21.4  | 0     |
| 517-final-viral-combined_k141_148074  full | 8271 | No  | NA   | 7 | 0 | Low-quality    | Genome-fragment | NA | 20.34 | 0     |
| 56_k141_63498                              | 1188 | No  | NA   | 0 | 0 | Not-determined | Genome-fragment | NA | 0     | 0     |
| 56_k141_63516                              | 1000 | No  | NA   | 0 | 1 | Not-determined | Genome-fragment | NA | 0     | 0     |
| 56_k141_109585                             | 1848 | No  | NA   | 0 | 2 | Not-determined | Genome-fragment | NA | 0     | 0     |
| 56_k141_63542                              | 1166 | No  | NA   | 0 | 0 | Not-determined | Genome-fragment | NA | 0     | 0     |
| 517-final-viral-combined_k141_226354  full | 8271 | No  | NA   | 4 | 0 | Low-quality    | Genome-fragment | NA | 20.43 | 0     |
| 56_k141_45864                              | 1398 | No  | NA   | 0 | 1 | Not-determined | Genome-fragment | NA | 0     | 0     |
| 56_k141_45877                              | 1261 | No  | NA   | 0 | 1 | Not-determined | Genome-fragment | NA | 0     | 0     |
| 56_k141_110020                             | 1088 | No  | NA   | 0 | 1 | Not-determined | Genome-fragment | NA | 0     | 0     |
| 53_k141_41295                              | 8274 | No  | NA   | 0 | 4 | Low-quality    | Genome-fragment | NA | 0.71  | 0     |
| 57_k141_138826                             | 8281 | No  | NA   | 1 | 4 | Low-quality    | Genome-fragment | NA | 2.2   | 0     |
| 56_k141_98738                              | 1292 | No  | NA   | 0 | 2 | Not-determined | Genome-fragment | NA | 0     | 0     |
| 56_k141_21243                              | 3612 | No  | NA   | 0 | 4 | Not-determined | Genome-fragment | NA | 0     | 0     |
| 58-final-viral-combined_k141_257397  full  | 8282 | No  | NA   | 1 | 0 | Low-quality    | Genome-fragment | NA | 5.01  | 0     |
| 55-final-viral-combined_k141_29462  full   | 8285 | No  | NA   | 6 | 1 | Low-quality    | Genome-fragment | NA | 17.44 | 0     |
| 58_k141_127423                             | 8287 | No  | NA   | 7 | 0 | Low-quality    | Genome-fragment | NA | 24.15 | 0     |
| 56_k141_51542                              | 8157 | No  | NA   | 0 | 2 | Not-determined | Genome-fragment | NA | 0     | 0     |
| 56_k141_16163                              | 4408 | No  | NA   | 0 | 1 | Not-determined | Genome-fragment | NA | 0     | 0     |
| 56_k141_138950                             | 5155 | No  | NA   | 0 | 2 | Not-determined | Genome-fragment | NA | 0     | 0     |
| 56_k141_103710                             | 4787 | No  | NA   | 0 | 5 | Not-determined | Genome-fragment | NA | 0     | 0     |
| 56_k141_80293                              | 2093 | No  | NA   | 0 | 1 | Not-determined | Genome-fragment | NA | 0     | 0     |
| 511_k141_205397                            | 8289 | No  | NA   | 4 | 0 | Low-quality    | Genome-fragment | NA | 37.08 | 0     |
| 56_k141_74772                              | 1517 | No  | NA   | 0 | 3 | Not-determined | Genome-fragment | NA | 0     | 0     |
| 56_k141_21233                              | 5192 | No  | NA   | 0 | 2 | Not-determined | Genome-fragment | NA | 0     | 0     |
| 56_k141_5738                               | 4596 | No  | NA   | 0 | 3 | Not-determined | Genome-fragment | NA | 0     | 0     |
| 56_k141_74785                              | 1088 | No  | NA   | 0 | 1 | Not-determined | Genome-fragment | NA | 0     | 0     |
| 51-final-viral-combined_k141_219989  full  | 8289 | No  | NA   | 1 | 1 | Low-quality    | Genome-fragment | NA | 8.29  | 0     |
| 56_k141_45998                              | 6629 | No  | NA   | 0 | 4 | Not-determined | Genome-fragment | NA | 0     | 0     |
| 56_k141_74809                              | 2362 | No  | NA   | 0 | 0 | Not-determined | Genome-fragment | NA | 0     | 0     |
| 51-final-viral-combined_k141_217110  full  | 8291 | No  | NA   | 1 | 1 | Low-quality    | Genome-fragment | NA | 5.21  | 0     |
| 56_k141_133245                             | 1561 | No  | NA   | 0 | 2 | Not-determined | Genome-fragment | NA | 0     | 0     |
| 56_k141_139010                             | 1387 | No  | NA   | 0 | 1 | Not-determined | Genome-fragment | NA | 0     | 0     |
| 56_k141_46025                              | 1347 | No  | NA   | 0 | 1 | Not-determined | Genome-fragment | NA | 0     | 0     |
| 56_k141_98916                              | 1927 | No  | NA   | 0 | 1 | Not-determined | Genome-fragment | NA | 0     | 0     |
| 56_k141_98925                              | 1213 | No  | NA   | 0 | 1 | Not-determined | Genome-fragment | NA | 0     | 0     |
| 56_k141_40086                              | 4500 | No  | NA   | 0 | 2 | Not-determined | Genome-fragment | NA | 0     | 0     |
| 56_k141_139049                             | 1032 | No  | NA   | 0 | 2 | Not-determined | Genome-fragment | NA | 0     | 0     |
| 51-final-viral-combined_k141_347664  full  | 8294 | No  | NA   | 1 | 2 | Low-quality    | Genome-fragment | NA | 16.75 | 0     |
| 56_k141_133325                             | 1875 | No  | NA   | 0 | 0 | Not-determined | Genome-fragment | NA | 0     | 0     |
| 512-final-viral-combined_k141_245693  full | 8298 | No  | NA   | 0 | 6 | Low-quality    | Genome-fragment | NA | 1.29  | 0     |
| 56_k141_121383                             | 1105 | No  | NA   | 0 | 2 | Not-determined | Genome-fragment | NA | 0     | 0     |
| 56_k141_46155                              | 1874 | No  | NA   | 0 | 1 | Not-determined | Genome-fragment | NA | 0     | 0     |
| 56_k141_121387                             | 4186 | No  | NA   | 0 | 3 | Not-determined | Genome-fragment | NA | 0     | 0     |
| 56_k141_63814                              | 1402 | No  | NA   | 0 | 2 | Not-determined | Genome-fragment | NA | 0     | 0     |
| 56_k141_133373                             | 1125 | No  | NA   | 0 | 1 | Not-determined | Genome-fragment | NA | 0     | 0     |
| 56_k141_127581                             | 3964 | No  | NA   | 0 | 0 | Not-determined | Genome-fragment | NA | 0     | 0     |
| 57_k141_74002                              | 8301 | No  | NA   | 3 | 0 | Low-quality    | Genome-fragment | NA | 17.17 | 0     |
| 56_k141_115984                             | 1463 | No  | NA   | 0 | 1 | Not-determined | Genome-fragment | NA | 0     | 0     |
| 56_k141_27863                              | 7083 | No  | NA   | 0 | 1 | Not-determined | Genome-fragment | NA | 0     | 0     |
| 56_k141_86651                              | 6555 | No  | NA   | 0 | 4 | Not-determined | Genome-fragment | NA | 0     | 0     |
| 56_k141_29037                              | 1509 | No  | NA   | 0 | 0 | Not-determined | Genome-fragment | NA | 0     | 0     |
| 56_k141_9983                               | 2580 | No  | NA   | 0 | 1 | Not-determined | Genome-fragment | NA | 0     | 0     |
| 58-final-viral-combined_k141_44160  full   | 8301 | No  | NA   | 0 | 2 | Low-quality    | Genome-fragment | NA | 4.24  | 0     |
| 56_k141_99074                              | 4692 | No  | NA   | 0 | 3 | Not-determined | Genome-fragment | NA | 0     | 0     |
| 56_k141_86680                              | 3587 | No  | NA   | 0 | 3 | Not-determined | Genome-fragment | NA | 0     | 0     |
| 56_k141_9994                               | 2665 | No  | NA   | 0 | 1 | Not-determined | Genome-fragment | NA | 0     | 0     |
| 52_k141_420                                | 8302 | No  | NA   | 1 | 1 | Low-quality    | Genome-fragment | NA | 11.08 | 0     |
| 56_k141_127685                             | 3316 | No  | NA   | 0 | 0 | Not-determined | Genome-fragment | NA | 0     | 0     |
| 56_k141_139078                             | 5308 | No  | NA   | 0 | 3 | Not-determined | Genome-fragment | NA | 0     | 0     |
| 56_k141_10013                              | 4472 | No  | NA   | 0 | 2 | Not-determined | Genome-fragment | NA | 0     | 0     |
| 56_k141_59532                              | 1319 | No  | NA   | 0 | 2 | Not-determined | Genome-fragment | NA | 0     | 0     |
| 57-final-viral-combined_k141_109212  full  | 8308 | No  | NA   | 0 | 3 | Low-quality    | Genome-fragment | NA | 20.93 | 0     |
| 52-final-viral-combined_k141_171965  full  | 8308 | Yes | 5658 | 1 | 2 | Low-quality    | Genome-fragment | NA | 8.46  | 31.9  |
| 52_k141_164387                             | 8309 | No  | NA   | 0 | 6 | Low-quality    | Genome-fragment | NA | 3.41  | 0     |
| 56_k141_117717                             | 8310 | Yes | 2826 | 1 | 0 | Low-quality    | Genome-fragment | NA | 68.8  | 0     |
| 512-final-viral-combined_k141_170251  full | 8312 | No  | NA   | 0 | 0 | Low-quality    | Genome-fragment | NA | 21.81 | 0     |
| 56_k141_27986                              | 1108 | No  | NA   | 0 | 1 | Not-determined | Genome-fragment | NA | 0     | 0     |
| 56_k141_40283                              | 1418 | No  | NA   | 0 | 1 | Not-determined | Genome-fragment | NA | 0     | 0     |
| 56_k141_92698                              | 1164 | No  | NA   | 0 | 1 | Not-determined | Genome-fragment | NA | 0     | 0     |
| 56_k141_21519                              | 1755 | No  | NA   | 0 | 1 | Not-determined | Genome-fragment | NA | 0     | 0     |
| 512-final-viral-combined_k141_297646  full | 8319 | No  | NA   | 0 | 0 | Low-quality    | Genome-fragment | NA | 7.56  | 0     |
| 59-final-viral-combined_k141_108225  full  | 8321 | Yes | 2412 | 1 | 3 | Low-quality    | Genome-fragment | NA | 1.44  | 71.01 |
| 56_k141_46316                              | 3299 | No  | NA   | 0 | 0 | Not-determined | Genome-fragment | NA | 0     | 0     |
| 56_k141_40344                              | 7668 | No  | NA   | 0 | 3 | Not-determined | Genome-fragment | NA | 0     | 0     |
| 56_k141_116182                             | 4612 | No  | NA   | 0 | 3 | Not-determined | Genome-fragment | NA | 0     | 0     |
| 56_k141_116214                             | 3099 | No  | NA   | 0 | 1 | Not-determined | Genome-fragment | NA | 0     | 0     |
| 56_k141_69731                              | 1010 | No  | NA   | 0 | 2 | Not-determined | Genome-fragment | NA | 0     | 0     |
| 56_k141_138656                             | 3512 | No  | NA   | 0 | 1 | Not-determined | Genome-fragment | NA | 0     | 0     |
| 56_k141_28115                              | 8352 | No  | NA   | 0 | 3 | Not-determined | Genome-fragment | NA | 0     | 0     |
| 52-final-viral-combined_k141_245454  full  | 8321 | No  | NA   | 0 | 4 | Low-quality    | Genome-fragment | NA | 3.5   | 0     |
| 56_k141_64114                              | 1121 | No  | NA   | 0 | 1 | Not-determined | Genome-fragment | NA | 0     | 0     |
| 56_k141_56698                              | 3290 | No  | NA   | 0 | 3 | Not-determined | Genome-fragment | NA | 0     | 0     |
| 56_k141_86911                              | 6083 | No  | NA   | 0 | 3 | Not-determined | Genome-fragment | NA | 0     | 0     |
| 56_k141_40422                              | 1225 | No  | NA   | 0 | 1 | Not-determined | Genome-fragment | NA | 0     | 0     |
| 55-final-viral-combined_k141_167222  full  | 8323 | No  | NA   | 7 | 0 | Low-quality    | Genome-fragment | NA | 19.3  | 0     |
| 57-final-viral-combined_k141_88654  full   | 8332 | No  | NA   | 7 | 0 | Low-quality    | Genome-fragment | NA | 16.48 | 0     |
| 56_k141_23982                              | 3362 | No  | NA   | 0 | 2 | Not-determined | Genome-fragment | NA | 0     | 0     |
| 56_k141_64162                              | 1304 | No  | NA   | 0 | 1 | Not-determined | Genome-fragment | NA | 0     | 0     |
| 56_k141_133653                             | 4319 | No  | NA   | 0 | 3 | Not-determined | Genome-fragment | NA | 0     | 0     |
| 56_k141_21719                              | 1947 | No  | NA   | 0 | 0 | Not-determined | Genome-fragment | NA | 0     | 0     |
| 56_k141_86969                              | 2370 | No  | NA   | 0 | 0 | Not-determined | Genome-fragment | NA | 0     | 0     |
| 56_k141_64183                              | 1005 | No  | NA   | 0 | 1 | Not-determined | Genome-fragment | NA | 0     | 0     |
| 56_k141_40496                              | 3971 | No  | NA   | 0 | 1 | Not-determined | Genome-fragment | NA | 0     | 0     |
| 52_k141_109446                             | 8336 | No  | NA   | 0 | 0 | Low-quality    | Genome-fragment | NA | 22.06 | 0     |
| 56_k141_121606                             | 1118 | No  | NA   | 0 | 0 | Not-determined | Genome-fragment | NA | 0     | 0     |
| 56_k141_133715                             | 1207 | No  | NA   | 0 | 0 | Not-determined | Genome-fragment | NA | 0     | 0     |
| 511-final-viral-combined_k141_278488  full | 8337 | No  | NA   | 1 | 3 | Low-quality    | Genome-fragment | NA | 12.47 | 0     |
| 56_k141_128002                             | 2212 | No  | NA   | 0 | 0 | Not-determined | Genome-fragment | NA | 0     | 0     |
| 56_k141_40572                              | 2225 | No  | NA   | 0 | 3 | Not-determined | Genome-fragment | NA | 0     | 0     |
| 56_k141_110617                             | 4153 | No  | NA   | 0 | 3 | Not-determined | Genome-fragment | NA | 0     | 0     |
| 56_k141_110623                             | 2985 | No  |      |   |   |                |                 |    |       |       |



|                                             |       |     |       |    |    |                |                 |       |       |
|---------------------------------------------|-------|-----|-------|----|----|----------------|-----------------|-------|-------|
| 56_k141_116606                              | 1543  | No  | NA    | 0  | 1  | Not-determined | Genome-fragment | NA    | 0     |
| 56_k141_22040                               | 1091  | No  | NA    | 0  | 2  | Not-determined | Genome-fragment | NA    | 0     |
| 56_k141_99600                               | 1367  | No  | NA    | 0  | 0  | Not-determined | Genome-fragment | NA    | 0     |
| 56_k141_110889                              | 3507  | No  | NA    | 0  | 2  | Not-determined | Genome-fragment | NA    | 0     |
| 56_k141_128284                              | 6173  | No  | NA    | 0  | 5  | Not-determined | Genome-fragment | NA    | 0     |
| 52-final-viral-combined_k141_187089}[full]  | 8376  | No  | NA    | 0  | 1  | Low-quality    | Genome-fragment | 18.53 | 0     |
| 56_k141_64524                               | 1431  | No  | NA    | 0  | 0  | Not-determined | Genome-fragment | NA    | 0     |
| 56_k141_139363                              | 1489  | No  | NA    | 0  | 1  | Not-determined | Genome-fragment | NA    | 0     |
| 56_k141_40851                               | 1593  | No  | NA    | 0  | 3  | Not-determined | Genome-fragment | NA    | 0     |
| 56_k141_41320                               | 8376  | No  | NA    | 1  | 0  | Low-quality    | Genome-fragment | 8.85  | 0     |
| 56_k141_80991                               | 2006  | No  | NA    | 0  | 0  | Not-determined | Genome-fragment | NA    | 0     |
| 56_k141_116555                              | 7740  | No  | NA    | 0  | 1  | Not-determined | Genome-fragment | NA    | 0     |
| 51-final-viral-combined_k141_298996}[full]  | 8378  | No  | NA    | 0  | 4  | Low-quality    | Genome-fragment | 12.76 | 0     |
| 512-final-viral-combined_k141_192293}[full] | 8386  | No  | NA    | 1  | 1  | Low-quality    | Genome-fragment | 26.11 | 0     |
| 512-final-viral-combined_k141_39486}[full]  | 8395  | No  | NA    | 1  | 2  | Low-quality    | Genome-fragment | 7.52  | 0     |
| 56_k141_139701                              | 1004  | No  | NA    | 0  | 0  | Not-determined | Genome-fragment | NA    | 0     |
| 56_k141_104319                              | 1410  | No  | NA    | 0  | 1  | Not-determined | Genome-fragment | NA    | 0     |
| 56-final-viral-combined_k141_76640}[full]   | 8396  | No  | NA    | 0  | 2  | Low-quality    | Genome-fragment | 7.31  | 0     |
| 56_k141_70218                               | 1521  | No  | NA    | 0  | 0  | Not-determined | Genome-fragment | NA    | 0     |
| 56_k141_17063                               | 3708  | No  | NA    | 0  | 2  | Not-determined | Genome-fragment | NA    | 0     |
| 56_k141_99674                               | 1231  | No  | NA    | 0  | 0  | Not-determined | Genome-fragment | NA    | 0     |
| 58-final-viral-combined_k141_81782}[full]   | 8399  | No  | NA    | 0  | 6  | Low-quality    | Genome-fragment | 3.79  | 0     |
| 56_k141_52383                               | 3022  | No  | NA    | 0  | 2  | Not-determined | Genome-fragment | NA    | 0     |
| 56_k141_116746                              | 1051  | No  | NA    | 0  | 0  | Not-determined | Genome-fragment | NA    | 0     |
| 56_k141_46759                               | 3267  | No  | NA    | 0  | 4  | Not-determined | Genome-fragment | NA    | 0     |
| 56_k141_93172                               | 3474  | No  | NA    | 0  | 2  | Not-determined | Genome-fragment | NA    | 0     |
| 52-final-viral-combined_k141_241558}[full]  | 8400  | No  | NA    | 0  | 2  | Low-quality    | Genome-fragment | 13.62 | 0     |
| 56_k141_87434                               | 2713  | No  | NA    | 0  | 2  | Not-determined | Genome-fragment | NA    | 0     |
| 53-final-viral-combined_k141_27154}[full]   | 8403  | No  | NA    | 3  | 1  | Low-quality    | Genome-fragment | 20.17 | 0     |
| 56_k141_22212                               | 1058  | No  | NA    | 0  | 1  | Not-determined | Genome-fragment | NA    | 0     |
| 52-final-viral-combined_k141_81697}[full]   | 8403  | No  | NA    | 6  | 0  | Low-quality    | Genome-fragment | 22.42 | 0     |
| 58-final-viral-combined_k141_244096}[full]  | 8408  | No  | NA    | 0  | 4  | Low-quality    | Genome-fragment | 17.73 | 0     |
| 56_k141_10666                               | 3812  | No  | NA    | 0  | 2  | Not-determined | Genome-fragment | NA    | 0     |
| 56_k141_104423                              | 1114  | No  | NA    | 0  | 0  | Not-determined | Genome-fragment | NA    | 0     |
| 56_k141_22237                               | 1180  | No  | NA    | 0  | 1  | Not-determined | Genome-fragment | NA    | 0     |
| 56_k141_10678                               | 1792  | No  | NA    | 0  | 1  | Not-determined | Genome-fragment | NA    | 0     |
| 57-final-viral-combined_k141_230524}[full]  | 8413  | No  | NA    | 3  | 0  | Low-quality    | Genome-fragment | 17.21 | 0     |
| 56_k141_87460                               | 3621  | No  | NA    | 0  | 1  | Not-determined | Genome-fragment | NA    | 0     |
| 57-final-viral-combined_k141_73251}[full]   | 8414  | No  | NA    | 0  | 1  | Low-quality    | Genome-fragment | 12.75 | 0     |
| 56_k141_139848                              | 1154  | No  | NA    | 0  | 1  | Not-determined | Genome-fragment | NA    | 0     |
| 51_k141_84760                               | 8422  | No  | NA    | 0  | 5  | Low-quality    | Genome-fragment | 4.76  | 0     |
| 56_k141_52523                               | 4752  | No  | NA    | 0  | 2  | Not-determined | Genome-fragment | NA    | 0     |
| 52_k141_87476                               | 8425  | No  | NA    | 0  | 3  | Low-quality    | Genome-fragment | 5.15  | 0     |
| 56_k141_122031                              | 1559  | No  | NA    | 0  | 0  | Not-determined | Genome-fragment | NA    | 0     |
| 56_k141_104475                              | 2904  | No  | NA    | 0  | 4  | Not-determined | Genome-fragment | NA    | 0     |
| 517-final-viral-combined_k141_67475}[full]  | 8426  | No  | NA    | 0  | 1  | Low-quality    | Genome-fragment | 6.32  | 0     |
| 56_k141_52561                               | 1180  | No  | NA    | 0  | 1  | Not-determined | Genome-fragment | NA    | 0     |
| 56_k141_111007                              | 3111  | No  | NA    | 0  | 3  | Not-determined | Genome-fragment | NA    | 0     |
| 56_k141_57305                               | 2160  | No  | NA    | 0  | 1  | Not-determined | Genome-fragment | NA    | 0     |
| 56_k141_34465                               | 1301  | No  | NA    | 0  | 1  | Not-determined | Genome-fragment | NA    | 0     |
| 56_k141_57317                               | 1584  | No  | NA    | 0  | 1  | Not-determined | Genome-fragment | NA    | 0     |
| 58-final-viral-combined_k141_232141}[full]  | 8427  | Yes | 2484  | 2  | 2  | Low-quality    | Genome-fragment | 4.57  | 70.52 |
| 56_k141_81205                               | 1117  | No  | NA    | 0  | 0  | Not-determined | Genome-fragment | NA    | 0     |
| 517-final-viral-combined_k141_56937}[full]  | 8431  | No  | NA    | 1  | 0  | Low-quality    | Genome-fragment | 2.31  | 0     |
| 517-final-viral-combined_k141_76219}[full]  | 8434  | No  | NA    | 6  | 0  | Low-quality    | Genome-fragment | 24.4  | 0     |
| 56_k141_78644                               | 3672  | No  | NA    | 0  | 1  | Not-determined | Genome-fragment | NA    | 0     |
| 56_k141_10772                               | 2914  | No  | NA    | 0  | 2  | Not-determined | Genome-fragment | NA    | 0     |
| 56_k141_41039                               | 12158 | No  | NA    | 0  | 11 | Not-determined | Genome-fragment | NA    | 0     |
| 56_k141_116938                              | 3524  | No  | NA    | 0  | 8  | Not-determined | Genome-fragment | NA    | 0     |
| 517-final-viral-combined_k141_142770}[full] | 8436  | No  | NA    | 8  | 1  | Low-quality    | Genome-fragment | 18.77 | 0     |
| 56_k141_81300                               | 1581  | No  | NA    | 0  | 1  | Not-determined | Genome-fragment | NA    | 0     |
| 57_k141_240950                              | 8437  | No  | NA    | 0  | 0  | Low-quality    | Genome-fragment | 14.09 | 0     |
| 56_k141_140004                              | 1396  | No  | NA    | 0  | 1  | Not-determined | Genome-fragment | NA    | 0     |
| 512-final-viral-combined_k141_12710}[full]  | 8439  | No  | NA    | 3  | 1  | Low-quality    | Genome-fragment | 9.47  | 0     |
| 56_k141_93468                               | 7054  | No  | NA    | 0  | 5  | Not-determined | Genome-fragment | NA    | 0     |
| 51-final-viral-combined_k141_79383}[full]   | 8442  | Yes | 5450  | 1  | 3  | Low-quality    | Genome-fragment | 4.05  | 35.44 |
| 56_k141_128716                              | 1714  | No  | NA    | 0  | 0  | Not-determined | Genome-fragment | NA    | 0     |
| 55-final-viral-combined_k141_115085}[full]  | 8450  | Yes | 740   | 1  | 5  | Low-quality    | Genome-fragment | 17.78 | 91.24 |
| 512-final-viral-combined_k141_153394}[full] | 8457  | No  | NA    | 1  | 0  | Low-quality    | Genome-fragment | 7.71  | 0     |
| 56_k141_104713                              | 1173  | No  | NA    | 0  | 1  | Not-determined | Genome-fragment | NA    | 0     |
| 56_k141_52786                               | 1587  | No  | NA    | 0  | 1  | Not-determined | Genome-fragment | NA    | 0     |
| 56_k141_10893                               | 1167  | No  | NA    | 0  | 0  | Not-determined | Genome-fragment | NA    | 0     |
| 56_k141_22475                               | 3859  | No  | NA    | 0  | 4  | Not-determined | Genome-fragment | NA    | 0     |
| 512_k141_13942                              | 8465  | Yes | 2190  | 4  | 2  | Low-quality    | Genome-fragment | 3.39  | 74.13 |
| 56_k141_111261                              | 1501  | No  | NA    | 0  | 1  | Not-determined | Genome-fragment | NA    | 0     |
| 56_k141_10954                               | 4833  | No  | NA    | 0  | 4  | Not-determined | Genome-fragment | NA    | 0     |
| 56_k141_22507                               | 1049  | No  | NA    | 0  | 1  | Not-determined | Genome-fragment | NA    | 0     |
| 56_k141_134470                              | 1075  | No  | NA    | 0  | 1  | Not-determined | Genome-fragment | NA    | 0     |
| 56_k141_75806                               | 1955  | No  | NA    | 0  | 0  | Not-determined | Genome-fragment | NA    | 0     |
| 59_k141_76730                               | 8467  | No  | NA    | 8  | 0  | Low-quality    | Genome-fragment | 21    | 0     |
| 57-final-viral-combined_k141_75194}[full]   | 8467  | No  | NA    | 3  | 1  | Low-quality    | Genome-fragment | 11.75 | 0     |
| 56_k141_104865                              | 1176  | No  | NA    | 0  | 0  | Not-determined | Genome-fragment | NA    | 0     |
| 54-final-viral-combined_k141_67837}[full]   | 8467  | Yes | 4867  | 1  | 1  | Low-quality    | Genome-fragment | 11.39 | 42.52 |
| 56_k141_81534                               | 1123  | No  | NA    | 0  | 1  | Not-determined | Genome-fragment | NA    | 0     |
| 51-final-viral-combined_k141_255309}[full]  | 8468  | No  | NA    | 0  | 1  | Low-quality    | Genome-fragment | 12.97 | 0     |
| 56_k141_75863                               | 3011  | No  | NA    | 0  | 1  | Not-determined | Genome-fragment | NA    | 0     |
| 51-final-viral-combined_k141_126852}[full]  | 8471  | No  | NA    | 2  | 0  | Low-quality    | Genome-fragment | 24.17 | 0     |
| 56_k141_104921                              | 1188  | No  | NA    | 0  | 1  | Not-determined | Genome-fragment | NA    | 0     |
| 56_k141_104924                              | 1262  | No  | NA    | 0  | 1  | Not-determined | Genome-fragment | NA    | 0     |
| 56_k141_134594                              | 1560  | No  | NA    | 0  | 1  | Not-determined | Genome-fragment | NA    | 0     |
| 56_k141_117197                              | 3531  | No  | NA    | 0  | 5  | Not-determined | Genome-fragment | NA    | 0     |
| 56_k141_122436                              | 3965  | No  | NA    | 0  | 1  | Not-determined | Genome-fragment | NA    | 0     |
| 56_k141_128897                              | 1010  | No  | NA    | 0  | 0  | Not-determined | Genome-fragment | NA    | 0     |
| 55-final-viral-combined_k141_114605}[full]  | 8476  | No  | NA    | 0  | 5  | Low-quality    | Genome-fragment | 2.18  | 0     |
| 56_k141_111384                              | 1336  | No  | NA    | 0  | 1  | Not-determined | Genome-fragment | NA    | 0     |
| 56_k141_34714                               | 1141  | No  | NA    | 0  | 1  | Not-determined | Genome-fragment | NA    | 0     |
| 56_k141_122474                              | 3257  | No  | NA    | 0  | 3  | Not-determined | Genome-fragment | NA    | 0     |
| 56_k141_87893                               | 1418  | No  | NA    | 0  | 1  | Not-determined | Genome-fragment | NA    | 0     |
| 51_k141_140344                              | 8482  | No  | NA    | 0  | 1  | Low-quality    | Genome-fragment | 9.82  | 0     |
| 56_k141_93761                               | 5924  | No  | NA    | 0  | 2  | Not-determined | Genome-fragment | NA    | 0     |
| 56_k141_87914                               | 5579  | No  | NA    | 0  | 3  | Not-determined | Genome-fragment | NA    | 0     |
| 512-final-viral-combined_k141_326327}[full] | 8483  | No  | NA    | 0  | 1  | Low-quality    | Genome-fragment | 9.04  | 0     |
| 56_k141_87947                               | 2436  | No  | NA    | 0  | 2  | Not-determined | Genome-fragment | NA    | 0     |
| 56_k141_129032                              | 3971  | No  | NA    | 0  | 4  | Not-determined | Genome-fragment | NA    | 0     |
| 56_k141_104996                              | 1034  | No  | NA    | 0  | 2  | Not-determined | Genome-fragment | NA    | 0     |
| 56_k141_11119                               | 1087  | No  | NA    | 0  | 1  | Not-determined | Genome-fragment | NA    | 0     |
| 56_k141_140389                              | 1431  | No  | NA    | 0  | 2  | Not-determined | Genome-fragment | NA    | 0     |
| 56_k141_75966                               | 4890  | No  | NA    | 0  | 2  | Not-determined | Genome-fragment | NA    | 0     |
| 58-final-viral-combined_k141_132807}[full]  | 8486  | No  | NA    | 9  | 0  | Low-quality    | Genome-fragment | 21.84 | 0     |
| 56_k141_34923                               | 1960  | No  | NA    | 0  | 1  | Not-determined | Genome-fragment | NA    | 0     |
| 56_k141_105093                              | 5421  | No  | NA    | 0  | 1  | Not-determined | Genome-fragment | NA    | 0     |
| 56_k141_140496                              | 1503  | No  | NA    | 0  | 1  | Not-determined | Genome-fragment | NA    | 0     |
| 56_k141_57861                               | 4647  | No  | NA    | 0  | 0  | Not-determined | Genome-fragment | NA    | 0     |
| 52_k141_46484                               | 8488  | No  | NA    | 1  | 1  | Low-quality    | Genome-fragment | 12.84 | 0     |
| 54-final-viral-combined_k141_29007}[full]   | 8492  | Yes | 5426  | 2  | 2  | Low-quality    | Genome-fragment | 6.59  | 36.1  |
| 56_k141_105110                              | 1179  | No  | NA    | 0  | 3  | Not-determined | Genome-fragment | NA    | 0     |
| 56_k141_76091                               | 4415  | No  | NA    | 0  | 2  | Not-determined | Genome-fragment | NA    | 0     |
| 517-final-viral-combined_k141_17066}[full]  | 8493  | No  | NA    | 0  | 0  | Low-quality    | Genome-fragment | 28.2  | 0     |
| 51_k141_192699                              | 8494  | No  | NA    | 0  | 6  | Low-quality    | Genome-fragment | 2.49  | 0     |
| 56_k141_134898                              | 1534  | No  | NA    | 0  | 1  | Not-determined | Genome-fragment | NA    | 0     |
| 55-final-viral-combined_k141_109632}[full]  | 8496  | No  | NA    | 8  | 0  | Low-quality    | Genome-fragment | 21.61 | 0     |
| 56_k141_29319                               | 1045  | No  | NA    | 0  | 0  | Not-determined | Genome-fragment | NA    | 0     |
| 56_k141_134925                              | 1603  | No  | NA    | 0  | 1  | Not-determined | Genome-fragment | NA    | 0     |
| 56_k141_35109                               | 2217  | No  | NA    | 0  | 2  | Not-determined | Genome-fragment | NA    | 0     |
| 56_k141_35127                               | 5924  | No  | NA    | 0  | 3  | Not-determined | Genome-fragment | NA    | 0     |
| 56_k141_122981                              | 1386  | No  | NA    | 0  | 2  | Not-determined | Genome-fragment | NA    | 0     |
| 56_k141_81987                               | 1153  | No  | NA    | 0  | 0  | Not-determined | Genome-fragment | NA    | 0     |
| 56_k141_35148                               | 1119  | No  | NA    | 0  | 1  | Not-determined | Genome-fragment | NA    | 0     |
| 56_k141_35158                               | 3768  | No  | NA    | 0  | 4  | Not-determined | Genome-fragment | NA    | 0     |
| 56_k141_23240                               | 5060  | No  | NA    | 0  | 1  | Not-determined | Genome-fragment | NA    | 0     |
| 56_k141_11421                               | 1642  | No  | NA    | 0  | 1  | Not-determined | Genome-fragment | NA    | 0     |
| 56_k141_135024                              | 1563  | No  | NA    | 2  | 1  | Not-determined | Genome-fragment | NA    | 0     |
| 56_k141_58068                               | 4236  | No  | NA    | 0  | 0  | Not-determined | Genome-fragment | NA    | 0     |
| 56_k141_123071                              | 1026  | No  | NA    | 0  | 1  | Not-determined | Genome-fragment | NA    | 0     |
| 56_k141_76257                               | 4603  | No  | NA    | 1  | 1  | Not-determined | Genome-fragment | NA    | 0     |
| 512-final-viral-combined_k141_268888}[full] | 8504  | No  | NA    | 6  | 0  | Low-quality    | Genome-fragment | 20.44 | 0     |
| 56_k141_23407                               | 3637  | No  | NA    | 0  | 1  | Not-determined | Genome-fragment | NA    | 0     |
| 56_k141_140743                              | 65184 | No  | NA    | 14 | 0  | Complete       | High-quality    | 100   | 0     |
| 58-final-viral-combined_k141_246389}[full]  | 41205 | No  | NA    | 17 | 0  | High-quality   | High-quality    | 100   | 0     |
| 58-final-viral-combined_k141_86965}[full]   | 4784  | No  | NA    | 0  | 2  | Not-determined | Genome-fragment | NA    | 0     |
| 57-final-viral-combined_k141_132132}[full]  | 8513  | No  | NA    | 2  | 0  | Low-quality    | Genome-fragment | 9.61  | 0     |
| 58-final-viral-combined_k141_215102}[full]  | 86504 | Yes | 37446 | 15 | 16 | High-quality   | High-quality    | 100   | 43.69 |
| 58-final-viral-combined_k141_192515}[full]  | 12161 | No  |       |    |    |                |                 |       |       |



|                                      |        |      |     |      |   |   |                |                 |    |       |       |
|--------------------------------------|--------|------|-----|------|---|---|----------------|-----------------|----|-------|-------|
| S8-final-viral-combined_k141_218941  | [full] | 3417 | No  | NA   | 0 | 0 | Not-determined | Genome-fragment | NA | 0     | 0     |
| S8-final-viral-combined_k141_207414  | [full] | 1400 | No  | NA   | 0 | 1 | Not-determined | Genome-fragment | NA | 0     | 0     |
| S17-final-viral-combined_k141_92287  | [full] | 8565 | No  | NA   | 0 | 8 | Low-quality    | Genome-fragment | NA | 18.82 | 0     |
| S8-final-viral-combined_k141_113     | [full] | 1441 | No  | NA   | 0 | 1 | Not-determined | Genome-fragment | NA | 0     | 0     |
| S8-final-viral-combined_k141_149844  | [full] | 1116 | No  | NA   | 0 | 0 | Not-determined | Genome-fragment | NA | 0     | 0     |
| S1-final-viral-combined_k141_231600  | [full] | 8566 | No  | NA   | 7 | 0 | Low-quality    | Genome-fragment | NA | 14.07 | 0     |
| S8-final-viral-combined_k141_218953  | [full] | 9236 | No  | NA   | 0 | 5 | Not-determined | Genome-fragment | NA | 0     | 0     |
| S1-final-viral-combined_k141_88045   | [full] | 8569 | No  | NA   | 1 | 2 | Low-quality    | Genome-fragment | NA | 5.76  | 0     |
| S11-final-viral-combined_k141_232874 | [full] | 8574 | No  | NA   | 0 | 6 | Low-quality    | Genome-fragment | NA | 3.71  | 0     |
| S8-final-viral-combined_k141_23119   | [full] | 3137 | No  | NA   | 0 | 0 | Not-determined | Genome-fragment | NA | 0     | 0     |
| S12-final-viral-combined_k141_320793 | [full] | 8574 | No  | NA   | 0 | 6 | Low-quality    | Genome-fragment | NA | 2.83  | 0     |
| S8-final-viral-combined_k141_135     | [full] | 4046 | No  | NA   | 0 | 1 | Not-determined | Genome-fragment | NA | 0     | 0     |
| S8-final-viral-combined_k141_211140  | [full] | 8582 | No  | NA   | 0 | 5 | Low-quality    | Genome-fragment | NA | 5.3   | 0     |
| S8-final-viral-combined_k141_184415  | [full] | 5150 | No  | NA   | 0 | 3 | Not-determined | Genome-fragment | NA | 0     | 0     |
| S8-final-viral-combined_k141_172899  | [full] | 1342 | No  | NA   | 0 | 1 | Not-determined | Genome-fragment | NA | 0     | 0     |
| S8-final-viral-combined_k141_242079  | [full] | 1424 | No  | NA   | 0 | 0 | Not-determined | Genome-fragment | NA | 0     | 0     |
| S1-final-viral-combined_k141_255336  | [full] | 8585 | No  | NA   | 0 | 4 | Low-quality    | Genome-fragment | NA | 5.54  | 0     |
| S6-final-viral-combined_k141_3614    | [full] | 8589 | No  | NA   | 0 | 1 | Low-quality    | Genome-fragment | NA | 8.47  | 0     |
| S11-final-viral-combined_k141_168518 | [full] | 8592 | No  | NA   | 0 | 0 | Low-quality    | Genome-fragment | NA | 10.23 | 0     |
| S8-final-viral-combined_k141_172941  | [full] | 2722 | No  | NA   | 0 | 2 | Not-determined | Genome-fragment | NA | 0     | 0     |
| S8-final-viral-combined_k141_23224   | [full] | 3646 | No  | NA   | 0 | 0 | Not-determined | Genome-fragment | NA | 0     | 0     |
| S8-final-viral-combined_k141_230561  | [full] | 8515 | No  | NA   | 0 | 3 | Not-determined | Genome-fragment | NA | 0     | 0     |
| S17-final-viral-combined_k141_17313  | [full] | 8596 | No  | NA   | 0 | 4 | Low-quality    | Genome-fragment | NA | 4.14  | 0     |
| S8-final-viral-combined_k141_138485  | [full] | 4038 | No  | NA   | 0 | 2 | Not-determined | Genome-fragment | NA | 0     | 0     |
| S8-final-viral-combined_k141_11578   | [full] | 2075 | No  | NA   | 0 | 1 | Not-determined | Genome-fragment | NA | 0     | 0     |
| S8_k141_111834                       | [full] | 8597 | No  | NA   | 4 | 0 | Low-quality    | Genome-fragment | NA | 14.29 | 0     |
| S2-final-viral-combined_k141_45082   | [full] | 8598 | Yes | 4485 | 3 | 3 | Low-quality    | Genome-fragment | NA | 2.64  | 47.84 |
| S2_k141_87857                        | [full] | 8598 | No  | NA   | 3 | 0 | Low-quality    | Genome-fragment | NA | 22.16 | 0     |
| S8-final-viral-combined_k141_230695  | [full] | 2123 | No  | NA   | 0 | 2 | Not-determined | Genome-fragment | NA | 0     | 0     |
| S7-final-viral-combined_k141_1081    | [full] | 8602 | No  | NA   | 0 | 3 | Low-quality    | Genome-fragment | NA | 8.25  | 0     |
| S8-final-viral-combined_k141_138520  | [full] | 1777 | No  | NA   | 0 | 1 | Not-determined | Genome-fragment | NA | 0     | 0     |
| S8-final-viral-combined_k141_80959   | [full] | 1789 | No  | NA   | 0 | 2 | Not-determined | Genome-fragment | NA | 0     | 0     |
| S8-final-viral-combined_k141_253554  | [full] | 2223 | No  | NA   | 0 | 2 | Not-determined | Genome-fragment | NA | 0     | 0     |
| S17-final-viral-combined_k141_25588  | [full] | 8604 | No  | NA   | 0 | 3 | Low-quality    | Genome-fragment | NA | 9.88  | 0     |
| S8-final-viral-combined_k141_23271   | [full] | 3597 | No  | NA   | 0 | 3 | Not-determined | Genome-fragment | NA | 0     | 0     |
| S8-final-viral-combined_k141_2131    | [full] | 2382 | No  | NA   | 0 | 2 | Not-determined | Genome-fragment | NA | 0     | 0     |
| S1-final-viral-combined_k141_186887  | [full] | 8605 | No  | NA   | 2 | 0 | Low-quality    | Genome-fragment | NA | 15.47 | 0     |
| S8-final-viral-combined_k141_236214  | [full] | 4236 | No  | NA   | 0 | 4 | Not-determined | Genome-fragment | NA | 0     | 0     |
| S8-final-viral-combined_k141_196051  | [full] | 2560 | No  | NA   | 0 | 1 | Not-determined | Genome-fragment | NA | 0     | 0     |
| S8-final-viral-combined_k141_243281  | [full] | 8610 | No  | NA   | 0 | 6 | Low-quality    | Genome-fragment | NA | 7.26  | 0     |
| S2-final-viral-combined_k141_37218   | [full] | 8614 | No  | NA   | 0 | 1 | Low-quality    | Genome-fragment | NA | 8.77  | 0     |
| S2_k141_88873                        | [full] | 8617 | No  | NA   | 4 | 0 | Low-quality    | Genome-fragment | NA | 21.88 | 0     |
| S8-final-viral-combined_k141_80959   | [full] | 1645 | No  | NA   | 0 | 2 | Not-determined | Genome-fragment | NA | 0     | 0     |
| S8-final-viral-combined_k141_23302   | [full] | 2503 | No  | NA   | 0 | 1 | Not-determined | Genome-fragment | NA | 0     | 0     |
| S8-final-viral-combined_k141_230731  | [full] | 3325 | No  | NA   | 0 | 1 | Not-determined | Genome-fragment | NA | 0     | 0     |
| S8-final-viral-combined_k141_2571    | [full] | 4120 | No  | NA   | 0 | 1 | Not-determined | Genome-fragment | NA | 0     | 0     |
| S8-final-viral-combined_k141_242171  | [full] | 2362 | No  | NA   | 0 | 2 | Not-determined | Genome-fragment | NA | 0     | 0     |
| S11-final-viral-combined_k141_210871 | [full] | 8619 | No  | NA   | 5 | 0 | Low-quality    | Genome-fragment | NA | 17.94 | 0     |
| S8-final-viral-combined_k141_103785  | [full] | 2319 | No  | NA   | 0 | 2 | Not-determined | Genome-fragment | NA | 0     | 0     |
| S8-final-viral-combined_k141_175818  | [full] | 2553 | No  | NA   | 0 | 2 | Not-determined | Genome-fragment | NA | 0     | 0     |
| S8-final-viral-combined_k141_207589  | [full] | 1662 | No  | NA   | 0 | 0 | Not-determined | Genome-fragment | NA | 0     | 0     |
| S8-final-viral-combined_k141_103788  | [full] | 3607 | No  | NA   | 0 | 0 | Not-determined | Genome-fragment | NA | 0     | 0     |
| S8-final-viral-combined_k141_161357  | [full] | 2906 | No  | NA   | 0 | 2 | Not-determined | Genome-fragment | NA | 0     | 0     |
| S2-final-viral-combined_k141_229077  | [full] | 8619 | No  | NA   | 0 | 5 | Low-quality    | Genome-fragment | NA | 5.47  | 0     |
| S8-final-viral-combined_k141_196078  | [full] | 2027 | No  | NA   | 0 | 2 | Not-determined | Genome-fragment | NA | 0     | 0     |
| S8-final-viral-combined_k141_11660   | [full] | 8170 | No  | NA   | 0 | 6 | Not-determined | Genome-fragment | NA | 0     | 0     |
| S8-final-viral-combined_k141_184559  | [full] | 1120 | No  | NA   | 0 | 0 | Not-determined | Genome-fragment | NA | 0     | 0     |
| S8-final-viral-combined_k141_11667   | [full] | 7172 | No  | NA   | 0 | 7 | Not-determined | Genome-fragment | NA | 0     | 0     |
| S12-final-viral-combined_k141_195561 | [full] | 8623 | Yes | 5739 | 2 | 1 | Low-quality    | Genome-fragment | NA | 10.42 | 32.45 |
| S17-final-viral-combined_k141_215362 | [full] | 8627 | No  | NA   | 3 | 1 | Low-quality    | Genome-fragment | NA | 24.3  | 0     |
| S8-final-viral-combined_k141_208023  | [full] | 1439 | No  | NA   | 0 | 2 | Not-determined | Genome-fragment | NA | 0     | 0     |
| S8-final-viral-combined_k141_46382   | [full] | 6415 | No  | NA   | 0 | 2 | Not-determined | Genome-fragment | NA | 0     | 0     |
| S8-final-viral-combined_k141_230837  | [full] | 1117 | No  | NA   | 0 | 1 | Not-determined | Genome-fragment | NA | 0     | 0     |
| S8-final-viral-combined_k141_23370   | [full] | 6667 | No  | NA   | 0 | 1 | Not-determined | Genome-fragment | NA | 0     | 0     |
| S17-final-viral-combined_k141_106310 | [full] | 8631 | No  | NA   | 0 | 0 | Low-quality    | Genome-fragment | NA | 11.67 | 0     |
| S8-final-viral-combined_k141_11700   | [full] | 1112 | No  | NA   | 0 | 0 | Not-determined | Genome-fragment | NA | 0     | 0     |
| S11-final-viral-combined_k141_100692 | [full] | 8614 | No  | NA   | 2 | 0 | Low-quality    | Genome-fragment | NA | 15.14 | 0     |
| S8-final-viral-combined_k141_138666  | [full] | 7560 | No  | NA   | 0 | 7 | Not-determined | Genome-fragment | NA | 0     | 0     |
| S8-final-viral-combined_k141_179521  | [full] | 1622 | No  | NA   | 0 | 0 | Not-determined | Genome-fragment | NA | 0     | 0     |
| S8-final-viral-combined_k141_207644  | [full] | 3551 | No  | NA   | 0 | 2 | Not-determined | Genome-fragment | NA | 0     | 0     |
| S8-final-viral-combined_k141_69477   | [full] | 5079 | No  | NA   | 0 | 2 | Not-determined | Genome-fragment | NA | 0     | 0     |
| S2_k141_134600                       | [full] | 8617 | No  | NA   | 7 | 1 | Low-quality    | Genome-fragment | NA | 15.95 | 0     |
| S8-final-viral-combined_k141_103855  | [full] | 6586 | No  | NA   | 0 | 5 | Not-determined | Genome-fragment | NA | 0     | 0     |
| S8-final-viral-combined_k141_242285  | [full] | 8653 | No  | NA   | 0 | 3 | Not-determined | Genome-fragment | NA | 0     | 0     |
| S8-final-viral-combined_k141_219132  | [full] | 7421 | No  | NA   | 0 | 7 | Not-determined | Genome-fragment | NA | 0     | 0     |
| S8-final-viral-combined_k141_161405  | [full] | 1104 | No  | NA   | 0 | 0 | Not-determined | Genome-fragment | NA | 0     | 0     |
| S1_k141_154304                       | [full] | 8640 | No  | NA   | 4 | 0 | Low-quality    | Genome-fragment | NA | 14.56 | 0     |
| S8-final-viral-combined_k141_138711  | [full] | 1158 | No  | NA   | 0 | 0 | Not-determined | Genome-fragment | NA | 0     | 0     |
| S8-final-viral-combined_k141_186155  | [full] | 2203 | No  | NA   | 0 | 2 | Not-determined | Genome-fragment | NA | 0     | 0     |
| S8-final-viral-combined_k141_127042  | [full] | 2817 | No  | NA   | 0 | 1 | Not-determined | Genome-fragment | NA | 0     | 0     |
| S12-final-viral-combined_k141_156504 | [full] | 8642 | No  | NA   | 4 | 0 | Low-quality    | Genome-fragment | NA | 19.59 | 0     |
| S8-final-viral-combined_k141_196165  | [full] | 1076 | No  | NA   | 0 | 2 | Not-determined | Genome-fragment | NA | 0     | 0     |
| S8-final-viral-combined_k141_23405   | [full] | 4065 | No  | NA   | 0 | 3 | Not-determined | Genome-fragment | NA | 0     | 0     |
| S8-final-viral-combined_k141_265263  | [full] | 2665 | No  | NA   | 0 | 0 | Not-determined | Genome-fragment | NA | 0     | 0     |
| S9-final-viral-combined_k141_113640  | [full] | 8643 | Yes | 7350 | 3 | 1 | Low-quality    | Genome-fragment | NA | 18.2  | 14.96 |
| S3_k141_80234                        | [full] | 8644 | No  | NA   | 6 | 0 | Low-quality    | Genome-fragment | NA | 13.57 | 0     |
| S11-final-viral-combined_k141_317588 | [full] | 8646 | No  | NA   | 0 | 1 | Low-quality    | Genome-fragment | NA | 20.06 | 0     |
| S2_k141_119166                       | [full] | 8646 | No  | NA   | 0 | 0 | Low-quality    | Genome-fragment | NA | 3.98  | 0     |
| S17-final-viral-combined_k141_147673 | [full] | 8646 | No  | NA   | 1 | 0 | Low-quality    | Genome-fragment | NA | 13.08 | 0     |
| S8-final-viral-combined_k141_92546   | [full] | 2443 | No  | NA   | 0 | 1 | Not-determined | Genome-fragment | NA | 0     | 0     |
| S8-final-viral-combined_k141_242362  | [full] | 1930 | No  | NA   | 0 | 0 | Not-determined | Genome-fragment | NA | 0     | 0     |
| S8-final-viral-combined_k141_173181  | [full] | 4717 | No  | NA   | 0 | 0 | Not-determined | Genome-fragment | NA | 0     | 0     |
| S8-final-viral-combined_k141_127103  | [full] | 2052 | No  | NA   | 0 | 0 | Not-determined | Genome-fragment | NA | 0     | 0     |
| S8-final-viral-combined_k141_265301  | [full] | 4064 | No  | NA   | 0 | 3 | Not-determined | Genome-fragment | NA | 0     | 0     |
| S17-final-viral-combined_k141_19239  | [full] | 8651 | Yes | 1916 | 0 | 5 | Low-quality    | Genome-fragment | NA | 1.56  | 77.85 |
| S8-final-viral-combined_k141_219149  | [full] | 1644 | No  | NA   | 0 | 1 | Not-determined | Genome-fragment | NA | 0     | 0     |
| S8-final-viral-combined_k141_29202   | [full] | 2114 | No  | NA   | 0 | 1 | Not-determined | Genome-fragment | NA | 0     | 0     |
| S8-final-viral-combined_k141_115565  | [full] | 1685 | No  | NA   | 0 | 0 | Not-determined | Genome-fragment | NA | 0     | 0     |
| S8-final-viral-combined_k141_172150  | [full] | 3010 | No  | NA   | 0 | 1 | Not-determined | Genome-fragment | NA | 0     | 0     |
| S11-final-viral-combined_k141_7321   | [full] | 8653 | No  | NA   | 4 | 0 | Low-quality    | Genome-fragment | NA | 19.57 | 0     |
| S8-final-viral-combined_k141_103941  | [full] | 4540 | No  | NA   | 0 | 3 | Not-determined | Genome-fragment | NA | 0     | 0     |
| S6-final-viral-combined_k141_140565  | [full] | 8654 | No  | NA   | 1 | 0 | Low-quality    | Genome-fragment | NA | 9.71  | 0     |
| S8_k141_201720                       | [full] | 8655 | No  | NA   | 0 | 4 | Low-quality    | Genome-fragment | NA | 8.43  | 0     |
| S6-final-viral-combined_k141_140087  | [full] | 8656 | No  | NA   | 2 | 0 | Low-quality    | Genome-fragment | NA | 23.93 | 0     |
| S8-final-viral-combined_k141_439     | [full] | 2684 | No  | NA   | 0 | 2 | Not-determined | Genome-fragment | NA | 0     | 0     |
| S8-final-viral-combined_k141_115631  | [full] | 4597 | No  | NA   | 0 | 0 | Not-determined | Genome-fragment | NA | 0     | 0     |
| S8-final-viral-combined_k141_447     | [full] | 2614 | No  | NA   | 0 | 0 | Not-determined | Genome-fragment | NA | 0     | 0     |
| S8-final-viral-combined_k141_69667   | [full] | 1558 | No  | NA   | 0 | 0 | Not-determined | Genome-fragment | NA | 0     | 0     |
| S5-final-viral-combined_k141_106116  | [full] | 8659 | Yes | 7248 | 0 | 1 | Low-quality    | Genome-fragment | NA | 10.71 | 16.3  |
| S8-final-viral-combined_k141_81209   | [full] | 1238 | No  | NA   | 0 | 1 | Not-determined | Genome-fragment | NA | 0     | 0     |
| S8-final-viral-combined_k141_23659   | [full] | 3495 | No  | NA   | 0 | 0 | Not-determined | Genome-fragment | NA | 0     | 0     |
| S8-final-viral-combined_k141_219251  | [full] | 4714 | No  | NA   | 0 | 0 | Not-determined | Genome-fragment | NA | 0     | 0     |
| S8-final-viral-combined_k141_81224   | [full] | 6295 | No  | NA   | 0 | 6 | Not-determined | Genome-fragment | NA | 0     | 0     |
| S9-final-viral-combined_k141_28591   | [full] | 8672 | No  | NA   | 4 | 1 | Low-quality    | Genome-fragment | NA | 17.69 | 0     |
| S5-final-viral-combined_k141_138120  | [full] | 8685 | No  | NA   | 0 | 0 | Low-quality    | Genome-fragment | NA | 0     | 0     |
| S1-final-viral-combined_k141_10521   | [full] | 8686 | Yes | 3874 | 2 | 3 | Low-quality    | Genome-fragment | NA | 4.19  | 55.4  |
| S5-final-viral-combined_k141_65262   | [full] | 8686 | No  | NA   | 0 | 1 | Low-quality    | Genome-fragment | NA | 26.86 | 0     |
| S8-final-viral-combined_k141_86868   | [full] | 8690 | Yes | 5348 | 0 | 1 | Low-quality    | Genome-fragment | NA | 0.85  | 38.46 |
| S1_k141_96145                        | [full] | 8693 | No  | NA   | 0 | 0 | Not-determined | Genome-fragment | NA | 19.31 | 0     |
| S8-final-viral-combined_k141_508     | [full] | 4719 | No  | NA   | 0 | 1 | Not-determined | Genome-fragment | NA | 0     | 0     |
| S8-final-viral-combined_k141_106129  | [full] | 3331 | No  | NA   | 0 | 2 | Not-determined | Genome-fragment | NA | 0     | 0     |
| S6-final-viral-combined_k141_30707   | [full] | 8698 | Yes | 1760 | 0 | 1 |                |                 |    |       |       |



|                                      |        |       |     |      |    |    |                |                 |                 |       |       |
|--------------------------------------|--------|-------|-----|------|----|----|----------------|-----------------|-----------------|-------|-------|
| S8-final-viral-combined_k141_69829   | [full] | 1831  | No  | NA   | 0  | 2  | Not-determined | Genome-fragment | NA              | 0     | 0     |
| S8-final-viral-combined_k141_46677   | [full] | 1258  | No  | NA   | 0  | 0  | Not-determined | Genome-fragment | NA              | 0     | 0     |
| S2-final-viral-combined_k141_80803   | [full] | 8760  | No  | NA   | 0  | 0  | Low-quality    | Genome-fragment | NA              | 27.22 | 0     |
| S1-final-viral-combined_k141_21211   | [full] | 8771  | No  | NA   | 11 | 0  | Low-quality    | Genome-fragment | NA              | 19.02 | 0     |
| S8-final-viral-combined_k141_127331  | [full] | 1665  | No  | NA   | 0  | 0  | 1              | Not-determined  | Genome-fragment | NA    | 0     |
| S8-final-viral-combined_k141_7521    | [full] | 2118  | No  | NA   | 0  | 0  | 0              | Not-determined  | Genome-fragment | NA    | 0     |
| S2-final-viral-combined_k141_179334  | [full] | 8775  | Yes | 6775 | 1  | 0  | 2              | Low-quality     | Genome-fragment | 10.37 | 22.79 |
| S2_k141_31426                        |        | 8776  | No  | NA   | 0  | 0  | 0              | Low-quality     | Genome-fragment | 9     | 0     |
| S8-final-viral-combined_k141_69899   | [full] | 1849  | No  | NA   | 0  | 0  | 2              | Not-determined  | Genome-fragment | NA    | 0     |
| S11-final-viral-combined_k141_232643 | [full] | 8791  | No  | NA   | 1  | 0  | 0              | Low-quality     | Genome-fragment | 8.54  | 0     |
| S4_k141_75002                        |        | 8796  | No  | NA   | 0  | 0  | 3              | Low-quality     | Genome-fragment | 3.65  | 0     |
| S8-final-viral-combined_k141_253085  | [full] | 2196  | No  | NA   | 0  | 0  | 0              | Not-determined  | Genome-fragment | NA    | 0     |
| S11-final-viral-combined_k141_293628 | [full] | 8799  | No  | NA   | 0  | 0  | 3              | Low-quality     | Genome-fragment | 11.54 | 0     |
| S6-final-viral-combined_k141_64607   | [full] | 8812  | No  | NA   | 1  | 0  | 1              | Low-quality     | Genome-fragment | 16.5  | 0     |
| S8-final-viral-combined_k141_46747   | [full] | 2067  | No  | NA   | 0  | 0  | 1              | Not-determined  | Genome-fragment | NA    | 0     |
| S1-final-viral-combined_k141_124544  | [full] | 8816  | No  | NA   | 0  | 0  | 1              | Low-quality     | Genome-fragment | 28.15 | 0     |
| S8-final-viral-combined_k141_58404   | [full] | 1428  | No  | NA   | 0  | 0  | 0              | Not-determined  | Genome-fragment | NA    | 0     |
| S8-final-viral-combined_k141_88533   | [full] | 8817  | No  | NA   | 4  | 0  | 0              | Low-quality     | Genome-fragment | 17.94 | 0     |
| S12-final-viral-combined_k141_7270   | [full] | 8822  | No  | NA   | 5  | 0  | 0              | Low-quality     | Genome-fragment | 27.38 | 0     |
| S5_k141_115010                       |        | 8824  | No  | NA   | 5  | 0  | 0              | Low-quality     | Genome-fragment | 21.87 | 0     |
| S2_k141_212515                       |        | 8824  | No  | NA   | 0  | 0  | 1              | Low-quality     | Genome-fragment | 13.84 | 0     |
| S8-final-viral-combined_k141_127426  | [full] | 6049  | No  | NA   | 0  | 1  | Not-determined | Genome-fragment | NA              | 0     |       |
| S8-final-viral-combined_k141_115884  | [full] | 2460  | No  | NA   | 0  | 0  | 1              | Not-determined  | Genome-fragment | NA    | 0     |
| S8-final-viral-combined_k141_20238   | [full] | 8827  | No  | NA   | 0  | 0  | 0              | Low-quality     | Genome-fragment | 13.36 | 0     |
| S8-final-viral-combined_k141_139316  | [full] | 2169  | No  | NA   | 0  | 0  | 3              | Not-determined  | Genome-fragment | NA    | 0     |
| S8-final-viral-combined_k141_93117   | [full] | 2721  | No  | NA   | 0  | 0  | 1              | Not-determined  | Genome-fragment | NA    | 0     |
| S11-final-viral-combined_k141_192075 | [full] | 8837  | No  | NA   | 2  | 0  | 0              | Low-quality     | Genome-fragment | 8.8   | 0     |
| S8-final-viral-combined_k141_127464  | [full] | 2208  | No  | NA   | 0  | 0  | 0              | Not-determined  | Genome-fragment | NA    | 0     |
| S8-final-viral-combined_k141_46812   | [full] | 1416  | No  | NA   | 0  | 0  | 0              | Low-quality     | Genome-fragment | NA    | 0     |
| S11_k141_76291                       |        | 8844  | No  | NA   | 3  | 0  | 0              | Low-quality     | Genome-fragment | 18.7  | 0     |
| S1-final-viral-combined_k141_122127  | [full] | 8852  | No  | NA   | 1  | 0  | 0              | Low-quality     | Genome-fragment | 42.43 | 0     |
| S8-final-viral-combined_k141_185085  | [full] | 2216  | No  | NA   | 0  | 0  | 1              | Not-determined  | Genome-fragment | NA    | 0     |
| S2_k141_154092                       |        | 8855  | No  | NA   | 1  | 1  | 1              | Low-quality     | Genome-fragment | 17.91 | 0     |
| S4-final-viral-combined_k141_88801   | [full] | 8856  | Yes | 3121 | 1  | 2  | Low-quality    | Genome-fragment | 1.08            | 64.76 |       |
| S8-final-viral-combined_k141_212127  | [full] | 1652  | No  | NA   | 0  | 1  | 1              | Not-determined  | Genome-fragment | NA    | 0     |
| S8-final-viral-combined_k141_8361    | [full] | 4310  | No  | NA   | 0  | 4  | Not-determined | Genome-fragment | NA              | 0     |       |
| S8-final-viral-combined_k141_161971  | [full] | 2650  | No  | NA   | 0  | 0  | 0              | Not-determined  | Genome-fragment | NA    | 0     |
| S11-final-viral-combined_k141_68804  | [full] | 8858  | No  | NA   | 5  | 0  | 0              | Low-quality     | Genome-fragment | 22.9  | 0     |
| S8-final-viral-combined_k141_219620  | [full] | 2079  | No  | NA   | 0  | 0  | 0              | Not-determined  | Genome-fragment | NA    | 0     |
| S8-final-viral-combined_k141_833     | [full] | 1532  | No  | NA   | 0  | 1  | 1              | Not-determined  | Genome-fragment | NA    | 0     |
| S8-final-viral-combined_k141_139370  | [full] | 1835  | No  | NA   | 0  | 0  | 1              | Not-determined  | Genome-fragment | NA    | 0     |
| S12-final-viral-combined_k141_15414  | [full] | 8859  | No  | NA   | 1  | 1  | 1              | Low-quality     | Genome-fragment | 20.6  | 0     |
| S8-final-viral-combined_k141_173732  | [full] | 2029  | No  | NA   | 0  | 2  | 2              | Not-determined  | Genome-fragment | NA    | 0     |
| S8-final-viral-combined_k141_115995  | [full] | 1316  | No  | NA   | 0  | 1  | 1              | Not-determined  | Genome-fragment | NA    | 0     |
| S8-final-viral-combined_k141_127521  | [full] | 2123  | No  | NA   | 0  | 1  | 1              | Not-determined  | Genome-fragment | NA    | 0     |
| S12-final-viral-combined_k141_311448 | [full] | 8862  | No  | NA   | 5  | 0  | 0              | Low-quality     | Genome-fragment | 26.07 | 0     |
| S8-final-viral-combined_k141_175198  | [full] | 8862  | No  | NA   | 3  | 0  | 0              | Low-quality     | Genome-fragment | 14.62 | 0     |
| S1-final-viral-combined_k141_212913  | [full] | 8869  | No  | NA   | 2  | 0  | 0              | Low-quality     | Genome-fragment | 7.21  | 0     |
| S8-final-viral-combined_k141_857     | [full] | 2204  | No  | NA   | 0  | 0  | 0              | Not-determined  | Genome-fragment | NA    | 0     |
| S9_k141_11239                        |        | 8870  | No  | NA   | 7  | 0  | 0              | Low-quality     | Genome-fragment | 20.34 | 0     |
| S8-final-viral-combined_k141_81597   | [full] | 24279 | No  | NA   | 3  | 1  | Medium-quality | Genome-fragment | 56.69           | 0     |       |
| S11_k141_286267                      |        | 1123  | No  | NA   | 0  | 0  | 0              | Not-determined  | Genome-fragment | NA    | 0     |
| S12-final-viral-combined_k141_167650 | [full] | 8871  | No  | NA   | 1  | 0  | 0              | Low-quality     | Genome-fragment | 11.92 | 0     |
| S8-final-viral-combined_k141_70070   | [full] | 2835  | No  | NA   | 0  | 0  | 0              | Not-determined  | Genome-fragment | NA    | 0     |
| S8-final-viral-combined_k141_35268   | [full] | 1187  | No  | NA   | 0  | 1  | 1              | Not-determined  | Genome-fragment | NA    | 0     |
| S2-final-viral-combined_k141_188530  | [full] | 8873  | No  | NA   | 0  | 0  | 1              | Low-quality     | Genome-fragment | 21.75 | 0     |
| S4-final-viral-combined_k141_64074   | [full] | 8874  | No  | NA   | 4  | 0  | 0              | Low-quality     | Genome-fragment | 13.11 | 0     |
| S11-final-viral-combined_k141_16121  | [full] | 8878  | No  | NA   | 4  | 0  | 0              | Low-quality     | Genome-fragment | 14.31 | 0     |
| S8-final-viral-combined_k141_254510  | [full] | 2766  | No  | NA   | 0  | 3  | 3              | Not-determined  | Genome-fragment | NA    | 0     |
| S8-final-viral-combined_k141_116015  | [full] | 6035  | No  | NA   | 0  | 7  | 7              | Not-determined  | Genome-fragment | NA    | 0     |
| S8-final-viral-combined_k141_104445  | [full] | 4369  | No  | NA   | 0  | 1  | 1              | Not-determined  | Genome-fragment | NA    | 0     |
| S1-final-viral-combined_k141_65772   | [full] | 8883  | No  | NA   | 0  | 1  | 1              | Low-quality     | Genome-fragment | 21.5  | 0     |
| S8-final-viral-combined_k141_162036  | [full] | 2305  | No  | NA   | 0  | 2  | 2              | Not-determined  | Genome-fragment | NA    | 0     |
| S12-final-viral-combined_k141_107016 | [full] | 8885  | No  | NA   | 1  | 5  | 5              | Low-quality     | Genome-fragment | 11    | 0     |
| S8-final-viral-combined_k141_150030  | [full] | 1248  | No  | NA   | 0  | 0  | 0              | Not-determined  | Genome-fragment | NA    | 0     |
| S8-final-viral-combined_k141_35250   | [full] | 2073  | No  | NA   | 0  | 0  | 0              | Not-determined  | Genome-fragment | NA    | 0     |
| S12-final-viral-combined_k141_37350  | [full] | 8898  | No  | NA   | 2  | 1  | 1              | Low-quality     | Genome-fragment | 9.39  | 0     |
| S1-final-viral-combined_k141_13687   | [full] | 8900  | No  | NA   | 3  | 1  | 1              | Low-quality     | Genome-fragment | 18.1  | 0     |
| S12-final-viral-combined_k141_30924  | [full] | 8903  | No  | NA   | 0  | 1  | 1              | Low-quality     | Genome-fragment | 23.51 | 0     |
| S8-final-viral-combined_k141_58565   | [full] | 1450  | No  | NA   | 0  | 1  | 1              | Not-determined  | Genome-fragment | NA    | 0     |
| S11-final-viral-combined_k141_128335 | [full] | 8904  | No  | NA   | 3  | 0  | 0              | Low-quality     | Genome-fragment | 22.76 | 0     |
| S8-final-viral-combined_k141_127559  | [full] | 7779  | No  | NA   | 0  | 4  | 4              | Not-determined  | Genome-fragment | NA    | 0     |
| S8-final-viral-combined_k141_70160   | [full] | 2200  | No  | NA   | 0  | 2  | 2              | Not-determined  | Genome-fragment | NA    | 0     |
| S8-final-viral-combined_k141_231426  | [full] | 1687  | No  | NA   | 0  | 0  | 0              | Not-determined  | Genome-fragment | NA    | 0     |
| S11_k141_286267                      |        | 8908  | No  | NA   | 11 | 0  | 0              | Not-determined  | Genome-fragment | NA    | 20.13 |
| S8-final-viral-combined_k141_150706  | [full] | 5095  | No  | NA   | 0  | 0  | 0              | Not-determined  | Genome-fragment | NA    | 0     |
| S8-final-viral-combined_k141_173926  | [full] | 1702  | No  | NA   | 0  | 1  | 1              | Not-determined  | Genome-fragment | NA    | 0     |
| S1-final-viral-combined_k141_369073  | [full] | 8908  | No  | NA   | 0  | 0  | 0              | Low-quality     | Genome-fragment | 11.46 | 0     |
| S3-final-viral-combined_k141_70401   | [full] | 8909  | No  | NA   | 0  | 0  | 0              | Low-quality     | Genome-fragment | 30.83 | 0     |
| S8-final-viral-combined_k141_93191   | [full] | 1269  | No  | NA   | 0  | 0  | 0              | Not-determined  | Genome-fragment | NA    | 0     |
| S8-final-viral-combined_k141_231471  | [full] | 4976  | No  | NA   | 0  | 3  | 3              | Not-determined  | Genome-fragment | NA    | 0     |
| S1-final-viral-combined_k141_97641   | [full] | 8911  | No  | NA   | 0  | 0  | 0              | Low-quality     | Genome-fragment | 21.51 | 0     |
| S11-final-viral-combined_k141_75233  | [full] | 8920  | No  | NA   | 0  | 6  | 0              | Low-quality     | Genome-fragment | NA    | 0     |
| S8-final-viral-combined_k141_46948   | [full] | 4117  | No  | NA   | 0  | 3  | 3              | Not-determined  | Genome-fragment | NA    | 0     |
| S8-final-viral-combined_k141_231491  | [full] | 1616  | No  | NA   | 0  | 1  | 1              | Not-determined  | Genome-fragment | NA    | 0     |
| S5_k141_115446                       |        | 8923  | No  | NA   | 5  | 0  | 0              | Low-quality     | Genome-fragment | 19.92 | 0     |
| S8-final-viral-combined_k141_162152  | [full] | 1400  | No  | NA   | 0  | 2  | 2              | Not-determined  | Genome-fragment | NA    | 0     |
| S1-final-viral-combined_k141_27132   | [full] | 8929  | No  | NA   | 0  | 5  | 5              | Low-quality     | Genome-fragment | 5.32  | 0     |
| S1-final-viral-combined_k141_76465   | [full] | 8932  | Yes | 4552 | 3  | 3  | 3              | Low-quality     | Genome-fragment | 6.03  | 49.04 |
| S4-final-viral-combined_k141_88335   | [full] | 8942  | Yes | 2378 | 1  | 3  | 3              | Low-quality     | Genome-fragment | 5.34  | 73.41 |
| S8-final-viral-combined_k141_231512  | [full] | 2589  | No  | NA   | 0  | 3  | 3              | Not-determined  | Genome-fragment | NA    | 0     |
| S8-final-viral-combined_k141_9811    | [full] | 2895  | No  | NA   | 0  | 0  | 0              | Not-determined  | Genome-fragment | NA    | 0     |
| S11-final-viral-combined_k141_325427 | [full] | 8944  | No  | NA   | 4  | 0  | 0              | Low-quality     | Genome-fragment | 19.5  | 0     |
| S8-final-viral-combined_k141_208421  | [full] | 1250  | No  | NA   | 0  | 0  | 0              | Not-determined  | Genome-fragment | NA    | 0     |
| S8-final-viral-combined_k141_702461  | [full] | 1291  | No  | NA   | 0  | 0  | 0              | Not-determined  | Genome-fragment | NA    | 0     |
| S8-final-viral-combined_k141_169865  | [full] | 15459 | No  | NA   | 0  | 16 | 16             | Not-determined  | Genome-fragment | NA    | 0     |
| S8-final-viral-combined_k141_116131  | [full] | 3208  | No  | NA   | 0  | 2  | 2              | Not-determined  | Genome-fragment | NA    | 0     |
| S8-final-viral-combined_k141_244898  | [full] | 8946  | No  | NA   | 2  | 0  | 0              | Low-quality     | Genome-fragment | 18.37 | 0     |
| S3-final-viral-combined_k141_102138  | [full] | 8949  | No  | NA   | 0  | 0  | 0              | Low-quality     | Genome-fragment | 15.14 | 0     |
| S9-final-viral-combined_k141_73446   | [full] | 8950  | No  | NA   | 5  | 0  | 0              | Low-quality     | Genome-fragment | 20.52 | 0     |
| S11-final-viral-combined_k141_53794  | [full] | 8968  | No  | NA   | 4  | 0  | 0              | Low-quality     | Genome-fragment | 24.35 | 0     |
| S1-final-viral-combined_k141_184211  | [full] | 8976  | No  | NA   | 0  | 1  | 1              | Low-quality     | Genome-fragment | 20.04 | 0     |
| S8-final-viral-combined_k141_139476  | [full] | 3263  | No  | NA   | 0  | 3  | 3              | Not-determined  | Genome-fragment | NA    | 0     |
| S8-final-viral-combined_k141_70295   | [full] | 2107  | No  | NA   | 0  | 0  | 0              | Not-determined  | Genome-fragment | NA    | 0     |
| S8-final-viral-combined_k141_212351  | [full] | 8985  | No  | NA   | 0  | 1  | 1              | Low-quality     | Genome-fragment | 7.37  | 0     |
| S9-final-viral-combined_k141_64838   | [full] | 8987  | No  | NA   | 0  | 0  | 0              | Low-quality     | Genome-fragment | 10.14 | 0     |
| S2_k141_134497                       |        | 8988  | No  | NA   | 0  | 2  | 2              | Low-quality     | Genome-fragment | 11.2  | 0     |
| S8-final-viral-combined_k141_127725  | [full] | 1946  | No  | NA   | 0  | 1  | 1              | Not-determined  | Genome-fragment | NA    | 0     |
| S9-final-viral-combined_k141_35469   | [full] | 8994  | No  | NA   | 4  | 0  | 0              | Low-quality     | Genome-fragment | 22.06 | 0     |
| S2-final-viral-combined_k141_219799  | [full] | 8994  | No  | NA   | 5  | 0  | 0              | Low-quality     | Genome-fragment | 17.88 | 0     |
| S8-final-viral-combined_k141_231619  | [full] | 2719  | No  | NA   | 0  | 1  | 1              | Not-determined  | Genome-fragment | NA    | 0     |
| S8-final-viral-combined_k141_104645  | [full] | 1468  | No  | NA   | 0  | 0  | 0              | Not-determined  | Genome-fragment | NA    | 0     |
| S8-final-viral-combined_k141_127729  | [full] | 2386  | No  | NA   | 0  | 1  | 1              | Not-determined  | Genome-fragment | NA    | 0     |
| S7-final-viral-combined_k141_65398   | [full] | 8997  | No  | NA   | 0  | 1  | 1              | Low-quality     | Genome-fragment | 8.45  | 0     |
| S17-k141_260959                      |        | 8997  | No  | NA   | 0  | 0  | 0              | Low-quality     | Genome-fragment | 16.59 | 0     |
| S8-final-viral-combined_k141_24140   | [full] | 1246  | No  | NA   | 0  | 0  | 0              | Not-determined  | Genome-fragment | NA    | 0     |
| S8-final-viral-combined_k141_104703  | [full] | 1972  | No  | NA   | 0  | 0  | 0              | Not-determined  | Genome-fragment | NA    | 0     |
| S2-final-viral-combined_k141_125414  | [full] | 9000  | No  | NA   | 0  | 2  | 2              | Low-quality     | Genome-fragment | 6.35  | 0     |
| S8-final-viral-combined_k141_162760  | [full] | 5815  | No  | NA   | 0  | 0  | 0              | Not-determined  | Genome-fragment | NA    | 0     |
| S8-final-viral-combined_k141_162616  | [full] | 1972  | No  | NA   | 0  | 2  | 2              | Not-determined  | Genome-fragment | NA    | 0     |
| S8-final-viral-combined_k141_162633  | [full] | 2458  | No  | NA   | 0  | 0  | 0              | Not-determined  | Genome-fragment | NA    | 0     |
| S8-final-viral-combined_k141_185495  | [full] | 1458  | No  | NA   | 0  | 2  | 2              | Not-determined  | Genome-fragment | NA    | 0     |
| S6-final-viral-comb                  |        |       |     |      |    |    |                |                 |                 |       |       |



|                                      |        |       |     |       |    |    |                |                 |    |       |       |
|--------------------------------------|--------|-------|-----|-------|----|----|----------------|-----------------|----|-------|-------|
| S8-final-viral-combined_k141_243360  | [full] | 1014  | No  | NA    | 0  | 1  | Not-determined | Genome-fragment | NA | 0     | 0     |
| S8-final-viral-combined_k141_70572   | [full] | 7156  | No  | NA    | 0  | 6  | Not-determined | Genome-fragment | NA | 0     | 0     |
| S4_k141_69815                        |        | 9102  | No  | NA    | 4  | 1  | Low-quality    | Genome-fragment | NA | 6.03  | 0     |
| S7-final-viral-combined_k141_100522  | [full] | 9118  | Yes | 3528  | 1  | 1  | Low-quality    | Genome-fragment | NA | 1.01  | 61.31 |
| S8-final-viral-combined_k141_254643  | [full] | 2096  | No  | NA    | 0  | 1  | Not-determined | Genome-fragment | NA | 0     | 0     |
| S2_k141_160025                       |        | 9128  | No  | NA    | 2  | 1  | Low-quality    | Genome-fragment | NA | 28.1  | 0     |
| S8-final-viral-combined_k141_185683  | [full] | 1262  | No  | NA    | 0  | 1  | Not-determined | Genome-fragment | NA | 0     | 0     |
| S8-final-viral-combined_k141_186189  | [full] | 9128  | No  | NA    | 8  | 0  | Low-quality    | Genome-fragment | NA | 21.29 | 0     |
| S8-final-viral-combined_k141_139171  | [full] | 2391  | No  | NA    | 0  | 1  | Not-determined | Genome-fragment | NA | 0     | 0     |
| S8-final-viral-combined_k141_12455   | [full] | 1727  | No  | NA    | 0  | 3  | Not-determined | Genome-fragment | NA | 0     | 0     |
| S17-final-viral-combined_k141_254248 | [full] | 9129  | No  | NA    | 0  | 3  | Low-quality    | Genome-fragment | NA | 6.56  | 0     |
| S8-final-viral-combined_k141_25605   | [full] | 2469  | No  | NA    | 2  | 2  | Not-determined | Genome-fragment | NA | 23.46 | 0     |
| S17-final-viral-combined_k141_159480 | [full] | 9132  | No  | NA    | 7  | 0  | Low-quality    | Genome-fragment | NA | 5.67  | 0     |
| S2_k141_130858                       |        | 9133  | No  | NA    | 3  | 1  | Low-quality    | Genome-fragment | NA | 4.79  | 0     |
| S17-final-viral-combined_k141_140074 | [full] | 9134  | No  | NA    | 0  | 4  | Low-quality    | Genome-fragment | NA | 12.11 | 0     |
| S8-final-viral-combined_k141_140938  | [full] | 8853  | No  | NA    | 0  | 5  | Not-determined | Genome-fragment | NA | 14.55 | 28.78 |
| S4-final-viral-combined_k141_52994   | [full] | 9137  | No  | NA    | 2  | 1  | Low-quality    | Genome-fragment | NA | 0     | 0     |
| S8-final-viral-combined_k141_231895  | [full] | 3052  | No  | NA    | 0  | 1  | Not-determined | Genome-fragment | NA | 0     | 0     |
| S12_k141_4487                        |        | 9129  | Yes | 6509  | 5  | 2  | Low-quality    | Genome-fragment | NA | 0     | 0     |
| S8-final-viral-combined_k141_12497   | [full] | 1969  | No  | NA    | 0  | 0  | Not-determined | Genome-fragment | NA | 0     | 0     |
| S8-final-viral-combined_k141_24438   | [full] | 21855 | No  | NA    | 0  | 19 | Not-determined | Genome-fragment | NA | 0     | 0     |
| S8-final-viral-combined_k141_151117  | [full] | 1250  | No  | NA    | 0  | 1  | Not-determined | Genome-fragment | NA | 0     | 0     |
| S11-final-viral-combined_k141_177049 | [full] | 9141  | No  | NA    | 2  | 0  | Low-quality    | Genome-fragment | NA | 11.9  | 0     |
| S8-final-viral-combined_k141_243433  | [full] | 1196  | No  | NA    | 0  | 1  | Not-determined | Genome-fragment | NA | 0     | 0     |
| S8-final-viral-combined_k141_35758   | [full] | 4477  | No  | NA    | 0  | 3  | Not-determined | Genome-fragment | NA | 21.27 | 0     |
| S8-final-viral-combined_k141_60009   | [full] | 9160  | No  | NA    | 2  | 0  | Low-quality    | Genome-fragment | NA | 19.99 | 0     |
| S8-final-viral-combined_k141_162581  | [full] | 1248  | No  | NA    | 0  | 2  | Not-determined | Genome-fragment | NA | 0     | 0     |
| S8-final-viral-combined_k141_254495  | [full] | 5867  | No  | NA    | 0  | 0  | Not-determined | Genome-fragment | NA | 0     | 0     |
| S11-final-viral-combined_k141_87215  | [full] | 9154  | No  | NA    | 0  | 0  | Low-quality    | Genome-fragment | NA | 19.99 | 0     |
| S8-final-viral-combined_k141_266073  | [full] | 1204  | No  | NA    | 0  | 0  | Not-determined | Genome-fragment | NA | 0     | 0     |
| S8-final-viral-combined_k141_82161   | [full] | 1839  | No  | NA    | 0  | 1  | Not-determined | Genome-fragment | NA | 24.71 | 0     |
| S17-final-viral-combined_k141_109199 | [full] | 9165  | No  | NA    | 0  | 0  | Low-quality    | Genome-fragment | NA | 0     | 0     |
| S8-final-viral-combined_k141_151138  | [full] | 2753  | No  | NA    | 0  | 2  | Not-determined | Genome-fragment | NA | 0     | 0     |
| S7-final-viral-combined_k141_106934  | [full] | 9168  | No  | NA    | 1  | 0  | Low-quality    | Genome-fragment | NA | 20.64 | 0     |
| S17-final-viral-combined_k141_234067 | [full] | 9168  | No  | NA    | 2  | 0  | Low-quality    | Genome-fragment | NA | 11.14 | 0     |
| S8-final-viral-combined_k141_11945   | [full] | 1068  | No  | NA    | 0  | 1  | Not-determined | Genome-fragment | NA | 0     | 0     |
| S17-k141_191299                      |        | 9168  | No  | NA    | 2  | 0  | Low-quality    | Genome-fragment | NA | 16.81 | 0     |
| S1-final-viral-combined_k141_155936  | [full] | 9169  | No  | NA    | 0  | 4  | Low-quality    | Genome-fragment | NA | 5.84  | 0     |
| S8-final-viral-combined_k141_59247   | [full] | 4209  | No  | NA    | 1  | 1  | Not-determined | Genome-fragment | NA | 16.95 | 0     |
| S8-final-viral-combined_k141_254525  | [full] | 1804  | No  | NA    | 0  | 1  | Not-determined | Genome-fragment | NA | 0     | 0     |
| S12-final-viral-combined_k141_49332  | [full] | 9171  | No  | NA    | 0  | 5  | Low-quality    | Genome-fragment | NA | 8.51  | 0     |
| S8-final-viral-combined_k141_105025  | [full] | 1279  | No  | NA    | 0  | 2  | Not-determined | Genome-fragment | NA | 0     | 0     |
| S8-final-viral-combined_k141_208837  | [full] | 1618  | No  | NA    | 0  | 2  | Not-determined | Genome-fragment | NA | 0     | 0     |
| S8-final-viral-combined_k141_59274   | [full] | 8168  | No  | NA    | 0  | 5  | Not-determined | Genome-fragment | NA | 0     | 0     |
| S8-final-viral-combined_k141_174270  | [full] | 2180  | No  | NA    | 0  | 1  | Not-determined | Genome-fragment | NA | 0     | 0     |
| S8-final-viral-combined_k141_197947  | [full] | 2354  | No  | NA    | 0  | 1  | Not-determined | Genome-fragment | NA | 0     | 0     |
| S1-final-viral-combined_k141_1470    | [full] | 9178  | Yes | 1864  | 1  | 5  | Low-quality    | Genome-fragment | NA | 2.82  | 79.69 |
| S8-final-viral-combined_k141_162632  | [full] | 2351  | No  | NA    | 0  | 1  | Not-determined | Genome-fragment | NA | 0     | 0     |
| S8-final-viral-combined_k141_139937  | [full] | 1871  | No  | NA    | 0  | 1  | Not-determined | Genome-fragment | NA | 0     | 0     |
| S8-final-viral-combined_k141_197059  | [full] | 2194  | No  | NA    | 0  | 0  | Not-determined | Genome-fragment | NA | 18.37 | 0     |
| S8-final-viral-combined_k141_49467   | [full] | 9182  | No  | NA    | 0  | 5  | Low-quality    | Genome-fragment | NA | 5.82  | 0     |
| S8-final-viral-combined_k141_266166  | [full] | 1457  | No  | NA    | 0  | 1  | Not-determined | Genome-fragment | NA | 0     | 0     |
| S2-final-viral-combined_k141_211355  | [full] | 9193  | No  | NA    | 1  | 0  | Low-quality    | Genome-fragment | NA | 13.86 | 0     |
| S8-final-viral-combined_k141_185890  | [full] | 4186  | No  | NA    | 0  | 3  | Not-determined | Genome-fragment | NA | 0     | 0     |
| S11_k141_173181                      |        | 9195  | No  | NA    | 0  | 3  | Low-quality    | Genome-fragment | NA | 14.4  | 0     |
| S8-final-viral-combined_k141_24596   | [full] | 1277  | No  | NA    | 0  | 1  | Not-determined | Genome-fragment | NA | 7.56  | 0     |
| S1_k141_172749                       |        | 9198  | No  | NA    | 3  | 0  | Low-quality    | Genome-fragment | NA | 0     | 0     |
| S17-final-viral-combined_k141_84210  | [full] | 9203  | No  | NA    | 0  | 2  | Low-quality    | Genome-fragment | NA | 0     | 0     |
| S8-final-viral-combined_k141_29346   | [full] | 3844  | No  | NA    | 0  | 1  | Not-determined | Genome-fragment | NA | 23.86 | 0     |
| S8-final-viral-combined_k141_35908   | [full] | 13532 | No  | NA    | 0  | 2  | Not-determined | Genome-fragment | NA | 10.27 | 0     |
| S8-final-viral-combined_k141_266214  | [full] | 1780  | No  | NA    | 0  | 1  | Not-determined | Genome-fragment | NA | 11.19 | 0     |
| S8-final-viral-combined_k141_139965  | [full] | 2582  | No  | NA    | 0  | 4  | Not-determined | Genome-fragment | NA | 0     | 0     |
| S1_k141_266931                       |        | 9208  | No  | NA    | 3  | 0  | Low-quality    | Genome-fragment | NA | 0     | 0     |
| S8-final-viral-combined_k141_139968  | [full] | 2215  | No  | NA    | 0  | 0  | Not-determined | Genome-fragment | NA | 0     | 0     |
| S5-final-viral-combined_k141_73628   | [full] | 9212  | No  | NA    | 0  | 0  | Low-quality    | Genome-fragment | NA | 10.27 | 0     |
| S8-final-viral-combined_k141_266250  | [full] | 1285  | No  | NA    | 0  | 1  | Not-determined | Genome-fragment | NA | 11.19 | 0     |
| S17-final-viral-combined_k141_23584  | [full] | 9213  | No  | NA    | 1  | 0  | Low-quality    | Genome-fragment | NA | 1.47  | 0     |
| S8-final-viral-combined_k141_59395   | [full] | 1377  | No  | NA    | 0  | 0  | Not-determined | Genome-fragment | NA | 0     | 0     |
| S12_k141_23919                       |        | 9219  | No  | NA    | 1  | 0  | Low-quality    | Genome-fragment | NA | 1.47  | 0     |
| S8-final-viral-combined_k141_35928   | [full] | 2389  | No  | NA    | 0  | 3  | Not-determined | Genome-fragment | NA | 0     | 0     |
| S2-final-viral-combined_k141_163450  | [full] | 9219  | No  | NA    | 5  | 0  | Low-quality    | Genome-fragment | NA | 13.86 | 0     |
| S2-final-viral-combined_k141_89495   | [full] | 9222  | No  | NA    | 0  | 1  | Low-quality    | Genome-fragment | NA | 8.51  | 0     |
| S1_k141_83798                        |        | 9227  | No  | NA    | 0  | 1  | Low-quality    | Genome-fragment | NA | 12.98 | 0     |
| S8-final-viral-combined_k141_70878   | [full] | 2142  | No  | NA    | 0  | 1  | Not-determined | Genome-fragment | NA | 15.01 | 0     |
| S1_k141_20026                        |        | 9232  | No  | NA    | 8  | 0  | Low-quality    | Genome-fragment | NA | 21.73 | 0     |
| S17-final-viral-combined_k141_163902 | [full] | 9233  | No  | NA    | 5  | 0  | Low-quality    | Genome-fragment | NA | 18.91 | 0     |
| S7-final-viral-combined_k141_22661   | [full] | 9245  | No  | NA    | 1  | 4  | Low-quality    | Genome-fragment | NA | 0     | 0     |
| S8-final-viral-combined_k141_266285  | [full] | 1768  | No  | NA    | 0  | 1  | Not-determined | Genome-fragment | NA | 0     | 0     |
| S8-final-viral-combined_k141_197236  | [full] | 2885  | No  | NA    | 0  | 3  | Not-determined | Genome-fragment | NA | 0     | 0     |
| S8-final-viral-combined_k141_59469   | [full] | 1251  | No  | NA    | 0  | 3  | Not-determined | Genome-fragment | NA | 0     | 0     |
| S8-final-viral-combined_k141_82266   | [full] | 1385  | No  | NA    | 0  | 1  | Not-determined | Genome-fragment | NA | 8.67  | 0     |
| S3_k141_49311                        |        | 5247  | No  | NA    | 0  | 7  | Low-quality    | Genome-fragment | NA | 0     | 0     |
| S8-final-viral-combined_k141_1485    | [full] | 5132  | No  | NA    | 0  | 1  | Not-determined | Genome-fragment | NA | 0     | 0     |
| S8-final-viral-combined_k141_116647  | [full] | 2140  | No  | NA    | 0  | 1  | Not-determined | Genome-fragment | NA | 4.1   | 0     |
| S8-final-viral-combined_k141_12603   | [full] | 1632  | No  | NA    | 0  | 2  | Not-determined | Genome-fragment | NA | 0     | 0     |
| S5-final-viral-combined_k141_88696   | [full] | 9254  | No  | NA    | 0  | 8  | Low-quality    | Genome-fragment | NA | 100   | 2.79  |
| S8-final-viral-combined_k141_186014  | [full] | 1296  | No  | NA    | 0  | 0  | Not-determined | Genome-fragment | NA | 0     | 0     |
| S8-final-viral-combined_k141_140059  | [full] | 31825 | No  | NA    | 11 | 1  | High-quality   | High-quality    | NA | 1.00  | 0     |
| S8-final-viral-combined_k141_174450  | [full] | 3454  | No  | NA    | 0  | 0  | Not-determined | Genome-fragment | NA | 20.19 | 0     |
| S2-final-viral-combined_k141_36758   | [full] | 9257  | No  | NA    | 1  | 0  | Low-quality    | Genome-fragment | NA | 7.46  | 0     |
| S7-final-viral-combined_k141_69630   | [full] | 9258  | No  | NA    | 0  | 7  | Low-quality    | Genome-fragment | NA | 0     | 0     |
| S8-final-viral-combined_k141_105184  | [full] | 1851  | No  | NA    | 0  | 0  | Not-determined | Genome-fragment | NA | 0     | 0     |
| S8-final-viral-combined_k141_140097  | [full] | 2722  | No  | NA    | 0  | 1  | Not-determined | Genome-fragment | NA | 0     | 0     |
| S8-final-viral-combined_k141_128240  | [full] | 2246  | No  | NA    | 0  | 0  | Not-determined | Genome-fragment | NA | 0     | 0     |
| S8-final-viral-combined_k141_202189  | [full] | 1832  | No  | NA    | 0  | 0  | Not-determined | Genome-fragment | NA | 0     | 0     |
| S8-final-viral-combined_k141_59499   | [full] | 3241  | No  | NA    | 0  | 0  | Not-determined | Genome-fragment | NA | 0     | 0     |
| S8-final-viral-combined_k141_19501   | [full] | 1612  | No  | NA    | 0  | 1  | Not-determined | Genome-fragment | NA | 0     | 0     |
| S8-final-viral-combined_k141_105232  | [full] | 1089  | No  | NA    | 0  | 1  | Not-determined | Genome-fragment | NA | 5.66  | 0     |
| S9-final-viral-combined_k141_13284   | [full] | 9259  | No  | NA    | 0  | 0  | Low-quality    | Genome-fragment | NA | 0     | 0     |
| S8-final-viral-combined_k141_174518  | [full] | 3382  | No  | NA    | 0  | 1  | Not-determined | Genome-fragment | NA | 11.25 | 0     |
| S2-final-viral-combined_k141_206609  | [full] | 9259  | No  | NA    | 0  | 2  | Low-quality    | Genome-fragment | NA | 3.94  | 0     |
| S8-final-viral-combined_k141_193920  | [full] | 4198  | No  | NA    | 0  | 2  | Not-determined | Genome-fragment | NA | 14.5  | 0     |
| S6-final-viral-combined_k141_93006   | [full] | 9260  | No  | NA    | 1  | 0  | Low-quality    | Genome-fragment | NA | 100   | 0     |
| S8-final-viral-combined_k141_186054  | [full] | 9261  | No  | NA    | 1  | 0  | Low-quality    | Genome-fragment | NA | 9.66  | 0     |
| S8-final-viral-combined_k141_254757  | [full] | 52551 | Yes | 52057 | 25 | 4  | High-quality   | High-quality    | NA | 4.54  | 0     |
| S11-final-viral-combined_k141_110341 | [full] | 2923  | No  | NA    | 0  | 3  | Not-determined | Genome-fragment | NA | 22.87 | 0     |
| S8-final-viral-combined_k141_174574  | [full] | 9265  | No  | NA    | 0  | 7  | Low-quality    | Genome-fragment | NA | 0     | 0     |
| S8_k141_176383                       |        | 1478  | No  | NA    | 0  | 2  | Not-determined | Genome-fragment | NA | 0     | 0     |
| S5_k141_127132                       |        | 9265  | No  | NA    | 9  | 0  | Low-quality    | Genome-fragment | NA | 0     | 0     |
| S8-final-viral-combined_k141_151347  | [full] | 9268  | No  | NA    | 0  | 0  | Low-quality    | Genome-fragment | NA | 0     | 0     |
| S8-final-viral-combined_k141_1594    | [full] | 2179  | No  | NA    | 0  | 2  | Not-determined | Genome-fragment | NA | 0     | 0     |
| S8-final-viral-combined_k141_1596    | [full] | 1724  | No  | NA    | 0  | 1  | Not-determined | Genome-fragment | NA | 0     | 0     |
| S8-final-viral-combined_k141_140224  | [full] | 2228  | No  | NA    | 0  | 1  | Not-determined | Genome-fragment | NA | 0     | 0     |
| S8-final-viral-combined_k141_243167  | [full] | 4515  | No  | NA    | 0  | 2  | Not-determined | Genome-fragment | NA | 0     | 0     |
| S8-final-viral-combined_k141_151577  | [full] | 2431  | No  | NA    | 0  | 0  | Not-determined | Genome-fragment | NA | 0     | 0     |
| S8-final-viral-combined_k141_151577  | [full] | 3248  | No  | NA    | 0  | 2  | Not-determined | Genome-fragment | NA | 0     | 0     |
| S8-final-viral-combined_k141_19569   | [full] | 4848  | No  | NA    | 0  | 0  | Not-determined | Genome-fragment | NA | 0     | 0     |
| S7-final-viral-combined_k141_35521   | [full] | 9275  | Yes | 1401  | 1  | 3  | Low-quality    | Genome-fragment | NA | 33.67 | 84.89 |
| S4-final-viral-combined_k141_161822  | [full] | 9275  | No  | NA    | 0  | 0  | Low-quality    | Genome-fragment | NA | 1.38  | 0     |
| S8-final-viral-combined_k141_23561   | [full] | 9275  | No  | NA    | 0  | 3  | Low-quality    | Genome-fragment | NA | 4.04  | 0     |
| S8-final-viral-combined_k141_21988   | [full] | 9275  | No  | NA    | 2  | 0  | Low-quality    | Genome-fragment | NA | 22.29 | 0     |
| S8-final-viral-combined_k141_23973   | [full] | 8423  | No  | NA    | 0  | 2  | Not-determined | Genome-fragment | NA | 0     | 0     |



|                                      |        |       |     |      |    |                |                 |                 |       |       |
|--------------------------------------|--------|-------|-----|------|----|----------------|-----------------|-----------------|-------|-------|
| 56-final-viral-combined_k141_7181    | [Full] | 9378  | No  | NA   | 0  | 3              | Low-quality     | Genome-fragment | 6.18  | 0     |
| 511_k141_309285                      |        | 9379  | No  | NA   | 0  | 1              | Low-quality     | Genome-fragment | 8.68  | 0     |
| 58-final-viral-combined_k141_163104  | [Full] | 2999  | No  | NA   | 0  | 2              | Not-determined  | Genome-fragment | NA    | 0     |
| 51-final-viral-combined_k141_159695  | [Full] | 9379  | No  | NA   | 2  | 0              | Low-quality     | Genome-fragment | 15.15 | 0     |
| 52-final-viral-combined_k141_206256  | [Full] | 9381  | Yes | 3481 | 2  | 3              | Low-quality     | Genome-fragment | 7.27  | 62.89 |
| 512_k141_360070                      |        | 9385  | No  | NA   | 0  | 0              | Low-quality     | Genome-fragment | 6.99  | 0     |
| 58-final-viral-combined_k141_254940  | [Full] | 2234  | No  | NA   | 0  | 2              | Not-determined  | Genome-fragment | NA    | 0     |
| 58-final-viral-combined_k141_244043  | [Full] | 1333  | No  | NA   | 0  | 0              | Not-determined  | Genome-fragment | NA    | 0     |
| 56-final-viral-combined_k141_139161  | [Full] | 9386  | No  | NA   | 0  | 1              | Low-quality     | Genome-fragment | 11.07 | 0     |
| 58-final-viral-combined_k141_36335   | [Full] | 2787  | No  | NA   | 1  | 0              | Not-determined  | Genome-fragment | NA    | 0     |
| 56_k141_7842                         |        | 9386  | No  | NA   | 1  | 2              | Low-quality     | Genome-fragment | 5.09  | 0     |
| 58-final-viral-combined_k141_162899  | [Full] | 9389  | No  | NA   | 8  | 0              | Low-quality     | Genome-fragment | 28.95 | 0     |
| 58-final-viral-combined_k141_128584  | [Full] | 1778  | No  | NA   | 0  | 2              | Not-determined  | Genome-fragment | NA    | 0     |
| 51_k141_345605                       |        | 9390  | No  | NA   | 3  | 0              | Low-quality     | Genome-fragment | 23.28 | 0     |
| 58-final-viral-combined_k141_209441  | [Full] | 3211  | No  | NA   | 0  | 0              | Not-determined  | Genome-fragment | NA    | 0     |
| 55-final-viral-combined_k141_201657  | [Full] | 9396  | No  | NA   | 0  | 1              | Low-quality     | Genome-fragment | 12.34 | 0     |
| 51-final-viral-combined_k141_202188  | [Full] | 9403  | No  | NA   | 3  | 0              | Low-quality     | Genome-fragment | 16.32 | 0     |
| 511-final-viral-combined_k141_16244  | [Full] | 9410  | No  | NA   | 0  | 4              | Low-quality     | Genome-fragment | 6.4   | 0     |
| 58-final-viral-combined_k141_151862  | [Full] | 9429  | No  | NA   | 0  | 2              | Not-determined  | Genome-fragment | NA    | 0     |
| 512_k141_257209                      |        | 9414  | No  | NA   | 0  | 4              | Low-quality     | Genome-fragment | 3.57  | 0     |
| 58-final-viral-combined_k141_209458  | [Full] | 1811  | No  | NA   | 0  | 0              | Not-determined  | Genome-fragment | NA    | 0     |
| 517-final-viral-combined_k141_145131 | [Full] | 9421  | No  | NA   | 2  | 0              | Low-quality     | Genome-fragment | 23.84 | 0     |
| 57-final-viral-combined_k141_118634  | [Full] | 9436  | No  | NA   | 6  | 0              | Low-quality     | Genome-fragment | 25.99 | 0     |
| 56-final-viral-combined_k141_20462   | [Full] | 9438  | No  | NA   | 3  | 0              | Low-quality     | Genome-fragment | 13.49 | 0     |
| 58-final-viral-combined_k141_59803   | [Full] | 2112  | No  | NA   | 0  | 1              | Not-determined  | Genome-fragment | NA    | 0     |
| 58-final-viral-combined_k141_105614  | [Full] | 1646  | No  | NA   | 0  | 0              | Not-determined  | Genome-fragment | NA    | 0     |
| 58-final-viral-combined_k141_266704  | [Full] | 6348  | No  | NA   | 0  | 2              | Not-determined  | Genome-fragment | NA    | 0     |
| 58-final-viral-combined_k141_174941  | [Full] | 1322  | No  | NA   | 0  | 0              | Not-determined  | Genome-fragment | NA    | 0     |
| 511-final-viral-combined_k141_20845  | [Full] | 9442  | No  | NA   | 0  | 1              | Low-quality     | Genome-fragment | 5.44  | 0     |
| 58-final-viral-combined_k141_174948  | [Full] | 1067  | No  | NA   | 2  | 1              | Not-determined  | Genome-fragment | NA    | 0     |
| 58-final-viral-combined_k141_255001  | [Full] | 3599  | No  | NA   | 0  | 2              | Not-determined  | Genome-fragment | NA    | 0     |
| 55_k141_37972                        |        | 9446  | No  | NA   | 4  | 0              | Low-quality     | Genome-fragment | 10.44 | 0     |
| 58-final-viral-combined_k141_59817   | [Full] | 2029  | No  | NA   | 0  | 2              | Not-determined  | Genome-fragment | NA    | 0     |
| 58-final-viral-combined_k141_25303   | [Full] | 1035  | No  | NA   | 0  | 0              | Not-determined  | Genome-fragment | NA    | 0     |
| 58-final-viral-combined_k141_5983    | [Full] | 7368  | No  | NA   | 0  | 1              | Not-determined  | Genome-fragment | NA    | 0     |
| 58-final-viral-combined_k141_1170991 | [Full] | 7259  | No  | NA   | 0  | 1              | Not-determined  | Genome-fragment | NA    | 0     |
| 512-final-viral-combined_k141_323473 | [Full] | 9449  | No  | NA   | 0  | 1              | Low-quality     | Genome-fragment | 22.75 | 0     |
| 58-final-viral-combined_k141_47807   | [Full] | 2177  | No  | NA   | 0  | 1              | Not-determined  | Genome-fragment | NA    | 0     |
| 58-final-viral-combined_k141_151871  | [Full] | 2176  | No  | NA   | 0  | 3              | Not-determined  | Genome-fragment | NA    | 0     |
| 58-final-viral-combined_k141_175016  | [Full] | 2013  | No  | NA   | 0  | 1              | Not-determined  | Genome-fragment | NA    | 0     |
| 58-final-viral-combined_k141_59862   | [Full] | 4269  | No  | NA   | 0  | 5              | Not-determined  | Genome-fragment | NA    | 0     |
| 58-final-viral-combined_k141_197697  | [Full] | 2035  | No  | NA   | 0  | 0              | Not-determined  | Genome-fragment | NA    | 0     |
| 58-final-viral-combined_k141_232589  | [Full] | 1996  | No  | NA   | 0  | 1              | Not-determined  | Genome-fragment | NA    | 0     |
| 58-final-viral-combined_k141_163249  | [Full] | 3612  | No  | NA   | 0  | 3              | Not-determined  | Genome-fragment | NA    | 0     |
| 52-final-viral-combined_k141_171550  | [Full] | 9458  | No  | NA   | 0  | 6              | Low-quality     | Genome-fragment | 2.29  | 0     |
| 54_k141_155873                       |        | 9459  | Yes | 5218 | 0  | 1              | Low-quality     | Genome-fragment | 9.58  | 44.84 |
| 58-final-viral-combined_k141_94305   | [Full] | 1081  | No  | NA   | 0  | 1              | Not-determined  | Genome-fragment | NA    | 0     |
| 58-final-viral-combined_k141_47847   | [Full] | 2697  | No  | NA   | 0  | 5              | Not-determined  | Genome-fragment | NA    | 0     |
| 54-final-viral-combined_k141_120741  | [Full] | 9474  | No  | NA   | 0  | 1              | Low-quality     | Genome-fragment | 14.34 | 0     |
| 57-final-viral-combined_k141_168524  | [Full] | 9478  | No  | NA   | 0  | 1              | Low-quality     | Genome-fragment | 12.15 | 0     |
| 512_k141_94852                       |        | 9483  | No  | NA   | 0  | 6              | Low-quality     | Genome-fragment | 2.52  | 0     |
| 58-final-viral-combined_k141_22092   | [Full] | 9492  | No  | NA   | 0  | 6              | Low-quality     | Genome-fragment | 5.82  | 0     |
| 53-final-viral-combined_k141_137869  | [Full] | 9497  | No  | NA   | 1  | 0              | Low-quality     | Genome-fragment | 6.29  | 0     |
| 58-final-viral-combined_k141_240545  | [Full] | 9507  | No  | NA   | 2  | 0              | Low-quality     | Genome-fragment | 6.89  | 0     |
| 58-final-viral-combined_k141_25414   | [Full] | 2423  | No  | NA   | 0  | 2              | Not-determined  | Genome-fragment | NA    | 0     |
| 512-final-viral-combined_k141_381485 | [Full] | 9514  | Yes | 4332 | 2  | 1              | Low-quality     | Genome-fragment | 10.9  | 54.47 |
| 57-final-viral-combined_k141_51529   | [Full] | 9519  | No  | NA   | 0  | 2              | Low-quality     | Genome-fragment | 13.67 | 0     |
| 58-final-viral-combined_k141_197763  | [Full] | 1478  | No  | NA   | 0  | 2              | Not-determined  | Genome-fragment | NA    | 0     |
| 58-final-viral-combined_k141_220955  | [Full] | 4061  | No  | NA   | 0  | 0              | Not-determined  | Genome-fragment | NA    | 0     |
| 512-final-viral-combined_k141_84659  | [Full] | 9519  | No  | NA   | 1  | 0              | Low-quality     | Genome-fragment | 7.09  | 0     |
| 57-final-viral-combined_k141_219255  | [Full] | 9521  | No  | NA   | 0  | 5              | Low-quality     | Genome-fragment | 10.22 | 0     |
| 54_k141_42890                        |        | 9522  | No  | NA   | 0  | 6              | Low-quality     | Genome-fragment | 9.33  | 0     |
| 512_k141_221321                      |        | 9529  | No  | NA   | 3  | 0              | Low-quality     | Genome-fragment | 14.24 | 0     |
| 52-final-viral-combined_k141_155615  | [Full] | 9546  | No  | NA   | 2  | 2              | Low-quality     | Genome-fragment | 9.5   | 0     |
| 59-final-viral-combined_k141_72458   | [Full] | 9548  | No  | NA   | 8  | 0              | Low-quality     | Genome-fragment | 23.55 | 0     |
| 58_k141_249323                       |        | 9554  | No  | NA   | 1  | 1              | Low-quality     | Genome-fragment | 14.09 | 0     |
| 58-final-viral-combined_k141_94367   | [Full] | 2260  | No  | NA   | 0  | 1              | Not-determined  | Genome-fragment | NA    | 0     |
| 512_k141_225972                      |        | 9557  | No  | NA   | 2  | 0              | Low-quality     | Genome-fragment | 9.47  | 0     |
| 58-final-viral-combined_k141_186540  | [Full] | 1313  | No  | NA   | 0  | 1              | Not-determined  | Genome-fragment | NA    | 0     |
| 58-final-viral-combined_k141_266856  | [Full] | 6420  | No  | NA   | 0  | 0              | Not-determined  | Genome-fragment | NA    | 0     |
| 512-final-viral-combined_k141_38581  | [Full] | 9558  | No  | NA   | 1  | 2              | Low-quality     | Genome-fragment | 16.92 | 0     |
| 58-final-viral-combined_k141_105731  | [Full] | 3348  | No  | NA   | 0  | 3              | Not-determined  | Genome-fragment | NA    | 0     |
| 55-final-viral-combined_k141_52560   | [Full] | 9561  | No  | NA   | 4  | 0              | Low-quality     | Genome-fragment | 25.06 | 0     |
| 58-final-viral-combined_k141_255164  | [Full] | 2443  | No  | NA   | 0  | 1              | Not-determined  | Genome-fragment | NA    | 0     |
| 58-final-viral-combined_k141_197804  | [Full] | 2141  | No  | NA   | 0  | 0              | Not-determined  | Genome-fragment | NA    | 0     |
| 58-final-viral-combined_k141_209555  | [Full] | 6309  | No  | NA   | 0  | 2              | Not-determined  | Genome-fragment | NA    | 0     |
| 52_k141_176190                       |        | 9578  | No  | NA   | 6  | 0              | Low-quality     | Genome-fragment | 21.22 | 0     |
| 58-final-viral-combined_k141_243275  | [Full] | 1483  | No  | NA   | 0  | 0              | Not-determined  | Genome-fragment | NA    | 0     |
| 58-final-viral-combined_k141_209465  | [Full] | 7592  | No  | NA   | 7  | Not-determined | Genome-fragment | NA              | 0     |       |
| 58-final-viral-combined_k141_220705  | [Full] | 4181  | No  | NA   | 0  | 6              | Not-determined  | Genome-fragment | NA    | 0     |
| 512-final-viral-combined_k141_343440 | [Full] | 9587  | No  | NA   | 9  | 0              | Low-quality     | Genome-fragment | 15.79 | 0     |
| 512_k141_387291                      |        | 9597  | No  | NA   | 1  | 1              | Low-quality     | Genome-fragment | 4.13  | 0     |
| 51-final-viral-combined_k141_235947  | [Full] | 9599  | No  | NA   | 0  | 3              | Low-quality     | Genome-fragment | 3.67  | 0     |
| 512-final-viral-combined_k141_256457 | [Full] | 9604  | No  | NA   | 1  | 0              | Low-quality     | Genome-fragment | 3.88  | 0     |
| 512-final-viral-combined_k141_38289  | [Full] | 9606  | Yes | 6764 | 0  | 4              | Low-quality     | Genome-fragment | 9.85  | 29.59 |
| 58-final-viral-combined_k141_71674   | [Full] | 3676  | No  | NA   | 0  | 0              | Not-determined  | Genome-fragment | NA    | 0     |
| 58-final-viral-combined_k141_186614  | [Full] | 1928  | No  | NA   | 0  | 0              | Not-determined  | Genome-fragment | NA    | 0     |
| 512_k141_226861                      |        | 9611  | No  | NA   | 3  | 1              | Low-quality     | Genome-fragment | 15.71 | 0     |
| 58-final-viral-combined_k141_209621  | [Full] | 3309  | No  | NA   | 0  | 1              | Not-determined  | Genome-fragment | NA    | 0     |
| 517-k141_101205                      |        | 9612  | No  | NA   | 0  | 0              | Low-quality     | Genome-fragment | 17.76 | 0     |
| 58-final-viral-combined_k141_71686   | [Full] | 1906  | No  | NA   | 0  | 0              | Not-determined  | Genome-fragment | NA    | 0     |
| 58-final-viral-combined_k141_82781   | [Full] | 5312  | No  | NA   | 0  | 6              | Not-determined  | Genome-fragment | NA    | 0     |
| 52_k141_109942                       |        | 9612  | No  | NA   | 0  | 3              | Low-quality     | Genome-fragment | 13.01 | 0     |
| 58-final-viral-combined_k141_209630  | [Full] | 2258  | No  | NA   | 0  | 1              | Not-determined  | Genome-fragment | NA    | 0     |
| 58-final-viral-combined_k141_232766  | [Full] | 1941  | No  | NA   | 0  | 1              | Not-determined  | Genome-fragment | NA    | 0     |
| 58-final-viral-combined_k141_209631  | [Full] | 4046  | No  | NA   | 0  | 1              | Not-determined  | Genome-fragment | NA    | 0     |
| 58_k141_177518                       |        | 9612  | No  | NA   | 2  | 0              | Low-quality     | Genome-fragment | 28.08 | 0     |
| 58-final-viral-combined_k141_232809  | [Full] | 1914  | No  | NA   | 0  | 0              | Not-determined  | Genome-fragment | NA    | 0     |
| 52-final-viral-combined_k141_181852  | [Full] | 9613  | Yes | 1801 | 0  | 4              | Low-quality     | Genome-fragment | 0.53  | 81.26 |
| 55_k141_51234                        |        | 9615  | No  | NA   | 0  | 7              | Low-quality     | Genome-fragment | 4.74  | 0     |
| 58-final-viral-combined_k141_255215  | [Full] | 2042  | No  | NA   | 0  | 2              | Not-determined  | Genome-fragment | NA    | 0     |
| 517-final-viral-combined_k141_211329 | [Full] | 9619  | No  | NA   | 0  | 1              | Low-quality     | Genome-fragment | 15.7  | 0     |
| 58-final-viral-combined_k141_1980    | [Full] | 1251  | No  | NA   | 0  | 1              | Not-determined  | Genome-fragment | NA    | 0     |
| 58-final-viral-combined_k141_36583   | [Full] | 2200  | No  | NA   | 0  | 2              | Not-determined  | Genome-fragment | NA    | 0     |
| 54_k141_235871                       |        | 9625  | No  | NA   | 3  | 1              | Low-quality     | Genome-fragment | 17.03 | 0     |
| 57-final-viral-combined_k141_234311  | [Full] | 9628  | No  | NA   | 4  | 0              | Low-quality     | Genome-fragment | 20.76 | 0     |
| 55-final-viral-combined_k141_172978  | [Full] | 9633  | No  | NA   | 1  | 0              | Low-quality     | Genome-fragment | 5.73  | 0     |
| 512-final-viral-combined_k141_218079 | [Full] | 9639  | No  | NA   | 4  | 0              | Low-quality     | Genome-fragment | 21.16 | 0     |
| 517-final-viral-combined_k141_74446  | [Full] | 9640  | No  | NA   | 5  | 0              | Low-quality     | Genome-fragment | 23.14 | 0     |
| 58-final-viral-combined_k141_92542   | [Full] | 9649  | No  | NA   | 1  | 4              | Low-quality     | Genome-fragment | 21.76 | 0     |
| 58-final-viral-combined_k141_94534   | [Full] | 2027  | No  | NA   | 0  | 0              | Not-determined  | Genome-fragment | NA    | 0     |
| 58-final-viral-combined_k141_60071   | [Full] | 1675  | No  | NA   | 0  | 1              | Not-determined  | Genome-fragment | NA    | 0     |
| 58-final-viral-combined_k141_117281  | [Full] | 27542 | No  | NA   | 13 | 0              | Medium-quality  | Genome-fragment | 57.51 | 0     |
| 58-final-viral-combined_k141_244465  | [Full] | 2756  | No  | NA   | 0  | 2              | Not-determined  | Genome-fragment | NA    | 0     |
| 57-final-viral-combined_k141_64054   | [Full] | 9656  | No  | NA   | 0  | 6              | Low-quality     | Genome-fragment | 7.83  | 0     |
| 58-final-viral-combined_k141_220802  | [Full] | 1565  | No  | NA   | 0  | 1              | Not-determined  | Genome-fragment | NA    | 0     |
| 58-final-viral-combined_k141_152142  | [Full] | 1044  | No  | NA   | 0  | 0              | Not-determined  | Genome-fragment | NA    | 0     |
| 58-final-viral-combined_k141_127878  | [Full] | 1478  | No  | NA   | 0  | 0              | Not-determined  | Genome-fragment | NA    | 0     |
| 58_k141_155816                       |        | 9660  | No  | NA   | 3  | 0              | Low-quality     | Genome-fragment | 17.28 | 0     |
| 511-final-viral-combined_k141_22783  | [Full] | 9665  | No  | NA   | 6  | 0              | Low-quality     | Genome-fragment | 20.15 | 0     |
| 58-final-viral-combined_k141_94566   | [Full] | 6032  | No  | NA   | 0  | 4              | Not-determined  | Genome-fragment | NA    | 0     |
| 57_k141_196033                       |        | 9669  | No  | NA   | 0  | 1              | Low-quality     | Genome-fragment | 4.95  | 0     |
| 58-final-viral-combined_k141_105838  | [Full] | 2405  | No  | NA   | 0  | 1              | Not-determined  | Genome-fragment | NA    | 0     |
| 58-final-viral-combined_k141_25607   | [Full] | 42754 | No  | NA   | 7  | 0              | High-quality    | High-quality    | 96.36 | 0     |
| 52-final-viral-combined_k141_129551  | [Full] | 9676  | No  | NA   | 0  | 2              | Low-quality     | Genome-fragment | 20.2  | 0     |
| 52-final-viral-combined_k141_239811  | [Full] | 9678  | No  | NA   | 0  | 2              | Low-quality     | Genome-fragment | 12.48 | 0     |
| 58-final-viral-combined_k141_140825  | [Full] | 2221  | No  | NA   | 0  | 2              | Not-determined  | Genome-fragment | NA    | 0     |
| 58-final-viral-combined_k141_60128   | [Full] | 3389  | No  | NA   | 0  | 2              | Not-determined  | Genome-fragment | NA    | 0     |
| 58-final-viral-combined_k141_685     | [Full] | 9680  | No  | NA   | 2  | 0              |                 |                 |       |       |



|                                        |           |       |     |       |    |    |                |                 |       |       |
|----------------------------------------|-----------|-------|-----|-------|----|----|----------------|-----------------|-------|-------|
| S6-final-viral-combined_k141_120988]]  | full      | 9831  | No  | NA    | 1  | 4  | Low-quality    | Genome-fragment | 4.53  | 0     |
| S1-final-viral-combined_k141_13775]]   | full      | 9842  | No  | NA    | 3  | 0  | Low-quality    | Genome-fragment | 30.93 | 0     |
| S8-final-viral-combined_k141_209525]]  | full      | 4162  | No  | NA    | 0  | 1  | Not-determined | Genome-fragment | NA    | 0     |
| S1-final-viral-combined_k141_380771]]  | full      | 9843  | No  | NA    | 5  | 0  | Low-quality    | Genome-fragment | 13.61 | 0     |
| S9_k141_10113                          |           | 9869  | No  | NA    | 1  | 4  | Low-quality    | Genome-fragment | 22.84 | 0     |
| S8-final-viral-combined_k141_186851]]  | full      | 3073  | No  | NA    | 0  | 2  | Not-determined | Genome-fragment | NA    | 0     |
| S8-final-viral-combined_k141_36912]]   | full      | 2497  | No  | NA    | 0  | 2  | Not-determined | Genome-fragment | NA    | 0     |
| S11_k141_210341                        |           | 9869  | No  | NA    | 1  | 1  | Low-quality    | Genome-fragment | 5.24  | 0     |
| S8-final-viral-combined_k141_71938]]   | full      | 2810  | No  | NA    | 0  | 2  | Not-determined | Genome-fragment | NA    | 0     |
| S2-final-viral-combined_k141_45767]]   | full      | 9872  | No  | NA    | 1  | 0  | Low-quality    | Genome-fragment | 19.16 | 0     |
| S8-final-viral-combined_k141_48341]]   | full      | 1441  | No  | NA    | 0  | 1  | Not-determined | Genome-fragment | NA    | 0     |
| S8-final-viral-combined_k141_152425]]  | full      | 6784  | No  | NA    | 0  | 5  | Not-determined | Genome-fragment | NA    | 0     |
| S12-final-viral-combined_k141_351811]] | full      | 9875  | Yes | 3637  | 1  | 3  | Low-quality    | Genome-fragment | 5.18  | 63.17 |
| S11-final-viral-combined_k141_4908]]   | full      | 9876  | No  | NA    | 0  | 3  | Low-quality    | Genome-fragment | 4.27  | 0     |
| S11_k141_256624                        |           | 9882  | No  | NA    | 1  | 8  | Low-quality    | Genome-fragment | 6.65  | 0     |
| S8-final-viral-combined_k141_163717]]  | full      | 1564  | No  | NA    | 0  | 0  | Not-determined | Genome-fragment | NA    | 0     |
| S8-final-viral-combined_k141_2290]]    | full      | 1265  | No  | NA    | 0  | 2  | Not-determined | Genome-fragment | NA    | 0     |
| S8-final-viral-combined_k141_94823]]   | full      | 4761  | No  | NA    | 0  | 3  | Not-determined | Genome-fragment | NA    | 0     |
| S2-final-viral-combined_k141_2070]]    | full      | 9891  | No  | NA    | 0  | 0  | Low-quality    | Genome-fragment | 24.26 | 0     |
| S8-final-viral-combined_k141_244768]]  | full      | 1264  | No  | NA    | 0  | 2  | Not-determined | Genome-fragment | NA    | 0     |
| S1_k141_356369                         |           | 9897  | No  | NA    | 2  | 1  | Low-quality    | Genome-fragment | 25.52 | 0     |
| S8-final-viral-combined_k141_221097]]  | full      | 3842  | No  | NA    | 0  | 4  | Not-determined | Genome-fragment | NA    | 0     |
| S7_k141_58293                          |           | 9904  | No  | NA    | 0  | 6  | Low-quality    | Genome-fragment | 1.49  | 0     |
| S1-final-viral-combined_k141_199643]]  | full      | 9908  | No  | NA    | 4  | 0  | Low-quality    | Genome-fragment | 22.34 | 0     |
| S8-final-viral-combined_k141_94868]]   | full      | 3390  | No  | NA    | 0  | 3  | Not-determined | Genome-fragment | NA    | 0     |
| S8-final-viral-combined_k141_48385]]   | full      | 1580  | No  | NA    | 0  | 2  | Not-determined | Genome-fragment | NA    | 0     |
| S8-final-viral-combined_k141_129143]]  | full      | 1653  | No  | NA    | 0  | 1  | Not-determined | Genome-fragment | NA    | 0     |
| S8-final-viral-combined_k141_163769]]  | full      | 2560  | No  | NA    | 0  | 1  | Not-determined | Genome-fragment | NA    | 0     |
| S8-final-viral-combined_k141_186952]]  | full      | 6505  | No  | NA    | 0  | 2  | Not-determined | Genome-fragment | NA    | 0     |
| S1_k141_102320                         |           | 9908  | No  | NA    | 5  | 0  | Low-quality    | Genome-fragment | 24.16 | 0     |
| S17-final-viral-combined_k141_144277]] | full      | 9908  | No  | NA    | 3  | 0  | Low-quality    | Genome-fragment | 15.1  | 0     |
| S8-final-viral-combined_k141_233149]]  | full      | 1466  | No  | NA    | 0  | 2  | Not-determined | Genome-fragment | NA    | 0     |
| S8-final-viral-combined_k141_175617]]  | full      | 4323  | No  | NA    | 0  | 0  | Not-determined | Genome-fragment | NA    | 0     |
| S12-final-viral-combined_k141_134721]] | full      | 9908  | No  | NA    | 5  | 1  | Low-quality    | Genome-fragment | 27.46 | 0     |
| S8-final-viral-combined_k141_1282]]    | full      | 1411  | No  | NA    | 0  | 1  | Not-determined | Genome-fragment | NA    | 0     |
| S7-final-viral-combined_k141_3090]]    | full      | 9915  | No  | NA    | 0  | 1  | Low-quality    | Genome-fragment | 22.09 | 0     |
| S7_k141_11012                          |           | 9915  | Yes | 6554  | 1  | 1  | Low-quality    | Genome-fragment | 11    | 33.9  |
| S8-final-viral-combined_k141_244832]]  | full      | 1013  | No  | NA    | 0  | 0  | Not-determined | Genome-fragment | NA    | 0     |
| S8-final-viral-combined_k141_152149]]  | full      | 1148  | No  | NA    | 0  | 1  | Not-determined | Genome-fragment | NA    | 0     |
| S8-final-viral-combined_k141_105953]]  | full      | 2891  | No  | NA    | 0  | 2  | Not-determined | Genome-fragment | NA    | 0     |
| S12-final-viral-combined_k141_79062]]  | full      | 9922  | No  | NA    | 1  | 0  | Low-quality    | Genome-fragment | 11.14 | 0     |
| S2-final-viral-combined_k141_237407]]  | full      | 9926  | No  | NA    | 0  | 0  | Low-quality    | Genome-fragment | 23.32 | 0     |
| S5-final-viral-combined_k141_112046]]  | full      | 9933  | No  | NA    | 2  | 0  | Low-quality    | Genome-fragment | 25.74 | 0     |
| S8-final-viral-combined_k141_198327]]  | full      | 4319  | No  | NA    | 0  | 0  | Not-determined | Genome-fragment | NA    | 0     |
| S8-final-viral-combined_k141_267314]]  | full      | 2420  | No  | NA    | 0  | 1  | Not-determined | Genome-fragment | NA    | 0     |
| S2_k141_189443                         |           | 9933  | No  | NA    | 0  | 1  | Low-quality    | Genome-fragment | 6.73  | 0     |
| S8-final-viral-combined_k141_141241]]  | full      | 2069  | No  | NA    | 0  | 1  | Not-determined | Genome-fragment | NA    | 0     |
| S8-final-viral-combined_k141_267339]]  | full      | 1061  | No  | NA    | 0  | 0  | Not-determined | Genome-fragment | NA    | 0     |
| S7-final-viral-combined_k141_232491]]  | full      | 9938  | No  | NA    | 0  | 1  | Low-quality    | Genome-fragment | 4.04  | 0     |
| S8-final-viral-combined_k141_267360]]  | full      | 4532  | No  | NA    | 0  | 3  | Not-determined | Genome-fragment | NA    | 0     |
| S8-final-viral-combined_k141_152619]]  | full      | 2641  | No  | NA    | 0  | 3  | Not-determined | Genome-fragment | NA    | 0     |
| S8-final-viral-combined_k141_129264]]  | full      | 1025  | No  | NA    | 0  | 0  | Not-determined | Genome-fragment | NA    | 0     |
| S8-final-viral-combined_k141_72197]]   | full      | 1737  | No  | NA    | 0  | 1  | Not-determined | Genome-fragment | NA    | 0     |
| S8-final-viral-combined_k141_13381]]   | full      | 5864  | No  | NA    | 0  | 2  | Not-determined | Genome-fragment | NA    | 0     |
| S12-final-viral-combined_k141_274051]] | full      | 9943  | No  | NA    | 2  | 0  | Low-quality    | Genome-fragment | 11.9  | 0     |
| S17-final-viral-combined_k141_76772]]  | full      | 9949  | No  | NA    | 0  | 2  | Low-quality    | Genome-fragment | 22.51 | 0     |
| S8-final-viral-combined_k141_198381]]  | full      | 1466  | No  | NA    | 0  | 1  | Not-determined | Genome-fragment | NA    | 0     |
| S17-final-viral-combined_k141_133816]] | full      | 9951  | No  | NA    | 0  | 5  | Low-quality    | Genome-fragment | 7.42  | 0     |
| S8-final-viral-combined_k141_72219]]   | full      | 1583  | No  | NA    | 0  | 1  | Not-determined | Genome-fragment | NA    | 0     |
| S8-final-viral-combined_k141_129285]]  | full      | 9953  | No  | NA    | 0  | 12 | Not-determined | Genome-fragment | NA    | 0     |
| S8-final-viral-combined_k141_175764]]  | full      | 4203  | No  | NA    | 0  | 2  | Not-determined | Genome-fragment | NA    | 0     |
| S8-final-viral-combined_k141_233371]]  | full      | 9900  | No  | NA    | 0  | 5  | Not-determined | Genome-fragment | NA    | 0     |
| S8-final-viral-combined_k141_175786]]  | full      | 3467  | No  | NA    | 0  | 1  | Not-determined | Genome-fragment | NA    | 0     |
| S8-final-viral-combined_k141_141331]]  | full      | 1339  | No  | NA    | 0  | 1  | Not-determined | Genome-fragment | NA    | 0     |
| S11-final-viral-combined_k141_18931]]  | full      | 9956  | No  | NA    | 2  | 2  | Low-quality    | Genome-fragment | 7.51  | 0     |
| S12-final-viral-combined_k141_327196]] | full      | 9968  | No  | NA    | 4  | 0  | Low-quality    | Genome-fragment | 20.92 | 0     |
| S8-final-viral-combined_k141_26019]]   | full      | 1344  | No  | NA    | 0  | 1  | Not-determined | Genome-fragment | NA    | 0     |
| S7-final-viral-combined_k141_147109]]  | full      | 9976  | No  | NA    | 8  | 0  | Low-quality    | Genome-fragment | 28.48 | 0     |
| S8-final-viral-combined_k141_260204]]  | full      | 1066  | No  | NA    | 1  | 1  | Not-determined | Genome-fragment | NA    | 0     |
| S5-final-viral-combined_k141_85321]]   | full      | 9979  | Yes | 1877  | 3  | 6  | Low-quality    | Genome-fragment | 3.77  | 81.19 |
| S4-final-viral-combined_k141_14721]]   | full      | 9984  | No  | NA    | 0  | 6  | Low-quality    | Genome-fragment | 1.56  | 0     |
| S5-final-viral-combined_k141_156180]]  | full      | 9990  | No  | NA    | 0  | 0  | Low-quality    | Genome-fragment | 26.7  | 0     |
| S11-final-viral-combined_k141_28286]]  | full      | 9994  | No  | NA    | 4  | 1  | Low-quality    | Genome-fragment | 25.68 | 0     |
| S8-final-viral-combined_k141_244992]]  | full      | 1694  | No  | NA    | 0  | 1  | Not-determined | Genome-fragment | NA    | 0     |
| S8-final-viral-combined_k141_141317]]  | full      | 5086  | No  | NA    | 0  | 0  | Not-determined | Genome-fragment | NA    | 0     |
| S8-final-viral-combined_k141_175868]]  | full      | 1580  | No  | NA    | 0  | 1  | Not-determined | Genome-fragment | NA    | 0     |
| S8-final-viral-combined_k141_55140]]   | full      | 9995  | No  | NA    | 12 | 0  | Low-quality    | Genome-fragment | 16.2  | 0     |
| S8-final-viral-combined_k141_141364]]  | full      | 2587  | No  | NA    | 0  | 3  | Not-determined | Genome-fragment | NA    | 0     |
| S8-final-viral-combined_k141_37208]]   | full      | 2487  | No  | NA    | 0  | 2  | Not-determined | Genome-fragment | NA    | 0     |
| S1_k141_195193                         |           | 9996  | No  | NA    | 0  | 4  | Low-quality    | Genome-fragment | 3.72  | 0     |
| S8-final-viral-combined_k141_50744]]   | full      | 10008 | Yes | 6461  | 2  | 2  | Low-quality    | Genome-fragment | 10.65 | 35.44 |
| S8-final-viral-combined_k141_221011]]  | full      | 4421  | No  | NA    | 0  | 1  | Not-determined | Genome-fragment | NA    | 0     |
| S8-final-viral-combined_k141_255744]]  | full      | 1622  | No  | NA    | 0  | 1  | Not-determined | Genome-fragment | NA    | 0     |
| S8-final-viral-combined_k141_37221]]   | full      | 3253  | No  | NA    | 0  | 2  | Not-determined | Genome-fragment | NA    | 0     |
| S8-final-viral-combined_k141_210240]]  | full      | 2644  | No  | NA    | 0  | 2  | Not-determined | Genome-fragment | NA    | 0     |
| S8-final-viral-combined_k141_267504]]  | full      | 1074  | No  | NA    | 0  | 0  | Not-determined | Genome-fragment | NA    | 0     |
| S8-final-viral-combined_k141_106104]]  | full      | 2967  | No  | NA    | 0  | 1  | Not-determined | Genome-fragment | NA    | 0     |
| S17_k141_182681                        |           | 10011 | No  | NA    | 4  | 1  | Low-quality    | Genome-fragment | 15.49 | 0     |
| S8-final-viral-combined_k141_13522]]   | full      | 3315  | No  | NA    | 0  | 2  | Not-determined | Genome-fragment | NA    | 0     |
| S8-final-viral-combined_k141_106119]]  | full      | 4623  | No  | NA    | 0  | 5  | Not-determined | Genome-fragment | NA    | 0     |
| S8-final-viral-combined_k141_216894]]  | 0_partial | 10015 | No  | NA    | 1  | 2  | Low-quality    | Genome-fragment | 16.06 | 0     |
| S5-final-viral-combined_k141_17709]]   | full      | 10012 | No  | NA    | 1  | 1  | Low-quality    | Genome-fragment | 3.58  | 0     |
| S8-final-viral-combined_k141_117707]]  | full      | 1897  | No  | NA    | 0  | 0  | Not-determined | Genome-fragment | NA    | 0     |
| S8-final-viral-combined_k141_117709]]  | full      | 2438  | No  | NA    | 0  | 2  | Not-determined | Genome-fragment | NA    | 0     |
| S12-final-viral-combined_k141_34241]]  | 0_partial | 10023 | Yes | 1625  | 0  | 4  | Low-quality    | Genome-fragment | 1.65  | 83.8  |
| S8-final-viral-combined_k141_152775]]  | full      | 1181  | No  | NA    | 0  | 1  | Not-determined | Genome-fragment | NA    | 0     |
| S8-final-viral-combined_k141_13568]]   | full      | 2631  | No  | NA    | 0  | 2  | Not-determined | Genome-fragment | NA    | 0     |
| S8-final-viral-combined_k141_175974]]  | full      | 3106  | No  | NA    | 0  | 0  | Not-determined | Genome-fragment | NA    | 0     |
| S8-final-viral-combined_k141_233432]]  | full      | 1158  | No  | NA    | 0  | 0  | Not-determined | Genome-fragment | NA    | 0     |
| S8-final-viral-combined_k141_255774]]  | full      | 3360  | No  | NA    | 0  | 2  | Not-determined | Genome-fragment | NA    | 0     |
| S2-final-viral-combined_k141_89508]]   | full      | 10015 | No  | NA    | 4  | 1  | Low-quality    | Genome-fragment | 24.06 | 0     |
| S8-final-viral-combined_k141_109591]]  | full      | 10017 | No  | NA    | 0  | 1  | Low-quality    | Genome-fragment | NA    | 0     |
| S8-final-viral-combined_k141_106161]]  | full      | 2690  | No  | NA    | 0  | 2  | Not-determined | Genome-fragment | NA    | 0     |
| S5-final-viral-combined_k141_80044]]   | full      | 10038 | No  | NA    | 0  | 1  | Low-quality    | Genome-fragment | 12.16 | 0     |
| S8-final-viral-combined_k141_221271]]  | full      | 2677  | No  | NA    | 0  | 2  | Not-determined | Genome-fragment | NA    | 0     |
| S8-final-viral-combined_k141_210200]]  | full      | 2536  | No  | NA    | 0  | 0  | Not-determined | Genome-fragment | NA    | 0     |
| S1-final-viral-combined_k141_59807]]   | full      | 10040 | Yes | 6659  | 6  | 3  | Low-quality    | Genome-fragment | 17.87 | 33.68 |
| S8-final-viral-combined_k141_176026]]  | full      | 3375  | No  | NA    | 0  | 2  | Not-determined | Genome-fragment | NA    | 0     |
| S2_k141_23804                          |           | 10051 | No  | NA    | 0  | 1  | Low-quality    | Genome-fragment | 13.69 | 0     |
| S17-final-viral-combined_k141_248634]] | full      | 10057 | No  | NA    | 3  | 0  | Low-quality    | Genome-fragment | 24.62 | 0     |
| S8-final-viral-combined_k141_184511]]  | full      | 10068 | No  | NA    | 4  | 1  | Low-quality    | Genome-fragment | 21.51 | 0     |
| S8-final-viral-combined_k141_16087]]   | full      | 7330  | Yes | 47543 | 17 | 15 | High-quality   | Genome-fragment | 100   | 31.22 |
| S4-final-viral-combined_k141_49713]]   | full      | 10070 | No  | NA    | 0  | 1  | Low-quality    | Genome-fragment | 13.41 | 0     |
| S11_k141_153539                        |           | 10076 | No  | NA    | 7  | 0  | Low-quality    | Genome-fragment | 22.36 | 0     |
| S8-final-viral-combined_k141_23529]]   | full      | 2179  | No  | NA    | 0  | 1  | Not-determined | Genome-fragment | NA    | 0     |
| S8-final-viral-combined_k141_141535]]  | full      | 2245  | No  | NA    | 0  | 0  | Not-determined | Genome-fragment | NA    | 0     |
| S8-final-viral-combined_k141_221310]]  | full      | 2913  | No  | NA    | 0  | 0  | Not-determined | Genome-fragment | NA    | 0     |
| S11-final-viral-combined_k141_140846]] | full      | 10086 | No  | NA    | 5  | 0  | Low-quality    | Genome-fragment | 21.23 | 0     |
| S8-final-viral-combined_k141_129565]]  | full      | 2647  | No  | NA    | 0  | 1  | Not-determined | Genome-fragment | NA    | 0     |
| S8-final-viral-combined_k141_267673]]  | full      | 1030  | No  | NA    | 0  | 1  | Not-determined | Genome-fragment | NA    | 0     |
| S7-final-viral-combined_k141_23453]]   | full      | 10087 | No  | NA    | 5  | 0  | Low-quality    | Genome-fragment | 13.11 | 0     |
| S1-final-viral-combined_k141_389300]]  | full      | 10051 | No  | NA    | 0  | 1  | Low-quality    | Genome-fragment | NA    | 0     |
| S17-final-viral-combined_k141_136786]] | full      | 10094 | No  | NA    | 7  | 0  | Low-quality    | Genome-fragment | 25.44 | 0     |
| S8-final-viral-combined_k141_163928]]  | full      | 2424  | No  | NA    | 0  | 3  | Not-determined | Genome-fragment | NA    | 0     |
| S2-final-viral-combined_k141_241219]]  | full      | 10121 | No  | NA    | 0  | 1  | Low-quality    | Genome-fragment | NA    | 0     |
| S8-final-viral-combined_k141_26189]]   | full      | 6545  | No  | NA    | 0  | 4  | Not-determined | Genome-fragment | 10.17 | 0     |
| S8-final-viral-combined_k141_221376]]  | full      | 5099  | No  | NA    | 0  | 2  | Not-determined | Genome-fragment | NA    | 0     |
| S8-final-viral-combined_k141_255956]]  | full      | 2712  | No  | NA    | 0  | 3  | Not-determined | Genome-fragment | NA    |       |



|                                      |             |       |     |       |    |   |                |                 |                 |       |   |
|--------------------------------------|-------------|-------|-----|-------|----|---|----------------|-----------------|-----------------|-------|---|
| S1-final-viral-combined_k141_210843  | [full]      | 10230 | No  | NA    | 7  | 0 | Low-quality    | Genome-fragment | 29.27           | 0     |   |
| S8-final-viral-combined_k141_13752   | [full]      | 2216  | No  | NA    | 6  | 0 | Not-determined | Genome-fragment | NA              | 0     |   |
| S8-final-viral-combined_k141_221601  | [full]      | 2361  | No  | NA    | 0  | 1 | Not-determined | Genome-fragment | NA              | 0     |   |
| S11-final-viral-combined_k141_100009 | [full]      | 10234 | No  | NA    | 0  | 5 | Low-quality    | Genome-fragment | 9.36            | 0     |   |
| S17_k141_40213                       |             | 10235 | No  | NA    | 5  | 0 | Low-quality    | Genome-fragment | 14.1            | 0     |   |
| S8-final-viral-combined_k141_118063  | [full]      | 2216  | No  | NA    | 0  | 1 | Not-determined | Genome-fragment | NA              | 0     |   |
| S2_k141_146888                       |             | 10238 | No  | NA    | 4  | 0 | Low-quality    | Genome-fragment | 25.84           | 0     |   |
| S8-final-viral-combined_k141_128845  | [full]      | 2394  | No  | NA    | 0  | 0 | Not-determined | Genome-fragment | NA              | 0     |   |
| S8-final-viral-combined_k141_233841  | [full]      | 1804  | No  | NA    | 0  | 1 | Not-determined | Genome-fragment | NA              | 0     |   |
| S8-final-viral-combined_k141_95555   | [full]      | 3294  | No  | NA    | 0  | 2 | Not-determined | Genome-fragment | NA              | 0     |   |
| S8-final-viral-combined_k141_83235   | [full]      | 2425  | No  | NA    | 0  | 0 | 1              | Not-determined  | Genome-fragment | NA    | 0 |
| S8-final-viral-combined_k141_256120  | [full]      | 1322  | No  | NA    | 0  | 0 | Not-determined | Genome-fragment | NA              | 0     |   |
| S8-final-viral-combined_k141_141905  | [full]      | 13640 | No  | NA    | 0  | 7 | Not-determined | Genome-fragment | NA              | 0     |   |
| S12-final-viral-combined_k141_314092 | [full]      | 10245 | No  | NA    | 1  | 0 | Low-quality    | Genome-fragment | 14.62           | 0     |   |
| S8-final-viral-combined_k141_48886   | [full]      | 2984  | No  | NA    | 0  | 2 | Not-determined | Genome-fragment | NA              | 0     |   |
| S9-final-viral-combined_k141_40304   | [full]      | 10247 | No  | NA    | 0  | 1 | Not-determined | Genome-fragment | 23.59           | 0     |   |
| S2_k141_236273                       |             | 10251 | No  | NA    | 0  | 3 | Low-quality    | Genome-fragment | 3.08            | 0     |   |
| S8-final-viral-combined_k141_245392  | [full]      | 1211  | No  | NA    | 0  | 1 | Not-determined | Genome-fragment | NA              | 0     |   |
| S8-final-viral-combined_k141_120904  | [full]      | 10511 | No  | NA    | 0  | 7 | Not-determined | Genome-fragment | NA              | 0     |   |
| S8-final-viral-combined_k141_245400  | [full]      | 2055  | No  | NA    | 0  | 0 | Not-determined | Genome-fragment | NA              | 0     |   |
| S8-final-viral-combined_k141_153078  | [full]      | 2088  | No  | NA    | 0  | 1 | Not-determined | Genome-fragment | NA              | 0     |   |
| S8-final-viral-combined_k141_120908  | [full]      | 2220  | No  | NA    | 0  | 1 | Not-determined | Genome-fragment | NA              | 0     |   |
| S8-final-viral-combined_k141_164289  | [full]      | 33007 | No  | NA    | 18 | 0 | High-quality   | High-quality    | 92.4            | 0     |   |
| S8-final-viral-combined_k141_106361  | [full]      | 3048  | No  | NA    | 0  | 2 | Not-determined | Genome-fragment | NA              | 0     |   |
| S1-final-viral-combined_k141_28588   | [full]      | 10266 | No  | NA    | 2  | 0 | Low-quality    | Genome-fragment | 25.19           | 0     |   |
| S8-final-viral-combined_k141_153089  | [full]      | 2356  | No  | NA    | 0  | 2 | Not-determined | Genome-fragment | NA              | 0     |   |
| S8-final-viral-combined_k141_72840   | [full]      | 3106  | No  | NA    | 0  | 0 | Not-determined | Genome-fragment | NA              | 0     |   |
| S8-final-viral-combined_k141_188803  | [full]      | 9588  | No  | NA    | 0  | 8 | Not-determined | Genome-fragment | NA              | 0     |   |
| S3_k141_231239                       |             | 10276 | No  | NA    | 6  | 0 | Low-quality    | Genome-fragment | 28.41           | 0     |   |
| S8-final-viral-combined_k141_268054  | [full]      | 9596  | No  | NA    | 0  | 0 | Not-determined | Genome-fragment | NA              | 0     |   |
| S8-final-viral-combined_k141_26436   | [full]      | 1703  | No  | NA    | 0  | 2 | Not-determined | Genome-fragment | NA              | 0     |   |
| S8-final-viral-combined_k141_118136  | [full]      | 5759  | No  | NA    | 0  | 4 | Not-determined | Genome-fragment | NA              | 0     |   |
| S8-final-viral-combined_k141_221690  | [full]      | 2757  | No  | NA    | 0  | 2 | Not-determined | Genome-fragment | NA              | 0     |   |
| S8-final-viral-combined_k141_95615   | [full]      | 1392  | No  | NA    | 0  | 0 | Not-determined | Genome-fragment | NA              | 0     |   |
| S8-final-viral-combined_k141_176504  | [full]      | 3642  | No  | NA    | 0  | 2 | Not-determined | Genome-fragment | NA              | 0     |   |
| S8-final-viral-combined_k141_164147  | [full]      | 1897  | No  | NA    | 0  | 2 | Not-determined | Genome-fragment | NA              | 0     |   |
| S8-final-viral-combined_k141_2996    | [full]      | 1846  | No  | NA    | 0  | 0 | Not-determined | Genome-fragment | NA              | 0     |   |
| S8-final-viral-combined_k141_95628   | [full]      | 1509  | No  | NA    | 0  | 1 | Not-determined | Genome-fragment | NA              | 0     |   |
| S8-final-viral-combined_k141_268071  | [full]      | 1703  | No  | NA    | 0  | 0 | Not-determined | Genome-fragment | NA              | 0     |   |
| S8-final-viral-combined_k141_95637   | [full]      | 5890  | No  | NA    | 0  | 4 | Not-determined | Genome-fragment | NA              | 0     |   |
| S8-final-viral-combined_k141_72891   | [full]      | 5785  | No  | NA    | 0  | 2 | Not-determined | Genome-fragment | NA              | 0     |   |
| S8-final-viral-combined_k141_187621  | [full]      | 1288  | No  | NA    | 0  | 1 | Not-determined | Genome-fragment | NA              | 0     |   |
| S8-final-viral-combined_k141_95641   | [full]      | 3095  | No  | NA    | 0  | 3 | Not-determined | Genome-fragment | NA              | 0     |   |
| S8-final-viral-combined_k141_72896   | [full]      | 1125  | No  | NA    | 0  | 1 | Not-determined | Genome-fragment | NA              | 0     |   |
| S5-final-viral-combined_k141_45678   | [full]      | 10288 | No  | NA    | 0  | 9 | Low-quality    | Genome-fragment | 2.5             | 0     |   |
| S8-final-viral-combined_k141_83382   | [full]      | 1449  | No  | NA    | 0  | 0 | Not-determined | Genome-fragment | NA              | 0     |   |
| S7-final-viral-combined_k141_8392    | [full]      | 10295 | No  | NA    | 3  | 0 | Low-quality    | Genome-fragment | 22.4            | 0     |   |
| S8-final-viral-combined_k141_256265  | [full]      | 1105  | No  | NA    | 0  | 0 | Not-determined | Genome-fragment | NA              | 0     |   |
| S8-final-viral-combined_k141_48935   | [full]      | 6541  | No  | NA    | 0  | 3 | Not-determined | Genome-fragment | NA              | 0     |   |
| S8-final-viral-combined_k141_286118  | [full]      | 2856  | No  | NA    | 0  | 2 | Not-determined | Genome-fragment | NA              | 0     |   |
| S8-final-viral-combined_k141_268119  | [full]      | 1128  | No  | NA    | 0  | 1 | Not-determined | Genome-fragment | NA              | 0     |   |
| S11_k141_142891                      |             | 10298 | No  | NA    | 0  | 0 | Low-quality    | Genome-fragment | 19.12           | 0     |   |
| S8-final-viral-combined_k141_95675   | [full]      | 4612  | No  | NA    | 0  | 1 | Not-determined | Genome-fragment | NA              | 0     |   |
| S8-final-viral-combined_k141_210614  | [full]      | 1173  | No  | NA    | 0  | 0 | Not-determined | Genome-fragment | NA              | 0     |   |
| S8-final-viral-combined_k141_48968   | [full]      | 1494  | No  | NA    | 0  | 0 | Not-determined | Genome-fragment | NA              | 0     |   |
| S12_k141_177826                      |             | 10301 | No  | NA    | 0  | 1 | Low-quality    | Genome-fragment | 3.71            | 0     |   |
| S8-final-viral-combined_k141_153167  | [full]      | 1418  | No  | NA    | 0  | 1 | Not-determined | Genome-fragment | NA              | 0     |   |
| S12-final-viral-combined_k141_218837 | [full]      | 10307 | No  | NA    | 0  | 5 | Low-quality    | Genome-fragment | 7.86            | 0     |   |
| S2_k141_145075                       |             | 10307 | No  | NA    | 6  | 0 | Low-quality    | Genome-fragment | 23.91           | 0     |   |
| S8-final-viral-combined_k141_26595   | [full]      | 3039  | No  | NA    | 0  | 0 | Not-determined | Genome-fragment | NA              | 0     |   |
| S12-final-viral-combined_k141_169609 | [full]      | 10316 | No  | NA    | 3  | 0 | Low-quality    | Genome-fragment | 27.02           | 0     |   |
| S8-final-viral-combined_k141_114736  | [full]      | 10318 | No  | NA    | 7  | 0 | Low-quality    | Genome-fragment | 28.23           | 0     |   |
| S5_k141_131282                       |             | 10322 | No  | NA    | 0  | 7 | Low-quality    | Genome-fragment | 21.67           | 0     |   |
| S7-final-viral-combined_k141_27877   | [full]      | 10322 | No  | NA    | 2  | 0 | Low-quality    | Genome-fragment | 24.64           | 0     |   |
| S8-final-viral-combined_k141_153138  | [full]      | 1548  | No  | NA    | 0  | 0 | Not-determined | Genome-fragment | NA              | 0     |   |
| S8-final-viral-combined_k141_48955   | [full]      | 2967  | No  | NA    | 0  | 0 | Not-determined | Genome-fragment | NA              | 0     |   |
| S7-final-viral-combined_k141_167452  | [full]      | 10324 | No  | NA    | 1  | 2 | Low-quality    | Genome-fragment | 7.44            | 0     |   |
| S8-final-viral-combined_k141_3085    | [full]      | 2429  | No  | NA    | 0  | 0 | Not-determined | Genome-fragment | NA              | 0     |   |
| S8-final-viral-combined_k141_49009   | [full]      | 2002  | No  | NA    | 0  | 2 | Not-determined | Genome-fragment | NA              | 0     |   |
| S8-final-viral-combined_k141_72911   | [full]      | 60264 | Yes | 44670 | 20 | 8 | Medium-quality | Genome-fragment | 75.82           | 25.88 |   |
| S12-final-viral-combined_k141_85582  | [full]      | 10328 | No  | NA    | 0  | 0 | Low-quality    | Genome-fragment | 18.8            | 0     |   |
| S8-final-viral-combined_k141_49027   | [full]      | 2012  | No  | NA    | 0  | 1 | Not-determined | Genome-fragment | NA              | 0     |   |
| S9-final-viral-combined_k141_13758   | [full]      | 10339 | No  | NA    | 11 | 0 | Low-quality    | Genome-fragment | 25.7            | 0     |   |
| S8-final-viral-combined_k141_37817   | [full]      | 1458  | No  | NA    | 0  | 1 | Not-determined | Genome-fragment | NA              | 0     |   |
| S12-final-viral-combined_k141_118161 | [full]      | 10341 | No  | NA    | 0  | 1 | Low-quality    | Genome-fragment | 7.7             | 0     |   |
| S8-final-viral-combined_k141_106563  | [full]      | 4970  | No  | NA    | 0  | 1 | Not-determined | Genome-fragment | NA              | 0     |   |
| S8-final-viral-combined_k141_245504  | [full]      | 3633  | No  | NA    | 0  | 1 | Not-determined | Genome-fragment | NA              | 0     |   |
| S8-final-viral-combined_k141_130136  | [full]      | 1207  | No  | NA    | 0  | 1 | Not-determined | Genome-fragment | NA              | 0     |   |
| S7_k141_93176                        |             | 10369 | No  | NA    | 0  | 0 | Low-quality    | Genome-fragment | 20.61           | 0     |   |
| S8-final-viral-combined_k141_221840  | [full]      | 1004  | No  | NA    | 0  | 1 | Not-determined | Genome-fragment | NA              | 0     |   |
| S8-final-viral-combined_k141_27577   | [full]      | 3017  | No  | NA    | 0  | 5 | Not-determined | Genome-fragment | NA              | 0     |   |
| S3_k141_65729                        |             | 10371 | No  | NA    | 6  | 0 | Low-quality    | Genome-fragment | 19.24           | 0     |   |
| S2-final-viral-combined_k141_171832  | [0,partial] | 10374 | No  | NA    | 0  | 8 | Low-quality    | Genome-fragment | 1.27            | 0     |   |
| S8-final-viral-combined_k141_13906   | [full]      | 2157  | No  | NA    | 0  | 1 | Not-determined | Genome-fragment | NA              | 0     |   |
| S8-final-viral-combined_k141_221848  | [full]      | 3799  | No  | NA    | 0  | 2 | Not-determined | Genome-fragment | NA              | 0     |   |
| S8-final-viral-combined_k141_210674  | [full]      | 1012  | No  | NA    | 0  | 0 | Not-determined | Genome-fragment | NA              | 0     |   |
| S8-final-viral-combined_k141_49107   | [full]      | 5402  | No  | NA    | 0  | 0 | Not-determined | Genome-fragment | NA              | 0     |   |
| S11-final-viral-combined_k141_297347 | [full]      | 10379 | No  | NA    | 3  | 1 | Low-quality    | Genome-fragment | 22.26           | 0     |   |
| S4_k141_154470                       |             | 10381 | No  | NA    | 0  | 0 | Not-determined | Genome-fragment | 1.51            | 0     |   |
| S8-final-viral-combined_k141_130212  | [full]      | 1104  | No  | NA    | 0  | 1 | Not-determined | Genome-fragment | NA              | 0     |   |
| S8-final-viral-combined_k141_164515  | [full]      | 1429  | No  | NA    | 0  | 0 | Not-determined | Genome-fragment | NA              | 0     |   |
| S11-final-viral-combined_k141_24536  | [full]      | 10384 | No  | NA    | 7  | 0 | Low-quality    | Genome-fragment | 26.37           | 0     |   |
| S1_k141_56696                        |             | 10385 | No  | NA    | 0  | 5 | Low-quality    | Genome-fragment | 9.26            | 0     |   |
| S8-final-viral-combined_k141_210720  | [full]      | 1726  | No  | NA    | 0  | 1 | Not-determined | Genome-fragment | NA              | 0     |   |
| S8-final-viral-combined_k141_19905   | [full]      | 1078  | No  | NA    | 0  | 1 | Not-determined | Genome-fragment | NA              | 0     |   |
| S8-final-viral-combined_k141_268325  | [full]      | 2445  | No  | NA    | 0  | 1 | Not-determined | Genome-fragment | NA              | 0     |   |
| S4-final-viral-combined_k141_34944   | [full]      | 10389 | No  | NA    | 8  | 0 | Low-quality    | Genome-fragment | 29.22           | 0     |   |
| S17-final-viral-combined_k141_185264 | [full]      | 10390 | Yes | 3994  | 2  | 4 | Low-quality    | Genome-fragment | 7.53            | 61.56 |   |
| S7-final-viral-combined_k141_4238    | [full]      | 10398 | No  | NA    | 0  | 1 | Low-quality    | Genome-fragment | 17.88           | 0     |   |
| S8-final-viral-combined_k141_176817  | [full]      | 2436  | No  | NA    | 0  | 2 | Not-determined | Genome-fragment | NA              | 0     |   |
| S8-final-viral-combined_k141_187903  | [full]      | 1493  | No  | NA    | 0  | 0 | Not-determined | Genome-fragment | NA              | 0     |   |
| S8-final-viral-combined_k141_210766  | [full]      | 3880  | No  | NA    | 0  | 1 | Not-determined | Genome-fragment | NA              | 0     |   |
| S8-final-viral-combined_k141_17970   | [full]      | 14080 | No  | NA    | 0  | 6 | Not-determined | Genome-fragment | NA              | 0     |   |
| S12-final-viral-combined_k141_224618 | [full]      | 10410 | No  | NA    | 3  | 1 | Low-quality    | Genome-fragment | 22.88           | 0     |   |
| S8-final-viral-combined_k141_49211   | [full]      | 4159  | No  | NA    | 0  | 3 | Not-determined | Genome-fragment | NA              | 0     |   |
| S8-final-viral-combined_k141_268400  | [full]      | 1187  | No  | NA    | 0  | 1 | Not-determined | Genome-fragment | NA              | 0     |   |
| S8-final-viral-combined_k141_210830  | [full]      | 4512  | No  | NA    | 0  | 2 | Not-determined | Genome-fragment | NA              | 0     |   |
| S8-final-viral-combined_k141_118462  | [full]      | 1212  | No  | NA    | 0  | 2 | Not-determined | Genome-fragment | NA              | 0     |   |
| S8-final-viral-combined_k141_210831  | [full]      | 6871  | No  | NA    | 0  | 0 | Not-determined | Genome-fragment | NA              | 0     |   |
| S11_k141_235215                      |             | 10419 | No  | NA    | 10 | 0 | Low-quality    | Genome-fragment | 28.83           | 0     |   |
| S12-final-viral-combined_k141_302222 | [full]      | 10419 | No  | NA    | 3  | 0 | Low-quality    | Genome-fragment | 16.44           | 0     |   |
| S8-final-viral-combined_k141_21360   | [full]      | 3051  | No  | NA    | 0  | 1 | Not-determined | Genome-fragment | NA              | 0     |   |
| S8-final-viral-combined_k141_176896  | [full]      | 1673  | No  | NA    | 0  | 2 | Not-determined | Genome-fragment | NA              | 0     |   |
| S6-final-viral-combined_k141_84322   | [full]      | 10424 | No  | NA    | 0  | 7 | Low-quality    | Genome-fragment | 7.72            | 0     |   |
| S2-final-viral-combined_k141_151921  | [full]      | 10427 | No  | NA    | 0  | 0 | Low-quality    | Genome-fragment | 28.66           | 0     |   |
| S12_k141_388449                      |             | 10428 | No  | NA    | 0  | 5 | Low-quality    | Genome-fragment | 9.64            | 0     |   |
| S8-final-viral-combined_k141_153417  | [full]      | 2224  | No  | NA    | 0  | 0 | Not-determined | Genome-fragment | NA              | 0     |   |
| S8-final-viral-combined_k141_106774  | [full]      | 6627  | No  | NA    | 0  | 8 | Not-determined | Genome-fragment | NA              | 0     |   |
| S1-final-viral-combined_k141_210541  | [full]      | 10433 | No  | NA    | 8  | 0 | Low-quality    | Genome-fragment | 26.31           | 0     |   |
| S8_k141_26766                        |             | 10438 | No  | NA    | 1  | 2 | Low-quality    | Genome-fragment | 9.51            | 0     |   |
| S8-final-viral-combined_k141_210858  | [full]      | 2153  | No  | NA    | 0  | 0 | Not-determined | Genome-fragment | NA              | 0     |   |
| S5-final-viral-combined_k141_30731   | [full]      | 10439 | No  | NA    | 0  | 1 | Low-quality    | Genome-fragment | 16.45           | 0     |   |
| S12_k141_131498                      |             | 10446 | No  | NA    | 1  | 0 | Low-quality    | Genome-fragment | 3.72            | 0     |   |
| S8_k141_148203                       |             | 10447 | No  | NA    | 2  | 0 | Low-quality    | Genome-fragment | 19.77           | 0     |   |
| S8-final-viral-combined_k141_118538  | [full]      | 1592  | No  | NA    | 0  | 0 | Not-determined | Genome-fragment | NA              | 0     |   |
| S8-final-viral-combined_k141_106790  | [full]      | 3989  | No  | NA    | 0  | 0 | Not-determined | Genome-fragment | NA              | 0     |   |
| S1-final-viral-combined_k141_85258   | [0,partial] | 10449 | Yes | 2359  | 2  | 7 | Low-quality    | Genome-fragment | 2.64            | 77.42 |   |
| S4_k141_63561                        |             | 10450 | No  | NA    | 0  | 0 | Low-quality    | Genome-fragment | 17.45           | 0     |   |
| S8-final-viral-combined_k141_26879   | [full]      | 2890  | No  | NA    | 0  | 0 | Not-determined | Genome-fragment | NA              | 0     |   |
| S8-final-viral-combined_k141_61112   | [full]      | 4348  | No  | NA    | 0  | 2 | Not-determined |                 |                 |       |   |



|                                      |              |       |     |    |      |    |                |                 |    |       |       |
|--------------------------------------|--------------|-------|-----|----|------|----|----------------|-----------------|----|-------|-------|
| S8-final-viral-combined_k141_613281  | [full]       | 2194  | No  | NA | 0    | 1  | Not-determined | Genome-fragment | NA |       | 0     |
| S5-final-viral-combined_k141_188071  | [full]       | 10597 | No  | NA | 0    | 1  | Low-quality    | Genome-fragment | NA | 6.84  | 0     |
| S8-final-viral-combined_k141_222264  | [full]       | 2342  | No  | NA | 0    | 3  | Not-determined | Genome-fragment | NA |       | 0     |
| S8-final-viral-combined_k141_256401  | [full]       | 2240  | No  | NA | 0    | 0  | Not-determined | Genome-fragment | NA |       | 0     |
| S6_k141_121334                       |              | 10597 | No  | NA | 1    | 2  | Low-quality    | Genome-fragment | NA | 5.75  | 0     |
| S8-final-viral-combined_k141_61341   | [full]       | 2253  | No  | NA | 0    | 1  | Not-determined | Genome-fragment | NA |       | 0     |
| S6-final-viral-combined_k141_96082   | [full]       | 10607 | No  | NA | 5    | 0  | Low-quality    | Genome-fragment | NA | 26.41 | 0     |
| S8-final-viral-combined_k141_61342   | [full]       | 2403  | No  | NA | 0    | 2  | Not-determined | Genome-fragment | NA |       | 0     |
| S8-final-viral-combined_k141_107094  | [full]       | 5458  | No  | NA | 0    | 2  | Not-determined | Genome-fragment | NA |       | 0     |
| S8-final-viral-combined_k141_234473  | [full]       | 3037  | No  | NA | 1    | 0  | Medium-quality | Genome-fragment | NA | 55.04 | 0     |
| S1-final-viral-combined_k141_3623    | [full]       | 10609 | No  | NA | 4    | 1  | Low-quality    | Genome-fragment | NA | 24.85 | 0     |
| S1-final-viral-combined_k141_109127  | [full]       | 10610 | No  | NA | 5    | 0  | Low-quality    | Genome-fragment | NA | 18.11 | 0     |
| S8-final-viral-combined_k141_27189   | [full]       | 1265  | No  | NA | 0    | 3  | Not-determined | Genome-fragment | NA |       | 0     |
| S17-final-viral-combined_k141_183098 | [full]       | 10610 | No  | NA | 1    | 0  | Low-quality    | Genome-fragment | NA | 29.02 | 0     |
| S8-final-viral-combined_k141_3483    | [full]       | 11175 | No  | NA | 0    | 7  | Not-determined | Genome-fragment | NA |       | 0     |
| S8-final-viral-combined_k141_234507  | [full]       | 2466  | No  | NA | 0    | 0  | Not-determined | Genome-fragment | NA |       | 0     |
| S8-final-viral-combined_k141_130623  | [full]       | 1997  | No  | NA | 0    | 1  | Not-determined | Genome-fragment | NA |       | 0     |
| S8-final-viral-combined_k141_153730  | [full]       | 1646  | No  | NA | 0    | 0  | Not-determined | Genome-fragment | NA |       | 0     |
| S8-final-viral-combined_k141_199267  | [full]       | 1528  | No  | NA | 0    | 2  | Not-determined | Genome-fragment | NA |       | 0     |
| S6_k141_57436                        |              | 10613 | No  | NA | 13   | 0  | Low-quality    | Genome-fragment | NA | 23.29 | 0     |
| S8-final-viral-combined_k141_162592  | [0, partial] | 10621 | No  | NA | 1    | 6  | Low-quality    | Genome-fragment | NA | 7.14  | 0     |
| S11-final-viral-combined_k141_96729  | [full]       | 10626 | No  | NA | 7    | 0  | Low-quality    | Genome-fragment | NA | 26.01 | 0     |
| S8-final-viral-combined_k141_3511    | [full]       | 3953  | No  | NA | 0    | 1  | Not-determined | Genome-fragment | NA |       | 0     |
| S12_k141_375093                      |              | 10628 | No  | NA | 0    | 7  | Low-quality    | Genome-fragment | NA | 9.64  | 0     |
| S8-final-viral-combined_k141_234548  | [full]       | 2597  | No  | NA | 0    | 2  | Not-determined | Genome-fragment | NA |       | 0     |
| S1-final-viral-combined_k141_240285  | [full]       | 10636 | No  | NA | 11   | 0  | Low-quality    | Genome-fragment | NA | 14.93 | 0     |
| S8-final-viral-combined_k141_177251  | [full]       | 3729  | No  | NA | 0    | 2  | Not-determined | Genome-fragment | NA |       | 0     |
| S8-final-viral-combined_k141_211119  | [full]       | 25630 | No  | NA | 7    | 0  | Medium-quality | Genome-fragment | NA | 61.51 | 0     |
| S17-final-viral-combined_k141_8959   | [full]       | 10632 | No  | NA | 6    | 0  | Low-quality    | Genome-fragment | NA | 5.73  | 0     |
| S8-final-viral-combined_k141_142597  | [full]       | 3737  | No  | NA | 0    | 1  | Not-determined | Genome-fragment | NA |       | 0     |
| S11-final-viral-combined_k141_315528 | [0, partial] | 10662 | Yes | NA | 4172 | 2  | 6 Low-quality  | Genome-fragment | NA | 5.05  | 60.87 |
| S8-final-viral-combined_k141_130663  | [full]       | 1676  | No  | NA | 0    | 1  | Not-determined | Genome-fragment | NA |       | 0     |
| S8-final-viral-combined_k141_222362  | [full]       | 1414  | No  | NA | 0    | 0  | Not-determined | Genome-fragment | NA |       | 0     |
| S8-final-viral-combined_k141_73378   | [full]       | 1634  | No  | NA | 0    | 1  | Not-determined | Genome-fragment | NA |       | 0     |
| S2_k141_105039                       |              | 10666 | No  | NA | 0    | 1  | Low-quality    | Genome-fragment | NA | 13.34 | 0     |
| S8-final-viral-combined_k141_177294  | [full]       | 3472  | No  | NA | 0    | 2  | Not-determined | Genome-fragment | NA |       | 0     |
| S8-final-viral-combined_k141_230278  | [full]       | 10673 | No  | NA | 1    | 4  | Low-quality    | Genome-fragment | NA | 6.76  | 0     |
| S8-final-viral-combined_k141_177309  | [full]       | 2997  | No  | NA | 0    | 1  | Not-determined | Genome-fragment | NA |       | 0     |
| S7-final-viral-combined_k141_154406  | [full]       | 10679 | No  | NA | 0    | 1  | Low-quality    | Genome-fragment | NA | 24.56 | 0     |
| S8-final-viral-combined_k141_177347  | [full]       | 1995  | No  | NA | 0    | 0  | Not-determined | Genome-fragment | NA |       | 0     |
| S8-final-viral-combined_k141_107335  | [full]       | 1218  | No  | NA | 0    | 0  | Not-determined | Genome-fragment | NA |       | 0     |
| S8-final-viral-combined_k141_96169   | [full]       | 1672  | No  | NA | 0    | 0  | Not-determined | Genome-fragment | NA |       | 0     |
| S8-final-viral-combined_k141_153767  | [full]       | 1866  | No  | NA | 0    | 0  | Not-determined | Genome-fragment | NA |       | 0     |
| S17-final-viral-combined_k141_257936 | [full]       | 10690 | No  | NA | 1    | 4  | Low-quality    | Genome-fragment | NA | 9.71  | 0     |
| S8-final-viral-combined_k141_83929   | [full]       | 2003  | No  | NA | 0    | 0  | Not-determined | Genome-fragment | NA |       | 0     |
| S8-final-viral-combined_k141_168766  | [full]       | 1033  | No  | NA | 0    | 1  | Not-determined | Genome-fragment | NA |       | 0     |
| S8-final-viral-combined_k141_144269  | [full]       | 10698 | No  | NA | 3    | 0  | Low-quality    | Genome-fragment | NA | 26    | 0     |
| S1-final-viral-combined_k141_145295  | [full]       | 10711 | No  | NA | 5    | 0  | Low-quality    | Genome-fragment | NA | 22.08 | 0     |
| S8-final-viral-combined_k141_38370   | [full]       | 4459  | No  | NA | 0    | 5  | Not-determined | Genome-fragment | NA |       | 0     |
| S11-final-viral-combined_k141_198187 | [full]       | 10713 | No  | NA | 10   | 0  | Low-quality    | Genome-fragment | NA | 32.79 | 0     |
| S1-final-viral-combined_k141_321604  | [full]       | 10718 | No  | NA | 4    | 0  | Low-quality    | Genome-fragment | NA | 23.4  | 0     |
| S11_k141_218271                      |              | 10719 | No  | NA | 0    | 1  | Low-quality    | Genome-fragment | NA | 18.02 | 0     |
| S8-final-viral-combined_k141_61493   | [full]       | 1137  | No  | NA | 0    | 1  | Not-determined | Genome-fragment | NA |       | 0     |
| S8-final-viral-combined_k141_49659   | [full]       | 4375  | No  | NA | 0    | 1  | Not-determined | Genome-fragment | NA |       | 0     |
| S4-final-viral-combined_k141_65995   | [0, partial] | 10739 | No  | NA | 1    | 5  | Low-quality    | Genome-fragment | NA | 19.66 | 0     |
| S8-final-viral-combined_k141_61496   | [full]       | 4384  | No  | NA | 0    | 3  | Not-determined | Genome-fragment | NA |       | 0     |
| S8-final-viral-combined_k141_83998   | [full]       | 8540  | No  | NA | 0    | 5  | Not-determined | Genome-fragment | NA |       | 0     |
| S9_k141_3036                         |              | 10744 | No  | NA | 1    | 4  | Low-quality    | Genome-fragment | NA | 16.26 | 0     |
| S11-final-viral-combined_k141_45081  | [full]       | 10754 | No  | NA | 1    | 7  | Low-quality    | Genome-fragment | NA | 5.83  | 0     |
| S8_k141_266646                       |              | 10757 | No  | NA | 8    | 0  | Low-quality    | Genome-fragment | NA | 33.1  | 0     |
| S8-final-viral-combined_k141_165130  | [full]       | 4473  | No  | NA | 0    | 3  | Not-determined | Genome-fragment | NA |       | 0     |
| S8-final-viral-combined_k141_34009   | [full]       | 3807  | No  | NA | 0    | 2  | Not-determined | Genome-fragment | NA |       | 0     |
| S2-final-viral-combined_k141_209184  | [full]       | 10761 | No  | NA | 0    | 0  | Low-quality    | Genome-fragment | NA | 24.73 | 0     |
| S4_k141_27422                        |              | 10761 | Yes | NA | 9655 | 1  | 1 Low-quality  | Genome-fragment | NA | 11.73 | 10.28 |
| S1-final-viral-combined_k141_183133  | [full]       | 10768 | No  | NA | 2    | 2  | Low-quality    | Genome-fragment | NA | 13.03 | 0     |
| S8-final-viral-combined_k141_246152  | [full]       | 4321  | No  | NA | 0    | 3  | Not-determined | Genome-fragment | NA |       | 0     |
| S8-final-viral-combined_k141_38501   | [full]       | 1631  | No  | NA | 0    | 2  | Not-determined | Genome-fragment | NA |       | 0     |
| S8-final-viral-combined_k141_153864  | [full]       | 2691  | No  | NA | 0    | 2  | Not-determined | Genome-fragment | NA |       | 0     |
| S8-final-viral-combined_k141_84046   | [full]       | 2188  | No  | NA | 0    | 1  | Not-determined | Genome-fragment | NA |       | 0     |
| S6-final-viral-combined_k141_20271   | [full]       | 10773 | No  | NA | 4    | 1  | Low-quality    | Genome-fragment | NA | 31.43 | 0     |
| S8-final-viral-combined_k141_256576  | [full]       | 1863  | No  | NA | 0    | 1  | Not-determined | Genome-fragment | NA |       | 0     |
| S8-final-viral-combined_k141_268887  | [full]       | 1397  | No  | NA | 0    | 1  | Not-determined | Genome-fragment | NA |       | 0     |
| S8-final-viral-combined_k141_65204   | [full]       | 10774 | No  | NA | 4    | 0  | Low-quality    | Genome-fragment | NA | 25.95 | 0     |
| S8-final-viral-combined_k141_61667   | [full]       | 1770  | No  | NA | 0    | 1  | Not-determined | Genome-fragment | NA |       | 0     |
| S9-final-viral-combined_k141_63218   | [full]       | 10777 | No  | NA | 0    | 4  | Low-quality    | Genome-fragment | NA | 21.19 | 0     |
| S2_k141_30457                        |              | 10817 | No  | NA | 0    | 5  | Low-quality    | Genome-fragment | NA | 4.08  | 0     |
| S8-final-viral-combined_k141_73539   | [full]       | 3863  | No  | NA | 0    | 3  | Not-determined | Genome-fragment | NA |       | 0     |
| S8-final-viral-combined_k141_49726   | [full]       | 3145  | No  | NA | 0    | 0  | Not-determined | Genome-fragment | NA |       | 0     |
| S4-final-viral-combined_k141_36448   | [0, partial] | 10802 | No  | NA | 0    | 1  | Low-quality    | Genome-fragment | NA | 7.27  | 0     |
| S8-final-viral-combined_k141_177505  | [full]       | 1641  | No  | NA | 0    | 1  | Not-determined | Genome-fragment | NA |       | 0     |
| S8-final-viral-combined_k141_177507  | [full]       | 1332  | No  | NA | 0    | 1  | Not-determined | Genome-fragment | NA |       | 0     |
| S8-final-viral-combined_k141_130847  | [full]       | 3571  | No  | NA | 0    | 2  | Not-determined | Genome-fragment | NA |       | 0     |
| S7-final-viral-combined_k141_189339  | [full]       | 10829 | No  | NA | 0    | 0  | Low-quality    | Genome-fragment | NA | 21.93 | 0     |
| S8-final-viral-combined_k141_153912  | [full]       | 4708  | No  | NA | 0    | 2  | Not-determined | Genome-fragment | NA |       | 0     |
| S5-final-viral-combined_k141_121501  | [full]       | 10838 | Yes | NA | 7397 | 2  | Low-quality    | Genome-fragment | NA | 13.24 | 31.75 |
| S17-k141_122708                      |              | 10839 | No  | NA | 4    | 0  | Low-quality    | Genome-fragment | NA | 16.75 | 0     |
| S8-final-viral-combined_k141_38572   | [full]       | 4784  | No  | NA | 0    | 2  | Not-determined | Genome-fragment | NA |       | 0     |
| S8-final-viral-combined_k141_119094  | [full]       | 2411  | No  | NA | 0    | 0  | Not-determined | Genome-fragment | NA |       | 0     |
| S8-final-viral-combined_k141_177526  | [full]       | 5339  | No  | NA | 0    | 1  | Not-determined | Genome-fragment | NA |       | 0     |
| S8-final-viral-combined_k141_268958  | [full]       | 3091  | No  | NA | 0    | 2  | Not-determined | Genome-fragment | NA |       | 0     |
| S12-final-viral-combined_k141_38330  | [full]       | 10844 | No  | NA | 1    | 1  | Low-quality    | Genome-fragment | NA | 15.44 | 0     |
| S1-final-viral-combined_k141_22082   | [full]       | 10845 | Yes | NA | 5930 | 3  | Low-quality    | Genome-fragment | NA | 4.47  | 45.34 |
| S8-final-viral-combined_k141_153930  | [full]       | 2296  | No  | NA | 0    | 0  | Not-determined | Genome-fragment | NA |       | 0     |
| S8-final-viral-combined_k141_130872  | [full]       | 1778  | No  | NA | 0    | 4  | Not-determined | Genome-fragment | NA |       | 0     |
| S17-final-viral-combined_k141_18366  | [full]       | 10866 | No  | NA | 0    | 0  | Low-quality    | Genome-fragment | NA | 26.99 | 0     |
| S8-final-viral-combined_k141_73579   | [full]       | 2758  | No  | NA | 0    | 0  | Not-determined | Genome-fragment | NA |       | 0     |
| S8-final-viral-combined_k141_268980  | [full]       | 1082  | No  | NA | 0    | 1  | Not-determined | Genome-fragment | NA |       | 0     |
| S8-final-viral-combined_k141_142745  | [full]       | 1717  | No  | NA | 0    | 2  | Not-determined | Genome-fragment | NA |       | 0     |
| S8-final-viral-combined_k141_49824   | [full]       | 1307  | No  | NA | 0    | 0  | Not-determined | Genome-fragment | NA |       | 0     |
| S8-final-viral-combined_k141_107424  | [full]       | 1199  | No  | NA | 0    | 0  | Not-determined | Genome-fragment | NA |       | 0     |
| S8-final-viral-combined_k141_38602   | [full]       | 4651  | No  | NA | 0    | 2  | Not-determined | Genome-fragment | NA |       | 0     |
| S7-final-viral-combined_k141_193451  | [full]       | 10868 | No  | NA | 0    | 1  | Low-quality    | Genome-fragment | NA | 11.72 | 0     |
| S8-final-viral-combined_k141_61694   | [full]       | 1694  | No  | NA | 0    | 0  | Not-determined | Genome-fragment | NA |       | 0     |
| S8-final-viral-combined_k141_14433   | [full]       | 1306  | No  | NA | 0    | 2  | Not-determined | Genome-fragment | NA |       | 0     |
| S2-final-viral-combined_k141_154623  | [0, partial] | 10887 | Yes | NA | 7001 | 6  | Low-quality    | Genome-fragment | NA | 4.96  | 35.69 |
| S1-final-viral-combined_k141_340270  | [full]       | 10891 | No  | NA | 0    | 7  | Low-quality    | Genome-fragment | NA | 22.53 | 0     |
| S8-final-viral-combined_k141_256653  | [full]       | 3148  | No  | NA | 0    | 2  | Not-determined | Genome-fragment | NA |       | 0     |
| S8-final-viral-combined_k141_107453  | [full]       | 5222  | No  | NA | 0    | 4  | Not-determined | Genome-fragment | NA |       | 0     |
| S8-final-viral-combined_k141_61699   | [full]       | 9412  | No  | NA | 0    | 0  | Not-determined | Genome-fragment | NA |       | 0     |
| S5-final-viral-combined_k141_40893   | [full]       | 10891 | No  | NA | 9    | 0  | Low-quality    | Genome-fragment | NA | 29.36 | 0     |
| S7_k141_31477                        |              | 10895 | No  | NA | 4    | 0  | Low-quality    | Genome-fragment | NA | 29.15 | 0     |
| S8-final-viral-combined_k141_84207   | [full]       | 2134  | No  | NA | 0    | 10 | Not-determined | Genome-fragment | NA |       | 0     |
| S8-final-viral-combined_k141_107489  | [full]       | 2406  | No  | NA | 0    | 3  | Not-determined | Genome-fragment | NA |       | 0     |
| S8-final-viral-combined_k141_188566  | [full]       | 9986  | No  | NA | 0    | 0  | Not-determined | Genome-fragment | NA |       | 0     |
| S8-final-viral-combined_k141_36440   | [full]       | 1703  | No  | NA | 0    | 0  | Not-determined | Genome-fragment | NA |       | 0     |
| S8-final-viral-combined_k141_107498  | [full]       | 3830  | No  | NA | 0    | 1  | Not-determined | Genome-fragment | NA |       | 0     |
| S2-final-viral-combined_k141_232295  | [full]       | 10896 | No  | NA | 1    | 0  | Low-quality    | Genome-fragment | NA | 17.89 | 0     |
| S8-final-viral-combined_k141_269082  | [full]       | 2170  | No  | NA | 0    | 0  | Not-determined | Genome-fragment | NA |       | 0     |
| S3-final-viral-combined_k141_132729  | [full]       | 10905 | No  | NA | 10   | 0  | Low-quality    | Genome-fragment | NA | 31.13 | 0     |
| S1-final-viral-combined_k141_127794  | [full]       | 10906 | No  | NA | 1    | 4  | Low-quality    | Genome-fragment | NA | 12.36 | 0     |
| S8-final-viral-combined_k141_211451  | [full]       | 2063  | No  | NA | 0    | 2  | Not-determined | Genome-fragment | NA |       | 0     |
| S5-final-viral-combined_k141_16811   | [full]       | 10908 | No  | NA | 0    | 0  | Low-quality    | Genome-fragment | NA | 26.74 | 0     |
| S9_k141_8129                         |              | 10915 | No  | NA | 12   | 0  | Low-quality    |                 |    |       |       |



|                                                 |       |     |       |    |    |                  |                 |       |       |
|-------------------------------------------------|-------|-----|-------|----|----|------------------|-----------------|-------|-------|
| S9-final-viral-combined_k141_109742 [O_partial  | 11055 | No  | NA    | 1  | 7  | Low-quality      | Genome-fragment | 9.92  | 0     |
| S8-final-viral-combined_k141_269329 [full       | 1181  | No  | NA    | 2  | 0  | Not-determined   | Genome-fragment | NA    | 0     |
| S1-final-viral-combined_k141_118100 [full       | 11056 | No  | NA    | 0  | 5  | Low-quality      | Genome-fragment | 5.66  | 0     |
| S8_k141_246316                                  | 11057 | No  | NA    | 0  | 0  | Low-quality      | Genome-fragment | 7.63  | 0     |
| S8-final-viral-combined_k141_165662 [full       | 2399  | No  | NA    | 0  | 1  | Not-determined   | Genome-fragment | NA    | 0     |
| S8-final-viral-combined_k141_14794 [full        | 1415  | No  | NA    | 0  | 2  | Not-determined   | Genome-fragment | NA    | 0     |
| S12-final-viral-combined_k141_301396 [full      | 11059 | No  | NA    | 1  | 3  | Low-quality      | Genome-fragment | 18.89 | 0     |
| S11-final-viral-combined_k141_26341 [full       | 11067 | No  | NA    | 1  | 2  | Low-quality      | Genome-fragment | 7.15  | 0     |
| S8-final-viral-combined_k141_131181 [full       | 1200  | No  | NA    | 0  | 0  | Low-quality      | Genome-fragment | NA    | 0     |
| S8-final-viral-combined_k141_165673 [full       | 1091  | No  | NA    | 0  | 1  | Not-determined   | Genome-fragment | NA    | 0     |
| S1-final-viral-combined_k141_156653 [full       | 11068 | No  | NA    | 10 | 0  | Low-quality      | Genome-fragment | 26.19 | 0     |
| S8-final-viral-combined_k141_177882 [full       | 1066  | No  | NA    | 0  | 0  | Not-determined   | Genome-fragment | NA    | 0     |
| S8-final-viral-combined_k141_154342 [full       | 1528  | No  | NA    | 0  | 1  | Not-determined   | Genome-fragment | NA    | 0     |
| S9_k141_50916                                   | 11072 | No  | NA    | 0  | 4  | Low-quality      | Genome-fragment | 8.95  | 0     |
| S8-final-viral-combined_k141_177897 [full       | 2600  | No  | NA    | 0  | 1  | Not-determined   | Genome-fragment | NA    | 0     |
| S2-final-viral-combined_k141_65567 [full        | 11073 | No  | NA    | 0  | 0  | Low-quality      | Genome-fragment | 16.5  | 0     |
| S12_k141_371328                                 | 11075 | No  | NA    | 1  | 4  | Low-quality      | Genome-fragment | 7.77  | 0     |
| S8-final-viral-combined_k141_143135 [full       | 7488  | No  | NA    | 0  | 5  | Not-determined   | Genome-fragment | NA    | 0     |
| S4-final-viral-combined_k141_39328 [full        | 11078 | No  | NA    | 0  | 6  | Low-quality      | Genome-fragment | NA    | 0     |
| S8-final-viral-combined_k141_14840 [full        | 1193  | No  | NA    | 0  | 2  | Not-determined   | Genome-fragment | NA    | 0     |
| S8-final-viral-combined_k141_246447 [full       | 1443  | No  | NA    | 0  | 2  | Not-determined   | Genome-fragment | NA    | 0     |
| S11-final-viral-combined_k141_215562 [full      | 11080 | No  | NA    | 0  | 0  | Low-quality      | Genome-fragment | 8.36  | 0     |
| S8-final-viral-combined_k141_14872 [full        | 2370  | No  | NA    | 0  | 0  | Not-determined   | Genome-fragment | NA    | 0     |
| S8-final-viral-combined_k141_62226 [full        | 1777  | No  | NA    | 0  | 1  | Not-determined   | Genome-fragment | NA    | 0     |
| S8-final-viral-combined_k141_188950 [full       | 1092  | No  | NA    | 0  | 1  | Not-determined   | Genome-fragment | NA    | 0     |
| S8-final-viral-combined_k141_165786 [full       | 1869  | No  | NA    | 0  | 1  | Not-determined   | Genome-fragment | NA    | 0     |
| S3-final-viral-combined_k141_2481 [full         | 11084 | No  | NA    | 0  | 6  | Low-quality      | Genome-fragment | 3.46  | 0     |
| S3-final-viral-combined_k141_152583 [full       | 11085 | Yes | NA    | 2  | 1  | Low-quality      | Genome-fragment | 6.9   | 4.84  |
| S11-final-viral-combined_k141_47214 [full       | 11094 | No  | NA    | 1  | 1  | Low-quality      | Genome-fragment | 24.15 | 0     |
| S9-final-viral-combined_k141_39747 [full        | 1098  | Yes | 6992  | 3  | 2  | Low-quality      | Genome-fragment | 11.6  | 37    |
| S8-final-viral-combined_k141_39136 [full        | 2148  | No  | NA    | 0  | 1  | Not-determined   | Genome-fragment | NA    | 0     |
| S8-final-viral-combined_k141_165739 [full       | 2797  | No  | NA    | 0  | 2  | Not-determined   | Genome-fragment | NA    | 0     |
| S8-final-viral-combined_k141_207717 [O_partial  | 11103 | Yes | 2633  | 2  | 7  | Low-quality      | Genome-fragment | 4.55  | 76.29 |
| S12-final-viral-combined_k141_64423 [full       | 11111 | No  | NA    | 0  | 6  | Low-quality      | Genome-fragment | 6.59  | 0     |
| S8-final-viral-combined_k141_19145 [full        | 3250  | No  | NA    | 0  | 1  | Not-determined   | Genome-fragment | NA    | 0     |
| S12-final-viral-combined_k141_277721 [O_partial | 11110 | No  | NA    | 0  | 1  | Low-quality      | Genome-fragment | 17.36 | 0     |
| S8-final-viral-combined_k141_235236 [full       | 5165  | No  | NA    | 0  | 3  | Not-determined   | Genome-fragment | NA    | 0     |
| S8_k141_253777                                  | 11146 | No  | NA    | 2  | 1  | Low-quality      | Genome-fragment | 21.78 | 0     |
| S7-final-viral-combined_k141_95028 [O_partial   | 11147 | No  | NA    | 1  | 4  | Low-quality      | Genome-fragment | 16.68 | 0     |
| S12-final-viral-combined_k141_186337 [full      | 11156 | No  | NA    | 0  | 1  | Low-quality      | Genome-fragment | 13.58 | 0     |
| S12-final-viral-combined_k141_371971 [O_partial | 11165 | No  | NA    | 1  | 1  | Low-quality      | Genome-fragment | 15.9  | 0     |
| S8-final-viral-combined_k141_269525 [full       | 3080  | No  | NA    | 0  | 2  | Not-determined   | Genome-fragment | NA    | 0     |
| S8-final-viral-combined_k141_14975 [full        | 2874  | No  | NA    | 0  | 2  | Not-determined   | Genome-fragment | NA    | 0     |
| S8-final-viral-combined_k141_269537 [full       | 2192  | No  | NA    | 0  | 2  | Not-determined   | Genome-fragment | NA    | 0     |
| S2_k141_199244                                  | 11170 | Yes | 8741  | 5  | 2  | Low-quality      | Genome-fragment | 5.16  | 21.75 |
| S8-final-viral-combined_k141_15009 [full        | 1613  | No  | NA    | 0  | 2  | Not-determined   | Genome-fragment | NA    | 0     |
| S8-final-viral-combined_k141_143239 [full       | 1037  | No  | NA    | 0  | 0  | Not-determined   | Genome-fragment | NA    | 0     |
| S8-final-viral-combined_k141_15011 [full        | 1245  | No  | NA    | 0  | 0  | Not-determined   | Genome-fragment | NA    | 0     |
| S8-final-viral-combined_k141_16982 [full        | 1660  | No  | NA    | 0  | 1  | Not-determined   | Genome-fragment | NA    | 0     |
| S8-final-viral-combined_k141_39228 [full        | 1994  | No  | NA    | 0  | 2  | Not-determined   | Genome-fragment | NA    | 0     |
| S12-final-viral-combined_k141_50426 [O_partial  | 11177 | No  | NA    | 0  | 9  | Low-quality      | Genome-fragment | 3.15  | 0     |
| S4-final-viral-combined_k141_125813 [full       | 11178 | No  | NA    | 1  | 1  | Low-quality      | Genome-fragment | 15.9  | 0     |
| S11-final-viral-combined_k141_212078 [O_partial | 11182 | No  | NA    | 2  | 4  | Low-quality      | Genome-fragment | 10.38 | 0     |
| S8-final-viral-combined_k141_178108 [full       | 2671  | No  | NA    | 0  | 1  | Not-determined   | Genome-fragment | NA    | 0     |
| S8-final-viral-combined_k141_235281 [full       | 1960  | No  | NA    | 0  | 2  | Not-determined   | Genome-fragment | NA    | 0     |
| S8-final-viral-combined_k141_62457 [full        | 4345  | No  | NA    | 0  | 2  | Not-determined   | Genome-fragment | NA    | 0     |
| S8-final-viral-combined_k141_27829 [full        | 3183  | No  | NA    | 0  | 2  | Not-determined   | Genome-fragment | NA    | 0     |
| S8-final-viral-combined_k141_22263 [full        | 4558  | No  | NA    | 0  | 3  | Not-determined   | Genome-fragment | NA    | 0     |
| S8-final-viral-combined_k141_246593 [full       | 2910  | No  | NA    | 0  | 2  | Not-determined   | Genome-fragment | NA    | 0     |
| S8-final-viral-combined_k141_15044 [full        | 5480  | No  | NA    | 0  | 1  | Not-determined   | Genome-fragment | NA    | 0     |
| S8-final-viral-combined_k141_235394 [full       | 3389  | No  | NA    | 0  | 3  | Not-determined   | Genome-fragment | NA    | 0     |
| S8-final-viral-combined_k141_154550 [full       | 2502  | No  | NA    | 0  | 3  | Not-determined   | Genome-fragment | NA    | 0     |
| S8-final-viral-combined_k141_50396 [full        | 2574  | No  | NA    | 0  | 0  | Not-determined   | Genome-fragment | NA    | 0     |
| S11_k141_29840                                  | 11190 | No  | NA    | 8  | 0  | Low-quality      | Genome-fragment | 21.18 | 0     |
| S8-final-viral-combined_k141_121056 [full       | 1877  | No  | NA    | 0  | 0  | Not-determined   | Genome-fragment | NA    | 0     |
| S11_k141_249433                                 | 11199 | No  | NA    | 0  | 5  | Low-quality      | Genome-fragment | 4.92  | 0     |
| S8-final-viral-combined_k141_235439 [full       | 1297  | No  | NA    | 0  | 0  | Not-determined   | Genome-fragment | NA    | 0     |
| S8-final-viral-combined_k141_24664 [full        | 2501  | No  | NA    | 0  | 0  | Not-determined   | Genome-fragment | NA    | 0     |
| S8-final-viral-combined_k141_74205 [full        | 2469  | No  | NA    | 0  | 0  | Not-determined   | Genome-fragment | NA    | 0     |
| S9-final-viral-combined_k141_40313 [full        | 11201 | No  | NA    | 5  | 0  | Low-quality      | Genome-fragment | 27.68 | 0     |
| S8-final-viral-combined_k141_235459 [full       | 1687  | No  | NA    | 0  | 0  | Not-determined   | Genome-fragment | NA    | 0     |
| S8-final-viral-combined_k141_244159 [full       | 11206 | No  | NA    | 0  | 0  | Low-quality      | Genome-fragment | 11.07 | 0     |
| S8-final-viral-combined_k141_189197 [full       | 2255  | No  | NA    | 0  | 1  | Not-determined   | Genome-fragment | NA    | 0     |
| S8-final-viral-combined_k141_133746 [full       | 11226 | No  | NA    | 1  | 1  | Low-quality      | Genome-fragment | 24.81 | 0     |
| S8-final-viral-combined_k141_383389 [O_partial  | 11232 | Yes | 4464  | 1  | 3  | Low-quality      | Genome-fragment | 2.89  | 60.26 |
| S8-final-viral-combined_k141_199815 [full       | 7879  | No  | NA    | 0  | 5  | Not-determined   | Genome-fragment | NA    | 0     |
| S8-final-viral-combined_k141_235514 [full       | 1576  | No  | NA    | 0  | 2  | Not-determined   | Genome-fragment | NA    | 0     |
| S2-final-viral-combined_k141_135149 [full       | 11261 | No  | NA    | 6  | 1  | Low-quality      | Genome-fragment | 18.83 | 0     |
| S8-final-viral-combined_k141_121170 [full       | 1063  | No  | NA    | 0  | 1  | Not-determined   | Genome-fragment | NA    | 0     |
| S8-final-viral-combined_k141_212171 [full       | 2201  | No  | NA    | 0  | 3  | Not-determined   | Genome-fragment | NA    | 0     |
| S1-final-viral-combined_k141_19944 [full        | 11266 | No  | NA    | 1  | 1  | Low-quality      | Genome-fragment | 17.05 | 0     |
| S8-final-viral-combined_k141_199851 [full       | 1070  | No  | NA    | 0  | 0  | Not-determined   | Genome-fragment | NA    | 0     |
| S3-final-viral-combined_k141_41523 [full        | 11267 | No  | NA    | 9  | 0  | Low-quality      | Genome-fragment | 30.97 | 0     |
| S8-final-viral-combined_k141_257058 [full       | 3697  | No  | NA    | 0  | 3  | Not-determined   | Genome-fragment | NA    | 0     |
| S8-final-viral-combined_k141_74668 [full        | 11270 | No  | NA    | 0  | 6  | Low-quality      | Genome-fragment | 6.14  | 0     |
| S8-final-viral-combined_k141_97112 [full        | 4909  | No  | NA    | 0  | 4  | Not-determined   | Genome-fragment | NA    | 0     |
| S8-final-viral-combined_k141_212193 [full       | 1970  | No  | NA    | 0  | 0  | Not-determined   | Genome-fragment | NA    | 0     |
| S8-final-viral-combined_k141_165934 [full       | 4737  | No  | NA    | 0  | 3  | Not-determined   | Genome-fragment | NA    | 0     |
| S8-final-viral-combined_k141_143445 [full       | 1875  | No  | NA    | 0  | 1  | Not-determined   | Genome-fragment | NA    | 0     |
| S8-final-viral-combined_k141_4374 [full         | 1796  | No  | NA    | 0  | 2  | Not-determined   | Genome-fragment | NA    | 0     |
| S1_k141_35582                                   | 11281 | No  | NA    | 4  | 1  | Low-quality      | Genome-fragment | 26.93 | 0     |
| S8-final-viral-combined_k141_119752 [full       | 3798  | No  | NA    | 0  | 2  | Not-determined   | Genome-fragment | NA    | 0     |
| S8-final-viral-combined_k141_235587 [full       | 1672  | No  | NA    | 0  | 0  | Not-determined   | Genome-fragment | NA    | 0     |
| S8-final-viral-combined_k141_269790 [full       | 2229  | No  | NA    | 0  | 1  | Not-determined   | Genome-fragment | NA    | 0     |
| S12-final-viral-combined_k141_54497 [full       | 11285 | No  | NA    | 0  | 0  | Low-quality      | Genome-fragment | NA    | 0     |
| S4-final-viral-combined_k141_85444 [O_partial   | 11294 | No  | NA    | 1  | 5  | Low-quality      | Genome-fragment | 7.31  | 0     |
| S5-final-viral-combined_k141_136478 [full       | 11301 | No  | NA    | 0  | 5  | Low-quality      | Genome-fragment | 4.46  | 0     |
| S8-final-viral-combined_k141_269806 [full       | 1213  | No  | NA    | 0  | 1  | Not-determined   | Genome-fragment | NA    | 0     |
| S2-final-viral-combined_k141_4369 [O_partial    | 11304 | No  | NA    | 11 | 1  | Low-quality      | Genome-fragment | 7.66  | 0     |
| S8-final-viral-combined_k141_97179 [O_partial   | 2298  | No  | NA    | 0  | 1  | Not-determined   | Genome-fragment | NA    | 0     |
| S8-final-viral-combined_k141_15251 [full        | 1573  | No  | NA    | 0  | 1  | Not-determined   | Genome-fragment | NA    | 0     |
| S8-final-viral-combined_k141_742715 [full       | 39915 | Yes | 22987 | 2  | 2  | Medium-quality   | Genome-fragment | 50.81 | 42.44 |
| S8-final-viral-combined_k141_62705 [full        | 1179  | No  | NA    | 0  | 2  | Not-determined   | Genome-fragment | NA    | 0     |
| S8-final-viral-combined_k141_97205 [full        | 2884  | No  | NA    | 0  | 2  | Not-determined   | Genome-fragment | NA    | 0     |
| S8-final-viral-combined_k141_233445 [full       | 1559  | No  | NA    | 0  | 0  | Not-determined   | Genome-fragment | NA    | 0     |
| S8-final-viral-combined_k141_212267 [full       | 1332  | No  | NA    | 0  | 0  | Not-determined   | Genome-fragment | NA    | 0     |
| S8-final-viral-combined_k141_74309 [full        | 2524  | No  | NA    | 0  | 2  | Not-determined   | Genome-fragment | NA    | 0     |
| S6_k141_120175                                  | 11308 | No  | NA    | 1  | 4  | Low-quality      | Genome-fragment | 4.87  | 0     |
| S8-final-viral-combined_k141_15286 [full        | 2559  | No  | NA    | 0  | 2  | Not-determined   | Genome-fragment | NA    | 0     |
| S7-final-viral-combined_k141_40737 [full        | 11309 | No  | NA    | 12 | 0  | Low-quality      | Genome-fragment | 23.6  | 0     |
| S9-final-viral-combined_k141_11616 [full        | 11311 | No  | NA    | 0  | 6  | Low-quality      | Genome-fragment | 4.89  | 0     |
| S8-final-viral-combined_k141_246861 [full       | 2473  | No  | NA    | 0  | 0  | Not-determined   | Genome-fragment | NA    | 0     |
| S5-final-viral-combined_k141_187294 [full       | 11313 | No  | NA    | 6  | 0  | Low-quality      | Genome-fragment | 28.03 | 0     |
| S8-final-viral-combined_k141_15316 [full        | 1255  | No  | NA    | 0  | 0  | Not-determined   | Genome-fragment | NA    | 0     |
| S7-final-viral-combined_k141_6380 [full         | 11313 | No  | NA    | 0  | 0  | Low-quality      | Genome-fragment | 8.35  | 0     |
| S8-final-viral-combined_k141_50685 [full        | 2149  | No  | NA    | 0  | 1  | Not-determined   | Genome-fragment | NA    | 0     |
| S17-final-viral-combined_k141_238852 [full      | 11318 | No  | NA    | 0  | 6  | Low-quality      | Genome-fragment | 6.3   | 0     |
| S8-final-viral-combined_k141_269906 [full       | 1644  | No  | NA    | 0  | 2  | Not-determined   | Genome-fragment | NA    | 0     |
| S8-final-viral-combined_k141_131735 [full       | 2118  | No  | NA    | 0  | 2  | Not-determined   | Genome-fragment | NA    | 0     |
| S8-final-viral-combined_k141_50700 [full        | 3371  | No  | NA    | 0  | 2  | Not-determined   | Genome-fragment | NA    | 0     |
| S2-final-viral-combined_k141_71237 [full        | 11323 | No  | NA    | 1  | 0  | Low-quality      | Genome-fragment | 20.85 | 0     |
| S8-final-viral-combined_k141_224495 [full       | 3124  | No  | NA    | 0  | 1  | Not-determined   | Genome-fragment | NA    | 0     |
| S7_k141_82868                                   | 11324 | No  | NA    | 0  | 1  | Low-quality      | Genome-fragment | 18.91 | 0     |
| S8-final-viral-combined_k141_22503 [full        | 4074  | No  | NA    | 0  | 0  | Not-determined   | Genome-fragment | NA    | 0     |
| S8-final-viral-combined_k141_189401 [full       | 1513  | No  | NA    | 0  | 0  | Not-determined   | Genome-fragment | NA    | 0     |
| S1-final-viral-combined_k141_172194 [O_partial  | 11326 | No  | NA    | 0  | 10 | Low-quality      | Genome-fragment | 5.13  | 0     |
| S8-final-viral-combined_k141_175803 [full       | 2631  | No  | NA    | 0  | 3  | Not-determined   | Genome-fragment | NA    | 0     |
| S12_k141_218683                                 | 11327 | No  | NA    | 0  | 1  | Low-quality      | Genome-fragment | 16.09 | 0     |
| S8-final-viral-combined_k141_189427 [full       | 2060  | No  | NA    | 0  | 2  | Not-determined   | Genome-fragment | NA    | 0     |
| S8-final-viral-combined_k141_28147 [full        | 8572  | No  | NA    | 0  | 5  | Not-determined   | Genome-fragment | NA    | 0     |
| S8-final-viral-combined_k141_108248 [full       | 24739 | No  | NA    | 0  | 18 | Not-determined   | Genome-fragment | NA    | 0     |
| S1_k141_237750                                  | 11328 | No  | NA    | 3  | 0  | Low-quality      | Genome-fragment | 12.48 | 0     |
| S11-final-viral-combined_k141_269687 [full      | 11329 | No  | NA    | 5  | 1  | Low-quality      | Genome-fragment | 26.45 | 0     |
| S8-final-viral-combined_k141_178515 [full       | 2390  | No  | NA    | 0  | 0  | Not-determined   | Genome-fragment | NA    | 0     |
| S8-final-viral-combined_k141_74369 [full        | 2512  | No  | NA    | 7  | 0  | Not-determined</ |                 |       |       |



|                                      |             |        |     |    |       |    |                |                 |    |       |       |
|--------------------------------------|-------------|--------|-----|----|-------|----|----------------|-----------------|----|-------|-------|
| S8-final-viral-combined_k141_745088  | [full]      | 1800   | No  | NA | 0     | 2  | Not-determined | Genome-fragment | NA |       | 0     |
| S11-final-viral-combined_k141_231951 | [full]      | 1201   | No  | NA | 1     | 0  | Low-quality    | Genome-fragment | NA | 26.24 | 0     |
| S8-final-viral-combined_k141_200019  | [full]      | 1506   | No  | NA | 0     | 2  | Not-determined | Genome-fragment | NA |       | 0     |
| S8-final-viral-combined_k141_257361  | [full]      | 1671   | No  | NA | 0     | 2  | Not-determined | Genome-fragment | NA |       | 0     |
| S4-final-viral-combined_k141_107856  | [full]      | 11396  | No  | NA | 1     | 1  | Low-quality    | Genome-fragment | NA | 13.57 | 0     |
| S8-final-viral-combined_k141_233674  | [full]      | 1614   | No  | NA | 0     | 2  | Not-determined | Genome-fragment | NA |       | 0     |
| S8-final-viral-combined_k141_311945  | [full]      | 2120   | No  | NA | 0     | 2  | Not-determined | Genome-fragment | NA |       | 0     |
| S8-final-viral-combined_k141_189651  | [full]      | 2358   | No  | NA | 0     | 0  | Not-determined | Genome-fragment | NA |       | 0     |
| S2_k141_277428                       | [full]      | 1463   | No  | NA | 10    | 0  | Low-quality    | Genome-fragment | NA | 37.64 | 0     |
| S8-final-viral-combined_k141_131953  | [full]      | 4231   | No  | NA | 0     | 0  | Not-determined | Genome-fragment | NA |       | 0     |
| S8-final-viral-combined_k141_97477   | [full]      | 10770  | No  | NA | 0     | 5  | Not-determined | Genome-fragment | NA |       | 0     |
| S8-final-viral-combined_k141_270250  | [full]      | 4376   | No  | NA | 0     | 4  | Not-determined | Genome-fragment | NA |       | 0     |
| S1-final-viral-combined_k141_52605   | [O_partial] | 14405  | No  | NA | 1     | 7  | Low-quality    | Genome-fragment | NA | 19.77 | 0     |
| S8-final-viral-combined_k141_97440   | [full]      | 2995   | No  | NA | 0     | 1  | Not-determined | Genome-fragment | NA |       | 0     |
| S11-final-viral-combined_k141_102842 | [O_partial] | 14406  | No  | NA | 1     | 0  | Low-quality    | Genome-fragment | NA | 21.31 | 0     |
| S8-final-viral-combined_k141_236065  | [full]      | 4320   | No  | NA | 0     | 5  | Not-determined | Genome-fragment | NA |       | 0     |
| S8-final-viral-combined_k141_39868   | [full]      | 1209   | No  | NA | 0     | 0  | Not-determined | Genome-fragment | NA |       | 0     |
| S17-final-viral-combined_k141_235527 | [full]      | 14418  | No  | NA | 5     | 0  | Low-quality    | Genome-fragment | NA | 14.33 | 0     |
| S8-final-viral-combined_k141_212537  | [full]      | 5247   | No  | NA | 0     | 1  | Not-determined | Genome-fragment | NA |       | 0     |
| S7_k141_199397                       |             | 14277  | No  | NA | 7     | 0  | Low-quality    | Genome-fragment | NA | 29.3  | 0     |
| S6_k141_48799                        |             | 11429  | No  | NA | 0     | 1  | Low-quality    | Genome-fragment | NA | 11.51 | 0     |
| S5-final-viral-combined_k141_471     | [full]      | 11449  | No  | NA | 6     | 0  | Low-quality    | Genome-fragment | NA | 30.55 | 0     |
| S11-final-viral-combined_k141_119641 | [full]      | 1454   | No  | NA | 6     | 0  | Low-quality    | Genome-fragment | NA | 31.08 | 0     |
| S8-final-viral-combined_k141_257421  | [full]      | 2065   | No  | NA | 0     | 2  | Not-determined | Genome-fragment | NA |       | 0     |
| S1-final-viral-combined_k141_302539  | [full]      | 14455  | Yes | NA | 7834  | 1  | Low-quality    | Genome-fragment | NA | 4.04  | 31.61 |
| S8-final-viral-combined_k141_39911   | [full]      | 2567   | No  | NA | 0     | 1  | Not-determined | Genome-fragment | NA |       | 0     |
| S9_k141_70965                        |             | 14456  | Yes | NA | 367   | 1  | Low-quality    | Genome-fragment | NA | 0.24  | 96.8  |
| S3-final-viral-combined_k141_58440   | [full]      | 14462  | No  | NA | 0     | 7  | Low-quality    | Genome-fragment | NA | 7.09  | 0     |
| S2-final-viral-combined_k141_129815  | [full]      | 14466  | Yes | NA | 4152  | 0  | Low-quality    | Genome-fragment | NA | 1.49  | 63.79 |
| S8-final-viral-combined_k141_189701  | [full]      | 2286   | No  | NA | 1     | 2  | Not-determined | Genome-fragment | NA |       | 0     |
| S8-final-viral-combined_k141_155075  | [full]      | 3019   | No  | NA | 0     | 1  | Not-determined | Genome-fragment | NA |       | 0     |
| S8-final-viral-combined_k141_236164  | [full]      | 3910   | No  | NA | 0     | 3  | Not-determined | Genome-fragment | NA |       | 0     |
| S8-final-viral-combined_k141_247410  | [full]      | 1109   | No  | NA | 0     | 0  | Not-determined | Genome-fragment | NA |       | 0     |
| S8-final-viral-combined_k141_143923  | [full]      | 2149   | No  | NA | 0     | 0  | Not-determined | Genome-fragment | NA |       | 0     |
| S8-final-viral-combined_k141_28631   | [full]      | 1303   | No  | NA | 0     | 2  | Not-determined | Genome-fragment | NA |       | 0     |
| S9-final-viral-combined_k141_123844  | [O_partial] | 14477  | Yes | NA | 1741  | 1  | Low-quality    | Genome-fragment | NA | 8.66  | 84.83 |
| S8-final-viral-combined_k141_143942  | [full]      | 1682   | No  | NA | 0     | 0  | Not-determined | Genome-fragment | NA |       | 0     |
| S8-final-viral-combined_k141_28620   | [full]      | 6412   | No  | NA | 0     | 1  | Not-determined | Genome-fragment | NA |       | 0     |
| S8-final-viral-combined_k141_143958  | [full]      | 2194   | No  | NA | 0     | 1  | Not-determined | Genome-fragment | NA |       | 0     |
| S8-final-viral-combined_k141_178934  | [full]      | 3116   | No  | NA | 0     | 2  | Not-determined | Genome-fragment | NA |       | 0     |
| S1-final-viral-combined_k141_148194  | [full]      | 11479  | No  | NA | 3     | 1  | Low-quality    | Genome-fragment | NA | 22.95 | 0     |
| S8-final-viral-combined_k141_247421  | [full]      | 9665   | No  | NA | 0     | 0  | Not-determined | Genome-fragment | NA |       | 0     |
| S8-final-viral-combined_k141_63247   | [full]      | 2286   | No  | NA | 0     | 0  | Not-determined | Genome-fragment | NA |       | 0     |
| S8-final-viral-combined_k141_511315  | [full]      | 3820   | No  | NA | 0     | 3  | Not-determined | Genome-fragment | NA |       | 0     |
| S8-final-viral-combined_k141_257494  | [full]      | 1786   | No  | NA | 0     | 1  | Not-determined | Genome-fragment | NA |       | 0     |
| S1-final-viral-combined_k141_282183  | [full]      | 14462  | No  | NA | 0     | 0  | Low-quality    | Genome-fragment | NA | 27.51 | 0     |
| S8-final-viral-combined_k141_247463  | [full]      | 3103   | No  | NA | 0     | 1  | Not-determined | Genome-fragment | NA |       | 0     |
| S8-final-viral-combined_k141_85409   | [full]      | 2126   | No  | NA | 0     | 2  | Not-determined | Genome-fragment | NA |       | 0     |
| S8-final-viral-combined_k141_166175  | [full]      | 2213   | No  | NA | 0     | 1  | Not-determined | Genome-fragment | NA |       | 0     |
| S7-final-viral-combined_k141_73358   | [full]      | 11499  | No  | NA | 1     | 5  | Low-quality    | Genome-fragment | NA | 19.81 | 0     |
| S4-final-viral-combined_k141_114312  | [full]      | 15511  | No  | NA | 2     | 0  | Low-quality    | Genome-fragment | NA | 19.22 | 0     |
| S8-final-viral-combined_k141_166415  | [full]      | 1518   | No  | NA | 0     | 0  | Not-determined | Genome-fragment | NA |       | 0     |
| S6_k141_61139                        |             | 15151  | No  | NA | 3     | 0  | Low-quality    | Genome-fragment | NA | 11.44 | 0     |
| S12-final-viral-combined_k141_305384 | [full]      | 11517  | No  | NA | 3     | 2  | Low-quality    | Genome-fragment | NA | 21.92 | 0     |
| S11_k141_170816                      |             | 11528  | No  | NA | 1     | 0  | Low-quality    | Genome-fragment | NA | 12.25 | 0     |
| S2-final-viral-combined_k141_55238   | [full]      | 11543  | No  | NA | 3     | 0  | Low-quality    | Genome-fragment | NA | 30.44 | 0     |
| S8-final-viral-combined_k141_97656   | [full]      | 1544   | No  | NA | 0     | 1  | Not-determined | Genome-fragment | NA |       | 0     |
| S8-final-viral-combined_k141_4710    | [full]      | 7061   | No  | NA | 0     | 6  | Not-determined | Genome-fragment | NA |       | 0     |
| S8-final-viral-combined_k141_85485   | [full]      | 1677   | No  | NA | 0     | 3  | Not-determined | Genome-fragment | NA |       | 0     |
| S8-final-viral-combined_k141_144052  | [full]      | 7035   | No  | NA | 0     | 3  | Not-determined | Genome-fragment | NA |       | 0     |
| S11_k141_247103                      |             | 11551  | No  | NA | 1     | 3  | Low-quality    | Genome-fragment | NA | 18.04 | 0     |
| S8-final-viral-combined_k141_4720    | [full]      | 2067   | No  | NA | 0     | 1  | Not-determined | Genome-fragment | NA |       | 0     |
| S2-final-viral-combined_k141_119820  | [full]      | 11553  | No  | NA | 6     | 0  | Low-quality    | Genome-fragment | NA | 17.89 | 0     |
| S8-final-viral-combined_k141_144080  | [full]      | 1564   | No  | NA | 0     | 0  | Not-determined | Genome-fragment | NA |       | 0     |
| S1-final-viral-combined_k141_180075  | [O_partial] | 115170 | No  | NA | 1     | 4  | Low-quality    | Genome-fragment | NA | 22.77 | 0     |
| S8-final-viral-combined_k141_257546  | [full]      | 5740   | No  | NA | 0     | 3  | Not-determined | Genome-fragment | NA |       | 0     |
| S8-final-viral-combined_k141_74809   | [full]      | 4365   | No  | NA | 0     | 5  | Not-determined | Genome-fragment | NA |       | 0     |
| S17-final-viral-combined_k141_91489  | [full]      | 11574  | No  | NA | 2     | 1  | Low-quality    | Genome-fragment | NA | 25.93 | 0     |
| S8-final-viral-combined_k141_13212   | [full]      | 8319   | No  | NA | 0     | 0  | Not-determined | Genome-fragment | NA |       | 0     |
| S8-final-viral-combined_k141_85501   | [full]      | 14522  | No  | NA | 0     | 8  | Not-determined | Genome-fragment | NA |       | 0     |
| S11-final-viral-combined_k141_187496 | [full]      | 11579  | No  | NA | 2     | 0  | Low-quality    | Genome-fragment | NA | 31.71 | 0     |
| S8-final-viral-combined_k141_97648   | [full]      | 1061   | No  | NA | 0     | 1  | Not-determined | Genome-fragment | NA |       | 0     |
| S12-final-viral-combined_k141_166684 | [O_partial] | 11602  | No  | NA | 1     | 4  | Low-quality    | Genome-fragment | NA | 5.48  | 0     |
| S8-final-viral-combined_k141_155239  | [full]      | 3175   | No  | NA | 0     | 3  | Not-determined | Genome-fragment | NA |       | 0     |
| S8-final-viral-combined_k141_236275  | [full]      | 1484   | No  | NA | 0     | 2  | Not-determined | Genome-fragment | NA |       | 0     |
| S8-final-viral-combined_k141_257581  | [full]      | 2680   | No  | NA | 0     | 1  | Not-determined | Genome-fragment | NA |       | 0     |
| S8-final-viral-combined_k141_166485  | [full]      | 3066   | No  | NA | 0     | 0  | Not-determined | Genome-fragment | NA |       | 0     |
| S8-final-viral-combined_k141_28758   | [full]      | 2978   | No  | NA | 0     | 1  | Not-determined | Genome-fragment | NA |       | 0     |
| S17-final-viral-combined_k141_174905 | [full]      | 11668  | No  | NA | 0     | 0  | Low-quality    | Genome-fragment | NA | 23.15 | 0     |
| S8-final-viral-combined_k141_166488  | [full]      | 7109   | No  | NA | 0     | 2  | Not-determined | Genome-fragment | NA |       | 0     |
| S8-final-viral-combined_k141_270361  | [full]      | 69096  | Yes | NA | 57344 | 12 | High-quality   | High-quality    | NA | 98.49 | 17.01 |
| S8-final-viral-combined_k141_977141  | [full]      | 1410   | No  | NA | 0     | 0  | Not-determined | Genome-fragment | NA |       | 0     |
| S12-final-viral-combined_k141_328463 | [O_partial] | 11612  | No  | NA | 0     | 4  | Low-quality    | Genome-fragment | NA | 40.48 | 0     |
| S7_k141_152900                       |             | 11625  | No  | NA | 5     | 0  | Low-quality    | Genome-fragment | NA | 11.13 | 0     |
| S5-final-viral-combined_k141_120205  | [full]      | 11648  | No  | NA | 7     | 0  | Low-quality    | Genome-fragment | NA | 32.42 | 0     |
| S8-final-viral-combined_k141_4777    | [full]      | 1130   | No  | NA | 0     | 0  | Not-determined | Genome-fragment | NA |       | 0     |
| S1_k141_389114                       |             | 11649  | No  | NA | 1     | 3  | Low-quality    | Genome-fragment | NA | 10.61 | 0     |
| S8-final-viral-combined_k141_108746  | [full]      | 1172   | No  | NA | 0     | 1  | Not-determined | Genome-fragment | NA |       | 0     |
| S2-final-viral-combined_k141_54488   | [full]      | 11649  | No  | NA | 0     | 1  | Low-quality    | Genome-fragment | NA | 6.76  | 0     |
| S12_k141_315563                      |             | 11651  | No  | NA | 5     | 0  | Low-quality    | Genome-fragment | NA | 38.78 | 0     |
| S8-final-viral-combined_k141_85603   | [full]      | 2528   | No  | NA | 0     | 1  | Not-determined | Genome-fragment | NA |       | 0     |
| S8-final-viral-combined_k141_155281  | [full]      | 3813   | No  | NA | 0     | 2  | Not-determined | Genome-fragment | NA |       | 0     |
| S8-final-viral-combined_k141_166515  | [full]      | 4241   | No  | NA | 0     | 2  | Not-determined | Genome-fragment | NA |       | 0     |
| S8-final-viral-combined_k141_85606   | [full]      | 2079   | No  | NA | 0     | 2  | Not-determined | Genome-fragment | NA |       | 0     |
| S8-final-viral-combined_k141_158146  | [full]      | 1937   | No  | NA | 0     | 1  | Not-determined | Genome-fragment | NA |       | 0     |
| S8-final-viral-combined_k141_200168  | [full]      | 78244  | Yes | NA | 60907 | 15 | High-quality   | High-quality    | NA | 100   | 22.16 |
| S17-final-viral-combined_k141_79582  | [full]      | 11653  | No  | NA | 0     | 1  | Low-quality    | Genome-fragment | NA | 18.09 | 0     |
| S8-final-viral-combined_k141_289982  | [full]      | 1728   | No  | NA | 0     | 1  | Not-determined | Genome-fragment | NA |       | 0     |
| S11-final-viral-combined_k141_207161 | [O_partial] | 11657  | Yes | NA | 6453  | 0  | Low-quality    | Genome-fragment | NA | 11.73 | 44.64 |
| S8-final-viral-combined_k141_512641  | [full]      | 2454   | No  | NA | 0     | 2  | Not-determined | Genome-fragment | NA |       | 0     |
| S8-final-viral-combined_k141_240188  | [full]      | 11657  | No  | NA | 6     | 0  | Low-quality    | Genome-fragment | NA | 49.86 | 0     |
| S17-final-viral-combined_k141_73126  | [O_partial] | 11673  | No  | NA | 1     | 1  | Low-quality    | Genome-fragment | NA | 13.9  | 0     |
| S12_k141_183036                      |             | 11673  | No  | NA | 1     | 0  | Low-quality    | Genome-fragment | NA | 12.21 | 0     |
| S8-final-viral-combined_k141_63462   | [full]      | 1110   | No  | NA | 0     | 0  | Not-determined | Genome-fragment | NA |       | 0     |
| S8-final-viral-combined_k141_51302   | [full]      | 2070   | No  | NA | 0     | 0  | Not-determined | Genome-fragment | NA |       | 0     |
| S1-final-viral-combined_k141_7641    | [full]      | 1164   | No  | NA | 5     | 0  | Low-quality    | Genome-fragment | NA |       | 0     |
| S1-final-viral-combined_k141_7641    | [full]      | 11687  | No  | NA | 5     | 0  | Low-quality    | Genome-fragment | NA | 28.43 | 0     |
| S8-final-viral-combined_k141_270448  | [full]      | 9983   | No  | NA | 0     | 6  | Not-determined | Genome-fragment | NA |       | 0     |
| S8-final-viral-combined_k141_179179  | [full]      | 3518   | No  | NA | 0     | 2  | Not-determined | Genome-fragment | NA |       | 0     |
| S8-final-viral-combined_k141_270455  | [full]      | 1512   | No  | NA | 0     | 0  | Not-determined | Genome-fragment | NA |       | 0     |
| S1-final-viral-combined_k141_148231  | [full]      | 11692  | Yes | NA | 8275  | 2  | Low-quality    | Genome-fragment | NA | 22.04 | 29.23 |
| S8-final-viral-combined_k141_166463  | [full]      | 211    | No  | NA | 0     | 1  | Not-determined | Genome-fragment | NA |       | 0     |
| S8-final-viral-combined_k141_120402  | [full]      | 2254   | No  | NA | 0     | 3  | Not-determined | Genome-fragment | NA |       | 0     |
| S1_k141_340458                       |             | 11692  | No  | NA | 4     | 0  | Low-quality    | Genome-fragment | NA | 14.54 | 0     |
| S8-final-viral-combined_k141_4887    | [full]      | 1144   | No  | NA | 0     | 0  | Not-determined | Genome-fragment | NA |       | 0     |
| S1-final-viral-combined_k141_33421   | [full]      | 11694  | No  | NA | 1     | 1  | Low-quality    | Genome-fragment | NA | 24.25 | 0     |
| S12-final-viral-combined_k141_17521  | [full]      | 11697  | No  | NA | 1     | 5  | Low-quality    | Genome-fragment | NA | 12.63 | 0     |
| S12_k141_372961                      |             | 11704  | No  | NA | 0     | 5  | Low-quality    | Genome-fragment | NA | 17.71 | 0     |
| S8-final-viral-combined_k141_179485  | [full]      | 1128   | No  | NA | 0     | 1  | Not-determined | Genome-fragment | NA |       | 0     |
| S8-final-viral-combined_k141_270470  | [full]      | 3380   | No  | NA | 0     | 0  | Not-determined | Genome-fragment | NA |       | 0     |
| S8-final-viral-combined_k141_257726  | [full]      | 7180   | No  | NA | 0     | 6  | Not-determined | Genome-fragment | NA |       | 0     |
| S8-final-viral-combined_k141_166651  | [full]      | 1061   | No  | NA | 0     | 1  | Not-determined | Genome-fragment | NA |       | 0     |
| S8-final-viral-combined_k141_270482  | [full]      | 1116   | No  | NA | 0</   |    |                |                 |    |       |       |



|                                      |             |       |     |       |    |    |                |                 |    |       |       |
|--------------------------------------|-------------|-------|-----|-------|----|----|----------------|-----------------|----|-------|-------|
| S11-final-viral-combined_k141_87230  | [full]      | 11865 | No  | NA    | 0  | 7  | Low-quality    | Genome-fragment | NA | 10.98 | 0     |
| S8-final-viral-combined_k141_200436  | [full]      | 2628  | No  | NA    | 1  | 1  | Not-determined | Genome-fragment | NA | 0     | 0     |
| S11-final-viral-combined_k141_219612 | [full]      | 11865 | No  | NA    | 2  | 0  | Low-quality    | Genome-fragment | NA | 13.55 | 0     |
| S8-final-viral-combined_k141_200478  | [full]      | 2844  | No  | NA    | 0  | 1  | Not-determined | Genome-fragment | NA | 0     | 0     |
| S11-final-viral-combined_k141_244214 | [full]      | 11873 | No  | NA    | 13 | 0  | Low-quality    | Genome-fragment | NA | 29.4  | 0     |
| S8-final-viral-combined_k141_40538   | [full]      | 1871  | No  | NA    | 0  | 2  | Not-determined | Genome-fragment | NA | 0     | 0     |
| S2-final-viral-combined_k141_115553  | [full]      | 11874 | Yes | 8512  | 2  | 3  | Low-quality    | Genome-fragment | NA | 18.43 | 28.31 |
| S2-final-viral-combined_k141_180380  | [full]      | 11875 | No  | NA    | 9  | 0  | Low-quality    | Genome-fragment | NA | 30.33 | 0     |
| S8-final-viral-combined_k141_190384  | [full]      | 3164  | No  | NA    | 1  | 1  | Not-determined | Genome-fragment | NA | 0     | 0     |
| S5-final-viral-combined_k141_103844  | [full]      | 11879 | No  | NA    | 10 | 0  | Low-quality    | Genome-fragment | NA | 32.49 | 0     |
| S8-final-viral-combined_k141_155656  | [full]      | 1747  | No  | NA    | 0  | 1  | Not-determined | Genome-fragment | NA | 0     | 0     |
| S12-final-viral-combined_k141_141211 | [full]      | 11883 | Yes | 4812  | 1  | 4  | Low-quality    | Genome-fragment | NA | 23.07 | 59.51 |
| S8-final-viral-combined_k141_75098   | [full]      | 2047  | No  | NA    | 0  | 1  | Not-determined | Genome-fragment | NA | 0     | 0     |
| S8-final-viral-combined_k141_179484  | [full]      | 2147  | No  | NA    | 0  | 2  | Not-determined | Genome-fragment | NA | 0     | 0     |
| S8-final-viral-combined_k141_155691  | [full]      | 1476  | No  | NA    | 0  | 1  | Not-determined | Genome-fragment | NA | 0     | 0     |
| S12-final-viral-combined_k141_168418 | [full]      | 11887 | No  | NA    | 6  | 0  | Low-quality    | Genome-fragment | NA | 20.21 | 0     |
| S8-final-viral-combined_k141_236715  | [full]      | 1799  | No  | NA    | 0  | 2  | Not-determined | Genome-fragment | NA | 0     | 0     |
| S8-final-viral-combined_k141_75139   | [full]      | 2931  | No  | NA    | 0  | 2  | Not-determined | Genome-fragment | NA | 0     | 0     |
| S8-final-viral-combined_k141_224590  | [full]      | 1719  | No  | NA    | 0  | 2  | Not-determined | Genome-fragment | NA | 0     | 0     |
| S8-final-viral-combined_k141_270881  | [full]      | 10307 | No  | NA    | 0  | 0  | Not-determined | Genome-fragment | NA | 0     | 0     |
| S8-final-viral-combined_k141_155722  | [full]      | 5869  | No  | NA    | 0  | 0  | Not-determined | Genome-fragment | NA | 0     | 0     |
| S8-final-viral-combined_k141_247976  | [full]      | 1066  | No  | NA    | 0  | 2  | Not-determined | Genome-fragment | NA | 0     | 0     |
| S8-final-viral-combined_k141_109016  | [full]      | 1084  | No  | NA    | 0  | 0  | Not-determined | Genome-fragment | NA | 0     | 0     |
| S8-final-viral-combined_k141_5261    | [full]      | 1106  | No  | NA    | 0  | 0  | Not-determined | Genome-fragment | NA | 0     | 0     |
| S8-final-viral-combined_k141_224419  | [full]      | 2275  | No  | NA    | 0  | 0  | Not-determined | Genome-fragment | NA | 0     | 0     |
| S1-final-viral-combined_k141_164281  | [full]      | 11888 | No  | NA    | 1  | 0  | Low-quality    | Genome-fragment | NA | 7.69  | 0     |
| S12-final-viral-combined_k141_6507   | [full]      | 11901 | No  | NA    | 0  | 3  | Low-quality    | Genome-fragment | NA | 7.65  | 0     |
| S8-final-viral-combined_k141_155748  | [full]      | 3198  | No  | NA    | 0  | 1  | Not-determined | Genome-fragment | NA | 0     | 0     |
| S5-final-viral-combined_k141_201140  | [full]      | 11904 | No  | NA    | 0  | 0  | Low-quality    | Genome-fragment | NA | 4.6   | 0     |
| S8-final-viral-combined_k141_75205   | [full]      | 8404  | No  | NA    | 1  | 8  | Not-determined | Genome-fragment | NA | 0     | 0     |
| S9_k141_30206                        |             | 11907 | No  | NA    | 0  | 6  | Low-quality    | Genome-fragment | NA | 3.14  | 0     |
| S4-final-viral-combined_k141_67066   | [full]      | 11913 | No  | NA    | 5  | 0  | Low-quality    | Genome-fragment | NA | 23.51 | 0     |
| S8-final-viral-combined_k141_63775   | [full]      | 1848  | No  | NA    | 0  | 2  | Not-determined | Genome-fragment | NA | 0     | 0     |
| S8-final-viral-combined_k141_270947  | [full]      | 2969  | No  | NA    | 0  | 2  | Not-determined | Genome-fragment | NA | 0     | 0     |
| S8-final-viral-combined_k141_270949  | [full]      | 5148  | No  | NA    | 0  | 6  | Not-determined | Genome-fragment | NA | 0     | 0     |
| S8-final-viral-combined_k141_155802  | [full]      | 2888  | No  | NA    | 0  | 0  | Not-determined | Genome-fragment | NA | 0     | 0     |
| S8-final-viral-combined_k141_29533   | [full]      | 1195  | No  | NA    | 0  | 1  | Not-determined | Genome-fragment | NA | 0     | 0     |
| S11-final-viral-combined_k141_228673 | [full]      | 11926 | No  | NA    | 0  | 9  | Low-quality    | Genome-fragment | NA | 2.88  | 0     |
| S8-final-viral-combined_k141_179612  | [full]      | 1363  | No  | NA    | 0  | 0  | Not-determined | Genome-fragment | NA | 0     | 0     |
| S2_k141_67277                        |             | 11942 | No  | NA    | 1  | 0  | Low-quality    | Genome-fragment | NA | 9.24  | 0     |
| S8-final-viral-combined_k141_179622  | [full]      | 1806  | No  | NA    | 0  | 1  | Not-determined | Genome-fragment | NA | 0     | 0     |
| S12-final-viral-combined_k141_24247  | [full]      | 11945 | No  | NA    | 0  | 0  | Low-quality    | Genome-fragment | NA | 19.98 | 0     |
| S8-final-viral-combined_k141_248107  | [full]      | 2084  | No  | NA    | 0  | 1  | Not-determined | Genome-fragment | NA | 0     | 0     |
| S11_k141_265514                      |             | 11949 | No  | NA    | 0  | 0  | Low-quality    | Genome-fragment | NA | 12.7  | 0     |
| S11-final-viral-combined_k141_162851 | [full]      | 11953 | No  | NA    | 3  | 0  | Low-quality    | Genome-fragment | NA | 18.66 | 0     |
| S8-final-viral-combined_k141_179655  | [full]      | 2097  | No  | NA    | 0  | 7  | Not-determined | Genome-fragment | NA | 0     | 0     |
| S8-final-viral-combined_k141_155871  | [full]      | 1347  | No  | NA    | 0  | 0  | Not-determined | Genome-fragment | NA | 0     | 0     |
| S12-final-viral-combined_k141_290363 | [full]      | 11953 | No  | NA    | 1  | 2  | Low-quality    | Genome-fragment | NA | 8.61  | 0     |
| S8-final-viral-combined_k141_15895   | [full]      | 1096  | No  | NA    | 0  | 0  | Not-determined | Genome-fragment | NA | 0     | 0     |
| S8-final-viral-combined_k141_40666   | [full]      | 71582 | Yes | 23651 | 5  | 21 | Medium-quality | Genome-fragment | NA | 60.72 | 66.96 |
| S12_k141_103755                      |             | 11955 | No  | NA    | 0  | 9  | Low-quality    | Genome-fragment | NA | 5.13  | 0     |
| S2-final-viral-combined_k141_12309   | [full]      | 11955 | No  | NA    | 0  | 0  | Low-quality    | Genome-fragment | NA | 32.64 | 0     |
| S8-final-viral-combined_k141_109169  | [full]      | 3246  | No  | NA    | 0  | 2  | Not-determined | Genome-fragment | NA | 0     | 0     |
| S5-final-viral-combined_k141_133589  | [full]      | 11963 | No  | NA    | 3  | 0  | Low-quality    | Genome-fragment | NA | 7.78  | 0     |
| S17-final-viral-combined_k141_225271 | [full]      | 11963 | No  | NA    | 7  | 0  | Low-quality    | Genome-fragment | NA | 32.82 | 0     |
| S12-final-viral-combined_k141_191231 | [full]      | 11971 | No  | NA    | 5  | 0  | Low-quality    | Genome-fragment | NA | 26.79 | 0     |
| S8-final-viral-combined_k141_75325   | [full]      | 1587  | No  | NA    | 0  | 1  | Not-determined | Genome-fragment | NA | 0     | 0     |
| S12-final-viral-combined_k141_51696  | [full]      | 11983 | No  | NA    | 3  | 0  | Low-quality    | Genome-fragment | NA | 27.11 | 0     |
| S8-final-viral-combined_k141_16735   | [full]      | 4987  | No  | NA    | 0  | 2  | Not-determined | Genome-fragment | NA | 0     | 0     |
| S4_k141_135748                       |             | 11984 | No  | NA    | 0  | 9  | Low-quality    | Genome-fragment | NA | 7.62  | 0     |
| S8-final-viral-combined_k141_144352  | [full]      | 2280  | No  | NA    | 0  | 0  | Not-determined | Genome-fragment | NA | 0     | 0     |
| S8-final-viral-combined_k141_120920  | [full]      | 2246  | No  | NA    | 0  | 2  | Not-determined | Genome-fragment | NA | 0     | 0     |
| S8-final-viral-combined_k141_63876   | [full]      | 3998  | No  | NA    | 0  | 0  | Not-determined | Genome-fragment | NA | 0     | 0     |
| S8-final-viral-combined_k141_155955  | [full]      | 1964  | No  | NA    | 0  | 3  | Not-determined | Genome-fragment | NA | 0     | 0     |
| S8-final-viral-combined_k141_86189   | [full]      | 1921  | No  | NA    | 0  | 1  | Not-determined | Genome-fragment | NA | 0     | 0     |
| S8-final-viral-combined_k141_236915  | [full]      | 4270  | No  | NA    | 0  | 1  | Not-determined | Genome-fragment | NA | 0     | 0     |
| S8-final-viral-combined_k141_16385   | [full]      | 2678  | No  | NA    | 0  | 3  | Not-determined | Genome-fragment | NA | 0     | 0     |
| S8-final-viral-combined_k141_271016  | [full]      | 1153  | No  | NA    | 0  | 0  | Not-determined | Genome-fragment | NA | 0     | 0     |
| S2-final-viral-combined_k141_240746  | [full]      | 11985 | No  | NA    | 0  | 1  | Low-quality    | Genome-fragment | NA | 3.8   | 0     |
| S8-final-viral-combined_k141_248226  | [full]      | 2153  | No  | NA    | 0  | 2  | Not-determined | Genome-fragment | NA | 0     | 0     |
| S12_k141_253656                      |             | 11994 | No  | NA    | 0  | 7  | Low-quality    | Genome-fragment | NA | 11.24 | 0     |
| S3-final-viral-combined_k141_121752  | [full]      | 11999 | No  | NA    | 0  | 1  | Low-quality    | Genome-fragment | NA | 13.87 | 0     |
| S8-final-viral-combined_k141_271034  | [full]      | 10200 | No  | NA    | 0  | 7  | Not-determined | Genome-fragment | NA | 0     | 0     |
| S17-final-viral-combined_k141_31510  | [full]      | 12006 | No  | NA    | 2  | 0  | Low-quality    | Genome-fragment | NA | 8.32  | 0     |
| S8-final-viral-combined_k141_132865  | [full]      | 1660  | No  | NA    | 0  | 0  | Not-determined | Genome-fragment | NA | 0     | 0     |
| S4-final-viral-combined_k141_126313  | [full]      | 12006 | No  | NA    | 9  | 0  | Low-quality    | Genome-fragment | NA | 25.11 | 0     |
| S8-final-viral-combined_k141_144418  | [full]      | 1742  | No  | NA    | 0  | 1  | Not-determined | Genome-fragment | NA | 0     | 0     |
| S4_k141_76784                        |             | 12016 | No  | NA    | 6  | 0  | Low-quality    | Genome-fragment | NA | 40.62 | 0     |
| S6-final-viral-combined_k141_177996  | [0_partial] | 12015 | No  | NA    | 0  | 1  | Low-quality    | Genome-fragment | NA | 15.88 | 0     |
| S2-final-viral-combined_k141_64099   | [full]      | 12026 | No  | NA    | 6  | 0  | Low-quality    | Genome-fragment | NA | 34.2  | 0     |
| S8-final-viral-combined_k141_16440   | [full]      | 2457  | No  | NA    | 0  | 0  | Not-determined | Genome-fragment | NA | 0     | 0     |
| S8-final-viral-combined_k141_132941  | [full]      | 2595  | No  | NA    | 0  | 2  | Not-determined | Genome-fragment | NA | 0     | 0     |
| S7-final-viral-combined_k141_142495  | [full]      | 12030 | No  | NA    | 3  | 0  | Low-quality    | Genome-fragment | NA | 26.68 | 0     |
| S8-final-viral-combined_k141_29729   | [full]      | 2750  | No  | NA    | 0  | 0  | Not-determined | Genome-fragment | NA | 0     | 0     |
| S8-final-viral-combined_k141_244457  | [full]      | 1122  | No  | NA    | 0  | 1  | Not-determined | Genome-fragment | NA | 0     | 0     |
| S8-final-viral-combined_k141_179815  | [full]      | 2121  | No  | NA    | 0  | 1  | Not-determined | Genome-fragment | NA | 0     | 0     |
| S8-final-viral-combined_k141_16455   | [full]      | 13670 | No  | NA    | 0  | 5  | Not-determined | Genome-fragment | NA | 0     | 0     |
| S8-final-viral-combined_k141_224776  | [full]      | 2585  | No  | NA    | 0  | 1  | Not-determined | Genome-fragment | NA | 0     | 0     |
| S8-final-viral-combined_k141_86227   | [full]      | 1573  | No  | NA    | 0  | 3  | Not-determined | Genome-fragment | NA | 0     | 0     |
| S8-final-viral-combined_k141_190587  | [full]      | 1894  | No  | NA    | 0  | 0  | Not-determined | Genome-fragment | NA | 0     | 0     |
| S8-final-viral-combined_k141_271099  | [full]      | 2487  | No  | NA    | 0  | 3  | Not-determined | Genome-fragment | NA | 0     | 0     |
| S12-final-viral-combined_k141_51479  | [full]      | 12011 | Yes | 5514  | 0  | 1  | Low-quality    | Genome-fragment | NA | 12.33 | 54.17 |
| S11-final-viral-combined_k141_27722  | [full]      | 12036 | No  | NA    | 2  | 8  | Low-quality    | Genome-fragment | NA | 5.9   | 0     |
| S8-final-viral-combined_k141_121041  | [full]      | 2082  | No  | NA    | 0  | 2  | Not-determined | Genome-fragment | NA | 0     | 0     |
| S8-final-viral-combined_k141_224786  | [full]      | 2736  | No  | NA    | 0  | 0  | Not-determined | Genome-fragment | NA | 0     | 0     |
| S9-final-viral-combined_k141_95436   | [full]      | 12063 | No  | NA    | 5  | 0  | Low-quality    | Genome-fragment | NA | 26.11 | 0     |
| S12_k141_286243                      |             | 12063 | No  | NA    | 1  | 0  | Low-quality    | Genome-fragment | NA | 26.07 | 0     |
| S4_k141_20596                        |             | 12064 | No  | NA    | 0  | 6  | Low-quality    | Genome-fragment | NA | 7.81  | 0     |
| S8-final-viral-combined_k141_1580    | [full]      | 6017  | No  | NA    | 0  | 1  | Not-determined | Genome-fragment | NA | 0     | 0     |
| S8-final-viral-combined_k141_75433   | [full]      | 1274  | No  | NA    | 0  | 1  | Not-determined | Genome-fragment | NA | 0     | 0     |
| S8-final-viral-combined_k141_237129  | [full]      | 4857  | No  | NA    | 0  | 2  | Not-determined | Genome-fragment | NA | 0     | 0     |
| S4_k141_132725                       |             | 12084 | No  | NA    | 0  | 1  | Low-quality    | Genome-fragment | NA | 8.36  | 0     |
| S2_k141_179922                       |             | 12088 | Yes | 3217  | 1  | 3  | Low-quality    | Genome-fragment | NA | 5.73  | 73.39 |
| S8-final-viral-combined_k141_190638  | [full]      | 1135  | No  | NA    | 0  | 0  | Not-determined | Genome-fragment | NA | 0     | 0     |
| S8-final-viral-combined_k141_156027  | [full]      | 3683  | No  | NA    | 0  | 3  | Not-determined | Genome-fragment | NA | 0     | 0     |
| S8-final-viral-combined_k141_109423  | [full]      | 8236  | No  | NA    | 0  | 8  | Not-determined | Genome-fragment | NA | 0     | 0     |
| S8-final-viral-combined_k141_167439  | [full]      | 1387  | No  | NA    | 0  | 0  | Not-determined | Genome-fragment | NA | 0     | 0     |
| S12_k141_241630                      |             | 12092 | No  | NA    | 1  | 4  | Low-quality    | Genome-fragment | NA | 11.35 | 0     |
| S5_k141_115698                       |             | 12097 | No  | NA    | 7  | 0  | Low-quality    | Genome-fragment | NA | 19.72 | 0     |
| S8-final-viral-combined_k141_167449  | [full]      | 2838  | No  | NA    | 0  | 2  | Not-determined | Genome-fragment | NA | 0     | 0     |
| S8-final-viral-combined_k141_244898  | [full]      | 1092  | No  | NA    | 0  | 0  | Not-determined | Genome-fragment | NA | 0     | 0     |
| S8-final-viral-combined_k141_156050  | [full]      | 8746  | No  | NA    | 0  | 1  | Not-determined | Genome-fragment | NA | 0     | 0     |
| S5_k141_135457                       |             | 12109 | No  | NA    | 1  | 1  | Low-quality    | Genome-fragment | NA | 26.98 | 0     |
| S8-final-viral-combined_k141_166096  | [full]      | 1266  | No  | NA    | 0  | 1  | Not-determined | Genome-fragment | NA | 0     | 0     |
| S8-final-viral-combined_k141_167487  | [full]      | 3421  | No  | NA    | 0  | 2  | Not-determined | Genome-fragment | NA | 0     | 0     |
| S9-final-viral-combined_k141_57695   | [0_partial] | 12111 | No  | NA    | 1  | 2  | Low-quality    | Genome-fragment | NA | 8.14  | 0     |
| S8-final-viral-combined_k141_200920  | [full]      | 2929  | No  | NA    | 0  | 2  | Not-determined | Genome-fragment | NA | 0     | 0     |
| S12-final-viral-combined_k141_352665 | [full]      | 12115 | No  | NA    | 1  | 9  | Low-quality    | Genome-fragment | NA | 14    | 0     |
| S1_k141_17290                        |             | 12120 | No  | NA    | 0  | 0  | Low-quality    | Genome-fragment | NA | 8.34  | 0     |
| S8-final-viral-combined_k141_258257  | [full]      | 2149  | No  | NA    | 0  | 2  | Not-determined | Genome-fragment | NA | 0     | 0     |
| S2-final-viral-combined_k141_114092  | [full]      | 12133 | No  | NA    | 6  | 0  | Low-quality    | Genome-fragment | NA | 23.57 | 0     |
| S17_k141_112295                      |             | 12141 | No  | NA    | 0  |    |                |                 |    |       |       |



|                                      |             |       |     |      |    |    |                |                 |       |       |
|--------------------------------------|-------------|-------|-----|------|----|----|----------------|-----------------|-------|-------|
| S8-final-viral-combined_k141_2714221 | [full]      | 2120  | No  | NA   | 0  | 2  | Not-determined | Genome-fragment | NA    | 0     |
| S8-final-viral-combined_k141_245389  | [full]      | 3229  | No  | NA   | 0  | 2  | Not-determined | Genome-fragment | NA    | 0     |
| S8-final-viral-combined_k141_5829    | [full]      | 1331  | No  | NA   | 0  | 1  | Not-determined | Genome-fragment | NA    | 0     |
| S12-final-viral-combined_k141_836    | [full]      | 12263 | No  | NA   | 1  | 1  | Low-quality    | Genome-fragment | 18.56 | 0     |
| S12-final-viral-combined_k141_319588 | [full]      | 12264 | No  | NA   | 8  | 0  | Low-quality    | Genome-fragment | 20.44 | 0     |
| S1-final-viral-combined_k141_22044   | [full]      | 12270 | No  | NA   | 4  | 0  | Low-quality    | Genome-fragment | 11.63 | 0     |
| S8-final-viral-combined_k141_258477  | [full]      | 1503  | No  | NA   | 0  | 1  | Not-determined | Genome-fragment | NA    | 0     |
| S8-final-viral-combined_k141_121444  | [full]      | 1785  | No  | NA   | 0  | 0  | Not-determined | Genome-fragment | NA    | 0     |
| S8-final-viral-combined_k141_248637  | [full]      | 2014  | No  | NA   | 0  | 0  | Not-determined | Genome-fragment | NA    | 0     |
| S8-final-viral-combined_k141_75850   | [full]      | 3300  | No  | NA   | 0  | 2  | Not-determined | Genome-fragment | NA    | 0     |
| S11-final-viral-combined_k141_110390 | [full]      | 12276 | No  | NA   | 1  | 5  | Low-quality    | Genome-fragment | 8.25  | 0     |
| S8-final-viral-combined_k141_180279  | [full]      | 4448  | No  | NA   | 0  | 3  | Not-determined | Genome-fragment | NA    | 0     |
| S8-final-viral-combined_k141_156301  | [full]      | 2529  | No  | NA   | 0  | 3  | Not-determined | Genome-fragment | NA    | 0     |
| S5-final-viral-combined_k141_133189  | [full]      | 12281 | No  | NA   | 1  | 8  | Low-quality    | Genome-fragment | 20.36 | 0     |
| S8-final-viral-combined_k141_186622  | [full]      | 1725  | No  | NA   | 0  | 1  | Not-determined | Genome-fragment | NA    | 0     |
| S8-final-viral-combined_k141_109761  | [full]      | 2675  | No  | NA   | 0  | 0  | Not-determined | Genome-fragment | NA    | 0     |
| S8-final-viral-combined_k141_52477   | [full]      | 2302  | No  | NA   | 0  | 0  | Not-determined | Genome-fragment | NA    | 0     |
| S8-final-viral-combined_k141_107766  | [full]      | 2342  | No  | NA   | 0  | 0  | Not-determined | Genome-fragment | NA    | 0     |
| S8-final-viral-combined_k141_144075  | [full]      | 1128  | No  | NA   | 0  | 0  | Not-determined | Genome-fragment | NA    | 0     |
| S17-final-viral-combined_k141_133121 | [full]      | 12281 | No  | NA   | 7  | 1  | Low-quality    | Genome-fragment | 18.8  | 0     |
| S8-final-viral-combined_k141_186611  | [full]      | 1844  | No  | NA   | 0  | 1  | Not-determined | Genome-fragment | NA    | 0     |
| S1-final-viral-combined_k141_105013  | [full]      | 12283 | No  | NA   | 3  | 0  | Low-quality    | Genome-fragment | 32.25 | 0     |
| S5-final-viral-combined_k141_178725  | [full]      | 12290 | No  | NA   | 7  | 0  | Low-quality    | Genome-fragment | 26.09 | 0     |
| S8_k141_67145                        |             | 12293 | No  | NA   | 3  | 0  | Low-quality    | Genome-fragment | 12.87 | 0     |
| S3-final-viral-combined_k141_10000   | [full]      | 12295 | No  | NA   | 6  | 0  | Low-quality    | Genome-fragment | 21.36 | 0     |
| S8-final-viral-combined_k141_271528  | [full]      | 5984  | No  | NA   | 0  | 2  | Not-determined | Genome-fragment | NA    | 0     |
| S8-final-viral-combined_k141_213694  | [full]      | 10065 | No  | NA   | 0  | 4  | Not-determined | Genome-fragment | NA    | 0     |
| S8-final-viral-combined_k141_237494  | [full]      | 15991 | No  | NA   | 0  | 10 | Not-determined | Genome-fragment | NA    | 0     |
| S8-final-viral-combined_k141_11388   | [full]      | 3787  | No  | NA   | 0  | 0  | Not-determined | Genome-fragment | NA    | 0     |
| S8-final-viral-combined_k141_201327  | [full]      | 1105  | No  | NA   | 0  | 1  | Not-determined | Genome-fragment | NA    | 0     |
| S8-final-viral-combined_k141_180382  | [full]      | 1064  | No  | NA   | 0  | 1  | Not-determined | Genome-fragment | NA    | 0     |
| S8-final-viral-combined_k141_201361  | [full]      | 2511  | No  | NA   | 0  | 0  | Not-determined | Genome-fragment | NA    | 0     |
| S8-final-viral-combined_k141_248719  | [full]      | 1718  | No  | NA   | 0  | 2  | Not-determined | Genome-fragment | NA    | 0     |
| S8-final-viral-combined_k141_225268  | [full]      | 1556  | No  | NA   | 0  | 1  | Not-determined | Genome-fragment | NA    | 0     |
| S5-final-viral-combined_k141_124504  | [O_partial] | 12298 | Yes | 6755 | 2  | 3  | Low-quality    | Genome-fragment | 9.85  | 45.07 |
| S8-final-viral-combined_k141_201166  | [full]      | 2110  | No  | NA   | 0  | 0  | Not-determined | Genome-fragment | NA    | 0     |
| S8-final-viral-combined_k141_167869  | [full]      | 2843  | No  | NA   | 0  | 1  | Not-determined | Genome-fragment | NA    | 0     |
| S8-final-viral-combined_k141_201367  | [full]      | 1873  | No  | NA   | 0  | 1  | Not-determined | Genome-fragment | NA    | 0     |
| S8-final-viral-combined_k141_258781  | [full]      | 1359  | No  | NA   | 0  | 1  | Not-determined | Genome-fragment | NA    | 0     |
| S8-final-viral-combined_k141_133466  | [full]      | 12489 | No  | NA   | 0  | 9  | Not-determined | Genome-fragment | NA    | 0     |
| S8-final-viral-combined_k141_75963   | [full]      | 1208  | No  | NA   | 0  | 1  | Not-determined | Genome-fragment | NA    | 0     |
| S1-final-viral-combined_k141_128375  | [full]      | 12300 | No  | NA   | 0  | 0  | Low-quality    | Genome-fragment | 25.87 | 0     |
| S8-final-viral-combined_k141_225299  | [full]      | 1614  | No  | NA   | 0  | 0  | Not-determined | Genome-fragment | NA    | 0     |
| S8-final-viral-combined_k141_145084  | [full]      | 6301  | No  | NA   | 0  | 5  | Not-determined | Genome-fragment | NA    | 0     |
| S5-final-viral-combined_k141_155082  | [O_partial] | 12307 | No  | NA   | 1  | 3  | Low-quality    | Genome-fragment | 31.28 | 0     |
| S8-final-viral-combined_k141_16000   | [full]      | 4066  | No  | NA   | 0  | 1  | Not-determined | Genome-fragment | NA    | 0     |
| S8-final-viral-combined_k141_302241  | [full]      | 3730  | No  | NA   | 0  | 1  | Not-determined | Genome-fragment | NA    | 0     |
| S1_k141_311018                       |             | 12312 | No  | NA   | 13 | 0  | Low-quality    | Genome-fragment | 27.12 | 0     |
| S8-final-viral-combined_k141_145138  | [full]      | 1008  | No  | NA   | 0  | 1  | Not-determined | Genome-fragment | NA    | 0     |
| S8-final-viral-combined_k141_191048  | [full]      | 2003  | No  | NA   | 0  | 0  | Not-determined | Genome-fragment | NA    | 0     |
| S8-final-viral-combined_k141_30234   | [full]      | 1208  | No  | NA   | 0  | 2  | Not-determined | Genome-fragment | NA    | 0     |
| S5-final-viral-combined_k141_23929   | [O_partial] | 12318 | Yes | 9210 | 2  | 4  | Low-quality    | Genome-fragment | 6.23  | 25.29 |
| S8-final-viral-combined_k141_237584  | [full]      | 1489  | No  | NA   | 0  | 2  | Not-determined | Genome-fragment | NA    | 0     |
| S8-final-viral-combined_k141_213858  | [full]      | 2037  | No  | NA   | 0  | 0  | Not-determined | Genome-fragment | NA    | 0     |
| S11-final-viral-combined_k141_148271 | [full]      | 22341 | No  | NA   | 5  | 0  | Low-quality    | Genome-fragment | 20.36 | 0     |
| S8-final-viral-combined_k141_137861  | [full]      | 1795  | No  | NA   | 0  | 0  | Not-determined | Genome-fragment | NA    | 0     |
| S17-final-viral-combined_k141_42139  | [full]      | 12341 | No  | NA   | 3  | 0  | Low-quality    | Genome-fragment | 31.31 | 0     |
| S8-final-viral-combined_k141_225410  | [full]      | 2471  | No  | NA   | 0  | 3  | Not-determined | Genome-fragment | NA    | 0     |
| S8-final-viral-combined_k141_213876  | [full]      | 2863  | No  | NA   | 0  | 4  | Not-determined | Genome-fragment | NA    | 0     |
| S8-final-viral-combined_k141_271684  | [full]      | 2918  | No  | NA   | 0  | 1  | Not-determined | Genome-fragment | NA    | 0     |
| S8-final-viral-combined_k141_41551   | [full]      | 6041  | No  | NA   | 0  | 3  | Not-determined | Genome-fragment | NA    | 0     |
| S8-final-viral-combined_k141_191101  | [full]      | 1297  | No  | NA   | 0  | 2  | Not-determined | Genome-fragment | NA    | 0     |
| S8-final-viral-combined_k141_98929   | [full]      | 5762  | No  | NA   | 0  | 3  | Not-determined | Genome-fragment | NA    | 0     |
| S8-final-viral-combined_k141_110007  | [full]      | 3163  | No  | NA   | 0  | 0  | Not-determined | Genome-fragment | NA    | 0     |
| S8-final-viral-combined_k141_110009  | [full]      | 1278  | No  | NA   | 0  | 0  | Not-determined | Genome-fragment | NA    | 0     |
| S12-final-viral-combined_k141_393497 | [full]      | 12359 | No  | NA   | 1  | 7  | Low-quality    | Genome-fragment | 20.85 | 0     |
| S11_k141_208877                      |             | 12368 | No  | NA   | 3  | 0  | Low-quality    | Genome-fragment | 13.18 | 0     |
| S8-final-viral-combined_k141_133599  | [full]      | 1244  | No  | NA   | 0  | 0  | Not-determined | Genome-fragment | NA    | 0     |
| S8-final-viral-combined_k141_237616  | [full]      | 2002  | No  | NA   | 0  | 2  | Not-determined | Genome-fragment | NA    | 0     |
| S11-final-viral-combined_k141_97207  | [full]      | 12379 | No  | NA   | 1  | 5  | Low-quality    | Genome-fragment | 7.84  | 0     |
| S8-final-viral-combined_k141_156563  | [full]      | 4466  | No  | NA   | 0  | 4  | Not-determined | Genome-fragment | NA    | 0     |
| S8-final-viral-combined_k141_23909   | [full]      | 12386 | No  | NA   | 0  | 0  | Low-quality    | Genome-fragment | 17.44 | 0     |
| S8-final-viral-combined_k141_168032  | [full]      | 3106  | No  | NA   | 0  | 2  | Not-determined | Genome-fragment | NA    | 0     |
| S5-final-viral-combined_k141_191791  | [O_partial] | 12415 | No  | NA   | 0  | 5  | Low-quality    | Genome-fragment | 30.57 | 0     |
| S7-final-viral-combined_k141_4932    | [full]      | 12415 | Yes | NA   | 0  | 0  | Low-quality    | Genome-fragment | 32.81 | 0     |
| S11-final-viral-combined_k141_273104 | [full]      | 12430 | No  | NA   | 5  | 0  | Low-quality    | Genome-fragment | 27.1  | 0     |
| S8-final-viral-combined_k141_201513  | [full]      | 1521  | No  | NA   | 0  | 1  | Not-determined | Genome-fragment | NA    | 0     |
| S8-final-viral-combined_k141_18689   | [full]      | 4440  | No  | NA   | 0  | 3  | Not-determined | Genome-fragment | NA    | 0     |
| S8-final-viral-combined_k141_76073   | [full]      | 6507  | No  | NA   | 0  | 2  | Not-determined | Genome-fragment | NA    | 0     |
| S8-final-viral-combined_k141_6145    | [full]      | 1644  | No  | NA   | 0  | 1  | Not-determined | Genome-fragment | NA    | 0     |
| S8-final-viral-combined_k141_213967  | [full]      | 2051  | No  | NA   | 0  | 1  | Not-determined | Genome-fragment | NA    | 0     |
| S2-final-viral-combined_k141_14289   | [full]      | 12432 | No  | NA   | 1  | 2  | Low-quality    | Genome-fragment | 8.97  | 0     |
| S8-final-viral-combined_k141_41580   | [full]      | 9068  | No  | NA   | 1  | 0  | Not-determined | Genome-fragment | NA    | 0     |
| S1-final-viral-combined_k141_38210   | [full]      | 12464 | No  | NA   | 3  | 1  | Low-quality    | Genome-fragment | 20.14 | 0     |
| S8-final-viral-combined_k141_236044  | [O_partial] | 12467 | No  | NA   | 1  | 3  | Low-quality    | Genome-fragment | 32.65 | 0     |
| S8-final-viral-combined_k141_258738  | [full]      | 1683  | No  | NA   | 0  | 2  | Not-determined | Genome-fragment | NA    | 0     |
| S8-final-viral-combined_k141_76107   | [full]      | 3095  | No  | NA   | 0  | 4  | Not-determined | Genome-fragment | NA    | 0     |
| S1-final-viral-combined_k141_30327   | [full]      | 12482 | No  | NA   | 10 | 0  | Low-quality    | Genome-fragment | 22.04 | 0     |
| S12_k141_313973                      |             | 12486 | Yes | 6504 | 1  | 1  | Low-quality    | Genome-fragment | 47.85 | 0     |
| S8-final-viral-combined_k141_110084  | [full]      | 8036  | No  | NA   | 1  | 2  | Not-determined | Genome-fragment | NA    | 0     |
| S2-final-viral-combined_k141_20388   | [full]      | 12497 | No  | NA   | 9  | 0  | Low-quality    | Genome-fragment | 32.54 | 0     |
| S1-final-viral-combined_k141_36054   | [full]      | 12511 | No  | NA   | 1  | 0  | Not-determined | Genome-fragment | 34.46 | 0     |
| S8-final-viral-combined_k141_110102  | [full]      | 3411  | No  | NA   | 0  | 2  | Not-determined | Genome-fragment | NA    | 0     |
| S8_k141_313219                       |             | 12534 | No  | NA   | 1  | 0  | Low-quality    | Genome-fragment | 23.68 | 0     |
| S8-final-viral-combined_k141_225586  | [full]      | 1962  | No  | NA   | 0  | 1  | Not-determined | Genome-fragment | NA    | 0     |
| S2-final-viral-combined_k141_94265   | [full]      | 12535 | Yes | 9041 | 10 | 3  | Low-quality    | Genome-fragment | 19.22 | 27.87 |
| S8-final-viral-combined_k141_225590  | [full]      | 4183  | No  | NA   | 0  | 2  | Not-determined | Genome-fragment | NA    | 0     |
| S8-final-viral-combined_k141_41661   | [full]      | 4733  | No  | NA   | 0  | 1  | Not-determined | Genome-fragment | NA    | 0     |
| S8-final-viral-combined_k141_156786  | [full]      | 18096 | No  | NA   | 11 | 0  | Not-determined | Genome-fragment | NA    | 0     |
| S8-final-viral-combined_k141_237730  | [full]      | 5143  | No  | NA   | 0  | 3  | Not-determined | Genome-fragment | NA    | 0     |
| S12-final-viral-combined_k141_66124  | [full]      | 12538 | No  | NA   | 1  | 0  | Low-quality    | Genome-fragment | 20.26 | 0     |
| S17-final-viral-combined_k141_241675 | [full]      | 12540 | No  | NA   | 0  | 1  | Low-quality    | Genome-fragment | 43.47 | 0     |
| S3-final-viral-combined_k141_60628   | [full]      | 12541 | No  | NA   | 12 | 0  | Low-quality    | Genome-fragment | 35.13 | 0     |
| S8-final-viral-combined_k141_168394  | [full]      | 1696  | No  | NA   | 0  | 0  | Not-determined | Genome-fragment | NA    | 0     |
| S6-final-viral-combined_k141_30386   | [full]      | 12541 | No  | NA   | 9  | 1  | Low-quality    | Genome-fragment | 19.87 | 0     |
| S8-final-viral-combined_k141_6242    | [full]      | 2455  | No  | NA   | 0  | 0  | Not-determined | Genome-fragment | NA    | 0     |
| S8-final-viral-combined_k141_99151   | [full]      | 2666  | No  | NA   | 0  | 0  | Not-determined | Genome-fragment | NA    | 0     |
| S8-final-viral-combined_k141_52779   | [full]      | 4450  | No  | NA   | 0  | 2  | Not-determined | Genome-fragment | NA    | 0     |
| S1_k141_254826                       |             | 12542 | No  | NA   | 0  | 1  | Low-quality    | Genome-fragment | 20.08 | 0     |
| S8-final-viral-combined_k141_99156   | [full]      | 6508  | No  | NA   | 0  | 4  | Not-determined | Genome-fragment | NA    | 0     |
| S8-final-viral-combined_k141_133739  | [full]      | 1054  | No  | NA   | 0  | 0  | Not-determined | Genome-fragment | NA    | 0     |
| S8-final-viral-combined_k141_23806   | [full]      | 1459  | No  | NA   | 0  | 0  | Not-determined | Genome-fragment | NA    | 0     |
| S8-final-viral-combined_k141_258826  | [full]      | 4642  | No  | NA   | 0  | 0  | Not-determined | Genome-fragment | NA    | 0     |
| S8-final-viral-combined_k141_52815   | [full]      | 1100  | No  | NA   | 0  | 1  | Not-determined | Genome-fragment | NA    | 0     |
| S8-final-viral-combined_k141_110137  | [full]      | 3732  | No  | NA   | 0  | 1  | Not-determined | Genome-fragment | NA    | 0     |
| S8-final-viral-combined_k141_99192   | [full]      | 1732  | No  | NA   | 0  | 1  | Not-determined | Genome-fragment | NA    | 0     |
| S8-final-viral-combined_k141_86981   | [full]      | 1418  | No  | NA   | 0  | 0  | Not-determined | Genome-fragment | NA    | 0     |
| S8-final-viral-combined_k141_214092  | [full]      | 1543  | No  | NA   | 0  | 0  | Not-determined | Genome-fragment | NA    | 0     |
| S8-final-viral-combined_k141_145369  | [full]      | 5965  | No  | NA   | 0  | 1  | Not-determined | Genome-fragment | NA    | 0     |
| S8-final-viral-combined_k141_145375  | [full]      | 1031  | No  | NA   | 0  | 1  | Not-determined | Genome-fragment | NA    | 0     |
| S8-final-viral-combined_k141_258849  | [full]      | 1984  | No  | NA   | 0  | 1  | Not-determined | Genome-fragment | NA    | 0     |
| S5-final-viral-combined_k141_20957   | [O_partial] | 12547 | No  | NA   | 1  | 1  | Low-quality    | Genome-fragment | 14.08 | 0     |
| S8-final-viral-combined_k141_191341  | [full]      | 1838  | No  | NA   | 0  | 2  | Not-determined | Genome-fragment | NA    | 0     |
| S8-final-viral-combined_k141_145381  | [full]      | 3097  | No  | NA   | 0  | 1  | Not-determined | Genome-fragment | NA    | 0     |
| S8-final-viral-combined_k141_30540   | [full]      | 4547  | No  | NA   | 0  | 3  | Not-determined | Genome-fragment | NA    | 0     |
| S5-final-viral-combined_k141_171975  | [full]      | 12548 | No  | NA   | 1  | 1  | Low-quality    | Genome-fragment | 14.09 | 0     |
| S8-final-viral-combined_k141_133844  | [full]      | 2811  | No  | NA   | 0  | 0  | Not-determined | Genome-fragment | NA    | 0     |
| S5-final-viral-combined_k141_147938  | [O_partial] | 12549 | No  | NA   | 0  | 0  | Low-quality    | Genome-fragment | 21.77 | 0     |
| S8-final-viral-combined_k141_225671  | [full]      | 1246  | No  | NA   | 0  | 0  | Not-determined | Gen             |       |       |



|                                      |             |       |     |    |       |    |   |                |                 |       |       |
|--------------------------------------|-------------|-------|-----|----|-------|----|---|----------------|-----------------|-------|-------|
| S11-final-viral-combined_k141_36324  | [full]      | 12719 | Yes |    | 7947  | 2  | 2 | Low-quality    | Genome-fragment | 22.4  | 37.52 |
| S8-final-viral-combined_k141_180924  | [full]      | 1032  | No  | NA |       | 1  | 1 | Not-determined | Genome-fragment | 0     | 0     |
| S8-final-viral-combined_k141_134098  | [full]      | 23777 | No  | NA |       | 7  | 0 | Medium-quality | Genome-fragment | NA    | 54.32 |
| S11-final-viral-combined_k141_183174 | [full]      | 12726 | No  | NA |       | 9  | 0 | Low-quality    | Genome-fragment | 21.79 | 0     |
| S8-final-viral-combined_k141_65127   | [full]      | 11260 | No  | NA |       | 0  | 6 | Not-determined | Genome-fragment | NA    | 0     |
| S8-final-viral-combined_k141_10868   | [full]      | 1082  | No  | NA |       | 0  | 0 | Not-determined | Genome-fragment | NA    | 0     |
| S17-final-viral-combined_k141_97582  | [full]      | 12731 | No  | NA |       | 6  | 0 | Low-quality    | Genome-fragment | 31.26 | 0     |
| S8-final-viral-combined_k141_238031  | [full]      | 2322  | No  | NA |       | 0  | 1 | Not-determined | Genome-fragment | NA    | 51.7  |
| S8-final-viral-combined_k141_180975  | [full]      | 20833 | No  | NA |       | 0  | 0 | Medium-quality | Genome-fragment | NA    | 35.05 |
| S11-final-viral-combined_k141_187793 | [full]      | 12764 | No  | NA |       | 6  | 0 | Low-quality    | Genome-fragment | NA    | 0     |
| S8-final-viral-combined_k141_41803   | [full]      | 1580  | No  | NA |       | 0  | 2 | Not-determined | Genome-fragment | NA    | 0     |
| S6-final-viral-combined_k141_106480  | [full]      | 12776 | No  | NA |       | 5  | 0 | Low-quality    | Genome-fragment | 37.22 | 0     |
| S8-final-viral-combined_k141_201844  | [full]      | 1211  | No  | NA |       | 0  | 3 | Not-determined | Genome-fragment | NA    | 0     |
| S11_k141_244323                      |             | 12780 | No  | NA |       | 10 | 1 | Low-quality    | Genome-fragment | 22.07 | 0     |
| S12-final-viral-combined_k141_123991 | [O_partial] | 12783 | No  | NA |       | 2  | 1 | Low-quality    | Genome-fragment | 23.58 | 0     |
| S11_k141_350002                      |             | 12794 | No  | NA |       | 1  | 1 | Low-quality    | Genome-fragment | 6.94  | 0     |
| S7_k141_108203                       |             | 12808 | No  | NA |       | 1  | 2 | Low-quality    | Genome-fragment | 5.51  | 0     |
| S8-final-viral-combined_k141_201849  | [full]      | 1172  | No  | NA |       | 0  | 2 | Not-determined | Genome-fragment | NA    | 0     |
| S8-final-viral-combined_k141_37465   | [full]      | 4092  | No  | NA |       | 0  | 0 | Not-determined | Genome-fragment | NA    | 0     |
| S8-final-viral-combined_k141_238067  | [full]      | 2478  | No  | NA |       | 0  | 3 | Not-determined | Genome-fragment | NA    | 0     |
| S11-final-viral-combined_k141_239427 | [full]      | 12811 | No  | NA |       | 1  | 0 | Low-quality    | Genome-fragment | 21.5  | 0     |
| S12-final-viral-combined_k141_218262 | [O_partial] | 12821 | No  | NA | 10613 | 1  | 1 | Low-quality    | Genome-fragment | 24.8  | 17.16 |
| S8-final-viral-combined_k141_115875  | [full]      | 12821 | No  | NA |       | 8  | 0 | Low-quality    | Genome-fragment | 22.02 | 0     |
| S4-final-viral-combined_k141_154378  | [full]      | 12828 | No  | NA |       | 4  | 2 | Low-quality    | Genome-fragment | 35.91 | 0     |
| S4-final-viral-combined_k141_6948    | [O_partial] | 12828 | No  | NA |       | 3  | 1 | Low-quality    | Genome-fragment | 44.72 | 0     |
| S8-final-viral-combined_k141_6523    | [full]      | 4167  | No  | NA |       | 0  | 0 | Not-determined | Genome-fragment | NA    | 0     |
| S12_k141_240870                      |             | 12833 | No  | NA |       | 0  | 0 | Low-quality    | Genome-fragment | 30.6  | 0     |
| S8-final-viral-combined_k141_76613   | [full]      | 3666  | No  | NA |       | 0  | 2 | Not-determined | Genome-fragment | NA    | 5.11  |
| S12-final-viral-combined_k141_351061 | [O_partial] | 12834 | No  | NA |       | 1  | 1 | Low-quality    | Genome-fragment | 18.5  | 39.29 |
| S2-final-viral-combined_k141_90860   | [full]      | 12840 | Yes |    | 7795  | 3  | 3 | Low-quality    | Genome-fragment | NA    | 0     |
| S8-final-viral-combined_k141_214398  | [full]      | 1608  | No  | NA |       | 0  | 0 | Not-determined | Genome-fragment | NA    | 0     |
| S8-final-viral-combined_k141_6522    | [full]      | 12250 | No  | NA |       | 0  | 0 | Not-determined | Genome-fragment | NA    | 0     |
| S1-final-viral-combined_k141_184295  | [full]      | 12848 | Yes |    | 9761  | 1  | 1 | Low-quality    | Genome-fragment | 3.5   | 24.03 |
| S8-final-viral-combined_k141_87570   | [full]      | 1896  | No  | NA |       | 0  | 0 | Not-determined | Genome-fragment | NA    | 0     |
| S1-final-viral-combined_k141_219614  | [full]      | 12857 | No  | NA |       | 1  | 0 | Low-quality    | Genome-fragment | 31.33 | 0     |
| S1-final-viral-combined_k141_85217   | [full]      | 12864 | No  | NA |       | 0  | 1 | Low-quality    | Genome-fragment | 20.59 | 0     |
| S8-final-viral-combined_k141_238154  | [full]      | 3106  | No  | NA |       | 0  | 2 | Not-determined | Genome-fragment | NA    | 0     |
| S8-final-viral-combined_k141_122200  | [full]      | 1726  | No  | NA |       | 0  | 0 | Not-determined | Genome-fragment | NA    | 0     |
| S8-final-viral-combined_k141_181201  | [full]      | 4025  | No  | NA |       | 0  | 2 | Not-determined | Genome-fragment | NA    | 0     |
| S7-final-viral-combined_k141_187480  | [full]      | 12865 | No  | NA |       | 1  | 7 | Low-quality    | Genome-fragment | 17.29 | 0     |
| S8-final-viral-combined_k141_168637  | [full]      | 1081  | No  | NA |       | 0  | 1 | Not-determined | Genome-fragment | NA    | 0     |
| S8-final-viral-combined_k141_225841  | [full]      | 1983  | No  | NA |       | 0  | 0 | Not-determined | Genome-fragment | NA    | 0     |
| S8-final-viral-combined_k141_65269   | [full]      | 1664  | No  | NA |       | 0  | 4 | Not-determined | Genome-fragment | NA    | 0     |
| S8-final-viral-combined_k141_214453  | [full]      | 1614  | No  | NA |       | 0  | 2 | Not-determined | Genome-fragment | NA    | 0     |
| S8-final-viral-combined_k141_155052  | [full]      | 12866 | No  | NA |       | 6  | 1 | Low-quality    | Genome-fragment | 35.97 | 0     |
| S3-final-viral-combined_k141_129583  | [full]      | 12869 | No  | NA |       | 0  | 1 | Low-quality    | Genome-fragment | 30.7  | 0     |
| S8-final-viral-combined_k141_72268   | [full]      | 3387  | No  | NA |       | 0  | 0 | Not-determined | Genome-fragment | NA    | 0     |
| S1-final-viral-combined_k141_247934  | [full]      | 12874 | No  | NA |       | 0  | 0 | Low-quality    | Genome-fragment | 33.72 | 0     |
| S7-final-viral-combined_k141_11409   | [full]      | 12878 | No  | NA |       | 0  | 1 | Low-quality    | Genome-fragment | 7.94  | 0     |
| S8-final-viral-combined_k141_12252   | [full]      | 5047  | No  | NA |       | 0  | 1 | Not-determined | Genome-fragment | NA    | 0     |
| S8-final-viral-combined_k141_145864  | [full]      | 1225  | No  | NA |       | 0  | 0 | Not-determined | Genome-fragment | NA    | 0     |
| S9-final-viral-combined_k141_103478  | [O_partial] | 12881 | Yes |    | 9657  | 0  | 5 | Low-quality    | Genome-fragment | 18.92 | 25.03 |
| S8-final-viral-combined_k141_168694  | [full]      | 1676  | No  | NA |       | 2  | 2 | Not-determined | Genome-fragment | NA    | 0     |
| S8-final-viral-combined_k141_134284  | [full]      | 26978 | No  | NA |       | 5  | 0 | Medium-quality | Genome-fragment | 65.74 | 0     |
| S7-final-viral-combined_k141_163781  | [O_partial] | 12893 | Yes |    | 4910  | 2  | 4 | Low-quality    | Genome-fragment | 1.62  | 61.95 |
| S8-final-viral-combined_k141_248587  | [full]      | 2483  | No  | NA |       | 0  | 2 | Not-determined | Genome-fragment | NA    | 0     |
| S8-final-viral-combined_k141_76704   | [full]      | 1243  | No  | NA |       | 0  | 0 | Not-determined | Genome-fragment | NA    | 0     |
| S8-final-viral-combined_k141_201961  | [full]      | 3245  | No  | NA |       | 0  | 2 | Not-determined | Genome-fragment | NA    | 0     |
| S4_k141_501                          |             | 12903 | No  | NA |       | 6  | 0 | Low-quality    | Genome-fragment | 30.52 | 0     |
| S8-final-viral-combined_k141_214510  | [full]      | 1812  | No  | NA |       | 0  | 1 | Not-determined | Genome-fragment | NA    | 0     |
| S8-final-viral-combined_k141_214541  | [full]      | 1739  | No  | NA |       | 0  | 2 | Not-determined | Genome-fragment | NA    | 0     |
| S8-final-viral-combined_k141_17401   | [full]      | 6393  | No  | NA |       | 0  | 3 | Not-determined | Genome-fragment | NA    | 0     |
| S8-final-viral-combined_k141_168757  | [full]      | 3507  | No  | NA |       | 0  | 1 | Not-determined | Genome-fragment | NA    | 0     |
| S8-final-viral-combined_k141_53307   | [full]      | 3345  | No  | NA |       | 0  | 0 | Not-determined | Genome-fragment | NA    | 0     |
| S8_k141_11757                        |             | 12904 | No  | NA |       | 9  | 0 | Low-quality    | Genome-fragment | 30.34 | 0     |
| S7-final-viral-combined_k141_132590  | [full]      | 12920 | No  | NA |       | 1  | 0 | Low-quality    | Genome-fragment | 19.55 | 0     |
| S8-final-viral-combined_k141_6630    | [full]      | 1594  | No  | NA |       | 0  | 2 | Not-determined | Genome-fragment | NA    | 0     |
| S8-final-viral-combined_k141_202032  | [full]      | 2499  | No  | NA |       | 0  | 1 | Not-determined | Genome-fragment | NA    | 0     |
| S8-final-viral-combined_k141_238191  | [full]      | 1706  | No  | NA |       | 0  | 0 | Not-determined | Genome-fragment | NA    | 0     |
| S5_k141_170727                       |             | 12922 | No  | NA |       | 0  | 3 | Low-quality    | Genome-fragment | 23.58 | 0     |
| S8-final-viral-combined_k141_2075    | [full]      | 6190  | No  | NA |       | 0  | 4 | Not-determined | Genome-fragment | NA    | 10.77 |
| S12-final-viral-combined_k141_106251 | [full]      | 12924 | No  | NA |       | 3  | 0 | Low-quality    | Genome-fragment | 7.38  | 0     |
| S2_k141_119739                       |             | 12927 | No  | NA |       | 2  | 0 | Low-quality    | Genome-fragment | 19.56 | 0     |
| S17-k141_50561                       |             | 12929 | No  | NA |       | 1  | 3 | Low-quality    | Genome-fragment | 11.69 | 0     |
| S6-final-viral-combined_k141_76066   | [full]      | 12940 | No  | NA |       | 1  | 2 | Low-quality    | Genome-fragment | 6.47  | 0     |
| S8-final-viral-combined_k141_146005  | [full]      | 1100  | No  | NA |       | 0  | 0 | Not-determined | Genome-fragment | NA    | 0     |
| S11-final-viral-combined_k141_182056 | [full]      | 12945 | No  | NA |       | 0  | 7 | Low-quality    | Genome-fragment | NA    | 0     |
| S8-final-viral-combined_k141_99718   | [full]      | 1115  | No  | NA |       | 0  | 1 | Not-determined | Genome-fragment | NA    | 0     |
| S8-final-viral-combined_k141_87689   | [full]      | 3465  | No  | NA |       | 0  | 2 | Not-determined | Genome-fragment | NA    | 0     |
| S8-final-viral-combined_k141_226076  | [full]      | 52058 | No  | NA |       | 7  | 0 | High-quality   | High-quality    | 99.81 | 0     |
| S8-final-viral-combined_k141_214626  | [full]      | 16833 | No  | NA |       | 0  | 6 | Not-determined | Genome-fragment | NA    | 7.83  |
| S2-final-viral-combined_k141_212600  | [full]      | 12945 | No  | NA |       | 6  | 0 | Low-quality    | Genome-fragment | 29.74 | 0     |
| S8-final-viral-combined_k141_2267    | [full]      | 12957 | No  | NA |       | 1  | 0 | Low-quality    | Genome-fragment | NA    | 0     |
| S8-final-viral-combined_k141_259324  | [full]      | 2675  | No  | NA |       | 0  | 1 | Not-determined | Genome-fragment | NA    | 0     |
| S8-final-viral-combined_k141_134493  | [full]      | 4524  | No  | NA |       | 0  | 2 | Not-determined | Genome-fragment | NA    | 0     |
| S2-final-viral-combined_k141_110728  | [full]      | 12958 | Yes |    | 5467  | 2  | 5 | Low-quality    | Genome-fragment | 9.76  | 57.81 |
| S9-final-viral-combined_k141_11960   | [full]      | 12965 | No  | NA |       | 1  | 5 | Low-quality    | Genome-fragment | 8.72  | 0     |
| S11-final-viral-combined_k141_131053 | [O_partial] | 12976 | No  | NA |       | 1  | 1 | Low-quality    | Genome-fragment | 18.08 | 0     |
| S8-final-viral-combined_k141_238450  | [full]      | 2159  | No  | NA |       | 0  | 1 | Not-determined | Genome-fragment | NA    | 0     |
| S8-final-viral-combined_k141_53450   | [full]      | 2272  | No  | NA |       | 0  | 1 | Not-determined | Genome-fragment | NA    | 0     |
| S8-final-viral-combined_k141_76958   | [full]      | 2811  | No  | NA |       | 0  | 1 | Not-determined | Genome-fragment | NA    | 0     |
| S8-final-viral-combined_k141_168930  | [full]      | 3061  | No  | NA |       | 0  | 3 | Not-determined | Genome-fragment | NA    | 0     |
| S1_k141_184140                       |             | 12978 | No  | NA |       | 9  | 0 | Low-quality    | Genome-fragment | 20.86 | 0     |
| S8-final-viral-combined_k141_99755   | [full]      | 1871  | No  | NA |       | 0  | 1 | Not-determined | Genome-fragment | NA    | 0     |
| S8-final-viral-combined_k141_259363  | [full]      | 1289  | No  | NA |       | 0  | 0 | Not-determined | Genome-fragment | NA    | 0     |
| S8-final-viral-combined_k141_110641  | [full]      | 4268  | No  | NA |       | 0  | 2 | Not-determined | Genome-fragment | NA    | 0     |
| S8-final-viral-combined_k141_13123   | [full]      | 1423  | No  | NA |       | 0  | 0 | Not-determined | Genome-fragment | NA    | 0     |
| S8-final-viral-combined_k141_214667  | [full]      | 2902  | No  | NA |       | 0  | 4 | Not-determined | Genome-fragment | NA    | 0     |
| S8-final-viral-combined_k141_226162  | [full]      | 2051  | No  | NA |       | 0  | 0 | Not-determined | Genome-fragment | NA    | 0     |
| S5-final-viral-combined_k141_206359  | [O_partial] | 12999 | Yes |    | 2868  | 3  | 6 | Low-quality    | Genome-fragment | 3.61  | 77.94 |
| S8-final-viral-combined_k141_8781    | [full]      | 6855  | No  | NA |       | 0  | 2 | Not-determined | Genome-fragment | NA    | 0     |
| S8-final-viral-combined_k141_249571  | [full]      | 2103  | No  | NA |       | 0  | 0 | Not-determined | Genome-fragment | NA    | 0     |
| S8-final-viral-combined_k141_76945   | [full]      | 1604  | No  | NA |       | 0  | 1 | Not-determined | Genome-fragment | NA    | 0     |
| S8-final-viral-combined_k141_99702   | [full]      | 3789  | No  | NA |       | 0  | 1 | Not-determined | Genome-fragment | NA    | 0     |
| S8-final-viral-combined_k141_135555  | [full]      | 2915  | No  | NA |       | 0  | 3 | Not-determined | Genome-fragment | NA    | 0     |
| S12-final-viral-combined_k141_363126 | [O_partial] | 12999 | No  | NA |       | 1  | 5 | Low-quality    | Genome-fragment | 14.59 | 0     |
| S8-final-viral-combined_k141_249608  | [full]      | 1094  | No  | NA |       | 0  | 1 | Not-determined | Genome-fragment | NA    | 0     |
| S7-final-viral-combined_k141_119732  | [O_partial] | 13006 | No  | NA |       | 0  | 4 | Low-quality    | Genome-fragment | 13.97 | 0     |
| S8-final-viral-combined_k141_25947   | [full]      | 1062  | No  | NA |       | 0  | 0 | Not-determined | Genome-fragment | NA    | 0     |
| S8-final-viral-combined_k141_134587  | [full]      | 3518  | No  | NA |       | 0  | 2 | Not-determined | Genome-fragment | NA    | 0     |
| S8-final-viral-combined_k141_259438  | [full]      | 12246 | No  | NA |       | 0  | 6 | Not-determined | Genome-fragment | NA    | 0     |
| S8-final-viral-combined_k141_110801  | [full]      | 1519  | No  | NA |       | 0  | 0 | Not-determined | Genome-fragment | NA    | 0     |
| S8-final-viral-combined_k141_157607  | [full]      | 2046  | No  | NA |       | 0  | 1 | Not-determined | Genome-fragment | NA    | 0     |
| S8-final-viral-combined_k141_146233  | [full]      | 1522  | No  | NA |       | 0  | 1 | Not-determined | Genome-fragment | NA    | 34.03 |
| S1-final-viral-combined_k141_156458  | [full]      | 13009 | No  | NA |       | 7  | 0 | Low-quality    | Genome-fragment | 16.2  | 0     |
| S1_k141_197349                       |             | 13021 | No  | NA |       | 1  | 1 | Low-quality    | Genome-fragment | 12.47 | 0     |
| S1_k141_25214                        |             | 13023 | No  | NA |       | 5  | 0 | Low-quality    | Genome-fragment | 12.34 | 0     |
| S1_k141_68105                        |             | 13049 | No  | NA |       | 0  | 4 | Low-quality    | Genome-fragment | 9.18  | 0     |
| S8_k141_187987                       |             | 13049 | No  | NA |       | 2  | 0 | Low-quality    | Genome-fragment | NA    | 0     |
| S8-final-viral-combined_k141_65689   | [full]      | 1042  | No  | NA |       | 0  | 1 | Not-determined | Genome-fragment | NA    | 12.86 |
| S7-final-viral-combined_k141_53754   | [O_partial] | 13050 | Yes |    | 8671  | 3  | 4 | Low-quality    | Genome-fragment | 14.63 | 43.08 |
| S8-final-viral-combined_k141_146274  | [full]      | 1219  | No  | NA |       | 0  | 0 | Not-determined | Genome-fragment | NA    | 0     |
| S8-final-viral-combined_k141_93259   | [O_partial] | 13055 | Yes |    | 7431  | 4  | 7 | Low-quality    | Genome-fragment | NA    | 0     |
| S8-final-viral-combined_k141_6955    | [full]      |       |     |    |       |    |   |                |                 |       |       |



|                                      |             |       |     |    |       |   |                |                 |       |       |
|--------------------------------------|-------------|-------|-----|----|-------|---|----------------|-----------------|-------|-------|
| S8-final-viral-combined_k141_226502  | [full]      | 9884  | No  | NA | 0     | 3 | Not-determined | Genome-fragment | NA    | 0     |
| S5-final-viral-combined_k141_395477  | [full]      | 13193 | No  | NA | 1     | 4 | Low-quality    | Genome-fragment | 10.36 | 0     |
| S11-final-viral-combined_k141_311238 | [full]      | 13202 | No  | NA | 7     | 0 | Low-quality    | Genome-fragment | 27.51 | 0     |
| S8-final-viral-combined_k141_65877   | [full]      | 1423  | No  | NA | 0     | 1 | Not-determined | Genome-fragment | NA    | 0     |
| S8-final-viral-combined_k141_100137  | [full]      | 4874  | No  | NA | 0     | 7 | Not-determined | Genome-fragment | NA    | 0     |
| S8-final-viral-combined_k141_7191    | [full]      | 2598  | No  | NA | 0     | 0 | Not-determined | Genome-fragment | NA    | 0     |
| S8-final-viral-combined_k141_146562  | [full]      | 27866 | No  | NA | 19    | 0 | Medium-quality | Genome-fragment | 53.28 | 0     |
| S7_k141_107523                       |             | 13218 | No  | NA | 5     | 0 | Low-quality    | Genome-fragment | 26.23 | 0     |
| S8-final-viral-combined_k141_202482  | [full]      | 2014  | No  | NA | 0     | 0 | Not-determined | Genome-fragment | NA    | 0     |
| S3-final-viral-combined_k141_55397   | [full]      | 13245 | No  | NA | 7     | 0 | Low-quality    | Genome-fragment | 40.44 | 0     |
| S8-final-viral-combined_k141_157988  | [full]      | 2382  | No  | NA | 0     | 2 | Not-determined | Genome-fragment | NA    | 0     |
| S17_k141_229317                      |             | 13261 | No  | NA | 1     | 0 | Low-quality    | Genome-fragment | 48.78 | 0     |
| S8-final-viral-combined_k141_53973   | [full]      | 7641  | No  | NA | 0     | 5 | Not-determined | Genome-fragment | NA    | 0     |
| S8-final-viral-combined_k141_192183  | [full]      | 2837  | No  | NA | 0     | 2 | Not-determined | Genome-fragment | NA    | 0     |
| S9-final-viral-combined_k141_39807   | [O_partial] | 12266 | No  | NA | 0     | 7 | Low-quality    | Genome-fragment | 1.99  | 0     |
| S8-final-viral-combined_k141_17971   | [full]      | 2704  | No  | NA | 0     | 2 | Not-determined | Genome-fragment | NA    | 0     |
| S12_k141_158887                      |             | 13275 | No  | NA | 9     | 0 | Low-quality    | Genome-fragment | 32.9  | 0     |
| S8-final-viral-combined_k141_31813   | [full]      | 9338  | No  | NA | 0     | 5 | Not-determined | Genome-fragment | NA    | 0     |
| S2-final-viral-combined_k141_26313   | [full]      | 13281 | No  | NA | 0     | 0 | Low-quality    | Genome-fragment | 41.69 | 0     |
| S8-final-viral-combined_k141_202521  | [full]      | 2334  | No  | NA | 0     | 2 | Not-determined | Genome-fragment | NA    | 0     |
| S8-final-viral-combined_k141_54003   | [full]      | 2362  | No  | NA | 0     | 2 | Not-determined | Genome-fragment | NA    | 0     |
| S8-final-viral-combined_k141_202329  | [full]      | 2722  | No  | NA | 0     | 3 | Not-determined | Genome-fragment | NA    | 0     |
| S8-final-viral-combined_k141_272859  | [full]      | 1226  | No  | NA | 0     | 1 | Not-determined | Genome-fragment | NA    | 0     |
| S1-final-viral-combined_k141_24555   | [full]      | 13287 | No  | NA | 1     | 1 | Low-quality    | Genome-fragment | 31.45 | 0     |
| S8-final-viral-combined_k141_54031   | [full]      | 2326  | No  | NA | 0     | 3 | Not-determined | Genome-fragment | NA    | 0     |
| S8-final-viral-combined_k141_238061  | [full]      | 5350  | No  | NA | 0     | 2 | Not-determined | Genome-fragment | NA    | 0     |
| S8-final-viral-combined_k141_122979  | [full]      | 1553  | No  | NA | 0     | 1 | Not-determined | Genome-fragment | NA    | 0     |
| S12-final-viral-combined_k141_46526  | [full]      | 1292  | Yes | NA | 5753  | 2 | Low-quality    | Genome-fragment | 2.42  | 56.72 |
| S8-final-viral-combined_k141_239070  | [full]      | 4463  | No  | NA | 0     | 4 | Not-determined | Genome-fragment | NA    | 0     |
| S8-final-viral-combined_k141_31829   | [full]      | 1031  | No  | NA | 0     | 0 | Not-determined | Genome-fragment | NA    | 0     |
| S8-final-viral-combined_k141_181844  | [full]      | 2063  | No  | NA | 0     | 2 | Not-determined | Genome-fragment | NA    | 0     |
| S12-final-viral-combined_k141_36103  | [O_partial] | 12293 | Yes | NA | 460   | 1 | Low-quality    | Genome-fragment | 0.41  | 96.54 |
| S8-final-viral-combined_k141_202560  | [full]      | 8439  | No  | NA | 0     | 4 | Not-determined | Genome-fragment | NA    | 0     |
| S17-final-viral-combined_k141_71030  | [full]      | 13295 | No  | NA | 1     | 5 | Low-quality    | Genome-fragment | 8.56  | 0     |
| S8-final-viral-combined_k141_165765  | [full]      | 13297 | No  | NA | 5     | 1 | Low-quality    | Genome-fragment | 16    | 0     |
| S8-final-viral-combined_k141_42579   | [full]      | 2709  | No  | NA | 0     | 2 | Not-determined | Genome-fragment | NA    | 0     |
| S8-final-viral-combined_k141_192227  | [full]      | 1758  | No  | NA | 0     | 0 | Not-determined | Genome-fragment | NA    | 0     |
| S8-final-viral-combined_k141_31864   | [full]      | 2110  | No  | NA | 0     | 0 | Not-determined | Genome-fragment | NA    | 0     |
| S11-final-viral-combined_k141_328403 | [full]      | 13299 | No  | NA | 1     | 1 | Low-quality    | Genome-fragment | 5.1   | 0     |
| S5_k141_38576                        |             | 13320 | No  | NA | 13    | 0 | Low-quality    | Genome-fragment | 33.06 | 0     |
| S8-final-viral-combined_k141_181882  | [full]      | 5884  | No  | NA | 0     | 3 | Not-determined | Genome-fragment | NA    | 0     |
| S8-final-viral-combined_k141_27781   | [full]      | 2160  | No  | NA | 1     | 1 | Not-determined | Genome-fragment | NA    | 0     |
| S8-final-viral-combined_k141_239129  | [full]      | 3270  | No  | NA | 0     | 3 | Not-determined | Genome-fragment | NA    | 0     |
| S8-final-viral-combined_k141_100214  | [full]      | 4060  | No  | NA | 0     | 3 | Not-determined | Genome-fragment | NA    | 0     |
| S8-final-viral-combined_k141_77446   | [full]      | 2313  | No  | NA | 2     | 3 | Not-determined | Genome-fragment | NA    | 0     |
| S5-final-viral-combined_k141_172723  | [O_partial] | 13336 | Yes | NA | 8048  | 2 | Low-quality    | Genome-fragment | 3.43  | 39.65 |
| S11-final-viral-combined_k141_157987 | [full]      | 13345 | No  | NA | 5     | 1 | Low-quality    | Genome-fragment | 16.55 | 0     |
| S12-final-viral-combined_k141_28763  | [full]      | 13345 | No  | NA | 1     | 6 | Low-quality    | Genome-fragment | 19.16 | 0     |
| S11-final-viral-combined_k141_15521  | [full]      | 13348 | No  | NA | 0     | 1 | Low-quality    | Genome-fragment | 8.48  | 0     |
| S5-final-viral-combined_k141_213553  | [O_partial] | 13360 | Yes | NA | 10450 | 2 | Low-quality    | Genome-fragment | 5.87  | 21.78 |
| S8-final-viral-combined_k141_226645  | [full]      | 3870  | No  | NA | 0     | 1 | Not-determined | Genome-fragment | NA    | 0     |
| S8-final-viral-combined_k141_178550  | [O_partial] | 13362 | No  | NA | 1     | 6 | Low-quality    | Genome-fragment | 19.02 | 0     |
| S8-final-viral-combined_k141_42714   | [full]      | 1708  | No  | NA | 0     | 1 | Not-determined | Genome-fragment | NA    | 0     |
| S8-final-viral-combined_k141_146759  | [full]      | 1478  | No  | NA | 0     | 1 | Not-determined | Genome-fragment | NA    | 0     |
| S12_k141_5449                        |             | 13366 | No  | NA | 9     | 0 | Low-quality    | Genome-fragment | 46.33 | 0     |
| S8-final-viral-combined_k141_135088  | [full]      | 2599  | No  | NA | 0     | 2 | Not-determined | Genome-fragment | NA    | 0     |
| S8-final-viral-combined_k141_31954   | [full]      | 1121  | No  | NA | 0     | 1 | Not-determined | Genome-fragment | NA    | 0     |
| S7_k141_154409                       |             | 13385 | No  | NA | 2     | 0 | Low-quality    | Genome-fragment | 22.94 | 0     |
| S8-final-viral-combined_k141_273063  | [full]      | 2621  | No  | NA | 0     | 1 | Not-determined | Genome-fragment | NA    | 0     |
| S8-final-viral-combined_k141_42760   | [full]      | 5087  | No  | NA | 0     | 2 | Not-determined | Genome-fragment | NA    | 0     |
| S9-final-viral-combined_k141_30377   | [full]      | 13389 | No  | NA | 2     | 0 | Low-quality    | Genome-fragment | 11.7  | 0     |
| S1_k141_286742                       |             | 13396 | No  | NA | 9     | 1 | Low-quality    | Genome-fragment | 27.88 | 0     |
| S5-final-viral-combined_k141_161907  | [full]      | 13398 | No  | NA | 2     | 0 | Low-quality    | Genome-fragment | 42.33 | 0     |
| S4_k141_8591                         |             | 13410 | No  | NA | 8     | 1 | Low-quality    | Genome-fragment | 34.02 | 0     |
| S1_k141_275179                       |             | 13417 | No  | NA | 4     | 4 | Low-quality    | Genome-fragment | 22.46 | 0     |
| S2_k141_208802                       |             | 13417 | No  | NA | 0     | 0 | Low-quality    | Genome-fragment | 7.7   | 0     |
| S8-final-viral-combined_k141_54183   | [full]      | 2047  | No  | NA | 0     | 1 | Not-determined | Genome-fragment | NA    | 0     |
| S8-final-viral-combined_k141_23937   | [full]      | 1868  | No  | NA | 0     | 1 | Not-determined | Genome-fragment | NA    | 0     |
| S8-final-viral-combined_k141_241616  | [full]      | 13421 | No  | NA | 0     | 0 | Low-quality    | Genome-fragment | 10.13 | 0     |
| S8-final-viral-combined_k141_239359  | [full]      | 1404  | No  | NA | 0     | 2 | Not-determined | Genome-fragment | NA    | 0     |
| S5-final-viral-combined_k141_12116   | [full]      | 13423 | No  | NA | 3     | 0 | Low-quality    | Genome-fragment | 7.97  | 0     |
| S8-final-viral-combined_k141_135188  | [full]      | 6504  | No  | NA | 0     | 0 | Not-determined | Genome-fragment | NA    | 0     |
| S8-final-viral-combined_k141_192339  | [full]      | 1433  | No  | NA | 0     | 0 | Not-determined | Genome-fragment | NA    | 0     |
| S17-final-viral-combined_k141_78587  | [full]      | 13434 | No  | NA | 1     | 4 | Low-quality    | Genome-fragment | 16.19 | 0     |
| S2_k141_23553                        |             | 13436 | No  | NA | 8     | 0 | Low-quality    | Genome-fragment | 29.57 | 0     |
| S8-final-viral-combined_k141_111335  | [full]      | 2514  | No  | NA | 0     | 2 | Not-determined | Genome-fragment | NA    | 0     |
| S8-final-viral-combined_k141_243625  | [full]      | 13439 | Yes | NA | 10453 | 4 | Low-quality    | Genome-fragment | 26.08 | 22.22 |
| S11-final-viral-combined_k141_75879  | [full]      | 13443 | No  | NA | 3     | 0 | Low-quality    | Genome-fragment | 29.95 | 0     |
| S8-final-viral-combined_k141_77712   | [full]      | 3479  | No  | NA | 0     | 2 | Not-determined | Genome-fragment | NA    | 0     |
| S8-final-viral-combined_k141_42869   | [full]      | 1693  | No  | NA | 0     | 0 | Not-determined | Genome-fragment | NA    | 0     |
| S8-final-viral-combined_k141_202688  | [full]      | 8292  | No  | NA | 0     | 8 | Not-determined | Genome-fragment | NA    | 0     |
| S8-final-viral-combined_k141_202693  | [full]      | 1985  | No  | NA | 0     | 1 | Not-determined | Genome-fragment | NA    | 0     |
| S1-final-viral-combined_k141_51436   | [full]      | 13448 | No  | NA | 4     | 1 | Low-quality    | Genome-fragment | 32.29 | 0     |
| S8-final-viral-combined_k141_111386  | [full]      | 1789  | No  | NA | 0     | 1 | Not-determined | Genome-fragment | NA    | 0     |
| S8-final-viral-combined_k141_192420  | [full]      | 1972  | No  | NA | 0     | 1 | Not-determined | Genome-fragment | NA    | 0     |
| S17-final-viral-combined_k141_132430 | [full]      | 13452 | No  | NA | 8     | 1 | Low-quality    | Genome-fragment | 33.37 | 0     |
| S9-final-viral-combined_k141_118456  | [full]      | 13455 | No  | NA | 9     | 0 | Low-quality    | Genome-fragment | 31.05 | 0     |
| S8-final-viral-combined_k141_18185   | [full]      | 3517  | No  | NA | 0     | 0 | Not-determined | Genome-fragment | NA    | 0     |
| S8-final-viral-combined_k141_4655    | [full]      | 13476 | No  | NA | 0     | 1 | Not-determined | Genome-fragment | NA    | 0     |
| S8-final-viral-combined_k141_111410  | [full]      | 1772  | No  | NA | 0     | 1 | Not-determined | Genome-fragment | NA    | 0     |
| S7-final-viral-combined_k141_27531   | [O_partial] | 13488 | No  | NA | 1     | 2 | Low-quality    | Genome-fragment | 20.69 | 0     |
| S8-final-viral-combined_k141_160488  | [full]      | 1066  | No  | NA | 0     | 0 | Not-determined | Genome-fragment | NA    | 0     |
| S4-final-viral-combined_k141_116046  | [full]      | 13504 | No  | NA | 1     | 0 | Low-quality    | Genome-fragment | 8.87  | 0     |
| S8-final-viral-combined_k141_18217   | [full]      | 1745  | No  | NA | 0     | 1 | Not-determined | Genome-fragment | NA    | 0     |
| S8-final-viral-combined_k141_239436  | [full]      | 2909  | No  | NA | 0     | 0 | Not-determined | Genome-fragment | NA    | 0     |
| S2_k141_188028                       |             | 13518 | No  | NA | 1     | 0 | Low-quality    | Genome-fragment | 30.44 | 0     |
| S8-final-viral-combined_k141_192468  | [full]      | 1094  | No  | NA | 0     | 1 | Not-determined | Genome-fragment | NA    | 0     |
| S8-final-viral-combined_k141_21296   | [full]      | 1764  | No  | NA | 0     | 1 | Not-determined | Genome-fragment | NA    | 0     |
| S8-final-viral-combined_k141_42984   | [full]      | 5004  | No  | NA | 0     | 1 | Not-determined | Genome-fragment | NA    | 0     |
| S8-final-viral-combined_k141_226847  | [full]      | 2444  | No  | NA | 0     | 1 | Not-determined | Genome-fragment | NA    | 0     |
| S8-final-viral-combined_k141_169741  | [full]      | 3618  | No  | NA | 0     | 1 | Not-determined | Genome-fragment | NA    | 0     |
| S7-final-viral-combined_k141_144094  | [full]      | 13517 | No  | NA | 0     | 1 | Low-quality    | Genome-fragment | 8.71  | 0     |
| S8-final-viral-combined_k141_169745  | [full]      | 1374  | No  | NA | 0     | 1 | Not-determined | Genome-fragment | NA    | 0     |
| S8-final-viral-combined_k141_43022   | [full]      | 3594  | No  | NA | 0     | 2 | Not-determined | Genome-fragment | NA    | 0     |
| S2-final-viral-combined_k141_70571   | [full]      | 13513 | No  | NA | 3     | 1 | Low-quality    | Genome-fragment | 22.73 | 0     |
| S8-final-viral-combined_k141_32235   | [full]      | 1683  | No  | NA | 0     | 1 | Not-determined | Genome-fragment | NA    | 0     |
| S17_k141_264801                      |             | 13514 | No  | NA | 0     | 0 | Low-quality    | Genome-fragment | 37.03 | 0     |
| S8-final-viral-combined_k141_192538  | [full]      | 1452  | No  | NA | 0     | 0 | Not-determined | Genome-fragment | NA    | 0     |
| S8-final-viral-combined_k141_273107  | [full]      | 1175  | No  | NA | 0     | 0 | Not-determined | Genome-fragment | NA    | 0     |
| S8-final-viral-combined_k141_169768  | [full]      | 3290  | No  | NA | 0     | 3 | Not-determined | Genome-fragment | NA    | 0     |
| S11_k141_308145                      |             | 13550 | No  | NA | 0     | 2 | Low-quality    | Genome-fragment | 28.66 | 0     |
| S5-final-viral-combined_k141_110550  | [O_partial] | 13552 | No  | NA | 0     | 1 | Low-quality    | Genome-fragment | 23.35 | 0     |
| S11_k141_236731                      |             | 13572 | No  | NA | 10    | 0 | Low-quality    | Genome-fragment | 26.35 | 0     |
| S8-final-viral-combined_k141_111512  | [full]      | 1589  | No  | NA | 0     | 1 | Not-determined | Genome-fragment | NA    | 0     |
| S2_k141_231484                       |             | 13577 | No  | NA | 8     | 0 | Low-quality    | Genome-fragment | 27.16 | 0     |
| S2-final-viral-combined_k141_239885  | [full]      | 13580 | No  | NA | 9     | 0 | Low-quality    | Genome-fragment | 21.8  | 0     |
| S2-final-viral-combined_k141_166878  | [O_partial] | 13595 | No  | NA | 1     | 6 | Low-quality    | Genome-fragment | 11.14 | 0     |
| S8-final-viral-combined_k141_100573  | [full]      | 1099  | No  | NA | 0     | 0 | Not-determined | Genome-fragment | NA    | 0     |
| S1-final-viral-combined_k141_47461   | [full]      | 13599 | No  | NA | 1     | 1 | Low-quality    | Genome-fragment | 17.83 | 0     |
| S8_k141_221515                       |             | 13607 | No  | NA | 0     | 2 | Low-quality    | Genome-fragment | 20.57 | 0     |
| S8-final-viral-combined_k141_123439  | [full]      | 1279  | No  | NA | 0     | 1 | Not-determined | Genome-fragment | NA    | 0     |
| S8-final-viral-combined_k141_192426  | [full]      | 1055  | No  | NA | 0     | 0 | Not-determined | Genome-fragment | NA    | 0     |
| S11_k141_292449                      |             | 13620 | No  | NA | 1     | 3 | Low-quality    | Genome-fragment | 18.63 | 0     |
| S8-final-viral-combined_k141_111570  | [full]      | 2690  | No  | NA | 0     | 0 | Not-determined | Genome-fragment | NA    | 0     |
| S8-final-viral-combined_k141_147204  | [full]      | 1888  | No  | NA | 0     | 1 | Not-determined | Genome-fragment | NA    | 0     |
| S8-final-viral-combined_k141_7418    | [full]      | 3821  | No  | NA | 0     | 2 | Not-determined | Genome-fragment | NA    | 0     |
| S8-final-viral-combined_k141_123493  | [full]      | 2387  | No  | NA | 0     | 0 | Not-determined | Genome-fragment | NA    | 0     |
| S8-final-viral-combined_k141_147213  | [full]      | 5675  | No  | NA | 0     | 1 | Not-determined | Genome-fragment | NA    | 0     |
| S4-final-viral-combined_k141_132781  | [full]      | 13624 | No  | NA | 2     | 2 | Low-quality    | Genome-fragment | 12.19 | 0     |
| S2-final-viral-combined_k141_111661  | [           |       |     |    |       |   |                |                 |       |       |



|                                      |             |       |     |       |    |    |                |                 |    |       |       |
|--------------------------------------|-------------|-------|-----|-------|----|----|----------------|-----------------|----|-------|-------|
| S8-final-viral-combined_k141_182332  | [full]      | 1910  | No  | NA    | 0  | 0  | Not-determined | Genome-fragment | NA | 0     | 0     |
| S8-final-viral-combined_k141_433485  | [full]      | 1173  | No  | NA    | 0  | 0  | Not-determined | Genome-fragment | NA | 0     | 0     |
| S3-final-viral-combined_k141_29087   | [full]      | 13814 | No  | NA    | 0  | 1  | Low-quality    | Genome-fragment | NA | 28.13 | 0     |
| S8-final-viral-combined_k141_18577   | [full]      | 6896  | No  | NA    | 0  | 3  | Not-determined | Genome-fragment | NA | 0     | 0     |
| S7_k141_67056                        |             | 13816 | No  | NA    | 10 | 0  | Low-quality    | Genome-fragment | NA | 39.76 | 0     |
| S8-final-viral-combined_k141_239791  | [full]      | 13258 | No  | NA    | 13 | 0  | High-quality   | High-quality    | NA | 97.67 | 0     |
| S11-final-viral-combined_k141_253889 | [full]      | 13841 | No  | NA    | 3  | 0  | Low-quality    | Genome-fragment | NA | 31.06 | 0     |
| S7-final-viral-combined_k141_222689  | [full]      | 13855 | No  | NA    | 1  | 2  | Low-quality    | Genome-fragment | NA | 3.93  | 0     |
| S8-final-viral-combined_k141_182155  | [full]      | 5013  | No  | NA    | 0  | 4  | Not-determined | Genome-fragment | NA | 0     | 0     |
| S8-final-viral-combined_k141_123782  | [full]      | 1219  | No  | NA    | 0  | 0  | Not-determined | Genome-fragment | NA | 0     | 0     |
| S11-final-viral-combined_k141_70339  | [O_partial] | 13856 | Yes | 10298 | 3  | 3  | Low-quality    | Genome-fragment | NA | 19.6  | 25.68 |
| S8-final-viral-combined_k141_88620   | [full]      | 13861 | Yes | 11509 | 2  | 2  | Low-quality    | Genome-fragment | NA | 25.94 | 16.97 |
| S8-final-viral-combined_k141_169996  | [full]      | 2109  | No  | NA    | 0  | 3  | Not-determined | Genome-fragment | NA | 0     | 0     |
| S8-final-viral-combined_k141_224663  | [full]      | 13863 | No  | NA    | 6  | 1  | Low-quality    | Genome-fragment | NA | 26.72 | 0     |
| S8-final-viral-combined_k141_135788  | [full]      | 2005  | No  | NA    | 0  | 0  | Not-determined | Genome-fragment | NA | 0     | 0     |
| S9-final-viral-combined_k141_46865   | [full]      | 13864 | No  | NA    | 0  | 7  | Low-quality    | Genome-fragment | NA | 9.32  | 0     |
| S11-final-viral-combined_k141_192004 | [full]      | 13874 | No  | NA    | 1  | 0  | Low-quality    | Genome-fragment | NA | 12.5  | 0     |
| S8-final-viral-combined_k141_54754   | [full]      | 22989 | No  | NA    | 0  | 19 | Not-determined | Genome-fragment | NA | 0     | 0     |
| S8-final-viral-combined_k141_239802  | [full]      | 4245  | No  | NA    | 0  | 1  | Not-determined | Genome-fragment | NA | 0     | 0     |
| S11-final-viral-combined_k141_254703 | [full]      | 13884 | Yes | 11592 | 3  | 2  | Low-quality    | Genome-fragment | NA | 30.39 | 16.51 |
| S8-final-viral-combined_k141_88620   | [full]      | 1699  | No  | NA    | 0  | 0  | Not-determined | Genome-fragment | NA | 0     | 0     |
| S8-final-viral-combined_k141_720051  | [full]      | 3007  | No  | NA    | 0  | 0  | Not-determined | Genome-fragment | NA | 0     | 0     |
| S7-final-viral-combined_k141_37846   | [full]      | 13900 | No  | NA    | 10 | 0  | Low-quality    | Genome-fragment | NA | 28.33 | 0     |
| S8-final-viral-combined_k141_78166   | [full]      | 1313  | No  | NA    | 0  | 2  | Not-determined | Genome-fragment | NA | 0     | 0     |
| S8-final-viral-combined_k141_66432   | [full]      | 2117  | No  | NA    | 0  | 0  | Not-determined | Genome-fragment | NA | 0     | 0     |
| S8-final-viral-combined_k141_54783   | [full]      | 1344  | No  | NA    | 0  | 0  | Not-determined | Genome-fragment | NA | 0     | 0     |
| S2_k141_243335                       |             | 13901 | No  | NA    | 4  | 0  | Low-quality    | Genome-fragment | NA | 8.92  | 0     |
| S8-final-viral-combined_k141_100913  | [full]      | 2790  | No  | NA    | 0  | 1  | Not-determined | Genome-fragment | NA | 0     | 0     |
| S8-final-viral-combined_k141_123851  | [full]      | 1593  | No  | NA    | 0  | 0  | Not-determined | Genome-fragment | NA | 0     | 0     |
| S8-final-viral-combined_k141_158638  | [full]      | 1945  | No  | NA    | 0  | 0  | Not-determined | Genome-fragment | NA | 0     | 0     |
| S8-final-viral-combined_k141_260174  | [full]      | 3118  | No  | NA    | 0  | 3  | Not-determined | Genome-fragment | NA | 0     | 0     |
| S17-k141_252220                      |             | 13911 | No  | NA    | 0  | 1  | Low-quality    | Genome-fragment | NA | 12.44 | 0     |
| S8-final-viral-combined_k141_273503  | [full]      | 3000  | No  | NA    | 0  | 1  | Not-determined | Genome-fragment | NA | 0     | 0     |
| S8-final-viral-combined_k141_548231  | [full]      | 2925  | No  | NA    | 0  | 0  | Not-determined | Genome-fragment | NA | 0     | 0     |
| S8-final-viral-combined_k141_548231  | [full]      | 5419  | No  | NA    | 0  | 5  | Not-determined | Genome-fragment | NA | 0     | 0     |
| S8-final-viral-combined_k141_273521  | [full]      | 13824 | No  | NA    | 0  | 0  | Not-determined | Genome-fragment | NA | 0     | 0     |
| S8-final-viral-combined_k141_192963  | [full]      | 1602  | No  | NA    | 0  | 0  | Not-determined | Genome-fragment | NA | 0     | 0     |
| S8-final-viral-combined_k141_7740    | [full]      | 2914  | No  | NA    | 0  | 4  | Not-determined | Genome-fragment | NA | 0     | 0     |
| S9-final-viral-combined_k141_237915  | [full]      | 13917 | No  | NA    | 0  | 1  | Low-quality    | Genome-fragment | NA | 14.02 | 0     |
| S8-final-viral-combined_k141_260196  | [full]      | 2385  | No  | NA    | 0  | 0  | Not-determined | Genome-fragment | NA | 0     | 0     |
| S3-final-viral-combined_k141_40315   | [full]      | 19849 | No  | NA    | 3  | 1  | Low-quality    | Genome-fragment | NA | 9.51  | 0     |
| S8-final-viral-combined_k141_88668   | [full]      | 1608  | No  | NA    | 0  | 1  | Not-determined | Genome-fragment | NA | 0     | 0     |
| S8-final-viral-combined_k141_192969  | [full]      | 4624  | No  | NA    | 0  | 0  | Not-determined | Genome-fragment | NA | 0     | 0     |
| S8-final-viral-combined_k141_135901  | [full]      | 10517 | No  | NA    | 0  | 10 | Not-determined | Genome-fragment | NA | 0     | 0     |
| S8-final-viral-combined_k141_147624  | [full]      | 1741  | No  | NA    | 0  | 0  | Not-determined | Genome-fragment | NA | 0     | 0     |
| S8-final-viral-combined_k141_43506   | [full]      | 3749  | No  | NA    | 0  | 1  | Not-determined | Genome-fragment | NA | 0     | 0     |
| S8-final-viral-combined_k141_66488   | [full]      | 3525  | No  | NA    | 0  | 2  | Not-determined | Genome-fragment | NA | 0     | 0     |
| S8-final-viral-combined_k141_7787    | [full]      | 1063  | No  | NA    | 0  | 1  | Not-determined | Genome-fragment | NA | 0     | 0     |
| S8-final-viral-combined_k141_147642  | [full]      | 2968  | No  | NA    | 0  | 0  | Not-determined | Genome-fragment | NA | 0     | 0     |
| S8-final-viral-combined_k141_182538  | [full]      | 2178  | No  | NA    | 0  | 0  | Not-determined | Genome-fragment | NA | 0     | 0     |
| S8-final-viral-combined_k141_170057  | [full]      | 1107  | No  | NA    | 0  | 0  | Not-determined | Genome-fragment | NA | 0     | 0     |
| S8-final-viral-combined_k141_260139  | [full]      | 2008  | No  | NA    | 0  | 0  | Not-determined | Genome-fragment | NA | 0     | 0     |
| S11-final-viral-combined_k141_293182 | [O_partial] | 13950 | Yes | 9277  | 3  | 2  | Low-quality    | Genome-fragment | NA | 10.81 | 33.5  |
| S7-final-viral-combined_k141_168841  | [full]      | 13952 | No  | NA    | 1  | 2  | Low-quality    | Genome-fragment | NA | 20.03 | 0     |
| S8-final-viral-combined_k141_187401  | [full]      | 2784  | No  | NA    | 0  | 0  | Not-determined | Genome-fragment | NA | 0     | 0     |
| S17-final-viral-combined_k141_70457  | [full]      | 13957 | No  | NA    | 8  | 0  | Low-quality    | Genome-fragment | NA | 35.73 | 0     |
| S5-final-viral-combined_k141_2952    | [full]      | 13959 | No  | NA    | 10 | 0  | Low-quality    | Genome-fragment | NA | 34.36 | 0     |
| S8-final-viral-combined_k141_187521  | [full]      | 2511  | No  | NA    | 0  | 2  | Not-determined | Genome-fragment | NA | 0     | 0     |
| S11-final-viral-combined_k141_76187  | [full]      | 13970 | No  | NA    | 0  | 0  | Low-quality    | Genome-fragment | NA | 17.64 | 0     |
| S11-final-viral-combined_k141_248139 | [full]      | 13970 | No  | NA    | 1  | 9  | Low-quality    | Genome-fragment | NA | 8.99  | 0     |
| S8-final-viral-combined_k141_18769   | [full]      | 2468  | No  | NA    | 0  | 1  | Not-determined | Genome-fragment | NA | 0     | 0     |
| S8-final-viral-combined_k141_66566   | [full]      | 1144  | No  | NA    | 6  | 0  | Not-determined | Genome-fragment | NA | 0     | 0     |
| S11-final-viral-combined_k141_36015  | [full]      | 13976 | No  | NA    | 6  | 0  | Low-quality    | Genome-fragment | NA | 23.95 | 0     |
| S5-final-viral-combined_k141_179168  | [O_partial] | 13977 | No  | NA    | 0  | 6  | Low-quality    | Genome-fragment | NA | 14.88 | 0     |
| S8-final-viral-combined_k141_239915  | [full]      | 1262  | No  | NA    | 0  | 0  | Not-determined | Genome-fragment | NA | 0     | 0     |
| S5-final-viral-combined_k141_27009   | [O_partial] | 13978 | Yes | 9341  | 3  | 1  | Low-quality    | Genome-fragment | NA | 10.67 | 31.17 |
| S12-final-viral-combined_k141_378713 | [O_partial] | 13981 | No  | NA    | 1  | 4  | Low-quality    | Genome-fragment | NA | 35.89 | 0     |
| S8-final-viral-combined_k141_88800   | [full]      | 2379  | No  | NA    | 0  | 2  | Not-determined | Genome-fragment | NA | 0     | 0     |
| S8-final-viral-combined_k141_66607   | [full]      | 1394  | No  | NA    | 0  | 0  | Not-determined | Genome-fragment | NA | 0     | 0     |
| S8-final-viral-combined_k141_112034  | [full]      | 1729  | No  | NA    | 0  | 2  | Not-determined | Genome-fragment | NA | 0     | 0     |
| S8-final-viral-combined_k141_170181  | [full]      | 1938  | No  | NA    | 0  | 0  | Not-determined | Genome-fragment | NA | 0     | 0     |
| S1-final-viral-combined_k141_33070   | [full]      | 13992 | Yes | 12001 | 5  | 2  | Low-quality    | Genome-fragment | NA | 14.44 | 14.23 |
| S17-final-viral-combined_k141_50505  | [O_partial] | 13998 | No  | NA    | 1  | 3  | Low-quality    | Genome-fragment | NA | 8.78  | 0     |
| S8-final-viral-combined_k141_32769   | [full]      | 1617  | No  | NA    | 0  | 2  | Not-determined | Genome-fragment | NA | 0     | 0     |
| S8-final-viral-combined_k141_66624   | [full]      | 24713 | No  | NA    | 12 | 0  | Not-determined | Genome-fragment | NA | 0     | 0     |
| S8-final-viral-combined_k141_182740  | [full]      | 1977  | No  | NA    | 0  | 1  | Not-determined | Genome-fragment | NA | 0     | 0     |
| S8-final-viral-combined_k141_182741  | [full]      | 3969  | No  | NA    | 0  | 4  | Not-determined | Genome-fragment | NA | 0     | 0     |
| S8-final-viral-combined_k141_250737  | [full]      | 1290  | No  | NA    | 0  | 0  | Not-determined | Genome-fragment | NA | 0     | 0     |
| S8-final-viral-combined_k141_250740  | [full]      | 2484  | No  | NA    | 0  | 1  | Not-determined | Genome-fragment | NA | 0     | 0     |
| S17-final-viral-combined_k141_213306 | [full]      | 14002 | No  | NA    | 6  | 0  | Low-quality    | Genome-fragment | NA | 30.57 | 0     |
| S8-final-viral-combined_k141_203376  | [full]      | 2748  | No  | NA    | 0  | 1  | Not-determined | Genome-fragment | NA | 0     | 0     |
| S8-final-viral-combined_k141_260116  | [full]      | 1811  | No  | NA    | 0  | 0  | Not-determined | Genome-fragment | NA | 0     | 0     |
| S8-final-viral-combined_k141_227501  | [full]      | 1120  | No  | NA    | 0  | 1  | Not-determined | Genome-fragment | NA | 0     | 0     |
| S8-final-viral-combined_k141_18890   | [full]      | 2008  | No  | NA    | 0  | 2  | Not-determined | Genome-fragment | NA | 0     | 0     |
| S8-final-viral-combined_k141_66669   | [full]      | 2315  | No  | NA    | 0  | 0  | Not-determined | Genome-fragment | NA | 0     | 0     |
| S6-final-viral-combined_k141_7554    | [full]      | 14004 | No  | NA    | 6  | 1  | Low-quality    | Genome-fragment | NA | 18.84 | 0     |
| S7-final-viral-combined_k141_214665  | [full]      | 14006 | No  | NA    | 0  | 1  | Low-quality    | Genome-fragment | NA | 23.32 | 0     |
| S2-final-viral-combined_k141_32398   | [full]      | 14016 | No  | NA    | 7  | 0  | Low-quality    | Genome-fragment | NA | 34.38 | 0     |
| S6_k141_83556                        |             | 14023 | No  | NA    | 0  | 0  | Low-quality    | Genome-fragment | NA | 7.48  | 0     |
| S8-final-viral-combined_k141_147840  | [full]      | 1177  | No  | NA    | 0  | 0  | Not-determined | Genome-fragment | NA | 0     | 0     |
| S7-final-viral-combined_k141_60173   | [full]      | 14043 | No  | NA    | 1  | 12 | Low-quality    | Genome-fragment | NA | 8.4   | 0     |
| S1-final-viral-combined_k141_167801  | [full]      | 14027 | Yes | 5216  | 1  | 0  | Low-quality    | Genome-fragment | NA | 7.64  | 62.89 |
| S8-final-viral-combined_k141_273792  | [full]      | 2201  | No  | NA    | 0  | 0  | Not-determined | Genome-fragment | NA | 0     | 0     |
| S8-final-viral-combined_k141_170311  | [full]      | 4876  | No  | NA    | 0  | 2  | Not-determined | Genome-fragment | NA | 0     | 0     |
| S12_k141_320351                      |             | 14061 | No  | NA    | 0  | 0  | Low-quality    | Genome-fragment | NA | 27.3  | 0     |
| S2-final-viral-combined_k141_97494   | [full]      | 14061 | No  | NA    | 8  | 0  | Low-quality    | Genome-fragment | NA | 38.53 | 0     |
| S8-final-viral-combined_k141_216265  | [full]      | 7211  | No  | NA    | 0  | 5  | Not-determined | Genome-fragment | NA | 0     | 0     |
| S8-final-viral-combined_k141_250814  | [full]      | 2298  | No  | NA    | 0  | 2  | Not-determined | Genome-fragment | NA | 0     | 0     |
| S9-final-viral-combined_k141_78363   | [full]      | 14065 | No  | NA    | 0  | 0  | Low-quality    | Genome-fragment | NA | 35.99 | 0     |
| S8-final-viral-combined_k141_18970   | [full]      | 5564  | No  | NA    | 0  | 4  | Not-determined | Genome-fragment | NA | 0     | 0     |
| S8-final-viral-combined_k141_203376  | [full]      | 1713  | No  | NA    | 0  | 1  | Not-determined | Genome-fragment | NA | 0     | 0     |
| S2-final-viral-combined_k141_180391  | [full]      | 14065 | No  | NA    | 0  | 0  | Low-quality    | Genome-fragment | NA | 28.37 | 0     |
| S8-final-viral-combined_k141_101336  | [full]      | 1817  | No  | NA    | 0  | 0  | Not-determined | Genome-fragment | NA | 0     | 0     |
| S8-final-viral-combined_k141_112122  | [full]      | 4263  | No  | NA    | 0  | 4  | Not-determined | Genome-fragment | NA | 12.18 | 0     |
| S1-final-viral-combined_k141_175148  | [full]      | 14079 | Yes | 8387  | 0  | 4  | Low-quality    | Genome-fragment | NA | 40.43 | 0     |
| S8-final-viral-combined_k141_273845  | [full]      | 1457  | No  | NA    | 0  | 1  | Not-determined | Genome-fragment | NA | 0     | 0     |
| S7-final-viral-combined_k141_177981  | [full]      | 14095 | No  | NA    | 1  | 6  | Low-quality    | Genome-fragment | NA | 21.33 | 0     |
| S1-final-viral-combined_k141_286941  | [full]      | 14100 | No  | NA    | 3  | 2  | Low-quality    | Genome-fragment | NA | 34.51 | 0     |
| S8-final-viral-combined_k141_43890   | [full]      | 3059  | No  | NA    | 0  | 0  | Not-determined | Genome-fragment | NA | 0     | 0     |
| S8-final-viral-combined_k141_112240  | [full]      | 2241  | No  | NA    | 0  | 0  | Not-determined | Genome-fragment | NA | 0     | 0     |
| S1-final-viral-combined_k141_28946   | [full]      | 14105 | Yes | 9900  | 2  | 2  | Low-quality    | Genome-fragment | NA | 25.06 | 29.81 |
| S8-final-viral-combined_k141_273851  | [full]      | 1019  | No  | NA    | 0  | 0  | Not-determined | Genome-fragment | NA | 0     | 0     |
| S1-final-viral-combined_k141_264065  | [O_partial] | 14121 | No  | NA    | 0  | 6  | Low-quality    | Genome-fragment | NA | 13.08 | 0     |
| S8-final-viral-combined_k141_112252  | [full]      | 2513  | No  | NA    | 0  | 2  | Not-determined | Genome-fragment | NA | 0     | 0     |
| S12-final-viral-combined_k141_234947 | [O_partial] | 14124 | No  | NA    | 0  | 2  | Low-quality    | Genome-fragment | NA | 8.86  | 0     |
| S9-final-viral-combined_k141_16127   | [full]      | 14125 | Yes | 3595  | 3  | 6  | Low-quality    | Genome-fragment | NA | 8.91  | 74.55 |
| S8-final-viral-combined_k141_19071   | [full]      | 5556  | Yes | 3812  | 1  | 1  | Not-determined | Genome-fragment | NA | 31.39 | 0     |
| S11_k141_303288                      |             | 14126 | No  | NA    | 7  | 0  | Low-quality    | Genome-fragment | NA | 27.78 | 0     |
| S8-final-viral-combined_k141_124176  | [full]      | 2713  | No  | NA    | 0  | 2  | Not-determined | Genome-fragment | NA | 0     | 0     |
| S2-final-viral-combined_k141_115451  | [full]      | 14144 | No  | NA    | 1  | 6  | Low-quality    | Genome-fragment | NA | 1.14  | 0     |
| S8-final-viral-combined_k141_170435  | [full]      |       |     |       |    |    |                |                 |    |       |       |



|                                        |              |       |     |    |       |    |                |                 |                 |       |       |   |
|----------------------------------------|--------------|-------|-----|----|-------|----|----------------|-----------------|-----------------|-------|-------|---|
| S8-final-viral-combined_k141_136661    | [full]       | 1040  | No  | NA | 0     | 1  | Not-determined | Genome-fragment | NA              | 0     |       |   |
| S8_k141_121654                         |              | 14280 | No  | NA | 10    | 0  | 1              | Low-quality     | Genome-fragment | 27.77 | 0     |   |
| S8-final-viral-combined_k141_203875    | [full]       | 2548  | No  | NA | 0     | 0  | Not-determined | Genome-fragment | NA              | 0     |       |   |
| S8-final-viral-combined_k141_67115     | [full]       | 9630  | No  | NA | 0     | 2  | Not-determined | Genome-fragment | NA              | 0     |       |   |
| S8-final-viral-combined_k141_274139    | [full]       | 5319  | No  | NA | 0     | 2  | Not-determined | Genome-fragment | NA              | 0     |       |   |
| S11-final-viral-combined_k141_180333   | [full]       | 14292 | No  | NA | 0     | 4  | Low-quality    | Genome-fragment | NA              | 6.31  | 0     |   |
| S12-final-viral-combined_k141_219943   | [full]       | 14306 | No  | NA | 4     | 0  | Low-quality    | Genome-fragment | NA              | 27.28 | 0     |   |
| S8-final-viral-combined_k141_183294    | [full]       | 1624  | No  | NA | 0     | 2  | Not-determined | Genome-fragment | NA              | 17.59 | 0     |   |
| S5-final-viral-combined_k141_179162    | [full]       | 14310 | No  | NA | 5     | 0  | Not-determined | Genome-fragment | NA              | 0     |       |   |
| S8-final-viral-combined_k141_148332    | [full]       | 1236  | No  | NA | 0     | 2  | Not-determined | Genome-fragment | NA              | 0     |       |   |
| S8_k141_78538                          |              | 14334 | Yes | NA | 10402 | 2  | 2              | Low-quality     | Genome-fragment | 25.66 | 27.43 |   |
| S8-final-viral-combined_k141_216647    | [full]       | 3890  | No  | NA | 0     | 1  | Not-determined | Genome-fragment | NA              | 0     |       |   |
| S8-final-viral-combined_k141_170727    | [full]       | 6003  | No  | NA | 0     | 6  | Not-determined | Genome-fragment | NA              | 0     |       |   |
| S8-final-viral-combined_k141_228010    | [full]       | 5167  | No  | NA | 0     | 4  | Not-determined | Genome-fragment | NA              | 0     |       |   |
| S8-final-viral-combined_k141_8429      | [full]       | 1134  | No  | NA | 0     | 1  | Not-determined | Genome-fragment | NA              | 0     |       |   |
| S7-final-viral-combined_k141_200671    | [full]       | 14341 | No  | NA | 0     | 6  | Low-quality    | Genome-fragment | NA              | 33.83 | 0     |   |
| S8-final-viral-combined_k141_183351    | [full]       | 1531  | No  | NA | 0     | 1  | Not-determined | Genome-fragment | NA              | 0     |       |   |
| S11-final-viral-combined_k141_21419    | [full]       | 14358 | No  | NA | 10    | 0  | 0              | Low-quality     | Genome-fragment | 30.56 | 0     |   |
| S12-final-viral-combined_k141_165692   | [O, partial] | 14360 | No  | NA | 9727  | 2  | 3              | Low-quality     | Genome-fragment | 13.51 | 32.26 |   |
| S8-final-viral-combined_k141_55316     | [full]       | 1166  | No  | NA | 2     | 0  | 1              | Not-determined  | Genome-fragment | NA    | 0     |   |
| S8-final-viral-combined_k141_79032     | [full]       | 3692  | No  | NA | 0     | 2  | Not-determined | Genome-fragment | NA              | 0     |       |   |
| S9-final-viral-combined_k141_22573     | [full]       | 14381 | Yes | NA | 8310  | 2  | 4              | Low-quality     | Genome-fragment | 14.27 | 42.22 |   |
| S3_k141_71709                          |              | 14382 | No  | NA | 3     | 2  | Low-quality    | Genome-fragment | NA              | 13.77 | 0     |   |
| S8-final-viral-combined_k141_8462      | [full]       | 1024  | No  | NA | 0     | 1  | Not-determined | Genome-fragment | NA              | 0     |       |   |
| S8-final-viral-combined_k141_33391     | [full]       | 1672  | No  | NA | 0     | 2  | Not-determined | Genome-fragment | NA              | 0     |       |   |
| S1-final-viral-combined_k141_385431    | [full]       | 14302 | No  | NA | 6     | 0  | Low-quality    | Genome-fragment | NA              | 20.61 | 0     |   |
| S8-final-viral-combined_k141_260643    | [full]       | 2091  | No  | NA | 0     | 2  | Not-determined | Genome-fragment | NA              | 0     |       |   |
| S8-final-viral-combined_k141_251207    | [full]       | 4827  | No  | NA | 0     | 2  | Not-determined | Genome-fragment | NA              | 0     |       |   |
| S8-final-viral-combined_k141_55338     | [full]       | 1099  | No  | NA | 0     | 0  | Not-determined | Genome-fragment | NA              | 0     |       |   |
| S8-final-viral-combined_k141_148408    | [full]       | 2935  | No  | NA | 0     | 1  | Not-determined | Genome-fragment | NA              | 5.49  | 0     |   |
| S2-final-viral-combined_k141_105666    | [full]       | 14398 | No  | NA | 1     | 3  | Low-quality    | Genome-fragment | NA              | 21.79 | 0     |   |
| S8-final-viral-combined_k141_228080    | [full]       | 1721  | No  | NA | 1     | 5  | Low-quality    | Genome-fragment | NA              | 0     |       |   |
| S2-final-viral-combined_k141_167133    | [full]       | 14400 | No  | NA | 1     | 5  | Low-quality    | Genome-fragment | NA              | 0     |       |   |
| S8-final-viral-combined_k141_228091    | [full]       | 1244  | No  | NA | 0     | 1  | Not-determined | Genome-fragment | NA              | 9.4   | 58.56 |   |
| S2_k141_2569                           |              | 14400 | Yes | NA | 5968  | 4  | 5              | Low-quality     | Genome-fragment | 25.02 | 0     |   |
| S7-final-viral-combined_k141_177541    | [full]       | 14409 | No  | NA | 0     | 2  | Low-quality    | Genome-fragment | NA              | 0     |       |   |
| S8-final-viral-combined_k141_67166     | [full]       | 2618  | No  | NA | 0     | 1  | Not-determined | Genome-fragment | NA              | 0     |       |   |
| S8-final-viral-combined_k141_8516      | [full]       | 2545  | No  | NA | 0     | 1  | Not-determined | Genome-fragment | NA              | 23.96 | 0     |   |
| S2-final-viral-combined_k141_96816     | [full]       | 14410 | No  | NA | 5     | 0  | Low-quality    | Genome-fragment | NA              | 18.52 | 0     |   |
| S17_k141_156650                        |              | 14426 | No  | NA | 0     | 0  | Low-quality    | Genome-fragment | NA              | 7.13  | 22.43 |   |
| S11-final-viral-combined_k141_170745   | [O, partial] | 14434 | Yes | NA | 11196 | 2  | 2              | Low-quality     | Genome-fragment | 19.55 | 0     |   |
| S11-final-viral-combined_k141_109162   | [full]       | 14437 | No  | NA | 0     | 0  | Not-determined | Genome-fragment | NA              | 0     |       |   |
| S8-final-viral-combined_k141_136791    | [full]       | 2531  | No  | NA | 0     | 2  | Not-determined | Genome-fragment | NA              | 0     |       |   |
| S8-final-viral-combined_k141_251274    | [full]       | 1650  | No  | NA | 0     | 2  | Not-determined | Genome-fragment | NA              | 0     |       |   |
| S8-final-viral-combined_k141_260701    | [full]       | 4486  | No  | NA | 0     | 2  | Not-determined | Genome-fragment | NA              | 0     |       |   |
| S8-final-viral-combined_k141_159466    | [full]       | 2469  | No  | NA | 0     | 2  | Not-determined | Genome-fragment | NA              | 0     |       |   |
| S8-final-viral-combined_k141_148528    | [full]       | 1971  | No  | NA | 0     | 2  | Not-determined | Genome-fragment | NA              | 24.12 | 0     |   |
| S9_k141_91332                          |              | 14443 | No  | NA | 0     | 3  | Low-quality    | Genome-fragment | NA              | 0     |       |   |
| S8-final-viral-combined_k141_67224     | [full]       | 3453  | No  | NA | 0     | 2  | Not-determined | Genome-fragment | NA              | 0     |       |   |
| S8-final-viral-combined_k141_216867    | [full]       | 2802  | No  | NA | 0     | 2  | Not-determined | Genome-fragment | NA              | 0     |       |   |
| S8-final-viral-combined_k141_55457     | [full]       | 2978  | No  | NA | 0     | 1  | Not-determined | Genome-fragment | NA              | 0     |       |   |
| S8-final-viral-combined_k141_55462     | [full]       | 1548  | No  | NA | 0     | 1  | Not-determined | Genome-fragment | NA              | 0     |       |   |
| S8-final-viral-combined_k141_204063    | [full]       | 2543  | No  | NA | 0     | 1  | Not-determined | Genome-fragment | NA              | 0     |       |   |
| S7-final-viral-combined_k141_22609     | [full]       | 14448 | No  | NA | 10    | 1  | Low-quality    | Genome-fragment | NA              | 29.12 | 0     |   |
| S8-final-viral-combined_k141_240796    | [full]       | 1586  | No  | NA | 0     | 0  | Not-determined | Genome-fragment | NA              | 0     |       |   |
| S8-final-viral-combined_k141_170841    | [full]       | 2439  | No  | NA | 0     | 2  | Not-determined | Genome-fragment | NA              | 0     |       |   |
| S8-final-viral-combined_k141_67292     | [full]       | 1212  | No  | NA | 0     | 0  | Not-determined | Genome-fragment | NA              | 0     |       |   |
| S8-final-viral-combined_k141_159576    | [full]       | 4353  | No  | NA | 0     | 2  | Not-determined | Genome-fragment | NA              | 0     |       |   |
| S8-final-viral-combined_k141_148591    | [full]       | 2862  | No  | NA | 0     | 0  | Not-determined | Genome-fragment | NA              | 18.31 | 44.3  |   |
| S12-final-viral-combined_k141_373131   | [full]       | 14468 | Yes | NA | 8059  | 4  | 4              | Low-quality     | Genome-fragment | 0     |       |   |
| S8-final-viral-combined_k141_16632     | [full]       | 2906  | No  | NA | 0     | 0  | Not-determined | Genome-fragment | NA              | 0     |       |   |
| S8-final-viral-combined_k141_240488    | [full]       | 7093  | No  | NA | 0     | 3  | Not-determined | Genome-fragment | NA              | 0     |       |   |
| S8-final-viral-combined_k141_251332    | [full]       | 6794  | No  | NA | 0     | 1  | Not-determined | Genome-fragment | NA              | 0     |       |   |
| S8-final-viral-combined_k141_101824    | [full]       | 2968  | No  | NA | 0     | 3  | Not-determined | Genome-fragment | NA              | 0     |       |   |
| S4_k141_69863                          |              | 14481 | No  | NA | 5     | 1  | Low-quality    | Genome-fragment | NA              | 26.52 | 0     |   |
| S8-final-viral-combined_k141_19657     | [full]       | 2358  | No  | NA | 0     | 2  | Not-determined | Genome-fragment | NA              | 0     |       |   |
| S8-final-viral-combined_k141_193866    | [full]       | 3344  | No  | NA | 0     | 2  | Not-determined | Genome-fragment | NA              | 0     |       |   |
| S8-final-viral-combined_k141_55559     | [full]       | 3372  | No  | NA | 0     | 3  | Not-determined | Genome-fragment | NA              | 0     |       |   |
| S8-final-viral-combined_k141_101869    | [full]       | 8710  | No  | NA | 0     | 0  | Not-determined | Genome-fragment | NA              | 0     |       |   |
| S8-final-viral-combined_k141_79337     | [full]       | 1532  | No  | NA | 0     | 0  | Not-determined | Genome-fragment | NA              | 5.42  | 0     |   |
| S1_k141_150429                         |              | 14491 | No  | NA | 0     | 7  | Low-quality    | Genome-fragment | NA              | 0     |       |   |
| S1-final-viral-combined_k141_46244     | [O, partial] | 14510 | Yes | NA | 11168 | 3  | 1              | Low-quality     | Genome-fragment | 40.55 | 23.03 |   |
| S8-final-viral-combined_k141_63641     | [full]       | 14515 | No  | NA | 2     | 1  | Low-quality    | Genome-fragment | NA              | 0     |       |   |
| S8-final-viral-combined_k141_148736    | [full]       | 2878  | No  | NA | 0     | 2  | Not-determined | Genome-fragment | NA              | 0     |       |   |
| S8-final-viral-combined_k141_112930    | [full]       | 1765  | No  | NA | 0     | 2  | Not-determined | Genome-fragment | NA              | 0     |       |   |
| S8-final-viral-combined_k141_193922    | [full]       | 2379  | No  | NA | 0     | 2  | Not-determined | Genome-fragment | NA              | 0     |       |   |
| S8-final-viral-combined_k141_159705    | [full]       | 1705  | No  | NA | 0     | 1  | Not-determined | Genome-fragment | NA              | 0     |       |   |
| S8-final-viral-combined_k141_251394    | [full]       | 8461  | No  | NA | 0     | 7  | Not-determined | Genome-fragment | NA              | 8.97  | 0     |   |
| S11-final-viral-combined_k141_119802   | [O, partial] | 14518 | No  | NA | 1     | 1  | Low-quality    | Genome-fragment | NA              | 31.91 | 0     |   |
| S1_k141_238579                         |              | 14523 | No  | NA | 3     | 0  | Low-quality    | Genome-fragment | NA              | 23.04 | 0     |   |
| S2-final-viral-combined_k141_119517    | [full]       | 14547 | No  | NA | 5     | 1  | Low-quality    | Genome-fragment | NA              | 27.3  | 0     |   |
| S12_k141_373608                        |              | 14548 | No  | NA | 10    | 0  | 1              | Not-determined  | Genome-fragment | NA    | 0     |   |
| S8-final-viral-combined_k141_183713    | [full]       | 1279  | No  | NA | 0     | 1  | Not-determined | Genome-fragment | NA              | 18.46 | 0     |   |
| S7-final-viral-combined_k141_111548    | [full]       | 14565 | No  | NA | 3     | 1  | Low-quality    | Genome-fragment | NA              | 25.04 | 27.24 |   |
| S17-final-viral-combined_k141_190763   | [full]       | 14569 | Yes | NA | 10601 | 0  | 0              | Low-quality     | Genome-fragment | 26.37 | 0     |   |
| S2_k141_130220                         |              | 14572 | No  | NA | 7     | 0  | Low-quality    | Genome-fragment | NA              | 6.26  | 0     |   |
| S2-final-viral-combined_k141_119169    | [full]       | 14579 | No  | NA | 0     | 12 | Low-quality    | Genome-fragment | NA              | 24.16 | 0     |   |
| S11-final-viral-combined_k141_209542   | [full]       | 14591 | No  | NA | 7     | 0  | Low-quality    | Genome-fragment | NA              | 33.85 | 0     |   |
| S2-final-viral-combined_k141_185186    | [full]       | 14624 | No  | NA | 0     | 2  | Not-determined | Genome-fragment | NA              | 0     |       |   |
| S8-final-viral-combined_k141_79453     | [full]       | 6164  | No  | NA | 0     | 2  | Not-determined | Genome-fragment | NA              | 0     |       |   |
| S8-final-viral-combined_k141_124919    | [full]       | 2150  | No  | NA | 0     | 3  | Not-determined | Genome-fragment | NA              | 0     |       |   |
| S8-final-viral-combined_k141_194031    | [full]       | 1876  | No  | NA | 0     | 2  | Not-determined | Genome-fragment | NA              | 0     |       |   |
| S8-final-viral-combined_k141_148851    | [full]       | 1510  | No  | NA | 0     | 1  | Not-determined | Genome-fragment | NA              | 1.12  | 74.99 |   |
| S8-final-viral-combined_k141_148854    | [full]       | 2120  | No  | NA | 0     | 1  | Not-determined | Genome-fragment | NA              | 32.06 | 0     |   |
| S12_k141_157923                        |              | 14625 | No  | NA | 3657  | 9  | 0              | Low-quality     | Genome-fragment | 17.43 | 0     |   |
| S11_k141_314239                        |              | 14632 | No  | NA | 4     | 2  | Low-quality    | Genome-fragment | NA              | 0     |       |   |
| S11-final-viral-combined_k141_322838   | [full]       | 14636 | No  | NA | 0     | 2  | Not-determined | Genome-fragment | NA              | 0     |       |   |
| S8-final-viral-combined_k141_44758     | [full]       | 4193  | No  | NA | 0     | 1  | Not-determined | Genome-fragment | NA              | 8.66  | 0     |   |
| S8-final-viral-combined_k141_138241    | [full]       | 3728  | No  | NA | 0     | 1  | Not-determined | Genome-fragment | NA              | 0     |       |   |
| S8-final-viral-combined_k141_124995    | [full]       | 2745  | No  | NA | 0     | 2  | Low-quality    | Genome-fragment | NA              | 0     |       |   |
| S11-final-viral-combined_k141_28478    | [full]       | 14641 | No  | NA | 1     | 2  | Low-quality    | Genome-fragment | NA              | 41.48 | 0     |   |
| S2-final-viral-combined_k141_316610    | [full]       | 14672 | No  | NA | 1     | 0  | Low-quality    | Genome-fragment | NA              | 0     |       |   |
| S9-final-viral-combined_k141_61803     | [full]       | 14691 | No  | NA | 4     | 0  | Low-quality    | Genome-fragment | NA              | 11.18 | 0     |   |
| S8-final-viral-combined_k141_89952     | [full]       | 2956  | No  | NA | 0     | 2  | Not-determined | Genome-fragment | NA              | 25.25 | 0     |   |
| S8-final-viral-combined_k141_199241    | [full]       | 4771  | No  | NA | 1     | 0  | Not-determined | Genome-fragment | NA              | 0     |       |   |
| S8-final-viral-combined_k141_274284    | [full]       | 2837  | No  | NA | 0     | 1  | Not-determined | Genome-fragment | NA              | 0     |       |   |
| S8-final-viral-combined_k141_241168    | [full]       | 1178  | No  | NA | 0     | 0  | Not-determined | Genome-fragment | NA              | 5.6   | 0     |   |
| S7_k141_56098                          |              | 14691 | No  | NA | 4     | 6  | Low-quality    | Genome-fragment | NA              | 37.16 | 0     |   |
| S2-final-viral-combined_k141_166548    | [full]       | 14721 | No  | NA | 0     | 1  | Not-determined | Genome-fragment | NA              | 0     |       |   |
| S8-final-viral-combined_k141_274314    | [full]       | 2763  | No  | NA | 0     | 0  | Not-determined | Genome-fragment | NA              | 9.92  | 0     |   |
| S8-final-viral-combined_k141_8768      | [full]       | 1104  | No  | NA | 0     | 0  | Not-determined | Genome-fragment | NA              | 0     |       |   |
| S9_k141_25087                          |              | 14745 | No  | NA | 0     | 7  | Low-quality    | Genome-fragment | NA              | 0     |       |   |
| S8-final-viral-combined_k141_216978    | [full]       | 1586  | No  | NA | 0     | 1  | Not-determined | Genome-fragment | NA              | 0     |       |   |
| S8-final-viral-combined_k141_14080     | [full]       | 14753 | No  | NA | 1     | 2  | Low-quality    | Genome-fragment | NA              | 11.18 | 0     |   |
| S12_k141_352472                        |              | 14758 | No  | NA | 8     | 0  | 2              | Not-determined  | Genome-fragment | NA    | 15.25 | 0 |
| S8-final-viral-combined_k141_55789     | [full]       | 1712  | No  | NA | 0     | 1  | Low-quality    | Genome-fragment | NA              | 16.57 | 0     |   |
| S5-final-viral-combined_k141_175353    | [full]       | 14760 | No  | NA | 1     | 0  | Low-quality    | Genome-fragment | NA              | 42.54 | 0     |   |
| S11-final-viral-combined_k141_247486   | [full]       | 14763 | No  | NA | 6     | 2  | Not-determined | Genome-fragment | NA              | 13.62 | 34.63 |   |
| S8-final-viral-combined_k141_228512    | [full]       | 1518  | No  | NA | 0     | 1  | Not-determined | Genome-fragment | NA              | 4.18  | 0     |   |
| S8-final-viral-combined_k141_20010     | [full]       | 1833  | No  | NA | 0     | 3  | Low-quality    | Genome-fragment | NA              | 27.23 | 0     |   |
| S1-final-viral-combined_k141_154009    | [O, partial] | 14766 | Yes | NA | 9652  | 2  | 3              | Low-quality     | Genome-fragment | 0     |       |   |
| S8-final-viral-combined_k141_175448    | [full]       | 14777 | No  | NA | 0     | 7  | Low-quality    | Genome-fragment | NA              | 0     |       |   |
| S12-final-viral-combined_k141_259497</ |              |       |     |    |       |    |                |                 |                 |       |       |   |



|                                      |             |       |     |      |    |    |                |                 |    |       |       |
|--------------------------------------|-------------|-------|-----|------|----|----|----------------|-----------------|----|-------|-------|
| S8-final-viral-combined_k141_113451  | [full]      | 1160  | No  | NA   | 0  | 1  | Not-determined | Genome-fragment | NA | 0     |       |
| S3-final-viral-combined_k141_20070   | [full]      | 15007 | No  | NA   | 1  | 0  | Low-quality    | Genome-fragment | NA | 10.14 | 0     |
| S4-final-viral-combined_k141_146670  | [full]      | 15025 | No  | NA   | 0  | 2  | Low-quality    | Genome-fragment | NA | 22.73 | 0     |
| S8-final-viral-combined_k141_45254   | [full]      | 1400  | No  | NA   | 0  | 0  | Not-determined | Genome-fragment | NA | 0     | 0     |
| S8-final-viral-combined_k141_34165   | [full]      | 1514  | No  | NA   | 0  | 2  | Not-determined | Genome-fragment | NA | 0     | 0     |
| S8-final-viral-combined_k141_194408  | [full]      | 3563  | No  | NA   | 0  | 3  | Not-determined | Genome-fragment | NA | 0     | 0     |
| S8-final-viral-combined_k141_45281   | [full]      | 1809  | No  | NA   | 0  | 2  | Not-determined | Genome-fragment | NA | 0     | 0     |
| S8-final-viral-combined_k141_56094   | [full]      | 3254  | No  | NA   | 0  | 2  | Not-determined | Genome-fragment | NA | 30.65 | 0     |
| S11-final-viral-combined_k141_294846 | [full]      | 15016 | No  | NA   | 0  | 0  | Low-quality    | Genome-fragment | NA | 6.77  | 0     |
| S11-final-viral-combined_k141_244786 | [0_partial] | 15027 | No  | NA   | 2  | 1  | Low-quality    | Genome-fragment | NA | 0     | 0     |
| S8-final-viral-combined_k141_160105  | [full]      | 1966  | No  | NA   | 0  | 1  | Not-determined | Genome-fragment | NA | 0     | 0     |
| S8-final-viral-combined_k141_56117   | [full]      | 6110  | No  | NA   | 0  | 4  | Not-determined | Genome-fragment | NA | 0     | 0     |
| S8-final-viral-combined_k141_102407  | [full]      | 1569  | No  | NA   | 0  | 2  | Not-determined | Genome-fragment | NA | 0     | 0     |
| S8-final-viral-combined_k141_137618  | [full]      | 2061  | No  | NA   | 0  | 2  | Not-determined | Genome-fragment | NA | 0     | 0     |
| S8-final-viral-combined_k141_274675  | [full]      | 4104  | No  | NA   | 0  | 3  | Not-determined | Genome-fragment | NA | 0     | 0     |
| S11_k141_278866                      | [full]      | 15012 | No  | NA   | 0  | 0  | Low-quality    | Genome-fragment | NA | 36.71 | 0     |
| S8-final-viral-combined_k141_45336   | [full]      | 1074  | No  | NA   | 0  | 0  | Not-determined | Genome-fragment | NA | 0     | 0     |
| S2-final-viral-combined_k141_125151  | [full]      | 15034 | No  | NA   | 9  | 0  | Low-quality    | Genome-fragment | NA | 37.01 | 0     |
| S8-final-viral-combined_k141_68078   | [full]      | 3499  | No  | NA   | 0  | 2  | Not-determined | Genome-fragment | NA | 0     | 0     |
| S8-final-viral-combined_k141_137659  | [full]      | 1199  | No  | NA   | 0  | 0  | Not-determined | Genome-fragment | NA | 0     | 0     |
| S8-final-viral-combined_k141_90466   | [full]      | 2278  | No  | NA   | 0  | 3  | Not-determined | Genome-fragment | NA | 0     | 0     |
| S8-final-viral-combined_k141_184594  | [full]      | 2278  | No  | NA   | 0  | 3  | Not-determined | Genome-fragment | NA | 0     | 0     |
| S8-final-viral-combined_k141_160163  | [full]      | 2360  | No  | NA   | 0  | 2  | Not-determined | Genome-fragment | NA | 0     | 0     |
| S7-final-viral-combined_k141_233162  | [full]      | 15055 | No  | NA   | 1  | 5  | Low-quality    | Genome-fragment | NA | 22.78 | 0     |
| S5-final-viral-combined_k141_131113  | [full]      | 15062 | Yes | 7339 | 5  | 7  | Low-quality    | Genome-fragment | NA | 15.79 | 51.27 |
| S8-final-viral-combined_k141_194523  | [full]      | 3213  | No  | NA   | 0  | 1  | Not-determined | Genome-fragment | NA | 0     | 0     |
| S8-final-viral-combined_k141_45387   | [full]      | 1392  | No  | NA   | 0  | 2  | Not-determined | Genome-fragment | NA | 0     | 0     |
| S8-final-viral-combined_k141_149454  | [full]      | 2924  | No  | NA   | 0  | 1  | Not-determined | Genome-fragment | NA | 0     | 0     |
| S8_k141_272748                       | [full]      | 15084 | No  | NA   | 0  | 2  | Low-quality    | Genome-fragment | NA | 19.27 | 0     |
| S8-final-viral-combined_k141_68155   | [full]      | 1066  | No  | NA   | 0  | 0  | Not-determined | Genome-fragment | NA | 0     | 0     |
| S8-final-viral-combined_k141_194553  | [full]      | 2806  | No  | NA   | 0  | 1  | Not-determined | Genome-fragment | NA | 0     | 0     |
| S8-final-viral-combined_k141_274147  | [full]      | 1406  | No  | NA   | 0  | 1  | Not-determined | Genome-fragment | NA | 0     | 0     |
| S8-final-viral-combined_k141_90502   | [full]      | 27579 | No  | NA   | 0  | 21 | Not-determined | Genome-fragment | NA | 0     | 0     |
| S9_k141_2318                         | [full]      | 15131 | No  | NA   | 11 | 0  | Low-quality    | Genome-fragment | NA | 33.66 | 0     |
| S8-final-viral-combined_k141_184270  | [full]      | 2281  | No  | NA   | 0  | 1  | Not-determined | Genome-fragment | NA | 0     | 0     |
| S8-final-viral-combined_k141_3157    | [full]      | 1601  | No  | NA   | 0  | 0  | Not-determined | Genome-fragment | NA | 0     | 0     |
| S7-final-viral-combined_k141_23111   | [full]      | 15133 | No  | NA   | 7  | 0  | Low-quality    | Genome-fragment | NA | 30.45 | 0     |
| S8-final-viral-combined_k141_204705  | [full]      | 3663  | No  | NA   | 0  | 1  | Not-determined | Genome-fragment | NA | 0     | 0     |
| S8-final-viral-combined_k141_68191   | [full]      | 1267  | No  | NA   | 0  | 0  | Not-determined | Genome-fragment | NA | 0     | 0     |
| S1_k141_368784                       | [full]      | 15135 | No  | NA   | 1  | 3  | Low-quality    | Genome-fragment | NA | 29.57 | 0     |
| S8-final-viral-combined_k141_252017  | [full]      | 6164  | No  | NA   | 0  | 1  | Not-determined | Genome-fragment | NA | 0     | 0     |
| S8-final-viral-combined_k141_90521   | [full]      | 7102  | No  | NA   | 0  | 0  | Not-determined | Genome-fragment | NA | 0     | 0     |
| S8-final-viral-combined_k141_171585  | [full]      | 1859  | No  | NA   | 0  | 2  | Not-determined | Genome-fragment | NA | 0     | 0     |
| S17-k141_87167                       | [full]      | 15141 | No  | NA   | 0  | 9  | Low-quality    | Genome-fragment | NA | 6.11  | 0     |
| S1-final-viral-combined_k141_379515  | [0_partial] | 15161 | Yes | 3077 | 2  | 4  | Low-quality    | Genome-fragment | NA | 2.27  | 79.7  |
| S7-final-viral-combined_k141_121474  | [full]      | 15166 | No  | NA   | 11 | 0  | Low-quality    | Genome-fragment | NA | 31.65 | 0     |
| S1_k141_259291                       | [full]      | 15174 | No  | NA   | 10 | 0  | Low-quality    | Genome-fragment | NA | 25.4  | 0     |
| S8-final-viral-combined_k141_217369  | [full]      | 1352  | No  | NA   | 0  | 2  | Not-determined | Genome-fragment | NA | 0     | 0     |
| S8-final-viral-combined_k141_274815  | [full]      | 1508  | No  | NA   | 0  | 0  | Not-determined | Genome-fragment | NA | 0     | 0     |
| S8-final-viral-combined_k141_21913   | [full]      | 4662  | No  | NA   | 0  | 3  | Not-determined | Genome-fragment | NA | 0     | 0     |
| S7-final-viral-combined_k141_23246   | [0_partial] | 15208 | Yes | 4615 | 2  | 5  | Low-quality    | Genome-fragment | NA | 12.58 | 69.65 |
| S8-final-viral-combined_k141_345370  | [full]      | 6568  | No  | NA   | 0  | 2  | Not-determined | Genome-fragment | NA | 0     | 0     |
| S7_k141_227845                       | [full]      | 15216 | No  | NA   | 1  | 4  | Low-quality    | Genome-fragment | NA | 18.75 | 0     |
| S9_k141_72652                        | [full]      | 15239 | No  | NA   | 12 | 0  | Low-quality    | Genome-fragment | NA | 36.64 | 0     |
| S8-final-viral-combined_k141_217390  | [full]      | 1178  | No  | NA   | 0  | 0  | Not-determined | Genome-fragment | NA | 0     | 0     |
| S8-final-viral-combined_k141_20305   | [full]      | 1872  | No  | NA   | 0  | 0  | Not-determined | Genome-fragment | NA | 0     | 0     |
| S8-final-viral-combined_k141_68750   | [full]      | 15248 | No  | NA   | 1  | 8  | Low-quality    | Genome-fragment | NA | 25.76 | 0     |
| S8-final-viral-combined_k141_204807  | [full]      | 4000  | No  | NA   | 0  | 3  | Not-determined | Genome-fragment | NA | 15.12 | 0     |
| S8-final-viral-combined_k141_100540  | [full]      | 15303 | No  | NA   | 2  | 0  | Low-quality    | Genome-fragment | NA | 19.06 | 0     |
| S2_k141_120870                       | [full]      | 15319 | No  | NA   | 10 | 2  | Low-quality    | Genome-fragment | NA | 0     | 0     |
| S8-final-viral-combined_k141_125462  | [full]      | 2112  | No  | NA   | 0  | 0  | Not-determined | Genome-fragment | NA | 0     | 0     |
| S8-final-viral-combined_k141_274912  | [full]      | 1748  | No  | NA   | 0  | 1  | Not-determined | Genome-fragment | NA | 0     | 0     |
| S8-final-viral-combined_k141_194696  | [full]      | 8192  | No  | NA   | 0  | 1  | Not-determined | Genome-fragment | NA | 0     | 0     |
| S1-final-viral-combined_k141_221025  | [0_partial] | 15321 | No  | NA   | 0  | 9  | Low-quality    | Genome-fragment | NA | 20.74 | 0     |
| S8-final-viral-combined_k141_68334   | [full]      | 6008  | No  | NA   | 3  | 3  | Not-determined | Genome-fragment | NA | 0     | 0     |
| S8-final-viral-combined_k141_90674   | [full]      | 21396 | No  | NA   | 0  | 0  | Not-determined | Genome-fragment | NA | 0     | 0     |
| S8-final-viral-combined_k141_217468  | [full]      | 1553  | No  | NA   | 0  | 0  | Not-determined | Genome-fragment | NA | 0     | 0     |
| S8-final-viral-combined_k141_90677   | [full]      | 3492  | No  | NA   | 0  | 3  | Not-determined | Genome-fragment | NA | 0     | 0     |
| S4-final-viral-combined_k141_26399   | [full]      | 15324 | No  | NA   | 0  | 0  | Low-quality    | Genome-fragment | NA | 35.78 | 0     |
| S8-final-viral-combined_k141_204902  | [full]      | 4870  | No  | NA   | 0  | 3  | Not-determined | Genome-fragment | NA | 0     | 0     |
| S8-final-viral-combined_k141_252184  | [full]      | 2016  | No  | NA   | 0  | 0  | Not-determined | Genome-fragment | NA | 0     | 0     |
| S8-final-viral-combined_k141_171708  | [full]      | 2745  | No  | NA   | 0  | 0  | Not-determined | Genome-fragment | NA | 0     | 0     |
| S3_k141_45917                        | [full]      | 15325 | No  | NA   | 1  | 0  | Low-quality    | Genome-fragment | NA | 8.98  | 0     |
| S8-final-viral-combined_k141_9324    | [full]      | 1174  | No  | NA   | 0  | 0  | Not-determined | Genome-fragment | NA | 0     | 0     |
| S8-final-viral-combined_k141_274974  | [full]      | 2532  | No  | NA   | 0  | 3  | Not-determined | Genome-fragment | NA | 0     | 0     |
| S8-final-viral-combined_k141_20404   | [full]      | 3776  | No  | NA   | 0  | 3  | Not-determined | Genome-fragment | NA | 0     | 0     |
| S8-final-viral-combined_k141_102656  | [full]      | 3516  | No  | NA   | 0  | 1  | Not-determined | Genome-fragment | NA | 0     | 0     |
| S8-final-viral-combined_k141_160466  | [full]      | 4428  | No  | NA   | 0  | 1  | Not-determined | Genome-fragment | NA | 0     | 0     |
| S8-final-viral-combined_k141_241637  | [full]      | 1221  | No  | NA   | 0  | 0  | Not-determined | Genome-fragment | NA | 0     | 0     |
| S1-final-viral-combined_k141_287155  | [full]      | 15330 | No  | NA   | 0  | 0  | Low-quality    | Genome-fragment | NA | 25.97 | 0     |
| S8-final-viral-combined_k141_252130  | [full]      | 4443  | No  | NA   | 0  | 2  | Not-determined | Genome-fragment | NA | 0     | 0     |
| S8-final-viral-combined_k141_194761  | [full]      | 1462  | No  | NA   | 0  | 1  | Not-determined | Genome-fragment | NA | 0     | 0     |
| S5-final-viral-combined_k141_126730  | [full]      | 15341 | No  | NA   | 0  | 1  | Low-quality    | Genome-fragment | NA | 17.61 | 0     |
| S12_k141_135169                      | [full]      | 15344 | Yes | 9544 | 2  | 2  | Low-quality    | Genome-fragment | NA | 14.79 | 37.8  |
| S8-final-viral-combined_k141_275001  | [full]      | 2898  | No  | NA   | 0  | 3  | Not-determined | Genome-fragment | NA | 0     | 0     |
| S8-final-viral-combined_k141_90781   | [full]      | 2191  | No  | NA   | 0  | 2  | Not-determined | Genome-fragment | NA | 0     | 0     |
| S8-final-viral-combined_k141_45688   | [full]      | 1643  | No  | NA   | 0  | 2  | Not-determined | Genome-fragment | NA | 0     | 0     |
| S6_k141_3027                         | [full]      | 15363 | No  | NA   | 2  | 0  | Low-quality    | Genome-fragment | NA | 8.36  | 0     |
| S5-final-viral-combined_k141_165363  | [full]      | 15364 | Yes | 8023 | 2  | 0  | Low-quality    | Genome-fragment | NA | 8.51  | 47.78 |
| S8-final-viral-combined_k141_275013  | [full]      | 4221  | No  | NA   | 0  | 2  | Not-determined | Genome-fragment | NA | 0     | 0     |
| S8-final-viral-combined_k141_68474   | [full]      | 2048  | No  | NA   | 0  | 1  | Not-determined | Genome-fragment | NA | 0     | 0     |
| S8-final-viral-combined_k141_113787  | [full]      | 3900  | No  | NA   | 0  | 3  | Not-determined | Genome-fragment | NA | 0     | 0     |
| S12_k141_253276                      | [full]      | 15367 | No  | NA   | 0  | 5  | Low-quality    | Genome-fragment | NA | 15.02 | 0     |
| S8-final-viral-combined_k141_229048  | [full]      | 2324  | No  | NA   | 0  | 1  | Not-determined | Genome-fragment | NA | 0     | 0     |
| S11_k141_276128                      | [full]      | 15405 | No  | NA   | 0  | 0  | Low-quality    | Genome-fragment | NA | 25.44 | 0     |
| S11-final-viral-combined_k141_291057 | [full]      | 15406 | No  | NA   | 12 | 0  | Low-quality    | Genome-fragment | NA | 40.33 | 0     |
| S1-final-viral-combined_k141_28652   | [full]      | 15408 | No  | NA   | 0  | 0  | Low-quality    | Genome-fragment | NA | 24.91 | 0     |
| S12_k141_277191                      | [full]      | 15413 | No  | NA   | 4  | 0  | Low-quality    | Genome-fragment | NA | 20.49 | 0     |
| S2-final-viral-combined_k141_91443   | [full]      | 15418 | Yes | 9073 | 1  | 0  | Low-quality    | Genome-fragment | NA | 23.01 | 41.5  |
| S8-final-viral-combined_k141_252272  | [full]      | 2116  | No  | NA   | 0  | 2  | Not-determined | Genome-fragment | NA | 0     | 0     |
| S8-final-viral-combined_k141_90881   | [full]      | 2521  | No  | NA   | 0  | 0  | Not-determined | Genome-fragment | NA | 0     | 0     |
| S1-final-viral-combined_k141_246540  | [0_partial] | 15421 | No  | NA   | 0  | 1  | Low-quality    | Genome-fragment | NA | 18.74 | 0     |
| S8-final-viral-combined_k141_229099  | [full]      | 1409  | No  | NA   | 1  | 0  | Not-determined | Genome-fragment | NA | 0     | 0     |
| S5-final-viral-combined_k141_192791  | [full]      | 15467 | No  | NA   | 2  | 1  | Low-quality    | Genome-fragment | NA | 23.33 | 0     |
| S8-final-viral-combined_k141_229104  | [full]      | 1465  | No  | NA   | 0  | 2  | Not-determined | Genome-fragment | NA | 0     | 0     |
| S8-final-viral-combined_k141_275068  | [full]      | 2819  | No  | NA   | 0  | 1  | Not-determined | Genome-fragment | NA | 0     | 0     |
| S8-final-viral-combined_k141_241778  | [full]      | 3163  | No  | NA   | 0  | 0  | Not-determined | Genome-fragment | NA | 0     | 0     |
| S1-final-viral-combined_k141_364547  | [full]      | 15471 | No  | NA   | 1  | 1  | Low-quality    | Genome-fragment | NA | 9.86  | 0     |
| S8-final-viral-combined_k141_3021    | [0_partial] | 15475 | No  | NA   | 0  | 0  | Low-quality    | Genome-fragment | NA | 6.83  | 0     |
| S8-final-viral-combined_k141_125691  | [full]      | 1317  | No  | NA   | 0  | 1  | Not-determined | Genome-fragment | NA | 10.6  | 0     |
| S5-final-viral-combined_k141_119787  | [full]      | 15481 | No  | NA   | 1  | 6  | Low-quality    | Genome-fragment | NA | 34.79 | 0     |
| S8-final-viral-combined_k141_38748   | [full]      | 15481 | No  | NA   | 15 | 0  | Low-quality    | Genome-fragment | NA | 40.6  | 0     |
| S17-final-viral-combined_k141_91500  | [full]      | 15491 | No  | NA   | 7  | 0  | Low-quality    | Genome-fragment | NA | 36.43 | 0     |
| S8-final-viral-combined_k141_179662  | [full]      | 15504 | No  | NA   | 0  | 1  | Low-quality    | Genome-fragment | NA | 0     | 0     |
| S8-final-viral-combined_k141_125721  | [full]      | 2488  | No  | NA   | 0  | 1  | Not-determined | Genome-fragment | NA | 0     | 0     |
| S8-final-viral-combined_k141_149670  | [full]      | 2081  | No  | NA   | 0  | 2  | Not-determined | Genome-fragment | NA | 0     | 0     |
| S12-final-viral-combined_k141_72985  | [full]      | 15509 | No  | NA   | 2  | 2  | Low-quality    | Genome-fragment | NA | 28.24 | 0     |
| S7-final-viral-combined_k141_20704   | [full]      | 15515 | No  | NA   | 1  | 1  | Low-quality    | Genome-fragment | NA | 13.45 | 0     |
| S4-final-viral-combined_k141_104993  | [full]      | 15535 | No  | NA   | 0  | 0  | Not-determined | Genome-fragment | NA | 5.99  | 0     |
| S8-final-viral-combined_k141_9507    | [full]      | 2149  | No  | NA   | 0  | 1  | Not-determined | Genome-fragment | NA | 0     | 0     |
| S11-final-viral-combined_k141_255798 | [full]      | 15548 | No  | NA   | 0  | 5  | Low-quality    | Genome-fragment | NA | 37.34 | 0     |
| S8-final-viral-combined_k141_27516   |             |       |     |      |    |    |                |                 |    |       |       |



|                                      |             |       |     |       |       |    |                  |                 |    |       |       |
|--------------------------------------|-------------|-------|-----|-------|-------|----|------------------|-----------------|----|-------|-------|
| S8-final-viral-combined_k141_114150  | [full]      | 24125 | No  | NA    | 0     | 14 | Not-determined   | Genome-fragment | NA |       | 0     |
| S6-final-viral-combined_k141_76252   | [full]      | 15751 | No  | NA    | 11    | 0  | Low-quality      | Genome-fragment | NA | 32.68 | 0     |
| S8-final-viral-combined_k141_56874   | [full]      | 1381  | No  | NA    | 0     | 0  | Not-determined   | Genome-fragment | NA | 0     | 0     |
| S12-final-viral-combined_k141_160344 | [full]      | 15764 | No  | NA    | 7     | 1  | Low-quality      | Genome-fragment | NA | 24.42 | 0     |
| S8-final-viral-combined_k141_91399   | [full]      | 1915  | No  | NA    | 0     | 0  | 1 Not-determined | Genome-fragment | NA | 0     | 0     |
| S12_k141_154600                      | [full]      | 15791 | No  | NA    | 0     | 1  | Low-quality      | Genome-fragment | NA | 11.12 | 0     |
| S8-final-viral-combined_k141_275535  | [full]      | 4002  | No  | NA    | 0     | 5  | Not-determined   | Genome-fragment | NA | 0     | 0     |
| S2_k141_202014                       | [full]      | 15798 | No  | NA    | 5     | 0  | Low-quality      | Genome-fragment | NA | 40.68 | 0     |
| S8-final-viral-combined_k141_160946  | [full]      | 4412  | No  | NA    | 0     | 3  | Not-determined   | Genome-fragment | NA | 0     | 0     |
| S2-final-viral-combined_k141_83469   | [O_partial] | 15810 | Yes | 450   | 1     | 5  | Low-quality      | Genome-fragment | NA | 0.83  | 97.15 |
| S5-final-viral-combined_k141_211161  | [full]      | 15811 | No  | NA    | 12    | 0  | Low-quality      | Genome-fragment | NA | 33.53 | 0     |
| S4_k141_27636                        | [full]      | 15824 | No  | NA    | 4     | 4  | Low-quality      | Genome-fragment | NA | 47.37 | 0     |
| S8-final-viral-combined_k141_103107  | [full]      | 1691  | No  | NA    | 0     | 2  | Not-determined   | Genome-fragment | NA | 0     | 0     |
| S7-final-viral-combined_k141_21711   | [full]      | 15829 | No  | NA    | 1     | 1  | Low-quality      | Genome-fragment | NA | 11.4  | 0     |
| S7-final-viral-combined_k141_97022   | [full]      | 15829 | No  | NA    | 11    | 0  | Low-quality      | Genome-fragment | NA | 25.7  | 0     |
| S8-final-viral-combined_k141_103130  | [full]      | 1617  | No  | NA    | 0     | 0  | Not-determined   | Genome-fragment | NA | 0     | 0     |
| S3-final-viral-combined_k141_35740   | [full]      | 15835 | No  | NA    | 0     | 8  | Low-quality      | Genome-fragment | NA | 1.66  | 0     |
| S8-final-viral-combined_k141_91518   | [full]      | 1486  | No  | NA    | 0     | 1  | Not-determined   | Genome-fragment | NA | 0     | 0     |
| S8-final-viral-combined_k141_126236  | [full]      | 2157  | No  | NA    | 0     | 2  | Not-determined   | Genome-fragment | NA | 0     | 0     |
| S8-final-viral-combined_k141_161004  | [full]      | 1314  | No  | NA    | 0     | 0  | Not-determined   | Genome-fragment | NA | 0     | 0     |
| S8-final-viral-combined_k141_218183  | [full]      | 2095  | No  | NA    | 0     | 0  | Not-determined   | Genome-fragment | NA | 0     | 0     |
| S12-final-viral-combined_k141_31488  | [full]      | 15845 | No  | NA    | 7     | 0  | Low-quality      | Genome-fragment | NA | 36.99 | 0     |
| S8-final-viral-combined_k141_20999   | [full]      | 1322  | No  | NA    | 0     | 0  | Not-determined   | Genome-fragment | NA | 0     | 0     |
| S5-final-viral-combined_k141_139224  | [full]      | 15872 | No  | NA    | 1     | 7  | Low-quality      | Genome-fragment | NA | 9.82  | 0     |
| S8-final-viral-combined_k141_126278  | [full]      | 1196  | No  | NA    | 0     | 0  | Not-determined   | Genome-fragment | NA | 0     | 0     |
| S8-final-viral-combined_k141_261975  | [full]      | 1787  | No  | NA    | 0     | 1  | Not-determined   | Genome-fragment | NA | 0     | 0     |
| S8-final-viral-combined_k141_9897    | [full]      | 1311  | No  | NA    | 0     | 0  | Not-determined   | Genome-fragment | NA | 0     | 0     |
| S4-final-viral-combined_k141_105849  | [full]      | 15888 | No  | NA    | 1     | 1  | Low-quality      | Genome-fragment | NA | 9.39  | 0     |
| S8-final-viral-combined_k141_68780   | [full]      | 23585 | Yes | 51556 | 18    | 18 | High-quality     | Genome-fragment | NA | 100   | 29.84 |
| S8-final-viral-combined_k141_218237  | [full]      | 3100  | No  | NA    | 0     | 0  | Not-determined   | Genome-fragment | NA | 0     | 0     |
| S12-final-viral-combined_k141_338509 | [full]      | 15889 | No  | NA    | 1     | 0  | Low-quality      | Genome-fragment | NA | 33.52 | 0     |
| S9-final-viral-combined_k141_350144  | [full]      | 15910 | No  | NA    | 13    | 0  | Low-quality      | Genome-fragment | NA | 33.97 | 0     |
| S8-final-viral-combined_k141_9954    | [full]      | 2002  | No  | NA    | 0     | 2  | Not-determined   | Genome-fragment | NA | 0     | 0     |
| S8-final-viral-combined_k141_114361  | [full]      | 2009  | No  | NA    | 0     | 0  | Not-determined   | Genome-fragment | NA | 0     | 0     |
| S8-final-viral-combined_k141_98811   | [full]      | 3916  | No  | NA    | 0     | 1  | Not-determined   | Genome-fragment | NA | 0     | 0     |
| S12-final-viral-combined_k141_21851  | [full]      | 15910 | No  | NA    | 4     | 0  | Low-quality      | Genome-fragment | NA | 38.19 | 0     |
| S8-final-viral-combined_k141_88233   | [O_partial] | 15920 | Yes | 9376  | 3     | 4  | Low-quality      | Genome-fragment | NA | 22.54 | 41.11 |
| S8-final-viral-combined_k141_195288  | [full]      | 4701  | No  | NA    | 0     | 2  | Not-determined   | Genome-fragment | NA | 0     | 0     |
| S12_k141_50919                       | [full]      | 15916 | No  | NA    | 1     | 0  | Low-quality      | Genome-fragment | NA | 22.07 | 0     |
| S1_k141_50450                        | [full]      | 15942 | No  | NA    | 10    | 0  | Low-quality      | Genome-fragment | NA | 23.26 | 0     |
| S8-final-viral-combined_k141_126429  | [full]      | 1886  | No  | NA    | 0     | 2  | Not-determined   | Genome-fragment | NA | 0     | 0     |
| S8-final-viral-combined_k141_916588  | [full]      | 2517  | No  | NA    | 0     | 3  | Not-determined   | Genome-fragment | NA | 0     | 0     |
| S8-final-viral-combined_k141_218309  | [full]      | 1450  | No  | NA    | 0     | 1  | Not-determined   | Genome-fragment | NA | 0     | 0     |
| S2_k141_197383                       | [full]      | 15944 | No  | NA    | 3     | 2  | Low-quality      | Genome-fragment | NA | 10.69 | 0     |
| S8-final-viral-combined_k141_91700   | [full]      | 1055  | No  | NA    | 0     | 0  | Not-determined   | Genome-fragment | NA | 0     | 0     |
| S17-k141_237656                      | [full]      | 15951 | No  | NA    | 1     | 0  | Low-quality      | Genome-fragment | NA | 28.18 | 0     |
| S8-final-viral-combined_k141_91759   | [full]      | 1028  | No  | NA    | 0     | 2  | Not-determined   | Genome-fragment | NA | 0     | 0     |
| S8-final-viral-combined_k141_252880  | [full]      | 2253  | No  | NA    | 0     | 3  | Not-determined   | Genome-fragment | NA | 0     | 0     |
| S8-final-viral-combined_k141_100701  | [full]      | 1185  | No  | NA    | 0     | 1  | Not-determined   | Genome-fragment | NA | 0     | 0     |
| S8-final-viral-combined_k141_103321  | [full]      | 1819  | No  | NA    | 0     | 0  | Not-determined   | Genome-fragment | NA | 0     | 0     |
| S8-final-viral-combined_k141_252927  | [full]      | 3442  | No  | NA    | 0     | 1  | Not-determined   | Genome-fragment | NA | 0     | 0     |
| S8-final-viral-combined_k141_114460  | [full]      | 1856  | No  | NA    | 0     | 2  | Not-determined   | Genome-fragment | NA | 0     | 0     |
| S8-final-viral-combined_k141_218406  | [full]      | 2589  | No  | NA    | 0     | 2  | Not-determined   | Genome-fragment | NA | 0     | 0     |
| S2_k141_26369                        | [full]      | 15951 | No  | NA    | 4     | 0  | Low-quality      | Genome-fragment | NA | 9.1   | 0     |
| S8-final-viral-combined_k141_252977  | [full]      | 2487  | No  | NA    | 0     | 0  | Not-determined   | Genome-fragment | NA | 0     | 0     |
| S8-final-viral-combined_k141_97173   | [full]      | 3523  | No  | NA    | 0     | 2  | Not-determined   | Genome-fragment | NA | 0     | 0     |
| S8-final-viral-combined_k141_21256   | [full]      | 8652  | No  | NA    | 0     | 3  | Not-determined   | Genome-fragment | NA | 0     | 0     |
| S8-final-viral-combined_k141_26983   | [O_partial] | 15955 | Yes | 2997  | 3     | 9  | Low-quality      | Genome-fragment | NA | 9.54  | 81.22 |
| S8-final-viral-combined_k141_181181  | [full]      | 15185 | Yes | 33165 | 19    | 7  | Medium-quality   | Genome-fragment | NA | 57.63 | 35.08 |
| S17-final-viral-combined_k141_120194 | [O_partial] | 15955 | No  | NA    | 0     | 3  | Low-quality      | Genome-fragment | NA | 15.8  | 0     |
| S8-final-viral-combined_k141_103400  | [full]      | 2080  | No  | NA    | 0     | 2  | Not-determined   | Genome-fragment | NA | 0     | 0     |
| S8-final-viral-combined_k141_275884  | [full]      | 9990  | No  | NA    | 0     | 1  | Not-determined   | Genome-fragment | NA | 0     | 0     |
| S8-final-viral-combined_k141_21280   | [full]      | 1817  | No  | NA    | 0     | 2  | Not-determined   | Genome-fragment | NA | 0     | 0     |
| S8-final-viral-combined_k141_91917   | [full]      | 1925  | No  | NA    | 0     | 1  | Not-determined   | Genome-fragment | NA | 0     | 0     |
| S8-final-viral-combined_k141_126516  | [full]      | 2061  | No  | NA    | 0     | 1  | Not-determined   | Genome-fragment | NA | 0     | 0     |
| S8-final-viral-combined_k141_57207   | [full]      | 19034 | No  | NA    | 0     | 19 | Not-determined   | Genome-fragment | NA | 0     | 0     |
| S6-final-viral-combined_k141_112635  | [O_partial] | 15964 | Yes | 12035 | 6     | 3  | Low-quality      | Genome-fragment | NA | 32.95 | 24.61 |
| S5-final-viral-combined_k141_203080  | [O_partial] | 15972 | No  | NA    | 1     | 9  | Low-quality      | Genome-fragment | NA | 10.7  | 0     |
| S11-final-viral-combined_k141_199360 | [full]      | 15992 | Yes | 10966 | 0     | 4  | Low-quality      | Genome-fragment | NA | 16.72 | 31.43 |
| S8-final-viral-combined_k141_253051  | [full]      | 4856  | No  | NA    | 0     | 0  | Not-determined   | Genome-fragment | NA | 0     | 0     |
| S5-final-viral-combined_k141_178287  | [full]      | 16006 | No  | NA    | 14    | 0  | Low-quality      | Genome-fragment | NA | 42.93 | 0     |
| S4_k141_252980                       | [full]      | 16017 | No  | NA    | 10    | 1  | Low-quality      | Genome-fragment | NA | 29.25 | 0     |
| S12-final-viral-combined_k141_313233 | [full]      | 16058 | No  | NA    | 3     | 1  | Low-quality      | Genome-fragment | NA | 31.3  | 0     |
| S8-final-viral-combined_k141_21376   | [full]      | 1696  | No  | NA    | 0     | 0  | Not-determined   | Genome-fragment | NA | 0     | 0     |
| S11-final-viral-combined_k141_26096  | [O_partial] | 16063 | No  | NA    | 0     | 2  | Low-quality      | Genome-fragment | NA | 19.21 | 0     |
| S8-final-viral-combined_k141_103563  | [full]      | 1552  | No  | NA    | 0     | 1  | Not-determined   | Genome-fragment | NA | 0     | 0     |
| S8-final-viral-combined_k141_57346   | [full]      | 1361  | No  | NA    | 0     | 1  | Not-determined   | Genome-fragment | NA | 0     | 0     |
| S11-final-viral-combined_k141_295568 | [O_partial] | 16069 | Yes | 9968  | 3     | 2  | Low-quality      | Genome-fragment | NA | 6.13  | 37.97 |
| S9-final-viral-combined_k141_118443  | [full]      | 16073 | No  | NA    | 0     | 1  | Low-quality      | Genome-fragment | NA | 17.02 | 0     |
| S8_k141_148039                       | [full]      | 16075 | No  | NA    | 0     | 11 | Low-quality      | Genome-fragment | NA | 29.29 | 0     |
| S12_k141_57989                       | [full]      | 16133 | No  | NA    | 9     | 0  | Low-quality      | Genome-fragment | NA | 34.47 | 0     |
| S2-final-viral-combined_k141_65444   | [full]      | 16137 | No  | NA    | 1     | 1  | Low-quality      | Genome-fragment | NA | 4.84  | 0     |
| S8-final-viral-combined_k141_92007   | [full]      | 4611  | No  | NA    | 0     | 5  | Not-determined   | Genome-fragment | NA | 0     | 0     |
| S8-final-viral-combined_k141_256295  | [O_partial] | 16145 | No  | NA    | 0     | 2  | Low-quality      | Genome-fragment | NA | 48.42 | 0     |
| S12-final-viral-combined_k141_52961  | [full]      | 16162 | No  | NA    | 10858 | 2  | Low-quality      | Genome-fragment | NA | 6.97  | 32.78 |
| S8-final-viral-combined_k141_262405  | [full]      | 3812  | No  | NA    | 0     | 1  | Not-determined   | Genome-fragment | NA | 0     | 0     |
| S4-final-viral-combined_k141_39193   | [full]      | 16179 | No  | NA    | 9     | 0  | Low-quality      | Genome-fragment | NA | 33.14 | 0     |
| S8-final-viral-combined_k141_195093  | [full]      | 1216  | No  | NA    | 0     | 1  | Not-determined   | Genome-fragment | NA | 0     | 0     |
| S8_k141_156178                       | [full]      | 6262  | No  | NA    | 0     | 1  | Low-quality      | Genome-fragment | NA | 16.15 | 0     |
| S8-final-viral-combined_k141_195702  | [full]      | 6283  | No  | NA    | 0     | 4  | Not-determined   | Genome-fragment | NA | 0     | 0     |
| S11-final-viral-combined_k141_244799 | [full]      | 16200 | Yes | 13886 | 6     | 2  | Low-quality      | Genome-fragment | NA | 35.84 | 14.28 |
| S8-final-viral-combined_k141_103201  | [full]      | 1166  | No  | NA    | 0     | 0  | Not-determined   | Genome-fragment | NA | 0     | 0     |
| S9-final-viral-combined_k141_24172   | [O_partial] | 16220 | Yes | 14846 | 3     | 1  | Low-quality      | Genome-fragment | NA | 30.26 | 8.47  |
| S5-final-viral-combined_k141_90785   | [full]      | 16221 | Yes | 10355 | 2     | 3  | Low-quality      | Genome-fragment | NA | 32.71 | 36.16 |
| S2-final-viral-combined_k141_128045  | [full]      | 16240 | Yes | 8601  | 3     | 0  | Low-quality      | Genome-fragment | NA | 10.82 | 47.04 |
| S8-final-viral-combined_k141_206195  | [full]      | 2483  | No  | NA    | 0     | 0  | Not-determined   | Genome-fragment | NA | 0     | 0     |
| S11-final-viral-combined_k141_252402 | [full]      | 16259 | No  | NA    | 4     | 1  | Low-quality      | Genome-fragment | NA | 36.46 | 0     |
| S8-final-viral-combined_k141_114714  | [full]      | 4476  | No  | NA    | 0     | 1  | Not-determined   | Genome-fragment | NA | 0     | 0     |
| S8-final-viral-combined_k141_216201  | [full]      | 2315  | No  | NA    | 0     | 1  | Not-determined   | Genome-fragment | NA | 0     | 0     |
| S8-final-viral-combined_k141_21621   | [full]      | 2004  | No  | NA    | 0     | 1  | Not-determined   | Genome-fragment | NA | 0     | 0     |
| S8-final-viral-combined_k141_21624   | [full]      | 1276  | No  | NA    | 0     | 0  | Not-determined   | Genome-fragment | NA | 0     | 0     |
| S8-final-viral-combined_k141_2103191 | [full]      | 2470  | No  | NA    | 0     | 2  | Not-determined   | Genome-fragment | NA | 0     | 0     |
| S8-final-viral-combined_k141_175558  | [full]      | 5948  | No  | NA    | 0     | 2  | Not-determined   | Genome-fragment | NA | 0     | 0     |
| S5-final-viral-combined_k141_202237  | [O_partial] | 16266 | No  | NA    | 0     | 5  | Low-quality      | Genome-fragment | NA | 23.41 | 0     |
| S8-final-viral-combined_k141_161880  | [full]      | 16277 | No  | NA    | 0     | 0  | Low-quality      | Genome-fragment | NA | 22.76 | 0     |
| S12-final-viral-combined_k141_18256  | [full]      | 16284 | No  | NA    | 1     | 2  | Low-quality      | Genome-fragment | NA | 9.95  | 0     |
| S8-final-viral-combined_k141_114780  | [full]      | 2141  | No  | NA    | 0     | 0  | Not-determined   | Genome-fragment | NA | 0     | 0     |
| S8-final-viral-combined_k141_92148   | [full]      | 1919  | No  | NA    | 0     | 1  | Not-determined   | Genome-fragment | NA | 0     | 0     |
| S8-final-viral-combined_k141_21798   | [full]      | 1345  | No  | NA    | 0     | 1  | Not-determined   | Genome-fragment | NA | 0     | 0     |
| S11-final-viral-combined_k141_389133 | [full]      | 16294 | No  | NA    | 1     | 0  | Low-quality      | Genome-fragment | NA | 14.67 | 0     |
| S2-final-viral-combined_k141_103941  | [full]      | 16300 | No  | NA    | 5     | 0  | Low-quality      | Genome-fragment | NA | 16.48 | 0     |
| S8-final-viral-combined_k141_194197  | [O_partial] | 16310 | No  | NA    | 0     | 1  | Low-quality      | Genome-fragment | NA | 32.48 | 0     |
| S8-final-viral-combined_k141_260338  | [full]      | 2645  | No  | NA    | 0     | 1  | Not-determined   | Genome-fragment | NA | 0     | 0     |
| S12-final-viral-combined_k141_301117 | [full]      | 16346 | No  | NA    | 1     | 7  | Low-quality      | Genome-fragment | NA | 20.11 | 0     |
| S12_k141_191626                      | [full]      | 16363 | No  | NA    | 4     | 0  | Low-quality      | Genome-fragment | NA | 20.34 | 0     |
| S12-final-viral-combined_k141_84980  | [full]      | 16409 | No  | NA    | 4     | 0  | Low-quality      | Genome-fragment | NA | 14.99 | 0     |
| S8-final-viral-combined_k141_107541  | [full]      | 2586  | No  | NA    | 0     | 1  | Not-determined   | Genome-fragment | NA | 0     | 0     |
| S1-final-viral-combined_k141_222891  | [full]      | 16415 | No  | NA    | 0     | 16 | Low-quality      | Genome-fragment | NA | 8.55  | 0     |
| S8-final-viral-combined_k141_262818  | [full]      | 2608  | No  | NA    | 0     | 1  | Not-determined   | Genome-fragment | NA | 0     | 0     |
| S8-final-viral-combined_k141_21875   | [full]      | 2097  | No  | NA    | 0     | 1  | Not-determined   | Genome-fragment | NA | 0     | 0     |



|                                      |             |       |     |       |    |    |                |                 |       |       |
|--------------------------------------|-------------|-------|-----|-------|----|----|----------------|-----------------|-------|-------|
| S8-final-viral-combined_k141_264711  | [full]      | 3537  | No  | NA    | 1  | 1  | Medium-quality | Genome-fragment | 85    | 0     |
| S12-final-viral-combined_k141_338151 | [0_partial] | 16684 | No  | NA    | 1  | 4  | Low-quality    | Genome-fragment | 40.08 | 0     |
| S8-final-viral-combined_k141_264865  | [full]      | 3653  | No  | NA    | 0  | 4  | Not-determined | Genome-fragment | NA    | 0     |
| S3-final-viral-combined_k141_14046   | [full]      | 16697 | No  | NA    | 0  | 11 | Low-quality    | Genome-fragment | 13.5  | 0     |
| S17-final-viral-combined_k141_100459 | [full]      | 16700 | No  | NA    | 2  | 1  | Low-quality    | Genome-fragment | 38.99 | 0     |
| S12-final-viral-combined_k141_737391 | [full]      | 16704 | Yes | 8692  | 2  | 5  | Low-quality    | Genome-fragment | 19.88 | 47.86 |
| S5-final-viral-combined_k141_202147  | [0_partial] | 16705 | No  | NA    | 1  | 1  | Low-quality    | Genome-fragment | 12.8  | 0     |
| S12-final-viral-combined_k141_256799 | [full]      | 16714 | No  | NA    | 5  | 0  | Low-quality    | Genome-fragment | 46.3  | 0     |
| S2_k141_195451                       | [full]      | 16741 | No  | NA    | 9  | 1  | Low-quality    | Genome-fragment | 11.36 | 0     |
| S8-final-viral-combined_k141_219482  | [0_partial] | 12441 | No  | NA    | 0  | 9  | Not-determined | Genome-fragment | NA    | 0     |
| S12-final-viral-combined_k141_294260 | [0_partial] | 16798 | Yes | 9342  | 2  | 4  | Low-quality    | Genome-fragment | 13.2  | 44.39 |
| S8-final-viral-combined_k141_151103  | [full]      | 16820 | No  | NA    | 0  | 1  | Low-quality    | Genome-fragment | 6.71  | 0     |
| S12-final-viral-combined_k141_236407 | [0_partial] | 16821 | No  | NA    | 1  | 6  | Low-quality    | Genome-fragment | 38.2  | 0     |
| S8-final-viral-combined_k141_12543   | [0_partial] | 14505 | No  | NA    | 0  | 6  | Not-determined | Genome-fragment | NA    | 0     |
| S7-final-viral-combined_k141_157284  | [full]      | 16824 | No  | NA    | 6  | 0  | Low-quality    | Genome-fragment | 31.19 | 0     |
| S5-final-viral-combined_k141_120070  | [0_partial] | 16841 | Yes | 12873 | 7  | 1  | Low-quality    | Genome-fragment | 53.89 | 23.56 |
| S8-final-viral-combined_k141_105853  | [0_partial] | 11265 | No  | NA    | 7  | 4  | Not-determined | Genome-fragment | NA    | 0     |
| S17-final-viral-combined_k141_91575  | [full]      | 16850 | No  | NA    | 14 | 0  | Low-quality    | Genome-fragment | 48.85 | 0     |
| S9-final-viral-combined_k141_100775  | [full]      | 16868 | Yes | 10227 | 3  | 2  | Low-quality    | Genome-fragment | 21.97 | 38.78 |
| S17-final-viral-combined_k141_162054 | [0_partial] | 16882 | Yes | 4489  | 2  | 10 | Low-quality    | Genome-fragment | 6.74  | 73.41 |
| S1-final-viral-combined_k141_73122   | [full]      | 16892 | No  | NA    | 0  | 8  | Low-quality    | Genome-fragment | 19.39 | 0     |
| S11-final-viral-combined_k141_318551 | [full]      | 16916 | No  | NA    | 12 | 0  | Low-quality    | Genome-fragment | 49.79 | 0     |
| S7-final-viral-combined_k141_22291   | [0_partial] | 16941 | No  | NA    | 5  | 1  | Low-quality    | Genome-fragment | 23.02 | 0     |
| S8-final-viral-combined_k141_220187  | [0_partial] | 16956 | No  | NA    | 2  | 6  | Low-quality    | Genome-fragment | 38.55 | 0     |
| S6_k141_134328                       | [full]      | 16994 | Yes | 13661 | 10 | 2  | Low-quality    | Genome-fragment | 22.67 | 19.61 |
| S8-final-viral-combined_k141_246185  | [0_partial] | 43201 | Yes | 33887 | 6  | 7  | High-quality   | High-quality    | 93.99 | 16.93 |
| S9-final-viral-combined_k141_72213   | [0_partial] | 17007 | No  | NA    | 6  | 9  | Low-quality    | Genome-fragment | 1.58  | 0     |
| S2-final-viral-combined_k141_188796  | [0_partial] | 17020 | No  | NA    | 5  | 1  | Low-quality    | Genome-fragment | 21.1  | 0     |
| S11-final-viral-combined_k141_241786 | [0_partial] | 17044 | No  | NA    | 1  | 2  | Low-quality    | Genome-fragment | 7.32  | 0     |
| S7-final-viral-combined_k141_128401  | [full]      | 17064 | No  | NA    | 1  | 6  | Low-quality    | Genome-fragment | 19.15 | 0     |
| S7-final-viral-combined_k141_19281   | [full]      | 17075 | No  | NA    | 15 | 0  | Low-quality    | Genome-fragment | 48.77 | 0     |
| S12-final-viral-combined_k141_155021 | [0_partial] | 17078 | No  | NA    | 1  | 1  | Low-quality    | Genome-fragment | 7.18  | 0     |
| S2-final-viral-combined_k141_156287  | [full]      | 17085 | No  | NA    | 5  | 0  | Low-quality    | Genome-fragment | 30.55 | 0     |
| S7-final-viral-combined_k141_102796  | [full]      | 17093 | No  | NA    | 0  | 2  | Low-quality    | Genome-fragment | 24.11 | 0     |
| S17-final-viral-combined_k141_22549  | [full]      | 17107 | No  | NA    | 8  | 1  | Low-quality    | Genome-fragment | 46.48 | 0     |
| S8-final-viral-combined_k141_78097   | [0_partial] | 17129 | No  | NA    | 13 | 0  | Not-determined | Genome-fragment | NA    | 0     |
| S1-final-viral-combined_k141_219519  | [full]      | 17112 | No  | NA    | 1  | 1  | Low-quality    | Genome-fragment | 12.25 | 0     |
| S6_k141_119537                       | [full]      | 17118 | No  | NA    | 7  | 0  | Low-quality    | Genome-fragment | 38.72 | 0     |
| S8_k141_31107                        | [full]      | 17124 | No  | NA    | 0  | 0  | Low-quality    | Genome-fragment | 12.4  | 0     |
| S7-final-viral-combined_k141_243145  | [0_partial] | 17158 | No  | NA    | 1  | 2  | Low-quality    | Genome-fragment | 35.17 | 0     |
| S8-final-viral-combined_k141_228797  | [full]      | 10539 | No  | NA    | 0  | 10 | Not-determined | Genome-fragment | NA    | 0     |
| S8-final-viral-combined_k141_20225   | [0_partial] | 10078 | No  | NA    | 0  | 2  | Not-determined | Genome-fragment | NA    | 0     |
| S8-final-viral-combined_k141_229038  | [0_partial] | 10968 | No  | NA    | 0  | 7  | Not-determined | Genome-fragment | NA    | 0     |
| S6-final-viral-combined_k141_602     | [full]      | 17202 | Yes | 12367 | 4  | 6  | Low-quality    | Genome-fragment | 18.36 | 28.11 |
| S8-final-viral-combined_k141_92109   | [0_partial] | 10825 | No  | NA    | 0  | 0  | Not-determined | Genome-fragment | NA    | 0     |
| S2-final-viral-combined_k141_12655   | [full]      | 17214 | No  | NA    | 5  | 0  | Low-quality    | Genome-fragment | NA    | 44.46 |
| S8-final-viral-combined_k141_126965  | [H2gene]    | 1099  | No  | NA    | 0  | 1  | Not-determined | Genome-fragment | NA    | 0     |
| S8-final-viral-combined_k141_88408   | [full]      | 17225 | No  | NA    | 11 | 1  | Low-quality    | Genome-fragment | 22.76 | 0     |
| S8-final-viral-combined_k141_131521  | [full]      | 17231 | No  | NA    | 5  | 0  | Low-quality    | Genome-fragment | 37.61 | 0     |
| S11-final-viral-combined_k141_174593 | [0_partial] | 17235 | Yes | 8109  | 2  | 4  | Low-quality    | Genome-fragment | 5.11  | 52.95 |
| S8-final-viral-combined_k141_173251  | [H2gene]    | 3150  | No  | NA    | 0  | 0  | Not-determined | Genome-fragment | NA    | 0     |
| S8-final-viral-combined_k141_220747  | [full]      | 17226 | No  | NA    | 14 | 0  | Low-quality    | Genome-fragment | 36.74 | 0     |
| S8_k141_149733                       | [full]      | 17241 | No  | NA    | 9  | 0  | Low-quality    | Genome-fragment | 31.12 | 0     |
| S8-final-viral-combined_k141_34765   | [H2gene]    | 2238  | No  | NA    | 0  | 0  | Not-determined | Genome-fragment | NA    | 0     |
| S7-final-viral-combined_k141_207936  | [full]      | 17245 | No  | NA    | 7  | 0  | Low-quality    | Genome-fragment | 29.44 | 0     |
| S8-final-viral-combined_k141_184807  | [H2gene]    | 1157  | No  | NA    | 0  | 0  | Not-determined | Genome-fragment | NA    | 0     |
| S7-final-viral-combined_k141_199567  | [full]      | 17266 | No  | NA    | 0  | 1  | Low-quality    | Genome-fragment | 38.39 | 0     |
| S8-final-viral-combined_k141_46792   | [H2gene]    | 1188  | No  | NA    | 0  | 0  | Not-determined | Genome-fragment | NA    | 0     |
| S1-final-viral-combined_k141_295021  | [full]      | 17283 | No  | NA    | 4  | 0  | Low-quality    | Genome-fragment | 49.15 | 0     |
| S8-final-viral-combined_k141_231186  | [H2gene]    | 1285  | No  | NA    | 0  | 0  | Not-determined | Genome-fragment | NA    | 0     |
| S8-final-viral-combined_k141_242853  | [H2gene]    | 1520  | No  | NA    | 0  | 0  | Not-determined | Genome-fragment | NA    | 0     |
| S8-final-viral-combined_k141_139398  | [H2gene]    | 2158  | No  | NA    | 0  | 0  | Not-determined | Genome-fragment | NA    | 0     |
| S5_k141_155507                       | [full]      | 17291 | No  | NA    | 11 | 0  | Low-quality    | Genome-fragment | 43.8  | 0     |
| S4_k141_48184                        | [full]      | 17303 | No  | NA    | 0  | 7  | Low-quality    | Genome-fragment | 5.25  | 0     |
| S8-final-viral-combined_k141_24056   | [H2gene]    | 1615  | No  | NA    | 0  | 0  | Not-determined | Genome-fragment | NA    | 0     |
| S11-final-viral-combined_k141_319509 | [0_partial] | 17304 | Yes | 11832 | 3  | 0  | Low-quality    | Genome-fragment | 22.52 | 31.62 |
| S17-final-viral-combined_k141_44707  | [full]      | 17341 | No  | NA    | 3  | 0  | Low-quality    | Genome-fragment | 21.06 | 0     |
| S9-final-viral-combined_k141_88641   | [full]      | 17345 | No  | NA    | 5  | 0  | Low-quality    | Genome-fragment | 44.09 | 0     |
| S8-final-viral-combined_k141_197085  | [H2gene]    | 1081  | No  | NA    | 0  | 0  | Not-determined | Genome-fragment | NA    | 0     |
| S17-final-viral-combined_k141_128756 | [0_partial] | 17345 | No  | NA    | 1  | 13 | Low-quality    | Genome-fragment | 9.57  | 0     |
| S17-final-viral-combined_k141_224065 | [full]      | 17361 | No  | NA    | 3  | 0  | Low-quality    | Genome-fragment | 21.09 | 0     |
| S2-final-viral-combined_k141_231101  | [full]      | 17373 | No  | NA    | 0  | 0  | Low-quality    | Genome-fragment | 46.97 | 0     |
| S8-final-viral-combined_k141_162894  | [H2gene]    | 2211  | No  | NA    | 0  | 0  | Not-determined | Genome-fragment | NA    | 0     |
| S8-final-viral-combined_k141_204483  | [full]      | 17375 | No  | NA    | 2  | 1  | Low-quality    | Genome-fragment | 32.04 | 0     |
| S5-final-viral-combined_k141_197371  | [full]      | 17393 | No  | NA    | 0  | 0  | Low-quality    | Genome-fragment | 31.08 | 0     |
| S5-final-viral-combined_k141_41485   | [0_partial] | 17393 | No  | NA    | 2  | 5  | Low-quality    | Genome-fragment | 28.39 | 0     |
| S8-final-viral-combined_k141_105601  | [H2gene]    | 1159  | No  | NA    | 0  | 1  | Not-determined | Genome-fragment | NA    | 0     |
| S5-final-viral-combined_k141_48525   | [0_partial] | 17395 | No  | NA    | 2  | 9  | Low-quality    | Genome-fragment | 9.71  | 0     |
| S7_k141_17917                        | [full]      | 17414 | No  | NA    | 6  | 1  | Low-quality    | Genome-fragment | 33.1  | 0     |
| S8-final-viral-combined_k141_36373   | [H2gene]    | 1059  | No  | NA    | 0  | 0  | Not-determined | Genome-fragment | NA    | 0     |
| S7-final-viral-combined_k141_212403  | [0_partial] | 17447 | No  | NA    | 1  | 1  | Low-quality    | Genome-fragment | 38.04 | 0     |
| S8-final-viral-combined_k141_189481  | [full]      | 17454 | No  | NA    | 1  | 0  | Low-quality    | Genome-fragment | 43    | 0     |
| S1-final-viral-combined_k141_114540  | [full]      | 17481 | No  | NA    | 0  | 11 | Low-quality    | Genome-fragment | 4.82  | 0     |
| S8-final-viral-combined_k141_158562  | [full]      | 17489 | No  | NA    | 2  | 1  | Low-quality    | Genome-fragment | 40.55 | 0     |
| S17-final-viral-combined_k141_31713  | [full]      | 17518 | Yes | 14875 | 4  | 0  | Low-quality    | Genome-fragment | 16.93 | 15.09 |
| S8-final-viral-combined_k141_198260  | [H2gene]    | 1176  | No  | NA    | 0  | 0  | Not-determined | Genome-fragment | NA    | 0     |
| S12-final-viral-combined_k141_348927 | [full]      | 17531 | No  | NA    | 16 | 0  | Low-quality    | Genome-fragment | 22.44 | 0     |
| S7-final-viral-combined_k141_28721   | [full]      | 17564 | Yes | 10648 | 9  | 7  | Low-quality    | Genome-fragment | 3.79  | 39.38 |
| S1-final-viral-combined_k141_365377  | [full]      | 17586 | No  | NA    | 0  | 0  | Low-quality    | Genome-fragment | 18.15 | 0     |
| S7-final-viral-combined_k141_185773  | [full]      | 17589 | No  | NA    | 14 | 1  | Low-quality    | Genome-fragment | 42.51 | 0     |
| S8-final-viral-combined_k141_118022  | [H2gene]    | 1415  | No  | NA    | 0  | 0  | Not-determined | Genome-fragment | NA    | 0     |
| S2-final-viral-combined_k141_72911   | [full]      | 17596 | No  | NA    | 11 | 0  | Low-quality    | Genome-fragment | 36.18 | 0     |
| S11-final-viral-combined_k141_266464 | [full]      | 17598 | No  | NA    | 10 | 0  | Low-quality    | Genome-fragment | 48.49 | 0     |
| S8-final-viral-combined_k141_60946   | [H2gene]    | 1118  | No  | NA    | 0  | 0  | Not-determined | Genome-fragment | NA    | 0     |
| S8-final-viral-combined_k141_136959  | [0_partial] | 17613 | Yes | 11556 | 3  | 1  | Low-quality    | Genome-fragment | 13.32 | 34.39 |
| S11-final-viral-combined_k141_53705  | [full]      | 17616 | No  | NA    | 2  | 1  | Low-quality    | Genome-fragment | 39.97 | 0     |
| S12-final-viral-combined_k141_156069 | [full]      | 17623 | No  | NA    | 8  | 0  | Low-quality    | Genome-fragment | 27.57 | 0     |
| S9-final-viral-combined_k141_48407   | [full]      | 17648 | No  | NA    | 14 | 0  | Low-quality    | Genome-fragment | 38.43 | 0     |
| S12_k141_23928                       | [full]      | 17660 | No  | NA    | 1  | 1  | Low-quality    | Genome-fragment | 27.41 | 0     |
| S8-final-viral-combined_k141_14871   | [full]      | 17681 | No  | NA    | 0  | 3  | Low-quality    | Genome-fragment | 18.15 | 0     |
| S8-final-viral-combined_k141_130531  | [H2gene]    | 1761  | No  | NA    | 0  | 0  | Not-determined | Genome-fragment | NA    | 0     |
| S8-final-viral-combined_k141_49421   | [H2gene]    | 1474  | No  | NA    | 0  | 0  | Not-determined | Genome-fragment | NA    | 0     |
| S8-final-viral-combined_k141_1463    | [H2gene]    | 1468  | No  | NA    | 0  | 0  | Not-determined | Genome-fragment | NA    | 0     |
| S8-final-viral-combined_k141_83841   | [H2gene]    | 1275  | No  | NA    | 0  | 0  | Not-determined | Genome-fragment | NA    | 0     |
| S8-final-viral-combined_k141_130966  | [H2gene]    | 1218  | No  | NA    | 0  | 0  | Not-determined | Genome-fragment | NA    | 0     |
| S1-final-viral-combined_k141_205178  | [full]      | 17687 | No  | NA    | 17 | 1  | Low-quality    | Genome-fragment | 38    | 0     |
| S8-final-viral-combined_k141_14803   | [H2gene]    | 1281  | No  | NA    | 0  | 0  | Not-determined | Genome-fragment | NA    | 0     |
| S2-final-viral-combined_k141_13212   | [full]      | 17697 | No  | NA    | 1  | 3  | Low-quality    | Genome-fragment | 19.82 | 0     |
| S7-final-viral-combined_k141_150174  | [full]      | 17704 | No  | NA    | 0  | 0  | Low-quality    | Genome-fragment | 12.75 | 0     |
| S8-final-viral-combined_k141_62253   | [H2gene]    | 1603  | No  | NA    | 0  | 0  | Not-determined | Genome-fragment | NA    | 0     |
| S12_k141_326806                      | [full]      | 17720 | No  | NA    | 1  | 3  | Low-quality    | Genome-fragment | 29.75 | 0     |
| S8-final-viral-combined_k141_27797   | [H2gene]    | 2313  | No  | NA    | 0  | 0  | Not-determined | Genome-fragment | NA    | 0     |
| S8-final-viral-combined_k141_154500  | [H2gene]    | 1106  | No  | NA    | 0  | 0  | Not-determined | Genome-fragment | NA    | 0     |
| S7-final-viral-combined_k141_74742   | [full]      | 17723 | No  | NA    | 6  | 0  | Low-quality    | Genome-fragment | 25.67 | 0     |
| S8-final-viral-combined_k141_15236   | [H2gene]    | 1029  | No  | NA    | 0  | 0  | Not-determined | Genome-fragment | NA    | 0     |
| S2_k141_138761                       | [full]      | 17746 | No  | NA    | 17 | 0  | Low-quality    | Genome-fragment | 42.37 | 0     |
| S11-final-viral-combined_k141_123561 | [full]      | 17751 | Yes | 9532  | 3  | 9  | Low-quality    | Genome-fragment | 18.14 | 46.3  |
| S17-final-viral-combined_k141_241882 | [full]      | 17771 | No  | NA    | 0  | 3  | Low-quality    | Genome-fragment | 23.58 | 0     |
| S1-final-viral-combined_k141_22522   | [full]      | 17827 | No  | NA    | 0  | 0  | Low-quality    | Genome-fragment | 48.74 | 0     |
| S1_k141_216462                       | [full]      | 17865 | No  | NA    | 10 | 0  | Low-quality    | Genome-fragment | 27.82 | 0     |
| S17-final-viral-combined_k141_202345 | [full]      | 17876 | No  | NA    | 0  | 4  | Low-quality    | Genome-fragment | 23.16 | 0     |
| S8-final-viral-combined_k141_161055  | [H2gene]    | 1543  | No  | NA    | 0  | 0  | Not-determined | Genome-fragment | NA    | 0     |
| S7-final-viral-combined_k141_134974  | [1_partial] | 17880 | No  | NA    | 1  | 2  | Low-quality    | Genome-fragment | 7.52  | 0     |
| S2_k141_162889                       | [full]      | 17885 | No  | NA    | 5  | 1  | Low-quality    | Genome-fragment | 22.81 | 0     |
| S5-final-viral-combined_k141_104394  | [0_partial] | 17901 | Yes | 7175  | 2  | 1  | Low-quality    | Genome-fragment | 5.11  | 59.92 |
| S2-final-viral-combined_k14          |             |       |     |       |    |    |                |                 |       |       |



|                                                |       |     |    |       |               |                 |                 |       |       |
|------------------------------------------------|-------|-----|----|-------|---------------|-----------------|-----------------|-------|-------|
| S2-final-viral-combined_k141_142224[0_partial  | 18419 | No  | NA | 1     | 2             | Low-quality     | Genome-fragment | 7.75  | 0     |
| S8-final-viral-combined_k141_216484[1]2zgene   | 1069  | No  | NA | 0     | 1             | Not-determined  | Genome-fragment | NA    | 0     |
| S8-final-viral-combined_k141_8450[1]2zgene     | 1667  | No  | NA | 0     | 1             | Not-determined  | Genome-fragment | NA    | 0     |
| S2-final-viral-combined_k141_103506[0_partial  | 18463 | Yes | NA | 10130 | 2             | 6 Low-quality   | Genome-fragment | 4.54  | 45.13 |
| S17-final-viral-combined_k141_79391[full       | 18503 | No  | NA | 12    | 0             | Low-quality     | Genome-fragment | 49.74 | 0     |
| S4_k141_104468                                 | 18507 | No  | NA | 0     | 0             | Low-quality     | Genome-fragment | 24.32 | 0     |
| S12-final-viral-combined_k141_295365[1]        | 18510 | No  | NA | 1     | 0             | Low-quality     | Genome-fragment | 11.73 | 0     |
| S12-final-viral-combined_k141_98930[0_partial  | 18517 | Yes | NA | 4031  | 2             | 12 Low-quality  | Genome-fragment | 6.61  | 78.23 |
| S8-final-viral-combined_k141_175582[full       | 18517 | No  | NA | 12    | 1             | Low-quality     | Genome-fragment | 47.79 | 0     |
| S7_k141_235684                                 | 18545 | No  | NA | 0     | 2             | Low-quality     | Genome-fragment | 19.48 | 0     |
| S5-final-viral-combined_k141_38656[full        | 18578 | No  | NA | 0     | 8             | Low-quality     | Genome-fragment | 7.19  | 0     |
| S17-final-viral-combined_k141_83747[1]2zgene   | 18612 | No  | NA | 0     | 4 Low-quality | Genome-fragment | 24.32           | 0     |       |
| S8-final-viral-combined_k141_8801[1]2zgene     | 1572  | No  | NA | 0     | 0             | Not-determined  | Genome-fragment | NA    | 0     |
| S11-final-viral-combined_k141_110117[full      | 18620 | No  | NA | 4     | 1             | Low-quality     | Genome-fragment | 24.08 | 0     |
| S5-final-viral-combined_k141_109382[full       | 18625 | No  | NA | 10    | 1             | Low-quality     | Genome-fragment | 45.31 | 0     |
| S11-final-viral-combined_k141_49444[full       | 18660 | No  | NA | 5     | 1             | Low-quality     | Genome-fragment | 44.49 | 0     |
| S8-final-viral-combined_k141_149129[1]2zgene   | 1986  | No  | NA | 0     | 0             | Not-determined  | Genome-fragment | NA    | 0     |
| S1-final-viral-combined_k141_73202[full        | 18660 | No  | NA | 12    | 0             | Low-quality     | Genome-fragment | 30.89 | 0     |
| S8-final-viral-combined_k141_204550[1]2zgene   | 2052  | No  | NA | 0     | 0             | Not-determined  | Genome-fragment | NA    | 0     |
| S8-final-viral-combined_k141_9149[1]2zgene     | 2013  | No  | NA | 0     | 0             | Not-determined  | Genome-fragment | NA    | 0     |
| S3-final-viral-combined_k141_7588[0_partial    | 18664 | Yes | NA | 13984 | 3             | 4 Low-quality   | Genome-fragment | 33.62 | 25.08 |
| S5-final-viral-combined_k141_216484[1]2zgene   | 18667 | No  | NA | 12    | 0             | Low-quality     | Genome-fragment | 23.61 | 0     |
| S5-final-viral-combined_k141_7742[0_partial    | 18676 | No  | NA | 0     | 3             | Low-quality     | Genome-fragment | 18.5  | 0     |
| S8-final-viral-combined_k141_172192[1]2zgene   | 1078  | No  | NA | 0     | 1             | Not-determined  | Genome-fragment | NA    | 0     |
| S8-final-viral-combined_k141_217951[1]2zgene   | 1039  | No  | NA | 0     | 0             | Not-determined  | Genome-fragment | NA    | 0     |
| S1_k141_104373                                 | 18717 | No  | NA | 6     | 0             | Low-quality     | Genome-fragment | 41.69 | 0     |
| S5-final-viral-combined_k141_163801[0_partial  | 18730 | Yes | NA | 5608  | 2             | 3 Low-quality   | Genome-fragment | 2.98  | 70.06 |
| S8-final-viral-combined_k141_205925[1]2zgene   | 1551  | No  | NA | 0     | 0             | Not-determined  | Genome-fragment | NA    | 0     |
| S8-final-viral-combined_k141_232161[1]2zgene   | 1019  | No  | NA | 0     | 1             | Not-determined  | Genome-fragment | NA    | 0     |
| S12-final-viral-combined_k141_337033[full      | 18746 | Yes | NA | 13017 | 6             | 3 Low-quality   | Genome-fragment | 16.43 | 30.56 |
| S8_k141_245079                                 | 18784 | No  | NA | 1     | 7             | Low-quality     | Genome-fragment | 11.5  | 0     |
| S5-final-viral-combined_k141_208807[full       | 18788 | No  | NA | 1     | 0             | Low-quality     | Genome-fragment | 12.63 | 0     |
| S8_k141_92163                                  | 5700  | No  | NA | 0     | 0             | Not-determined  | Genome-fragment | NA    | 0     |
| S8_k141_138257                                 | 2755  | No  | NA | 0     | 2             | Not-determined  | Genome-fragment | NA    | 0     |
| S5-final-viral-combined_k141_189786[0_partial  | 18800 | Yes | NA | 8259  | 2             | 5 Low-quality   | Genome-fragment | 5.36  | 56.07 |
| S8_k141_253477                                 | 4078  | No  | NA | 0     | 4             | Not-determined  | Genome-fragment | NA    | 0     |
| S8_k141_46109                                  | 1044  | No  | NA | 0     | 1             | Not-determined  | Genome-fragment | NA    | 0     |
| S8_k141_138303                                 | 1074  | No  | NA | 0     | 1             | Not-determined  | Genome-fragment | NA    | 0     |
| S8_k141_218920                                 | 1641  | No  | NA | 0     | 0             | Not-determined  | Genome-fragment | NA    | 0     |
| S1_k141_19414                                  | 18813 | No  | NA | 1     | 0             | Low-quality     | Genome-fragment | 27.97 | 0     |
| S8_k141_80650                                  | 1294  | No  | NA | 0     | 2             | Not-determined  | Genome-fragment | NA    | 0     |
| S8_k141_255005                                 | 1016  | No  | NA | 0     | 0             | Not-determined  | Genome-fragment | NA    | 0     |
| S8_k141_11557                                  | 1765  | No  | NA | 0     | 2             | Not-determined  | Genome-fragment | NA    | 0     |
| S8_k141_138377                                 | 2302  | No  | NA | 0     | 2             | Not-determined  | Genome-fragment | NA    | 0     |
| S8_k141_195915                                 | 3266  | No  | NA | 0     | 2             | Not-determined  | Genome-fragment | NA    | 0     |
| S8_k141_195923                                 | 1095  | No  | NA | 0     | 1             | Not-determined  | Genome-fragment | NA    | 0     |
| S4_k141_32115                                  | 18819 | No  | NA | 6     | 0             | Low-quality     | Genome-fragment | 29.04 | 0     |
| S8_k141_80720                                  | 2032  | No  | NA | 0     | 1             | Not-determined  | Genome-fragment | NA    | 0     |
| S12_k141_74112                                 | 18828 | No  | NA | 1     | 1             | Low-quality     | Genome-fragment | 10.21 | 0     |
| S8_k141_230590                                 | 5350  | No  | NA | 0     | 2             | Not-determined  | Genome-fragment | NA    | 0     |
| S8_k141_253509                                 | 1428  | No  | NA | 0     | 0             | Not-determined  | Genome-fragment | NA    | 0     |
| S8_k141_46243                                  | 1019  | No  | NA | 0     | 1             | Not-determined  | Genome-fragment | NA    | 0     |
| S8_k141_184434                                 | 1854  | No  | NA | 0     | 1             | Not-determined  | Genome-fragment | NA    | 0     |
| S8_k141_242099                                 | 1230  | No  | NA | 0     | 3             | Not-determined  | Genome-fragment | NA    | 0     |
| S12-final-viral-combined_k141_11628[full       | 18856 | No  | NA | 10    | 0             | Low-quality     | Genome-fragment | 49.73 | 0     |
| S8_k141_80862                                  | 1036  | No  | NA | 0     | 0             | Not-determined  | Genome-fragment | NA    | 0     |
| S8_k141_184459                                 | 5936  | No  | NA | 0     | 3             | Not-determined  | Genome-fragment | NA    | 0     |
| S8_k141_230690                                 | 1528  | No  | NA | 0     | 0             | Not-determined  | Genome-fragment | NA    | 0     |
| S8-final-viral-combined_k141_52198[full        | 18856 | No  | NA | 11    | 0             | Low-quality     | Genome-fragment | 40.92 | 0     |
| S8_k141_23277                                  | 1013  | No  | NA | 0     | 0             | Not-determined  | Genome-fragment | NA    | 0     |
| S8_k141_1737007                                | 1307  | No  | NA | 0     | 2             | Not-determined  | Genome-fragment | NA    | 0     |
| S8_k141_222                                    | 1316  | No  | NA | 0     | 1             | Not-determined  | Genome-fragment | NA    | 0     |
| S8_k141_92403                                  | 3293  | No  | NA | 0     | 2             | Not-determined  | Genome-fragment | NA    | 0     |
| S8_k141_229                                    | 1632  | No  | NA | 0     | 1             | Not-determined  | Genome-fragment | NA    | 0     |
| S8_k141_138552                                 | 3115  | No  | NA | 0     | 0             | Not-determined  | Genome-fragment | NA    | 0     |
| S8_k141_161339                                 | 1371  | No  | NA | 0     | 0             | Not-determined  | Genome-fragment | NA    | 0     |
| S8_k141_138615                                 | 1200  | No  | NA | 0     | 0             | Not-determined  | Genome-fragment | NA    | 0     |
| S8_k141_270                                    | 5400  | No  | NA | 2     | 0             | High-quality    | High-quality    | 97.67 | 0     |
| S5-final-viral-combined_k141_63378[0_partial   | 18880 | Yes | NA | 11688 | 3             | 7 Low-quality   | Genome-fragment | 22.24 | 38.09 |
| S8_k141_81005                                  | 4305  | No  | NA | 0     | 1             | Not-determined  | Genome-fragment | NA    | 0     |
| S8_k141_184560                                 | 1678  | No  | NA | 0     | 0             | Not-determined  | Genome-fragment | NA    | 0     |
| S7_k141_152458                                 | 18889 | No  | NA | 8     | 0             | Low-quality     | Genome-fragment | 30.36 | 0     |
| S8_k141_23350                                  | 1023  | No  | NA | 0     | 1             | Not-determined  | Genome-fragment | NA    | 0     |
| S5-final-viral-combined_k141_9528[0_partial    | 18892 | No  | NA | 2     | 8             | Low-quality     | Genome-fragment | 9.54  | 0     |
| S8_k141_242246                                 | 1227  | No  | NA | 0     | 2             | Not-determined  | Genome-fragment | NA    | 0     |
| S8_k141_215089                                 | 1846  | No  | NA | 0     | 1             | Not-determined  | Genome-fragment | NA    | 0     |
| S11-final-viral-combined_k141_48716[full       | 18904 | No  | NA | 12    | 1             | Low-quality     | Genome-fragment | 39.11 | 0     |
| S6-final-viral-combined_k141_134039[full       | 18926 | No  | NA | 8     | 0             | Low-quality     | Genome-fragment | 46.02 | 0     |
| S8_k141_27935                                  | 1277  | No  | NA | 0     | 1             | Not-determined  | Genome-fragment | NA    | 0     |
| S11-final-viral-combined_k141_236944[full      | 18951 | No  | NA | 13    | 0             | Low-quality     | Genome-fragment | 39.93 | 0     |
| S8_k141_173163                                 | 4662  | No  | NA | 0     | 2             | Not-determined  | Genome-fragment | NA    | 0     |
| S8_k141_69507                                  | 1212  | No  | NA | 0     | 1             | Not-determined  | Genome-fragment | NA    | 0     |
| S8_k141_81045                                  | 1095  | No  | NA | 0     | 0             | Not-determined  | Genome-fragment | NA    | 0     |
| S8_k141_253667                                 | 1048  | No  | NA | 0     | 0             | Not-determined  | Genome-fragment | NA    | 0     |
| S8_k141_151516                                 | 1659  | No  | NA | 0     | 2             | Not-determined  | Genome-fragment | NA    | 0     |
| S8_k141_230914                                 | 2118  | No  | NA | 0     | 0             | Not-determined  | Genome-fragment | NA    | 0     |
| S7-final-viral-combined_k141_172366[full       | 18956 | No  | NA | 2     | 0             | Low-quality     | Genome-fragment | 32.12 | 0     |
| S8_k141_58021                                  | 1997  | No  | NA | 0     | 1             | Not-determined  | Genome-fragment | NA    | 0     |
| S2-final-viral-combined_k141_88706[full        | 18963 | No  | NA | 1     | 1             | Low-quality     | Genome-fragment | 21.29 | 0     |
| S12_k141_202330                                | 18969 | No  | NA | 7     | 1             | Low-quality     | Genome-fragment | 45.03 | 0     |
| S8_k141_127075                                 | 3035  | No  | NA | 0     | 1             | Not-determined  | Genome-fragment | NA    | 0     |
| S8_k141_161455                                 | 1919  | No  | NA | 0     | 1             | Not-determined  | Genome-fragment | NA    | 0     |
| S2-final-viral-combined_k141_9600[0_partial    | 18974 | No  | NA | 1     | 8             | Low-quality     | Genome-fragment | 42.63 | 0     |
| S2-final-viral-combined_k141_16441[full        | 18975 | Yes | NA | 12161 | 3             | 3 Low-quality   | Genome-fragment | 11.88 | 35.91 |
| S8_k141_102929                                 | 9270  | No  | NA | 0     | 4             | Not-determined  | Genome-fragment | NA    | 0     |
| S8_k141_196198                                 | 4718  | No  | NA | 0     | 0             | Not-determined  | Genome-fragment | NA    | 0     |
| S8_k141_11823                                  | 4619  | No  | NA | 0     | 3             | Not-determined  | Genome-fragment | NA    | 0     |
| S8_k141_161463                                 | 1668  | No  | NA | 0     | 1             | Not-determined  | Genome-fragment | NA    | 0     |
| S8_k141_173128                                 | 3077  | No  | NA | 0     | 2             | Not-determined  | Genome-fragment | NA    | 0     |
| S8_k141_219177                                 | 1365  | No  | NA | 0     | 2             | Not-determined  | Genome-fragment | NA    | 0     |
| S8_k141_151584                                 | 1746  | No  | NA | 0     | 1             | Not-determined  | Genome-fragment | NA    | 0     |
| S8_k141_103948                                 | 3880  | No  | NA | 0     | 3             | Not-determined  | Genome-fragment | NA    | 0     |
| S8_k141_23519                                  | 1407  | No  | NA | 0     | 0             | Not-determined  | Genome-fragment | NA    | 0     |
| S5-final-viral-combined_k141_42369[full        | 18980 | No  | NA | 5     | 0             | Low-quality     | Genome-fragment | 45.87 | 0     |
| S8_k141_81191                                  | 2819  | No  | NA | 0     | 1             | Not-determined  | Genome-fragment | NA    | 0     |
| S8_k141_81205                                  | 3788  | No  | NA | 0     | 1             | Not-determined  | Genome-fragment | NA    | 0     |
| S8_k141_173323                                 | 1043  | No  | NA | 0     | 1             | Not-determined  | Genome-fragment | NA    | 0     |
| S8_k141_219282                                 | 1183  | No  | NA | 0     | 0             | Not-determined  | Genome-fragment | NA    | 0     |
| S12-final-viral-combined_k141_389739[full      | 18987 | No  | NA | 11    | 0             | Low-quality     | Genome-fragment | NA    | 0     |
| S2_k141_112556                                 | 19005 | No  | NA | 1     | 2             | Low-quality     | Genome-fragment | 17.36 | 0     |
| S8_k141_219299                                 | 1063  | No  | NA | 0     | 1             | Not-determined  | Genome-fragment | NA    | 0     |
| S8_k141_241370                                 | 1376  | No  | NA | 0     | 0             | Not-determined  | Genome-fragment | NA    | 0     |
| S17-final-viral-combined_k141_112180[0_partial | 19006 | Yes | NA | 13186 | 5             | 2 Low-quality   | Genome-fragment | 16.35 | 30.62 |
| S8_k141_127149                                 | 1106  | No  | NA | 0     | 1             | Not-determined  | Genome-fragment | NA    | 0     |
| S5-final-viral-combined_k141_107308[full       | 19018 | No  | NA | 7     | 0             | Low-quality     | Genome-fragment | 48.53 | 0     |
| S2-final-viral-combined_k141_132917[full       | 19029 | No  | NA | 0     | 10            | Low-quality     | Genome-fragment | 10.24 | 0     |
| S8_k141_253780                                 | 3976  | No  | NA | 0     | 0             | Not-determined  | Genome-fragment | NA    | 0     |
| S8_k141_11962                                  | 4823  | No  | NA | 0     | 1             | Not-determined  | Genome-fragment | NA    | 0     |
| S5-final-viral-combined_k141_109133[0_partial  | 19032 | No  | NA | 1     | 1             | Low-quality     | Genome-fragment | 10.5  | 0     |
| S2-final-viral-combined_k141_155788[full       | 19081 | No  | NA | 0     | 12            | Low-quality     | Genome-fragment | 16.79 | 0     |
| S8_k141_219376                                 | 3265  | No  | NA | 0     | 1             | Not-determined  | Genome-fragment | NA    | 0     |
| S2-final-viral-combined_k141_45779[0_partial   | 19112 | Yes | NA | 6372  | 5             | 7 Low-quality   | Genome-fragment | 13.58 | 66.68 |
| S8_k141_81318                                  | 1149  | No  | NA | 0     | 0             | Not-determined  | Genome-fragment | NA    | 0     |
| S8_k141_265330                                 | 2606  | No  | NA | 0     | 2             | Not-determined  | Genome-fragment | NA    | 0     |
| S8_k141_173421                                 | 1198  | No  | NA | 0     | 0             | Not-determined  | Genome-fragment | NA    | 0     |
| S8_k141_12006                                  | 5363  | No  | NA | 0     | 5             | Not-determined  | Genome-fragment | NA    | 0     |
| S8_k141_161685                                 | 5210  | No  | NA | 0     | 2             | Not-determined  | Genome-fragment | NA    | 0     |
| S8_k141_173430                                 | 3107  | No  | NA | 0     | 0             | Not-determined  | Genome-fragment | NA    | 0     |
| S8_k141_219410                                 | 5829  | No  | NA | 0     | 3             | Not-determined  | Genome-fragment | NA    | 0     |
| S8_k141_92847                                  | 1908  | No  | NA | 0     | 1             | Not-determined  | Genome-fragment | NA    | 0     |
| S8_k141_127191                                 | 59987 | No  | NA | 31    | 0             | High-quality    | High-quality    | 97.01 | 0     |
| S8-final-viral-combined_k141_31732[full        | 19133 | No  | NA | 2     | 0             | Low-quality     | Genome-fragment | 42.55 | 0     |
| S8_k141_231044                                 | 4349  | No  | NA | 0     | 3             | Not-determined  | Genome-fragment | NA    | 0     |
| S5-final-viral-combined_k141_188623[full       | 19188 | Yes | NA | 9680  | 3             | 4 Low-quality   | Genome-fragment | 8.94  | 40.55 |
| S8_k141_265574                                 | 7953  | No  | NA | 0     | 0             | Not-determined  | Genome-fragment | NA    | 0     |
| S8_k141_23645                                  | 1206  | No  | NA | 0     | 0             | Not-determined  | Genome-fragment | NA    | 0     |
| S8_k141_161763                                 | 5106  | No  | NA | 0     | 2             | Not-determined  | Genome-fragment | NA    | 0     |
| S2_k141_109866                                 | 19228 | No  | NA | 1     | 0             | Low-quality     | Genome-fragment | 12.9  | 0     |
| S5-final-viral-combined_k141_29589[full        | 19233 | No  | NA | 0     | 6             | Low-quality     | Genome-fragment | 41.37 | 0     |
| S8_k141_58371                                  | 1580  | No  | NA | 0     | 1             | Not-determined  | Genome-fragment | NA    | 0     |
| S8_k141                                        |       |     |    |       |               |                 |                 |       |       |



|                                                 |       |     |    |       |    |                |                 |                 |       |       |
|-------------------------------------------------|-------|-----|----|-------|----|----------------|-----------------|-----------------|-------|-------|
| S8_k141_254043                                  | 5204  | No  | NA | 0     | 4  | Not-determined | Genome-fragment | NA              | 0     | 0     |
| S8_k141_254045                                  | 1099  | No  | NA | 0     | 1  | Not-determined | Genome-fragment | NA              | 0     | 0     |
| S8_k141_23891                                   | 1702  | No  | NA | 0     | 1  | Not-determined | Genome-fragment | NA              | 0     | 0     |
| S8_k141_81584                                   | 1905  | No  | NA | 0     | 2  | Not-determined | Genome-fragment | NA              | 0     | 0     |
| S8_k141_219643                                  | 1243  | No  | NA | 0     | 1  | Not-determined | Genome-fragment | NA              | 0     | 0     |
| S8_k141_162003                                  | 1904  | No  | NA | 0     | 2  | Not-determined | Genome-fragment | NA              | 0     | 0     |
| S8_k141_208240                                  | 3044  | No  | NA | 0     | 1  | Not-determined | Genome-fragment | NA              | 0     | 0     |
| S8_k141_265774                                  | 3029  | No  | NA | 0     | 3  | Not-determined | Genome-fragment | NA              | 0     | 0     |
| S8_k141_58515                                   | 22508 | No  | NA | 0     | 7  | Medium-quality | Genome-fragment | NA              | 55.52 | 0     |
| S8_k141_265789                                  | 1012  | No  | NA | 0     | 0  | Not-determined | Genome-fragment | NA              | 0     | 0     |
| S5-final-viral-combined_k141_108718 [0_partial  | 19536 | No  | NA | 11    | 0  | Low-quality    | Genome-fragment | NA              | 47.99 | 0     |
| S8_k141_252116                                  | 1235  | No  | NA | 0     | 0  | Not-determined | Genome-fragment | NA              | 0     | 0     |
| S8_k141_116020                                  | 1006  | No  | NA | 0     | 1  | Not-determined | Genome-fragment | NA              | 0     | 0     |
| S8_k141_139289                                  | 2255  | No  | NA | 0     | 1  | Not-determined | Genome-fragment | NA              | 0     | 0     |
| S8_k141_242952                                  | 3131  | No  | NA | 0     | 0  | Not-determined | Genome-fragment | NA              | 0     | 0     |
| S9_k141_214886                                  | 19520 | No  | NA | 1     | 10 | Low-quality    | Genome-fragment | NA              | 5.53  | 0     |
| S8_k141_937                                     | 1687  | No  | NA | 0     | 2  | Not-determined | Genome-fragment | NA              | 0     | 0     |
| S8_k141_150663                                  | 1007  | No  | NA | 0     | 0  | Not-determined | Genome-fragment | NA              | 0     | 0     |
| S8_k141_172847                                  | 3624  | No  | NA | 0     | 0  | Not-determined | Genome-fragment | NA              | 0     | 0     |
| S8_k141_173849                                  | 5631  | No  | NA | 0     | 2  | Not-determined | Genome-fragment | NA              | 0     | 0     |
| S2-final-viral-combined_k141_120238 [full       | 19574 | No  | NA | 13    | 1  | Low-quality    | Genome-fragment | NA              | 36.58 | 0     |
| S8_k141_254160                                  | 2227  | No  | NA | 0     | 0  | Not-determined | Genome-fragment | NA              | 0     | 0     |
| S12-final-viral-combined_k141_110869 [full      | 19603 | No  | NA | 3     | 1  | Low-quality    | Genome-fragment | NA              | 29.33 | 0     |
| S8_k141_81657                                   | 1117  | No  | NA | 0     | 1  | Not-determined | Genome-fragment | NA              | 0     | 0     |
| S8_k141_242989                                  | 1068  | No  | NA | 0     | 0  | Not-determined | Genome-fragment | NA              | 0     | 0     |
| S8_k141_180788                                  | 2189  | No  | NA | 0     | 1  | Not-determined | Genome-fragment | NA              | 0     | 0     |
| S8_k141_150705                                  | 3019  | No  | NA | 0     | 3  | Not-determined | Genome-fragment | NA              | 0     | 0     |
| S8_k141_58600                                   | 1157  | No  | NA | 0     | 0  | Not-determined | Genome-fragment | NA              | 0     | 0     |
| S8_k141_127187                                  | 2053  | No  | NA | 0     | 1  | Not-determined | Genome-fragment | NA              | 0     | 0     |
| S4-final-viral-combined_k141_163530 [full       | 19625 | No  | NA | 18    | 0  | Low-quality    | Genome-fragment | NA              | 47.81 | 0     |
| S2-final-viral-combined_k141_22422 [full        | 19643 | No  | NA | 1     | 4  | Low-quality    | Genome-fragment | NA              | 30.14 | 0     |
| S8_k141_162176                                  | 1721  | No  | NA | 0     | 0  | Not-determined | Genome-fragment | NA              | 0     | 0     |
| S8_k141_243079                                  | 1081  | No  | NA | 0     | 0  | Not-determined | Genome-fragment | NA              | 0     | 0     |
| S8_k141_185329                                  | 1232  | No  | NA | 0     | 2  | Not-determined | Genome-fragment | NA              | 0     | 0     |
| S11-final-viral-combined_k141_218161 [full      | 19686 | No  | NA | 9     | 1  | Low-quality    | Genome-fragment | NA              | 35.58 | 0     |
| S2-final-viral-combined_k141_63018 [full        | 19713 | No  | NA | 3     | 6  | Low-quality    | Genome-fragment | NA              | 12.53 | 0     |
| S8_k141_231580                                  | 1372  | No  | NA | 0     | 1  | Not-determined | Genome-fragment | NA              | 0     | 0     |
| S8_k141_254310                                  | 1929  | No  | NA | 0     | 2  | Not-determined | Genome-fragment | NA              | 0     | 0     |
| S11-final-viral-combined_k141_34424 [full       | 19809 | No  | NA | 18    | 2  | Low-quality    | Genome-fragment | NA              | 45.4  | 0     |
| S8_k141_58755                                   | 1711  | No  | NA | 0     | 1  | Not-determined | Genome-fragment | NA              | 0     | 0     |
| S7-final-viral-combined_k141_80611 [full        | 19831 | No  | NA | 10    | 0  | Low-quality    | Genome-fragment | NA              | 40.96 | 0     |
| S8_k141_261150                                  | 19845 | No  | NA | 0     | 1  | Low-quality    | Genome-fragment | NA              | 7.23  | 0     |
| S11-final-viral-combined_k141_306975 [0_partial | 19848 | No  | NA | 1     | 8  | Low-quality    | Genome-fragment | NA              | 42.69 | 0     |
| S12-final-viral-combined_k141_227408 [full      | 19857 | Yes | NA | 9760  | 3  | 11             | Low-quality     | Genome-fragment | 23.5  | 50.85 |
| S8_k141_116229                                  | 9095  | No  | NA | 0     | 3  | Not-determined | Genome-fragment | NA              | 0     | 0     |
| S8_k141_139536                                  | 1360  | No  | NA | 0     | 2  | Not-determined | Genome-fragment | NA              | 0     | 0     |
| S2-final-viral-combined_k141_163855 [full       | 19885 | No  | NA | 5     | 0  | Low-quality    | Genome-fragment | NA              | 37.39 | 0     |
| S5-final-viral-combined_k141_71542 [full        | 19893 | No  | NA | 1     | 10 | Low-quality    | Genome-fragment | NA              | 10.79 | 0     |
| S8_k141_127774                                  | 1470  | No  | NA | 0     | 1  | Not-determined | Genome-fragment | NA              | 0     | 0     |
| S8_k141_208682                                  | 1014  | No  | NA | 0     | 3  | Not-determined | Genome-fragment | NA              | 0     | 0     |
| S7_k141_385                                     | 19914 | No  | NA | 3     | 0  | Low-quality    | Genome-fragment | NA              | 21.37 | 0     |
| S7-final-viral-combined_k141_85541 [full        | 19919 | Yes | NA | 11474 | 4  | Low-quality    | Genome-fragment | NA              | 19.64 | 42.4  |
| S8_k141_127805                                  | 3009  | No  | NA | 0     | 1  | Not-determined | Genome-fragment | NA              | 0     | 0     |
| S8_k141_162312                                  | 1154  | No  | NA | 0     | 0  | Not-determined | Genome-fragment | NA              | 0     | 0     |
| S8_k141_24224                                   | 2080  | No  | NA | 0     | 2  | Not-determined | Genome-fragment | NA              | 0     | 0     |
| S9_k141_108429                                  | 19922 | No  | NA | 16    | 0  | Low-quality    | Genome-fragment | NA              | 42.88 | 0     |
| S8_k141_127810                                  | 1787  | No  | NA | 0     | 0  | Not-determined | Genome-fragment | NA              | 0     | 0     |
| S8_k141_24241                                   | 1054  | No  | NA | 0     | 0  | Not-determined | Genome-fragment | NA              | 0     | 0     |
| S8_k141_243270                                  | 1529  | No  | NA | 0     | 1  | Not-determined | Genome-fragment | NA              | 0     | 0     |
| S5-final-viral-combined_k141_11978 [full        | 19928 | No  | NA | 2     | 1  | Low-quality    | Genome-fragment | NA              | 12.37 | 0     |
| S7-final-viral-combined_k141_198152 [0_partial  | 19931 | Yes | NA | 9260  | 5  | 7              | Low-quality     | Genome-fragment | 23.74 | 53.54 |
| S9-final-viral-combined_k141_14106 [0_partial   | 19935 | Yes | NA | 10212 | 6  | 6              | Low-quality     | Genome-fragment | 10.45 | 48.77 |
| S8_k141_116347                                  | 1155  | No  | NA | 0     | 1  | Not-determined | Genome-fragment | NA              | 0     | 0     |
| S8_k141_93552                                   | 1413  | No  | NA | 0     | 1  | Not-determined | Genome-fragment | NA              | 0     | 0     |
| S8_k141_243110                                  | 1684  | No  | NA | 0     | 1  | Not-determined | Genome-fragment | NA              | 0     | 0     |
| S8_k141_70495                                   | 1905  | No  | NA | 0     | 1  | Not-determined | Genome-fragment | NA              | 0     | 0     |
| S8_k141_93558                                   | 4868  | No  | NA | 0     | 1  | Not-determined | Genome-fragment | NA              | 0     | 0     |
| S8_k141_70503                                   | 1051  | No  | NA | 0     | 1  | Not-determined | Genome-fragment | NA              | 0     | 0     |
| S8_k141_116170                                  | 10016 | No  | NA | 0     | 2  | Not-determined | Genome-fragment | NA              | 0     | 0     |
| S8_k141_116393                                  | 1040  | No  | NA | 0     | 0  | Not-determined | Genome-fragment | NA              | 0     | 0     |
| S17-final-viral-combined_k141_122180 [0_partial | 19939 | No  | NA | 1     | 8  | Low-quality    | Genome-fragment | NA              | 8.1   | 0     |
| S7-final-viral-combined_k141_157107 [full       | 19937 | Yes | NA | 9754  | 3  | 8              | Low-quality     | Genome-fragment | 21.84 | 51.12 |
| S8_k141_70567                                   | 1002  | No  | NA | 0     | 1  | Not-determined | Genome-fragment | NA              | 0     | 0     |
| S8_k141_162433                                  | 1178  | No  | NA | 0     | 0  | Not-determined | Genome-fragment | NA              | 0     | 0     |
| S8_k141_59027                                   | 4331  | No  | NA | 0     | 2  | Not-determined | Genome-fragment | NA              | 0     | 0     |
| S8_k141_243382                                  | 4541  | No  | NA | 0     | 1  | Not-determined | Genome-fragment | NA              | 0     | 0     |
| S8_k141_139732                                  | 4560  | No  | NA | 0     | 1  | Not-determined | Genome-fragment | NA              | 0     | 0     |
| S5-final-viral-combined_k141_183414 [full       | 19974 | No  | NA | 9     | 0  | Low-quality    | Genome-fragment | NA              | 43.32 | 0     |
| S7_k141_241878                                  | 19993 | No  | NA | 0     | 1  | Low-quality    | Genome-fragment | NA              | 18.77 | 0     |
| S12-final-viral-combined_k141_282695 [full      | 19997 | Yes | NA | 8609  | 5  | 7              | Low-quality     | Genome-fragment | 16.94 | 56.95 |
| S8_k141_35554                                   | 20024 | No  | NA | 6     | 1  | Low-quality    | Genome-fragment | NA              | 46.6  | 0     |
| S8_k141_1621492                                 | 1095  | No  | NA | 0     | 1  | Not-determined | Genome-fragment | NA              | 0     | 0     |
| S8_k141_12475                                   | 3663  | No  | NA | 0     | 0  | Not-determined | Genome-fragment | NA              | 0     | 0     |
| S8_k141_139778                                  | 4507  | No  | NA | 0     | 4  | Not-determined | Genome-fragment | NA              | 0     | 0     |
| S7-final-viral-combined_k141_227291 [full       | 20070 | No  | NA | 6     | 2  | Low-quality    | Genome-fragment | NA              | 29.1  | 0     |
| S8_k141_162524                                  | 1624  | No  | NA | 0     | 1  | Not-determined | Genome-fragment | NA              | 0     | 0     |
| S8_k141_1230                                    | 1472  | No  | NA | 0     | 1  | Not-determined | Genome-fragment | NA              | 0     | 0     |
| S8_k141_82127                                   | 1627  | No  | NA | 0     | 0  | Not-determined | Genome-fragment | NA              | 0     | 0     |
| S8_k141_82145                                   | 1248  | No  | NA | 0     | 1  | Not-determined | Genome-fragment | NA              | 0     | 0     |
| S8_k141_24471                                   | 3228  | No  | NA | 0     | 2  | Not-determined | Genome-fragment | NA              | 0     | 0     |
| S8_k141_82165                                   | 1250  | No  | NA | 0     | 1  | Not-determined | Genome-fragment | NA              | 0     | 0     |
| S8_k141_266078                                  | 1258  | No  | NA | 0     | 1  | Not-determined | Genome-fragment | NA              | 0     | 0     |
| S8_k141_151152                                  | 1323  | No  | NA | 0     | 1  | Not-determined | Genome-fragment | NA              | 0     | 0     |
| S8_k141_1292                                    | 1304  | No  | NA | 0     | 1  | Not-determined | Genome-fragment | NA              | 0     | 0     |
| S1-final-viral-combined_k141_73553 [full        | 20073 | Yes | NA | 9701  | 4  | 8              | Low-quality     | Genome-fragment | 11.55 | 51.67 |
| S8_k141_24513                                   | 1011  | No  | NA | 0     | 0  | Not-determined | Genome-fragment | NA              | 0     | 0     |
| S8_k141_162631                                  | 4544  | No  | NA | 0     | 2  | Not-determined | Genome-fragment | NA              | 0     | 0     |
| S8_k141_47350                                   | 1027  | No  | NA | 0     | 1  | Not-determined | Genome-fragment | NA              | 0     | 0     |
| S8_k141_185867                                  | 1137  | No  | NA | 0     | 1  | Not-determined | Genome-fragment | NA              | 0     | 0     |
| S12-final-viral-combined_k141_83483 [full       | 20074 | No  | NA | 2     | 0  | Low-quality    | Genome-fragment | NA              | 25.9  | 0     |
| S1-final-viral-combined_k141_136732 [full       | 20118 | Yes | NA | 6901  | 2  | 9              | Low-quality     | Genome-fragment | 11.44 | 65.7  |
| S12-final-viral-combined_k141_238954 [full      | 20121 | Yes | NA | 13681 | 3  | 8              | Low-quality     | Genome-fragment | 27.25 | 32.01 |
| S8_k141_12520                                   | 4142  | No  | NA | 0     | 4  | Not-determined | Genome-fragment | NA              | 0     | 0     |
| S8_k141_24581                                   | 1300  | No  | NA | 0     | 0  | Not-determined | Genome-fragment | NA              | 0     | 0     |
| S8_k141_151277                                  | 1014  | No  | NA | 0     | 2  | Not-determined | Genome-fragment | NA              | 0     | 0     |
| S8_k141_243565                                  | 1579  | No  | NA | 0     | 1  | Not-determined | Genome-fragment | NA              | 0     | 0     |
| S8_k141_232029                                  | 1007  | No  | NA | 0     | 2  | Not-determined | Genome-fragment | NA              | 0     | 0     |
| S4-final-viral-combined_k141_20070 [0_partial   | 20134 | No  | NA | 0     | 7  | Low-quality    | Genome-fragment | NA              | 6.15  | 0     |
| S5-final-viral-combined_k141_141803 [0_partial  | 20141 | Yes | NA | 12949 | 3  | 1              | Low-quality     | Genome-fragment | 28.04 | 35.71 |
| S8_k141_232046                                  | 1224  | No  | NA | 0     | 1  | Not-determined | Genome-fragment | NA              | 0     | 0     |
| S8_k141_174356                                  | 1018  | No  | NA | 0     | 0  | Not-determined | Genome-fragment | NA              | 0     | 0     |
| S8_k141_230720                                  | 20153 | No  | NA | 3     | 0  | Low-quality    | Genome-fragment | NA              | 39.73 | 0     |
| S8_k141_59387                                   | 1225  | No  | NA | 0     | 0  | Not-determined | Genome-fragment | NA              | 0     | 0     |
| S8_k141_139981                                  | 1402  | No  | NA | 0     | 0  | Not-determined | Genome-fragment | NA              | 0     | 0     |
| S8-final-viral-combined_k141_219682 [0_partial  | 20162 | No  | NA | 2     | 8  | Low-quality    | Genome-fragment | NA              | 14.8  | 0     |
| S5-final-viral-combined_k141_174931 [full       | 20174 | No  | NA | 0     | 9  | Low-quality    | Genome-fragment | NA              | 1.8   | 0     |
| S8_k141_105141                                  | 3850  | No  | NA | 0     | 2  | Not-determined | Genome-fragment | NA              | 0     | 0     |
| S8_k141_93834                                   | 1460  | No  | NA | 0     | 2  | Not-determined | Genome-fragment | NA              | 0     | 0     |
| S8_k141_88934                                   | 2302  | No  | NA | 0     | 1  | Not-determined | Genome-fragment | NA              | 0     | 0     |
| S8_k141_266274                                  | 1036  | No  | NA | 0     | 1  | Not-determined | Genome-fragment | NA              | 0     | 0     |
| S9-final-viral-combined_k141_71523 [0_partial   | 20195 | No  | NA | 0     | 11 | Low-quality    | Genome-fragment | NA              | 13.04 | 0     |
| S8_k141_243651                                  | 1515  | No  | NA | 0     | 0  | Not-determined | Genome-fragment | NA              | 0     | 0     |
| S8_k141_116600                                  | 1190  | No  | NA | 0     | 1  | Not-determined | Genome-fragment | NA              | 0     | 0     |
| S8_k141_151342                                  | 1211  | No  | NA | 0     | 0  | Not-determined | Genome-fragment | NA              | 0     | 0     |
| S8_k141_266382                                  | 1289  | No  | NA | 0     | 2  | Not-determined | Genome-fragment | NA              | 0     | 0     |
| S8_k141_174394                                  | 1279  | No  | NA | 0     | 2  | Not-determined | Genome-fragment | NA              | 0     | 0     |
| S8_k141_70891                                   | 1227  | No  | NA | 0     | 0  | Not-determined | Genome-fragment | NA              | 0     | 0     |
| S5-final-viral-combined_k141_41953 [0_partial   | 20203 | Yes | NA | 10977 | 2  | 7              | Low-quality     | Genome-fragment | 28.42 | 45.67 |
| S8_k141_116634                                  | 2237  | No  | NA | 0     | 2  | Not-determined | Genome-fragment | NA              | 0     | 0     |
| S8_k141_105169                                  | 1084  | No  | NA | 0     | 1  | Not-determined | Genome-fragment | NA              | 0     | 0     |
| S8_k141_254663                                  | 1808  | No  | NA | 0     | 2  | Not-determined | Genome-fragment | NA              | 0     | 0     |
| S8_k141_70926                                   | 1071  | No  | NA | 0     | 0  | Not-determined | Genome-fragment | NA              | 0     | 0     |
| S8-final-viral-combined_k141_186488 [full       | 20245 | No  | NA | 11    | 0  | Low-quality    | Genome-fragment | NA              | 45.14 | 0     |
| S8_k141_151434                                  | 4545  | No  |    |       |    |                |                 |                 |       |       |



|                |       |     |    |       |    |                |                 |                 |       |       |
|----------------|-------|-----|----|-------|----|----------------|-----------------|-----------------|-------|-------|
| S8_k141_232377 | 20547 | No  | NA | 9     | 0  | Low-quality    | Genome-fragment | 49.66           | 0     |       |
| S8_k141_128493 | 10913 | No  | NA | 0     | 10 | Not-determined | Genome-fragment | NA              | 0     |       |
| S8_k141_140482 | 3996  | No  | NA | 0     | 2  | Not-determined | Genome-fragment | NA              | 0     |       |
| S8_k141_140475 | 2370  | No  | NA | 0     | 2  | Not-determined | Genome-fragment | NA              | 0     |       |
| S8_k141_186349 | 20562 | No  | NA | 1     | 0  | Low-quality    | Genome-fragment | 13.18           | 0     |       |
| S8_k141_232449 | 1719  | No  | NA | 0     | 1  | Not-determined | Genome-fragment | NA              | 0     |       |
| S8_k141_71260  | 1336  | No  | NA | 0     | 1  | Not-determined | Genome-fragment | NA              | 0     |       |
| S8_k141_140475 | 1110  | No  | NA | 0     | 2  | Not-determined | Genome-fragment | NA              | 0     |       |
| S8_k141_140475 | 2112  | No  | NA | 0     | 0  | Not-determined | Genome-fragment | NA              | 0     |       |
| S8_k141_140475 | 1464  | No  | NA | 0     | 0  | Not-determined | Genome-fragment | NA              | 0     |       |
| S8_k141_140475 | 20581 | Yes | NA | 4     | 7  | Low-quality    | Genome-fragment | 35.43           | 28.65 |       |
| S8_k141_140475 | 2675  | No  | NA | 0     | 2  | Not-determined | Genome-fragment | NA              | 0     |       |
| S8_k141_140475 | 3255  | No  | NA | 0     | 1  | Not-determined | Genome-fragment | NA              | 0     |       |
| S8_k141_140475 | 3496  | No  | NA | 0     | 1  | Not-determined | Genome-fragment | NA              | 0     |       |
| S8_k141_140475 | 20629 | No  | NA | 1     | 1  | Low-quality    | Genome-fragment | 13.41           | 0     |       |
| S8_k141_140475 | 1317  | No  | NA | 0     | 1  | Not-determined | Genome-fragment | NA              | 0     |       |
| S8_k141_140475 | 20720 | Yes | NA | 7     | 8  | Low-quality    | Genome-fragment | 21.19           | 63.88 |       |
| S8_k141_140475 | 7647  | No  | NA | 0     | 0  | Not-determined | Genome-fragment | NA              | 0     |       |
| S8_k141_140475 | 20821 | Yes | NA | 14    | 2  | Low-quality    | Genome-fragment | 47.47           | 12.66 |       |
| S8_k141_140475 | 1165  | No  | NA | 0     | 1  | Not-determined | Genome-fragment | NA              | 0     |       |
| S8_k141_140475 | 1307  | No  | NA | 0     | 1  | Not-determined | Genome-fragment | NA              | 0     |       |
| S8_k141_140475 | 3207  | No  | NA | 0     | 2  | Not-determined | Genome-fragment | NA              | 0     |       |
| S8_k141_140475 | 20840 | No  | NA | 14    | 0  | Low-quality    | Genome-fragment | 35.15           | 0     |       |
| S8_k141_140475 | 2180  | No  | NA | 0     | 1  | Not-determined | Genome-fragment | NA              | 0     |       |
| S8_k141_140475 | 20846 | Yes | NA | 2     | 9  | Low-quality    | Genome-fragment | 6.36            | 58.49 |       |
| S8_k141_140475 | 9417  | No  | NA | 0     | 7  | Not-determined | Genome-fragment | NA              | 0     |       |
| S8_k141_140475 | 1050  | No  | NA | 0     | 1  | Not-determined | Genome-fragment | NA              | 0     |       |
| S8_k141_140475 | 20862 | No  | NA | 8     | 2  | Low-quality    | Genome-fragment | 42.98           | 0     |       |
| S8_k141_140475 | 6079  | No  | NA | 0     | 2  | Not-determined | Genome-fragment | NA              | 0     |       |
| S8_k141_140475 | 1177  | No  | NA | 0     | 0  | Not-determined | Genome-fragment | NA              | 0     |       |
| S8_k141_140475 | 20873 | Yes | NA | 2     | 6  | Low-quality    | Genome-fragment | 17.5            | 32.52 |       |
| S8_k141_140475 | 2155  | No  | NA | 0     | 2  | Not-determined | Genome-fragment | NA              | 0     |       |
| S8_k141_140475 | 2333  | No  | NA | 0     | 2  | Not-determined | Genome-fragment | NA              | 0     |       |
| S8_k141_140475 | 20889 | Yes | NA | 5     | 11 | Low-quality    | Genome-fragment | 17.91           | 38.93 |       |
| S8_k141_140475 | 3174  | No  | NA | 0     | 1  | Not-determined | Genome-fragment | NA              | 0     |       |
| S8_k141_140475 | 20922 | No  | NA | 6     | 2  | Low-quality    | Genome-fragment | 28.14           | 0     |       |
| S8_k141_140475 | 20924 | No  | NA | 1     | 6  | Low-quality    | Genome-fragment | 18.92           | 0     |       |
| S8_k141_140475 | 1001  | No  | NA | 0     | 1  | Not-determined | Genome-fragment | NA              | 0     |       |
| S8_k141_140475 | 1083  | No  | NA | 0     | 1  | Not-determined | Genome-fragment | NA              | 0     |       |
| S8_k141_140475 | 1548  | No  | NA | 0     | 1  | Not-determined | Genome-fragment | NA              | 0     |       |
| S8_k141_140475 | 20936 | No  | NA | 6     | 1  | Low-quality    | Genome-fragment | 48.88           | 0     |       |
| S8_k141_140475 | 21041 | No  | NA | 0     | 5  | Low-quality    | Genome-fragment | 13.7            | 0     |       |
| S8_k141_140475 | 21052 | No  | NA | 1     | 4  | Low-quality    | Genome-fragment | 15.17           | 0     |       |
| S8_k141_140475 | 2006  | No  | NA | 0     | 0  | Not-determined | Genome-fragment | NA              | 0     |       |
| S8_k141_140475 | 1541  | No  | NA | 0     | 1  | Not-determined | Genome-fragment | NA              | 0     |       |
| S8_k141_140475 | 21068 | Yes | NA | 6     | 7  | Low-quality    | Genome-fragment | 30.47           | 43.57 |       |
| S8_k141_140475 | 1086  | No  | NA | 0     | 0  | Not-determined | Genome-fragment | NA              | 0     |       |
| S8_k141_140475 | 1052  | No  | NA | 0     | 1  | Not-determined | Genome-fragment | NA              | 0     |       |
| S8_k141_140475 | 2295  | No  | NA | 0     | 1  | Not-determined | Genome-fragment | NA              | 0     |       |
| S8_k141_140475 | 1278  | No  | NA | 0     | 2  | Not-determined | Genome-fragment | NA              | 0     |       |
| S8_k141_140475 | 21151 | No  | NA | 2     | 0  | Low-quality    | Genome-fragment | 17.02           | 0     |       |
| S8_k141_140475 | 21152 | No  | NA | 4     | 0  | Low-quality    | Genome-fragment | 37.86           | 0     |       |
| S8_k141_140475 | 1139  | No  | NA | 0     | 1  | Not-determined | Genome-fragment | NA              | 0     |       |
| S8_k141_140475 | 2853  | No  | NA | 0     | 1  | Not-determined | Genome-fragment | NA              | 0     |       |
| S8_k141_140475 | 1524  | No  | NA | 0     | 0  | Not-determined | Genome-fragment | NA              | 0     |       |
| S8_k141_140475 | 1030  | No  | NA | 0     | 0  | Not-determined | Genome-fragment | NA              | 0     |       |
| S8_k141_140475 | 1140  | No  | NA | 0     | 2  | Not-determined | Genome-fragment | NA              | 0     |       |
| S8_k141_140475 | 21157 | Yes | NA | 2     | 7  | Low-quality    | Genome-fragment | 21.49           | 61.6  |       |
| S8_k141_140475 | 21160 | No  | NA | 2     | 1  | Low-quality    | Genome-fragment | 14.44           | 0     |       |
| S8_k141_140475 | 1149  | No  | NA | 0     | 2  | Not-determined | Genome-fragment | NA              | 0     |       |
| S8_k141_140475 | 1172  | No  | NA | 0     | 0  | Not-determined | Genome-fragment | NA              | 0     |       |
| S8_k141_140475 | 21174 | No  | NA | 12    | 0  | Low-quality    | Genome-fragment | 44.38           | 0     |       |
| S8_k141_140475 | 21202 | No  | NA | 0     | 3  | Low-quality    | Genome-fragment | 28.38           | 0     |       |
| S8_k141_140475 | 7676  | No  | NA | 0     | 3  | Not-determined | Genome-fragment | NA              | 0     |       |
| S8_k141_140475 | 1002  | No  | NA | 0     | 1  | Not-determined | Genome-fragment | NA              | 0     |       |
| S8_k141_140475 | 1389  | No  | NA | 0     | 0  | Not-determined | Genome-fragment | NA              | 0     |       |
| S8_k141_140475 | 21276 | No  | NA | 2     | 2  | Low-quality    | Genome-fragment | 14.78           | 0     |       |
| S8_k141_140475 | 1000  | No  | NA | 0     | 0  | Not-determined | Genome-fragment | NA              | 0     |       |
| S8_k141_140475 | 3816  | No  | NA | 0     | 0  | Not-determined | Genome-fragment | NA              | 0     |       |
| S8_k141_140475 | 21316 | No  | NA | 1     | 4  | Low-quality    | Genome-fragment | 17.06           | 0     |       |
| S8_k141_140475 | 3439  | No  | NA | 0     | 1  | Not-determined | Genome-fragment | NA              | 0     |       |
| S8_k141_140475 | 1484  | No  | NA | 0     | 2  | Not-determined | Genome-fragment | NA              | 0     |       |
| S8_k141_140475 | 21344 | Yes | NA | 8611  | 3  | 8              | Low-quality     | Genome-fragment | 11.36 | 59.66 |
| S8_k141_140475 | 1169  | No  | NA | 0     | 2  | Not-determined | Genome-fragment | NA              | 0     |       |
| S8_k141_140475 | 3028  | No  | NA | 0     | 0  | Not-determined | Genome-fragment | NA              | 0     |       |
| S8_k141_140475 | 4063  | No  | NA | 0     | 4  | Not-determined | Genome-fragment | NA              | 0     |       |
| S8_k141_140475 | 21354 | No  | NA | 2     | 3  | Low-quality    | Genome-fragment | 9.79            | 0     |       |
| S8_k141_140475 | 1200  | No  | NA | 0     | 0  | Not-determined | Genome-fragment | NA              | 0     |       |
| S8_k141_140475 | 1017  | No  | NA | 0     | 0  | Not-determined | Genome-fragment | NA              | 0     |       |
| S8_k141_140475 | 21357 | No  | NA | 4     | 4  | Low-quality    | Genome-fragment | 32.5            | 0     |       |
| S8_k141_140475 | 8770  | No  | NA | 0     | 5  | Not-determined | Genome-fragment | NA              | 0     |       |
| S8_k141_140475 | 4162  | No  | NA | 0     | 1  | Not-determined | Genome-fragment | NA              | 0     |       |
| S8_k141_140475 | 2044  | No  | NA | 0     | 0  | Not-determined | Genome-fragment | NA              | 0     |       |
| S8_k141_140475 | 3621  | No  | NA | 0     | 0  | Not-determined | Genome-fragment | NA              | 0     |       |
| S8_k141_140475 | 1420  | No  | NA | 0     | 1  | Not-determined | Genome-fragment | NA              | 0     |       |
| S8_k141_140475 | 47863 | No  | NA | 27    | 0  | Medium-quality | Genome-fragment | 63.31           | 0     |       |
| S8_k141_140475 | 1029  | No  | NA | 0     | 1  | Not-determined | Genome-fragment | NA              | 0     |       |
| S8_k141_140475 | 1360  | No  | NA | 0     | 1  | Not-determined | Genome-fragment | NA              | 0     |       |
| S8_k141_140475 | 15663 | No  | NA | 11    | 1  | Not-determined | Genome-fragment | NA              | 0     |       |
| S8_k141_140475 | 1219  | No  | NA | 0     | 1  | Not-determined | Genome-fragment | NA              | 0     |       |
| S8_k141_140475 | 1092  | No  | NA | 0     | 1  | Not-determined | Genome-fragment | NA              | 0     |       |
| S8_k141_140475 | 1113  | No  | NA | 0     | 1  | Not-determined | Genome-fragment | NA              | 0     |       |
| S8_k141_140475 | 17376 | No  | NA | 7     | 0  | Medium-quality | Genome-fragment | 81.36           | 0     |       |
| S8_k141_140475 | 1225  | No  | NA | 0     | 1  | Not-determined | Genome-fragment | NA              | 0     |       |
| S8_k141_140475 | 2535  | No  | NA | 0     | 1  | Not-determined | Genome-fragment | NA              | 0     |       |
| S8_k141_140475 | 1009  | No  | NA | 0     | 1  | Not-determined | Genome-fragment | NA              | 0     |       |
| S8_k141_140475 | 3744  | No  | NA | 0     | 3  | Not-determined | Genome-fragment | NA              | 0     |       |
| S8_k141_140475 | 1217  | No  | NA | 0     | 1  | Not-determined | Genome-fragment | NA              | 0     |       |
| S8_k141_140475 | 1439  | No  | NA | 0     | 0  | Not-determined | Genome-fragment | NA              | 0     |       |
| S8_k141_140475 | 1391  | No  | NA | 0     | 0  | Not-determined | Genome-fragment | NA              | 0     |       |
| S8_k141_140475 | 3480  | No  | NA | 0     | 0  | Not-determined | Genome-fragment | NA              | 0     |       |
| S8_k141_140475 | 21361 | No  | NA | 9     | 0  | Low-quality    | Genome-fragment | 48.36           | 0     |       |
| S8_k141_140475 | 1330  | No  | NA | 0     | 2  | Not-determined | Genome-fragment | NA              | 0     |       |
| S8_k141_140475 | 1559  | No  | NA | 0     | 1  | Not-determined | Genome-fragment | NA              | 0     |       |
| S8_k141_140475 | 21371 | No  | NA | 2     | 0  | Low-quality    | Genome-fragment | 49.9            | 0     |       |
| S8_k141_140475 | 21386 | No  | NA | 2     | 2  | Low-quality    | Genome-fragment | 36.8            | 0     |       |
| S8_k141_140475 | 3217  | No  | NA | 0     | 0  | Not-determined | Genome-fragment | NA              | 0     |       |
| S8_k141_140475 | 21417 | No  | NA | 0     | 16 | Low-quality    | Genome-fragment | 7.37            | 0     |       |
| S8_k141_140475 | 1210  | No  | NA | 0     | 0  | Not-determined | Genome-fragment | NA              | 0     |       |
| S8_k141_140475 | 1157  | No  | NA | 0     | 0  | Not-determined | Genome-fragment | NA              | 0     |       |
| S8_k141_140475 | 2072  | No  | NA | 0     | 1  | Not-determined | Genome-fragment | NA              | 0     |       |
| S8_k141_140475 | 3180  | No  | NA | 0     | 1  | Not-determined | Genome-fragment | NA              | 0     |       |
| S8_k141_140475 | 1317  | No  | NA | 0     | 1  | Not-determined | Genome-fragment | NA              | 0     |       |
| S8_k141_140475 | 1044  | No  | NA | 0     | 1  | Not-determined | Genome-fragment | NA              | 0     |       |
| S8_k141_140475 | 2320  | No  | NA | 0     | 1  | Not-determined | Genome-fragment | NA              | 0     |       |
| S8_k141_140475 | 21429 | Yes | NA | 3689  | 2  | 7              | Low-quality     | Genome-fragment | 8.01  | 82.79 |
| S8_k141_140475 | 2138  | No  | NA | 0     | 0  | Not-determined | Genome-fragment | NA              | 0     |       |
| S8_k141_140475 | 2215  | No  | NA | 0     | 0  | Not-determined | Genome-fragment | NA              | 0     |       |
| S8_k141_140475 | 1009  | No  | NA | 0     | 0  | Not-determined | Genome-fragment | NA              | 0     |       |
| S8_k141_140475 | 1711  | No  | NA | 0     | 2  | Not-determined | Genome-fragment | NA              | 0     |       |
| S8_k141_140475 | 1214  | No  | NA | 0     | 2  | Not-determined | Genome-fragment | NA              | 0     |       |
| S8_k141_140475 | 10643 | No  | NA | 0     | 0  | Not-determined | Genome-fragment | NA              | 0     |       |
| S8_k141_140475 | 1062  | No  | NA | 0     | 0  | Not-determined | Genome-fragment | NA              | 0     |       |
| S8_k141_140475 | 2355  | No  | NA | 0     | 1  | Not-determined | Genome-fragment | NA              | 0     |       |
| S8_k141_140475 | 1214  | No  | NA | 0     | 2  | Not-determined | Genome-fragment | NA              | 0     |       |
| S8_k141_140475 | 1368  | No  | NA | 0     | 2  | Not-determined | Genome-fragment | NA              | 0     |       |
| S8_k141_140475 | 1504  | No  | NA | 0     | 3  | Not-determined | Genome-fragment | NA              | 0     |       |
| S8_k141_140475 | 1010  | No  | NA | 0     | 1  | Not-determined | Genome-fragment | NA              | 0     |       |
| S8_k141_140475 | 2768  | No  | NA | 0     | 1  | Not-determined | Genome-fragment | NA              | 0     |       |
| S8_k141_140475 | 21436 | No  | NA | 1     | 4  | Low-quality    | Genome-fragment | 12.67           | 0     |       |
| S8_k141_140475 | 1855  | No  | NA | 0     | 3  | Not-determined | Genome-fragment | NA              | 0     |       |
| S8_k141_140475 | 10366 | No  | NA | 0     | 0  | Not-determined | Genome-fragment | NA              | 0     |       |
| S8_k141_140475 | 21590 | Yes | NA | 4     | 13 | Low-quality    | Genome-fragment | 10.72           | 76.63 |       |
| S8_k141_140475 | 1427  | No  | NA | 0     | 0  | Not-determined | Genome-fragment | NA              | 0     |       |
| S8_k141_140475 | 2364  | No  | NA | 0     | 0  | Not-determined | Genome-fragment | NA              | 0     |       |
| S8_k141_140475 | 3195  | No  | NA | 0     | 2  | Not-determined | Genome-fragment | NA              | 0     |       |
| S8_k141_140475 | 21608 | No  | NA | 8     | 0  | Low-quality    | Genome-fragment | 16.31           | 0     |       |
| S8_k141_140475 | 1173  | No  | NA | 0     | 1  | Not-determined | Genome-fragment | NA              | 0     |       |
| S8_k141_140475 | 1364  | No  | NA | 0     | 0  | Not-determined | Genome-fragment | NA              | 0     |       |
| S8_k141_140475 | 21609 | Yes | NA | 12280 | 5  | 9              | Low-quality     | Genome-fragment | 14.79 | 43.17 |
| S8_k141_140475 | 21617 | Yes | NA | 16195 | 3  | 3              | Low-quality     | Genome-fragment | 30.96 | 25.08 |
| S8_k141_140475 | 1016  | No  | NA | 0     | 1  | Not-determined | Genome-fragment | NA              | 0     |       |
| S8_k141_140475 | 5189  | No  | NA | 0     | 1  | Not-determined | Genome-fragment | NA              | 0     |       |
| S8_k141_140475 | 3666  | No  | NA | 0     | 0  | Not-determined | Genome-fragment | NA              | 0     |       |
| S8_k141_140475 | 1712  | No  | NA | 0     | 2  | Not-determined | Genome-fragment | NA              | 0     |       |
| S8_k141_140475 | 1142  | No  | NA | 0     | 1  | Not-d          |                 |                 |       |       |



|                                                 |       |     |    |       |    |    |                |                   |    |       |       |
|-------------------------------------------------|-------|-----|----|-------|----|----|----------------|-------------------|----|-------|-------|
| S8_k141_13591                                   | 1370  | No  | NA | 0     | 0  | 1  | Not-determined | Genome-fragment   | NA | 0     | 0     |
| S9-final-viral-combined_k141_102994  O_partial  | 22007 | Yes |    | 10735 | 4  | 6  | Low-quality    | Genome-fragment   | NA | 13.66 | 51.22 |
| S8_k141_187205                                  | 3441  | No  | NA | 0     | 0  | 3  | Not-determined | Genome-fragment   | NA | 0     | 0     |
| S9-final-viral-combined_k141_28998  Full        | 22063 | Yes |    | 13623 | 6  | 3  | Low-quality    | Genome-fragment   | NA | 24.64 | 38.25 |
| S1-final-viral-combined_k141_31949  O_partial   | 22074 | No  | NA | 0     | 1  | 4  | Low-quality    | Genome-fragment   | NA | 17.66 | 0     |
| S8_k141_152825                                  | 1809  | No  | NA | 0     | 0  | 0  | Not-determined | Genome-fragment   | NA | 0     | 0     |
| S12-final-viral-combined_k141_203191  Full      | 22108 | No  | NA | 0     | 4  | 1  | Low-quality    | Genome-fragment   | NA | 28.18 | 0     |
| S8_k141_26095                                   | 3868  | No  | NA | 0     | 0  | 1  | Not-determined | Genome-fragment   | NA | 0     | 0     |
| S8_k141_171762                                  | 2400  | No  | NA | 0     | 0  | 0  | Not-determined | Genome-fragment   | NA | 0     | 0     |
| S8_k141_198502                                  | 1150  | No  | NA | 0     | 0  | 0  | Not-determined | Genome-fragment   | NA | 0     | 0     |
| S6-final-viral-combined_k141_35594  O_partial   | 22136 | Yes |    | 8301  | 3  | 8  | Low-quality    | Genome-fragment   | NA | 15.8  | 62.5  |
| S8_k141_198514                                  | 1004  | No  | NA | 0     | 0  | 0  | Not-determined | Genome-fragment   | NA | 0     | 0     |
| S8_k141_152831                                  | 28619 | No  | NA | 0     | 16 | 0  | Medium-quality | Genome-fragment   | NA | 52.11 | 0     |
| S8-final-viral-combined_k141_4771  Full         | 22146 | Yes |    | 13063 | 5  | 5  | Low-quality    | Genome-fragment   | NA | 29.13 | 41.01 |
| S8_k141_95287                                   | 1013  | No  | NA | 0     | 0  | 1  | Not-determined | Genome-fragment   | NA | 0     | 0     |
| S8_k141_267465                                  | 1041  | No  | NA | 0     | 0  | 1  | Not-determined | Genome-fragment   | NA | 0     | 0     |
| S1-final-viral-combined_k141_149201  Full       | 22148 | No  | NA | 0     | 8  | 0  | Low-quality    | Genome-fragment   | NA | 45.69 | 0     |
| S8_k141_95328                                   | 1048  | No  | NA | 0     | 0  | 2  | Not-determined | Genome-fragment   | NA | 18.59 | 0     |
| S12_k141_327700                                 | 22151 | No  | NA | 0     | 1  | 0  | Low-quality    | Genome-fragment   | NA | 41.12 | 0     |
| S5-final-viral-combined_k141_99254  O_partial   | 22325 | No  | NA | 0     | 2  | 10 | Low-quality    | Genome-fragment   | NA | 0     | 0     |
| S8_k141_129573                                  | 1457  | No  | NA | 0     | 0  | 1  | Not-determined | Genome-fragment   | NA | 0     | 0     |
| S8_k141_129577                                  | 1229  | No  | NA | 0     | 0  | 0  | Not-determined | Genome-fragment   | NA | 0     | 0     |
| S8_k141_72445                                   | 1572  | No  | NA | 0     | 0  | 2  | Not-determined | Genome-fragment   | NA | 0     | 0     |
| S8_k141_255909                                  | 1359  | No  | NA | 0     | 0  | 2  | Not-determined | Genome-fragment   | NA | 0     | 0     |
| S8_k141_221337                                  | 5766  | No  | NA | 0     | 0  | 4  | Not-determined | Genome-fragment   | NA | 0     | 0     |
| S8_k141_163972                                  | 2171  | No  | NA | 0     | 0  | 1  | Not-determined | Genome-fragment   | NA | 0     | 0     |
| S5-final-viral-combined_k141_205305  Full       | 22331 | No  | NA | 0     | 1  | 4  | Low-quality    | Genome-fragment   | NA | 49.51 | 0     |
| S11-final-viral-combined_k141_178671  Full      | 22337 | No  | NA | 0     | 17 | 0  | Low-quality    | Genome-fragment   | NA | 47.23 | 0     |
| S8_k141_141657                                  | 7648  | No  | NA | 0     | 0  | 5  | Not-determined | Genome-fragment   | NA | 0     | 0     |
| S8_k141_198609                                  | 4264  | No  | NA | 0     | 0  | 3  | Not-determined | Genome-fragment   | NA | 0     | 0     |
| S8_k141_164050                                  | 1597  | No  | NA | 0     | 0  | 1  | Not-determined | Genome-fragment   | NA | 0     | 0     |
| S8-final-viral-combined_k141_164670  Full       | 22418 | No  | NA | 0     | 1  | 7  | Low-quality    | Genome-fragment   | NA | 25.18 | 0     |
| S8_k141_233677                                  | 2009  | No  | NA | 0     | 0  | 0  | Not-determined | Genome-fragment   | NA | 0     | 0     |
| S7-final-viral-combined_k141_102731  O_partial  | 22476 | Yes |    | 15049 | 3  | 8  | Low-quality    | Genome-fragment   | NA | 28.64 | 33.04 |
| S8_k141_129645                                  | 1005  | No  | NA | 0     | 0  | 1  | Not-determined | Genome-fragment   | NA | 0     | 0     |
| S2_k141_5010                                    | 22479 | No  | NA | 0     | 10 | 10 | Low-quality    | Genome-fragment   | NA | 16.48 | 0     |
| S8_k141_141746                                  | 1662  | No  | NA | 0     | 0  | 1  | Not-determined | Genome-fragment   | NA | 0     | 0     |
| S8_k141_48747                                   | 1117  | No  | NA | 0     | 0  | 1  | Not-determined | Genome-fragment   | NA | 0     | 0     |
| S8_k141_106205                                  | 3110  | No  | NA | 0     | 0  | 2  | Not-determined | Genome-fragment   | NA | 0     | 0     |
| S8_k141_256033                                  | 1455  | No  | NA | 0     | 0  | 0  | Not-determined | Genome-fragment   | NA | 0     | 0     |
| S8_k141_26324                                   | 3142  | No  | NA | 0     | 0  | 1  | Not-determined | Genome-fragment   | NA | 0     | 0     |
| S2-final-viral-combined_k141_213786  O_partial  | 22506 | No  | NA | 0     | 1  | 5  | Low-quality    | Genome-fragment   | NA | 9.46  | 0     |
| S8_k141_210448                                  | 1022  | No  | NA | 0     | 0  | 1  | Not-determined | Genome-fragment   | NA | 0     | 0     |
| S8_k141_198735                                  | 1273  | No  | NA | 0     | 0  | 0  | Not-determined | Genome-fragment   | NA | 0     | 0     |
| S7-final-viral-combined_k141_21929  Full        | 22538 | Yes |    | 10170 | 5  | 6  | Low-quality    | Genome-fragment   | NA | 27.71 | 54.88 |
| S9-final-viral-combined_k141_97514  Full        | 22551 | Yes |    | 12485 | 3  | 2  | Low-quality    | Genome-fragment   | NA | 18.35 | 44.64 |
| S5-final-viral-combined_k141_91926  O_partial   | 22574 | No  | NA | 0     | 2  | 8  | Low-quality    | Genome-fragment   | NA | 35.6  | 0     |
| S8_k141_267929                                  | 3256  | No  | NA | 0     | 0  | 0  | Not-determined | Genome-fragment   | NA | 0     | 0     |
| S8_k141_37501                                   | 1609  | No  | NA | 0     | 0  | 2  | Not-determined | Genome-fragment   | NA | 0     | 0     |
| S12_k141_262219                                 | 22582 | Yes |    | 18730 | 2  | 3  | Low-quality    | Genome-fragment   | NA | 12.79 | 17.06 |
| S8_k141_72721                                   | 1702  | No  | NA | 0     | 0  | 1  | Not-determined | Genome-fragment   | NA | 0     | 0     |
| S8_k141_129794                                  | 2217  | No  | NA | 0     | 0  | 0  | Not-determined | Genome-fragment   | NA | 0     | 0     |
| S8_k141_164211                                  | 3556  | No  | NA | 0     | 0  | 2  | Not-determined | Genome-fragment   | NA | 0     | 0     |
| S8_k141_118052                                  | 3467  | No  | NA | 0     | 0  | 1  | Not-determined | Genome-fragment   | NA | 0     | 0     |
| S17-final-viral-combined_k141_127905  Full      | 22583 | Yes |    | 5975  | 3  | 10 | Low-quality    | Genome-fragment   | NA | 13.82 | 73.54 |
| S8_k141_245320                                  | 5568  | No  | NA | 0     | 0  | 1  | Not-determined | Genome-fragment   | NA | 0     | 0     |
| S11-final-viral-combined_k141_108043  Full      | 22602 | No  | NA | 0     | 4  | 0  | Low-quality    | Genome-fragment   | NA | 32.68 | 0     |
| S1-final-viral-combined_k141_28120  Full        | 22620 | No  | NA | 0     | 1  | 5  | Low-quality    | Genome-fragment   | NA | 26.65 | 0     |
| S8_k141_48868                                   | 9355  | No  | NA | 0     | 0  | 4  | Not-determined | Genome-fragment   | NA | 0     | 0     |
| S5-final-viral-combined_k141_180367  O_partial  | 22680 | Yes |    | 14516 | 6  | 6  | Low-quality    | Genome-fragment   | NA | 19.53 | 36    |
| S8_k141_245360                                  | 1198  | No  | NA | 0     | 0  | 1  | Not-determined | Genome-fragment   | NA | 0     | 0     |
| S8_k141_83275                                   | 1978  | No  | NA | 0     | 0  | 2  | Not-determined | Genome-fragment   | NA | 0     | 0     |
| S8_k141_106339                                  | 2728  | No  | NA | 0     | 0  | 3  | Not-determined | Genome-fragment   | NA | 0     | 0     |
| S8_k141_141950                                  | 1375  | No  | NA | 0     | 0  | 1  | Not-determined | Genome-fragment   | NA | 0     | 0     |
| S8_k141_26403                                   | 3265  | No  | NA | 0     | 0  | 2  | Not-determined | Genome-fragment   | NA | 0     | 0     |
| S8_k141_37648                                   | 3999  | No  | NA | 0     | 0  | 0  | Not-determined | Genome-fragment   | NA | 0     | 0     |
| S17-final-viral-combined_k141_202941  Full      | 22685 | Yes |    | 16772 | 4  | 5  | Low-quality    | Genome-fragment   | NA | 38    | 26.07 |
| S8_k141_129931                                  | 1076  | No  | NA | 0     | 0  | 2  | Not-determined | Genome-fragment   | NA | 16.95 | 41.65 |
| S12-final-viral-combined_k141_34886  O_partial  | 22706 | Yes |    | 12794 | 0  | 7  | Low-quality    | Genome-fragment   | NA | 0     | 0     |
| S8_k141_72850                                   | 3388  | No  | NA | 0     | 0  | 2  | Not-determined | Genome-fragment   | NA | 0     | 0     |
| S8_k141_245409                                  | 7401  | No  | NA | 0     | 0  | 2  | Not-determined | Genome-fragment   | NA | 11.04 | 0     |
| S2-final-viral-combined_k141_59390  Full        | 22712 | No  | NA | 0     | 0  | 8  | Low-quality    | Genome-fragment   | NA | 20.7  | 0     |
| S1-final-viral-combined_k141_127310  O_partial  | 22732 | No  | NA | 0     | 1  | 9  | Low-quality    | Genome-fragment   | NA | 0     | 0     |
| S8_k141_268091                                  | 1200  | No  | NA | 0     | 0  | 0  | Not-determined | Genome-fragment   | NA | 0     | 0     |
| S8_k141_187596                                  | 2400  | No  | NA | 0     | 0  | 1  | Not-determined | Genome-fragment   | NA | 0     | 0     |
| S8_k141_72879                                   | 3698  | No  | NA | 0     | 0  | 0  | Not-determined | Genome-fragment   | NA | 0     | 0     |
| S8_k141_48935                                   | 58944 | Yes |    | 50535 | 19 | 4  | High-quality   | High-quality      | NA | 100   | 14.27 |
| S8_k141_164381                                  | 1195  | No  | NA | 0     | 0  | 1  | Not-determined | Genome-fragment   | NA | 0     | 0     |
| S8_k141_268114                                  | 9504  | No  | NA | 0     | 0  | 5  | Not-determined | Genome-fragment   | NA | 0     | 0     |
| S8-final-viral-combined_k141_163586  O_partial  | 22732 | Yes |    | 13507 | 3  | 7  | Low-quality    | Genome-fragment   | NA | 13.91 | 40.58 |
| S8_k141_95661                                   | 1332  | No  | NA | 0     | 0  | 1  | Not-determined | Genome-fragment   | NA | 0     | 0     |
| S8_k141_210591                                  | 1574  | No  | NA | 0     | 0  | 1  | Not-determined | Genome-fragment   | NA | 0     | 0     |
| S11-final-viral-combined_k141_295134  O_partial | 22733 | Yes |    | 14917 | 3  | 8  | Low-quality    | Genome-fragment   | NA | 35.95 | 34.38 |
| S8_k141_176563                                  | 1168  | No  | NA | 0     | 0  | 1  | Not-determined | Genome-fragment   | NA | 0     | 0     |
| S8_k141_268128                                  | 3301  | No  | NA | 0     | 0  | 1  | Not-determined | Genome-fragment   | NA | 0     | 0     |
| S8_k141_26584                                   | 1074  | No  | NA | 0     | 0  | 0  | Not-determined | Genome-fragment   | NA | 0     | 0     |
| S8_k141_48987                                   | 1231  | No  | NA | 0     | 0  | 0  | Not-determined | Genome-fragment   | NA | 0     | 0     |
| S8_k141_187688                                  | 3141  | No  | NA | 0     | 0  | 0  | Not-determined | Genome-fragment   | NA | 0     | 0     |
| S1-final-viral-combined_k141_198056  Full       | 22753 | No  | NA | 0     | 1  | 15 | Low-quality    | Genome-fragment   | NA | 42.59 | 0     |
| S8_k141_118288                                  | 1558  | No  | NA | 0     | 0  | 0  | Not-determined | Genome-fragment   | NA | 0     | 0     |
| S8_k141_106526                                  | 3290  | No  | NA | 0     | 0  | 1  | Not-determined | Genome-fragment   | NA | 0     | 0     |
| S8_k141_245461                                  | 1873  | No  | NA | 0     | 0  | 1  | Not-determined | Genome-fragment   | NA | 0     | 0     |
| S8_k141_153214                                  | 1107  | No  | NA | 0     | 0  | 1  | Not-determined | Genome-fragment   | NA | 0     | 0     |
| S6-final-viral-combined_k141_34613  O_partial   | 22747 | No  | NA | 0     | 2  | 10 | Low-quality    | Genome-fragment   | NA | 9.68  | 0     |
| S8_k141_106557                                  | 1106  | No  | NA | 0     | 0  | 0  | Not-determined | Genome-fragment   | NA | 0     | 0     |
| S8_k141_49036                                   | 1739  | No  | NA | 0     | 0  | 1  | Not-determined | Genome-fragment   | NA | 0     | 0     |
| S1-final-viral-combined_k141_379439  Full       | 22753 | No  | NA | 0     | 10 | 0  | Low-quality    | Genome-fragment   | NA | 39.03 | 0     |
| S8_k141_187721                                  | 4140  | No  | NA | 0     | 0  | 1  | Not-determined | Genome-fragment   | NA | 0     | 0     |
| S8_k141_176687                                  | 7659  | No  | NA | 0     | 0  | 1  | Not-determined | Genome-fragment   | NA | 0     | 0     |
| S8_k141_245524                                  | 2756  | No  | NA | 0     | 0  | 2  | Not-determined | Genome-fragment   | NA | 0     | 0     |
| S8_k141_210560                                  | 1967  | No  | NA | 0     | 0  | 3  | Not-determined | Genome-fragment   | NA | 0     | 0     |
| S8_k141_141124                                  | 7600  | No  | NA | 0     | 0  | 2  | Not-determined | Genome-fragment   | NA | 0     | 0     |
| S8_k141_130171                                  | 1368  | No  | NA | 0     | 0  | 1  | Not-determined | Genome-fragment   | NA | 0     | 0     |
| S8_k141_234115                                  | 3069  | No  | NA | 0     | 0  | 1  | Not-determined | Genome-fragment   | NA | 0     | 0     |
| S8_k141_73082                                   | 1097  | No  | NA | 0     | 0  | 0  | Not-determined | Genome-fragment   | NA | 0     | 0     |
| S8_k141_187837                                  | 1236  | No  | NA | 0     | 0  | 0  | Not-determined | Genome-fragment   | NA | 0     | 0     |
| S8_k141_130243                                  | 1076  | No  | NA | 0     | 0  | 2  | Not-determined | Genome-fragment   | NA | 0     | 0     |
| S8_k141_164549                                  | 1177  | No  | NA | 0     | 0  | 1  | Not-determined | Genome-fragment   | NA | 0     | 0     |
| S8_k141_106681                                  | 1483  | No  | NA | 0     | 0  | 0  | Not-determined | Genome-fragment   | NA | 0     | 0     |
| S8_k141_210729                                  | 2540  | No  | NA | 0     | 0  | 0  | Not-determined | Genome-fragment   | NA | 0     | 0     |
| S8_k141_245399                                  | 9351  | No  | NA | 0     | 0  | 6  | Not-determined | Genome-fragment   | NA | 0     | 0     |
| S8_k141_199042                                  | 1055  | No  | NA | 0     | 0  | 1  | Not-determined | Genome-fragment   | NA | 0     | 0     |
| S8_k141_73100                                   | 1486  | No  | NA | 0     | 0  | 1  | Not-determined | Genome-fragment   | NA | 0     | 0     |
| S2-final-viral-combined_k141_168785  Full       | 22764 | Yes |    | 18068 | 2  | 3  | Low-quality    | Genome-fragment   | NA | 35.52 | 20.63 |
| S8_k141_106704                                  | 1024  | No  | NA | 0     | 0  | 1  | Not-determined | Genome-fragment   | NA | 0     | 0     |
| S8_k141_83525                                   | 2140  | No  | NA | 0     | 0  | 0  | Not-determined | Genome-fragment   | NA | 0     | 0     |
| S8_k141_83532                                   | 1546  | No  | NA | 0     | 0  | 1  | Not-determined | Genome-fragment   | NA | 0     | 0     |
| S8_k141_187935                                  | 2802  | No  | NA | 0     | 0  | 2  | Not-determined | Genome-fragment   | NA | 0     | 0     |
| S4-final-viral-combined_k141_162311  Full       | 22767 | No  | NA | 0     | 1  | 1  | Low-quality    | Genome-fragment   | NA | 12.35 | 0     |
| S8_k141_26780                                   | 2054  | No  | NA | 0     | 0  | 1  | Not-determined | Genome-fragment   | NA | 0     | 0     |
| S8_k141_2250                                    | 1107  | No  | NA | 0     | 0  | 1  | Not-determined | Genome-fragment   | NA | 0     | 0     |
| S8_k141_143121                                  | 3152  | No  | NA | 0     | 0  | 1  | Not-determined | Genome-fragment   | NA | 0     | 0     |
| S12-final-viral-combined_k141_310910  O_partial | 22812 | Yes |    | 16009 | 5  | 3  | Low-quality    | Genome-fragment   | NA | 38.49 | 29.82 |
| S8_k141_245712                                  | 3339  | No  | NA | 0     | 0  | 1  | Not-determined | Genome-fragment   | NA | 0     | 0     |
| S6-final-viral-combined_k141_3948  Full         | 22831 | No  | NA | 0     | 8  | 0  | Low-quality    | Genome-fragment</ |    |       |       |



|                                                 |       |     |    |       |    |                |                 |                 |       |
|-------------------------------------------------|-------|-----|----|-------|----|----------------|-----------------|-----------------|-------|
| S8_k141_142570                                  | 1112  | No  | NA | 0     | 1  | Not-determined | Genome-fragment | NA              | 0     |
| S8_k141_142580                                  | 1176  | No  | NA | 0     | 1  | Not-determined | Genome-fragment | NA              | 0     |
| S8_k141_177725                                  | 1062  | No  | NA | 0     | 2  | Not-determined | Genome-fragment | NA              | 0     |
| S8_k141_246060                                  | 1202  | No  | NA | 0     | 1  | Not-determined | Genome-fragment | NA              | 0     |
| S6_k141_74427                                   | 23142 | No  | NA | 5     | 1  | Low-quality    | Genome-fragment | NA              | 12.37 |
| S8_k141_38816                                   | 3097  | No  | NA | 0     | 1  | Not-determined | Genome-fragment | NA              | 0     |
| S8_k141_142586                                  | 1407  | No  | NA | 0     | 1  | Not-determined | Genome-fragment | NA              | 0     |
| S8_k141_142593                                  | 8302  | No  | NA | 0     | 2  | Not-determined | Genome-fragment | NA              | 0     |
| S12-final-viral-combined_k141_71200  full       | 23159 | No  | NA | 1     | 1  | Low-quality    | Genome-fragment | NA              | 13.71 |
| S2-final-viral-combined_k141_118728  full       | 23266 | No  | NA | 16    | 1  | Low-quality    | Genome-fragment | NA              | 49.3  |
| S8_k141_142618                                  | 1377  | No  | NA | 0     | 1  | Not-determined | Genome-fragment | NA              | 0     |
| S8_k141_199318                                  | 2234  | No  | NA | 0     | 0  | Not-determined | Genome-fragment | NA              | 0     |
| S8_k141_118897                                  | 1166  | No  | NA | 0     | 1  | Not-determined | Genome-fragment | NA              | 0     |
| S8_k141_199344                                  | 1102  | No  | NA | 0     | 0  | Not-determined | Genome-fragment | NA              | 0     |
| S8_k141_61403                                   | 9828  | No  | NA | 0     | 6  | Not-determined | Genome-fragment | NA              | 0     |
| S8_k141_165044                                  | 1300  | No  | NA | 0     | 0  | Not-determined | Genome-fragment | NA              | 0     |
| S8_k141_188278                                  | 6243  | No  | NA | 0     | 3  | Not-determined | Genome-fragment | NA              | 0     |
| S8_k141_177367                                  | 1522  | No  | NA | 0     | 1  | Not-determined | Genome-fragment | NA              | 0     |
| S8_k141_234625                                  | 4761  | No  | NA | 0     | 3  | Not-determined | Genome-fragment | NA              | 0     |
| S8_k141_38359                                   | 3646  | No  | NA | 0     | 0  | Not-determined | Genome-fragment | NA              | 0     |
| S8_k141_222474                                  | 1813  | No  | NA | 0     | 0  | Not-determined | Genome-fragment | NA              | 0     |
| S8_k141_188301                                  | 1246  | No  | NA | 0     | 1  | Not-determined | Genome-fragment | NA              | 0     |
| S8_k141_199396                                  | 2754  | No  | NA | 0     | 1  | Not-determined | Genome-fragment | NA              | 0     |
| S8_k141_268790                                  | 5991  | No  | NA | 0     | 3  | Not-determined | Genome-fragment | NA              | 0     |
| S5-final-viral-combined_k141_15798  0_partial   | 22773 | Yes | NA | 12459 | 5  | 6              | Low-quality     | Genome-fragment | 16.93 |
| S8_k141_115001                                  | 4158  | No  | NA | 0     | 2  | Not-determined | Genome-fragment | NA              | 46.47 |
| S8_k141_115008                                  | 1736  | No  | NA | 0     | 2  | Not-determined | Genome-fragment | NA              | 0     |
| S8_k141_268821                                  | 1060  | No  | NA | 0     | 0  | Not-determined | Genome-fragment | NA              | 0     |
| S12-final-viral-combined_k141_270292  full      | 23318 | Yes | NA | 19063 | 0  | 4              | Low-quality     | Genome-fragment | 37.17 |
| S8_k141_199449                                  | 1193  | No  | NA | 2     | 2  | Not-determined | Genome-fragment | NA              | 18.39 |
| S8_k141_38447                                   | 3186  | No  | NA | 0     | 1  | Not-determined | Genome-fragment | NA              | 0     |
| S8_k141_199467                                  | 1086  | No  | NA | 0     | 1  | Not-determined | Genome-fragment | NA              | 0     |
| S8_k141_222581                                  | 1281  | No  | NA | 0     | 0  | Not-determined | Genome-fragment | NA              | 0     |
| S8_k141_38486                                   | 1323  | No  | NA | 0     | 0  | Not-determined | Genome-fragment | NA              | 0     |
| S8_k141_38493                                   | 2718  | No  | NA | 0     | 1  | Not-determined | Genome-fragment | NA              | 0     |
| S8_k141_256665                                  | 2512  | No  | NA | 0     | 1  | Not-determined | Genome-fragment | NA              | 0     |
| S8_k141_199503                                  | 1847  | No  | NA | 0     | 2  | Not-determined | Genome-fragment | NA              | 0     |
| S8_k141_222642                                  | 1059  | No  | NA | 0     | 2  | Not-determined | Genome-fragment | NA              | 0     |
| S8_k141_130819                                  | 3089  | No  | NA | 0     | 0  | Not-determined | Genome-fragment | NA              | 0     |
| S8_k141_153892                                  | 1416  | No  | NA | 0     | 0  | Not-determined | Genome-fragment | NA              | 0     |
| S8_k141_211345                                  | 1269  | No  | NA | 0     | 0  | Not-determined | Genome-fragment | NA              | 0     |
| S8_k141_73519                                   | 1302  | No  | NA | 0     | 1  | Not-determined | Genome-fragment | NA              | 0     |
| S8_k141_211362                                  | 2022  | No  | NA | 0     | 2  | Not-determined | Genome-fragment | NA              | 0     |
| S11-final-viral-combined_k141_206634  full      | 23375 | Yes | NA | 12283 | 4  | 9              | Low-quality     | Genome-fragment | 14.15 |
| S8_k141_27438                                   | 1079  | No  | NA | 0     | 1  | Not-determined | Genome-fragment | NA              | 47.45 |
| S8_k141_268951                                  | 3359  | No  | NA | 0     | 1  | Not-determined | Genome-fragment | NA              | 0     |
| S8_k141_27443                                   | 1572  | No  | NA | 0     | 1  | Not-determined | Genome-fragment | NA              | 0     |
| S7-final-viral-combined_k141_157811  full       | 23381 | Yes | NA | 14932 | 9  | 2              | Low-quality     | Genome-fragment | 31.16 |
| S8_k141_130885                                  | 1047  | No  | NA | 0     | 1  | Not-determined | Genome-fragment | NA              | 36.14 |
| S8_k141_222720                                  | 2079  | No  | NA | 0     | 1  | Not-determined | Genome-fragment | NA              | 0     |
| S8-final-viral-combined_k141_144651  0_partial  | 23411 | Yes | NA | 13327 | 4  | 8              | Low-quality     | Genome-fragment | 33.83 |
| S12_k141_295744                                 | 23441 | No  | NA | 0     | 4  | Low-quality    | Genome-fragment | NA              | 10.78 |
| S1-final-viral-combined_k141_106283  full       | 23459 | Yes | NA | 16096 | 7  | 8              | Low-quality     | Genome-fragment | 29.44 |
| S8_k141_165358                                  | 1089  | No  | NA | 0     | 1  | Not-determined | Genome-fragment | NA              | 31.39 |
| S8_k141_165363                                  | 1157  | No  | NA | 0     | 1  | Not-determined | Genome-fragment | NA              | 0     |
| S5-final-viral-combined_k141_98307  0_partial   | 23489 | Yes | NA | 12656 | 4  | 10             | Low-quality     | Genome-fragment | 12.5  |
| S8_k141_234868                                  | 1049  | No  | NA | 0     | 1  | Not-determined | Genome-fragment | NA              | 46.12 |
| S8_k141_165383                                  | 1136  | No  | NA | 0     | 0  | Not-determined | Genome-fragment | NA              | 0     |
| S8_k141_199557                                  | 1377  | No  | NA | 0     | 2  | Not-determined | Genome-fragment | NA              | 0     |
| S8_k141_48887                                   | 1649  | No  | NA | 0     | 0  | Not-determined | Genome-fragment | NA              | 0     |
| S8_k141_199568                                  | 3898  | No  | NA | 0     | 1  | Not-determined | Genome-fragment | NA              | 0     |
| S8_k141_256703                                  | 1704  | No  | NA | 0     | 1  | Not-determined | Genome-fragment | NA              | 0     |
| S8_k141_84238                                   | 3469  | No  | NA | 0     | 0  | Not-determined | Genome-fragment | NA              | 0     |
| S8_k141_269120                                  | 1198  | No  | NA | 0     | 1  | Not-determined | Genome-fragment | NA              | 0     |
| S8_k141_61717                                   | 2935  | No  | NA | 0     | 1  | Not-determined | Genome-fragment | NA              | 0     |
| S8_k141_269132                                  | 1574  | No  | NA | 0     | 1  | Not-determined | Genome-fragment | NA              | 0     |
| S8_k141_177638                                  | 1712  | No  | NA | 0     | 1  | Not-determined | Genome-fragment | NA              | 0     |
| S8_k141_61771                                   | 1012  | No  | NA | 0     | 1  | Not-determined | Genome-fragment | NA              | 0     |
| S8-final-viral-combined_k141_161901  full       | 23490 | No  | NA | 7     | 1  | Low-quality    | Genome-fragment | NA              | 49.63 |
| S8_k141_188641                                  | 1370  | No  | NA | 0     | 0  | Not-determined | Genome-fragment | NA              | 0     |
| S7-final-viral-combined_k141_152511  full       | 23519 | No  | NA | 1     | 10 | Low-quality    | Genome-fragment | NA              | 26.4  |
| S8_k141_177681                                  | 1075  | No  | NA | 0     | 0  | Not-determined | Genome-fragment | NA              | 0     |
| S8_k141_222919                                  | 1231  | No  | NA | 0     | 0  | Not-determined | Genome-fragment | NA              | 0     |
| S8_k141_96591                                   | 1454  | No  | NA | 0     | 1  | Not-determined | Genome-fragment | NA              | 0     |
| S8_k141_24817                                   | 3040  | No  | NA | 0     | 2  | Not-determined | Genome-fragment | NA              | 0     |
| S8_k141_38814                                   | 1103  | No  | NA | 0     | 0  | Not-determined | Genome-fragment | NA              | 0     |
| S17-final-viral-combined_k141_150874  full      | 23534 | Yes | NA | 10890 | 7  | 8              | Low-quality     | Genome-fragment | 20.68 |
| S8_k141_107358                                  | 1283  | No  | NA | 0     | 1  | Not-determined | Genome-fragment | NA              | 53.73 |
| S8_k141_146029                                  | 9683  | No  | NA | 0     | 1  | Not-determined | Genome-fragment | NA              | 0     |
| S8_k141_115273                                  | 3087  | No  | NA | 0     | 0  | Not-determined | Genome-fragment | NA              | 0     |
| S12-final-viral-combined_k141_153404  full      | 23559 | Yes | NA | 14541 | 15 | 4              | Low-quality     | Genome-fragment | 41.72 |
| S8_k141_151504                                  | 2047  | No  | NA | 0     | 0  | Not-determined | Genome-fragment | NA              | 38.28 |
| S8_k141_234978                                  | 1409  | No  | NA | 0     | 1  | Not-determined | Genome-fragment | NA              | 0     |
| S8_k141_211645                                  | 1049  | No  | NA | 0     | 0  | Not-determined | Genome-fragment | NA              | 0     |
| S8_k141_131148                                  | 1280  | No  | NA | 0     | 1  | Not-determined | Genome-fragment | NA              | 0     |
| S8_k141_38900                                   | 1054  | No  | NA | 0     | 0  | Not-determined | Genome-fragment | NA              | 0     |
| S8_k141_235055                                  | 1429  | No  | NA | 0     | 2  | Not-determined | Genome-fragment | NA              | 0     |
| S8_k141_188820                                  | 1185  | No  | NA | 0     | 0  | Not-determined | Genome-fragment | NA              | 0     |
| S8_k141_246348                                  | 1768  | No  | NA | 0     | 1  | Not-determined | Genome-fragment | NA              | 0     |
| S8_k141_269243                                  | 5047  | No  | NA | 0     | 0  | Not-determined | Genome-fragment | NA              | 0     |
| S7-final-viral-combined_k141_138418  full       | 23668 | No  | NA | 11    | 0  | Low-quality    | Genome-fragment | NA              | 36.73 |
| S8_k141_3983                                    | 1112  | No  | NA | 0     | 1  | Not-determined | Genome-fragment | NA              | 0     |
| S8_k141_256880                                  | 2569  | No  | NA | 0     | 1  | Not-determined | Genome-fragment | NA              | 0     |
| S8_k141_131204                                  | 1216  | No  | NA | 0     | 1  | Not-determined | Genome-fragment | NA              | 0     |
| S8_k141_269303                                  | 2063  | No  | NA | 0     | 1  | Not-determined | Genome-fragment | NA              | 0     |
| S5-final-viral-combined_k141_144698  0_partial  | 23714 | No  | NA | 1     | 8  | Low-quality    | Genome-fragment | NA              | 40.74 |
| S1-final-viral-combined_k141_95394  0_partial   | 23717 | Yes | NA | 14899 | 3  | 9              | Low-quality     | Genome-fragment | 36.76 |
| S4-final-viral-combined_k141_102196  full       | 23888 | No  | NA | 0     | 12 | Low-quality    | Genome-fragment | NA              | 36.8  |
| S8_k141_269120                                  | 3006  | No  | NA | 0     | 1  | Not-determined | Genome-fragment | NA              | 9.29  |
| S8_k141_143075                                  | 1561  | No  | NA | 0     | 1  | Not-determined | Genome-fragment | NA              | 0     |
| S8_k141_131240                                  | 1863  | No  | NA | 0     | 1  | Not-determined | Genome-fragment | NA              | 0     |
| S8_k141_131242                                  | 1212  | No  | NA | 0     | 1  | Not-determined | Genome-fragment | NA              | 0     |
| S9-final-viral-combined_k141_15741  0_partial   | 23889 | No  | NA | 0     | 17 | Low-quality    | Genome-fragment | NA              | 22.13 |
| S8_k141_269347                                  | 1705  | No  | NA | 0     | 1  | Not-determined | Genome-fragment | NA              | 0     |
| S8_k141_39075                                   | 1212  | No  | NA | 0     | 1  | Not-determined | Genome-fragment | NA              | 0     |
| S8_k141_246405                                  | 2477  | No  | NA | 0     | 1  | Not-determined | Genome-fragment | NA              | 0     |
| S8_k141_269377                                  | 1812  | No  | NA | 0     | 0  | Not-determined | Genome-fragment | NA              | 0     |
| S8_k141_256953                                  | 1427  | No  | NA | 0     | 2  | Not-determined | Genome-fragment | NA              | 0     |
| S8_k141_269400                                  | 1719  | No  | NA | 0     | 1  | Not-determined | Genome-fragment | NA              | 0     |
| S8_k141_62190                                   | 1524  | No  | NA | 0     | 1  | Not-determined | Genome-fragment | NA              | 0     |
| S8_k141_131332                                  | 1524  | No  | NA | 0     | 0  | Not-determined | Genome-fragment | NA              | 0     |
| S8_k141_115412                                  | 1329  | No  | NA | 0     | 1  | Not-determined | Genome-fragment | NA              | 0     |
| S8_k141_115424                                  | 1189  | No  | NA | 0     | 0  | Not-determined | Genome-fragment | NA              | 0     |
| S8_k141_222083                                  | 1108  | No  | NA | 0     | 2  | Not-determined | Genome-fragment | NA              | 0     |
| S8_k141_177943                                  | 1080  | No  | NA | 0     | 0  | Not-determined | Genome-fragment | NA              | 0     |
| S17-final-viral-combined_k141_178208  0_partial | 23942 | No  | NA | 2     | 3  | Low-quality    | Genome-fragment | NA              | 14.56 |
| S6-final-viral-combined_k141_107641  1_partial  | 24099 | Yes | NA | 21450 | 2  | 3              | Low-quality     | Genome-fragment | 27.64 |
| S8_k141_96811                                   | 1348  | No  | NA | 0     | 0  | Not-determined | Genome-fragment | NA              | 10.99 |
| S8_k141_188964                                  | 1060  | No  | NA | 0     | 1  | Not-determined | Genome-fragment | NA              | 0     |
| S8_k141_235210                                  | 1009  | No  | NA | 0     | 0  | Not-determined | Genome-fragment | NA              | 0     |
| S8_k141_73895                                   | 1951  | No  | NA | 0     | 0  | Not-determined | Genome-fragment | NA              | 0     |
| S4-final-viral-combined_k141_132997  full       | 24125 | No  | NA | 0     | 1  | Low-quality    | Genome-fragment | NA              | 47.52 |
| S8_k141_154399                                  | 1754  | No  | NA | 0     | 1  | Not-determined | Genome-fragment | NA              | 0     |
| S8_k141_96886                                   | 2105  | No  | NA | 0     | 1  | Not-determined | Genome-fragment | NA              | 0     |
| S8-final-viral-combined_k141_91209  full        | 24143 | Yes | NA | 12416 | 1  | 4              | Low-quality     | Genome-fragment | 16.66 |
| S7-final-viral-combined_k141_92909  0_partial   | 24164 | No  | NA | 0     | 12 | Low-quality    | Genome-fragment | NA              | 48.57 |
| S8_k141_269526                                  | 1181  | No  | NA | 0     | 2  | Not-determined | Genome-fragment | NA              | 32.92 |
| S8_k141_131428                                  | 1111  | No  | NA | 0     | 0  | Not-determined | Genome-fragment | NA              | 0     |
| S8_k141_154452                                  | 4807  | No  | NA | 0     | 0  | Not-determined | Genome-fragment | NA              | 0     |
| S8_k141_96968                                   | 1038  | No  | NA | 0     | 0  | Not-determined | Genome-fragment | NA              | 0     |
| S8_k141_84683                                   | 1026  | No  | NA | 0     | 1  | Not-determined | Genome-fragment | NA              | 0     |
| S8_k141_269572                                  | 1090  | No  | NA | 0     | 0  | Not-determined | Genome-fragment | NA              | 0     |
| S4_k141_44821                                   | 24205 | No  | NA | 3     | 1  | Low-quality    | Genome-fragment | NA              | 24.16 |
| S8_k141_235375                                  | 1165  | No  | NA | 0     | 1  | Not-determined | Genome-fragment | NA              | 0     |
| S8_k141_235380                                  | 1504  | No  | NA | 0     | 1  | Not-determined | Genome-fragment | NA              | 0     |
| S8_k141_211976                                  | 3286  | No  | NA | 0     | 3  | Not-determined | Genome-fragment | NA              | 0     |
| S8_k141_97025                                   | 3256  | No  | NA | 0     | 3  | Not-determined | Genome-fragment | NA              | 0     |
| S8_k141_131547                                  | 1176  | No  | NA | 0     | 2  | Not-determined | Genome-fragment | NA              | 0     |
| S8_k141_131553                                  | 1119  | No  | NA | 0     | 1  | Not-determined | Genome-fragment | NA              | 0     |
| S8_k141_62462                                   | 1308  | No  | NA | 0     | 1  | Not-determined | Genome-fragment | NA              | 0     |
| S8_k141_50398                                   | 1013  | No  | NA | 0     | 0  | Not-determined | Genome-fragment | NA              | 0     |
| S11-final-viral-combined_k141_4014  full        | 24247 | Yes | NA | 11713 | 2  | 6              | Low-quality     | Genome-fragment | 25.6  |
| S2-final-viral-combined_k141_114586  full       | 24253 | No  | NA | 1     | 3  | Low-quality    | Genome-fragment | NA              | 51.69 |
| S8_k141_84757                                   | 4359  | No  | NA | 0     | 1  | Not-determined | Genome-fragment | NA              | 38.7  |



|                                                 |       |     |    |       |    |                |                 |                 |       |       |
|-------------------------------------------------|-------|-----|----|-------|----|----------------|-----------------|-----------------|-------|-------|
| S8_k141_235680                                  | 1039  | No  | NA | 0     | 1  | Not-determined | Genome-fragment | NA              | 0     |       |
| S7-final-viral-combined_k141_228257  full       | 24639 | Yes |    | 2     | 1  | Low-quality    | Genome-fragment | 18.83           | 61.07 |       |
| S8_k141_246879                                  | 1041  | No  | NA | 0     | 1  | Not-determined | Genome-fragment | NA              | 0     |       |
| S8_k141_28078                                   | 4979  | No  | NA | 0     | 1  | Not-determined | Genome-fragment | NA              | 0     |       |
| S8_k141_166082                                  | 1521  | No  | NA | 0     | 1  | Not-determined | Genome-fragment | NA              | 0     |       |
| S8_k141_269917                                  | 4185  | No  | NA | 0     | 1  | Not-determined | Genome-fragment | NA              | 0     |       |
| S17-final-viral-combined_k141_158852  O_partial | 24690 | Yes |    | 4     | 5  | Low-quality    | Genome-fragment | 13.24           | 55.76 |       |
| S8_k141_246481                                  | 18213 | No  | NA | 0     | 14 | Not-determined | Genome-fragment | NA              | 0     |       |
| S8_k141_246496                                  | 1351  | No  | NA | 0     | 1  | Not-determined | Genome-fragment | NA              | 0     |       |
| S8_k141_143555                                  | 3096  | No  | NA | 0     | 1  | Not-determined | Genome-fragment | NA              | 0     |       |
| S8_k141_178526                                  | 1247  | No  | NA | 0     | 0  | Not-determined | Genome-fragment | NA              | 0     |       |
| S8_k141_74379                                   | 1317  | No  | NA | 0     | 0  | Not-determined | Genome-fragment | NA              | 0     |       |
| S8_k141_212334                                  | 1995  | No  | NA | 0     | 1  | Not-determined | Genome-fragment | NA              | 0     |       |
| S8_k141_74395                                   | 2196  | No  | NA | 0     | 0  | Not-determined | Genome-fragment | NA              | 0     |       |
| S8_k141_108303                                  | 1059  | No  | NA | 0     | 0  | Not-determined | Genome-fragment | NA              | 0     |       |
| S8_k141_50746                                   | 1111  | No  | NA | 0     | 1  | Not-determined | Genome-fragment | NA              | 0     |       |
| S8_k141_166182                                  | 1068  | No  | NA | 0     | 1  | Not-determined | Genome-fragment | NA              | 0     |       |
| S8_k141_189495                                  | 3359  | No  | NA | 0     | 0  | Not-determined | Genome-fragment | NA              | 0     |       |
| S8_k141_62892                                   | 1327  | No  | NA | 0     | 1  | Not-determined | Genome-fragment | NA              | 0     |       |
| S8-final-viral-combined_k141_188165  full       | 24794 | No  | NA | 1     | 19 | Low-quality    | Genome-fragment | 8.88            | 0     |       |
| S8_k141_62935                                   | 1837  | No  | NA | 0     | 0  | Not-determined | Genome-fragment | NA              | 0     |       |
| S8_k141_131859                                  | 1243  | No  | NA | 0     | 0  | Not-determined | Genome-fragment | NA              | 0     |       |
| S8_k141_257272                                  | 1048  | No  | NA | 0     | 0  | Not-determined | Genome-fragment | NA              | 0     |       |
| S8_k141_97265                                   | 1826  | No  | NA | 0     | 3  | Not-determined | Genome-fragment | NA              | 0     |       |
| S8_k141_62981                                   | 1696  | No  | NA | 0     | 1  | Not-determined | Genome-fragment | NA              | 0     |       |
| S9_k141_00841                                   | 24855 | Yes |    | 0     | 4  | Low-quality    | Genome-fragment | 25.65           | 42.29 |       |
| S8_k141_115960                                  | 5296  | No  | NA | 0     | 2  | Not-determined | Genome-fragment | NA              | 0     |       |
| S4-final-viral-combined_k141_80415  full        | 24876 | No  | NA | 10    | 0  | Low-quality    | Genome-fragment | 41.52           | 0     |       |
| S12-final-viral-combined_k141_394734  full      | 24916 | Yes |    | 3     | 2  | Low-quality    | Genome-fragment | 26.69           | 56.44 |       |
| S8_k141_247114                                  | 1493  | No  | NA | 0     | 1  | Not-determined | Genome-fragment | NA              | 0     |       |
| S2-final-viral-combined_k141_187023  O_partial  | 24939 | Yes |    | 20789 | 3  | 2              | Low-quality     | Genome-fragment | 48.01 | 16.64 |
| S4_k141_120656                                  | 24955 | No  | NA | 3     | 0  | Low-quality    | Genome-fragment | 37.1            | 0     |       |
| S8_k141_143637                                  | 2526  | No  | NA | 0     | 0  | Not-determined | Genome-fragment | NA              | 0     |       |
| S8_k141_178684                                  | 1120  | No  | NA | 0     | 1  | Not-determined | Genome-fragment | NA              | 0     |       |
| S8_k141_247140                                  | 5988  | No  | NA | 0     | 1  | Not-determined | Genome-fragment | NA              | 0     |       |
| S8_k141_155114                                  | 1283  | No  | NA | 0     | 1  | Not-determined | Genome-fragment | NA              | 0     |       |
| S1-final-viral-combined_k141_191441  full       | 25112 | No  | NA | 3     | 0  | Low-quality    | Genome-fragment | 39.78           | 0     |       |
| S8_k141_120016                                  | 1160  | No  | NA | 0     | 0  | Not-determined | Genome-fragment | NA              | 0     |       |
| S4-final-viral-combined_k141_511  full          | 25117 | Yes |    | 3     | 14 | Low-quality    | Genome-fragment | 11.57           | 71.76 |       |
| S2-final-viral-combined_k141_196261  O_partial  | 25211 | Yes |    | 9919  | 3  | 14             | Low-quality     | Genome-fragment | 15.35 | 60.66 |
| S11-final-viral-combined_k141_248571  O_partial | 25336 | Yes |    | 13668 | 3  | 5              | Low-quality     | Genome-fragment | 32.83 | 46.05 |
| S8_k141_121495                                  | 1099  | No  | NA | 0     | 0  | Not-determined | Genome-fragment | NA              | 0     |       |
| S8_k141_200059                                  | 1098  | No  | NA | 0     | 1  | Not-determined | Genome-fragment | NA              | 0     |       |
| S11-final-viral-combined_k141_229554  full      | 25355 | Yes |    | 9071  | 3  | 11             | Low-quality     | Genome-fragment | 8.17  | 64.22 |
| S9-final-viral-combined_k141_233510  O_partial  | 25360 | No  | NA | 3     | 8  | Low-quality    | Genome-fragment | 48.74           | 0     |       |
| S8_k141_132013                                  | 1020  | No  | NA | 0     | 1  | Not-determined | Genome-fragment | NA              | 0     |       |
| S8_k141_155041                                  | 1540  | No  | NA | 0     | 2  | Not-determined | Genome-fragment | NA              | 0     |       |
| S8_k141_74618                                   | 1249  | No  | NA | 0     | 0  | Not-determined | Genome-fragment | NA              | 0     |       |
| S11_k141_186395                                 | 25407 | No  | NA | 12    | 0  | Low-quality    | Genome-fragment | 39.89           | 0     |       |
| S8_k141_257458                                  | 1183  | No  | NA | 0     | 0  | Not-determined | Genome-fragment | NA              | 0     |       |
| S5-final-viral-combined_k141_42162  full        | 25450 | Yes |    | 10599 | 2  | 8              | Low-quality     | Genome-fragment | 8.23  | 58.35 |
| S8_k141_51041                                   | 1178  | No  | NA | 0     | 0  | Not-determined | Genome-fragment | NA              | 0     |       |
| S8_k141_74682                                   | 7254  | No  | NA | 0     | 3  | Not-determined | Genome-fragment | NA              | 0     |       |
| S2-final-viral-combined_k141_104574  full       | 25468 | No  | NA | 0     | 1  | Low-quality    | Genome-fragment | 24.35           | 0     |       |
| S8_k141_189722                                  | 1469  | No  | NA | 0     | 1  | Low-quality    | Genome-fragment | NA              | 0     |       |
| S11-final-viral-combined_k141_23572  O_partial  | 25474 | Yes |    | 13158 | 6  | 11             | Low-quality     | Genome-fragment | 17.83 | 48.35 |
| S8_k141_143929                                  | 1163  | No  | NA | 0     | 0  | Not-determined | Genome-fragment | NA              | 0     |       |
| S17-final-viral-combined_k141_122280  O_partial | 25488 | Yes |    | 13572 | 9  | 5              | Low-quality     | Genome-fragment | 35.15 | 46.75 |
| S8_k141_143961                                  | 1451  | No  | NA | 0     | 9  | Not-determined | Genome-fragment | NA              | 0     |       |
| S7-final-viral-combined_k141_104726  full       | 25535 | Yes |    | 9282  | 4  | 9              | Low-quality     | Genome-fragment | 21.11 | 63.65 |
| S8_k141_247477                                  | 2993  | No  | NA | 0     | 1  | Not-determined | Genome-fragment | NA              | 0     |       |
| S8_k141_74739                                   | 1236  | No  | NA | 0     | 2  | Not-determined | Genome-fragment | NA              | 0     |       |
| S8_k141_108571                                  | 1175  | No  | NA | 0     | 2  | Not-determined | Genome-fragment | NA              | 0     |       |
| S3_k141_40590                                   | 25640 | No  | NA | 3     | 0  | Low-quality    | Genome-fragment | 24.54           | 0     |       |
| S8_k141_189780                                  | 2318  | No  | NA | 0     | 0  | Not-determined | Genome-fragment | NA              | 0     |       |
| S8_k141_63281                                   | 3428  | No  | NA | 0     | 0  | Not-determined | Genome-fragment | NA              | 0     |       |
| S8_k141_108613                                  | 1107  | No  | NA | 0     | 1  | Not-determined | Genome-fragment | NA              | 0     |       |
| S8_k141_51148                                   | 4073  | No  | NA | 0     | 2  | Not-determined | Genome-fragment | NA              | 0     |       |
| S11-final-viral-combined_k141_48227  full       | 25658 | Yes |    | 16039 | 7  | 1              | Low-quality     | Genome-fragment | 32.07 | 37.49 |
| S8_k141_28693                                   | 1459  | No  | NA | 0     | 0  | Not-determined | Genome-fragment | NA              | 0     |       |
| S8_k141_63337                                   | 1439  | No  | NA | 0     | 2  | Not-determined | Genome-fragment | NA              | 0     |       |
| S2-final-viral-combined_k141_209819  full       | 25672 | No  | NA | 9     | 0  | Low-quality    | Genome-fragment | 49.81           | 0     |       |
| S8_k141_179012                                  | 1311  | No  | NA | 0     | 1  | Not-determined | Genome-fragment | NA              | 0     |       |
| S8_k141_132216                                  | 1400  | No  | NA | 0     | 2  | Not-determined | Genome-fragment | NA              | 0     |       |
| S8_k141_144100                                  | 2477  | No  | NA | 0     | 1  | Not-determined | Genome-fragment | NA              | 0     |       |
| S8_k141_63398                                   | 1231  | No  | NA | 0     | 1  | Not-determined | Genome-fragment | NA              | 0     |       |
| S11-final-viral-combined_k141_59049  full       | 25737 | No  | NA | 3     | 6  | Low-quality    | Genome-fragment | 46.92           | 0     |       |
| S8_k141_15762                                   | 3326  | No  | NA | 0     | 1  | Not-determined | Genome-fragment | NA              | 0     |       |
| S8_k141_236389                                  | 5463  | No  | NA | 0     | 2  | Not-determined | Genome-fragment | NA              | 0     |       |
| S8_k141_15777                                   | 1070  | No  | NA | 0     | 1  | Not-determined | Genome-fragment | NA              | 0     |       |
| S8_k141_212707                                  | 1381  | No  | NA | 0     | 0  | Not-determined | Genome-fragment | NA              | 0     |       |
| S8_k141_132746                                  | 3316  | No  | NA | 0     | 1  | Not-determined | Genome-fragment | NA              | 0     |       |
| S8_k141_223983                                  | 1226  | No  | NA | 0     | 0  | Not-determined | Genome-fragment | NA              | 0     |       |
| S8_k141_144173                                  | 1109  | No  | NA | 0     | 1  | Not-determined | Genome-fragment | NA              | 0     |       |
| S8_k141_155273                                  | 1092  | No  | NA | 0     | 0  | Not-determined | Genome-fragment | NA              | 0     |       |
| S8_k141_155283                                  | 1137  | No  | NA | 0     | 0  | Not-determined | Genome-fragment | NA              | 0     |       |
| S4-final-viral-combined_k141_156635  full       | 25753 | Yes |    | 12471 | 3  | 9              | Low-quality     | Genome-fragment | 5.24  | 51.57 |
| S8_k141_108769                                  | 5758  | No  | NA | 0     | 2  | Not-determined | Genome-fragment | NA              | 0     |       |
| S8_k141_28814                                   | 2463  | No  | NA | 0     | 2  | Not-determined | Genome-fragment | NA              | 0     |       |
| S8_k141_132299                                  | 1194  | No  | NA | 0     | 0  | Not-determined | Genome-fragment | NA              | 0     |       |
| S8_k141_4806                                    | 1119  | No  | NA | 0     | 1  | Not-determined | Genome-fragment | NA              | 0     |       |
| S8_k141_179134                                  | 2030  | No  | NA | 0     | 1  | Not-determined | Genome-fragment | NA              | 0     |       |
| S8_k141_51263                                   | 1148  | No  | NA | 0     | 0  | Not-determined | Genome-fragment | NA              | 0     |       |
| S8_k141_132312                                  | 4913  | No  | NA | 0     | 0  | Not-determined | Genome-fragment | NA              | 0     |       |
| S12-final-viral-combined_k141_141246  full      | 25775 | No  | NA | 1     | 20 | Low-quality    | Genome-fragment | 39              | 0     |       |
| S8_k141_63444                                   | 3692  | No  | NA | 0     | 2  | Not-determined | Genome-fragment | NA              | 0     |       |
| S8_k141_120349                                  | 1060  | No  | NA | 0     | 2  | Not-determined | Genome-fragment | NA              | 0     |       |
| S8_k141_85682                                   | 5328  | No  | NA | 0     | 1  | Not-determined | Genome-fragment | NA              | 0     |       |
| S8_k141_4836                                    | 3473  | No  | NA | 0     | 2  | Not-determined | Genome-fragment | NA              | 0     |       |
| S11_k141_41490                                  | 25852 | No  | NA | 0     | 8  | Low-quality    | Genome-fragment | 31.93           | 0     |       |
| S8_k141_200220                                  | 1219  | No  | NA | 0     | 1  | Not-determined | Genome-fragment | NA              | 0     |       |
| S8_k141_247613                                  | 1512  | No  | NA | 0     | 1  | Not-determined | Genome-fragment | NA              | 0     |       |
| S8_k141_120374                                  | 10172 | No  | NA | 0     | 0  | Not-determined | Genome-fragment | NA              | 0     |       |
| S8_k141_224024                                  | 9132  | No  | NA | 0     | 1  | Not-determined | Genome-fragment | NA              | 0     |       |
| S8_k141_236433                                  | 2214  | No  | NA | 0     | 0  | Not-determined | Genome-fragment | NA              | 0     |       |
| S8_k141_120393                                  | 1427  | No  | NA | 0     | 1  | Not-determined | Genome-fragment | NA              | 0     |       |
| S8_k141_190019                                  | 1541  | No  | NA | 0     | 1  | Not-determined | Genome-fragment | NA              | 0     |       |
| S8_k141_85733                                   | 1097  | No  | NA | 0     | 1  | Not-determined | Genome-fragment | NA              | 0     |       |
| S8_k141_4877                                    | 1187  | No  | NA | 0     | 0  | Not-determined | Genome-fragment | NA              | 0     |       |
| S8_k141_190055                                  | 1256  | No  | NA | 0     | 0  | Not-determined | Genome-fragment | NA              | 0     |       |
| S8_k141_74977                                   | 1575  | No  | NA | 0     | 1  | Not-determined | Genome-fragment | NA              | 0     |       |
| S8_k141_179011                                  | 1151  | No  | NA | 0     | 1  | Not-determined | Genome-fragment | NA              | 0     |       |
| S8_k141_212847                                  | 1945  | No  | NA | 0     | 2  | Not-determined | Genome-fragment | NA              | 0     |       |
| S3-final-viral-combined_k141_120607  O_partial  | 25868 | Yes |    | 13870 | 5  | 6              | Low-quality     | Genome-fragment | 22.3  | 46.38 |
| S6-final-viral-combined_k141_139992  full       | 25964 | Yes |    | 3     | 1  | Low-quality    | Genome-fragment | 65.85           | 0     |       |
| S2-final-viral-combined_k141_105844  full       | 25991 | Yes |    | 15638 | 9  | 4              | Low-quality     | Genome-fragment | 41.4  | 39.83 |
| S7-final-viral-combined_k141_83431  full        | 26021 | No  | NA | 1     | 2  | Low-quality    | Genome-fragment | 34.45           | 0     |       |
| S6-final-viral-combined_k141_171919  full       | 26042 | No  | NA | 13    | 0  | Low-quality    | Genome-fragment | 32.26           | 0     |       |
| S8_k141_270538                                  | 2215  | No  | NA | 0     | 1  | Not-determined | Genome-fragment | NA              | 0     |       |
| S8_k141_166725                                  | 11468 | No  | NA | 0     | 2  | Not-determined | Genome-fragment | NA              | 0     |       |
| S12-final-viral-combined_k141_8028  full        | 26073 | No  | NA | 13    | 0  | Low-quality    | Genome-fragment | 31.21           | 0     |       |
| S12-final-viral-combined_k141_240485  full      | 26089 | Yes |    | 13614 | 3  | 1              | Low-quality     | Genome-fragment | 24.83 | 47.84 |
| S8_k141_236566                                  | 1307  | No  | NA | 0     | 0  | Not-determined | Genome-fragment | NA              | 0     |       |
| S2-final-viral-combined_k141_103700  O_partial  | 26152 | Yes |    | 14189 | 7  | 9              | Low-quality     | Genome-fragment | 17.38 | 45.74 |
| S5_k141_815                                     | 26171 | No  | NA | 7     | 2  | Low-quality    | Genome-fragment | 44.34           | 0     |       |
| S8_k141_166779                                  | 5626  | No  | NA | 0     | 3  | Not-determined | Genome-fragment | NA              | 0     |       |
| S4-final-viral-combined_k141_131178  O_partial  | 26228 | Yes |    | 12944 | 6  | 8              | Low-quality     | Genome-fragment | 16.34 | 50.65 |
| S8_k141_190168                                  | 3552  | No  | NA | 0     | 1  | Not-determined | Genome-fragment | NA              | 0     |       |
| S8_k141_97881                                   | 1017  | No  | NA | 0     | 0  | Not-determined | Genome-fragment | NA              | 0     |       |
| S3-final-viral-combined_k141_16291  full        | 26366 | No  | NA | 16    | 0  | Low-quality    | Genome-fragment | 43.51           | 0     |       |
| S8_k141_108901                                  | 1344  | No  | NA | 0     | 1  | Not-determined | Genome-fragment | NA              | 0     |       |
| S8_k141_212957                                  | 1040  | No  | NA | 0     | 0  | Not-determined | Genome-fragment | NA              | 0     |       |
| S8_k141_200429                                  | 4534  | No  | NA | 0     | 1  | Not-determined | Genome-fragment | NA              | 0     |       |
| S8_k141_166822                                  | 1541  | No  | NA | 0     | 0  | Not-determined | Genome-fragment | NA              | 0     |       |
| S8_k141_120562                                  | 4054  | No  | NA | 0     | 1  | Not-determined | Genome-fragment | NA              | 0     |       |
| S8_k141_5091                                    | 1347  | No  | NA | 0     | 1  | Not-determined | Genome-fragment | NA              | 0     |       |
| S3-final-viral-combined_k141_3474  full         | 26555 | Yes |    | 15048 | 6  | 6              | Low-quality     | Genome-fragment | 19    | 43.33 |
| S7-final-viral-combined_k141_127766  full       | 26560 | Yes |    | 17929 | 5  | 4              | Low-quality     | Genome-fragment | 30.61 | 32.5  |
| S8_k141_155590                                  | 1276  | No  | NA | 0     | 2  | Not-determined | Genome-fragment | NA              | 0     |       |
| S8_k141_213010                                  | 3452  | No  | NA | 0     | 3  | Not-determined | Genome-fragment | NA              | 0     |       |
| S8_k141_236662                                  | 3196  | No  | NA | 0     | 2  | Not-determined | Genome-fragment | NA              | 0     |       |
| S8_k141_270733                                  |       |     |    |       |    |                |                 |                 |       |       |



|                                                 |       |     |    |    |    |                |                 |    |       |
|-------------------------------------------------|-------|-----|----|----|----|----------------|-----------------|----|-------|
| S8_k141_224474                                  | 1448  | No  | NA | 0  | 1  | Not-determined | Genome-fragment | NA | 0     |
| S8_k141_248028                                  | 1562  | No  | NA | 0  | 0  | Not-determined | Genome-fragment | NA | 0     |
| S8_k141_5323                                    | 2114  | No  | NA | 0  | 0  | Not-determined | Genome-fragment | NA | 0     |
| S8_k141_29513                                   | 1194  | No  | NA | 0  | 1  | Not-determined | Genome-fragment | NA | 0     |
| S8_k141_29524                                   | 1261  | No  | NA | 0  | 1  | Not-determined | Genome-fragment | NA | 0     |
| S8_k141_5339                                    | 1447  | No  | NA | 0  | 1  | Not-determined | Genome-fragment | NA | 0     |
| S8_k141_144256                                  | 1325  | No  | NA | 0  | 1  | Not-determined | Genome-fragment | NA | 0     |
| S5-final-viral-combined_k141_18702[full]        | 27098 | Yes |    | 3  | 7  | Low-quality    | Genome-fragment |    | 63.76 |
| S8_k141_5348                                    | 1202  | No  | NA | 0  | 0  | Not-determined | Genome-fragment | NA | 0     |
| S2-final-viral-combined_k141_103450[full]       | 27098 | Yes |    | 6  | 9  | Low-quality    | Genome-fragment |    | 47.02 |
| S8_k141_224530                                  | 1782  | No  | NA | 0  | 1  | Not-determined | Genome-fragment | NA | 0     |
| S8_k141_167075                                  | 1708  | No  | NA | 0  | 0  | Not-determined | Genome-fragment | NA | 0     |
| S8_k141_248123                                  | 1195  | No  | NA | 0  | 1  | Not-determined | Genome-fragment | NA | 0     |
| S8_k141_51886                                   | 4285  | No  | NA | 0  | 2  | Not-determined | Genome-fragment | NA | 0     |
| S8_k141_98284                                   | 2182  | No  | NA | 0  | 1  | Not-determined | Genome-fragment | NA | 0     |
| S8_k141_155002                                  | 1252  | No  | NA | 0  | 0  | Not-determined | Genome-fragment | NA | 0     |
| S8_k141_109170                                  | 1023  | No  | NA | 0  | 1  | Not-determined | Genome-fragment | NA | 0     |
| S8_k141_248191                                  | 1210  | No  | NA | 0  | 2  | Not-determined | Genome-fragment | NA | 0     |
| S11-final-viral-combined_k141_106106[full]      | 27131 | Yes |    | 3  | 9  | Low-quality    | Genome-fragment |    | 48.77 |
| S8_k141_29650                                   | 1426  | No  | NA | 0  | 1  | Not-determined | Genome-fragment | NA | 0     |
| S8_k141_120942                                  | 1066  | No  | NA | 0  | 1  | Not-determined | Genome-fragment | NA | 0     |
| S8_k141_63894                                   | 4883  | No  | NA | 0  | 1  | Not-determined | Genome-fragment | NA | 0     |
| S8_k141_63897                                   | 2053  | No  | NA | 0  | 1  | Not-determined | Genome-fragment | NA | 0     |
| S8_k141_40720                                   | 1125  | No  | NA | 0  | 1  | Not-determined | Genome-fragment | NA | 0     |
| S8_k141_132837                                  | 1091  | No  | NA | 0  | 1  | Not-determined | Genome-fragment | NA | 0     |
| S8_k141_86148                                   | 1033  | No  | NA | 0  | 0  | Not-determined | Genome-fragment | NA | 0     |
| S8_k141_179736                                  | 1071  | No  | NA | 0  | 0  | Not-determined | Genome-fragment | NA | 0     |
| S8_k141_224862                                  | 1100  | No  | NA | 0  | 1  | Not-determined | Genome-fragment | NA | 0     |
| S8_k141_258202                                  | 1018  | No  | NA | 0  | 0  | Not-determined | Genome-fragment | NA | 0     |
| S8_k141_5515                                    | 1235  | No  | NA | 0  | 0  | Not-determined | Genome-fragment | NA | 0     |
| S5-final-viral-combined_k141_182127[0_partial]  | 27398 | Yes |    | 3  | 6  | Low-quality    | Genome-fragment |    | 24.14 |
| S8_k141_109311                                  | 1040  | No  | NA | 0  | 1  | Not-determined | Genome-fragment | NA | 0     |
| S8_k141_105856                                  | 27400 | Yes |    | 3  | 3  | Low-quality    | Genome-fragment |    | 13.86 |
| S8_k141_155998                                  | 1222  | No  | NA | 0  | 1  | Not-determined | Genome-fragment | NA | 0     |
| S8_k141_224757                                  | 1148  | No  | NA | 0  | 0  | Not-determined | Genome-fragment | NA | 0     |
| S8_k141_144496                                  | 1025  | No  | NA | 0  | 1  | Not-determined | Genome-fragment | NA | 0     |
| S9-final-viral-combined_k141_93806[0_partial]   | 27451 | Yes |    | 3  | 12 | Low-quality    | Genome-fragment |    | 66.25 |
| S8_k141_248317                                  | 1126  | No  | NA | 0  | 1  | Not-determined | Genome-fragment | NA | 0     |
| S11-final-viral-combined_k141_148610[full]      | 27598 | No  |    | 3  | 0  | Low-quality    | Genome-fragment |    | 24.92 |
| S8_k141_40865                                   | 6015  | No  | NA | 0  | 1  | Not-determined | Genome-fragment | NA | 0     |
| S1_k141_187812                                  | 27618 | No  | NA | 7  | 0  | Low-quality    | Genome-fragment |    | 40.87 |
| S8_k141_179589                                  | 1017  | No  | NA | 0  | 0  | Not-determined | Genome-fragment | NA | 0     |
| S8_k141_98414                                   | 1192  | No  | NA | 0  | 1  | Not-determined | Genome-fragment | NA | 0     |
| S8_k141_109393                                  | 1377  | No  | NA | 0  | 1  | Not-determined | Genome-fragment | NA | 0     |
| S8_k141_121090                                  | 1014  | No  | NA | 0  | 1  | Not-determined | Genome-fragment | NA | 0     |
| S8_k141_52117                                   | 4888  | No  | NA | 0  | 0  | Not-determined | Genome-fragment | NA | 0     |
| S8_k141_190666                                  | 1483  | No  | NA | 0  | 1  | Not-determined | Genome-fragment | NA | 0     |
| S8_k141_5594                                    | 1088  | No  | NA | 0  | 2  | Not-determined | Genome-fragment | NA | 0     |
| S8_k141_156051                                  | 1128  | No  | NA | 0  | 0  | Not-determined | Genome-fragment | NA | 0     |
| S8_k141_190691                                  | 1660  | No  | NA | 0  | 1  | Not-determined | Genome-fragment | NA | 0     |
| S7-final-viral-combined_k141_173684[full]       | 27626 | Yes |    | 7  | 11 | Low-quality    | Genome-fragment |    | 58.99 |
| S11-final-viral-combined_k141_233266[full]      | 27649 | Yes |    | 17 | 8  | Low-quality    | Genome-fragment |    | 41.63 |
| S8_k141_41025                                   | 1164  | No  | NA | 0  | 2  | Not-determined | Genome-fragment | NA | 0     |
| S8_k141_144647                                  | 1631  | No  | NA | 0  | 1  | Not-determined | Genome-fragment | NA | 0     |
| S8_k141_200949                                  | 1084  | No  | NA | 0  | 0  | Not-determined | Genome-fragment | NA | 0     |
| S11-final-viral-combined_k141_181500[0_partial] | 27656 | No  | NA | 2  | 6  | Low-quality    | Genome-fragment |    | 20.33 |
| S8_k141_224958                                  | 2087  | No  | NA | 0  | 2  | Not-determined | Genome-fragment | NA | 0     |
| S8_k141_190763                                  | 2051  | No  | NA | 0  | 0  | Not-determined | Genome-fragment | NA | 0     |
| S8_k141_16523                                   | 1017  | No  | NA | 0  | 2  | Not-determined | Genome-fragment | NA | 0     |
| S8_k141_271263                                  | 1597  | No  | NA | 0  | 0  | Not-determined | Genome-fragment | NA | 0     |
| S12_k141_355194                                 | 27763 | No  | NA | 1  | 2  | Low-quality    | Genome-fragment |    | 15.06 |
| S8_k141_41059                                   | 2773  | No  | NA | 0  | 1  | Not-determined | Genome-fragment | NA | 0     |
| S8_k141_29872                                   | 1580  | No  | NA | 0  | 1  | Not-determined | Genome-fragment | NA | 0     |
| S8_k141_98559                                   | 1954  | No  | NA | 0  | 1  | Not-determined | Genome-fragment | NA | 0     |
| S2-final-viral-combined_k141_74070[full]        | 27837 | Yes |    | 5  | 5  | Low-quality    | Genome-fragment |    | 34.56 |
| S8_k141_190781                                  | 31564 | No  | NA | 23 | 0  | Medium-quality | Genome-fragment |    | 69.89 |
| S8_k141_156182                                  | 1448  | No  | NA | 0  | 1  | Not-determined | Genome-fragment | NA | 0     |
| S2-final-viral-combined_k141_224593[full]       | 27891 | No  | NA | 2  | 1  | Low-quality    | Genome-fragment |    | 16.04 |
| S8_k141_201040                                  | 1065  | No  | NA | 0  | 1  | Not-determined | Genome-fragment | NA | 0     |
| S11_k141_125234                                 | 28039 | No  | NA | 3  | 0  | Low-quality    | Genome-fragment |    | 26.39 |
| S8_k141_180044                                  | 2003  | No  | NA | 0  | 1  | Not-determined | Genome-fragment | NA | 0     |
| S8_k141_201062                                  | 2011  | No  | NA | 0  | 1  | Not-determined | Genome-fragment | NA | 0     |
| S8_k141_64364                                   | 2498  | No  | NA | 0  | 0  | Not-determined | Genome-fragment | NA | 0     |
| S8_k141_248503                                  | 8670  | No  | NA | 0  | 3  | Not-determined | Genome-fragment | NA | 0     |
| S8_k141_121287                                  | 1093  | No  | NA | 0  | 1  | Not-determined | Genome-fragment | NA | 0     |
| S8_k141_41205                                   | 3691  | No  | NA | 0  | 0  | Not-determined | Genome-fragment | NA | 0     |
| S8_k141_5725                                    | 1516  | No  | NA | 0  | 0  | Not-determined | Genome-fragment | NA | 0     |
| S8_k141_271341                                  | 1392  | No  | NA | 0  | 1  | Not-determined | Genome-fragment | NA | 0     |
| S8_k141_167090                                  | 1275  | No  | NA | 0  | 2  | Not-determined | Genome-fragment | NA | 0     |
| S8_k141_213612                                  | 1376  | No  | NA | 0  | 1  | Not-determined | Genome-fragment | NA | 0     |
| S8_k141_133250                                  | 1049  | No  | NA | 0  | 0  | Not-determined | Genome-fragment | NA | 0     |
| S2-final-viral-combined_k141_130098[full]       | 28097 | No  | NA | 1  | 15 | Low-quality    | Genome-fragment |    | 31.54 |
| S8_k141_144835                                  | 1428  | No  | NA | 0  | 0  | Not-determined | Genome-fragment | NA | 0     |
| S8_k141_64471                                   | 2052  | No  | NA | 0  | 1  | Not-determined | Genome-fragment | NA | 0     |
| S8_k141_180176                                  | 1693  | No  | NA | 0  | 1  | Not-determined | Genome-fragment | NA | 0     |
| S5-final-viral-combined_k141_98955[full]        | 28123 | No  | NA | 2  | 11 | Low-quality    | Genome-fragment |    | 49.32 |
| S9-final-viral-combined_k141_88140[0_partial]   | 28132 | Yes |    | 3  | 12 | Low-quality    | Genome-fragment |    | 18.36 |
| S8_k141_52398                                   | 14079 | No  | NA | 0  | 5  | Not-determined | Genome-fragment | NA | 0     |
| S17-final-viral-combined_k141_115233[0_partial] | 18348 | No  | NA | 2  | 1  | Low-quality    | Genome-fragment |    | 44.31 |
| S8_k141_225150                                  | 1184  | No  | NA | 0  | 0  | Not-determined | Genome-fragment | NA | 0     |
| S8_k141_156283                                  | 3150  | No  | NA | 0  | 0  | Not-determined | Genome-fragment | NA | 0     |
| S8_k141_237400                                  | 3620  | No  | NA | 0  | 2  | Not-determined | Genome-fragment | NA | 0     |
| S8_k141_109732                                  | 3009  | No  | NA | 0  | 1  | Not-determined | Genome-fragment | NA | 0     |
| S8_k141_144935                                  | 1740  | No  | NA | 0  | 4  | Not-determined | Genome-fragment | NA | 0     |
| S8_k141_53462                                   | 1110  | No  | NA | 0  | 0  | Not-determined | Genome-fragment | NA | 0     |
| S8-final-viral-combined_k141_71889[full]        | 28151 | Yes |    | 8  | 14 | Low-quality    | Genome-fragment |    | 55.7  |
| S9-final-viral-combined_k141_86623[full]        | 28154 | Yes |    | 19 | 10 | Low-quality    | Genome-fragment |    | 52.73 |
| S7-final-viral-combined_k141_179127[full]       | 28156 | Yes |    | 4  | 13 | Low-quality    | Genome-fragment |    | 73.72 |
| S8_k141_180300                                  | 1007  | No  | NA | 0  | 0  | Not-determined | Genome-fragment | NA | 0     |
| S5-final-viral-combined_k141_91275[0_partial]   | 28179 | No  | NA | 1  | 10 | Low-quality    | Genome-fragment |    | 15.28 |
| S11-final-viral-combined_k141_41630[full]       | 28311 | No  | NA | 0  | 17 | Low-quality    | Genome-fragment |    | 6.95  |
| S8_k141_248656                                  | 1405  | No  | NA | 0  | 0  | Not-determined | Genome-fragment | NA | 0     |
| S8_k141_75907                                   | 1240  | No  | NA | 0  | 1  | Not-determined | Genome-fragment | NA | 0     |
| S8_k141_98755                                   | 5879  | No  | NA | 0  | 2  | Not-determined | Genome-fragment | NA | 0     |
| S8_k141_156395                                  | 1034  | No  | NA | 0  | 0  | Not-determined | Genome-fragment | NA | 0     |
| S8_k141_30102                                   | 1792  | No  | NA | 0  | 1  | Not-determined | Genome-fragment | NA | 0     |
| S8_k141_213713                                  | 2347  | No  | NA | 0  | 0  | Not-determined | Genome-fragment | NA | 0     |
| S8_k141_133445                                  | 1597  | No  | NA | 0  | 1  | Not-determined | Genome-fragment | NA | 0     |
| S8_k141_180393                                  | 3057  | No  | NA | 0  | 1  | Not-determined | Genome-fragment | NA | 0     |
| S2-final-viral-combined_k141_206808[full]       | 28331 | Yes |    | 3  | 9  | Low-quality    | Genome-fragment |    | 5.01  |
| S8_k141_52559                                   | 5034  | No  | NA | 0  | 2  | Not-determined | Genome-fragment | NA | 0     |
| S8_k141_258577                                  | 1513  | No  | NA | 0  | 0  | Not-determined | Genome-fragment | NA | 0     |
| S8_k141_5980                                    | 1013  | No  | NA | 0  | 1  | Not-determined | Genome-fragment | NA | 0     |
| S8_k141_30206                                   | 1280  | No  | NA | 0  | 0  | Not-determined | Genome-fragment | NA | 0     |
| S1-final-viral-combined_k141_100645[full]       | 28346 | No  | NA | 2  | 16 | Low-quality    | Genome-fragment |    | 44.89 |
| S8_k141_64635                                   | 1163  | No  | NA | 0  | 2  | Not-determined | Genome-fragment | NA | 0     |
| S2-final-viral-combined_k141_76645[full]        | 28413 | No  | NA | 6  | 1  | Low-quality    | Genome-fragment |    | 30.81 |
| S8_k141_20227                                   | 3582  | No  | NA | 0  | 0  | Not-determined | Genome-fragment | NA | 0     |
| S1_k141_218094                                  | 28437 | No  | NA | 1  | 1  | Low-quality    | Genome-fragment |    | 8.04  |
| S8_k141_248815                                  | 1010  | No  | NA | 0  | 1  | Not-determined | Genome-fragment | NA | 0     |
| S2-final-viral-combined_k141_178485[full]       | 28492 | Yes |    | 6  | 7  | Low-quality    | Genome-fragment |    | 17.4  |
| S8_k141_109599                                  | 1457  | No  | NA | 0  | 1  | Not-determined | Genome-fragment | NA | 0     |
| S8_k141_201452                                  | 1120  | No  | NA | 0  | 0  | Not-determined | Genome-fragment | NA | 0     |
| S8-final-viral-combined_k141_34759[1_partial]   | 28603 | Yes |    | 4  | 5  | Low-quality    | Genome-fragment |    | 17.62 |
| S12-final-viral-combined_k141_57374[full]       | 28617 | Yes |    | 7  | 8  | Low-quality    | Genome-fragment |    | 63.13 |
| S5_k141_101569                                  | 28783 | No  | NA | 1  | 6  | Low-quality    | Genome-fragment |    | 15.61 |
| S8_k141_201479                                  | 1218  | No  | NA | 0  | 1  | Not-determined | Genome-fragment | NA | 0     |
| S8_k141_41541                                   | 2862  | No  | NA | 0  | 1  | Not-determined | Genome-fragment | NA | 0     |
| S2-final-viral-combined_k141_240006[full]       | 29031 | No  | NA | 1  | 8  | Low-quality    | Genome-fragment |    | 32.59 |
| S8_k141_213901                                  | 1049  | No  | NA | 0  | 2  | Not-determined | Genome-fragment | NA | 0     |
| S8_k141_213916                                  | 1839  | No  | NA | 0  | 0  | Not-determined | Genome-fragment | NA | 0     |
| S9-final-viral-combined_k141_65073[0_partial]   | 29054 | Yes |    | 3  | 7  | Low-quality    | Genome-fragment |    | 38.27 |
| S8_k141_225446                                  | 1260  | No  | NA | 0  | 0  | Not-determined | Genome-fragment | NA | 0     |
| S8_k141_237621                                  | 3310  | No  | NA | 0  | 2  | Not-determined | Genome-fragment | NA | 0     |
| S8_k141_156586                                  | 1840  | No  | NA | 0  | 0  | Not-determined | Genome-fragment | NA | 0     |
| S8_k141_168042                                  | 1062  | No  | NA | 0  | 2  | Not-determined | Genome-fragment | NA | 0     |
| S2_k141_131222                                  | 29149 | No  | NA | 8  | 1  | Low-quality    | Genome-fragment |    | 29.4  |
| S8_k141_201508                                  | 3864  | No  | NA | 0  | 0  | Not-determined | Genome-fragment | NA | 0     |
| S8_k141_213953                                  | 1017  | No  | NA | 0  | 1  | Not-determined | Genome-fragment | NA | 0     |
| S9-final-viral-combined_k141_83924[0_partial]   | 29298 | Yes |    | 2  | 4  | Low-quality    | Genome-fragment |    | 8.19  |
| S8_k141_86882                                   | 1210  | No  | NA | 0  | 0  | Not-determined | Genome-fragment | NA | 0     |
| S8_k141_237640                                  | 1484  | No  | NA | 0  | 0  | Not-determined | Genome-fragment | NA | 0     |
| S8_k141_271753                                  | 1018  | No  | NA | 0  | 2  | Not-determined | Genome-fragment | NA | 0     |
| S17-final-viral-combined_k141_156069[full]      | 29358 | No  | NA | 6  | 3  | Low-quality    | Genome-fragment |    | 42.89 |
| S8_k141_156639                                  | 1606  | No  | NA | 0  | 1  | Not-determined | Genome-fragment | NA | 0     |
| S8_k141_76104                                   | 1919  | No  | NA | 0  | 0  | Not-determined |                 |    |       |



|                                                   |       |     |    |       |    |                |                 |    |       |
|---------------------------------------------------|-------|-----|----|-------|----|----------------|-----------------|----|-------|
| S8_k141_168296                                    | 1067  | No  | NA | 0     | 1  | Not-determined | Genome-fragment | NA | 0     |
| S8_k141_17130                                     | 1595  | No  | NA | 0     | 0  | Not-determined | Genome-fragment | NA | 0     |
| S8_k141_76297                                     | 1035  | No  | NA | 0     | 0  | Not-determined | Genome-fragment | NA | 0     |
| S8_k141_99212                                     | 7177  | No  | NA | 0     | 2  | Not-determined | Genome-fragment | NA | 0     |
| S8_k141_237774                                    | 1313  | No  | NA | 0     | 1  | Not-determined | Genome-fragment | NA | 0     |
| S3_k141_36297                                     | 30156 | No  | NA | 13    | 0  | Low-quality    | Genome-fragment | NA | 28.87 |
| S8_k141_168339                                    | 1907  | No  | NA | 0     | 1  | Not-determined | Genome-fragment | NA | 0     |
| S8_k141_30654                                     | 1009  | No  | NA | 0     | 3  | Not-determined | Genome-fragment | NA | 0     |
| S8_k141_256960                                    | 3453  | No  | NA | 0     | 0  | Not-determined | Genome-fragment | NA | 0     |
| S17-final-viral-combined_k141_251356  [full]      | 30298 | No  | NA | 4     | 0  | Low-quality    | Genome-fragment | NA | 36.8  |
| S8_k141_76324                                     | 3532  | No  | NA | 0     | 3  | Not-determined | Genome-fragment | NA | 0     |
| S8_k141_76326                                     | 1184  | No  | NA | 0     | 2  | Not-determined | Genome-fragment | NA | 0     |
| S2-final-viral-combined_k141_26158  [O_partial]   | 30424 | No  | NA | 2     | 8  | Low-quality    | Genome-fragment | NA | 19.2  |
| S8_k141_133929                                    | 1090  | No  | NA | 0     | 1  | Not-determined | Genome-fragment | NA | 0     |
| S8_k141_99298                                     | 1163  | No  | NA | 0     | 1  | Not-determined | Genome-fragment | NA | 0     |
| S1-final-viral-combined_k141_194818  [full]       | 30487 | Yes | NA | 10120 | 14 | Low-quality    | Genome-fragment | NA | 7.21  |
| S8_k141_30736                                     | 1020  | No  | NA | 0     | 1  | Not-determined | Genome-fragment | NA | 0     |
| S8_k141_201683                                    | 1033  | No  | NA | 0     | 12 | Not-determined | Genome-fragment | NA | 0     |
| S17-final-viral-combined_k141_127300  [full]      | 30549 | Yes | NA | 13047 | 5  | Low-quality    | Genome-fragment | NA | 16.18 |
| S8_k141_53027                                     | 1346  | No  | NA | 0     | 1  | Not-determined | Genome-fragment | NA | 0     |
| S8_k141_122026                                    | 1192  | No  | NA | 0     | 1  | Not-determined | Genome-fragment | NA | 0     |
| S8_k141_225819                                    | 2043  | No  | NA | 0     | 1  | Not-determined | Genome-fragment | NA | 0     |
| S11_k141_258059                                   | 30608 | No  | NA | 8     | 2  | Low-quality    | Genome-fragment | NA | 28.8  |
| S8_k141_134029                                    | 1217  | No  | NA | 0     | 2  | Not-determined | Genome-fragment | NA | 0     |
| S4_k141_17373                                     | 30725 | Yes | NA | 25244 | 4  | 5 Low-quality  | Genome-fragment | NA | 43.56 |
| S17-final-viral-combined_k141_138075  [full]      | 31014 | No  | NA | 0     | 0  | Low-quality    | Genome-fragment | NA | 49.43 |
| S8_k141_99376                                     | 3517  | No  | NA | 0     | 1  | Not-determined | Genome-fragment | NA | 0     |
| S2-final-viral-combined_k141_75144  [1_partial]   | 31028 | Yes | NA | 21077 | 2  | 9 Low-quality  | Genome-fragment | NA | 34.07 |
| S8_k141_134049                                    | 1576  | No  | NA | 0     | 2  | Not-determined | Genome-fragment | NA | 0     |
| S8_k141_65065                                     | 1227  | No  | NA | 0     | 1  | Not-determined | Genome-fragment | NA | 0     |
| S8_k141_237960                                    | 2027  | No  | NA | 0     | 2  | Not-determined | Genome-fragment | NA | 0     |
| S8_k141_214281                                    | 4232  | No  | NA | 0     | 3  | Not-determined | Genome-fragment | NA | 0     |
| S8-final-viral-combined_k141_115862  [full]       | 31472 | No  | NA | 1     | 3  | Low-quality    | Genome-fragment | NA | 25.51 |
| S8_k141_30842                                     | 1132  | No  | NA | 0     | 1  | Not-determined | Genome-fragment | NA | 0     |
| S8_k141_87370                                     | 1260  | No  | NA | 0     | 1  | Not-determined | Genome-fragment | NA | 0     |
| S8_k141_53090                                     | 1048  | No  | NA | 0     | 0  | Not-determined | Genome-fragment | NA | 0     |
| S8_k141_110386                                    | 1000  | No  | NA | 0     | 1  | Not-determined | Genome-fragment | NA | 0     |
| S11-final-viral-combined_k141_129364  [O_partial] | 31684 | Yes | NA | 20699 | 2  | 4 Low-quality  | Genome-fragment | NA | 15.32 |
| S8_k141_180967                                    | 1508  | No  | NA | 0     | 2  | Not-determined | Genome-fragment | NA | 0     |
| S8_k141_65147                                     | 1745  | No  | NA | 0     | 1  | Not-determined | Genome-fragment | NA | 0     |
| S8_k141_201839                                    | 1252  | No  | NA | 0     | 0  | Not-determined | Genome-fragment | NA | 0     |
| S8_k141_145708                                    | 1066  | No  | NA | 0     | 1  | Not-determined | Genome-fragment | NA | 0     |
| S8_k141_134165                                    | 1333  | No  | NA | 0     | 0  | Not-determined | Genome-fragment | NA | 0     |
| S1-final-viral-combined_k141_217597  [full]       | 32007 | No  | NA | 1     | 7  | Low-quality    | Genome-fragment | NA | 37.01 |
| S8_k141_134195                                    | 1391  | No  | NA | 0     | 0  | Not-determined | Genome-fragment | NA | 0     |
| S8_k141_110491                                    | 1285  | No  | NA | 0     | 1  | Not-determined | Genome-fragment | NA | 0     |
| S8_k141_191702                                    | 1144  | No  | NA | 0     | 0  | Not-determined | Genome-fragment | NA | 0     |
| S7-final-viral-combined_k141_84489  [full]        | 32148 | No  | NA | 3     | 4  | Low-quality    | Genome-fragment | NA | 17.13 |
| S2-final-viral-combined_k141_128426  [full]       | 32301 | No  | NA | 0     | 0  | Low-quality    | Genome-fragment | NA | 18.57 |
| S1-final-viral-combined_k141_53913  [full]        | 32611 | Yes | NA | 11846 | 2  | 10 Low-quality | Genome-fragment | NA | 10.67 |
| S8_k141_249296                                    | 1455  | No  | NA | 0     | 1  | Not-determined | Genome-fragment | NA | 0     |
| S8_k141_238142                                    | 1801  | No  | NA | 0     | 1  | Not-determined | Genome-fragment | NA | 0     |
| S8_k141_238169                                    | 1546  | No  | NA | 0     | 0  | Not-determined | Genome-fragment | NA | 0     |
| S8_k141_249310                                    | 2204  | No  | NA | 0     | 1  | Not-determined | Genome-fragment | NA | 0     |
| S8_k141_65218                                     | 3890  | No  | NA | 0     | 1  | Not-determined | Genome-fragment | NA | 0     |
| S8_k141_201926                                    | 1607  | No  | NA | 0     | 1  | Not-determined | Genome-fragment | NA | 0     |
| S8_k141_214445                                    | 1685  | No  | NA | 0     | 0  | Not-determined | Genome-fragment | NA | 0     |
| S1-final-viral-combined_k141_237598  [full]       | 32658 | Yes | NA | 18453 | 15 | Low-quality    | Genome-fragment | NA | 42.89 |
| S17-final-viral-combined_k141_219314  [full]      | 32760 | Yes | NA | 12861 | 5  | 14 Low-quality | Genome-fragment | NA | 15.54 |
| S8_k141_214462                                    | 1258  | No  | NA | 0     | 0  | Not-determined | Genome-fragment | NA | 0     |
| S8_k141_225981                                    | 2076  | No  | NA | 0     | 1  | Not-determined | Genome-fragment | NA | 0     |
| S8_k141_76674                                     | 1125  | No  | NA | 0     | 1  | Not-determined | Genome-fragment | NA | 0     |
| S8_k141_41893                                     | 2728  | No  | NA | 0     | 0  | Not-determined | Genome-fragment | NA | 0     |
| S8_k141_238275                                    | 1509  | No  | NA | 0     | 0  | Not-determined | Genome-fragment | NA | 0     |
| S5-final-viral-combined_k141_126862  [full]       | 32860 | No  | NA | 1     | 16 | Low-quality    | Genome-fragment | NA | 22.09 |
| S8_k141_122308                                    | 4104  | No  | NA | 0     | 0  | Not-determined | Genome-fragment | NA | 0     |
| S1-final-viral-combined_k141_218385  [full]       | 32950 | Yes | NA | 17134 | 5  | 10 Low-quality | Genome-fragment | NA | 43.56 |
| S8_k141_145899                                    | 2737  | No  | NA | 0     | 2  | Not-determined | Genome-fragment | NA | 0     |
| S8_k141_121224                                    | 1265  | No  | NA | 0     | 0  | Not-determined | Genome-fragment | NA | 0     |
| S8_k141_53272                                     | 1056  | No  | NA | 0     | 1  | Not-determined | Genome-fragment | NA | 0     |
| S8_k141_31140                                     | 1438  | No  | NA | 0     | 0  | Not-determined | Genome-fragment | NA | 0     |
| S8_k141_76745                                     | 1475  | No  | NA | 0     | 1  | Not-determined | Genome-fragment | NA | 0     |
| S17-final-viral-combined_k141_48445  [full]       | 33049 | No  | NA | 17    | 1  | Low-quality    | Genome-fragment | NA | 40.98 |
| S8_k141_201996                                    | 1188  | No  | NA | 0     | 0  | Not-determined | Genome-fragment | NA | 0     |
| S8_k141_202001                                    | 1118  | No  | NA | 0     | 1  | Not-determined | Genome-fragment | NA | 0     |
| S8_k141_259268                                    | 1022  | No  | NA | 0     | 0  | Not-determined | Genome-fragment | NA | 0     |
| S8_k141_122350                                    | 2084  | No  | NA | 0     | 2  | Not-determined | Genome-fragment | NA | 0     |
| S7-final-viral-combined_k141_74802  [O_partial]   | 33124 | No  | NA | 1     | 2  | Low-quality    | Genome-fragment | NA | 37.18 |
| S8_k141_65393                                     | 1102  | No  | NA | 0     | 1  | Not-determined | Genome-fragment | NA | 0     |
| S8_k141_238321                                    | 1675  | No  | NA | 0     | 2  | Not-determined | Genome-fragment | NA | 0     |
| S2-final-viral-combined_k141_150929  [O_partial]  | 33303 | Yes | NA | 18560 | 4  | 7 Low-quality  | Genome-fragment | NA | 41.1  |
| S8_k141_272320                                    | 1247  | No  | NA | 0     | 0  | Not-determined | Genome-fragment | NA | 0     |
| S8_k141_42026                                     | 4505  | No  | NA | 0     | 0  | Not-determined | Genome-fragment | NA | 0     |
| S8_k141_134413                                    | 1375  | No  | NA | 0     | 1  | Not-determined | Genome-fragment | NA | 0     |
| S8_k141_202049                                    | 1277  | No  | NA | 0     | 1  | Not-determined | Genome-fragment | NA | 0     |
| S8_k141_202054                                    | 1791  | No  | NA | 0     | 2  | Not-determined | Genome-fragment | NA | 0     |
| S8_k141_238380                                    | 1053  | No  | NA | 0     | 1  | Not-determined | Genome-fragment | NA | 0     |
| S8_k141_99691                                     | 1390  | No  | NA | 0     | 1  | Not-determined | Genome-fragment | NA | 0     |
| S8_k141_145085                                    | 1587  | No  | NA | 0     | 1  | Not-determined | Genome-fragment | NA | 0     |
| S8_k141_31228                                     | 1452  | No  | NA | 0     | 0  | Not-determined | Genome-fragment | NA | 0     |
| S8_k141_122410                                    | 1111  | No  | NA | 0     | 0  | Not-determined | Genome-fragment | NA | 0     |
| S8_k141_146002                                    | 4204  | No  | NA | 0     | 2  | Not-determined | Genome-fragment | NA | 0     |
| S2-final-viral-combined_k141_16054  [O_partial]   | 33318 | No  | NA | 1     | 5  | Low-quality    | Genome-fragment | NA | 48.41 |
| S8_k141_53394                                     | 1734  | No  | NA | 0     | 1  | Not-determined | Genome-fragment | NA | 0     |
| S8_k141_146024                                    | 1107  | No  | NA | 0     | 2  | Not-determined | Genome-fragment | NA | 0     |
| S8_k141_181243                                    | 1152  | No  | NA | 0     | 0  | Not-determined | Genome-fragment | NA | 0     |
| S8_k141_168862                                    | 1156  | No  | NA | 0     | 0  | Not-determined | Genome-fragment | NA | 0     |
| S8_k141_259318                                    | 1263  | No  | NA | 0     | 1  | Not-determined | Genome-fragment | NA | 0     |
| S8_k141_110578                                    | 1151  | No  | NA | 0     | 1  | Not-determined | Genome-fragment | NA | 0     |
| S1_k141_146020                                    | 33329 | No  | NA | 1     | 2  | Low-quality    | Genome-fragment | NA | 23.86 |
| S8_k141_31286                                     | 2616  | No  | NA | 0     | 2  | Not-determined | Genome-fragment | NA | 0     |
| S8_k141_249494                                    | 4564  | No  | NA | 0     | 0  | Not-determined | Genome-fragment | NA | 0     |
| S12_k141_335092                                   | 33424 | No  | NA | 2     | 4  | Low-quality    | Genome-fragment | NA | 14.97 |
| S5-final-viral-combined_k141_164620  [O_partial]  | 33704 | No  | NA | 1     | 4  | Low-quality    | Genome-fragment | NA | 37.83 |
| S8_k141_146063                                    | 1170  | No  | NA | 0     | 0  | Not-determined | Genome-fragment | NA | 0     |
| S8_k141_146088                                    | 1263  | No  | NA | 0     | 2  | Not-determined | Genome-fragment | NA | 0     |
| S8_k141_146090                                    | 1718  | No  | NA | 0     | 1  | Not-determined | Genome-fragment | NA | 0     |
| S8_k141_259354                                    | 1110  | No  | NA | 0     | 1  | Not-determined | Genome-fragment | NA | 0     |
| S8_k141_238489                                    | 1158  | No  | NA | 0     | 0  | Not-determined | Genome-fragment | NA | 0     |
| S8_k141_202194                                    | 1295  | No  | NA | 0     | 1  | Not-determined | Genome-fragment | NA | 0     |
| S8_k141_226143                                    | 3614  | No  | NA | 0     | 0  | Not-determined | Genome-fragment | NA | 0     |
| S7-final-viral-combined_k141_103212  [O_partial]  | 33715 | Yes | NA | 17224 | 10 | Low-quality    | Genome-fragment | NA | 22.32 |
| S8_k141_202213                                    | 1552  | No  | NA | 0     | 1  | Not-determined | Genome-fragment | NA | 0     |
| S8_k141_87751                                     | 1775  | No  | NA | 0     | 0  | Not-determined | Genome-fragment | NA | 0     |
| S8_k141_181307                                    | 2153  | No  | NA | 0     | 0  | Not-determined | Genome-fragment | NA | 0     |
| S1-final-viral-combined_k141_22297  [full]        | 33798 | Yes | NA | 16187 | 5  | 15 Low-quality | Genome-fragment | NA | 40.93 |
| S8_k141_31338                                     | 1260  | No  | NA | 0     | 0  | Not-determined | Genome-fragment | NA | 0     |
| S8_k141_6772                                      | 1090  | No  | NA | 0     | 0  | Not-determined | Genome-fragment | NA | 0     |
| S11-final-viral-combined_k141_21942  [O_partial]  | 33800 | Yes | NA | 14488 | 6  | 13 Low-quality | Genome-fragment | NA | 23.25 |
| S8_k141_146161                                    | 1806  | No  | NA | 0     | 0  | Not-determined | Genome-fragment | NA | 0     |
| S8_k141_42217                                     | 3210  | No  | NA | 0     | 4  | Not-determined | Genome-fragment | NA | 0     |
| S11-final-viral-combined_k141_141301  [full]      | 33879 | No  | NA | 4     | 1  | Low-quality    | Genome-fragment | NA | 34.71 |
| S8_k141_42237                                     | 1106  | No  | NA | 0     | 0  | Not-determined | Genome-fragment | NA | 0     |
| S8_k141_42242                                     | 1063  | No  | NA | 0     | 0  | Not-determined | Genome-fragment | NA | 0     |
| S8_k141_122485                                    | 1077  | No  | NA | 0     | 1  | Not-determined | Genome-fragment | NA | 0     |
| S8_k141_53562                                     | 1140  | No  | NA | 0     | 0  | Not-determined | Genome-fragment | NA | 0     |
| S8_k141_6824                                      | 1292  | No  | NA | 0     | 1  | Not-determined | Genome-fragment | NA | 0     |
| S8_k141_87812                                     | 1085  | No  | NA | 0     | 0  | Not-determined | Genome-fragment | NA | 0     |
| S2-final-viral-combined_k141_53444  [full]        | 33902 | Yes | NA | 12823 | 5  | 13 Low-quality | Genome-fragment | NA | 15.9  |
| S8_k141_181413                                    | 1269  | No  | NA | 0     | 0  | Not-determined | Genome-fragment | NA | 0     |
| S8_k141_77034                                     | 2237  | No  | NA | 0     | 0  | Not-determined | Genome-fragment | NA | 0     |
| S8_k141_87827                                     | 1360  | No  | NA | 0     | 1  | Not-determined | Genome-fragment | NA | 0     |
| S8_k141_134612                                    | 1329  | No  | NA | 0     | 0  | Not-determined | Genome-fragment | NA | 0     |
| S8_k141_169053                                    | 3576  | No  | NA | 0     | 1  | Not-determined | Genome-fragment | NA | 0     |
| S8_k141_202299                                    | 1173  | No  | NA | 0     | 1  | Not-determined | Genome-fragment | NA | 0     |
| S7-final-viral-combined_k141_80334  [full]        | 33913 | Yes | NA | 22223 | 12 | 3 Low-quality  | Genome-fragment | NA | 46.78 |
| S17-final-viral-combined_k141_140294  [O_partial] | 33987 | Yes | NA | 24521 | 2  | 4 Low-quality  | Genome-fragment | NA | 16.38 |
| S8_k141_122608                                    | 1121  | No  | NA | 0     | 2  | Not-determined | Genome-fragment | NA | 27.85 |
| S8_k141_146286                                    | 1037  | No  | NA | 0     | 0  | Not-determined | Genome-fragment | NA | 0     |
| S11-final-viral-combined_k141_313284  [full]      | 34171 | Yes | NA | 11779 | 3  | 13 Low-quality | Genome-fragment | NA | 41.05 |
| S8-final-viral-combined_k141_34759  [O_partial]   | 34226 | No  | NA | 0     | 2  | Low-quality    | Genome-fragment | NA | 36.98 |
| S8_k141_53641                                     | 2853  | No  | NA | 0     | 0  | Not-determined | Genome-fragment | NA | 0     |
| S8_k141_122627                                    | 1085  | No  | NA | 0     | 0  | Not-determined | Genome-fragment | NA | 0     |



|                                      |              |       |     |    |       |    |    |                |                 |       |       |
|--------------------------------------|--------------|-------|-----|----|-------|----|----|----------------|-----------------|-------|-------|
| S8-final-viral-combined_k141_196892  | [full]       | 35467 | Yes |    | 8105  | 5  | 22 | Low-quality    | Genome-fragment | 11.74 | 77.15 |
| S8_k141_215087                       |              | 2891  | No  | NA | 0     | 0  | 0  | Not-determined | Genome-fragment | NA    | 0     |
| S9-final-viral-combined_k141_47      | [full]       | 35555 | No  | NA | 0     | 0  | 23 | Low-quality    | Genome-fragment | 30.54 | 0     |
| S8_k141_111056                       |              | 54171 | No  | NA | 4     | 0  | 0  | Medium-quality | Genome-fragment | 56.87 | 0     |
| S8_k141_157975                       |              | 2607  | No  | NA | 0     | 0  | 2  | Not-determined | Genome-fragment | NA    | 0     |
| S8_k141_33944                        |              | 1781  | No  | NA | 0     | 0  | 0  | Not-determined | Genome-fragment | NA    | 0     |
| S8_k141_192177                       |              | 1061  | No  | NA | 0     | 0  | 0  | Not-determined | Genome-fragment | NA    | 0     |
| S8_k141_259721                       |              | 1068  | No  | NA | 0     | 0  | 1  | Not-determined | Genome-fragment | NA    | 0     |
| S8_k141_17960                        |              | 1474  | No  | NA | 0     | 0  | 0  | Not-determined | Genome-fragment | NA    | 0     |
| S8_k141_202507                       |              | 1252  | No  | NA | 0     | 0  | 2  | Not-determined | Genome-fragment | NA    | 0     |
| S8_k141_259742                       |              | 1812  | No  | NA | 0     | 0  | 5  | Not-determined | Genome-fragment | NA    | 0     |
| S8_k141_192193                       |              | 7389  | No  | NA | 0     | 0  | 3  | Not-determined | Genome-fragment | NA    | 0     |
| S8_k141_42553                        |              | 1708  | No  | NA | 0     | 0  | 1  | Not-determined | Genome-fragment | NA    | 0     |
| S12-final-viral-combined_k141_183146 | [full]       | 35615 | No  | NA | 1     | 4  | 4  | Low-quality    | Genome-fragment | 26.35 | 0     |
| S12-final-viral-combined_k141_287341 | [full]       | 55881 | Yes |    | 15801 | 4  | 13 | Low-quality    | Genome-fragment | 31.72 | 55.96 |
| S17-final-viral-combined_k141_366021 | [full]       | 55887 | Yes |    | 12572 | 5  | 18 | Low-quality    | Genome-fragment | 64.98 | 0     |
| S8_k141_123035                       |              | 1116  | No  | NA | 0     | 0  | 0  | Not-determined | Genome-fragment | NA    | 0     |
| S8_k141_215126                       |              | 5530  | No  | NA | 0     | 0  | 2  | Not-determined | Genome-fragment | NA    | 0     |
| S8_k141_134094                       |              | 1755  | No  | NA | 0     | 0  | 0  | Not-determined | Genome-fragment | NA    | 0     |
| S8_k141_7291                         |              | 1115  | No  | NA | 0     | 0  | 1  | Not-determined | Genome-fragment | NA    | 0     |
| S8_k141_259786                       |              | 1000  | No  | NA | 0     | 0  | 1  | Not-determined | Genome-fragment | NA    | 0     |
| S12-final-viral-combined_k141_275038 | [full]       | 36003 | Yes |    | 8418  | 6  | 24 | Low-quality    | Genome-fragment | 13.62 | 76.62 |
| S8_k141_146704                       |              | 1003  | No  | NA | 0     | 0  | 0  | Not-determined | Genome-fragment | NA    | 0     |
| S8_k141_54091                        |              | 1427  | No  | NA | 0     | 0  | 1  | Not-determined | Genome-fragment | NA    | 0     |
| S8_k141_31913                        |              | 1521  | No  | NA | 0     | 0  | 1  | Not-determined | Genome-fragment | NA    | 0     |
| S8_k141_135058                       |              | 1454  | No  | NA | 0     | 0  | 1  | Not-determined | Genome-fragment | NA    | 0     |
| S8_k141_100254                       |              | 1052  | No  | NA | 0     | 0  | 1  | Not-determined | Genome-fragment | NA    | 0     |
| S8_k141_123100                       |              | 1167  | No  | NA | 0     | 0  | 1  | Not-determined | Genome-fragment | NA    | 0     |
| S8_k141_192195                       |              | 1127  | No  | NA | 0     | 0  | 0  | Not-determined | Genome-fragment | NA    | 0     |
| S8_k141_181970                       |              | 9784  | No  | NA | 0     | 0  | 1  | Not-determined | Genome-fragment | NA    | 0     |
| S8_k141_54153                        |              | 1093  | No  | NA | 0     | 0  | 1  | Not-determined | Genome-fragment | NA    | 0     |
| S8_k141_158126                       |              | 1669  | No  | NA | 0     | 0  | 0  | Not-determined | Genome-fragment | NA    | 0     |
| S17-final-viral-combined_k141_234491 | [0, partial] | 36153 | Yes |    | 19781 | 7  | 13 | Low-quality    | Genome-fragment | 45.97 | 45.29 |
| S8_k141_239313                       |              | 3822  | No  | NA | 0     | 0  | 1  | Not-determined | Genome-fragment | NA    | 0     |
| S8_k141_60401                        |              | 1212  | No  | NA | 0     | 0  | 1  | Not-determined | Genome-fragment | NA    | 0     |
| S4-final-viral-combined_k141_114177  | [full]       | 36170 | No  | NA | 1     | 0  | 0  | Low-quality    | Genome-fragment | 23.97 | 0     |
| S5-final-viral-combined_k141_169295  | [full]       | 36199 | Yes |    | 9153  | 2  | 17 | Low-quality    | Genome-fragment | 28.21 | 74.71 |
| S8_k141_100348                       |              | 5221  | No  | NA | 0     | 0  | 2  | Not-determined | Genome-fragment | NA    | 0     |
| S8_k141_135179                       |              | 7048  | No  | NA | 0     | 0  | 2  | Not-determined | Genome-fragment | NA    | 0     |
| S8_k141_226726                       |              | 1082  | No  | NA | 0     | 0  | 0  | Not-determined | Genome-fragment | NA    | 0     |
| S8_k141_239371                       |              | 4205  | No  | NA | 0     | 0  | 2  | Not-determined | Genome-fragment | NA    | 0     |
| S8_k141_100381                       |              | 1729  | No  | NA | 0     | 0  | 0  | Not-determined | Genome-fragment | NA    | 0     |
| S8_k141_66112                        |              | 3258  | No  | NA | 0     | 0  | 1  | Not-determined | Genome-fragment | NA    | 0     |
| S8_k141_202684                       |              | 1031  | No  | NA | 0     | 0  | 1  | Not-determined | Genome-fragment | NA    | 0     |
| S9-final-viral-combined_k141_101611  | [full]       | 36618 | Yes |    | 13906 | 10 | 21 | Low-quality    | Genome-fragment | 34.87 | 64.24 |
| S8_k141_77716                        |              | 2947  | No  | NA | 0     | 0  | 2  | Not-determined | Genome-fragment | NA    | 0     |
| S8_k141_259850                       |              | 1004  | No  | NA | 0     | 0  | 0  | Not-determined | Genome-fragment | NA    | 0     |
| S8_k141_135208                       |              | 1080  | No  | NA | 0     | 0  | 0  | Not-determined | Genome-fragment | NA    | 0     |
| S8_k141_226765                       |              | 3101  | No  | NA | 0     | 0  | 2  | Not-determined | Genome-fragment | NA    | 0     |
| S8_k141_42944                        |              | 1319  | No  | NA | 0     | 0  | 1  | Not-determined | Genome-fragment | NA    | 0     |
| S11-final-viral-combined_k141_116141 | [full]       | 36819 | No  | NA | 1     | 0  | 28 | Low-quality    | Genome-fragment | 17.86 | 0     |
| S8_k141_235240                       |              | 1824  | No  | NA | 0     | 0  | 0  | Not-determined | Genome-fragment | NA    | 0     |
| S8_k141_146987                       |              | 1250  | No  | NA | 0     | 0  | 1  | Not-determined | Genome-fragment | NA    | 0     |
| S8_k141_77787                        |              | 1197  | No  | NA | 0     | 0  | 1  | Not-determined | Genome-fragment | NA    | 0     |
| S8_k141_215398                       |              | 1224  | No  | NA | 0     | 0  | 0  | Not-determined | Genome-fragment | NA    | 0     |
| S8_k141_158191                       |              | 1236  | No  | NA | 0     | 0  | 1  | Not-determined | Genome-fragment | NA    | 0     |
| S17-final-viral-combined_k141_189865 | [0, partial] | 36875 | Yes |    | 14420 | 6  | 12 | Low-quality    | Genome-fragment | 19.4  | 60.89 |
| S8_k141_169697                       |              | 3148  | No  | NA | 0     | 0  | 0  | Not-determined | Genome-fragment | NA    | 0     |
| S8_k141_169711                       |              | 1302  | No  | NA | 0     | 0  | 1  | Not-determined | Genome-fragment | NA    | 0     |
| S8_k141_202828                       |              | 1063  | No  | NA | 0     | 0  | 0  | Not-determined | Genome-fragment | NA    | 0     |
| S8_k141_239464                       |              | 2051  | No  | NA | 0     | 0  | 1  | Not-determined | Genome-fragment | NA    | 0     |
| S8_k141_100496                       |              | 1054  | No  | NA | 0     | 0  | 0  | Not-determined | Genome-fragment | NA    | 0     |
| S8_k141_32246                        |              | 1030  | No  | NA | 0     | 0  | 1  | Not-determined | Genome-fragment | NA    | 0     |
| S8_k141_32259                        |              | 1604  | No  | NA | 0     | 0  | 1  | Not-determined | Genome-fragment | NA    | 0     |
| S7-final-viral-combined_k141_1795    | [full]       | 36997 | No  | NA | 1     | 0  | 9  | Low-quality    | Genome-fragment | 41.53 | 0     |
| S8_k141_273131                       |              | 1183  | No  | NA | 0     | 0  | 1  | Not-determined | Genome-fragment | NA    | 0     |
| S8_k141_147170                       |              | 1349  | No  | NA | 0     | 0  | 1  | Not-determined | Genome-fragment | NA    | 0     |
| S8_k141_7403                         |              | 5776  | No  | NA | 0     | 0  | 2  | Not-determined | Genome-fragment | NA    | 0     |
| S8_k141_383094                       |              | 1453  | No  | NA | 0     | 0  | 1  | Not-determined | Genome-fragment | NA    | 0     |
| S8_k141_169828                       |              | 6096  | No  | NA | 0     | 0  | 2  | Not-determined | Genome-fragment | NA    | 0     |
| S8_k141_135399                       |              | 1332  | No  | NA | 0     | 0  | 1  | Not-determined | Genome-fragment | NA    | 0     |
| S6-final-viral-combined_k141_103573  | [0, partial] | 37121 | No  | NA | 1     | 0  | 9  | Low-quality    | Genome-fragment | 47.45 | 0     |
| S5-final-viral-combined_k141_102913  | [full]       | 37260 | No  | NA | 3     | 1  | 1  | Low-quality    | Genome-fragment | 24.23 | 0     |
| S8_k141_250288                       |              | 1228  | No  | NA | 0     | 0  | 0  | Not-determined | Genome-fragment | NA    | 0     |
| S8_k141_235554                       |              | 1205  | No  | NA | 0     | 0  | 0  | Not-determined | Genome-fragment | NA    | 0     |
| S2-final-viral-combined_k141_160149  | [full]       | 37277 | No  | NA | 1     | 12 | 12 | Low-quality    | Genome-fragment | 41.84 | 0     |
| S8_k141_126168                       |              | 37399 | No  | NA | 0     | 27 | 17 | Low-quality    | Genome-fragment | 13.17 | 0     |
| S8_k141_250300                       |              | 2547  | No  | NA | 0     | 0  | 2  | Not-determined | Genome-fragment | NA    | 0     |
| S8_k141_88426                        |              | 1156  | No  | NA | 0     | 0  | 1  | Not-determined | Genome-fragment | NA    | 0     |
| S8_k141_192653                       |              | 1553  | No  | NA | 0     | 0  | 3  | Not-determined | Genome-fragment | NA    | 0     |
| S8_k141_115577                       |              | 3531  | No  | NA | 0     | 0  | 3  | Not-determined | Genome-fragment | NA    | 0     |
| S8_k141_100635                       |              | 1145  | No  | NA | 0     | 0  | 1  | Not-determined | Genome-fragment | NA    | 0     |
| S8_k141_88436                        |              | 1319  | No  | NA | 0     | 0  | 1  | Not-determined | Genome-fragment | NA    | 0     |
| S8_k141_226989                       |              | 3439  | No  | NA | 0     | 0  | 2  | Not-determined | Genome-fragment | NA    | 0     |
| S11-final-viral-combined_k141_75058  | [full]       | 37339 | Yes |    | 10764 | 5  | 15 | Low-quality    | Genome-fragment | 30.97 | 71.48 |
| S8_k141_135428                       |              | 9838  | No  | NA | 0     | 0  | 6  | Not-determined | Genome-fragment | NA    | 0     |
| S11-final-viral-combined_k141_306671 | [full]       | 37835 | Yes |    | 10781 | 4  | 17 | Low-quality    | Genome-fragment | 14.24 | 71.51 |
| S8_k141_147221                       |              | 1040  | No  | NA | 0     | 0  | 0  | Not-determined | Genome-fragment | NA    | 0     |
| S8_k141_150687                       |              | 2857  | No  | NA | 0     | 0  | 0  | Not-determined | Genome-fragment | NA    | 0     |
| S8_k141_100666                       |              | 1520  | No  | NA | 0     | 0  | 1  | Not-determined | Genome-fragment | NA    | 0     |
| S8_k141_123515                       |              | 1013  | No  | NA | 0     | 0  | 1  | Not-determined | Genome-fragment | NA    | 0     |
| S17-final-viral-combined_k141_191266 | [full]       | 37902 | No  | NA | 1     | 23 | 23 | Low-quality    | Genome-fragment | 25.95 | 0     |
| S8_k141_227034                       |              | 1532  | No  | NA | 0     | 0  | 0  | Not-determined | Genome-fragment | NA    | 0     |
| S8_k141_18444                        |              | 5537  | No  | NA | 0     | 0  | 1  | Not-determined | Genome-fragment | NA    | 0     |
| S8_k141_215442                       |              | 1119  | No  | NA | 0     | 0  | 1  | Not-determined | Genome-fragment | NA    | 0     |
| S8_k141_135536                       |              | 1450  | No  | NA | 0     | 0  | 0  | Not-determined | Genome-fragment | NA    | 0     |
| S8-final-viral-combined_k141_139022  | [0, partial] | 37967 | Yes |    | 18263 | 2  | 15 | Low-quality    | Genome-fragment | 11.36 | 51.9  |
| S8_k141_227088                       |              | 1096  | No  | NA | 0     | 0  | 1  | Not-determined | Genome-fragment | NA    | 0     |
| S8_k141_173180                       |              | 1314  | No  | NA | 0     | 0  | 0  | Not-determined | Genome-fragment | NA    | 0     |
| S8_k141_32430                        |              | 1115  | No  | NA | 0     | 0  | 1  | Not-determined | Genome-fragment | NA    | 0     |
| S1-final-viral-combined_k141_355800  | [full]       | 38229 | Yes |    | 19875 | 6  | 10 | Low-quality    | Genome-fragment | 39.83 | 48.01 |
| S8_k141_54623                        |              | 1609  | No  | NA | 0     | 0  | 2  | Not-determined | Genome-fragment | NA    | 0     |
| S8_k141_18504                        |              | 1042  | No  | NA | 0     | 0  | 1  | Not-determined | Genome-fragment | NA    | 0     |
| S9-final-viral-combined_k141_53997   | [full]       | 38272 | Yes |    | 19050 | 3  | 7  | Low-quality    | Genome-fragment | 9.83  | 50.22 |
| S8_k141_147444                       |              | 2164  | No  | NA | 0     | 0  | 2  | Not-determined | Genome-fragment | NA    | 0     |
| S1-final-viral-combined_k141_334278  | [full]       | 38307 | Yes |    | 27385 | 7  | 3  | Low-quality    | Genome-fragment | 38.87 | 28.51 |
| S1_k141_231066                       |              | 38309 | No  | NA | 0     | 2  | 5  | Low-quality    | Genome-fragment | 21.36 | 0     |
| S5-final-viral-combined_k141_132583  | [full]       | 38513 | Yes |    | 16604 | 2  | 12 | Low-quality    | Genome-fragment | 34.4  | 56.89 |
| S8_k141_258737                       |              | 39402 | No  | NA | 0     | 0  | 5  | Low-quality    | Genome-fragment | 41.02 | 0     |
| S7-final-viral-combined_k141_34924   | [full]       | 39528 | Yes |    | 22736 | 13 | 5  | Low-quality    | Genome-fragment | 47.25 | 42.48 |
| S8_k141_111817                       |              | 1679  | No  | NA | 0     | 0  | 0  | Not-determined | Genome-fragment | NA    | 0     |
| S7-final-viral-combined_k141_45014   | [full]       | 39761 | No  | NA | 1     | 0  | 1  | Low-quality    | Genome-fragment | 25.93 | 0     |
| S8_k141_111832                       |              | 1139  | No  | NA | 0     | 0  | 1  | Not-determined | Genome-fragment | NA    | 0     |
| S8_k141_259900                       |              | 39845 | No  | NA | 9     | 1  | 1  | Low-quality    | Genome-fragment | 29.92 | 0     |
| S8_k141_192891                       |              | 1379  | No  | NA | 0     | 0  | 0  | Not-determined | Genome-fragment | NA    | 0     |
| S8_k141_7629                         |              | 1278  | No  | NA | 0     | 0  | 1  | Not-determined | Genome-fragment | NA    | 0     |
| S8_k141_250429                       |              | 1616  | No  | NA | 0     | 0  | 1  | Not-determined | Genome-fragment | NA    | 0     |
| S8_k141_123801                       |              | 4784  | No  | NA | 0     | 0  | 2  | Not-determined | Genome-fragment | NA    | 0     |
| S8_k141_273426                       |              | 1338  | No  | NA | 0     | 0  | 0  | Not-determined | Genome-fragment | NA    | 0     |
| S8_k141_54764                        |              | 1578  | No  | NA | 0     | 0  | 0  | Not-determined | Genome-fragment | NA    | 0     |
| S8_k141_239811                       |              | 1107  | No  | NA | 0     | 0  | 0  | Not-determined | Genome-fragment | NA    | 0     |
| S2_k141_239668                       |              | 39863 | No  | NA | 0     | 0  | 1  | Low-quality    | Genome-fragment | 25.86 | 0     |
| S8_k141_7696                         |              | 1068  | No  | NA | 0     | 0  | 0  | Not-determined | Genome-fragment | NA    | 0     |
| S8_k141_182454                       |              | 1740  | No  | NA | 0     | 0  | 0  | Not-determined | Genome-fragment | NA    | 0     |
| S8_k141_18652                        |              | 3961  | No  | NA | 0     | 0  | 2  | Not-determined | Genome-fragment | NA    | 0     |
| S8_k141_7731                         |              | 1135  | No  | NA | 0     | 0  | 1  | Not-determined | Genome-fragment | NA    | 0     |
| S8_k141_54835                        |              | 2679  | No  | NA | 0     | 0  | 1  | Not-determined | Genome-fragment | NA    | 0     |
| S8_k141_88666                        |              | 1049  | No  | NA | 0     | 0  | 0  | Not-determined | Genome-fragment | NA    | 0     |
| S8_k141_18667</                      |              |       |     |    |       |    |    |                |                 |       |       |



|                                                |  |        |     |    |       |    |                |                 |                 |       |       |
|------------------------------------------------|--|--------|-----|----|-------|----|----------------|-----------------|-----------------|-------|-------|
| S8_k141_101274                                 |  | 1384   | No  | NA | 0     | 1  | Not-determined | Genome-fragment | NA              | 0     |       |
| S8_k141_147894                                 |  | 8831   | No  | NA | 0     | 1  | Not-determined | Genome-fragment | NA              | 0     |       |
| S8_k141_240131                                 |  | 1024   | No  | NA | 0     | 0  | Not-determined | Genome-fragment | NA              | 0     |       |
| S8_k141_216290                                 |  | 3415   | No  | NA | 0     | 1  | Not-determined | Genome-fragment | NA              | 0     |       |
| S8_k141_8028                                   |  | 4790   | No  | NA | 0     | 0  | Not-determined | Genome-fragment | NA              | 0     |       |
| S17-final-viral-combined_k141_70838  full      |  | 41232  | Yes | NA | 13001 | 17 | Low-quality    | Genome-fragment | NA              | 16.41 | 68.48 |
| S8_k141_216316                                 |  | 1327   | No  | NA | 0     | 1  | Not-determined | Genome-fragment | NA              | 0     |       |
| S6-final-viral-combined_k141_55357  full       |  | 41474  | Yes | NA | 14429 | 10 | 18             | Low-quality     | Genome-fragment | 16.84 | 65.21 |
| S8_k141_193257                                 |  | 1066   | No  | NA | 0     | 1  | Not-determined | Genome-fragment | NA              | 0     |       |
| S8_k141_260444                                 |  | 1127   | No  | NA | 0     | 1  | Not-determined | Genome-fragment | NA              | 0     |       |
| S8_k141_112262                                 |  | 3125   | No  | NA | 0     | 0  | Not-determined | Genome-fragment | NA              | 0     |       |
| S5-final-viral-combined_k141_39649  full       |  | 415259 | No  | NA | 2     | 8  | Low-quality    | Genome-fragment | NA              | 49.04 | 0     |
| S8_k141_148006                                 |  | 1595   | No  | NA | 0     | 1  | Not-determined | Genome-fragment | NA              | 0     |       |
| S8_k141_78607                                  |  | 1171   | No  | NA | 0     | 1  | Not-determined | Genome-fragment | NA              | 0     |       |
| S8_k141_124182                                 |  | 1348   | No  | NA | 0     | 1  | Not-determined | Genome-fragment | NA              | 0     |       |
| S8_k141_89152                                  |  | 1410   | No  | NA | 0     | 1  | Not-determined | Genome-fragment | NA              | 0     |       |
| S8_k141_136363                                 |  | 1687   | No  | NA | 0     | 0  | Not-determined | Genome-fragment | NA              | 0     |       |
| S8_k141_227743                                 |  | 1386   | No  | NA | 0     | 0  | Not-determined | Genome-fragment | NA              | 0     |       |
| S8_k141_19114                                  |  | 1065   | No  | NA | 0     | 1  | Not-determined | Genome-fragment | NA              | 0     |       |
| S8_k141_193354                                 |  | 1472   | No  | NA | 0     | 1  | Not-determined | Genome-fragment | NA              | 0     |       |
| S8_k141_136378                                 |  | 1865   | No  | NA | 0     | 1  | Not-determined | Genome-fragment | NA              | 0     |       |
| S8_k141_250918                                 |  | 4478   | No  | NA | 0     | 0  | Not-determined | Genome-fragment | NA              | 0     |       |
| S8_k141_150939                                 |  | 1166   | No  | NA | 0     | 2  | Not-determined | Genome-fragment | NA              | 0     |       |
| S8_k141_44012                                  |  | 1572   | No  | NA | 0     | 0  | Not-determined | Genome-fragment | NA              | 0     |       |
| S8_k141_182987                                 |  | 3301   | No  | NA | 0     | 1  | Not-determined | Genome-fragment | NA              | 0     |       |
| S8_k141_170472                                 |  | 3349   | No  | NA | 0     | 2  | Not-determined | Genome-fragment | NA              | 0     |       |
| S8-final-viral-combined_k141_183742  full      |  | 41665  | Yes | NA | 12280 | 6  | 21             | Low-quality     | Genome-fragment | 14.24 | 70.53 |
| S8_k141_148056                                 |  | 1041   | No  | NA | 0     | 0  | Not-determined | Genome-fragment | NA              | 0     |       |
| S8_k141_203664                                 |  | 2073   | No  | NA | 0     | 0  | Not-determined | Genome-fragment | NA              | 0     |       |
| S5-final-viral-combined_k141_52731  full       |  | 41772  | No  | NA | 1     | 7  | Low-quality    | Genome-fragment | NA              | 16.98 | 0     |
| S8_k141_193467                                 |  | 3092   | No  | NA | 0     | 1  | Not-determined | Genome-fragment | NA              | 0     |       |
| S8_k141_170549                                 |  | 3619   | No  | NA | 0     | 1  | Not-determined | Genome-fragment | NA              | 0     |       |
| S2-final-viral-combined_k141_84659  full       |  | 41944  | No  | NA | 3     | 2  | Low-quality    | Genome-fragment | NA              | 37.88 | 0     |
| S8_k141_227849                                 |  | 1175   | No  | NA | 0     | 0  | Not-determined | Genome-fragment | NA              | 0     |       |
| S1-final-viral-combined_k141_262801  full      |  | 42016  | Yes | NA | 20335 | 10 | 9              | Low-quality     | Genome-fragment | 45.31 | 51.6  |
| S8_k141_151153                                 |  | 1065   | No  | NA | 0     | 0  | Not-determined | Genome-fragment | NA              | 0     |       |
| S8_k141_227861                                 |  | 1031   | No  | NA | 0     | 1  | Not-determined | Genome-fragment | NA              | 0     |       |
| S8-final-viral-combined_k141_80639  full       |  | 42028  | Yes | NA | 11768 | 6  | 23             | Low-quality     | Genome-fragment | 19.41 | 72    |
| S8_k141_159162                                 |  | 1185   | No  | NA | 0     | 1  | Not-determined | Genome-fragment | NA              | 0     |       |
| S8_k141_8231                                   |  | 1325   | No  | NA | 0     | 0  | Not-determined | Genome-fragment | NA              | 0     |       |
| S8_k141_170581                                 |  | 7107   | No  | NA | 0     | 5  | Not-determined | Genome-fragment | NA              | 0     |       |
| S8_k141_193528                                 |  | 1594   | No  | NA | 0     | 1  | Not-determined | Genome-fragment | NA              | 0     |       |
| S8_k141_136572                                 |  | 1525   | No  | NA | 0     | 2  | Not-determined | Genome-fragment | NA              | 0     |       |
| S8_k141_216506                                 |  | 11021  | No  | NA | 0     | 7  | Not-determined | Genome-fragment | NA              | 0     |       |
| S8_k141_57014                                  |  | 1532   | No  | NA | 0     | 0  | Not-determined | Genome-fragment | NA              | 0     |       |
| S5-final-viral-combined_k141_179447  full      |  | 42059  | Yes | NA | 20303 | 2  | 19             | Low-quality     | Genome-fragment | 31.33 | 51.73 |
| S8-final-viral-combined_k141_132363  full      |  | 42292  | No  | NA | 0     | 0  | 27             | Low-quality     | Genome-fragment | 12.78 | 0     |
| S1-final-viral-combined_k141_130851  full      |  | 42384  | Yes | NA | 20276 | 15 | 15             | Low-quality     | Genome-fragment | 35.57 | 52.16 |
| S8_k141_78897                                  |  | 1360   | No  | NA | 0     | 0  | Not-determined | Genome-fragment | NA              | 0     |       |
| S17-final-viral-combined_k141_47162  O_partial |  | 43510  | Yes | NA | 21909 | 13 | 15             | Low-quality     | Genome-fragment | 44.66 | 49.65 |
| S8_k141_148207                                 |  | 1294   | No  | NA | 0     | 0  | Not-determined | Genome-fragment | NA              | 0     |       |
| S5-final-viral-combined_k141_13568  full       |  | 44522  | Yes | NA | 11078 | 0  | 10             | Low-quality     | Genome-fragment | 18.37 | 75.12 |
| S8_k141_148233                                 |  | 1070   | No  | NA | 0     | 1  | Not-determined | Genome-fragment | NA              | 0     |       |
| S8_k141_251082                                 |  | 1232   | No  | NA | 0     | 0  | Not-determined | Genome-fragment | NA              | 0     |       |
| S8_k141_55221                                  |  | 5229   | No  | NA | 0     | 10 | Not-determined | Genome-fragment | NA              | 0     |       |
| S8_k141_78917                                  |  | 1646   | No  | NA | 0     | 1  | Not-determined | Genome-fragment | NA              | 0     |       |
| S2-final-viral-combined_k141_239032  full      |  | 44560  | No  | NA | 1     | 23 | Low-quality    | Genome-fragment | NA              | 17    | 0     |
| S1-final-viral-combined_k141_227515  full      |  | 44610  | Yes | NA | 8596  | 5  | 20             | Low-quality     | Genome-fragment | 13.21 | 80.73 |
| S8_k141_240520                                 |  | 4543   | No  | NA | 0     | 1  | Not-determined | Genome-fragment | NA              | 0     |       |
| S8_k141_78947                                  |  | 1722   | No  | NA | 0     | 1  | Not-determined | Genome-fragment | NA              | 0     |       |
| S7-final-viral-combined_k141_10758  full       |  | 44860  | No  | NA | 1     | 4  | Low-quality    | Genome-fragment | NA              | 12.68 | 0     |
| S8_k141_19353                                  |  | 1405   | No  | NA | 0     | 0  | Not-determined | Genome-fragment | NA              | 0     |       |
| S3-final-viral-combined_k141_15467  full       |  | 45105  | No  | NA | 6     | 1  | Low-quality    | Genome-fragment | NA              | 29.88 | 0     |
| S8_k141_274105                                 |  | 7214   | No  | NA | 0     | 3  | Not-determined | Genome-fragment | NA              | 0     |       |
| S8_k141_8358                                   |  | 1821   | No  | NA | 0     | 1  | Not-determined | Genome-fragment | NA              | 0     |       |
| S8_k141_78971                                  |  | 1987   | No  | NA | 0     | 2  | Not-determined | Genome-fragment | NA              | 0     |       |
| S8_k141_136687                                 |  | 1229   | No  | NA | 0     | 1  | Not-determined | Genome-fragment | NA              | 0     |       |
| S2-final-viral-combined_k141_125615  O_partial |  | 46036  | Yes | NA | 16016 | 5  | 17             | Low-quality     | Genome-fragment | 15.54 | 65.21 |
| S8_k141_13360                                  |  | 1105   | No  | NA | 0     | 0  | Not-determined | Genome-fragment | NA              | 0     |       |
| S6-final-viral-combined_k141_134905  full      |  | 46301  | Yes | NA | 12108 | 5  | 19             | Low-quality     | Genome-fragment | 18.62 | 73.85 |
| S8_k141_79021                                  |  | 4536   | No  | NA | 0     | 1  | Not-determined | Genome-fragment | NA              | 0     |       |
| S8-final-viral-combined_k141_257014  O_partial |  | 46412  | Yes | NA | 27747 | 12 | 13             | Low-quality     | Genome-fragment | 37.17 | 40.23 |
| S12-final-viral-combined_k141_154703  full     |  | 46507  | No  | NA | 3     | 11 | Low-quality    | Genome-fragment | NA              | 23.61 | 0     |
| S8_k141_170757                                 |  | 2382   | No  | NA | 0     | 2  | Not-determined | Genome-fragment | NA              | 0     |       |
| S8_k141_136725                                 |  | 1830   | No  | NA | 0     | 0  | Not-determined | Genome-fragment | NA              | 0     |       |
| S8_k141_203905                                 |  | 6887   | No  | NA | 0     | 3  | Not-determined | Genome-fragment | NA              | 0     |       |
| S9-final-viral-combined_k141_5120  full        |  | 46706  | No  | NA | 2     | 7  | Low-quality    | Genome-fragment | NA              | 28.98 | 0     |
| S8_k141_33399                                  |  | 1157   | No  | NA | 0     | 1  | Not-determined | Genome-fragment | NA              | 0     |       |
| S8_k141_203921                                 |  | 2606   | No  | NA | 0     | 0  | Not-determined | Genome-fragment | NA              | 0     |       |
| S8_k141_79063                                  |  | 1907   | No  | NA | 0     | 1  | Not-determined | Genome-fragment | NA              | 0     |       |
| S1_k141_59716                                  |  | 46798  | No  | NA | 12    | 0  | Low-quality    | Genome-fragment | NA              | 34.19 | 0     |
| S8_k141_240673                                 |  | 5134   | No  | NA | 0     | 1  | Not-determined | Genome-fragment | NA              | 0     |       |
| S8_k141_240686                                 |  | 1110   | No  | NA | 0     | 0  | Not-determined | Genome-fragment | NA              | 0     |       |
| S8_k141_216774                                 |  | 1126   | No  | NA | 0     | 2  | Not-determined | Genome-fragment | NA              | 0     |       |
| S8_k141_215244                                 |  | 1000   | No  | NA | 0     | 0  | Not-determined | Genome-fragment | NA              | 0     |       |
| S8_k141_136781                                 |  | 3342   | No  | NA | 0     | 1  | Not-determined | Genome-fragment | NA              | 0     |       |
| S2_k141_230976                                 |  | 47181  | No  | NA | 12    | 1  | Low-quality    | Genome-fragment | NA              | 43.56 | 0     |
| S8_k141_33472                                  |  | 1087   | No  | NA | 0     | 0  | Not-determined | Genome-fragment | NA              | 0     |       |
| S8_k141_79156                                  |  | 4841   | No  | NA | 0     | 1  | Not-determined | Genome-fragment | NA              | 0     |       |
| S8-final-viral-combined_k141_243602  full      |  | 47613  | Yes | NA | 15607 | 5  | 19             | Low-quality     | Genome-fragment | 23.66 | 67.22 |
| S8_k141_240725                                 |  | 1720   | No  | NA | 0     | 1  | Not-determined | Genome-fragment | NA              | 0     |       |
| S8_k141_112748                                 |  | 1890   | No  | NA | 0     | 1  | Not-determined | Genome-fragment | NA              | 0     |       |
| S2-final-viral-combined_k141_131116  O_partial |  | 47724  | Yes | NA | 15946 | 4  | 19             | Low-quality     | Genome-fragment | 34.81 | 66.59 |
| S8_k141_136856                                 |  | 4764   | No  | NA | 0     | 1  | Not-determined | Genome-fragment | NA              | 0     |       |
| S8_k141_44453                                  |  | 1097   | No  | NA | 0     | 1  | Not-determined | Genome-fragment | NA              | 0     |       |
| S6_k141_101258                                 |  | 48465  | No  | NA | 7     | 0  | Low-quality    | Genome-fragment | NA              | 48.3  | 0     |
| S1-final-viral-combined_k141_371708  full      |  | 48526  | Yes | NA | 11650 | 9  | 27             | Low-quality     | Genome-fragment | 25.43 | 75.99 |
| S8_k141_251326                                 |  | 1365   | No  | NA | 0     | 3  | Not-determined | Genome-fragment | NA              | 0     |       |
| S8_k141_13601                                  |  | 1009   | No  | NA | 0     | 0  | Not-determined | Genome-fragment | NA              | 0     |       |
| S8_k141_101846                                 |  | 4842   | No  | NA | 0     | 2  | Not-determined | Genome-fragment | NA              | 0     |       |
| S8_k141_44582                                  |  | 1204   | No  | NA | 0     | 1  | Not-determined | Genome-fragment | NA              | 0     |       |
| S8_k141_79103                                  |  | 1249   | No  | NA | 0     | 0  | Not-determined | Genome-fragment | NA              | 0     |       |
| S8_k141_204136                                 |  | 1253   | No  | NA | 0     | 1  | Not-determined | Genome-fragment | NA              | 0     |       |
| S8_k141_260856                                 |  | 1229   | No  | NA | 0     | 1  | Not-determined | Genome-fragment | NA              | 0     |       |
| S8_k141_89817                                  |  | 1560   | No  | NA | 0     | 2  | Not-determined | Genome-fragment | NA              | 0     |       |
| S2-final-viral-combined_k141_125370  full      |  | 48761  | Yes | NA | 13802 | 6  | 21             | Low-quality     | Genome-fragment | 28.23 | 71.69 |
| S8_k141_112918                                 |  | 1213   | No  | NA | 0     | 1  | Not-determined | Genome-fragment | NA              | 0     |       |
| S8_k141_204168                                 |  | 3053   | No  | NA | 0     | 1  | Not-determined | Genome-fragment | NA              | 0     |       |
| S8_k141_204174                                 |  | 3000   | No  | NA | 0     | 2  | Not-determined | Genome-fragment | NA              | 0     |       |
| S17-final-viral-combined_k141_186805  full     |  | 48935  | No  | NA | 1     | 18 | Low-quality    | Genome-fragment | NA              | 33.82 | 0     |
| S8-final-viral-combined_k141_189169  full      |  | 49202  | Yes | NA | 24143 | 11 | 13             | Low-quality     | Genome-fragment | 40.02 | 50.93 |
| S8_k141_193942                                 |  | 1316   | No  | NA | 0     | 1  | Not-determined | Genome-fragment | NA              | 0     |       |
| S8_k141_148782                                 |  | 5608   | No  | NA | 0     | 1  | Not-determined | Genome-fragment | NA              | 0     |       |
| S12-final-viral-combined_k141_88126  full      |  | 49396  | Yes | NA | 12299 | 6  | 25             | Low-quality     | Genome-fragment | 15.53 | 75.1  |
| S8_k141_182721                                 |  | 1686   | No  | NA | 0     | 0  | Not-determined | Genome-fragment | NA              | 0     |       |
| S8_k141_137058                                 |  | 1035   | No  | NA | 0     | 0  | Not-determined | Genome-fragment | NA              | 0     |       |
| S8_k141_193981                                 |  | 1739   | No  | NA | 0     | 1  | Not-determined | Genome-fragment | NA              | 0     |       |
| S8_k141_228285                                 |  | 3216   | No  | NA | 0     | 0  | Not-determined | Genome-fragment | NA              | 0     |       |
| S8_k141_8619                                   |  | 1069   | No  | NA | 0     | 0  | Not-determined | Genome-fragment | NA              | 0     |       |
| S8_k141_8620                                   |  | 1262   | No  | NA | 0     | 1  | Not-determined | Genome-fragment | NA              | 0     |       |
| S8_k141_274271                                 |  | 1150   | No  | NA | 0     | 0  | Not-determined | Genome-fragment | NA              | 0     |       |
| S8_k141_241130                                 |  | 1741   | No  | NA | 0     | 1  | Not-determined | Genome-fragment | NA              | 0     |       |
| S8_k141_55753                                  |  | 1133   | No  | NA | 0     | 1  | Not-determined | Genome-fragment | NA              | 0     |       |
| S8_k141_79555                                  |  | 1117   | No  | NA | 0     | 0  | Not-determined | Genome-fragment | NA              | 0     |       |
| S8_k141_147465                                 |  | 1167   | No  | NA | 0     | 0  | Not-determined | Genome-fragment | NA              | 0     |       |
| S8_k141_67612                                  |  | 1048   | No  | NA | 0     | 1  | Not-determined | Genome-fragment | NA              | 0     |       |
| S8_k141_89970                                  |  | 1482   | No  | NA | 0     | 1  | Not-determined | Genome-fragment | NA              | 0     |       |
| S2_k141_141503                                 |  | 49431  | No  | NA | 11    | 4  | Low-quality    | Genome-fragment | NA              | 28.23 | 0     |
| S11_k141_267198                                |  | 49437  | No  | NA | 0     | 34 | Low-quality    | Genome-fragment | NA              | 16.08 | 0     |
| S8_k141_102134                                 |  |        |     |    |       |    |                |                 |                 |       |       |



|                                            |       |     |    |       |    |                |                 |                 |       |
|--------------------------------------------|-------|-----|----|-------|----|----------------|-----------------|-----------------|-------|
| S8_k141_204638                             | 1270  | No  | NA | 0     | 1  | Not-determined | Genome-fragment | NA              | 0     |
| S8_k141_160148                             | 1015  | No  | NA | 0     | 0  | Not-determined | Genome-fragment | NA              | 0     |
| S8_k141_9092                               | 1201  | No  | NA | 0     | 0  | Not-determined | Genome-fragment | NA              | 0     |
| S5_k141_82331                              | 54701 | No  | NA | 1     | 28 | Low-quality    | Genome-fragment | NA              | 31.53 |
| S8_k141_160173                             | 1397  | No  | NA | 0     | 0  | Not-determined | Genome-fragment | NA              | 0     |
| S8_k141_238829                             | 3063  | No  | NA | 0     | 2  | Not-determined | Genome-fragment | NA              | 0     |
| S8_k141_204675                             | 1200  | No  | NA | 0     | 1  | Not-determined | Genome-fragment | NA              | 0     |
| S17-final-viral-combined_k141_175742  full | 54877 | Yes | NA | 7128  | 6  | 28             | Low-quality     | Genome-fragment | 18.33 |
| S8_k141_113590                             | 2116  | No  | NA | 0     | 2  | Not-determined | Genome-fragment | NA              | 87.01 |
| S8_k141_211385                             | 55168 | No  | NA | 1     | 9  | Low-quality    | Genome-fragment | NA              | 22.41 |
| S8_k141_9134                               | 2069  | No  | NA | 0     | 0  | Not-determined | Genome-fragment | NA              | 0     |
| S8_k141_45414                              | 1194  | No  | NA | 0     | 1  | Not-determined | Genome-fragment | NA              | 0     |
| S8_k141_137721                             | 2063  | No  | NA | 0     | 0  | Not-determined | Genome-fragment | NA              | 0     |
| S2_k141_30628                              | 55427 | No  | NA | 7     | 2  | Low-quality    | Genome-fragment | NA              | 49.56 |
| S8_k141_252015                             | 2420  | No  | NA | 0     | 2  | Not-determined | Genome-fragment | NA              | 0     |
| S8_k141_184280                             | 1548  | No  | NA | 0     | 0  | Not-determined | Genome-fragment | NA              | 0     |
| S8_k141_9161                               | 2797  | No  | NA | 0     | 2  | Not-determined | Genome-fragment | NA              | 0     |
| S8_k141_68211                              | 1479  | No  | NA | 0     | 2  | Not-determined | Genome-fragment | NA              | 0     |
| S5-final-viral-combined_k141_71959  full   | 55574 | No  | NA | 2     | 28 | Low-quality    | Genome-fragment | NA              | 32.75 |
| S8_k141_90540                              | 1030  | No  | NA | 0     | 0  | Not-determined | Genome-fragment | NA              | 0     |
| S1-final-viral-combined_k141_318869  full  | 56055 | Yes | NA | 25620 | 3  | 18             | Low-quality     | Genome-fragment | 13    |
| S8_k141_274787                             | 1247  | No  | NA | 0     | 0  | Not-determined | Genome-fragment | NA              | 54.29 |
| S8_k141_90546                              | 1068  | No  | NA | 0     | 1  | Not-determined | Genome-fragment | NA              | 0     |
| S8_k141_68231                              | 1033  | No  | NA | 0     | 0  | Not-determined | Genome-fragment | NA              | 0     |
| S8_k141_20283                              | 1136  | No  | NA | 0     | 0  | Not-determined | Genome-fragment | NA              | 0     |
| S11-final-viral-combined_k141_205111  full | 56280 | Yes | NA | 11289 | 11 | 24             | Low-quality     | Genome-fragment | 18.71 |
| S2-final-viral-combined_k141_158151  full  | 56365 | Yes | NA | 21866 | 2  | 17             | Low-quality     | Genome-fragment | 25.86 |
| S8_k141_252132                             | 2005  | No  | NA | 0     | 2  | Not-determined | Genome-fragment | NA              | 61.21 |
| S1-final-viral-combined_k141_179384  full  | 56418 | Yes | NA | 24624 | 0  | 17             | Low-quality     | Genome-fragment | 46.1  |
| S8_k141_113693                             | 19665 | No  | NA | 10    | 1  | Medium-quality | Genome-fragment | NA              | 56.36 |
| S8_k141_228999                             | 1932  | No  | NA | 0     | 0  | Not-determined | Genome-fragment | NA              | 57.35 |
| S8_k141_204826                             | 1089  | No  | NA | 0     | 1  | Not-determined | Genome-fragment | NA              | 0     |
| S8_k141_261474                             | 1896  | No  | NA | 0     | 2  | Not-determined | Genome-fragment | NA              | 0     |
| S8_k141_160365                             | 1193  | No  | NA | 0     | 0  | Not-determined | Genome-fragment | NA              | 0     |
| S8_k141_241503                             | 2933  | No  | NA | 0     | 0  | Not-determined | Genome-fragment | NA              | 0     |
| S8_k141_30668                              | 1247  | No  | NA | 0     | 0  | Not-determined | Genome-fragment | NA              | 0     |
| S7_k141_40754                              | 56723 | No  | NA | 1     | 12 | Low-quality    | Genome-fragment | NA              | 30.77 |
| S8_k141_241535                             | 1167  | No  | NA | 0     | 0  | Not-determined | Genome-fragment | NA              | 0     |
| S8-final-viral-combined_k141_217031  full  | 57516 | Yes | NA | 14334 | 3  | 36             | Low-quality     | Genome-fragment | 34.58 |
| S9-final-viral-combined_k141_103057  full  | 57518 | Yes | NA | 10772 | 6  | 29             | Low-quality     | Genome-fragment | 75.08 |
| S8_k141_204901                             | 1040  | No  | NA | 0     | 1  | Not-determined | Genome-fragment | NA              | 16.72 |
| S8_k141_9296                               | 1375  | No  | NA | 0     | 1  | Not-determined | Genome-fragment | NA              | 81.27 |
| S8_k141_241583                             | 1447  | No  | NA | 0     | 1  | Not-determined | Genome-fragment | NA              | 0     |
| S8-final-viral-combined_k141_105882  full  | 57691 | Yes | NA | 17957 | 4  | 34             | Low-quality     | Genome-fragment | 26.05 |
| S8_k141_171739                             | 1705  | No  | NA | 0     | 0  | Not-determined | Genome-fragment | NA              | 68.87 |
| S5_k141_33119                              | 58240 | No  | NA | 5     | 1  | Low-quality    | Genome-fragment | NA              | 37.88 |
| S1-final-viral-combined_k141_23655  full   | 58420 | Yes | NA | 19786 | 11 | 18             | Low-quality     | Genome-fragment | 32.8  |
| S8_k141_160473                             | 1164  | No  | NA | 0     | 0  | Not-determined | Genome-fragment | NA              | 66.13 |
| S9-final-viral-combined_k141_108121  full  | 58563 | Yes | NA | 13906 | 25 | 37             | Low-quality     | Genome-fragment | 19.26 |
| S7-final-viral-combined_k141_41216  full   | 58752 | Yes | NA | 17890 | 2  | 24             | Low-quality     | Genome-fragment | 76.25 |
| S8_k141_171757                             | 1052  | No  | NA | 0     | 2  | Not-determined | Genome-fragment | NA              | 39    |
| S17-final-viral-combined_k141_141841  full | 58804 | Yes | NA | 16182 | 14 | 24             | Low-quality     | Genome-fragment | 69.55 |
| S8_k141_68457                              | 1032  | No  | NA | 0     | 1  | Not-determined | Genome-fragment | NA              | 44.41 |
| S8_k141_217552                             | 1357  | No  | NA | 0     | 1  | Not-determined | Genome-fragment | NA              | 72.48 |
| S8_k141_160505                             | 1662  | No  | NA | 0     | 1  | Not-determined | Genome-fragment | NA              | 0     |
| S8_k141_137983                             | 4256  | No  | NA | 0     | 1  | Not-determined | Genome-fragment | NA              | 0     |
| S8_k141_217564                             | 1095  | No  | NA | 0     | 2  | Not-determined | Genome-fragment | NA              | 0     |
| S8-final-viral-combined_k141_113207  full  | 59358 | No  | NA | 2     | 39 | Low-quality    | Genome-fragment | NA              | 46.34 |
| S8_k141_217574                             | 1502  | No  | NA | 0     | 0  | Not-determined | Genome-fragment | NA              | 0     |
| S8_k141_204975                             | 1182  | No  | NA | 0     | 1  | Not-determined | Genome-fragment | NA              | 0     |
| S8_k141_102752                             | 1574  | No  | NA | 0     | 0  | Not-determined | Genome-fragment | NA              | 0     |
| S8_k141_125621                             | 1559  | No  | NA | 0     | 2  | Not-determined | Genome-fragment | NA              | 0     |
| S8_k141_275028                             | 1320  | No  | NA | 0     | 1  | Not-determined | Genome-fragment | NA              | 0     |
| S5-final-viral-combined_k141_18783  full   | 59609 | Yes | NA | 16696 | 6  | 21             | Low-quality     | Genome-fragment | 19.24 |
| S8_k141_80267                              | 1337  | No  | NA | 0     | 1  | Not-determined | Genome-fragment | NA              | 71.99 |
| S12-final-viral-combined_k141_170610  full | 60149 | Yes | NA | 20318 | 9  | 33             | Low-quality     | Genome-fragment | 0     |
| S8_k141_194926                             | 1280  | No  | NA | 0     | 1  | Not-determined | Genome-fragment | NA              | 66.22 |
| S9-final-viral-combined_k141_275141  full  | 60397 | Yes | NA | 31680 | 14 | 23             | Low-quality     | Genome-fragment | 48.48 |
| S5-final-viral-combined_k141_68979  full   | 60791 | No  | NA | 3     | 15 | Low-quality    | Genome-fragment | NA              | 46.93 |
| S8_k141_160572                             | 4347  | No  | NA | 0     | 0  | Not-determined | Genome-fragment | NA              | 47.55 |
| S8_k141_68515                              | 1116  | No  | NA | 0     | 1  | Not-determined | Genome-fragment | NA              | 29.4  |
| S8_k141_20528                              | 43375 | No  | NA | 31    | 0  | High-quality   | Genome-fragment | NA              | 0     |
| S8_k141_56481                              | 1557  | No  | NA | 0     | 0  | Not-determined | Genome-fragment | NA              | 98.6  |
| S8_k141_229154                             | 1968  | No  | NA | 0     | 0  | Not-determined | Genome-fragment | NA              | 0     |
| S12_k141_105069                            | 60967 | Yes | NA | 56966 | 15 | 0              | Low-quality     | Genome-fragment | 0     |
| S8_k141_80376                              | 1131  | No  | NA | 0     | 0  | Not-determined | Genome-fragment | NA              | 47.27 |
| S8_k141_9533                               | 2463  | No  | NA | 0     | 1  | Not-determined | Genome-fragment | NA              | 6.56  |
| S8_k141_261706                             | 1226  | No  | NA | 0     | 0  | Not-determined | Genome-fragment | NA              | 0     |
| S1-final-viral-combined_k141_313409  full  | 61049 | Yes | NA | 10610 | 31 | 31             | Low-quality     | Genome-fragment | 0     |
| S8_k141_45836                              | 1242  | No  | NA | 0     | 1  | Not-determined | Genome-fragment | NA              | 7.79  |
| S8_k141_195016                             | 2269  | No  | NA | 0     | 1  | Not-determined | Genome-fragment | NA              | 82.62 |
| S8_k141_252141                             | 1067  | No  | NA | 0     | 1  | Not-determined | Genome-fragment | NA              | 0     |
| S8_k141_125852                             | 1525  | No  | NA | 0     | 3  | Not-determined | Genome-fragment | NA              | 0     |
| S8_k141_20605                              | 1176  | No  | NA | 0     | 1  | Not-determined | Genome-fragment | NA              | 0     |
| S8_k141_171961                             | 1234  | No  | NA | 0     | 0  | Not-determined | Genome-fragment | NA              | 0     |
| S6_k141_12993                              | 62126 | No  | NA | 4     | 0  | Low-quality    | Genome-fragment | NA              | 34.98 |
| S6-final-viral-combined_k141_124845  full  | 63201 | No  | NA | 20703 | 3  | 17             | Low-quality     | Genome-fragment | 49.45 |
| S2-final-viral-combined_k141_218586  full  | 63434 | Yes | NA | 0     | 3  | 21             | Low-quality     | Genome-fragment | 34.79 |
| S8_k141_138168                             | 1537  | No  | NA | 0     | 1  | Not-determined | Genome-fragment | NA              | 67.36 |
| S8_k141_56554                              | 8120  | No  | NA | 0     | 2  | Not-determined | Genome-fragment | NA              | 0     |
| S8_k141_45863                              | 1016  | No  | NA | 0     | 1  | Not-determined | Genome-fragment | NA              | 0     |
| S8_k141_205162                             | 1007  | No  | NA | 0     | 1  | Not-determined | Genome-fragment | NA              | 0     |
| S8_k141_275232                             | 1316  | No  | NA | 0     | 0  | Not-determined | Genome-fragment | NA              | 0     |
| S8_k141_275234                             | 1183  | No  | NA | 0     | 0  | Not-determined | Genome-fragment | NA              | 0     |
| S8_k141_68549                              | 5977  | No  | NA | 0     | 1  | Not-determined | Genome-fragment | NA              | 0     |
| S8_k141_252463                             | 1139  | No  | NA | 0     | 1  | Not-determined | Genome-fragment | NA              | 0     |
| S8_k141_20669                              | 1077  | No  | NA | 0     | 0  | Not-determined | Genome-fragment | NA              | 0     |
| S11-final-viral-combined_k141_28934  full  | 64287 | Yes | NA | 20121 | 12 | 32             | Low-quality     | Genome-fragment | 26.06 |
| S8_k141_113997                             | 1790  | No  | NA | 0     | 2  | Not-determined | Genome-fragment | NA              | 68.7  |
| S8_k141_160716                             | 1199  | No  | NA | 0     | 0  | Not-determined | Genome-fragment | NA              | 0     |
| S8_k141_275273                             | 6219  | No  | NA | 0     | 2  | Not-determined | Genome-fragment | NA              | 0     |
| S8_k141_68601                              | 1041  | No  | NA | 0     | 1  | Not-determined | Genome-fragment | NA              | 0     |
| S8_k141_45961                              | 1364  | No  | NA | 0     | 0  | Not-determined | Genome-fragment | NA              | 0     |
| S8_k141_172156                             | 1156  | No  | NA | 0     | 1  | Not-determined | Genome-fragment | NA              | 0     |
| S8_k141_114080                             | 1272  | No  | NA | 0     | 0  | Not-determined | Genome-fragment | NA              | 0     |
| S8_k141_172164                             | 1509  | No  | NA | 0     | 1  | Not-determined | Genome-fragment | NA              | 0     |
| S8_k141_195101                             | 1257  | No  | NA | 0     | 1  | Not-determined | Genome-fragment | NA              | 0     |
| S8_k141_20816                              | 1166  | No  | NA | 0     | 0  | Not-determined | Genome-fragment | NA              | 0     |
| S8_k141_275434                             | 1009  | No  | NA | 0     | 2  | Not-determined | Genome-fragment | NA              | 0     |
| S8_k141_205321                             | 2004  | No  | NA | 0     | 1  | Not-determined | Genome-fragment | NA              | 0     |
| S8_k141_171944                             | 1621  | No  | NA | 0     | 1  | Not-determined | Genome-fragment | NA              | 0     |
| S12-final-viral-combined_k141_3824  full   | 64336 | Yes | NA | 13997 | 24 | Low-quality    | Genome-fragment | NA              | 22.46 |
| S17-final-viral-combined_k141_184906  full | 66539 | Yes | NA | 15238 | 10 | 19             | Low-quality     | Genome-fragment | 78.24 |
| S8_k141_271954                             | 1235  | No  | NA | 0     | 0  | Not-determined | Genome-fragment | NA              | 30.13 |
| S12-final-viral-combined_k141_295794  full | 67638 | Yes | NA | 18946 | 0  | 32             | Low-quality     | Genome-fragment | 77.1  |
| S8_k141_172239                             | 1117  | No  | NA | 0     | 1  | Not-determined | Genome-fragment | NA              | 14.11 |
| S8_k141_205349                             | 1168  | No  | NA | 0     | 1  | Not-determined | Genome-fragment | NA              | 71.99 |
| S8_k141_261868                             | 1160  | No  | NA | 0     | 1  | Not-determined | Genome-fragment | NA              | 0     |
| S8_k141_91118                              | 1645  | No  | NA | 0     | 1  | Not-determined | Genome-fragment | NA              | 0     |
| S1-final-viral-combined_k141_200256  full  | 69601 | Yes | NA | 8549  | 2  | 39             | Low-quality     | Genome-fragment | 0     |
| S8_k141_205379                             | 1157  | No  | NA | 0     | 3  | Not-determined | Genome-fragment | NA              | 18.68 |
| S11-final-viral-combined_k141_138533  full | 74510 | Yes | NA | 11703 | 36 | Low-quality    | Genome-fragment | NA              | 87.72 |
| S8_k141_46058                              | 1690  | No  | NA | 0     | 0  | Not-determined | Genome-fragment | NA              | 22.29 |
| S8_k141_91341                              | 1205  | No  | NA | 0     | 0  | Not-determined | Genome-fragment | NA              | 0     |
| S8_k141_229511                             | 5190  | No  | NA | 0     | 1  | Not-determined | Genome-fragment | NA              | 0     |
| S7-final-viral-combined_k141_27337  full   | 72311 | Yes | NA | 55695 | 5  | 9              | Low-quality     | Genome-fragment | 22.98 |
| S4_k141_55031                              | 74293 | No  | NA | 0     | 0  | Low-quality    | Genome-fragment | NA              | 49.83 |
| S8_k141_275511                             | 1190  | No  | NA | 0     | 0  | Not-determined | Genome-fragment | NA              | 42.8  |
| S5-final-viral-combined_k141_54548  full   | 74676 | No  | NA | 2     | 16 | Low-quality    | Genome-fragment | NA              | 0     |
| S8_k141_218112                             | 1722  | No  | NA | 0     | 0  | Not-determined | Genome-fragment | NA              | 46.3  |
| S8-final-viral-combined_k141_89744  full   | 75785 | Yes | NA | 14866 | 11 | 31             | Low-quality     | Genome-fragment | 0     |
| S17-final-viral-combined_k141_66285  full  | 78479 | Yes | NA | 22300 | 7  | 48             | Low-quality     | Genome-fragment | 42.49 |
| S8_k141_172451                             | 1181  | No  | NA | 0     | 1  | Not-determined | Genome-fragment | NA              | 80.38 |
| S8_k141_9880                               | 4305  | No  | NA | 0     | 2  | Not-determined | Genome-fragment | NA              | 41.36 |
| S8_k141_276265                             | 1677  | No  | NA | 0     | 1  | Not-determined | Genome-fragment | NA              | 0     |
| S11-final-viral-combined_k141_307157  full | 78492 | Yes | NA | 17704 | 9  | 44             | Low-quality     | Genome-fragment | 39.66 |
| S8_k141_20989                              | 1872  | No  | NA | 0     | 1  | Not-determined | Genome-fragment | NA              | 77.44 |
| S8_k141_141259                             | 4431  | No  | NA | 0     | 1  | Not-determined | Genome-fragment | NA              | 0     |
| S8_k141_161016                             | 1684  | No  | NA | 0     | 0  | Not-determined | Genome-fragment | NA              | 0     |
| S8_k141_103165                             | 6589  | No  | NA | 0     | 1  | Not-determined | Genome-fragment | NA              | 0     |
| S8_k141_229697                             | 1696  | No  | NA | 0     | 1  | Not-determined | Genome-fragment | NA              | 0     |
| S8                                         |       |     |    |       |    |                |                 |                 |       |



|                                            |        |     |    |       |    |     |                |                 |       |       |
|--------------------------------------------|--------|-----|----|-------|----|-----|----------------|-----------------|-------|-------|
| S2-final-viral-combined_k141_106420  full  | 84026  | Yes |    | 17717 | 7  | 43  | Low-quality    | Genome-fragment | 39.47 | 78.91 |
| S17-final-viral-combined_k141_45110  full  | 84635  | Yes |    | 8510  | 2  | 51  | Low-quality    | Genome-fragment | 8.98  | 89.95 |
| S8_k141_230058                             | 1215   | No  | NA |       | 0  | 1   | Not-determined | Genome-fragment | NA    | 0     |
| S11-final-viral-combined_k141_195758  full | 87232  | Yes |    | 27458 | 11 | 43  | Low-quality    | Genome-fragment | 42.39 | 68.52 |
| S8_k141_195504                             | 5505   | No  | NA |       | 0  | 1   | Not-determined | Genome-fragment | NA    | 0     |
| S8_k141_230081                             | 1307   | No  | NA |       | 0  | 4   | Not-determined | Genome-fragment | NA    | 0     |
| S5-final-viral-combined_k141_163318  full  | 88243  | No  | NA |       | 1  | 15  | Low-quality    | Genome-fragment | 47.86 | 0     |
| S8_k141_262319                             | 1187   | No  | NA |       | 0  | 1   | Not-determined | Genome-fragment | NA    | 0     |
| S8_k141_205942                             | 2000   | No  | NA |       | 0  | 0   | Not-determined | Genome-fragment | NA    | 0     |
| S8_k141_57316                              | 3680   | No  | NA |       | 0  | 0   | Not-determined | Genome-fragment | NA    | 0     |
| S17-final-viral-combined_k141_249003  full | 90402  | Yes |    | 19532 | 7  | 34  | Low-quality    | Genome-fragment | 27.74 | 78.39 |
| S2-final-viral-combined_k141_87140  full   | 90928  | Yes |    | 33522 | 12 | 39  | Low-quality    | Genome-fragment | 33.47 | 61.13 |
| S8_k141_230141                             | 3180   | No  | NA |       | 0  | 2   | Not-determined | Genome-fragment | NA    | 0     |
| S8_k141_92005                              | 1006   | No  | NA |       | 0  | 1   | Not-determined | Genome-fragment | NA    | 0     |
| S8_k141_262408                             | 3331   | No  | NA |       | 0  | 3   | Not-determined | Genome-fragment | NA    | 0     |
| S5-final-viral-combined_k141_27904  full   | 91336  | Yes |    | 18540 | 7  | 43  | Low-quality    | Genome-fragment | 33.1  | 79.7  |
| S5-final-viral-combined_k141_94195  full   | 92378  | Yes |    | 18130 | 12 | 52  | Low-quality    | Genome-fragment | 25.21 | 80.37 |
| S8_k141_230227                             | 3000   | No  | NA |       | 0  | 1   | Not-determined | Genome-fragment | NA    | 0     |
| S8_k141_57441                              | 2320   | No  | NA |       | 0  | 2   | Not-determined | Genome-fragment | NA    | 0     |
| S8_k141_253270                             | 1319   | No  | NA |       | 0  | 2   | Not-determined | Genome-fragment | NA    | 0     |
| S8_k141_262439                             | 1298   | No  | NA |       | 0  | 1   | Not-determined | Genome-fragment | NA    | 0     |
| S7-final-viral-combined_k141_41336  full   | 95933  | Yes |    | 22680 | 10 | 29  | Low-quality    | Genome-fragment | 41.15 | 76.36 |
| S8_k141_276090                             | 1110   | No  | NA |       | 0  | 0   | Not-determined | Genome-fragment | NA    | 0     |
| S8_k141_230299                             | 1059   | No  | NA |       | 0  | 0   | Not-determined | Genome-fragment | NA    | 0     |
| S8_k141_218786                             | 3380   | No  | NA |       | 0  | 1   | Not-determined | Genome-fragment | NA    | 0     |
| S17-final-viral-combined_k141_259195  full | 97860  | Yes |    | 51756 | 22 | 35  | Low-quality    | Genome-fragment | 43.3  | 46.84 |
| S8_k141_276202                             | 11517  | No  | NA |       | 0  | 1   | Not-determined | Genome-fragment | NA    | 0     |
| S7-final-viral-combined_k141_195842  full  | 98191  | Yes |    | 21525 | 7  | 51  | Low-quality    | Genome-fragment | 38.51 | 78.08 |
| S8_k141_10514                              | 1444   | No  | NA |       | 0  | 2   | Not-determined | Genome-fragment | NA    | 0     |
| S8_k141_276231                             | 3709   | No  | NA |       | 0  | 0   | Not-determined | Genome-fragment | NA    | 0     |
| S8_k141_262643                             | 1905   | No  | NA |       | 0  | 1   | Not-determined | Genome-fragment | NA    | 0     |
| S8_k141_10622                              | 1060   | No  | NA |       | 0  | 1   | Not-determined | Genome-fragment | NA    | 0     |
| S5-final-viral-combined_k141_32467  full   | 102578 | Yes |    | 64498 | 10 | 26  | Low-quality    | Genome-fragment | 42.85 | 37.12 |
| S8_k141_206419                             | 1066   | No  | NA |       | 0  | 1   | Not-determined | Genome-fragment | NA    | 0     |
| S8_k141_114979                             | 1009   | No  | NA |       | 0  | 1   | Not-determined | Genome-fragment | NA    | 0     |
| S6-final-viral-combined_k141_73644  full   | 105447 | Yes |    | 27309 | 5  | 47  | Low-quality    | Genome-fragment | 43.4  | 74.1  |
| S6-final-viral-combined_k141_106941  full  | 106838 | Yes |    | 20725 | 12 | 58  | Low-quality    | Genome-fragment | 24.89 | 80.6  |
| S2-final-viral-combined_k141_217413  full  | 115084 | Yes |    | 20266 | 19 | 68  | Low-quality    | Genome-fragment | 30.03 | 82.39 |
| S8_k141_262856                             | 1479   | No  | NA |       | 0  | 0   | Not-determined | Genome-fragment | NA    | 0     |
| S8_k141_262897                             | 2800   | No  | NA |       | 0  | 0   | Not-determined | Genome-fragment | NA    | 0     |
| S8_k141_21959                              | 2211   | No  | NA |       | 0  | 2   | Not-determined | Genome-fragment | NA    | 0     |
| S8_k141_115184                             | 3838   | No  | NA |       | 0  | 1   | Not-determined | Genome-fragment | NA    | 0     |
| S8_k141_21989                              | 3119   | No  | NA |       | 0  | 2   | Not-determined | Genome-fragment | NA    | 0     |
| S2-final-viral-combined_k141_16239  full   | 116261 | Yes |    | 19844 | 3  | 49  | Low-quality    | Genome-fragment | 46.33 | 82.93 |
| S8_k141_206724                             | 5111   | No  | NA |       | 0  | 5   | Not-determined | Genome-fragment | NA    | 0     |
| S8_k141_22079                              | 3243   | No  | NA |       | 0  | 0   | Not-determined | Genome-fragment | NA    | 0     |
| S2-final-viral-combined_k141_83135  full   | 119786 | Yes |    | 20368 | 6  | 60  | Low-quality    | Genome-fragment | 14.58 | 83    |
| S5-final-viral-combined_k141_174100  full  | 127560 | Yes |    | 24661 | 11 | 58  | Low-quality    | Genome-fragment | 36.86 | 80.67 |
| S5-final-viral-combined_k141_41618  full   | 134913 | Yes |    | 17541 | 18 | 71  | Low-quality    | Genome-fragment | 25.54 | 87    |
| S8_k141_22331                              | 1206   | No  | NA |       | 0  | 0   | Not-determined | Genome-fragment | NA    | 0     |
| S8_k141_263340                             | 2320   | No  | NA |       | 0  | 0   | Not-determined | Genome-fragment | NA    | 0     |
| S2-final-viral-combined_k141_156116  full  | 142752 | Yes |    | 33447 | 17 | 78  | Low-quality    | Genome-fragment | 48.88 | 76.57 |
| S8_k141_22478                              | 2270   | No  | NA |       | 0  | 1   | Not-determined | Genome-fragment | NA    | 0     |
| S8_k141_263535                             | 3069   | No  | NA |       | 0  | 4   | Not-determined | Genome-fragment | NA    | 0     |
| S8_k141_207135                             | 1492   | No  | NA |       | 0  | 1   | Not-determined | Genome-fragment | NA    | 0     |
| S12-final-viral-combined_k141_320161  full | 143327 | Yes |    | 23850 | 13 | 77  | Low-quality    | Genome-fragment | 37.9  | 83.36 |
| S8_k141_22622                              | 1958   | No  | NA |       | 0  | 2   | Not-determined | Genome-fragment | NA    | 0     |
| S1-final-viral-combined_k141_278285  full  | 158368 | Yes |    | 40349 | 8  | 78  | Low-quality    | Genome-fragment | 44.07 | 74.52 |
| S8_k141_22657                              | 1253   | No  | NA |       | 0  | 1   | Not-determined | Genome-fragment | NA    | 0     |
| S8_k141_263769                             | 1040   | No  | NA |       | 0  | 0   | Not-determined | Genome-fragment | NA    | 0     |
| S8_k141_11313                              | 4631   | No  | NA |       | 0  | 3   | Not-determined | Genome-fragment | NA    | 0     |
| S8_k141_11327                              | 3103   | No  | NA |       | 0  | 2   | Not-determined | Genome-fragment | NA    | 0     |
| S8_k141_11358                              | 1038   | No  | NA |       | 0  | 1   | Not-determined | Genome-fragment | NA    | 0     |
| S1-final-viral-combined_k141_230950  full  | 161096 | Yes |    | 36081 | 9  | 73  | Low-quality    | Genome-fragment | 41.22 | 77.6  |
| S8_k141_264050                             | 1138   | No  | NA |       | 0  | 0   | Not-determined | Genome-fragment | NA    | 0     |
| S8_k141_264100                             | 1271   | No  | NA |       | 0  | 0   | Not-determined | Genome-fragment | NA    | 0     |
| S8_k141_264116                             | 2239   | No  | NA |       | 0  | 1   | Not-determined | Genome-fragment | NA    | 0     |
| S8_k141_264225                             | 1570   | No  | NA |       | 0  | 2   | Not-determined | Genome-fragment | NA    | 0     |
| S8_k141_264431                             | 1113   | No  | NA |       | 0  | 1   | Not-determined | Genome-fragment | NA    | 0     |
| S8_k141_264449                             | 1075   | No  | NA |       | 0  | 2   | Not-determined | Genome-fragment | NA    | 0     |
| S5-final-viral-combined_k141_63625  full   | 224706 | Yes |    | 32735 | 18 | 129 | Low-quality    | Genome-fragment | 47.75 | 85.43 |
| S8_k141_264841                             | 1116   | No  | NA |       | 0  | 1   | Not-determined | Genome-fragment | NA    | 0     |
| S8_k141_264900                             | 1031   | No  | NA |       | 0  | 0   | Not-determined | Genome-fragment | NA    | 0     |



| <b>Table S3-2. WMS_vOTUs_checkv</b>  | Count | Mean    | Median | SD       |
|--------------------------------------|-------|---------|--------|----------|
| Complete (100% completeness)         | 63    | 90560.9 | 83257  | 63003.9  |
| High quality (90-100% completeness)  | 201   | 49058.3 | 44314  | 30073.6  |
| Medium quality (50-90% completeness) | 424   | 43571.4 | 31658  | 39059    |
| Low quality (< 50% completeness)     | 21576 | 3939    | 2116.5 | 6663     |
| Undetermined                         | 37489 | 2877.2  | 1899   | 3250.7   |
| Total vOTUs >= 1kb                   | 59753 | 38001.4 | 31658  | 24590.8  |
| Sum of 50-100% genome completeness   | 688   | 61063.5 | 44314  | 17022.05 |
